# Supplementary material for: Edge effects, electronic arrangement, and aromaticity patterns on finite-length carbon nanotubes
Source: Royal Society of Chemistry journal article supplement (doi:10.1039/c1cp20672a), 2011-01-01
Supplement: c1cp20672a.pdf [file c1cp20672a.pdf]

## Supplementary Information

# Edge effects, electronic arrangement, and geometry patterns on finite-length carbon nanotubes

*Francisco J. Martín-Martínez, Santiago Melchor, José A. Dobado\**

Grupo de Modelización y Diseño Molecular. Dpto. Química Orgánica. Facultad de  
Ciencias. c/Severo Ochoa s/n. Universidad de Granada. 18071-Granada. (Spain)

dobado@ugr.es

### TABLE OF CONTENTS:

- 1) **TubeAnalyzer plots**.....p S2-S7
- 2) **XYZ and energies for the structures studied** .....p S8-S854

# I. TubeAnalyzer MBL plots for (6,6) nanotube:

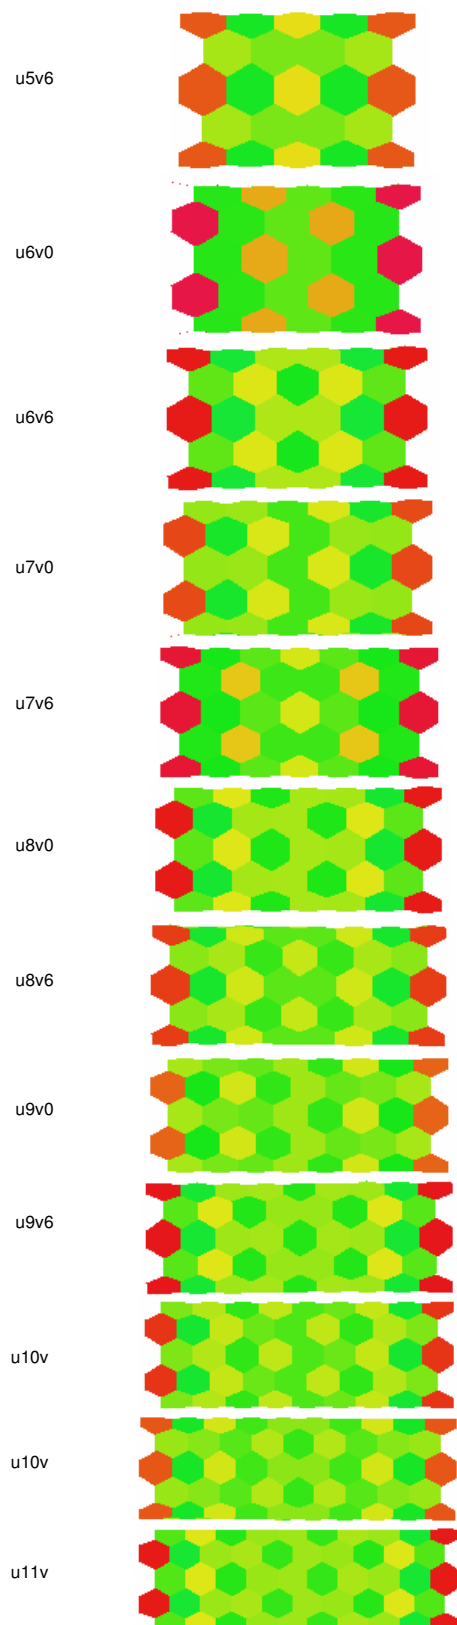

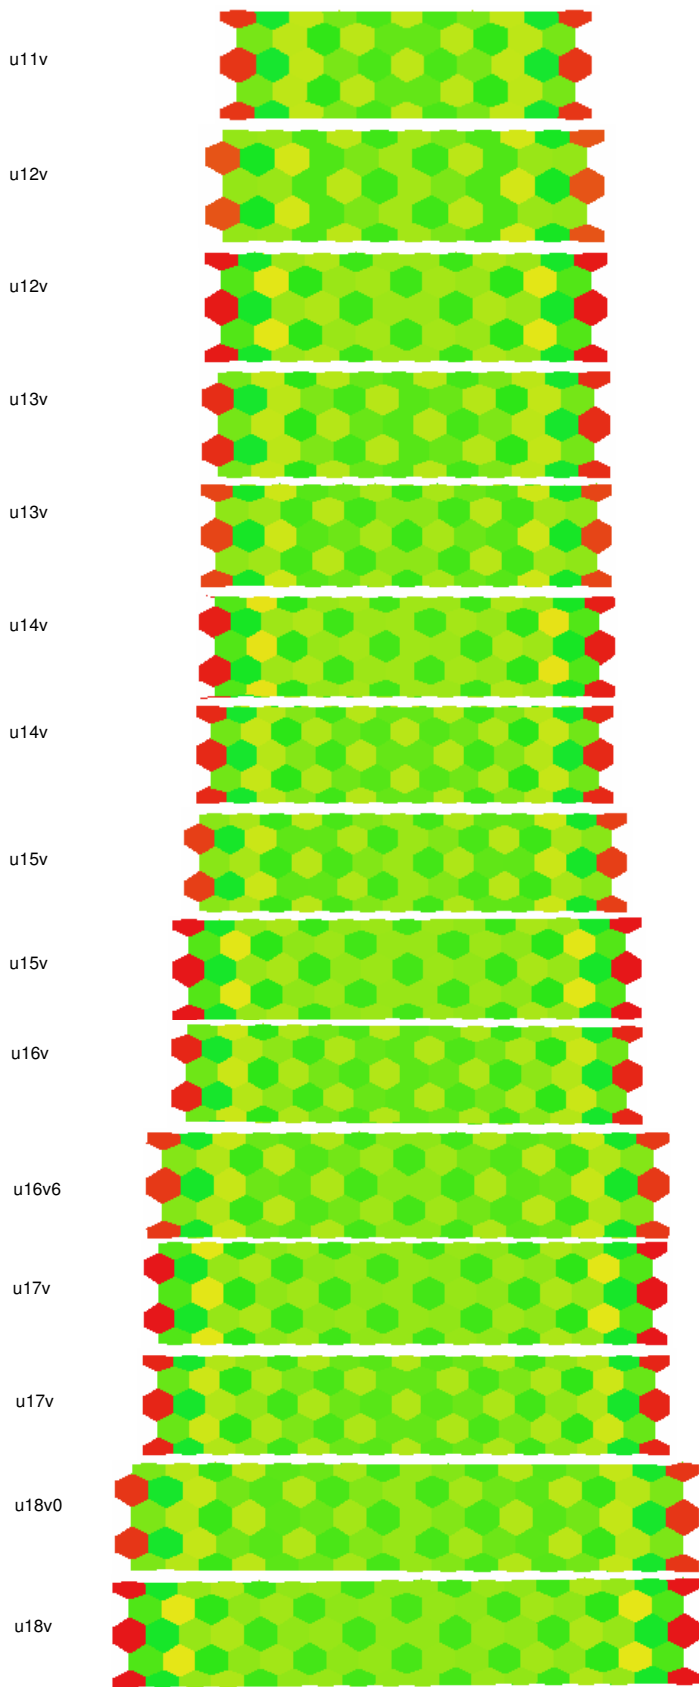

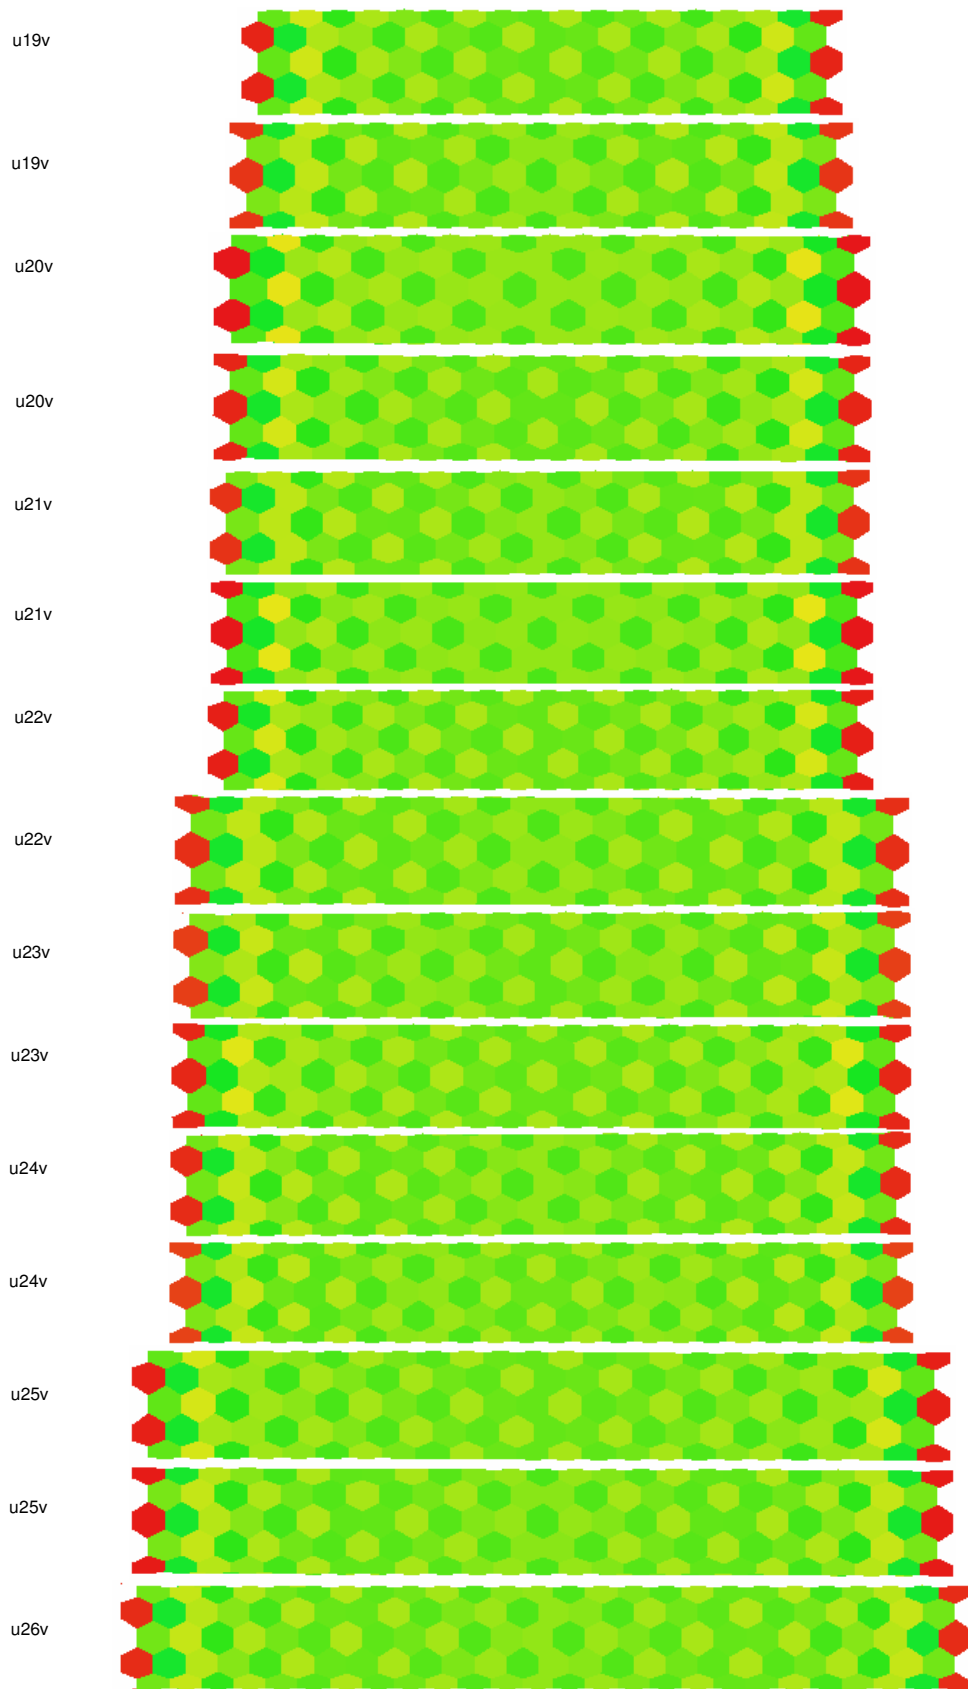

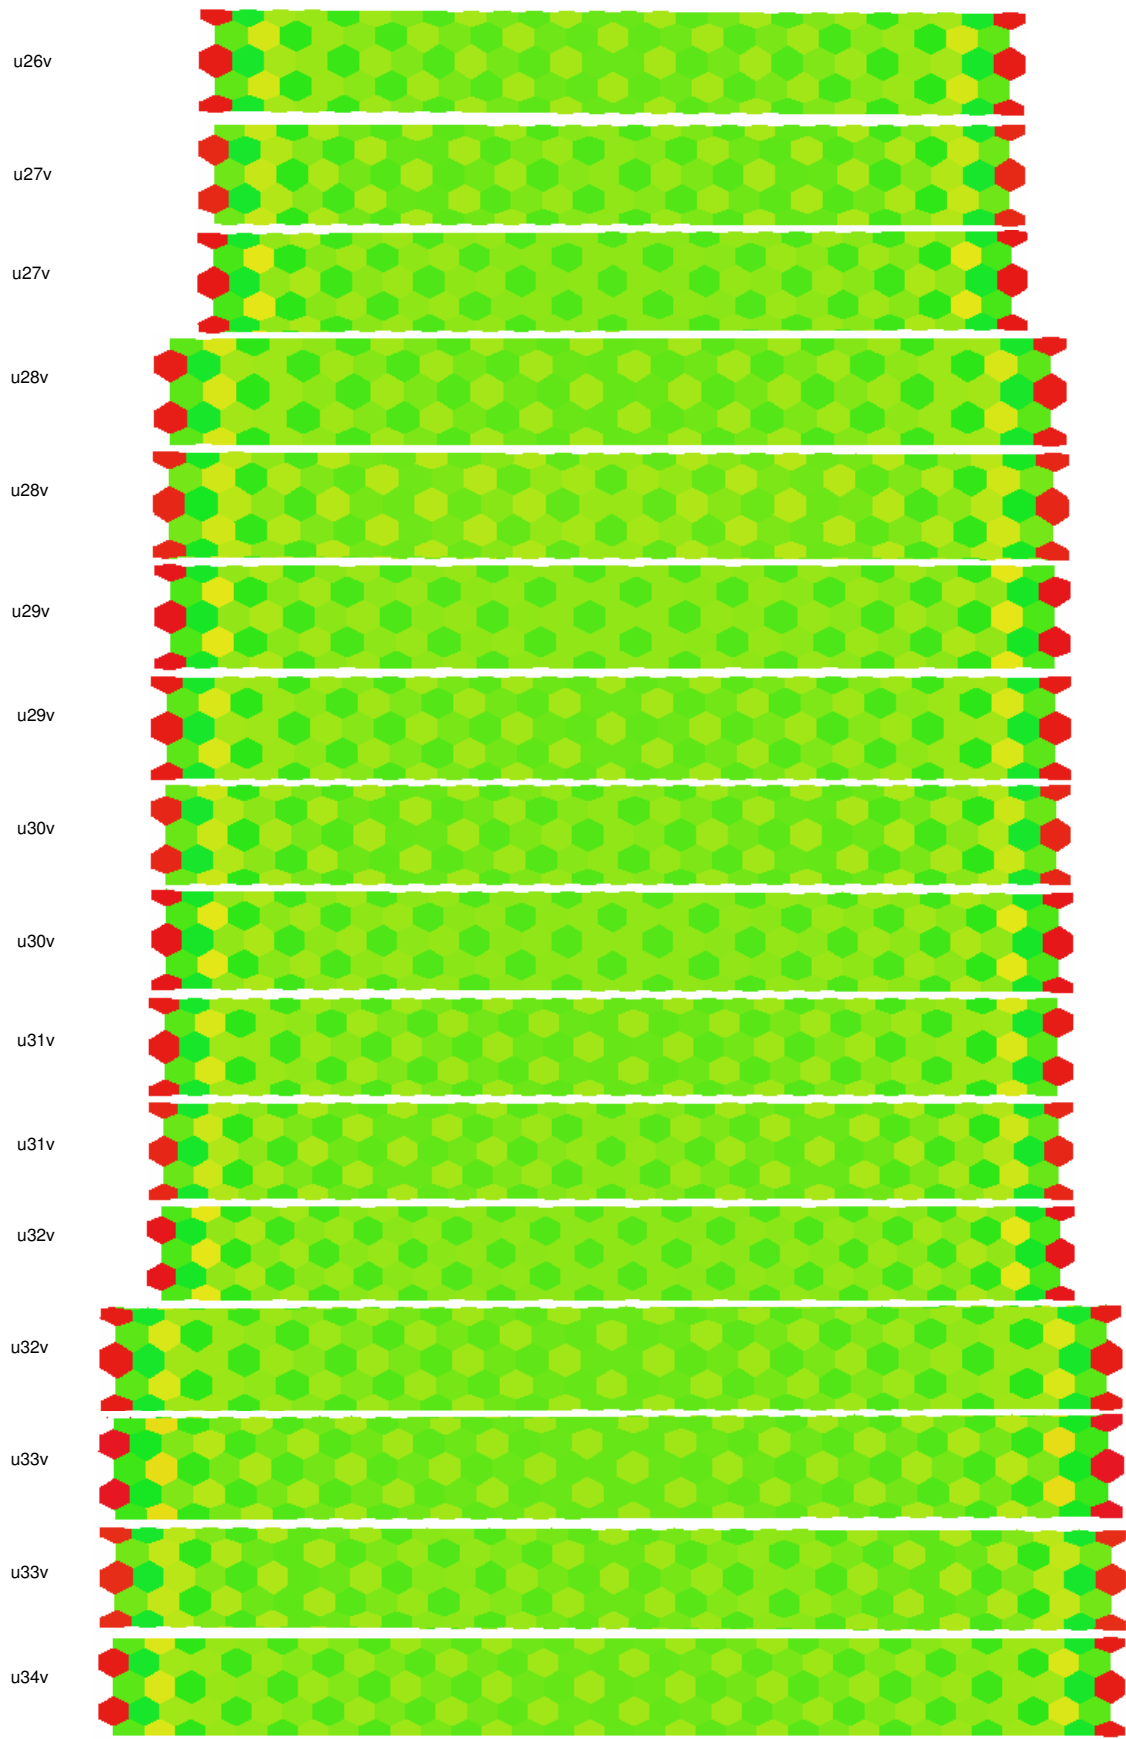

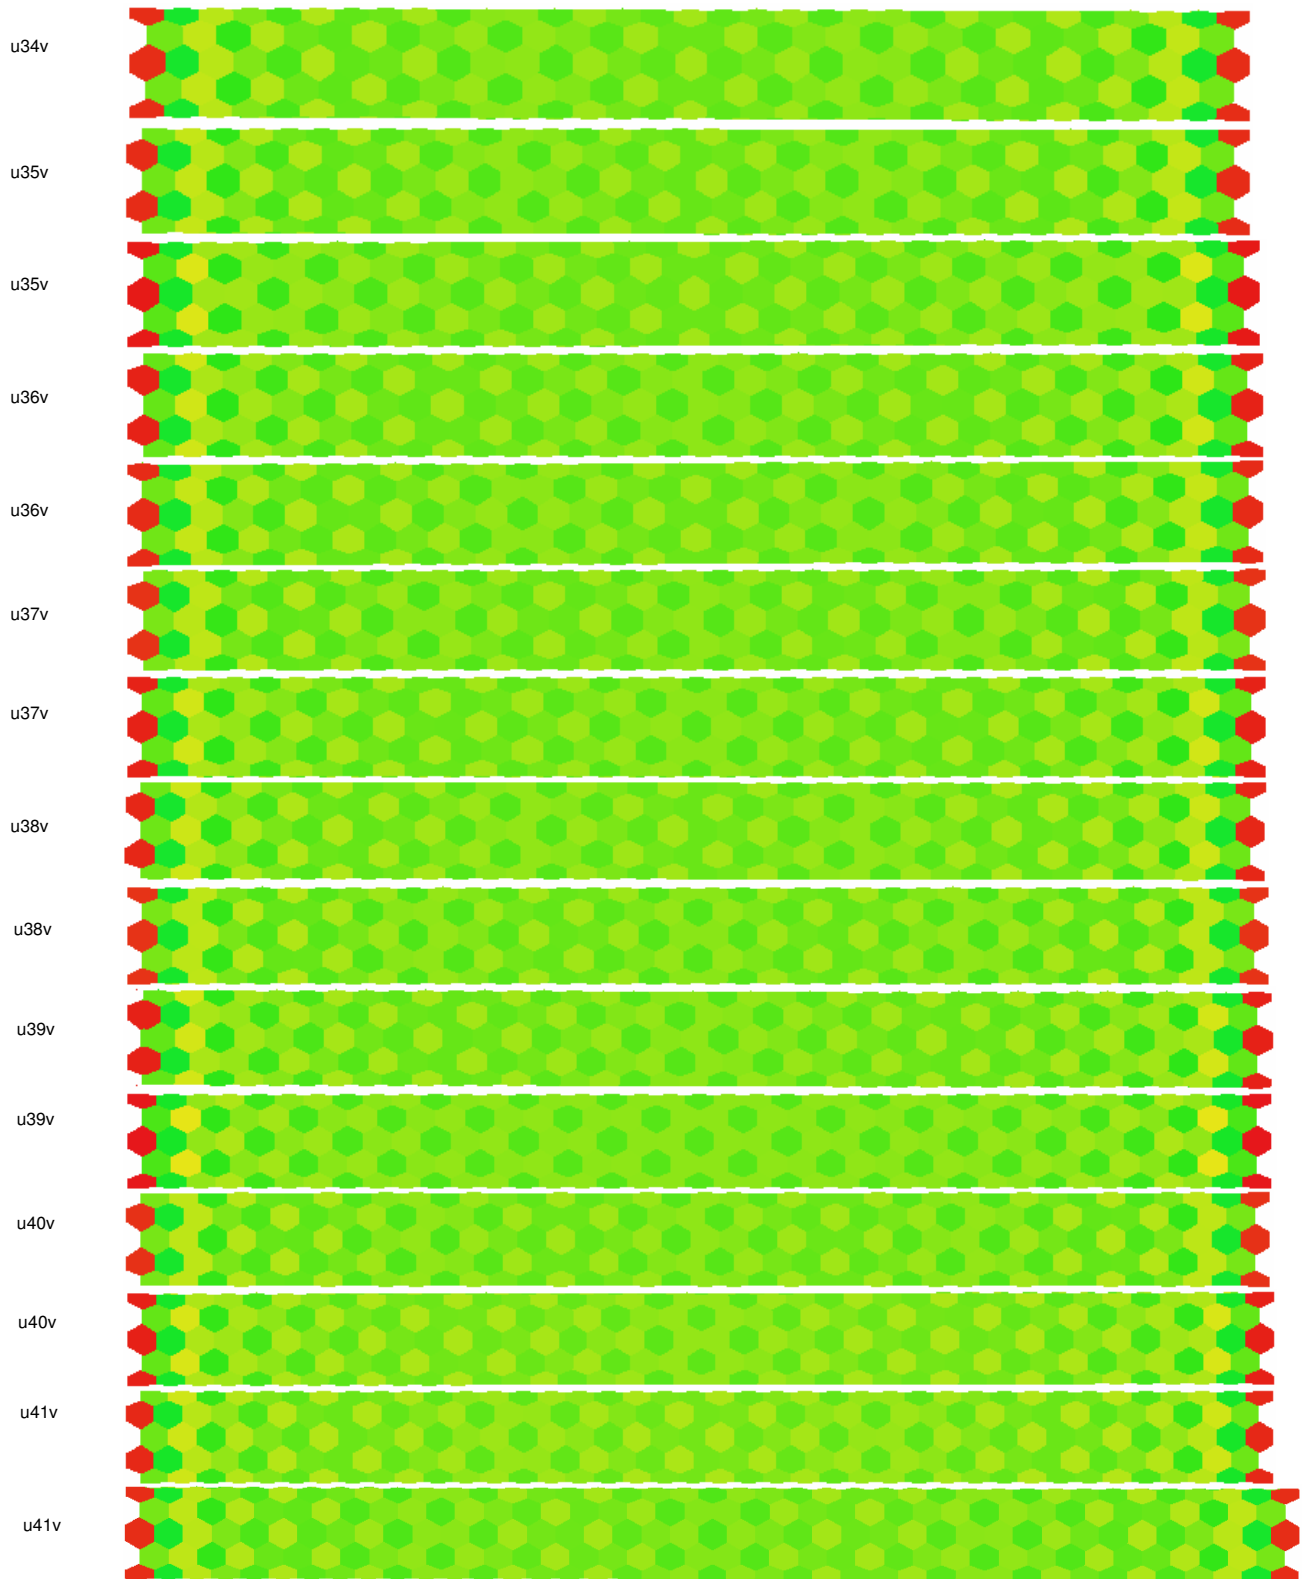

## I. TubeAnalyzer RBD and MBL plots for diameter increasing CNTs:

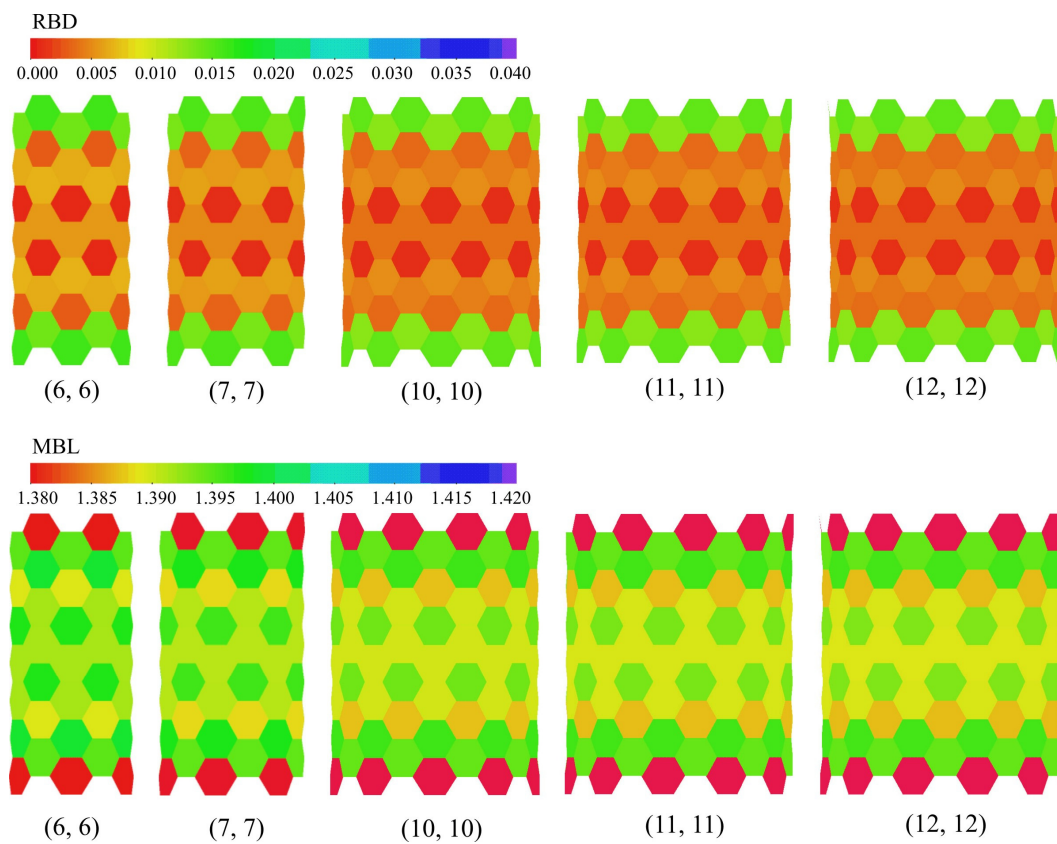

## II. Optimized CNTs geometries and Total Calculated Energies (B3LYP/STO-3G):

Nanotube (6,6) u05v6s  
B3LYP/STO-3G Energy: -4983.433839

|   |              |              |              |
|---|--------------|--------------|--------------|
| C | -3.463242720 | 2.487988130  | -6.225240610 |
| C | -2.487988130 | 3.463242720  | -6.225240610 |
| C | 0.423039560  | 4.243250240  | -6.225240610 |
| C | 1.755262110  | 3.886282280  | -6.225240610 |
| C | 3.886282280  | 1.755262110  | -6.225240610 |
| C | 4.243250240  | 0.423039560  | -6.225240610 |
| C | 3.463242720  | -2.487988130 | -6.225240610 |
| C | 2.487988130  | -3.463242720 | -6.225240610 |
| C | -0.423039560 | -4.243250240 | -6.225240610 |
| C | -1.755262110 | -3.886282280 | -6.225240610 |
| C | -3.886282280 | -1.755262110 | -6.225240610 |
| C | -4.243250240 | -0.423039560 | -6.225240610 |
| C | -1.776994790 | 3.809426990  | -5.005137710 |
| C | -0.365790860 | 4.187557940  | -5.005137710 |
| C | 2.410563150  | 3.443636120  | -5.005137710 |
| C | 3.443636120  | 2.410563150  | -5.005137710 |
| C | 4.187557940  | -0.365790860 | -5.005137710 |
| C | 3.809426990  | -1.776994790 | -5.005137710 |
| C | 1.776994790  | -3.809426990 | -5.005137710 |
| C | 0.365790860  | -4.187557940 | -5.005137710 |
| C | -2.410563150 | -3.443636120 | -5.005137710 |
| C | -3.443636120 | -2.410563150 | -5.005137710 |
| C | -4.187557940 | 0.365790860  | -5.005137710 |
| C | -3.809426990 | 1.776994790  | -5.005137710 |
| C | 0.358195310  | 4.145473630  | -3.763545780 |
| C | 1.762530580  | 3.769183120  | -3.763545780 |
| C | 3.769183120  | 1.762530580  | -3.763545780 |
| C | 4.145473630  | 0.358195310  | -3.763545780 |
| C | 3.410987820  | -2.382943050 | -3.763545780 |
| C | 2.382943050  | -3.410987820 | -3.763545780 |
| C | -0.358195310 | -4.145473630 | -3.763545780 |
| C | -1.762530580 | -3.769183120 | -3.763545780 |
| C | -3.769183120 | -1.762530580 | -3.763545780 |
| C | -4.145473630 | -0.358195310 | -3.763545780 |
| C | -3.410987820 | 2.382943050  | -3.763545780 |
| C | -2.382943050 | 3.410987820  | -3.763545780 |
| C | 2.383264470  | 3.393157960  | -2.505401370 |
| C | 3.393157960  | 2.383264470  | -2.505401370 |
| C | 4.130193230  | -0.367388600 | -2.505401370 |
| C | 3.760546560  | -1.746928750 | -2.505401370 |
| C | 1.746928750  | -3.760546560 | -2.505401370 |
| C | 0.367388600  | -4.130193230 | -2.505401370 |
| C | -2.383264470 | -3.393157960 | -2.505401370 |
| C | -3.393157960 | -2.383264470 | -2.505401370 |
| C | -4.130193230 | 0.367388600  | -2.505401370 |
| C | -3.760546560 | 1.746928750  | -2.505401370 |
| C | -1.746928750 | 3.760546560  | -2.505401370 |
| C | -0.367388600 | 4.130193230  | -2.505401370 |
| C | 3.771475750  | 1.754914270  | -1.246772190 |
| C | 4.143650940  | 0.365937540  | -1.246772190 |
| C | 3.405538210  | -2.388736680 | -1.246772190 |
| C | 2.388736680  | -3.405538210 | -1.246772190 |
| C | -0.365937540 | -4.143650940 | -1.246772190 |
| C | -1.754914270 | -3.771475750 | -1.246772190 |
| C | -3.771475750 | -1.754914270 | -1.246772190 |
| C | -4.143650940 | -0.365937540 | -1.246772190 |
| C | -3.405538210 | 2.388736680  | -1.246772190 |
| C | -2.388736680 | 3.405538210  | -1.246772190 |
| C | 0.365937540  | 4.143650940  | -1.246772190 |
| C | 1.754914270  | 3.771475750  | -1.246772190 |
| C | 4.156101610  | -0.362088670 | 0.000000000  |



|   |              |              |             |
|---|--------------|--------------|-------------|
| C | 3.780333910  | -1.764472810 | 0.000000000 |
| C | 1.764472810  | -3.780333910 | 0.000000000 |
| C | 0.362088670  | -4.156101610 | 0.000000000 |
| C | -2.391628790 | -3.418245240 | 0.000000000 |
| C | -3.418245240 | -2.391628790 | 0.000000000 |
| C | -4.156101610 | 0.362088670  | 0.000000000 |
| C | -3.780333910 | 1.764472810  | 0.000000000 |
| C | -1.764472810 | 3.780333910  | 0.000000000 |
| C | -0.362088670 | 4.156101610  | 0.000000000 |
| C | 2.391628790  | 3.418245240  | 0.000000000 |
| C | 3.418245240  | 2.391628790  | 0.000000000 |
| C | 3.405538210  | -2.388736680 | 1.246772190 |
| C | 2.388736680  | -3.405538210 | 1.246772190 |
| C | -0.365937540 | -4.143650940 | 1.246772190 |
| C | -1.754914270 | -3.771475750 | 1.246772190 |
| C | -3.771475750 | -1.754914270 | 1.246772190 |
| C | -4.143650940 | -0.365937540 | 1.246772190 |
| C | -3.405538210 | 2.388736680  | 1.246772190 |
| C | -2.388736680 | 3.405538210  | 1.246772190 |
| C | 0.365937540  | 4.143650940  | 1.246772190 |
| C | 1.754914270  | 3.771475750  | 1.246772190 |
| C | 3.771475750  | 1.754914270  | 1.246772190 |
| C | 4.143650940  | 0.365937540  | 1.246772190 |
| C | 1.746928750  | -3.760546560 | 2.505401370 |
| C | 0.367388600  | -4.130193230 | 2.505401370 |
| C | -2.383264470 | -3.393157960 | 2.505401370 |
| C | -3.393157960 | -2.383264470 | 2.505401370 |
| C | -4.130193230 | 0.367388600  | 2.505401370 |
| C | -3.760546560 | 1.746928750  | 2.505401370 |
| C | -1.746928750 | 3.760546560  | 2.505401370 |
| C | -0.367388600 | 4.130193230  | 2.505401370 |
| C | 2.383264470  | 3.393157960  | 2.505401370 |
| C | 3.393157960  | 2.383264470  | 2.505401370 |
| C | 4.130193230  | -0.367388600 | 2.505401370 |
| C | 3.760546560  | -1.746928750 | 2.505401370 |
| C | -0.358195310 | -4.145473630 | 3.763545780 |
| C | -1.762530580 | -3.769183120 | 3.763545780 |
| C | -3.769183120 | -1.762530580 | 3.763545780 |
| C | -4.145473630 | -0.358195310 | 3.763545780 |
| C | -3.410987820 | 2.382943050  | 3.763545780 |
| C | -2.382943050 | 3.410987820  | 3.763545780 |
| C | 0.358195310  | 4.145473630  | 3.763545780 |
| C | 1.762530580  | 3.769183120  | 3.763545780 |
| C | 3.769183120  | 1.762530580  | 3.763545780 |
| C | 4.145473630  | 0.358195310  | 3.763545780 |
| C | 3.410987820  | -2.382943050 | 3.763545780 |
| C | 2.382943050  | -3.410987820 | 3.763545780 |
| C | -2.410563150 | -3.443636120 | 5.005137710 |
| C | -3.443636120 | -2.410563150 | 5.005137710 |
| C | -4.187557940 | 0.365790860  | 5.005137710 |
| C | -3.809426990 | 1.776994790  | 5.005137710 |
| C | -1.776994790 | 3.809426990  | 5.005137710 |
| C | -0.365790860 | 4.187557940  | 5.005137710 |
| C | 2.410563150  | 3.443636120  | 5.005137710 |
| C | 3.443636120  | 2.410563150  | 5.005137710 |
| C | 4.187557940  | -0.365790860 | 5.005137710 |
| C | 3.809426990  | -1.776994790 | 5.005137710 |
| C | 1.776994790  | -3.809426990 | 5.005137710 |
| C | 0.365790860  | -4.187557940 | 5.005137710 |
| C | -3.886282280 | -1.755262110 | 6.225240610 |
| C | -4.243250240 | -0.423039560 | 6.225240610 |
| C | -3.463242720 | 2.487988130  | 6.225240610 |
| C | -2.487988130 | 3.463242720  | 6.225240610 |
| C | 0.423039560  | 4.243250240  | 6.225240610 |
| C | 1.755262110  | 3.886282280  | 6.225240610 |
| C | 3.886282280  | 1.755262110  | 6.225240610 |
| C | 4.243250240  | 0.423039560  | 6.225240610 |
| C | 3.463242720  | -2.487988130 | 6.225240610 |
| C | 2.487988130  | -3.463242720 | 6.225240610 |
| C | -0.423039560 | -4.243250240 | 6.225240610 |

|   |              |              |              |
|---|--------------|--------------|--------------|
| C | -1.755262110 | -3.886282280 | 6.225240610  |
| H | -3.895533520 | 2.160326070  | -7.179354400 |
| H | -2.160326070 | 3.895533520  | -7.179354400 |
| H | -0.076869510 | 4.453794020  | -7.179354400 |
| H | 2.293467960  | 3.818664010  | -7.179354400 |
| H | 3.818664010  | 2.293467960  | -7.179354400 |
| H | 4.453794020  | -0.076869510 | -7.179354400 |
| H | 3.895533520  | -2.160326070 | -7.179354400 |
| H | 2.160326070  | -3.895533520 | -7.179354400 |
| H | 0.076869510  | -4.453794020 | -7.179354400 |
| H | -2.293467960 | -3.818664010 | -7.179354400 |
| H | -3.818664010 | -2.293467960 | -7.179354400 |
| H | -4.453794020 | 0.076869510  | -7.179354400 |
| H | -3.818664010 | -2.293467960 | 7.179354400  |
| H | -4.453794020 | 0.076869510  | 7.179354400  |
| H | -3.895533520 | 2.160326070  | 7.179354400  |
| H | -2.160326070 | 3.895533520  | 7.179354400  |
| H | -0.076869510 | 4.453794020  | 7.179354400  |
| H | 2.293467960  | 3.818664010  | 7.179354400  |
| H | 3.818664010  | 2.293467960  | 7.179354400  |
| H | 4.453794020  | -0.076869510 | 7.179354400  |
| H | 3.895533520  | -2.160326070 | 7.179354400  |
| H | 2.160326070  | -3.895533520 | 7.179354400  |
| H | 0.076869510  | -4.453794020 | 7.179354400  |
| H | -2.293467960 | -3.818664010 | 7.179354400  |

Nanotube (6,6) u06v0s  
B3LYP/STO-3G Energy: -5435.207477

|   |              |              |             |
|---|--------------|--------------|-------------|
| H | -2.288459000 | -3.792341000 | 7.783333000 |
| C | -1.763549000 | -3.887482000 | 6.824554000 |
| H | 2.137931000  | -3.873130000 | 7.783983000 |
| C | 2.485191000  | -3.468073000 | 6.825179000 |
| H | 4.427636000  | -0.083304000 | 7.783224000 |
| C | 4.248600000  | 0.419074000  | 6.824368000 |
| H | 2.288459000  | 3.792341000  | 7.783333000 |
| C | 1.763549000  | 3.887482000  | 6.824554000 |
| H | -2.137931000 | 3.873130000  | 7.783983000 |
| C | -2.485191000 | 3.468073000  | 6.825179000 |
| H | -4.427636000 | 0.083304000  | 7.783224000 |
| C | -4.248600000 | -0.419074000 | 6.824368000 |
| C | -0.419645000 | -4.244933000 | 6.824694000 |
| C | 0.359380000  | -4.201144000 | 5.615869000 |
| C | 3.469117000  | -2.485341000 | 6.825060000 |
| C | 3.821438000  | -1.789616000 | 5.615943000 |
| C | 3.890570000  | 1.762823000  | 6.824231000 |
| C | 3.463922000  | 2.415883000  | 5.615319000 |
| C | 0.419645000  | 4.244933000  | 6.824694000 |
| C | -0.359380000 | 4.201144000  | 5.615869000 |
| C | -3.469117000 | 2.485341000  | 6.825060000 |
| C | -3.821438000 | 1.789616000  | 5.615943000 |
| C | -3.890570000 | -1.762823000 | 6.824231000 |
| C | -3.463922000 | -2.415883000 | 5.615319000 |
| C | 1.789219000  | -3.819928000 | 5.616095000 |
| C | 2.385715000  | -3.409725000 | 4.376575000 |
| C | 4.204000000  | -0.360148000 | 5.615626000 |
| C | 4.145443000  | 0.361222000  | 4.376009000 |
| C | 2.416893000  | 3.461689000  | 5.615488000 |
| C | 1.761963000  | 3.770523000  | 4.376108000 |
| C | -1.789219000 | 3.819928000  | 5.616095000 |
| C | -2.385715000 | 3.409725000  | 4.376575000 |
| C | -4.204000000 | 0.360148000  | 5.615626000 |
| C | -4.145443000 | -0.361222000 | 4.376009000 |
| C | -2.416893000 | -3.461689000 | 5.615488000 |
| C | -1.761963000 | -3.770523000 | 4.376108000 |
| C | 3.410424000  | -2.385702000 | 4.376494000 |
| C | 3.768979000  | -1.753909000 | 3.113020000 |
| C | 3.773259000  | 1.761271000  | 4.375905000 |

|   |              |              |              |
|---|--------------|--------------|--------------|
| C | 3.405724000  | 2.388160000  | 3.112515000  |
| C | 0.361987000  | 4.142719000  | 4.376257000  |
| C | -0.364897000 | 4.137594000  | 3.113027000  |
| C | -3.410424000 | 2.385702000  | 4.376494000  |
| C | -3.768979000 | 1.753909000  | 3.113020000  |
| C | -3.773259000 | -1.761271000 | 4.375905000  |
| C | -3.405724000 | -2.388160000 | 3.112515000  |
| C | -0.361987000 | -4.142719000 | 4.376257000  |
| C | 0.364897000  | -4.137594000 | 3.113027000  |
| C | 4.139559000  | -0.365606000 | 3.112760000  |
| C | 4.161405000  | 0.359956000  | 1.869429000  |
| C | 2.389048000  | 3.403803000  | 3.112607000  |
| C | 1.770355000  | 3.784147000  | 1.869452000  |
| C | -1.753601000 | 3.768168000  | 3.113190000  |
| C | -2.393687000 | 3.425236000  | 1.870024000  |
| C | -4.139559000 | 0.365606000  | 3.112760000  |
| C | -4.161405000 | -0.359956000 | 1.869429000  |
| C | -2.389048000 | -3.403803000 | 3.112607000  |
| C | -1.770355000 | -3.784147000 | 1.869452000  |
| C | 1.753601000  | -3.768168000 | 3.113190000  |
| C | 2.393687000  | -3.425236000 | 1.870024000  |
| C | 3.786248000  | 1.769769000  | 1.869268000  |
| C | 3.418693000  | 2.395856000  | 0.627773000  |
| C | 0.360641000  | 4.159460000  | 1.869683000  |
| C | -0.365570000 | 4.154248000  | 0.628333000  |
| C | -3.425567000 | 2.393812000  | 1.869934000  |
| C | -3.783233000 | 1.762300000  | 0.628359000  |
| C | -3.786248000 | -1.769769000 | 1.869268000  |
| C | -3.418693000 | -2.395856000 | 0.627773000  |
| C | -0.360641000 | -4.159460000 | 1.869683000  |
| C | 0.365570000  | -4.154248000 | 0.628333000  |
| C | 3.425567000  | -2.393812000 | 1.869934000  |
| C | 3.783233000  | -1.762300000 | 0.628359000  |
| C | 2.396566000  | 3.417243000  | 0.627850000  |
| C | 1.762052000  | 3.781969000  | -0.628372000 |
| C | -1.761963000 | 3.782923000  | 0.628524000  |
| C | -2.396463000 | 3.418371000  | -0.627773000 |
| C | -4.155503000 | 0.366235000  | 0.628097000  |
| C | -4.155445000 | -0.365299000 | -0.628319000 |
| C | -2.396566000 | -3.417243000 | 0.627850000  |
| C | -1.762052000 | -3.781969000 | -0.628372000 |
| C | 1.761963000  | -3.782923000 | 0.628524000  |
| C | 2.396463000  | -3.418371000 | -0.627773000 |
| C | 4.155503000  | -0.366235000 | 0.628097000  |
| C | 4.155445000  | 0.365299000  | -0.628319000 |
| C | 0.365956000  | 4.154158000  | -0.628111000 |
| C | -0.360232000 | 4.160163000  | -1.869469000 |
| C | -3.418312000 | 2.396710000  | -0.627839000 |
| C | -3.785454000 | 1.770612000  | -1.869407000 |
| C | -3.783563000 | -1.761538000 | -0.628522000 |
| C | -3.425567000 | -2.393064000 | -1.870030000 |
| C | -0.365956000 | -4.154158000 | -0.628111000 |
| C | 0.360232000  | -4.160163000 | -1.869469000 |
| C | 3.418312000  | -2.396710000 | -0.627839000 |
| C | 3.785454000  | -1.770612000 | -1.869407000 |
| C | 3.783563000  | 1.761538000  | -0.628522000 |
| C | 3.425567000  | 2.393064000  | -1.870030000 |
| C | -1.770206000 | 3.785590000  | -1.869285000 |
| C | -2.388836000 | 3.405372000  | -3.112512000 |
| C | -4.160852000 | 0.360930000  | -1.869634000 |
| C | -4.138895000 | -0.364595000 | -3.112962000 |
| C | -2.393656000 | -3.424461000 | -1.869967000 |
| C | -1.753641000 | -3.767595000 | -3.113089000 |
| C | 1.770206000  | -3.785590000 | -1.869285000 |
| C | 2.388836000  | -3.405372000 | -3.112512000 |
| C | 4.160852000  | -0.360930000 | -1.869634000 |
| C | 4.138895000  | 0.364595000  | -3.112962000 |
| C | 2.393656000  | 3.424461000  | -1.869967000 |
| C | 1.753641000  | 3.767595000  | -3.113089000 |
| C | -3.404970000 | 2.389196000  | -3.112553000 |

|   |              |              |              |
|---|--------------|--------------|--------------|
| C | -3.772015000 | 1.762251000  | -4.376009000 |
| C | -3.768873000 | -1.753129000 | -3.113170000 |
| C | -3.410117000 | -2.384978000 | -4.376593000 |
| C | -0.365298000 | -4.138091000 | -3.112835000 |
| C | 0.361562000  | -4.144028000 | -4.376091000 |
| C | 3.404970000  | -2.389196000 | -3.112553000 |
| C | 3.772015000  | -1.762251000 | -4.376009000 |
| C | 3.768873000  | 1.753129000  | -3.113170000 |
| C | 3.410117000  | 2.384978000  | -4.376593000 |
| C | 0.365298000  | 4.138091000  | -3.112835000 |
| C | -0.361562000 | 4.144028000  | -4.376091000 |
| C | -4.144302000 | 0.362315000  | -4.376152000 |
| C | -4.202716000 | -0.359020000 | -5.615758000 |
| C | -2.385547000 | -3.409148000 | -4.376560000 |
| C | -1.789299000 | -3.819817000 | -5.616053000 |
| C | 1.761795000  | -3.772498000 | -4.375944000 |
| C | 2.416660000  | -3.463471000 | -5.615319000 |
| C | 4.144302000  | -0.362315000 | -4.376152000 |
| C | 4.202716000  | 0.359020000  | -5.615758000 |
| C | 2.385547000  | 3.409148000  | -4.376560000 |
| C | 1.789299000  | 3.819817000  | -5.616053000 |
| C | -1.761795000 | 3.772498000  | -4.375944000 |
| C | -2.416660000 | 3.463471000  | -5.615319000 |
| C | -3.820728000 | -1.788645000 | -5.616069000 |
| C | -3.468412000 | -2.484262000 | -6.825214000 |
| C | -0.359789000 | -4.202266000 | -5.615748000 |
| C | 0.419423000  | -4.246874000 | -6.824491000 |
| C | 3.463104000  | -2.417086000 | -5.615395000 |
| C | 3.889451000  | -1.763955000 | -6.824395000 |
| C | 3.820728000  | 1.788645000  | -5.616069000 |
| C | 3.468412000  | 2.484262000  | -6.825214000 |
| C | 0.359789000  | 4.202266000  | -5.615748000 |
| C | -0.419423000 | 4.246874000  | -6.824491000 |
| C | -3.463104000 | 2.417086000  | -5.615395000 |
| C | -3.889451000 | 1.763955000  | -6.824395000 |
| C | -2.485118000 | -3.467631000 | -6.825155000 |
| H | -2.138320000 | -3.873007000 | -7.783951000 |
| C | 1.763358000  | -3.889520000 | -6.824300000 |
| H | 2.288380000  | -3.794330000 | -7.783003000 |
| C | 4.246999000  | -0.420086000 | -6.824526000 |
| H | 4.425623000  | 0.082485000  | -7.783338000 |
| C | 2.485118000  | 3.467631000  | -6.825155000 |
| H | 2.138320000  | 3.873007000  | -7.783951000 |
| C | -1.763358000 | 3.889520000  | -6.824300000 |
| H | -2.288380000 | 3.794330000  | -7.783003000 |
| C | -4.246999000 | 0.420086000  | -6.824526000 |
| H | -4.425623000 | -0.082485000 | -7.783338000 |
| H | 0.082986000  | -4.423212000 | 7.783542000  |
| H | 3.874811000  | -2.138795000 | 7.783811000  |
| H | 3.795312000  | 2.287810000  | 7.782945000  |
| H | -0.082986000 | 4.423212000  | 7.783542000  |
| H | -3.874811000 | 2.138795000  | 7.783811000  |
| H | -3.795312000 | -2.287810000 | 7.782945000  |
| H | -3.873611000 | -2.137108000 | -7.783997000 |
| H | -0.083021000 | -4.425477000 | -7.783395000 |
| H | 3.794568000  | -2.288955000 | -7.783148000 |
| H | 3.873611000  | 2.137108000  | -7.783997000 |
| H | 0.083021000  | 4.425477000  | -7.783395000 |
| H | -3.794568000 | 2.288955000  | -7.783148000 |

Nanotube (6,6) u06v6s  
B3LYP/STO-3G Energy: -5886.997143

|   |              |              |             |
|---|--------------|--------------|-------------|
| H | -1.226575000 | -4.273198000 | 8.421337000 |
| C | -0.692555000 | -4.213496000 | 7.464549000 |
| H | 3.087411000  | -3.198844000 | 8.421337000 |
| C | 3.302717000  | -2.706518000 | 7.464549000 |
| H | 4.313986000  | 1.074354000  | 8.421337000 |

|   |              |              |             |
|---|--------------|--------------|-------------|
| C | 3.995272000  | 1.506978000  | 7.464549000 |
| H | 1.226575000  | 4.273198000  | 8.421337000 |
| C | 0.692555000  | 4.213496000  | 7.464549000 |
| H | -3.087411000 | 3.198844000  | 8.421337000 |
| C | -3.302717000 | 2.706518000  | 7.464549000 |
| H | -4.313986000 | -1.074354000 | 8.421337000 |
| C | -3.995272000 | -1.506978000 | 7.464549000 |
| C | 0.692555000  | -4.213496000 | 7.464549000 |
| C | 1.437270000  | -3.962063000 | 6.250344000 |
| C | 3.995272000  | -1.506978000 | 7.464549000 |
| C | 4.149882000  | -0.736319000 | 6.250344000 |
| C | 3.302717000  | 2.706518000  | 7.464549000 |
| C | 2.712612000  | 3.225744000  | 6.250344000 |
| C | -0.692555000 | 4.213496000  | 7.464549000 |
| C | -1.437270000 | 3.962063000  | 6.250344000 |
| C | -3.995272000 | 1.506978000  | 7.464549000 |
| C | -4.149882000 | 0.736319000  | 6.250344000 |
| C | -3.302717000 | -2.706518000 | 7.464549000 |
| C | -2.712612000 | -3.225744000 | 6.250344000 |
| C | 2.712612000  | -3.225744000 | 6.250344000 |
| C | 3.186567000  | -2.678015000 | 5.010824000 |
| C | 4.149882000  | 0.736319000  | 6.250344000 |
| C | 3.912513000  | 1.420640000  | 5.010824000 |
| C | 1.437270000  | 3.962063000  | 6.250344000 |
| C | 0.725946000  | 4.098656000  | 5.010824000 |
| C | -2.712612000 | 3.225744000  | 6.250344000 |
| C | -3.186567000 | 2.678015000  | 5.010824000 |
| C | -4.149882000 | -0.736319000 | 6.250344000 |
| C | -3.912513000 | -1.420640000 | 5.010824000 |
| C | -1.437270000 | -3.962063000 | 6.250344000 |
| C | -0.725946000 | -4.098656000 | 5.010824000 |
| C | 3.912513000  | -1.420640000 | 5.010824000 |
| C | 4.087972000  | -0.715299000 | 3.748526000 |
| C | 3.186567000  | 2.678015000  | 5.010824000 |
| C | 2.663453000  | 3.182638000  | 3.748526000 |
| C | -0.725946000 | 4.098656000  | 5.010824000 |
| C | -1.424519000 | 3.897937000  | 3.748526000 |
| C | -3.912513000 | 1.420640000  | 5.010824000 |
| C | -4.087972000 | 0.715299000  | 3.748526000 |
| C | -3.186567000 | -2.678015000 | 5.010824000 |
| C | -2.663453000 | -3.182638000 | 3.748526000 |
| C | 0.725946000  | -4.098656000 | 5.010824000 |
| C | 1.424519000  | -3.897937000 | 3.748526000 |
| C | 4.087972000  | 0.715299000  | 3.748526000 |
| C | 3.918464000  | 1.424636000  | 2.495999000 |
| C | 1.424519000  | 3.897937000  | 3.748526000 |
| C | 0.725461000  | 4.105808000  | 2.495999000 |
| C | -2.663453000 | 3.182638000  | 3.748526000 |
| C | -3.193003000 | 2.681171000  | 2.495999000 |
| C | -4.087972000 | -0.715299000 | 3.748526000 |
| C | -3.918464000 | -1.424636000 | 2.495999000 |
| C | -1.424519000 | -3.897937000 | 3.748526000 |
| C | -0.725461000 | -4.105808000 | 2.495999000 |
| C | 2.663453000  | -3.182638000 | 3.748526000 |
| C | 3.193003000  | -2.681171000 | 2.495999000 |
| C | 3.193003000  | 2.681171000  | 2.495999000 |
| C | 2.682803000  | 3.196502000  | 1.254199000 |
| C | -0.725461000 | 4.105808000  | 2.495999000 |
| C | -1.426850000 | 3.921627000  | 1.254199000 |
| C | -3.918464000 | 1.424636000  | 2.495999000 |
| C | -4.109654000 | 0.725125000  | 1.254199000 |
| C | -3.193003000 | -2.681171000 | 2.495999000 |
| C | -2.682803000 | -3.196502000 | 1.254199000 |
| C | 0.725461000  | -4.105808000 | 2.495999000 |
| C | 1.426850000  | -3.921627000 | 1.254199000 |
| C | 3.918464000  | -1.424636000 | 2.495999000 |
| C | 4.109654000  | -0.725125000 | 1.254199000 |
| C | 1.426850000  | 3.921627000  | 1.254199000 |
| C | 0.718366000  | 4.103344000  | 0.000000000 |
| C | -2.682803000 | 3.196502000  | 1.254199000 |

|   |              |              |              |
|---|--------------|--------------|--------------|
| C | -3.194417000 | 2.673796000  | 0.000000000  |
| C | -4.109654000 | -0.725125000 | 1.254199000  |
| C | -3.912784000 | -1.429549000 | 0.000000000  |
| C | -1.426850000 | -3.921627000 | 1.254199000  |
| C | -0.718366000 | -4.103344000 | 0.000000000  |
| C | 2.682803000  | -3.196502000 | 1.254199000  |
| C | 3.194417000  | -2.673796000 | 0.000000000  |
| C | 4.109654000  | 0.725125000  | 1.254199000  |
| C | 3.912784000  | 1.429549000  | 0.000000000  |
| C | -0.718366000 | 4.103344000  | 0.000000000  |
| C | -1.426850000 | 3.921627000  | -1.254199000 |
| C | -3.912784000 | 1.429549000  | 0.000000000  |
| C | -4.109654000 | 0.725125000  | -1.254199000 |
| C | -3.194417000 | -2.673796000 | 0.000000000  |
| C | -2.682803000 | -3.196502000 | -1.254199000 |
| C | 0.718366000  | -4.103344000 | 0.000000000  |
| C | 1.426850000  | -3.921627000 | -1.254199000 |
| C | 3.912784000  | -1.429549000 | 0.000000000  |
| C | 4.109654000  | -0.725125000 | -1.254199000 |
| C | 3.194417000  | 2.673796000  | 0.000000000  |
| C | 2.682803000  | 3.196502000  | -1.254199000 |
| C | -2.682803000 | 3.196502000  | -1.254199000 |
| C | -3.193003000 | 2.681171000  | -2.495999000 |
| C | -4.109654000 | -0.725125000 | -1.254199000 |
| C | -3.918464000 | -1.424636000 | -2.495999000 |
| C | -1.426850000 | -3.921627000 | -1.254199000 |
| C | -0.725461000 | -4.105808000 | -2.495999000 |
| C | 2.682803000  | -3.196502000 | -1.254199000 |
| C | 3.193003000  | -2.681171000 | -2.495999000 |
| C | 4.109654000  | 0.725125000  | -1.254199000 |
| C | 3.918464000  | 1.424636000  | -2.495999000 |
| C | 1.426850000  | 3.921627000  | -1.254199000 |
| C | 0.725461000  | 4.105808000  | -2.495999000 |
| C | -3.918464000 | 1.424636000  | -2.495999000 |
| C | -4.087972000 | 0.715299000  | -3.748526000 |
| C | -3.193003000 | -2.681171000 | -2.495999000 |
| C | -2.663453000 | -3.182638000 | -3.748526000 |
| C | 0.725461000  | -4.105808000 | -2.495999000 |
| C | 1.424519000  | -3.897937000 | -3.748526000 |
| C | 3.918464000  | -1.424636000 | -2.495999000 |
| C | 4.087972000  | -0.715299000 | -3.748526000 |
| C | 3.193003000  | 2.681171000  | -2.495999000 |
| C | 2.663453000  | 3.182638000  | -3.748526000 |
| C | -0.725461000 | 4.105808000  | -2.495999000 |
| C | -1.424519000 | 3.897937000  | -3.748526000 |
| C | -4.087972000 | -0.715299000 | -3.748526000 |
| C | -3.912513000 | -1.420640000 | -5.010824000 |
| C | -1.424519000 | -3.897937000 | -3.748526000 |
| C | -0.725946000 | -4.098656000 | -5.010824000 |
| C | 2.663453000  | -3.182638000 | -3.748526000 |
| C | 3.186567000  | -2.678015000 | -5.010824000 |
| C | 4.087972000  | 0.715299000  | -3.748526000 |
| C | 3.912513000  | 1.420640000  | -5.010824000 |
| C | 1.424519000  | 3.897937000  | -3.748526000 |
| C | 0.725946000  | 4.098656000  | -5.010824000 |
| C | -2.663453000 | 3.182638000  | -3.748526000 |
| C | -3.186567000 | 2.678015000  | -5.010824000 |
| C | -3.186567000 | -2.678015000 | -5.010824000 |
| C | -2.712612000 | -3.225744000 | -6.250344000 |
| C | 0.725946000  | -4.098656000 | -5.010824000 |
| C | 1.437270000  | -3.962063000 | -6.250344000 |
| C | 3.912513000  | -1.420640000 | -5.010824000 |
| C | 4.149882000  | -0.736319000 | -6.250344000 |
| C | 3.186567000  | 2.678015000  | -5.010824000 |
| C | 2.712612000  | 3.225744000  | -6.250344000 |
| C | -0.725946000 | 4.098656000  | -5.010824000 |
| C | -1.437270000 | 3.962063000  | -6.250344000 |
| C | -3.912513000 | 1.420640000  | -5.010824000 |
| C | -4.149882000 | 0.736319000  | -6.250344000 |
| C | -1.437270000 | -3.962063000 | -6.250344000 |

|   |              |              |              |
|---|--------------|--------------|--------------|
| C | -0.692555000 | -4.213496000 | -7.464549000 |
| C | 2.712612000  | -3.225744000 | -6.250344000 |
| C | 3.302717000  | -2.706518000 | -7.464549000 |
| C | 4.149882000  | 0.736319000  | -6.250344000 |
| C | 3.995272000  | 1.506978000  | -7.464549000 |
| C | 1.437270000  | 3.962063000  | -6.250344000 |
| C | 0.692555000  | 4.213496000  | -7.464549000 |
| C | -2.712612000 | 3.225744000  | -6.250344000 |
| C | -3.302717000 | 2.706518000  | -7.464549000 |
| C | -4.149882000 | -0.736319000 | -6.250344000 |
| C | -3.995272000 | -1.506978000 | -7.464549000 |
| C | 0.692555000  | -4.213496000 | -7.464549000 |
| H | 1.226575000  | -4.273198000 | -8.421337000 |
| C | 3.995272000  | -1.506978000 | -7.464549000 |
| H | 4.313986000  | -1.074354000 | -8.421337000 |
| C | 3.302717000  | 2.706518000  | -7.464549000 |
| H | 3.087411000  | 3.198844000  | -8.421337000 |
| C | -0.692555000 | 4.213496000  | -7.464549000 |
| H | -1.226575000 | 4.273198000  | -8.421337000 |
| C | -3.995272000 | 1.506978000  | -7.464549000 |
| H | -4.313986000 | 1.074354000  | -8.421337000 |
| C | -3.302717000 | -2.706518000 | -7.464549000 |
| H | -3.087411000 | -3.198844000 | -8.421337000 |
| H | 1.226575000  | -4.273198000 | 8.421337000  |
| H | 4.313986000  | -1.074354000 | 8.421337000  |
| H | 3.087411000  | 3.198844000  | 8.421337000  |
| H | -1.226575000 | 4.273198000  | 8.421337000  |
| H | -4.313986000 | 1.074354000  | 8.421337000  |
| H | -3.087411000 | -3.198844000 | 8.421337000  |
| H | -1.226575000 | -4.273198000 | -8.421337000 |
| H | 3.087411000  | -3.198844000 | -8.421337000 |
| H | 4.313986000  | 1.074354000  | -8.421337000 |
| H | 1.226575000  | 4.273198000  | -8.421337000 |
| H | -3.087411000 | 3.198844000  | -8.421337000 |
| H | -4.313986000 | -1.074354000 | -8.421337000 |

Nanotube (6,6) u07v0s  
B3LYP/STO-3G Energy: -6338.767157

|   |              |              |              |
|---|--------------|--------------|--------------|
| H | 3.885005000  | -2.145307000 | -9.055628000 |
| C | 3.457897000  | -2.476825000 | -8.100488000 |
| H | 0.069815000  | -4.444823000 | -9.054973000 |
| C | -0.429979000 | -4.240750000 | -8.099323000 |
| H | -3.837028000 | -2.304119000 | -9.050456000 |
| C | -3.902273000 | -1.765366000 | -8.096370000 |
| H | -3.885005000 | 2.145307000  | -9.055628000 |
| C | -3.457897000 | 2.476825000  | -8.100488000 |
| H | -0.069815000 | 4.444823000  | -9.054973000 |
| C | 0.429979000  | 4.240750000  | -8.099323000 |
| H | 3.837028000  | 2.304119000  | -9.050456000 |
| C | 3.902273000  | 1.765366000  | -8.096370000 |
| C | 2.479431000  | -3.451278000 | -8.101061000 |
| C | 1.772101000  | -3.800914000 | -6.882450000 |
| C | -1.765658000 | -3.890650000 | -8.097917000 |
| C | -2.421716000 | -3.452943000 | -6.878426000 |
| C | -4.255060000 | -0.430486000 | -8.097275000 |
| C | -4.194685000 | 0.359029000  | -6.879744000 |
| C | -2.479431000 | 3.451278000  | -8.101061000 |
| C | -1.772101000 | 3.800914000  | -6.882450000 |
| C | 1.765658000  | 3.890650000  | -8.097917000 |
| C | 2.421716000  | 3.452943000  | -6.878426000 |
| C | 4.255060000  | 0.430486000  | -8.097275000 |
| C | 4.194685000  | -0.359029000 | -6.879744000 |
| C | 0.358996000  | -4.183357000 | -6.881680000 |
| C | -0.363622000 | -4.142360000 | -5.639967000 |
| C | -3.459317000 | -2.419968000 | -6.877745000 |
| C | -3.779776000 | -1.768781000 | -5.637266000 |
| C | -3.809014000 | 1.771302000  | -6.881160000 |

|   |              |              |              |
|---|--------------|--------------|--------------|
| C | -3.407077000 | 2.376257000  | -5.640910000 |
| C | -0.358996000 | 4.183357000  | -6.881680000 |
| C | 0.363622000  | 4.142360000  | -5.639967000 |
| C | 3.459317000  | 2.419968000  | -6.877745000 |
| C | 3.779776000  | 1.768781000  | -5.637266000 |
| C | 3.809014000  | -1.771302000 | -6.881160000 |
| C | 3.407077000  | -2.376257000 | -5.640910000 |
| C | -1.769164000 | -3.772769000 | -5.638446000 |
| C | -2.389836000 | -3.397533000 | -4.378632000 |
| C | -4.151636000 | -0.363655000 | -5.638196000 |
| C | -4.132609000 | 0.363469000  | -4.379734000 |
| C | -2.377807000 | 3.402133000  | -5.641507000 |
| C | -1.742736000 | 3.753980000  | -4.382220000 |
| C | 1.769164000  | 3.772769000  | -5.638446000 |
| C | 2.389836000  | 3.397533000  | -4.378632000 |
| C | 4.151636000  | 0.363655000  | -5.638196000 |
| C | 4.132609000  | -0.363469000 | -4.379734000 |
| C | 2.377807000  | -3.402133000 | -5.641507000 |
| C | 1.742736000  | -3.753980000 | -4.382220000 |
| C | -3.401414000 | -2.388738000 | -4.378060000 |
| C | -3.777794000 | -1.760494000 | -3.120960000 |
| C | -3.758999000 | 1.742223000  | -4.381078000 |
| C | -3.405490000 | 2.384443000  | -3.124584000 |
| C | -0.363458000 | 4.125597000  | -4.381460000 |
| C | 0.367241000  | 4.143240000  | -3.123556000 |
| C | 3.401414000  | 2.388738000  | -4.378060000 |
| C | 3.777794000  | 1.760494000  | -3.120960000 |
| C | 3.758999000  | -1.742223000 | -4.381078000 |
| C | 3.405490000  | -2.384443000 | -3.124584000 |
| C | 0.363458000  | -4.125597000 | -4.381460000 |
| C | -0.367241000 | -4.143240000 | -3.123556000 |
| C | -4.148367000 | -0.367352000 | -3.121831000 |
| C | -4.156777000 | 0.360681000  | -1.877516000 |
| C | -2.385387000 | 3.402898000  | -3.125171000 |
| C | -1.762506000 | 3.777654000  | -1.880048000 |
| C | 1.760556000  | 3.773748000  | -3.122108000 |
| C | 2.394707000  | 3.420072000  | -1.876451000 |
| C | 4.148367000  | 0.367352000  | -3.121831000 |
| C | 4.156777000  | -0.360681000 | -1.877516000 |
| C | 2.385387000  | -3.402898000 | -3.125171000 |
| C | 1.762506000  | -3.777654000 | -1.880048000 |
| C | -1.760556000 | -3.773748000 | -3.122108000 |
| C | -2.394707000 | -3.420072000 | -1.876451000 |
| C | -3.779633000 | 1.762177000  | -1.878918000 |
| C | -3.408837000 | 2.391517000  | -0.630209000 |
| C | -0.360746000 | 4.153724000  | -1.879231000 |
| C | 0.367588000  | 4.147432000  | -0.629160000 |
| C | 3.421794000  | 2.394401000  | -1.875880000 |
| C | 3.777416000  | 1.757106000  | -0.626629000 |
| C | 3.779633000  | -1.762177000 | -1.878918000 |
| C | 3.408837000  | -2.391517000 | -0.630209000 |
| C | 0.360746000  | -4.153724000 | -1.879231000 |
| C | -0.367588000 | -4.147432000 | -0.629160000 |
| C | -3.421794000 | -2.394401000 | -1.875880000 |
| C | -3.777416000 | -1.757106000 | -0.626629000 |
| C | -2.391815000 | 3.408352000  | -0.630776000 |
| C | -1.757086000 | 3.777385000  | 0.626627000  |
| C | 1.756972000  | 3.776426000  | -0.627757000 |
| C | 2.391542000  | 3.408862000  | 0.630209000  |
| C | 4.148505000  | 0.367704000  | -0.627459000 |
| C | 4.147436000  | -0.367566000 | 0.629160000  |
| C | 2.391815000  | -3.408352000 | -0.630776000 |
| C | 1.757086000  | -3.777385000 | 0.626627000  |
| C | -1.756972000 | -3.776426000 | -0.627757000 |
| C | -2.391542000 | -3.408862000 | 0.630209000  |
| C | -4.148505000 | -0.367704000 | -0.627459000 |
| C | -4.147436000 | 0.367566000  | 0.629160000  |
| C | -0.367690000 | 4.148490000  | 0.627458000  |
| C | 0.360688000  | 4.156776000  | 1.877518000  |
| C | 3.408381000  | 2.391843000  | 0.630774000  |



|   |              |              |             |
|---|--------------|--------------|-------------|
| C | 3.777676000  | 1.762539000  | 1.880050000 |
| C | 3.776410000  | -1.756945000 | 0.627756000 |
| C | 3.420056000  | -2.394671000 | 1.876452000 |
| C | 0.367690000  | -4.148490000 | 0.627458000 |
| C | -0.360688000 | -4.156776000 | 1.877518000 |
| C | -3.408381000 | -2.391843000 | 0.630774000 |
| C | -3.777676000 | -1.762539000 | 1.880050000 |
| C | -3.776410000 | 1.756945000  | 0.627756000 |
| C | -3.420056000 | 2.394671000  | 1.876452000 |
| C | 1.762190000  | 3.779654000  | 1.878916000 |
| C | 2.384452000  | 3.405521000  | 3.124587000 |
| C | 4.153736000  | 0.360775000  | 1.879232000 |
| C | 4.143242000  | -0.367207000 | 3.123558000 |
| C | 2.394385000  | -3.421758000 | 1.875877000 |
| C | 1.760489000  | -3.777762000 | 3.120959000 |
| C | -1.762190000 | -3.779654000 | 1.878916000 |
| C | -2.384452000 | -3.405521000 | 3.124587000 |
| C | -4.153736000 | -0.360775000 | 1.879232000 |
| C | -4.143242000 | 0.367207000  | 3.123558000 |
| C | -2.394385000 | 3.421758000  | 1.875877000 |
| C | -1.760489000 | 3.777762000  | 3.120959000 |
| C | 3.402916000  | 2.385425000  | 3.125172000 |
| C | 3.753990000  | 1.742775000  | 4.382221000 |
| C | 3.773741000  | -1.760518000 | 3.122106000 |
| C | 3.397529000  | -2.389797000 | 4.378632000 |
| C | 0.367353000  | -4.148357000 | 3.121829000 |
| C | -0.363458000 | -4.132606000 | 4.379738000 |
| C | -3.402916000 | -2.385425000 | 3.125172000 |
| C | -3.753990000 | -1.742775000 | 4.382221000 |
| C | -3.773741000 | 1.760518000  | 3.122106000 |
| C | -3.397529000 | 2.389797000  | 4.378632000 |
| C | -0.367353000 | 4.148357000  | 3.121829000 |
| C | 0.363458000  | 4.132606000  | 4.379738000 |
| C | 4.125604000  | 0.363496000  | 4.381460000 |
| C | 4.142366000  | -0.363583000 | 5.639967000 |
| C | 2.388740000  | -3.401377000 | 4.378052000 |
| C | 1.768798000  | -3.779743000 | 5.637265000 |
| C | -1.742216000 | -3.759019000 | 4.381079000 |
| C | -2.376249000 | -3.407102000 | 5.640914000 |
| C | -4.125604000 | -0.363496000 | 4.381460000 |
| C | -4.142366000 | 0.363583000  | 5.639967000 |
| C | -2.388740000 | 3.401377000  | 4.378052000 |
| C | -1.768798000 | 3.779743000  | 5.637265000 |
| C | 1.742216000  | 3.759019000  | 4.381079000 |
| C | 2.376249000  | 3.407102000  | 5.640914000 |
| C | 3.772780000  | -1.769125000 | 5.638444000 |
| C | 3.452966000  | -2.421684000 | 6.878429000 |
| C | 0.363676000  | -4.151622000 | 5.638196000 |
| C | -0.358996000 | -4.194677000 | 6.879751000 |
| C | -3.402137000 | -2.377845000 | 5.641511000 |
| C | -3.800919000 | -1.772142000 | 6.882454000 |
| C | -3.772780000 | 1.769125000  | 5.638444000 |
| C | -3.452966000 | 2.421684000  | 6.878429000 |
| C | -0.363676000 | 4.151622000  | 5.638196000 |
| C | 0.358996000  | 4.194677000  | 6.879751000 |
| C | 3.402137000  | 2.377845000  | 5.641511000 |
| C | 3.800919000  | 1.772142000  | 6.882454000 |
| C | 2.419986000  | -3.459278000 | 6.877735000 |
| C | 1.765397000  | -3.902233000 | 8.096366000 |
| C | -1.771280000 | -3.809023000 | 6.881160000 |
| C | -2.476791000 | -3.457907000 | 8.100492000 |
| C | -4.183368000 | -0.359041000 | 6.881678000 |
| C | -4.240785000 | 0.429949000  | 8.099317000 |
| C | -2.419986000 | 3.459278000  | 6.877735000 |
| C | -1.765397000 | 3.902233000  | 8.096366000 |
| C | 1.771280000  | 3.809023000  | 6.881160000 |
| C | 2.476791000  | 3.457907000  | 8.100492000 |
| C | 4.183368000  | 0.359041000  | 6.881678000 |
| C | 4.240785000  | -0.429949000 | 8.099317000 |
| C | 0.430515000  | -4.255033000 | 8.097278000 |

|   |              |              |              |
|---|--------------|--------------|--------------|
| H | -0.068482000 | -4.463980000 | 9.052317000  |
| C | -3.451265000 | -2.479458000 | 8.101068000  |
| H | -3.876137000 | -2.146692000 | 9.056785000  |
| C | -3.890696000 | 1.765619000  | 8.097912000  |
| H | -3.822930000 | 2.303845000  | 9.052144000  |
| C | -0.430515000 | 4.255033000  | 8.097278000  |
| H | 0.068482000  | 4.463980000  | 9.052317000  |
| C | 3.451265000  | 2.479458000  | 8.101068000  |
| H | 3.876137000  | 2.146692000  | 9.056785000  |
| C | 3.890696000  | -1.765619000 | 8.097912000  |
| H | 3.822930000  | -2.303845000 | 9.052144000  |
| H | 2.146665000  | -3.876164000 | -9.056772000 |
| H | -2.303859000 | -3.822849000 | -9.052155000 |
| H | -4.464006000 | 0.068532000  | -9.052304000 |
| H | -2.146665000 | 3.876164000  | -9.056772000 |
| H | 2.303859000  | 3.822849000  | -9.052155000 |
| H | 4.464006000  | -0.068532000 | -9.052304000 |
| H | 2.304150000  | -3.836954000 | 9.050447000  |
| H | -2.145246000 | -3.884992000 | 9.055631000  |
| H | -4.444879000 | -0.069870000 | 9.054953000  |
| H | -2.304150000 | 3.836954000  | 9.050447000  |
| H | 2.145246000  | 3.884992000  | 9.055631000  |
| H | 4.444879000  | 0.069870000  | 9.054953000  |

Nanotube (6,6) u07v6s  
B3LYP/STO-3G Energy: -6790.539231

|   |             |             |             |
|---|-------------|-------------|-------------|
| C | -3.47371662 | 2.49069430  | -8.70592662 |
| C | -2.49069430 | 3.47371662  | -8.70592662 |
| C | 0.42014623  | 4.25367399  | -8.70592662 |
| C | 1.76297969  | 3.89386285  | -8.70592662 |
| C | 3.89386285  | 1.76297969  | -8.70592662 |
| C | 4.25367399  | 0.42014623  | -8.70592662 |
| C | 3.47371662  | -2.49069430 | -8.70592662 |
| C | 2.49069430  | -3.47371662 | -8.70592662 |
| C | -0.42014623 | -4.25367399 | -8.70592662 |
| C | -1.76297969 | -3.89386285 | -8.70592662 |
| C | -3.89386285 | -1.76297969 | -8.70592662 |
| C | -4.25367399 | -0.42014623 | -8.70592662 |
| C | -1.78982030 | 3.82239137  | -7.49703426 |
| C | -0.36116584 | 4.20519818  | -7.49703426 |
| C | 2.41537788  | 3.46122553  | -7.49703426 |
| C | 3.46122553  | 2.41537788  | -7.49703426 |
| C | 4.20519818  | -0.36116584 | -7.49703426 |
| C | 3.82239137  | -1.78982030 | -7.49703426 |
| C | 1.78982030  | -3.82239137 | -7.49703426 |
| C | 0.36116584  | -4.20519818 | -7.49703426 |
| C | -2.41537788 | -3.46122553 | -7.49703426 |
| C | -3.46122553 | -2.41537788 | -7.49703426 |
| C | -4.20519818 | 0.36116584  | -7.49703426 |
| C | -3.82239137 | 1.78982030  | -7.49703426 |
| C | 0.36067017  | 4.14561205  | -6.25672417 |
| C | 1.76045650  | 3.77054044  | -6.25672417 |
| C | 3.77054044  | 1.76045650  | -6.25672417 |
| C | 4.14561205  | 0.36067017  | -6.25672417 |
| C | 3.40987027  | -2.38515555 | -6.25672417 |
| C | 2.38515555  | -3.40987027 | -6.25672417 |
| C | -0.36067017 | -4.14561205 | -6.25672417 |
| C | -1.76045650 | -3.77054044 | -6.25672417 |
| C | -3.77054044 | -1.76045650 | -6.25672417 |
| C | -4.14561205 | -0.36067017 | -6.25672417 |
| C | -3.40987027 | 2.38515555  | -6.25672417 |
| C | -2.38515555 | 3.40987027  | -6.25672417 |
| C | 2.38602000  | 3.40150377  | -4.99232656 |
| C | 3.40150377  | 2.38602000  | -4.99232656 |
| C | 4.13879868  | -0.36560205 | -4.99232656 |
| C | 3.76710582  | -1.75277868 | -4.99232656 |
| C | 1.75277868  | -3.76710582 | -4.99232656 |

|   |             |             |             |
|---|-------------|-------------|-------------|
| C | 0.36560205  | -4.13879868 | -4.99232656 |
| C | -2.38602000 | -3.40150377 | -4.99232656 |
| C | -3.40150377 | -2.38602000 | -4.99232656 |
| C | -4.13879868 | 0.36560205  | -4.99232656 |
| C | -3.76710582 | 1.75277868  | -4.99232656 |
| C | -1.75277868 | 3.76710582  | -4.99232656 |
| C | -0.36560205 | 4.13879868  | -4.99232656 |
| C | 3.78192672  | 1.76764661  | -3.74631164 |
| C | 4.15906791  | 0.36013649  | -3.74631164 |
| C | 3.42179022  | -2.39142131 | -3.74631164 |
| C | 2.39142131  | -3.42179022 | -3.74631164 |
| C | -0.36013649 | -4.15906791 | -3.74631164 |
| C | -1.76764661 | -3.78192672 | -3.74631164 |
| C | -3.78192672 | -1.76764661 | -3.74631164 |
| C | -4.15906791 | -0.36013649 | -3.74631164 |
| C | -3.42179022 | 2.39142131  | -3.74631164 |
| C | -2.39142131 | 3.42179022  | -3.74631164 |
| C | 0.36013649  | 4.15906791  | -3.74631164 |
| C | 1.76764661  | 3.78192672  | -3.74631164 |
| C | 4.15532033  | -0.36497299 | -2.50262476 |
| C | 3.78109946  | -1.76158428 | -2.50262476 |
| C | 1.76158428  | -3.78109946 | -2.50262476 |
| C | 0.36497299  | -4.15532033 | -2.50262476 |
| C | -2.39373605 | -3.41612647 | -2.50262476 |
| C | -3.41612647 | -2.39373605 | -2.50262476 |
| C | -4.15532033 | 0.36497299  | -2.50262476 |
| C | -3.78109946 | 1.76158428  | -2.50262476 |
| C | -1.76158428 | 3.78109946  | -2.50262476 |
| C | -0.36497299 | 4.15532033  | -2.50262476 |
| C | 2.39373605  | 3.41612647  | -2.50262476 |
| C | 3.41612647  | 2.39373605  | -2.50262476 |
| C | 3.41621738  | -2.39486823 | -1.24530563 |
| C | 2.39486823  | -3.41621738 | -1.24530563 |
| C | -0.36590804 | -4.15596515 | -1.24530563 |
| C | -1.76109692 | -3.78212541 | -1.24530563 |
| C | -3.78212541 | -1.76109692 | -1.24530563 |
| C | -4.15596515 | -0.36590804 | -1.24530563 |
| C | -3.41621738 | 2.39486823  | -1.24530563 |
| C | -2.39486823 | 3.41621738  | -1.24530563 |
| C | 0.36590804  | 4.15596515  | -1.24530563 |
| C | 1.76109692  | 3.78212541  | -1.24530563 |
| C | 3.78212541  | 1.76109692  | -1.24530563 |
| C | 4.15596515  | 0.36590804  | -1.24530563 |
| C | 1.76981361  | -3.78842655 | 0.00000000  |
| C | 0.36150972  | -4.16578044 | 0.00000000  |
| C | -2.39596682 | -3.42691682 | 0.00000000  |
| C | -3.42691682 | -2.39596682 | 0.00000000  |
| C | -4.16578044 | 0.36150972  | 0.00000000  |
| C | -3.78842655 | 1.76981361  | 0.00000000  |
| C | -1.76981361 | 3.78842655  | 0.00000000  |
| C | -0.36150972 | 4.16578044  | 0.00000000  |
| C | 2.39596682  | 3.42691682  | 0.00000000  |
| C | 3.42691682  | 2.39596682  | 0.00000000  |
| C | 4.16578044  | -0.36150972 | 0.00000000  |
| C | 3.78842655  | -1.76981361 | 0.00000000  |
| C | -0.36590804 | -4.15596515 | 1.24530563  |
| C | -1.76109692 | -3.78212541 | 1.24530563  |
| C | -3.78212541 | -1.76109692 | 1.24530563  |
| C | -4.15596515 | -0.36590804 | 1.24530563  |
| C | -3.41621738 | 2.39486823  | 1.24530563  |
| C | -2.39486823 | 3.41621738  | 1.24530563  |
| C | 0.36590804  | 4.15596515  | 1.24530563  |
| C | 1.76109692  | 3.78212541  | 1.24530563  |
| C | 3.78212541  | 1.76109692  | 1.24530563  |
| C | 4.15596515  | 0.36590804  | 1.24530563  |
| C | 3.41621738  | -2.39486823 | 1.24530563  |
| C | 2.39486823  | -3.41621738 | 1.24530563  |
| C | -2.39373605 | -3.41612647 | 2.50262476  |
| C | -3.41612647 | -2.39373605 | 2.50262476  |
| C | -4.15532033 | 0.36497299  | 2.50262476  |

|   |             |             |             |
|---|-------------|-------------|-------------|
| C | -3.78109946 | 1.76158428  | 2.50262476  |
| C | -1.76158428 | 3.78109946  | 2.50262476  |
| C | -0.36497299 | 4.15532033  | 2.50262476  |
| C | 2.39373605  | 3.41612647  | 2.50262476  |
| C | 3.41612647  | 2.39373605  | 2.50262476  |
| C | 4.15532033  | -0.36497299 | 2.50262476  |
| C | 3.78109946  | -1.76158428 | 2.50262476  |
| C | 1.76158428  | -3.78109946 | 2.50262476  |
| C | 0.36497299  | -4.15532033 | 2.50262476  |
| C | -3.78192672 | -1.76764661 | 3.74631164  |
| C | -4.15906791 | -0.36013649 | 3.74631164  |
| C | -3.42179022 | 2.39142131  | 3.74631164  |
| C | -2.39142131 | 3.42179022  | 3.74631164  |
| C | 0.36013649  | 4.15906791  | 3.74631164  |
| C | 1.76764661  | 3.78192672  | 3.74631164  |
| C | 3.78192672  | 1.76764661  | 3.74631164  |
| C | 4.15906791  | 0.36013649  | 3.74631164  |
| C | 3.42179022  | -2.39142131 | 3.74631164  |
| C | 2.39142131  | -3.42179022 | 3.74631164  |
| C | -0.36013649 | -4.15906791 | 3.74631164  |
| C | -1.76764661 | -3.78192672 | 3.74631164  |
| C | -4.13879868 | 0.36560205  | 4.99232656  |
| C | -3.76710582 | 1.75277868  | 4.99232656  |
| C | -1.75277868 | 3.76710582  | 4.99232656  |
| C | -0.36560205 | 4.13879868  | 4.99232656  |
| C | 2.38602000  | 3.40150377  | 4.99232656  |
| C | 3.40150377  | 2.38602000  | 4.99232656  |
| C | 4.13879868  | -0.36560205 | 4.99232656  |
| C | 3.76710582  | -1.75277868 | 4.99232656  |
| C | 1.75277868  | -3.76710582 | 4.99232656  |
| C | 0.36560205  | -4.13879868 | 4.99232656  |
| C | -2.38602000 | -3.40150377 | 4.99232656  |
| C | -3.40150377 | -2.38602000 | 4.99232656  |
| C | -3.40987027 | 2.38515555  | 6.25672417  |
| C | -2.38515555 | 3.40987027  | 6.25672417  |
| C | 0.36067017  | 4.14561205  | 6.25672417  |
| C | 1.76045650  | 3.77054044  | 6.25672417  |
| C | 3.77054044  | 1.76045650  | 6.25672417  |
| C | 4.14561205  | 0.36067017  | 6.25672417  |
| C | 3.40987027  | -2.38515555 | 6.25672417  |
| C | 2.38515555  | -3.40987027 | 6.25672417  |
| C | -0.36067017 | -4.14561205 | 6.25672417  |
| C | -1.76045650 | -3.77054044 | 6.25672417  |
| C | -3.77054044 | -1.76045650 | 6.25672417  |
| C | -4.14561205 | -0.36067017 | 6.25672417  |
| C | -1.78982030 | 3.82239137  | 7.49703426  |
| C | -0.36116584 | 4.20519818  | 7.49703426  |
| C | 2.41537788  | 3.46122553  | 7.49703426  |
| C | 3.46122553  | 2.41537788  | 7.49703426  |
| C | 4.20519818  | -0.36116584 | 7.49703426  |
| C | 3.82239137  | -1.78982030 | 7.49703426  |
| C | 1.78982030  | -3.82239137 | 7.49703426  |
| C | 0.36116584  | -4.20519818 | 7.49703426  |
| C | -2.41537788 | -3.46122553 | 7.49703426  |
| C | -3.46122553 | -2.41537788 | 7.49703426  |
| C | -4.20519818 | 0.36116584  | 7.49703426  |
| C | -3.82239137 | 1.78982030  | 7.49703426  |
| C | 0.42014623  | 4.25367399  | 8.70592662  |
| C | 1.76297969  | 3.89386285  | 8.70592662  |
| C | 3.89386285  | 1.76297969  | 8.70592662  |
| C | 4.25367399  | 0.42014623  | 8.70592662  |
| C | 3.47371662  | -2.49069430 | 8.70592662  |
| C | 2.49069430  | -3.47371662 | 8.70592662  |
| C | -0.42014623 | -4.25367399 | 8.70592662  |
| C | -1.76297969 | -3.89386285 | 8.70592662  |
| C | -3.89386285 | -1.76297969 | 8.70592662  |
| C | -4.25367399 | -0.42014623 | 8.70592662  |
| C | -3.47371662 | 2.49069430  | 8.70592662  |
| C | -2.49069430 | 3.47371662  | 8.70592662  |
| H | -3.88542343 | 2.15162843  | -9.66515970 |

|   |             |             |             |
|---|-------------|-------------|-------------|
| H | -2.15162843 | 3.88542343  | -9.66515970 |
| H | -0.07934684 | 4.44068960  | -9.66515970 |
| H | 2.28906118  | 3.80607659  | -9.66515970 |
| H | 3.80607659  | 2.28906118  | -9.66515970 |
| H | 4.44068960  | -0.07934684 | -9.66515970 |
| H | 3.88542343  | -2.15162843 | -9.66515970 |
| H | 2.15162843  | -3.88542343 | -9.66515970 |
| H | 0.07934684  | -4.44068960 | -9.66515970 |
| H | -2.28906118 | -3.80607659 | -9.66515970 |
| H | -3.80607659 | -2.28906118 | -9.66515970 |
| H | -4.44068960 | 0.07934684  | -9.66515970 |
| H | -0.07934684 | 4.44068960  | 9.66515970  |
| H | 2.28906118  | 3.80607659  | 9.66515970  |
| H | 3.80607659  | 2.28906118  | 9.66515970  |
| H | 4.44068960  | -0.07934684 | 9.66515970  |
| H | 3.88542343  | -2.15162843 | 9.66515970  |
| H | 2.15162843  | -3.88542343 | 9.66515970  |
| H | 0.07934684  | -4.44068960 | 9.66515970  |
| H | -2.28906118 | -3.80607659 | 9.66515970  |
| H | -3.80607659 | -2.28906118 | 9.66515970  |
| H | -4.44068960 | 0.07934684  | 9.66515970  |
| H | -3.88542343 | 2.15162843  | 9.66515970  |
| H | -2.15162843 | 3.88542343  | 9.66515970  |

Nanotube (6,6) u08v0\_  
B3LYP/STO-3G Energy: -7242.327223

|   |           |           |           |
|---|-----------|-----------|-----------|
| H | -3.198889 | -3.087359 | 10.296727 |
| C | -2.706573 | -3.302436 | 9.339583  |
| H | 1.074286  | -4.313999 | 10.296727 |
| C | 1.506707  | -3.995179 | 9.339583  |
| H | 4.273176  | -1.226640 | 10.296727 |
| C | 4.213280  | -0.692743 | 9.339583  |
| H | 3.198889  | 3.087359  | 10.296727 |
| C | 2.706573  | 3.302436  | 9.339583  |
| H | -1.074286 | 4.313999  | 10.296727 |
| C | -1.506707 | 3.995179  | 9.339583  |
| H | -4.273176 | 1.226640  | 10.296727 |
| C | -4.213280 | 0.692743  | 9.339583  |
| C | -1.506707 | -3.995179 | 9.339583  |
| C | -0.736316 | -4.149843 | 8.125684  |
| C | 2.706573  | -3.302436 | 9.339583  |
| C | 3.225712  | -2.712590 | 8.125684  |
| C | 4.213280  | 0.692743  | 9.339583  |
| C | 3.962028  | 1.437253  | 8.125684  |
| C | 1.506707  | 3.995179  | 9.339583  |
| C | 0.736316  | 4.149843  | 8.125684  |
| C | -2.706573 | 3.302436  | 9.339583  |
| C | -3.225712 | 2.712590  | 8.125684  |
| C | -4.213280 | -0.692743 | 9.339583  |
| C | -3.962028 | -1.437253 | 8.125684  |
| C | 0.736316  | -4.149843 | 8.125684  |
| C | 1.420496  | -3.911818 | 6.885921  |
| C | 3.962028  | -1.437253 | 8.125684  |
| C | 4.097982  | -0.725723 | 6.885921  |
| C | 3.225712  | 2.712590  | 8.125684  |
| C | 2.677486  | 3.186095  | 6.885921  |
| C | -0.736316 | 4.149843  | 8.125684  |
| C | -1.420496 | 3.911818  | 6.885921  |
| C | -3.962028 | 1.437253  | 8.125684  |
| C | -4.097982 | 0.725723  | 6.885921  |
| C | -3.225712 | -2.712590 | 8.125684  |
| C | -2.677486 | -3.186095 | 6.885921  |
| C | 2.677486  | -3.186095 | 6.885921  |
| C | 3.182574  | -2.663726 | 5.623387  |
| C | 4.097982  | 0.725723  | 6.885921  |
| C | 3.898141  | 1.424327  | 5.623387  |
| C | 1.420496  | 3.911818  | 6.885921  |

|   |           |           |           |
|---|-----------|-----------|-----------|
| C | 0.715567  | 4.088053  | 5.623387  |
| C | -2.677486 | 3.186095  | 6.885921  |
| C | -3.182574 | 2.663726  | 5.623387  |
| C | -4.097982 | -0.725723 | 6.885921  |
| C | -3.898141 | -1.424327 | 5.623387  |
| C | -1.420496 | -3.911818 | 6.885921  |
| C | -0.715567 | -4.088053 | 5.623387  |
| C | 3.898141  | -1.424327 | 5.623387  |
| C | 4.105692  | -0.725524 | 4.371435  |
| C | 3.182574  | 2.663726  | 5.623387  |
| C | 2.681168  | 3.192871  | 4.371435  |
| C | -0.715567 | 4.088053  | 5.623387  |
| C | -1.424524 | 3.918395  | 4.371435  |
| C | -3.898141 | 1.424327  | 5.623387  |
| C | -4.105692 | 0.725524  | 4.371435  |
| C | -3.182574 | -2.663726 | 5.623387  |
| C | -2.681168 | -3.192871 | 4.371435  |
| C | 0.715567  | -4.088053 | 5.623387  |
| C | 1.424524  | -3.918395 | 4.371435  |
| C | 4.105692  | 0.725524  | 4.371435  |
| C | 3.920346  | 1.426645  | 3.129086  |
| C | 1.424524  | 3.918395  | 4.371435  |
| C | 0.724662  | 4.108442  | 3.129086  |
| C | -2.681168 | 3.192871  | 4.371435  |
| C | -3.195684 | 2.681796  | 3.129086  |
| C | -4.105692 | -0.725524 | 4.371435  |
| C | -3.920346 | -1.426645 | 3.129086  |
| C | -1.424524 | -3.918395 | 4.371435  |
| C | -0.724662 | -4.108442 | 3.129086  |
| C | 2.681168  | -3.192871 | 4.371435  |
| C | 3.195684  | -2.681796 | 3.129086  |
| C | 3.195684  | 2.681796  | 3.129086  |
| C | 2.674301  | 3.194041  | 1.874515  |
| C | -0.724662 | 4.108442  | 3.129086  |
| C | -1.428970 | 3.913033  | 1.874515  |
| C | -3.920346 | 1.426645  | 3.129086  |
| C | -4.103271 | 0.718993  | 1.874515  |
| C | -3.195684 | -2.681796 | 3.129086  |
| C | -2.674301 | -3.194041 | 1.874515  |
| C | 0.724662  | -4.108442 | 3.129086  |
| C | 1.428970  | -3.913033 | 1.874515  |
| C | 3.920346  | -1.426645 | 3.129086  |
| C | 4.103271  | -0.718993 | 1.874515  |
| C | 1.428970  | 3.913033  | 1.874515  |
| C | 0.725314  | 4.110553  | 0.621622  |
| C | -2.674301 | 3.194041  | 1.874515  |
| C | -3.197186 | 2.683416  | 0.621622  |
| C | -4.103271 | -0.718993 | 1.874515  |
| C | -3.922500 | -1.427136 | 0.621622  |
| C | -1.428970 | -3.913033 | 1.874515  |
| C | -0.725314 | -4.110553 | 0.621622  |
| C | 2.674301  | -3.194041 | 1.874515  |
| C | 3.197186  | -2.683416 | 0.621622  |
| C | 4.103271  | 0.718993  | 1.874515  |
| C | 3.922500  | 1.427136  | 0.621622  |
| C | -0.725314 | 4.110553  | 0.621622  |
| C | -1.427136 | 3.922500  | -0.621622 |
| C | -3.922500 | 1.427136  | 0.621622  |
| C | -4.110553 | 0.725314  | -0.621622 |
| C | -3.197186 | -2.683416 | 0.621622  |
| C | -2.683416 | -3.197186 | -0.621622 |
| C | 0.725314  | -4.110553 | 0.621622  |
| C | 1.427136  | -3.922500 | -0.621622 |
| C | 3.922500  | -1.427136 | 0.621622  |
| C | 4.110553  | -0.725314 | -0.621622 |
| C | 3.197186  | 2.683416  | 0.621622  |
| C | 2.683416  | 3.197186  | -0.621622 |
| C | -2.683416 | 3.197186  | -0.621622 |
| C | -3.194041 | 2.674301  | -1.874515 |
| C | -4.110553 | -0.725314 | -0.621622 |

|   |           |           |           |
|---|-----------|-----------|-----------|
| C | -3.913033 | -1.428970 | -1.874515 |
| C | -1.427136 | -3.922500 | -0.621622 |
| C | -0.718993 | -4.103271 | -1.874515 |
| C | 2.683416  | -3.197186 | -0.621622 |
| C | 3.194041  | -2.674301 | -1.874515 |
| C | 4.110553  | 0.725314  | -0.621622 |
| C | 3.913033  | 1.428970  | -1.874515 |
| C | 1.427136  | 3.922500  | -0.621622 |
| C | 0.718993  | 4.103271  | -1.874515 |
| C | -3.913033 | 1.428970  | -1.874515 |
| C | -4.108442 | 0.724662  | -3.129086 |
| C | -3.194041 | -2.674301 | -1.874515 |
| C | -2.681796 | -3.195684 | -3.129086 |
| C | 0.718993  | -4.103271 | -1.874515 |
| C | 1.426645  | -3.920346 | -3.129086 |
| C | 3.913033  | -1.428970 | -1.874515 |
| C | 4.108442  | -0.724662 | -3.129086 |
| C | 3.194041  | 2.674301  | -1.874515 |
| C | 2.681796  | 3.195684  | -3.129086 |
| C | -0.718993 | 4.103271  | -1.874515 |
| C | -1.426645 | 3.920346  | -3.129086 |
| C | -4.108442 | -0.724662 | -3.129086 |
| C | -3.918395 | -1.424524 | -4.371435 |
| C | -1.426645 | -3.920346 | -3.129086 |
| C | -0.725524 | -4.105692 | -4.371435 |
| C | 2.681796  | -3.195684 | -3.129086 |
| C | 3.192871  | -2.681168 | -4.371435 |
| C | 4.108442  | 0.724662  | -3.129086 |
| C | 3.918395  | 1.424524  | -4.371435 |
| C | 1.426645  | 3.920346  | -3.129086 |
| C | 0.725524  | 4.105692  | -4.371435 |
| C | -2.681796 | 3.195684  | -3.129086 |
| C | -3.192871 | 2.681168  | -4.371435 |
| C | -3.192871 | -2.681168 | -4.371435 |
| C | -2.663726 | -3.182574 | -5.623387 |
| C | 0.725524  | -4.105692 | -4.371435 |
| C | 1.424327  | -3.898141 | -5.623387 |
| C | 3.918395  | -1.424524 | -4.371435 |
| C | 4.088053  | -0.715567 | -5.623387 |
| C | 3.192871  | 2.681168  | -4.371435 |
| C | 2.663726  | 3.182574  | -5.623387 |
| C | -0.725524 | 4.105692  | -4.371435 |
| C | -1.424327 | 3.898141  | -5.623387 |
| C | -3.918395 | 1.424524  | -4.371435 |
| C | -4.088053 | 0.715567  | -5.623387 |
| C | -1.424327 | -3.898141 | -5.623387 |
| C | -0.725723 | -4.097982 | -6.885921 |
| C | 2.663726  | -3.182574 | -5.623387 |
| C | 3.186095  | -2.677486 | -6.885921 |
| C | 4.088053  | 0.715567  | -5.623387 |
| C | 3.911818  | 1.420496  | -6.885921 |
| C | 1.424327  | 3.898141  | -5.623387 |
| C | 0.725723  | 4.097982  | -6.885921 |
| C | -2.663726 | 3.182574  | -5.623387 |
| C | -3.186095 | 2.677486  | -6.885921 |
| C | -4.088053 | -0.715567 | -5.623387 |
| C | -3.911818 | -1.420496 | -6.885921 |
| C | 0.725723  | -4.097982 | -6.885921 |
| C | 1.437253  | -3.962028 | -8.125684 |
| C | 3.911818  | -1.420496 | -6.885921 |
| C | 4.149843  | -0.736316 | -8.125684 |
| C | 3.186095  | 2.677486  | -6.885921 |
| C | 2.712590  | 3.225712  | -8.125684 |
| C | -0.725723 | 4.097982  | -6.885921 |
| C | -1.437253 | 3.962028  | -8.125684 |
| C | -3.911818 | 1.420496  | -6.885921 |
| C | -4.149843 | 0.736316  | -8.125684 |
| C | -3.186095 | -2.677486 | -6.885921 |
| C | -2.712590 | -3.225712 | -8.125684 |
| C | 2.712590  | -3.225712 | -8.125684 |

|   |           |           |            |
|---|-----------|-----------|------------|
| C | 3.302436  | -2.706573 | -9.339583  |
| C | 4.149843  | 0.736316  | -8.125684  |
| C | 3.995179  | 1.506707  | -9.339583  |
| C | 1.437253  | 3.962028  | -8.125684  |
| C | 0.692743  | 4.213280  | -9.339583  |
| C | -2.712590 | 3.225712  | -8.125684  |
| C | -3.302436 | 2.706573  | -9.339583  |
| C | -4.149843 | -0.736316 | -8.125684  |
| C | -3.995179 | -1.506707 | -9.339583  |
| C | -1.437253 | -3.962028 | -8.125684  |
| C | -0.692743 | -4.213280 | -9.339583  |
| C | 3.995179  | -1.506707 | -9.339583  |
| H | 4.313999  | -1.074286 | -10.296727 |
| C | 3.302436  | 2.706573  | -9.339583  |
| H | 3.087359  | 3.198889  | -10.296727 |
| C | -0.692743 | 4.213280  | -9.339583  |
| H | -1.226640 | 4.273176  | -10.296727 |
| C | -3.995179 | 1.506707  | -9.339583  |
| H | -4.313999 | 1.074286  | -10.296727 |
| C | -3.302436 | -2.706573 | -9.339583  |
| H | -3.087359 | -3.198889 | -10.296727 |
| C | 0.692743  | -4.213280 | -9.339583  |
| H | 1.226640  | -4.273176 | -10.296727 |
| H | -1.074286 | -4.313999 | 10.296727  |
| H | 3.198889  | -3.087359 | 10.296727  |
| H | 4.273176  | 1.226640  | 10.296727  |
| H | 1.074286  | 4.313999  | 10.296727  |
| H | -3.198889 | 3.087359  | 10.296727  |
| H | -4.273176 | -1.226640 | 10.296727  |
| H | 3.087359  | -3.198889 | -10.296727 |
| H | 4.313999  | 1.074286  | -10.296727 |
| H | 1.226640  | 4.273176  | -10.296727 |
| H | -3.087359 | 3.198889  | -10.296727 |
| H | -4.313999 | -1.074286 | -10.296727 |
| H | -1.226640 | -4.273176 | -10.296727 |

Nanotube (6,6) u08v6\_  
B3LYP/STO-3G Energy: -7694.100835

|   |              |              |              |
|---|--------------|--------------|--------------|
| C | -3.465306770 | 2.488321320  | -9.973558170 |
| C | -2.488321320 | 3.465306770  | -9.973558170 |
| C | 0.422296090  | 4.245204360  | -9.973558170 |
| C | 1.756883040  | 3.887602860  | -9.973558170 |
| C | 3.887602860  | 1.756883040  | -9.973558170 |
| C | 4.245204360  | 0.422296090  | -9.973558170 |
| C | 3.465306770  | -2.488321320 | -9.973558170 |
| C | 2.488321320  | -3.465306770 | -9.973558170 |
| C | -0.422296090 | -4.245204360 | -9.973558170 |
| C | -1.756883040 | -3.887602860 | -9.973558170 |
| C | -3.887602860 | -1.756883040 | -9.973558170 |
| C | -4.245204360 | -0.422296090 | -9.973558170 |
| C | -1.780457790 | 3.812859560  | -8.755783620 |
| C | -0.364508100 | 4.192262130  | -8.755783620 |
| C | 2.411804340  | 3.448351450  | -8.755783620 |
| C | 3.448351450  | 2.411804340  | -8.755783620 |
| C | 4.192262130  | -0.364508100 | -8.755783620 |
| C | 3.812859560  | -1.780457790 | -8.755783620 |
| C | 1.780457790  | -3.812859560 | -8.755783620 |
| C | 0.364508100  | -4.192262130 | -8.755783620 |
| C | -2.411804340 | -3.448351450 | -8.755783620 |
| C | -3.448351450 | -2.411804340 | -8.755783620 |
| C | -4.192262130 | 0.364508100  | -8.755783620 |
| C | -3.812859560 | 1.780457790  | -8.755783620 |
| C | 0.358816300  | 4.145836910  | -7.515199210 |
| C | 1.762174420  | 3.769808230  | -7.515199210 |
| C | 3.769808230  | 1.762174420  | -7.515199210 |
| C | 4.145836910  | 0.358816300  | -7.515199210 |
| C | 3.410991930  | -2.383662490 | -7.515199210 |



|   |              |              |              |
|---|--------------|--------------|--------------|
| C | 2.383662490  | -3.410991930 | -7.515199210 |
| C | -0.358816300 | -4.145836910 | -7.515199210 |
| C | -1.762174420 | -3.769808230 | -7.515199210 |
| C | -3.769808230 | -1.762174420 | -7.515199210 |
| C | -4.145836910 | -0.358816300 | -7.515199210 |
| C | -3.410991930 | 2.383662490  | -7.515199210 |
| C | -2.383662490 | 3.410991930  | -7.515199210 |
| C | 2.383596240  | 3.393966910  | -6.255171000 |
| C | 3.393966910  | 2.383596240  | -6.255171000 |
| C | 4.131059680  | -0.367271440 | -6.255171000 |
| C | 3.761238350  | -1.747463440 | -6.255171000 |
| C | 1.747463440  | -3.761238350 | -6.255171000 |
| C | 0.367271440  | -4.131059680 | -6.255171000 |
| C | -2.383596240 | -3.393966910 | -6.255171000 |
| C | -3.393966910 | -2.383596240 | -6.255171000 |
| C | -4.131059680 | 0.367271440  | -6.255171000 |
| C | -3.761238350 | 1.747463440  | -6.255171000 |
| C | -1.747463440 | 3.761238350  | -6.255171000 |
| C | -0.367271440 | 4.131059680  | -6.255171000 |
| C | 3.773456590  | 1.758400250  | -4.998956040 |
| C | 4.147109390  | 0.363909010  | -4.998956040 |
| C | 3.409547580  | -2.388709140 | -4.998956040 |
| C | 2.388709140  | -3.409547580 | -4.998956040 |
| C | -0.363909010 | -4.147109390 | -4.998956040 |
| C | -1.758400250 | -3.773456590 | -4.998956040 |
| C | -3.773456590 | -1.758400250 | -4.998956040 |
| C | -4.147109390 | -0.363909010 | -4.998956040 |
| C | -3.409547580 | 2.388709140  | -4.998956040 |
| C | -2.388709140 | 3.409547580  | -4.998956040 |
| C | 0.363909010  | 4.147109390  | -4.998956040 |
| C | 1.758400250  | 3.773456590  | -4.998956040 |
| C | 4.156314100  | -0.362591080 | -3.754653630 |
| C | 3.780769140  | -1.764143970 | -3.754653630 |
| C | 1.764143970  | -3.780769140 | -3.754653630 |
| C | 0.362591080  | -4.156314100 | -3.754653630 |
| C | -2.392170140 | -3.418178060 | -3.754653630 |
| C | -3.418178060 | -2.392170140 | -3.754653630 |
| C | -4.156314100 | 0.362591080  | -3.754653630 |
| C | -3.780769140 | 1.764143970  | -3.754653630 |
| C | -1.764143970 | 3.780769140  | -3.754653630 |
| C | -0.362591080 | 4.156314100  | -3.754653630 |
| C | 2.392170140  | 3.418178060  | -3.754653630 |
| C | 3.418178060  | 2.392170140  | -3.754653630 |
| C | 3.408667990  | -2.392093190 | -2.504001430 |
| C | 2.392093190  | -3.408667990 | -2.504001430 |
| C | -0.367279480 | -4.148039670 | -2.504001430 |
| C | -1.755946480 | -3.775947470 | -2.504001430 |
| C | -3.775947470 | -1.755946480 | -2.504001430 |
| C | -4.148039670 | -0.367279480 | -2.504001430 |
| C | -3.408667990 | 2.392093190  | -2.504001430 |
| C | -2.392093190 | 3.408667990  | -2.504001430 |
| C | 0.367279480  | 4.148039670  | -2.504001430 |
| C | 1.755946480  | 3.775947470  | -2.504001430 |
| C | 3.775947470  | 1.755946480  | -2.504001430 |
| C | 4.148039670  | 0.367279480  | -2.504001430 |
| C | 1.758430250  | -3.778002300 | -1.247326170 |
| C | 0.366155880  | -4.151061100 | -1.247326170 |
| C | -2.392630850 | -3.411846420 | -1.247326170 |
| C | -3.411846420 | -2.392630850 | -1.247326170 |
| C | -4.151061100 | 0.366155880  | -1.247326170 |
| C | -3.778002300 | 1.758430250  | -1.247326170 |
| C | -1.758430250 | 3.778002300  | -1.247326170 |
| C | -0.366155880 | 4.151061100  | -1.247326170 |
| C | 2.392630850  | 3.411846420  | -1.247326170 |
| C | 3.411846420  | 2.392630850  | -1.247326170 |
| C | 4.151061100  | -0.366155880 | -1.247326170 |
| C | 3.778002300  | -1.758430250 | -1.247326170 |
| C | -0.362836500 | -4.158966700 | 0.000000000  |
| C | -1.765257720 | -3.783189060 | 0.000000000  |
| C | -3.783189060 | -1.765257720 | 0.000000000  |

|   |              |              |             |
|---|--------------|--------------|-------------|
| C | -4.158966700 | -0.362836500 | 0.000000000 |
| C | -3.420352560 | 2.393708970  | 0.000000000 |
| C | -2.393708970 | 3.420352560  | 0.000000000 |
| C | 0.362836500  | 4.158966700  | 0.000000000 |
| C | 1.765257720  | 3.783189060  | 0.000000000 |
| C | 3.783189060  | 1.765257720  | 0.000000000 |
| C | 4.158966700  | 0.362836500  | 0.000000000 |
| C | 3.420352560  | -2.393708970 | 0.000000000 |
| C | 2.393708970  | -3.420352560 | 0.000000000 |
| C | -2.392630850 | -3.411846420 | 1.247326170 |
| C | -3.411846420 | -2.392630850 | 1.247326170 |
| C | -4.151061100 | 0.366155880  | 1.247326170 |
| C | -3.778002300 | 1.758430250  | 1.247326170 |
| C | -1.758430250 | 3.778002300  | 1.247326170 |
| C | -0.366155880 | 4.151061100  | 1.247326170 |
| C | 2.392630850  | 3.411846420  | 1.247326170 |
| C | 3.411846420  | 2.392630850  | 1.247326170 |
| C | 4.151061100  | -0.366155880 | 1.247326170 |
| C | 3.778002300  | -1.758430250 | 1.247326170 |
| C | 1.758430250  | -3.778002300 | 1.247326170 |
| C | 0.366155880  | -4.151061100 | 1.247326170 |
| C | -3.775947470 | -1.755946480 | 2.504001430 |
| C | -4.148039670 | -0.367279480 | 2.504001430 |
| C | -3.408667990 | 2.392093190  | 2.504001430 |
| C | -2.392093190 | 3.408667990  | 2.504001430 |
| C | 0.367279480  | 4.148039670  | 2.504001430 |
| C | 1.755946480  | 3.775947470  | 2.504001430 |
| C | 3.775947470  | 1.755946480  | 2.504001430 |
| C | 4.148039670  | 0.367279480  | 2.504001430 |
| C | 3.408667990  | -2.392093190 | 2.504001430 |
| C | 2.392093190  | -3.408667990 | 2.504001430 |
| C | -0.367279480 | -4.148039670 | 2.504001430 |
| C | -1.755946480 | -3.775947470 | 2.504001430 |
| C | -4.156314100 | 0.362591080  | 3.754653630 |
| C | -3.780769140 | 1.764143970  | 3.754653630 |
| C | -1.764143970 | 3.780769140  | 3.754653630 |
| C | -0.362591080 | 4.156314100  | 3.754653630 |
| C | 2.392170140  | 3.418178060  | 3.754653630 |
| C | 3.418178060  | 2.392170140  | 3.754653630 |
| C | 4.156314100  | -0.362591080 | 3.754653630 |
| C | 3.780769140  | -1.764143970 | 3.754653630 |
| C | 1.764143970  | -3.780769140 | 3.754653630 |
| C | 0.362591080  | -4.156314100 | 3.754653630 |
| C | -2.392170140 | -3.418178060 | 3.754653630 |
| C | -3.418178060 | -2.392170140 | 3.754653630 |
| C | -3.409547580 | 2.388709140  | 4.998956040 |
| C | -2.388709140 | 3.409547580  | 4.998956040 |
| C | 0.363909010  | 4.147109390  | 4.998956040 |
| C | 1.758400250  | 3.773456590  | 4.998956040 |
| C | 3.773456590  | 1.758400250  | 4.998956040 |
| C | 4.147109390  | 0.363909010  | 4.998956040 |
| C | 3.409547580  | -2.388709140 | 4.998956040 |
| C | 2.388709140  | -3.409547580 | 4.998956040 |
| C | -0.363909010 | -4.147109390 | 4.998956040 |
| C | -1.758400250 | -3.773456590 | 4.998956040 |
| C | -3.773456590 | -1.758400250 | 4.998956040 |
| C | -4.147109390 | -0.363909010 | 4.998956040 |
| C | -1.747463440 | 3.761238350  | 6.255171000 |
| C | -0.367271440 | 4.131059680  | 6.255171000 |
| C | 2.383596240  | 3.393966910  | 6.255171000 |
| C | 3.393966910  | 2.383596240  | 6.255171000 |
| C | 4.131059680  | -0.367271440 | 6.255171000 |
| C | 3.761238350  | -1.747463440 | 6.255171000 |
| C | 1.747463440  | -3.761238350 | 6.255171000 |
| C | 0.367271440  | -4.131059680 | 6.255171000 |
| C | -2.383596240 | -3.393966910 | 6.255171000 |
| C | -3.393966910 | -2.383596240 | 6.255171000 |
| C | -4.131059680 | 0.367271440  | 6.255171000 |
| C | -3.761238350 | 1.747463440  | 6.255171000 |
| C | 0.358816300  | 4.145836910  | 7.515199210 |

|   |              |              |               |
|---|--------------|--------------|---------------|
| C | 1.762174420  | 3.769808230  | 7.515199210   |
| C | 3.769808230  | 1.762174420  | 7.515199210   |
| C | 4.145836910  | 0.358816300  | 7.515199210   |
| C | 3.410991930  | -2.383662490 | 7.515199210   |
| C | 2.383662490  | -3.410991930 | 7.515199210   |
| C | -0.358816300 | -4.145836910 | 7.515199210   |
| C | -1.762174420 | -3.769808230 | 7.515199210   |
| C | -3.769808230 | -1.762174420 | 7.515199210   |
| C | -4.145836910 | -0.358816300 | 7.515199210   |
| C | -3.410991930 | 2.383662490  | 7.515199210   |
| C | -2.383662490 | 3.410991930  | 7.515199210   |
| C | 2.411804340  | 3.448351450  | 8.755783620   |
| C | 3.448351450  | 2.411804340  | 8.755783620   |
| C | 4.192262130  | -0.364508100 | 8.755783620   |
| C | 3.812859560  | -1.780457790 | 8.755783620   |
| C | 1.780457790  | -3.812859560 | 8.755783620   |
| C | 0.364508100  | -4.192262130 | 8.755783620   |
| C | -2.411804340 | -3.448351450 | 8.755783620   |
| C | -3.448351450 | -2.411804340 | 8.755783620   |
| C | -4.192262130 | 0.364508100  | 8.755783620   |
| C | -3.812859560 | 1.780457790  | 8.755783620   |
| C | -1.780457790 | 3.812859560  | 8.755783620   |
| C | -0.364508100 | 4.192262130  | 8.755783620   |
| C | 3.887602860  | 1.756883040  | 9.973558170   |
| C | 4.245204360  | 0.422296090  | 9.973558170   |
| C | 3.465306770  | -2.488321320 | 9.973558170   |
| C | 2.488321320  | -3.465306770 | 9.973558170   |
| C | -0.422296090 | -4.245204360 | 9.973558170   |
| C | -1.756883040 | -3.887602860 | 9.973558170   |
| C | -3.887602860 | -1.756883040 | 9.973558170   |
| C | -4.245204360 | -0.422296090 | 9.973558170   |
| C | -3.465306770 | 2.488321320  | 9.973558170   |
| C | -2.488321320 | 3.465306770  | 9.973558170   |
| C | 0.422296090  | 4.245204360  | 9.973558170   |
| C | 1.756883040  | 3.887602860  | 9.973558170   |
| H | -3.892929460 | 2.157438590  | -10.928718630 |
| H | -2.157438590 | 3.892929460  | -10.928718630 |
| H | -0.078068100 | 4.450095100  | -10.928718630 |
| H | 2.292656510  | 3.814861350  | -10.928718630 |
| H | 3.814861350  | 2.292656510  | -10.928718630 |
| H | 4.450095100  | -0.078068100 | -10.928718630 |
| H | 3.892929460  | -2.157438590 | -10.928718630 |
| H | 2.157438590  | -3.892929460 | -10.928718630 |
| H | 0.078068100  | -4.450095100 | -10.928718630 |
| H | -2.292656510 | -3.814861350 | -10.928718630 |
| H | -3.814861350 | -2.292656510 | -10.928718630 |
| H | -4.450095100 | 0.078068100  | -10.928718630 |
| H | 3.814861350  | 2.292656510  | 10.928718630  |
| H | 4.450095100  | -0.078068100 | 10.928718630  |
| H | 3.892929460  | -2.157438590 | 10.928718630  |
| H | 2.157438590  | -3.892929460 | 10.928718630  |
| H | 0.078068100  | -4.450095100 | 10.928718630  |
| H | -2.292656510 | -3.814861350 | 10.928718630  |
| H | -3.814861350 | -2.292656510 | 10.928718630  |
| H | -4.450095100 | 0.078068100  | 10.928718630  |
| H | -3.892929460 | 2.157438590  | 10.928718630  |
| H | -2.157438590 | 3.892929460  | 10.928718630  |
| H | -0.078068100 | 4.450095100  | 10.928718630  |
| H | 2.292656510  | 3.814861350  | 10.928718630  |

Nanotube (6,6) u09v0s  
B3LYP/STO-3G Energy: -8145.863334

|   |             |            |              |
|---|-------------|------------|--------------|
| C | -3.98682969 | 1.50593510 | -10.60884018 |
| C | -3.29759103 | 2.69972495 | -10.60880804 |
| C | -0.68923679 | 4.20566334 | -10.60884018 |
| C | 0.68923488  | 4.20566007 | -10.60880804 |
| C | 3.29759289  | 2.69972824 | -10.60884018 |

|   |             |             |              |
|---|-------------|-------------|--------------|
| C | 3.98682590  | 1.50593512  | -10.60880804 |
| C | 3.98682969  | -1.50593510 | -10.60884018 |
| C | 3.29759103  | -2.69972495 | -10.60880804 |
| C | 0.68923679  | -4.20566334 | -10.60884018 |
| C | -0.68923488 | -4.20566007 | -10.60880804 |
| C | -3.29759289 | -2.69972824 | -10.60884018 |
| C | -3.98682590 | -1.50593512 | -10.60880804 |
| C | -2.70052119 | 3.21815947  | -9.38720040  |
| C | -1.43674286 | 3.94779832  | -9.38715724  |
| C | 1.43674726  | 3.94779969  | -9.38720040  |
| C | 2.70052221  | 3.21815498  | -9.38715724  |
| C | 4.13726845  | 0.72964022  | -9.38720040  |
| C | 4.13726507  | -0.72964334 | -9.38715724  |
| C | 2.70052119  | -3.21815947 | -9.38720040  |
| C | 1.43674286  | -3.94779832 | -9.38715724  |
| C | -1.43674726 | -3.94779969 | -9.38720040  |
| C | -2.70052221 | -3.21815498 | -9.38715724  |
| C | -4.13726845 | -0.72964022 | -9.38720040  |
| C | -4.13726507 | 0.72964334  | -9.38715724  |
| C | -0.72667323 | 4.09687011  | -8.14471227  |
| C | 0.72667106  | 4.09686910  | -8.14466806  |
| C | 3.18465697  | 2.67775254  | -8.14471227  |
| C | 3.91132824  | 1.41911895  | -8.14466806  |
| C | 3.91133021  | -1.41911757 | -8.14471227  |
| C | 3.18465718  | -2.67775014 | -8.14466806  |
| C | 0.72667323  | -4.09687011 | -8.14471227  |
| C | -0.72667106 | -4.09686910 | -8.14466806  |
| C | -3.18465697 | -2.67775254 | -8.14471227  |
| C | -3.91132824 | -1.41911895 | -8.14466806  |
| C | -3.91133021 | 1.41911757  | -8.14471227  |
| C | -3.18465718 | 2.67775014  | -8.14466806  |
| C | 1.42323831  | 3.89374612  | -6.88704852  |
| C | 2.66046454  | 3.17943434  | -6.88701585  |
| C | 4.08370221  | 0.71431253  | -6.88704852  |
| C | 4.08370318  | -0.71431271 | -6.88701585  |
| C | 2.66046390  | -3.17943359 | -6.88704852  |
| C | 1.42323864  | -3.89374705 | -6.88701585  |
| C | -1.42323831 | -3.89374612 | -6.88704852  |
| C | -2.66046454 | -3.17943434 | -6.88701585  |
| C | -4.08370221 | -0.71431253 | -6.88704852  |
| C | -4.08370318 | 0.71431271  | -6.88701585  |
| C | -2.66046390 | 3.17943359  | -6.88704852  |
| C | -1.42323864 | 3.89374705  | -6.88701585  |
| C | 3.18688049  | 2.66956827  | -5.62833658  |
| C | 3.90535501  | 1.42513506  | -5.62831599  |
| C | 3.90535418  | -1.42513533 | -5.62833658  |
| C | 3.18688067  | -2.66956912 | -5.62831599  |
| C | 0.71847369  | -4.09470360 | -5.62833658  |
| C | -0.71847434 | -4.09470418 | -5.62831599  |
| C | -3.18688049 | -2.66956827 | -5.62833658  |
| C | -3.90535501 | -1.42513506 | -5.62831599  |
| C | -3.90535418 | 1.42513533  | -5.62833658  |
| C | -3.18688067 | 2.66956912  | -5.62831599  |
| C | -0.71847369 | 4.09470360  | -5.62833658  |
| C | 0.71847434  | 4.09470418  | -5.62831599  |
| C | 4.10702878  | 0.72484548  | -4.38033141  |
| C | 4.10702928  | -0.72484550 | -4.38032238  |
| C | 2.68124900  | -3.19436852 | -4.38033141  |
| C | 1.42578002  | -3.91921444 | -4.38032238  |
| C | -1.42577979 | -3.91921400 | -4.38033141  |
| C | -2.68124926 | -3.19436894 | -4.38032238  |
| C | -4.10702878 | -0.72484548 | -4.38033141  |
| C | -4.10702928 | 0.72484550  | -4.38032238  |
| C | -2.68124900 | 3.19436852  | -4.38033141  |
| C | -1.42578002 | 3.91921444  | -4.38032238  |
| C | 1.42577979  | 3.91921400  | -4.38033141  |
| C | 2.68124926  | 3.19436894  | -4.38032238  |
| C | 3.91419490  | -1.42818149 | -3.13248883  |
| C | 3.19394162  | -2.67570107 | -3.13249314  |
| C | 0.72025600  | -4.10388297 | -3.13248883  |

|   |             |             |             |
|---|-------------|-------------|-------------|
| C | -0.72025429 | -4.10388511 | -3.13249314 |
| C | -3.19393890 | -2.67570148 | -3.13248883 |
| C | -3.91419591 | -1.42818404 | -3.13249314 |
| C | -3.91419490 | 1.42818149  | -3.13248883 |
| C | -3.19394162 | 2.67570107  | -3.13249314 |
| C | -0.72025600 | 4.10388297  | -3.13248883 |
| C | 0.72025429  | 4.10388511  | -3.13249314 |
| C | 3.19393890  | 2.67570148  | -3.13248883 |
| C | 3.91419591  | 1.42818404  | -3.13249314 |
| C | 2.67169739  | -3.19228711 | -1.87627516 |
| C | 1.42875416  | -3.90990181 | -1.87629126 |
| C | -1.42875304 | -3.90990136 | -1.87627516 |
| C | -2.67169721 | -3.19228830 | -1.87629126 |
| C | -4.10045043 | -0.71761425 | -1.87627516 |
| C | -4.10045137 | 0.71761351  | -1.87629126 |
| C | -2.67169739 | 3.19228711  | -1.87627516 |
| C | -1.42875416 | 3.90990181  | -1.87629126 |
| C | 1.42875304  | 3.90990136  | -1.87627516 |
| C | 2.67169721  | 3.19228830  | -1.87629126 |
| C | 4.10045043  | 0.71761425  | -1.87627516 |
| C | 4.10045137  | -0.71761351 | -1.87629126 |
| C | 0.72311236  | -4.10563534 | -0.62318499 |
| C | -0.72311071 | -4.10563540 | -0.62321106 |
| C | -3.19402833 | -2.67905134 | -0.62318499 |
| C | -3.91713991 | -1.42658545 | -0.62321106 |
| C | -3.91714068 | 1.42658400  | -0.62318499 |
| C | -3.19402920 | 2.67904995  | -0.62321106 |
| C | -0.72311236 | 4.10563534  | -0.62318499 |
| C | 0.72311071  | 4.10563540  | -0.62321106 |
| C | 3.19402833  | 2.67905134  | -0.62318499 |
| C | 3.91713991  | 1.42658545  | -0.62321106 |
| C | 3.91714068  | -1.42658400 | -0.62318499 |
| C | 3.19402920  | -2.67904995 | -0.62321106 |
| C | -1.42658545 | -3.91713991 | 0.62321106  |
| C | -2.67905134 | -3.19402833 | 0.62318499  |
| C | -4.10563540 | -0.72311071 | 0.62321106  |
| C | -4.10563534 | 0.72311236  | 0.62318499  |
| C | -2.67904995 | 3.19402920  | 0.62321106  |
| C | -1.42658400 | 3.91714068  | 0.62318499  |
| C | 1.42658545  | 3.91713991  | 0.62321106  |
| C | 2.67905134  | 3.19402833  | 0.62318499  |
| C | 4.10563540  | 0.72311071  | 0.62321106  |
| C | 4.10563534  | -0.72311236 | 0.62318499  |
| C | 2.67904995  | -3.19402920 | 0.62321106  |
| C | 1.42658400  | -3.91714068 | 0.62318499  |
| C | -3.19228830 | -2.67169721 | 1.87629126  |
| C | -3.90990136 | -1.42875304 | 1.87627516  |
| C | -3.90990181 | 1.42875416  | 1.87629126  |
| C | -3.19228711 | 2.67169739  | 1.87627516  |
| C | -0.71761351 | 4.10045137  | 1.87629126  |
| C | 0.71761425  | 4.10045043  | 1.87627516  |
| C | 3.19228830  | 2.67169721  | 1.87629126  |
| C | 3.90990136  | 1.42875304  | 1.87627516  |
| C | 3.90990181  | -1.42875416 | 1.87629126  |
| C | 3.19228711  | -2.67169739 | 1.87627516  |
| C | 0.71761351  | -4.10045137 | 1.87629126  |
| C | -0.71761425 | -4.10045043 | 1.87627516  |
| C | -4.10388511 | -0.72025429 | 3.13249314  |
| C | -4.10388297 | 0.72025600  | 3.13248883  |
| C | -2.67570107 | 3.19394162  | 3.13249314  |
| C | -1.42818149 | 3.91419490  | 3.13248883  |
| C | 1.42818404  | 3.91419591  | 3.13249314  |
| C | 2.67570148  | 3.19393890  | 3.13248883  |
| C | 4.10388511  | 0.72025429  | 3.13249314  |
| C | 4.10388297  | -0.72025600 | 3.13248883  |
| C | 2.67570107  | -3.19394162 | 3.13249314  |
| C | 1.42818149  | -3.91419490 | 3.13248883  |
| C | -1.42818404 | -3.91419591 | 3.13249314  |
| C | -2.67570148 | -3.19393890 | 3.13248883  |
| C | -3.91921444 | 1.42578002  | 4.38032238  |

|   |             |             |             |
|---|-------------|-------------|-------------|
| C | -3.19436852 | 2.68124900  | 4.38033141  |
| C | -0.72484550 | 4.10702928  | 4.38032238  |
| C | 0.72484548  | 4.10702878  | 4.38033141  |
| C | 3.19436894  | 2.68124926  | 4.38032238  |
| C | 3.91921400  | 1.42577979  | 4.38033141  |
| C | 3.91921444  | -1.42578002 | 4.38032238  |
| C | 3.19436852  | -2.68124900 | 4.38033141  |
| C | 0.72484550  | -4.10702928 | 4.38032238  |
| C | -0.72484548 | -4.10702878 | 4.38033141  |
| C | -3.19436894 | -2.68124926 | 4.38032238  |
| C | -3.91921400 | -1.42577979 | 4.38033141  |
| C | -2.66956912 | 3.18688067  | 5.62831599  |
| C | -1.42513533 | 3.90535418  | 5.62833658  |
| C | 1.42513506  | 3.90535501  | 5.62831599  |
| C | 2.66956827  | 3.18688049  | 5.62833658  |
| C | 4.09470418  | 0.71847434  | 5.62831599  |
| C | 4.09470360  | -0.71847369 | 5.62833658  |
| C | 2.66956912  | -3.18688067 | 5.62831599  |
| C | 1.42513533  | -3.90535418 | 5.62833658  |
| C | -1.42513506 | -3.90535501 | 5.62831599  |
| C | -2.66956827 | -3.18688049 | 5.62833658  |
| C | -4.09470418 | -0.71847434 | 5.62831599  |
| C | -4.09470360 | 0.71847369  | 5.62833658  |
| C | -0.71431271 | 4.08370318  | 6.88701585  |
| C | 0.71431253  | 4.08370221  | 6.88704852  |
| C | 3.17943434  | 2.66046454  | 6.88701585  |
| C | 3.89374612  | 1.42323831  | 6.88704852  |
| C | 3.89374705  | -1.42323864 | 6.88701585  |
| C | 3.17943359  | -2.66046390 | 6.88704852  |
| C | 0.71431271  | -4.08370318 | 6.88701585  |
| C | -0.71431253 | -4.08370221 | 6.88704852  |
| C | -3.17943434 | -2.66046454 | 6.88701585  |
| C | -3.89374612 | -1.42323831 | 6.88704852  |
| C | -3.89374705 | 1.42323864  | 6.88701585  |
| C | -3.17943359 | 2.66046390  | 6.88704852  |
| C | 1.41911895  | 3.91132824  | 8.14466806  |
| C | 2.67775254  | 3.18465697  | 8.14471227  |
| C | 4.09686910  | 0.72667106  | 8.14466806  |
| C | 4.09687011  | -0.72667323 | 8.14471227  |
| C | 2.67775014  | -3.18465718 | 8.14466806  |
| C | 1.41911757  | -3.91133021 | 8.14471227  |
| C | -1.41911895 | -3.91132824 | 8.14466806  |
| C | -2.67775254 | -3.18465697 | 8.14471227  |
| C | -4.09686910 | -0.72667106 | 8.14466806  |
| C | -4.09687011 | 0.72667323  | 8.14471227  |
| C | -2.67775014 | 3.18465718  | 8.14466806  |
| C | -1.41911757 | 3.91133021  | 8.14471227  |
| C | 3.21815498  | 2.70052221  | 9.38715724  |
| C | 3.94779969  | 1.43674726  | 9.38720040  |
| C | 3.94779832  | -1.43674286 | 9.38715724  |
| C | 3.21815947  | -2.70052119 | 9.38720040  |
| C | 0.72964334  | -4.13726507 | 9.38715724  |
| C | -0.72964022 | -4.13726845 | 9.38720040  |
| C | -3.21815498 | -2.70052221 | 9.38715724  |
| C | -3.94779969 | -1.43674726 | 9.38720040  |
| C | -3.94779832 | 1.43674286  | 9.38715724  |
| C | -3.21815947 | 2.70052119  | 9.38720040  |
| C | -0.72964334 | 4.13726507  | 9.38715724  |
| C | 0.72964022  | 4.13726845  | 9.38720040  |
| C | 4.20566007  | 0.68923488  | 10.60880804 |
| C | 4.20566334  | -0.68923679 | 10.60884018 |
| C | 2.69972495  | -3.29759103 | 10.60880804 |
| C | 1.50593510  | -3.98682969 | 10.60884018 |
| C | -1.50593512 | -3.98682590 | 10.60880804 |
| C | -2.69972824 | -3.29759289 | 10.60884018 |
| C | -4.20566007 | -0.68923488 | 10.60880804 |
| C | -4.20566334 | 0.68923679  | 10.60884018 |
| C | -2.69972495 | 3.29759103  | 10.60880804 |
| C | -1.50593510 | 3.98682969  | 10.60884018 |
| C | 1.50593512  | 3.98682590  | 10.60880804 |

|   |             |             |              |
|---|-------------|-------------|--------------|
| C | 2.69972824  | 3.29759289  | 10.60884018  |
| H | -4.32087383 | 1.07694119  | -11.56235083 |
| H | -3.09309698 | 3.20352313  | -11.56236179 |
| H | -1.22777848 | 4.28045710  | -11.56235083 |
| H | 1.22778392  | 4.28046213  | -11.56236179 |
| H | 3.09309534  | 3.20351590  | -11.56235083 |
| H | 4.32088090  | 1.07693900  | -11.56236179 |
| H | 4.32087383  | -1.07694119 | -11.56235083 |
| H | 3.09309698  | -3.20352313 | -11.56236179 |
| H | 1.22777848  | -4.28045710 | -11.56235083 |
| H | -1.22778392 | -4.28046213 | -11.56236179 |
| H | -3.09309534 | -3.20351590 | -11.56235083 |
| H | -4.32088090 | -1.07693900 | -11.56236179 |
| H | 4.28046213  | 1.22778392  | 11.56236179  |
| H | 4.28045710  | -1.22777848 | 11.56235083  |
| H | 3.20352313  | -3.09309698 | 11.56236179  |
| H | 1.07694119  | -4.32087383 | 11.56235083  |
| H | -1.07693900 | -4.32088090 | 11.56236179  |
| H | -3.20351590 | -3.09309534 | 11.56235083  |
| H | -4.28046213 | -1.22778392 | 11.56236179  |
| H | -4.28045710 | 1.22777848  | 11.56235083  |
| H | -3.20352313 | 3.09309698  | 11.56236179  |
| H | -1.07694119 | 4.32087383  | 11.56235083  |
| H | 1.07693900  | 4.32088090  | 11.56236179  |
| H | 3.20351590  | 3.09309534  | 11.56235083  |

Nanotube (6,6) u09v6\_  
B3LYP/STO-3G Energy: -8597.657855

|   |              |              |              |
|---|--------------|--------------|--------------|
| C | -3.881949080 | 1.757387850  | 11.218168120 |
| C | -4.240560440 | 0.419032020  | 11.218168120 |
| C | -3.462917060 | -2.483172590 | 11.218168120 |
| C | -2.483172590 | -3.462917060 | 11.218168120 |
| C | 0.419032020  | -4.240560440 | 11.218168120 |
| C | 1.757387850  | -3.881949080 | 11.218168120 |
| C | 3.881949080  | -1.757387850 | 11.218168120 |
| C | 4.240560440  | -0.419032020 | 11.218168120 |
| C | 3.462917060  | 2.483172590  | 11.218168120 |
| C | 2.483172590  | 3.462917060  | 11.218168120 |
| C | -0.419032020 | 4.240560440  | 11.218168120 |
| C | -1.757387850 | 3.881949080  | 11.218168120 |
| C | -4.197556300 | -0.362322490 | 10.002998330 |
| C | -3.816351640 | -1.784997670 | 10.002998330 |
| C | -1.784997670 | -3.816351640 | 10.002998330 |
| C | -0.362322490 | -4.197556300 | 10.002998330 |
| C | 2.412558630  | -3.454029150 | 10.002998330 |
| C | 3.454029150  | -2.412558630 | 10.002998330 |
| C | 4.197556300  | 0.362322490  | 10.002998330 |
| C | 3.816351640  | 1.784997670  | 10.002998330 |
| C | 1.784997670  | 3.816351640  | 10.002998330 |
| C | 0.362322490  | 4.197556300  | 10.002998330 |
| C | -2.412558630 | 3.454029150  | 10.002998330 |
| C | -3.454029150 | 2.412558630  | 10.002998330 |
| C | -3.411124300 | -2.384915380 | 8.762968080  |
| C | -2.384915380 | -3.411124300 | 8.762968080  |
| C | 0.359835150  | -4.146577990 | 8.762968080  |
| C | 1.761662610  | -3.770959450 | 8.762968080  |
| C | 3.770959450  | -1.761662610 | 8.762968080  |
| C | 4.146577990  | -0.359835150 | 8.762968080  |
| C | 3.411124300  | 2.384915380  | 8.762968080  |
| C | 2.384915380  | 3.411124300  | 8.762968080  |
| C | -0.359835150 | 4.146577990  | 8.762968080  |
| C | -1.761662610 | 3.770959450  | 8.762968080  |
| C | -3.770959450 | 1.761662610  | 8.762968080  |
| C | -4.146577990 | 0.359835150  | 8.762968080  |
| C | -1.749625630 | -3.764309010 | 7.500163360  |
| C | -0.366934260 | -4.134800040 | 7.500163360  |
| C | 2.385174420  | -3.397374740 | 7.500163360  |

|   |              |              |             |
|---|--------------|--------------|-------------|
| C | 3.397374740  | -2.385174420 | 7.500163360 |
| C | 4.134800040  | 0.366934260  | 7.500163360 |
| C | 3.764309010  | 1.749625630  | 7.500163360 |
| C | 1.749625630  | 3.764309010  | 7.500163360 |
| C | 0.366934260  | 4.134800040  | 7.500163360 |
| C | -2.385174420 | 3.397374740  | 7.500163360 |
| C | -3.397374740 | 2.385174420  | 7.500163360 |
| C | -4.134800040 | -0.366934260 | 7.500163360 |
| C | -3.764309010 | -1.749625630 | 7.500163360 |
| C | 0.361687520  | -4.153723770 | 6.248444090 |
| C | 1.763631310  | -3.778074060 | 6.248444090 |
| C | 3.778074060  | -1.763631310 | 6.248444090 |
| C | 4.153723770  | -0.361687520 | 6.248444090 |
| C | 3.416386550  | 2.390092460  | 6.248444090 |
| C | 2.390092460  | 3.416386550  | 6.248444090 |
| C | -0.361687520 | 4.153723770  | 6.248444090 |
| C | -1.763631310 | 3.778074060  | 6.248444090 |
| C | -3.778074060 | 1.763631310  | 6.248444090 |
| C | -4.153723770 | 0.361687520  | 6.248444090 |
| C | -3.416386550 | -2.390092460 | 6.248444090 |
| C | -2.390092460 | -3.416386550 | 6.248444090 |
| C | 2.393068550  | -3.417770040 | 5.005778600 |
| C | 3.417770040  | -2.393068550 | 5.005778600 |
| C | 4.156409950  | 0.363573130  | 5.005778600 |
| C | 3.781343170  | 1.763341410  | 5.005778600 |
| C | 1.763341410  | 3.781343170  | 5.005778600 |
| C | 0.363573130  | 4.156409950  | 5.005778600 |
| C | -2.393068550 | 3.417770040  | 5.005778600 |
| C | -3.417770040 | 2.393068550  | 5.005778600 |
| C | -4.156409950 | -0.363573130 | 5.005778600 |
| C | -3.781343170 | -1.763341410 | 5.005778600 |
| C | -1.763341410 | -3.781343170 | 5.005778600 |
| C | -0.363573130 | -4.156409950 | 5.005778600 |
| C | 3.777142650  | -1.756765750 | 3.750990760 |
| C | 4.149484360  | -0.367167560 | 3.750990760 |
| C | 3.409975090  | 2.392718620  | 3.750990760 |
| C | 2.392718620  | 3.409975090  | 3.750990760 |
| C | -0.367167560 | 4.149484360  | 3.750990760 |
| C | -1.756765750 | 3.777142650  | 3.750990760 |
| C | -3.777142650 | 1.756765750  | 3.750990760 |
| C | -4.149484360 | 0.367167560  | 3.750990760 |
| C | -3.409975090 | -2.392718620 | 3.750990760 |
| C | -2.392718620 | -3.409975090 | 3.750990760 |
| C | 0.367167560  | -4.149484360 | 3.750990760 |
| C | 1.756765750  | -3.777142650 | 3.750990760 |
| C | 4.156985330  | 0.363033570  | 2.498247710 |
| C | 3.781571680  | 1.764096370  | 2.498247710 |
| C | 1.764096370  | 3.781571680  | 2.498247710 |
| C | 0.363033570  | 4.156985330  | 2.498247710 |
| C | -2.392888960 | 3.418538120  | 2.498247710 |
| C | -3.418538120 | 2.392888960  | 2.498247710 |
| C | -4.156985330 | -0.363033570 | 2.498247710 |
| C | -3.781571680 | -1.764096370 | 2.498247710 |
| C | -1.764096370 | -3.781571680 | 2.498247710 |
| C | -0.363033570 | -4.156985330 | 2.498247710 |
| C | 2.392888960  | -3.418538120 | 2.498247710 |
| C | 3.418538120  | -2.392888960 | 2.498247710 |
| C | 3.418063760  | 2.392973180  | 1.253850130 |
| C | 2.392973180  | 3.418063760  | 1.253850130 |
| C | -0.363343690 | 4.156616640  | 1.253850130 |
| C | -1.763643460 | 3.781407450  | 1.253850130 |
| C | -3.781407450 | 1.763643460  | 1.253850130 |
| C | -4.156616640 | 0.363343690  | 1.253850130 |
| C | -3.418063760 | -2.392973180 | 1.253850130 |
| C | -2.392973180 | -3.418063760 | 1.253850130 |
| C | 0.363343690  | -4.156616640 | 1.253850130 |
| C | 1.763643460  | -3.781407450 | 1.253850130 |
| C | 3.781407450  | -1.763643460 | 1.253850130 |
| C | 4.156616640  | -0.363343690 | 1.253850130 |
| C | 1.757145880  | 3.776992680  | 0.000000000 |



|   |              |              |              |
|---|--------------|--------------|--------------|
| C | 0.366763370  | 4.149544540  | 0.000000000  |
| C | -2.392398670 | 3.410229300  | 0.000000000  |
| C | -3.410229300 | 2.392398670  | 0.000000000  |
| C | -4.149544540 | -0.366763370 | 0.000000000  |
| C | -3.776992680 | -1.757145880 | 0.000000000  |
| C | -1.757145880 | -3.776992680 | 0.000000000  |
| C | -0.366763370 | -4.149544540 | 0.000000000  |
| C | 2.392398670  | -3.410229300 | 0.000000000  |
| C | 3.410229300  | -2.392398670 | 0.000000000  |
| C | 4.149544540  | 0.366763370  | 0.000000000  |
| C | 3.776992680  | 1.757145880  | 0.000000000  |
| C | -0.363343690 | 4.156616640  | -1.253850130 |
| C | -1.763643460 | 3.781407450  | -1.253850130 |
| C | -3.781407450 | 1.763643460  | -1.253850130 |
| C | -4.156616640 | 0.363343690  | -1.253850130 |
| C | -3.418063760 | -2.392973180 | -1.253850130 |
| C | -2.392973180 | -3.418063760 | -1.253850130 |
| C | 0.363343690  | -4.156616640 | -1.253850130 |
| C | 1.763643460  | -3.781407450 | -1.253850130 |
| C | 3.781407450  | -1.763643460 | -1.253850130 |
| C | 4.156616640  | -0.363343690 | -1.253850130 |
| C | 3.418063760  | 2.392973180  | -1.253850130 |
| C | 2.392973180  | 3.418063760  | -1.253850130 |
| C | -2.392888960 | 3.418538120  | -2.498247710 |
| C | -3.418538120 | 2.392888960  | -2.498247710 |
| C | -4.156985330 | -0.363033570 | -2.498247710 |
| C | -3.781571680 | -1.764096370 | -2.498247710 |
| C | -1.764096370 | -3.781571680 | -2.498247710 |
| C | -0.363033570 | -4.156985330 | -2.498247710 |
| C | 2.392888960  | -3.418538120 | -2.498247710 |
| C | 3.418538120  | -2.392888960 | -2.498247710 |
| C | 4.156985330  | 0.363033570  | -2.498247710 |
| C | 3.781571680  | 1.764096370  | -2.498247710 |
| C | 1.764096370  | 3.781571680  | -2.498247710 |
| C | 0.363033570  | 4.156985330  | -2.498247710 |
| C | -3.777142650 | 1.756765750  | -3.750990760 |
| C | -4.149484360 | 0.367167560  | -3.750990760 |
| C | -3.409975090 | -2.392718620 | -3.750990760 |
| C | -2.392718620 | -3.409975090 | -3.750990760 |
| C | 0.367167560  | -4.149484360 | -3.750990760 |
| C | 1.756765750  | -3.777142650 | -3.750990760 |
| C | 3.777142650  | -1.756765750 | -3.750990760 |
| C | 4.149484360  | -0.367167560 | -3.750990760 |
| C | 3.409975090  | 2.392718620  | -3.750990760 |
| C | 2.392718620  | 3.409975090  | -3.750990760 |
| C | -0.367167560 | 4.149484360  | -3.750990760 |
| C | -1.756765750 | 3.777142650  | -3.750990760 |
| C | -4.156409950 | -0.363573130 | -5.005778600 |
| C | -3.781343170 | -1.763341410 | -5.005778600 |
| C | -1.763341410 | -3.781343170 | -5.005778600 |
| C | -0.363573130 | -4.156409950 | -5.005778600 |
| C | 2.393068550  | -3.417770040 | -5.005778600 |
| C | 3.417770040  | -2.393068550 | -5.005778600 |
| C | 4.156409950  | 0.363573130  | -5.005778600 |
| C | 3.781343170  | 1.763341410  | -5.005778600 |
| C | 1.763341410  | 3.781343170  | -5.005778600 |
| C | 0.363573130  | 4.156409950  | -5.005778600 |
| C | -2.393068550 | 3.417770040  | -5.005778600 |
| C | -3.417770040 | 2.393068550  | -5.005778600 |
| C | -3.416386550 | -2.390092460 | -6.248444090 |
| C | -2.390092460 | -3.416386550 | -6.248444090 |
| C | 0.361687520  | -4.153723770 | -6.248444090 |
| C | 1.763631310  | -3.778074060 | -6.248444090 |
| C | 3.778074060  | -1.763631310 | -6.248444090 |
| C | 4.153723770  | -0.361687520 | -6.248444090 |
| C | 3.416386550  | 2.390092460  | -6.248444090 |
| C | 2.390092460  | 3.416386550  | -6.248444090 |
| C | -0.361687520 | 4.153723770  | -6.248444090 |
| C | -1.763631310 | 3.778074060  | -6.248444090 |
| C | -3.778074060 | 1.763631310  | -6.248444090 |

|   |              |              |               |
|---|--------------|--------------|---------------|
| C | -4.153723770 | 0.361687520  | -6.248444090  |
| C | -1.749625630 | -3.764309010 | -7.500163360  |
| C | -0.366934260 | -4.134800040 | -7.500163360  |
| C | 2.385174420  | -3.397374740 | -7.500163360  |
| C | 3.397374740  | -2.385174420 | -7.500163360  |
| C | 4.134800040  | 0.366934260  | -7.500163360  |
| C | 3.764309010  | 1.749625630  | -7.500163360  |
| C | 1.749625630  | 3.764309010  | -7.500163360  |
| C | 0.366934260  | 4.134800040  | -7.500163360  |
| C | -2.385174420 | 3.397374740  | -7.500163360  |
| C | -3.397374740 | 2.385174420  | -7.500163360  |
| C | -4.134800040 | -0.366934260 | -7.500163360  |
| C | -3.764309010 | -1.749625630 | -7.500163360  |
| C | 0.359835150  | -4.146577990 | -8.762968080  |
| C | 1.761662610  | -3.770959450 | -8.762968080  |
| C | 3.770959450  | -1.761662610 | -8.762968080  |
| C | 4.146577990  | -0.359835150 | -8.762968080  |
| C | 3.411124300  | 2.384915380  | -8.762968080  |
| C | 2.384915380  | 3.411124300  | -8.762968080  |
| C | -0.359835150 | 4.146577990  | -8.762968080  |
| C | -1.761662610 | 3.770959450  | -8.762968080  |
| C | -3.770959450 | 1.761662610  | -8.762968080  |
| C | -4.146577990 | 0.359835150  | -8.762968080  |
| C | -3.411124300 | -2.384915380 | -8.762968080  |
| C | -2.384915380 | -3.411124300 | -8.762968080  |
| C | 2.412558630  | -3.454029150 | -10.002998330 |
| C | 3.454029150  | -2.412558630 | -10.002998330 |
| C | 4.197556300  | 0.362322490  | -10.002998330 |
| C | 3.816351640  | 1.784997670  | -10.002998330 |
| C | 1.784997670  | 3.816351640  | -10.002998330 |
| C | 0.362322490  | 4.197556300  | -10.002998330 |
| C | -2.412558630 | 3.454029150  | -10.002998330 |
| C | -3.454029150 | 2.412558630  | -10.002998330 |
| C | -4.197556300 | -0.362322490 | -10.002998330 |
| C | -3.816351640 | -1.784997670 | -10.002998330 |
| C | -1.784997670 | -3.816351640 | -10.002998330 |
| C | -0.362322490 | -4.197556300 | -10.002998330 |
| C | 3.881949080  | -1.757387850 | -11.218168120 |
| C | 4.240560440  | -0.419032020 | -11.218168120 |
| C | 3.462917060  | 2.483172590  | -11.218168120 |
| C | 2.483172590  | 3.462917060  | -11.218168120 |
| C | -0.419032020 | 4.240560440  | -11.218168120 |
| C | -1.757387850 | 3.881949080  | -11.218168120 |
| C | -3.881949080 | 1.757387850  | -11.218168120 |
| C | -4.240560440 | 0.419032020  | -11.218168120 |
| C | -3.462917060 | -2.483172590 | -11.218168120 |
| C | -2.483172590 | -3.462917060 | -11.218168120 |
| C | 0.419032020  | -4.240560440 | -11.218168120 |
| C | 1.757387850  | -3.881949080 | -11.218168120 |
| H | -3.790597880 | 2.284652960  | 12.176339860  |
| H | -4.425080540 | -0.083268560 | 12.176339860  |
| H | -3.873866440 | -2.140427580 | 12.176339860  |
| H | -2.140427580 | -3.873866440 | 12.176339860  |
| H | -0.083268560 | -4.425080540 | 12.176339860  |
| H | 2.284652960  | -3.790597880 | 12.176339860  |
| H | 3.790597880  | -2.284652960 | 12.176339860  |
| H | 4.425080540  | 0.083268560  | 12.176339860  |
| H | 3.873866440  | 2.140427580  | 12.176339860  |
| H | 2.140427580  | 3.873866440  | 12.176339860  |
| H | 0.083268560  | 4.425080540  | 12.176339860  |
| H | -2.284652960 | 3.790597880  | 12.176339860  |
| H | 3.790597880  | -2.284652960 | -12.176339860 |
| H | 4.425080540  | 0.083268560  | -12.176339860 |
| H | 3.873866440  | 2.140427580  | -12.176339860 |
| H | 2.140427580  | 3.873866440  | -12.176339860 |
| H | 0.083268560  | 4.425080540  | -12.176339860 |
| H | -2.284652960 | 3.790597880  | -12.176339860 |
| H | -3.790597880 | 2.284652960  | -12.176339860 |
| H | -4.425080540 | -0.083268560 | -12.176339860 |
| H | -3.873866440 | -2.140427580 | -12.176339860 |

|   |              |              |               |
|---|--------------|--------------|---------------|
| H | -2.140427580 | -3.873866440 | -12.176339860 |
| H | -0.083268560 | -4.425080540 | -12.176339860 |
| H | 2.284652960  | -3.790597880 | -12.176339860 |

Nanotube (6,6) u10v0s  
B3LYP/STO-3G Energy: -9049.433271

|   |              |              |               |
|---|--------------|--------------|---------------|
| C | -3.986457200 | 1.503516600  | -11.850731960 |
| C | -3.295313710 | 2.700617550  | -11.850753740 |
| C | -0.691145030 | 4.204131510  | -11.850731960 |
| C | 0.691146550  | 4.204134160  | -11.850753740 |
| C | 3.295312170  | 2.700614910  | -11.850731960 |
| C | 3.986460260  | 1.503516610  | -11.850753740 |
| C | 3.986457200  | -1.503516600 | -11.850731960 |
| C | 3.295313710  | -2.700617550 | -11.850753740 |
| C | 0.691145030  | -4.204131510 | -11.850731960 |
| C | -0.691146550 | -4.204134160 | -11.850753740 |
| C | -3.295312170 | -2.700614910 | -11.850731960 |
| C | -3.986460260 | -1.503516610 | -11.850753740 |
| C | -2.707541060 | 3.222319860  | -10.632596750 |
| C | -1.436838280 | 3.955959960  | -10.632613400 |
| C | 1.436840330  | 3.955959270  | -10.632596750 |
| C | 2.707542680  | 3.222318430  | -10.632613400 |
| C | 4.144381390  | 0.733639410  | -10.632596750 |
| C | 4.144380960  | -0.733641530 | -10.632613400 |
| C | 2.707541060  | -3.222319860 | -10.632596750 |
| C | 1.436838280  | -3.955959960 | -10.632613400 |
| C | -1.436840330 | -3.955959270 | -10.632596750 |
| C | -2.707542680 | -3.222318430 | -10.632613400 |
| C | -4.144381390 | -0.733639410 | -10.632596750 |
| C | -4.144380960 | 0.733641530  | -10.632613400 |
| C | -0.726341340 | 4.098514890  | -9.392158840  |
| C | 0.726341090  | 4.098515320  | -9.392167890  |
| C | 3.186247340  | 2.678287500  | -9.392158840  |
| C | 3.912588930  | 1.420227820  | -9.392167890  |
| C | 3.912588680  | -1.420227390 | -9.392158840  |
| C | 3.186247840  | -2.678287500 | -9.392167890  |
| C | 0.726341340  | -4.098514890 | -9.392158840  |
| C | -0.726341090 | -4.098515320 | -9.392167890  |
| C | -3.186247340 | -2.678287500 | -9.392158840  |
| C | -3.912588930 | -1.420227820 | -9.392167890  |
| C | -3.912588680 | 1.420227390  | -9.392158840  |
| C | -3.186247840 | 2.678287500  | -9.392167890  |
| C | 1.424325810  | 3.896579750  | -8.131594330  |
| C | 2.662375120  | 3.181791070  | -8.131598290  |
| C | 4.086699960  | 0.714787540  | -8.131594330  |
| C | 4.086699450  | -0.714788950 | -8.131598290  |
| C | 2.662374150  | -3.181792210 | -8.131594330  |
| C | 1.424324330  | -3.896580020 | -8.131598290  |
| C | -1.424325810 | -3.896579750 | -8.131594330  |
| C | -2.662375120 | -3.181791070 | -8.131598290  |
| C | -4.086699960 | -0.714787540 | -8.131594330  |
| C | -4.086699450 | 0.714788950  | -8.131598290  |
| C | -2.662374150 | 3.181792210  | -8.131594330  |
| C | -1.424324330 | 3.896580020  | -8.131598290  |
| C | 3.190472670  | 2.676451140  | -6.876167390  |
| C | 3.913110880  | 1.424802670  | -6.876162410  |
| C | 3.913111020  | -1.424804810 | -6.876167390  |
| C | 3.190470750  | -2.676452090 | -6.876162410  |
| C | 0.722638350  | -4.101255950 | -6.876167390  |
| C | -0.722640130 | -4.101254760 | -6.876162410  |
| C | -3.190472670 | -2.676451140 | -6.876167390  |
| C | -3.913110880 | -1.424802670 | -6.876162410  |
| C | -3.913111020 | 1.424804810  | -6.876167390  |
| C | -3.190470750 | 2.676452090  | -6.876162410  |
| C | -0.722638350 | 4.101255950  | -6.876167390  |
| C | 0.722640130  | 4.101254760  | -6.876162410  |
| C | 4.108937500  | 0.725345850  | -5.632191140  |

|   |              |              |              |
|---|--------------|--------------|--------------|
| C | 4.108937930  | -0.725345140 | -5.632179920 |
| C | 2.682636680  | -3.195771330 | -5.632191140 |
| C | 1.426301650  | -3.921117200 | -5.632179920 |
| C | -1.426300820 | -3.921117180 | -5.632191140 |
| C | -2.682636280 | -3.195772060 | -5.632179920 |
| C | -4.108937500 | -0.725345850 | -5.632191140 |
| C | -4.108937930 | 0.725345140  | -5.632179920 |
| C | -2.682636680 | 3.195771330  | -5.632191140 |
| C | -1.426301650 | 3.921117200  | -5.632179920 |
| C | 1.426300820  | 3.921117180  | -5.632191140 |
| C | 2.682636280  | 3.195772060  | -5.632179920 |
| C | 3.911582080  | -1.428390950 | -4.380522860 |
| C | 3.192814320  | -2.673333060 | -4.380513970 |
| C | 0.718768190  | -4.101724930 | -4.380522860 |
| C | -0.718767180 | -4.101724840 | -4.380513970 |
| C | -3.192813890 | -2.673333980 | -4.380522860 |
| C | -3.911581500 | -1.428391780 | -4.380513970 |
| C | -3.911582080 | 1.428390950  | -4.380522860 |
| C | -3.192814320 | 2.673333060  | -4.380513970 |
| C | -0.718768190 | 4.101724930  | -4.380522860 |
| C | 0.718767180  | 4.101724840  | -4.380513970 |
| C | 3.192813890  | 2.673333980  | -4.380522860 |
| C | 3.911581500  | 1.428391780  | -4.380513970 |
| C | 2.676746860  | -3.193253740 | -3.124322830 |
| C | 1.427065610  | -3.914756760 | -3.124321740 |
| C | -1.427065430 | -3.914757650 | -3.124322830 |
| C | -2.676745990 | -3.193253450 | -3.124321740 |
| C | -4.103812290 | -0.721503910 | -3.124322830 |
| C | -4.103811610 | 0.721503300  | -3.124321740 |
| C | -2.676746860 | 3.193253740  | -3.124322830 |
| C | -1.427065610 | 3.914756760  | -3.124321740 |
| C | 1.427065430  | 3.914757650  | -3.124322830 |
| C | 2.676745990  | 3.193253450  | -3.124321740 |
| C | 4.103812290  | 0.721503910  | -3.124322830 |
| C | 4.103811610  | -0.721503300 | -3.124321740 |
| C | 0.725642830  | -4.108826490 | -1.877282290 |
| C | -0.725640920 | -4.108827510 | -1.877290200 |
| C | -3.195526710 | -2.682838370 | -1.877282290 |
| C | -3.921169460 | -1.425990280 | -1.877290200 |
| C | -3.921169540 | 1.425988120  | -1.877282290 |
| C | -3.195528540 | 2.682837220  | -1.877290200 |
| C | -0.725642830 | 4.108826490  | -1.877282290 |
| C | 0.725640920  | 4.108827510  | -1.877290200 |
| C | 3.195526710  | 2.682838370  | -1.877282290 |
| C | 3.921169460  | 1.425990280  | -1.877290200 |
| C | 3.921169540  | -1.425988120 | -1.877282290 |
| C | 3.195528540  | -2.682837220 | -1.877290200 |
| C | -1.427800260 | -3.913156310 | -0.628239690 |
| C | -2.674991580 | -3.193089020 | -0.628253850 |
| C | -4.102792900 | -0.720066850 | -0.628239690 |
| C | -4.102792000 | 0.720066150  | -0.628253850 |
| C | -2.674992640 | 3.193089450  | -0.628239690 |
| C | -1.427800420 | 3.913155170  | -0.628253850 |
| C | 1.427800260  | 3.913156310  | -0.628239690 |
| C | 2.674991580  | 3.193089020  | -0.628253850 |
| C | 4.102792900  | 0.720066850  | -0.628239690 |
| C | 4.102792000  | -0.720066150 | -0.628253850 |
| C | 2.674992640  | -3.193089450 | -0.628239690 |
| C | 1.427800420  | -3.913155170 | -0.628253850 |
| C | -3.193089020 | -2.674991580 | 0.628253850  |
| C | -3.913156310 | -1.427800260 | 0.628239690  |
| C | -3.913155170 | 1.427800420  | 0.628253850  |
| C | -3.193089450 | 2.674992640  | 0.628239690  |
| C | -0.720066150 | 4.102792000  | 0.628253850  |
| C | 0.720066850  | 4.102792900  | 0.628239690  |
| C | 3.193089020  | 2.674991580  | 0.628253850  |
| C | 3.913156310  | 1.427800260  | 0.628239690  |
| C | 3.913155170  | -1.427800420 | 0.628253850  |
| C | 3.193089450  | -2.674992640 | 0.628239690  |
| C | 0.720066150  | -4.102792000 | 0.628253850  |

|   |              |              |             |
|---|--------------|--------------|-------------|
| C | -0.720066850 | -4.102792900 | 0.628239690 |
| C | -4.108827510 | -0.725640920 | 1.877290200 |
| C | -4.108826490 | 0.725642830  | 1.877282290 |
| C | -2.682837220 | 3.195528540  | 1.877290200 |
| C | -1.425988120 | 3.921169540  | 1.877282290 |
| C | 1.425990280  | 3.921169460  | 1.877290200 |
| C | 2.682838370  | 3.195526710  | 1.877282290 |
| C | 4.108827510  | 0.725640920  | 1.877290200 |
| C | 4.108826490  | -0.725642830 | 1.877282290 |
| C | 2.682837220  | -3.195528540 | 1.877290200 |
| C | 1.425988120  | -3.921169540 | 1.877282290 |
| C | -1.425990280 | -3.921169460 | 1.877290200 |
| C | -2.682838370 | -3.195526710 | 1.877282290 |
| C | -3.914756760 | 1.427065610  | 3.124321740 |
| C | -3.193253740 | 2.676746860  | 3.124322830 |
| C | -0.721503300 | 4.103811610  | 3.124321740 |
| C | 0.721503910  | 4.103812290  | 3.124322830 |
| C | 3.193253450  | 2.676745990  | 3.124321740 |
| C | 3.914757650  | 1.427065430  | 3.124322830 |
| C | 3.914756760  | -1.427065610 | 3.124321740 |
| C | 3.193253740  | -2.676746860 | 3.124322830 |
| C | 0.721503300  | -4.103811610 | 3.124321740 |
| C | -0.721503910 | -4.103812290 | 3.124322830 |
| C | -3.193253450 | -2.676745990 | 3.124321740 |
| C | -3.914757650 | -1.427065430 | 3.124322830 |
| C | -2.673333060 | 3.192814320  | 4.380513970 |
| C | -1.428390950 | 3.911582080  | 4.380522860 |
| C | 1.428391780  | 3.911581500  | 4.380513970 |
| C | 2.673333980  | 3.192813890  | 4.380522860 |
| C | 4.101724840  | 0.718767180  | 4.380513970 |
| C | 4.101724930  | -0.718768190 | 4.380522860 |
| C | 2.673333060  | -3.192814320 | 4.380513970 |
| C | 1.428390950  | -3.911582080 | 4.380522860 |
| C | -1.428391780 | -3.911581500 | 4.380513970 |
| C | -2.673333980 | -3.192813890 | 4.380522860 |
| C | -4.101724840 | -0.718767180 | 4.380513970 |
| C | -4.101724930 | 0.718768190  | 4.380522860 |
| C | -0.725345140 | 4.108937930  | 5.632179920 |
| C | 0.725345850  | 4.108937500  | 5.632191140 |
| C | 3.195772060  | 2.682636280  | 5.632179920 |
| C | 3.921117180  | 1.426300820  | 5.632191140 |
| C | 3.921117200  | -1.426301650 | 5.632179920 |
| C | 3.195771330  | -2.682636680 | 5.632191140 |
| C | 0.725345140  | -4.108937930 | 5.632179920 |
| C | -0.725345850 | -4.108937500 | 5.632191140 |
| C | -3.195772060 | -2.682636280 | 5.632179920 |
| C | -3.921117180 | -1.426300820 | 5.632191140 |
| C | -3.921117200 | 1.426301650  | 5.632179920 |
| C | -3.195771330 | 2.682636680  | 5.632191140 |
| C | 1.424802670  | 3.913110880  | 6.876162410 |
| C | 2.676451140  | 3.190472670  | 6.876167390 |
| C | 4.101254760  | 0.722640130  | 6.876162410 |
| C | 4.101255950  | -0.722638350 | 6.876167390 |
| C | 2.676452090  | -3.190470750 | 6.876162410 |
| C | 1.424804810  | -3.913111020 | 6.876167390 |
| C | -1.424802670 | -3.913110880 | 6.876162410 |
| C | -2.676451140 | -3.190472670 | 6.876167390 |
| C | -4.101254760 | -0.722640130 | 6.876162410 |
| C | -4.101255950 | 0.722638350  | 6.876167390 |
| C | -2.676452090 | 3.190470750  | 6.876162410 |
| C | -1.424804810 | 3.913111020  | 6.876167390 |
| C | 3.181791070  | 2.662375120  | 8.131598290 |
| C | 3.896579750  | 1.424325810  | 8.131594330 |
| C | 3.896580020  | -1.424324330 | 8.131598290 |
| C | 3.181792210  | -2.662374150 | 8.131594330 |
| C | 0.714788950  | -4.086699450 | 8.131598290 |
| C | -0.714787540 | -4.086699960 | 8.131594330 |
| C | -3.181791070 | -2.662375120 | 8.131598290 |
| C | -3.896579750 | -1.424325810 | 8.131594330 |
| C | -3.896580020 | 1.424324330  | 8.131598290 |

|   |              |              |               |
|---|--------------|--------------|---------------|
| C | -3.181792210 | 2.662374150  | 8.131594330   |
| C | -0.714788950 | 4.086699450  | 8.131598290   |
| C | 0.714787540  | 4.086699960  | 8.131594330   |
| C | 4.098515320  | 0.726341090  | 9.392167890   |
| C | 4.098514890  | -0.726341340 | 9.392158840   |
| C | 2.678287500  | -3.186247840 | 9.392167890   |
| C | 1.420227390  | -3.912588680 | 9.392158840   |
| C | -1.420227820 | -3.912588930 | 9.392167890   |
| C | -2.678287500 | -3.186247340 | 9.392158840   |
| C | -4.098515320 | -0.726341090 | 9.392167890   |
| C | -4.098514890 | 0.726341340  | 9.392158840   |
| C | -2.678287500 | 3.186247840  | 9.392167890   |
| C | -1.420227390 | 3.912588680  | 9.392158840   |
| C | 1.420227820  | 3.912588930  | 9.392167890   |
| C | 2.678287500  | 3.186247340  | 9.392158840   |
| C | 3.955959960  | -1.436838280 | 10.632613400  |
| C | 3.222319860  | -2.707541060 | 10.632596750  |
| C | 0.733641530  | -4.144380960 | 10.632613400  |
| C | -0.733639410 | -4.144381390 | 10.632596750  |
| C | -3.222318430 | -2.707542680 | 10.632613400  |
| C | -3.955959270 | -1.436840330 | 10.632596750  |
| C | -3.955959960 | 1.436838280  | 10.632613400  |
| C | -3.222319860 | 2.707541060  | 10.632596750  |
| C | -0.733641530 | 4.144380960  | 10.632613400  |
| C | 0.733639410  | 4.144381390  | 10.632596750  |
| C | 3.222318430  | 2.707542680  | 10.632613400  |
| C | 3.955959270  | 1.436840330  | 10.632596750  |
| C | 2.700617550  | -3.295313710 | 11.850753740  |
| C | 1.503516600  | -3.986457200 | 11.850731960  |
| C | -1.503516610 | -3.986460260 | 11.850753740  |
| C | -2.700614910 | -3.295312170 | 11.850731960  |
| C | -4.204134160 | -0.691146550 | 11.850753740  |
| C | -4.204131510 | 0.691145030  | 11.850731960  |
| C | -2.700617550 | 3.295313710  | 11.850753740  |
| C | -1.503516600 | 3.986457200  | 11.850731960  |
| C | 1.503516610  | 3.986460260  | 11.850753740  |
| C | 2.700614910  | 3.295312170  | 11.850731960  |
| C | 4.204134160  | 0.691146550  | 11.850753740  |
| C | 4.204131510  | -0.691145030 | 11.850731960  |
| H | -4.304562850 | 1.069050650  | -12.807120920 |
| H | -3.078108390 | 3.193332660  | -12.807111660 |
| H | -1.226456400 | 4.262386100  | -12.807120920 |
| H | 1.226453010  | 4.262386400  | -12.807111660 |
| H | 3.078106450  | 3.193335450  | -12.807120920 |
| H | 4.304561400  | 1.069053740  | -12.807111660 |
| H | 4.304562850  | -1.069050650 | -12.807120920 |
| H | 3.078108390  | -3.193332660 | -12.807111660 |
| H | 1.226456400  | -4.262386100 | -12.807120920 |
| H | -1.226453010 | -4.262386400 | -12.807111660 |
| H | -3.078106450 | -3.193335450 | -12.807120920 |
| H | -4.304561400 | -1.069053740 | -12.807111660 |
| H | 3.193332660  | -3.078108390 | 12.807111660  |
| H | 1.069050650  | -4.304562850 | 12.807120920  |
| H | -1.069053740 | -4.304561400 | 12.807111660  |
| H | -3.193335450 | -3.078106450 | 12.807120920  |
| H | -4.262386400 | -1.226453010 | 12.807111660  |
| H | -4.262386100 | 1.226456400  | 12.807120920  |
| H | -3.193332660 | 3.078108390  | 12.807111660  |
| H | -1.069050650 | 4.304562850  | 12.807120920  |
| H | 1.069053740  | 4.304561400  | 12.807111660  |
| H | 3.193335450  | 3.078106450  | 12.807120920  |
| H | 4.262386400  | 1.226453010  | 12.807111660  |
| H | 4.262386100  | -1.226456400 | 12.807120920  |

Nanotube (6,6) u10v6s  
B3LYP/STO-3G Energy: -9501.198813

|   |              |             |               |
|---|--------------|-------------|---------------|
| C | -3.460769040 | 2.485293440 | -12.483581840 |
|---|--------------|-------------|---------------|

|   |              |              |               |
|---|--------------|--------------|---------------|
| C | -2.485293440 | 3.460769040  | -12.483581840 |
| C | 0.421942740  | 4.239760630  | -12.483581840 |
| C | 1.754467190  | 3.882711780  | -12.483581840 |
| C | 3.882711780  | 1.754467190  | -12.483581840 |
| C | 4.239760630  | 0.421942740  | -12.483581840 |
| C | 3.460769040  | -2.485293440 | -12.483581840 |
| C | 2.485293440  | -3.460769040 | -12.483581840 |
| C | -0.421942740 | -4.239760630 | -12.483581840 |
| C | -1.754467190 | -3.882711780 | -12.483581840 |
| C | -3.882711780 | -1.754467190 | -12.483581840 |
| C | -4.239760630 | -0.421942740 | -12.483581840 |
| C | -1.777775150 | 3.810445000  | -11.263137520 |
| C | -0.365624060 | 4.188829750  | -11.263137520 |
| C | 2.411054600  | 3.444820940  | -11.263137520 |
| C | 3.444820940  | 2.411054600  | -11.263137520 |
| C | 4.188829750  | -0.365624060 | -11.263137520 |
| C | 3.810445000  | -1.777775150 | -11.263137520 |
| C | 1.777775150  | -3.810445000 | -11.263137520 |
| C | 0.365624060  | -4.188829750 | -11.263137520 |
| C | -2.411054600 | -3.444820940 | -11.263137520 |
| C | -3.444820940 | -2.411054600 | -11.263137520 |
| C | -4.188829750 | 0.365624060  | -11.263137520 |
| C | -3.810445000 | 1.777775150  | -11.263137520 |
| C | 0.358985540  | 4.148515170  | -10.021618180 |
| C | 1.763366990  | 3.772212290  | -10.021618180 |
| C | 3.772212290  | 1.763366990  | -10.021618180 |
| C | 4.148515170  | 0.358985540  | -10.021618180 |
| C | 3.413226750  | -2.385148180 | -10.021618180 |
| C | 2.385148180  | -3.413226750 | -10.021618180 |
| C | -0.358985540 | -4.148515170 | -10.021618180 |
| C | -1.763366990 | -3.772212290 | -10.021618180 |
| C | -3.772212290 | -1.763366990 | -10.021618180 |
| C | -4.148515170 | -0.358985540 | -10.021618180 |
| C | -3.413226750 | 2.385148180  | -10.021618180 |
| C | -2.385148180 | 3.413226750  | -10.021618180 |
| C | 2.384214600  | 3.394746890  | -8.763445860  |
| C | 3.394746890  | 2.384214600  | -8.763445860  |
| C | 4.132044350  | -0.367416970 | -8.763445860  |
| C | 3.762163860  | -1.747829740 | -8.763445860  |
| C | 1.747829740  | -3.762163860 | -8.763445860  |
| C | 0.367416970  | -4.132044350 | -8.763445860  |
| C | -2.384214600 | -3.394746890 | -8.763445860  |
| C | -3.394746890 | -2.384214600 | -8.763445860  |
| C | -4.132044350 | 0.367416970  | -8.763445860  |
| C | -3.762163860 | 1.747829740  | -8.763445860  |
| C | -1.747829740 | 3.762163860  | -8.763445860  |
| C | -0.367416970 | 4.132044350  | -8.763445860  |
| C | 3.772029690  | 1.755864870  | -7.505706150  |
| C | 4.144605970  | 0.365391260  | -7.505706150  |
| C | 3.406638420  | -2.388741100 | -7.505706150  |
| C | 2.388741100  | -3.406638420 | -7.505706150  |
| C | -0.365391260 | -4.144605970 | -7.505706150  |
| C | -1.755864870 | -3.772029690 | -7.505706150  |
| C | -3.772029690 | -1.755864870 | -7.505706150  |
| C | -4.144605970 | -0.365391260 | -7.505706150  |
| C | -3.406638420 | 2.388741100  | -7.505706150  |
| C | -2.388741100 | 3.406638420  | -7.505706150  |
| C | 0.365391260  | 4.144605970  | -7.505706150  |
| C | 1.755864870  | 3.772029690  | -7.505706150  |
| C | 4.154548360  | -0.362604160 | -6.259056750  |
| C | 3.779246500  | -1.763249770 | -6.259056750  |
| C | 1.763249770  | -3.779246500 | -6.259056750  |
| C | 0.362604160  | -4.154548360 | -6.259056750  |
| C | -2.391298590 | -3.416642340 | -6.259056750  |
| C | -3.416642340 | -2.391298590 | -6.259056750  |
| C | -4.154548360 | 0.362604160  | -6.259056750  |
| C | -3.779246500 | 1.763249770  | -6.259056750  |
| C | -1.763249770 | 3.779246500  | -6.259056750  |
| C | -0.362604160 | 4.154548360  | -6.259056750  |
| C | 2.391298590  | 3.416642340  | -6.259056750  |

|   |              |              |              |
|---|--------------|--------------|--------------|
| C | 3.416642340  | 2.391298590  | -6.259056750 |
| C | 3.408231770  | -2.390739870 | -5.009911440 |
| C | 2.390739870  | -3.408231770 | -5.009911440 |
| C | -0.366325570 | -4.146985230 | -5.009911440 |
| C | -1.756245360 | -3.774557340 | -5.009911440 |
| C | -3.774557340 | -1.756245360 | -5.009911440 |
| C | -4.146985230 | -0.366325570 | -5.009911440 |
| C | -3.408231770 | 2.390739870  | -5.009911440 |
| C | -2.390739870 | 3.408231770  | -5.009911440 |
| C | 0.366325570  | 4.146985230  | -5.009911440 |
| C | 1.756245360  | 3.774557340  | -5.009911440 |
| C | 3.774557340  | 1.756245360  | -5.009911440 |
| C | 4.146985230  | 0.366325570  | -5.009911440 |
| C | 1.754808640  | -3.773835610 | -3.752753140 |
| C | 0.367208950  | -4.145641830 | -3.752753140 |
| C | -2.390833190 | -3.406626660 | -3.752753140 |
| C | -3.406626660 | -2.390833190 | -3.752753140 |
| C | -4.145641830 | 0.367208950  | -3.752753140 |
| C | -3.773835610 | 1.754808640  | -3.752753140 |
| C | -1.754808640 | 3.773835610  | -3.752753140 |
| C | -0.367208950 | 4.145641830  | -3.752753140 |
| C | 2.390833190  | 3.406626660  | -3.752753140 |
| C | 3.406626660  | 2.390833190  | -3.752753140 |
| C | 4.145641830  | -0.367208950 | -3.752753140 |
| C | 3.773835610  | -1.754808640 | -3.752753140 |
| C | -0.363608920 | -4.153719790 | -2.501422140 |
| C | -1.761965330 | -3.779031320 | -2.501422140 |
| C | -3.779031320 | -1.761965330 | -2.501422140 |
| C | -4.153719790 | -0.363608920 | -2.501422140 |
| C | -3.415422400 | 2.391754450  | -2.501422140 |
| C | -2.391754450 | 3.415422400  | -2.501422140 |
| C | 0.363608920  | 4.153719790  | -2.501422140 |
| C | 1.761965330  | 3.779031320  | -2.501422140 |
| C | 3.779031320  | 1.761965330  | -2.501422140 |
| C | 4.153719790  | 0.363608920  | -2.501422140 |
| C | 3.415422400  | -2.391754450 | -2.501422140 |
| C | 2.391754450  | -3.415422400 | -2.501422140 |
| C | -2.391178370 | -3.412254830 | -1.254807180 |
| C | -3.412254830 | -2.391178370 | -1.254807180 |
| C | -4.150688550 | 0.364693790  | -1.254807180 |
| C | -3.776948630 | 1.759510190  | -1.254807180 |
| C | -1.759510190 | 3.776948630  | -1.254807180 |
| C | -0.364693790 | 4.150688550  | -1.254807180 |
| C | 2.391178370  | 3.412254830  | -1.254807180 |
| C | 3.412254830  | 2.391178370  | -1.254807180 |
| C | 4.150688550  | -0.364693790 | -1.254807180 |
| C | 3.776948630  | -1.759510190 | -1.254807180 |
| C | 1.759510190  | -3.776948630 | -1.254807180 |
| C | 0.364693790  | -4.150688550 | -1.254807180 |
| C | -3.772784380 | -1.754104230 | 0.000000000  |
| C | -4.144379230 | -0.367293370 | 0.000000000  |
| C | -3.405491010 | 2.390275000  | 0.000000000  |
| C | -2.390275000 | 3.405491010  | 0.000000000  |
| C | 0.367293370  | 4.144379230  | 0.000000000  |
| C | 1.754104230  | 3.772784380  | 0.000000000  |
| C | 3.772784380  | 1.754104230  | 0.000000000  |
| C | 4.144379230  | 0.367293370  | 0.000000000  |
| C | 3.405491010  | -2.390275000 | 0.000000000  |
| C | 2.390275000  | -3.405491010 | 0.000000000  |
| C | -0.367293370 | -4.144379230 | 0.000000000  |
| C | -1.754104230 | -3.772784380 | 0.000000000  |
| C | -4.150688550 | 0.364693790  | 1.254807180  |
| C | -3.776948630 | 1.759510190  | 1.254807180  |
| C | -1.759510190 | 3.776948630  | 1.254807180  |
| C | -0.364693790 | 4.150688550  | 1.254807180  |
| C | 2.391178370  | 3.412254830  | 1.254807180  |
| C | 3.412254830  | 2.391178370  | 1.254807180  |
| C | 4.150688550  | -0.364693790 | 1.254807180  |
| C | 3.776948630  | -1.759510190 | 1.254807180  |
| C | 1.759510190  | -3.776948630 | 1.254807180  |



|   |              |              |             |
|---|--------------|--------------|-------------|
| C | 0.364693790  | -4.150688550 | 1.254807180 |
| C | -2.391178370 | -3.412254830 | 1.254807180 |
| C | -3.412254830 | -2.391178370 | 1.254807180 |
| C | -3.415422400 | 2.391754450  | 2.501422140 |
| C | -2.391754450 | 3.415422400  | 2.501422140 |
| C | 0.363608920  | 4.153719790  | 2.501422140 |
| C | 1.761965330  | 3.779031320  | 2.501422140 |
| C | 3.779031320  | 1.761965330  | 2.501422140 |
| C | 4.153719790  | 0.363608920  | 2.501422140 |
| C | 3.415422400  | -2.391754450 | 2.501422140 |
| C | 2.391754450  | -3.415422400 | 2.501422140 |
| C | -0.363608920 | -4.153719790 | 2.501422140 |
| C | -1.761965330 | -3.779031320 | 2.501422140 |
| C | -3.779031320 | -1.761965330 | 2.501422140 |
| C | -4.153719790 | -0.363608920 | 2.501422140 |
| C | -1.754808640 | 3.773835610  | 3.752753140 |
| C | -0.367208950 | 4.145641830  | 3.752753140 |
| C | 2.390833190  | 3.406626660  | 3.752753140 |
| C | 3.406626660  | 2.390833190  | 3.752753140 |
| C | 4.145641830  | -0.367208950 | 3.752753140 |
| C | 3.773835610  | -1.754808640 | 3.752753140 |
| C | 1.754808640  | -3.773835610 | 3.752753140 |
| C | 0.367208950  | -4.145641830 | 3.752753140 |
| C | -2.390833190 | -3.406626660 | 3.752753140 |
| C | -3.406626660 | -2.390833190 | 3.752753140 |
| C | -4.145641830 | 0.367208950  | 3.752753140 |
| C | -3.773835610 | 1.754808640  | 3.752753140 |
| C | 0.366325570  | 4.146985230  | 5.009911440 |
| C | 1.756245360  | 3.774557340  | 5.009911440 |
| C | 3.774557340  | 1.756245360  | 5.009911440 |
| C | 4.146985230  | 0.366325570  | 5.009911440 |
| C | 3.408231770  | -2.390739870 | 5.009911440 |
| C | 2.390739870  | -3.408231770 | 5.009911440 |
| C | -0.366325570 | -4.146985230 | 5.009911440 |
| C | -1.756245360 | -3.774557340 | 5.009911440 |
| C | -3.774557340 | -1.756245360 | 5.009911440 |
| C | -4.146985230 | -0.366325570 | 5.009911440 |
| C | -3.408231770 | 2.390739870  | 5.009911440 |
| C | -2.390739870 | 3.408231770  | 5.009911440 |
| C | 2.391298590  | 3.416642340  | 6.259056750 |
| C | 3.416642340  | 2.391298590  | 6.259056750 |
| C | 4.154548360  | -0.362604160 | 6.259056750 |
| C | 3.779246500  | -1.763249770 | 6.259056750 |
| C | 1.763249770  | -3.779246500 | 6.259056750 |
| C | 0.362604160  | -4.154548360 | 6.259056750 |
| C | -2.391298590 | -3.416642340 | 6.259056750 |
| C | -3.416642340 | -2.391298590 | 6.259056750 |
| C | -4.154548360 | 0.362604160  | 6.259056750 |
| C | -3.779246500 | 1.763249770  | 6.259056750 |
| C | -1.763249770 | 3.779246500  | 6.259056750 |
| C | -0.362604160 | 4.154548360  | 6.259056750 |
| C | 3.772029690  | 1.755864870  | 7.505706150 |
| C | 4.144605970  | 0.365391260  | 7.505706150 |
| C | 3.406638420  | -2.388741100 | 7.505706150 |
| C | 2.388741100  | -3.406638420 | 7.505706150 |
| C | -0.365391260 | -4.144605970 | 7.505706150 |
| C | -1.755864870 | -3.772029690 | 7.505706150 |
| C | -3.772029690 | -1.755864870 | 7.505706150 |
| C | -4.144605970 | -0.365391260 | 7.505706150 |
| C | -3.406638420 | 2.388741100  | 7.505706150 |
| C | -2.388741100 | 3.406638420  | 7.505706150 |
| C | 0.365391260  | 4.144605970  | 7.505706150 |
| C | 1.755864870  | 3.772029690  | 7.505706150 |
| C | 4.132044350  | -0.367416970 | 8.763445860 |
| C | 3.762163860  | -1.747829740 | 8.763445860 |
| C | 1.747829740  | -3.762163860 | 8.763445860 |
| C | 0.367416970  | -4.132044350 | 8.763445860 |
| C | -2.384214600 | -3.394746890 | 8.763445860 |
| C | -3.394746890 | -2.384214600 | 8.763445860 |
| C | -4.132044350 | 0.367416970  | 8.763445860 |

|   |              |              |               |
|---|--------------|--------------|---------------|
| C | -3.762163860 | 1.747829740  | 8.763445860   |
| C | -1.747829740 | 3.762163860  | 8.763445860   |
| C | -0.367416970 | 4.132044350  | 8.763445860   |
| C | 2.384214600  | 3.394746890  | 8.763445860   |
| C | 3.394746890  | 2.384214600  | 8.763445860   |
| C | 3.413226750  | -2.385148180 | 10.021618180  |
| C | 2.385148180  | -3.413226750 | 10.021618180  |
| C | -0.358985540 | -4.148515170 | 10.021618180  |
| C | -1.763366990 | -3.772212290 | 10.021618180  |
| C | -3.772212290 | -1.763366990 | 10.021618180  |
| C | -4.148515170 | -0.358985540 | 10.021618180  |
| C | -3.413226750 | 2.385148180  | 10.021618180  |
| C | -2.385148180 | 3.413226750  | 10.021618180  |
| C | 0.358985540  | 4.148515170  | 10.021618180  |
| C | 1.763366990  | 3.772212290  | 10.021618180  |
| C | 3.772212290  | 1.763366990  | 10.021618180  |
| C | 4.148515170  | 0.358985540  | 10.021618180  |
| C | 1.777775150  | -3.810445000 | 11.263137520  |
| C | 0.365624060  | -4.188829750 | 11.263137520  |
| C | -2.411054600 | -3.444820940 | 11.263137520  |
| C | -3.444820940 | -2.411054600 | 11.263137520  |
| C | -4.188829750 | 0.365624060  | 11.263137520  |
| C | -3.810445000 | 1.777775150  | 11.263137520  |
| C | -1.777775150 | 3.810445000  | 11.263137520  |
| C | -0.365624060 | 4.188829750  | 11.263137520  |
| C | 2.411054600  | 3.444820940  | 11.263137520  |
| C | 3.444820940  | 2.411054600  | 11.263137520  |
| C | 4.188829750  | -0.365624060 | 11.263137520  |
| C | 3.810445000  | -1.777775150 | 11.263137520  |
| C | -0.421942740 | -4.239760630 | 12.483581840  |
| C | -1.754467190 | -3.882711780 | 12.483581840  |
| C | -3.882711780 | -1.754467190 | 12.483581840  |
| C | -4.239760630 | -0.421942740 | 12.483581840  |
| C | -3.460769040 | 2.485293440  | 12.483581840  |
| C | -2.485293440 | 3.460769040  | 12.483581840  |
| C | 0.421942740  | 4.239760630  | 12.483581840  |
| C | 1.754467190  | 3.882711780  | 12.483581840  |
| C | 3.882711780  | 1.754467190  | 12.483581840  |
| C | 4.239760630  | 0.421942740  | 12.483581840  |
| C | 3.460769040  | -2.485293440 | 12.483581840  |
| C | 2.485293440  | -3.460769040 | 12.483581840  |
| H | -3.889324730 | 2.153095930  | -13.437912180 |
| H | -2.153095930 | 3.889324730  | -13.437912180 |
| H | -0.080026600 | 4.444801980  | -13.437912180 |
| H | 2.291706060  | 3.809298140  | -13.437912180 |
| H | 3.809298140  | 2.291706060  | -13.437912180 |
| H | 4.444801980  | -0.080026600 | -13.437912180 |
| H | 3.889324730  | -2.153095930 | -13.437912180 |
| H | 2.153095930  | -3.889324730 | -13.437912180 |
| H | 0.080026600  | -4.444801980 | -13.437912180 |
| H | -2.291706060 | -3.809298140 | -13.437912180 |
| H | -3.809298140 | -2.291706060 | -13.437912180 |
| H | -4.444801980 | 0.080026600  | -13.437912180 |
| H | 0.080026600  | -4.444801980 | 13.437912180  |
| H | -2.291706060 | -3.809298140 | 13.437912180  |
| H | -3.809298140 | -2.291706060 | 13.437912180  |
| H | -4.444801980 | 0.080026600  | 13.437912180  |
| H | -3.889324730 | 2.153095930  | 13.437912180  |
| H | -2.153095930 | 3.889324730  | 13.437912180  |
| H | -0.080026600 | 4.444801980  | 13.437912180  |
| H | 2.291706060  | 3.809298140  | 13.437912180  |
| H | 3.809298140  | 2.291706060  | 13.437912180  |
| H | 4.444801980  | -0.080026600 | 13.437912180  |
| H | 3.889324730  | -2.153095930 | 13.437912180  |
| H | 2.153095930  | -3.889324730 | 13.437912180  |

Nanotube (6,6) ullv0s  
B3LYP/STO-3G Energy: -9952.988914

|   |              |              |               |
|---|--------------|--------------|---------------|
| C | -3.994745520 | 1.506152540  | -13.089378510 |
| C | -3.301753180 | 2.706484370  | -13.089550710 |
| C | -0.693006390 | 4.212627370  | -13.089378510 |
| C | 0.693007630  | 4.212644320  | -13.089550710 |
| C | 3.301739120  | 2.706474830  | -13.089378510 |
| C | 3.994760810  | 1.506159950  | -13.089550710 |
| C | 3.994745520  | -1.506152540 | -13.089378510 |
| C | 3.301753180  | -2.706484370 | -13.089550710 |
| C | 0.693006390  | -4.212627370 | -13.089378510 |
| C | -0.693007630 | -4.212644320 | -13.089550710 |
| C | -3.301739120 | -2.706474830 | -13.089378510 |
| C | -3.994760810 | -1.506159950 | -13.089550710 |
| C | -2.713340980 | 3.226240510  | -11.875659710 |
| C | -1.437340210 | 3.962951020  | -11.875849300 |
| C | 1.437335750  | 3.962942470  | -11.875659710 |
| C | 2.713346150  | 3.226248650  | -11.875849300 |
| C | 4.150676730  | 0.736701960  | -11.875659710 |
| C | 4.150686360  | -0.736702370 | -11.875849300 |
| C | 2.713340980  | -3.226240510 | -11.875659710 |
| C | 1.437340210  | -3.962951020 | -11.875849300 |
| C | -1.437335750 | -3.962942470 | -11.875659710 |
| C | -2.713346150 | -3.226248650 | -11.875849300 |
| C | -4.150676730 | -0.736701960 | -11.875659710 |
| C | -4.150686360 | 0.736702370  | -11.875849300 |
| C | -0.725840320 | 4.100034650  | -10.635903940 |
| C | 0.725857080  | 4.100035170  | -10.636036380 |
| C | 3.187814000  | 2.678613480  | -10.635903940 |
| C | 3.913663150  | 1.421406920  | -10.636036380 |
| C | 3.913654320  | -1.421421170 | -10.635903940 |
| C | 3.187806080  | -2.678628260 | -10.636036380 |
| C | 0.725840320  | -4.100034650 | -10.635903940 |
| C | -0.725857080 | -4.100035170 | -10.636036380 |
| C | -3.187814000 | -2.678613480 | -10.635903940 |
| C | -3.913663150 | -1.421406920 | -10.636036380 |
| C | -3.913654320 | 1.421421170  | -10.635903940 |
| C | -3.187806080 | 2.678628260  | -10.636036380 |
| C | 1.424784670  | 3.899944850  | -9.373462790  |
| C | 2.665062120  | 3.183869150  | -9.373512280  |
| C | 4.089843650  | 0.716072710  | -9.373462790  |
| C | 4.089842630  | -0.716076920 | -9.373512280  |
| C | 2.665058980  | -3.183872140 | -9.373462790  |
| C | 1.424780510  | -3.899946080 | -9.373512280  |
| C | -1.424784670 | -3.899944850 | -9.373462790  |
| C | -2.665062120 | -3.183869150 | -9.373512280  |
| C | -4.089843650 | -0.716072710 | -9.373462790  |
| C | -4.089842630 | 0.716076920  | -9.373512280  |
| C | -2.665058980 | 3.183872140  | -9.373462790  |
| C | -1.424780510 | 3.899946080  | -9.373512280  |
| C | 3.194220810  | 2.682395530  | -8.122130910  |
| C | 3.920134420  | 1.425074700  | -8.122126280  |
| C | 3.920133080  | -1.425078600 | -8.122130910  |
| C | 3.194218100  | -2.682398640 | -8.122126280  |
| C | 0.725912260  | -4.107474130 | -8.122130910  |
| C | -0.725916310 | -4.107473340 | -8.122126280  |
| C | -3.194220810 | -2.682395530 | -8.122130910  |
| C | -3.920134420 | -1.425074700 | -8.122126280  |
| C | -3.920133080 | 1.425078600  | -8.122130910  |
| C | -3.194218100 | 2.682398640  | -8.122126280  |
| C | -0.725912260 | 4.107474130  | -8.122130910  |
| C | 0.725916310  | 4.107473340  | -8.122126280  |
| C | 4.108706690  | 0.724462560  | -6.879516810  |
| C | 4.108706990  | -0.724460910 | -6.879487000  |
| C | 2.681756330  | -3.196013090 | -6.879516810  |
| C | 1.426951940  | -3.920475080 | -6.879487000  |
| C | -1.426950360 | -3.920475650 | -6.879516810  |
| C | -2.681755050 | -3.196014170 | -6.879487000  |
| C | -4.108706690 | -0.724462560 | -6.879516810  |
| C | -4.108706990 | 0.724460910  | -6.879487000  |
| C | -2.681756330 | 3.196013090  | -6.879516810  |

|   |              |              |              |
|---|--------------|--------------|--------------|
| C | -1.426951940 | 3.920475080  | -6.879487000 |
| C | 1.426950360  | 3.920475650  | -6.879516810 |
| C | 2.681755050  | 3.196014170  | -6.879487000 |
| C | 3.912817960  | -1.428389730 | -5.624706630 |
| C | 3.193430940  | -2.674403630 | -5.624674480 |
| C | 0.719387180  | -4.102794620 | -5.624706630 |
| C | -0.719386010 | -4.102794140 | -5.624674480 |
| C | -3.193430780 | -2.674404890 | -5.624706630 |
| C | -3.912816950 | -1.428390510 | -5.624674480 |
| C | -3.912817960 | 1.428389730  | -5.624706630 |
| C | -3.193430940 | 2.674403630  | -5.624674480 |
| C | -0.719387180 | 4.102794620  | -5.624706630 |
| C | 0.719386010  | 4.102794140  | -5.624674480 |
| C | 3.193430780  | 2.674404890  | -5.624706630 |
| C | 3.912816950  | 1.428390510  | -5.624674480 |
| C | 2.682877020  | -3.196162140 | -4.372473750 |
| C | 1.426521610  | -3.921520390 | -4.372447810 |
| C | -1.426519100 | -3.921520720 | -4.372473750 |
| C | -2.682875480 | -3.196164150 | -4.372447810 |
| C | -4.109396120 | -0.725358590 | -4.372473750 |
| C | -4.109397090 | 0.725356240  | -4.372447810 |
| C | -2.682877020 | 3.196162140  | -4.372473750 |
| C | -1.426521610 | 3.921520390  | -4.372447810 |
| C | 1.426519100  | 3.921520720  | -4.372473750 |
| C | 2.682875480  | 3.196164150  | -4.372447810 |
| C | 4.109396120  | 0.725358590  | -4.372473750 |
| C | 4.109397090  | -0.725356240 | -4.372447810 |
| C | 0.724665710  | -4.109101390 | -3.128137510 |
| C | -0.724663000 | -4.109101790 | -3.128122820 |
| C | -3.196253340 | -2.682129610 | -3.128137510 |
| C | -3.920918030 | -1.426974330 | -3.128122820 |
| C | -3.920919040 | 1.426971780  | -3.128137510 |
| C | -3.196255040 | 2.682127460  | -3.128122820 |
| C | -0.724665710 | 4.109101390  | -3.128137510 |
| C | 0.724663000  | 4.109101790  | -3.128122820 |
| C | 3.196253340  | 2.682129610  | -3.128137510 |
| C | 3.920918030  | 1.426974330  | -3.128122820 |
| C | 3.920919040  | -1.426971780 | -3.128137510 |
| C | 3.196255040  | -2.682127460 | -3.128122820 |
| C | -1.428387640 | -3.913934730 | -1.874994000 |
| C | -2.675371750 | -3.193987240 | -1.874991000 |
| C | -4.103760730 | -0.719947380 | -1.874994000 |
| C | -4.103759970 | 0.719946280  | -1.874991000 |
| C | -2.675373080 | 3.193987350  | -1.874994000 |
| C | -1.428388220 | 3.913933520  | -1.874991000 |
| C | 1.428387640  | 3.913934730  | -1.874994000 |
| C | 2.675371750  | 3.193987240  | -1.874991000 |
| C | 4.103760730  | 0.719947380  | -1.874994000 |
| C | 4.103759970  | -0.719946280 | -1.874991000 |
| C | 2.675373080  | -3.193987350 | -1.874994000 |
| C | 1.428388220  | -3.913933520 | -1.874991000 |
| C | -3.195818560 | -2.682009070 | -0.622451930 |
| C | -3.920598290 | -1.426656970 | -0.622455180 |
| C | -3.920597270 | 1.426655530  | -0.622451930 |
| C | -3.195820330 | 2.682009230  | -0.622455180 |
| C | -0.724778710 | 4.108664600  | -0.622451930 |
| C | 0.724779600  | 4.108666200  | -0.622455180 |
| C | 3.195818560  | 2.682009070  | -0.622451930 |
| C | 3.920598290  | 1.426656970  | -0.622455180 |
| C | 3.920597270  | -1.426655530 | -0.622451930 |
| C | 3.195820330  | -2.682009230 | -0.622455180 |
| C | 0.724778710  | -4.108664600 | -0.622451930 |
| C | -0.724779600 | -4.108666200 | -0.622455180 |
| C | -4.108666200 | -0.724779600 | 0.622455180  |
| C | -4.108664600 | 0.724778710  | 0.622451930  |
| C | -2.682009230 | 3.195820330  | 0.622455180  |
| C | -1.426655530 | 3.920597270  | 0.622451930  |
| C | 1.426656970  | 3.920598290  | 0.622455180  |
| C | 2.682009070  | 3.195818560  | 0.622451930  |
| C | 4.108666200  | 0.724779600  | 0.622455180  |

|   |              |              |             |
|---|--------------|--------------|-------------|
| C | 4.108664600  | -0.724778710 | 0.622451930 |
| C | 2.682009230  | -3.195820330 | 0.622455180 |
| C | 1.426655530  | -3.920597270 | 0.622451930 |
| C | -1.426656970 | -3.920598290 | 0.622455180 |
| C | -2.682009070 | -3.195818560 | 0.622451930 |
| C | -3.913933520 | 1.428388220  | 1.874991000 |
| C | -3.193987350 | 2.675373080  | 1.874994000 |
| C | -0.719946280 | 4.103759970  | 1.874991000 |
| C | 0.719947380  | 4.103760730  | 1.874994000 |
| C | 3.193987240  | 2.675371750  | 1.874991000 |
| C | 3.913934730  | 1.428387640  | 1.874994000 |
| C | 3.913933520  | -1.428388220 | 1.874991000 |
| C | 3.193987350  | -2.675373080 | 1.874994000 |
| C | 0.719946280  | -4.103759970 | 1.874991000 |
| C | -0.719947380 | -4.103760730 | 1.874994000 |
| C | -3.193987240 | -2.675371750 | 1.874991000 |
| C | -3.913934730 | -1.428387640 | 1.874994000 |
| C | -2.682127460 | 3.196255040  | 3.128122820 |
| C | -1.426971780 | 3.920919040  | 3.128137510 |
| C | 1.426974330  | 3.920918030  | 3.128122820 |
| C | 2.682129610  | 3.196253340  | 3.128137510 |
| C | 4.109101790  | 0.724663000  | 3.128122820 |
| C | 4.109101390  | -0.724665710 | 3.128137510 |
| C | 2.682127460  | -3.196255040 | 3.128122820 |
| C | 1.426971780  | -3.920919040 | 3.128137510 |
| C | -1.426974330 | -3.920918030 | 3.128122820 |
| C | -2.682129610 | -3.196253340 | 3.128137510 |
| C | -4.109101790 | -0.724663000 | 3.128122820 |
| C | -4.109101390 | 0.724665710  | 3.128137510 |
| C | -0.725356240 | 4.109397090  | 4.372447810 |
| C | 0.725358590  | 4.109396120  | 4.372473750 |
| C | 3.196164150  | 2.682875480  | 4.372447810 |
| C | 3.921520720  | 1.426519100  | 4.372473750 |
| C | 3.921520390  | -1.426521610 | 4.372447810 |
| C | 3.196162140  | -2.682877020 | 4.372473750 |
| C | 0.725356240  | -4.109397090 | 4.372447810 |
| C | -0.725358590 | -4.109396120 | 4.372473750 |
| C | -3.196164150 | -2.682875480 | 4.372447810 |
| C | -3.921520720 | -1.426519100 | 4.372473750 |
| C | -3.921520390 | 1.426521610  | 4.372447810 |
| C | -3.196162140 | 2.682877020  | 4.372473750 |
| C | 1.428390510  | 3.912816950  | 5.624674480 |
| C | 2.674404890  | 3.193430780  | 5.624706630 |
| C | 4.102794140  | 0.719386010  | 5.624674480 |
| C | 4.102794620  | -0.719387180 | 5.624706630 |
| C | 2.674403630  | -3.193430940 | 5.624674480 |
| C | 1.428389730  | -3.912817960 | 5.624706630 |
| C | -1.428390510 | -3.912816950 | 5.624674480 |
| C | -2.674404890 | -3.193430780 | 5.624706630 |
| C | -4.102794140 | -0.719386010 | 5.624674480 |
| C | -4.102794620 | 0.719387180  | 5.624706630 |
| C | -2.674403630 | 3.193430940  | 5.624674480 |
| C | -1.428389730 | 3.912817960  | 5.624706630 |
| C | 3.196014170  | 2.681755050  | 6.879487000 |
| C | 3.920475650  | 1.426950360  | 6.879516810 |
| C | 3.920475080  | -1.426951940 | 6.879487000 |
| C | 3.196013090  | -2.681756330 | 6.879516810 |
| C | 0.724460910  | -4.108706990 | 6.879487000 |
| C | -0.724462560 | -4.108706690 | 6.879516810 |
| C | -3.196014170 | -2.681755050 | 6.879487000 |
| C | -3.920475650 | -1.426950360 | 6.879516810 |
| C | -3.920475080 | 1.426951940  | 6.879487000 |
| C | -3.196013090 | 2.681756330  | 6.879516810 |
| C | -0.724460910 | 4.108706990  | 6.879487000 |
| C | 0.724462560  | 4.108706690  | 6.879516810 |
| C | 4.107473340  | 0.725916310  | 8.122126280 |
| C | 4.107474130  | -0.725912260 | 8.122130910 |
| C | 2.682398640  | -3.194218100 | 8.122126280 |
| C | 1.425078600  | -3.920133080 | 8.122130910 |
| C | -1.425074700 | -3.920134420 | 8.122126280 |

|   |              |              |               |
|---|--------------|--------------|---------------|
| C | -2.682395530 | -3.194220810 | 8.122130910   |
| C | -4.107473340 | -0.725916310 | 8.122126280   |
| C | -4.107474130 | 0.725912260  | 8.122130910   |
| C | -2.682398640 | 3.194218100  | 8.122126280   |
| C | -1.425078600 | 3.920133080  | 8.122130910   |
| C | 1.425074700  | 3.920134420  | 8.122126280   |
| C | 2.682395530  | 3.194220810  | 8.122130910   |
| C | 3.899946080  | -1.424780510 | 9.373512280   |
| C | 3.183872140  | -2.665058980 | 9.373462790   |
| C | 0.716076920  | -4.089842630 | 9.373512280   |
| C | -0.716072710 | -4.089843650 | 9.373462790   |
| C | -3.183869150 | -2.665062120 | 9.373512280   |
| C | -3.899944850 | -1.424784670 | 9.373462790   |
| C | -3.899946080 | 1.424780510  | 9.373512280   |
| C | -3.183872140 | 2.665058980  | 9.373462790   |
| C | -0.716076920 | 4.089842630  | 9.373512280   |
| C | 0.716072710  | 4.089843650  | 9.373462790   |
| C | 3.183869150  | 2.665062120  | 9.373512280   |
| C | 3.899944850  | 1.424784670  | 9.373462790   |
| C | 2.678628260  | -3.187806080 | 10.636036380  |
| C | 1.421421170  | -3.913654320 | 10.635903940  |
| C | -1.421406920 | -3.913663150 | 10.636036380  |
| C | -2.678613480 | -3.187814000 | 10.635903940  |
| C | -4.100035170 | -0.725857080 | 10.636036380  |
| C | -4.100034650 | 0.725840320  | 10.635903940  |
| C | -2.678628260 | 3.187806080  | 10.636036380  |
| C | -1.421421170 | 3.913654320  | 10.635903940  |
| C | 1.421406920  | 3.913663150  | 10.636036380  |
| C | 2.678613480  | 3.187814000  | 10.635903940  |
| C | 4.100035170  | 0.725857080  | 10.636036380  |
| C | 4.100034650  | -0.725840320 | 10.635903940  |
| C | 0.736702370  | -4.150686360 | 11.875849300  |
| C | -0.736701960 | -4.150676730 | 11.875659710  |
| C | -3.226248650 | -2.713346150 | 11.875849300  |
| C | -3.962942470 | -1.437335750 | 11.875659710  |
| C | -3.962951020 | 1.437340210  | 11.875849300  |
| C | -3.226240510 | 2.713340980  | 11.875659710  |
| C | -0.736702370 | 4.150686360  | 11.875849300  |
| C | 0.736701960  | 4.150676730  | 11.875659710  |
| C | 3.226248650  | 2.713346150  | 11.875849300  |
| C | 3.962942470  | 1.437335750  | 11.875659710  |
| C | 3.962951020  | -1.437340210 | 11.875849300  |
| C | 3.226240510  | -2.713340980 | 11.875659710  |
| C | -1.506159950 | -3.994760810 | 13.089550710  |
| C | -2.706474830 | -3.301739120 | 13.089378510  |
| C | -4.212644320 | -0.693007630 | 13.089550710  |
| C | -4.212627370 | 0.693006390  | 13.089378510  |
| C | -2.706484370 | 3.301753180  | 13.089550710  |
| C | -1.506152540 | 3.994745520  | 13.089378510  |
| C | 1.506159950  | 3.994760810  | 13.089550710  |
| C | 2.706474830  | 3.301739120  | 13.089378510  |
| C | 4.212644320  | 0.693007630  | 13.089550710  |
| C | 4.212627370  | -0.693006390 | 13.089378510  |
| C | 2.706484370  | -3.301753180 | 13.089550710  |
| C | 1.506152540  | -3.994745520 | 13.089378510  |
| H | -4.311510340 | 1.072285220  | -14.046632800 |
| H | -3.084390650 | 3.197707200  | -14.046574680 |
| H | -1.227128940 | 4.270020090  | -14.046632800 |
| H | 1.227100340  | 4.270014260  | -14.046574680 |
| H | 3.084381410  | 3.197734880  | -14.046632800 |
| H | 4.311490990  | 1.072307060  | -14.046574680 |
| H | 4.311510340  | -1.072285220 | -14.046632800 |
| H | 3.084390650  | -3.197707200 | -14.046574680 |
| H | 1.227128940  | -4.270020090 | -14.046632800 |
| H | -1.227100340 | -4.270014260 | -14.046574680 |
| H | -3.084381410 | -3.197734880 | -14.046632800 |
| H | -4.311490990 | -1.072307060 | -14.046574680 |
| H | -1.072307060 | -4.311490990 | 14.046574680  |
| H | -3.197734880 | -3.084381410 | 14.046632800  |
| H | -4.270014260 | -1.227100340 | 14.046574680  |

|   |              |              |              |
|---|--------------|--------------|--------------|
| H | -4.270020090 | 1.227128940  | 14.046632800 |
| H | -3.197707200 | 3.084390650  | 14.046574680 |
| H | -1.072285220 | 4.311510340  | 14.046632800 |
| H | 1.072307060  | 4.311490990  | 14.046574680 |
| H | 3.197734880  | 3.084381410  | 14.046632800 |
| H | 4.270014260  | 1.227100340  | 14.046574680 |
| H | 4.270020090  | -1.227128940 | 14.046632800 |
| H | 3.197707200  | -3.084390650 | 14.046574680 |
| H | 1.072285220  | -4.311510340 | 14.046632800 |

Nanotube (6,6) ullv6s  
B3LYP/STO-3G Energy: -10404.765641

|   |              |              |               |
|---|--------------|--------------|---------------|
| C | -3.468746590 | 2.490652600  | -13.721254670 |
| C | -2.490652600 | 3.468746590  | -13.721254670 |
| C | 0.422595130  | 4.249348970  | -13.721254670 |
| C | 1.758696370  | 3.891341720  | -13.721254670 |
| C | 3.891341720  | 1.758696370  | -13.721254670 |
| C | 4.249348970  | 0.422595130  | -13.721254670 |
| C | 3.468746590  | -2.490652600 | -13.721254670 |
| C | 2.490652600  | -3.468746590 | -13.721254670 |
| C | -0.422595130 | -4.249348970 | -13.721254670 |
| C | -1.758696370 | -3.891341720 | -13.721254670 |
| C | -3.891341720 | -1.758696370 | -13.721254670 |
| C | -4.249348970 | -0.422595130 | -13.721254670 |
| C | -1.782696710 | 3.815927190  | -12.505022250 |
| C | -0.364102960 | 4.196038240  | -12.505022250 |
| C | 2.413341530  | 3.451824230  | -12.505022250 |
| C | 3.451824230  | 2.413341530  | -12.505022250 |
| C | 4.196038240  | -0.364102960 | -12.505022250 |
| C | 3.815927190  | -1.782696710 | -12.505022250 |
| C | 1.782696710  | -3.815927190 | -12.505022250 |
| C | 0.364102960  | -4.196038240 | -12.505022250 |
| C | -2.413341530 | -3.451824230 | -12.505022250 |
| C | -3.451824230 | -2.413341530 | -12.505022250 |
| C | -4.196038240 | 0.364102960  | -12.505022250 |
| C | -3.815927190 | 1.782696710  | -12.505022250 |
| C | 0.359408710  | 4.147892410  | -11.264953400 |
| C | 1.762689140  | 3.771884560  | -11.264953400 |
| C | 3.771884560  | 1.762689140  | -11.264953400 |
| C | 4.147892410  | 0.359408710  | -11.264953400 |
| C | 3.412475850  | -2.385203280 | -11.264953400 |
| C | 2.385203280  | -3.412475850 | -11.264953400 |
| C | -0.359408710 | -4.147892410 | -11.264953400 |
| C | -1.762689140 | -3.771884560 | -11.264953400 |
| C | -3.771884560 | -1.762689140 | -11.264953400 |
| C | -4.147892410 | -0.359408710 | -11.264953400 |
| C | -3.412475850 | 2.385203280  | -11.264953400 |
| C | -2.385203280 | 3.412475850  | -11.264953400 |
| C | 2.384509160  | 3.395702400  | -10.004356640 |
| C | 3.395702400  | 2.384509160  | -10.004356640 |
| C | 4.133019120  | -0.367194310 | -10.004356640 |
| C | 3.762896710  | -1.748509960 | -10.004356640 |
| C | 1.748509960  | -3.762896710 | -10.004356640 |
| C | 0.367194310  | -4.133019120 | -10.004356640 |
| C | -2.384509160 | -3.395702400 | -10.004356640 |
| C | -3.395702400 | -2.384509160 | -10.004356640 |
| C | -4.133019120 | 0.367194310  | -10.004356640 |
| C | -3.762896710 | 1.748509960  | -10.004356640 |
| C | -1.748509960 | 3.762896710  | -10.004356640 |
| C | -0.367194310 | 4.133019120  | -10.004356640 |
| C | 3.775896960  | 1.760536190  | -8.749928300  |
| C | 4.150290780  | 0.363279410  | -8.749928300  |
| C | 3.412617540  | -2.389754590 | -8.749928300  |
| C | 2.389754590  | -3.412617540 | -8.749928300  |
| C | -0.363279410 | -4.150290780 | -8.749928300  |
| C | -1.760536190 | -3.775896960 | -8.749928300  |
| C | -3.775896960 | -1.760536190 | -8.749928300  |

|   |              |              |              |
|---|--------------|--------------|--------------|
| C | -4.150290780 | -0.363279410 | -8.749928300 |
| C | -3.412617540 | 2.389754590  | -8.749928300 |
| C | -2.389754590 | 3.412617540  | -8.749928300 |
| C | 0.363279410  | 4.150290780  | -8.749928300 |
| C | 1.760536190  | 3.775896960  | -8.749928300 |
| C | 4.156408240  | -0.362876520 | -7.506482580 |
| C | 3.780993390  | -1.763943840 | -7.506482580 |
| C | 1.763943840  | -3.780993390 | -7.506482580 |
| C | 0.362876520  | -4.156408240 | -7.506482580 |
| C | -2.392464410 | -3.418116870 | -7.506482580 |
| C | -3.418116870 | -2.392464410 | -7.506482580 |
| C | -4.156408240 | 0.362876520  | -7.506482580 |
| C | -3.780993390 | 1.763943840  | -7.506482580 |
| C | -1.763943840 | 3.780993390  | -7.506482580 |
| C | -0.362876520 | 4.156408240  | -7.506482580 |
| C | 2.392464410  | 3.418116870  | -7.506482580 |
| C | 3.418116870  | 2.392464410  | -7.506482580 |
| C | 3.408438780  | -2.391852900 | -6.254538330 |
| C | 2.391852900  | -3.408438780 | -6.254538330 |
| C | -0.367185990 | -4.147721020 | -6.254538330 |
| C | -1.755868120 | -3.775624770 | -6.254538330 |
| C | -3.775624770 | -1.755868120 | -6.254538330 |
| C | -4.147721020 | -0.367185990 | -6.254538330 |
| C | -3.408438780 | 2.391852900  | -6.254538330 |
| C | -2.391852900 | 3.408438780  | -6.254538330 |
| C | 0.367185990  | 4.147721020  | -6.254538330 |
| C | 1.755868120  | 3.775624770  | -6.254538330 |
| C | 3.775624770  | 1.755868120  | -6.254538330 |
| C | 4.147721020  | 0.367185990  | -6.254538330 |
| C | 1.759912400  | -3.778275600 | -4.999049770 |
| C | 0.365008950  | -4.152038850 | -4.999049770 |
| C | -2.392126450 | -3.413266650 | -4.999049770 |
| C | -3.413266650 | -2.392126450 | -4.999049770 |
| C | -4.152038850 | 0.365008950  | -4.999049770 |
| C | -3.778275600 | 1.759912400  | -4.999049770 |
| C | -1.759912400 | 3.778275600  | -4.999049770 |
| C | -0.365008950 | 4.152038850  | -4.999049770 |
| C | 2.392126450  | 3.413266650  | -4.999049770 |
| C | 3.413266650  | 2.392126450  | -4.999049770 |
| C | 4.152038850  | -0.365008950 | -4.999049770 |
| C | 3.778275600  | -1.759912400 | -4.999049770 |
| C | -0.362903330 | -4.156884560 | -3.752957930 |
| C | -1.764158770 | -3.781419300 | -3.752957930 |
| C | -3.781419300 | -1.764158770 | -3.752957930 |
| C | -4.156884560 | -0.362903330 | -3.752957930 |
| C | -3.418515960 | 2.392725790  | -3.752957930 |
| C | -2.392725790 | 3.418515960  | -3.752957930 |
| C | 0.362903330  | 4.156884560  | -3.752957930 |
| C | 1.764158770  | 3.781419300  | -3.752957930 |
| C | 3.781419300  | 1.764158770  | -3.752957930 |
| C | 4.156884560  | 0.362903330  | -3.752957930 |
| C | 3.418515960  | -2.392725790 | -3.752957930 |
| C | 2.392725790  | -3.418515960 | -3.752957930 |
| C | -2.392192050 | -3.410344450 | -2.503298400 |
| C | -3.410344450 | -2.392192050 | -2.503298400 |
| C | -4.149540950 | 0.366526860  | -2.503298400 |
| C | -3.776871310 | 1.757348900  | -2.503298400 |
| C | -1.757348900 | 3.776871310  | -2.503298400 |
| C | -0.366526860 | 4.149540950  | -2.503298400 |
| C | 2.392192050  | 3.410344450  | -2.503298400 |
| C | 3.410344450  | 2.392192050  | -2.503298400 |
| C | 4.149540950  | -0.366526860 | -2.503298400 |
| C | 3.776871310  | -1.757348900 | -2.503298400 |
| C | 1.757348900  | -3.776871310 | -2.503298400 |
| C | 0.366526860  | -4.149540950 | -2.503298400 |
| C | -3.777243140 | -1.758603320 | -1.247864340 |
| C | -4.150490170 | -0.365626420 | -1.247864340 |
| C | -3.411616720 | 2.391886850  | -1.247864340 |
| C | -2.391886850 | 3.411616720  | -1.247864340 |
| C | 0.365626420  | 4.150490170  | -1.247864340 |



|   |              |              |              |
|---|--------------|--------------|--------------|
| C | 1.758603320  | 3.777243140  | -1.247864340 |
| C | 3.777243140  | 1.758603320  | -1.247864340 |
| C | 4.150490170  | 0.365626420  | -1.247864340 |
| C | 3.411616720  | -2.391886850 | -1.247864340 |
| C | 2.391886850  | -3.411616720 | -1.247864340 |
| C | -0.365626420 | -4.150490170 | -1.247864340 |
| C | -1.758603320 | -3.777243140 | -1.247864340 |
| C | -4.156250580 | 0.362629070  | 0.000000000  |
| C | -3.780733120 | 1.764079310  | 0.000000000  |
| C | -1.764079310 | 3.780733120  | 0.000000000  |
| C | -0.362629070 | 4.156250580  | 0.000000000  |
| C | 2.392171270  | 3.418104050  | 0.000000000  |
| C | 3.418104050  | 2.392171270  | 0.000000000  |
| C | 4.156250580  | -0.362629070 | 0.000000000  |
| C | 3.780733120  | -1.764079310 | 0.000000000  |
| C | 1.764079310  | -3.780733120 | 0.000000000  |
| C | 0.362629070  | -4.156250580 | 0.000000000  |
| C | -2.392171270 | -3.418104050 | 0.000000000  |
| C | -3.418104050 | -2.392171270 | 0.000000000  |
| C | -3.411616720 | 2.391886850  | 1.247864340  |
| C | -2.391886850 | 3.411616720  | 1.247864340  |
| C | 0.365626420  | 4.150490170  | 1.247864340  |
| C | 1.758603320  | 3.777243140  | 1.247864340  |
| C | 3.777243140  | 1.758603320  | 1.247864340  |
| C | 4.150490170  | 0.365626420  | 1.247864340  |
| C | 3.411616720  | -2.391886850 | 1.247864340  |
| C | 2.391886850  | -3.411616720 | 1.247864340  |
| C | -0.365626420 | -4.150490170 | 1.247864340  |
| C | -1.758603320 | -3.777243140 | 1.247864340  |
| C | -3.777243140 | -1.758603320 | 1.247864340  |
| C | -4.150490170 | -0.365626420 | 1.247864340  |
| C | -1.757348900 | 3.776871310  | 2.503298400  |
| C | -0.366526860 | 4.149540950  | 2.503298400  |
| C | 2.392192050  | 3.410344450  | 2.503298400  |
| C | 3.410344450  | 2.392192050  | 2.503298400  |
| C | 4.149540950  | -0.366526860 | 2.503298400  |
| C | 3.776871310  | -1.757348900 | 2.503298400  |
| C | 1.757348900  | -3.776871310 | 2.503298400  |
| C | 0.366526860  | -4.149540950 | 2.503298400  |
| C | -2.392192050 | -3.410344450 | 2.503298400  |
| C | -3.410344450 | -2.392192050 | 2.503298400  |
| C | -4.149540950 | 0.366526860  | 2.503298400  |
| C | -3.776871310 | 1.757348900  | 2.503298400  |
| C | 0.362903330  | 4.156884560  | 3.752957930  |
| C | 1.764158770  | 3.781419300  | 3.752957930  |
| C | 3.781419300  | 1.764158770  | 3.752957930  |
| C | 4.156884560  | 0.362903330  | 3.752957930  |
| C | 3.418515960  | -2.392725790 | 3.752957930  |
| C | 2.392725790  | -3.418515960 | 3.752957930  |
| C | -0.362903330 | -4.156884560 | 3.752957930  |
| C | -1.764158770 | -3.781419300 | 3.752957930  |
| C | -3.781419300 | -1.764158770 | 3.752957930  |
| C | -4.156884560 | -0.362903330 | 3.752957930  |
| C | -3.418515960 | 2.392725790  | 3.752957930  |
| C | -2.392725790 | 3.418515960  | 3.752957930  |
| C | 2.392126450  | 3.413266650  | 4.999049770  |
| C | 3.413266650  | 2.392126450  | 4.999049770  |
| C | 4.152038850  | -0.365008950 | 4.999049770  |
| C | 3.778275600  | -1.759912400 | 4.999049770  |
| C | 1.759912400  | -3.778275600 | 4.999049770  |
| C | 0.365008950  | -4.152038850 | 4.999049770  |
| C | -2.392126450 | -3.413266650 | 4.999049770  |
| C | -3.413266650 | -2.392126450 | 4.999049770  |
| C | -4.152038850 | 0.365008950  | 4.999049770  |
| C | -3.778275600 | 1.759912400  | 4.999049770  |
| C | -1.759912400 | 3.778275600  | 4.999049770  |
| C | -0.365008950 | 4.152038850  | 4.999049770  |
| C | 3.775624770  | 1.755868120  | 6.254538330  |
| C | 4.147721020  | 0.367185990  | 6.254538330  |
| C | 3.408438780  | -2.391852900 | 6.254538330  |

|   |              |              |              |
|---|--------------|--------------|--------------|
| C | 2.391852900  | -3.408438780 | 6.254538330  |
| C | -0.367185990 | -4.147721020 | 6.254538330  |
| C | -1.755868120 | -3.775624770 | 6.254538330  |
| C | -3.775624770 | -1.755868120 | 6.254538330  |
| C | -4.147721020 | -0.367185990 | 6.254538330  |
| C | -3.408438780 | 2.391852900  | 6.254538330  |
| C | -2.391852900 | 3.408438780  | 6.254538330  |
| C | 0.367185990  | 4.147721020  | 6.254538330  |
| C | 1.755868120  | 3.775624770  | 6.254538330  |
| C | 4.156408240  | -0.362876520 | 7.506482580  |
| C | 3.780993390  | -1.763943840 | 7.506482580  |
| C | 1.763943840  | -3.780993390 | 7.506482580  |
| C | 0.362876520  | -4.156408240 | 7.506482580  |
| C | -2.392464410 | -3.418116870 | 7.506482580  |
| C | -3.418116870 | -2.392464410 | 7.506482580  |
| C | -4.156408240 | 0.362876520  | 7.506482580  |
| C | -3.780993390 | 1.763943840  | 7.506482580  |
| C | -1.763943840 | 3.780993390  | 7.506482580  |
| C | -0.362876520 | 4.156408240  | 7.506482580  |
| C | 2.392464410  | 3.418116870  | 7.506482580  |
| C | 3.418116870  | 2.392464410  | 7.506482580  |
| C | 3.412617540  | -2.389754590 | 8.749928300  |
| C | 2.389754590  | -3.412617540 | 8.749928300  |
| C | -0.363279410 | -4.150290780 | 8.749928300  |
| C | -1.760536190 | -3.775896960 | 8.749928300  |
| C | -3.775896960 | -1.760536190 | 8.749928300  |
| C | -4.150290780 | -0.363279410 | 8.749928300  |
| C | -3.412617540 | 2.389754590  | 8.749928300  |
| C | -2.389754590 | 3.412617540  | 8.749928300  |
| C | 0.363279410  | 4.150290780  | 8.749928300  |
| C | 1.760536190  | 3.775896960  | 8.749928300  |
| C | 3.775896960  | 1.760536190  | 8.749928300  |
| C | 4.150290780  | 0.363279410  | 8.749928300  |
| C | 1.748509960  | -3.762896710 | 10.004356640 |
| C | 0.367194310  | -4.133019120 | 10.004356640 |
| C | -2.384509160 | -3.395702400 | 10.004356640 |
| C | -3.395702400 | -2.384509160 | 10.004356640 |
| C | -4.133019120 | 0.367194310  | 10.004356640 |
| C | -3.762896710 | 1.748509960  | 10.004356640 |
| C | -1.748509960 | 3.762896710  | 10.004356640 |
| C | -0.367194310 | 4.133019120  | 10.004356640 |
| C | 2.384509160  | 3.395702400  | 10.004356640 |
| C | 3.395702400  | 2.384509160  | 10.004356640 |
| C | 4.133019120  | -0.367194310 | 10.004356640 |
| C | 3.762896710  | -1.748509960 | 10.004356640 |
| C | -0.359408710 | -4.147892410 | 11.264953400 |
| C | -1.762689140 | -3.771884560 | 11.264953400 |
| C | -3.771884560 | -1.762689140 | 11.264953400 |
| C | -4.147892410 | -0.359408710 | 11.264953400 |
| C | -3.412475850 | 2.385203280  | 11.264953400 |
| C | -2.385203280 | 3.412475850  | 11.264953400 |
| C | 0.359408710  | 4.147892410  | 11.264953400 |
| C | 1.762689140  | 3.771884560  | 11.264953400 |
| C | 3.771884560  | 1.762689140  | 11.264953400 |
| C | 4.147892410  | 0.359408710  | 11.264953400 |
| C | 3.412475850  | -2.385203280 | 11.264953400 |
| C | 2.385203280  | -3.412475850 | 11.264953400 |
| C | -2.413341530 | -3.451824230 | 12.505022250 |
| C | -3.451824230 | -2.413341530 | 12.505022250 |
| C | -4.196038240 | 0.364102960  | 12.505022250 |
| C | -3.815927190 | 1.782696710  | 12.505022250 |
| C | -1.782696710 | 3.815927190  | 12.505022250 |
| C | -0.364102960 | 4.196038240  | 12.505022250 |
| C | 2.413341530  | 3.451824230  | 12.505022250 |
| C | 3.451824230  | 2.413341530  | 12.505022250 |
| C | 4.196038240  | -0.364102960 | 12.505022250 |
| C | 3.815927190  | -1.782696710 | 12.505022250 |
| C | 1.782696710  | -3.815927190 | 12.505022250 |
| C | 0.364102960  | -4.196038240 | 12.505022250 |
| C | -3.891341720 | -1.758696370 | 13.721254670 |

|   |              |              |               |
|---|--------------|--------------|---------------|
| C | -4.249348970 | -0.422595130 | 13.721254670  |
| C | -3.468746590 | 2.490652600  | 13.721254670  |
| C | -2.490652600 | 3.468746590  | 13.721254670  |
| C | 0.422595130  | 4.249348970  | 13.721254670  |
| C | 1.758696370  | 3.891341720  | 13.721254670  |
| C | 3.891341720  | 1.758696370  | 13.721254670  |
| C | 4.249348970  | 0.422595130  | 13.721254670  |
| C | 3.468746590  | -2.490652600 | 13.721254670  |
| C | 2.490652600  | -3.468746590 | 13.721254670  |
| C | -0.422595130 | -4.249348970 | 13.721254670  |
| C | -1.758696370 | -3.891341720 | 13.721254670  |
| H | -3.895034900 | 2.158915750  | -14.676676820 |
| H | -2.158915750 | 3.895034900  | -14.676676820 |
| H | -0.077841570 | 4.452657050  | -14.676676820 |
| H | 2.293741300  | 3.817193330  | -14.676676820 |
| H | 3.817193330  | 2.293741300  | -14.676676820 |
| H | 4.452657050  | -0.077841570 | -14.676676820 |
| H | 3.895034900  | -2.158915750 | -14.676676820 |
| H | 2.158915750  | -3.895034900 | -14.676676820 |
| H | 0.077841570  | -4.452657050 | -14.676676820 |
| H | -2.293741300 | -3.817193330 | -14.676676820 |
| H | -3.817193330 | -2.293741300 | -14.676676820 |
| H | -4.452657050 | 0.077841570  | -14.676676820 |
| H | -3.817193330 | -2.293741300 | 14.676676820  |
| H | -4.452657050 | 0.077841570  | 14.676676820  |
| H | -3.895034900 | 2.158915750  | 14.676676820  |
| H | -2.158915750 | 3.895034900  | 14.676676820  |
| H | -0.077841570 | 4.452657050  | 14.676676820  |
| H | 2.293741300  | 3.817193330  | 14.676676820  |
| H | 3.817193330  | 2.293741300  | 14.676676820  |
| H | 4.452657050  | -0.077841570 | 14.676676820  |
| H | 3.895034900  | -2.158915750 | 14.676676820  |
| H | 2.158915750  | -3.895034900 | 14.676676820  |
| H | 0.077841570  | -4.452657050 | 14.676676820  |
| H | -2.293741300 | -3.817193330 | 14.676676820  |

Nanotube (6,6) u12v0s  
B3LYP/STO-3G Energy: -10856.533290

|   |              |              |               |
|---|--------------|--------------|---------------|
| C | -3.995835940 | 1.509744820  | -14.352894950 |
| C | -3.305409410 | 2.705641770  | -14.353095860 |
| C | -0.690440600 | 4.215367840  | -14.352894950 |
| C | 0.690449800  | 4.215389400  | -14.353095860 |
| C | 3.305395340  | 2.705623020  | -14.352894950 |
| C | 3.995859210  | 1.509747630  | -14.353095860 |
| C | 3.995835940  | -1.509744820 | -14.352894950 |
| C | 3.305409410  | -2.705641770 | -14.353095860 |
| C | 0.690440600  | -4.215367840 | -14.352894950 |
| C | -0.690449800 | -4.215389400 | -14.353095860 |
| C | -3.305395340 | -2.705623020 | -14.352894950 |
| C | -3.995859210 | -1.509747630 | -14.353095860 |
| C | -2.705909210 | 3.222857810  | -13.134677280 |
| C | -1.438127090 | 3.954825530  | -13.134899760 |
| C | 1.438122130  | 3.954815020  | -13.134677280 |
| C | 2.705915840  | 3.222867360  | -13.134899760 |
| C | 4.144031340  | 0.731957210  | -13.134677280 |
| C | 4.144042920  | -0.731958170 | -13.134899760 |
| C | 2.705909210  | -3.222857810 | -13.134677280 |
| C | 1.438127090  | -3.954825530 | -13.134899760 |
| C | -1.438122130 | -3.954815020 | -13.134677280 |
| C | -2.705915840 | -3.222867360 | -13.134899760 |
| C | -4.144031340 | -0.731957210 | -13.134677280 |
| C | -4.144042920 | 0.731958170  | -13.134899760 |
| C | -0.726777050 | 4.098524660  | -11.893603890 |
| C | 0.726801430  | 4.098523620  | -11.893762520 |
| C | 3.186037950  | 2.678669720  | -11.893603890 |
| C | 3.912826280  | 1.419833310  | -11.893762520 |
| C | 3.912815000  | -1.419854940 | -11.893603890 |

|   |              |              |               |
|---|--------------|--------------|---------------|
| C | 3.186024860  | -2.678690310 | -11.893762520 |
| C | 0.726777050  | -4.098524660 | -11.893603890 |
| C | -0.726801430 | -4.098523620 | -11.893762520 |
| C | -3.186037950 | -2.678669720 | -11.893603890 |
| C | -3.912826280 | -1.419833310 | -11.893762520 |
| C | -3.912815000 | 1.419854940  | -11.893603890 |
| C | -3.186024860 | 2.678690310  | -11.893762520 |
| C | 1.423918500  | 3.895200320  | -10.635011220 |
| C | 2.661394680  | 3.180742390  | -10.635045970 |
| C | 4.085301680  | 0.714450560  | -10.635011220 |
| C | 4.085301050  | -0.714464210 | -10.635045970 |
| C | 2.661383170  | -3.180749750 | -10.635011220 |
| C | 1.423906370  | -3.895206600 | -10.635045970 |
| C | -1.423918500 | -3.895200320 | -10.635011220 |
| C | -2.661394680 | -3.180742390 | -10.635045970 |
| C | -4.085301680 | -0.714450560 | -10.635011220 |
| C | -4.085301050 | 0.714464210  | -10.635045970 |
| C | -2.661383170 | 3.180749750  | -10.635011220 |
| C | -1.423906370 | 3.895206600  | -10.635045970 |
| C | 3.189089820  | 2.673172750  | -9.378316350  |
| C | 3.909586430  | 1.425232690  | -9.378244320  |
| C | 3.909580420  | -1.425246430 | -9.378316350  |
| C | 3.189080930  | -2.673184830 | -9.378244320  |
| C | 0.720490600  | -4.098419170 | -9.378316350  |
| C | -0.720505500 | -4.098417510 | -9.378244320  |
| C | -3.189089820 | -2.673172750 | -9.378316350  |
| C | -3.909586430 | -1.425232690 | -9.378244320  |
| C | -3.909580420 | 1.425246430  | -9.378316350  |
| C | -3.189080930 | 2.673184830  | -9.378244320  |
| C | -0.720490600 | 4.098419170  | -9.378316350  |
| C | 0.720505500  | 4.098417510  | -9.378244320  |
| C | 4.108266390  | 0.725169140  | -8.132977060  |
| C | 4.108265670  | -0.725171420 | -8.132852860  |
| C | 2.682148090  | -3.195278490 | -8.132977060  |
| C | 1.426115960  | -3.920448140 | -8.132852860  |
| C | -1.426118300 | -3.920447630 | -8.132977060  |
| C | -2.682149710 | -3.195276720 | -8.132852860  |
| C | -4.108266390 | -0.725169140 | -8.132977060  |
| C | -4.108265670 | 0.725171420  | -8.132852860  |
| C | -2.682148090 | 3.195278490  | -8.132977060  |
| C | -1.426115960 | 3.920448140  | -8.132852860  |
| C | 1.426118300  | 3.920447630  | -8.132977060  |
| C | 2.682149710  | 3.195276720  | -8.132852860  |
| C | 3.911852690  | -1.427866380 | -6.883611260  |
| C | 3.192499070  | -2.673825630 | -6.883503280  |
| C | 0.719357790  | -4.101697000 | -6.883611260  |
| C | -0.719351390 | -4.101698110 | -6.883503280  |
| C | -3.192494910 | -2.673830620 | -6.883611260  |
| C | -3.911850460 | -1.427872480 | -6.883503280  |
| C | -3.911852690 | 1.427866380  | -6.883611260  |
| C | -3.192499070 | 2.673825630  | -6.883503280  |
| C | -0.719357790 | 4.101697000  | -6.883611260  |
| C | 0.719351390  | 4.101698110  | -6.883503280  |
| C | 3.192494910  | 2.673830620  | -6.883611260  |
| C | 3.911850460  | 1.427872480  | -6.883503280  |
| C | 2.673390080  | -3.191958040 | -5.627091670  |
| C | 1.427625770  | -3.911200920 | -5.627034820  |
| C | -1.427621710 | -3.911202750 | -5.627091670  |
| C | -2.673386470 | -3.191960640 | -5.627034820  |
| C | -4.101011790 | -0.719244710 | -5.627091670  |
| C | -4.101012240 | 0.719240270  | -5.627034820  |
| C | -2.673390080 | 3.191958040  | -5.627091670  |
| C | -1.427625770 | 3.911200920  | -5.627034820  |
| C | 1.427621710  | 3.911202750  | -5.627091670  |
| C | 2.673386470  | 3.191960640  | -5.627034820  |
| C | 4.101011790  | 0.719244710  | -5.627091670  |
| C | 4.101012240  | -0.719240270 | -5.627034820  |
| C | 0.724560690  | -4.107526310 | -4.377322890  |
| C | -0.724555700 | -4.107526590 | -4.377317280  |
| C | -3.194941790 | -2.681251120 | -4.377322890  |

|   |              |              |              |
|---|--------------|--------------|--------------|
| C | -3.919500220 | -1.426279660 | -4.377317280 |
| C | -3.919502480 | 1.426275200  | -4.377322890 |
| C | -3.194944530 | 2.681246940  | -4.377317280 |
| C | -0.724560690 | 4.107526310  | -4.377322890 |
| C | 0.724555700  | 4.107526590  | -4.377317280 |
| C | 3.194941790  | 2.681251120  | -4.377322890 |
| C | 3.919500220  | 1.426279660  | -4.377317280 |
| C | 3.919502480  | -1.426275200 | -4.377322890 |
| C | 3.194944530  | -2.681246940 | -4.377317280 |
| C | -1.427254190 | -3.914960530 | -3.130346720 |
| C | -2.676826520 | -3.193520610 | -3.130379030 |
| C | -4.104082370 | -0.721441880 | -3.130346720 |
| C | -4.104083230 | 0.721439470  | -3.130379030 |
| C | -2.676828180 | 3.193518650  | -3.130346720 |
| C | -1.427256710 | 3.914960070  | -3.130379030 |
| C | 1.427254190  | 3.914960530  | -3.130346720 |
| C | 2.676826520  | 3.193520610  | -3.130379030 |
| C | 4.104082370  | 0.721441880  | -3.130346720 |
| C | 4.104083230  | -0.721439470 | -3.130379030 |
| C | 2.676828180  | -3.193518650 | -3.130346720 |
| C | 1.427256710  | -3.914960070 | -3.130379030 |
| C | -3.191660970 | -2.672130380 | -1.875386870 |
| C | -3.909962690 | -1.427995360 | -1.875440350 |
| C | -3.909963270 | 1.427994290  | -1.875386870 |
| C | -3.191661610 | 2.672129340  | -1.875440350 |
| C | -0.718302310 | 4.100124670  | -1.875386870 |
| C | 0.718301090  | 4.100124700  | -1.875440350 |
| C | 3.191660970  | 2.672130380  | -1.875386870 |
| C | 3.909962690  | 1.427995360  | -1.875440350 |
| C | 3.909963270  | -1.427994290 | -1.875386870 |
| C | 3.191661610  | -2.672129340 | -1.875440350 |
| C | 0.718302310  | -4.100124670 | -1.875386870 |
| C | -0.718301090 | -4.100124700 | -1.875440350 |
| C | -4.105523790 | -0.723211850 | -0.623084710 |
| C | -4.105523300 | 0.723210770  | -0.623149770 |
| C | -2.679081730 | 3.193881970  | -0.623084710 |
| C | -1.426442750 | 3.917092860  | -0.623149770 |
| C | 1.426442060  | 3.917093820  | -0.623084710 |
| C | 2.679080550  | 3.193882090  | -0.623149770 |
| C | 4.105523790  | 0.723211850  | -0.623084710 |
| C | 4.105523300  | -0.723210770 | -0.623149770 |
| C | 2.679081730  | -3.193881970 | -0.623084710 |
| C | 1.426442750  | -3.917092860 | -0.623149770 |
| C | -1.426442060 | -3.917093820 | -0.623084710 |
| C | -2.679080550 | -3.193882090 | -0.623149770 |
| C | -3.917092860 | 1.426442750  | 0.623149770  |
| C | -3.193881970 | 2.679081730  | 0.623084710  |
| C | -0.723210770 | 4.105523300  | 0.623149770  |
| C | 0.723211850  | 4.105523790  | 0.623084710  |
| C | 3.193882090  | 2.679080550  | 0.623149770  |
| C | 3.917093820  | 1.426442060  | 0.623084710  |
| C | 3.917092860  | -1.426442750 | 0.623149770  |
| C | 3.193881970  | -2.679081730 | 0.623084710  |
| C | 0.723210770  | -4.105523300 | 0.623149770  |
| C | -0.723211850 | -4.105523790 | 0.623084710  |
| C | -3.193882090 | -2.679080550 | 0.623149770  |
| C | -3.917093820 | -1.426442060 | 0.623084710  |
| C | -2.672129340 | 3.191661610  | 1.875440350  |
| C | -1.427994290 | 3.909963270  | 1.875386870  |
| C | 1.427995360  | 3.909962690  | 1.875440350  |
| C | 2.672130380  | 3.191660970  | 1.875386870  |
| C | 4.100124700  | 0.718301090  | 1.875440350  |
| C | 4.100124670  | -0.718302310 | 1.875386870  |
| C | 2.672129340  | -3.191661610 | 1.875440350  |
| C | 1.427994290  | -3.909963270 | 1.875386870  |
| C | -1.427995360 | -3.909962690 | 1.875440350  |
| C | -2.672130380 | -3.191660970 | 1.875386870  |
| C | -4.100124700 | -0.718301090 | 1.875440350  |
| C | -4.100124670 | 0.718302310  | 1.875386870  |
| C | -0.721439470 | 4.104083230  | 3.130379030  |

|   |              |              |             |
|---|--------------|--------------|-------------|
| C | 0.721441880  | 4.104082370  | 3.130346720 |
| C | 3.193520610  | 2.676826520  | 3.130379030 |
| C | 3.914960530  | 1.427254190  | 3.130346720 |
| C | 3.914960070  | -1.427256710 | 3.130379030 |
| C | 3.193518650  | -2.676828180 | 3.130346720 |
| C | 0.721439470  | -4.104083230 | 3.130379030 |
| C | -0.721441880 | -4.104082370 | 3.130346720 |
| C | -3.193520610 | -2.676826520 | 3.130379030 |
| C | -3.914960530 | -1.427254190 | 3.130346720 |
| C | -3.914960070 | 1.427256710  | 3.130379030 |
| C | -3.193518650 | 2.676828180  | 3.130346720 |
| C | 1.426279660  | 3.919500220  | 4.377317280 |
| C | 2.681251120  | 3.194941790  | 4.377322890 |
| C | 4.107526590  | 0.724555700  | 4.377317280 |
| C | 4.107526310  | -0.724560690 | 4.377322890 |
| C | 2.681246940  | -3.194944530 | 4.377317280 |
| C | 1.426275200  | -3.919502480 | 4.377322890 |
| C | -1.426279660 | -3.919500220 | 4.377317280 |
| C | -2.681251120 | -3.194941790 | 4.377322890 |
| C | -4.107526590 | -0.724555700 | 4.377317280 |
| C | -4.107526310 | 0.724560690  | 4.377322890 |
| C | -2.681246940 | 3.194944530  | 4.377317280 |
| C | -1.426275200 | 3.919502480  | 4.377322890 |
| C | 3.191960640  | 2.673386470  | 5.627034820 |
| C | 3.911202750  | 1.427621710  | 5.627091670 |
| C | 3.911200920  | -1.427625770 | 5.627034820 |
| C | 3.191958040  | -2.673390080 | 5.627091670 |
| C | 0.719240270  | -4.101012240 | 5.627034820 |
| C | -0.719244710 | -4.101011790 | 5.627091670 |
| C | -3.191960640 | -2.673386470 | 5.627034820 |
| C | -3.911202750 | -1.427621710 | 5.627091670 |
| C | -3.911200920 | 1.427625770  | 5.627034820 |
| C | -3.191958040 | 2.673390080  | 5.627091670 |
| C | -0.719240270 | 4.101012240  | 5.627034820 |
| C | 0.719244710  | 4.101011790  | 5.627091670 |
| C | 4.101698110  | 0.719351390  | 6.883503280 |
| C | 4.101697000  | -0.719357790 | 6.883611260 |
| C | 2.673825630  | -3.192499070 | 6.883503280 |
| C | 1.427866380  | -3.911852690 | 6.883611260 |
| C | -1.427872480 | -3.911850460 | 6.883503280 |
| C | -2.673830620 | -3.192494910 | 6.883611260 |
| C | -4.101698110 | -0.719351390 | 6.883503280 |
| C | -4.101697000 | 0.719357790  | 6.883611260 |
| C | -2.673825630 | 3.192499070  | 6.883503280 |
| C | -1.427866380 | 3.911852690  | 6.883611260 |
| C | 1.427872480  | 3.911850460  | 6.883503280 |
| C | 2.673830620  | 3.192494910  | 6.883611260 |
| C | 3.920448140  | -1.426115960 | 8.132852860 |
| C | 3.195278490  | -2.682148090 | 8.132977060 |
| C | 0.725171420  | -4.108265670 | 8.132852860 |
| C | -0.725169140 | -4.108266390 | 8.132977060 |
| C | -3.195276720 | -2.682149710 | 8.132852860 |
| C | -3.920447630 | -1.426118300 | 8.132977060 |
| C | -3.920448140 | 1.426115960  | 8.132852860 |
| C | -3.195278490 | 2.682148090  | 8.132977060 |
| C | -0.725171420 | 4.108265670  | 8.132852860 |
| C | 0.725169140  | 4.108266390  | 8.132977060 |
| C | 3.195276720  | 2.682149710  | 8.132852860 |
| C | 3.920447630  | 1.426118300  | 8.132977060 |
| C | 2.673184830  | -3.189080930 | 9.378244320 |
| C | 1.425246430  | -3.909580420 | 9.378316350 |
| C | -1.425232690 | -3.909586430 | 9.378244320 |
| C | -2.673172750 | -3.189089820 | 9.378316350 |
| C | -4.098417510 | -0.720505500 | 9.378244320 |
| C | -4.098419170 | 0.720490600  | 9.378316350 |
| C | -2.673184830 | 3.189080930  | 9.378244320 |
| C | -1.425246430 | 3.909580420  | 9.378316350 |
| C | 1.425232690  | 3.909586430  | 9.378244320 |
| C | 2.673172750  | 3.189089820  | 9.378316350 |
| C | 4.098417510  | 0.720505500  | 9.378244320 |

|   |              |              |               |
|---|--------------|--------------|---------------|
| C | 4.098419170  | -0.720490600 | 9.378316350   |
| C | 0.714464210  | -4.085301050 | 10.635045970  |
| C | -0.714450560 | -4.085301680 | 10.635011220  |
| C | -3.180742390 | -2.661394680 | 10.635045970  |
| C | -3.895200320 | -1.423918500 | 10.635011220  |
| C | -3.895206600 | 1.423906370  | 10.635045970  |
| C | -3.180749750 | 2.661383170  | 10.635011220  |
| C | -0.714464210 | 4.085301050  | 10.635045970  |
| C | 0.714450560  | 4.085301680  | 10.635011220  |
| C | 3.180742390  | 2.661394680  | 10.635045970  |
| C | 3.895200320  | 1.423918500  | 10.635011220  |
| C | 3.895206600  | -1.423906370 | 10.635045970  |
| C | 3.180749750  | -2.661383170 | 10.635011220  |
| C | -1.419833310 | -3.912826280 | 11.893762520  |
| C | -2.678669720 | -3.186037950 | 11.893603890  |
| C | -4.098523620 | -0.726801430 | 11.893762520  |
| C | -4.098524660 | 0.726777050  | 11.893603890  |
| C | -2.678690310 | 3.186024860  | 11.893762520  |
| C | -1.419854940 | 3.912815000  | 11.893603890  |
| C | 1.419833310  | 3.912826280  | 11.893762520  |
| C | 2.678669720  | 3.186037950  | 11.893603890  |
| C | 4.098523620  | 0.726801430  | 11.893762520  |
| C | 4.098524660  | -0.726777050 | 11.893603890  |
| C | 2.678690310  | -3.186024860 | 11.893762520  |
| C | 1.419854940  | -3.912815000 | 11.893603890  |
| C | -3.222867360 | -2.705915840 | 13.134899760  |
| C | -3.954815020 | -1.438122130 | 13.134677280  |
| C | -3.954825530 | 1.438127090  | 13.134899760  |
| C | -3.222857810 | 2.705909210  | 13.134677280  |
| C | -0.731958170 | 4.144042920  | 13.134899760  |
| C | 0.731957210  | 4.144031340  | 13.134677280  |
| C | 3.222867360  | 2.705915840  | 13.134899760  |
| C | 3.954815020  | 1.438122130  | 13.134677280  |
| C | 3.954825530  | -1.438127090 | 13.134899760  |
| C | 3.222857810  | -2.705909210 | 13.134677280  |
| C | 0.731958170  | -4.144042920 | 13.134899760  |
| C | -0.731957210 | -4.144031340 | 13.134677280  |
| C | -4.215389400 | -0.690449800 | 14.353095860  |
| C | -4.215367840 | 0.690440600  | 14.352894950  |
| C | -2.705641770 | 3.305409410  | 14.353095860  |
| C | -1.509744820 | 3.995835940  | 14.352894950  |
| C | 1.509747630  | 3.995859210  | 14.353095860  |
| C | 2.705623020  | 3.305395340  | 14.352894950  |
| C | 4.215389400  | 0.690449800  | 14.353095860  |
| C | 4.215367840  | -0.690440600 | 14.352894950  |
| C | 2.705641770  | -3.305409410 | 14.353095860  |
| C | 1.509744820  | -3.995835940 | 14.352894950  |
| C | -1.509747630 | -3.995859210 | 14.353095860  |
| C | -2.705623020 | -3.305395340 | 14.352894950  |
| H | -4.330828370 | 1.082190910  | -15.306865750 |
| H | -3.102628920 | 3.209480340  | -15.306796310 |
| H | -1.228209360 | 4.291702850  | -15.306865750 |
| H | 1.228177050  | 4.291695630  | -15.306796310 |
| H | 3.102619010  | 3.209511930  | -15.306865750 |
| H | 4.330805970  | 1.082215290  | -15.306796310 |
| H | 4.330828370  | -1.082190910 | -15.306865750 |
| H | 3.102628920  | -3.209480340 | -15.306796310 |
| H | 1.228209360  | -4.291702850 | -15.306865750 |
| H | -1.228177050 | -4.291695630 | -15.306796310 |
| H | -3.102619010 | -3.209511930 | -15.306865750 |
| H | -4.330805970 | -1.082215290 | -15.306796310 |
| H | -4.291695630 | -1.228177050 | 15.306796310  |
| H | -4.291702850 | 1.228209360  | 15.306865750  |
| H | -3.209480340 | 3.102628920  | 15.306796310  |
| H | -1.082190910 | 4.330828370  | 15.306865750  |
| H | 1.082215290  | 4.330805970  | 15.306796310  |
| H | 3.209511930  | 3.102619010  | 15.306865750  |
| H | 4.291695630  | 1.228177050  | 15.306796310  |
| H | 4.291702850  | -1.228209360 | 15.306865750  |
| H | 3.209480340  | -3.102628920 | 15.306796310  |

|   |              |              |              |
|---|--------------|--------------|--------------|
| H | 1.082190910  | -4.330828370 | 15.306865750 |
| H | -1.082215290 | -4.330805970 | 15.306796310 |
| H | -3.209511930 | -3.102619010 | 15.306865750 |

Nanotube (6,6) ul2v6s  
B3LYP/STO-3G Energy: -11308.319976

|   |             |             |             |
|---|-------------|-------------|-------------|
| C | -3.89817903 | 1.76221817  | 14.95892278 |
| C | -4.25703116 | 0.42296381  | 14.95892278 |
| C | -3.47521522 | -2.49481298 | 14.95892278 |
| C | -2.49481298 | -3.47521522 | 14.95892278 |
| C | 0.42296381  | -4.25703116 | 14.95892278 |
| C | 1.76221817  | -3.89817903 | 14.95892278 |
| C | 3.89817903  | -1.76221817 | 14.95892278 |
| C | 4.25703116  | -0.42296381 | 14.95892278 |
| C | 3.47521522  | 2.49481298  | 14.95892278 |
| C | 2.49481298  | 3.47521522  | 14.95892278 |
| C | -0.42296381 | 4.25703116  | 14.95892278 |
| C | -1.76221817 | 3.89817903  | 14.95892278 |
| C | -4.20151360 | -0.36288705 | 13.74699580 |
| C | -3.82006104 | -1.78648740 | 13.74699580 |
| C | -1.78648740 | -3.82006104 | 13.74699580 |
| C | -0.36288705 | -4.20151360 | 13.74699580 |
| C | 2.41502620  | -3.45717399 | 13.74699580 |
| C | 3.45717399  | -2.41502620 | 13.74699580 |
| C | 4.20151360  | 0.36288705  | 13.74699580 |
| C | 3.82006104  | 1.78648740  | 13.74699580 |
| C | 1.78648740  | 3.82006104  | 13.74699580 |
| C | 0.36288705  | 4.20151360  | 13.74699580 |
| C | -2.41502620 | 3.45717399  | 13.74699580 |
| C | -3.45717399 | 2.41502620  | 13.74699580 |
| C | -3.41026945 | -2.38419280 | 12.50710914 |
| C | -2.38419280 | -3.41026945 | 12.50710914 |
| C | 0.35963680  | -4.14547638 | 12.50710914 |
| C | 1.76128358  | -3.76990626 | 12.50710914 |
| C | 3.76990626  | -1.76128358 | 12.50710914 |
| C | 4.14547638  | -0.35963680 | 12.50710914 |
| C | 3.41026945  | 2.38419280  | 12.50710914 |
| C | 2.38419280  | 3.41026945  | 12.50710914 |
| C | -0.35963680 | 4.14547638  | 12.50710914 |
| C | -1.76128358 | 3.76990626  | 12.50710914 |
| C | -3.76990626 | 1.76128358  | 12.50710914 |
| C | -4.14547638 | 0.35963680  | 12.50710914 |
| C | -1.74949110 | -3.76330840 | 11.24433822 |
| C | -0.36655047 | -4.13386622 | 11.24433822 |
| C | 2.38437513  | -3.39675793 | 11.24433822 |
| C | 3.39675793  | -2.38437513 | 11.24433822 |
| C | 4.13386622  | 0.36655047  | 11.24433822 |
| C | 3.76330840  | 1.74949110  | 11.24433822 |
| C | 1.74949110  | 3.76330840  | 11.24433822 |
| C | 0.36655047  | 4.13386622  | 11.24433822 |
| C | -2.38437513 | 3.39675793  | 11.24433822 |
| C | -3.39675793 | 2.38437513  | 11.24433822 |
| C | -4.13386622 | -0.36655047 | 11.24433822 |
| C | -3.76330840 | -1.74949110 | 11.24433822 |
| C | 0.36169258  | -4.15391404 | 9.99319474  |
| C | 1.76372206  | -3.77824138 | 9.99319474  |
| C | 3.77824138  | -1.76372206 | 9.99319474  |
| C | 4.15391404  | -0.36169258 | 9.99319474  |
| C | 3.41654879  | 2.39019199  | 9.99319474  |
| C | 2.39019199  | 3.41654879  | 9.99319474  |
| C | -0.36169258 | 4.15391404  | 9.99319474  |
| C | -1.76372206 | 3.77824138  | 9.99319474  |
| C | -3.77824138 | 1.76372206  | 9.99319474  |
| C | -4.15391404 | 0.36169258  | 9.99319474  |
| C | -3.41654879 | -2.39019199 | 9.99319474  |
| C | -2.39019199 | -3.41654879 | 9.99319474  |
| C | 2.39310523  | -3.41758015 | 8.75048769  |



|   |             |             |            |
|---|-------------|-------------|------------|
| C | 3.41758015  | -2.39310523 | 8.75048769 |
| C | 4.15626384  | 0.36369985  | 8.75048769 |
| C | 3.78128000  | 1.76315861  | 8.75048769 |
| C | 1.76315861  | 3.78128000  | 8.75048769 |
| C | 0.36369985  | 4.15626384  | 8.75048769 |
| C | -2.39310523 | 3.41758015  | 8.75048769 |
| C | -3.41758015 | 2.39310523  | 8.75048769 |
| C | -4.15626384 | -0.36369985 | 8.75048769 |
| C | -3.78128000 | -1.76315861 | 8.75048769 |
| C | -1.76315861 | -3.78128000 | 8.75048769 |
| C | -0.36369985 | -4.15626384 | 8.75048769 |
| C | 3.77859255  | -1.75754809 | 7.49609724 |
| C | 4.15113119  | -0.36721499 | 7.49609724 |
| C | 3.41137757  | 2.39358310  | 7.49609724 |
| C | 2.39358310  | 3.41137757  | 7.49609724 |
| C | -0.36721499 | 4.15113119  | 7.49609724 |
| C | -1.75754809 | 3.77859255  | 7.49609724 |
| C | -3.77859255 | 1.75754809  | 7.49609724 |
| C | -4.15113119 | 0.36721499  | 7.49609724 |
| C | -3.41137757 | -2.39358310 | 7.49609724 |
| C | -2.39358310 | -3.41137757 | 7.49609724 |
| C | 0.36721499  | -4.15113119 | 7.49609724 |
| C | 1.75754809  | -3.77859255 | 7.49609724 |
| C | 4.15845479  | 0.36326052  | 6.24488659 |
| C | 3.78295775  | 1.76463455  | 6.24488659 |
| C | 1.76463455  | 3.78295775  | 6.24488659 |
| C | 0.36326052  | 4.15845479  | 6.24488659 |
| C | -2.39382023 | 3.41969723  | 6.24488659 |
| C | -3.41969723 | 2.39382023  | 6.24488659 |
| C | -4.15845479 | -0.36326052 | 6.24488659 |
| C | -3.78295775 | -1.76463455 | 6.24488659 |
| C | -1.76463455 | -3.78295775 | 6.24488659 |
| C | -0.36326052 | -4.15845479 | 6.24488659 |
| C | 2.39382023  | -3.41969723 | 6.24488659 |
| C | 3.41969723  | -2.39382023 | 6.24488659 |
| C | 3.41792099  | 2.39331553  | 5.00109222 |
| C | 2.39331553  | 3.41792099  | 5.00109222 |
| C | -0.36371156 | 4.15666417  | 5.00109222 |
| C | -1.76334864 | 3.78163254  | 5.00109222 |
| C | -3.78163254 | 1.76334864  | 5.00109222 |
| C | -4.15666417 | 0.36371156  | 5.00109222 |
| C | -3.41792099 | -2.39331553 | 5.00109222 |
| C | -2.39331553 | -3.41792099 | 5.00109222 |
| C | 0.36371156  | -4.15666417 | 5.00109222 |
| C | 1.76334864  | -3.78163254 | 5.00109222 |
| C | 3.78163254  | -1.76334864 | 5.00109222 |
| C | 4.15666417  | -0.36371156 | 5.00109222 |
| C | 1.75787711  | 3.77781496  | 3.74826483 |
| C | 0.36654124  | 4.15062228  | 3.74826483 |
| C | -2.39274517 | 3.41127372  | 3.74826483 |
| C | -3.41127372 | 2.39274517  | 3.74826483 |
| C | -4.15062228 | -0.36654124 | 3.74826483 |
| C | -3.77781496 | -1.75787711 | 3.74826483 |
| C | -1.75787711 | -3.77781496 | 3.74826483 |
| C | -0.36654124 | -4.15062228 | 3.74826483 |
| C | 2.39274517  | -3.41127372 | 3.74826483 |
| C | 3.41127372  | -2.39274517 | 3.74826483 |
| C | 4.15062228  | 0.36654124  | 3.74826483 |
| C | 3.77781496  | 1.75787711  | 3.74826483 |
| C | -0.36354998 | 4.15734899  | 2.49655654 |
| C | -1.76383098 | 3.78214483  | 2.49655654 |
| C | -3.78214483 | 1.76383098  | 2.49655654 |
| C | -4.15734899 | 0.36354998  | 2.49655654 |
| C | -3.41859485 | -2.39351801 | 2.49655654 |
| C | -2.39351801 | -3.41859485 | 2.49655654 |
| C | 0.36354998  | -4.15734899 | 2.49655654 |
| C | 1.76383098  | -3.78214483 | 2.49655654 |
| C | 3.78214483  | -1.76383098 | 2.49655654 |
| C | 4.15734899  | -0.36354998 | 2.49655654 |
| C | 3.41859485  | 2.39351801  | 2.49655654 |

|   |             |             |             |
|---|-------------|-------------|-------------|
| C | 2.39351801  | 3.41859485  | 2.49655654  |
| C | -2.39341300 | 3.41814820  | 1.25226472  |
| C | -3.41814820 | 2.39341300  | 1.25226472  |
| C | -4.15690967 | -0.36368236 | 1.25226472  |
| C | -3.78183056 | -1.76349667 | 1.25226472  |
| C | -1.76349667 | -3.78183056 | 1.25226472  |
| C | -0.36368236 | -4.15690967 | 1.25226472  |
| C | 2.39341300  | -3.41814820 | 1.25226472  |
| C | 3.41814820  | -2.39341300 | 1.25226472  |
| C | 4.15690967  | 0.36368236  | 1.25226472  |
| C | 3.78183056  | 1.76349667  | 1.25226472  |
| C | 1.76349667  | 3.78183056  | 1.25226472  |
| C | 0.36368236  | 4.15690967  | 1.25226472  |
| C | -3.77782952 | 1.75803254  | 0.00000000  |
| C | -4.15071260 | 0.36641392  | 0.00000000  |
| C | -3.41141560 | -2.39268007 | 0.00000000  |
| C | -2.39268007 | -3.41141560 | 0.00000000  |
| C | 0.36641392  | -4.15071260 | 0.00000000  |
| C | 1.75803254  | -3.77782952 | 0.00000000  |
| C | 3.77782952  | -1.75803254 | 0.00000000  |
| C | 4.15071260  | -0.36641392 | 0.00000000  |
| C | 3.41141560  | 2.39268007  | 0.00000000  |
| C | 2.39268007  | 3.41141560  | 0.00000000  |
| C | -0.36641392 | 4.15071260  | 0.00000000  |
| C | -1.75803254 | 3.77782952  | 0.00000000  |
| C | -4.15690967 | -0.36368236 | -1.25226472 |
| C | -3.78183056 | -1.76349667 | -1.25226472 |
| C | -1.76349667 | -3.78183056 | -1.25226472 |
| C | -0.36368236 | -4.15690967 | -1.25226472 |
| C | 2.39341300  | -3.41814820 | -1.25226472 |
| C | 3.41814820  | -2.39341300 | -1.25226472 |
| C | 4.15690967  | 0.36368236  | -1.25226472 |
| C | 3.78183056  | 1.76349667  | -1.25226472 |
| C | 1.76349667  | 3.78183056  | -1.25226472 |
| C | 0.36368236  | 4.15690967  | -1.25226472 |
| C | -2.39341300 | 3.41814820  | -1.25226472 |
| C | -3.41814820 | 2.39341300  | -1.25226472 |
| C | -3.41859485 | -2.39351801 | -2.49655654 |
| C | -2.39351801 | -3.41859485 | -2.49655654 |
| C | 0.36354998  | -4.15734899 | -2.49655654 |
| C | 1.76383098  | -3.78214483 | -2.49655654 |
| C | 3.78214483  | -1.76383098 | -2.49655654 |
| C | 4.15734899  | -0.36354998 | -2.49655654 |
| C | 3.41859485  | 2.39351801  | -2.49655654 |
| C | 2.39351801  | 3.41859485  | -2.49655654 |
| C | -0.36354998 | 4.15734899  | -2.49655654 |
| C | -1.76383098 | 3.78214483  | -2.49655654 |
| C | -3.78214483 | 1.76383098  | -2.49655654 |
| C | -4.15734899 | 0.36354998  | -2.49655654 |
| C | -1.75787711 | -3.77781496 | -3.74826483 |
| C | -0.36654124 | -4.15062228 | -3.74826483 |
| C | 2.39274517  | -3.41127372 | -3.74826483 |
| C | 3.41127372  | -2.39274517 | -3.74826483 |
| C | 4.15062228  | 0.36654124  | -3.74826483 |
| C | 3.77781496  | 1.75787711  | -3.74826483 |
| C | 1.75787711  | 3.77781496  | -3.74826483 |
| C | 0.36654124  | 4.15062228  | -3.74826483 |
| C | -2.39274517 | 3.41127372  | -3.74826483 |
| C | -3.41127372 | 2.39274517  | -3.74826483 |
| C | -4.15062228 | -0.36654124 | -3.74826483 |
| C | -3.77781496 | -1.75787711 | -3.74826483 |
| C | 0.36371156  | -4.15666417 | -5.00109222 |
| C | 1.76334864  | -3.78163254 | -5.00109222 |
| C | 3.78163254  | -1.76334864 | -5.00109222 |
| C | 4.15666417  | -0.36371156 | -5.00109222 |
| C | 3.41792099  | 2.39331553  | -5.00109222 |
| C | 2.39331553  | 3.41792099  | -5.00109222 |
| C | -0.36371156 | 4.15666417  | -5.00109222 |
| C | -1.76334864 | 3.78163254  | -5.00109222 |
| C | -3.78163254 | 1.76334864  | -5.00109222 |

|   |             |             |              |
|---|-------------|-------------|--------------|
| C | -4.15666417 | 0.36371156  | -5.00109222  |
| C | -3.41792099 | -2.39331553 | -5.00109222  |
| C | -2.39331553 | -3.41792099 | -5.00109222  |
| C | 2.39382023  | -3.41969723 | -6.24488659  |
| C | 3.41969723  | -2.39382023 | -6.24488659  |
| C | 4.15845479  | 0.36326052  | -6.24488659  |
| C | 3.78295775  | 1.76463455  | -6.24488659  |
| C | 1.76463455  | 3.78295775  | -6.24488659  |
| C | 0.36326052  | 4.15845479  | -6.24488659  |
| C | -2.39382023 | 3.41969723  | -6.24488659  |
| C | -3.41969723 | 2.39382023  | -6.24488659  |
| C | -4.15845479 | -0.36326052 | -6.24488659  |
| C | -3.78295775 | -1.76463455 | -6.24488659  |
| C | -1.76463455 | -3.78295775 | -6.24488659  |
| C | -0.36326052 | -4.15845479 | -6.24488659  |
| C | 3.77859255  | -1.75754809 | -7.49609724  |
| C | 4.15113119  | -0.36721499 | -7.49609724  |
| C | 3.41137757  | 2.39358310  | -7.49609724  |
| C | 2.39358310  | 3.41137757  | -7.49609724  |
| C | -0.36721499 | 4.15113119  | -7.49609724  |
| C | -1.75754809 | 3.77859255  | -7.49609724  |
| C | -3.77859255 | 1.75754809  | -7.49609724  |
| C | -4.15113119 | 0.36721499  | -7.49609724  |
| C | -3.41137757 | -2.39358310 | -7.49609724  |
| C | -2.39358310 | -3.41137757 | -7.49609724  |
| C | 0.36721499  | -4.15113119 | -7.49609724  |
| C | 1.75754809  | -3.77859255 | -7.49609724  |
| C | 4.15626384  | 0.36369985  | -8.75048769  |
| C | 3.78128000  | 1.76315861  | -8.75048769  |
| C | 1.76315861  | 3.78128000  | -8.75048769  |
| C | 0.36369985  | 4.15626384  | -8.75048769  |
| C | -2.39310523 | 3.41758015  | -8.75048769  |
| C | -3.41758015 | 2.39310523  | -8.75048769  |
| C | -4.15626384 | -0.36369985 | -8.75048769  |
| C | -3.78128000 | -1.76315861 | -8.75048769  |
| C | -1.76315861 | -3.78128000 | -8.75048769  |
| C | -0.36369985 | -4.15626384 | -8.75048769  |
| C | 2.39310523  | -3.41758015 | -8.75048769  |
| C | 3.41758015  | -2.39310523 | -8.75048769  |
| C | 3.41654879  | 2.39019199  | -9.99319474  |
| C | 2.39019199  | 3.41654879  | -9.99319474  |
| C | -0.36169258 | 4.15391404  | -9.99319474  |
| C | -1.76372206 | 3.77824138  | -9.99319474  |
| C | -3.77824138 | 1.76372206  | -9.99319474  |
| C | -4.15391404 | 0.36169258  | -9.99319474  |
| C | -3.41654879 | -2.39019199 | -9.99319474  |
| C | -2.39019199 | -3.41654879 | -9.99319474  |
| C | 0.36169258  | -4.15391404 | -9.99319474  |
| C | 1.76372206  | -3.77824138 | -9.99319474  |
| C | 3.77824138  | -1.76372206 | -9.99319474  |
| C | 4.15391404  | -0.36169258 | -9.99319474  |
| C | 1.74949110  | 3.76330840  | -11.24433822 |
| C | 0.36655047  | 4.13386622  | -11.24433822 |
| C | -2.38437513 | 3.39675793  | -11.24433822 |
| C | -3.39675793 | 2.38437513  | -11.24433822 |
| C | -4.13386622 | -0.36655047 | -11.24433822 |
| C | -3.76330840 | -1.74949110 | -11.24433822 |
| C | -1.74949110 | -3.76330840 | -11.24433822 |
| C | -0.36655047 | -4.13386622 | -11.24433822 |
| C | 2.38437513  | -3.39675793 | -11.24433822 |
| C | 3.39675793  | -2.38437513 | -11.24433822 |
| C | 4.13386622  | 0.36655047  | -11.24433822 |
| C | 3.76330840  | 1.74949110  | -11.24433822 |
| C | -0.35963680 | 4.14547638  | -12.50710914 |
| C | -1.76128358 | 3.76990626  | -12.50710914 |
| C | -3.76990626 | 1.76128358  | -12.50710914 |
| C | -4.14547638 | 0.35963680  | -12.50710914 |
| C | -3.41026945 | -2.38419280 | -12.50710914 |
| C | -2.38419280 | -3.41026945 | -12.50710914 |
| C | 0.35963680  | -4.14547638 | -12.50710914 |

|   |             |             |              |
|---|-------------|-------------|--------------|
| C | 1.76128358  | -3.76990626 | -12.50710914 |
| C | 3.76990626  | -1.76128358 | -12.50710914 |
| C | 4.14547638  | -0.35963680 | -12.50710914 |
| C | 3.41026945  | 2.38419280  | -12.50710914 |
| C | 2.38419280  | 3.41026945  | -12.50710914 |
| C | -2.41502620 | 3.45717399  | -13.74699580 |
| C | -3.45717399 | 2.41502620  | -13.74699580 |
| C | -4.20151360 | -0.36288705 | -13.74699580 |
| C | -3.82006104 | -1.78648740 | -13.74699580 |
| C | -1.78648740 | -3.82006104 | -13.74699580 |
| C | -0.36288705 | -4.20151360 | -13.74699580 |
| C | 2.41502620  | -3.45717399 | -13.74699580 |
| C | 3.45717399  | -2.41502620 | -13.74699580 |
| C | 4.20151360  | 0.36288705  | -13.74699580 |
| C | 3.82006104  | 1.78648740  | -13.74699580 |
| C | 1.78648740  | 3.82006104  | -13.74699580 |
| C | 0.36288705  | 4.20151360  | -13.74699580 |
| C | -3.89817903 | 1.76221817  | -14.95892278 |
| C | -4.25703116 | 0.42296381  | -14.95892278 |
| C | -3.47521522 | -2.49481298 | -14.95892278 |
| C | -2.49481298 | -3.47521522 | -14.95892278 |
| C | 0.42296381  | -4.25703116 | -14.95892278 |
| C | 1.76221817  | -3.89817903 | -14.95892278 |
| C | 3.89817903  | -1.76221817 | -14.95892278 |
| C | 4.25703116  | -0.42296381 | -14.95892278 |
| C | 3.47521522  | 2.49481298  | -14.95892278 |
| C | 2.49481298  | 3.47521522  | -14.95892278 |
| C | -0.42296381 | 4.25703116  | -14.95892278 |
| C | -1.76221817 | 3.89817903  | -14.95892278 |
| H | -3.82369483 | 2.29448203  | 15.91592767  |
| H | -4.45865788 | -0.07523232 | 15.91592767  |
| H | -3.89892715 | -2.16417584 | 15.91592767  |
| H | -2.16417584 | -3.89892715 | 15.91592767  |
| H | -0.07523232 | -4.45865788 | 15.91592767  |
| H | 2.29448203  | -3.82369483 | 15.91592767  |
| H | 3.82369483  | -2.29448203 | 15.91592767  |
| H | 4.45865788  | 0.07523232  | 15.91592767  |
| H | 3.89892715  | 2.16417584  | 15.91592767  |
| H | 2.16417584  | 3.89892715  | 15.91592767  |
| H | 0.07523232  | 4.45865788  | 15.91592767  |
| H | -2.29448203 | 3.82369483  | 15.91592767  |
| H | -3.82369483 | 2.29448203  | -15.91592767 |
| H | -4.45865788 | -0.07523232 | -15.91592767 |
| H | -3.89892715 | -2.16417584 | -15.91592767 |
| H | -2.16417584 | -3.89892715 | -15.91592767 |
| H | -0.07523232 | -4.45865788 | -15.91592767 |
| H | 2.29448203  | -3.82369483 | -15.91592767 |
| H | 3.82369483  | -2.29448203 | -15.91592767 |
| H | 4.45865788  | 0.07523232  | -15.91592767 |
| H | 3.89892715  | 2.16417584  | -15.91592767 |
| H | 2.16417584  | 3.89892715  | -15.91592767 |
| H | 0.07523232  | 4.45865788  | -15.91592767 |
| H | -2.29448203 | 3.82369483  | -15.91592767 |

Nanotube (6,6) ul3v0s  
B3LYP/STO-3G Energy: -11760.097655

|   |             |             |              |
|---|-------------|-------------|--------------|
| C | -3.99357590 | 1.50692263  | -15.59637561 |
| C | -3.30182057 | 2.70507614  | -15.59636437 |
| C | -0.69175467 | 4.21199950  | -15.59637561 |
| C | 0.69175437  | 4.21199857  | -15.59636437 |
| C | 3.30182123  | 2.70507687  | -15.59637561 |
| C | 3.99357494  | 1.50692243  | -15.59636437 |
| C | 3.99357590  | -1.50692263 | -15.59637561 |
| C | 3.30182057  | -2.70507614 | -15.59636437 |
| C | 0.69175467  | -4.21199950 | -15.59637561 |
| C | -0.69175437 | -4.21199857 | -15.59636437 |
| C | -3.30182123 | -2.70507687 | -15.59637561 |

|   |             |             |              |
|---|-------------|-------------|--------------|
| C | -3.99357494 | -1.50692243 | -15.59636437 |
| C | -2.70936626 | 3.22375284  | -14.38050329 |
| C | -1.43716952 | 3.95825528  | -14.38049300 |
| C | 1.43716872  | 3.95825643  | -14.38050329 |
| C | 2.70936487  | 3.22375295  | -14.38049300 |
| C | 4.14653499  | 0.73450359  | -14.38050329 |
| C | 4.14653439  | -0.73450233 | -14.38049300 |
| C | 2.70936626  | -3.22375284 | -14.38050329 |
| C | 1.43716952  | -3.95825528 | -14.38049300 |
| C | -1.43716872 | -3.95825643 | -14.38050329 |
| C | -2.70936487 | -3.22375295 | -14.38049300 |
| C | -4.14653499 | -0.73450359 | -14.38050329 |
| C | -4.14653439 | 0.73450233  | -14.38049300 |
| C | -0.72605271 | 4.09747505  | -13.14025852 |
| C | 0.72605004  | 4.09747566  | -13.14025739 |
| C | 3.18549112  | 2.67751762  | -13.14025852 |
| C | 3.91154303  | 1.41996005  | -13.14025739 |
| C | 3.91154384  | -1.41995743 | -13.14025852 |
| C | 3.18549299  | -2.67751561 | -13.14025739 |
| C | 0.72605271  | -4.09747505 | -13.14025852 |
| C | -0.72605004 | -4.09747566 | -13.14025739 |
| C | -3.18549112 | -2.67751762 | -13.14025852 |
| C | -3.91154303 | -1.41996005 | -13.14025739 |
| C | -3.91154384 | 1.41995743  | -13.14025852 |
| C | -3.18549299 | 2.67751561  | -13.14025739 |
| C | 1.42403383  | 3.89638766  | -11.87911455 |
| C | 2.66235240  | 3.18144422  | -11.87912627 |
| C | 4.08638761  | 0.71494436  | -11.87911455 |
| C | 4.08638771  | -0.71494270 | -11.87912627 |
| C | 2.66235378  | -3.18144330 | -11.87911455 |
| C | 1.42403532  | -3.89638692 | -11.87912627 |
| C | -1.42403383 | -3.89638766 | -11.87911455 |
| C | -2.66235240 | -3.18144422 | -11.87912627 |
| C | -4.08638761 | -0.71494436 | -11.87911455 |
| C | -4.08638771 | 0.71494270  | -11.87912627 |
| C | -2.66235378 | 3.18144330  | -11.87911455 |
| C | -1.42403532 | 3.89638692  | -11.87912627 |
| C | 3.19075045  | 2.67755722  | -10.62481760 |
| C | 3.91420733  | 1.42449190  | -10.62483472 |
| C | 3.91420779  | -1.42449234 | -10.62481760 |
| C | 3.19074984  | -2.67755703 | -10.62483472 |
| C | 0.72345735  | -4.10204955 | -10.62481760 |
| C | -0.72345749 | -4.10204893 | -10.62483472 |
| C | -3.19075045 | -2.67755722 | -10.62481760 |
| C | -3.91420733 | -1.42449190 | -10.62483472 |
| C | -3.91420779 | 1.42449234  | -10.62481760 |
| C | -3.19074984 | 2.67755703  | -10.62483472 |
| C | -0.72345735 | 4.10204955  | -10.62481760 |
| C | 0.72345749  | 4.10204893  | -10.62483472 |
| C | 4.10820962  | 0.72506124  | -9.38122210  |
| C | 4.10820974  | -0.72506265 | -9.38123216  |
| C | 2.68202626  | -3.19528327 | -9.38122210  |
| C | 1.42618219  | -3.92034533 | -9.38123216  |
| C | -1.42618335 | -3.92034451 | -9.38122210  |
| C | -2.68202755 | -3.19528267 | -9.38123216  |
| C | -4.10820962 | -0.72506124 | -9.38122210  |
| C | -4.10820974 | 0.72506265  | -9.38123216  |
| C | -2.68202626 | 3.19528327  | -9.38122210  |
| C | -1.42618219 | 3.92034533  | -9.38123216  |
| C | 1.42618335  | 3.92034451  | -9.38122210  |
| C | 2.68202755  | 3.19528267  | -9.38123216  |
| C | 3.91248098  | -1.42866036 | -8.12881310  |
| C | 3.19349581  | -2.67397870 | -8.12880926  |
| C | 0.71898433  | -4.10263810 | -8.12881310  |
| C | -0.71898558 | -4.10263785 | -8.12880926  |
| C | -3.19349665 | -2.67397774 | -8.12881310  |
| C | -3.91248139 | -1.42865915 | -8.12880926  |
| C | -3.91248098 | 1.42866036  | -8.12881310  |
| C | -3.19349581 | 2.67397870  | -8.12880926  |
| C | -0.71898433 | 4.10263810  | -8.12881310  |

|   |             |             |             |
|---|-------------|-------------|-------------|
| C | 0.71898558  | 4.10263785  | -8.12880926 |
| C | 3.19349665  | 2.67397774  | -8.12881310 |
| C | 3.91248139  | 1.42865915  | -8.12880926 |
| C | 2.67933821  | -3.19526956 | -6.87398353 |
| C | 1.42751329  | -3.91800974 | -6.87396736 |
| C | -1.42751550 | -3.91800973 | -6.87398353 |
| C | -2.67933932 | -3.19526764 | -6.87396736 |
| C | -4.10685371 | -0.72274018 | -6.87398353 |
| C | -4.10685261 | 0.72274210  | -6.87396736 |
| C | -2.67933821 | 3.19526956  | -6.87398353 |
| C | -1.42751329 | 3.91800974  | -6.87396736 |
| C | 1.42751550  | 3.91800973  | -6.87398353 |
| C | 2.67933932  | 3.19526764  | -6.87396736 |
| C | 4.10685371  | 0.72274018  | -6.87398353 |
| C | 4.10685261  | -0.72274210 | -6.87396736 |
| C | 0.72542633  | -4.11037181 | -5.62838032 |
| C | -0.72542485 | -4.11037278 | -5.62836060 |
| C | -3.19697324 | -2.68342354 | -5.62838032 |
| C | -3.92239967 | -1.42695004 | -5.62836060 |
| C | -3.92239957 | 1.42694828  | -5.62838032 |
| C | -3.19697482 | 2.68342274  | -5.62836060 |
| C | -0.72542633 | 4.11037181  | -5.62838032 |
| C | 0.72542485  | 4.11037278  | -5.62836060 |
| C | 3.19697324  | 2.68342354  | -5.62838032 |
| C | 3.92239967  | 1.42695004  | -5.62836060 |
| C | 3.92239957  | -1.42694828 | -5.62838032 |
| C | 3.19697482  | -2.68342274 | -5.62836060 |
| C | -1.42824854 | -3.91403353 | -4.37844946 |
| C | -2.67552779 | -3.19391677 | -4.37843175 |
| C | -4.10377674 | -0.72011724 | -4.37844946 |
| C | -4.10377695 | 0.72011664  | -4.37843175 |
| C | -2.67552819 | 3.19391628  | -4.37844946 |
| C | -1.42824917 | 3.91403342  | -4.37843175 |
| C | 1.42824854  | 3.91403353  | -4.37844946 |
| C | 2.67552779  | 3.19391677  | -4.37843175 |
| C | 4.10377674  | 0.72011724  | -4.37844946 |
| C | 4.10377695  | -0.72011664 | -4.37843175 |
| C | 2.67552819  | -3.19391628 | -4.37844946 |
| C | 1.42824917  | -3.91403342 | -4.37843175 |
| C | -3.19420517 | -2.67749757 | -3.12334301 |
| C | -3.91588341 | -1.42751273 | -3.12332424 |
| C | -3.91588349 | 1.42751404  | -3.12334301 |
| C | -3.19420399 | 2.67749815  | -3.12332424 |
| C | -0.72167833 | 4.10501160  | -3.12334301 |
| C | 0.72167942  | 4.10501088  | -3.12332424 |
| C | 3.19420517  | 2.67749757  | -3.12334301 |
| C | 3.91588341  | 1.42751273  | -3.12332424 |
| C | 3.91588349  | -1.42751404 | -3.12334301 |
| C | 3.19420399  | -2.67749815 | -3.12332424 |
| C | 0.72167833  | -4.10501160 | -3.12334301 |
| C | -0.72167942 | -4.10501088 | -3.12332424 |
| C | -4.10967235 | -0.72535824 | -1.87617277 |
| C | -4.10967343 | 0.72535724  | -1.87615242 |
| C | -2.68301484 | 3.19640154  | -1.87617277 |
| C | -1.42665892 | 3.92176022  | -1.87615242 |
| C | 1.42665751  | 3.92175978  | -1.87617277 |
| C | 2.68301452  | 3.19640297  | -1.87615242 |
| C | 4.10967235  | 0.72535824  | -1.87617277 |
| C | 4.10967343  | -0.72535724 | -1.87615242 |
| C | 2.68301484  | -3.19640154 | -1.87617277 |
| C | 1.42665892  | -3.92176022 | -1.87615242 |
| C | -1.42665751 | -3.92175978 | -1.87617277 |
| C | -2.68301452 | -3.19640297 | -1.87615242 |
| C | -3.91525370 | 1.42799374  | -0.62766643 |
| C | -3.19430563 | 2.67671114  | -0.62764799 |
| C | -0.72094799 | 4.10470604  | -0.62766643 |
| C | 0.72094703  | 4.10470540  | -0.62764799 |
| C | 3.19430571  | 2.67671230  | -0.62766643 |
| C | 3.91525266  | 1.42799425  | -0.62764799 |
| C | 3.91525370  | -1.42799374 | -0.62766643 |

|   |             |             |             |
|---|-------------|-------------|-------------|
| C | 3.19430563  | -2.67671114 | -0.62764799 |
| C | 0.72094799  | -4.10470604 | -0.62766643 |
| C | -0.72094703 | -4.10470540 | -0.62764799 |
| C | -3.19430571 | -2.67671230 | -0.62766643 |
| C | -3.91525266 | -1.42799425 | -0.62764799 |
| C | -2.67671114 | 3.19430563  | 0.62764799  |
| C | -1.42799374 | 3.91525370  | 0.62766643  |
| C | 1.42799425  | 3.91525266  | 0.62764799  |
| C | 2.67671230  | 3.19430571  | 0.62766643  |
| C | 4.10470540  | 0.72094703  | 0.62764799  |
| C | 4.10470604  | -0.72094799 | 0.62766643  |
| C | 2.67671114  | -3.19430563 | 0.62764799  |
| C | 1.42799374  | -3.91525370 | 0.62766643  |
| C | -1.42799425 | -3.91525266 | 0.62764799  |
| C | -2.67671230 | -3.19430571 | 0.62766643  |
| C | -4.10470540 | -0.72094703 | 0.62764799  |
| C | -4.10470604 | 0.72094799  | 0.62766643  |
| C | -0.72535724 | 4.10967343  | 1.87615242  |
| C | 0.72535824  | 4.10967235  | 1.87617277  |
| C | 3.19640297  | 2.68301452  | 1.87615242  |
| C | 3.92175978  | 1.42665751  | 1.87617277  |
| C | 3.92176022  | -1.42665892 | 1.87615242  |
| C | 3.19640154  | -2.68301484 | 1.87617277  |
| C | 0.72535724  | -4.10967343 | 1.87615242  |
| C | -0.72535824 | -4.10967235 | 1.87617277  |
| C | -3.19640297 | -2.68301452 | 1.87615242  |
| C | -3.92175978 | -1.42665751 | 1.87617277  |
| C | -3.92176022 | 1.42665892  | 1.87615242  |
| C | -3.19640154 | 2.68301484  | 1.87617277  |
| C | 1.42751273  | 3.91588341  | 3.12332424  |
| C | 2.67749757  | 3.19420517  | 3.12334301  |
| C | 4.10501088  | 0.72167942  | 3.12332424  |
| C | 4.10501160  | -0.72167833 | 3.12334301  |
| C | 2.67749815  | -3.19420399 | 3.12332424  |
| C | 1.42751404  | -3.91588349 | 3.12334301  |
| C | -1.42751273 | -3.91588341 | 3.12332424  |
| C | -2.67749757 | -3.19420517 | 3.12334301  |
| C | -4.10501088 | -0.72167942 | 3.12332424  |
| C | -4.10501160 | 0.72167833  | 3.12334301  |
| C | -2.67749815 | 3.19420399  | 3.12332424  |
| C | -1.42751404 | 3.91588349  | 3.12334301  |
| C | 3.19391677  | 2.67552779  | 4.37843175  |
| C | 3.91403353  | 1.42824854  | 4.37844946  |
| C | 3.91403342  | -1.42824917 | 4.37843175  |
| C | 3.19391628  | -2.67552819 | 4.37844946  |
| C | 0.72011664  | -4.10377695 | 4.37843175  |
| C | -0.72011724 | -4.10377674 | 4.37844946  |
| C | -3.19391677 | -2.67552779 | 4.37843175  |
| C | -3.91403353 | -1.42824854 | 4.37844946  |
| C | -3.91403342 | 1.42824917  | 4.37843175  |
| C | -3.19391628 | 2.67552819  | 4.37844946  |
| C | -0.72011664 | 4.10377695  | 4.37843175  |
| C | 0.72011724  | 4.10377674  | 4.37844946  |
| C | 4.11037278  | 0.72542485  | 5.62836060  |
| C | 4.11037181  | -0.72542633 | 5.62838032  |
| C | 2.68342274  | -3.19697482 | 5.62836060  |
| C | 1.42694828  | -3.92239957 | 5.62838032  |
| C | -1.42695004 | -3.92239967 | 5.62836060  |
| C | -2.68342354 | -3.19697324 | 5.62838032  |
| C | -4.11037278 | -0.72542485 | 5.62836060  |
| C | -4.11037181 | 0.72542633  | 5.62838032  |
| C | -2.68342274 | 3.19697482  | 5.62836060  |
| C | -1.42694828 | 3.92239957  | 5.62838032  |
| C | 1.42695004  | 3.92239967  | 5.62836060  |
| C | 2.68342354  | 3.19697324  | 5.62838032  |
| C | 3.91800974  | -1.42751329 | 6.87396736  |
| C | 3.19526956  | -2.67933821 | 6.87398353  |
| C | 0.72274210  | -4.10685261 | 6.87396736  |
| C | -0.72274018 | -4.10685371 | 6.87398353  |
| C | -3.19526764 | -2.67933932 | 6.87396736  |

|   |             |             |             |
|---|-------------|-------------|-------------|
| C | -3.91800973 | -1.42751550 | 6.87398353  |
| C | -3.91800974 | 1.42751329  | 6.87396736  |
| C | -3.19526956 | 2.67933821  | 6.87398353  |
| C | -0.72274210 | 4.10685261  | 6.87396736  |
| C | 0.72274018  | 4.10685371  | 6.87398353  |
| C | 3.19526764  | 2.67933932  | 6.87396736  |
| C | 3.91800973  | 1.42751550  | 6.87398353  |
| C | 2.67397870  | -3.19349581 | 8.12880926  |
| C | 1.42866036  | -3.91248098 | 8.12881310  |
| C | -1.42865915 | -3.91248139 | 8.12880926  |
| C | -2.67397774 | -3.19349665 | 8.12881310  |
| C | -4.10263785 | -0.71898558 | 8.12880926  |
| C | -4.10263810 | 0.71898433  | 8.12881310  |
| C | -2.67397870 | 3.19349581  | 8.12880926  |
| C | -1.42866036 | 3.91248098  | 8.12881310  |
| C | 1.42865915  | 3.91248139  | 8.12880926  |
| C | 2.67397774  | 3.19349665  | 8.12881310  |
| C | 4.10263785  | 0.71898558  | 8.12880926  |
| C | 4.10263810  | -0.71898433 | 8.12881310  |
| C | 0.72506265  | -4.10820974 | 9.38123216  |
| C | -0.72506124 | -4.10820962 | 9.38122210  |
| C | -3.19528267 | -2.68202755 | 9.38123216  |
| C | -3.92034451 | -1.42618335 | 9.38122210  |
| C | -3.92034533 | 1.42618219  | 9.38123216  |
| C | -3.19528327 | 2.68202626  | 9.38122210  |
| C | -0.72506265 | 4.10820974  | 9.38123216  |
| C | 0.72506124  | 4.10820962  | 9.38122210  |
| C | 3.19528267  | 2.68202755  | 9.38123216  |
| C | 3.92034451  | 1.42618335  | 9.38122210  |
| C | 3.92034533  | -1.42618219 | 9.38123216  |
| C | 3.19528327  | -2.68202626 | 9.38122210  |
| C | -1.42449190 | -3.91420733 | 10.62483472 |
| C | -2.67755722 | -3.19075045 | 10.62481760 |
| C | -4.10204893 | -0.72345749 | 10.62483472 |
| C | -4.10204955 | 0.72345735  | 10.62481760 |
| C | -2.67755703 | 3.19074984  | 10.62483472 |
| C | -1.42449234 | 3.91420779  | 10.62481760 |
| C | 1.42449190  | 3.91420733  | 10.62483472 |
| C | 2.67755722  | 3.19075045  | 10.62481760 |
| C | 4.10204893  | 0.72345749  | 10.62483472 |
| C | 4.10204955  | -0.72345735 | 10.62481760 |
| C | 2.67755703  | -3.19074984 | 10.62483472 |
| C | 1.42449234  | -3.91420779 | 10.62481760 |
| C | -3.18144422 | -2.66235240 | 11.87912627 |
| C | -3.89638766 | -1.42403383 | 11.87911455 |
| C | -3.89638692 | 1.42403532  | 11.87912627 |
| C | -3.18144330 | 2.66235378  | 11.87911455 |
| C | -0.71494270 | 4.08638771  | 11.87912627 |
| C | 0.71494436  | 4.08638761  | 11.87911455 |
| C | 3.18144422  | 2.66235240  | 11.87912627 |
| C | 3.89638766  | 1.42403383  | 11.87911455 |
| C | 3.89638692  | -1.42403532 | 11.87912627 |
| C | 3.18144330  | -2.66235378 | 11.87911455 |
| C | 0.71494270  | -4.08638771 | 11.87912627 |
| C | -0.71494436 | -4.08638761 | 11.87911455 |
| C | -4.09747566 | -0.72605004 | 13.14025739 |
| C | -4.09747505 | 0.72605271  | 13.14025852 |
| C | -2.67751561 | 3.18549299  | 13.14025739 |
| C | -1.41995743 | 3.91154384  | 13.14025852 |
| C | 1.41996005  | 3.91154303  | 13.14025739 |
| C | 2.67751762  | 3.18549112  | 13.14025852 |
| C | 4.09747566  | 0.72605004  | 13.14025739 |
| C | 4.09747505  | -0.72605271 | 13.14025852 |
| C | 2.67751561  | -3.18549299 | 13.14025739 |
| C | 1.41995743  | -3.91154384 | 13.14025852 |
| C | -1.41996005 | -3.91154303 | 13.14025739 |
| C | -2.67751762 | -3.18549112 | 13.14025852 |
| C | -3.95825528 | 1.43716952  | 14.38049300 |
| C | -3.22375284 | 2.70936626  | 14.38050329 |
| C | -0.73450233 | 4.14653439  | 14.38049300 |



|   |             |             |              |
|---|-------------|-------------|--------------|
| C | 0.73450359  | 4.14653499  | 14.38050329  |
| C | 3.22375295  | 2.70936487  | 14.38049300  |
| C | 3.95825643  | 1.43716872  | 14.38050329  |
| C | 3.95825528  | -1.43716952 | 14.38049300  |
| C | 3.22375284  | -2.70936626 | 14.38050329  |
| C | 0.73450233  | -4.14653439 | 14.38049300  |
| C | -0.73450359 | -4.14653499 | 14.38050329  |
| C | -3.22375295 | -2.70936487 | 14.38049300  |
| C | -3.95825643 | -1.43716872 | 14.38050329  |
| C | -2.70507614 | 3.30182057  | 15.59636437  |
| C | -1.50692263 | 3.99357590  | 15.59637561  |
| C | 1.50692243  | 3.99357494  | 15.59636437  |
| C | 2.70507687  | 3.30182123  | 15.59637561  |
| C | 4.21199857  | 0.69175437  | 15.59636437  |
| C | 4.21199950  | -0.69175467 | 15.59637561  |
| C | 2.70507614  | -3.30182057 | 15.59636437  |
| C | 1.50692263  | -3.99357590 | 15.59637561  |
| C | -1.50692243 | -3.99357494 | 15.59636437  |
| C | -2.70507687 | -3.30182123 | 15.59637561  |
| C | -4.21199857 | -0.69175437 | 15.59636437  |
| C | -4.21199950 | 0.69175467  | 15.59637561  |
| H | -4.31786761 | 1.07566827  | -16.55211660 |
| H | -3.09048834 | 3.20154893  | -16.55212034 |
| H | -1.22737776 | 4.27721717  | -16.55211660 |
| H | 1.22737854  | 4.27721588  | -16.55212034 |
| H | 3.09048985  | 3.20154890  | -16.55211660 |
| H | 4.31786687  | 1.07566694  | -16.55212034 |
| H | 4.31786761  | -1.07566827 | -16.55211660 |
| H | 3.09048834  | -3.20154893 | -16.55212034 |
| H | 1.22737776  | -4.27721717 | -16.55211660 |
| H | -1.22737854 | -4.27721588 | -16.55212034 |
| H | -3.09048985 | -3.20154890 | -16.55211660 |
| H | -4.31786687 | -1.07566694 | -16.55212034 |
| H | -3.20154893 | 3.09048834  | 16.55212034  |
| H | -1.07566827 | 4.31786761  | 16.55211660  |
| H | 1.07566694  | 4.31786687  | 16.55212034  |
| H | 3.20154890  | 3.09048985  | 16.55211660  |
| H | 4.27721588  | 1.22737854  | 16.55212034  |
| H | 4.27721717  | -1.22737776 | 16.55211660  |
| H | 3.20154893  | -3.09048834 | 16.55212034  |
| H | 1.07566827  | -4.31786761 | 16.55211660  |
| H | -1.07566694 | -4.31786687 | 16.55212034  |
| H | -3.20154890 | -3.09048985 | 16.55211660  |
| H | -4.27721588 | -1.22737854 | 16.55212034  |
| H | -4.27721717 | 1.22737776  | 16.55211660  |

Nanotube (6,6) ul3v6s  
B3LYP/STO-3G Energy: -12211.867269

|   |             |             |              |
|---|-------------|-------------|--------------|
| C | -3.46523844 | 2.48861980  | -16.22981278 |
| C | -2.48861980 | 3.46523844  | -16.22981278 |
| C | 0.42258874  | 4.24529442  | -16.22981278 |
| C | 1.75667462  | 3.88782719  | -16.22981278 |
| C | 3.88782719  | 1.75667462  | -16.22981278 |
| C | 4.24529442  | 0.42258874  | -16.22981278 |
| C | 3.46523844  | -2.48861980 | -16.22981278 |
| C | 2.48861980  | -3.46523844 | -16.22981278 |
| C | -0.42258874 | -4.24529442 | -16.22981278 |
| C | -1.75667462 | -3.88782719 | -16.22981278 |
| C | -3.88782719 | -1.75667462 | -16.22981278 |
| C | -4.24529442 | -0.42258874 | -16.22981278 |
| C | -1.77965480 | 3.81223271  | -15.01157403 |
| C | -0.36489009 | 4.19131777  | -15.01157403 |
| C | 2.41166298  | 3.44734262  | -15.01157403 |
| C | 3.44734262  | 2.41166298  | -15.01157403 |
| C | 4.19131777  | -0.36489009 | -15.01157403 |
| C | 3.81223271  | -1.77965480 | -15.01157403 |
| C | 1.77965480  | -3.81223271 | -15.01157403 |

|   |             |             |              |
|---|-------------|-------------|--------------|
| C | 0.36489009  | -4.19131777 | -15.01157403 |
| C | -2.41166298 | -3.44734262 | -15.01157403 |
| C | -3.44734262 | -2.41166298 | -15.01157403 |
| C | -4.19131777 | 0.36489009  | -15.01157403 |
| C | -3.81223271 | 1.77965480  | -15.01157403 |
| C | 0.35878832  | 4.14589692  | -13.77065585 |
| C | 1.76222866  | 3.76984622  | -13.77065585 |
| C | 3.76984622  | 1.76222866  | -13.77065585 |
| C | 4.14589692  | 0.35878832  | -13.77065585 |
| C | 3.41105789  | -2.38366826 | -13.77065585 |
| C | 2.38366826  | -3.41105789 | -13.77065585 |
| C | -0.35878832 | -4.14589692 | -13.77065585 |
| C | -1.76222866 | -3.76984622 | -13.77065585 |
| C | -3.76984622 | -1.76222866 | -13.77065585 |
| C | -4.14589692 | -0.35878832 | -13.77065585 |
| C | -3.41105789 | 2.38366826  | -13.77065585 |
| C | -2.38366826 | 3.41105789  | -13.77065585 |
| C | 2.38346583  | 3.39390355  | -12.51124939 |
| C | 3.39390355  | 2.38346583  | -12.51124939 |
| C | 4.13093960  | -0.36719018 | -12.51124939 |
| C | 3.76109373  | -1.74747378 | -12.51124939 |
| C | 1.74747378  | -3.76109373 | -12.51124939 |
| C | 0.36719018  | -4.13093960 | -12.51124939 |
| C | -2.38346583 | -3.39390355 | -12.51124939 |
| C | -3.39390355 | -2.38346583 | -12.51124939 |
| C | -4.13093960 | 0.36719018  | -12.51124939 |
| C | -3.76109373 | 1.74747378  | -12.51124939 |
| C | -1.74747378 | 3.76109373  | -12.51124939 |
| C | -0.36719018 | 4.13093960  | -12.51124939 |
| C | 3.77236111  | 1.75735160  | -11.25472577 |
| C | 4.14563635  | 0.36426942  | -11.25472577 |
| C | 3.40809168  | -2.38828475 | -11.25472577 |
| C | 2.38828475  | -3.40809168 | -11.25472577 |
| C | -0.36426942 | -4.14563635 | -11.25472577 |
| C | -1.75735160 | -3.77236111 | -11.25472577 |
| C | -3.77236111 | -1.75735160 | -11.25472577 |
| C | -4.14563635 | -0.36426942 | -11.25472577 |
| C | -3.40809168 | 2.38828475  | -11.25472577 |
| C | -2.38828475 | 3.40809168  | -11.25472577 |
| C | 0.36426942  | 4.14563635  | -11.25472577 |
| C | 1.75735160  | 3.77236111  | -11.25472577 |
| C | 4.15533404  | -0.36268116 | -10.00947692 |
| C | 3.77996543  | -1.76357592 | -10.00947692 |
| C | 1.76357592  | -3.77996543 | -10.00947692 |
| C | 0.36268116  | -4.15533404 | -10.00947692 |
| C | -2.39175812 | -3.41728426 | -10.00947692 |
| C | -3.41728426 | -2.39175812 | -10.00947692 |
| C | -4.15533404 | 0.36268116  | -10.00947692 |
| C | -3.77996543 | 1.76357592  | -10.00947692 |
| C | -1.76357592 | 3.77996543  | -10.00947692 |
| C | -0.36268116 | 4.15533404  | -10.00947692 |
| C | 2.39175812  | 3.41728426  | -10.00947692 |
| C | 3.41728426  | 2.39175812  | -10.00947692 |
| C | 3.40926734  | -2.39212682 | -8.75934865  |
| C | 2.39212682  | -3.40926734 | -8.75934865  |
| C | -0.36700893 | -4.14857554 | -8.75934865  |
| C | -1.75644872 | -3.77627627 | -8.75934865  |
| C | -3.77627627 | -1.75644872 | -8.75934865  |
| C | -4.14857554 | -0.36700893 | -8.75934865  |
| C | -3.40926734 | 2.39212682  | -8.75934865  |
| C | -2.39212682 | 3.40926734  | -8.75934865  |
| C | 0.36700893  | 4.14857554  | -8.75934865  |
| C | 1.75644872  | 3.77627627  | -8.75934865  |
| C | 3.77627627  | 1.75644872  | -8.75934865  |
| C | 4.14857554  | 0.36700893  | -8.75934865  |
| C | 1.75747545  | -3.77671927 | -7.50307561  |
| C | 0.36634125  | -4.14947256 | -7.50307561  |
| C | -2.39199711 | -3.41037803 | -7.50307561  |
| C | -3.41037803 | -2.39199711 | -7.50307561  |
| C | -4.14947256 | 0.36634125  | -7.50307561  |

|   |             |             |             |
|---|-------------|-------------|-------------|
| C | -3.77671927 | 1.75747545  | -7.50307561 |
| C | -1.75747545 | 3.77671927  | -7.50307561 |
| C | -0.36634125 | 4.14947256  | -7.50307561 |
| C | 2.39199711  | 3.41037803  | -7.50307561 |
| C | 3.41037803  | 2.39199711  | -7.50307561 |
| C | 4.14947256  | -0.36634125 | -7.50307561 |
| C | 3.77671927  | -1.75747545 | -7.50307561 |
| C | -0.36322011 | -4.15642671 | -6.25439515 |
| C | -1.76365551 | -3.78118117 | -6.25439515 |
| C | -3.78118117 | -1.76365551 | -6.25439515 |
| C | -4.15642671 | -0.36322011 | -6.25439515 |
| C | -3.41796106 | 2.39277119  | -6.25439515 |
| C | -2.39277119 | 3.41796106  | -6.25439515 |
| C | 0.36322011  | 4.15642671  | -6.25439515 |
| C | 1.76365551  | 3.78118117  | -6.25439515 |
| C | 3.78118117  | 1.76365551  | -6.25439515 |
| C | 4.15642671  | 0.36322011  | -6.25439515 |
| C | 3.41796106  | -2.39277119 | -6.25439515 |
| C | 2.39277119  | -3.41796106 | -6.25439515 |
| C | -2.39225474 | -3.41211754 | -5.00685515 |
| C | -3.41211754 | -2.39225474 | -5.00685515 |
| C | -4.15110784 | 0.36569461  | -5.00685515 |
| C | -3.77781215 | 1.75885310  | -5.00685515 |
| C | -1.75885310 | 3.77781215  | -5.00685515 |
| C | -0.36569461 | 4.15110784  | -5.00685515 |
| C | 2.39225474  | 3.41211754  | -5.00685515 |
| C | 3.41211754  | 2.39225474  | -5.00685515 |
| C | 4.15110784  | -0.36569461 | -5.00685515 |
| C | 3.77781215  | -1.75885310 | -5.00685515 |
| C | 1.75885310  | -3.77781215 | -5.00685515 |
| C | 0.36569461  | -4.15110784 | -5.00685515 |
| C | -3.77541122 | -1.75605790 | -3.75163137 |
| C | -4.14763098 | -0.36691486 | -3.75163137 |
| C | -3.40849636 | 2.39157308  | -3.75163137 |
| C | -2.39157308 | 3.40849636  | -3.75163137 |
| C | 0.36691486  | 4.14763098  | -3.75163137 |
| C | 1.75605790  | 3.77541122  | -3.75163137 |
| C | 3.77541122  | 1.75605790  | -3.75163137 |
| C | 4.14763098  | 0.36691486  | -3.75163137 |
| C | 3.40849636  | -2.39157308 | -3.75163137 |
| C | 2.39157308  | -3.40849636 | -3.75163137 |
| C | -0.36691486 | -4.14763098 | -3.75163137 |
| C | -1.75605790 | -3.77541122 | -3.75163137 |
| C | -4.15458359 | 0.36374285  | -2.50022354 |
| C | -3.77984636 | 1.76228125  | -2.50022354 |
| C | -1.76228125 | 3.77984636  | -2.50022354 |
| C | -0.36374285 | 4.15458359  | -2.50022354 |
| C | 2.39230234  | 3.41610351  | -2.50022354 |
| C | 3.41610351  | 2.39230234  | -2.50022354 |
| C | 4.15458359  | -0.36374285 | -2.50022354 |
| C | 3.77984636  | -1.76228125 | -2.50022354 |
| C | 1.76228125  | -3.77984636 | -2.50022354 |
| C | 0.36374285  | -4.15458359 | -2.50022354 |
| C | -2.39230234 | -3.41610351 | -2.50022354 |
| C | -3.41610351 | -2.39230234 | -2.50022354 |
| C | -3.41442934 | 2.39233814  | -1.25367012 |
| C | -2.39233814 | 3.41442934  | -1.25367012 |
| C | 0.36461093  | 4.15315161  | -1.25367012 |
| C | 1.76081348  | 3.77904027  | -1.25367012 |
| C | 3.77904027  | 1.76081348  | -1.25367012 |
| C | 4.15315161  | 0.36461093  | -1.25367012 |
| C | 3.41442934  | -2.39233814 | -1.25367012 |
| C | 2.39233814  | -3.41442934 | -1.25367012 |
| C | -0.36461093 | -4.15315161 | -1.25367012 |
| C | -1.76081348 | -3.77904027 | -1.25367012 |
| C | -3.77904027 | -1.76081348 | -1.25367012 |
| C | -4.15315161 | -0.36461093 | -1.25367012 |
| C | -1.75587388 | 3.77559636  | 0.00000000  |
| C | -0.36716679 | 4.14769930  | 0.00000000  |
| C | 2.39182542  | 3.40842956  | 0.00000000  |

|   |             |             |            |
|---|-------------|-------------|------------|
| C | 3.40842956  | 2.39182542  | 0.00000000 |
| C | 4.14769930  | -0.36716679 | 0.00000000 |
| C | 3.77559636  | -1.75587388 | 0.00000000 |
| C | 1.75587388  | -3.77559636 | 0.00000000 |
| C | 0.36716679  | -4.14769930 | 0.00000000 |
| C | -2.39182542 | -3.40842956 | 0.00000000 |
| C | -3.40842956 | -2.39182542 | 0.00000000 |
| C | -4.14769930 | 0.36716679  | 0.00000000 |
| C | -3.77559636 | 1.75587388  | 0.00000000 |
| C | 0.36461093  | 4.15315161  | 1.25367012 |
| C | 1.76081348  | 3.77904027  | 1.25367012 |
| C | 3.77904027  | 1.76081348  | 1.25367012 |
| C | 4.15315161  | 0.36461093  | 1.25367012 |
| C | 3.41442934  | -2.39233814 | 1.25367012 |
| C | 2.39233814  | -3.41442934 | 1.25367012 |
| C | -0.36461093 | -4.15315161 | 1.25367012 |
| C | -1.76081348 | -3.77904027 | 1.25367012 |
| C | -3.77904027 | -1.76081348 | 1.25367012 |
| C | -4.15315161 | -0.36461093 | 1.25367012 |
| C | -3.41442934 | 2.39233814  | 1.25367012 |
| C | -2.39233814 | 3.41442934  | 1.25367012 |
| C | 2.39230234  | 3.41610351  | 2.50022354 |
| C | 3.41610351  | 2.39230234  | 2.50022354 |
| C | 4.15458359  | -0.36374285 | 2.50022354 |
| C | 3.77984636  | -1.76228125 | 2.50022354 |
| C | 1.76228125  | -3.77984636 | 2.50022354 |
| C | 0.36374285  | -4.15458359 | 2.50022354 |
| C | -2.39230234 | -3.41610351 | 2.50022354 |
| C | -3.41610351 | -2.39230234 | 2.50022354 |
| C | -4.15458359 | 0.36374285  | 2.50022354 |
| C | -3.77984636 | 1.76228125  | 2.50022354 |
| C | -1.76228125 | 3.77984636  | 2.50022354 |
| C | -0.36374285 | 4.15458359  | 2.50022354 |
| C | 3.77541122  | 1.75605790  | 3.75163137 |
| C | 4.14763098  | 0.36691486  | 3.75163137 |
| C | 3.40849636  | -2.39157308 | 3.75163137 |
| C | 2.39157308  | -3.40849636 | 3.75163137 |
| C | -0.36691486 | -4.14763098 | 3.75163137 |
| C | -1.75605790 | -3.77541122 | 3.75163137 |
| C | -3.77541122 | -1.75605790 | 3.75163137 |
| C | -4.14763098 | -0.36691486 | 3.75163137 |
| C | -3.40849636 | 2.39157308  | 3.75163137 |
| C | -2.39157308 | 3.40849636  | 3.75163137 |
| C | 0.36691486  | 4.14763098  | 3.75163137 |
| C | 1.75605790  | 3.77541122  | 3.75163137 |
| C | 4.15110784  | -0.36569461 | 5.00685515 |
| C | 3.77781215  | -1.75885310 | 5.00685515 |
| C | 1.75885310  | -3.77781215 | 5.00685515 |
| C | 0.36569461  | -4.15110784 | 5.00685515 |
| C | -2.39225474 | -3.41211754 | 5.00685515 |
| C | -3.41211754 | -2.39225474 | 5.00685515 |
| C | -4.15110784 | 0.36569461  | 5.00685515 |
| C | -3.77781215 | 1.75885310  | 5.00685515 |
| C | -1.75885310 | 3.77781215  | 5.00685515 |
| C | -0.36569461 | 4.15110784  | 5.00685515 |
| C | 2.39225474  | 3.41211754  | 5.00685515 |
| C | 3.41211754  | 2.39225474  | 5.00685515 |
| C | 3.41796106  | -2.39277119 | 6.25439515 |
| C | 2.39277119  | -3.41796106 | 6.25439515 |
| C | -0.36322011 | -4.15642671 | 6.25439515 |
| C | -1.76365551 | -3.78118117 | 6.25439515 |
| C | -3.78118117 | -1.76365551 | 6.25439515 |
| C | -4.15642671 | -0.36322011 | 6.25439515 |
| C | -3.41796106 | 2.39277119  | 6.25439515 |
| C | -2.39277119 | 3.41796106  | 6.25439515 |
| C | 0.36322011  | 4.15642671  | 6.25439515 |
| C | 1.76365551  | 3.78118117  | 6.25439515 |
| C | 3.78118117  | 1.76365551  | 6.25439515 |
| C | 4.15642671  | 0.36322011  | 6.25439515 |
| C | 1.75747545  | -3.77671927 | 7.50307561 |

|   |             |             |             |
|---|-------------|-------------|-------------|
| C | 0.36634125  | -4.14947256 | 7.50307561  |
| C | -2.39199711 | -3.41037803 | 7.50307561  |
| C | -3.41037803 | -2.39199711 | 7.50307561  |
| C | -4.14947256 | 0.36634125  | 7.50307561  |
| C | -3.77671927 | 1.75747545  | 7.50307561  |
| C | -1.75747545 | 3.77671927  | 7.50307561  |
| C | -0.36634125 | 4.14947256  | 7.50307561  |
| C | 2.39199711  | 3.41037803  | 7.50307561  |
| C | 3.41037803  | 2.39199711  | 7.50307561  |
| C | 4.14947256  | -0.36634125 | 7.50307561  |
| C | 3.77671927  | -1.75747545 | 7.50307561  |
| C | -0.36700893 | -4.14857554 | 8.75934865  |
| C | -1.75644872 | -3.77627627 | 8.75934865  |
| C | -3.77627627 | -1.75644872 | 8.75934865  |
| C | -4.14857554 | -0.36700893 | 8.75934865  |
| C | -3.40926734 | 2.39212682  | 8.75934865  |
| C | -2.39212682 | 3.40926734  | 8.75934865  |
| C | 0.36700893  | 4.14857554  | 8.75934865  |
| C | 1.75644872  | 3.77627627  | 8.75934865  |
| C | 3.77627627  | 1.75644872  | 8.75934865  |
| C | 4.14857554  | 0.36700893  | 8.75934865  |
| C | 3.40926734  | -2.39212682 | 8.75934865  |
| C | 2.39212682  | -3.40926734 | 8.75934865  |
| C | -2.39175812 | -3.41728426 | 10.00947692 |
| C | -3.41728426 | -2.39175812 | 10.00947692 |
| C | -4.15533404 | 0.36268116  | 10.00947692 |
| C | -3.77996543 | 1.76357592  | 10.00947692 |
| C | -1.76357592 | 3.77996543  | 10.00947692 |
| C | -0.36268116 | 4.15533404  | 10.00947692 |
| C | 2.39175812  | 3.41728426  | 10.00947692 |
| C | 3.41728426  | 2.39175812  | 10.00947692 |
| C | 4.15533404  | -0.36268116 | 10.00947692 |
| C | 3.77996543  | -1.76357592 | 10.00947692 |
| C | 1.76357592  | -3.77996543 | 10.00947692 |
| C | 0.36268116  | -4.15533404 | 10.00947692 |
| C | -3.77236111 | -1.75735160 | 11.25472577 |
| C | -4.14563635 | -0.36426942 | 11.25472577 |
| C | -3.40809168 | 2.38828475  | 11.25472577 |
| C | -2.38828475 | 3.40809168  | 11.25472577 |
| C | 0.36426942  | 4.14563635  | 11.25472577 |
| C | 1.75735160  | 3.77236111  | 11.25472577 |
| C | 3.77236111  | 1.75735160  | 11.25472577 |
| C | 4.14563635  | 0.36426942  | 11.25472577 |
| C | 3.40809168  | -2.38828475 | 11.25472577 |
| C | 2.38828475  | -3.40809168 | 11.25472577 |
| C | -0.36426942 | -4.14563635 | 11.25472577 |
| C | -1.75735160 | -3.77236111 | 11.25472577 |
| C | -4.13093960 | 0.36719018  | 12.51124939 |
| C | -3.76109373 | 1.74747378  | 12.51124939 |
| C | -1.74747378 | 3.76109373  | 12.51124939 |
| C | -0.36719018 | 4.13093960  | 12.51124939 |
| C | 2.38346583  | 3.39390355  | 12.51124939 |
| C | 3.39390355  | 2.38346583  | 12.51124939 |
| C | 4.13093960  | -0.36719018 | 12.51124939 |
| C | 3.76109373  | -1.74747378 | 12.51124939 |
| C | 1.74747378  | -3.76109373 | 12.51124939 |
| C | 0.36719018  | -4.13093960 | 12.51124939 |
| C | -2.38346583 | -3.39390355 | 12.51124939 |
| C | -3.39390355 | -2.38346583 | 12.51124939 |
| C | -3.41105789 | 2.38366826  | 13.77065585 |
| C | -2.38366826 | 3.41105789  | 13.77065585 |
| C | 0.35878832  | 4.14589692  | 13.77065585 |
| C | 1.76222866  | 3.76984622  | 13.77065585 |
| C | 3.76984622  | 1.76222866  | 13.77065585 |
| C | 4.14589692  | 0.35878832  | 13.77065585 |
| C | 3.41105789  | -2.38366826 | 13.77065585 |
| C | 2.38366826  | -3.41105789 | 13.77065585 |
| C | -0.35878832 | -4.14589692 | 13.77065585 |
| C | -1.76222866 | -3.76984622 | 13.77065585 |
| C | -3.76984622 | -1.76222866 | 13.77065585 |

|   |             |             |              |
|---|-------------|-------------|--------------|
| C | -4.14589692 | -0.35878832 | 13.77065585  |
| C | -1.77965480 | 3.81223271  | 15.01157403  |
| C | -0.36489009 | 4.19131777  | 15.01157403  |
| C | 2.41166298  | 3.44734262  | 15.01157403  |
| C | 3.44734262  | 2.41166298  | 15.01157403  |
| C | 4.19131777  | -0.36489009 | 15.01157403  |
| C | 3.81223271  | -1.77965480 | 15.01157403  |
| C | 1.77965480  | -3.81223271 | 15.01157403  |
| C | 0.36489009  | -4.19131777 | 15.01157403  |
| C | -2.41166298 | -3.44734262 | 15.01157403  |
| C | -3.44734262 | -2.41166298 | 15.01157403  |
| C | -4.19131777 | 0.36489009  | 15.01157403  |
| C | -3.81223271 | 1.77965480  | 15.01157403  |
| C | 0.42258874  | 4.24529442  | 16.22981278  |
| C | 1.75667462  | 3.88782719  | 16.22981278  |
| C | 3.88782719  | 1.75667462  | 16.22981278  |
| C | 4.24529442  | 0.42258874  | 16.22981278  |
| C | 3.46523844  | -2.48861980 | 16.22981278  |
| C | 2.48861980  | -3.46523844 | 16.22981278  |
| C | -0.42258874 | -4.24529442 | 16.22981278  |
| C | -1.75667462 | -3.88782719 | 16.22981278  |
| C | -3.88782719 | -1.75667462 | 16.22981278  |
| C | -4.24529442 | -0.42258874 | 16.22981278  |
| C | -3.46523844 | 2.48861980  | 16.22981278  |
| C | -2.48861980 | 3.46523844  | 16.22981278  |
| H | -3.89469650 | 2.15851096  | -17.18441287 |
| H | -2.15851096 | 3.89469650  | -17.18441287 |
| H | -0.07802292 | 4.45216159  | -17.18441287 |
| H | 2.29365063  | 3.81667357  | -17.18441287 |
| H | 3.81667357  | 2.29365063  | -17.18441287 |
| H | 4.45216159  | -0.07802292 | -17.18441287 |
| H | 3.89469650  | -2.15851096 | -17.18441287 |
| H | 2.15851096  | -3.89469650 | -17.18441287 |
| H | 0.07802292  | -4.45216159 | -17.18441287 |
| H | -2.29365063 | -3.81667357 | -17.18441287 |
| H | -3.81667357 | -2.29365063 | -17.18441287 |
| H | -4.45216159 | 0.07802292  | -17.18441287 |
| H | -0.07802292 | 4.45216159  | 17.18441287  |
| H | 2.29365063  | 3.81667357  | 17.18441287  |
| H | 3.81667357  | 2.29365063  | 17.18441287  |
| H | 4.45216159  | -0.07802292 | 17.18441287  |
| H | 3.89469650  | -2.15851096 | 17.18441287  |
| H | 2.15851096  | -3.89469650 | 17.18441287  |
| H | 0.07802292  | -4.45216159 | 17.18441287  |
| H | -2.29365063 | -3.81667357 | 17.18441287  |
| H | -3.81667357 | -2.29365063 | 17.18441287  |
| H | -4.45216159 | 0.07802292  | 17.18441287  |
| H | -3.89469650 | 2.15851096  | 17.18441287  |
| H | -2.15851096 | 3.89469650  | 17.18441287  |

Nanotube (6,6) u14v0s  
B3LYP/STO-3G Energy: -12663.650694

|   |             |             |             |
|---|-------------|-------------|-------------|
| C | -3.31736835 | 2.71596652  | 16.82910616 |
| C | -4.01078365 | 1.51493878  | 16.82909909 |
| C | -4.01078018 | -1.51494200 | 16.82910616 |
| C | -3.31736729 | -2.71597114 | 16.82909909 |
| C | -0.69341183 | -4.23090852 | 16.82910616 |
| C | 0.69341635  | -4.23090992 | 16.82909909 |
| C | 3.31736835  | -2.71596652 | 16.82910616 |
| C | 4.01078365  | -1.51493878 | 16.82909909 |
| C | 4.01078018  | 1.51494200  | 16.82910616 |
| C | 3.31736729  | 2.71597114  | 16.82909909 |
| C | 0.69341183  | 4.23090852  | 16.82910616 |
| C | -0.69341635 | 4.23090992  | 16.82909909 |
| C | -4.15436814 | 0.73726854  | 15.61864836 |
| C | -4.15436703 | -0.73727037 | 15.61863308 |
| C | -2.71567736 | -3.22915407 | 15.61864836 |

|   |             |             |             |
|---|-------------|-------------|-------------|
| C | -1.43868865 | -3.96642256 | 15.61863308 |
| C | 1.43869078  | -3.96642262 | 15.61864836 |
| C | 2.71567838  | -3.22915220 | 15.61863308 |
| C | 4.15436814  | -0.73726854 | 15.61864836 |
| C | 4.15436703  | 0.73727037  | 15.61863308 |
| C | 2.71567736  | 3.22915407  | 15.61864836 |
| C | 1.43868865  | 3.96642256  | 15.61863308 |
| C | -1.43869078 | 3.96642262  | 15.61864836 |
| C | -2.71567838 | 3.22915220  | 15.61863308 |
| C | -3.91066323 | -1.42001758 | 14.37883126 |
| C | -3.18510463 | -2.67671875 | 14.37878672 |
| C | -0.72556031 | -4.09674250 | 14.37883126 |
| C | 0.72555412  | -4.09674089 | 14.37878672 |
| C | 3.18510292  | -2.67672491 | 14.37883126 |
| C | 3.91065875  | -1.42002215 | 14.37878672 |
| C | 3.91066323  | 1.42001758  | 14.37883126 |
| C | 3.18510463  | 2.67671875  | 14.37878672 |
| C | 0.72556031  | 4.09674250  | 14.37883126 |
| C | -0.72555412 | 4.09674089  | 14.37878672 |
| C | -3.18510292 | 2.67672491  | 14.37883126 |
| C | -3.91065875 | 1.42002215  | 14.37878672 |
| C | -2.66336184 | -3.18150649 | 13.11621858 |
| C | -1.42360138 | -3.89728649 | 13.11621006 |
| C | 1.42358452  | -3.89729226 | 13.11621858 |
| C | 2.66334842  | -3.18151821 | 13.11621006 |
| C | 4.08694636  | -0.71578577 | 13.11621858 |
| C | 4.08694980  | 0.71576829  | 13.11621006 |
| C | 2.66336184  | 3.18150649  | 13.11621858 |
| C | 1.42360138  | 3.89728649  | 13.11621006 |
| C | -1.42358452 | 3.89729226  | 13.11621858 |
| C | -2.66334842 | 3.18151821  | 13.11621006 |
| C | -4.08694636 | 0.71578577  | 13.11621858 |
| C | -4.08694980 | -0.71576829 | 13.11621006 |
| C | -0.72566979 | -4.10570726 | 11.86539861 |
| C | 0.72565497  | -4.10570811 | 11.86544786 |
| C | 3.19281189  | -2.68130210 | 11.86539861 |
| C | 3.91847501  | -1.42441842 | 11.86544786 |
| C | 3.91848168  | 1.42440516  | 11.86539861 |
| C | 3.19282004  | 2.68128969  | 11.86544786 |
| C | 0.72566979  | 4.10570726  | 11.86539861 |
| C | -0.72565497 | 4.10570811  | 11.86544786 |
| C | -3.19281189 | 2.68130210  | 11.86539861 |
| C | -3.91847501 | 1.42441842  | 11.86544786 |
| C | -3.91848168 | -1.42440516 | 11.86539861 |
| C | -3.19282004 | -2.68128969 | 11.86544786 |
| C | 1.42716533  | -3.92062545 | 10.62301966 |
| C | 2.68177527  | -3.19627862 | 10.62310495 |
| C | 4.10894391  | -0.72435130 | 10.62301966 |
| C | 4.10894611  | 0.72434620  | 10.62310495 |
| C | 2.68177858  | 3.19627416  | 10.62301966 |
| C | 1.42717085  | 3.92062482  | 10.62310495 |
| C | -1.42716533 | 3.92062545  | 10.62301966 |
| C | -2.68177527 | 3.19627862  | 10.62310495 |
| C | -4.10894391 | 0.72435130  | 10.62301966 |
| C | -4.10894611 | -0.72434620 | 10.62310495 |
| C | -2.68177858 | -3.19627416 | 10.62301966 |
| C | -1.42717085 | -3.92062482 | 10.62310495 |
| C | 3.19498550  | -2.67582607 | 9.36877205  |
| C | 3.91482674  | -1.42902341 | 9.36884177  |
| C | 3.91482610  | 1.42902557  | 9.36877205  |
| C | 3.19498395  | 2.67582770  | 9.36884177  |
| C | 0.71984060  | 4.10485164  | 9.36877205  |
| C | -0.71984279 | 4.10485112  | 9.36884177  |
| C | -3.19498550 | 2.67582607  | 9.36877205  |
| C | -3.91482674 | 1.42902341  | 9.36884177  |
| C | -3.91482610 | -1.42902557 | 9.36877205  |
| C | -3.19498395 | -2.67582770 | 9.36884177  |
| C | -0.71984060 | -4.10485164 | 9.36877205  |
| C | 0.71984279  | -4.10485112 | 9.36884177  |
| C | 4.11093724  | -0.72544238 | 8.11783781  |

|   |             |             |            |
|---|-------------|-------------|------------|
| C | 4.11093666  | 0.72544209  | 8.11788285 |
| C | 2.68372015  | 3.19745489  | 8.11783781 |
| C | 1.42721705  | 3.92289662  | 8.11788285 |
| C | -1.42721709 | 3.92289728  | 8.11783781 |
| C | -2.68371961 | 3.19745453  | 8.11788285 |
| C | -4.11093724 | 0.72544238  | 8.11783781 |
| C | -4.11093666 | -0.72544209 | 8.11788285 |
| C | -2.68372015 | -3.19745489 | 8.11783781 |
| C | -1.42721705 | -3.92289662 | 8.11788285 |
| C | 1.42721709  | -3.92289728 | 8.11783781 |
| C | 2.68371961  | -3.19745453 | 8.11788285 |
| C | 3.92121878  | 1.42737130  | 6.87388788 |
| C | 3.19674949  | 2.68219043  | 6.87391808 |
| C | 0.72446958  | 4.10956072  | 6.87388788 |
| C | -0.72447031 | 4.10956148  | 6.87391808 |
| C | -3.19674919 | 2.68218943  | 6.87388788 |
| C | -3.92121979 | 1.42737105  | 6.87391808 |
| C | -3.92121878 | -1.42737130 | 6.87388788 |
| C | -3.19674949 | -2.68219043 | 6.87391808 |
| C | -0.72446958 | -4.10956072 | 6.87388788 |
| C | 0.72447031  | -4.10956148 | 6.87391808 |
| C | 3.19674919  | -2.68218943 | 6.87388788 |
| C | 3.92121979  | -1.42737105 | 6.87391808 |
| C | 2.67625165  | 3.19460678  | 5.62129115 |
| C | 1.42848292  | 3.91500624  | 5.62130556 |
| C | -1.42848480 | 3.91500530  | 5.62129115 |
| C | -2.67625340 | 3.19460562  | 5.62130556 |
| C | -4.10473645 | 0.72039852  | 5.62129115 |
| C | -4.10473632 | -0.72040062 | 5.62130556 |
| C | -2.67625165 | -3.19460678 | 5.62129115 |
| C | -1.42848292 | -3.91500624 | 5.62130556 |
| C | 1.42848480  | -3.91500530 | 5.62129115 |
| C | 2.67625340  | -3.19460562 | 5.62130556 |
| C | 4.10473645  | -0.72039852 | 5.62129115 |
| C | 4.10473632  | 0.72040062  | 5.62130556 |
| C | 0.72493492  | 4.11011375  | 4.36987300 |
| C | -0.72493909 | 4.11011245  | 4.36986170 |
| C | -3.19699546 | 2.68286893  | 4.36987300 |
| C | -3.92193134 | 1.42724056  | 4.36986170 |
| C | -3.92193038 | -1.42724481 | 4.36987300 |
| C | -3.19699225 | -2.68287189 | 4.36986170 |
| C | -0.72493492 | -4.11011375 | 4.36987300 |
| C | 0.72493909  | -4.11011245 | 4.36986170 |
| C | 3.19699546  | -2.68286893 | 4.36987300 |
| C | 3.92193134  | -1.42724056 | 4.36986170 |
| C | 3.92193038  | 1.42724481  | 4.36987300 |
| C | 3.19699225  | 2.68287189  | 4.36986170 |
| C | -1.42731377 | 3.92131572  | 3.12572623 |
| C | -2.68230465 | 3.19674661  | 3.12568827 |
| C | -4.10961591 | 0.72456788  | 3.12572623 |
| C | -4.10961610 | -0.72457066 | 3.12568827 |
| C | -2.68230215 | -3.19674784 | 3.12572623 |
| C | -1.42731145 | -3.92131727 | 3.12568827 |
| C | 1.42731377  | -3.92131572 | 3.12572623 |
| C | 2.68230465  | -3.19674661 | 3.12568827 |
| C | 4.10961591  | -0.72456788 | 3.12572623 |
| C | 4.10961610  | 0.72457066  | 3.12568827 |
| C | 2.68230215  | 3.19674784  | 3.12572623 |
| C | 1.42731145  | 3.92131727  | 3.12568827 |
| C | -3.19467787 | 2.67647399  | 1.87374897 |
| C | -3.91523404 | 1.42843379  | 1.87369333 |
| C | -3.91523340 | -1.42843519 | 1.87374897 |
| C | -3.19467697 | -2.67647525 | 1.87369333 |
| C | -0.72055554 | -4.10490919 | 1.87374897 |
| C | 0.72055707  | -4.10490903 | 1.87369333 |
| C | 3.19467787  | -2.67647399 | 1.87374897 |
| C | 3.91523404  | -1.42843379 | 1.87369333 |
| C | 3.91523340  | 1.42843519  | 1.87374897 |
| C | 3.19467697  | 2.67647525  | 1.87369333 |
| C | 0.72055554  | 4.10490919  | 1.87374897 |



|   |             |             |             |
|---|-------------|-------------|-------------|
| C | -0.72055707 | 4.10490903  | 1.87369333  |
| C | -4.10978523 | 0.72462748  | 0.62221575  |
| C | -4.10978445 | -0.72462908 | 0.62215261  |
| C | -2.68243842 | -3.19686467 | 0.62221575  |
| C | -1.42734503 | -3.92149227 | 0.62215261  |
| C | 1.42734681  | -3.92149215 | 0.62221575  |
| C | 2.68243941  | -3.19686320 | 0.62215261  |
| C | 4.10978523  | -0.72462748 | 0.62221575  |
| C | 4.10978445  | 0.72462908  | 0.62215261  |
| C | 2.68243842  | 3.19686467  | 0.62221575  |
| C | 1.42734503  | 3.92149227  | 0.62215261  |
| C | -1.42734681 | 3.92149215  | 0.62221575  |
| C | -2.68243941 | 3.19686320  | 0.62215261  |
| C | -3.92149227 | -1.42734503 | -0.62215261 |
| C | -3.19686467 | -2.68243842 | -0.62221575 |
| C | -0.72462908 | -4.10978445 | -0.62215261 |
| C | 0.72462748  | -4.10978523 | -0.62221575 |
| C | 3.19686320  | -2.68243941 | -0.62215261 |
| C | 3.92149215  | -1.42734681 | -0.62221575 |
| C | 3.92149227  | 1.42734503  | -0.62215261 |
| C | 3.19686467  | 2.68243842  | -0.62221575 |
| C | 0.72462908  | 4.10978445  | -0.62215261 |
| C | -0.72462748 | 4.10978523  | -0.62221575 |
| C | -3.19686320 | 2.68243941  | -0.62215261 |
| C | -3.92149215 | 1.42734681  | -0.62221575 |
| C | -2.67647525 | -3.19467697 | -1.87369333 |
| C | -1.42843519 | -3.91523340 | -1.87374897 |
| C | 1.42843379  | -3.91523404 | -1.87369333 |
| C | 2.67647399  | -3.19467787 | -1.87374897 |
| C | 4.10490903  | -0.72055707 | -1.87369333 |
| C | 4.10490919  | 0.72055554  | -1.87374897 |
| C | 2.67647525  | 3.19467697  | -1.87369333 |
| C | 1.42843519  | 3.91523340  | -1.87374897 |
| C | -1.42843379 | 3.91523404  | -1.87369333 |
| C | -2.67647399 | 3.19467787  | -1.87374897 |
| C | -4.10490903 | 0.72055707  | -1.87369333 |
| C | -4.10490919 | -0.72055554 | -1.87374897 |
| C | -0.72457066 | -4.10961610 | -3.12568827 |
| C | 0.72456788  | -4.10961591 | -3.12572623 |
| C | 3.19674661  | -2.68230465 | -3.12568827 |
| C | 3.92131572  | -1.42731377 | -3.12572623 |
| C | 3.92131727  | 1.42731145  | -3.12568827 |
| C | 3.19674784  | 2.68230215  | -3.12572623 |
| C | 0.72457066  | 4.10961610  | -3.12568827 |
| C | -0.72456788 | 4.10961591  | -3.12572623 |
| C | -3.19674661 | 2.68230465  | -3.12568827 |
| C | -3.92131572 | 1.42731377  | -3.12572623 |
| C | -3.92131727 | -1.42731145 | -3.12568827 |
| C | -3.19674784 | -2.68230215 | -3.12572623 |
| C | 1.42724056  | -3.92193134 | -4.36986170 |
| C | 2.68286893  | -3.19699546 | -4.36987300 |
| C | 4.11011245  | -0.72493909 | -4.36986170 |
| C | 4.11011375  | 0.72493492  | -4.36987300 |
| C | 2.68287189  | 3.19699225  | -4.36986170 |
| C | 1.42724481  | 3.92193038  | -4.36987300 |
| C | -1.42724056 | 3.92193134  | -4.36986170 |
| C | -2.68286893 | 3.19699546  | -4.36987300 |
| C | -4.11011245 | 0.72493909  | -4.36986170 |
| C | -4.11011375 | -0.72493492 | -4.36987300 |
| C | -2.68287189 | -3.19699225 | -4.36986170 |
| C | -1.42724481 | -3.92193038 | -4.36987300 |
| C | 3.19460562  | -2.67625340 | -5.62130556 |
| C | 3.91500530  | -1.42848480 | -5.62129115 |
| C | 3.91500624  | 1.42848292  | -5.62130556 |
| C | 3.19460678  | 2.67625165  | -5.62129115 |
| C | 0.72040062  | 4.10473632  | -5.62130556 |
| C | -0.72039852 | 4.10473645  | -5.62129115 |
| C | -3.19460562 | 2.67625340  | -5.62130556 |
| C | -3.91500530 | 1.42848480  | -5.62129115 |
| C | -3.91500624 | -1.42848292 | -5.62130556 |

|   |             |             |              |
|---|-------------|-------------|--------------|
| C | -3.19460678 | -2.67625165 | -5.62129115  |
| C | -0.72040062 | -4.10473632 | -5.62130556  |
| C | 0.72039852  | -4.10473645 | -5.62129115  |
| C | 4.10956148  | -0.72447031 | -6.87391808  |
| C | 4.10956072  | 0.72446958  | -6.87388788  |
| C | 2.68219043  | 3.19674949  | -6.87391808  |
| C | 1.42737130  | 3.92121878  | -6.87388788  |
| C | -1.42737105 | 3.92121979  | -6.87391808  |
| C | -2.68218943 | 3.19674919  | -6.87388788  |
| C | -4.10956148 | 0.72447031  | -6.87391808  |
| C | -4.10956072 | -0.72446958 | -6.87388788  |
| C | -2.68219043 | -3.19674949 | -6.87391808  |
| C | -1.42737130 | -3.92121878 | -6.87388788  |
| C | 1.42737105  | -3.92121979 | -6.87391808  |
| C | 2.68218943  | -3.19674919 | -6.87388788  |
| C | 3.92289662  | 1.42721705  | -8.11788285  |
| C | 3.19745489  | 2.68372015  | -8.11783781  |
| C | 0.72544209  | 4.11093666  | -8.11788285  |
| C | -0.72544238 | 4.11093724  | -8.11783781  |
| C | -3.19745453 | 2.68371961  | -8.11788285  |
| C | -3.92289728 | 1.42721709  | -8.11783781  |
| C | -3.92289662 | -1.42721705 | -8.11788285  |
| C | -3.19745489 | -2.68372015 | -8.11783781  |
| C | -0.72544209 | -4.11093666 | -8.11788285  |
| C | 0.72544238  | -4.11093724 | -8.11783781  |
| C | 3.19745453  | -2.68371961 | -8.11788285  |
| C | 3.92289728  | -1.42721709 | -8.11783781  |
| C | 2.67582770  | 3.19498395  | -9.36884177  |
| C | 1.42902557  | 3.91482610  | -9.36877205  |
| C | -1.42902341 | 3.91482674  | -9.36884177  |
| C | -2.67582607 | 3.19498550  | -9.36877205  |
| C | -4.10485112 | 0.71984279  | -9.36884177  |
| C | -4.10485164 | -0.71984060 | -9.36877205  |
| C | -2.67582770 | -3.19498395 | -9.36884177  |
| C | -1.42902557 | -3.91482610 | -9.36877205  |
| C | 1.42902341  | -3.91482674 | -9.36884177  |
| C | 2.67582607  | -3.19498550 | -9.36877205  |
| C | 4.10485112  | -0.71984279 | -9.36884177  |
| C | 4.10485164  | 0.71984060  | -9.36877205  |
| C | 0.72434620  | 4.10894611  | -10.62310495 |
| C | -0.72435130 | 4.10894391  | -10.62301966 |
| C | -3.19627862 | 2.68177527  | -10.62310495 |
| C | -3.92062545 | 1.42716533  | -10.62301966 |
| C | -3.92062482 | -1.42717085 | -10.62310495 |
| C | -3.19627416 | -2.68177858 | -10.62301966 |
| C | -0.72434620 | -4.10894611 | -10.62310495 |
| C | 0.72435130  | -4.10894391 | -10.62301966 |
| C | 3.19627862  | -2.68177527 | -10.62310495 |
| C | 3.92062545  | -1.42716533 | -10.62301966 |
| C | 3.92062482  | 1.42717085  | -10.62310495 |
| C | 3.19627416  | 2.68177858  | -10.62301966 |
| C | -1.42441842 | 3.91847501  | -11.86544786 |
| C | -2.68130210 | 3.19281189  | -11.86539861 |
| C | -4.10570811 | 0.72565497  | -11.86544786 |
| C | -4.10570726 | -0.72566979 | -11.86539861 |
| C | -2.68128969 | -3.19282004 | -11.86544786 |
| C | -1.42440516 | -3.91848168 | -11.86539861 |
| C | 1.42441842  | -3.91847501 | -11.86544786 |
| C | 2.68130210  | -3.19281189 | -11.86539861 |
| C | 4.10570811  | -0.72565497 | -11.86544786 |
| C | 4.10570726  | 0.72566979  | -11.86539861 |
| C | 2.68128969  | 3.19282004  | -11.86544786 |
| C | 1.42440516  | 3.91848168  | -11.86539861 |
| C | -3.18151821 | 2.66334842  | -13.11621006 |
| C | -3.89729226 | 1.42358452  | -13.11621858 |
| C | -3.89728649 | -1.42360138 | -13.11621006 |
| C | -3.18150649 | -2.66336184 | -13.11621858 |
| C | -0.71576829 | -4.08694980 | -13.11621006 |
| C | 0.71578577  | -4.08694636 | -13.11621858 |
| C | 3.18151821  | -2.66334842 | -13.11621006 |

|   |             |             |              |
|---|-------------|-------------|--------------|
| C | 3.89729226  | -1.42358452 | -13.11621858 |
| C | 3.89728649  | 1.42360138  | -13.11621006 |
| C | 3.18150649  | 2.66336184  | -13.11621858 |
| C | 0.71576829  | 4.08694980  | -13.11621006 |
| C | -0.71578577 | 4.08694636  | -13.11621858 |
| C | -4.09674089 | 0.72555412  | -14.37878672 |
| C | -4.09674250 | -0.72556031 | -14.37883126 |
| C | -2.67671875 | -3.18510463 | -14.37878672 |
| C | -1.42001758 | -3.91066323 | -14.37883126 |
| C | 1.42002215  | -3.91065875 | -14.37878672 |
| C | 2.67672491  | -3.18510292 | -14.37883126 |
| C | 4.09674089  | -0.72555412 | -14.37878672 |
| C | 4.09674250  | 0.72556031  | -14.37883126 |
| C | 2.67671875  | 3.18510463  | -14.37878672 |
| C | 1.42001758  | 3.91066323  | -14.37883126 |
| C | -1.42002215 | 3.91065875  | -14.37878672 |
| C | -2.67672491 | 3.18510292  | -14.37883126 |
| C | -3.96642256 | -1.43868865 | -15.61863308 |
| C | -3.22915407 | -2.71567736 | -15.61864836 |
| C | -0.73727037 | -4.15436703 | -15.61863308 |
| C | 0.73726854  | -4.15436814 | -15.61864836 |
| C | 3.22915220  | -2.71567838 | -15.61863308 |
| C | 3.96642262  | -1.43869078 | -15.61864836 |
| C | 3.96642256  | 1.43868865  | -15.61863308 |
| C | 3.22915407  | 2.71567736  | -15.61864836 |
| C | 0.73727037  | 4.15436703  | -15.61863308 |
| C | -0.73726854 | 4.15436814  | -15.61864836 |
| C | -3.22915220 | 2.71567838  | -15.61863308 |
| C | -3.96642262 | 1.43869078  | -15.61864836 |
| C | -2.71597114 | -3.31736729 | -16.82909909 |
| C | -1.51494200 | -4.01078018 | -16.82910616 |
| C | 1.51493878  | -4.01078365 | -16.82909909 |
| C | 2.71596652  | -3.31736835 | -16.82910616 |
| C | 4.23090992  | -0.69341635 | -16.82909909 |
| C | 4.23090852  | 0.69341183  | -16.82910616 |
| C | 2.71597114  | 3.31736729  | -16.82909909 |
| C | 1.51494200  | 4.01078018  | -16.82910616 |
| C | -1.51493878 | 4.01078365  | -16.82909909 |
| C | -2.71596652 | 3.31736835  | -16.82910616 |
| C | -4.23090992 | 0.69341635  | -16.82909909 |
| C | -4.23090852 | -0.69341183 | -16.82910616 |
| H | -3.11551774 | 3.21626812  | 17.78506205  |
| H | -4.34315436 | 1.08996190  | 17.78503506  |
| H | -4.34312877 | -1.08998345 | 17.78506205  |
| H | -3.11551187 | -3.21630106 | 17.78503506  |
| H | -1.22761103 | -4.30625157 | 17.78506205  |
| H | 1.22764249  | -4.30626296 | 17.78503506  |
| H | 3.11551774  | -3.21626812 | 17.78506205  |
| H | 4.34315436  | -1.08996190 | 17.78503506  |
| H | 4.34312877  | 1.08998345  | 17.78506205  |
| H | 3.11551187  | 3.21630106  | 17.78503506  |
| H | 1.22761103  | 4.30625157  | 17.78506205  |
| H | -1.22764249 | 4.30626296  | 17.78503506  |
| H | -3.21630106 | -3.11551187 | -17.78503506 |
| H | -1.08998345 | -4.34312877 | -17.78506205 |
| H | 1.08996190  | -4.34315436 | -17.78503506 |
| H | 3.21626812  | -3.11551774 | -17.78506205 |
| H | 4.30626296  | -1.22764249 | -17.78503506 |
| H | 4.30625157  | 1.22761103  | -17.78506205 |
| H | 3.21630106  | 3.11551187  | -17.78503506 |
| H | 1.08998345  | 4.34312877  | -17.78506205 |
| H | -1.08996190 | 4.34315436  | -17.78503506 |
| H | -3.21626812 | 3.11551774  | -17.78506205 |
| H | -4.30626296 | 1.22764249  | -17.78503506 |
| H | -4.30625157 | -1.22761103 | -17.78506205 |

Nanotube (6,6) u14v6s  
B3LYP/STO-3G Energy: -13115.429629

|   |             |             |              |
|---|-------------|-------------|--------------|
| C | -3.46786555 | 2.48935689  | -17.47044737 |
| C | -2.48935689 | 3.46786555  | -17.47044737 |
| C | 0.42191353  | 4.24793810  | -17.47044737 |
| C | 1.75858122  | 3.88977908  | -17.47044737 |
| C | 3.88977908  | 1.75858122  | -17.47044737 |
| C | 4.24793810  | 0.42191353  | -17.47044737 |
| C | 3.46786555  | -2.48935689 | -17.47044737 |
| C | 2.48935689  | -3.46786555 | -17.47044737 |
| C | -0.42191353 | -4.24793810 | -17.47044737 |
| C | -1.75858122 | -3.88977908 | -17.47044737 |
| C | -3.88977908 | -1.75858122 | -17.47044737 |
| C | -4.24793810 | -0.42191353 | -17.47044737 |
| C | -1.78290703 | 3.81506159  | -16.25487185 |
| C | -0.36348802 | 4.19539377  | -16.25487185 |
| C | 2.41248674  | 3.45157357  | -16.25487185 |
| C | 3.45157357  | 2.41248674  | -16.25487185 |
| C | 4.19539377  | -0.36348802 | -16.25487185 |
| C | 3.81506159  | -1.78290703 | -16.25487185 |
| C | 1.78290703  | -3.81506159 | -16.25487185 |
| C | 0.36348802  | -4.19539377 | -16.25487185 |
| C | -2.41248674 | -3.45157357 | -16.25487185 |
| C | -3.45157357 | -2.41248674 | -16.25487185 |
| C | -4.19539377 | 0.36348802  | -16.25487185 |
| C | -3.81506159 | 1.78290703  | -16.25487185 |
| C | 0.35920410  | 4.14532470  | -15.01460971 |
| C | 1.76158247  | 3.76955855  | -15.01460971 |
| C | 3.76955855  | 1.76158247  | -15.01460971 |
| C | 4.14532470  | 0.35920410  | -15.01460971 |
| C | 3.41035445  | -2.38374223 | -15.01460971 |
| C | 2.38374223  | -3.41035445 | -15.01460971 |
| C | -0.35920410 | -4.14532470 | -15.01460971 |
| C | -1.76158247 | -3.76955855 | -15.01460971 |
| C | -3.76955855 | -1.76158247 | -15.01460971 |
| C | -4.14532470 | -0.35920410 | -15.01460971 |
| C | -3.41035445 | 2.38374223  | -15.01460971 |
| C | -2.38374223 | 3.41035445  | -15.01460971 |
| C | 2.38406653  | 3.39530146  | -13.75319570 |
| C | 3.39530146  | 2.38406653  | -13.75319570 |
| C | 4.13245058  | -0.36701145 | -13.75319570 |
| C | 3.76231291  | -1.74838405 | -13.75319570 |
| C | 1.74838405  | -3.76231291 | -13.75319570 |
| C | 0.36701145  | -4.13245058 | -13.75319570 |
| C | -2.38406653 | -3.39530146 | -13.75319570 |
| C | -3.39530146 | -2.38406653 | -13.75319570 |
| C | -4.13245058 | 0.36701145  | -13.75319570 |
| C | -3.76231291 | 1.74838405  | -13.75319570 |
| C | -1.74838405 | 3.76231291  | -13.75319570 |
| C | -0.36701145 | 4.13245058  | -13.75319570 |
| C | 3.77554121  | 1.76097476  | -12.49928333 |
| C | 4.15020199  | 0.36272173  | -12.49928333 |
| C | 3.41281949  | -2.38922722 | -12.49928333 |
| C | 2.38922722  | -3.41281949 | -12.49928333 |
| C | -0.36272173 | -4.15020199 | -12.49928333 |
| C | -1.76097476 | -3.77554121 | -12.49928333 |
| C | -3.77554121 | -1.76097476 | -12.49928333 |
| C | -4.15020199 | -0.36272173 | -12.49928333 |
| C | -3.41281949 | 2.38922722  | -12.49928333 |
| C | -2.38922722 | 3.41281949  | -12.49928333 |
| C | 0.36272173  | 4.15020199  | -12.49928333 |
| C | 1.76097476  | 3.77554121  | -12.49928333 |
| C | 4.15592141  | -0.36304631 | -11.25582348 |
| C | 3.78065667  | -1.76355338 | -11.25582348 |
| C | 1.76355338  | -3.78065667 | -11.25582348 |
| C | 0.36304631  | -4.15592141 | -11.25582348 |
| C | -2.39236803 | -3.41761036 | -11.25582348 |
| C | -3.41761036 | -2.39236803 | -11.25582348 |
| C | -4.15592141 | 0.36304631  | -11.25582348 |
| C | -3.78065667 | 1.76355338  | -11.25582348 |
| C | -1.76355338 | 3.78065667  | -11.25582348 |

|   |             |             |              |
|---|-------------|-------------|--------------|
| C | -0.36304631 | 4.15592141  | -11.25582348 |
| C | 2.39236803  | 3.41761036  | -11.25582348 |
| C | 3.41761036  | 2.39236803  | -11.25582348 |
| C | 3.40955834  | -2.39264334 | -10.00307416 |
| C | 2.39264334  | -3.40955834 | -10.00307416 |
| C | -0.36731075 | -4.14908581 | -10.00307416 |
| C | -1.75644246 | -3.77686908 | -10.00307416 |
| C | -3.77686908 | -1.75644246 | -10.00307416 |
| C | -4.14908581 | -0.36731075 | -10.00307416 |
| C | -3.40955834 | 2.39264334  | -10.00307416 |
| C | -2.39264334 | 3.40955834  | -10.00307416 |
| C | 0.36731075  | 4.14908581  | -10.00307416 |
| C | 1.75644246  | 3.77686908  | -10.00307416 |
| C | 3.77686908  | 1.75644246  | -10.00307416 |
| C | 4.14908581  | 0.36731075  | -10.00307416 |
| C | 1.76180571  | -3.78098432 | -8.74869649  |
| C | 0.36472366  | -4.15533133 | -8.74869649  |
| C | -2.39352562 | -3.41626066 | -8.74869649  |
| C | -3.41626066 | -2.39352562 | -8.74869649  |
| C | -4.15533133 | 0.36472366  | -8.74869649  |
| C | -3.78098432 | 1.76180571  | -8.74869649  |
| C | -1.76180571 | 3.78098432  | -8.74869649  |
| C | -0.36472366 | 4.15533133  | -8.74869649  |
| C | 2.39352562  | 3.41626066  | -8.74869649  |
| C | 3.41626066  | 2.39352562  | -8.74869649  |
| C | 4.15533133  | -0.36472366 | -8.74869649  |
| C | 3.78098432  | -1.76180571 | -8.74869649  |
| C | -0.36332118 | -4.15880066 | -7.50347016  |
| C | -1.76475496 | -3.78328761 | -7.50347016  |
| C | -3.78328761 | -1.76475496 | -7.50347016  |
| C | -4.15880066 | -0.36332118 | -7.50347016  |
| C | -3.41996643 | 2.39404570  | -7.50347016  |
| C | -2.39404570 | 3.41996643  | -7.50347016  |
| C | 0.36332118  | 4.15880066  | -7.50347016  |
| C | 1.76475496  | 3.78328761  | -7.50347016  |
| C | 3.78328761  | 1.76475496  | -7.50347016  |
| C | 4.15880066  | 0.36332118  | -7.50347016  |
| C | 3.41996643  | -2.39404570 | -7.50347016  |
| C | 2.39404570  | -3.41996643 | -7.50347016  |
| C | -2.39259806 | -3.41105627 | -6.25305473  |
| C | -3.41105627 | -2.39259806 | -6.25305473  |
| C | -4.15036041 | 0.36652256  | -6.25305473  |
| C | -3.77757883 | 1.75776236  | -6.25305473  |
| C | -1.75776236 | 3.77757883  | -6.25305473  |
| C | -0.36652256 | 4.15036041  | -6.25305473  |
| C | 2.39259806  | 3.41105627  | -6.25305473  |
| C | 3.41105627  | 2.39259806  | -6.25305473  |
| C | 4.15036041  | -0.36652256 | -6.25305473  |
| C | 3.77757883  | -1.75776236 | -6.25305473  |
| C | 1.75776236  | -3.77757883 | -6.25305473  |
| C | 0.36652256  | -4.15036041 | -6.25305473  |
| C | -3.77841511 | -1.75999853 | -4.99810465  |
| C | -4.15220273 | -0.36500411 | -4.99810465  |
| C | -3.41341099 | 2.39220420  | -4.99810465  |
| C | -2.39220420 | 3.41341099  | -4.99810465  |
| C | 0.36500411  | 4.15220273  | -4.99810465  |
| C | 1.75999853  | 3.77841511  | -4.99810465  |
| C | 3.77841511  | 1.75999853  | -4.99810465  |
| C | 4.15220273  | 0.36500411  | -4.99810465  |
| C | 3.41341099  | -2.39220420 | -4.99810465  |
| C | 2.39220420  | -3.41341099 | -4.99810465  |
| C | -0.36500411 | -4.15220273 | -4.99810465  |
| C | -1.75999853 | -3.77841511 | -4.99810465  |
| C | -4.15696388 | 0.36304717  | -3.75123905  |
| C | -3.78155990 | 1.76407387  | -3.75123905  |
| C | -1.76407387 | 3.78155990  | -3.75123905  |
| C | -0.36304717 | 4.15696388  | -3.75123905  |
| C | 2.39289001  | 3.41851274  | -3.75123905  |
| C | 3.41851274  | 2.39289001  | -3.75123905  |
| C | 4.15696388  | -0.36304717 | -3.75123905  |

|   |             |             |             |
|---|-------------|-------------|-------------|
| C | 3.78155990  | -1.76407387 | -3.75123905 |
| C | 1.76407387  | -3.78155990 | -3.75123905 |
| C | 0.36304717  | -4.15696388 | -3.75123905 |
| C | -2.39289001 | -3.41851274 | -3.75123905 |
| C | -3.41851274 | -2.39289001 | -3.75123905 |
| C | -3.41188865 | 2.39257288  | -2.50227652 |
| C | -2.39257288 | 3.41188865  | -2.50227652 |
| C | 0.36608457  | 4.15106869  | -2.50227652 |
| C | 1.75849580  | 3.77797322  | -2.50227652 |
| C | 3.77797322  | 1.75849580  | -2.50227652 |
| C | 4.15106869  | 0.36608457  | -2.50227652 |
| C | 3.41188865  | -2.39257288 | -2.50227652 |
| C | 2.39257288  | -3.41188865 | -2.50227652 |
| C | -0.36608457 | -4.15106869 | -2.50227652 |
| C | -1.75849580 | -3.77797322 | -2.50227652 |
| C | -3.77797322 | -1.75849580 | -2.50227652 |
| C | -4.15106869 | -0.36608457 | -2.50227652 |
| C | -1.75925738 | 3.77835691  | -1.24761042 |
| C | -0.36561688 | 4.15178176  | -1.24761042 |
| C | 2.39252438  | 3.41274004  | -1.24761042 |
| C | 3.41274004  | 2.39252438  | -1.24761042 |
| C | 4.15178176  | -0.36561688 | -1.24761042 |
| C | 3.77835691  | -1.75925738 | -1.24761042 |
| C | 1.75925738  | -3.77835691 | -1.24761042 |
| C | 0.36561688  | -4.15178176 | -1.24761042 |
| C | -2.39252438 | -3.41274004 | -1.24761042 |
| C | -3.41274004 | -2.39252438 | -1.24761042 |
| C | -4.15178176 | 0.36561688  | -1.24761042 |
| C | -3.77835691 | 1.75925738  | -1.24761042 |
| C | 0.36311470  | 4.15697655  | 0.00000000  |
| C | 1.76402173  | 3.78160465  | 0.00000000  |
| C | 3.78160465  | 1.76402173  | 0.00000000  |
| C | 4.15697655  | 0.36311470  | 0.00000000  |
| C | 3.41848995  | -2.39295483 | 0.00000000  |
| C | 2.39295483  | -3.41848995 | 0.00000000  |
| C | -0.36311470 | -4.15697655 | 0.00000000  |
| C | -1.76402173 | -3.78160465 | 0.00000000  |
| C | -3.78160465 | -1.76402173 | 0.00000000  |
| C | -4.15697655 | -0.36311470 | 0.00000000  |
| C | -3.41848995 | 2.39295483  | 0.00000000  |
| C | -2.39295483 | 3.41848995  | 0.00000000  |
| C | 2.39252438  | 3.41274004  | 1.24761042  |
| C | 3.41274004  | 2.39252438  | 1.24761042  |
| C | 4.15178176  | -0.36561688 | 1.24761042  |
| C | 3.77835691  | -1.75925738 | 1.24761042  |
| C | 1.75925738  | -3.77835691 | 1.24761042  |
| C | 0.36561688  | -4.15178176 | 1.24761042  |
| C | -2.39252438 | -3.41274004 | 1.24761042  |
| C | -3.41274004 | -2.39252438 | 1.24761042  |
| C | -4.15178176 | 0.36561688  | 1.24761042  |
| C | -3.77835691 | 1.75925738  | 1.24761042  |
| C | -1.75925738 | 3.77835691  | 1.24761042  |
| C | -0.36561688 | 4.15178176  | 1.24761042  |
| C | 3.77797322  | 1.75849580  | 2.50227652  |
| C | 4.15106869  | 0.36608457  | 2.50227652  |
| C | 3.41188865  | -2.39257288 | 2.50227652  |
| C | 2.39257288  | -3.41188865 | 2.50227652  |
| C | -0.36608457 | -4.15106869 | 2.50227652  |
| C | -1.75849580 | -3.77797322 | 2.50227652  |
| C | -3.77797322 | -1.75849580 | 2.50227652  |
| C | -4.15106869 | -0.36608457 | 2.50227652  |
| C | -3.41188865 | 2.39257288  | 2.50227652  |
| C | -2.39257288 | 3.41188865  | 2.50227652  |
| C | 0.36608457  | 4.15106869  | 2.50227652  |
| C | 1.75849580  | 3.77797322  | 2.50227652  |
| C | 4.15696388  | -0.36304717 | 3.75123905  |
| C | 3.78155990  | -1.76407387 | 3.75123905  |
| C | 1.76407387  | -3.78155990 | 3.75123905  |
| C | 0.36304717  | -4.15696388 | 3.75123905  |
| C | -2.39289001 | -3.41851274 | 3.75123905  |

|   |             |             |             |
|---|-------------|-------------|-------------|
| C | -3.41851274 | -2.39289001 | 3.75123905  |
| C | -4.15696388 | 0.36304717  | 3.75123905  |
| C | -3.78155990 | 1.76407387  | 3.75123905  |
| C | -1.76407387 | 3.78155990  | 3.75123905  |
| C | -0.36304717 | 4.15696388  | 3.75123905  |
| C | 2.39289001  | 3.41851274  | 3.75123905  |
| C | 3.41851274  | 2.39289001  | 3.75123905  |
| C | 3.41341099  | -2.39220420 | 4.99810465  |
| C | 2.39220420  | -3.41341099 | 4.99810465  |
| C | -0.36500411 | -4.15220273 | 4.99810465  |
| C | -1.75999853 | -3.77841511 | 4.99810465  |
| C | -3.77841511 | -1.75999853 | 4.99810465  |
| C | -4.15220273 | -0.36500411 | 4.99810465  |
| C | -3.41341099 | 2.39220420  | 4.99810465  |
| C | -2.39220420 | 3.41341099  | 4.99810465  |
| C | 0.36500411  | 4.15220273  | 4.99810465  |
| C | 1.75999853  | 3.77841511  | 4.99810465  |
| C | 3.77841511  | 1.75999853  | 4.99810465  |
| C | 4.15220273  | 0.36500411  | 4.99810465  |
| C | 1.75776236  | -3.77757883 | 6.25305473  |
| C | 0.36652256  | -4.15036041 | 6.25305473  |
| C | -2.39259806 | -3.41105627 | 6.25305473  |
| C | -3.41105627 | -2.39259806 | 6.25305473  |
| C | -4.15036041 | 0.36652256  | 6.25305473  |
| C | -3.77757883 | 1.75776236  | 6.25305473  |
| C | -1.75776236 | 3.77757883  | 6.25305473  |
| C | -0.36652256 | 4.15036041  | 6.25305473  |
| C | 2.39259806  | 3.41105627  | 6.25305473  |
| C | 3.41105627  | 2.39259806  | 6.25305473  |
| C | 4.15036041  | -0.36652256 | 6.25305473  |
| C | 3.77757883  | -1.75776236 | 6.25305473  |
| C | -0.36332118 | -4.15880066 | 7.50347016  |
| C | -1.76475496 | -3.78328761 | 7.50347016  |
| C | -3.78328761 | -1.76475496 | 7.50347016  |
| C | -4.15880066 | -0.36332118 | 7.50347016  |
| C | -3.41996643 | 2.39404570  | 7.50347016  |
| C | -2.39404570 | 3.41996643  | 7.50347016  |
| C | 0.36332118  | 4.15880066  | 7.50347016  |
| C | 1.76475496  | 3.78328761  | 7.50347016  |
| C | 3.78328761  | 1.76475496  | 7.50347016  |
| C | 4.15880066  | 0.36332118  | 7.50347016  |
| C | 3.41996643  | -2.39404570 | 7.50347016  |
| C | 2.39404570  | -3.41996643 | 7.50347016  |
| C | -2.39352562 | -3.41626066 | 8.74869649  |
| C | -3.41626066 | -2.39352562 | 8.74869649  |
| C | -4.15533133 | 0.36472366  | 8.74869649  |
| C | -3.78098432 | 1.76180571  | 8.74869649  |
| C | -1.76180571 | 3.78098432  | 8.74869649  |
| C | -0.36472366 | 4.15533133  | 8.74869649  |
| C | 2.39352562  | 3.41626066  | 8.74869649  |
| C | 3.41626066  | 2.39352562  | 8.74869649  |
| C | 4.15533133  | -0.36472366 | 8.74869649  |
| C | 3.78098432  | -1.76180571 | 8.74869649  |
| C | 1.76180571  | -3.78098432 | 8.74869649  |
| C | 0.36472366  | -4.15533133 | 8.74869649  |
| C | -3.77686908 | -1.75644246 | 10.00307416 |
| C | -4.14908581 | -0.36731075 | 10.00307416 |
| C | -3.40955834 | 2.39264334  | 10.00307416 |
| C | -2.39264334 | 3.40955834  | 10.00307416 |
| C | 0.36731075  | 4.14908581  | 10.00307416 |
| C | 1.75644246  | 3.77686908  | 10.00307416 |
| C | 3.77686908  | 1.75644246  | 10.00307416 |
| C | 4.14908581  | 0.36731075  | 10.00307416 |
| C | 3.40955834  | -2.39264334 | 10.00307416 |
| C | 2.39264334  | -3.40955834 | 10.00307416 |
| C | -0.36731075 | -4.14908581 | 10.00307416 |
| C | -1.75644246 | -3.77686908 | 10.00307416 |
| C | -4.15592141 | 0.36304631  | 11.25582348 |
| C | -3.78065667 | 1.76355338  | 11.25582348 |
| C | -1.76355338 | 3.78065667  | 11.25582348 |

|   |             |             |              |
|---|-------------|-------------|--------------|
| C | -0.36304631 | 4.15592141  | 11.25582348  |
| C | 2.39236803  | 3.41761036  | 11.25582348  |
| C | 3.41761036  | 2.39236803  | 11.25582348  |
| C | 4.15592141  | -0.36304631 | 11.25582348  |
| C | 3.78065667  | -1.76355338 | 11.25582348  |
| C | 1.76355338  | -3.78065667 | 11.25582348  |
| C | 0.36304631  | -4.15592141 | 11.25582348  |
| C | -2.39236803 | -3.41761036 | 11.25582348  |
| C | -3.41761036 | -2.39236803 | 11.25582348  |
| C | -3.41281949 | 2.38922722  | 12.49928333  |
| C | -2.38922722 | 3.41281949  | 12.49928333  |
| C | 0.36272173  | 4.15020199  | 12.49928333  |
| C | 1.76097476  | 3.77554121  | 12.49928333  |
| C | 3.77554121  | 1.76097476  | 12.49928333  |
| C | 4.15020199  | 0.36272173  | 12.49928333  |
| C | 3.41281949  | -2.38922722 | 12.49928333  |
| C | 2.38922722  | -3.41281949 | 12.49928333  |
| C | -0.36272173 | -4.15020199 | 12.49928333  |
| C | -1.76097476 | -3.77554121 | 12.49928333  |
| C | -3.77554121 | -1.76097476 | 12.49928333  |
| C | -4.15020199 | -0.36272173 | 12.49928333  |
| C | -1.74838405 | 3.76231291  | 13.75319570  |
| C | -0.36701145 | 4.13245058  | 13.75319570  |
| C | 2.38406653  | 3.39530146  | 13.75319570  |
| C | 3.39530146  | 2.38406653  | 13.75319570  |
| C | 4.13245058  | -0.36701145 | 13.75319570  |
| C | 3.76231291  | -1.74838405 | 13.75319570  |
| C | 1.74838405  | -3.76231291 | 13.75319570  |
| C | 0.36701145  | -4.13245058 | 13.75319570  |
| C | -2.38406653 | -3.39530146 | 13.75319570  |
| C | -3.39530146 | -2.38406653 | 13.75319570  |
| C | -4.13245058 | 0.36701145  | 13.75319570  |
| C | -3.76231291 | 1.74838405  | 13.75319570  |
| C | 0.35920410  | 4.14532470  | 15.01460971  |
| C | 1.76158247  | 3.76955855  | 15.01460971  |
| C | 3.76955855  | 1.76158247  | 15.01460971  |
| C | 4.14532470  | 0.35920410  | 15.01460971  |
| C | 3.41035445  | -2.38374223 | 15.01460971  |
| C | 2.38374223  | -3.41035445 | 15.01460971  |
| C | -0.35920410 | -4.14532470 | 15.01460971  |
| C | -1.76158247 | -3.76955855 | 15.01460971  |
| C | -3.76955855 | -1.76158247 | 15.01460971  |
| C | -4.14532470 | -0.35920410 | 15.01460971  |
| C | -3.41035445 | 2.38374223  | 15.01460971  |
| C | -2.38374223 | 3.41035445  | 15.01460971  |
| C | 2.41248674  | 3.45157357  | 16.25487185  |
| C | 3.45157357  | 2.41248674  | 16.25487185  |
| C | 4.19539377  | -0.36348802 | 16.25487185  |
| C | 3.81506159  | -1.78290703 | 16.25487185  |
| C | 1.78290703  | -3.81506159 | 16.25487185  |
| C | 0.36348802  | -4.19539377 | 16.25487185  |
| C | -2.41248674 | -3.45157357 | 16.25487185  |
| C | -3.45157357 | -2.41248674 | 16.25487185  |
| C | -4.19539377 | 0.36348802  | 16.25487185  |
| C | -3.81506159 | 1.78290703  | 16.25487185  |
| C | -1.78290703 | 3.81506159  | 16.25487185  |
| C | -0.36348802 | 4.19539377  | 16.25487185  |
| C | 3.88977908  | 1.75858122  | 17.47044737  |
| C | 4.24793810  | 0.42191353  | 17.47044737  |
| C | 3.46786555  | -2.48935689 | 17.47044737  |
| C | 2.48935689  | -3.46786555 | 17.47044737  |
| C | -0.42191353 | -4.24793810 | 17.47044737  |
| C | -1.75858122 | -3.88977908 | 17.47044737  |
| C | -3.88977908 | -1.75858122 | 17.47044737  |
| C | -4.24793810 | -0.42191353 | 17.47044737  |
| C | -3.46786555 | 2.48935689  | 17.47044737  |
| C | -2.48935689 | 3.46786555  | 17.47044737  |
| C | 0.42191353  | 4.24793810  | 17.47044737  |
| C | 1.75858122  | 3.88977908  | 17.47044737  |
| H | -3.89251063 | 2.15675723  | -18.42635300 |



|   |             |             |              |
|---|-------------|-------------|--------------|
| H | -2.15675723 | 3.89251063  | -18.42635300 |
| H | -0.07844876 | 4.44939171  | -18.42635300 |
| H | 2.29263447  | 3.81406187  | -18.42635300 |
| H | 3.81406187  | 2.29263447  | -18.42635300 |
| H | 4.44939171  | -0.07844876 | -18.42635300 |
| H | 3.89251063  | -2.15675723 | -18.42635300 |
| H | 2.15675723  | -3.89251063 | -18.42635300 |
| H | 0.07844876  | -4.44939171 | -18.42635300 |
| H | -2.29263447 | -3.81406187 | -18.42635300 |
| H | -3.81406187 | -2.29263447 | -18.42635300 |
| H | -4.44939171 | 0.07844876  | -18.42635300 |
| H | 3.81406187  | 2.29263447  | 18.42635300  |
| H | 4.44939171  | -0.07844876 | 18.42635300  |
| H | 3.89251063  | -2.15675723 | 18.42635300  |
| H | 2.15675723  | -3.89251063 | 18.42635300  |
| H | 0.07844876  | -4.44939171 | 18.42635300  |
| H | -2.29263447 | -3.81406187 | 18.42635300  |
| H | -3.81406187 | -2.29263447 | 18.42635300  |
| H | -4.44939171 | 0.07844876  | 18.42635300  |
| H | -3.89251063 | 2.15675723  | 18.42635300  |
| H | -2.15675723 | 3.89251063  | 18.42635300  |
| H | -0.07844876 | 4.44939171  | 18.42635300  |
| H | 2.29263447  | 3.81406187  | 18.42635300  |

Nanotube (6,6) u15v0s  
B3LYP/STO-3G Energy: -13567.200571

|   |             |             |              |
|---|-------------|-------------|--------------|
| C | -3.99186291 | 1.50698602  | -18.10385867 |
| C | -3.30102055 | 2.70356147  | -18.10385241 |
| C | -0.69084327 | 4.21054770  | -18.10385867 |
| C | 0.69084263  | 4.21054839  | -18.10385241 |
| C | 3.30101963  | 2.70356167  | -18.10385867 |
| C | 3.99186319  | 1.50698692  | -18.10385241 |
| C | 3.99186291  | -1.50698602 | -18.10385867 |
| C | 3.30102055  | -2.70356147 | -18.10385241 |
| C | 0.69084327  | -4.21054770 | -18.10385867 |
| C | -0.69084263 | -4.21054839 | -18.10385241 |
| C | -3.30101963 | -2.70356167 | -18.10385867 |
| C | -3.99186319 | -1.50698692 | -18.10385241 |
| C | -2.70637466 | 3.22191341  | -16.88615784 |
| C | -1.43707058 | 3.95474616  | -16.88615253 |
| C | 1.43707153  | 3.95474592  | -16.88615784 |
| C | 2.70637535  | 3.22191272  | -16.88615253 |
| C | 4.14344620  | 0.73283250  | -16.88615784 |
| C | 4.14344594  | -0.73283345 | -16.88615253 |
| C | 2.70637466  | -3.22191341 | -16.88615784 |
| C | 1.43707058  | -3.95474616 | -16.88615253 |
| C | -1.43707153 | -3.95474592 | -16.88615784 |
| C | -2.70637535 | -3.22191272 | -16.88615253 |
| C | -4.14344620 | -0.73283250 | -16.88615784 |
| C | -4.14344594 | 0.73283345  | -16.88615253 |
| C | -0.72639280 | 4.09755982  | -15.64536215 |
| C | 0.72639553  | 4.09755887  | -15.64535348 |
| C | 3.18539450  | 2.67785453  | -15.64536215 |
| C | 3.91178784  | 1.41970246  | -15.64535348 |
| C | 3.91178730  | -1.41970530 | -15.64536215 |
| C | 3.18539231  | -2.67785641 | -15.64535348 |
| C | 0.72639280  | -4.09755982 | -15.64536215 |
| C | -0.72639553 | -4.09755887 | -15.64535348 |
| C | -3.18539450 | -2.67785453 | -15.64536215 |
| C | -3.91178784 | -1.41970246 | -15.64535348 |
| C | -3.91178730 | 1.41970530  | -15.64536215 |
| C | -3.18539231 | 2.67785641  | -15.64535348 |
| C | 1.42407422  | 3.89581703  | -14.38561005 |
| C | 2.66184245  | 3.18119146  | -14.38558877 |
| C | 4.08591363  | 0.71462406  | -14.38561005 |
| C | 4.08591384  | -0.71462745 | -14.38558877 |
| C | 2.66183941  | -3.18119297 | -14.38561005 |

|   |             |             |              |
|---|-------------|-------------|--------------|
| C | 1.42407139  | -3.89581891 | -14.38558877 |
| C | -1.42407422 | -3.89581703 | -14.38561005 |
| C | -2.66184245 | -3.18119146 | -14.38558877 |
| C | -4.08591363 | -0.71462406 | -14.38561005 |
| C | -4.08591384 | 0.71462745  | -14.38558877 |
| C | -2.66183941 | 3.18119297  | -14.38561005 |
| C | -1.42407139 | 3.89581891  | -14.38558877 |
| C | 3.18976163  | 2.67497491  | -13.12968709 |
| C | 3.91147919  | 1.42492317  | -13.12964718 |
| C | 3.91147704  | -1.42492715 | -13.12968709 |
| C | 3.18975926  | -2.67497876 | -13.12964718 |
| C | 0.72171542  | -4.09990206 | -13.12968709 |
| C | -0.72171993 | -4.09990193 | -13.12964718 |
| C | -3.18976163 | -2.67497491 | -13.12968709 |
| C | -3.91147919 | -1.42492317 | -13.12964718 |
| C | -3.91147704 | 1.42492715  | -13.12968709 |
| C | -3.18975926 | 2.67497876  | -13.12964718 |
| C | -0.72171542 | 4.09990206  | -13.12968709 |
| C | 0.72171993  | 4.09990193  | -13.12964718 |
| C | 4.10832071  | 0.72524736  | -11.88506609 |
| C | 4.10831952  | -0.72524975 | -11.88501619 |
| C | 2.68224299  | -3.19528642 | -11.88506609 |
| C | 1.42607505  | -3.92053394 | -11.88501619 |
| C | -1.42607772 | -3.92053378 | -11.88506609 |
| C | -2.68224447 | -3.19528419 | -11.88501619 |
| C | -4.10832071 | -0.72524736 | -11.88506609 |
| C | -4.10831952 | 0.72524975  | -11.88501619 |
| C | -2.68224299 | 3.19528642  | -11.88506609 |
| C | -1.42607505 | 3.92053394  | -11.88501619 |
| C | 1.42607772  | 3.92053378  | -11.88506609 |
| C | 2.68224447  | 3.19528419  | -11.88501619 |
| C | 3.91238618  | -1.42839586 | -10.63442015 |
| C | 3.19322143  | -2.67402679 | -10.63438125 |
| C | 0.71916599  | -4.10242375 | -10.63442015 |
| C | -0.71916442 | -4.10242427 | -10.63438125 |
| C | -3.19322019 | -2.67402789 | -10.63442015 |
| C | -3.91238584 | -1.42839748 | -10.63438125 |
| C | -3.91238618 | 1.42839586  | -10.63442015 |
| C | -3.19322143 | 2.67402679  | -10.63438125 |
| C | -0.71916599 | 4.10242375  | -10.63442015 |
| C | 0.71916442  | 4.10242427  | -10.63438125 |
| C | 3.19322019  | 2.67402789  | -10.63442015 |
| C | 3.91238584  | 1.42839748  | -10.63438125 |
| C | 2.67657225  | -3.19437525 | -9.37855106  |
| C | 1.42812569  | -3.91516632 | -9.37853904  |
| C | -1.42812399 | -3.91516719 | -9.37855106  |
| C | -2.67657065 | -3.19437629 | -9.37853904  |
| C | -4.10469625 | -0.72079194 | -9.37855106  |
| C | -4.10469634 | 0.72079003  | -9.37853904  |
| C | -2.67657225 | 3.19437525  | -9.37855106  |
| C | -1.42812569 | 3.91516632  | -9.37853904  |
| C | 1.42812399  | 3.91516719  | -9.37855106  |
| C | 2.67657065  | 3.19437629  | -9.37853904  |
| C | 4.10469625  | 0.72079194  | -9.37855106  |
| C | 4.10469634  | -0.72079003 | -9.37853904  |
| C | 0.72522719  | -4.11033709 | -8.13076800  |
| C | -0.72522646 | -4.11033669 | -8.13078511  |
| C | -3.19704274 | -2.68323372 | -8.13076800  |
| C | -3.92226922 | -1.42710381 | -8.13078511  |
| C | -3.92226994 | 1.42710337  | -8.13076800  |
| C | -3.19704276 | 2.68323288  | -8.13078511  |
| C | -0.72522719 | 4.11033709  | -8.13076800  |
| C | 0.72522646  | 4.11033669  | -8.13078511  |
| C | 3.19704274  | 2.68323372  | -8.13076800  |
| C | 3.92226922  | 1.42710381  | -8.13078511  |
| C | 3.92226994  | -1.42710337 | -8.13076800  |
| C | 3.19704276  | -2.68323288 | -8.13078511  |
| C | -1.42780604 | -3.91485637 | -6.88273242  |
| C | -2.67646413 | -3.19394389 | -6.88276265  |
| C | -4.10426808 | -0.72091188 | -6.88273242  |

|   |             |             |             |
|---|-------------|-------------|-------------|
| C | -4.10426861 | 0.72091398  | -6.88276265 |
| C | -2.67646205 | 3.19394448  | -6.88273242 |
| C | -1.42780448 | 3.91485787  | -6.88276265 |
| C | 1.42780604  | 3.91485637  | -6.88273242 |
| C | 2.67646413  | 3.19394389  | -6.88276265 |
| C | 4.10426808  | 0.72091188  | -6.88273242 |
| C | 4.10426861  | -0.72091398 | -6.88276265 |
| C | 2.67646205  | -3.19394448 | -6.88273242 |
| C | 1.42780448  | -3.91485787 | -6.88276265 |
| C | -3.19238339 | -2.67406041 | -5.62710596 |
| C | -3.91199755 | -1.42765202 | -5.62712912 |
| C | -3.91199594 | 1.42765491  | -5.62710596 |
| C | -3.19238169 | 2.67406325  | -5.62712912 |
| C | -0.71961255 | 4.10171532  | -5.62710596 |
| C | 0.71961586  | 4.10171527  | -5.62712912 |
| C | 3.19238339  | 2.67406041  | -5.62710596 |
| C | 3.91199755  | 1.42765202  | -5.62712912 |
| C | 3.91199594  | -1.42765491 | -5.62710596 |
| C | 3.19238169  | -2.67406325 | -5.62712912 |
| C | 0.71961255  | -4.10171532 | -5.62710596 |
| C | -0.71961586 | -4.10171527 | -5.62712912 |
| C | -4.10741591 | -0.72429520 | -4.37658025 |
| C | -4.10741475 | 0.72430074  | -4.37658434 |
| C | -2.68096600 | 3.19497892  | -4.37658025 |
| C | -1.42644454 | 3.91927588  | -4.37658434 |
| C | 1.42644991  | 3.91927412  | -4.37658025 |
| C | 2.68097021  | 3.19497515  | -4.37658434 |
| C | 4.10741591  | 0.72429520  | -4.37658025 |
| C | 4.10741475  | -0.72430074 | -4.37658434 |
| C | 2.68096600  | -3.19497892 | -4.37658025 |
| C | 1.42644454  | -3.91927588 | -4.37658434 |
| C | -1.42644991 | -3.91927412 | -4.37658025 |
| C | -2.68097021 | -3.19497515 | -4.37658434 |
| C | -3.91638307 | 1.42717209  | -3.12970444 |
| C | -3.19415800 | 2.67810353  | -3.12968888 |
| C | -0.72222425 | 4.10527328  | -3.12970444 |
| C | 0.72222669  | 4.10527374  | -3.12968888 |
| C | 3.19415882  | 2.67810119  | -3.12970444 |
| C | 3.91638470  | 1.42717021  | -3.12968888 |
| C | 3.91638307  | -1.42717209 | -3.12970444 |
| C | 3.19415800  | -2.67810353 | -3.12968888 |
| C | 0.72222425  | -4.10527328 | -3.12970444 |
| C | -0.72222669 | -4.10527374 | -3.12968888 |
| C | -3.19415882 | -2.67810119 | -3.12970444 |
| C | -3.91638470 | -1.42717021 | -3.12968888 |
| C | -2.67363211 | 3.19244626  | -1.87560258 |
| C | -1.42792188 | 3.91165732  | -1.87557510 |
| C | 1.42792350  | 3.91165646  | -1.87560258 |
| C | 2.67363367  | 3.19244528  | -1.87557510 |
| C | 4.10155561  | 0.71921020  | -1.87560258 |
| C | 4.10155555  | -0.71921204 | -1.87557510 |
| C | 2.67363211  | -3.19244626 | -1.87560258 |
| C | 1.42792188  | -3.91165732 | -1.87557510 |
| C | -1.42792350 | -3.91165646 | -1.87560258 |
| C | -2.67363367 | -3.19244528 | -1.87557510 |
| C | -4.10155561 | -0.71921020 | -1.87560258 |
| C | -4.10155555 | 0.71921204  | -1.87557510 |
| C | -0.72331653 | 4.10617884  | -0.62323548 |
| C | 0.72331746  | 4.10617822  | -0.62320377 |
| C | 3.19439692  | 2.67949991  | -0.62323548 |
| C | 3.91771338  | 1.42667782  | -0.62320377 |
| C | 3.91771345  | -1.42667893 | -0.62323548 |
| C | 3.19439592  | -2.67950041 | -0.62320377 |
| C | 0.72331653  | -4.10617884 | -0.62323548 |
| C | -0.72331746 | -4.10617822 | -0.62320377 |
| C | -3.19439692 | -2.67949991 | -0.62323548 |
| C | -3.91771338 | -1.42667782 | -0.62320377 |
| C | -3.91771345 | 1.42667893  | -0.62323548 |
| C | -3.19439592 | 2.67950041  | -0.62320377 |
| C | 1.42667782  | 3.91771338  | 0.62320377  |

|   |             |             |            |
|---|-------------|-------------|------------|
| C | 2.67949991  | 3.19439692  | 0.62323548 |
| C | 4.10617822  | 0.72331746  | 0.62320377 |
| C | 4.10617884  | -0.72331653 | 0.62323548 |
| C | 2.67950041  | -3.19439592 | 0.62320377 |
| C | 1.42667893  | -3.91771345 | 0.62323548 |
| C | -1.42667782 | -3.91771338 | 0.62320377 |
| C | -2.67949991 | -3.19439692 | 0.62323548 |
| C | -4.10617822 | -0.72331746 | 0.62320377 |
| C | -4.10617884 | 0.72331653  | 0.62323548 |
| C | -2.67950041 | 3.19439592  | 0.62320377 |
| C | -1.42667893 | 3.91771345  | 0.62323548 |
| C | 3.19244528  | 2.67363367  | 1.87557510 |
| C | 3.91165646  | 1.42792350  | 1.87560258 |
| C | 3.91165732  | -1.42792188 | 1.87557510 |
| C | 3.19244626  | -2.67363211 | 1.87560258 |
| C | 0.71921204  | -4.10155555 | 1.87557510 |
| C | -0.71921020 | -4.10155561 | 1.87560258 |
| C | -3.19244528 | -2.67363367 | 1.87557510 |
| C | -3.91165646 | -1.42792350 | 1.87560258 |
| C | -3.91165732 | 1.42792188  | 1.87557510 |
| C | -3.19244626 | 2.67363211  | 1.87560258 |
| C | -0.71921204 | 4.10155555  | 1.87557510 |
| C | 0.71921020  | 4.10155561  | 1.87560258 |
| C | 4.10527374  | 0.72222669  | 3.12968888 |
| C | 4.10527328  | -0.72222425 | 3.12970444 |
| C | 2.67810353  | -3.19415800 | 3.12968888 |
| C | 1.42717209  | -3.91638307 | 3.12970444 |
| C | -1.42717021 | -3.91638470 | 3.12968888 |
| C | -2.67810119 | -3.19415882 | 3.12970444 |
| C | -4.10527374 | -0.72222669 | 3.12968888 |
| C | -4.10527328 | 0.72222425  | 3.12970444 |
| C | -2.67810353 | 3.19415800  | 3.12968888 |
| C | -1.42717209 | 3.91638307  | 3.12970444 |
| C | 1.42717021  | 3.91638470  | 3.12968888 |
| C | 2.67810119  | 3.19415882  | 3.12970444 |
| C | 3.91927588  | -1.42644454 | 4.37658434 |
| C | 3.19497892  | -2.68096600 | 4.37658025 |
| C | 0.72430074  | -4.10741475 | 4.37658434 |
| C | -0.72429520 | -4.10741591 | 4.37658025 |
| C | -3.19497515 | -2.68097021 | 4.37658434 |
| C | -3.91927412 | -1.42644991 | 4.37658025 |
| C | -3.91927588 | 1.42644454  | 4.37658434 |
| C | -3.19497892 | 2.68096600  | 4.37658025 |
| C | -0.72430074 | 4.10741475  | 4.37658434 |
| C | 0.72429520  | 4.10741591  | 4.37658025 |
| C | 3.19497515  | 2.68097021  | 4.37658434 |
| C | 3.91927412  | 1.42644991  | 4.37658025 |
| C | 2.67406325  | -3.19238169 | 5.62712912 |
| C | 1.42765491  | -3.91199594 | 5.62710596 |
| C | -1.42765202 | -3.91199755 | 5.62712912 |
| C | -2.67406041 | -3.19238339 | 5.62710596 |
| C | -4.10171527 | -0.71961586 | 5.62712912 |
| C | -4.10171532 | 0.71961255  | 5.62710596 |
| C | -2.67406325 | 3.19238169  | 5.62712912 |
| C | -1.42765491 | 3.91199594  | 5.62710596 |
| C | 1.42765202  | 3.91199755  | 5.62712912 |
| C | 2.67406041  | 3.19238339  | 5.62710596 |
| C | 4.10171527  | 0.71961586  | 5.62712912 |
| C | 4.10171532  | -0.71961255 | 5.62710596 |
| C | 0.72091398  | -4.10426861 | 6.88276265 |
| C | -0.72091188 | -4.10426808 | 6.88273242 |
| C | -3.19394389 | -2.67646413 | 6.88276265 |
| C | -3.91485637 | -1.42780604 | 6.88273242 |
| C | -3.91485787 | 1.42780448  | 6.88276265 |
| C | -3.19394448 | 2.67646205  | 6.88273242 |
| C | -0.72091398 | 4.10426861  | 6.88276265 |
| C | 0.72091188  | 4.10426808  | 6.88273242 |
| C | 3.19394389  | 2.67646413  | 6.88276265 |
| C | 3.91485637  | 1.42780604  | 6.88273242 |
| C | 3.91485787  | -1.42780448 | 6.88276265 |

|   |             |             |             |
|---|-------------|-------------|-------------|
| C | 3.19394448  | -2.67646205 | 6.88273242  |
| C | -1.42710381 | -3.92226922 | 8.13078511  |
| C | -2.68323372 | -3.19704274 | 8.13076800  |
| C | -4.11033669 | -0.72522646 | 8.13078511  |
| C | -4.11033709 | 0.72522719  | 8.13076800  |
| C | -2.68323288 | 3.19704276  | 8.13078511  |
| C | -1.42710337 | 3.92226994  | 8.13076800  |
| C | 1.42710381  | 3.92226922  | 8.13078511  |
| C | 2.68323372  | 3.19704274  | 8.13076800  |
| C | 4.11033669  | 0.72522646  | 8.13078511  |
| C | 4.11033709  | -0.72522719 | 8.13076800  |
| C | 2.68323288  | -3.19704276 | 8.13078511  |
| C | 1.42710337  | -3.92226994 | 8.13076800  |
| C | -3.19437629 | -2.67657065 | 9.37853904  |
| C | -3.91516719 | -1.42812399 | 9.37855106  |
| C | -3.91516632 | 1.42812569  | 9.37853904  |
| C | -3.19437525 | 2.67657225  | 9.37855106  |
| C | -0.72079003 | 4.10469634  | 9.37853904  |
| C | 0.72079194  | 4.10469625  | 9.37855106  |
| C | 3.19437629  | 2.67657065  | 9.37853904  |
| C | 3.91516719  | 1.42812399  | 9.37855106  |
| C | 3.91516632  | -1.42812569 | 9.37853904  |
| C | 3.19437525  | -2.67657225 | 9.37855106  |
| C | 0.72079003  | -4.10469634 | 9.37853904  |
| C | -0.72079194 | -4.10469625 | 9.37855106  |
| C | -4.10242427 | -0.71916442 | 10.63438125 |
| C | -4.10242375 | 0.71916599  | 10.63442015 |
| C | -2.67402679 | 3.19322143  | 10.63438125 |
| C | -1.42839586 | 3.91238618  | 10.63442015 |
| C | 1.42839748  | 3.91238584  | 10.63438125 |
| C | 2.67402789  | 3.19322019  | 10.63442015 |
| C | 4.10242427  | 0.71916442  | 10.63438125 |
| C | 4.10242375  | -0.71916599 | 10.63442015 |
| C | 2.67402679  | -3.19322143 | 10.63438125 |
| C | 1.42839586  | -3.91238618 | 10.63442015 |
| C | -1.42839748 | -3.91238584 | 10.63438125 |
| C | -2.67402789 | -3.19322019 | 10.63442015 |
| C | -3.92053394 | 1.42607505  | 11.88501619 |
| C | -3.19528642 | 2.68224299  | 11.88506609 |
| C | -0.72524975 | 4.10831952  | 11.88501619 |
| C | 0.72524736  | 4.10832071  | 11.88506609 |
| C | 3.19528419  | 2.68224447  | 11.88501619 |
| C | 3.92053378  | 1.42607772  | 11.88506609 |
| C | 3.92053394  | -1.42607505 | 11.88501619 |
| C | 3.19528642  | -2.68224299 | 11.88506609 |
| C | 0.72524975  | -4.10831952 | 11.88501619 |
| C | -0.72524736 | -4.10832071 | 11.88506609 |
| C | -3.19528419 | -2.68224447 | 11.88501619 |
| C | -3.92053378 | -1.42607772 | 11.88506609 |
| C | -2.67497876 | 3.18975926  | 13.12964718 |
| C | -1.42492715 | 3.91147704  | 13.12968709 |
| C | 1.42492317  | 3.91147919  | 13.12964718 |
| C | 2.67497491  | 3.18976163  | 13.12968709 |
| C | 4.09990193  | 0.72171993  | 13.12964718 |
| C | 4.09990206  | -0.72171542 | 13.12968709 |
| C | 2.67497876  | -3.18975926 | 13.12964718 |
| C | 1.42492715  | -3.91147704 | 13.12968709 |
| C | -1.42492317 | -3.91147919 | 13.12964718 |
| C | -2.67497491 | -3.18976163 | 13.12968709 |
| C | -4.09990193 | -0.72171993 | 13.12964718 |
| C | -4.09990206 | 0.72171542  | 13.12968709 |
| C | -0.71462745 | 4.08591384  | 14.38558877 |
| C | 0.71462406  | 4.08591363  | 14.38561005 |
| C | 3.18119146  | 2.66184245  | 14.38558877 |
| C | 3.89581703  | 1.42407422  | 14.38561005 |
| C | 3.89581891  | -1.42407139 | 14.38558877 |
| C | 3.18119297  | -2.66183941 | 14.38561005 |
| C | 0.71462745  | -4.08591384 | 14.38558877 |
| C | -0.71462406 | -4.08591363 | 14.38561005 |
| C | -3.18119146 | -2.66184245 | 14.38558877 |

|   |             |             |              |
|---|-------------|-------------|--------------|
| C | -3.89581703 | -1.42407422 | 14.38561005  |
| C | -3.89581891 | 1.42407139  | 14.38558877  |
| C | -3.18119297 | 2.66183941  | 14.38561005  |
| C | 1.41970246  | 3.91178784  | 15.64535348  |
| C | 2.67785453  | 3.18539450  | 15.64536215  |
| C | 4.09755887  | 0.72639553  | 15.64535348  |
| C | 4.09755982  | -0.72639280 | 15.64536215  |
| C | 2.67785641  | -3.18539231 | 15.64535348  |
| C | 1.41970530  | -3.91178730 | 15.64536215  |
| C | -1.41970246 | -3.91178784 | 15.64535348  |
| C | -2.67785453 | -3.18539450 | 15.64536215  |
| C | -4.09755887 | -0.72639553 | 15.64535348  |
| C | -4.09755982 | 0.72639280  | 15.64536215  |
| C | -2.67785641 | 3.18539231  | 15.64535348  |
| C | -1.41970530 | 3.91178730  | 15.64536215  |
| C | 3.22191272  | 2.70637535  | 16.88615253  |
| C | 3.95474592  | 1.43707153  | 16.88615784  |
| C | 3.95474616  | -1.43707058 | 16.88615253  |
| C | 3.22191341  | -2.70637466 | 16.88615784  |
| C | 0.73283345  | -4.14344594 | 16.88615253  |
| C | -0.73283250 | -4.14344620 | 16.88615784  |
| C | -3.22191272 | -2.70637535 | 16.88615253  |
| C | -3.95474592 | -1.43707153 | 16.88615784  |
| C | -3.95474616 | 1.43707058  | 16.88615253  |
| C | -3.22191341 | 2.70637466  | 16.88615784  |
| C | -0.73283345 | 4.14344594  | 16.88615253  |
| C | 0.73283250  | 4.14344620  | 16.88615784  |
| C | 4.21054839  | 0.69084263  | 18.10385241  |
| C | 4.21054770  | -0.69084327 | 18.10385867  |
| C | 2.70356147  | -3.30102055 | 18.10385241  |
| C | 1.50698602  | -3.99186291 | 18.10385867  |
| C | -1.50698692 | -3.99186319 | 18.10385241  |
| C | -2.70356167 | -3.30101963 | 18.10385867  |
| C | -4.21054839 | -0.69084263 | 18.10385241  |
| C | -4.21054770 | 0.69084327  | 18.10385867  |
| C | -2.70356147 | 3.30102055  | 18.10385241  |
| C | -1.50698602 | 3.99186291  | 18.10385867  |
| C | 1.50698692  | 3.99186319  | 18.10385241  |
| C | 2.70356167  | 3.30101963  | 18.10385867  |
| H | -4.32058222 | 1.07673313  | -19.05857100 |
| H | -3.09277213 | 3.20337010  | -19.05857360 |
| H | -1.22781287 | 4.28010053  | -19.05857100 |
| H | 1.22781382  | 4.28010428  | -19.05857360 |
| H | 3.09276935  | 3.20336740  | -19.05857100 |
| H | 4.32058595  | 1.07673418  | -19.05857360 |
| H | 4.32058222  | -1.07673313 | -19.05857100 |
| H | 3.09277213  | -3.20337010 | -19.05857360 |
| H | 1.22781287  | -4.28010053 | -19.05857100 |
| H | -1.22781382 | -4.28010428 | -19.05857360 |
| H | -3.09276935 | -3.20336740 | -19.05857100 |
| H | -4.32058595 | -1.07673418 | -19.05857360 |
| H | 4.28010428  | 1.22781382  | 19.05857360  |
| H | 4.28010053  | -1.22781287 | 19.05857100  |
| H | 3.20337010  | -3.09277213 | 19.05857360  |
| H | 1.07673313  | -4.32058222 | 19.05857100  |
| H | -1.07673418 | -4.32058595 | 19.05857360  |
| H | -3.20336740 | -3.09276935 | 19.05857100  |
| H | -4.28010428 | -1.22781382 | 19.05857360  |
| H | -4.28010053 | 1.22781287  | 19.05857100  |
| H | -3.20337010 | 3.09277213  | 19.05857360  |
| H | -1.07673313 | 4.32058222  | 19.05857100  |
| H | 1.07673418  | 4.32058595  | 19.05857360  |
| H | 3.20336740  | 3.09276935  | 19.05857100  |

Nanotube (6,6) u15v6s  
B3LYP/STO-3G Energy: -14018.982338

|   |             |            |              |
|---|-------------|------------|--------------|
| C | -3.47000782 | 2.48977423 | -18.71132143 |
|---|-------------|------------|--------------|

|   |             |             |              |
|---|-------------|-------------|--------------|
| C | -2.48977423 | 3.47000782  | -18.71132143 |
| C | 0.42120382  | 4.25000204  | -18.71132143 |
| C | 1.76022781  | 3.89121164  | -18.71132143 |
| C | 3.89121164  | 1.76022781  | -18.71132143 |
| C | 4.25000204  | 0.42120382  | -18.71132143 |
| C | 3.47000782  | -2.48977423 | -18.71132143 |
| C | 2.48977423  | -3.47000782 | -18.71132143 |
| C | -0.42120382 | -4.25000204 | -18.71132143 |
| C | -1.76022781 | -3.89121164 | -18.71132143 |
| C | -3.89121164 | -1.76022781 | -18.71132143 |
| C | -4.25000204 | -0.42120382 | -18.71132143 |
| C | -1.78577278 | 3.81815039  | -17.49829379 |
| C | -0.36255060 | 4.19950162  | -17.49829379 |
| C | 2.41372884  | 3.45559979  | -17.49829379 |
| C | 3.45559979  | 2.41372884  | -17.49829379 |
| C | 4.19950162  | -0.36255060 | -17.49829379 |
| C | 3.81815039  | -1.78577278 | -17.49829379 |
| C | 1.78577278  | -3.81815039 | -17.49829379 |
| C | 0.36255060  | -4.19950162 | -17.49829379 |
| C | -2.41372884 | -3.45559979 | -17.49829379 |
| C | -3.45559979 | -2.41372884 | -17.49829379 |
| C | -4.19950162 | 0.36255060  | -17.49829379 |
| C | -3.81815039 | 1.78577278  | -17.49829379 |
| C | 0.35978220  | 4.14559222  | -16.25826810 |
| C | 1.76121558  | 3.77007928  | -16.25826810 |
| C | 3.77007928  | 1.76121558  | -16.25826810 |
| C | 4.14559222  | 0.35978220  | -16.25826810 |
| C | 3.41029708  | -2.38437664 | -16.25826810 |
| C | 2.38437664  | -3.41029708 | -16.25826810 |
| C | -0.35978220 | -4.14559222 | -16.25826810 |
| C | -1.76121558 | -3.77007928 | -16.25826810 |
| C | -3.77007928 | -1.76121558 | -16.25826810 |
| C | -4.14559222 | -0.35978220 | -16.25826810 |
| C | -3.41029708 | 2.38437664  | -16.25826810 |
| C | -2.38437664 | 3.41029708  | -16.25826810 |
| C | 2.38500992  | 3.39777548  | -14.99563105 |
| C | 3.39777548  | 2.38500992  | -14.99563105 |
| C | 4.13506484  | -0.36659144 | -14.99563105 |
| C | 3.76436692  | -1.75005492 | -14.99563105 |
| C | 1.75005492  | -3.76436692 | -14.99563105 |
| C | 0.36659144  | -4.13506484 | -14.99563105 |
| C | -2.38500992 | -3.39777548 | -14.99563105 |
| C | -3.39777548 | -2.38500992 | -14.99563105 |
| C | -4.13506484 | 0.36659144  | -14.99563105 |
| C | -3.76436692 | 1.75005492  | -14.99563105 |
| C | -1.75005492 | 3.76436692  | -14.99563105 |
| C | -0.36659144 | 4.13506484  | -14.99563105 |
| C | 3.77863739  | 1.76399362  | -13.74468349 |
| C | 4.15439278  | 0.36165541  | -13.74468349 |
| C | 3.41698198  | -2.39039916 | -13.74468349 |
| C | 2.39039916  | -3.41698198 | -13.74468349 |
| C | -0.36165541 | -4.15439278 | -13.74468349 |
| C | -1.76399362 | -3.77863739 | -13.74468349 |
| C | -3.77863739 | -1.76399362 | -13.74468349 |
| C | -4.15439278 | -0.36165541 | -13.74468349 |
| C | -3.41698198 | 2.39039916  | -13.74468349 |
| C | -2.39039916 | 3.41698198  | -13.74468349 |
| C | 0.36165541  | 4.15439278  | -13.74468349 |
| C | 1.76399362  | 3.77863739  | -13.74468349 |
| C | 4.15638009  | -0.36381917 | -12.50184058 |
| C | 3.78144033  | -1.76311340 | -12.50184058 |
| C | 1.76311340  | -3.78144033 | -12.50184058 |
| C | 0.36381917  | -4.15638009 | -12.50184058 |
| C | -2.39326669 | -3.41762116 | -12.50184058 |
| C | -3.41762116 | -2.39326669 | -12.50184058 |
| C | -4.15638009 | 0.36381917  | -12.50184058 |
| C | -3.78144033 | 1.76311340  | -12.50184058 |
| C | -1.76311340 | 3.78144033  | -12.50184058 |
| C | -0.36381917 | 4.15638009  | -12.50184058 |
| C | 2.39326669  | 3.41762116  | -12.50184058 |

|   |             |             |              |
|---|-------------|-------------|--------------|
| C | 3.41762116  | 2.39326669  | -12.50184058 |
| C | 3.41162413  | -2.39360071 | -11.24732101 |
| C | 2.39360071  | -3.41162413 | -11.24732101 |
| C | -0.36710696 | -4.15135352 | -11.24732101 |
| C | -1.75775281 | -3.77873109 | -11.24732101 |
| C | -3.77873109 | -1.75775281 | -11.24732101 |
| C | -4.15135352 | -0.36710696 | -11.24732101 |
| C | -3.41162413 | 2.39360071  | -11.24732101 |
| C | -2.39360071 | 3.41162413  | -11.24732101 |
| C | 0.36710696  | 4.15135352  | -11.24732101 |
| C | 1.75775281  | 3.77873109  | -11.24732101 |
| C | 3.77873109  | 1.75775281  | -11.24732101 |
| C | 4.15135352  | 0.36710696  | -11.24732101 |
| C | 1.76506717  | -3.78374582 | -9.99613977  |
| C | 0.36327990  | -4.15935358 | -9.99613977  |
| C | -2.39428641 | -3.42046592 | -9.99613977  |
| C | -3.42046592 | -2.39428641 | -9.99613977  |
| C | -4.15935358 | 0.36327990  | -9.99613977  |
| C | -3.78374582 | 1.76506717  | -9.99613977  |
| C | -1.76506717 | 3.78374582  | -9.99613977  |
| C | -0.36327990 | 4.15935358  | -9.99613977  |
| C | 2.39428641  | 3.42046592  | -9.99613977  |
| C | 3.42046592  | 2.39428641  | -9.99613977  |
| C | 4.15935358  | -0.36327990 | -9.99613977  |
| C | 3.78374582  | -1.76506717 | -9.99613977  |
| C | -0.36403537 | -4.15842349 | -8.75188631  |
| C | -1.76394787 | -3.78331807 | -8.75188631  |
| C | -3.78331807 | -1.76394787 | -8.75188631  |
| C | -4.15842349 | -0.36403537 | -8.75188631  |
| C | -3.41928270 | 2.39447563  | -8.75188631  |
| C | -2.39447563 | 3.41928270  | -8.75188631  |
| C | 0.36403537  | 4.15842349  | -8.75188631  |
| C | 1.76394787  | 3.78331807  | -8.75188631  |
| C | 3.78331807  | 1.76394787  | -8.75188631  |
| C | 4.15842349  | 0.36403537  | -8.75188631  |
| C | 3.41928270  | -2.39447563 | -8.75188631  |
| C | 2.39447563  | -3.41928270 | -8.75188631  |
| C | -2.39338274 | -3.41246802 | -7.49891179  |
| C | -3.41246802 | -2.39338274 | -7.49891179  |
| C | -4.15197536 | 0.36649624  | -7.49891179  |
| C | -3.77896426 | 1.75859263  | -7.49891179  |
| C | -1.75859263 | 3.77896426  | -7.49891179  |
| C | -0.36649624 | 4.15197536  | -7.49891179  |
| C | 2.39338274  | 3.41246802  | -7.49891179  |
| C | 3.41246802  | 2.39338274  | -7.49891179  |
| C | 4.15197536  | -0.36649624 | -7.49891179  |
| C | 3.77896426  | -1.75859263 | -7.49891179  |
| C | 1.75859263  | -3.77896426 | -7.49891179  |
| C | 0.36649624  | -4.15197536 | -7.49891179  |
| C | -3.78189270 | -1.76386497 | -6.24717133  |
| C | -4.15714764 | -0.36339448 | -6.24717133  |
| C | -3.41849822 | 2.39328267  | -6.24717133  |
| C | -2.39328267 | 3.41849822  | -6.24717133  |
| C | 0.36339448  | 4.15714764  | -6.24717133  |
| C | 1.76386497  | 3.78189270  | -6.24717133  |
| C | 3.78189270  | 1.76386497  | -6.24717133  |
| C | 4.15714764  | 0.36339448  | -6.24717133  |
| C | 3.41849822  | -2.39328267 | -6.24717133  |
| C | 2.39328267  | -3.41849822 | -6.24717133  |
| C | -0.36339448 | -4.15714764 | -6.24717133  |
| C | -1.76386497 | -3.78189270 | -6.24717133  |
| C | -4.15629105 | 0.36367419  | -5.00186165  |
| C | -3.78129073 | 1.76319444  | -5.00186165  |
| C | -1.76319444 | 3.78129073  | -5.00186165  |
| C | -0.36367419 | 4.15629105  | -5.00186165  |
| C | 2.39309661  | 3.41761655  | -5.00186165  |
| C | 3.41761655  | 2.39309661  | -5.00186165  |
| C | 4.15629105  | -0.36367419 | -5.00186165  |
| C | 3.78129073  | -1.76319444 | -5.00186165  |
| C | 1.76319444  | -3.78129073 | -5.00186165  |



|   |             |             |             |
|---|-------------|-------------|-------------|
| C | 0.36367419  | -4.15629105 | -5.00186165 |
| C | -2.39309661 | -3.41761655 | -5.00186165 |
| C | -3.41761655 | -2.39309661 | -5.00186165 |
| C | -3.41193409 | 2.39273430  | -3.74924139 |
| C | -2.39273430 | 3.41193409  | -3.74924139 |
| C | 0.36620165  | 4.15118875  | -3.74924139 |
| C | 1.75845444  | 3.77813573  | -3.74924139 |
| C | 3.77813573  | 1.75845444  | -3.74924139 |
| C | 4.15118875  | 0.36620165  | -3.74924139 |
| C | 3.41193409  | -2.39273430 | -3.74924139 |
| C | 2.39273430  | -3.41193409 | -3.74924139 |
| C | -0.36620165 | -4.15118875 | -3.74924139 |
| C | -1.75845444 | -3.77813573 | -3.74924139 |
| C | -3.77813573 | -1.75845444 | -3.74924139 |
| C | -4.15118875 | -0.36620165 | -3.74924139 |
| C | -1.76358446 | 3.78185196  | -2.49738823 |
| C | -0.36361704 | 4.15697210  | -2.49738823 |
| C | 2.39338764  | 3.41823493  | -2.49738823 |
| C | 3.41823493  | 2.39338764  | -2.49738823 |
| C | 4.15697210  | -0.36361704 | -2.49738823 |
| C | 3.78185196  | -1.76358446 | -2.49738823 |
| C | 1.76358446  | -3.78185196 | -2.49738823 |
| C | 0.36361704  | -4.15697210 | -2.49738823 |
| C | -2.39338764 | -3.41823493 | -2.49738823 |
| C | -3.41823493 | -2.39338764 | -2.49738823 |
| C | -4.15697210 | 0.36361704  | -2.49738823 |
| C | -3.78185196 | 1.76358446  | -2.49738823 |
| C | 0.36363078  | 4.15639260  | -1.25211579 |
| C | 1.76328281  | 3.78135696  | -1.25211579 |
| C | 3.78135696  | 1.76328281  | -1.25211579 |
| C | 4.15639260  | 0.36363078  | -1.25211579 |
| C | 3.41772619  | -2.39310979 | -1.25211579 |
| C | 2.39310979  | -3.41772619 | -1.25211579 |
| C | -0.36363078 | -4.15639260 | -1.25211579 |
| C | -1.76328281 | -3.78135696 | -1.25211579 |
| C | -3.78135696 | -1.76328281 | -1.25211579 |
| C | -4.15639260 | -0.36363078 | -1.25211579 |
| C | -3.41772619 | 2.39310979  | -1.25211579 |
| C | -2.39310979 | 3.41772619  | -1.25211579 |
| C | 2.39235714  | 3.41153400  | 0.00000000  |
| C | 3.41153400  | 2.39235714  | 0.00000000  |
| C | 4.15065368  | -0.36607506 | 0.00000000  |
| C | 3.77760906  | -1.75829654 | 0.00000000  |
| C | 1.75829654  | -3.77760906 | 0.00000000  |
| C | 0.36607506  | -4.15065368 | 0.00000000  |
| C | -2.39235714 | -3.41153400 | 0.00000000  |
| C | -3.41153400 | -2.39235714 | 0.00000000  |
| C | -4.15065368 | 0.36607506  | 0.00000000  |
| C | -3.77760906 | 1.75829654  | 0.00000000  |
| C | -1.75829654 | 3.77760906  | 0.00000000  |
| C | -0.36607506 | 4.15065368  | 0.00000000  |
| C | 3.78135696  | 1.76328281  | 1.25211579  |
| C | 4.15639260  | 0.36363078  | 1.25211579  |
| C | 3.41772619  | -2.39310979 | 1.25211579  |
| C | 2.39310979  | -3.41772619 | 1.25211579  |
| C | -0.36363078 | -4.15639260 | 1.25211579  |
| C | -1.76328281 | -3.78135696 | 1.25211579  |
| C | -3.78135696 | -1.76328281 | 1.25211579  |
| C | -4.15639260 | -0.36363078 | 1.25211579  |
| C | -3.41772619 | 2.39310979  | 1.25211579  |
| C | -2.39310979 | 3.41772619  | 1.25211579  |
| C | 0.36363078  | 4.15639260  | 1.25211579  |
| C | 1.76328281  | 3.78135696  | 1.25211579  |
| C | 4.15697210  | -0.36361704 | 2.49738823  |
| C | 3.78185196  | -1.76358446 | 2.49738823  |
| C | 1.76358446  | -3.78185196 | 2.49738823  |
| C | 0.36361704  | -4.15697210 | 2.49738823  |
| C | -2.39338764 | -3.41823493 | 2.49738823  |
| C | -3.41823493 | -2.39338764 | 2.49738823  |
| C | -4.15697210 | 0.36361704  | 2.49738823  |

|   |             |             |            |
|---|-------------|-------------|------------|
| C | -3.78185196 | 1.76358446  | 2.49738823 |
| C | -1.76358446 | 3.78185196  | 2.49738823 |
| C | -0.36361704 | 4.15697210  | 2.49738823 |
| C | 2.39338764  | 3.41823493  | 2.49738823 |
| C | 3.41823493  | 2.39338764  | 2.49738823 |
| C | 3.41193409  | -2.39273430 | 3.74924139 |
| C | 2.39273430  | -3.41193409 | 3.74924139 |
| C | -0.36620165 | -4.15118875 | 3.74924139 |
| C | -1.75845444 | -3.77813573 | 3.74924139 |
| C | -3.77813573 | -1.75845444 | 3.74924139 |
| C | -4.15118875 | -0.36620165 | 3.74924139 |
| C | -3.41193409 | 2.39273430  | 3.74924139 |
| C | -2.39273430 | 3.41193409  | 3.74924139 |
| C | 0.36620165  | 4.15118875  | 3.74924139 |
| C | 1.75845444  | 3.77813573  | 3.74924139 |
| C | 3.77813573  | 1.75845444  | 3.74924139 |
| C | 4.15118875  | 0.36620165  | 3.74924139 |
| C | 1.76319444  | -3.78129073 | 5.00186165 |
| C | 0.36367419  | -4.15629105 | 5.00186165 |
| C | -2.39309661 | -3.41761655 | 5.00186165 |
| C | -3.41761655 | -2.39309661 | 5.00186165 |
| C | -4.15629105 | 0.36367419  | 5.00186165 |
| C | -3.78129073 | 1.76319444  | 5.00186165 |
| C | -1.76319444 | 3.78129073  | 5.00186165 |
| C | -0.36367419 | 4.15629105  | 5.00186165 |
| C | 2.39309661  | 3.41761655  | 5.00186165 |
| C | 3.41761655  | 2.39309661  | 5.00186165 |
| C | 4.15629105  | -0.36367419 | 5.00186165 |
| C | 3.78129073  | -1.76319444 | 5.00186165 |
| C | -0.36339448 | -4.15714764 | 6.24717133 |
| C | -1.76386497 | -3.78189270 | 6.24717133 |
| C | -3.78189270 | -1.76386497 | 6.24717133 |
| C | -4.15714764 | -0.36339448 | 6.24717133 |
| C | -3.41849822 | 2.39328267  | 6.24717133 |
| C | -2.39328267 | 3.41849822  | 6.24717133 |
| C | 0.36339448  | 4.15714764  | 6.24717133 |
| C | 1.76386497  | 3.78189270  | 6.24717133 |
| C | 3.78189270  | 1.76386497  | 6.24717133 |
| C | 4.15714764  | 0.36339448  | 6.24717133 |
| C | 3.41849822  | -2.39328267 | 6.24717133 |
| C | 2.39328267  | -3.41849822 | 6.24717133 |
| C | -2.39338274 | -3.41246802 | 7.49891179 |
| C | -3.41246802 | -2.39338274 | 7.49891179 |
| C | -4.15197536 | 0.36649624  | 7.49891179 |
| C | -3.77896426 | 1.75859263  | 7.49891179 |
| C | -1.75859263 | 3.77896426  | 7.49891179 |
| C | -0.36649624 | 4.15197536  | 7.49891179 |
| C | 2.39338274  | 3.41246802  | 7.49891179 |
| C | 3.41246802  | 2.39338274  | 7.49891179 |
| C | 4.15197536  | -0.36649624 | 7.49891179 |
| C | 3.77896426  | -1.75859263 | 7.49891179 |
| C | 1.75859263  | -3.77896426 | 7.49891179 |
| C | 0.36649624  | -4.15197536 | 7.49891179 |
| C | -3.78331807 | -1.76394787 | 8.75188631 |
| C | -4.15842349 | -0.36403537 | 8.75188631 |
| C | -3.41928270 | 2.39447563  | 8.75188631 |
| C | -2.39447563 | 3.41928270  | 8.75188631 |
| C | 0.36403537  | 4.15842349  | 8.75188631 |
| C | 1.76394787  | 3.78331807  | 8.75188631 |
| C | 3.78331807  | 1.76394787  | 8.75188631 |
| C | 4.15842349  | 0.36403537  | 8.75188631 |
| C | 3.41928270  | -2.39447563 | 8.75188631 |
| C | 2.39447563  | -3.41928270 | 8.75188631 |
| C | -0.36403537 | -4.15842349 | 8.75188631 |
| C | -1.76394787 | -3.78331807 | 8.75188631 |
| C | -4.15935358 | 0.36327990  | 9.99613977 |
| C | -3.78374582 | 1.76506717  | 9.99613977 |
| C | -1.76506717 | 3.78374582  | 9.99613977 |
| C | -0.36327990 | 4.15935358  | 9.99613977 |
| C | 2.39428641  | 3.42046592  | 9.99613977 |

|   |             |             |             |
|---|-------------|-------------|-------------|
| C | 3.42046592  | 2.39428641  | 9.99613977  |
| C | 4.15935358  | -0.36327990 | 9.99613977  |
| C | 3.78374582  | -1.76506717 | 9.99613977  |
| C | 1.76506717  | -3.78374582 | 9.99613977  |
| C | 0.36327990  | -4.15935358 | 9.99613977  |
| C | -2.39428641 | -3.42046592 | 9.99613977  |
| C | -3.42046592 | -2.39428641 | 9.99613977  |
| C | -3.41162413 | 2.39360071  | 11.24732101 |
| C | -2.39360071 | 3.41162413  | 11.24732101 |
| C | 0.36710696  | 4.15135352  | 11.24732101 |
| C | 1.75775281  | 3.77873109  | 11.24732101 |
| C | 3.77873109  | 1.75775281  | 11.24732101 |
| C | 4.15135352  | 0.36710696  | 11.24732101 |
| C | 3.41162413  | -2.39360071 | 11.24732101 |
| C | 2.39360071  | -3.41162413 | 11.24732101 |
| C | -0.36710696 | -4.15135352 | 11.24732101 |
| C | -1.75775281 | -3.77873109 | 11.24732101 |
| C | -3.77873109 | -1.75775281 | 11.24732101 |
| C | -4.15135352 | -0.36710696 | 11.24732101 |
| C | -1.76311340 | 3.78144033  | 12.50184058 |
| C | -0.36381917 | 4.15638009  | 12.50184058 |
| C | 2.39326669  | 3.41762116  | 12.50184058 |
| C | 3.41762116  | 2.39326669  | 12.50184058 |
| C | 4.15638009  | -0.36381917 | 12.50184058 |
| C | 3.78144033  | -1.76311340 | 12.50184058 |
| C | 1.76311340  | -3.78144033 | 12.50184058 |
| C | 0.36381917  | -4.15638009 | 12.50184058 |
| C | -2.39326669 | -3.41762116 | 12.50184058 |
| C | -3.41762116 | -2.39326669 | 12.50184058 |
| C | -4.15638009 | 0.36381917  | 12.50184058 |
| C | -3.78144033 | 1.76311340  | 12.50184058 |
| C | 0.36165541  | 4.15439278  | 13.74468349 |
| C | 1.76399362  | 3.77863739  | 13.74468349 |
| C | 3.77863739  | 1.76399362  | 13.74468349 |
| C | 4.15439278  | 0.36165541  | 13.74468349 |
| C | 3.41698198  | -2.39039916 | 13.74468349 |
| C | 2.39039916  | -3.41698198 | 13.74468349 |
| C | -0.36165541 | -4.15439278 | 13.74468349 |
| C | -1.76399362 | -3.77863739 | 13.74468349 |
| C | -3.77863739 | -1.76399362 | 13.74468349 |
| C | -4.15439278 | -0.36165541 | 13.74468349 |
| C | -3.41698198 | 2.39039916  | 13.74468349 |
| C | -2.39039916 | 3.41698198  | 13.74468349 |
| C | 2.38500992  | 3.39777548  | 14.99563105 |
| C | 3.39777548  | 2.38500992  | 14.99563105 |
| C | 4.13506484  | -0.36659144 | 14.99563105 |
| C | 3.76436692  | -1.75005492 | 14.99563105 |
| C | 1.75005492  | -3.76436692 | 14.99563105 |
| C | 0.36659144  | -4.13506484 | 14.99563105 |
| C | -2.38500992 | -3.39777548 | 14.99563105 |
| C | -3.39777548 | -2.38500992 | 14.99563105 |
| C | -4.13506484 | 0.36659144  | 14.99563105 |
| C | -3.76436692 | 1.75005492  | 14.99563105 |
| C | -1.75005492 | 3.76436692  | 14.99563105 |
| C | -0.36659144 | 4.13506484  | 14.99563105 |
| C | 3.77007928  | 1.76121558  | 16.25826810 |
| C | 4.14559222  | 0.35978220  | 16.25826810 |
| C | 3.41029708  | -2.38437664 | 16.25826810 |
| C | 2.38437664  | -3.41029708 | 16.25826810 |
| C | -0.35978220 | -4.14559222 | 16.25826810 |
| C | -1.76121558 | -3.77007928 | 16.25826810 |
| C | -3.77007928 | -1.76121558 | 16.25826810 |
| C | -4.14559222 | -0.35978220 | 16.25826810 |
| C | -3.41029708 | 2.38437664  | 16.25826810 |
| C | -2.38437664 | 3.41029708  | 16.25826810 |
| C | 0.35978220  | 4.14559222  | 16.25826810 |
| C | 1.76121558  | 3.77007928  | 16.25826810 |
| C | 4.19950162  | -0.36255060 | 17.49829379 |
| C | 3.81815039  | -1.78577278 | 17.49829379 |
| C | 1.78577278  | -3.81815039 | 17.49829379 |

|   |             |             |              |
|---|-------------|-------------|--------------|
| C | 0.36255060  | -4.19950162 | 17.49829379  |
| C | -2.41372884 | -3.45559979 | 17.49829379  |
| C | -3.45559979 | -2.41372884 | 17.49829379  |
| C | -4.19950162 | 0.36255060  | 17.49829379  |
| C | -3.81815039 | 1.78577278  | 17.49829379  |
| C | -1.78577278 | 3.81815039  | 17.49829379  |
| C | -0.36255060 | 4.19950162  | 17.49829379  |
| C | 2.41372884  | 3.45559979  | 17.49829379  |
| C | 3.45559979  | 2.41372884  | 17.49829379  |
| C | 3.47000782  | -2.48977423 | 18.71132143  |
| C | 2.48977423  | -3.47000782 | 18.71132143  |
| C | -0.42120382 | -4.25000204 | 18.71132143  |
| C | -1.76022781 | -3.89121164 | 18.71132143  |
| C | -3.89121164 | -1.76022781 | 18.71132143  |
| C | -4.25000204 | -0.42120382 | 18.71132143  |
| C | -3.47000782 | 2.48977423  | 18.71132143  |
| C | -2.48977423 | 3.47000782  | 18.71132143  |
| C | 0.42120382  | 4.25000204  | 18.71132143  |
| C | 1.76022781  | 3.89121164  | 18.71132143  |
| C | 3.89121164  | 1.76022781  | 18.71132143  |
| C | 4.25000204  | 0.42120382  | 18.71132143  |
| H | -3.88992015 | 2.15445858  | -19.66833300 |
| H | -2.15445858 | 3.88992015  | -19.66833300 |
| H | -0.07914421 | 4.44599896  | -19.66833300 |
| H | 2.29154038  | 3.81077594  | -19.66833300 |
| H | 3.81077594  | 2.29154038  | -19.66833300 |
| H | 4.44599896  | -0.07914421 | -19.66833300 |
| H | 3.88992015  | -2.15445858 | -19.66833300 |
| H | 2.15445858  | -3.88992015 | -19.66833300 |
| H | 0.07914421  | -4.44599896 | -19.66833300 |
| H | -2.29154038 | -3.81077594 | -19.66833300 |
| H | -3.81077594 | -2.29154038 | -19.66833300 |
| H | -4.44599896 | 0.07914421  | -19.66833300 |
| H | 3.88992015  | -2.15445858 | 19.66833300  |
| H | 2.15445858  | -3.88992015 | 19.66833300  |
| H | 0.07914421  | -4.44599896 | 19.66833300  |
| H | -2.29154038 | -3.81077594 | 19.66833300  |
| H | -3.81077594 | -2.29154038 | 19.66833300  |
| H | -4.44599896 | 0.07914421  | 19.66833300  |
| H | -3.88992015 | 2.15445858  | 19.66833300  |
| H | -2.15445858 | 3.88992015  | 19.66833300  |
| H | -0.07914421 | 4.44599896  | 19.66833300  |
| H | 2.29154038  | 3.81077594  | 19.66833300  |
| H | 3.81077594  | 2.29154038  | 19.66833300  |
| H | 4.44599896  | -0.07914421 | 19.66833300  |

Nanotube (6,6) ul6v0s  
B3LYP/STO-3G Energy: -14470.761348

|   |             |             |             |
|---|-------------|-------------|-------------|
| C | -3.30224879 | 2.70569199  | 19.34419138 |
| C | -3.99432141 | 1.50698581  | 19.34418685 |
| C | -3.99432239 | -1.50698535 | 19.34419138 |
| C | -3.30224870 | -2.70569091 | 19.34418685 |
| C | -0.69207360 | -4.21267734 | 19.34419138 |
| C | 0.69207271  | -4.21267671 | 19.34418685 |
| C | 3.30224879  | -2.70569199 | 19.34419138 |
| C | 3.99432141  | -1.50698581 | 19.34418685 |
| C | 3.99432239  | 1.50698535  | 19.34419138 |
| C | 3.30224870  | 2.70569091  | 19.34418685 |
| C | 0.69207360  | 4.21267734  | 19.34419138 |
| C | -0.69207271 | 4.21267671  | 19.34418685 |
| C | -4.14781479 | 0.73505110  | 18.12902758 |
| C | -4.14781319 | -0.73505231 | 18.12902220 |
| C | -2.71048032 | -3.22458742 | 18.12902758 |
| C | -1.43733262 | -3.95963775 | 18.12902220 |
| C | 1.43733447  | -3.95963852 | 18.12902758 |
| C | 2.71048057  | -3.22458544 | 18.12902220 |
| C | 4.14781479  | -0.73505110 | 18.12902758 |

|   |             |             |             |
|---|-------------|-------------|-------------|
| C | 4.14781319  | 0.73505231  | 18.12902220 |
| C | 2.71048032  | 3.22458742  | 18.12902758 |
| C | 1.43733262  | 3.95963775  | 18.12902220 |
| C | -1.43733447 | 3.95963852  | 18.12902758 |
| C | -2.71048057 | 3.22458544  | 18.12902220 |
| C | -3.91197735 | -1.42028271 | 16.88914285 |
| C | -3.18598585 | -2.67773265 | 16.88912633 |
| C | -0.72598777 | -4.09801312 | 16.88914285 |
| C | 0.72599158  | -4.09801101 | 16.88912633 |
| C | 3.18598958  | -2.67773041 | 16.88914285 |
| C | 3.91197743  | -1.42027835 | 16.88912633 |
| C | 3.91197735  | 1.42028271  | 16.88914285 |
| C | 3.18598585  | 2.67773265  | 16.88912633 |
| C | 0.72598777  | 4.09801312  | 16.88914285 |
| C | -0.72599158 | 4.09801101  | 16.88912633 |
| C | -3.18598958 | 2.67773041  | 16.88914285 |
| C | -3.91197743 | 1.42027835  | 16.88912633 |
| C | -2.66341952 | -3.18261445 | 15.62790328 |
| C | -1.42451073 | -3.89789865 | 15.62786033 |
| C | 1.42451520  | -3.89789619 | 15.62790328 |
| C | 2.66342388  | -3.18261180 | 15.62786033 |
| C | 4.08793472  | -0.71528174 | 15.62790328 |
| C | 4.08793461  | 0.71528684  | 15.62786033 |
| C | 2.66341952  | 3.18261445  | 15.62790328 |
| C | 1.42451073  | 3.89789865  | 15.62786033 |
| C | -1.42451520 | 3.89789619  | 15.62790328 |
| C | -2.66342388 | 3.18261180  | 15.62786033 |
| C | -4.08793472 | 0.71528174  | 15.62790328 |
| C | -4.08793461 | -0.71528684 | 15.62786033 |
| C | -0.72411328 | -4.10403917 | 14.37467558 |
| C | 0.72412198  | -4.10403834 | 14.37459805 |
| C | 3.19214554  | -2.67912008 | 14.37467558 |
| C | 3.91626245  | -1.42491114 | 14.37459805 |
| C | 3.91625882  | 1.42491909  | 14.37467558 |
| C | 3.19214047  | 2.67912720  | 14.37459805 |
| C | 0.72411328  | 4.10403917  | 14.37467558 |
| C | -0.72412198 | 4.10403834  | 14.37459805 |
| C | -3.19214554 | 2.67912008  | 14.37467558 |
| C | -3.91626245 | 1.42491114  | 14.37459805 |
| C | -3.91625882 | -1.42491909 | 14.37467558 |
| C | -3.19214047 | -2.67912720 | 14.37459805 |
| C | 1.42651123  | -3.92063024 | 13.13151028 |
| C | 2.68210812  | -3.19571049 | 13.13142569 |
| C | 4.10862100  | -0.72492016 | 13.13151028 |
| C | 4.10862053  | 0.72491852  | 13.13142569 |
| C | 2.68210978  | 3.19571008  | 13.13151028 |
| C | 1.42651241  | 3.92062901  | 13.13142569 |
| C | -1.42651123 | 3.92063024  | 13.13151028 |
| C | -2.68210812 | 3.19571049  | 13.13142569 |
| C | -4.10862100 | 0.72492016  | 13.13151028 |
| C | -4.10862053 | -0.72491852 | 13.13142569 |
| C | -2.68210978 | -3.19571008 | 13.13151028 |
| C | -1.42651241 | -3.92062901 | 13.13142569 |
| C | 3.19373060  | -2.67427645 | 11.87869420 |
| C | 3.91285597  | -1.42871563 | 11.87863636 |
| C | 3.91285664  | 1.42871361  | 11.87869420 |
| C | 3.19373202  | 2.67427485  | 11.87863636 |
| C | 0.71912604  | 4.10299006  | 11.87869420 |
| C | -0.71912395 | 4.10299049  | 11.87863636 |
| C | -3.19373060 | 2.67427645  | 11.87869420 |
| C | -3.91285597 | 1.42871563  | 11.87863636 |
| C | -3.91285664 | -1.42871361 | 11.87869420 |
| C | -3.19373202 | -2.67427485 | 11.87863636 |
| C | -0.71912604 | -4.10299006 | 11.87869420 |
| C | 0.71912395  | -4.10299049 | 11.87863636 |
| C | 4.10768351  | -0.72341523 | 10.62495408 |
| C | 4.10768457  | 0.72341406  | 10.62492861 |
| C | 2.68033772  | 3.19565065  | 10.62495408 |
| C | 1.42734733  | 3.91906622  | 10.62492861 |
| C | -1.42734579 | 3.91906588  | 10.62495408 |

|   |             |             |             |
|---|-------------|-------------|-------------|
| C | -2.68033724 | 3.19565216  | 10.62492861 |
| C | -4.10768351 | 0.72341523  | 10.62495408 |
| C | -4.10768457 | -0.72341406 | 10.62492861 |
| C | -2.68033772 | -3.19565065 | 10.62495408 |
| C | -1.42734733 | -3.91906622 | 10.62492861 |
| C | 1.42734579  | -3.91906588 | 10.62495408 |
| C | 2.68033724  | -3.19565216 | 10.62492861 |
| C | 3.92226914  | 1.42710707  | 9.37983988  |
| C | 3.19704698  | 2.68323061  | 9.37984373  |
| C | 0.72522360  | 4.11033825  | 9.37983988  |
| C | -0.72522238 | 4.11033920  | 9.37984373  |
| C | -3.19704554 | 2.68323118  | 9.37983988  |
| C | -3.92226936 | 1.42710860  | 9.37984373  |
| C | -3.92226914 | -1.42710707 | 9.37983988  |
| C | -3.19704698 | -2.68323061 | 9.37984373  |
| C | -0.72522360 | -4.11033825 | 9.37983988  |
| C | 0.72522238  | -4.11033920 | 9.37984373  |
| C | 3.19704554  | -2.68323118 | 9.37983988  |
| C | 3.92226936  | -1.42710860 | 9.37984373  |
| C | 2.67576221  | 3.19431490  | 8.12924141  |
| C | 1.42847625  | 3.91443713  | 8.12926317  |
| C | -1.42847675 | 3.91443550  | 8.12924141  |
| C | -2.67576387 | 3.19431528  | 8.12926317  |
| C | -4.10423896 | 0.72012060  | 8.12924141  |
| C | -4.10424012 | -0.72012185 | 8.12926317  |
| C | -2.67576221 | -3.19431490 | 8.12924141  |
| C | -1.42847625 | -3.91443713 | 8.12926317  |
| C | 1.42847675  | -3.91443550 | 8.12924141  |
| C | 2.67576387  | -3.19431528 | 8.12926317  |
| C | 4.10423896  | -0.72012060 | 8.12924141  |
| C | 4.10424012  | 0.72012185  | 8.12926317  |
| C | 0.72248410  | 4.10615801  | 6.87473370  |
| C | -0.72248557 | 4.10615795  | 6.87475931  |
| C | -3.19479510 | 2.67876859  | 6.87473370  |
| C | -3.91727988 | 1.42738811  | 6.87475931  |
| C | -3.91727920 | -1.42738942 | 6.87473370  |
| C | -3.19479431 | -2.67876983 | 6.87475931  |
| C | -0.72248410 | -4.10615801 | 6.87473370  |
| C | 0.72248557  | -4.10615795 | 6.87475931  |
| C | 3.19479510  | -2.67876859 | 6.87473370  |
| C | 3.91727988  | -1.42738811 | 6.87475931  |
| C | 3.91727920  | 1.42738942  | 6.87473370  |
| C | 3.19479431  | 2.67876983  | 6.87475931  |
| C | -1.42657403 | 3.92115040  | 5.62807609  |
| C | -2.68253148 | 3.19602080  | 5.62809563  |
| C | -4.10910287 | 0.72512585  | 5.62807609  |
| C | -4.10910095 | -0.72513001 | 5.62809563  |
| C | -2.68252884 | -3.19602455 | 5.62807609  |
| C | -1.42656947 | -3.92115081 | 5.62809563  |
| C | 1.42657403  | -3.92115040 | 5.62807609  |
| C | 2.68253148  | -3.19602080 | 5.62809563  |
| C | 4.10910287  | -0.72512585 | 5.62807609  |
| C | 4.10910095  | 0.72513001  | 5.62809563  |
| C | 2.68252884  | 3.19602455  | 5.62807609  |
| C | 1.42656947  | 3.92115081  | 5.62809563  |
| C | -3.19367078 | 2.67609463  | 4.37820410  |
| C | -3.91440159 | 1.42775098  | 4.37821486  |
| C | -3.91440132 | -1.42775271 | 4.37820410  |
| C | -3.19366941 | -2.67609572 | 4.37821486  |
| C | -0.72073054 | -4.10384734 | 4.37820410  |
| C | 0.72073217  | -4.10384671 | 4.37821486  |
| C | 3.19367078  | -2.67609463 | 4.37820410  |
| C | 3.91440159  | -1.42775098 | 4.37821486  |
| C | 3.91440132  | 1.42775271  | 4.37820410  |
| C | 3.19366941  | 2.67609572  | 4.37821486  |
| C | 0.72073054  | 4.10384734  | 4.37820410  |
| C | -0.72073217 | 4.10384671  | 4.37821486  |
| C | -4.10538823 | 0.72185044  | 3.12346262  |
| C | -4.10538726 | -0.72185052 | 3.12347425  |
| C | -2.67783494 | -3.19444528 | 3.12346262  |

|   |             |             |             |
|---|-------------|-------------|-------------|
| C | -1.42755274 | -3.91629492 | 3.12347425  |
| C | 1.42755329  | -3.91629572 | 3.12346262  |
| C | 2.67783452  | -3.19444440 | 3.12347425  |
| C | 4.10538823  | -0.72185044 | 3.12346262  |
| C | 4.10538726  | 0.72185052  | 3.12347425  |
| C | 2.67783494  | 3.19444528  | 3.12346262  |
| C | 1.42755274  | 3.91629492  | 3.12347425  |
| C | -1.42755329 | 3.91629572  | 3.12346262  |
| C | -2.67783452 | 3.19444440  | 3.12347425  |
| C | -3.92146599 | -1.42667979 | 1.87583712  |
| C | -3.19627362 | -2.68274777 | 1.87585605  |
| C | -0.72519205 | -4.10942906 | 1.87583712  |
| C | 0.72519091  | -4.10942803 | 1.87585605  |
| C | 3.19627394  | -2.68274927 | 1.87583712  |
| C | 3.92146453  | -1.42668027 | 1.87585605  |
| C | 3.92146599  | 1.42667979  | 1.87583712  |
| C | 3.19627362  | 2.68274777  | 1.87585605  |
| C | 0.72519205  | 4.10942906  | 1.87583712  |
| C | -0.72519091 | 4.10942803  | 1.87585605  |
| C | -3.19627394 | 2.68274927  | 1.87583712  |
| C | -3.92146453 | 1.42668027  | 1.87585605  |
| C | -2.67670814 | -3.19379429 | 0.62743377  |
| C | -1.42755420 | -3.91499545 | 0.62745877  |
| C | 1.42755292  | -3.91499440 | 0.62743377  |
| C | 2.67670842  | -3.19379593 | 0.62745877  |
| C | 4.10426107  | -0.72120010 | 0.62743377  |
| C | 4.10426262  | 0.72119953  | 0.62745877  |
| C | 2.67670814  | 3.19379429  | 0.62743377  |
| C | 1.42755420  | 3.91499545  | 0.62745877  |
| C | -1.42755292 | 3.91499440  | 0.62743377  |
| C | -2.67670842 | 3.19379593  | 0.62745877  |
| C | -4.10426107 | 0.72120010  | 0.62743377  |
| C | -4.10426262 | -0.72119953 | 0.62745877  |
| C | -0.72119953 | -4.10426262 | -0.62745877 |
| C | 0.72120010  | -4.10426107 | -0.62743377 |
| C | 3.19379593  | -2.67670842 | -0.62745877 |
| C | 3.91499440  | -1.42755292 | -0.62743377 |
| C | 3.91499545  | 1.42755420  | -0.62745877 |
| C | 3.19379429  | 2.67670814  | -0.62743377 |
| C | 0.72119953  | 4.10426262  | -0.62745877 |
| C | -0.72120010 | 4.10426107  | -0.62743377 |
| C | -3.19379593 | 2.67670842  | -0.62745877 |
| C | -3.91499440 | 1.42755292  | -0.62743377 |
| C | -3.91499545 | -1.42755420 | -0.62745877 |
| C | -3.19379429 | -2.67670814 | -0.62743377 |
| C | 1.42668027  | -3.92146453 | -1.87585605 |
| C | 2.68274927  | -3.19627394 | -1.87583712 |
| C | 4.10942803  | -0.72519091 | -1.87585605 |
| C | 4.10942906  | 0.72519205  | -1.87583712 |
| C | 2.68274777  | 3.19627362  | -1.87585605 |
| C | 1.42667979  | 3.92146599  | -1.87583712 |
| C | -1.42668027 | 3.92146453  | -1.87585605 |
| C | -2.68274927 | 3.19627394  | -1.87583712 |
| C | -4.10942803 | 0.72519091  | -1.87585605 |
| C | -4.10942906 | -0.72519205 | -1.87583712 |
| C | -2.68274777 | -3.19627362 | -1.87585605 |
| C | -1.42667979 | -3.92146599 | -1.87583712 |
| C | 3.19444440  | -2.67783452 | -3.12347425 |
| C | 3.91629572  | -1.42755329 | -3.12346262 |
| C | 3.91629492  | 1.42755274  | -3.12347425 |
| C | 3.19444528  | 2.67783494  | -3.12346262 |
| C | 0.72185052  | 4.10538726  | -3.12347425 |
| C | -0.72185044 | 4.10538823  | -3.12346262 |
| C | -3.19444440 | 2.67783452  | -3.12347425 |
| C | -3.91629572 | 1.42755329  | -3.12346262 |
| C | -3.91629492 | -1.42755274 | -3.12347425 |
| C | -3.19444528 | -2.67783494 | -3.12346262 |
| C | -0.72185052 | -4.10538726 | -3.12347425 |
| C | 0.72185044  | -4.10538823 | -3.12346262 |
| C | 4.10384671  | -0.72073217 | -4.37821486 |

|   |             |             |              |
|---|-------------|-------------|--------------|
| C | 4.10384734  | 0.72073054  | -4.37820410  |
| C | 2.67609572  | 3.19366941  | -4.37821486  |
| C | 1.42775271  | 3.91440132  | -4.37820410  |
| C | -1.42775098 | 3.91440159  | -4.37821486  |
| C | -2.67609463 | 3.19367078  | -4.37820410  |
| C | -4.10384671 | 0.72073217  | -4.37821486  |
| C | -4.10384734 | -0.72073054 | -4.37820410  |
| C | -2.67609572 | -3.19366941 | -4.37821486  |
| C | -1.42775271 | -3.91440132 | -4.37820410  |
| C | 1.42775098  | -3.91440159 | -4.37821486  |
| C | 2.67609463  | -3.19367078 | -4.37820410  |
| C | 3.92115081  | 1.42656947  | -5.62809563  |
| C | 3.19602455  | 2.68252884  | -5.62807609  |
| C | 0.72513001  | 4.10910095  | -5.62809563  |
| C | -0.72512585 | 4.10910287  | -5.62807609  |
| C | -3.19602080 | 2.68253148  | -5.62809563  |
| C | -3.92115040 | 1.42657403  | -5.62807609  |
| C | -3.92115081 | -1.42656947 | -5.62809563  |
| C | -3.19602455 | -2.68252884 | -5.62807609  |
| C | -0.72513001 | -4.10910095 | -5.62809563  |
| C | 0.72512585  | -4.10910287 | -5.62807609  |
| C | 3.19602080  | -2.68253148 | -5.62809563  |
| C | 3.92115040  | -1.42657403 | -5.62807609  |
| C | 2.67876983  | 3.19479431  | -6.87475931  |
| C | 1.42738942  | 3.91727920  | -6.87473370  |
| C | -1.42738811 | 3.91727988  | -6.87475931  |
| C | -2.67876859 | 3.19479510  | -6.87473370  |
| C | -4.10615795 | 0.72248557  | -6.87475931  |
| C | -4.10615801 | -0.72248410 | -6.87473370  |
| C | -2.67876983 | -3.19479431 | -6.87475931  |
| C | -1.42738942 | -3.91727920 | -6.87473370  |
| C | 1.42738811  | -3.91727988 | -6.87475931  |
| C | 2.67876859  | -3.19479510 | -6.87473370  |
| C | 4.10615795  | -0.72248557 | -6.87475931  |
| C | 4.10615801  | 0.72248410  | -6.87473370  |
| C | 0.72012185  | 4.10424012  | -8.12926317  |
| C | -0.72012060 | 4.10423896  | -8.12924141  |
| C | -3.19431528 | 2.67576387  | -8.12926317  |
| C | -3.91443550 | 1.42847675  | -8.12924141  |
| C | -3.91443713 | -1.42847625 | -8.12926317  |
| C | -3.19431490 | -2.67576221 | -8.12924141  |
| C | -0.72012185 | -4.10424012 | -8.12926317  |
| C | 0.72012060  | -4.10423896 | -8.12924141  |
| C | 3.19431528  | -2.67576387 | -8.12926317  |
| C | 3.91443550  | -1.42847675 | -8.12924141  |
| C | 3.91443713  | 1.42847625  | -8.12926317  |
| C | 3.19431490  | 2.67576221  | -8.12924141  |
| C | -1.42710860 | 3.92226936  | -9.37984373  |
| C | -2.68323118 | 3.19704554  | -9.37983988  |
| C | -4.11033920 | 0.72522238  | -9.37984373  |
| C | -4.11033825 | -0.72522360 | -9.37983988  |
| C | -2.68323061 | -3.19704698 | -9.37984373  |
| C | -1.42710707 | -3.92226914 | -9.37983988  |
| C | 1.42710860  | -3.92226936 | -9.37984373  |
| C | 2.68323118  | -3.19704554 | -9.37983988  |
| C | 4.11033920  | -0.72522238 | -9.37984373  |
| C | 4.11033825  | 0.72522360  | -9.37983988  |
| C | 2.68323061  | 3.19704698  | -9.37984373  |
| C | 1.42710707  | 3.92226914  | -9.37983988  |
| C | -3.19565216 | 2.68033724  | -10.62492861 |
| C | -3.91906588 | 1.42734579  | -10.62495408 |
| C | -3.91906622 | -1.42734733 | -10.62492861 |
| C | -3.19565065 | -2.68033772 | -10.62495408 |
| C | -0.72341406 | -4.10768457 | -10.62492861 |
| C | 0.72341523  | -4.10768351 | -10.62495408 |
| C | 3.19565216  | -2.68033724 | -10.62492861 |
| C | 3.91906588  | -1.42734579 | -10.62495408 |
| C | 3.91906622  | 1.42734733  | -10.62492861 |
| C | 3.19565065  | 2.68033772  | -10.62495408 |
| C | 0.72341406  | 4.10768457  | -10.62492861 |



|   |             |             |              |
|---|-------------|-------------|--------------|
| C | -0.72341523 | 4.10768351  | -10.62495408 |
| C | -4.10299049 | 0.71912395  | -11.87863636 |
| C | -4.10299006 | -0.71912604 | -11.87869420 |
| C | -2.67427485 | -3.19373202 | -11.87863636 |
| C | -1.42871361 | -3.91285664 | -11.87869420 |
| C | 1.42871563  | -3.91285597 | -11.87863636 |
| C | 2.67427645  | -3.19373060 | -11.87869420 |
| C | 4.10299049  | -0.71912395 | -11.87863636 |
| C | 4.10299006  | 0.71912604  | -11.87869420 |
| C | 2.67427485  | 3.19373202  | -11.87863636 |
| C | 1.42871361  | 3.91285664  | -11.87869420 |
| C | -1.42871563 | 3.91285597  | -11.87863636 |
| C | -2.67427645 | 3.19373060  | -11.87869420 |
| C | -3.92062901 | -1.42651241 | -13.13142569 |
| C | -3.19571008 | -2.68210978 | -13.13151028 |
| C | -0.72491852 | -4.10862053 | -13.13142569 |
| C | 0.72492016  | -4.10862100 | -13.13151028 |
| C | 3.19571049  | -2.68210812 | -13.13142569 |
| C | 3.92063024  | -1.42651123 | -13.13151028 |
| C | 3.92062901  | 1.42651241  | -13.13142569 |
| C | 3.19571008  | 2.68210978  | -13.13151028 |
| C | 0.72491852  | 4.10862053  | -13.13142569 |
| C | -0.72492016 | 4.10862100  | -13.13151028 |
| C | -3.19571049 | 2.68210812  | -13.13142569 |
| C | -3.92063024 | 1.42651123  | -13.13151028 |
| C | -2.67912720 | -3.19214047 | -14.37459805 |
| C | -1.42491909 | -3.91625882 | -14.37467558 |
| C | 1.42491114  | -3.91626245 | -14.37459805 |
| C | 2.67912008  | -3.19214554 | -14.37467558 |
| C | 4.10403834  | -0.72412198 | -14.37459805 |
| C | 4.10403917  | 0.72411328  | -14.37467558 |
| C | 2.67912720  | 3.19214047  | -14.37459805 |
| C | 1.42491909  | 3.91625882  | -14.37467558 |
| C | -1.42491114 | 3.91626245  | -14.37459805 |
| C | -2.67912008 | 3.19214554  | -14.37467558 |
| C | -4.10403834 | 0.72412198  | -14.37459805 |
| C | -4.10403917 | -0.72411328 | -14.37467558 |
| C | -0.71528684 | -4.08793461 | -15.62786033 |
| C | 0.71528174  | -4.08793472 | -15.62790328 |
| C | 3.18261180  | -2.66342388 | -15.62786033 |
| C | 3.89789619  | -1.42451520 | -15.62790328 |
| C | 3.89789865  | 1.42451073  | -15.62786033 |
| C | 3.18261445  | 2.66341952  | -15.62790328 |
| C | 0.71528684  | 4.08793461  | -15.62786033 |
| C | -0.71528174 | 4.08793472  | -15.62790328 |
| C | -3.18261180 | 2.66342388  | -15.62786033 |
| C | -3.89789619 | 1.42451520  | -15.62790328 |
| C | -3.89789865 | -1.42451073 | -15.62786033 |
| C | -3.18261445 | -2.66341952 | -15.62790328 |
| C | 1.42027835  | -3.91197743 | -16.88912633 |
| C | 2.67773041  | -3.18598958 | -16.88914285 |
| C | 4.09801101  | -0.72599158 | -16.88912633 |
| C | 4.09801312  | 0.72598777  | -16.88914285 |
| C | 2.67773265  | 3.18598585  | -16.88912633 |
| C | 1.42028271  | 3.91197735  | -16.88914285 |
| C | -1.42027835 | 3.91197743  | -16.88912633 |
| C | -2.67773041 | 3.18598958  | -16.88914285 |
| C | -4.09801101 | 0.72599158  | -16.88912633 |
| C | -4.09801312 | -0.72598777 | -16.88914285 |
| C | -2.67773265 | -3.18598585 | -16.88912633 |
| C | -1.42028271 | -3.91197735 | -16.88914285 |
| C | 3.22458544  | -2.71048057 | -18.12902220 |
| C | 3.95963852  | -1.43733447 | -18.12902758 |
| C | 3.95963775  | 1.43733262  | -18.12902220 |
| C | 3.22458742  | 2.71048032  | -18.12902758 |
| C | 0.73505231  | 4.14781319  | -18.12902220 |
| C | -0.73505110 | 4.14781479  | -18.12902758 |
| C | -3.22458544 | 2.71048057  | -18.12902220 |
| C | -3.95963852 | 1.43733447  | -18.12902758 |
| C | -3.95963775 | -1.43733262 | -18.12902220 |

|   |             |             |              |
|---|-------------|-------------|--------------|
| C | -3.22458742 | -2.71048032 | -18.12902758 |
| C | -0.73505231 | -4.14781319 | -18.12902220 |
| C | 0.73505110  | -4.14781479 | -18.12902758 |
| C | 4.21267671  | -0.69207271 | -19.34418685 |
| C | 4.21267734  | 0.69207360  | -19.34419138 |
| C | 2.70569091  | 3.30224870  | -19.34418685 |
| C | 1.50698535  | 3.99432239  | -19.34419138 |
| C | -1.50698581 | 3.99432141  | -19.34418685 |
| C | -2.70569199 | 3.30224879  | -19.34419138 |
| C | -4.21267671 | 0.69207271  | -19.34418685 |
| C | -4.21267734 | -0.69207360 | -19.34419138 |
| C | -2.70569091 | -3.30224870 | -19.34418685 |
| C | -1.50698535 | -3.99432239 | -19.34419138 |
| C | 1.50698581  | -3.99432141 | -19.34418685 |
| C | 2.70569199  | -3.30224879 | -19.34419138 |
| H | -3.08978993 | 3.20137702  | 20.30003959  |
| H | -4.31737263 | 1.07514861  | 20.30004176  |
| H | -4.31736879 | -1.07514806 | 20.30003959  |
| H | -3.08979233 | -3.20138007 | 20.30004176  |
| H | -1.22757887 | -4.27652508 | 20.30003959  |
| H | 1.22758030  | -4.27652868 | 20.30004176  |
| H | 3.08978993  | -3.20137702 | 20.30003959  |
| H | 4.31737263  | -1.07514861 | 20.30004176  |
| H | 4.31736879  | 1.07514806  | 20.30003959  |
| H | 3.08979233  | 3.20138007  | 20.30004176  |
| H | 1.22757887  | 4.27652508  | 20.30003959  |
| H | -1.22758030 | 4.27652868  | 20.30004176  |
| H | 4.27652868  | -1.22758030 | -20.30004176 |
| H | 4.27652508  | 1.22757887  | -20.30003959 |
| H | 3.20138007  | 3.08979233  | -20.30004176 |
| H | 1.07514806  | 4.31736879  | -20.30003959 |
| H | -1.07514861 | 4.31737263  | -20.30004176 |
| H | -3.20137702 | 3.08978993  | -20.30003959 |
| H | -4.27652868 | 1.22758030  | -20.30004176 |
| H | -4.27652508 | -1.22757887 | -20.30003959 |
| H | -3.20138007 | -3.08979233 | -20.30004176 |
| H | -1.07514806 | -4.31736879 | -20.30003959 |
| H | 1.07514861  | -4.31737263 | -20.30004176 |
| H | 3.20137702  | -3.08978993 | -20.30003959 |

Nanotube (6,6) ul6v6s  
B3LYP/STO-3G Energy: -14922.533689

|   |             |             |              |
|---|-------------|-------------|--------------|
| C | -3.46656405 | 2.48918293  | -19.97762494 |
| C | -2.48918293 | 3.46656405  | -19.97762494 |
| C | 0.42241363  | 4.24672399  | -19.97762494 |
| C | 1.75754106  | 3.88897767  | -19.97762494 |
| C | 3.88897767  | 1.75754106  | -19.97762494 |
| C | 4.24672399  | 0.42241363  | -19.97762494 |
| C | 3.46656405  | -2.48918293 | -19.97762494 |
| C | 2.48918293  | -3.46656405 | -19.97762494 |
| C | -0.42241363 | -4.24672399 | -19.97762494 |
| C | -1.75754106 | -3.88897767 | -19.97762494 |
| C | -3.88897767 | -1.75754106 | -19.97762494 |
| C | -4.24672399 | -0.42241363 | -19.97762494 |
| C | -1.78131114 | 3.81427864  | -18.76068703 |
| C | -0.36447862 | 4.19391777  | -18.76068703 |
| C | 2.41260663  | 3.44980002  | -18.76068703 |
| C | 3.44980002  | 2.41260663  | -18.76068703 |
| C | 4.19391777  | -0.36447862 | -18.76068703 |
| C | 3.81427864  | -1.78131114 | -18.76068703 |
| C | 1.78131114  | -3.81427864 | -18.76068703 |
| C | 0.36447862  | -4.19391777 | -18.76068703 |
| C | -2.41260663 | -3.44980002 | -18.76068703 |
| C | -3.44980002 | -2.41260663 | -18.76068703 |
| C | -4.19391777 | 0.36447862  | -18.76068703 |
| C | -3.81427864 | 1.78131114  | -18.76068703 |
| C | 0.35907394  | 4.14667509  | -17.52030330 |

|   |             |             |              |
|---|-------------|-------------|--------------|
| C | 1.76237039  | 3.77066294  | -17.52030330 |
| C | 3.77066294  | 1.76237039  | -17.52030330 |
| C | 4.14667509  | 0.35907394  | -17.52030330 |
| C | 3.41158900  | -2.38430470 | -17.52030330 |
| C | 2.38430470  | -3.41158900 | -17.52030330 |
| C | -0.35907394 | -4.14667509 | -17.52030330 |
| C | -1.76237039 | -3.77066294 | -17.52030330 |
| C | -3.77066294 | -1.76237039 | -17.52030330 |
| C | -4.14667509 | -0.35907394 | -17.52030330 |
| C | -3.41158900 | 2.38430470  | -17.52030330 |
| C | -2.38430470 | 3.41158900  | -17.52030330 |
| C | 2.38436970  | 3.39524125  | -16.26043818 |
| C | 3.39524125  | 2.38436970  | -16.26043818 |
| C | 4.13255003  | -0.36730411 | -16.26043818 |
| C | 3.76254536  | -1.74818032 | -16.26043818 |
| C | 1.74818032  | -3.76254536 | -16.26043818 |
| C | 0.36730411  | -4.13255003 | -16.26043818 |
| C | -2.38436970 | -3.39524125 | -16.26043818 |
| C | -3.39524125 | -2.38436970 | -16.26043818 |
| C | -4.13255003 | 0.36730411  | -16.26043818 |
| C | -3.76254536 | 1.74818032  | -16.26043818 |
| C | -1.74818032 | 3.76254536  | -16.26043818 |
| C | -0.36730411 | 4.13255003  | -16.26043818 |
| C | 3.77454302  | 1.75916948  | -15.00523521 |
| C | 4.14843488  | 0.36378605  | -15.00523521 |
| C | 3.41075697  | -2.38926540 | -15.00523521 |
| C | 2.38926540  | -3.41075697 | -15.00523521 |
| C | -0.36378605 | -4.14843488 | -15.00523521 |
| C | -1.75916948 | -3.77454302 | -15.00523521 |
| C | -3.77454302 | -1.75916948 | -15.00523521 |
| C | -4.14843488 | -0.36378605 | -15.00523521 |
| C | -3.41075697 | 2.38926540  | -15.00523521 |
| C | -2.38926540 | 3.41075697  | -15.00523521 |
| C | 0.36378605  | 4.14843488  | -15.00523521 |
| C | 1.75916948  | 3.77454302  | -15.00523521 |
| C | 4.15579049  | -0.36285673 | -13.76097901 |
| C | 3.78044850  | -1.76365210 | -13.76097901 |
| C | 1.76365210  | -3.78044850 | -13.76097901 |
| C | 0.36285673  | -4.15579049 | -13.76097901 |
| C | -2.39213839 | -3.41759177 | -13.76097901 |
| C | -3.41759177 | -2.39213839 | -13.76097901 |
| C | -4.15579049 | 0.36285673  | -13.76097901 |
| C | -3.78044850 | 1.76365210  | -13.76097901 |
| C | -1.76365210 | 3.78044850  | -13.76097901 |
| C | -0.36285673 | 4.15579049  | -13.76097901 |
| C | 2.39213839  | 3.41759177  | -13.76097901 |
| C | 3.41759177  | 2.39213839  | -13.76097901 |
| C | 3.40889523  | -2.39212050 | -12.51005159 |
| C | 2.39212050  | -3.40889523 | -12.51005159 |
| C | -0.36718951 | -4.14825012 | -12.51005159 |
| C | -1.75612962 | -3.77608474 | -12.51005159 |
| C | -3.77608474 | -1.75612962 | -12.51005159 |
| C | -4.14825012 | -0.36718951 | -12.51005159 |
| C | -3.40889523 | 2.39212050  | -12.51005159 |
| C | -2.39212050 | 3.40889523  | -12.51005159 |
| C | 0.36718951  | 4.14825012  | -12.51005159 |
| C | 1.75612962  | 3.77608474  | -12.51005159 |
| C | 3.77608474  | 1.75612962  | -12.51005159 |
| C | 4.14825012  | 0.36718951  | -12.51005159 |
| C | 1.75874524  | -3.77741806 | -11.25451949 |
| C | 0.36559097  | -4.15071262 | -11.25451949 |
| C | -2.39196738 | -3.41182709 | -11.25451949 |
| C | -3.41182709 | -2.39196738 | -11.25451949 |
| C | -4.15071262 | 0.36559097  | -11.25451949 |
| C | -3.77741806 | 1.75874524  | -11.25451949 |
| C | -1.75874524 | 3.77741806  | -11.25451949 |
| C | -0.36559097 | 4.15071262  | -11.25451949 |
| C | 2.39196738  | 3.41182709  | -11.25451949 |
| C | 3.41182709  | 2.39196738  | -11.25451949 |
| C | 4.15071262  | -0.36559097 | -11.25451949 |

|   |             |             |              |
|---|-------------|-------------|--------------|
| C | 3.77741806  | -1.75874524 | -11.25451949 |
| C | -0.36310655 | -4.15664790 | -10.00726538 |
| C | -1.76386446 | -3.78131595 | -10.00726538 |
| C | -3.78131595 | -1.76386446 | -10.00726538 |
| C | -4.15664790 | -0.36310655 | -10.00726538 |
| C | -3.41820941 | 2.39278344  | -10.00726538 |
| C | -2.39278344 | 3.41820941  | -10.00726538 |
| C | 0.36310655  | 4.15664790  | -10.00726538 |
| C | 1.76386446  | 3.78131595  | -10.00726538 |
| C | 3.78131595  | 1.76386446  | -10.00726538 |
| C | 4.15664790  | 0.36310655  | -10.00726538 |
| C | 3.41820941  | -2.39278344 | -10.00726538 |
| C | 2.39278344  | -3.41820941 | -10.00726538 |
| C | -2.39242158 | -3.41164394 | -8.75870306  |
| C | -3.41164394 | -2.39242158 | -8.75870306  |
| C | -4.15078111 | 0.36607589  | -8.75870306  |
| C | -3.77771983 | 1.75835953  | -8.75870306  |
| C | -1.75835953 | 3.77771983  | -8.75870306  |
| C | -0.36607589 | 4.15078111  | -8.75870306  |
| C | 2.39242158  | 3.41164394  | -8.75870306  |
| C | 3.41164394  | 2.39242158  | -8.75870306  |
| C | 4.15078111  | -0.36607589 | -8.75870306  |
| C | 3.77771983  | -1.75835953 | -8.75870306  |
| C | 1.75835953  | -3.77771983 | -8.75870306  |
| C | 0.36607589  | -4.15078111 | -8.75870306  |
| C | -3.77670660 | -1.75760848 | -7.50349825  |
| C | -4.14952810 | -0.36621971 | -7.50349825  |
| C | -3.41048689 | 2.39191962  | -7.50349825  |
| C | -2.39191962 | 3.41048689  | -7.50349825  |
| C | 0.36621971  | 4.14952810  | -7.50349825  |
| C | 1.75760848  | 3.77670660  | -7.50349825  |
| C | 3.77670660  | 1.75760848  | -7.50349825  |
| C | 4.14952810  | 0.36621971  | -7.50349825  |
| C | 3.41048689  | -2.39191962 | -7.50349825  |
| C | 2.39191962  | -3.41048689 | -7.50349825  |
| C | -0.36621971 | -4.14952810 | -7.50349825  |
| C | -1.75760848 | -3.77670660 | -7.50349825  |
| C | -4.15550186 | 0.36324813  | -6.25375211  |
| C | -3.78039424 | 1.76316882  | -6.25375211  |
| C | -1.76316882 | 3.78039424  | -6.25375211  |
| C | -0.36324813 | 4.15550186  | -6.25375211  |
| C | 2.39233304  | 3.41714611  | -6.25375211  |
| C | 3.41714611  | 2.39233304  | -6.25375211  |
| C | 4.15550186  | -0.36324813 | -6.25375211  |
| C | 3.78039424  | -1.76316882 | -6.25375211  |
| C | 1.76316882  | -3.78039424 | -6.25375211  |
| C | 0.36324813  | -4.15550186 | -6.25375211  |
| C | -2.39233304 | -3.41714611 | -6.25375211  |
| C | -3.41714611 | -2.39233304 | -6.25375211  |
| C | -3.41288059 | 2.39206332  | -5.00607787  |
| C | -2.39206332 | 3.41288059  | -5.00607787  |
| C | 0.36514731  | 4.15167295  | -5.00607787  |
| C | 1.75960963  | 3.77802790  | -5.00607787  |
| C | 3.77802790  | 1.75960963  | -5.00607787  |
| C | 4.15167295  | 0.36514731  | -5.00607787  |
| C | 3.41288059  | -2.39206332 | -5.00607787  |
| C | 2.39206332  | -3.41288059 | -5.00607787  |
| C | -0.36514731 | -4.15167295 | -5.00607787  |
| C | -1.75960963 | -3.77802790 | -5.00607787  |
| C | -3.77802790 | -1.75960963 | -5.00607787  |
| C | -4.15167295 | -0.36514731 | -5.00607787  |
| C | -1.75677229 | 3.77612831  | -3.75148251  |
| C | -0.36665472 | 4.14860919  | -3.75148251  |
| C | 2.39183689  | 3.40947359  | -3.75148251  |
| C | 3.40947359  | 2.39183689  | -3.75148251  |
| C | 4.14860919  | -0.36665472 | -3.75148251  |
| C | 3.77612831  | -1.75677229 | -3.75148251  |
| C | 1.75677229  | -3.77612831 | -3.75148251  |
| C | 0.36665472  | -4.14860919 | -3.75148251  |
| C | -2.39183689 | -3.40947359 | -3.75148251  |

|   |             |             |             |
|---|-------------|-------------|-------------|
| C | -3.40947359 | -2.39183689 | -3.75148251 |
| C | -4.14860919 | 0.36665472  | -3.75148251 |
| C | -3.77612831 | 1.75677229  | -3.75148251 |
| C | 0.36385175  | 4.15492487  | -2.49986070 |
| C | 1.76235758  | 3.78019636  | -2.49986070 |
| C | 3.78019636  | 1.76235758  | -2.49986070 |
| C | 4.15492487  | 0.36385175  | -2.49986070 |
| C | 3.41634462  | -2.39256729 | -2.49986070 |
| C | 2.39256729  | -3.41634462 | -2.49986070 |
| C | -0.36385175 | -4.15492487 | -2.49986070 |
| C | -1.76235758 | -3.78019636 | -2.49986070 |
| C | -3.78019636 | -1.76235758 | -2.49986070 |
| C | -4.15492487 | -0.36385175 | -2.49986070 |
| C | -3.41634462 | 2.39256729  | -2.49986070 |
| C | -2.39256729 | 3.41634462  | -2.49986070 |
| C | 2.39232212  | 3.41469697  | -1.25307481 |
| C | 3.41469697  | 2.39232212  | -1.25307481 |
| C | 4.15337538  | -0.36446324 | -1.25307481 |
| C | 3.77916021  | -1.76105326 | -1.25307481 |
| C | 1.76105326  | -3.77916021 | -1.25307481 |
| C | 0.36446324  | -4.15337538 | -1.25307481 |
| C | -2.39232212 | -3.41469697 | -1.25307481 |
| C | -3.41469697 | -2.39232212 | -1.25307481 |
| C | -4.15337538 | 0.36446324  | -1.25307481 |
| C | -3.77916021 | 1.76105326  | -1.25307481 |
| C | -1.76105326 | 3.77916021  | -1.25307481 |
| C | -0.36446324 | 4.15337538  | -1.25307481 |
| C | 3.77570559  | 1.75633737  | 0.00000000  |
| C | 4.14802565  | 0.36682001  | 0.00000000  |
| C | 3.40888558  | -2.39168827 | 0.00000000  |
| C | 2.39168827  | -3.40888558 | 0.00000000  |
| C | -0.36682001 | -4.14802565 | 0.00000000  |
| C | -1.75633737 | -3.77570559 | 0.00000000  |
| C | -3.77570559 | -1.75633737 | 0.00000000  |
| C | -4.14802565 | -0.36682001 | 0.00000000  |
| C | -3.40888558 | 2.39168827  | 0.00000000  |
| C | -2.39168827 | 3.40888558  | 0.00000000  |
| C | 0.36682001  | 4.14802565  | 0.00000000  |
| C | 1.75633737  | 3.77570559  | 0.00000000  |
| C | 4.15337538  | -0.36446324 | 1.25307481  |
| C | 3.77916021  | -1.76105326 | 1.25307481  |
| C | 1.76105326  | -3.77916021 | 1.25307481  |
| C | 0.36446324  | -4.15337538 | 1.25307481  |
| C | -2.39232212 | -3.41469697 | 1.25307481  |
| C | -3.41469697 | -2.39232212 | 1.25307481  |
| C | -4.15337538 | 0.36446324  | 1.25307481  |
| C | -3.77916021 | 1.76105326  | 1.25307481  |
| C | -1.76105326 | 3.77916021  | 1.25307481  |
| C | -0.36446324 | 4.15337538  | 1.25307481  |
| C | 2.39232212  | 3.41469697  | 1.25307481  |
| C | 3.41469697  | 2.39232212  | 1.25307481  |
| C | 3.41634462  | -2.39256729 | 2.49986070  |
| C | 2.39256729  | -3.41634462 | 2.49986070  |
| C | -0.36385175 | -4.15492487 | 2.49986070  |
| C | -1.76235758 | -3.78019636 | 2.49986070  |
| C | -3.78019636 | -1.76235758 | 2.49986070  |
| C | -4.15492487 | -0.36385175 | 2.49986070  |
| C | -3.41634462 | 2.39256729  | 2.49986070  |
| C | -2.39256729 | 3.41634462  | 2.49986070  |
| C | 0.36385175  | 4.15492487  | 2.49986070  |
| C | 1.76235758  | 3.78019636  | 2.49986070  |
| C | 3.78019636  | 1.76235758  | 2.49986070  |
| C | 4.15492487  | 0.36385175  | 2.49986070  |
| C | 1.75677229  | -3.77612831 | 3.75148251  |
| C | 0.36665472  | -4.14860919 | 3.75148251  |
| C | -2.39183689 | -3.40947359 | 3.75148251  |
| C | -3.40947359 | -2.39183689 | 3.75148251  |
| C | -4.14860919 | 0.36665472  | 3.75148251  |
| C | -3.77612831 | 1.75677229  | 3.75148251  |
| C | -1.75677229 | 3.77612831  | 3.75148251  |

|   |             |             |             |
|---|-------------|-------------|-------------|
| C | -0.36665472 | 4.14860919  | 3.75148251  |
| C | 2.39183689  | 3.40947359  | 3.75148251  |
| C | 3.40947359  | 2.39183689  | 3.75148251  |
| C | 4.14860919  | -0.36665472 | 3.75148251  |
| C | 3.77612831  | -1.75677229 | 3.75148251  |
| C | -0.36514731 | -4.15167295 | 5.00607787  |
| C | -1.75960963 | -3.77802790 | 5.00607787  |
| C | -3.77802790 | -1.75960963 | 5.00607787  |
| C | -4.15167295 | -0.36514731 | 5.00607787  |
| C | -3.41288059 | 2.39206332  | 5.00607787  |
| C | -2.39206332 | 3.41288059  | 5.00607787  |
| C | 0.36514731  | 4.15167295  | 5.00607787  |
| C | 1.75960963  | 3.77802790  | 5.00607787  |
| C | 3.77802790  | 1.75960963  | 5.00607787  |
| C | 4.15167295  | 0.36514731  | 5.00607787  |
| C | 3.41288059  | -2.39206332 | 5.00607787  |
| C | 2.39206332  | -3.41288059 | 5.00607787  |
| C | -2.39233304 | -3.41714611 | 6.25375211  |
| C | -3.41714611 | -2.39233304 | 6.25375211  |
| C | -4.15550186 | 0.36324813  | 6.25375211  |
| C | -3.78039424 | 1.76316882  | 6.25375211  |
| C | -1.76316882 | 3.78039424  | 6.25375211  |
| C | -0.36324813 | 4.15550186  | 6.25375211  |
| C | 2.39233304  | 3.41714611  | 6.25375211  |
| C | 3.41714611  | 2.39233304  | 6.25375211  |
| C | 4.15550186  | -0.36324813 | 6.25375211  |
| C | 3.78039424  | -1.76316882 | 6.25375211  |
| C | 1.76316882  | -3.78039424 | 6.25375211  |
| C | 0.36324813  | -4.15550186 | 6.25375211  |
| C | -3.77670660 | -1.75760848 | 7.50349825  |
| C | -4.14952810 | -0.36621971 | 7.50349825  |
| C | -3.41048689 | 2.39191962  | 7.50349825  |
| C | -2.39191962 | 3.41048689  | 7.50349825  |
| C | 0.36621971  | 4.14952810  | 7.50349825  |
| C | 1.75760848  | 3.77670660  | 7.50349825  |
| C | 3.77670660  | 1.75760848  | 7.50349825  |
| C | 4.14952810  | 0.36621971  | 7.50349825  |
| C | 3.41048689  | -2.39191962 | 7.50349825  |
| C | 2.39191962  | -3.41048689 | 7.50349825  |
| C | -0.36621971 | -4.14952810 | 7.50349825  |
| C | -1.75760848 | -3.77670660 | 7.50349825  |
| C | -4.15078111 | 0.36607589  | 8.75870306  |
| C | -3.77771983 | 1.75835953  | 8.75870306  |
| C | -1.75835953 | 3.77771983  | 8.75870306  |
| C | -0.36607589 | 4.15078111  | 8.75870306  |
| C | 2.39242158  | 3.41164394  | 8.75870306  |
| C | 3.41164394  | 2.39242158  | 8.75870306  |
| C | 4.15078111  | -0.36607589 | 8.75870306  |
| C | 3.77771983  | -1.75835953 | 8.75870306  |
| C | 1.75835953  | -3.77771983 | 8.75870306  |
| C | 0.36607589  | -4.15078111 | 8.75870306  |
| C | -2.39242158 | -3.41164394 | 8.75870306  |
| C | -3.41164394 | -2.39242158 | 8.75870306  |
| C | -3.41820941 | 2.39278344  | 10.00726538 |
| C | -2.39278344 | 3.41820941  | 10.00726538 |
| C | 0.36310655  | 4.15664790  | 10.00726538 |
| C | 1.76386446  | 3.78131595  | 10.00726538 |
| C | 3.78131595  | 1.76386446  | 10.00726538 |
| C | 4.15664790  | 0.36310655  | 10.00726538 |
| C | 3.41820941  | -2.39278344 | 10.00726538 |
| C | 2.39278344  | -3.41820941 | 10.00726538 |
| C | -0.36310655 | -4.15664790 | 10.00726538 |
| C | -1.76386446 | -3.78131595 | 10.00726538 |
| C | -3.78131595 | -1.76386446 | 10.00726538 |
| C | -4.15664790 | -0.36310655 | 10.00726538 |
| C | -1.75874524 | 3.77741806  | 11.25451949 |
| C | -0.36559097 | 4.15071262  | 11.25451949 |
| C | 2.39196738  | 3.41182709  | 11.25451949 |
| C | 3.41182709  | 2.39196738  | 11.25451949 |
| C | 4.15071262  | -0.36559097 | 11.25451949 |

|   |             |             |             |
|---|-------------|-------------|-------------|
| C | 3.77741806  | -1.75874524 | 11.25451949 |
| C | 1.75874524  | -3.77741806 | 11.25451949 |
| C | 0.36559097  | -4.15071262 | 11.25451949 |
| C | -2.39196738 | -3.41182709 | 11.25451949 |
| C | -3.41182709 | -2.39196738 | 11.25451949 |
| C | -4.15071262 | 0.36559097  | 11.25451949 |
| C | -3.77741806 | 1.75874524  | 11.25451949 |
| C | 0.36718951  | 4.14825012  | 12.51005159 |
| C | 1.75612962  | 3.77608474  | 12.51005159 |
| C | 3.77608474  | 1.75612962  | 12.51005159 |
| C | 4.14825012  | 0.36718951  | 12.51005159 |
| C | 3.40889523  | -2.39212050 | 12.51005159 |
| C | 2.39212050  | -3.40889523 | 12.51005159 |
| C | -0.36718951 | -4.14825012 | 12.51005159 |
| C | -1.75612962 | -3.77608474 | 12.51005159 |
| C | -3.77608474 | -1.75612962 | 12.51005159 |
| C | -4.14825012 | -0.36718951 | 12.51005159 |
| C | -3.40889523 | 2.39212050  | 12.51005159 |
| C | -2.39212050 | 3.40889523  | 12.51005159 |
| C | 2.39213839  | 3.41759177  | 13.76097901 |
| C | 3.41759177  | 2.39213839  | 13.76097901 |
| C | 4.15579049  | -0.36285673 | 13.76097901 |
| C | 3.78044850  | -1.76365210 | 13.76097901 |
| C | 1.76365210  | -3.78044850 | 13.76097901 |
| C | 0.36285673  | -4.15579049 | 13.76097901 |
| C | -2.39213839 | -3.41759177 | 13.76097901 |
| C | -3.41759177 | -2.39213839 | 13.76097901 |
| C | -4.15579049 | 0.36285673  | 13.76097901 |
| C | -3.78044850 | 1.76365210  | 13.76097901 |
| C | -1.76365210 | 3.78044850  | 13.76097901 |
| C | -0.36285673 | 4.15579049  | 13.76097901 |
| C | 3.77454302  | 1.75916948  | 15.00523521 |
| C | 4.14843488  | 0.36378605  | 15.00523521 |
| C | 3.41075697  | -2.38926540 | 15.00523521 |
| C | 2.38926540  | -3.41075697 | 15.00523521 |
| C | -0.36378605 | -4.14843488 | 15.00523521 |
| C | -1.75916948 | -3.77454302 | 15.00523521 |
| C | -3.77454302 | -1.75916948 | 15.00523521 |
| C | -4.14843488 | -0.36378605 | 15.00523521 |
| C | -3.41075697 | 2.38926540  | 15.00523521 |
| C | -2.38926540 | 3.41075697  | 15.00523521 |
| C | 0.36378605  | 4.14843488  | 15.00523521 |
| C | 1.75916948  | 3.77454302  | 15.00523521 |
| C | 4.13255003  | -0.36730411 | 16.26043818 |
| C | 3.76254536  | -1.74818032 | 16.26043818 |
| C | 1.74818032  | -3.76254536 | 16.26043818 |
| C | 0.36730411  | -4.13255003 | 16.26043818 |
| C | -2.38436970 | -3.39524125 | 16.26043818 |
| C | -3.39524125 | -2.38436970 | 16.26043818 |
| C | -4.13255003 | 0.36730411  | 16.26043818 |
| C | -3.76254536 | 1.74818032  | 16.26043818 |
| C | -1.74818032 | 3.76254536  | 16.26043818 |
| C | -0.36730411 | 4.13255003  | 16.26043818 |
| C | 2.38436970  | 3.39524125  | 16.26043818 |
| C | 3.39524125  | 2.38436970  | 16.26043818 |
| C | 3.41158900  | -2.38430470 | 17.52030330 |
| C | 2.38430470  | -3.41158900 | 17.52030330 |
| C | -0.35907394 | -4.14667509 | 17.52030330 |
| C | -1.76237039 | -3.77066294 | 17.52030330 |
| C | -3.77066294 | -1.76237039 | 17.52030330 |
| C | -4.14667509 | -0.35907394 | 17.52030330 |
| C | -3.41158900 | 2.38430470  | 17.52030330 |
| C | -2.38430470 | 3.41158900  | 17.52030330 |
| C | 0.35907394  | 4.14667509  | 17.52030330 |
| C | 1.76237039  | 3.77066294  | 17.52030330 |
| C | 3.77066294  | 1.76237039  | 17.52030330 |
| C | 4.14667509  | 0.35907394  | 17.52030330 |
| C | 1.78131114  | -3.81427864 | 18.76068703 |
| C | 0.36447862  | -4.19391777 | 18.76068703 |
| C | -2.41260663 | -3.44980002 | 18.76068703 |

|   |             |             |              |
|---|-------------|-------------|--------------|
| C | -3.44980002 | -2.41260663 | 18.76068703  |
| C | -4.19391777 | 0.36447862  | 18.76068703  |
| C | -3.81427864 | 1.78131114  | 18.76068703  |
| C | -1.78131114 | 3.81427864  | 18.76068703  |
| C | -0.36447862 | 4.19391777  | 18.76068703  |
| C | 2.41260663  | 3.44980002  | 18.76068703  |
| C | 3.44980002  | 2.41260663  | 18.76068703  |
| C | 4.19391777  | -0.36447862 | 18.76068703  |
| C | 3.81427864  | -1.78131114 | 18.76068703  |
| C | -0.42241363 | -4.24672399 | 19.97762494  |
| C | -1.75754106 | -3.88897767 | 19.97762494  |
| C | -3.88897767 | -1.75754106 | 19.97762494  |
| C | -4.24672399 | -0.42241363 | 19.97762494  |
| C | -3.46656405 | 2.48918293  | 19.97762494  |
| C | -2.48918293 | 3.46656405  | 19.97762494  |
| C | 0.42241363  | 4.24672399  | 19.97762494  |
| C | 1.75754106  | 3.88897767  | 19.97762494  |
| C | 3.88897767  | 1.75754106  | 19.97762494  |
| C | 4.24672399  | 0.42241363  | 19.97762494  |
| C | 3.46656405  | -2.48918293 | 19.97762494  |
| C | 2.48918293  | -3.46656405 | 19.97762494  |
| H | -3.89381402 | 2.15771596  | -20.93268363 |
| H | -2.15771596 | 3.89381402  | -20.93268363 |
| H | -0.07827018 | 4.45099984  | -20.93268363 |
| H | 2.29328388  | 3.81554384  | -20.93268363 |
| H | 3.81554384  | 2.29328388  | -20.93268363 |
| H | 4.45099984  | -0.07827018 | -20.93268363 |
| H | 3.89381402  | -2.15771596 | -20.93268363 |
| H | 2.15771596  | -3.89381402 | -20.93268363 |
| H | 0.07827018  | -4.45099984 | -20.93268363 |
| H | -2.29328388 | -3.81554384 | -20.93268363 |
| H | -3.81554384 | -2.29328388 | -20.93268363 |
| H | -4.45099984 | 0.07827018  | -20.93268363 |
| H | 0.07827018  | -4.45099984 | 20.93268363  |
| H | -2.29328388 | -3.81554384 | 20.93268363  |
| H | -3.81554384 | -2.29328388 | 20.93268363  |
| H | -4.45099984 | 0.07827018  | 20.93268363  |
| H | -3.89381402 | 2.15771596  | 20.93268363  |
| H | -2.15771596 | 3.89381402  | 20.93268363  |
| H | -0.07827018 | 4.45099984  | 20.93268363  |
| H | 2.29328388  | 3.81554384  | 20.93268363  |
| H | 3.81554384  | 2.29328388  | 20.93268363  |
| H | 4.45099984  | -0.07827018 | 20.93268363  |
| H | 3.89381402  | -2.15771596 | 20.93268363  |
| H | 2.15771596  | -3.89381402 | 20.93268363  |

Nanotube (6,6) u17v0s  
B3LYP/STO-3G Energy: -15374.313428

|   |             |             |              |
|---|-------------|-------------|--------------|
| C | -3.99637331 | 1.50686893  | -20.58564759 |
| C | -3.30317240 | 2.70752542  | -20.58568560 |
| C | -0.69319988 | 4.21439527  | -20.58564759 |
| C | 0.69319959  | 4.21439392  | -20.58568560 |
| C | 3.30317343  | 2.70752634  | -20.58564759 |
| C | 3.99637199  | 1.50686850  | -20.58568560 |
| C | 3.99637331  | -1.50686893 | -20.58564759 |
| C | 3.30317240  | -2.70752542 | -20.58568560 |
| C | 0.69319988  | -4.21439527 | -20.58564759 |
| C | -0.69319959 | -4.21439392 | -20.58568560 |
| C | -3.30317343 | -2.70752634 | -20.58564759 |
| C | -3.99637199 | -1.50686850 | -20.58568560 |
| C | -2.71384423 | 3.22672070  | -19.37294791 |
| C | -1.43749890 | 3.96361764  | -19.37298323 |
| C | 1.43749998  | 3.96361840  | -19.37294791 |
| C | 2.71384411  | 3.22671938  | -19.37298323 |
| C | 4.15134421  | 0.73689770  | -19.37294791 |
| C | 4.15134301  | -0.73689825 | -19.37298323 |
| C | 2.71384423  | -3.22672070 | -19.37294791 |



|   |             |             |              |
|---|-------------|-------------|--------------|
| C | 1.43749890  | -3.96361764 | -19.37298323 |
| C | -1.43749998 | -3.96361840 | -19.37294791 |
| C | -2.71384411 | -3.22671938 | -19.37298323 |
| C | -4.15134421 | -0.73689770 | -19.37294791 |
| C | -4.15134301 | 0.73689825  | -19.37298323 |
| C | -0.72555475 | 4.09847636  | -18.13319445 |
| C | 0.72555953  | 4.09847567  | -18.13320062 |
| C | 3.18660727  | 2.67758703  | -18.13319445 |
| C | 3.91216381  | 1.42088485  | -18.13320062 |
| C | 3.91216202  | -1.42088934 | -18.13319445 |
| C | 3.18660428  | -2.67759082 | -18.13320062 |
| C | 0.72555475  | -4.09847636 | -18.13319445 |
| C | -0.72555953 | -4.09847567 | -18.13320062 |
| C | -3.18660727 | -2.67758703 | -18.13319445 |
| C | -3.91216381 | -1.42088485 | -18.13320062 |
| C | -3.91216202 | 1.42088934  | -18.13319445 |
| C | -3.18660428 | 2.67759082  | -18.13320062 |
| C | 1.42455695  | 3.89986129  | -16.87067866 |
| C | 2.66510331  | 3.18363113  | -16.87064308 |
| C | 4.08965742  | 0.71622813  | -16.87067866 |
| C | 4.08965709  | -0.71623161 | -16.87064308 |
| C | 2.66510047  | -3.18363315 | -16.87067866 |
| C | 1.42455378  | -3.89986274 | -16.87064308 |
| C | -1.42455695 | -3.89986129 | -16.87067866 |
| C | -2.66510331 | -3.18363113 | -16.87064308 |
| C | -4.08965742 | -0.71622813 | -16.87067866 |
| C | -4.08965709 | 0.71623161  | -16.87064308 |
| C | -2.66510047 | 3.18363315  | -16.87067866 |
| C | -1.42455378 | 3.89986274  | -16.87064308 |
| C | 3.19399100  | 2.68235447  | -15.62015826 |
| C | 3.91998265  | 1.42490078  | -15.62009917 |
| C | 3.91998262  | -1.42490011 | -15.62015826 |
| C | 3.19399160  | -2.68235417 | -15.62009917 |
| C | 0.72599161  | -4.10725458 | -15.62015826 |
| C | -0.72599106 | -4.10725495 | -15.62009917 |
| C | -3.19399100 | -2.68235447 | -15.62015826 |
| C | -3.91998265 | -1.42490078 | -15.62009917 |
| C | -3.91998262 | 1.42490011  | -15.62015826 |
| C | -3.19399160 | 2.68235417  | -15.62009917 |
| C | -0.72599161 | 4.10725458  | -15.62015826 |
| C | 0.72599106  | 4.10725495  | -15.62009917 |
| C | 4.10852284  | 0.72427476  | -14.37733721 |
| C | 4.10852396  | -0.72426697 | -14.37729632 |
| C | 2.68150176  | -3.19594777 | -14.37733721 |
| C | 1.42702839  | -3.92021960 | -14.37729632 |
| C | -1.42702108 | -3.92022253 | -14.37733721 |
| C | -2.68149557 | -3.19595264 | -14.37729632 |
| C | -4.10852284 | -0.72427476 | -14.37733721 |
| C | -4.10852396 | 0.72426697  | -14.37729632 |
| C | -2.68150176 | 3.19594777  | -14.37733721 |
| C | -1.42702839 | 3.92021960  | -14.37729632 |
| C | 1.42702108  | 3.92022253  | -14.37733721 |
| C | 2.68149557  | 3.19595264  | -14.37729632 |
| C | 3.91443609  | -1.42876331 | -13.12267757 |
| C | 3.19456580  | -2.67561537 | -13.12267134 |
| C | 0.71987273  | -4.10438275 | -13.12267757 |
| C | -0.71986798 | -4.10438282 | -13.12267134 |
| C | -3.19456337 | -2.67561944 | -13.12267757 |
| C | -3.91443378 | -1.42876746 | -13.12267134 |
| C | -3.91443609 | 1.42876331  | -13.12267757 |
| C | -3.19456580 | 2.67561537  | -13.12267134 |
| C | -0.71987273 | 4.10438275  | -13.12267757 |
| C | 0.71986798  | 4.10438282  | -13.12267134 |
| C | 3.19456337  | 2.67561944  | -13.12267757 |
| C | 3.91443378  | 1.42876746  | -13.12267134 |
| C | 2.68356930  | -3.19702035 | -11.87152431 |
| C | 1.42691815  | -3.92254918 | -11.87153266 |
| C | -1.42691619 | -3.92254936 | -11.87152431 |
| C | -2.68356816 | -3.19702196 | -11.87153266 |
| C | -4.11048549 | -0.72552901 | -11.87152431 |

|   |             |             |              |
|---|-------------|-------------|--------------|
| C | -4.11048631 | 0.72552722  | -11.87153266 |
| C | -2.68356930 | 3.19702035  | -11.87152431 |
| C | -1.42691815 | 3.92254918  | -11.87153266 |
| C | 1.42691619  | 3.92254936  | -11.87152431 |
| C | 2.68356816  | 3.19702196  | -11.87153266 |
| C | 4.11048549  | 0.72552901  | -11.87152431 |
| C | 4.11048631  | -0.72552722 | -11.87153266 |
| C | 0.72438671  | -4.10898746 | -10.62697445 |
| C | -0.72438687 | -4.10898748 | -10.62697685 |
| C | -3.19629417 | -2.68183102 | -10.62697445 |
| C | -3.92068097 | -1.42715631 | -10.62697685 |
| C | -3.92068088 | 1.42715644  | -10.62697445 |
| C | -3.19629411 | 2.68183117  | -10.62697685 |
| C | -0.72438671 | 4.10898746  | -10.62697445 |
| C | 0.72438687  | 4.10898748  | -10.62697685 |
| C | 3.19629417  | 2.68183102  | -10.62697445 |
| C | 3.92068097  | 1.42715631  | -10.62697685 |
| C | 3.92068088  | -1.42715644 | -10.62697445 |
| C | 3.19629411  | -2.68183117 | -10.62697685 |
| C | -1.42851337 | -3.91541176 | -9.37380681  |
| C | -2.67658710 | -3.19483518 | -9.37380529  |
| C | -4.10510274 | -0.72057701 | -9.37380681  |
| C | -4.10510198 | 0.72057483  | -9.37380529  |
| C | -2.67658937 | 3.19483475  | -9.37380681  |
| C | -1.42851488 | 3.91541001  | -9.37380529  |
| C | 1.42851337  | 3.91541176  | -9.37380681  |
| C | 2.67658710  | 3.19483518  | -9.37380529  |
| C | 4.10510274  | 0.72057701  | -9.37380681  |
| C | 4.10510198  | -0.72057483 | -9.37380529  |
| C | 2.67658937  | -3.19483475 | -9.37380681  |
| C | 1.42851488  | -3.91541001 | -9.37380529  |
| C | -3.19716866 | -2.68308896 | -8.12240972  |
| C | -3.92220530 | -1.42729041 | -8.12242523  |
| C | -3.92220753 | 1.42728480  | -8.12240972  |
| C | -3.19717240 | 2.68308422  | -8.12242523  |
| C | -0.72503887 | 4.11037376  | -8.12240972  |
| C | 0.72503289  | 4.11037463  | -8.12242523  |
| C | 3.19716866  | 2.68308896  | -8.12240972  |
| C | 3.92220530  | 1.42729041  | -8.12242523  |
| C | 3.92220753  | -1.42728480 | -8.12240972  |
| C | 3.19717240  | -2.68308422 | -8.12242523  |
| C | 0.72503887  | -4.11037376 | -8.12240972  |
| C | -0.72503289 | -4.11037463 | -8.12242523  |
| C | -4.10913671 | -0.72441534 | -6.87719339  |
| C | -4.10913692 | 0.72441181  | -6.87723305  |
| C | -2.68193044 | 3.19640911  | -6.87719339  |
| C | -1.42720942 | 3.92082286  | -6.87723305  |
| C | 1.42720627  | 3.92082445  | -6.87719339  |
| C | 2.68192749  | 3.19641105  | -6.87723305  |
| C | 4.10913671  | 0.72441534  | -6.87719339  |
| C | 4.10913692  | -0.72441181 | -6.87723305  |
| C | 2.68193044  | -3.19640911 | -6.87719339  |
| C | 1.42720942  | -3.92082286 | -6.87723305  |
| C | -1.42720627 | -3.92082445 | -6.87719339  |
| C | -2.68192749 | -3.19641105 | -6.87723305  |
| C | -3.91522362 | 1.42809180  | -5.62438971  |
| C | -3.19437565 | 2.67663640  | -5.62443743  |
| C | -0.72084803 | 4.10472902  | -5.62438971  |
| C | 0.72084729  | 4.10472867  | -5.62443743  |
| C | 3.19437559  | 2.67663722  | -5.62438971  |
| C | 3.91522295  | 1.42809227  | -5.62443743  |
| C | 3.91522362  | -1.42809180 | -5.62438971  |
| C | 3.19437565  | -2.67663640 | -5.62443743  |
| C | 0.72084803  | -4.10472902 | -5.62438971  |
| C | -0.72084729 | -4.10472867 | -5.62443743  |
| C | -3.19437559 | -2.67663722 | -5.62438971  |
| C | -3.91522295 | -1.42809227 | -5.62443743  |
| C | -2.68243837 | 3.19664457  | -4.37248690  |
| C | -1.42715683 | 3.92138279  | -4.37252804  |
| C | 1.42715622  | 3.92138206  | -4.37248690  |

|   |             |             |             |
|---|-------------|-------------|-------------|
| C | 2.68243869  | 3.19664547  | -4.37252804 |
| C | 4.10959459  | 0.72473749  | -4.37248690 |
| C | 4.10959553  | -0.72473732 | -4.37252804 |
| C | 2.68243837  | -3.19664457 | -4.37248690 |
| C | 1.42715683  | -3.92138279 | -4.37252804 |
| C | -1.42715622 | -3.92138206 | -4.37248690 |
| C | -2.68243869 | -3.19664547 | -4.37252804 |
| C | -4.10959459 | -0.72473749 | -4.37248690 |
| C | -4.10959553 | 0.72473732  | -4.37252804 |
| C | -0.72448975 | 4.10948450  | -3.12686246 |
| C | 0.72448900  | 4.10948506  | -3.12689934 |
| C | 3.19667310  | 2.68216877  | -3.12686246 |
| C | 3.92116296  | 1.42731665  | -3.12689934 |
| C | 3.92116284  | -1.42731572 | -3.12686246 |
| C | 3.19667396  | -2.68216841 | -3.12689934 |
| C | 0.72448975  | -4.10948450 | -3.12686246 |
| C | -0.72448900 | -4.10948506 | -3.12689934 |
| C | -3.19667310 | -2.68216877 | -3.12686246 |
| C | -3.92116296 | -1.42731665 | -3.12689934 |
| C | -3.92116284 | 1.42731572  | -3.12686246 |
| C | -3.19667396 | 2.68216841  | -3.12689934 |
| C | 1.42823405  | 3.91569813  | -1.87464148 |
| C | 2.67697481  | 3.19473709  | -1.87468970 |
| C | 4.10521108  | 0.72096209  | -1.87464148 |
| C | 4.10521088  | -0.72095965 | -1.87468970 |
| C | 2.67697703  | -3.19473604 | -1.87464148 |
| C | 1.42823607  | -3.91569673 | -1.87468970 |
| C | -1.42823405 | -3.91569813 | -1.87464148 |
| C | -2.67697481 | -3.19473709 | -1.87468970 |
| C | -4.10521108 | -0.72096209 | -1.87464148 |
| C | -4.10521088 | 0.72095965  | -1.87468970 |
| C | -2.67697703 | 3.19473604  | -1.87464148 |
| C | -1.42823607 | 3.91569673  | -1.87468970 |
| C | 3.19649338  | 2.68211306  | -0.62269946 |
| C | 3.92102498  | 1.42719147  | -0.62276525 |
| C | 3.92102473  | -1.42718794 | -0.62269946 |
| C | 3.19649656  | -2.68211150 | -0.62276525 |
| C | 0.72453136  | -4.10930100 | -0.62269946 |
| C | -0.72452842 | -4.10930298 | -0.62276525 |
| C | -3.19649338 | -2.68211306 | -0.62269946 |
| C | -3.92102498 | -1.42719147 | -0.62276525 |
| C | -3.92102473 | 1.42718794  | -0.62269946 |
| C | -3.19649656 | 2.68211150  | -0.62276525 |
| C | -0.72453136 | 4.10930100  | -0.62269946 |
| C | 0.72452842  | 4.10930298  | -0.62276525 |
| C | 4.10930298  | 0.72452842  | 0.62276525  |
| C | 4.10930100  | -0.72453136 | 0.62269946  |
| C | 2.68211150  | -3.19649656 | 0.62276525  |
| C | 1.42718794  | -3.92102473 | 0.62269946  |
| C | -1.42719147 | -3.92102498 | 0.62276525  |
| C | -2.68211306 | -3.19649338 | 0.62269946  |
| C | -4.10930298 | -0.72452842 | 0.62276525  |
| C | -4.10930100 | 0.72453136  | 0.62269946  |
| C | -2.68211150 | 3.19649656  | 0.62276525  |
| C | -1.42718794 | 3.92102473  | 0.62269946  |
| C | 1.42719147  | 3.92102498  | 0.62276525  |
| C | 2.68211306  | 3.19649338  | 0.62269946  |
| C | 3.91569673  | -1.42823607 | 1.87468970  |
| C | 3.19473604  | -2.67697703 | 1.87464148  |
| C | 0.72095965  | -4.10521088 | 1.87468970  |
| C | -0.72096209 | -4.10521108 | 1.87464148  |
| C | -3.19473709 | -2.67697481 | 1.87468970  |
| C | -3.91569813 | -1.42823405 | 1.87464148  |
| C | -3.91569673 | 1.42823607  | 1.87468970  |
| C | -3.19473604 | 2.67697703  | 1.87464148  |
| C | -0.72095965 | 4.10521088  | 1.87468970  |
| C | 0.72096209  | 4.10521108  | 1.87464148  |
| C | 3.19473709  | 2.67697481  | 1.87468970  |
| C | 3.91569813  | 1.42823405  | 1.87464148  |
| C | 2.68216841  | -3.19667396 | 3.12689934  |

|   |             |             |            |
|---|-------------|-------------|------------|
| C | 1.42731572  | -3.92116284 | 3.12686246 |
| C | -1.42731665 | -3.92116296 | 3.12689934 |
| C | -2.68216877 | -3.19667310 | 3.12686246 |
| C | -4.10948506 | -0.72448900 | 3.12689934 |
| C | -4.10948450 | 0.72448975  | 3.12686246 |
| C | -2.68216841 | 3.19667396  | 3.12689934 |
| C | -1.42731572 | 3.92116284  | 3.12686246 |
| C | 1.42731665  | 3.92116296  | 3.12689934 |
| C | 2.68216877  | 3.19667310  | 3.12686246 |
| C | 4.10948506  | 0.72448900  | 3.12689934 |
| C | 4.10948450  | -0.72448975 | 3.12686246 |
| C | 0.72473732  | -4.10959553 | 4.37252804 |
| C | -0.72473749 | -4.10959459 | 4.37248690 |
| C | -3.19664547 | -2.68243869 | 4.37252804 |
| C | -3.92138206 | -1.42715622 | 4.37248690 |
| C | -3.92138279 | 1.42715683  | 4.37252804 |
| C | -3.19664457 | 2.68243837  | 4.37248690 |
| C | -0.72473732 | 4.10959553  | 4.37252804 |
| C | 0.72473749  | 4.10959459  | 4.37248690 |
| C | 3.19664547  | 2.68243869  | 4.37252804 |
| C | 3.92138206  | 1.42715622  | 4.37248690 |
| C | 3.92138279  | -1.42715683 | 4.37252804 |
| C | 3.19664457  | -2.68243837 | 4.37248690 |
| C | -1.42809227 | -3.91522295 | 5.62443743 |
| C | -2.67663722 | -3.19437559 | 5.62438971 |
| C | -4.10472867 | -0.72084729 | 5.62443743 |
| C | -4.10472902 | 0.72084803  | 5.62438971 |
| C | -2.67663640 | 3.19437565  | 5.62443743 |
| C | -1.42809180 | 3.91522362  | 5.62438971 |
| C | 1.42809227  | 3.91522295  | 5.62443743 |
| C | 2.67663722  | 3.19437559  | 5.62438971 |
| C | 4.10472867  | 0.72084729  | 5.62443743 |
| C | 4.10472902  | -0.72084803 | 5.62438971 |
| C | 2.67663640  | -3.19437565 | 5.62443743 |
| C | 1.42809180  | -3.91522362 | 5.62438971 |
| C | -3.19641105 | -2.68192749 | 6.87723305 |
| C | -3.92082445 | -1.42720627 | 6.87719339 |
| C | -3.92082286 | 1.42720942  | 6.87723305 |
| C | -3.19640911 | 2.68193044  | 6.87719339 |
| C | -0.72441181 | 4.10913692  | 6.87723305 |
| C | 0.72441534  | 4.10913671  | 6.87719339 |
| C | 3.19641105  | 2.68192749  | 6.87723305 |
| C | 3.92082445  | 1.42720627  | 6.87719339 |
| C | 3.92082286  | -1.42720942 | 6.87723305 |
| C | 3.19640911  | -2.68193044 | 6.87719339 |
| C | 0.72441181  | -4.10913692 | 6.87723305 |
| C | -0.72441534 | -4.10913671 | 6.87719339 |
| C | -4.11037463 | -0.72503289 | 8.12242523 |
| C | -4.11037376 | 0.72503887  | 8.12240972 |
| C | -2.68308422 | 3.19717240  | 8.12242523 |
| C | -1.42728480 | 3.92220753  | 8.12240972 |
| C | 1.42729041  | 3.92220530  | 8.12242523 |
| C | 2.68308896  | 3.19716866  | 8.12240972 |
| C | 4.11037463  | 0.72503289  | 8.12242523 |
| C | 4.11037376  | -0.72503887 | 8.12240972 |
| C | 2.68308422  | -3.19717240 | 8.12242523 |
| C | 1.42728480  | -3.92220753 | 8.12240972 |
| C | -1.42729041 | -3.92220530 | 8.12242523 |
| C | -2.68308896 | -3.19716866 | 8.12240972 |
| C | -3.91541001 | 1.42851488  | 9.37380529 |
| C | -3.19483475 | 2.67658937  | 9.37380681 |
| C | -0.72057483 | 4.10510198  | 9.37380529 |
| C | 0.72057701  | 4.10510274  | 9.37380681 |
| C | 3.19483518  | 2.67658710  | 9.37380529 |
| C | 3.91541176  | 1.42851337  | 9.37380681 |
| C | 3.91541001  | -1.42851488 | 9.37380529 |
| C | 3.19483475  | -2.67658937 | 9.37380681 |
| C | 0.72057483  | -4.10510198 | 9.37380529 |
| C | -0.72057701 | -4.10510274 | 9.37380681 |
| C | -3.19483518 | -2.67658710 | 9.37380529 |

|   |             |             |             |
|---|-------------|-------------|-------------|
| C | -3.91541176 | -1.42851337 | 9.37380681  |
| C | -2.68183117 | 3.19629411  | 10.62697685 |
| C | -1.42715644 | 3.92068088  | 10.62697445 |
| C | 1.42715631  | 3.92068097  | 10.62697685 |
| C | 2.68183102  | 3.19629417  | 10.62697445 |
| C | 4.10898748  | 0.72438687  | 10.62697685 |
| C | 4.10898746  | -0.72438671 | 10.62697445 |
| C | 2.68183117  | -3.19629411 | 10.62697685 |
| C | 1.42715644  | -3.92068088 | 10.62697445 |
| C | -1.42715631 | -3.92068097 | 10.62697685 |
| C | -2.68183102 | -3.19629417 | 10.62697445 |
| C | -4.10898748 | -0.72438687 | 10.62697685 |
| C | -4.10898746 | 0.72438671  | 10.62697445 |
| C | -0.72552722 | 4.11048631  | 11.87153266 |
| C | 0.72552901  | 4.11048549  | 11.87152431 |
| C | 3.19702196  | 2.68356816  | 11.87153266 |
| C | 3.92254936  | 1.42691619  | 11.87152431 |
| C | 3.92254918  | -1.42691815 | 11.87153266 |
| C | 3.19702035  | -2.68356930 | 11.87152431 |
| C | 0.72552722  | -4.11048631 | 11.87153266 |
| C | -0.72552901 | -4.11048549 | 11.87152431 |
| C | -3.19702196 | -2.68356816 | 11.87153266 |
| C | -3.92254936 | -1.42691619 | 11.87152431 |
| C | -3.92254918 | 1.42691815  | 11.87153266 |
| C | -3.19702035 | 2.68356930  | 11.87152431 |
| C | 1.42876746  | 3.91443378  | 13.12267134 |
| C | 2.67561944  | 3.19456337  | 13.12267757 |
| C | 4.10438282  | 0.71986798  | 13.12267134 |
| C | 4.10438275  | -0.71987273 | 13.12267757 |
| C | 2.67561537  | -3.19456580 | 13.12267134 |
| C | 1.42876331  | -3.91443609 | 13.12267757 |
| C | -1.42876746 | -3.91443378 | 13.12267134 |
| C | -2.67561944 | -3.19456337 | 13.12267757 |
| C | -4.10438282 | -0.71986798 | 13.12267134 |
| C | -4.10438275 | 0.71987273  | 13.12267757 |
| C | -2.67561537 | 3.19456580  | 13.12267134 |
| C | -1.42876331 | 3.91443609  | 13.12267757 |
| C | 3.19595264  | 2.68149557  | 14.37729632 |
| C | 3.92022253  | 1.42702108  | 14.37733721 |
| C | 3.92021960  | -1.42702839 | 14.37729632 |
| C | 3.19594777  | -2.68150176 | 14.37733721 |
| C | 0.72426697  | -4.10852396 | 14.37729632 |
| C | -0.72427476 | -4.10852284 | 14.37733721 |
| C | -3.19595264 | -2.68149557 | 14.37729632 |
| C | -3.92022253 | -1.42702108 | 14.37733721 |
| C | -3.92021960 | 1.42702839  | 14.37729632 |
| C | -3.19594777 | 2.68150176  | 14.37733721 |
| C | -0.72426697 | 4.10852396  | 14.37729632 |
| C | 0.72427476  | 4.10852284  | 14.37733721 |
| C | 4.10725495  | 0.72599106  | 15.62009917 |
| C | 4.10725458  | -0.72599161 | 15.62015826 |
| C | 2.68235417  | -3.19399160 | 15.62009917 |
| C | 1.42490011  | -3.91998262 | 15.62015826 |
| C | -1.42490078 | -3.91998265 | 15.62009917 |
| C | -2.68235447 | -3.19399100 | 15.62015826 |
| C | -4.10725495 | -0.72599106 | 15.62009917 |
| C | -4.10725458 | 0.72599161  | 15.62015826 |
| C | -2.68235417 | 3.19399160  | 15.62009917 |
| C | -1.42490011 | 3.91998262  | 15.62015826 |
| C | 1.42490078  | 3.91998265  | 15.62009917 |
| C | 2.68235447  | 3.19399100  | 15.62015826 |
| C | 3.89986274  | -1.42455378 | 16.87064308 |
| C | 3.18363315  | -2.66510047 | 16.87067866 |
| C | 0.71623161  | -4.08965709 | 16.87064308 |
| C | -0.71622813 | -4.08965742 | 16.87067866 |
| C | -3.18363113 | -2.66510331 | 16.87064308 |
| C | -3.89986129 | -1.42455695 | 16.87067866 |
| C | -3.89986274 | 1.42455378  | 16.87064308 |
| C | -3.18363315 | 2.66510047  | 16.87067866 |
| C | -0.71623161 | 4.08965709  | 16.87064308 |

|   |             |             |              |
|---|-------------|-------------|--------------|
| C | 0.71622813  | 4.08965742  | 16.87067866  |
| C | 3.18363113  | 2.66510331  | 16.87064308  |
| C | 3.89986129  | 1.42455695  | 16.87067866  |
| C | 2.67759082  | -3.18660428 | 18.13320062  |
| C | 1.42088934  | -3.91216202 | 18.13319445  |
| C | -1.42088485 | -3.91216381 | 18.13320062  |
| C | -2.67758703 | -3.18660727 | 18.13319445  |
| C | -4.09847567 | -0.72555953 | 18.13320062  |
| C | -4.09847636 | 0.72555475  | 18.13319445  |
| C | -2.67759082 | 3.18660428  | 18.13320062  |
| C | -1.42088934 | 3.91216202  | 18.13319445  |
| C | 1.42088485  | 3.91216381  | 18.13320062  |
| C | 2.67758703  | 3.18660727  | 18.13319445  |
| C | 4.09847567  | 0.72555953  | 18.13320062  |
| C | 4.09847636  | -0.72555475 | 18.13319445  |
| C | 0.73689825  | -4.15134301 | 19.37298323  |
| C | -0.73689770 | -4.15134421 | 19.37294791  |
| C | -3.22671938 | -2.71384411 | 19.37298323  |
| C | -3.96361840 | -1.43749998 | 19.37294791  |
| C | -3.96361764 | 1.43749890  | 19.37298323  |
| C | -3.22672070 | 2.71384423  | 19.37294791  |
| C | -0.73689825 | 4.15134301  | 19.37298323  |
| C | 0.73689770  | 4.15134421  | 19.37294791  |
| C | 3.22671938  | 2.71384411  | 19.37298323  |
| C | 3.96361840  | 1.43749998  | 19.37294791  |
| C | 3.96361764  | -1.43749890 | 19.37298323  |
| C | 3.22672070  | -2.71384423 | 19.37294791  |
| C | -1.50686850 | -3.99637199 | 20.58568560  |
| C | -2.70752634 | -3.30317343 | 20.58564759  |
| C | -4.21439392 | -0.69319959 | 20.58568560  |
| C | -4.21439527 | 0.69319988  | 20.58564759  |
| C | -2.70752542 | 3.30317240  | 20.58568560  |
| C | -1.50686893 | 3.99637331  | 20.58564759  |
| C | 1.50686850  | 3.99637199  | 20.58568560  |
| C | 2.70752634  | 3.30317343  | 20.58564759  |
| C | 4.21439392  | 0.69319959  | 20.58568560  |
| C | 4.21439527  | -0.69319988 | 20.58564759  |
| C | 2.70752542  | -3.30317240 | 20.58568560  |
| C | 1.50686893  | -3.99637331 | 20.58564759  |
| H | -4.31379833 | 1.07423183  | -21.54300754 |
| H | -3.08721180 | 3.19873736  | -21.54299431 |
| H | -1.22658711 | 4.27297485  | -21.54300754 |
| H | 1.22658192  | 4.27297253  | -21.54299431 |
| H | 3.08721121  | 3.19874302  | -21.54300754 |
| H | 4.31379372  | 1.07423516  | -21.54299431 |
| H | 4.31379833  | -1.07423183 | -21.54300754 |
| H | 3.08721180  | -3.19873736 | -21.54299431 |
| H | 1.22658711  | -4.27297485 | -21.54300754 |
| H | -1.22658192 | -4.27297253 | -21.54299431 |
| H | -3.08721121 | -3.19874302 | -21.54300754 |
| H | -4.31379372 | -1.07423516 | -21.54299431 |
| H | -1.07423516 | -4.31379372 | 21.54299431  |
| H | -3.19874302 | -3.08721121 | 21.54300754  |
| H | -4.27297253 | -1.22658192 | 21.54299431  |
| H | -4.27297485 | 1.22658711  | 21.54300754  |
| H | -3.19873736 | 3.08721180  | 21.54299431  |
| H | -1.07423183 | 4.31379833  | 21.54300754  |
| H | 1.07423516  | 4.31379372  | 21.54299431  |
| H | 3.19874302  | 3.08721121  | 21.54300754  |
| H | 4.27297253  | 1.22658192  | 21.54299431  |
| H | 4.27297485  | -1.22658711 | 21.54300754  |
| H | 3.19873736  | -3.08721180 | 21.54299431  |
| H | 1.07423183  | -4.31379833 | 21.54300754  |

Nanotube (6,6) u17v6s  
B3LYP/STO-3G Energy: -15826.093167

|   |             |            |             |
|---|-------------|------------|-------------|
| C | -3.89059334 | 1.75912884 | 21.21841259 |
|---|-------------|------------|-------------|

|   |             |             |             |
|---|-------------|-------------|-------------|
| C | -4.24891709 | 0.42184641  | 21.21841259 |
| C | -3.46874693 | -2.48978825 | 21.21841259 |
| C | -2.48978825 | -3.46874693 | 21.21841259 |
| C | 0.42184641  | -4.24891709 | 21.21841259 |
| C | 1.75912884  | -3.89059334 | 21.21841259 |
| C | 3.89059334  | -1.75912884 | 21.21841259 |
| C | 4.24891709  | -0.42184641 | 21.21841259 |
| C | 3.46874693  | 2.48978825  | 21.21841259 |
| C | 2.48978825  | 3.46874693  | 21.21841259 |
| C | -0.42184641 | 4.24891709  | 21.21841259 |
| C | -1.75912884 | 3.89059334  | 21.21841259 |
| C | -4.19788347 | -0.36350112 | 20.00366365 |
| C | -3.81722428 | -1.78414053 | 20.00366365 |
| C | -1.78414053 | -3.81722428 | 20.00366365 |
| C | -0.36350112 | -4.19788347 | 20.00366365 |
| C | 2.41374294  | -3.45372316 | 20.00366365 |
| C | 3.45372316  | -2.41374294 | 20.00366365 |
| C | 4.19788347  | 0.36350112  | 20.00366365 |
| C | 3.81722428  | 1.78414053  | 20.00366365 |
| C | 1.78414053  | 3.81722428  | 20.00366365 |
| C | 0.36350112  | 4.19788347  | 20.00366365 |
| C | -2.41374294 | 3.45372316  | 20.00366365 |
| C | -3.45372316 | 2.41374294  | 20.00366365 |
| C | -3.41138479 | -2.38477983 | 18.76380046 |
| C | -2.38477983 | -3.41138479 | 18.76380046 |
| C | 0.35958752  | -4.14673581 | 18.76380046 |
| C | 1.76195597  | -3.77097231 | 18.76380046 |
| C | 3.77097231  | -1.76195597 | 18.76380046 |
| C | 4.14673581  | -0.35958752 | 18.76380046 |
| C | 3.41138479  | 2.38477983  | 18.76380046 |
| C | 2.38477983  | 3.41138479  | 18.76380046 |
| C | -0.35958752 | 4.14673581  | 18.76380046 |
| C | -1.76195597 | 3.77097231  | 18.76380046 |
| C | -3.77097231 | 1.76195597  | 18.76380046 |
| C | -4.14673581 | 0.35958752  | 18.76380046 |
| C | -1.74920485 | -3.76370345 | 17.50233194 |
| C | -0.36699589 | -4.13406522 | 17.50233194 |
| C | 2.38486037  | -3.39670756 | 17.50233194 |
| C | 3.39670756  | -2.38486037 | 17.50233194 |
| C | 4.13406522  | 0.36699589  | 17.50233194 |
| C | 3.76370345  | 1.74920485  | 17.50233194 |
| C | 1.74920485  | 3.76370345  | 17.50233194 |
| C | 0.36699589  | 4.13406522  | 17.50233194 |
| C | -2.38486037 | 3.39670756  | 17.50233194 |
| C | -3.39670756 | 2.38486037  | 17.50233194 |
| C | -4.13406522 | -0.36699589 | 17.50233194 |
| C | -3.76370345 | -1.74920485 | 17.50233194 |
| C | 0.36271589  | -4.15232892 | 16.24944053 |
| C | 1.76204329  | -3.77738028 | 16.24944053 |
| C | 3.77738028  | -1.76204329 | 16.24944053 |
| C | 4.15232892  | -0.36271589 | 16.24944053 |
| C | 3.41466439  | 2.39028563  | 16.24944053 |
| C | 2.39028563  | 3.41466439  | 16.24944053 |
| C | -0.36271589 | 4.15232892  | 16.24944053 |
| C | -1.76204329 | 3.77738028  | 16.24944053 |
| C | -3.77738028 | 1.76204329  | 16.24944053 |
| C | -4.15232892 | 0.36271589  | 16.24944053 |
| C | -3.41466439 | -2.39028563 | 16.24944053 |
| C | -2.39028563 | -3.41466439 | 16.24944053 |
| C | 2.39254288  | -3.41762002 | 15.00637879 |
| C | 3.41762002  | -2.39254288 | 15.00637879 |
| C | 4.15601720  | 0.36319291  | 15.00637879 |
| C | 3.78081293  | 1.76347431  | 15.00637879 |
| C | 1.76347431  | 3.78081293  | 15.00637879 |
| C | 0.36319291  | 4.15601720  | 15.00637879 |
| C | -2.39254288 | 3.41762002  | 15.00637879 |
| C | -3.41762002 | 2.39254288  | 15.00637879 |
| C | -4.15601720 | -0.36319291 | 15.00637879 |
| C | -3.78081293 | -1.76347431 | 15.00637879 |
| C | -1.76347431 | -3.78081293 | 15.00637879 |

|   |             |             |             |
|---|-------------|-------------|-------------|
| C | -0.36319291 | -4.15601720 | 15.00637879 |
| C | 3.77656109  | -1.75645563 | 13.75329086 |
| C | 4.14882565  | -0.36714535 | 13.75329086 |
| C | 3.40941574  | 2.39237003  | 13.75329086 |
| C | 2.39237003  | 3.40941574  | 13.75329086 |
| C | -0.36714535 | 4.14882565  | 13.75329086 |
| C | -1.75645563 | 3.77656109  | 13.75329086 |
| C | -3.77656109 | 1.75645563  | 13.75329086 |
| C | -4.14882565 | 0.36714535  | 13.75329086 |
| C | -3.40941574 | -2.39237003 | 13.75329086 |
| C | -2.39237003 | -3.40941574 | 13.75329086 |
| C | 0.36714535  | -4.14882565 | 13.75329086 |
| C | 1.75645563  | -3.77656109 | 13.75329086 |
| C | 4.15413853  | 0.36415525  | 12.49978530 |
| C | 3.77966712  | 1.76170156  | 12.49978530 |
| C | 1.76170156  | 3.77966712  | 12.49978530 |
| C | 0.36415525  | 4.15413853  | 12.49978530 |
| C | -2.39243696 | 3.41551187  | 12.49978530 |
| C | -3.41551187 | 2.39243696  | 12.49978530 |
| C | -4.15413853 | -0.36415525 | 12.49978530 |
| C | -3.77966712 | -1.76170156 | 12.49978530 |
| C | -1.76170156 | -3.77966712 | 12.49978530 |
| C | -0.36415525 | -4.15413853 | 12.49978530 |
| C | 2.39243696  | -3.41551187 | 12.49978530 |
| C | 3.41551187  | -2.39243696 | 12.49978530 |
| C | 3.41792361  | 2.39266014  | 11.25466869 |
| C | 2.39266014  | 3.41792361  | 11.25466869 |
| C | -0.36314266 | 4.15633875  | 11.25466869 |
| C | -1.76367860 | 3.78106627  | 11.25466869 |
| C | -3.78106627 | 1.76367860  | 11.25466869 |
| C | -4.15633875 | 0.36314266  | 11.25466869 |
| C | -3.41792361 | -2.39266014 | 11.25466869 |
| C | -2.39266014 | -3.41792361 | 11.25466869 |
| C | 0.36314266  | -4.15633875 | 11.25466869 |
| C | 1.76367860  | -3.78106627 | 11.25466869 |
| C | 3.78106627  | -1.76367860 | 11.25466869 |
| C | 4.15633875  | -0.36314266 | 11.25466869 |
| C | 1.75766276  | 3.77764877  | 10.00371207 |
| C | 0.36664378  | 4.15037118  | 10.00371207 |
| C | -2.39270842 | 3.41100499  | 10.00371207 |
| C | -3.41100499 | 2.39270842  | 10.00371207 |
| C | -4.15037118 | -0.36664378 | 10.00371207 |
| C | -3.77764877 | -1.75766276 | 10.00371207 |
| C | -1.75766276 | -3.77764877 | 10.00371207 |
| C | -0.36664378 | -4.15037118 | 10.00371207 |
| C | 2.39270842  | -3.41100499 | 10.00371207 |
| C | 3.41100499  | -2.39270842 | 10.00371207 |
| C | 4.15037118  | 0.36664378  | 10.00371207 |
| C | 3.77764877  | 1.75766276  | 10.00371207 |
| C | -0.36479410 | 4.15415887  | 8.74969121  |
| C | -1.76115847 | 3.78000417  | 8.74969121  |
| C | -3.78000417 | 1.76115847  | 8.74969121  |
| C | -4.15415887 | 0.36479410  | 8.74969121  |
| C | -3.41521006 | -2.39300040 | 8.74969121  |
| C | -2.39300040 | -3.41521006 | 8.74969121  |
| C | 0.36479410  | -4.15415887 | 8.74969121  |
| C | 1.76115847  | -3.78000417 | 8.74969121  |
| C | 3.78000417  | -1.76115847 | 8.74969121  |
| C | 4.15415887  | -0.36479410 | 8.74969121  |
| C | 3.41521006  | 2.39300040  | 8.74969121  |
| C | 2.39300040  | 3.41521006  | 8.74969121  |
| C | -2.39296031 | 3.41832990  | 7.50335518  |
| C | -3.41832990 | 2.39296031  | 7.50335518  |
| C | -4.15684068 | -0.36319947 | 7.50335518  |
| C | -3.78152936 | -1.76388038 | 7.50335518  |
| C | -1.76388038 | -3.78152936 | 7.50335518  |
| C | -0.36319947 | -4.15684068 | 7.50335518  |
| C | 2.39296031  | -3.41832990 | 7.50335518  |
| C | 3.41832990  | -2.39296031 | 7.50335518  |
| C | 4.15684068  | 0.36319947  | 7.50335518  |



|   |             |             |            |
|---|-------------|-------------|------------|
| C | 3.78152936  | 1.76388038  | 7.50335518 |
| C | 1.76388038  | 3.78152936  | 7.50335518 |
| C | 0.36319947  | 4.15684068  | 7.50335518 |
| C | -3.77735731 | 1.75819569  | 6.25321757 |
| C | -4.15038524 | 0.36603652  | 6.25321757 |
| C | -3.41132079 | -2.39218955 | 6.25321757 |
| C | -2.39218955 | -3.41132079 | 6.25321757 |
| C | 0.36603652  | -4.15038524 | 6.25321757 |
| C | 1.75819569  | -3.77735731 | 6.25321757 |
| C | 3.77735731  | -1.75819569 | 6.25321757 |
| C | 4.15038524  | -0.36603652 | 6.25321757 |
| C | 3.41132079  | 2.39218955  | 6.25321757 |
| C | 2.39218955  | 3.41132079  | 6.25321757 |
| C | -0.36603652 | 4.15038524  | 6.25321757 |
| C | -1.75819569 | 3.77735731  | 6.25321757 |
| C | -4.15292165 | -0.36512364 | 4.99852904 |
| C | -3.77909747 | -1.76025448 | 4.99852904 |
| C | -1.76025448 | -3.77909747 | 4.99852904 |
| C | -0.36512364 | -4.15292165 | 4.99852904 |
| C | 2.39266717  | -3.41397383 | 4.99852904 |
| C | 3.41397383  | -2.39266717 | 4.99852904 |
| C | 4.15292165  | 0.36512364  | 4.99852904 |
| C | 3.77909747  | 1.76025448  | 4.99852904 |
| C | 1.76025448  | 3.77909747  | 4.99852904 |
| C | 0.36512364  | 4.15292165  | 4.99852904 |
| C | -2.39266717 | 3.41397383  | 4.99852904 |
| C | -3.41397383 | 2.39266717  | 4.99852904 |
| C | -3.41888256 | -2.39333716 | 3.75127636 |
| C | -2.39333716 | -3.41888256 | 3.75127636 |
| C | 0.36324950  | -4.15750773 | 3.75127636 |
| C | 1.76417057  | -3.78213206 | 3.75127636 |
| C | 3.78213206  | -1.76417057 | 3.75127636 |
| C | 4.15750773  | -0.36324950 | 3.75127636 |
| C | 3.41888256  | 2.39333716  | 3.75127636 |
| C | 2.39333716  | 3.41888256  | 3.75127636 |
| C | -0.36324950 | 4.15750773  | 3.75127636 |
| C | -1.76417057 | 3.78213206  | 3.75127636 |
| C | -3.78213206 | 1.76417057  | 3.75127636 |
| C | -4.15750773 | 0.36324950  | 3.75127636 |
| C | -1.75907406 | -3.77827292 | 2.50232890 |
| C | -0.36573363 | -4.15161736 | 2.50232890 |
| C | 2.39254330  | -3.41253928 | 2.50232890 |
| C | 3.41253928  | -2.39254330 | 2.50232890 |
| C | 4.15161736  | 0.36573363  | 2.50232890 |
| C | 3.77827292  | 1.75907406  | 2.50232890 |
| C | 1.75907406  | 3.77827292  | 2.50232890 |
| C | 0.36573363  | 4.15161736  | 2.50232890 |
| C | -2.39254330 | 3.41253928  | 2.50232890 |
| C | -3.41253928 | 2.39254330  | 2.50232890 |
| C | -4.15161736 | -0.36573363 | 2.50232890 |
| C | -3.77827292 | -1.75907406 | 2.50232890 |
| C | 0.36546154  | -4.15216167 | 1.24792827 |
| C | 1.75958186  | -3.77860826 | 1.24792827 |
| C | 3.77860826  | -1.75958186 | 1.24792827 |
| C | 4.15216167  | -0.36546154 | 1.24792827 |
| C | 3.41314672  | 2.39257981  | 1.24792827 |
| C | 2.39257981  | 3.41314672  | 1.24792827 |
| C | -0.36546154 | 4.15216167  | 1.24792827 |
| C | -1.75958186 | 3.77860826  | 1.24792827 |
| C | -3.77860826 | 1.75958186  | 1.24792827 |
| C | -4.15216167 | 0.36546154  | 1.24792827 |
| C | -3.41314672 | -2.39257981 | 1.24792827 |
| C | -2.39257981 | -3.41314672 | 1.24792827 |
| C | 2.39315245  | -3.41874332 | 0.00000000 |
| C | 3.41874332  | -2.39315245 | 0.00000000 |
| C | 4.15729479  | 0.36315916  | 0.00000000 |
| C | 3.78190248  | 1.76414234  | 0.00000000 |
| C | 1.76414234  | 3.78190248  | 0.00000000 |
| C | 0.36315916  | 4.15729479  | 0.00000000 |
| C | -2.39315245 | 3.41874332  | 0.00000000 |

|   |             |             |             |
|---|-------------|-------------|-------------|
| C | -3.41874332 | 2.39315245  | 0.00000000  |
| C | -4.15729479 | -0.36315916 | 0.00000000  |
| C | -3.78190248 | -1.76414234 | 0.00000000  |
| C | -1.76414234 | -3.78190248 | 0.00000000  |
| C | -0.36315916 | -4.15729479 | 0.00000000  |
| C | 3.77860826  | -1.75958186 | -1.24792827 |
| C | 4.15216167  | -0.36546154 | -1.24792827 |
| C | 3.41314672  | 2.39257981  | -1.24792827 |
| C | 2.39257981  | 3.41314672  | -1.24792827 |
| C | -0.36546154 | 4.15216167  | -1.24792827 |
| C | -1.75958186 | 3.77860826  | -1.24792827 |
| C | -3.77860826 | 1.75958186  | -1.24792827 |
| C | -4.15216167 | 0.36546154  | -1.24792827 |
| C | -3.41314672 | -2.39257981 | -1.24792827 |
| C | -2.39257981 | -3.41314672 | -1.24792827 |
| C | 0.36546154  | -4.15216167 | -1.24792827 |
| C | 1.75958186  | -3.77860826 | -1.24792827 |
| C | 4.15161736  | 0.36573363  | -2.50232890 |
| C | 3.77827292  | 1.75907406  | -2.50232890 |
| C | 1.75907406  | 3.77827292  | -2.50232890 |
| C | 0.36573363  | 4.15161736  | -2.50232890 |
| C | -2.39254330 | 3.41253928  | -2.50232890 |
| C | -3.41253928 | 2.39254330  | -2.50232890 |
| C | -4.15161736 | -0.36573363 | -2.50232890 |
| C | -3.77827292 | -1.75907406 | -2.50232890 |
| C | -1.75907406 | -3.77827292 | -2.50232890 |
| C | -0.36573363 | -4.15161736 | -2.50232890 |
| C | 2.39254330  | -3.41253928 | -2.50232890 |
| C | 3.41253928  | -2.39254330 | -2.50232890 |
| C | 3.41888256  | 2.39333716  | -3.75127636 |
| C | 2.39333716  | 3.41888256  | -3.75127636 |
| C | -0.36324950 | 4.15750773  | -3.75127636 |
| C | -1.76417057 | 3.78213206  | -3.75127636 |
| C | -3.78213206 | 1.76417057  | -3.75127636 |
| C | -4.15750773 | 0.36324950  | -3.75127636 |
| C | -3.41888256 | -2.39333716 | -3.75127636 |
| C | -2.39333716 | -3.41888256 | -3.75127636 |
| C | 0.36324950  | -4.15750773 | -3.75127636 |
| C | 1.76417057  | -3.78213206 | -3.75127636 |
| C | 3.78213206  | -1.76417057 | -3.75127636 |
| C | 4.15750773  | -0.36324950 | -3.75127636 |
| C | 1.76025448  | 3.77909747  | -4.99852904 |
| C | 0.36512364  | 4.15292165  | -4.99852904 |
| C | -2.39266717 | 3.41397383  | -4.99852904 |
| C | -3.41397383 | 2.39266717  | -4.99852904 |
| C | -4.15292165 | -0.36512364 | -4.99852904 |
| C | -3.77909747 | -1.76025448 | -4.99852904 |
| C | -1.76025448 | -3.77909747 | -4.99852904 |
| C | -0.36512364 | -4.15292165 | -4.99852904 |
| C | 2.39266717  | -3.41397383 | -4.99852904 |
| C | 3.41397383  | -2.39266717 | -4.99852904 |
| C | 4.15292165  | 0.36512364  | -4.99852904 |
| C | 3.77909747  | 1.76025448  | -4.99852904 |
| C | -0.36603652 | 4.15038524  | -6.25321757 |
| C | -1.75819569 | 3.77735731  | -6.25321757 |
| C | -3.77735731 | 1.75819569  | -6.25321757 |
| C | -4.15038524 | 0.36603652  | -6.25321757 |
| C | -3.41132079 | -2.39218955 | -6.25321757 |
| C | -2.39218955 | -3.41132079 | -6.25321757 |
| C | 0.36603652  | -4.15038524 | -6.25321757 |
| C | 1.75819569  | -3.77735731 | -6.25321757 |
| C | 3.77735731  | -1.75819569 | -6.25321757 |
| C | 4.15038524  | -0.36603652 | -6.25321757 |
| C | 3.41132079  | 2.39218955  | -6.25321757 |
| C | 2.39218955  | 3.41132079  | -6.25321757 |
| C | -2.39296031 | 3.41832990  | -7.50335518 |
| C | -3.41832990 | 2.39296031  | -7.50335518 |
| C | -4.15684068 | -0.36319947 | -7.50335518 |
| C | -3.78152936 | -1.76388038 | -7.50335518 |
| C | -1.76388038 | -3.78152936 | -7.50335518 |

|   |             |             |              |
|---|-------------|-------------|--------------|
| C | -0.36319947 | -4.15684068 | -7.50335518  |
| C | 2.39296031  | -3.41832990 | -7.50335518  |
| C | 3.41832990  | -2.39296031 | -7.50335518  |
| C | 4.15684068  | 0.36319947  | -7.50335518  |
| C | 3.78152936  | 1.76388038  | -7.50335518  |
| C | 1.76388038  | 3.78152936  | -7.50335518  |
| C | 0.36319947  | 4.15684068  | -7.50335518  |
| C | -3.78000417 | 1.76115847  | -8.74969121  |
| C | -4.15415887 | 0.36479410  | -8.74969121  |
| C | -3.41521006 | -2.39300040 | -8.74969121  |
| C | -2.39300040 | -3.41521006 | -8.74969121  |
| C | 0.36479410  | -4.15415887 | -8.74969121  |
| C | 1.76115847  | -3.78000417 | -8.74969121  |
| C | 3.78000417  | -1.76115847 | -8.74969121  |
| C | 4.15415887  | -0.36479410 | -8.74969121  |
| C | 3.41521006  | 2.39300040  | -8.74969121  |
| C | 2.39300040  | 3.41521006  | -8.74969121  |
| C | -0.36479410 | 4.15415887  | -8.74969121  |
| C | -1.76115847 | 3.78000417  | -8.74969121  |
| C | -4.15037118 | -0.36664378 | -10.00371207 |
| C | -3.77764877 | -1.75766276 | -10.00371207 |
| C | -1.75766276 | -3.77764877 | -10.00371207 |
| C | -0.36664378 | -4.15037118 | -10.00371207 |
| C | 2.39270842  | -3.41100499 | -10.00371207 |
| C | 3.41100499  | -2.39270842 | -10.00371207 |
| C | 4.15037118  | 0.36664378  | -10.00371207 |
| C | 3.77764877  | 1.75766276  | -10.00371207 |
| C | 1.75766276  | 3.77764877  | -10.00371207 |
| C | 0.36664378  | 4.15037118  | -10.00371207 |
| C | -2.39270842 | 3.41100499  | -10.00371207 |
| C | -3.41100499 | 2.39270842  | -10.00371207 |
| C | -3.41792361 | -2.39266014 | -11.25466869 |
| C | -2.39266014 | -3.41792361 | -11.25466869 |
| C | 0.36314266  | -4.15633875 | -11.25466869 |
| C | 1.76367860  | -3.78106627 | -11.25466869 |
| C | 3.78106627  | -1.76367860 | -11.25466869 |
| C | 4.15633875  | -0.36314266 | -11.25466869 |
| C | 3.41792361  | 2.39266014  | -11.25466869 |
| C | 2.39266014  | 3.41792361  | -11.25466869 |
| C | -0.36314266 | 4.15633875  | -11.25466869 |
| C | -1.76367860 | 3.78106627  | -11.25466869 |
| C | -3.78106627 | 1.76367860  | -11.25466869 |
| C | -4.15633875 | 0.36314266  | -11.25466869 |
| C | -1.76170156 | -3.77966712 | -12.49978530 |
| C | -0.36415525 | -4.15413853 | -12.49978530 |
| C | 2.39243696  | -3.41551187 | -12.49978530 |
| C | 3.41551187  | -2.39243696 | -12.49978530 |
| C | 4.15413853  | 0.36415525  | -12.49978530 |
| C | 3.77966712  | 1.76170156  | -12.49978530 |
| C | 1.76170156  | 3.77966712  | -12.49978530 |
| C | 0.36415525  | 4.15413853  | -12.49978530 |
| C | -2.39243696 | 3.41551187  | -12.49978530 |
| C | -3.41551187 | 2.39243696  | -12.49978530 |
| C | -4.15413853 | -0.36415525 | -12.49978530 |
| C | -3.77966712 | -1.76170156 | -12.49978530 |
| C | 0.36714535  | -4.14882565 | -13.75329086 |
| C | 1.75645563  | -3.77656109 | -13.75329086 |
| C | 3.77656109  | -1.75645563 | -13.75329086 |
| C | 4.14882565  | -0.36714535 | -13.75329086 |
| C | 3.40941574  | 2.39237003  | -13.75329086 |
| C | 2.39237003  | 3.40941574  | -13.75329086 |
| C | -0.36714535 | 4.14882565  | -13.75329086 |
| C | -1.75645563 | 3.77656109  | -13.75329086 |
| C | -3.77656109 | 1.75645563  | -13.75329086 |
| C | -4.14882565 | 0.36714535  | -13.75329086 |
| C | -3.40941574 | -2.39237003 | -13.75329086 |
| C | -2.39237003 | -3.40941574 | -13.75329086 |
| C | 2.39254288  | -3.41762002 | -15.00637879 |
| C | 3.41762002  | -2.39254288 | -15.00637879 |
| C | 4.15601720  | 0.36319291  | -15.00637879 |

|   |             |             |              |
|---|-------------|-------------|--------------|
| C | 3.78081293  | 1.76347431  | -15.00637879 |
| C | 1.76347431  | 3.78081293  | -15.00637879 |
| C | 0.36319291  | 4.15601720  | -15.00637879 |
| C | -2.39254288 | 3.41762002  | -15.00637879 |
| C | -3.41762002 | 2.39254288  | -15.00637879 |
| C | -4.15601720 | -0.36319291 | -15.00637879 |
| C | -3.78081293 | -1.76347431 | -15.00637879 |
| C | -1.76347431 | -3.78081293 | -15.00637879 |
| C | -0.36319291 | -4.15601720 | -15.00637879 |
| C | 3.77738028  | -1.76204329 | -16.24944053 |
| C | 4.15232892  | -0.36271589 | -16.24944053 |
| C | 3.41466439  | 2.39028563  | -16.24944053 |
| C | 2.39028563  | 3.41466439  | -16.24944053 |
| C | -0.36271589 | 4.15232892  | -16.24944053 |
| C | -1.76204329 | 3.77738028  | -16.24944053 |
| C | -3.77738028 | 1.76204329  | -16.24944053 |
| C | -4.15232892 | 0.36271589  | -16.24944053 |
| C | -3.41466439 | -2.39028563 | -16.24944053 |
| C | -2.39028563 | -3.41466439 | -16.24944053 |
| C | 0.36271589  | -4.15232892 | -16.24944053 |
| C | 1.76204329  | -3.77738028 | -16.24944053 |
| C | 4.13406522  | 0.36699589  | -17.50233194 |
| C | 3.76370345  | 1.74920485  | -17.50233194 |
| C | 1.74920485  | 3.76370345  | -17.50233194 |
| C | 0.36699589  | 4.13406522  | -17.50233194 |
| C | -2.38486037 | 3.39670756  | -17.50233194 |
| C | -3.39670756 | 2.38486037  | -17.50233194 |
| C | -4.13406522 | -0.36699589 | -17.50233194 |
| C | -3.76370345 | -1.74920485 | -17.50233194 |
| C | -1.74920485 | -3.76370345 | -17.50233194 |
| C | -0.36699589 | -4.13406522 | -17.50233194 |
| C | 2.38486037  | -3.39670756 | -17.50233194 |
| C | 3.39670756  | -2.38486037 | -17.50233194 |
| C | 3.41138479  | 2.38477983  | -18.76380046 |
| C | 2.38477983  | 3.41138479  | -18.76380046 |
| C | -0.35958752 | 4.14673581  | -18.76380046 |
| C | -1.76195597 | 3.77097231  | -18.76380046 |
| C | -3.77097231 | 1.76195597  | -18.76380046 |
| C | -4.14673581 | 0.35958752  | -18.76380046 |
| C | -3.41138479 | -2.38477983 | -18.76380046 |
| C | -2.38477983 | -3.41138479 | -18.76380046 |
| C | 0.35958752  | -4.14673581 | -18.76380046 |
| C | 1.76195597  | -3.77097231 | -18.76380046 |
| C | 3.77097231  | -1.76195597 | -18.76380046 |
| C | 4.14673581  | -0.35958752 | -18.76380046 |
| C | 1.78414053  | 3.81722428  | -20.00366365 |
| C | 0.36350112  | 4.19788347  | -20.00366365 |
| C | -2.41374294 | 3.45372316  | -20.00366365 |
| C | -3.45372316 | 2.41374294  | -20.00366365 |
| C | -4.19788347 | -0.36350112 | -20.00366365 |
| C | -3.81722428 | -1.78414053 | -20.00366365 |
| C | -1.78414053 | -3.81722428 | -20.00366365 |
| C | -0.36350112 | -4.19788347 | -20.00366365 |
| C | 2.41374294  | -3.45372316 | -20.00366365 |
| C | 3.45372316  | -2.41374294 | -20.00366365 |
| C | 4.19788347  | 0.36350112  | -20.00366365 |
| C | 3.81722428  | 1.78414053  | -20.00366365 |
| C | -0.42184641 | 4.24891709  | -21.21841259 |
| C | -1.75912884 | 3.89059334  | -21.21841259 |
| C | -3.89059334 | 1.75912884  | -21.21841259 |
| C | -4.24891709 | 0.42184641  | -21.21841259 |
| C | -3.46874693 | -2.48978825 | -21.21841259 |
| C | -2.48978825 | -3.46874693 | -21.21841259 |
| C | 0.42184641  | -4.24891709 | -21.21841259 |
| C | 1.75912884  | -3.89059334 | -21.21841259 |
| C | 3.89059334  | -1.75912884 | -21.21841259 |
| C | 4.24891709  | -0.42184641 | -21.21841259 |
| C | 3.46874693  | 2.48978825  | -21.21841259 |
| C | 2.48978825  | 3.46874693  | -21.21841259 |
| H | -3.81282310 | 2.29197024  | 22.17469360  |

|   |             |             |              |
|---|-------------|-------------|--------------|
| H | -4.44798679 | -0.07849290 | 22.17469360  |
| H | -3.89131600 | -2.15601655 | 22.17469360  |
| H | -2.15601655 | -3.89131600 | 22.17469360  |
| H | -0.07849290 | -4.44798679 | 22.17469360  |
| H | 2.29197024  | -3.81282310 | 22.17469360  |
| H | 3.81282310  | -2.29197024 | 22.17469360  |
| H | 4.44798679  | 0.07849290  | 22.17469360  |
| H | 3.89131600  | 2.15601655  | 22.17469360  |
| H | 2.15601655  | 3.89131600  | 22.17469360  |
| H | 0.07849290  | 4.44798679  | 22.17469360  |
| H | -2.29197024 | 3.81282310  | 22.17469360  |
| H | 0.07849290  | 4.44798679  | -22.17469360 |
| H | -2.29197024 | 3.81282310  | -22.17469360 |
| H | -3.81282310 | 2.29197024  | -22.17469360 |
| H | -4.44798679 | -0.07849290 | -22.17469360 |
| H | -3.89131600 | -2.15601655 | -22.17469360 |
| H | -2.15601655 | -3.89131600 | -22.17469360 |
| H | -0.07849290 | -4.44798679 | -22.17469360 |
| H | 2.29197024  | -3.81282310 | -22.17469360 |
| H | 3.81282310  | -2.29197024 | -22.17469360 |
| H | 4.44798679  | 0.07849290  | -22.17469360 |
| H | 3.89131600  | 2.15601655  | -22.17469360 |
| H | 2.15601655  | 3.89131600  | -22.17469360 |

Nanotube (6,6) u18v0s  
B3LYP/STO-3G Energy: -16277.866347

|   |             |             |             |
|---|-------------|-------------|-------------|
| C | -3.30179479 | 2.70461377  | 21.85209013 |
| C | -3.99315757 | 1.50713026  | 21.85201995 |
| C | -3.99316163 | -1.50713128 | 21.85209013 |
| C | -3.30179187 | -2.70461077 | 21.85201995 |
| C | -0.69136684 | -4.21174505 | 21.85209013 |
| C | 0.69136570  | -4.21174103 | 21.85201995 |
| C | 3.30179479  | -2.70461377 | 21.85209013 |
| C | 3.99315757  | -1.50713026 | 21.85201995 |
| C | 3.99316163  | 1.50713128  | 21.85209013 |
| C | 3.30179187  | 2.70461077  | 21.85201995 |
| C | 0.69136684  | 4.21174505  | 21.85209013 |
| C | -0.69136570 | 4.21174103  | 21.85201995 |
| C | -4.14619911 | 0.73385642  | 20.63551883 |
| C | -4.14619828 | -0.73385168 | 20.63546377 |
| C | -2.70863786 | -3.22378555 | 20.63551883 |
| C | -1.43756494 | -3.95763888 | 20.63546377 |
| C | 1.43756125  | -3.95764197 | 20.63551883 |
| C | 2.70863334  | -3.22378720 | 20.63546377 |
| C | 4.14619911  | -0.73385642 | 20.63551883 |
| C | 4.14619828  | 0.73385168  | 20.63546377 |
| C | 2.70863786  | 3.22378555  | 20.63551883 |
| C | 1.43756494  | 3.95763888  | 20.63546377 |
| C | -1.43756125 | 3.95764197  | 20.63551883 |
| C | -2.70863334 | 3.22378720  | 20.63546377 |
| C | -3.91262167 | -1.42026456 | 19.39511192 |
| C | -3.18630353 | -2.67828675 | 19.39511622 |
| C | -0.72632565 | -4.09856205 | 19.39511192 |
| C | 0.72631260  | -4.09856318 | 19.39511622 |
| C | 3.18629603  | -2.67829749 | 19.39511192 |
| C | 3.91261613  | -1.42027642 | 19.39511622 |
| C | 3.91262167  | 1.42026456  | 19.39511192 |
| C | 3.18630353  | 2.67828675  | 19.39511622 |
| C | 0.72632565  | 4.09856205  | 19.39511192 |
| C | -0.72631260 | 4.09856318  | 19.39511622 |
| C | -3.18629603 | 2.67829749  | 19.39511192 |
| C | -3.91261613 | 1.42027642  | 19.39511622 |
| C | -2.66258444 | -3.18188642 | 18.13473033 |
| C | -1.42430592 | -3.89680545 | 18.13480111 |
| C | 1.42430225  | -3.89680898 | 18.13473033 |
| C | 2.66257955  | -3.18188784 | 18.13480111 |
| C | 4.08688670  | -0.71492255 | 18.13473033 |

|   |             |             |             |
|---|-------------|-------------|-------------|
| C | 4.08688547  | 0.71491761  | 18.13480111 |
| C | 2.66258444  | 3.18188642  | 18.13473033 |
| C | 1.42430592  | 3.89680545  | 18.13480111 |
| C | -1.42430225 | 3.89680898  | 18.13473033 |
| C | -2.66257955 | 3.18188784  | 18.13480111 |
| C | -4.08688670 | 0.71492255  | 18.13473033 |
| C | -4.08688547 | -0.71491761 | 18.13480111 |
| C | -0.72267461 | -4.10197327 | 16.87982213 |
| C | 0.72267031  | -4.10197376 | 16.87991619 |
| C | 3.19107575  | -2.67684120 | 16.87982213 |
| C | 3.91374864  | -1.42513603 | 16.87991619 |
| C | 3.91375036  | 1.42513206  | 16.87982213 |
| C | 3.19107833  | 2.67683773  | 16.87991619 |
| C | 0.72267461  | 4.10197327  | 16.87982213 |
| C | -0.72267031 | 4.10197376  | 16.87991619 |
| C | -3.19107575 | 2.67684120  | 16.87982213 |
| C | -3.91374864 | 1.42513603  | 16.87991619 |
| C | -3.91375036 | -1.42513206 | 16.87982213 |
| C | -3.19107833 | -2.67683773 | 16.87991619 |
| C | 1.42624368  | -3.92045435 | 15.63597793 |
| C | 2.68210122  | -3.19538246 | 15.63601884 |
| C | 4.10833490  | -0.72506392 | 15.63597793 |
| C | 4.10833300  | 0.72507656  | 15.63601884 |
| C | 2.68209122  | 3.19539043  | 15.63597793 |
| C | 1.42623178  | 3.92045902  | 15.63601884 |
| C | -1.42624368 | 3.92045435  | 15.63597793 |
| C | -2.68210122 | 3.19538246  | 15.63601884 |
| C | -4.10833490 | 0.72506392  | 15.63597793 |
| C | -4.10833300 | -0.72507656 | 15.63601884 |
| C | -2.68209122 | -3.19539043 | 15.63597793 |
| C | -1.42623178 | -3.92045902 | 15.63601884 |
| C | 3.19280656  | -2.67356932 | 14.38458109 |
| C | 3.91178496  | -1.42825990 | 14.38453613 |
| C | 3.91178223  | 1.42826693  | 14.38458109 |
| C | 3.19280184  | 2.67357520  | 14.38453613 |
| C | 0.71897567  | 4.10183625  | 14.38458109 |
| C | -0.71898313 | 4.10183510  | 14.38453613 |
| C | -3.19280656 | 2.67356932  | 14.38458109 |
| C | -3.91178496 | 1.42825990  | 14.38453613 |
| C | -3.91178223 | -1.42826693 | 14.38458109 |
| C | -3.19280184 | -2.67357520 | 14.38453613 |
| C | -0.71897567 | -4.10183625 | 14.38458109 |
| C | 0.71898313  | -4.10183510 | 14.38453613 |
| C | 4.10414356  | -0.72148203 | 13.12929457 |
| C | 4.10414399  | 0.72148215  | 13.12920959 |
| C | 2.67689355  | 3.19355157  | 13.12929457 |
| C | 1.42725012  | 3.91503403  | 13.12920959 |
| C | -1.42725001 | 3.91503360  | 13.12929457 |
| C | -2.67689387 | 3.19355188  | 13.12920959 |
| C | -4.10414356 | 0.72148203  | 13.12929457 |
| C | -4.10414399 | -0.72148215 | 13.12920959 |
| C | -2.67689355 | -3.19355157 | 13.12929457 |
| C | -1.42725012 | -3.91503403 | 13.12920959 |
| C | 1.42725001  | -3.91503360 | 13.12929457 |
| C | 2.67689387  | -3.19355188 | 13.12920959 |
| C | 3.92038761  | 1.42621751  | 11.88241954 |
| C | 3.19534249  | 2.68203664  | 11.88236930 |
| C | 0.72505321  | 4.10826402  | 11.88241954 |
| C | -0.72504062 | 4.10826608  | 11.88236930 |
| C | -3.19533440 | 2.68204651  | 11.88241954 |
| C | -3.92038310 | 1.42622945  | 11.88236930 |
| C | -3.92038761 | -1.42621751 | 11.88241954 |
| C | -3.19534249 | -2.68203664 | 11.88236930 |
| C | -0.72505321 | -4.10826402 | 11.88241954 |
| C | 0.72504062  | -4.10826608 | 11.88236930 |
| C | 3.19533440  | -2.68204651 | 11.88241954 |
| C | 3.92038310  | -1.42622945 | 11.88236930 |
| C | 2.67562915  | 3.19343984  | 10.63339332 |
| C | 1.42779245  | 3.91387957  | 10.63341088 |
| C | -1.42778545 | 3.91388273  | 10.63339332 |

|   |             |             |             |
|---|-------------|-------------|-------------|
| C | -2.67562291 | 3.19344432  | 10.63341088 |
| C | -4.10341460 | 0.72044290  | 10.63339332 |
| C | -4.10341536 | -0.72043525 | 10.63341088 |
| C | -2.67562915 | -3.19343984 | 10.63339332 |
| C | -1.42779245 | -3.91387957 | 10.63341088 |
| C | 1.42778545  | -3.91388273 | 10.63339332 |
| C | 2.67562291  | -3.19344432 | 10.63341088 |
| C | 4.10341460  | -0.72044290 | 10.63339332 |
| C | 4.10341536  | 0.72043525  | 10.63341088 |
| C | 0.72064610  | 4.10377505  | 9.37824792  |
| C | -0.72064524 | 4.10377619  | 9.37829107  |
| C | -3.19365040 | 2.67598535  | 9.37824792  |
| C | -3.91429705 | 1.42779101  | 9.37829107  |
| C | -3.91429650 | -1.42778970 | 9.37824792  |
| C | -3.19365181 | -2.67598518 | 9.37829107  |
| C | -0.72064610 | -4.10377505 | 9.37824792  |
| C | 0.72064524  | -4.10377619 | 9.37829107  |
| C | 3.19365040  | -2.67598535 | 9.37824792  |
| C | 3.91429705  | -1.42779101 | 9.37829107  |
| C | 3.91429650  | 1.42778970  | 9.37824792  |
| C | 3.19365181  | 2.67598518  | 9.37829107  |
| C | -1.42649044 | 3.92039075  | 8.12936145  |
| C | -2.68191984 | 3.19556660  | 8.12936363  |
| C | -4.10840320 | 0.72481842  | 8.12936145  |
| C | -4.10840177 | -0.72482741 | 8.12936363  |
| C | -2.68191276 | -3.19557233 | 8.12936145  |
| C | -1.42648194 | -3.92039401 | 8.12936363  |
| C | 1.42649044  | -3.92039075 | 8.12936145  |
| C | 2.68191984  | -3.19556660 | 8.12936363  |
| C | 4.10840320  | -0.72481842 | 8.12936145  |
| C | 4.10840177  | 0.72482741  | 8.12936363  |
| C | 2.68191276  | 3.19557233  | 8.12936145  |
| C | 1.42648194  | 3.92039401  | 8.12936363  |
| C | -3.19367038 | 2.67709744  | 6.88165846  |
| C | -3.91527043 | 1.42724693  | 6.88160059  |
| C | -3.91526958 | -1.42725096 | 6.88165846  |
| C | -3.19366732 | -2.67710019 | 6.88160059  |
| C | -0.72159921 | -4.10434840 | 6.88165846  |
| C | 0.72160311  | -4.10434712 | 6.88160059  |
| C | 3.19367038  | -2.67709744 | 6.88165846  |
| C | 3.91527043  | -1.42724693 | 6.88160059  |
| C | 3.91526958  | 1.42725096  | 6.88165846  |
| C | 3.19366732  | 2.67710019  | 6.88160059  |
| C | 0.72159921  | 4.10434840  | 6.88165846  |
| C | -0.72160311 | 4.10434712  | 6.88160059  |
| C | -4.10265791 | 0.71997446  | 5.62683415  |
| C | -4.10265849 | -0.71997394 | 5.62675357  |
| C | -2.67484513 | -3.19301874 | 5.62683415  |
| C | -1.42781352 | -3.91299345 | 5.62675357  |
| C | 1.42781278  | -3.91299321 | 5.62683415  |
| C | 2.67484497  | -3.19301951 | 5.62675357  |
| C | 4.10265791  | -0.71997446 | 5.62683415  |
| C | 4.10265849  | 0.71997394  | 5.62675357  |
| C | 2.67484513  | 3.19301874  | 5.62683415  |
| C | 1.42781352  | 3.91299345  | 5.62675357  |
| C | -1.42781278 | 3.91299321  | 5.62683415  |
| C | -2.67484497 | 3.19301951  | 5.62675357  |
| C | -3.91988064 | -1.42684124 | 4.37601569  |
| C | -3.19562438 | -2.68129188 | 4.37594675  |
| C | -0.72425956 | -4.10813684 | 4.37601569  |
| C | 0.72425469  | -4.10813783 | 4.37594675  |
| C | 3.19562108  | -2.68129560 | 4.37601569  |
| C | 3.91987907  | -1.42684595 | 4.37594675  |
| C | 3.91988064  | 1.42684124  | 4.37601569  |
| C | 3.19562438  | 2.68129188  | 4.37594675  |
| C | 0.72425956  | 4.10813684  | 4.37601569  |
| C | -0.72425469 | 4.10813783  | 4.37594675  |
| C | -3.19562108 | 2.68129560  | 4.37601569  |
| C | -3.91987907 | 1.42684595  | 4.37594675  |
| C | -2.67888193 | -3.19469064 | 3.12900710  |

|   |             |             |             |
|---|-------------|-------------|-------------|
| C | -1.42724388 | -3.91732389 | 3.12895671  |
| C | 1.42724228  | -3.91732513 | 3.12900710  |
| C | 2.67888007  | -3.19469140 | 3.12895671  |
| C | 4.10612422  | -0.72263449 | 3.12900710  |
| C | 4.10612394  | 0.72263249  | 3.12895671  |
| C | 2.67888193  | 3.19469064  | 3.12900710  |
| C | 1.42724388  | 3.91732389  | 3.12895671  |
| C | -1.42724228 | 3.91732513  | 3.12900710  |
| C | -2.67888007 | 3.19469140  | 3.12895671  |
| C | -4.10612422 | 0.72263449  | 3.12900710  |
| C | -4.10612394 | -0.72263249 | 3.12895671  |
| C | -0.71969070 | -4.10244173 | 1.87552910  |
| C | 0.71969112  | -4.10244277 | 1.87548087  |
| C | 3.19297341  | -2.67449129 | 1.87552910  |
| C | 3.91266522  | -1.42795059 | 1.87548087  |
| C | 3.91266410  | 1.42795044  | 1.87552910  |
| C | 3.19297409  | 2.67449218  | 1.87548087  |
| C | 0.71969070  | 4.10244173  | 1.87552910  |
| C | -0.71969112 | 4.10244277  | 1.87548087  |
| C | -3.19297341 | 2.67449129  | 1.87552910  |
| C | -3.91266522 | 1.42795059  | 1.87548087  |
| C | -3.91266410 | -1.42795044 | 1.87552910  |
| C | -3.19297409 | -2.67449218 | 1.87548087  |
| C | 1.42703319  | -3.91859428 | 0.62328276  |
| C | 2.68008803  | -3.19514108 | 0.62322002  |
| C | 4.10711879  | -0.72345014 | 0.62328276  |
| C | 4.10711736  | 0.72345378  | 0.62322002  |
| C | 2.68008559  | 3.19514413  | 0.62328276  |
| C | 1.42702933  | 3.91859486  | 0.62322002  |
| C | -1.42703319 | 3.91859428  | 0.62328276  |
| C | -2.68008803 | 3.19514108  | 0.62322002  |
| C | -4.10711879 | 0.72345014  | 0.62328276  |
| C | -4.10711736 | -0.72345378 | 0.62322002  |
| C | -2.68008559 | -3.19514413 | 0.62328276  |
| C | -1.42702933 | -3.91859486 | 0.62322002  |
| C | 3.19514108  | -2.68008803 | -0.62322002 |
| C | 3.91859428  | -1.42703319 | -0.62328276 |
| C | 3.91859486  | 1.42702933  | -0.62322002 |
| C | 3.19514413  | 2.68008559  | -0.62328276 |
| C | 0.72345378  | 4.10711736  | -0.62322002 |
| C | -0.72345014 | 4.10711879  | -0.62328276 |
| C | -3.19514108 | 2.68008803  | -0.62322002 |
| C | -3.91859428 | 1.42703319  | -0.62328276 |
| C | -3.91859486 | -1.42702933 | -0.62322002 |
| C | -3.19514413 | -2.68008559 | -0.62328276 |
| C | -0.72345378 | -4.10711736 | -0.62322002 |
| C | 0.72345014  | -4.10711879 | -0.62328276 |
| C | 4.10244277  | -0.71969112 | -1.87548087 |
| C | 4.10244173  | 0.71969070  | -1.87552910 |
| C | 2.67449218  | 3.19297409  | -1.87548087 |
| C | 1.42795044  | 3.91266410  | -1.87552910 |
| C | -1.42795059 | 3.91266522  | -1.87548087 |
| C | -2.67449129 | 3.19297341  | -1.87552910 |
| C | -4.10244277 | 0.71969112  | -1.87548087 |
| C | -4.10244173 | -0.71969070 | -1.87552910 |
| C | -2.67449218 | -3.19297409 | -1.87548087 |
| C | -1.42795044 | -3.91266410 | -1.87552910 |
| C | 1.42795059  | -3.91266522 | -1.87548087 |
| C | 2.67449129  | -3.19297341 | -1.87552910 |
| C | 3.91732389  | 1.42724388  | -3.12895671 |
| C | 3.19469064  | 2.67888193  | -3.12900710 |
| C | 0.72263249  | 4.10612394  | -3.12895671 |
| C | -0.72263449 | 4.10612422  | -3.12900710 |
| C | -3.19469140 | 2.67888007  | -3.12895671 |
| C | -3.91732513 | 1.42724228  | -3.12900710 |
| C | -3.91732389 | -1.42724388 | -3.12895671 |
| C | -3.19469064 | -2.67888193 | -3.12900710 |
| C | -0.72263249 | -4.10612394 | -3.12895671 |
| C | 0.72263449  | -4.10612422 | -3.12900710 |
| C | 3.19469140  | -2.67888007 | -3.12895671 |



|   |             |             |              |
|---|-------------|-------------|--------------|
| C | 3.91732513  | -1.42724228 | -3.12900710  |
| C | 2.68129188  | 3.19562438  | -4.37594675  |
| C | 1.42684124  | 3.91988064  | -4.37601569  |
| C | -1.42684595 | 3.91987907  | -4.37594675  |
| C | -2.68129560 | 3.19562108  | -4.37601569  |
| C | -4.10813783 | 0.72425469  | -4.37594675  |
| C | -4.10813684 | -0.72425956 | -4.37601569  |
| C | -2.68129188 | -3.19562438 | -4.37594675  |
| C | -1.42684124 | -3.91988064 | -4.37601569  |
| C | 1.42684595  | -3.91987907 | -4.37594675  |
| C | 2.68129560  | -3.19562108 | -4.37601569  |
| C | 4.10813783  | -0.72425469 | -4.37594675  |
| C | 4.10813684  | 0.72425956  | -4.37601569  |
| C | 0.71997394  | 4.10265849  | -5.62675357  |
| C | -0.71997446 | 4.10265791  | -5.62683415  |
| C | -3.19301951 | 2.67484497  | -5.62675357  |
| C | -3.91299321 | 1.42781278  | -5.62683415  |
| C | -3.91299345 | -1.42781352 | -5.62675357  |
| C | -3.19301874 | -2.67484513 | -5.62683415  |
| C | -0.71997394 | -4.10265849 | -5.62675357  |
| C | 0.71997446  | -4.10265791 | -5.62683415  |
| C | 3.19301951  | -2.67484497 | -5.62675357  |
| C | 3.91299321  | -1.42781278 | -5.62683415  |
| C | 3.91299345  | 1.42781352  | -5.62675357  |
| C | 3.19301874  | 2.67484513  | -5.62683415  |
| C | -1.42724693 | 3.91527043  | -6.88160059  |
| C | -2.67709744 | 3.19367038  | -6.88165846  |
| C | -4.10434712 | 0.72160311  | -6.88160059  |
| C | -4.10434840 | -0.72159921 | -6.88165846  |
| C | -2.67710019 | -3.19366732 | -6.88160059  |
| C | -1.42725096 | -3.91526958 | -6.88165846  |
| C | 1.42724693  | -3.91527043 | -6.88160059  |
| C | 2.67709744  | -3.19367038 | -6.88165846  |
| C | 4.10434712  | -0.72160311 | -6.88160059  |
| C | 4.10434840  | 0.72159921  | -6.88165846  |
| C | 2.67710019  | 3.19366732  | -6.88160059  |
| C | 1.42725096  | 3.91526958  | -6.88165846  |
| C | -3.19556660 | 2.68191984  | -8.12936363  |
| C | -3.92039075 | 1.42649044  | -8.12936145  |
| C | -3.92039401 | -1.42648194 | -8.12936363  |
| C | -3.19557233 | -2.68191276 | -8.12936145  |
| C | -0.72482741 | -4.10840177 | -8.12936363  |
| C | 0.72481842  | -4.10840320 | -8.12936145  |
| C | 3.19556660  | -2.68191984 | -8.12936363  |
| C | 3.92039075  | -1.42649044 | -8.12936145  |
| C | 3.92039401  | 1.42648194  | -8.12936363  |
| C | 3.19557233  | 2.68191276  | -8.12936145  |
| C | 0.72482741  | 4.10840177  | -8.12936363  |
| C | -0.72481842 | 4.10840320  | -8.12936145  |
| C | -4.10377619 | 0.72064524  | -9.37829107  |
| C | -4.10377505 | -0.72064610 | -9.37824792  |
| C | -2.67598518 | -3.19365181 | -9.37829107  |
| C | -1.42778970 | -3.91429650 | -9.37824792  |
| C | 1.42779101  | -3.91429705 | -9.37829107  |
| C | 2.67598535  | -3.19365040 | -9.37824792  |
| C | 4.10377619  | -0.72064524 | -9.37829107  |
| C | 4.10377505  | 0.72064610  | -9.37824792  |
| C | 2.67598518  | 3.19365181  | -9.37829107  |
| C | 1.42778970  | 3.91429650  | -9.37824792  |
| C | -1.42779101 | 3.91429705  | -9.37829107  |
| C | -2.67598535 | 3.19365040  | -9.37824792  |
| C | -3.91387957 | -1.42779245 | -10.63341088 |
| C | -3.19343984 | -2.67562915 | -10.63339332 |
| C | -0.72043525 | -4.10341536 | -10.63341088 |
| C | 0.72044290  | -4.10341460 | -10.63339332 |
| C | 3.19344432  | -2.67562291 | -10.63341088 |
| C | 3.91388273  | -1.42778545 | -10.63339332 |
| C | 3.91387957  | 1.42779245  | -10.63341088 |
| C | 3.19343984  | 2.67562915  | -10.63339332 |
| C | 0.72043525  | 4.10341536  | -10.63341088 |

|   |             |             |              |
|---|-------------|-------------|--------------|
| C | -0.72044290 | 4.10341460  | -10.63339332 |
| C | -3.19344432 | 2.67562291  | -10.63341088 |
| C | -3.91388273 | 1.42778545  | -10.63339332 |
| C | -2.68203664 | -3.19534249 | -11.88236930 |
| C | -1.42621751 | -3.92038761 | -11.88241954 |
| C | 1.42622945  | -3.92038310 | -11.88236930 |
| C | 2.68204651  | -3.19533440 | -11.88241954 |
| C | 4.10826608  | -0.72504062 | -11.88236930 |
| C | 4.10826402  | 0.72505321  | -11.88241954 |
| C | 2.68203664  | 3.19534249  | -11.88236930 |
| C | 1.42621751  | 3.92038761  | -11.88241954 |
| C | -1.42622945 | 3.92038310  | -11.88236930 |
| C | -2.68204651 | 3.19533440  | -11.88241954 |
| C | -4.10826608 | 0.72504062  | -11.88236930 |
| C | -4.10826402 | -0.72505321 | -11.88241954 |
| C | -0.72148215 | -4.10414399 | -13.12920959 |
| C | 0.72148203  | -4.10414356 | -13.12929457 |
| C | 3.19355188  | -2.67689387 | -13.12920959 |
| C | 3.91503360  | -1.42725001 | -13.12929457 |
| C | 3.91503403  | 1.42725012  | -13.12920959 |
| C | 3.19355157  | 2.67689355  | -13.12929457 |
| C | 0.72148215  | 4.10414399  | -13.12920959 |
| C | -0.72148203 | 4.10414356  | -13.12929457 |
| C | -3.19355188 | 2.67689387  | -13.12920959 |
| C | -3.91503360 | 1.42725001  | -13.12929457 |
| C | -3.91503403 | -1.42725012 | -13.12920959 |
| C | -3.19355157 | -2.67689355 | -13.12929457 |
| C | 1.42825990  | -3.91178496 | -14.38453613 |
| C | 2.67356932  | -3.19280656 | -14.38458109 |
| C | 4.10183510  | -0.71898313 | -14.38453613 |
| C | 4.10183625  | 0.71897567  | -14.38458109 |
| C | 2.67357520  | 3.19280184  | -14.38453613 |
| C | 1.42826693  | 3.91178223  | -14.38458109 |
| C | -1.42825990 | 3.91178496  | -14.38453613 |
| C | -2.67356932 | 3.19280656  | -14.38458109 |
| C | -4.10183510 | 0.71898313  | -14.38453613 |
| C | -4.10183625 | -0.71897567 | -14.38458109 |
| C | -2.67357520 | -3.19280184 | -14.38453613 |
| C | -1.42826693 | -3.91178223 | -14.38458109 |
| C | 3.19538246  | -2.68210122 | -15.63601884 |
| C | 3.92045435  | -1.42624368 | -15.63597793 |
| C | 3.92045902  | 1.42623178  | -15.63601884 |
| C | 3.19539043  | 2.68209122  | -15.63597793 |
| C | 0.72507656  | 4.10833300  | -15.63601884 |
| C | -0.72506392 | 4.10833490  | -15.63597793 |
| C | -3.19538246 | 2.68210122  | -15.63601884 |
| C | -3.92045435 | 1.42624368  | -15.63597793 |
| C | -3.92045902 | -1.42623178 | -15.63601884 |
| C | -3.19539043 | -2.68209122 | -15.63597793 |
| C | -0.72507656 | -4.10833300 | -15.63601884 |
| C | 0.72506392  | -4.10833490 | -15.63597793 |
| C | 4.10197376  | -0.72267031 | -16.87991619 |
| C | 4.10197327  | 0.72267461  | -16.87982213 |
| C | 2.67683773  | 3.19107833  | -16.87991619 |
| C | 1.42513206  | 3.91375036  | -16.87982213 |
| C | -1.42513603 | 3.91374864  | -16.87991619 |
| C | -2.67684120 | 3.19107575  | -16.87982213 |
| C | -4.10197376 | 0.72267031  | -16.87991619 |
| C | -4.10197327 | -0.72267461 | -16.87982213 |
| C | -2.67683773 | -3.19107833 | -16.87991619 |
| C | -1.42513206 | -3.91375036 | -16.87982213 |
| C | 1.42513603  | -3.91374864 | -16.87991619 |
| C | 2.67684120  | -3.19107575 | -16.87982213 |
| C | 3.89680545  | 1.42430592  | -18.13480111 |
| C | 3.18188642  | 2.66258444  | -18.13473033 |
| C | 0.71491761  | 4.08688547  | -18.13480111 |
| C | -0.71492255 | 4.08688670  | -18.13473033 |
| C | -3.18188784 | 2.66257955  | -18.13480111 |
| C | -3.89680898 | 1.42430225  | -18.13473033 |
| C | -3.89680545 | -1.42430592 | -18.13480111 |

|   |             |             |              |
|---|-------------|-------------|--------------|
| C | -3.18188642 | -2.66258444 | -18.13473033 |
| C | -0.71491761 | -4.08688547 | -18.13480111 |
| C | 0.71492255  | -4.08688670 | -18.13473033 |
| C | 3.18188784  | -2.66257955 | -18.13480111 |
| C | 3.89680898  | -1.42430225 | -18.13473033 |
| C | 2.67828675  | 3.18630353  | -19.39511622 |
| C | 1.42026456  | 3.91262167  | -19.39511192 |
| C | -1.42027642 | 3.91261613  | -19.39511622 |
| C | -2.67829749 | 3.18629603  | -19.39511192 |
| C | -4.09856318 | 0.72631260  | -19.39511622 |
| C | -4.09856205 | -0.72632565 | -19.39511192 |
| C | -2.67828675 | -3.18630353 | -19.39511622 |
| C | -1.42026456 | -3.91262167 | -19.39511192 |
| C | 1.42027642  | -3.91261613 | -19.39511622 |
| C | 2.67829749  | -3.18629603 | -19.39511192 |
| C | 4.09856318  | -0.72631260 | -19.39511622 |
| C | 4.09856205  | 0.72632565  | -19.39511192 |
| C | 0.73385168  | 4.14619828  | -20.63546377 |
| C | -0.73385642 | 4.14619911  | -20.63551883 |
| C | -3.22378720 | 2.70863334  | -20.63546377 |
| C | -3.95764197 | 1.43756125  | -20.63551883 |
| C | -3.95763888 | -1.43756494 | -20.63546377 |
| C | -3.22378555 | -2.70863786 | -20.63551883 |
| C | -0.73385168 | -4.14619828 | -20.63546377 |
| C | 0.73385642  | -4.14619911 | -20.63551883 |
| C | 3.22378720  | -2.70863334 | -20.63546377 |
| C | 3.95764197  | -1.43756125 | -20.63551883 |
| C | 3.95763888  | 1.43756494  | -20.63546377 |
| C | 3.22378555  | 2.70863786  | -20.63551883 |
| C | -1.50713026 | 3.99315757  | -21.85201995 |
| C | -2.70461377 | 3.30179479  | -21.85209013 |
| C | -4.21174103 | 0.69136570  | -21.85201995 |
| C | -4.21174505 | -0.69136684 | -21.85209013 |
| C | -2.70461077 | -3.30179187 | -21.85201995 |
| C | -1.50713128 | -3.99316163 | -21.85209013 |
| C | 1.50713026  | -3.99315757 | -21.85201995 |
| C | 2.70461377  | -3.30179479 | -21.85209013 |
| C | 4.21174103  | -0.69136570 | -21.85201995 |
| C | 4.21174505  | 0.69136684  | -21.85209013 |
| C | 2.70461077  | 3.30179187  | -21.85201995 |
| C | 1.50713128  | 3.99316163  | -21.85209013 |
| H | -3.09122730 | 3.20154593  | 22.80774862  |
| H | -4.31823822 | 1.07629696  | 22.80777371  |
| H | -4.31823375 | -1.07630840 | 22.80774862  |
| H | -3.09121962 | -3.20155552 | 22.80777371  |
| H | -1.22700646 | -4.27785433 | 22.80774862  |
| H | 1.22701860  | -4.27785248 | 22.80777371  |
| H | 3.09122730  | -3.20154593 | 22.80774862  |
| H | 4.31823822  | -1.07629696 | 22.80777371  |
| H | 4.31823375  | 1.07630840  | 22.80774862  |
| H | 3.09121962  | 3.20155552  | 22.80777371  |
| H | 1.22700646  | 4.27785433  | 22.80774862  |
| H | -1.22701860 | 4.27785248  | 22.80777371  |
| H | -1.07629696 | 4.31823822  | -22.80777371 |
| H | -3.20154593 | 3.09122730  | -22.80774862 |
| H | -4.27785248 | 1.22701860  | -22.80777371 |
| H | -4.27785433 | -1.22700646 | -22.80774862 |
| H | -3.20155552 | -3.09121962 | -22.80777371 |
| H | -1.07630840 | -4.31823375 | -22.80774862 |
| H | 1.07629696  | -4.31823822 | -22.80777371 |
| H | 3.20154593  | -3.09122730 | -22.80774862 |
| H | 4.27785248  | -1.22701860 | -22.80777371 |
| H | 4.27785433  | 1.22700646  | -22.80774862 |
| H | 3.20155552  | 3.09121962  | -22.80777371 |
| H | 1.07630840  | 4.31823375  | -22.80774862 |

Nanotube (6,6) u18v6s  
B3LYP/STO-3G Energy: -16729.644751

|   |             |             |             |
|---|-------------|-------------|-------------|
| C | -3.89180221 | 1.76051181  | 22.45979968 |
| C | -4.25065549 | 0.42125315  | 22.45979968 |
| C | -3.47054906 | -2.49014368 | 22.45979968 |
| C | -2.49014368 | -3.47054906 | 22.45979968 |
| C | 0.42125315  | -4.25065549 | 22.45979968 |
| C | 1.76051181  | -3.89180221 | 22.45979968 |
| C | 3.89180221  | -1.76051181 | 22.45979968 |
| C | 4.25065549  | -0.42125315 | 22.45979968 |
| C | 3.47054906  | 2.49014368  | 22.45979968 |
| C | 2.49014368  | 3.47054906  | 22.45979968 |
| C | -0.42125315 | 4.25065549  | 22.45979968 |
| C | -1.76051181 | 3.89180221  | 22.45979968 |
| C | -4.20080399 | -0.36262328 | 21.24719291 |
| C | -3.81931462 | -1.78636102 | 21.24719291 |
| C | -1.78636102 | -3.81931462 | 21.24719291 |
| C | -0.36262328 | -4.20080399 | 21.24719291 |
| C | 2.41444297  | -3.45669133 | 21.24719291 |
| C | 3.45669133  | -2.41444297 | 21.24719291 |
| C | 4.20080399  | 0.36262328  | 21.24719291 |
| C | 3.81931462  | 1.78636102  | 21.24719291 |
| C | 1.78636102  | 3.81931462  | 21.24719291 |
| C | 0.36262328  | 4.20080399  | 21.24719291 |
| C | -2.41444297 | 3.45669133  | 21.24719291 |
| C | -3.45669133 | 2.41444297  | 21.24719291 |
| C | -3.41110619 | -2.38501933 | 20.00725621 |
| C | -2.38501933 | -3.41110619 | 20.00725621 |
| C | 0.35993423  | -4.14661428 | 20.00725621 |
| C | 1.76159495  | -3.77104042 | 20.00725621 |
| C | 3.77104042  | -1.76159495 | 20.00725621 |
| C | 4.14661428  | -0.35993423 | 20.00725621 |
| C | 3.41110619  | 2.38501933  | 20.00725621 |
| C | 2.38501933  | 3.41110619  | 20.00725621 |
| C | -0.35993423 | 4.14661428  | 20.00725621 |
| C | -1.76159495 | 3.77104042  | 20.00725621 |
| C | -3.77104042 | 1.76159495  | 20.00725621 |
| C | -4.14661428 | 0.35993423  | 20.00725621 |
| C | -1.75027165 | -3.76477749 | 18.74464489 |
| C | -0.36660903 | -4.13552877 | 18.74464489 |
| C | 2.38525712  | -3.39816846 | 18.74464489 |
| C | 3.39816846  | -2.38525712 | 18.74464489 |
| C | 4.13552877  | 0.36660903  | 18.74464489 |
| C | 3.76477749  | 1.75027165  | 18.74464489 |
| C | 1.75027165  | 3.76477749  | 18.74464489 |
| C | 0.36660903  | 4.13552877  | 18.74464489 |
| C | -2.38525712 | 3.39816846  | 18.74464489 |
| C | -3.39816846 | 2.38525712  | 18.74464489 |
| C | -4.13552877 | -0.36660903 | 18.74464489 |
| C | -3.76477749 | -1.75027165 | 18.74464489 |
| C | 0.36168447  | -4.15519511 | 17.49407125 |
| C | 1.76436962  | -3.77934676 | 17.49407125 |
| C | 3.77934676  | -1.76436962 | 17.49407125 |
| C | 4.15519511  | -0.36168447 | 17.49407125 |
| C | 3.41766229  | 2.39082549  | 17.49407125 |
| C | 2.39082549  | 3.41766229  | 17.49407125 |
| C | -0.36168447 | 4.15519511  | 17.49407125 |
| C | -1.76436962 | 3.77934676  | 17.49407125 |
| C | -3.77934676 | 1.76436962  | 17.49407125 |
| C | -4.15519511 | 0.36168447  | 17.49407125 |
| C | -3.41766229 | -2.39082549 | 17.49407125 |
| C | -2.39082549 | -3.41766229 | 17.49407125 |
| C | 2.39305964  | -3.41723409 | 16.25133505 |
| C | 3.41723409  | -2.39305964 | 16.25133505 |
| C | 4.15594135  | 0.36383340  | 16.25133505 |
| C | 3.78106748  | 1.76288171  | 16.25133505 |
| C | 1.76288171  | 3.78106748  | 16.25133505 |
| C | 0.36383340  | 4.15594135  | 16.25133505 |
| C | -2.39305964 | 3.41723409  | 16.25133505 |
| C | -3.41723409 | 2.39305964  | 16.25133505 |
| C | -4.15594135 | -0.36383340 | 16.25133505 |

|   |             |             |             |
|---|-------------|-------------|-------------|
| C | -3.78106748 | -1.76288171 | 16.25133505 |
| C | -1.76288171 | -3.78106748 | 16.25133505 |
| C | -0.36383340 | -4.15594135 | 16.25133505 |
| C | 3.77804064  | -1.75753826 | 14.99666770 |
| C | 4.15064830  | -0.36694754 | 14.99666770 |
| C | 3.41109310  | 2.39311004  | 14.99666770 |
| C | 2.39311004  | 3.41109310  | 14.99666770 |
| C | -0.36694754 | 4.15064830  | 14.99666770 |
| C | -1.75753826 | 3.77804064  | 14.99666770 |
| C | -3.77804064 | 1.75753826  | 14.99666770 |
| C | -4.15064830 | 0.36694754  | 14.99666770 |
| C | -3.41109310 | -2.39311004 | 14.99666770 |
| C | -2.39311004 | -3.41109310 | 14.99666770 |
| C | 0.36694754  | -4.15064830 | 14.99666770 |
| C | 1.75753826  | -3.77804064 | 14.99666770 |
| C | 4.15790276  | 0.36297935  | 13.74560626 |
| C | 3.78233910  | 1.76460204  | 13.74560626 |
| C | 1.76460204  | 3.78233910  | 13.74560626 |
| C | 0.36297935  | 4.15790276  | 13.74560626 |
| C | -2.39330072 | 3.41935974  | 13.74560626 |
| C | -3.41935974 | 2.39330072  | 13.74560626 |
| C | -4.15790276 | -0.36297935 | 13.74560626 |
| C | -3.78233910 | -1.76460204 | 13.74560626 |
| C | -1.76460204 | -3.78233910 | 13.74560626 |
| C | -0.36297935 | -4.15790276 | 13.74560626 |
| C | 2.39330072  | -3.41935974 | 13.74560626 |
| C | 3.41935974  | -2.39330072 | 13.74560626 |
| C | 3.41703833  | 2.39286568  | 12.50092002 |
| C | 2.39286568  | 3.41703833  | 12.50092002 |
| C | -0.36376330 | 4.15567484  | 12.50092002 |
| C | -1.76280916 | 3.78080163  | 12.50092002 |
| C | -3.78080163 | 1.76280916  | 12.50092002 |
| C | -4.15567484 | 0.36376330  | 12.50092002 |
| C | -3.41703833 | -2.39286568 | 12.50092002 |
| C | -2.39286568 | -3.41703833 | 12.50092002 |
| C | 0.36376330  | -4.15567484 | 12.50092002 |
| C | 1.76280916  | -3.78080163 | 12.50092002 |
| C | 3.78080163  | -1.76280916 | 12.50092002 |
| C | 4.15567484  | -0.36376330 | 12.50092002 |
| C | 1.75832928  | 3.77807777  | 11.24770795 |
| C | 0.36628106  | 4.15107597  | 11.24770795 |
| C | -2.39274669 | 3.41179671  | 11.24770795 |
| C | -3.41179671 | 2.39274669  | 11.24770795 |
| C | -4.15107597 | -0.36628106 | 11.24770795 |
| C | -3.77807777 | -1.75832928 | 11.24770795 |
| C | -1.75832928 | -3.77807777 | 11.24770795 |
| C | -0.36628106 | -4.15107597 | 11.24770795 |
| C | 2.39274669  | -3.41179671 | 11.24770795 |
| C | 3.41179671  | -2.39274669 | 11.24770795 |
| C | 4.15107597  | 0.36628106  | 11.24770795 |
| C | 3.77807777  | 1.75832928  | 11.24770795 |
| C | -0.36345173 | 4.15785850  | 9.99645820  |
| C | -1.76417082 | 3.78253695  | 9.99645820  |
| C | -3.78253695 | 1.76417082  | 9.99645820  |
| C | -4.15785850 | 0.36345173  | 9.99645820  |
| C | -3.41908522 | -2.39368768 | 9.99645820  |
| C | -2.39368768 | -3.41908522 | 9.99645820  |
| C | 0.36345173  | -4.15785850 | 9.99645820  |
| C | 1.76417082  | -3.78253695 | 9.99645820  |
| C | 3.78253695  | -1.76417082 | 9.99645820  |
| C | 4.15785850  | -0.36345173 | 9.99645820  |
| C | 3.41908522  | 2.39368768  | 9.99645820  |
| C | 2.39368768  | 3.41908522  | 9.99645820  |
| C | -2.39342744 | 3.41781669  | 8.75133931  |
| C | -3.41781669 | 2.39342744  | 8.75133931  |
| C | -4.15662979 | -0.36386062 | 8.75133931  |
| C | -3.78167730 | -1.76320236 | 8.75133931  |
| C | -1.76320236 | -3.78167730 | 8.75133931  |
| C | -0.36386062 | -4.15662979 | 8.75133931  |
| C | 2.39342744  | -3.41781669 | 8.75133931  |

|   |             |             |            |
|---|-------------|-------------|------------|
| C | 3.41781669  | -2.39342744 | 8.75133931 |
| C | 4.15662979  | 0.36386062  | 8.75133931 |
| C | 3.78167730  | 1.76320236  | 8.75133931 |
| C | 1.76320236  | 3.78167730  | 8.75133931 |
| C | 0.36386062  | 4.15662979  | 8.75133931 |
| C | -3.77826062 | 1.75868152  | 7.49881845 |
| C | -4.15141044 | 0.36606743  | 7.49881845 |
| C | -3.41219318 | -2.39272892 | 7.49881845 |
| C | -2.39272892 | -3.41219318 | 7.49881845 |
| C | 0.36606743  | -4.15141044 | 7.49881845 |
| C | 1.75868152  | -3.77826062 | 7.49881845 |
| C | 3.77826062  | -1.75868152 | 7.49881845 |
| C | 4.15141044  | -0.36606743 | 7.49881845 |
| C | 3.41219318  | 2.39272892  | 7.49881845 |
| C | 2.39272892  | 3.41219318  | 7.49881845 |
| C | -0.36606743 | 4.15141044  | 7.49881845 |
| C | -1.75868152 | 3.77826062  | 7.49881845 |
| C | -4.15691235 | -0.36353339 | 6.24719371 |
| C | -3.78175839 | -1.76362702 | 6.24719371 |
| C | -1.76362702 | -3.78175839 | 6.24719371 |
| C | -0.36353339 | -4.15691235 | 6.24719371 |
| C | 2.39328533  | -3.41822500 | 6.24719371 |
| C | 3.41822500  | -2.39328533 | 6.24719371 |
| C | 4.15691235  | 0.36353339  | 6.24719371 |
| C | 3.78175839  | 1.76362702  | 6.24719371 |
| C | 1.76362702  | 3.78175839  | 6.24719371 |
| C | 0.36353339  | 4.15691235  | 6.24719371 |
| C | -2.39328533 | 3.41822500  | 6.24719371 |
| C | -3.41822500 | 2.39328533  | 6.24719371 |
| C | -3.41805467 | -2.39349922 | 5.00139558 |
| C | -2.39349922 | -3.41805467 | 5.00139558 |
| C | 0.36380379  | -4.15687178 | 5.00139558 |
| C | 1.76337256  | -3.78185846 | 5.00139558 |
| C | 3.78185846  | -1.76337256 | 5.00139558 |
| C | 4.15687178  | -0.36380379 | 5.00139558 |
| C | 3.41805467  | 2.39349922  | 5.00139558 |
| C | 2.39349922  | 3.41805467  | 5.00139558 |
| C | -0.36380379 | 4.15687178  | 5.00139558 |
| C | -1.76337256 | 3.78185846  | 5.00139558 |
| C | -3.78185846 | 1.76337256  | 5.00139558 |
| C | -4.15687178 | 0.36380379  | 5.00139558 |
| C | -1.75908683 | -3.77906388 | 3.74919571 |
| C | -0.36611806 | -4.15230874 | 3.74919571 |
| C | 2.39322191  | -3.41294582 | 3.74919571 |
| C | 3.41294582  | -2.39322191 | 3.74919571 |
| C | 4.15230874  | 0.36611806  | 3.74919571 |
| C | 3.77906388  | 1.75908683  | 3.74919571 |
| C | 1.75908683  | 3.77906388  | 3.74919571 |
| C | 0.36611806  | 4.15230874  | 3.74919571 |
| C | -2.39322191 | 3.41294582  | 3.74919571 |
| C | -3.41294582 | 2.39322191  | 3.74919571 |
| C | -4.15230874 | -0.36611806 | 3.74919571 |
| C | -3.77906388 | -1.75908683 | 3.74919571 |
| C | 0.36374868  | -4.15704177 | 2.49748056 |
| C | 1.76350529  | -3.78197811 | 2.49748056 |
| C | 3.78197811  | -1.76350529 | 2.49748056 |
| C | 4.15704177  | -0.36374868 | 2.49748056 |
| C | 3.41822943  | 2.39353648  | 2.49748056 |
| C | 2.39353648  | 3.41822943  | 2.49748056 |
| C | -0.36374868 | 4.15704177  | 2.49748056 |
| C | -1.76350529 | 3.78197811  | 2.49748056 |
| C | -3.78197811 | 1.76350529  | 2.49748056 |
| C | -4.15704177 | 0.36374868  | 2.49748056 |
| C | -3.41822943 | -2.39353648 | 2.49748056 |
| C | -2.39353648 | -3.41822943 | 2.49748056 |
| C | 2.39351339  | -3.41807749 | 1.25177861 |
| C | 3.41807749  | -2.39351339 | 1.25177861 |
| C | 4.15689864  | 0.36380465  | 1.25177861 |
| C | 3.78188215  | 1.76338524  | 1.25177861 |
| C | 1.76338524  | 3.78188215  | 1.25177861 |

|   |             |             |             |
|---|-------------|-------------|-------------|
| C | 0.36380465  | 4.15689864  | 1.25177861  |
| C | -2.39351339 | 3.41807749  | 1.25177861  |
| C | -3.41807749 | 2.39351339  | 1.25177861  |
| C | -4.15689864 | -0.36380465 | 1.25177861  |
| C | -3.78188215 | -1.76338524 | 1.25177861  |
| C | -1.76338524 | -3.78188215 | 1.25177861  |
| C | -0.36380465 | -4.15689864 | 1.25177861  |
| C | 3.77904812  | -1.75908034 | 0.00000000  |
| C | 4.15229184  | -0.36611580 | 0.00000000  |
| C | 3.41293232  | 2.39321150  | 0.00000000  |
| C | 2.39321150  | 3.41293232  | 0.00000000  |
| C | -0.36611580 | 4.15229184  | 0.00000000  |
| C | -1.75908034 | 3.77904812  | 0.00000000  |
| C | -3.77904812 | 1.75908034  | 0.00000000  |
| C | -4.15229184 | 0.36611580  | 0.00000000  |
| C | -3.41293232 | -2.39321150 | 0.00000000  |
| C | -2.39321150 | -3.41293232 | 0.00000000  |
| C | 0.36611580  | -4.15229184 | 0.00000000  |
| C | 1.75908034  | -3.77904812 | 0.00000000  |
| C | 4.15689864  | 0.36380465  | -1.25177861 |
| C | 3.78188215  | 1.76338524  | -1.25177861 |
| C | 1.76338524  | 3.78188215  | -1.25177861 |
| C | 0.36380465  | 4.15689864  | -1.25177861 |
| C | -2.39351339 | 3.41807749  | -1.25177861 |
| C | -3.41807749 | 2.39351339  | -1.25177861 |
| C | -4.15689864 | -0.36380465 | -1.25177861 |
| C | -3.78188215 | -1.76338524 | -1.25177861 |
| C | -1.76338524 | -3.78188215 | -1.25177861 |
| C | -0.36380465 | -4.15689864 | -1.25177861 |
| C | 2.39351339  | -3.41807749 | -1.25177861 |
| C | 3.41807749  | -2.39351339 | -1.25177861 |
| C | 3.41822943  | 2.39353648  | -2.49748056 |
| C | 2.39353648  | 3.41822943  | -2.49748056 |
| C | -0.36374868 | 4.15704177  | -2.49748056 |
| C | -1.76350529 | 3.78197811  | -2.49748056 |
| C | -3.78197811 | 1.76350529  | -2.49748056 |
| C | -4.15704177 | 0.36374868  | -2.49748056 |
| C | -3.41822943 | -2.39353648 | -2.49748056 |
| C | -2.39353648 | -3.41822943 | -2.49748056 |
| C | 0.36374868  | -4.15704177 | -2.49748056 |
| C | 1.76350529  | -3.78197811 | -2.49748056 |
| C | 3.78197811  | -1.76350529 | -2.49748056 |
| C | 4.15704177  | -0.36374868 | -2.49748056 |
| C | 1.75908683  | 3.77906388  | -3.74919571 |
| C | 0.36611806  | 4.15230874  | -3.74919571 |
| C | -2.39322191 | 3.41294582  | -3.74919571 |
| C | -3.41294582 | 2.39322191  | -3.74919571 |
| C | -4.15230874 | -0.36611806 | -3.74919571 |
| C | -3.77906388 | -1.75908683 | -3.74919571 |
| C | -1.75908683 | -3.77906388 | -3.74919571 |
| C | -0.36611806 | -4.15230874 | -3.74919571 |
| C | 2.39322191  | -3.41294582 | -3.74919571 |
| C | 3.41294582  | -2.39322191 | -3.74919571 |
| C | 4.15230874  | 0.36611806  | -3.74919571 |
| C | 3.77906388  | 1.75908683  | -3.74919571 |
| C | -0.36380379 | 4.15687178  | -5.00139558 |
| C | -1.76337256 | 3.78185846  | -5.00139558 |
| C | -3.78185846 | 1.76337256  | -5.00139558 |
| C | -4.15687178 | 0.36380379  | -5.00139558 |
| C | -3.41805467 | -2.39349922 | -5.00139558 |
| C | -2.39349922 | -3.41805467 | -5.00139558 |
| C | 0.36380379  | -4.15687178 | -5.00139558 |
| C | 1.76337256  | -3.78185846 | -5.00139558 |
| C | 3.78185846  | -1.76337256 | -5.00139558 |
| C | 4.15687178  | -0.36380379 | -5.00139558 |
| C | 3.41805467  | 2.39349922  | -5.00139558 |
| C | 2.39349922  | 3.41805467  | -5.00139558 |
| C | -2.39328533 | 3.41822500  | -6.24719371 |
| C | -3.41822500 | 2.39328533  | -6.24719371 |
| C | -4.15691235 | -0.36353339 | -6.24719371 |

|   |             |             |              |
|---|-------------|-------------|--------------|
| C | -3.78175839 | -1.76362702 | -6.24719371  |
| C | -1.76362702 | -3.78175839 | -6.24719371  |
| C | -0.36353339 | -4.15691235 | -6.24719371  |
| C | 2.39328533  | -3.41822500 | -6.24719371  |
| C | 3.41822500  | -2.39328533 | -6.24719371  |
| C | 4.15691235  | 0.36353339  | -6.24719371  |
| C | 3.78175839  | 1.76362702  | -6.24719371  |
| C | 1.76362702  | 3.78175839  | -6.24719371  |
| C | 0.36353339  | 4.15691235  | -6.24719371  |
| C | -3.77826062 | 1.75868152  | -7.49881845  |
| C | -4.15141044 | 0.36606743  | -7.49881845  |
| C | -3.41219318 | -2.39272892 | -7.49881845  |
| C | -2.39272892 | -3.41219318 | -7.49881845  |
| C | 0.36606743  | -4.15141044 | -7.49881845  |
| C | 1.75868152  | -3.77826062 | -7.49881845  |
| C | 3.77826062  | -1.75868152 | -7.49881845  |
| C | 4.15141044  | -0.36606743 | -7.49881845  |
| C | 3.41219318  | 2.39272892  | -7.49881845  |
| C | 2.39272892  | 3.41219318  | -7.49881845  |
| C | -0.36606743 | 4.15141044  | -7.49881845  |
| C | -1.75868152 | 3.77826062  | -7.49881845  |
| C | -4.15662979 | -0.36386062 | -8.75133931  |
| C | -3.78167730 | -1.76320236 | -8.75133931  |
| C | -1.76320236 | -3.78167730 | -8.75133931  |
| C | -0.36386062 | -4.15662979 | -8.75133931  |
| C | 2.39342744  | -3.41781669 | -8.75133931  |
| C | 3.41781669  | -2.39342744 | -8.75133931  |
| C | 4.15662979  | 0.36386062  | -8.75133931  |
| C | 3.78167730  | 1.76320236  | -8.75133931  |
| C | 1.76320236  | 3.78167730  | -8.75133931  |
| C | 0.36386062  | 4.15662979  | -8.75133931  |
| C | -2.39342744 | 3.41781669  | -8.75133931  |
| C | -3.41781669 | 2.39342744  | -8.75133931  |
| C | -3.41908522 | -2.39368768 | -9.99645820  |
| C | -2.39368768 | -3.41908522 | -9.99645820  |
| C | 0.36345173  | -4.15785850 | -9.99645820  |
| C | 1.76417082  | -3.78253695 | -9.99645820  |
| C | 3.78253695  | -1.76417082 | -9.99645820  |
| C | 4.15785850  | -0.36345173 | -9.99645820  |
| C | 3.41908522  | 2.39368768  | -9.99645820  |
| C | 2.39368768  | 3.41908522  | -9.99645820  |
| C | -0.36345173 | 4.15785850  | -9.99645820  |
| C | -1.76417082 | 3.78253695  | -9.99645820  |
| C | -3.78253695 | 1.76417082  | -9.99645820  |
| C | -4.15785850 | 0.36345173  | -9.99645820  |
| C | -1.75832928 | -3.77807777 | -11.24770795 |
| C | -0.36628106 | -4.15107597 | -11.24770795 |
| C | 2.39274669  | -3.41179671 | -11.24770795 |
| C | 3.41179671  | -2.39274669 | -11.24770795 |
| C | 4.15107597  | 0.36628106  | -11.24770795 |
| C | 3.77807777  | 1.75832928  | -11.24770795 |
| C | 1.75832928  | 3.77807777  | -11.24770795 |
| C | 0.36628106  | 4.15107597  | -11.24770795 |
| C | -2.39274669 | 3.41179671  | -11.24770795 |
| C | -3.41179671 | 2.39274669  | -11.24770795 |
| C | -4.15107597 | -0.36628106 | -11.24770795 |
| C | -3.77807777 | -1.75832928 | -11.24770795 |
| C | 0.36376330  | -4.15567484 | -12.50092002 |
| C | 1.76280916  | -3.78080163 | -12.50092002 |
| C | 3.78080163  | -1.76280916 | -12.50092002 |
| C | 4.15567484  | -0.36376330 | -12.50092002 |
| C | 3.41703833  | 2.39286568  | -12.50092002 |
| C | 2.39286568  | 3.41703833  | -12.50092002 |
| C | -0.36376330 | 4.15567484  | -12.50092002 |
| C | -1.76280916 | 3.78080163  | -12.50092002 |
| C | -3.78080163 | 1.76280916  | -12.50092002 |
| C | -4.15567484 | 0.36376330  | -12.50092002 |
| C | -3.41703833 | -2.39286568 | -12.50092002 |
| C | -2.39286568 | -3.41703833 | -12.50092002 |
| C | 2.39330072  | -3.41935974 | -13.74560626 |



|   |             |             |              |
|---|-------------|-------------|--------------|
| C | 3.41935974  | -2.39330072 | -13.74560626 |
| C | 4.15790276  | 0.36297935  | -13.74560626 |
| C | 3.78233910  | 1.76460204  | -13.74560626 |
| C | 1.76460204  | 3.78233910  | -13.74560626 |
| C | 0.36297935  | 4.15790276  | -13.74560626 |
| C | -2.39330072 | 3.41935974  | -13.74560626 |
| C | -3.41935974 | 2.39330072  | -13.74560626 |
| C | -4.15790276 | -0.36297935 | -13.74560626 |
| C | -3.78233910 | -1.76460204 | -13.74560626 |
| C | -1.76460204 | -3.78233910 | -13.74560626 |
| C | -0.36297935 | -4.15790276 | -13.74560626 |
| C | 3.77804064  | -1.75753826 | -14.99666770 |
| C | 4.15064830  | -0.36694754 | -14.99666770 |
| C | 3.41109310  | 2.39311004  | -14.99666770 |
| C | 2.39311004  | 3.41109310  | -14.99666770 |
| C | -0.36694754 | 4.15064830  | -14.99666770 |
| C | -1.75753826 | 3.77804064  | -14.99666770 |
| C | -3.77804064 | 1.75753826  | -14.99666770 |
| C | -4.15064830 | 0.36694754  | -14.99666770 |
| C | -3.41109310 | -2.39311004 | -14.99666770 |
| C | -2.39311004 | -3.41109310 | -14.99666770 |
| C | 0.36694754  | -4.15064830 | -14.99666770 |
| C | 1.75753826  | -3.77804064 | -14.99666770 |
| C | 4.15594135  | 0.36383340  | -16.25133505 |
| C | 3.78106748  | 1.76288171  | -16.25133505 |
| C | 1.76288171  | 3.78106748  | -16.25133505 |
| C | 0.36383340  | 4.15594135  | -16.25133505 |
| C | -2.39305964 | 3.41723409  | -16.25133505 |
| C | -3.41723409 | 2.39305964  | -16.25133505 |
| C | -4.15594135 | -0.36383340 | -16.25133505 |
| C | -3.78106748 | -1.76288171 | -16.25133505 |
| C | -1.76288171 | -3.78106748 | -16.25133505 |
| C | -0.36383340 | -4.15594135 | -16.25133505 |
| C | 2.39305964  | -3.41723409 | -16.25133505 |
| C | 3.41723409  | -2.39305964 | -16.25133505 |
| C | 3.41766229  | 2.39082549  | -17.49407125 |
| C | 2.39082549  | 3.41766229  | -17.49407125 |
| C | -0.36168447 | 4.15519511  | -17.49407125 |
| C | -1.76436962 | 3.77934676  | -17.49407125 |
| C | -3.77934676 | 1.76436962  | -17.49407125 |
| C | -4.15519511 | 0.36168447  | -17.49407125 |
| C | -3.41766229 | -2.39082549 | -17.49407125 |
| C | -2.39082549 | -3.41766229 | -17.49407125 |
| C | 0.36168447  | -4.15519511 | -17.49407125 |
| C | 1.76436962  | -3.77934676 | -17.49407125 |
| C | 3.77934676  | -1.76436962 | -17.49407125 |
| C | 4.15519511  | -0.36168447 | -17.49407125 |
| C | 1.75027165  | 3.76477749  | -18.74464489 |
| C | 0.36660903  | 4.13552877  | -18.74464489 |
| C | -2.38525712 | 3.39816846  | -18.74464489 |
| C | -3.39816846 | 2.38525712  | -18.74464489 |
| C | -4.13552877 | -0.36660903 | -18.74464489 |
| C | -3.76477749 | -1.75027165 | -18.74464489 |
| C | -1.75027165 | -3.76477749 | -18.74464489 |
| C | -0.36660903 | -4.13552877 | -18.74464489 |
| C | 2.38525712  | -3.39816846 | -18.74464489 |
| C | 3.39816846  | -2.38525712 | -18.74464489 |
| C | 4.13552877  | 0.36660903  | -18.74464489 |
| C | 3.76477749  | 1.75027165  | -18.74464489 |
| C | -0.35993423 | 4.14661428  | -20.00725621 |
| C | -1.76159495 | 3.77104042  | -20.00725621 |
| C | -3.77104042 | 1.76159495  | -20.00725621 |
| C | -4.14661428 | 0.35993423  | -20.00725621 |
| C | -3.41110619 | -2.38501933 | -20.00725621 |
| C | -2.38501933 | -3.41110619 | -20.00725621 |
| C | 0.35993423  | -4.14661428 | -20.00725621 |
| C | 1.76159495  | -3.77104042 | -20.00725621 |
| C | 3.77104042  | -1.76159495 | -20.00725621 |
| C | 4.14661428  | -0.35993423 | -20.00725621 |
| C | 3.41110619  | 2.38501933  | -20.00725621 |

|   |             |             |              |
|---|-------------|-------------|--------------|
| C | 2.38501933  | 3.41110619  | -20.00725621 |
| C | -2.41444297 | 3.45669133  | -21.24719291 |
| C | -3.45669133 | 2.41444297  | -21.24719291 |
| C | -4.20080399 | -0.36262328 | -21.24719291 |
| C | -3.81931462 | -1.78636102 | -21.24719291 |
| C | -1.78636102 | -3.81931462 | -21.24719291 |
| C | -0.36262328 | -4.20080399 | -21.24719291 |
| C | 2.41444297  | -3.45669133 | -21.24719291 |
| C | 3.45669133  | -2.41444297 | -21.24719291 |
| C | 4.20080399  | 0.36262328  | -21.24719291 |
| C | 3.81931462  | 1.78636102  | -21.24719291 |
| C | 1.78636102  | 3.81931462  | -21.24719291 |
| C | 0.36262328  | 4.20080399  | -21.24719291 |
| C | -3.89180221 | 1.76051181  | -22.45979968 |
| C | -4.25065549 | 0.42125315  | -22.45979968 |
| C | -3.47054906 | -2.49014368 | -22.45979968 |
| C | -2.49014368 | -3.47054906 | -22.45979968 |
| C | 0.42125315  | -4.25065549 | -22.45979968 |
| C | 1.76051181  | -3.89180221 | -22.45979968 |
| C | 3.89180221  | -1.76051181 | -22.45979968 |
| C | 4.25065549  | -0.42125315 | -22.45979968 |
| C | 3.47054906  | 2.49014368  | -22.45979968 |
| C | 2.49014368  | 3.47054906  | -22.45979968 |
| C | -0.42125315 | 4.25065549  | -22.45979968 |
| C | -1.76051181 | 3.89180221  | -22.45979968 |
| H | -3.81002485 | 2.29025767  | 23.41758032  |
| H | -4.44470715 | -0.07840889 | 23.41758032  |
| H | -3.88843375 | -2.15444948 | 23.41758032  |
| H | -2.15444948 | -3.88843375 | 23.41758032  |
| H | -0.07840889 | -4.44470715 | 23.41758032  |
| H | 2.29025767  | -3.81002485 | 23.41758032  |
| H | 3.81002485  | -2.29025767 | 23.41758032  |
| H | 4.44470715  | 0.07840889  | 23.41758032  |
| H | 3.88843375  | 2.15444948  | 23.41758032  |
| H | 2.15444948  | 3.88843375  | 23.41758032  |
| H | 0.07840889  | 4.44470715  | 23.41758032  |
| H | -2.29025767 | 3.81002485  | 23.41758032  |
| H | -3.81002485 | 2.29025767  | -23.41758032 |
| H | -4.44470715 | -0.07840889 | -23.41758032 |
| H | -3.88843375 | -2.15444948 | -23.41758032 |
| H | -2.15444948 | -3.88843375 | -23.41758032 |
| H | -0.07840889 | -4.44470715 | -23.41758032 |
| H | 2.29025767  | -3.81002485 | -23.41758032 |
| H | 3.81002485  | -2.29025767 | -23.41758032 |
| H | 4.44470715  | 0.07840889  | -23.41758032 |
| H | 3.88843375  | 2.15444948  | -23.41758032 |
| H | 2.15444948  | 3.88843375  | -23.41758032 |
| H | 0.07840889  | 4.44470715  | -23.41758032 |
| H | -2.29025767 | 3.81002485  | -23.41758032 |

Nanotube (6,6) u19v0s  
B3LYP/STO-3G Energy: -17181.424719

|   |             |             |             |
|---|-------------|-------------|-------------|
| C | -3.30277381 | 2.70631546  | 23.09331804 |
| C | -3.99513220 | 1.50713044  | 23.09335005 |
| C | -3.99512484 | -1.50712829 | 23.09331804 |
| C | -3.30277935 | -2.70632076 | 23.09335005 |
| C | -0.69235103 | -4.21344375 | 23.09331804 |
| C | 0.69235285  | -4.21345120 | 23.09335005 |
| C | 3.30277381  | -2.70631546 | 23.09331804 |
| C | 3.99513220  | -1.50713044 | 23.09335005 |
| C | 3.99512484  | 1.50712829  | 23.09331804 |
| C | 3.30277935  | 2.70632076  | 23.09335005 |
| C | 0.69235103  | 4.21344375  | 23.09331804 |
| C | -0.69235285 | 4.21345120  | 23.09335005 |
| C | -4.14922149 | 0.73561941  | 21.87877808 |
| C | -4.14922134 | -0.73563299 | 21.87876913 |
| C | -2.71167585 | -3.22552151 | 21.87877808 |

|   |             |             |             |
|---|-------------|-------------|-------------|
| C | -1.43753381 | -3.96114758 | 21.87876913 |
| C | 1.43754565  | -3.96114093 | 21.87877808 |
| C | 2.71168752  | -3.22551459 | 21.87876913 |
| C | 4.14922149  | -0.73561941 | 21.87877808 |
| C | 4.14922134  | 0.73563299  | 21.87876913 |
| C | 2.71167585  | 3.22552151  | 21.87877808 |
| C | 1.43753381  | 3.96114758  | 21.87876913 |
| C | -1.43754565 | 3.96114093  | 21.87877808 |
| C | -2.71168752 | 3.22551459  | 21.87876913 |
| C | -3.91261663 | -1.42070873 | 20.63880173 |
| C | -3.18667195 | -2.67807585 | 20.63872867 |
| C | -0.72593847 | -4.09877976 | 20.63880173 |
| C | 0.72594575  | -4.09877679 | 20.63872867 |
| C | 3.18667817  | -2.67807103 | 20.63880173 |
| C | 3.91261770  | -1.42070094 | 20.63872867 |
| C | 3.91261663  | 1.42070873  | 20.63880173 |
| C | 3.18667195  | 2.67807585  | 20.63872867 |
| C | 0.72593847  | 4.09877976  | 20.63880173 |
| C | -0.72594575 | 4.09877679  | 20.63872867 |
| C | -3.18667817 | 2.67807103  | 20.63880173 |
| C | -3.91261770 | 1.42070094  | 20.63872867 |
| C | -2.66377886 | -3.18270660 | 19.37712787 |
| C | -1.42441353 | -3.89825450 | 19.37702880 |
| C | 1.42441534  | -3.89825346 | 19.37712787 |
| C | 2.66378067  | -3.18270555 | 19.37702880 |
| C | 4.08819420  | -0.71554686 | 19.37712787 |
| C | 4.08819419  | 0.71554895  | 19.37702880 |
| C | 2.66377886  | 3.18270660  | 19.37712787 |
| C | 1.42441353  | 3.89825450  | 19.37702880 |
| C | -1.42441534 | 3.89825346  | 19.37712787 |
| C | -2.66378067 | 3.18270555  | 19.37702880 |
| C | -4.08819420 | 0.71554686  | 19.37712787 |
| C | -4.08819419 | -0.71554895 | 19.37702880 |
| C | -0.72459369 | -4.10503243 | 18.12430521 |
| C | 0.72458747  | -4.10503509 | 18.12424230 |
| C | 3.19276552  | -2.68003275 | 18.12430521 |
| C | 3.91735841  | -1.42500639 | 18.12424230 |
| C | 3.91735921  | 1.42499967  | 18.12430521 |
| C | 3.19277094  | 2.68002870  | 18.12424230 |
| C | 0.72459369  | 4.10503243  | 18.12430521 |
| C | -0.72458747 | 4.10503509  | 18.12424230 |
| C | -3.19276552 | 2.68003275  | 18.12430521 |
| C | -3.91735841 | 1.42500639  | 18.12424230 |
| C | -3.91735921 | -1.42499967 | 18.12430521 |
| C | -3.19277094 | -2.68002870 | 18.12424230 |
| C | 1.42670310  | -3.92059774 | 16.88129334 |
| C | 2.68197764  | -3.19586626 | 16.88131448 |
| C | 4.10868879  | -0.72473774 | 16.88129334 |
| C | 4.10869019  | 0.72472763  | 16.88131448 |
| C | 2.68198569  | 3.19586000  | 16.88129334 |
| C | 1.42671255  | 3.92059390  | 16.88131448 |
| C | -1.42670310 | 3.92059774  | 16.88129334 |
| C | -2.68197764 | 3.19586626  | 16.88131448 |
| C | -4.10868879 | 0.72473774  | 16.88129334 |
| C | -4.10869019 | -0.72472763 | 16.88131448 |
| C | -2.68198569 | -3.19586000 | 16.88129334 |
| C | -1.42671255 | -3.92059390 | 16.88131448 |
| C | 3.19360199  | -2.67425884 | 15.62800630 |
| C | 3.91277591  | -1.42861482 | 15.62810206 |
| C | 3.91277709  | 1.42861103  | 15.62800630 |
| C | 3.19360468  | 2.67425592  | 15.62810206 |
| C | 0.71917510  | 4.10286987  | 15.62800630 |
| C | -0.71917123 | 4.10287074  | 15.62810206 |
| C | -3.19360199 | 2.67425884  | 15.62800630 |
| C | -3.91277591 | 1.42861482  | 15.62810206 |
| C | -3.91277709 | -1.42861103 | 15.62800630 |
| C | -3.19360468 | -2.67425592 | 15.62810206 |
| C | -0.71917510 | -4.10286987 | 15.62800630 |
| C | 0.71917123  | -4.10287074 | 15.62810206 |
| C | 4.10743010  | -0.72376172 | 14.37460576 |

|   |             |             |             |
|---|-------------|-------------|-------------|
| C | 4.10742982  | 0.72376696  | 14.37470695 |
| C | 2.68051109  | 3.19525795  | 14.37460576 |
| C | 1.42691433  | 3.91902205  | 14.37470695 |
| C | -1.42691901 | 3.91901967  | 14.37460576 |
| C | -2.68051549 | 3.19525509  | 14.37470695 |
| C | -4.10743010 | 0.72376172  | 14.37460576 |
| C | -4.10742982 | -0.72376696 | 14.37470695 |
| C | -2.68051109 | -3.19525795 | 14.37460576 |
| C | -1.42691433 | -3.91902205 | 14.37470695 |
| C | 1.42691901  | -3.91901967 | 14.37460576 |
| C | 2.68051549  | -3.19525509 | 14.37470695 |
| C | 3.92026722  | 1.42637372  | 13.12961589 |
| C | 3.19539777  | 2.68187731  | 13.12964474 |
| C | 0.72485773  | 4.10823786  | 13.12961589 |
| C | -0.72487499 | 4.10823430  | 13.12964474 |
| C | -3.19540948 | 2.68186414  | 13.12961589 |
| C | -3.92027276 | 1.42635699  | 13.12964474 |
| C | -3.92026722 | -1.42637372 | 13.12961589 |
| C | -3.19539777 | -2.68187731 | 13.12964474 |
| C | -0.72485773 | -4.10823786 | 13.12961589 |
| C | 0.72487499  | -4.10823430 | 13.12964474 |
| C | 3.19540948  | -2.68186414 | 13.12961589 |
| C | 3.92027276  | -1.42635699 | 13.12964474 |
| C | 2.67523041  | 3.19349430  | 11.87826704 |
| C | 1.42802183  | 3.91356894  | 11.87820371 |
| C | -1.42803198 | 3.91356464  | 11.87826704 |
| C | -2.67523921 | 3.19348766  | 11.87820371 |
| C | -4.10326239 | 0.72007034  | 11.87826704 |
| C | -4.10326104 | -0.72008129 | 11.87820371 |
| C | -2.67523041 | -3.19349430 | 11.87826704 |
| C | -1.42802183 | -3.91356894 | 11.87820371 |
| C | 1.42803198  | -3.91356464 | 11.87826704 |
| C | 2.67523921  | -3.19348766 | 11.87820371 |
| C | 4.10326239  | -0.72007034 | 11.87826704 |
| C | 4.10326104  | 0.72008129  | 11.87820371 |
| C | 0.72304392  | 4.10736737  | 10.62470680 |
| C | -0.72304809 | 4.10736644  | 10.62460181 |
| C | -3.19556253 | 2.67985808  | 10.62470680 |
| C | -3.91860772 | 1.42750521  | 10.62460181 |
| C | -3.91860644 | -1.42750928 | 10.62470680 |
| C | -3.19555963 | -2.67986123 | 10.62460181 |
| C | -0.72304392 | -4.10736737 | 10.62470680 |
| C | 0.72304809  | -4.10736644 | 10.62460181 |
| C | 3.19556253  | -2.67985808 | 10.62470680 |
| C | 3.91860772  | -1.42750521 | 10.62460181 |
| C | 3.91860644  | 1.42750928  | 10.62470680 |
| C | 3.19555963  | 2.67986123  | 10.62460181 |
| C | -1.42676189 | 3.92134589  | 9.37858269  |
| C | -2.68259670 | 3.19629012  | 9.37851162  |
| C | -4.10936610 | 0.72506090  | 9.37858269  |
| C | -4.10936679 | -0.72505183 | 9.37851162  |
| C | -2.68260421 | -3.19628498 | 9.37858269  |
| C | -1.42677009 | -3.92134195 | 9.37851162  |
| C | 1.42676189  | -3.92134589 | 9.37858269  |
| C | 2.68259670  | -3.19629012 | 9.37851162  |
| C | 4.10936610  | -0.72506090 | 9.37858269  |
| C | 4.10936679  | 0.72505183  | 9.37851162  |
| C | 2.68260421  | 3.19628498  | 9.37858269  |
| C | 1.42677009  | 3.92134195  | 9.37851162  |
| C | -3.19363251 | 2.67589205  | 8.12832259  |
| C | -3.91420482 | 1.42782645  | 8.12832289  |
| C | -3.91420675 | -1.42782086 | 8.12832259  |
| C | -3.19363638 | -2.67588758 | 8.12832289  |
| C | -0.72057423 | -4.10371291 | 8.12832259  |
| C | 0.72056843  | -4.10371403 | 8.12832289  |
| C | 3.19363251  | -2.67589205 | 8.12832259  |
| C | 3.91420482  | -1.42782645 | 8.12832289  |
| C | 3.91420675  | 1.42782086  | 8.12832259  |
| C | 3.19363638  | 2.67588758  | 8.12832289  |
| C | 0.72057423  | 4.10371291  | 8.12832259  |

|   |             |             |            |
|---|-------------|-------------|------------|
| C | -0.72056843 | 4.10371403  | 8.12832289 |
| C | -4.10604357 | 0.72239081  | 6.87409314 |
| C | -4.10604399 | -0.72239024 | 6.87413388 |
| C | -2.67863058 | -3.19474264 | 6.87409314 |
| C | -1.42741370 | -3.91713352 | 6.87413388 |
| C | 1.42741300  | -3.91713345 | 6.87409314 |
| C | 2.67863029  | -3.19474328 | 6.87413388 |
| C | 4.10604357  | -0.72239081 | 6.87409314 |
| C | 4.10604399  | 0.72239024  | 6.87413388 |
| C | 2.67863058  | 3.19474264  | 6.87409314 |
| C | 1.42741370  | 3.91713352  | 6.87413388 |
| C | -1.42741300 | 3.91713345  | 6.87409314 |
| C | -2.67863029 | 3.19474328  | 6.87413388 |
| C | -3.92163454 | -1.42682788 | 5.62694634 |
| C | -3.19648009 | -2.68282834 | 5.62696744 |
| C | -0.72514808 | -4.10964908 | 5.62694634 |
| C | 0.72515746  | -4.10964713 | 5.62696744 |
| C | 3.19648646  | -2.68282120 | 5.62694634 |
| C | 3.92163754  | -1.42681879 | 5.62696744 |
| C | 3.92163454  | 1.42682788  | 5.62694634 |
| C | 3.19648009  | 2.68282834  | 5.62696744 |
| C | 0.72514808  | 4.10964908  | 5.62694634 |
| C | -0.72515746 | 4.10964713  | 5.62696744 |
| C | -3.19648646 | 2.68282120  | 5.62694634 |
| C | -3.92163754 | 1.42681879  | 5.62696744 |
| C | -2.67699331 | -3.19449682 | 4.37751335 |
| C | -1.42801405 | -3.91559540 | 4.37748739 |
| C | 1.42801874  | -3.91559262 | 4.37751335 |
| C | 2.67699807  | -3.19449415 | 4.37748739 |
| C | 4.10501205  | -0.72109580 | 4.37751335 |
| C | 4.10501212  | 0.72110126  | 4.37748739 |
| C | 2.67699331  | 3.19449682  | 4.37751335 |
| C | 1.42801405  | 3.91559540  | 4.37748739 |
| C | -1.42801874 | 3.91559262  | 4.37751335 |
| C | -2.67699807 | 3.19449415  | 4.37748739 |
| C | -4.10501205 | 0.72109580  | 4.37751335 |
| C | -4.10501212 | -0.72110126 | 4.37748739 |
| C | -0.72197066 | -4.10586320 | 3.12338164 |
| C | 0.72197149  | -4.10586286 | 3.12333813 |
| C | 3.19479651  | -2.67817653 | 3.12338164 |
| C | 3.91676728  | -1.42768578 | 3.12333813 |
| C | 3.91676717  | 1.42768667  | 3.12338164 |
| C | 3.19479580  | 2.67817708  | 3.12333813 |
| C | 0.72197066  | 4.10586320  | 3.12338164 |
| C | -0.72197149 | 4.10586286  | 3.12333813 |
| C | -3.19479651 | 2.67817653  | 3.12338164 |
| C | -3.91676728 | 1.42768578  | 3.12333813 |
| C | -3.91676717 | -1.42768667 | 3.12338164 |
| C | -3.19479580 | -2.67817708 | 3.12333813 |
| C | 1.42677070  | -3.92162033 | 1.87556091 |
| C | 2.68283221  | -3.19643305 | 1.87554460 |
| C | 4.10960818  | -0.72519049 | 1.87556091 |
| C | 4.10960833  | 0.72518433  | 1.87554460 |
| C | 2.68283748  | 3.19642984  | 1.87556091 |
| C | 1.42677612  | 3.92161737  | 1.87554460 |
| C | -1.42677070 | 3.92162033  | 1.87556091 |
| C | -2.68283221 | 3.19643305  | 1.87554460 |
| C | -4.10960818 | 0.72519049  | 1.87556091 |
| C | -4.10960833 | -0.72518433 | 1.87554460 |
| C | -2.68283748 | -3.19642984 | 1.87556091 |
| C | -1.42677612 | -3.92161737 | 1.87554460 |
| C | 3.19465589  | -2.67762717 | 0.62697832 |
| C | 3.91622123  | -1.42784334 | 0.62699793 |
| C | 3.91622110  | 1.42783957  | 0.62697832 |
| C | 3.19465921  | 2.67762540  | 0.62699793 |
| C | 0.72156520  | 4.10546674  | 0.62697832 |
| C | -0.72156201 | 4.10546874  | 0.62699793 |
| C | -3.19465589 | 2.67762717  | 0.62697832 |
| C | -3.91622123 | 1.42784334  | 0.62699793 |
| C | -3.91622110 | -1.42783957 | 0.62697832 |

|   |             |             |             |
|---|-------------|-------------|-------------|
| C | -3.19465921 | -2.67762540 | 0.62699793  |
| C | -0.72156520 | -4.10546674 | 0.62697832  |
| C | 0.72156201  | -4.10546874 | 0.62699793  |
| C | 4.10546874  | -0.72156201 | -0.62699793 |
| C | 4.10546674  | 0.72156520  | -0.62697832 |
| C | 2.67762540  | 3.19465921  | -0.62699793 |
| C | 1.42783957  | 3.91622110  | -0.62697832 |
| C | -1.42784334 | 3.91622123  | -0.62699793 |
| C | -2.67762717 | 3.19465589  | -0.62697832 |
| C | -4.10546874 | 0.72156201  | -0.62699793 |
| C | -4.10546674 | -0.72156520 | -0.62697832 |
| C | -2.67762540 | -3.19465921 | -0.62699793 |
| C | -1.42783957 | -3.91622110 | -0.62697832 |
| C | 1.42784334  | -3.91622123 | -0.62699793 |
| C | 2.67762717  | -3.19465589 | -0.62697832 |
| C | 3.92161737  | 1.42677612  | -1.87554460 |
| C | 3.19642984  | 2.68283748  | -1.87556091 |
| C | 0.72518433  | 4.10960833  | -1.87554460 |
| C | -0.72519049 | 4.10960818  | -1.87556091 |
| C | -3.19643305 | 2.68283221  | -1.87554460 |
| C | -3.92162033 | 1.42677070  | -1.87556091 |
| C | -3.92161737 | -1.42677612 | -1.87554460 |
| C | -3.19642984 | -2.68283748 | -1.87556091 |
| C | -0.72518433 | -4.10960833 | -1.87554460 |
| C | 0.72519049  | -4.10960818 | -1.87556091 |
| C | 3.19643305  | -2.68283221 | -1.87554460 |
| C | 3.92162033  | -1.42677070 | -1.87556091 |
| C | 2.67817708  | 3.19479580  | -3.12333813 |
| C | 1.42768667  | 3.91676717  | -3.12338164 |
| C | -1.42768578 | 3.91676728  | -3.12333813 |
| C | -2.67817653 | 3.19479651  | -3.12338164 |
| C | -4.10586286 | 0.72197149  | -3.12333813 |
| C | -4.10586320 | -0.72197066 | -3.12338164 |
| C | -2.67817708 | -3.19479580 | -3.12333813 |
| C | -1.42768667 | -3.91676717 | -3.12338164 |
| C | 1.42768578  | -3.91676728 | -3.12333813 |
| C | 2.67817653  | -3.19479651 | -3.12338164 |
| C | 4.10586286  | -0.72197149 | -3.12333813 |
| C | 4.10586320  | 0.72197066  | -3.12338164 |
| C | 0.72110126  | 4.10501212  | -4.37748739 |
| C | -0.72109580 | 4.10501205  | -4.37751335 |
| C | -3.19449415 | 2.67699807  | -4.37748739 |
| C | -3.91559262 | 1.42801874  | -4.37751335 |
| C | -3.91559540 | -1.42801405 | -4.37748739 |
| C | -3.19449682 | -2.67699331 | -4.37751335 |
| C | -0.72110126 | -4.10501212 | -4.37748739 |
| C | 0.72109580  | -4.10501205 | -4.37751335 |
| C | 3.19449415  | -2.67699807 | -4.37748739 |
| C | 3.91559262  | -1.42801874 | -4.37751335 |
| C | 3.91559540  | 1.42801405  | -4.37748739 |
| C | 3.19449682  | 2.67699331  | -4.37751335 |
| C | -1.42681879 | 3.92163754  | -5.62696744 |
| C | -2.68282120 | 3.19648646  | -5.62694634 |
| C | -4.10964713 | 0.72515746  | -5.62696744 |
| C | -4.10964908 | -0.72514808 | -5.62694634 |
| C | -2.68282834 | -3.19648009 | -5.62696744 |
| C | -1.42682788 | -3.92163454 | -5.62694634 |
| C | 1.42681879  | -3.92163754 | -5.62696744 |
| C | 2.68282120  | -3.19648646 | -5.62694634 |
| C | 4.10964713  | -0.72515746 | -5.62696744 |
| C | 4.10964908  | 0.72514808  | -5.62694634 |
| C | 2.68282834  | 3.19648009  | -5.62696744 |
| C | 1.42682788  | 3.92163454  | -5.62694634 |
| C | -3.19474328 | 2.67863029  | -6.87413388 |
| C | -3.91713345 | 1.42741300  | -6.87409314 |
| C | -3.91713352 | -1.42741370 | -6.87413388 |
| C | -3.19474264 | -2.67863058 | -6.87409314 |
| C | -0.72239024 | -4.10604399 | -6.87413388 |
| C | 0.72239081  | -4.10604357 | -6.87409314 |
| C | 3.19474328  | -2.67863029 | -6.87413388 |

|   |             |             |              |
|---|-------------|-------------|--------------|
| C | 3.91713345  | -1.42741300 | -6.87409314  |
| C | 3.91713352  | 1.42741370  | -6.87413388  |
| C | 3.19474264  | 2.67863058  | -6.87409314  |
| C | 0.72239024  | 4.10604399  | -6.87413388  |
| C | -0.72239081 | 4.10604357  | -6.87409314  |
| C | -4.10371403 | 0.72056843  | -8.12832289  |
| C | -4.10371291 | -0.72057423 | -8.12832259  |
| C | -2.67588758 | -3.19363638 | -8.12832289  |
| C | -1.42782086 | -3.91420675 | -8.12832259  |
| C | 1.42782645  | -3.91420482 | -8.12832289  |
| C | 2.67589205  | -3.19363251 | -8.12832259  |
| C | 4.10371403  | -0.72056843 | -8.12832289  |
| C | 4.10371291  | 0.72057423  | -8.12832259  |
| C | 2.67588758  | 3.19363638  | -8.12832289  |
| C | 1.42782086  | 3.91420675  | -8.12832259  |
| C | -1.42782645 | 3.91420482  | -8.12832289  |
| C | -2.67589205 | 3.19363251  | -8.12832259  |
| C | -3.92134195 | -1.42677009 | -9.37851162  |
| C | -3.19628498 | -2.68260421 | -9.37858269  |
| C | -0.72505183 | -4.10936679 | -9.37851162  |
| C | 0.72506090  | -4.10936610 | -9.37858269  |
| C | 3.19629012  | -2.68259670 | -9.37851162  |
| C | 3.92134589  | -1.42676189 | -9.37858269  |
| C | 3.92134195  | 1.42677009  | -9.37851162  |
| C | 3.19628498  | 2.68260421  | -9.37858269  |
| C | 0.72505183  | 4.10936679  | -9.37851162  |
| C | -0.72506090 | 4.10936610  | -9.37858269  |
| C | -3.19629012 | 2.68259670  | -9.37851162  |
| C | -3.92134589 | 1.42676189  | -9.37858269  |
| C | -2.67986123 | -3.19555963 | -10.62460181 |
| C | -1.42750928 | -3.91860644 | -10.62470680 |
| C | 1.42750521  | -3.91860772 | -10.62460181 |
| C | 2.67985808  | -3.19556253 | -10.62470680 |
| C | 4.10736644  | -0.72304809 | -10.62460181 |
| C | 4.10736737  | 0.72304392  | -10.62470680 |
| C | 2.67986123  | 3.19555963  | -10.62460181 |
| C | 1.42750928  | 3.91860644  | -10.62470680 |
| C | -1.42750521 | 3.91860772  | -10.62460181 |
| C | -2.67985808 | 3.19556253  | -10.62470680 |
| C | -4.10736644 | 0.72304809  | -10.62460181 |
| C | -4.10736737 | -0.72304392 | -10.62470680 |
| C | -0.72008129 | -4.10326104 | -11.87820371 |
| C | 0.72007034  | -4.10326239 | -11.87826704 |
| C | 3.19348766  | -2.67523921 | -11.87820371 |
| C | 3.91356464  | -1.42803198 | -11.87826704 |
| C | 3.91356894  | 1.42802183  | -11.87820371 |
| C | 3.19349430  | 2.67523041  | -11.87826704 |
| C | 0.72008129  | 4.10326104  | -11.87820371 |
| C | -0.72007034 | 4.10326239  | -11.87826704 |
| C | -3.19348766 | 2.67523921  | -11.87820371 |
| C | -3.91356464 | 1.42803198  | -11.87826704 |
| C | -3.91356894 | -1.42802183 | -11.87820371 |
| C | -3.19349430 | -2.67523041 | -11.87826704 |
| C | 1.42635699  | -3.92027276 | -13.12964474 |
| C | 2.68186414  | -3.19540948 | -13.12961589 |
| C | 4.10823430  | -0.72487499 | -13.12964474 |
| C | 4.10823786  | 0.72485773  | -13.12961589 |
| C | 2.68187731  | 3.19539777  | -13.12964474 |
| C | 1.42637372  | 3.92026722  | -13.12961589 |
| C | -1.42635699 | 3.92027276  | -13.12964474 |
| C | -2.68186414 | 3.19540948  | -13.12961589 |
| C | -4.10823430 | 0.72487499  | -13.12964474 |
| C | -4.10823786 | -0.72485773 | -13.12961589 |
| C | -2.68187731 | -3.19539777 | -13.12964474 |
| C | -1.42637372 | -3.92026722 | -13.12961589 |
| C | 3.19525509  | -2.68051549 | -14.37470695 |
| C | 3.91901967  | -1.42691901 | -14.37460576 |
| C | 3.91902205  | 1.42691433  | -14.37470695 |
| C | 3.19525795  | 2.68051109  | -14.37460576 |
| C | 0.72376696  | 4.10742982  | -14.37470695 |

|   |             |             |              |
|---|-------------|-------------|--------------|
| C | -0.72376172 | 4.10743010  | -14.37460576 |
| C | -3.19525509 | 2.68051549  | -14.37470695 |
| C | -3.91901967 | 1.42691901  | -14.37460576 |
| C | -3.91902205 | -1.42691433 | -14.37470695 |
| C | -3.19525795 | -2.68051109 | -14.37460576 |
| C | -0.72376696 | -4.10742982 | -14.37470695 |
| C | 0.72376172  | -4.10743010 | -14.37460576 |
| C | 4.10287074  | -0.71917123 | -15.62810206 |
| C | 4.10286987  | 0.71917510  | -15.62800630 |
| C | 2.67425592  | 3.19360468  | -15.62810206 |
| C | 1.42861103  | 3.91277709  | -15.62800630 |
| C | -1.42861482 | 3.91277591  | -15.62810206 |
| C | -2.67425884 | 3.19360199  | -15.62800630 |
| C | -4.10287074 | 0.71917123  | -15.62810206 |
| C | -4.10286987 | -0.71917510 | -15.62800630 |
| C | -2.67425592 | -3.19360468 | -15.62810206 |
| C | -1.42861103 | -3.91277709 | -15.62800630 |
| C | 1.42861482  | -3.91277591 | -15.62810206 |
| C | 2.67425884  | -3.19360199 | -15.62800630 |
| C | 3.92059390  | 1.42671255  | -16.88131448 |
| C | 3.19586000  | 2.68198569  | -16.88129334 |
| C | 0.72472763  | 4.10869019  | -16.88131448 |
| C | -0.72473774 | 4.10868879  | -16.88129334 |
| C | -3.19586626 | 2.68197764  | -16.88131448 |
| C | -3.92059774 | 1.42670310  | -16.88129334 |
| C | -3.92059390 | -1.42671255 | -16.88131448 |
| C | -3.19586000 | -2.68198569 | -16.88129334 |
| C | -0.72472763 | -4.10869019 | -16.88131448 |
| C | 0.72473774  | -4.10868879 | -16.88129334 |
| C | 3.19586626  | -2.68197764 | -16.88131448 |
| C | 3.92059774  | -1.42670310 | -16.88129334 |
| C | 2.68002870  | 3.19277094  | -18.12424230 |
| C | 1.42499967  | 3.91735921  | -18.12430521 |
| C | -1.42500639 | 3.91735841  | -18.12424230 |
| C | -2.68003275 | 3.19276552  | -18.12430521 |
| C | -4.10503509 | 0.72458747  | -18.12424230 |
| C | -4.10503243 | -0.72459369 | -18.12430521 |
| C | -2.68002870 | -3.19277094 | -18.12424230 |
| C | -1.42499967 | -3.91735921 | -18.12430521 |
| C | 1.42500639  | -3.91735841 | -18.12424230 |
| C | 2.68003275  | -3.19276552 | -18.12430521 |
| C | 4.10503509  | -0.72458747 | -18.12424230 |
| C | 4.10503243  | 0.72459369  | -18.12430521 |
| C | 0.71554895  | 4.08819419  | -19.37702880 |
| C | -0.71554686 | 4.08819420  | -19.37712787 |
| C | -3.18270555 | 2.66378067  | -19.37702880 |
| C | -3.89825346 | 1.42441534  | -19.37712787 |
| C | -3.89825450 | -1.42441353 | -19.37702880 |
| C | -3.18270660 | -2.66377886 | -19.37712787 |
| C | -0.71554895 | -4.08819419 | -19.37702880 |
| C | 0.71554686  | -4.08819420 | -19.37712787 |
| C | 3.18270555  | -2.66378067 | -19.37702880 |
| C | 3.89825346  | -1.42441534 | -19.37712787 |
| C | 3.89825450  | 1.42441353  | -19.37702880 |
| C | 3.18270660  | 2.66377886  | -19.37712787 |
| C | -1.42070094 | 3.91261770  | -20.63872867 |
| C | -2.67807103 | 3.18667817  | -20.63880173 |
| C | -4.09877679 | 0.72594575  | -20.63872867 |
| C | -4.09877976 | -0.72593847 | -20.63880173 |
| C | -2.67807585 | -3.18667195 | -20.63872867 |
| C | -1.42070873 | -3.91261663 | -20.63880173 |
| C | 1.42070094  | -3.91261770 | -20.63872867 |
| C | 2.67807103  | -3.18667817 | -20.63880173 |
| C | 4.09877679  | -0.72594575 | -20.63872867 |
| C | 4.09877976  | 0.72593847  | -20.63880173 |
| C | 2.67807585  | 3.18667195  | -20.63872867 |
| C | 1.42070873  | 3.91261663  | -20.63880173 |
| C | -3.22551459 | 2.71168752  | -21.87876913 |
| C | -3.96114093 | 1.43754565  | -21.87877808 |
| C | -3.96114758 | -1.43753381 | -21.87876913 |



|   |             |             |              |
|---|-------------|-------------|--------------|
| C | -3.22552151 | -2.71167585 | -21.87877808 |
| C | -0.73563299 | -4.14922134 | -21.87876913 |
| C | 0.73561941  | -4.14922149 | -21.87877808 |
| C | 3.22551459  | -2.71168752 | -21.87876913 |
| C | 3.96114093  | -1.43754565 | -21.87877808 |
| C | 3.96114758  | 1.43753381  | -21.87876913 |
| C | 3.22552151  | 2.71167585  | -21.87877808 |
| C | 0.73563299  | 4.14922134  | -21.87876913 |
| C | -0.73561941 | 4.14922149  | -21.87877808 |
| C | -4.21345120 | 0.69235285  | -23.09335005 |
| C | -4.21344375 | -0.69235103 | -23.09331804 |
| C | -2.70632076 | -3.30277935 | -23.09335005 |
| C | -1.50712829 | -3.99512484 | -23.09331804 |
| C | 1.50713044  | -3.99513220 | -23.09335005 |
| C | 2.70631546  | -3.30277381 | -23.09331804 |
| C | 4.21345120  | -0.69235285 | -23.09335005 |
| C | 4.21344375  | 0.69235103  | -23.09331804 |
| C | 2.70632076  | 3.30277935  | -23.09335005 |
| C | 1.50712829  | 3.99512484  | -23.09331804 |
| C | -1.50713044 | 3.99513220  | -23.09335005 |
| C | -2.70631546 | 3.30277381  | -23.09331804 |
| H | -3.08931698 | 3.19966807  | 24.05032760  |
| H | -4.31564952 | 1.07559733  | 24.05031378  |
| H | -4.31565232 | -1.07559295 | 24.05032760  |
| H | -3.08931937 | -3.19966345 | 24.05031378  |
| H | -1.22633534 | -4.27526102 | 24.05032760  |
| H | 1.22633015  | -4.27526078 | 24.05031378  |
| H | 3.08931698  | -3.19966807 | 24.05032760  |
| H | 4.31564952  | -1.07559733 | 24.05031378  |
| H | 4.31565232  | 1.07559295  | 24.05032760  |
| H | 3.08931937  | 3.19966345  | 24.05031378  |
| H | 1.22633534  | 4.27526102  | 24.05032760  |
| H | -1.22633015 | 4.27526078  | 24.05031378  |
| H | -4.27526078 | 1.22633015  | -24.05031378 |
| H | -4.27526102 | -1.22633534 | -24.05032760 |
| H | -3.19966345 | -3.08931937 | -24.05031378 |
| H | -1.07559295 | -4.31565232 | -24.05032760 |
| H | 1.07559733  | -4.31564952 | -24.05031378 |
| H | 3.19966807  | -3.08931698 | -24.05032760 |
| H | 4.27526078  | -1.22633015 | -24.05031378 |
| H | 4.27526102  | 1.22633534  | -24.05032760 |
| H | 3.19966345  | 3.08931937  | -24.05031378 |
| H | 1.07559295  | 4.31565232  | -24.05032760 |
| H | -1.07559733 | 4.31564952  | -24.05031378 |
| H | -3.19966807 | 3.08931698  | -24.05032760 |

Nanotube (6,6) ul9v6s  
B3LYP/STO-3G Energy: -17633.201055

|   |              |              |               |
|---|--------------|--------------|---------------|
| H | -3.201319000 | -3.090484000 | 24.682064000  |
| H | 4.277097000  | -1.227181000 | 24.682064000  |
| H | -1.075778000 | 4.317665000  | 24.682064000  |
| H | 3.201319000  | 3.090484000  | 24.682064000  |
| H | -4.277097000 | 1.227181000  | 24.682064000  |
| H | 1.075778000  | -4.317665000 | 24.682064000  |
| H | -3.201319000 | 3.090484000  | -24.682064000 |
| H | 4.277097000  | 1.227181000  | -24.682064000 |
| H | -1.075778000 | -4.317665000 | -24.682064000 |
| H | 3.201319000  | -3.090484000 | -24.682064000 |
| H | -4.277097000 | -1.227181000 | -24.682064000 |
| H | 1.075778000  | 4.317665000  | -24.682064000 |
| H | 3.201319000  | 3.090484000  | -24.682064000 |
| H | -4.277097000 | 1.227181000  | -24.682064000 |
| H | 1.075778000  | -4.317665000 | -24.682064000 |
| H | -3.201319000 | -3.090484000 | -24.682064000 |
| H | 4.277097000  | -1.227181000 | -24.682064000 |
| H | -1.075778000 | 4.317665000  | -24.682064000 |
| H | 3.201319000  | -3.090484000 | 24.682064000  |

|   |              |              |               |
|---|--------------|--------------|---------------|
| H | -4.277097000 | -1.227181000 | 24.682064000  |
| H | 1.075778000  | 4.317665000  | 24.682064000  |
| H | -3.201319000 | 3.090484000  | 24.682064000  |
| H | 4.277097000  | 1.227181000  | 24.682064000  |
| H | -1.075778000 | -4.317665000 | 24.682064000  |
| C | -2.704423000 | -3.301366000 | 23.726418000  |
| C | 4.211278000  | -0.691416000 | 23.726418000  |
| C | -1.506855000 | 3.992782000  | 23.726418000  |
| C | 2.704423000  | 3.301366000  | 23.726418000  |
| C | -4.211278000 | 0.691416000  | 23.726418000  |
| C | 1.506855000  | -3.992782000 | 23.726418000  |
| C | -2.704423000 | 3.301366000  | -23.726418000 |
| C | 4.211278000  | 0.691416000  | -23.726418000 |
| C | -1.506855000 | -3.992782000 | -23.726418000 |
| C | 2.704423000  | -3.301366000 | -23.726418000 |
| C | -4.211278000 | -0.691416000 | -23.726418000 |
| C | 1.506855000  | 3.992782000  | -23.726418000 |
| C | 2.704423000  | 3.301366000  | -23.726418000 |
| C | -4.211278000 | 0.691416000  | -23.726418000 |
| C | 1.506855000  | -3.992782000 | -23.726418000 |
| C | -2.704423000 | -3.301366000 | -23.726418000 |
| C | 4.211278000  | -0.691416000 | -23.726418000 |
| C | -1.506855000 | 3.992782000  | -23.726418000 |
| C | 2.704423000  | -3.301366000 | 23.726418000  |
| C | -4.211278000 | -0.691416000 | 23.726418000  |
| C | 1.506855000  | 3.992782000  | 23.726418000  |
| C | -2.704423000 | 3.301366000  | 23.726418000  |
| C | 4.211278000  | 0.691416000  | 23.726418000  |
| C | -1.506855000 | -3.992782000 | 23.726418000  |
| C | -0.733897000 | -4.145632000 | 22.509738000  |
| C | 3.957171000  | 1.437243000  | 22.509738000  |
| C | -3.223274000 | 2.708389000  | 22.509738000  |
| C | 0.733897000  | 4.145632000  | 22.509738000  |
| C | -3.957171000 | -1.437243000 | 22.509738000  |
| C | 3.223274000  | -2.708389000 | 22.509738000  |
| C | -0.733897000 | 4.145632000  | -22.509738000 |
| C | 3.957171000  | -1.437243000 | -22.509738000 |
| C | -3.223274000 | -2.708389000 | -22.509738000 |
| C | 0.733897000  | -4.145632000 | -22.509738000 |
| C | -3.957171000 | 1.437243000  | -22.509738000 |
| C | 3.223274000  | 2.708389000  | -22.509738000 |
| C | 0.733897000  | 4.145632000  | -22.509738000 |
| C | -3.957171000 | -1.437243000 | -22.509738000 |
| C | 3.223274000  | -2.708389000 | -22.509738000 |
| C | -0.733897000 | -4.145632000 | -22.509738000 |
| C | 3.957171000  | 1.437243000  | -22.509738000 |
| C | -3.223274000 | 2.708389000  | -22.509738000 |
| C | 0.733897000  | -4.145632000 | 22.509738000  |
| C | -3.957171000 | 1.437243000  | 22.509738000  |
| C | 3.223274000  | 2.708389000  | 22.509738000  |
| C | -0.733897000 | 4.145632000  | 22.509738000  |
| C | 3.957171000  | -1.437243000 | 22.509738000  |
| C | -3.223274000 | -2.708389000 | 22.509738000  |
| C | 1.420045000  | -3.912145000 | 21.269334000  |
| C | 2.677994000  | 3.185867000  | 21.269334000  |
| C | -4.098039000 | 0.726277000  | 21.269334000  |
| C | -1.420045000 | 3.912145000  | 21.269334000  |
| C | -2.677994000 | -3.185867000 | 21.269334000  |
| C | 4.098039000  | -0.726277000 | 21.269334000  |
| C | 1.420045000  | 3.912145000  | -21.269334000 |
| C | 2.677994000  | -3.185867000 | -21.269334000 |
| C | -4.098039000 | -0.726277000 | -21.269334000 |
| C | -1.420045000 | -3.912145000 | -21.269334000 |
| C | -2.677994000 | 3.185867000  | -21.269334000 |
| C | 4.098039000  | 0.726277000  | -21.269334000 |
| C | -1.420045000 | 3.912145000  | -21.269334000 |
| C | -2.677994000 | -3.185867000 | -21.269334000 |
| C | 4.098039000  | -0.726277000 | -21.269334000 |
| C | 1.420045000  | -3.912145000 | -21.269334000 |
| C | 2.677994000  | 3.185867000  | -21.269334000 |

|   |              |              |               |
|---|--------------|--------------|---------------|
| C | -4.098039000 | 0.726277000  | -21.269334000 |
| C | -1.420045000 | -3.912145000 | 21.269334000  |
| C | -2.677994000 | 3.185867000  | 21.269334000  |
| C | 4.098039000  | 0.726277000  | 21.269334000  |
| C | 1.420045000  | 3.912145000  | 21.269334000  |
| C | 2.677994000  | -3.185867000 | 21.269334000  |
| C | -4.098039000 | -0.726277000 | 21.269334000  |
| C | 3.181718000  | -2.662546000 | 20.008845000  |
| C | 0.714974000  | 4.086721000  | 20.008845000  |
| C | -3.896691000 | -1.424175000 | 20.008845000  |
| C | -3.181718000 | 2.662546000  | 20.008845000  |
| C | -0.714974000 | -4.086721000 | 20.008845000  |
| C | 3.896691000  | 1.424175000  | 20.008845000  |
| C | 3.181718000  | 2.662546000  | -20.008845000 |
| C | 0.714974000  | -4.086721000 | -20.008845000 |
| C | -3.896691000 | 1.424175000  | -20.008845000 |
| C | -3.181718000 | -2.662546000 | -20.008845000 |
| C | -0.714974000 | 4.086721000  | -20.008845000 |
| C | 3.896691000  | -1.424175000 | -20.008845000 |
| C | -3.181718000 | 2.662546000  | -20.008845000 |
| C | -0.714974000 | -4.086721000 | -20.008845000 |
| C | 3.896691000  | 1.424175000  | -20.008845000 |
| C | 3.181718000  | -2.662546000 | -20.008845000 |
| C | 0.714974000  | 4.086721000  | -20.008845000 |
| C | -3.896691000 | -1.424175000 | -20.008845000 |
| C | -3.181718000 | -2.662546000 | 20.008845000  |
| C | -0.714974000 | 4.086721000  | 20.008845000  |
| C | 3.896691000  | -1.424175000 | 20.008845000  |
| C | 3.181718000  | 2.662546000  | 20.008845000  |
| C | 0.714974000  | -4.086721000 | 20.008845000  |
| C | -3.896691000 | 1.424175000  | 20.008845000  |
| C | 4.101558000  | -0.722826000 | 18.754052000  |
| C | -1.424793000 | 3.913467000  | 18.754052000  |
| C | -2.676765000 | -3.190640000 | 18.754052000  |
| C | -4.101558000 | 0.722826000  | 18.754052000  |
| C | 1.424793000  | -3.913467000 | 18.754052000  |
| C | 2.676765000  | 3.190640000  | 18.754052000  |
| C | 4.101558000  | 0.722826000  | -18.754052000 |
| C | -1.424793000 | -3.913467000 | -18.754052000 |
| C | -2.676765000 | 3.190640000  | -18.754052000 |
| C | -4.101558000 | -0.722826000 | -18.754052000 |
| C | 1.424793000  | 3.913467000  | -18.754052000 |
| C | 2.676765000  | -3.190640000 | -18.754052000 |
| C | -4.101558000 | 0.722826000  | -18.754052000 |
| C | 1.424793000  | -3.913467000 | -18.754052000 |
| C | 2.676765000  | 3.190640000  | -18.754052000 |
| C | 4.101558000  | -0.722826000 | -18.754052000 |
| C | -1.424793000 | 3.913467000  | -18.754052000 |
| C | -2.676765000 | -3.190640000 | -18.754052000 |
| C | -4.101558000 | -0.722826000 | 18.754052000  |
| C | 1.424793000  | 3.913467000  | 18.754052000  |
| C | 2.676765000  | -3.190640000 | 18.754052000  |
| C | 4.101558000  | 0.722826000  | 18.754052000  |
| C | -1.424793000 | -3.913467000 | 18.754052000  |
| C | -2.676765000 | 3.190640000  | 18.754052000  |
| C | 3.920408000  | 1.426156000  | 17.510064000  |
| C | -3.195291000 | 2.682095000  | 17.510064000  |
| C | -0.725116000 | -4.108251000 | 17.510064000  |
| C | -3.920408000 | -1.426156000 | 17.510064000  |
| C | 3.195291000  | -2.682095000 | 17.510064000  |
| C | 0.725116000  | 4.108251000  | 17.510064000  |
| C | 3.920408000  | -1.426156000 | -17.510064000 |
| C | -3.195291000 | -2.682095000 | -17.510064000 |
| C | -0.725116000 | 4.108251000  | -17.510064000 |
| C | -3.920408000 | 1.426156000  | -17.510064000 |
| C | 3.195291000  | 2.682095000  | -17.510064000 |
| C | 0.725116000  | -4.108251000 | -17.510064000 |
| C | -3.920408000 | -1.426156000 | -17.510064000 |
| C | 3.195291000  | -2.682095000 | -17.510064000 |
| C | 0.725116000  | 4.108251000  | -17.510064000 |

|   |              |              |               |
|---|--------------|--------------|---------------|
| C | 3.920408000  | 1.426156000  | -17.510064000 |
| C | -3.195291000 | 2.682095000  | -17.510064000 |
| C | -0.725116000 | -4.108251000 | -17.510064000 |
| C | -3.920408000 | 1.426156000  | 17.510064000  |
| C | 3.195291000  | 2.682095000  | 17.510064000  |
| C | 0.725116000  | -4.108251000 | 17.510064000  |
| C | 3.920408000  | -1.426156000 | 17.510064000  |
| C | -3.195291000 | -2.682095000 | 17.510064000  |
| C | -0.725116000 | 4.108251000  | 17.510064000  |
| C | 2.674159000  | 3.193450000  | 16.258430000  |
| C | -4.102688000 | 0.719164000  | 16.258430000  |
| C | 1.428530000  | -3.912614000 | 16.258430000  |
| C | -2.674159000 | -3.193450000 | 16.258430000  |
| C | 4.102688000  | -0.719164000 | 16.258430000  |
| C | -1.428530000 | 3.912614000  | 16.258430000  |
| C | 2.674159000  | -3.193450000 | -16.258430000 |
| C | -4.102688000 | -0.719164000 | -16.258430000 |
| C | 1.428530000  | 3.912614000  | -16.258430000 |
| C | -2.674159000 | 3.193450000  | -16.258430000 |
| C | 4.102688000  | 0.719164000  | -16.258430000 |
| C | -1.428530000 | -3.912614000 | -16.258430000 |
| C | -2.674159000 | -3.193450000 | -16.258430000 |
| C | 4.102688000  | -0.719164000 | -16.258430000 |
| C | -1.428530000 | 3.912614000  | -16.258430000 |
| C | 2.674159000  | 3.193450000  | -16.258430000 |
| C | -4.102688000 | 0.719164000  | -16.258430000 |
| C | 1.428530000  | -3.912614000 | -16.258430000 |
| C | -2.674159000 | 3.193450000  | 16.258430000  |
| C | 4.102688000  | 0.719164000  | 16.258430000  |
| C | -1.428530000 | -3.912614000 | 16.258430000  |
| C | 2.674159000  | -3.193450000 | 16.258430000  |
| C | -4.102688000 | -0.719164000 | 16.258430000  |
| C | 1.428530000  | 3.912614000  | 16.258430000  |
| C | 0.721958000  | 4.105509000  | 15.003364000  |
| C | -3.916454000 | -1.427520000 | 15.003364000  |
| C | 3.194496000  | -2.677989000 | 15.003364000  |
| C | -0.721958000 | -4.105509000 | 15.003364000  |
| C | 3.916454000  | 1.427520000  | 15.003364000  |
| C | -3.194496000 | 2.677989000  | 15.003364000  |
| C | 0.721958000  | -4.105509000 | -15.003364000 |
| C | -3.916454000 | 1.427520000  | -15.003364000 |
| C | 3.194496000  | 2.677989000  | -15.003364000 |
| C | -0.721958000 | 4.105509000  | -15.003364000 |
| C | 3.916454000  | -1.427520000 | -15.003364000 |
| C | -3.194496000 | -2.677989000 | -15.003364000 |
| C | -0.721958000 | -4.105509000 | -15.003364000 |
| C | 3.916454000  | 1.427520000  | -15.003364000 |
| C | -3.194496000 | 2.677989000  | -15.003364000 |
| C | 0.721958000  | 4.105509000  | -15.003364000 |
| C | -3.916454000 | -1.427520000 | -15.003364000 |
| C | 3.194496000  | -2.677989000 | -15.003364000 |
| C | -0.721958000 | 4.105509000  | 15.003364000  |
| C | 3.916454000  | -1.427520000 | 15.003364000  |
| C | -3.194496000 | -2.677989000 | 15.003364000  |
| C | 0.721958000  | -4.105509000 | 15.003364000  |
| C | -3.916454000 | 1.427520000  | 15.003364000  |
| C | 3.194496000  | 2.677989000  | 15.003364000  |
| C | -1.426562000 | 3.921256000  | 13.756777000  |
| C | -2.682627000 | -3.196067000 | 13.756777000  |
| C | 4.109188000  | -0.725190000 | 13.756777000  |
| C | 1.426562000  | -3.921256000 | 13.756777000  |
| C | 2.682627000  | 3.196067000  | 13.756777000  |
| C | -4.109188000 | 0.725190000  | 13.756777000  |
| C | -1.426562000 | -3.921256000 | -13.756777000 |
| C | -2.682627000 | 3.196067000  | -13.756777000 |
| C | 4.109188000  | 0.725190000  | -13.756777000 |
| C | 1.426562000  | 3.921256000  | -13.756777000 |
| C | 2.682627000  | -3.196067000 | -13.756777000 |
| C | -4.109188000 | -0.725190000 | -13.756777000 |
| C | 1.426562000  | -3.921256000 | -13.756777000 |

|   |              |              |               |
|---|--------------|--------------|---------------|
| C | 2.682627000  | 3.196067000  | -13.756777000 |
| C | -4.109188000 | 0.725190000  | -13.756777000 |
| C | -1.426562000 | 3.921256000  | -13.756777000 |
| C | -2.682627000 | -3.196067000 | -13.756777000 |
| C | 4.109188000  | -0.725190000 | -13.756777000 |
| C | 1.426562000  | 3.921256000  | 13.756777000  |
| C | 2.682627000  | -3.196067000 | 13.756777000  |
| C | -4.109188000 | -0.725190000 | 13.756777000  |
| C | -1.426562000 | -3.921256000 | 13.756777000  |
| C | -2.682627000 | 3.196067000  | 13.756777000  |
| C | 4.109188000  | 0.725190000  | 13.756777000  |
| C | -3.193594000 | 2.675765000  | 12.507483000  |
| C | -0.720484000 | -4.103616000 | 12.507483000  |
| C | 3.914078000  | 1.427851000  | 12.507483000  |
| C | 3.193594000  | -2.675765000 | 12.507483000  |
| C | 0.720484000  | 4.103616000  | 12.507483000  |
| C | -3.914078000 | -1.427851000 | 12.507483000  |
| C | -3.193594000 | -2.675765000 | -12.507483000 |
| C | -0.720484000 | 4.103616000  | -12.507483000 |
| C | 3.914078000  | -1.427851000 | -12.507483000 |
| C | 3.193594000  | 2.675765000  | -12.507483000 |
| C | 0.720484000  | -4.103616000 | -12.507483000 |
| C | -3.914078000 | 1.427851000  | -12.507483000 |
| C | 3.193594000  | -2.675765000 | -12.507483000 |
| C | 0.720484000  | 4.103616000  | -12.507483000 |
| C | -3.914078000 | -1.427851000 | -12.507483000 |
| C | -3.193594000 | 2.675765000  | -12.507483000 |
| C | -0.720484000 | -4.103616000 | -12.507483000 |
| C | 3.914078000  | 1.427851000  | -12.507483000 |
| C | 3.193594000  | 2.675765000  | 12.507483000  |
| C | 0.720484000  | -4.103616000 | 12.507483000  |
| C | -3.914078000 | 1.427851000  | 12.507483000  |
| C | -3.193594000 | -2.675765000 | 12.507483000  |
| C | -0.720484000 | 4.103616000  | 12.507483000  |
| C | 3.914078000  | -1.427851000 | 12.507483000  |
| C | -4.103857000 | 0.720938000  | 11.252454000  |
| C | 1.427578000  | -3.914513000 | 11.252454000  |
| C | 2.676279000  | 3.193575000  | 11.252454000  |
| C | 4.103857000  | -0.720938000 | 11.252454000  |
| C | -1.427578000 | 3.914513000  | 11.252454000  |
| C | -2.676279000 | -3.193575000 | 11.252454000  |
| C | -4.103857000 | -0.720938000 | -11.252454000 |
| C | 1.427578000  | 3.914513000  | -11.252454000 |
| C | 2.676279000  | -3.193575000 | -11.252454000 |
| C | 4.103857000  | 0.720938000  | -11.252454000 |
| C | -1.427578000 | -3.914513000 | -11.252454000 |
| C | -2.676279000 | 3.193575000  | -11.252454000 |
| C | 4.103857000  | -0.720938000 | -11.252454000 |
| C | -1.427578000 | 3.914513000  | -11.252454000 |
| C | -2.676279000 | -3.193575000 | -11.252454000 |
| C | -4.103857000 | 0.720938000  | -11.252454000 |
| C | 1.427578000  | -3.914513000 | -11.252454000 |
| C | 2.676279000  | 3.193575000  | -11.252454000 |
| C | 4.103857000  | 0.720938000  | 11.252454000  |
| C | -1.427578000 | -3.914513000 | 11.252454000  |
| C | -2.676279000 | 3.193575000  | 11.252454000  |
| C | -4.103857000 | -0.720938000 | 11.252454000  |
| C | 1.427578000  | 3.914513000  | 11.252454000  |
| C | 2.676279000  | -3.193575000 | 11.252454000  |
| C | -3.920627000 | -1.426560000 | 10.004022000  |
| C | 3.195751000  | -2.682083000 | 10.004022000  |
| C | 0.724876000  | 4.108643000  | 10.004022000  |
| C | 3.920627000  | 1.426560000  | 10.004022000  |
| C | -3.195751000 | 2.682083000  | 10.004022000  |
| C | -0.724876000 | -4.108643000 | 10.004022000  |
| C | -3.920627000 | 1.426560000  | -10.004022000 |
| C | 3.195751000  | 2.682083000  | -10.004022000 |
| C | 0.724876000  | -4.108643000 | -10.004022000 |
| C | 3.920627000  | -1.426560000 | -10.004022000 |
| C | -3.195751000 | -2.682083000 | -10.004022000 |

|   |              |              |               |
|---|--------------|--------------|---------------|
| C | -0.724876000 | 4.108643000  | -10.004022000 |
| C | 3.920627000  | 1.426560000  | -10.004022000 |
| C | -3.195751000 | 2.682083000  | -10.004022000 |
| C | -0.724876000 | -4.108643000 | -10.004022000 |
| C | -3.920627000 | -1.426560000 | -10.004022000 |
| C | 3.195751000  | -2.682083000 | -10.004022000 |
| C | 0.724876000  | 4.108643000  | -10.004022000 |
| C | 3.920627000  | -1.426560000 | 10.004022000  |
| C | -3.195751000 | -2.682083000 | 10.004022000  |
| C | -0.724876000 | 4.108643000  | 10.004022000  |
| C | -3.920627000 | 1.426560000  | 10.004022000  |
| C | 3.195751000  | 2.682083000  | 10.004022000  |
| C | 0.724876000  | -4.108643000 | 10.004022000  |
| C | -2.677258000 | -3.194129000 | 8.756095000   |
| C | 4.104826000  | -0.721509000 | 8.756095000   |
| C | -1.427568000 | 3.915639000  | 8.756095000   |
| C | 2.677258000  | 3.194129000  | 8.756095000   |
| C | -4.104826000 | 0.721509000  | 8.756095000   |
| C | 1.427568000  | -3.915639000 | 8.756095000   |
| C | -2.677258000 | 3.194129000  | -8.756095000  |
| C | 4.104826000  | 0.721509000  | -8.756095000  |
| C | -1.427568000 | -3.915639000 | -8.756095000  |
| C | 2.677258000  | -3.194129000 | -8.756095000  |
| C | -4.104826000 | -0.721509000 | -8.756095000  |
| C | 1.427568000  | 3.915639000  | -8.756095000  |
| C | 2.677258000  | 3.194129000  | -8.756095000  |
| C | -4.104826000 | 0.721509000  | -8.756095000  |
| C | 1.427568000  | -3.915639000 | -8.756095000  |
| C | -2.677258000 | -3.194129000 | -8.756095000  |
| C | 4.104826000  | -0.721509000 | -8.756095000  |
| C | -1.427568000 | 3.915639000  | -8.756095000  |
| C | 2.677258000  | -3.194129000 | 8.756095000   |
| C | -4.104826000 | -0.721509000 | 8.756095000   |
| C | 1.427568000  | 3.915639000  | 8.756095000   |
| C | -2.677258000 | 3.194129000  | 8.756095000   |
| C | 4.104826000  | 0.721509000  | 8.756095000   |
| C | -1.427568000 | -3.915639000 | 8.756095000   |
| C | -0.720355000 | -4.103244000 | 7.501597000   |
| C | 3.913691000  | 1.427776000  | 7.501597000   |
| C | -3.193336000 | 2.675468000  | 7.501597000   |
| C | 0.720355000  | 4.103244000  | 7.501597000   |
| C | -3.913691000 | -1.427776000 | 7.501597000   |
| C | 3.193336000  | -2.675468000 | 7.501597000   |
| C | -0.720355000 | 4.103244000  | -7.501597000  |
| C | 3.913691000  | -1.427776000 | -7.501597000  |
| C | -3.193336000 | -2.675468000 | -7.501597000  |
| C | 0.720355000  | -4.103244000 | -7.501597000  |
| C | -3.913691000 | 1.427776000  | -7.501597000  |
| C | 3.193336000  | 2.675468000  | -7.501597000  |
| C | 0.720355000  | 4.103244000  | -7.501597000  |
| C | -3.913691000 | -1.427776000 | -7.501597000  |
| C | 3.193336000  | -2.675468000 | -7.501597000  |
| C | -0.720355000 | -4.103244000 | -7.501597000  |
| C | 3.913691000  | 1.427776000  | -7.501597000  |
| C | -3.193336000 | 2.675468000  | -7.501597000  |
| C | 0.720355000  | -4.103244000 | 7.501597000   |
| C | -3.913691000 | 1.427776000  | 7.501597000   |
| C | 3.193336000  | 2.675468000  | 7.501597000   |
| C | -0.720355000 | 4.103244000  | 7.501597000   |
| C | 3.913691000  | -1.427776000 | 7.501597000   |
| C | -3.193336000 | -2.675468000 | 7.501597000   |
| C | 1.426685000  | -3.919998000 | 6.251594000   |
| C | 2.681475000  | 3.195544000  | 6.251594000   |
| C | -4.108160000 | 0.724453000  | 6.251594000   |
| C | -1.426685000 | 3.919998000  | 6.251594000   |
| C | -2.681475000 | -3.195544000 | 6.251594000   |
| C | 4.108160000  | -0.724453000 | 6.251594000   |
| C | 1.426685000  | 3.919998000  | -6.251594000  |
| C | 2.681475000  | -3.195544000 | -6.251594000  |
| C | -4.108160000 | -0.724453000 | -6.251594000  |

|   |              |              |              |
|---|--------------|--------------|--------------|
| C | -1.426685000 | -3.919998000 | -6.251594000 |
| C | -2.681475000 | 3.195544000  | -6.251594000 |
| C | 4.108160000  | 0.724453000  | -6.251594000 |
| C | -1.426685000 | 3.919998000  | -6.251594000 |
| C | -2.681475000 | -3.195544000 | -6.251594000 |
| C | 4.108160000  | -0.724453000 | -6.251594000 |
| C | 1.426685000  | -3.919998000 | -6.251594000 |
| C | 2.681475000  | 3.195544000  | -6.251594000 |
| C | -4.108160000 | 0.724453000  | -6.251594000 |
| C | -1.426685000 | -3.919998000 | 6.251594000  |
| C | -2.681475000 | 3.195544000  | 6.251594000  |
| C | 4.108160000  | 0.724453000  | 6.251594000  |
| C | 1.426685000  | 3.919998000  | 6.251594000  |
| C | 2.681475000  | -3.195544000 | 6.251594000  |
| C | -4.108160000 | -0.724453000 | 6.251594000  |
| C | 3.194609000  | -2.678581000 | 5.004477000  |
| C | 0.722415000  | 4.105903000  | 5.004477000  |
| C | -3.917024000 | -1.427322000 | 5.004477000  |
| C | -3.194609000 | 2.678581000  | 5.004477000  |
| C | -0.722415000 | -4.105903000 | 5.004477000  |
| C | 3.917024000  | 1.427322000  | 5.004477000  |
| C | 3.194609000  | 2.678581000  | -5.004477000 |
| C | 0.722415000  | -4.105903000 | -5.004477000 |
| C | -3.917024000 | 1.427322000  | -5.004477000 |
| C | -3.194609000 | -2.678581000 | -5.004477000 |
| C | -0.722415000 | 4.105903000  | -5.004477000 |
| C | 3.917024000  | -1.427322000 | -5.004477000 |
| C | -3.194609000 | 2.678581000  | -5.004477000 |
| C | -0.722415000 | -4.105903000 | -5.004477000 |
| C | 3.917024000  | 1.427322000  | -5.004477000 |
| C | 3.194609000  | -2.678581000 | -5.004477000 |
| C | 0.722415000  | 4.105903000  | -5.004477000 |
| C | -3.917024000 | -1.427322000 | -5.004477000 |
| C | -3.194609000 | -2.678581000 | 5.004477000  |
| C | -0.722415000 | 4.105903000  | 5.004477000  |
| C | 3.917024000  | -1.427322000 | 5.004477000  |
| C | 3.194609000  | 2.678581000  | 5.004477000  |
| C | 0.722415000  | -4.105903000 | 5.004477000  |
| C | -3.917024000 | 1.427322000  | 5.004477000  |
| C | 4.102861000  | -0.720021000 | 3.750795000  |
| C | -1.427875000 | 3.913193000  | 3.750795000  |
| C | -2.674987000 | -3.193172000 | 3.750795000  |
| C | -4.102861000 | 0.720021000  | 3.750795000  |
| C | 1.427875000  | -3.913193000 | 3.750795000  |
| C | 2.674987000  | 3.193172000  | 3.750795000  |
| C | 4.102861000  | 0.720021000  | -3.750795000 |
| C | -1.427875000 | -3.913193000 | -3.750795000 |
| C | -2.674987000 | 3.193172000  | -3.750795000 |
| C | -4.102861000 | -0.720021000 | -3.750795000 |
| C | 1.427875000  | 3.913193000  | -3.750795000 |
| C | 2.674987000  | -3.193172000 | -3.750795000 |
| C | -4.102861000 | 0.720021000  | -3.750795000 |
| C | 1.427875000  | -3.913193000 | -3.750795000 |
| C | 2.674987000  | 3.193172000  | -3.750795000 |
| C | 4.102861000  | -0.720021000 | -3.750795000 |
| C | -1.427875000 | 3.913193000  | -3.750795000 |
| C | -2.674987000 | -3.193172000 | -3.750795000 |
| C | -4.102861000 | -0.720021000 | 3.750795000  |
| C | 1.427875000  | 3.913193000  | 3.750795000  |
| C | 2.674987000  | -3.193172000 | 3.750795000  |
| C | 4.102861000  | 0.720021000  | 3.750795000  |
| C | -1.427875000 | -3.913193000 | 3.750795000  |
| C | -2.674987000 | 3.193172000  | 3.750795000  |
| C | 3.919096000  | 1.426829000  | 2.499373000  |
| C | -3.195218000 | 2.680622000  | 2.499373000  |
| C | -0.723878000 | -4.107451000 | 2.499373000  |
| C | -3.919096000 | -1.426829000 | 2.499373000  |
| C | 3.195218000  | -2.680622000 | 2.499373000  |
| C | 0.723878000  | 4.107451000  | 2.499373000  |
| C | 3.919096000  | -1.426829000 | -2.499373000 |

|   |              |              |              |
|---|--------------|--------------|--------------|
| C | -3.195218000 | -2.680622000 | -2.499373000 |
| C | -0.723878000 | 4.107451000  | -2.499373000 |
| C | -3.919096000 | 1.426829000  | -2.499373000 |
| C | 3.195218000  | 2.680622000  | -2.499373000 |
| C | 0.723878000  | -4.107451000 | -2.499373000 |
| C | -3.919096000 | -1.426829000 | -2.499373000 |
| C | 3.195218000  | -2.680622000 | -2.499373000 |
| C | 0.723878000  | 4.107451000  | -2.499373000 |
| C | 3.919096000  | 1.426829000  | -2.499373000 |
| C | -3.195218000 | 2.680622000  | -2.499373000 |
| C | -0.723878000 | -4.107451000 | -2.499373000 |
| C | -3.919096000 | 1.426829000  | 2.499373000  |
| C | 3.195218000  | 2.680622000  | 2.499373000  |
| C | 0.723878000  | -4.107451000 | 2.499373000  |
| C | 3.919096000  | -1.426829000 | 2.499373000  |
| C | -3.195218000 | -2.680622000 | 2.499373000  |
| C | -0.723878000 | 4.107451000  | 2.499373000  |
| C | 2.679736000  | 3.195005000  | 1.252647000  |
| C | -4.106823000 | 0.723217000  | 1.252647000  |
| C | 1.427087000  | -3.918222000 | 1.252647000  |
| C | -2.679736000 | -3.195005000 | 1.252647000  |
| C | 4.106823000  | -0.723217000 | 1.252647000  |
| C | -1.427087000 | 3.918222000  | 1.252647000  |
| C | 2.679736000  | -3.195005000 | -1.252647000 |
| C | -4.106823000 | -0.723217000 | -1.252647000 |
| C | 1.427087000  | 3.918222000  | -1.252647000 |
| C | -2.679736000 | 3.195005000  | -1.252647000 |
| C | 4.106823000  | 0.723217000  | -1.252647000 |
| C | -1.427087000 | -3.918222000 | -1.252647000 |
| C | -2.679736000 | -3.195005000 | -1.252647000 |
| C | 4.106823000  | -0.723217000 | -1.252647000 |
| C | -1.427087000 | 3.918222000  | -1.252647000 |
| C | 2.679736000  | 3.195005000  | -1.252647000 |
| C | -4.106823000 | 0.723217000  | -1.252647000 |
| C | 1.427087000  | -3.918222000 | -1.252647000 |
| C | -2.679736000 | 3.195005000  | 1.252647000  |
| C | 4.106823000  | 0.723217000  | 1.252647000  |
| C | -1.427087000 | -3.918222000 | 1.252647000  |
| C | 2.679736000  | -3.195005000 | 1.252647000  |
| C | -4.106823000 | -0.723217000 | 1.252647000  |
| C | 1.427087000  | 3.918222000  | 1.252647000  |
| C | 0.719919000  | 4.102740000  | 0.000000000  |
| C | -3.913036000 | -1.427902000 | 0.000000000  |
| C | 3.193118000  | -2.674838000 | 0.000000000  |
| C | -0.719919000 | -4.102740000 | 0.000000000  |
| C | 3.913036000  | 1.427902000  | 0.000000000  |
| C | -3.193118000 | 2.674838000  | 0.000000000  |
| C | 0.719919000  | -4.102740000 | 0.000000000  |
| C | -3.913036000 | 1.427902000  | 0.000000000  |
| C | 3.193118000  | 2.674838000  | 0.000000000  |
| C | -0.719919000 | 4.102740000  | 0.000000000  |
| C | 3.913036000  | -1.427902000 | 0.000000000  |
| C | -3.193118000 | -2.674838000 | 0.000000000  |

Nanotube (6,6) u20v0\_  
B3LYP/STO-3G Energy: -18084.975277

|   |             |              |             |
|---|-------------|--------------|-------------|
| H | 0.77288539  | -25.28911539 | -4.37806970 |
| C | 1.22560208  | -24.33114937 | -4.09156624 |
| H | 4.17809944  | -25.28910213 | -1.51972048 |
| C | 4.15624499  | -24.33114174 | -0.98437487 |
| H | 3.40496778  | -25.28911017 | 2.85829044  |
| C | 2.93052698  | -24.33111910 | 3.10708258  |
| H | -0.77289149 | -25.28910387 | 4.37806654  |
| C | -1.22556593 | -24.33118098 | 4.09158544  |
| H | -4.17809947 | -25.28906681 | 1.51969531  |
| C | -4.15623745 | -24.33119435 | 0.98450441  |
| H | -3.40496708 | -25.28910928 | -2.85829436 |



|   |             |              |             |
|---|-------------|--------------|-------------|
| C | -2.93055801 | -24.33111966 | -3.10706324 |
| C | 2.47185376  | -24.33110807 | -3.48431286 |
| C | 3.03015163  | -23.11838537 | -2.93144093 |
| C | 4.25335185  | -24.33098328 | 0.39845203  |
| C | 4.05366544  | -23.11838595 | 1.15832064  |
| C | 1.78153210  | -24.33106259 | 3.88274045  |
| C | 1.02359683  | -23.11839791 | 4.08988134  |
| C | -2.47188555 | -24.33110731 | 3.48429528  |
| C | -3.03015017 | -23.11840507 | 2.93144299  |
| C | -4.25336305 | -24.33103596 | -0.39858242 |
| C | -4.05366854 | -23.11836210 | -1.15830820 |
| C | -1.78150003 | -24.33109537 | -3.88276282 |
| C | -1.02360032 | -23.11836131 | -4.08987793 |
| C | 3.85350764  | -23.11838863 | -1.70927996 |
| C | 4.03746814  | -21.87847062 | -1.00838892 |
| C | 3.40685723  | -23.11838077 | 2.48259821  |
| C | 2.89194003  | -21.87846328 | 2.99229202  |
| C | -0.44655896 | -23.11837190 | 4.19175007  |
| C | -1.14543723 | -21.87847220 | 4.00066728  |
| C | -3.85351059 | -23.11836390 | 1.70926895  |
| C | -4.03746541 | -21.87848560 | 1.00841936  |
| C | -3.40685869 | -23.11840045 | -2.48260111 |
| C | -2.89194588 | -21.87844800 | -2.99229177 |
| C | 0.44655506  | -23.11840718 | -4.19175064 |
| C | 1.14545057  | -21.87844420 | -4.00066017 |
| C | 4.13824313  | -21.87841839 | 0.43898306  |
| C | 3.98851460  | -20.61595905 | 1.14997296  |
| C | 1.68898351  | -21.87846045 | 3.80344027  |
| C | 0.99829643  | -20.61593607 | 4.02931580  |
| C | -2.44941636 | -21.87845956 | 3.36445974  |
| C | -2.99035421 | -20.61596384 | 2.87922367  |
| C | -4.13824511 | -21.87843419 | -0.43901421 |
| C | -3.98851883 | -20.61595449 | -1.14997166 |
| C | -1.68897188 | -21.87848842 | -3.80344853 |
| C | -0.99829671 | -20.61592307 | -4.02931769 |
| C | 2.44941144  | -21.87847578 | -3.36445980 |
| C | 2.99035442  | -20.61595116 | -2.87921826 |
| C | 3.36022608  | -20.61588355 | 2.43714780  |
| C | 2.89673756  | -19.36539937 | 2.99915131  |
| C | -0.43046077 | -20.61588610 | 4.12858137  |
| C | -1.14894344 | -19.36538843 | 4.00820730  |
| C | -3.79080531 | -20.61584931 | 1.69162486  |
| C | -4.04578519 | -19.36543538 | 1.00911894  |
| C | -3.36022736 | -20.61589524 | -2.43715369 |
| C | -2.89673732 | -19.36539212 | -2.99915731 |
| C | 0.43046089  | -20.61590120 | -4.12857943 |
| C | 1.14894684  | -19.36538237 | -4.00820401 |
| C | 3.79080119  | -20.61585386 | -1.69162694 |
| C | 4.04578308  | -19.36543503 | -1.00911503 |
| C | 1.69291430  | -19.36543951 | 3.81043765  |
| C | 1.00722323  | -18.12255134 | 4.04738894  |
| C | -2.45349206 | -19.36539683 | 3.37132587  |
| C | -3.00151600 | -18.12258211 | 2.89596944  |
| C | -4.14623648 | -19.36537994 | -0.43909913 |
| C | -4.00863391 | -18.12258380 | -1.15132028 |
| C | -1.69291065 | -19.36544554 | -3.81044219 |
| C | -1.00721997 | -18.12254989 | -4.04739083 |
| C | 2.45349369  | -19.36540463 | -3.37132030 |
| C | 3.00151624  | -18.12258134 | -2.89596497 |
| C | 4.14623331  | -19.36537994 | 0.43909599  |
| C | 4.00863103  | -18.12258730 | 1.15132031  |
| C | -0.43748232 | -18.12253094 | 4.14782081  |
| C | -1.15369590 | -16.86795357 | 4.00314988  |
| C | -3.81098191 | -18.12249187 | 1.69514753  |
| C | -4.04380238 | -16.86796478 | 1.00246663  |
| C | -3.37341965 | -18.12252564 | -2.45283228 |
| C | -2.88999883 | -16.86795904 | -3.00078452 |
| C | 0.43748498  | -18.12253369 | -4.14781940 |
| C | 1.15369769  | -16.86795462 | -4.00314878 |
| C | 3.81097968  | -18.12249545 | -1.69514744 |

|   |             |              |             |
|---|-------------|--------------|-------------|
| C | 4.04380099  | -16.86796789 | -1.00246619 |
| C | 3.37341902  | -18.12252589 | 2.45282733  |
| C | 2.88999914  | -16.86796237 | 3.00078205  |
| C | -2.44721871 | -16.86796966 | 3.37153537  |
| C | -3.00250520 | -15.61708584 | 2.89774200  |
| C | -4.14332244 | -16.86796457 | -0.43354450 |
| C | -4.01068110 | -15.61708171 | -1.15130287 |
| C | -1.69627280 | -16.86798738 | -3.80514433 |
| C | -1.00828250 | -15.61709251 | -4.04916672 |
| C | 2.44721964  | -16.86797226 | -3.37153294 |
| C | 3.00250458  | -15.61708903 | -2.89774118 |
| C | 4.14332076  | -16.86796777 | 0.43354442  |
| C | 4.01068051  | -15.61708436 | 1.15130206  |
| C | 1.69627397  | -16.86798777 | 3.80514295  |
| C | 1.00828434  | -15.61709318 | 4.04916601  |
| C | -3.81326978 | -15.61709090 | 1.69481535  |
| C | -4.04736234 | -14.37266591 | 1.00678516  |
| C | -3.37430307 | -15.61708689 | -2.45499751 |
| C | -2.89555043 | -14.37267970 | -3.00172236 |
| C | 0.43890100  | -15.61709107 | -4.14964162 |
| C | 1.15171877  | -14.37267371 | -4.00840774 |
| C | 3.81326951  | -15.61709353 | -1.69481385 |
| C | 4.04736193  | -14.37266734 | -1.00678419 |
| C | 3.37430226  | -15.61708955 | 2.45499702  |
| C | 2.89555061  | -14.37268091 | 3.00172220  |
| C | -0.43889872 | -15.61709030 | 4.14964210  |
| C | -1.15171808 | -14.37267159 | 4.00840811  |
| C | -4.14742230 | -14.37265267 | -0.43791380 |
| C | -4.00282368 | -13.11946346 | -1.15324349 |
| C | -1.69456441 | -14.37264663 | -3.81089812 |
| C | -1.00269928 | -13.11946033 | -4.04334110 |
| C | 2.45303323  | -14.37264875 | -3.37291016 |
| C | 3.00024696  | -13.11946162 | -2.88997902 |
| C | 4.14742185  | -14.37265407 | 0.43791343  |
| C | 4.00282352  | -13.11946437 | 1.15324372  |
| C | 1.69456481  | -14.37264897 | 3.81089802  |
| C | 1.00269932  | -13.11946058 | 4.04334127  |
| C | -2.45303303 | -14.37264758 | 3.37291065  |
| C | -3.00024697 | -13.11946029 | 2.88997911  |
| C | -3.37038683 | -13.11948784 | -2.44779270 |
| C | -2.89643203 | -11.86839508 | -3.00230717 |
| C | 0.43461030  | -13.11948922 | -4.14264665 |
| C | 1.15178245  | -11.86839441 | -4.00946535 |
| C | 3.80506329  | -13.11948571 | -1.69501775 |
| C | 4.04831226  | -11.86840683 | -1.00725817 |
| C | 3.37038679  | -13.11948915 | 2.44779300  |
| C | 2.89643217  | -11.86839550 | 3.00230737  |
| C | -0.43461010 | -13.11948901 | 4.14264687  |
| C | -1.15178245 | -11.86839425 | 4.00946541  |
| C | -3.80506331 | -13.11948482 | 1.69501818  |
| C | -4.04831231 | -11.86840642 | 1.00725842  |
| C | -1.69444790 | -11.86835032 | -3.81241819 |
| C | -1.00651792 | -10.62324909 | -4.04802688 |
| C | 2.45441174  | -11.86834642 | -3.37356699 |
| C | 3.00240452  | -10.62326484 | -2.89563774 |
| C | 4.14868192  | -11.86834385 | 0.43877630  |
| C | 4.00881739  | -10.62325804 | 1.15228060  |
| C | 1.69444793  | -11.86835026 | 3.81241844  |
| C | 1.00651790  | -10.62324870 | 4.04802697  |
| C | -2.45441143 | -11.86834576 | 3.37356713  |
| C | -3.00240447 | -10.62326466 | 2.89563786  |
| C | -4.14868203 | -11.86834340 | -0.43877625 |
| C | -4.00881746 | -10.62325815 | -1.15228004 |
| C | 0.43826552  | -10.62330674 | -4.14810541 |
| C | 1.15362226  | -9.37096753  | -4.00382368 |
| C | 3.81162617  | -10.62329484 | -1.69458559 |
| C | 4.04435913  | -9.37096893  | -1.00286215 |
| C | 3.37329664  | -10.62329647 | 2.45367924  |
| C | 2.89063725  | -9.37096889  | 3.00106617  |
| C | -0.43826554 | -10.62330692 | 4.14810548  |

|   |             |              |             |
|---|-------------|--------------|-------------|
| C | -1.15362232 | -9.37096733  | 4.00382370  |
| C | -3.81162620 | -10.62329466 | 1.69458543  |
| C | -4.04435908 | -9.37096908  | 1.00286237  |
| C | -3.37329667 | -10.62329609 | -2.45367912 |
| C | -2.89063738 | -9.37096876  | -3.00106603 |
| C | 2.44884159  | -9.37094349  | -3.37091060 |
| C | 3.00264376  | -8.11960682  | -2.89602472 |
| C | 4.14360749  | -9.37094486  | 0.43527422  |
| C | 4.00927348  | -8.11960558  | 1.15227758  |
| C | 1.69492866  | -9.37094239  | 3.80625027  |
| C | 1.00673336  | -8.11961983  | 4.04841746  |
| C | -2.44884158 | -9.37094326  | 3.37091070  |
| C | -3.00264370 | -8.11960676  | 2.89602493  |
| C | -4.14360746 | -9.37094488  | -0.43527417 |
| C | -4.00927354 | -8.11960566  | -1.15227746 |
| C | -1.69492878 | -9.37094223  | -3.80625018 |
| C | -1.00673331 | -8.11961969  | -4.04841748 |
| C | 3.81222881  | -8.11960839  | -1.69426832 |
| C | 4.04824011  | -6.87417755  | -1.00630911 |
| C | 3.37331290  | -8.11959990  | 2.45435577  |
| C | 2.89556415  | -6.87417716  | 3.00269891  |
| C | -0.43884517 | -8.11959119  | 4.14845556  |
| C | -1.15257882 | -6.87419016  | 4.00890741  |
| C | -3.81222885 | -8.11960854  | 1.69426834  |
| C | -4.04824015 | -6.87417762  | 1.00630941  |
| C | -3.37331291 | -8.11960001  | -2.45435586 |
| C | -2.89556414 | -6.87417718  | -3.00269904 |
| C | 0.43884518  | -8.11959133  | -4.14845554 |
| C | 1.15257892  | -6.87419019  | -4.00890737 |
| C | 4.14828389  | -6.87422267  | 0.43853288  |
| C | 4.00438535  | -5.62237379  | 1.15385784  |
| C | 1.69444577  | -6.87421560  | 3.81193405  |
| C | 1.00295611  | -5.62236347  | 4.04497691  |
| C | -2.45399870 | -6.87423027  | 3.37333804  |
| C | -3.00155694 | -5.62236146  | 2.89102317  |
| C | -4.14828399 | -6.87422280  | -0.43853300 |
| C | -4.00438550 | -5.62237365  | -1.15385783 |
| C | -1.69444568 | -6.87421573  | -3.81193414 |
| C | -1.00295601 | -5.62236352  | -4.04497702 |
| C | 2.45399877  | -6.87423034  | -3.37333792 |
| C | 3.00155701  | -5.62236139  | -2.89102301 |
| C | 3.37144103  | -5.62238248  | 2.44944091  |
| C | 2.89629920  | -4.37105917  | 3.00303365  |
| C | -0.43552602 | -5.62237484  | 4.14437959  |
| C | -1.15249991 | -4.37106627  | 4.00970389  |
| C | -3.80704496 | -5.62236802  | 1.69508701  |
| C | -4.04888733 | -4.37108098  | 1.00678873  |
| C | -3.37144110 | -5.62238254  | -2.44944103 |
| C | -2.89629926 | -4.37105909  | -3.00303377 |
| C | 0.43552621  | -5.62237506  | -4.14437958 |
| C | 1.15250013  | -4.37106631  | -4.00970384 |
| C | 3.80704489  | -5.62236824  | -1.69508687 |
| C | 4.04888721  | -4.37108103  | -1.00678858 |
| C | 1.69463815  | -4.37112157  | 3.81247378  |
| C | 1.00667439  | -3.12566595  | 4.04871295  |
| C | -2.45435397 | -4.37111507  | 3.37377374  |
| C | -3.00292822 | -3.12568280  | 2.89610674  |
| C | -4.14884641 | -4.37109746  | -0.43862234 |
| C | -4.00948552 | -3.12567816  | -1.15251653 |
| C | -1.69463808 | -4.37112162  | -3.81247393 |
| C | -1.00667426 | -3.12566585  | -4.04871310 |
| C | 2.45435410  | -4.37111525  | -3.37377361 |
| C | 3.00292831  | -3.12568290  | -2.89610656 |
| C | 4.14884623  | -4.37109759  | 0.43862240  |
| C | 4.00948534  | -3.12567825  | 1.15251651  |
| C | -0.43840714 | -3.12569858  | 4.14876728  |
| C | -1.15367102 | -1.87414956  | 4.00479341  |
| C | -3.81228617 | -3.12568072  | 1.69477868  |
| C | -4.04522768 | -1.87414921  | 1.00331781  |
| C | -3.37381268 | -3.12568604  | -2.45412373 |

|   |             |             |             |
|---|-------------|-------------|-------------|
| C | -2.89146153 | -1.87415397 | -3.00160092 |
| C | 0.43840735  | -3.12569861 | -4.14876730 |
| C | 1.15367117  | -1.87414961 | -4.00479341 |
| C | 3.81228612  | -3.12568075 | -1.69477849 |
| C | 4.04522759  | -1.87414931 | -1.00331768 |
| C | 3.37381255  | -3.12568615 | 2.45412365  |
| C | 2.89146147  | -1.87415407 | 3.00160075  |
| C | -2.44961000 | -1.87414850 | 3.37181721  |
| C | -3.00306166 | -0.62278623 | 2.89640951  |
| C | -4.14478737 | -1.87415232 | -0.43548562 |
| C | -4.00981800 | -0.62277344 | -1.15247220 |
| C | -1.69532558 | -1.87415189 | -3.80738481 |
| C | -1.00686163 | -0.62279824 | -4.04898099 |
| C | 2.44961012  | -1.87414848 | -3.37181708 |
| C | 3.00306174  | -0.62278616 | -2.89640937 |
| C | 4.14478719  | -1.87415244 | 0.43548564  |
| C | 4.00981784  | -0.62277359 | 1.15247218  |
| C | 1.69532560  | -1.87415215 | 3.80738466  |
| C | 1.00686170  | -0.62279842 | 4.04898085  |
| C | -3.81251531 | -0.62276215 | 1.69479144  |
| C | -4.04896198 | 0.62274561  | 1.00679625  |
| C | -3.37392784 | -0.62274288 | -2.45432973 |
| C | -2.89634728 | 0.62273294  | -3.00308724 |
| C | 0.43852271  | -0.62274539 | -4.14896999 |
| C | 1.15251820  | 0.62272077  | -4.00977818 |
| C | 3.81251527  | -0.62276225 | -1.69479130 |
| C | 4.04896191  | 0.62274561  | -1.00679618 |
| C | 3.37392773  | -0.62274308 | 2.45432957  |
| C | 2.89634721  | 0.62273268  | 3.00308708  |
| C | -0.43852260 | -0.62274555 | 4.14896992  |
| C | -1.15251806 | 0.62272054  | 4.00977817  |
| C | -4.14899342 | 0.62276409  | -0.43857807 |
| C | -4.00475030 | 1.87412759  | -1.15376615 |
| C | -1.69475931 | 0.62278044  | -3.81257314 |
| C | -1.00321885 | 1.87412698  | -4.04524596 |
| C | 2.45438877  | 0.62276121  | -3.37392565 |
| C | 3.00165662  | 1.87413315  | -2.89138314 |
| C | 4.14899330  | 0.62276393  | 0.43857808  |
| C | 4.00475022  | 1.87412747  | 1.15376605  |
| C | 1.69475933  | 0.62278029  | 3.81257297  |
| C | 1.00321895  | 1.87412673  | 4.04524579  |
| C | -2.45438868 | 0.62276117  | 3.37392571  |
| C | -3.00165656 | 1.87413311  | 2.89138319  |
| C | -3.37178175 | 1.87412630  | -2.44970845 |
| C | -2.89613556 | 3.12567916  | -3.00300892 |
| C | 0.43558287  | 1.87413208  | -4.14480846 |
| C | 1.15256879  | 3.12567577  | -4.00954790 |
| C | 3.80744403  | 1.87412955  | -1.69524671 |
| C | 4.04878810  | 3.12566585  | -1.00665694 |
| C | 3.37178167  | 1.87412609  | 2.44970834  |
| C | 2.89613557  | 3.12567894  | 3.00300873  |
| C | -0.43558273 | 1.87413192  | 4.14480840  |
| C | -1.15256867 | 3.12567560  | 4.00954785  |
| C | -3.80744405 | 1.87412956  | 1.69524680  |
| C | -4.04878812 | 3.12566590  | 1.00665699  |
| C | -1.69472432 | 3.12565322  | -3.81226392 |
| C | -1.00686474 | 4.37110935  | -4.04885398 |
| C | 2.45412535  | 3.12566019  | -3.37375002 |
| C | 3.00296099  | 4.37108745  | -2.89634334 |
| C | 4.14871084  | 3.12566940  | 0.43844173  |
| C | 4.00970758  | 4.37109347  | 1.15241768  |
| C | 1.69472437  | 3.12565292  | 3.81226375  |
| C | 1.00686481  | 4.37110913  | 4.04885381  |
| C | -2.45412522 | 3.12566005  | 3.37375007  |
| C | -3.00296090 | 4.37108742  | 2.89634335  |
| C | -4.14871092 | 3.12566950  | -0.43844176 |
| C | -4.00970765 | 4.37109369  | -1.15241775 |
| C | 0.43853945  | 4.37104490  | -4.14891129 |
| C | 1.15361978  | 5.62236877  | -4.00438649 |
| C | 3.81248442  | 4.37106812  | -1.69473985 |

|   |             |             |             |
|---|-------------|-------------|-------------|
| C | 4.04485571  | 5.62235569  | -1.00315892 |
| C | 3.37386952  | 4.37106058  | 2.45431898  |
| C | 2.89114113  | 5.62235399  | 3.00135596  |
| C | -0.43853930 | 4.37104463  | 4.14891117  |
| C | -1.15361964 | 5.62236857  | 4.00438639  |
| C | -3.81248437 | 4.37106814  | 1.69473988  |
| C | -4.04485566 | 5.62235576  | 1.00315889  |
| C | -3.37386955 | 4.37106075  | -2.45431911 |
| C | -2.89114115 | 5.62235429  | -3.00135613 |
| C | 2.44931441  | 5.62236329  | -3.37166672 |
| C | 3.00259868  | 6.87421321  | -2.89590611 |
| C | 4.14451208  | 5.62235651  | 0.43530736  |
| C | 4.00915128  | 6.87422332  | 1.15232547  |
| C | 1.69534468  | 5.62234936  | 3.80705596  |
| C | 1.00665464  | 6.87420985  | 4.04833706  |
| C | -2.44931427 | 5.62236315  | 3.37166670  |
| C | -3.00259859 | 6.87421315  | 2.89590606  |
| C | -4.14451211 | 5.62235659  | -0.43530737 |
| C | -4.00915130 | 6.87422349  | -1.15232554 |
| C | -1.69534460 | 5.62234950  | -3.80705616 |
| C | -1.00665469 | 6.87421025  | -4.04833724 |
| C | 3.81169528  | 6.87417639  | -1.69468097 |
| C | 4.04844639  | 8.11960177  | -1.00695559 |
| C | 3.37342417  | 6.87418895  | 2.45368080  |
| C | 2.89623400  | 8.11958959  | 3.00257299  |
| C | -0.43821080 | 6.87417956  | 4.14820767  |
| C | -1.15210540 | 8.11959047  | 4.00943122  |
| C | -3.81169518 | 6.87417627  | 1.69468099  |
| C | -4.04844635 | 8.11960202  | 1.00695559  |
| C | -3.37342423 | 6.87418919  | -2.45368091 |
| C | -2.89623411 | 8.11958990  | -3.00257311 |
| C | 0.43821107  | 6.87417995  | -4.14820782 |
| C | 1.15210540  | 8.11959070  | -4.00943137 |
| C | 4.14842911  | 8.11960321  | 0.43863441  |
| C | 4.00356478  | 9.37094167  | 1.15363052  |
| C | 1.69444605  | 8.11961936  | 3.81212167  |
| C | 1.00273403  | 9.37094491  | 4.04416748  |
| C | -2.45416351 | 8.11961298  | 3.37341009  |
| C | -3.00094471 | 9.37094448  | 2.89042754  |
| C | -4.14842910 | 8.11960317  | -0.43863450 |
| C | -4.00356479 | 9.37094158  | -1.15363068 |
| C | -1.69444595 | 8.11961989  | -3.81212190 |
| C | -1.00273416 | 9.37094529  | -4.04416764 |
| C | 2.45416368  | 8.11961333  | -3.37341015 |
| C | 3.00094474  | 9.37094456  | -2.89042765 |
| C | 3.37109802  | 9.37096948  | 2.44907022  |
| C | 2.89552917  | 10.62331235 | 3.00267566  |
| C | -0.43537367 | 9.37097402  | 4.14390621  |
| C | -1.15255988 | 10.62330462 | 4.00887577  |
| C | -3.80653138 | 9.37097002  | 1.69498499  |
| C | -4.04818990 | 10.62329555 | 1.00629398  |
| C | -3.37109800 | 9.37096950  | -2.44907044 |
| C | -2.89552922 | 10.62331228 | -3.00267586 |
| C | 0.43537381  | 9.37097440  | -4.14390634 |
| C | 1.15255968  | 10.62330500 | -4.00887591 |
| C | 3.80653134  | 9.37096990  | -1.69498513 |
| C | 4.04818986  | 10.62329587 | -1.00629404 |
| C | 1.69432672  | 10.62326543 | 3.81169087  |
| C | 1.00686029  | 11.86835854 | 4.04872590  |
| C | -2.45385099 | 10.62326471 | 3.37310708  |
| C | -3.00285039 | 11.86834863 | 2.89628646  |
| C | -4.14800625 | 10.62327026 | -0.43851698 |
| C | -4.00960507 | 11.86834575 | -1.15233188 |
| C | -1.69432642 | 10.62326570 | -3.81169117 |
| C | -1.00686029 | 11.86835853 | -4.04872605 |
| C | 2.45385109  | 10.62326466 | -3.37310709 |
| C | 3.00285059  | 11.86834852 | -2.89628619 |
| C | 4.14800617  | 10.62326994 | 0.43851697  |
| C | 4.00960494  | 11.86834585 | 1.15233172  |
| C | -0.43923625 | 11.86841035 | 4.14841580  |

|   |             |             |             |
|---|-------------|-------------|-------------|
| C | -1.15394041 | 13.11950380 | 4.00239244  |
| C | -3.81239457 | 11.86841184 | 1.69390661  |
| C | -4.04330866 | 13.11949366 | 1.00187404  |
| C | -3.37308971 | 11.86840626 | -2.45467320 |
| C | -2.88925493 | 13.11949646 | -3.00063394 |
| C | 0.43923649  | 11.86841027 | -4.14841585 |
| C | 1.15394068  | 13.11950313 | -4.00239230 |
| C | 3.81239462  | 11.86841165 | -1.69390661 |
| C | 4.04330874  | 13.11949355 | -1.00187409 |
| C | 3.37308950  | 11.86840653 | 2.45467315  |
| C | 2.88925476  | 13.11949774 | 3.00063358  |
| C | -2.44859122 | 13.11948359 | 3.37015391  |
| C | -3.00242785 | 14.37266817 | 2.89478215  |
| C | -4.14284448 | 13.11947306 | -0.43542222 |
| C | -4.00811131 | 14.37265868 | -1.15271067 |
| C | -1.69441765 | 13.11947600 | -3.80564403 |
| C | -1.00577536 | 14.37265805 | -4.04758521 |
| C | 2.44859123  | 13.11948273 | -3.37015392 |
| C | 3.00242838  | 14.37266732 | -2.89478191 |
| C | 4.14284415  | 13.11947350 | 0.43542232  |
| C | 4.00811057  | 14.37266127 | 1.15271076  |
| C | 1.69441739  | 13.11947674 | 3.80564398  |
| C | 1.00577501  | 14.37265951 | 4.04758485  |
| C | -3.81138522 | 14.37268572 | 1.69365073  |
| C | -4.04967664 | 15.61710730 | 1.00702852  |
| C | -3.37236921 | 14.37268165 | -2.45391077 |
| C | -2.89691189 | 15.61710290 | -3.00355109 |
| C | 0.43894384  | 14.37269231 | -4.14737904 |
| C | 1.15263349  | 15.61709997 | -4.01046128 |
| C | 3.81138546  | 14.37268377 | -1.69365036 |
| C | 4.04967700  | 15.61710682 | -1.00702618 |
| C | 3.37236835  | 14.37268298 | 2.45391081  |
| C | 2.89691086  | 15.61710579 | 3.00355019  |
| C | -0.43894332 | 14.37269366 | 4.14737873  |
| C | -1.15263220 | 15.61710248 | 4.01046066  |
| C | -4.14939580 | 15.61709738 | -0.44021727 |
| C | -4.00265795 | 16.86798635 | -1.15526412 |
| C | -1.69354445 | 15.61709901 | -3.81367890 |
| C | -1.00084764 | 16.86799843 | -4.04410297 |
| C | 2.45600342  | 15.61709817 | -3.37339675 |
| C | 3.00189220  | 16.86799126 | -2.88875023 |
| C | 4.14939473  | 15.61709845 | 0.44021926  |
| C | 4.00265624  | 16.86798735 | 1.15526553  |
| C | 1.69354333  | 15.61710165 | 3.81367818  |
| C | 1.00084716  | 16.86800184 | 4.04410088  |
| C | -2.45600268 | 15.61710071 | 3.37339605  |
| C | -3.00188955 | 16.86799398 | 2.88875081  |
| C | -3.37066729 | 16.86796531 | -2.44861016 |
| C | -2.89462345 | 18.12253902 | -3.00303269 |
| C | 0.43519465  | 16.86796086 | -4.14321519 |
| C | 1.15332321  | 18.12253714 | -4.00817769 |
| C | 3.80593850  | 16.86798586 | -1.69480271 |
| C | 4.04807434  | 18.12251364 | -1.00528006 |
| C | 3.37066441  | 16.86796894 | 2.44861089  |
| C | 2.89461869  | 18.12253884 | 3.00303265  |
| C | -0.43519438 | 16.86796402 | 4.14321320  |
| C | -1.15332283 | 18.12254082 | 4.00817494  |
| C | -3.80593754 | 16.86798640 | 1.69480421  |
| C | -4.04807306 | 18.12251606 | 1.00528330  |
| C | -1.69324127 | 18.12255310 | -3.81166207 |
| C | -1.00669163 | 19.36543175 | -4.04626508 |
| C | 2.45440426  | 18.12258941 | -3.37209805 |
| C | 3.00081328  | 19.36539702 | -2.89486961 |
| C | 4.14751217  | 18.12260569 | 0.43949293  |
| C | 4.00744372  | 19.36539682 | 1.15129861  |
| C | 1.69324044  | 18.12255704 | 3.81165914  |
| C | 1.00668863  | 19.36543296 | 4.04626185  |
| C | -2.45439991 | 18.12258843 | 3.37209761  |
| C | -3.00080799 | 19.36540519 | 2.89487146  |
| C | -4.14751395 | 18.12260397 | -0.43948969 |

|   |             |              |             |
|---|-------------|--------------|-------------|
| C | -4.00744748 | 19.36540295  | -1.15129386 |
| C | 0.44157564  | 19.36538042  | -4.14607105 |
| C | 1.15263298  | 20.61586608  | -3.98768704 |
| C | 3.81158969  | 19.36545972  | -1.69069291 |
| C | 4.02996732  | 20.61585851  | -0.99558811 |
| C | 3.36996930  | 19.36541599  | 2.45556168  |
| C | 2.87718541  | 20.61587131  | 2.99223704  |
| C | -0.44157189 | 19.36538002  | 4.14606770  |
| C | -1.15263508 | 20.61587185  | 3.98768286  |
| C | -3.81158683 | 19.36545283  | 1.69069696  |
| C | -4.02996659 | 20.61587396  | 0.99558915  |
| C | -3.36997458 | 19.36540901  | -2.45556056 |
| C | -2.87719107 | 20.61588238  | -2.99223654 |
| C | 2.43944347  | 20.61597727  | -3.35863077 |
| C | 2.99458566  | 21.87842080  | -2.88980815 |
| C | 4.12837172  | 20.61600316  | 0.43323077  |
| C | 3.99995652  | 21.87844015  | 1.14848060  |
| C | 1.68911901  | 20.61594105  | 3.79198002  |
| C | 1.00539672  | 21.87843097  | 4.03838487  |
| C | -2.43943871 | 20.61596424  | 3.35863130  |
| C | -2.99458686 | 21.87843950  | 2.88980550  |
| C | -4.12837328 | 20.61598946  | -0.43323106 |
| C | -3.99996368 | 21.87846784  | -1.14846302 |
| C | -1.68911737 | 20.61593805  | -3.79198474 |
| C | -1.00542648 | 21.87844287  | -4.03838309 |
| C | 3.80459300  | 21.87852420  | -1.68606608 |
| C | 4.09029973  | 23.11836763  | -1.02014233 |
| C | 3.36250096  | 21.87850903  | 2.45183667  |
| C | 2.92863116  | 23.11835294  | 3.03222054  |
| C | -0.44206230 | 21.87842998  | 4.13776340  |
| C | -1.16152467 | 23.11834297  | 4.05227035  |
| C | -3.80458546 | 21.87849602  | 1.68607945  |
| C | -4.09030180 | 23.11840312  | 1.02013858  |
| C | -3.36249778 | 21.87849456  | -2.45184495 |
| C | -2.92863369 | 23.11836586  | -3.03221890 |
| C | 0.44209279  | 21.87844632  | -4.13776565 |
| C | 1.16151336  | 23.11831574  | -4.05227223 |
| C | 4.19186328  | 23.11844696  | 0.45004338  |
| C | 4.09134739  | 24.33105655  | 1.22928484  |
| C | 1.70630549  | 23.11840748  | 3.85534044  |
| C | 0.98104176  | 24.33101605  | 4.15785756  |
| C | -2.48567302 | 23.11839038  | 3.40519893  |
| C | -3.11015905 | 24.33100039  | 2.92850575  |
| C | -4.19186026 | 23.11840819  | -0.45004822 |
| C | -4.09137061 | 24.33109287  | -1.22923943 |
| C | -1.70629387 | 23.11838522  | -3.85534419 |
| C | -0.98116790 | 24.33106541  | -4.15784942 |
| C | 2.48567412  | 23.11841094  | -3.40519888 |
| C | 3.11014136  | 24.33099640  | -2.92853149 |
| C | 3.48156187  | 24.33120857  | 2.47434463  |
| H | 3.30056390  | 25.28908442  | 2.97858748  |
| C | -0.40195067 | 24.33106928  | 4.25217822  |
| H | -0.92926168 | 25.28903155  | 4.34750898  |
| C | -3.88353298 | 24.33117779  | 1.77797447  |
| H | -4.22979989 | 25.28909897  | 1.36915657  |
| C | -3.48154051 | 24.33121390  | -2.47438770 |
| H | -3.30056544 | 25.28907761  | -2.97858237 |
| C | 0.40207705  | 24.33112151  | -4.25218815 |
| H | 0.92923668  | 25.28899686  | -4.34750509 |
| C | 3.88355321  | 24.33120829  | -1.77794680 |
| H | 4.22979690  | 25.28908749  | -1.36916454 |
| H | 2.97692578  | -25.28885574 | -3.30504436 |
| H | 4.35065755  | -25.28880864 | 0.92557432  |
| H | 1.37375334  | -25.28882835 | 4.23055110  |
| H | -2.97691938 | -25.28885524 | 3.30504338  |
| H | -4.35065397 | -25.28877313 | -0.92554947 |
| H | -1.37375951 | -25.28881701 | -4.23054374 |
| H | 4.37959849  | 25.28888306  | 0.77750281  |
| H | 1.51649461  | 25.28885470  | 4.18160042  |
| H | -2.86296891 | 25.28884213  | 3.40402178  |

|   |             |             |             |
|---|-------------|-------------|-------------|
| H | -4.37959256 | 25.28886717 | -0.77751301 |
| H | -1.51647109 | 25.28881911 | -4.18159966 |
| H | 2.86297033  | 25.28884110 | -3.40401960 |

Nanotube (6,6) u20v6\_  
B3LYP/STO-3G Energy: -18536.756683

|   |             |             |              |
|---|-------------|-------------|--------------|
| H | -2.29526339 | -3.82315518 | 25.92375442  |
| H | 4.45858120  | -0.07617881 | 25.92375442  |
| H | -2.16331781 | 3.89933399  | 25.92375442  |
| H | 2.29526339  | 3.82315518  | 25.92375442  |
| H | -4.45858120 | 0.07617881  | 25.92375442  |
| H | 2.16331781  | -3.89933399 | 25.92375442  |
| H | -3.82315518 | -2.29526339 | -25.92375442 |
| H | -0.07617881 | 4.45858120  | -25.92375442 |
| H | 3.89933399  | -2.16331781 | -25.92375442 |
| H | 3.82315518  | 2.29526339  | -25.92375442 |
| H | 0.07617881  | -4.45858120 | -25.92375442 |
| H | -3.89933399 | 2.16331781  | -25.92375442 |
| H | 2.29526339  | 3.82315518  | -25.92375442 |
| H | -4.45858120 | 0.07617881  | -25.92375442 |
| H | 2.16331781  | -3.89933399 | -25.92375442 |
| H | -2.29526339 | -3.82315518 | -25.92375442 |
| H | 4.45858120  | -0.07617881 | -25.92375442 |
| H | -2.16331781 | 3.89933399  | -25.92375442 |
| H | 3.82315518  | 2.29526339  | 25.92375442  |
| H | 0.07617881  | -4.45858120 | 25.92375442  |
| H | -3.89933399 | 2.16331781  | 25.92375442  |
| H | -3.82315518 | -2.29526339 | 25.92375442  |
| H | -0.07617881 | 4.45858120  | 25.92375442  |
| H | 3.89933399  | -2.16331781 | 25.92375442  |
| C | -1.76117068 | -3.89668893 | 24.96770126  |
| C | 4.25521695  | 0.42312591  | 24.96770126  |
| C | -2.49404626 | 3.47356302  | 24.96770126  |
| C | 1.76117068  | 3.89668893  | 24.96770126  |
| C | -4.25521695 | -0.42312591 | 24.96770126  |
| C | 2.49404626  | -3.47356302 | 24.96770126  |
| C | -3.89668893 | -1.76117068 | -24.96770126 |
| C | 0.42312591  | 4.25521695  | -24.96770126 |
| C | 3.47356302  | -2.49404626 | -24.96770126 |
| C | 3.89668893  | 1.76117068  | -24.96770126 |
| C | -0.42312591 | -4.25521695 | -24.96770126 |
| C | -3.47356302 | 2.49404626  | -24.96770126 |
| C | 1.76117068  | 3.89668893  | -24.96770126 |
| C | -4.25521695 | -0.42312591 | -24.96770126 |
| C | 2.49404626  | -3.47356302 | -24.96770126 |
| C | -1.76117068 | -3.89668893 | -24.96770126 |
| C | 4.25521695  | 0.42312591  | -24.96770126 |
| C | -2.49404626 | 3.47356302  | -24.96770126 |
| C | 3.89668893  | 1.76117068  | 24.96770126  |
| C | -0.42312591 | -4.25521695 | 24.96770126  |
| C | -3.47356302 | 2.49404626  | 24.96770126  |
| C | -3.89668893 | -1.76117068 | 24.96770126  |
| C | 0.42312591  | 4.25521695  | 24.96770126  |
| C | 3.47356302  | -2.49404626 | 24.96770126  |
| C | 0.36353392  | -4.19989636 | 23.75427987  |
| C | 3.45544998  | 2.41477780  | 23.75427987  |
| C | -3.81898391 | 1.78511857  | 23.75427987  |
| C | -0.36353392 | 4.19989636  | 23.75427987  |
| C | -3.45544998 | -2.41477780 | 23.75427987  |
| C | 3.81898391  | -1.78511857 | 23.75427987  |
| C | -4.19989636 | 0.36353392  | -23.75427987 |
| C | 2.41477780  | 3.45544998  | -23.75427987 |
| C | 1.78511857  | -3.81898391 | -23.75427987 |
| C | 4.19989636  | -0.36353392 | -23.75427987 |
| C | -2.41477780 | -3.45544998 | -23.75427987 |
| C | -1.78511857 | 3.81898391  | -23.75427987 |
| C | -0.36353392 | 4.19989636  | -23.75427987 |



|   |             |             |              |
|---|-------------|-------------|--------------|
| C | -3.45544998 | -2.41477780 | -23.75427987 |
| C | 3.81898391  | -1.78511857 | -23.75427987 |
| C | 0.36353392  | -4.19989636 | -23.75427987 |
| C | 3.45544998  | 2.41477780  | -23.75427987 |
| C | -3.81898391 | 1.78511857  | -23.75427987 |
| C | 4.19989636  | -0.36353392 | 23.75427987  |
| C | -2.41477780 | -3.45544998 | 23.75427987  |
| C | -1.78511857 | 3.81898391  | 23.75427987  |
| C | -4.19989636 | 0.36353392  | 23.75427987  |
| C | 2.41477780  | 3.45544998  | 23.75427987  |
| C | 1.78511857  | -3.81898391 | 23.75427987  |
| C | 2.38430306  | -3.41070015 | 22.51443088  |
| C | 1.76160144  | 3.77021710  | 22.51443088  |
| C | -4.14590451 | -0.35951695 | 22.51443088  |
| C | -2.38430306 | 3.41070015  | 22.51443088  |
| C | -1.76160144 | -3.77021710 | 22.51443088  |
| C | 4.14590451  | 0.35951695  | 22.51443088  |
| C | -3.41070015 | 2.38430306  | -22.51443088 |
| C | 3.77021710  | 1.76160144  | -22.51443088 |
| C | -0.35951695 | -4.14590451 | -22.51443088 |
| C | 3.41070015  | -2.38430306 | -22.51443088 |
| C | -3.77021710 | -1.76160144 | -22.51443088 |
| C | 0.35951695  | 4.14590451  | -22.51443088 |
| C | -2.38430306 | 3.41070015  | -22.51443088 |
| C | -1.76160144 | -3.77021710 | -22.51443088 |
| C | 4.14590451  | 0.35951695  | -22.51443088 |
| C | 2.38430306  | -3.41070015 | -22.51443088 |
| C | 1.76160144  | 3.77021710  | -22.51443088 |
| C | -4.14590451 | -0.35951695 | -22.51443088 |
| C | 3.41070015  | -2.38430306 | 22.51443088  |
| C | -3.77021710 | -1.76160144 | 22.51443088  |
| C | 0.35951695  | 4.14590451  | 22.51443088  |
| C | -3.41070015 | 2.38430306  | 22.51443088  |
| C | 3.77021710  | 1.76160144  | 22.51443088  |
| C | -0.35951695 | -4.14590451 | 22.51443088  |
| C | 3.76255171  | -1.74876878 | 21.25264920  |
| C | -0.36679767 | 4.13284975  | 21.25264920  |
| C | -3.39575404 | -2.38408097 | 21.25264920  |
| C | -3.76255171 | 1.74876878  | 21.25264920  |
| C | 0.36679767  | -4.13284975 | 21.25264920  |
| C | 3.39575404  | 2.38408097  | 21.25264920  |
| C | -1.74876878 | 3.76255171  | -21.25264920 |
| C | 4.13284975  | -0.36679767 | -21.25264920 |
| C | -2.38408097 | -3.39575404 | -21.25264920 |
| C | 1.74876878  | -3.76255171 | -21.25264920 |
| C | -4.13284975 | 0.36679767  | -21.25264920 |
| C | 2.38408097  | 3.39575404  | -21.25264920 |
| C | -3.76255171 | 1.74876878  | -21.25264920 |
| C | 0.36679767  | -4.13284975 | -21.25264920 |
| C | 3.39575404  | 2.38408097  | -21.25264920 |
| C | 3.76255171  | -1.74876878 | -21.25264920 |
| C | -0.36679767 | 4.13284975  | -21.25264920 |
| C | -3.39575404 | -2.38408097 | -21.25264920 |
| C | 1.74876878  | -3.76255171 | 21.25264920  |
| C | -4.13284975 | 0.36679767  | 21.25264920  |
| C | 2.38408097  | 3.39575404  | 21.25264920  |
| C | -1.74876878 | 3.76255171  | 21.25264920  |
| C | 4.13284975  | -0.36679767 | 21.25264920  |
| C | -2.38408097 | -3.39575404 | 21.25264920  |
| C | 4.15179397  | 0.36232370  | 20.00003627  |
| C | -2.38967852 | 3.41439720  | 20.00003627  |
| C | -1.76211546 | -3.77672090 | 20.00003627  |
| C | -4.15179397 | -0.36232370 | 20.00003627  |
| C | 2.38967852  | -3.41439720 | 20.00003627  |
| C | 1.76211546  | 3.77672090  | 20.00003627  |
| C | 0.36232370  | 4.15179397  | -20.00003627 |
| C | 3.41439720  | -2.38967852 | -20.00003627 |
| C | -3.77672090 | -1.76211546 | -20.00003627 |
| C | -0.36232370 | -4.15179397 | -20.00003627 |
| C | -3.41439720 | 2.38967852  | -20.00003627 |

|   |             |             |              |
|---|-------------|-------------|--------------|
| C | 3.77672090  | 1.76211546  | -20.00003627 |
| C | -4.15179397 | -0.36232370 | -20.00003627 |
| C | 2.38967852  | -3.41439720 | -20.00003627 |
| C | 1.76211546  | 3.77672090  | -20.00003627 |
| C | 4.15179397  | 0.36232370  | -20.00003627 |
| C | -2.38967852 | 3.41439720  | -20.00003627 |
| C | -1.76211546 | -3.77672090 | -20.00003627 |
| C | -0.36232370 | -4.15179397 | 20.00003627  |
| C | -3.41439720 | 2.38967852  | 20.00003627  |
| C | 3.77672090  | 1.76211546  | 20.00003627  |
| C | 0.36232370  | 4.15179397  | 20.00003627  |
| C | 3.41439720  | -2.38967852 | 20.00003627  |
| C | -3.77672090 | -1.76211546 | 20.00003627  |
| C | 3.41742420  | 2.39258016  | 18.75700463  |
| C | -3.78074730 | 1.76328609  | 18.75700463  |
| C | 0.36332310  | -4.15586625 | 18.75700463  |
| C | -3.41742420 | -2.39258016 | 18.75700463  |
| C | 3.78074730  | -1.76328609 | 18.75700463  |
| C | -0.36332310 | 4.15586625  | 18.75700463  |
| C | 2.39258016  | 3.41742420  | -18.75700463 |
| C | 1.76328609  | -3.78074730 | -18.75700463 |
| C | -4.15586625 | 0.36332310  | -18.75700463 |
| C | -2.39258016 | -3.41742420 | -18.75700463 |
| C | -1.76328609 | 3.78074730  | -18.75700463 |
| C | 4.15586625  | -0.36332310 | -18.75700463 |
| C | -3.41742420 | -2.39258016 | -18.75700463 |
| C | 3.78074730  | -1.76328609 | -18.75700463 |
| C | -0.36332310 | 4.15586625  | -18.75700463 |
| C | 3.41742420  | 2.39258016  | -18.75700463 |
| C | -3.78074730 | 1.76328609  | -18.75700463 |
| C | 0.36332310  | -4.15586625 | -18.75700463 |
| C | -2.39258016 | -3.41742420 | 18.75700463  |
| C | -1.76328609 | 3.78074730  | 18.75700463  |
| C | 4.15586625  | -0.36332310 | 18.75700463  |
| C | 2.39258016  | 3.41742420  | 18.75700463  |
| C | 1.76328609  | -3.78074730 | 18.75700463  |
| C | -4.15586625 | 0.36332310  | 18.75700463  |
| C | 1.75696883  | 3.77769195  | 17.50351924  |
| C | -4.15006161 | -0.36726634 | 17.50351924  |
| C | 2.39309278  | -3.41042561 | 17.50351924  |
| C | -1.75696883 | -3.77769195 | 17.50351924  |
| C | 4.15006161  | 0.36726634  | 17.50351924  |
| C | -2.39309278 | 3.41042561  | 17.50351924  |
| C | 3.77769195  | 1.75696883  | -17.50351924 |
| C | -0.36726634 | -4.15006161 | -17.50351924 |
| C | -3.41042561 | 2.39309278  | -17.50351924 |
| C | -3.77769195 | -1.75696883 | -17.50351924 |
| C | 0.36726634  | 4.15006161  | -17.50351924 |
| C | 3.41042561  | -2.39309278 | -17.50351924 |
| C | -1.75696883 | -3.77769195 | -17.50351924 |
| C | 4.15006161  | 0.36726634  | -17.50351924 |
| C | -2.39309278 | 3.41042561  | -17.50351924 |
| C | 1.75696883  | 3.77769195  | -17.50351924 |
| C | -4.15006161 | -0.36726634 | -17.50351924 |
| C | 2.39309278  | -3.41042561 | -17.50351924 |
| C | -3.77769195 | -1.75696883 | 17.50351924  |
| C | 0.36726634  | 4.15006161  | 17.50351924  |
| C | 3.41042561  | -2.39309278 | 17.50351924  |
| C | 3.77769195  | 1.75696883  | 17.50351924  |
| C | -0.36726634 | -4.15006161 | 17.50351924  |
| C | -3.41042561 | 2.39309278  | 17.50351924  |
| C | -0.36404318 | 4.15620082  | 16.25029113  |
| C | -3.41735391 | -2.39337105 | 16.25029113  |
| C | 3.78139708  | -1.76282977 | 16.25029113  |
| C | 0.36404318  | -4.15620082 | 16.25029113  |
| C | 3.41735391  | 2.39337105  | 16.25029113  |
| C | -3.78139708 | 1.76282977  | 16.25029113  |
| C | 4.15620082  | -0.36404318 | -16.25029113 |
| C | -2.39337105 | -3.41735391 | -16.25029113 |
| C | -1.76282977 | 3.78139708  | -16.25029113 |

|   |             |             |              |
|---|-------------|-------------|--------------|
| C | -4.15620082 | 0.36404318  | -16.25029113 |
| C | 2.39337105  | 3.41735391  | -16.25029113 |
| C | 1.76282977  | -3.78139708 | -16.25029113 |
| C | 0.36404318  | -4.15620082 | -16.25029113 |
| C | 3.41735391  | 2.39337105  | -16.25029113 |
| C | -3.78139708 | 1.76282977  | -16.25029113 |
| C | -0.36404318 | 4.15620082  | -16.25029113 |
| C | -3.41735391 | -2.39337105 | -16.25029113 |
| C | 3.78139708  | -1.76282977 | -16.25029113 |
| C | -4.15620082 | 0.36404318  | 16.25029113  |
| C | 2.39337105  | 3.41735391  | 16.25029113  |
| C | 1.76282977  | -3.78139708 | 16.25029113  |
| C | 4.15620082  | -0.36404318 | 16.25029113  |
| C | -2.39337105 | -3.41735391 | 16.25029113  |
| C | -1.76282977 | 3.78139708  | 16.25029113  |
| C | -2.39303141 | 3.41815915  | 15.00517917  |
| C | -1.76369696 | -3.78150557 | 15.00517917  |
| C | 4.15672837  | 0.36334642  | 15.00517917  |
| C | 2.39303141  | -3.41815915 | 15.00517917  |
| C | 1.76369696  | 3.78150557  | 15.00517917  |
| C | -4.15672837 | -0.36334642 | 15.00517917  |
| C | 3.41815915  | -2.39303141 | -15.00517917 |
| C | -3.78150557 | -1.76369696 | -15.00517917 |
| C | 0.36334642  | 4.15672837  | -15.00517917 |
| C | -3.41815915 | 2.39303141  | -15.00517917 |
| C | 3.78150557  | 1.76369696  | -15.00517917 |
| C | -0.36334642 | -4.15672837 | -15.00517917 |
| C | 2.39303141  | -3.41815915 | -15.00517917 |
| C | 1.76369696  | 3.78150557  | -15.00517917 |
| C | -4.15672837 | -0.36334642 | -15.00517917 |
| C | -2.39303141 | 3.41815915  | -15.00517917 |
| C | -1.76369696 | -3.78150557 | -15.00517917 |
| C | 4.15672837  | 0.36334642  | -15.00517917 |
| C | -3.41815915 | 2.39303141  | 15.00517917  |
| C | 3.78150557  | 1.76369696  | 15.00517917  |
| C | -0.36334642 | -4.15672837 | 15.00517917  |
| C | 3.41815915  | -2.39303141 | 15.00517917  |
| C | -3.78150557 | -1.76369696 | 15.00517917  |
| C | 0.36334642  | 4.15672837  | 15.00517917  |
| C | -3.77734595 | 1.75769914  | 13.75340930  |
| C | 0.36646087  | -4.15012712 | 13.75340930  |
| C | 3.41088508  | 2.39242798  | 13.75340930  |
| C | 3.77734595  | -1.75769914 | 13.75340930  |
| C | -0.36646087 | 4.15012712  | 13.75340930  |
| C | -3.41088508 | -2.39242798 | 13.75340930  |
| C | 1.75769914  | -3.77734595 | -13.75340930 |
| C | -4.15012712 | 0.36646087  | -13.75340930 |
| C | 2.39242798  | 3.41088508  | -13.75340930 |
| C | -1.75769914 | 3.77734595  | -13.75340930 |
| C | 4.15012712  | -0.36646087 | -13.75340930 |
| C | -2.39242798 | -3.41088508 | -13.75340930 |
| C | 3.77734595  | -1.75769914 | -13.75340930 |
| C | -0.36646087 | 4.15012712  | -13.75340930 |
| C | -3.41088508 | -2.39242798 | -13.75340930 |
| C | -3.77734595 | 1.75769914  | -13.75340930 |
| C | 0.36646087  | -4.15012712 | -13.75340930 |
| C | 3.41088508  | 2.39242798  | -13.75340930 |
| C | -1.75769914 | 3.77734595  | 13.75340930  |
| C | 4.15012712  | -0.36646087 | 13.75340930  |
| C | -2.39242798 | -3.41088508 | 13.75340930  |
| C | 1.75769914  | -3.77734595 | 13.75340930  |
| C | -4.15012712 | 0.36646087  | 13.75340930  |
| C | 2.39242798  | 3.41088508  | 13.75340930  |
| C | -4.15454564 | -0.36441798 | 12.49962229  |
| C | 2.39286805  | -3.41573308 | 12.49962229  |
| C | 1.76167760  | 3.78015106  | 12.49962229  |
| C | 4.15454564  | 0.36441798  | 12.49962229  |
| C | -2.39286805 | 3.41573308  | 12.49962229  |
| C | -1.76167760 | -3.78015106 | 12.49962229  |
| C | -0.36441798 | -4.15454564 | -12.49962229 |

|   |             |             |              |
|---|-------------|-------------|--------------|
| C | -3.41573308 | 2.39286805  | -12.49962229 |
| C | 3.78015106  | 1.76167760  | -12.49962229 |
| C | 0.36441798  | 4.15454564  | -12.49962229 |
| C | 3.41573308  | -2.39286805 | -12.49962229 |
| C | -3.78015106 | -1.76167760 | -12.49962229 |
| C | 4.15454564  | 0.36441798  | -12.49962229 |
| C | -2.39286805 | 3.41573308  | -12.49962229 |
| C | -1.76167760 | -3.78015106 | -12.49962229 |
| C | -4.15454564 | -0.36441798 | -12.49962229 |
| C | 2.39286805  | -3.41573308 | -12.49962229 |
| C | 1.76167760  | 3.78015106  | -12.49962229 |
| C | 0.36441798  | 4.15454564  | 12.49962229  |
| C | 3.41573308  | -2.39286805 | 12.49962229  |
| C | -3.78015106 | -1.76167760 | 12.49962229  |
| C | -0.36441798 | -4.15454564 | 12.49962229  |
| C | -3.41573308 | 2.39286805  | 12.49962229  |
| C | 3.78015106  | 1.76167760  | 12.49962229  |
| C | -3.41830912 | -2.39307647 | 11.25351792  |
| C | 3.78161957  | -1.76380430 | 11.25351792  |
| C | -0.36331045 | 4.15688077  | 11.25351792  |
| C | 3.41830912  | 2.39307647  | 11.25351792  |
| C | -3.78161957 | 1.76380430  | 11.25351792  |
| C | 0.36331045  | -4.15688077 | 11.25351792  |
| C | -2.39307647 | -3.41830912 | -11.25351792 |
| C | -1.76380430 | 3.78161957  | -11.25351792 |
| C | 4.15688077  | -0.36331045 | -11.25351792 |
| C | 2.39307647  | 3.41830912  | -11.25351792 |
| C | 1.76380430  | -3.78161957 | -11.25351792 |
| C | -4.15688077 | 0.36331045  | -11.25351792 |
| C | 3.41830912  | 2.39307647  | -11.25351792 |
| C | -3.78161957 | 1.76380430  | -11.25351792 |
| C | 0.36331045  | -4.15688077 | -11.25351792 |
| C | -3.41830912 | -2.39307647 | -11.25351792 |
| C | 3.78161957  | -1.76380430 | -11.25351792 |
| C | -0.36331045 | 4.15688077  | -11.25351792 |
| C | 2.39307647  | 3.41830912  | 11.25351792  |
| C | 1.76380430  | -3.78161957 | 11.25351792  |
| C | -4.15688077 | 0.36331045  | 11.25351792  |
| C | -2.39307647 | -3.41830912 | 11.25351792  |
| C | -1.76380430 | 3.78161957  | 11.25351792  |
| C | 4.15688077  | -0.36331045 | 11.25351792  |
| C | -1.75837999 | -3.77780345 | 10.00293397  |
| C | 4.15086375  | 0.36609999  | 10.00293397  |
| C | -2.39248376 | 3.41170347  | 10.00293397  |
| C | 1.75837999  | 3.77780345  | 10.00293397  |
| C | -4.15086375 | -0.36609999 | 10.00293397  |
| C | 2.39248376  | -3.41170347 | 10.00293397  |
| C | -3.77780345 | -1.75837999 | -10.00293397 |
| C | 0.36609999  | 4.15086375  | -10.00293397 |
| C | 3.41170347  | -2.39248376 | -10.00293397 |
| C | 3.77780345  | 1.75837999  | -10.00293397 |
| C | -0.36609999 | -4.15086375 | -10.00293397 |
| C | -3.41170347 | 2.39248376  | -10.00293397 |
| C | 1.75837999  | 3.77780345  | -10.00293397 |
| C | -4.15086375 | -0.36609999 | -10.00293397 |
| C | 2.39248376  | -3.41170347 | -10.00293397 |
| C | -1.75837999 | -3.77780345 | -10.00293397 |
| C | 4.15086375  | 0.36609999  | -10.00293397 |
| C | -2.39248376 | 3.41170347  | -10.00293397 |
| C | 3.77780345  | 1.75837999  | 10.00293397  |
| C | -0.36609999 | -4.15086375 | 10.00293397  |
| C | -3.41170347 | 2.39248376  | 10.00293397  |
| C | -3.77780345 | -1.75837999 | 10.00293397  |
| C | 0.36609999  | 4.15086375  | 10.00293397  |
| C | 3.41170347  | -2.39248376 | 10.00293397  |
| C | 0.36482229  | -4.15367080 | 8.74913656   |
| C | 3.41477329  | 2.39278077  | 8.74913656   |
| C | -3.77959558 | 1.76089003  | 8.74913656   |
| C | -0.36482229 | 4.15367080  | 8.74913656   |
| C | -3.41477329 | -2.39278077 | 8.74913656   |

|   |             |             |             |
|---|-------------|-------------|-------------|
| C | 3.77959558  | -1.76089003 | 8.74913656  |
| C | -4.15367080 | 0.36482229  | -8.74913656 |
| C | 2.39278077  | 3.41477329  | -8.74913656 |
| C | 1.76089003  | -3.77959558 | -8.74913656 |
| C | 4.15367080  | -0.36482229 | -8.74913656 |
| C | -2.39278077 | -3.41477329 | -8.74913656 |
| C | -1.76089003 | 3.77959558  | -8.74913656 |
| C | -0.36482229 | 4.15367080  | -8.74913656 |
| C | -3.41477329 | -2.39278077 | -8.74913656 |
| C | 3.77959558  | -1.76089003 | -8.74913656 |
| C | 0.36482229  | -4.15367080 | -8.74913656 |
| C | 3.41477329  | 2.39278077  | -8.74913656 |
| C | -3.77959558 | 1.76089003  | -8.74913656 |
| C | 4.15367080  | -0.36482229 | 8.74913656  |
| C | -2.39278077 | -3.41477329 | 8.74913656  |
| C | -1.76089003 | 3.77959558  | 8.74913656  |
| C | -4.15367080 | 0.36482229  | 8.74913656  |
| C | 2.39278077  | 3.41477329  | 8.74913656  |
| C | 1.76089003  | -3.77959558 | 8.74913656  |
| C | 2.39314964  | -3.41834258 | 7.50226089  |
| C | 1.76379670  | 3.78169967  | 7.50226089  |
| C | -4.15694633 | -0.36335709 | 7.50226089  |
| C | -2.39314964 | 3.41834258  | 7.50226089  |
| C | -1.76379670 | -3.78169967 | 7.50226089  |
| C | 4.15694633  | 0.36335709  | 7.50226089  |
| C | -3.41834258 | 2.39314964  | -7.50226089 |
| C | 3.78169967  | 1.76379670  | -7.50226089 |
| C | -0.36335709 | -4.15694633 | -7.50226089 |
| C | 3.41834258  | -2.39314964 | -7.50226089 |
| C | -3.78169967 | -1.76379670 | -7.50226089 |
| C | 0.36335709  | 4.15694633  | -7.50226089 |
| C | -2.39314964 | 3.41834258  | -7.50226089 |
| C | -1.76379670 | -3.78169967 | -7.50226089 |
| C | 4.15694633  | 0.36335709  | -7.50226089 |
| C | 2.39314964  | -3.41834258 | -7.50226089 |
| C | 1.76379670  | 3.78169967  | -7.50226089 |
| C | -4.15694633 | -0.36335709 | -7.50226089 |
| C | 3.41834258  | -2.39314964 | 7.50226089  |
| C | -3.78169967 | -1.76379670 | 7.50226089  |
| C | 0.36335709  | 4.15694633  | 7.50226089  |
| C | -3.41834258 | 2.39314964  | 7.50226089  |
| C | 3.78169967  | 1.76379670  | 7.50226089  |
| C | -0.36335709 | -4.15694633 | 7.50226089  |
| C | 3.77823193  | -1.75892833 | 6.25277244  |
| C | -0.36583935 | 4.15150900  | 6.25277244  |
| C | -3.41239259 | -2.39258067 | 6.25277244  |
| C | -3.77823193 | 1.75892833  | 6.25277244  |
| C | 0.36583935  | -4.15150900 | 6.25277244  |
| C | 3.41239259  | 2.39258067  | 6.25277244  |
| C | -1.75892833 | 3.77823193  | -6.25277244 |
| C | 4.15150900  | -0.36583935 | -6.25277244 |
| C | -2.39258067 | -3.41239259 | -6.25277244 |
| C | 1.75892833  | -3.77823193 | -6.25277244 |
| C | -4.15150900 | 0.36583935  | -6.25277244 |
| C | 2.39258067  | 3.41239259  | -6.25277244 |
| C | -3.77823193 | 1.75892833  | -6.25277244 |
| C | 0.36583935  | -4.15150900 | -6.25277244 |
| C | 3.41239259  | 2.39258067  | -6.25277244 |
| C | 3.77823193  | -1.75892833 | -6.25277244 |
| C | -0.36583935 | 4.15150900  | -6.25277244 |
| C | -3.41239259 | -2.39258067 | -6.25277244 |
| C | 1.75892833  | -3.77823193 | 6.25277244  |
| C | -4.15150900 | 0.36583935  | 6.25277244  |
| C | 2.39258067  | 3.41239259  | 6.25277244  |
| C | -1.75892833 | 3.77823193  | 6.25277244  |
| C | 4.15150900  | -0.36583935 | 6.25277244  |
| C | -2.39258067 | -3.41239259 | 6.25277244  |
| C | 4.15306379  | 0.36508065  | 4.99885176  |
| C | -2.39270101 | 3.41411842  | 4.99885176  |
| C | -1.76036278 | -3.77919907 | 4.99885176  |

|   |             |             |             |
|---|-------------|-------------|-------------|
| C | -4.15306379 | -0.36508065 | 4.99885176  |
| C | 2.39270101  | -3.41411842 | 4.99885176  |
| C | 1.76036278  | 3.77919907  | 4.99885176  |
| C | 0.36508065  | 4.15306379  | -4.99885176 |
| C | 3.41411842  | -2.39270101 | -4.99885176 |
| C | -3.77919907 | -1.76036278 | -4.99885176 |
| C | -0.36508065 | -4.15306379 | -4.99885176 |
| C | -3.41411842 | 2.39270101  | -4.99885176 |
| C | 3.77919907  | 1.76036278  | -4.99885176 |
| C | -4.15306379 | -0.36508065 | -4.99885176 |
| C | 2.39270101  | -3.41411842 | -4.99885176 |
| C | 1.76036278  | 3.77919907  | -4.99885176 |
| C | 4.15306379  | 0.36508065  | -4.99885176 |
| C | -2.39270101 | 3.41411842  | -4.99885176 |
| C | -1.76036278 | -3.77919907 | -4.99885176 |
| C | -0.36508065 | -4.15306379 | 4.99885176  |
| C | -3.41411842 | 2.39270101  | 4.99885176  |
| C | 3.77919907  | 1.76036278  | 4.99885176  |
| C | 0.36508065  | 4.15306379  | 4.99885176  |
| C | 3.41411842  | -2.39270101 | 4.99885176  |
| C | -3.77919907 | -1.76036278 | 4.99885176  |
| C | 3.41840071  | 2.39309416  | 3.75134445  |
| C | -3.78168069 | 1.76387478  | 3.75134445  |
| C | 0.36327998  | -4.15696894 | 3.75134445  |
| C | -3.41840071 | -2.39309416 | 3.75134445  |
| C | 3.78168069  | -1.76387478 | 3.75134445  |
| C | -0.36327998 | 4.15696894  | 3.75134445  |
| C | 2.39309416  | 3.41840071  | -3.75134445 |
| C | 1.76387478  | -3.78168069 | -3.75134445 |
| C | -4.15696894 | 0.36327998  | -3.75134445 |
| C | -2.39309416 | -3.41840071 | -3.75134445 |
| C | -1.76387478 | 3.78168069  | -3.75134445 |
| C | 4.15696894  | -0.36327998 | -3.75134445 |
| C | -3.41840071 | -2.39309416 | -3.75134445 |
| C | 3.78168069  | -1.76387478 | -3.75134445 |
| C | -0.36327998 | 4.15696894  | -3.75134445 |
| C | 3.41840071  | 2.39309416  | -3.75134445 |
| C | -3.78168069 | 1.76387478  | -3.75134445 |
| C | 0.36327998  | -4.15696894 | -3.75134445 |
| C | -2.39309416 | -3.41840071 | 3.75134445  |
| C | -1.76387478 | 3.78168069  | 3.75134445  |
| C | 4.15696894  | -0.36327998 | 3.75134445  |
| C | 2.39309416  | 3.41840071  | 3.75134445  |
| C | 1.76387478  | -3.78168069 | 3.75134445  |
| C | -4.15696894 | 0.36327998  | 3.75134445  |
| C | 1.75940600  | 3.77860135  | 2.50243926  |
| C | -4.15206777 | -0.36561038 | 2.50243926  |
| C | 2.39266176  | -3.41299097 | 2.50243926  |
| C | -1.75940600 | -3.77860135 | 2.50243926  |
| C | 4.15206777  | 0.36561038  | 2.50243926  |
| C | -2.39266176 | 3.41299097  | 2.50243926  |
| C | 3.77860135  | 1.75940600  | -2.50243926 |
| C | -0.36561038 | -4.15206777 | -2.50243926 |
| C | -3.41299097 | 2.39266176  | -2.50243926 |
| C | -3.77860135 | -1.75940600 | -2.50243926 |
| C | 0.36561038  | 4.15206777  | -2.50243926 |
| C | 3.41299097  | -2.39266176 | -2.50243926 |
| C | -1.75940600 | -3.77860135 | -2.50243926 |
| C | 4.15206777  | 0.36561038  | -2.50243926 |
| C | -2.39266176 | 3.41299097  | -2.50243926 |
| C | 1.75940600  | 3.77860135  | -2.50243926 |
| C | -4.15206777 | -0.36561038 | -2.50243926 |
| C | 2.39266176  | -3.41299097 | -2.50243926 |
| C | -3.77860135 | -1.75940600 | 2.50243926  |
| C | 0.36561038  | 4.15206777  | 2.50243926  |
| C | 3.41299097  | -2.39266176 | 2.50243926  |
| C | 3.77860135  | 1.75940600  | 2.50243926  |
| C | -0.36561038 | -4.15206777 | 2.50243926  |
| C | -3.41299097 | 2.39266176  | 2.50243926  |
| C | -0.36536580 | 4.15256837  | 1.24831768  |

|   |             |             |             |
|---|-------------|-------------|-------------|
| C | -3.41354680 | -2.39270025 | 1.24831768  |
| C | 3.77891260  | -1.75986812 | 1.24831768  |
| C | 0.36536580  | -4.15256837 | 1.24831768  |
| C | 3.41354680  | 2.39270025  | 1.24831768  |
| C | -3.77891260 | 1.75986812  | 1.24831768  |
| C | 4.15256837  | -0.36536580 | -1.24831768 |
| C | -2.39270025 | -3.41354680 | -1.24831768 |
| C | -1.75986812 | 3.77891260  | -1.24831768 |
| C | -4.15256837 | 0.36536580  | -1.24831768 |
| C | 2.39270025  | 3.41354680  | -1.24831768 |
| C | 1.75986812  | -3.77891260 | -1.24831768 |
| C | 0.36536580  | -4.15256837 | -1.24831768 |
| C | 3.41354680  | 2.39270025  | -1.24831768 |
| C | -3.77891260 | 1.75986812  | -1.24831768 |
| C | -0.36536580 | 4.15256837  | -1.24831768 |
| C | -3.41354680 | -2.39270025 | -1.24831768 |
| C | 3.77891260  | -1.75986812 | -1.24831768 |
| C | -4.15256837 | 0.36536580  | 1.24831768  |
| C | 2.39270025  | 3.41354680  | 1.24831768  |
| C | 1.75986812  | -3.77891260 | 1.24831768  |
| C | 4.15256837  | -0.36536580 | 1.24831768  |
| C | -2.39270025 | -3.41354680 | 1.24831768  |
| C | -1.75986812 | 3.77891260  | 1.24831768  |
| C | -2.39312644 | 3.41842717  | 0.00000000  |
| C | -1.76388155 | -3.78172188 | 0.00000000  |
| C | 4.15700800  | 0.36329471  | 0.00000000  |
| C | 2.39312644  | -3.41842717 | 0.00000000  |
| C | 1.76388155  | 3.78172188  | 0.00000000  |
| C | -4.15700800 | -0.36329471 | 0.00000000  |
| C | 3.41842717  | -2.39312644 | 0.00000000  |
| C | -3.78172188 | -1.76388155 | 0.00000000  |
| C | 0.36329471  | 4.15700800  | 0.00000000  |
| C | -3.41842717 | 2.39312644  | 0.00000000  |
| C | 3.78172188  | 1.76388155  | 0.00000000  |
| C | -0.36329471 | -4.15700800 | 0.00000000  |

Nanotube (6,6) u21v0s  
B3LYP/STO-3G Energy: -18988.531575

|   |           |           |           |
|---|-----------|-----------|-----------|
| 6 | -3.993311 | -1.507042 | 25.600979 |
| 6 | -3.301792 | -2.704788 | 25.600979 |
| 6 | -0.691519 | -4.211830 | 25.600979 |
| 6 | 0.691519  | -4.211830 | 25.600979 |
| 6 | 3.301792  | -2.704788 | 25.600979 |
| 6 | 3.993311  | -1.507042 | 25.600979 |
| 6 | 3.993311  | 1.507042  | 25.600979 |
| 6 | 3.301792  | 2.704788  | 25.600979 |
| 6 | 0.691519  | 4.211830  | 25.600979 |
| 6 | -0.691519 | 4.211830  | 25.600979 |
| 6 | -3.301792 | 2.704788  | 25.600979 |
| 6 | -3.993311 | 1.507042  | 25.600979 |
| 6 | -2.708823 | -3.223558 | 24.384605 |
| 6 | -1.437271 | -3.957688 | 24.384605 |
| 6 | 1.437271  | -3.957688 | 24.384605 |
| 6 | 2.708823  | -3.223558 | 24.384605 |
| 6 | 4.146094  | -0.734131 | 24.384605 |
| 6 | 4.146094  | 0.734131  | 24.384605 |
| 6 | 2.708823  | 3.223558  | 24.384605 |
| 6 | 1.437271  | 3.957688  | 24.384605 |
| 6 | -1.437271 | 3.957688  | 24.384605 |
| 6 | -2.708823 | 3.223558  | 24.384605 |
| 6 | -4.146094 | 0.734131  | 24.384605 |
| 6 | -4.146094 | -0.734131 | 24.384605 |
| 6 | -0.726187 | -4.097940 | 23.144225 |
| 6 | 0.726187  | -4.097940 | 23.144225 |
| 6 | 3.185827  | -2.677867 | 23.144225 |
| 6 | 3.912014  | -1.420073 | 23.144225 |
| 6 | 3.912014  | 1.420073  | 23.144225 |

|   |           |           |           |
|---|-----------|-----------|-----------|
| 6 | 3.185827  | 2.677867  | 23.144225 |
| 6 | 0.726187  | 4.097940  | 23.144225 |
| 6 | -0.726187 | 4.097940  | 23.144225 |
| 6 | -3.185827 | 2.677867  | 23.144225 |
| 6 | -3.912014 | 1.420073  | 23.144225 |
| 6 | -3.912014 | -1.420073 | 23.144225 |
| 6 | -3.185827 | -2.677867 | 23.144225 |
| 6 | 1.424100  | -3.896616 | 21.883505 |
| 6 | 2.662519  | -3.181615 | 21.883505 |
| 6 | 4.086619  | -0.715002 | 21.883505 |
| 6 | 4.086619  | 0.715002  | 21.883505 |
| 6 | 2.662519  | 3.181615  | 21.883505 |
| 6 | 1.424100  | 3.896616  | 21.883505 |
| 6 | -1.424100 | 3.896616  | 21.883505 |
| 6 | -2.662519 | 3.181615  | 21.883505 |
| 6 | -4.086619 | 0.715002  | 21.883505 |
| 6 | -4.086619 | -0.715002 | 21.883505 |
| 6 | -2.662519 | -3.181615 | 21.883505 |
| 6 | -1.424100 | -3.896616 | 21.883505 |
| 6 | 3.190870  | -2.677227 | 20.628995 |
| 6 | 3.913982  | -1.424761 | 20.628995 |
| 6 | 3.913982  | 1.424761  | 20.628995 |
| 6 | 3.190870  | 2.677227  | 20.628995 |
| 6 | 0.723111  | 4.101988  | 20.628995 |
| 6 | -0.723111 | 4.101988  | 20.628995 |
| 6 | -3.190870 | 2.677227  | 20.628995 |
| 6 | -3.913982 | 1.424761  | 20.628995 |
| 6 | -3.913982 | -1.424761 | 20.628995 |
| 6 | -3.190870 | -2.677227 | 20.628995 |
| 6 | -0.723111 | -4.101988 | 20.628995 |
| 6 | 0.723111  | -4.101988 | 20.628995 |
| 6 | 4.108312  | -0.725037 | 19.385158 |
| 6 | 4.108312  | 0.725037  | 19.385158 |
| 6 | 2.682057  | 3.195384  | 19.385158 |
| 6 | 1.426255  | 3.920421  | 19.385158 |
| 6 | -1.426255 | 3.920421  | 19.385158 |
| 6 | -2.682057 | 3.195384  | 19.385158 |
| 6 | -4.108312 | 0.725037  | 19.385158 |
| 6 | -4.108312 | -0.725037 | 19.385158 |
| 6 | -2.682057 | -3.195384 | 19.385158 |
| 6 | -1.426255 | -3.920421 | 19.385158 |
| 6 | 1.426255  | -3.920421 | 19.385158 |
| 6 | 2.682057  | -3.195384 | 19.385158 |
| 6 | 3.912511  | 1.428538  | 18.133223 |
| 6 | 3.193406  | 2.674065  | 18.133223 |
| 6 | 0.719105  | 4.102603  | 18.133223 |
| 6 | -0.719105 | 4.102603  | 18.133223 |
| 6 | -3.193406 | 2.674065  | 18.133223 |
| 6 | -3.912511 | 1.428538  | 18.133223 |
| 6 | -3.912511 | -1.428538 | 18.133223 |
| 6 | -3.193406 | -2.674065 | 18.133223 |
| 6 | -0.719105 | -4.102603 | 18.133223 |
| 6 | 0.719105  | -4.102603 | 18.133223 |
| 6 | 3.193406  | -2.674065 | 18.133223 |
| 6 | 3.912511  | -1.428538 | 18.133223 |
| 6 | 2.678539  | 3.194790  | 16.878376 |
| 6 | 1.427500  | 3.917078  | 16.878376 |
| 6 | -1.427500 | 3.917078  | 16.878376 |
| 6 | -2.678539 | 3.194790  | 16.878376 |
| 6 | -4.106039 | 0.722288  | 16.878376 |
| 6 | -4.106039 | -0.722288 | 16.878376 |
| 6 | -2.678539 | -3.194790 | 16.878376 |
| 6 | -1.427500 | -3.917078 | 16.878376 |
| 6 | 1.427500  | -3.917078 | 16.878376 |
| 6 | 2.678539  | -3.194790 | 16.878376 |
| 6 | 4.106039  | -0.722288 | 16.878376 |
| 6 | 4.106039  | 0.722288  | 16.878376 |
| 6 | 0.725155  | 4.109327  | 15.632100 |
| 6 | -0.725155 | 4.109327  | 15.632100 |
| 6 | -3.196204 | 2.682666  | 15.632100 |



|   |           |           |           |
|---|-----------|-----------|-----------|
| 6 | -3.921359 | 1.426661  | 15.632100 |
| 6 | -3.921359 | -1.426661 | 15.632100 |
| 6 | -3.196204 | -2.682666 | 15.632100 |
| 6 | -0.725155 | -4.109327 | 15.632100 |
| 6 | 0.725155  | -4.109327 | 15.632100 |
| 6 | 3.196204  | -2.682666 | 15.632100 |
| 6 | 3.921359  | -1.426661 | 15.632100 |
| 6 | 3.921359  | 1.426661  | 15.632100 |
| 6 | 3.196204  | 2.682666  | 15.632100 |
| 6 | -1.427884 | 3.913820  | 14.382441 |
| 6 | -2.675526 | 3.193494  | 14.382441 |
| 6 | -4.103410 | 0.720326  | 14.382441 |
| 6 | -4.103410 | -0.720326 | 14.382441 |
| 6 | -2.675526 | -3.193494 | 14.382441 |
| 6 | -1.427884 | -3.913820 | 14.382441 |
| 6 | 1.427884  | -3.913820 | 14.382441 |
| 6 | 2.675526  | -3.193494 | 14.382441 |
| 6 | 4.103410  | -0.720326 | 14.382441 |
| 6 | 4.103410  | 0.720326  | 14.382441 |
| 6 | 2.675526  | 3.193494  | 14.382441 |
| 6 | 1.427884  | 3.913820  | 14.382441 |
| 6 | -3.193874 | 2.676849  | 13.127528 |
| 6 | -3.915156 | 1.427551  | 13.127528 |
| 6 | -3.915156 | -1.427551 | 13.127528 |
| 6 | -3.193874 | -2.676849 | 13.127528 |
| 6 | -0.721283 | -4.104400 | 13.127528 |
| 6 | 0.721283  | -4.104400 | 13.127528 |
| 6 | 3.193874  | -2.676849 | 13.127528 |
| 6 | 3.915156  | -1.427551 | 13.127528 |
| 6 | 3.915156  | 1.427551  | 13.127528 |
| 6 | 3.193874  | 2.676849  | 13.127528 |
| 6 | 0.721283  | 4.104400  | 13.127528 |
| 6 | -0.721283 | 4.104400  | 13.127528 |
| 6 | -4.108878 | 0.724918  | 11.879552 |
| 6 | -4.108878 | -0.724918 | 11.879552 |
| 6 | -2.682236 | -3.195933 | 11.879552 |
| 6 | -1.426641 | -3.920852 | 11.879552 |
| 6 | 1.426641  | -3.920852 | 11.879552 |
| 6 | 2.682236  | -3.195933 | 11.879552 |
| 6 | 4.108878  | -0.724918 | 11.879552 |
| 6 | 4.108878  | 0.724918  | 11.879552 |
| 6 | 2.682236  | 3.195933  | 11.879552 |
| 6 | 1.426641  | 3.920852  | 11.879552 |
| 6 | -1.426641 | 3.920852  | 11.879552 |
| 6 | -2.682236 | 3.195933  | 11.879552 |
| 6 | -3.915255 | -1.427627 | 10.631256 |
| 6 | -3.193989 | -2.676897 | 10.631256 |
| 6 | -0.721266 | -4.104524 | 10.631256 |
| 6 | 0.721266  | -4.104524 | 10.631256 |
| 6 | 3.193989  | -2.676897 | 10.631256 |
| 6 | 3.915255  | -1.427627 | 10.631256 |
| 6 | 3.915255  | 1.427627  | 10.631256 |
| 6 | 3.193989  | 2.676897  | 10.631256 |
| 6 | 0.721266  | 4.104524  | 10.631256 |
| 6 | -0.721266 | 4.104524  | 10.631256 |
| 6 | -3.193989 | 2.676897  | 10.631256 |
| 6 | -3.915255 | 1.427627  | 10.631256 |
| 6 | -2.676014 | -3.193625 | 9.376732  |
| 6 | -1.427754 | -3.914308 | 9.376732  |
| 6 | 1.427754  | -3.914308 | 9.376732  |
| 6 | 2.676014  | -3.193625 | 9.376732  |
| 6 | 4.103767  | -0.720683 | 9.376732  |
| 6 | 4.103767  | 0.720683  | 9.376732  |
| 6 | 2.676014  | 3.193625  | 9.376732  |
| 6 | 1.427754  | 3.914308  | 9.376732  |
| 6 | -1.427754 | 3.914308  | 9.376732  |
| 6 | -2.676014 | 3.193625  | 9.376732  |
| 6 | -4.103767 | 0.720683  | 9.376732  |
| 6 | -4.103767 | -0.720683 | 9.376732  |
| 6 | -0.724594 | -4.108515 | 8.127312  |

|   |           |           |          |
|---|-----------|-----------|----------|
| 6 | 0.724594  | -4.108515 | 8.127312 |
| 6 | 3.195781  | -2.681775 | 8.127312 |
| 6 | 3.920376  | -1.426741 | 8.127312 |
| 6 | 3.920376  | 1.426741  | 8.127312 |
| 6 | 3.195781  | 2.681775  | 8.127312 |
| 6 | 0.724594  | 4.108515  | 8.127312 |
| 6 | -0.724594 | 4.108515  | 8.127312 |
| 6 | -3.195781 | 2.681775  | 8.127312 |
| 6 | -3.920376 | 1.426741  | 8.127312 |
| 6 | -3.920376 | -1.426741 | 8.127312 |
| 6 | -3.195781 | -2.681775 | 8.127312 |
| 6 | 1.427404  | -3.916544 | 6.879885 |
| 6 | 2.678124  | -3.194440 | 6.879885 |
| 6 | 4.105528  | -0.722104 | 6.879885 |
| 6 | 4.105528  | 0.722104  | 6.879885 |
| 6 | 2.678124  | 3.194440  | 6.879885 |
| 6 | 1.427404  | 3.916544  | 6.879885 |
| 6 | -1.427404 | 3.916544  | 6.879885 |
| 6 | -2.678124 | 3.194440  | 6.879885 |
| 6 | -4.105528 | 0.722104  | 6.879885 |
| 6 | -4.105528 | -0.722104 | 6.879885 |
| 6 | -2.678124 | -3.194440 | 6.879885 |
| 6 | -1.427404 | -3.916544 | 6.879885 |
| 6 | 3.193442  | -2.675464 | 5.626008 |
| 6 | 3.913741  | -1.427869 | 5.626008 |
| 6 | 3.913741  | 1.427869  | 5.626008 |
| 6 | 3.193442  | 2.675464  | 5.626008 |
| 6 | 0.720299  | 4.103334  | 5.626008 |
| 6 | -0.720299 | 4.103334  | 5.626008 |
| 6 | -3.193442 | 2.675464  | 5.626008 |
| 6 | -3.913741 | 1.427869  | 5.626008 |
| 6 | -3.913741 | -1.427869 | 5.626008 |
| 6 | -3.193442 | -2.675464 | 5.626008 |
| 6 | -0.720299 | -4.103334 | 5.626008 |
| 6 | 0.720299  | -4.103334 | 5.626008 |
| 6 | 4.107961  | -0.724132 | 4.375262 |
| 6 | 4.107961  | 0.724132  | 4.375262 |
| 6 | 2.681097  | 3.195532  | 4.375262 |
| 6 | 1.426863  | 3.919664  | 4.375262 |
| 6 | -1.426863 | 3.919664  | 4.375262 |
| 6 | -2.681097 | 3.195532  | 4.375262 |
| 6 | -4.107961 | 0.724132  | 4.375262 |
| 6 | -4.107961 | -0.724132 | 4.375262 |
| 6 | -2.681097 | -3.195532 | 4.375262 |
| 6 | -1.426863 | -3.919664 | 4.375262 |
| 6 | 1.426863  | -3.919664 | 4.375262 |
| 6 | 2.681097  | -3.195532 | 4.375262 |
| 6 | 3.917705  | 1.427194  | 3.128336 |
| 6 | 3.194839  | 2.679235  | 3.128336 |
| 6 | 0.722866  | 4.106429  | 3.128336 |
| 6 | -0.722866 | 4.106429  | 3.128336 |
| 6 | -3.194839 | 2.679235  | 3.128336 |
| 6 | -3.917705 | 1.427194  | 3.128336 |
| 6 | -3.917705 | -1.427194 | 3.128336 |
| 6 | -3.194839 | -2.679235 | 3.128336 |
| 6 | -0.722866 | -4.106429 | 3.128336 |
| 6 | 0.722866  | -4.106429 | 3.128336 |
| 6 | 3.194839  | -2.679235 | 3.128336 |
| 6 | 3.917705  | -1.427194 | 3.128336 |
| 6 | 2.675190  | 3.193347  | 1.875327 |
| 6 | 1.427925  | 3.913456  | 1.875327 |
| 6 | -1.427925 | 3.913456  | 1.875327 |
| 6 | -2.675190 | 3.193347  | 1.875327 |
| 6 | -4.103114 | 0.720109  | 1.875327 |
| 6 | -4.103114 | -0.720109 | 1.875327 |
| 6 | -2.675190 | -3.193347 | 1.875327 |
| 6 | -1.427925 | -3.913456 | 1.875327 |
| 6 | 1.427925  | -3.913456 | 1.875327 |
| 6 | 2.675190  | -3.193347 | 1.875327 |
| 6 | 4.103114  | -0.720109 | 1.875327 |

|   |           |           |           |
|---|-----------|-----------|-----------|
| 6 | 4.103114  | 0.720109  | 1.875327  |
| 6 | 0.723551  | 4.107274  | 0.623377  |
| 6 | -0.723551 | 4.107274  | 0.623377  |
| 6 | -3.195228 | 2.680250  | 0.623377  |
| 6 | -3.918779 | 1.427023  | 0.623377  |
| 6 | -3.918779 | -1.427023 | 0.623377  |
| 6 | -3.195228 | -2.680250 | 0.623377  |
| 6 | -0.723551 | -4.107274 | 0.623377  |
| 6 | 0.723551  | -4.107274 | 0.623377  |
| 6 | 3.195228  | -2.680250 | 0.623377  |
| 6 | 3.918779  | -1.427023 | 0.623377  |
| 6 | 3.918779  | 1.427023  | 0.623377  |
| 6 | 3.195228  | 2.680250  | 0.623377  |
| 6 | -1.427023 | 3.918779  | -0.623377 |
| 6 | -2.680250 | 3.195228  | -0.623377 |
| 6 | -4.107274 | 0.723551  | -0.623377 |
| 6 | -4.107274 | -0.723551 | -0.623377 |
| 6 | -2.680250 | -3.195228 | -0.623377 |
| 6 | -1.427023 | -3.918779 | -0.623377 |
| 6 | 1.427023  | -3.918779 | -0.623377 |
| 6 | 2.680250  | -3.195228 | -0.623377 |
| 6 | 4.107274  | -0.723551 | -0.623377 |
| 6 | 4.107274  | 0.723551  | -0.623377 |
| 6 | 2.680250  | 3.195228  | -0.623377 |
| 6 | 1.427023  | 3.918779  | -0.623377 |
| 6 | -3.193347 | 2.675190  | -1.875327 |
| 6 | -3.913456 | 1.427925  | -1.875327 |
| 6 | -3.913456 | -1.427925 | -1.875327 |
| 6 | -3.193347 | -2.675190 | -1.875327 |
| 6 | -0.720109 | -4.103114 | -1.875327 |
| 6 | 0.720109  | -4.103114 | -1.875327 |
| 6 | 3.193347  | -2.675190 | -1.875327 |
| 6 | 3.913456  | -1.427925 | -1.875327 |
| 6 | 3.913456  | 1.427925  | -1.875327 |
| 6 | 3.193347  | 2.675190  | -1.875327 |
| 6 | 0.720109  | 4.103114  | -1.875327 |
| 6 | -0.720109 | 4.103114  | -1.875327 |
| 6 | -4.106429 | 0.722866  | -3.128336 |
| 6 | -4.106429 | -0.722866 | -3.128336 |
| 6 | -2.679235 | -3.194839 | -3.128336 |
| 6 | -1.427194 | -3.917705 | -3.128336 |
| 6 | 1.427194  | -3.917705 | -3.128336 |
| 6 | 2.679235  | -3.194839 | -3.128336 |
| 6 | 4.106429  | -0.722866 | -3.128336 |
| 6 | 4.106429  | 0.722866  | -3.128336 |
| 6 | 2.679235  | 3.194839  | -3.128336 |
| 6 | 1.427194  | 3.917705  | -3.128336 |
| 6 | -1.427194 | 3.917705  | -3.128336 |
| 6 | -2.679235 | 3.194839  | -3.128336 |
| 6 | -3.919664 | -1.426863 | -4.375262 |
| 6 | -3.195532 | -2.681097 | -4.375262 |
| 6 | -0.724132 | -4.107961 | -4.375262 |
| 6 | 0.724132  | -4.107961 | -4.375262 |
| 6 | 3.195532  | -2.681097 | -4.375262 |
| 6 | 3.919664  | -1.426863 | -4.375262 |
| 6 | 3.919664  | 1.426863  | -4.375262 |
| 6 | 3.195532  | 2.681097  | -4.375262 |
| 6 | 0.724132  | 4.107961  | -4.375262 |
| 6 | -0.724132 | 4.107961  | -4.375262 |
| 6 | -3.195532 | 2.681097  | -4.375262 |
| 6 | -3.919664 | 1.426863  | -4.375262 |
| 6 | -2.675464 | -3.193442 | -5.626008 |
| 6 | -1.427869 | -3.913741 | -5.626008 |
| 6 | 1.427869  | -3.913741 | -5.626008 |
| 6 | 2.675464  | -3.193442 | -5.626008 |
| 6 | 4.103334  | -0.720299 | -5.626008 |
| 6 | 4.103334  | 0.720299  | -5.626008 |
| 6 | 2.675464  | 3.193442  | -5.626008 |
| 6 | 1.427869  | 3.913741  | -5.626008 |
| 6 | -1.427869 | 3.913741  | -5.626008 |

|   |           |           |            |
|---|-----------|-----------|------------|
| 6 | -2.675464 | 3.193442  | -5.626008  |
| 6 | -4.103334 | 0.720299  | -5.626008  |
| 6 | -4.103334 | -0.720299 | -5.626008  |
| 6 | -0.722104 | -4.105528 | -6.879885  |
| 6 | 0.722104  | -4.105528 | -6.879885  |
| 6 | 3.194440  | -2.678124 | -6.879885  |
| 6 | 3.916544  | -1.427404 | -6.879885  |
| 6 | 3.916544  | 1.427404  | -6.879885  |
| 6 | 3.194440  | 2.678124  | -6.879885  |
| 6 | 0.722104  | 4.105528  | -6.879885  |
| 6 | -0.722104 | 4.105528  | -6.879885  |
| 6 | -3.194440 | 2.678124  | -6.879885  |
| 6 | -3.916544 | 1.427404  | -6.879885  |
| 6 | -3.916544 | -1.427404 | -6.879885  |
| 6 | -3.194440 | -2.678124 | -6.879885  |
| 6 | 1.426741  | -3.920376 | -8.127312  |
| 6 | 2.681775  | -3.195781 | -8.127312  |
| 6 | 4.108515  | -0.724594 | -8.127312  |
| 6 | 4.108515  | 0.724594  | -8.127312  |
| 6 | 2.681775  | 3.195781  | -8.127312  |
| 6 | 1.426741  | 3.920376  | -8.127312  |
| 6 | -1.426741 | 3.920376  | -8.127312  |
| 6 | -2.681775 | 3.195781  | -8.127312  |
| 6 | -4.108515 | 0.724594  | -8.127312  |
| 6 | -4.108515 | -0.724594 | -8.127312  |
| 6 | -2.681775 | -3.195781 | -8.127312  |
| 6 | -1.426741 | -3.920376 | -8.127312  |
| 6 | 3.193625  | -2.676014 | -9.376732  |
| 6 | 3.914308  | -1.427754 | -9.376732  |
| 6 | 3.914308  | 1.427754  | -9.376732  |
| 6 | 3.193625  | 2.676014  | -9.376732  |
| 6 | 0.720683  | 4.103767  | -9.376732  |
| 6 | -0.720683 | 4.103767  | -9.376732  |
| 6 | -3.193625 | 2.676014  | -9.376732  |
| 6 | -3.914308 | 1.427754  | -9.376732  |
| 6 | -3.914308 | -1.427754 | -9.376732  |
| 6 | -3.193625 | -2.676014 | -9.376732  |
| 6 | -0.720683 | -4.103767 | -9.376732  |
| 6 | 0.720683  | -4.103767 | -9.376732  |
| 6 | 4.104524  | -0.721266 | -10.631256 |
| 6 | 4.104524  | 0.721266  | -10.631256 |
| 6 | 2.676897  | 3.193989  | -10.631256 |
| 6 | 1.427627  | 3.915255  | -10.631256 |
| 6 | -1.427627 | 3.915255  | -10.631256 |
| 6 | -2.676897 | 3.193989  | -10.631256 |
| 6 | -4.104524 | 0.721266  | -10.631256 |
| 6 | -4.104524 | -0.721266 | -10.631256 |
| 6 | -2.676897 | -3.193989 | -10.631256 |
| 6 | -1.427627 | -3.915255 | -10.631256 |
| 6 | 1.427627  | -3.915255 | -10.631256 |
| 6 | 2.676897  | -3.193989 | -10.631256 |
| 6 | 3.920852  | 1.426641  | -11.879552 |
| 6 | 3.195933  | 2.682236  | -11.879552 |
| 6 | 0.724918  | 4.108878  | -11.879552 |
| 6 | -0.724918 | 4.108878  | -11.879552 |
| 6 | -3.195933 | 2.682236  | -11.879552 |
| 6 | -3.920852 | 1.426641  | -11.879552 |
| 6 | -3.920852 | -1.426641 | -11.879552 |
| 6 | -3.195933 | -2.682236 | -11.879552 |
| 6 | -0.724918 | -4.108878 | -11.879552 |
| 6 | 0.724918  | -4.108878 | -11.879552 |
| 6 | 3.195933  | -2.682236 | -11.879552 |
| 6 | 3.920852  | -1.426641 | -11.879552 |
| 6 | 2.676849  | 3.193874  | -13.127528 |
| 6 | 1.427551  | 3.915156  | -13.127528 |
| 6 | -1.427551 | 3.915156  | -13.127528 |
| 6 | -2.676849 | 3.193874  | -13.127528 |
| 6 | -4.104400 | 0.721283  | -13.127528 |
| 6 | -4.104400 | -0.721283 | -13.127528 |
| 6 | -2.676849 | -3.193874 | -13.127528 |

|   |           |           |            |
|---|-----------|-----------|------------|
| 6 | -1.427551 | -3.915156 | -13.127528 |
| 6 | 1.427551  | -3.915156 | -13.127528 |
| 6 | 2.676849  | -3.193874 | -13.127528 |
| 6 | 4.104400  | -0.721283 | -13.127528 |
| 6 | 4.104400  | 0.721283  | -13.127528 |
| 6 | 0.720326  | 4.103410  | -14.382441 |
| 6 | -0.720326 | 4.103410  | -14.382441 |
| 6 | -3.193494 | 2.675526  | -14.382441 |
| 6 | -3.913820 | 1.427884  | -14.382441 |
| 6 | -3.913820 | -1.427884 | -14.382441 |
| 6 | -3.193494 | -2.675526 | -14.382441 |
| 6 | -0.720326 | -4.103410 | -14.382441 |
| 6 | 0.720326  | -4.103410 | -14.382441 |
| 6 | 3.193494  | -2.675526 | -14.382441 |
| 6 | 3.913820  | -1.427884 | -14.382441 |
| 6 | 3.913820  | 1.427884  | -14.382441 |
| 6 | 3.193494  | 2.675526  | -14.382441 |
| 6 | -1.426661 | 3.921359  | -15.632100 |
| 6 | -2.682666 | 3.196204  | -15.632100 |
| 6 | -4.109327 | 0.725155  | -15.632100 |
| 6 | -4.109327 | -0.725155 | -15.632100 |
| 6 | -2.682666 | -3.196204 | -15.632100 |
| 6 | -1.426661 | -3.921359 | -15.632100 |
| 6 | 1.426661  | -3.921359 | -15.632100 |
| 6 | 2.682666  | -3.196204 | -15.632100 |
| 6 | 4.109327  | -0.725155 | -15.632100 |
| 6 | 4.109327  | 0.725155  | -15.632100 |
| 6 | 2.682666  | 3.196204  | -15.632100 |
| 6 | 1.426661  | 3.921359  | -15.632100 |
| 6 | -3.194790 | 2.678539  | -16.878376 |
| 6 | -3.917078 | 1.427500  | -16.878376 |
| 6 | -3.917078 | -1.427500 | -16.878376 |
| 6 | -3.194790 | -2.678539 | -16.878376 |
| 6 | -0.722288 | -4.106039 | -16.878376 |
| 6 | 0.722288  | -4.106039 | -16.878376 |
| 6 | 3.194790  | -2.678539 | -16.878376 |
| 6 | 3.917078  | -1.427500 | -16.878376 |
| 6 | 3.917078  | 1.427500  | -16.878376 |
| 6 | 3.194790  | 2.678539  | -16.878376 |
| 6 | 0.722288  | 4.106039  | -16.878376 |
| 6 | -0.722288 | 4.106039  | -16.878376 |
| 6 | -4.102603 | 0.719105  | -18.133223 |
| 6 | -4.102603 | -0.719105 | -18.133223 |
| 6 | -2.674065 | -3.193406 | -18.133223 |
| 6 | -1.428538 | -3.912511 | -18.133223 |
| 6 | 1.428538  | -3.912511 | -18.133223 |
| 6 | 2.674065  | -3.193406 | -18.133223 |
| 6 | 4.102603  | -0.719105 | -18.133223 |
| 6 | 4.102603  | 0.719105  | -18.133223 |
| 6 | 2.674065  | 3.193406  | -18.133223 |
| 6 | 1.428538  | 3.912511  | -18.133223 |
| 6 | -1.428538 | 3.912511  | -18.133223 |
| 6 | -2.674065 | 3.193406  | -18.133223 |
| 6 | -3.920421 | -1.426255 | -19.385158 |
| 6 | -3.195384 | -2.682057 | -19.385158 |
| 6 | -0.725037 | -4.108312 | -19.385158 |
| 6 | 0.725037  | -4.108312 | -19.385158 |
| 6 | 3.195384  | -2.682057 | -19.385158 |
| 6 | 3.920421  | -1.426255 | -19.385158 |
| 6 | 3.920421  | 1.426255  | -19.385158 |
| 6 | 3.195384  | 2.682057  | -19.385158 |
| 6 | 0.725037  | 4.108312  | -19.385158 |
| 6 | -0.725037 | 4.108312  | -19.385158 |
| 6 | -3.195384 | 2.682057  | -19.385158 |
| 6 | -3.920421 | 1.426255  | -19.385158 |
| 6 | -2.677227 | -3.190870 | -20.628995 |
| 6 | -1.424761 | -3.913982 | -20.628995 |
| 6 | 1.424761  | -3.913982 | -20.628995 |
| 6 | 2.677227  | -3.190870 | -20.628995 |
| 6 | 4.101988  | -0.723111 | -20.628995 |

|   |           |           |            |
|---|-----------|-----------|------------|
| 6 | 4.101988  | 0.723111  | -20.628995 |
| 6 | 2.677227  | 3.190870  | -20.628995 |
| 6 | 1.424761  | 3.913982  | -20.628995 |
| 6 | -1.424761 | 3.913982  | -20.628995 |
| 6 | -2.677227 | 3.190870  | -20.628995 |
| 6 | -4.101988 | 0.723111  | -20.628995 |
| 6 | -4.101988 | -0.723111 | -20.628995 |
| 6 | -0.715002 | -4.086619 | -21.883505 |
| 6 | 0.715002  | -4.086619 | -21.883505 |
| 6 | 3.181615  | -2.662519 | -21.883505 |
| 6 | 3.896616  | -1.424100 | -21.883505 |
| 6 | 3.896616  | 1.424100  | -21.883505 |
| 6 | 3.181615  | 2.662519  | -21.883505 |
| 6 | 0.715002  | 4.086619  | -21.883505 |
| 6 | -0.715002 | 4.086619  | -21.883505 |
| 6 | -3.181615 | 2.662519  | -21.883505 |
| 6 | -3.896616 | 1.424100  | -21.883505 |
| 6 | -3.896616 | -1.424100 | -21.883505 |
| 6 | -3.181615 | -2.662519 | -21.883505 |
| 6 | 1.420073  | -3.912014 | -23.144225 |
| 6 | 2.677867  | -3.185827 | -23.144225 |
| 6 | 4.097940  | -0.726187 | -23.144225 |
| 6 | 4.097940  | 0.726187  | -23.144225 |
| 6 | 2.677867  | 3.185827  | -23.144225 |
| 6 | 1.420073  | 3.912014  | -23.144225 |
| 6 | -1.420073 | 3.912014  | -23.144225 |
| 6 | -2.677867 | 3.185827  | -23.144225 |
| 6 | -4.097940 | 0.726187  | -23.144225 |
| 6 | -4.097940 | -0.726187 | -23.144225 |
| 6 | -2.677867 | -3.185827 | -23.144225 |
| 6 | -1.420073 | -3.912014 | -23.144225 |
| 6 | 3.223558  | -2.708823 | -24.384605 |
| 6 | 3.957688  | -1.437271 | -24.384605 |
| 6 | 3.957688  | 1.437271  | -24.384605 |
| 6 | 3.223558  | 2.708823  | -24.384605 |
| 6 | 0.734131  | 4.146094  | -24.384605 |
| 6 | -0.734131 | 4.146094  | -24.384605 |
| 6 | -3.223558 | 2.708823  | -24.384605 |
| 6 | -3.957688 | 1.437271  | -24.384605 |
| 6 | -3.957688 | -1.437271 | -24.384605 |
| 6 | -3.223558 | -2.708823 | -24.384605 |
| 6 | -0.734131 | -4.146094 | -24.384605 |
| 6 | 0.734131  | -4.146094 | -24.384605 |
| 6 | 4.211830  | -0.691519 | -25.600979 |
| 6 | 4.211830  | 0.691519  | -25.600979 |
| 6 | 2.704788  | 3.301792  | -25.600979 |
| 6 | 1.507042  | 3.993311  | -25.600979 |
| 6 | -1.507042 | 3.993311  | -25.600979 |
| 6 | -2.704788 | 3.301792  | -25.600979 |
| 6 | -4.211830 | 0.691519  | -25.600979 |
| 6 | -4.211830 | -0.691519 | -25.600979 |
| 6 | -2.704788 | -3.301792 | -25.600979 |
| 6 | -1.507042 | -3.993311 | -25.600979 |
| 6 | 1.507042  | -3.993311 | -25.600979 |
| 6 | 2.704788  | -3.301792 | -25.600979 |
| 1 | -4.318227 | -1.076184 | 26.556895  |
| 1 | -3.091116 | -3.201602 | 26.556895  |
| 1 | -1.227111 | -4.277786 | 26.556895  |
| 1 | 1.227111  | -4.277786 | 26.556895  |
| 1 | 3.091116  | -3.201602 | 26.556895  |
| 1 | 4.318227  | -1.076184 | 26.556895  |
| 1 | 4.318227  | 1.076184  | 26.556895  |
| 1 | 3.091116  | 3.201602  | 26.556895  |
| 1 | 1.227111  | 4.277786  | 26.556895  |
| 1 | -1.227111 | 4.277786  | 26.556895  |
| 1 | -3.091116 | 3.201602  | 26.556895  |
| 1 | -4.318227 | 1.076184  | 26.556895  |
| 1 | 4.277786  | -1.227111 | -26.556895 |
| 1 | 4.277786  | 1.227111  | -26.556895 |
| 1 | 3.201602  | 3.091116  | -26.556895 |

|   |           |           |            |
|---|-----------|-----------|------------|
| 1 | 1.076184  | 4.318227  | -26.556895 |
| 1 | -1.076184 | 4.318227  | -26.556895 |
| 1 | -3.201602 | 3.091116  | -26.556895 |
| 1 | -4.277786 | 1.227111  | -26.556895 |
| 1 | -4.277786 | -1.227111 | -26.556895 |
| 1 | -3.201602 | -3.091116 | -26.556895 |
| 1 | -1.076184 | -4.318227 | -26.556895 |
| 1 | 1.076184  | -4.318227 | -26.556895 |
| 1 | 3.201602  | -3.091116 | -26.556895 |

Nanotube (6,6) u21v6s  
B3LYP/STO-3G Energy: -19440.307393

|   |           |           |           |
|---|-----------|-----------|-----------|
| 6 | -4.215160 | 0.693384  | 26.209083 |
| 6 | -4.215160 | -0.693384 | 26.209083 |
| 6 | -2.708068 | -3.303743 | 26.209083 |
| 6 | -1.507092 | -3.997127 | 26.209083 |
| 6 | 1.507092  | -3.997127 | 26.209083 |
| 6 | 2.708068  | -3.303743 | 26.209083 |
| 6 | 4.215160  | -0.693384 | 26.209083 |
| 6 | 4.215160  | 0.693384  | 26.209083 |
| 6 | 2.708068  | 3.303743  | 26.209083 |
| 6 | 1.507092  | 3.997127  | 26.209083 |
| 6 | -1.507092 | 3.997127  | 26.209083 |
| 6 | -2.708068 | 3.303743  | 26.209083 |
| 6 | -3.963798 | -1.437268 | 24.996510 |
| 6 | -3.226610 | -2.714116 | 24.996510 |
| 6 | -0.737188 | -4.151384 | 24.996510 |
| 6 | 0.737188  | -4.151384 | 24.996510 |
| 6 | 3.226610  | -2.714116 | 24.996510 |
| 6 | 3.963798  | -1.437268 | 24.996510 |
| 6 | 3.963798  | 1.437268  | 24.996510 |
| 6 | 3.226610  | 2.714116  | 24.996510 |
| 6 | 0.737188  | 4.151384  | 24.996510 |
| 6 | -0.737188 | 4.151384  | 24.996510 |
| 6 | -3.226610 | 2.714116  | 24.996510 |
| 6 | -3.963798 | 1.437268  | 24.996510 |
| 6 | -2.677143 | -3.186187 | 23.756416 |
| 6 | -1.420747 | -3.911567 | 23.756416 |
| 6 | 1.420747  | -3.911567 | 23.756416 |
| 6 | 2.677143  | -3.186187 | 23.756416 |
| 6 | 4.097890  | -0.725380 | 23.756416 |
| 6 | 4.097890  | 0.725380  | 23.756416 |
| 6 | 2.677143  | 3.186187  | 23.756416 |
| 6 | 1.420747  | 3.911567  | 23.756416 |
| 6 | -1.420747 | 3.911567  | 23.756416 |
| 6 | -2.677143 | 3.186187  | 23.756416 |
| 6 | -4.097890 | 0.725380  | 23.756416 |
| 6 | -4.097890 | -0.725380 | 23.756416 |
| 6 | -0.716205 | -4.089044 | 22.493527 |
| 6 | 0.716205  | -4.089044 | 22.493527 |
| 6 | 3.183113  | -2.664774 | 22.493527 |
| 6 | 3.899319  | -1.424270 | 22.493527 |
| 6 | 3.899319  | 1.424270  | 22.493527 |
| 6 | 3.183113  | 2.664774  | 22.493527 |
| 6 | 0.716205  | 4.089044  | 22.493527 |
| 6 | -0.716205 | 4.089044  | 22.493527 |
| 6 | -3.183113 | 2.664774  | 22.493527 |
| 6 | -3.899319 | 1.424270  | 22.493527 |
| 6 | -3.899319 | -1.424270 | 22.493527 |
| 6 | -3.183113 | -2.664774 | 22.493527 |
| 6 | 1.424540  | -3.919499 | 21.243038 |
| 6 | 2.682116  | -3.193438 | 21.243038 |
| 6 | 4.106656  | -0.726061 | 21.243038 |
| 6 | 4.106656  | 0.726061  | 21.243038 |
| 6 | 2.682116  | 3.193438  | 21.243038 |
| 6 | 1.424540  | 3.919499  | 21.243038 |
| 6 | -1.424540 | 3.919499  | 21.243038 |

|   |           |           |           |
|---|-----------|-----------|-----------|
| 6 | -2.682116 | 3.193438  | 21.243038 |
| 6 | -4.106656 | 0.726061  | 21.243038 |
| 6 | -4.106656 | -0.726061 | 21.243038 |
| 6 | -2.682116 | -3.193438 | 21.243038 |
| 6 | -1.424540 | -3.919499 | 21.243038 |
| 6 | 3.195811  | -2.681248 | 20.000049 |
| 6 | 3.919934  | -1.427030 | 20.000049 |
| 6 | 3.919934  | 1.427030  | 20.000049 |
| 6 | 3.195811  | 2.681248  | 20.000049 |
| 6 | 0.724123  | 4.108278  | 20.000049 |
| 6 | -0.724123 | 4.108278  | 20.000049 |
| 6 | -3.195811 | 2.681248  | 20.000049 |
| 6 | -3.919934 | 1.427030  | 20.000049 |
| 6 | -3.919934 | -1.427030 | 20.000049 |
| 6 | -3.195811 | -2.681248 | 20.000049 |
| 6 | -0.724123 | -4.108278 | 20.000049 |
| 6 | 0.724123  | -4.108278 | 20.000049 |
| 6 | 4.104628  | -0.719904 | 18.745202 |
| 6 | 4.104628  | 0.719904  | 18.745202 |
| 6 | 2.675770  | 3.194760  | 18.745202 |
| 6 | 1.428858  | 3.914664  | 18.745202 |
| 6 | -1.428858 | 3.914664  | 18.745202 |
| 6 | -2.675770 | 3.194760  | 18.745202 |
| 6 | -4.104628 | 0.719904  | 18.745202 |
| 6 | -4.104628 | -0.719904 | 18.745202 |
| 6 | -2.675770 | -3.194760 | 18.745202 |
| 6 | -1.428858 | -3.914664 | 18.745202 |
| 6 | 1.428858  | -3.914664 | 18.745202 |
| 6 | 2.675770  | -3.194760 | 18.745202 |
| 6 | 3.923229  | 1.427142  | 17.494270 |
| 6 | 3.197556  | 2.684044  | 17.494270 |
| 6 | 0.725673  | 4.111187  | 17.494270 |
| 6 | -0.725673 | 4.111187  | 17.494270 |
| 6 | -3.197556 | 2.684044  | 17.494270 |
| 6 | -3.923229 | 1.427142  | 17.494270 |
| 6 | -3.923229 | -1.427142 | 17.494270 |
| 6 | -3.197556 | -2.684044 | 17.494270 |
| 6 | -0.725673 | -4.111187 | 17.494270 |
| 6 | 0.725673  | -4.111187 | 17.494270 |
| 6 | 3.197556  | -2.684044 | 17.494270 |
| 6 | 3.923229  | -1.427142 | 17.494270 |
| 6 | 2.681930  | 3.196620  | 16.249723 |
| 6 | 1.427389  | 3.920929  | 16.249723 |
| 6 | -1.427389 | 3.920929  | 16.249723 |
| 6 | -2.681930 | 3.196620  | 16.249723 |
| 6 | -4.109319 | 0.724310  | 16.249723 |
| 6 | -4.109319 | -0.724310 | 16.249723 |
| 6 | -2.681930 | -3.196620 | 16.249723 |
| 6 | -1.427389 | -3.920929 | 16.249723 |
| 6 | 1.427389  | -3.920929 | 16.249723 |
| 6 | 2.681930  | -3.196620 | 16.249723 |
| 6 | 4.109319  | -0.724310 | 16.249723 |
| 6 | 4.109319  | 0.724310  | 16.249723 |
| 6 | 0.720617  | 4.104735  | 14.996371 |
| 6 | -0.720617 | 4.104735  | 14.996371 |
| 6 | -3.194496 | 2.676440  | 14.996371 |
| 6 | -3.915113 | 1.428295  | 14.996371 |
| 6 | -3.915113 | -1.428295 | 14.996371 |
| 6 | -3.194496 | -2.676440 | 14.996371 |
| 6 | -0.720617 | -4.104735 | 14.996371 |
| 6 | 0.720617  | -4.104735 | 14.996371 |
| 6 | 3.194496  | -2.676440 | 14.996371 |
| 6 | 3.915113  | -1.428295 | 14.996371 |
| 6 | 3.915113  | 1.428295  | 14.996371 |
| 6 | 3.194496  | 2.676440  | 14.996371 |
| 6 | -1.427048 | 3.921955  | 13.745157 |
| 6 | -2.682989 | 3.196838  | 13.745157 |
| 6 | -4.110037 | 0.725117  | 13.745157 |
| 6 | -4.110037 | -0.725117 | 13.745157 |
| 6 | -2.682989 | -3.196838 | 13.745157 |



|   |           |           |           |
|---|-----------|-----------|-----------|
| 6 | -1.427048 | -3.921955 | 13.745157 |
| 6 | 1.427048  | -3.921955 | 13.745157 |
| 6 | 2.682989  | -3.196838 | 13.745157 |
| 6 | 4.110037  | -0.725117 | 13.745157 |
| 6 | 4.110037  | 0.725117  | 13.745157 |
| 6 | 2.682989  | 3.196838  | 13.745157 |
| 6 | 1.427048  | 3.921955  | 13.745157 |
| 6 | -3.196446 | 2.681812  | 12.499883 |
| 6 | -3.920740 | 1.427298  | 12.499883 |
| 6 | -3.920740 | -1.427298 | 12.499883 |
| 6 | -3.196446 | -2.681812 | 12.499883 |
| 6 | -0.724294 | -4.109110 | 12.499883 |
| 6 | 0.724294  | -4.109110 | 12.499883 |
| 6 | 3.196446  | -2.681812 | 12.499883 |
| 6 | 3.920740  | -1.427298 | 12.499883 |
| 6 | 3.920740  | 1.427298  | 12.499883 |
| 6 | 3.196446  | 2.681812  | 12.499883 |
| 6 | 0.724294  | 4.109110  | 12.499883 |
| 6 | -0.724294 | 4.109110  | 12.499883 |
| 6 | -4.105127 | 0.720966  | 11.247275 |
| 6 | -4.105127 | -0.720966 | 11.247275 |
| 6 | -2.676938 | -3.194662 | 11.247275 |
| 6 | -1.428189 | -3.915627 | 11.247275 |
| 6 | 1.428189  | -3.915627 | 11.247275 |
| 6 | 2.676938  | -3.194662 | 11.247275 |
| 6 | 4.105127  | -0.720966 | 11.247275 |
| 6 | 4.105127  | 0.720966  | 11.247275 |
| 6 | 2.676938  | 3.194662  | 11.247275 |
| 6 | 1.428189  | 3.915627  | 11.247275 |
| 6 | -1.428189 | 3.915627  | 11.247275 |
| 6 | -2.676938 | 3.194662  | 11.247275 |
| 6 | -3.921591 | -1.427142 | 9.995981  |
| 6 | -3.196737 | -2.682626 | 9.995981  |
| 6 | -0.724854 | -4.109768 | 9.995981  |
| 6 | 0.724854  | -4.109768 | 9.995981  |
| 6 | 3.196737  | -2.682626 | 9.995981  |
| 6 | 3.921591  | -1.427142 | 9.995981  |
| 6 | 3.921591  | 1.427142  | 9.995981  |
| 6 | 3.196737  | 2.682626  | 9.995981  |
| 6 | 0.724854  | 4.109768  | 9.995981  |
| 6 | -0.724854 | 4.109768  | 9.995981  |
| 6 | -3.196737 | 2.682626  | 9.995981  |
| 6 | -3.921591 | 1.427142  | 9.995981  |
| 6 | -2.681868 | -3.196482 | 8.750344  |
| 6 | -1.427301 | -3.920807 | 8.750344  |
| 6 | 1.427301  | -3.920807 | 8.750344  |
| 6 | 2.681868  | -3.196482 | 8.750344  |
| 6 | 4.109169  | -0.724325 | 8.750344  |
| 6 | 4.109169  | 0.724325  | 8.750344  |
| 6 | 2.681868  | 3.196482  | 8.750344  |
| 6 | 1.427301  | 3.920807  | 8.750344  |
| 6 | -1.427301 | 3.920807  | 8.750344  |
| 6 | -2.681868 | 3.196482  | 8.750344  |
| 6 | -4.109169 | 0.724325  | 8.750344  |
| 6 | -4.109169 | -0.724325 | 8.750344  |
| 6 | -0.721138 | -4.105345 | 7.498176  |
| 6 | 0.721138  | -4.105345 | 7.498176  |
| 6 | 3.194764  | -2.677196 | 7.498176  |
| 6 | 3.915902  | -1.428149 | 7.498176  |
| 6 | 3.915902  | 1.428149  | 7.498176  |
| 6 | 3.194764  | 2.677196  | 7.498176  |
| 6 | 0.721138  | 4.105345  | 7.498176  |
| 6 | -0.721138 | 4.105345  | 7.498176  |
| 6 | -3.194764 | 2.677196  | 7.498176  |
| 6 | -3.915902 | 1.428149  | 7.498176  |
| 6 | -3.915902 | -1.428149 | 7.498176  |
| 6 | -3.194764 | -2.677196 | 7.498176  |
| 6 | 1.427204  | -3.921315 | 6.246794  |
| 6 | 2.682357  | -3.196652 | 6.246794  |
| 6 | 4.109561  | -0.724663 | 6.246794  |

|   |           |           |           |
|---|-----------|-----------|-----------|
| 6 | 4.109561  | 0.724663  | 6.246794  |
| 6 | 2.682357  | 3.196652  | 6.246794  |
| 6 | 1.427204  | 3.921315  | 6.246794  |
| 6 | -1.427204 | 3.921315  | 6.246794  |
| 6 | -2.682357 | 3.196652  | 6.246794  |
| 6 | -4.109561 | 0.724663  | 6.246794  |
| 6 | -4.109561 | -0.724663 | 6.246794  |
| 6 | -2.682357 | -3.196652 | 6.246794  |
| 6 | -1.427204 | -3.921315 | 6.246794  |
| 6 | 3.196507  | -2.681927 | 5.000961  |
| 6 | 3.920870  | -1.427293 | 5.000961  |
| 6 | 3.920870  | 1.427293  | 5.000961  |
| 6 | 3.196507  | 2.681927  | 5.000961  |
| 6 | 0.724363  | 4.109220  | 5.000961  |
| 6 | -0.724363 | 4.109220  | 5.000961  |
| 6 | -3.196507 | 2.681927  | 5.000961  |
| 6 | -3.920870 | 1.427293  | 5.000961  |
| 6 | -3.920870 | -1.427293 | 5.000961  |
| 6 | -3.196507 | -2.681927 | 5.000961  |
| 6 | -0.724363 | -4.109220 | 5.000961  |
| 6 | 0.724363  | -4.109220 | 5.000961  |
| 6 | 4.105439  | -0.721215 | 3.749088  |
| 6 | 4.105439  | 0.721215  | 3.749088  |
| 6 | 2.677310  | 3.194807  | 3.749088  |
| 6 | 1.428129  | 3.916022  | 3.749088  |
| 6 | -1.428129 | 3.916022  | 3.749088  |
| 6 | -2.677310 | 3.194807  | 3.749088  |
| 6 | -4.105439 | 0.721215  | 3.749088  |
| 6 | -4.105439 | -0.721215 | 3.749088  |
| 6 | -2.677310 | -3.194807 | 3.749088  |
| 6 | -1.428129 | -3.916022 | 3.749088  |
| 6 | 1.428129  | -3.916022 | 3.749088  |
| 6 | 2.677310  | -3.194807 | 3.749088  |
| 6 | 3.921117  | 1.427240  | 2.497583  |
| 6 | 3.196584  | 2.682167  | 2.497583  |
| 6 | 0.724533  | 4.109407  | 2.497583  |
| 6 | -0.724533 | 4.109407  | 2.497583  |
| 6 | -3.196584 | 2.682167  | 2.497583  |
| 6 | -3.921117 | 1.427240  | 2.497583  |
| 6 | -3.921117 | -1.427240 | 2.497583  |
| 6 | -3.196584 | -2.682167 | 2.497583  |
| 6 | -0.724533 | -4.109407 | 2.497583  |
| 6 | 0.724533  | -4.109407 | 2.497583  |
| 6 | 3.196584  | -2.682167 | 2.497583  |
| 6 | 3.921117  | -1.427240 | 2.497583  |
| 6 | 2.682039  | 3.196536  | 1.251661  |
| 6 | 1.427262  | 3.920982  | 1.251661  |
| 6 | -1.427262 | 3.920982  | 1.251661  |
| 6 | -2.682039 | 3.196536  | 1.251661  |
| 6 | -4.109301 | 0.724446  | 1.251661  |
| 6 | -4.109301 | -0.724446 | 1.251661  |
| 6 | -2.682039 | -3.196536 | 1.251661  |
| 6 | -1.427262 | -3.920982 | 1.251661  |
| 6 | 1.427262  | -3.920982 | 1.251661  |
| 6 | 2.682039  | -3.196536 | 1.251661  |
| 6 | 4.109301  | -0.724446 | 1.251661  |
| 6 | 4.109301  | 0.724446  | 1.251661  |
| 6 | 0.721254  | 4.105483  | 0.000000  |
| 6 | -0.721254 | 4.105483  | 0.000000  |
| 6 | -3.194826 | 2.677366  | 0.000000  |
| 6 | -3.916080 | 1.428118  | 0.000000  |
| 6 | -3.916080 | -1.428118 | 0.000000  |
| 6 | -3.194826 | -2.677366 | 0.000000  |
| 6 | -0.721254 | -4.105483 | 0.000000  |
| 6 | 0.721254  | -4.105483 | 0.000000  |
| 6 | 3.194826  | -2.677366 | 0.000000  |
| 6 | 3.916080  | -1.428118 | 0.000000  |
| 6 | 3.916080  | 1.428118  | 0.000000  |
| 6 | 3.194826  | 2.677366  | 0.000000  |
| 6 | -1.427262 | 3.920982  | -1.251661 |

|   |           |           |           |
|---|-----------|-----------|-----------|
| 6 | -2.682039 | 3.196536  | -1.251661 |
| 6 | -4.109301 | 0.724446  | -1.251661 |
| 6 | -4.109301 | -0.724446 | -1.251661 |
| 6 | -2.682039 | -3.196536 | -1.251661 |
| 6 | -1.427262 | -3.920982 | -1.251661 |
| 6 | 1.427262  | -3.920982 | -1.251661 |
| 6 | 2.682039  | -3.196536 | -1.251661 |
| 6 | 4.109301  | -0.724446 | -1.251661 |
| 6 | 4.109301  | 0.724446  | -1.251661 |
| 6 | 2.682039  | 3.196536  | -1.251661 |
| 6 | 1.427262  | 3.920982  | -1.251661 |
| 6 | -3.196584 | 2.682167  | -2.497583 |
| 6 | -3.921117 | 1.427240  | -2.497583 |
| 6 | -3.921117 | -1.427240 | -2.497583 |
| 6 | -3.196584 | -2.682167 | -2.497583 |
| 6 | -0.724533 | -4.109407 | -2.497583 |
| 6 | 0.724533  | -4.109407 | -2.497583 |
| 6 | 3.196584  | -2.682167 | -2.497583 |
| 6 | 3.921117  | -1.427240 | -2.497583 |
| 6 | 3.921117  | 1.427240  | -2.497583 |
| 6 | 3.196584  | 2.682167  | -2.497583 |
| 6 | 0.724533  | 4.109407  | -2.497583 |
| 6 | -0.724533 | 4.109407  | -2.497583 |
| 6 | -4.105439 | 0.721215  | -3.749088 |
| 6 | -4.105439 | -0.721215 | -3.749088 |
| 6 | -2.677310 | -3.194807 | -3.749088 |
| 6 | -1.428129 | -3.916022 | -3.749088 |
| 6 | 1.428129  | -3.916022 | -3.749088 |
| 6 | 2.677310  | -3.194807 | -3.749088 |
| 6 | 4.105439  | -0.721215 | -3.749088 |
| 6 | 4.105439  | 0.721215  | -3.749088 |
| 6 | 2.677310  | 3.194807  | -3.749088 |
| 6 | 1.428129  | 3.916022  | -3.749088 |
| 6 | -1.428129 | 3.916022  | -3.749088 |
| 6 | -2.677310 | 3.194807  | -3.749088 |
| 6 | -3.920870 | -1.427293 | -5.000961 |
| 6 | -3.196507 | -2.681927 | -5.000961 |
| 6 | -0.724363 | -4.109220 | -5.000961 |
| 6 | 0.724363  | -4.109220 | -5.000961 |
| 6 | 3.196507  | -2.681927 | -5.000961 |
| 6 | 3.920870  | -1.427293 | -5.000961 |
| 6 | 3.920870  | 1.427293  | -5.000961 |
| 6 | 3.196507  | 2.681927  | -5.000961 |
| 6 | 0.724363  | 4.109220  | -5.000961 |
| 6 | -0.724363 | 4.109220  | -5.000961 |
| 6 | -3.196507 | 2.681927  | -5.000961 |
| 6 | -3.920870 | 1.427293  | -5.000961 |
| 6 | -2.682357 | -3.196652 | -6.246794 |
| 6 | -1.427204 | -3.921315 | -6.246794 |
| 6 | 1.427204  | -3.921315 | -6.246794 |
| 6 | 2.682357  | -3.196652 | -6.246794 |
| 6 | 4.109561  | -0.724663 | -6.246794 |
| 6 | 4.109561  | 0.724663  | -6.246794 |
| 6 | 2.682357  | 3.196652  | -6.246794 |
| 6 | 1.427204  | 3.921315  | -6.246794 |
| 6 | -1.427204 | 3.921315  | -6.246794 |
| 6 | -2.682357 | 3.196652  | -6.246794 |
| 6 | -4.109561 | 0.724663  | -6.246794 |
| 6 | -4.109561 | -0.724663 | -6.246794 |
| 6 | -0.721138 | -4.105345 | -7.498176 |
| 6 | 0.721138  | -4.105345 | -7.498176 |
| 6 | 3.194764  | -2.677196 | -7.498176 |
| 6 | 3.915902  | -1.428149 | -7.498176 |
| 6 | 3.915902  | 1.428149  | -7.498176 |
| 6 | 3.194764  | 2.677196  | -7.498176 |
| 6 | 0.721138  | 4.105345  | -7.498176 |
| 6 | -0.721138 | 4.105345  | -7.498176 |
| 6 | -3.194764 | 2.677196  | -7.498176 |
| 6 | -3.915902 | 1.428149  | -7.498176 |
| 6 | -3.915902 | -1.428149 | -7.498176 |

|   |           |           |            |
|---|-----------|-----------|------------|
| 6 | -3.194764 | -2.677196 | -7.498176  |
| 6 | 1.427301  | -3.920807 | -8.750344  |
| 6 | 2.681868  | -3.196482 | -8.750344  |
| 6 | 4.109169  | -0.724325 | -8.750344  |
| 6 | 4.109169  | 0.724325  | -8.750344  |
| 6 | 2.681868  | 3.196482  | -8.750344  |
| 6 | 1.427301  | 3.920807  | -8.750344  |
| 6 | -1.427301 | 3.920807  | -8.750344  |
| 6 | -2.681868 | 3.196482  | -8.750344  |
| 6 | -4.109169 | 0.724325  | -8.750344  |
| 6 | -4.109169 | -0.724325 | -8.750344  |
| 6 | -2.681868 | -3.196482 | -8.750344  |
| 6 | -1.427301 | -3.920807 | -8.750344  |
| 6 | 3.196737  | -2.682626 | -9.995981  |
| 6 | 3.921591  | -1.427142 | -9.995981  |
| 6 | 3.921591  | 1.427142  | -9.995981  |
| 6 | 3.196737  | 2.682626  | -9.995981  |
| 6 | 0.724854  | 4.109768  | -9.995981  |
| 6 | -0.724854 | 4.109768  | -9.995981  |
| 6 | -3.196737 | 2.682626  | -9.995981  |
| 6 | -3.921591 | 1.427142  | -9.995981  |
| 6 | -3.921591 | -1.427142 | -9.995981  |
| 6 | -3.196737 | -2.682626 | -9.995981  |
| 6 | -0.724854 | -4.109768 | -9.995981  |
| 6 | 0.724854  | -4.109768 | -9.995981  |
| 6 | 4.105127  | -0.720966 | -11.247275 |
| 6 | 4.105127  | 0.720966  | -11.247275 |
| 6 | 2.676938  | 3.194662  | -11.247275 |
| 6 | 1.428189  | 3.915627  | -11.247275 |
| 6 | -1.428189 | 3.915627  | -11.247275 |
| 6 | -2.676938 | 3.194662  | -11.247275 |
| 6 | -4.105127 | 0.720966  | -11.247275 |
| 6 | -4.105127 | -0.720966 | -11.247275 |
| 6 | -2.676938 | -3.194662 | -11.247275 |
| 6 | -1.428189 | -3.915627 | -11.247275 |
| 6 | 1.428189  | -3.915627 | -11.247275 |
| 6 | 2.676938  | -3.194662 | -11.247275 |
| 6 | 3.920740  | 1.427298  | -12.499883 |
| 6 | 3.196446  | 2.681812  | -12.499883 |
| 6 | 0.724294  | 4.109110  | -12.499883 |
| 6 | -0.724294 | 4.109110  | -12.499883 |
| 6 | -3.196446 | 2.681812  | -12.499883 |
| 6 | -3.920740 | 1.427298  | -12.499883 |
| 6 | -3.920740 | -1.427298 | -12.499883 |
| 6 | -3.196446 | -2.681812 | -12.499883 |
| 6 | -0.724294 | -4.109110 | -12.499883 |
| 6 | 0.724294  | -4.109110 | -12.499883 |
| 6 | 3.196446  | -2.681812 | -12.499883 |
| 6 | 3.920740  | -1.427298 | -12.499883 |
| 6 | 2.682989  | 3.196838  | -13.745157 |
| 6 | 1.427048  | 3.921955  | -13.745157 |
| 6 | -1.427048 | 3.921955  | -13.745157 |
| 6 | -2.682989 | 3.196838  | -13.745157 |
| 6 | -4.110037 | 0.725117  | -13.745157 |
| 6 | -4.110037 | -0.725117 | -13.745157 |
| 6 | -2.682989 | -3.196838 | -13.745157 |
| 6 | -1.427048 | -3.921955 | -13.745157 |
| 6 | 1.427048  | -3.921955 | -13.745157 |
| 6 | 2.682989  | -3.196838 | -13.745157 |
| 6 | 4.110037  | -0.725117 | -13.745157 |
| 6 | 4.110037  | 0.725117  | -13.745157 |
| 6 | 0.720617  | 4.104735  | -14.996371 |
| 6 | -0.720617 | 4.104735  | -14.996371 |
| 6 | -3.194496 | 2.676440  | -14.996371 |
| 6 | -3.915113 | 1.428295  | -14.996371 |
| 6 | -3.915113 | -1.428295 | -14.996371 |
| 6 | -3.194496 | -2.676440 | -14.996371 |
| 6 | -0.720617 | -4.104735 | -14.996371 |
| 6 | 0.720617  | -4.104735 | -14.996371 |
| 6 | 3.194496  | -2.676440 | -14.996371 |

|   |           |           |            |
|---|-----------|-----------|------------|
| 6 | 3.915113  | -1.428295 | -14.996371 |
| 6 | 3.915113  | 1.428295  | -14.996371 |
| 6 | 3.194496  | 2.676440  | -14.996371 |
| 6 | -1.427389 | 3.920929  | -16.249723 |
| 6 | -2.681930 | 3.196620  | -16.249723 |
| 6 | -4.109319 | 0.724310  | -16.249723 |
| 6 | -4.109319 | -0.724310 | -16.249723 |
| 6 | -2.681930 | -3.196620 | -16.249723 |
| 6 | -1.427389 | -3.920929 | -16.249723 |
| 6 | 1.427389  | -3.920929 | -16.249723 |
| 6 | 2.681930  | -3.196620 | -16.249723 |
| 6 | 4.109319  | -0.724310 | -16.249723 |
| 6 | 4.109319  | 0.724310  | -16.249723 |
| 6 | 2.681930  | 3.196620  | -16.249723 |
| 6 | 1.427389  | 3.920929  | -16.249723 |
| 6 | -3.197556 | 2.684044  | -17.494270 |
| 6 | -3.923229 | 1.427142  | -17.494270 |
| 6 | -3.923229 | -1.427142 | -17.494270 |
| 6 | -3.197556 | -2.684044 | -17.494270 |
| 6 | -0.725673 | -4.111187 | -17.494270 |
| 6 | 0.725673  | -4.111187 | -17.494270 |
| 6 | 3.197556  | -2.684044 | -17.494270 |
| 6 | 3.923229  | -1.427142 | -17.494270 |
| 6 | 3.923229  | 1.427142  | -17.494270 |
| 6 | 3.197556  | 2.684044  | -17.494270 |
| 6 | 0.725673  | 4.111187  | -17.494270 |
| 6 | -0.725673 | 4.111187  | -17.494270 |
| 6 | -4.104628 | 0.719904  | -18.745202 |
| 6 | -4.104628 | -0.719904 | -18.745202 |
| 6 | -2.675770 | -3.194760 | -18.745202 |
| 6 | -1.428858 | -3.914664 | -18.745202 |
| 6 | 1.428858  | -3.914664 | -18.745202 |
| 6 | 2.675770  | -3.194760 | -18.745202 |
| 6 | 4.104628  | -0.719904 | -18.745202 |
| 6 | 4.104628  | 0.719904  | -18.745202 |
| 6 | 2.675770  | 3.194760  | -18.745202 |
| 6 | 1.428858  | 3.914664  | -18.745202 |
| 6 | -1.428858 | 3.914664  | -18.745202 |
| 6 | -2.675770 | 3.194760  | -18.745202 |
| 6 | -3.919934 | -1.427030 | -20.000049 |
| 6 | -3.195811 | -2.681248 | -20.000049 |
| 6 | -0.724123 | -4.108278 | -20.000049 |
| 6 | 0.724123  | -4.108278 | -20.000049 |
| 6 | 3.195811  | -2.681248 | -20.000049 |
| 6 | 3.919934  | -1.427030 | -20.000049 |
| 6 | 3.919934  | 1.427030  | -20.000049 |
| 6 | 3.195811  | 2.681248  | -20.000049 |
| 6 | 0.724123  | 4.108278  | -20.000049 |
| 6 | -0.724123 | 4.108278  | -20.000049 |
| 6 | -3.195811 | 2.681248  | -20.000049 |
| 6 | -3.919934 | 1.427030  | -20.000049 |
| 6 | -2.682116 | -3.193438 | -21.243038 |
| 6 | -1.424540 | -3.919499 | -21.243038 |
| 6 | 1.424540  | -3.919499 | -21.243038 |
| 6 | 2.682116  | -3.193438 | -21.243038 |
| 6 | 4.106656  | -0.726061 | -21.243038 |
| 6 | 4.106656  | 0.726061  | -21.243038 |
| 6 | 2.682116  | 3.193438  | -21.243038 |
| 6 | 1.424540  | 3.919499  | -21.243038 |
| 6 | -1.424540 | 3.919499  | -21.243038 |
| 6 | -2.682116 | 3.193438  | -21.243038 |
| 6 | -4.106656 | 0.726061  | -21.243038 |
| 6 | -4.106656 | -0.726061 | -21.243038 |
| 6 | -0.716205 | -4.089044 | -22.493527 |
| 6 | 0.716205  | -4.089044 | -22.493527 |
| 6 | 3.183113  | -2.664774 | -22.493527 |
| 6 | 3.899319  | -1.424270 | -22.493527 |
| 6 | 3.899319  | 1.424270  | -22.493527 |
| 6 | 3.183113  | 2.664774  | -22.493527 |
| 6 | 0.716205  | 4.089044  | -22.493527 |

|   |           |           |            |
|---|-----------|-----------|------------|
| 6 | -0.716205 | 4.089044  | -22.493527 |
| 6 | -3.183113 | 2.664774  | -22.493527 |
| 6 | -3.899319 | 1.424270  | -22.493527 |
| 6 | -3.899319 | -1.424270 | -22.493527 |
| 6 | -3.183113 | -2.664774 | -22.493527 |
| 6 | 1.420747  | -3.911567 | -23.756416 |
| 6 | 2.677143  | -3.186187 | -23.756416 |
| 6 | 4.097890  | -0.725380 | -23.756416 |
| 6 | 4.097890  | 0.725380  | -23.756416 |
| 6 | 2.677143  | 3.186187  | -23.756416 |
| 6 | 1.420747  | 3.911567  | -23.756416 |
| 6 | -1.420747 | 3.911567  | -23.756416 |
| 6 | -2.677143 | 3.186187  | -23.756416 |
| 6 | -4.097890 | 0.725380  | -23.756416 |
| 6 | -4.097890 | -0.725380 | -23.756416 |
| 6 | -2.677143 | -3.186187 | -23.756416 |
| 6 | -1.420747 | -3.911567 | -23.756416 |
| 6 | 3.226610  | -2.714116 | -24.996510 |
| 6 | 3.963798  | -1.437268 | -24.996510 |
| 6 | 3.963798  | 1.437268  | -24.996510 |
| 6 | 3.226610  | 2.714116  | -24.996510 |
| 6 | 0.737188  | 4.151384  | -24.996510 |
| 6 | -0.737188 | 4.151384  | -24.996510 |
| 6 | -3.226610 | 2.714116  | -24.996510 |
| 6 | -3.963798 | 1.437268  | -24.996510 |
| 6 | -3.963798 | -1.437268 | -24.996510 |
| 6 | -3.226610 | -2.714116 | -24.996510 |
| 6 | -0.737188 | -4.151384 | -24.996510 |
| 6 | 0.737188  | -4.151384 | -24.996510 |
| 6 | 4.215160  | -0.693384 | -26.209083 |
| 6 | 4.215160  | 0.693384  | -26.209083 |
| 6 | 2.708068  | 3.303743  | -26.209083 |
| 6 | 1.507092  | 3.997127  | -26.209083 |
| 6 | -1.507092 | 3.997127  | -26.209083 |
| 6 | -2.708068 | 3.303743  | -26.209083 |
| 6 | -4.215160 | 0.693384  | -26.209083 |
| 6 | -4.215160 | -0.693384 | -26.209083 |
| 6 | -2.708068 | -3.303743 | -26.209083 |
| 6 | -1.507092 | -3.997127 | -26.209083 |
| 6 | 1.507092  | -3.997127 | -26.209083 |
| 6 | 2.708068  | -3.303743 | -26.209083 |
| 1 | -4.273197 | 1.226109  | 27.166767  |
| 1 | -4.273197 | -1.226109 | 27.166767  |
| 1 | -3.198440 | -3.087642 | 27.166767  |
| 1 | -1.074757 | -4.313751 | 27.166767  |
| 1 | 1.074757  | -4.313751 | 27.166767  |
| 1 | 3.198440  | -3.087642 | 27.166767  |
| 1 | 4.273197  | -1.226109 | 27.166767  |
| 1 | 4.273197  | 1.226109  | 27.166767  |
| 1 | 3.198440  | 3.087642  | 27.166767  |
| 1 | 1.074757  | 4.313751  | 27.166767  |
| 1 | -1.074757 | 4.313751  | 27.166767  |
| 1 | -3.198440 | 3.087642  | 27.166767  |
| 1 | 4.273197  | -1.226109 | -27.166767 |
| 1 | 4.273197  | 1.226109  | -27.166767 |
| 1 | 3.198440  | 3.087642  | -27.166767 |
| 1 | 1.074757  | 4.313751  | -27.166767 |
| 1 | -1.074757 | 4.313751  | -27.166767 |
| 1 | -3.198440 | 3.087642  | -27.166767 |
| 1 | -4.273197 | 1.226109  | -27.166767 |
| 1 | -4.273197 | -1.226109 | -27.166767 |
| 1 | -3.198440 | -3.087642 | -27.166767 |
| 1 | -1.074757 | -4.313751 | -27.166767 |
| 1 | 1.074757  | -4.313751 | -27.166767 |
| 1 | 3.198440  | -3.087642 | -27.166767 |

Nanotube (6,6) u22v0s  
B3LYP/STO-3G Energy: -19892.087846

|   |              |              |               |
|---|--------------|--------------|---------------|
| C | -0.002199100 | 4.270799660  | -26.841820050 |
| C | 1.364607530  | 4.046937430  | -26.841894950 |
| C | 3.697521450  | 2.137304300  | -26.841820050 |
| C | 4.187054390  | 0.841683930  | -26.841894950 |
| C | 3.699720550  | -2.133495360 | -26.841820050 |
| C | 2.822446860  | -3.205253500 | -26.841894950 |
| C | 0.002199100  | -4.270799660 | -26.841820050 |
| C | -1.364607530 | -4.046937430 | -26.841894950 |
| C | -3.697521450 | -2.137304300 | -26.841820050 |
| C | -4.187054390 | -0.841683930 | -26.841894950 |
| C | -3.699720550 | 2.133495360  | -26.841820050 |
| C | -2.822446860 | 3.205253500  | -26.841894950 |
| C | 2.058334530  | 3.675982900  | -25.627623420 |
| C | 3.196855280  | 2.744068020  | -25.627612870 |
| C | 4.212661840  | 0.055421460  | -25.627623420 |
| C | 3.974860260  | -1.396523870 | -25.627612870 |
| C | 2.154327310  | -3.620561440 | -25.627623420 |
| C | 0.778004980  | -4.140591900 | -25.627612870 |
| C | -2.058334530 | -3.675982900 | -25.627623420 |
| C | -3.196855280 | -2.744068020 | -25.627612870 |
| C | -4.212661840 | -0.055421460 | -25.627623420 |
| C | -3.974860260 | 1.396523870  | -25.627612870 |
| C | -2.154327310 | 3.620561440  | -25.627623420 |
| C | -0.778004980 | 4.140591900  | -25.627612870 |
| C | 3.575494500  | 2.126537430  | -24.387596210 |
| C | 4.088365230  | 0.769074060  | -24.387568340 |
| C | 3.629382690  | -2.033200360 | -24.387596210 |
| C | 2.710220290  | -3.156091120 | -24.387568340 |
| C | 0.053888190  | -4.159737790 | -24.387596210 |
| C | -1.378144940 | -3.925165180 | -24.387568340 |
| C | -3.575494500 | -2.126537430 | -24.387596210 |
| C | -4.088365230 | -0.769074060 | -24.387568340 |
| C | -3.629382690 | 2.033200360  | -24.387596210 |
| C | -2.710220290 | 3.156091120  | -24.387568340 |
| C | -0.053888190 | 4.159737790  | -24.387596210 |
| C | 1.378144940  | 3.925165180  | -24.387568340 |
| C | 4.148186840  | 0.045483160  | -23.125592150 |
| C | 3.916932100  | -1.366486310 | -23.125547370 |
| C | 2.113482990  | -3.569693600 | -23.125592150 |
| C | 0.775054190  | -4.075405850 | -23.125547370 |
| C | -2.034703840 | -3.615176760 | -23.125592150 |
| C | -3.141877900 | -2.708919550 | -23.125547370 |
| C | -4.148186840 | -0.045483160 | -23.125592150 |
| C | -3.916932100 | 1.366486310  | -23.125547370 |
| C | -2.113482990 | 3.569693600  | -23.125592150 |
| C | -0.775054190 | 4.075405850  | -23.125547370 |
| C | 2.034703840  | 3.615176760  | -23.125592150 |
| C | 3.141877900  | 2.708919550  | -23.125547370 |
| C | 3.634370400  | -2.038556730 | -21.872968500 |
| C | 2.716495220  | -3.159908900 | -21.873074240 |
| C | 0.051743280  | -4.166735460 | -21.872968500 |
| C | -1.378313770 | -3.932508320 | -21.873074240 |
| C | -3.582627120 | -2.128178720 | -21.872968500 |
| C | -4.094808990 | -0.772599420 | -21.873074240 |
| C | -3.634370400 | 2.038556730  | -21.872968500 |
| C | -2.716495220 | 3.159908900  | -21.873074240 |
| C | -0.051743280 | 4.166735460  | -21.872968500 |
| C | 1.378313770  | 3.932508320  | -21.873074240 |
| C | 3.582627120  | 2.128178720  | -21.872968500 |
| C | 4.094808990  | 0.772599420  | -21.873074240 |
| C | 2.129678640  | -3.586663560 | -20.629766480 |
| C | 0.774099760  | -4.098816740 | -20.629834540 |
| C | -2.041302440 | -3.637687580 | -20.629766480 |
| C | -3.162629540 | -2.719798430 | -20.629834540 |
| C | -4.170981080 | -0.051024020 | -20.629766480 |
| C | -3.936729300 | 1.379018310  | -20.629834540 |
| C | -2.129678640 | 3.586663560  | -20.629766480 |
| C | -0.774099760 | 4.098816740  | -20.629834540 |
| C | 2.041302440  | 3.637687580  | -20.629766480 |

|   |              |              |               |
|---|--------------|--------------|---------------|
| C | 3.162629540  | 2.719798430  | -20.629834540 |
| C | 4.170981080  | 0.051024020  | -20.629766480 |
| C | 3.936729300  | -1.379018310 | -20.629834540 |
| C | 0.046551040  | -4.165667270 | -19.376134660 |
| C | -1.373136130 | -3.933111430 | -19.376169900 |
| C | -3.584298160 | -2.123148020 | -19.376134660 |
| C | -4.092742480 | -0.777384950 | -19.376169900 |
| C | -3.630849200 | 2.042519260  | -19.376134660 |
| C | -2.719606350 | 3.155726480  | -19.376169900 |
| C | -0.046551040 | 4.165667270  | -19.376134660 |
| C | 1.373136130  | 3.933111430  | -19.376169900 |
| C | 3.584298160  | 2.123148020  | -19.376134660 |
| C | 4.092742480  | 0.777384950  | -19.376169900 |
| C | 3.630849200  | -2.042519260 | -19.376134660 |
| C | 2.719606350  | -3.155726480 | -19.376169900 |
| C | -2.042440600 | -3.638554160 | -18.123147510 |
| C | -3.163309700 | -2.721055620 | -18.123078470 |
| C | -4.172300630 | -0.050471630 | -18.123147510 |
| C | -3.938158140 | 1.378978750  | -18.123078470 |
| C | -2.129860030 | 3.588082530  | -18.123147510 |
| C | -0.774848450 | 4.100034370  | -18.123078470 |
| C | 2.042440600  | 3.638554160  | -18.123147510 |
| C | 3.163309700  | 2.721055620  | -18.123078470 |
| C | 4.172300630  | 0.050471630  | -18.123147510 |
| C | 3.938158140  | -1.378978750 | -18.123078470 |
| C | 2.129860030  | -3.588082530 | -18.123147510 |
| C | 0.774848450  | -4.100034370 | -18.123078470 |
| C | -3.588162850 | -2.130634370 | -16.878206340 |
| C | -4.100603670 | -0.774321020 | -16.878155670 |
| C | -3.639264910 | 2.042123000  | -16.878206340 |
| C | -2.720883510 | 3.164066440  | -16.878155670 |
| C | -0.051102060 | 4.172757370  | -16.878206340 |
| C | 1.379720160  | 3.938387460  | -16.878155670 |
| C | 3.588162850  | 2.130634370  | -16.878206340 |
| C | 4.100603670  | 0.774321020  | -16.878155670 |
| C | 3.639264910  | -2.042123000 | -16.878206340 |
| C | 2.720883510  | -3.164066440 | -16.878155670 |
| C | 0.051102060  | -4.172757370 | -16.878206340 |
| C | -1.379720160 | -3.938387460 | -16.878155670 |
| C | -4.166052300 | -0.047362690 | -15.626469780 |
| C | -3.933223140 | 1.374017610  | -15.626517260 |
| C | -2.124043440 | 3.584225780  | -15.626469780 |
| C | -0.776677420 | 4.093279960  | -15.626517260 |
| C | 2.042008860  | 3.631588470  | -15.626469780 |
| C | 3.156545720  | 2.719262360  | -15.626517260 |
| C | 4.166052300  | 0.047362690  | -15.626469780 |
| C | 3.933223140  | -1.374017610 | -15.626517260 |
| C | 2.124043440  | -3.584225780 | -15.626469780 |
| C | 0.776677420  | -4.093279960 | -15.626517260 |
| C | -2.042008860 | -3.631588470 | -15.626469780 |
| C | -3.156545720 | -2.719262360 | -15.626517260 |
| C | -3.636485180 | 2.041883450  | -14.373233780 |
| C | -2.720128900 | 3.161354880  | -14.373283490 |
| C | -0.049919650 | 4.170230270  | -14.373233780 |
| C | 1.377749190  | 3.936378170  | -14.373283490 |
| C | 3.586565530  | 2.128346820  | -14.373233780 |
| C | 4.097878090  | 0.775023290  | -14.373283490 |
| C | 3.636485180  | -2.041883450 | -14.373233780 |
| C | 2.720128900  | -3.161354880 | -14.373283490 |
| C | 0.049919650  | -4.170230270 | -14.373233780 |
| C | -1.377749190 | -3.936378170 | -14.373283490 |
| C | -3.586565530 | -2.128346820 | -14.373233780 |
| C | -4.097878090 | -0.775023290 | -14.373283490 |
| C | -2.130259700 | 3.587352460  | -13.127424520 |
| C | -0.774140890 | 4.099722960  | -13.127411440 |
| C | 2.041608510  | 3.638535250  | -13.127424520 |
| C | 3.163393790  | 2.720287160  | -13.127411440 |
| C | 4.171868210  | 0.051182790  | -13.127424520 |
| C | 3.937534680  | -1.379435800 | -13.127411440 |
| C | 2.130259700  | -3.587352460 | -13.127424520 |



|   |              |              |               |
|---|--------------|--------------|---------------|
| C | 0.774140890  | -4.099722960 | -13.127411440 |
| C | -2.041608510 | -3.638535250 | -13.127424520 |
| C | -3.163393790 | -2.720287160 | -13.127411440 |
| C | -4.171868210 | -0.051182790 | -13.127424520 |
| C | -3.937534680 | 1.379435800  | -13.127411440 |
| C | -0.047869360 | 4.166142790  | -11.876760370 |
| C | 1.374393930  | 3.933189620  | -11.876747880 |
| C | 3.584050810  | 2.124527480  | -11.876760370 |
| C | 4.093439100  | 0.776334750  | -11.876747880 |
| C | 3.631920180  | -2.041615310 | -11.876760370 |
| C | 2.719045160  | -3.156854870 | -11.876747880 |
| C | 0.047869360  | -4.166142790 | -11.876760370 |
| C | -1.374393930 | -3.933189620 | -11.876747880 |
| C | -3.584050810 | -2.124527480 | -11.876760370 |
| C | -4.093439100 | -0.776334750 | -11.876747880 |
| C | -3.631920180 | 2.041615310  | -11.876760370 |
| C | -2.719045160 | 3.156854870  | -11.876747880 |
| C | 2.042000030  | 3.635863980  | -10.623210970 |
| C | 3.160684720  | 2.720194640  | -10.623201860 |
| C | 4.169750590  | 0.049508090  | -10.623210970 |
| C | 3.936100030  | -1.377135940 | -10.623201860 |
| C | 2.127750560  | -3.586355890 | -10.623210970 |
| C | 0.775415300  | -4.097330590 | -10.623201860 |
| C | -2.042000030 | -3.635863980 | -10.623210970 |
| C | -3.160684720 | -2.720194640 | -10.623201860 |
| C | -4.169750590 | -0.049508090 | -10.623210970 |
| C | -3.936100030 | 1.377135940  | -10.623201860 |
| C | -2.127750560 | 3.586355890  | -10.623210970 |
| C | -0.775415300 | 4.097330590  | -10.623201860 |
| C | 3.587934080  | 2.130554490  | -9.376807700  |
| C | 4.100349190  | 0.774236220  | -9.376858630  |
| C | 3.639081350  | -2.041964820 | -9.376807700  |
| C | 2.720682830  | -3.163888450 | -9.376858630  |
| C | 0.051147270  | -4.172519310 | -9.376807700  |
| C | -1.379666360 | -3.938124670 | -9.376858630  |
| C | -3.587934080 | -2.130554490 | -9.376807700  |
| C | -4.100349190 | -0.774236220 | -9.376858630  |
| C | -3.639081350 | 2.041964820  | -9.376807700  |
| C | -2.720682830 | 3.163888450  | -9.376858630  |
| C | -0.051147270 | 4.172519310  | -9.376807700  |
| C | 1.379666360  | 3.938124670  | -9.376858630  |
| C | 4.166794620  | 0.048083770  | -8.127183370  |
| C | 3.933691780  | -1.374983600 | -8.127107750  |
| C | 2.125039070  | -3.584508110 | -8.127183370  |
| C | 0.776075160  | -4.094168810 | -8.127107750  |
| C | -2.041755540 | -3.632591870 | -8.127183370  |
| C | -3.157616610 | -2.719185210 | -8.127107750  |
| C | -4.166794620 | -0.048083770 | -8.127183370  |
| C | -3.933691780 | 1.374983600  | -8.127107750  |
| C | -2.125039070 | 3.584508110  | -8.127183370  |
| C | -0.776075160 | 4.094168810  | -8.127107750  |
| C | 2.041755540  | 3.632591870  | -8.127183370  |
| C | 3.157616610  | 2.719185210  | -8.127107750  |
| C | 3.634949620  | -2.041826750 | -6.873431270  |
| C | 2.719757420  | -3.159892570 | -6.873422440  |
| C | 0.049200980  | -4.168872090 | -6.873431270  |
| C | -1.376668520 | -3.935325310 | -6.873422440  |
| C | -3.585748650 | -2.127045340 | -6.873431270  |
| C | -4.096425950 | -0.775432740 | -6.873422440  |
| C | -3.634949620 | 2.041826750  | -6.873431270  |
| C | -2.719757420 | 3.159892570  | -6.873422440  |
| C | -0.049200980 | 4.168872090  | -6.873431270  |
| C | 1.376668520  | 3.935325310  | -6.873422440  |
| C | 3.585748650  | 2.127045340  | -6.873431270  |
| C | 4.096425950  | 0.775432740  | -6.873422440  |
| C | 2.130635660  | -3.587902300 | -5.626144770  |
| C | 0.774207450  | -4.100362740 | -5.626186230  |
| C | -2.041896710 | -3.639135750 | -5.626144770  |
| C | -3.163914570 | -2.720664690 | -5.626186230  |
| C | -4.172532360 | -0.051233460 | -5.626144770  |

|   |              |              |              |
|---|--------------|--------------|--------------|
| C | -3.938122020 | 1.379698050  | -5.626186230 |
| C | -2.130635660 | 3.587902300  | -5.626144770 |
| C | -0.774207450 | 4.100362740  | -5.626186230 |
| C | 2.041896710  | 3.639135750  | -5.626144770 |
| C | 3.163914570  | 2.720664690  | -5.626186230 |
| C | 4.172532360  | 0.051233460  | -5.626144770 |
| C | 3.938122020  | -1.379698050 | -5.626186230 |
| C | 0.048350270  | -4.167667460 | -4.376988640 |
| C | -1.375428030 | -3.934491210 | -4.377039960 |
| C | -3.585130760 | -2.125706290 | -4.376988640 |
| C | -4.095083360 | -0.776089990 | -4.377039960 |
| C | -3.633481030 | 2.041961160  | -4.376988640 |
| C | -2.719655320 | 3.158401220  | -4.377039960 |
| C | -0.048350270 | 4.167667460  | -4.376988640 |
| C | 1.375428030  | 3.934491210  | -4.377039960 |
| C | 3.585130760  | 2.125706290  | -4.376988640 |
| C | 4.095083360  | 0.776089990  | -4.377039960 |
| C | 3.633481030  | -2.041961160 | -4.376988640 |
| C | 2.719655320  | -3.158401220 | -4.377039960 |
| C | -2.041901880 | -3.634575910 | -3.123105470 |
| C | -3.159426280 | -2.719801580 | -3.123078970 |
| C | -4.168586010 | -0.048949050 | -3.123105470 |
| C | -3.935130410 | 1.376242630  | -3.123078970 |
| C | -2.126684130 | 3.585626860  | -3.123105470 |
| C | -0.775704120 | 4.096044210  | -3.123078970 |
| C | 2.041901880  | 3.634575910  | -3.123105470 |
| C | 3.159426280  | 2.719801580  | -3.123078970 |
| C | 4.168586010  | 0.048949050  | -3.123105470 |
| C | 3.935130410  | -1.376242630 | -3.123078970 |
| C | 2.126684130  | -3.585626860 | -3.123105470 |
| C | 0.775704120  | -4.096044210 | -3.123078970 |
| C | -3.587813780 | -2.130674540 | -1.875263850 |
| C | -4.100329480 | -0.774206120 | -1.875199690 |
| C | -3.639125170 | 2.041800610  | -1.875263850 |
| C | -2.720646910 | 3.163886430  | -1.875199690 |
| C | -0.051311380 | 4.172475150  | -1.875263850 |
| C | 1.379682570  | 3.938092550  | -1.875199690 |
| C | 3.587813780  | 2.130674540  | -1.875263850 |
| C | 4.100329480  | 0.774206120  | -1.875199690 |
| C | 3.639125170  | -2.041800610 | -1.875263850 |
| C | 2.720646910  | -3.163886430 | -1.875199690 |
| C | 0.051311380  | -4.172475150 | -1.875263850 |
| C | -1.379682570 | -3.938092550 | -1.875199690 |
| C | -4.168130500 | -0.048667530 | -0.626832700 |
| C | -3.934817800 | 1.375833920  | -0.626842330 |
| C | -2.126212570 | 3.585373140  | -0.626832700 |
| C | -0.775901780 | 4.095569140  | -0.626842330 |
| C | 2.041917930  | 3.634040660  | -0.626832700 |
| C | 3.158916030  | 2.719735220  | -0.626842330 |
| C | 4.168130500  | 0.048667530  | -0.626832700 |
| C | 3.934817800  | -1.375833920 | -0.626842330 |
| C | 2.126212570  | -3.585373140 | -0.626832700 |
| C | 0.775901780  | -4.095569140 | -0.626842330 |
| C | -2.041917930 | -3.634040660 | -0.626832700 |
| C | -3.158916030 | -2.719735220 | -0.626842330 |
| C | -3.634021660 | 2.041968130  | 0.626834160  |
| C | -2.719689160 | 3.158946940  | 0.626822880  |
| C | -0.048614560 | 4.168139140  | 0.626834160  |
| C | 1.375883720  | 3.934793380  | 0.626822880  |
| C | 3.585407100  | 2.126171010  | 0.626834160  |
| C | 4.095572880  | 0.775846430  | 0.626822880  |
| C | 3.634021660  | -2.041968130 | 0.626834160  |
| C | 2.719689160  | -3.158946940 | 0.626822880  |
| C | 0.048614560  | -4.168139140 | 0.626834160  |
| C | -1.375883720 | -3.934793380 | 0.626822880  |
| C | -3.585407100 | -2.126171010 | 0.626834160  |
| C | -4.095572880 | -0.775846430 | 0.626822880  |
| C | -2.130594140 | 3.587862720  | 1.875190990  |
| C | -0.774113430 | 4.100349310  | 1.875254020  |
| C | 2.041883190  | 3.639080010  | 1.875190990  |

|   |              |              |             |
|---|--------------|--------------|-------------|
| C | 3.163949960  | 2.720576550  | 1.875254020 |
| C | 4.172477330  | 0.051217290  | 1.875190990 |
| C | 3.938063380  | -1.379772760 | 1.875254020 |
| C | 2.130594140  | -3.587862720 | 1.875190990 |
| C | 0.774113430  | -4.100349310 | 1.875254020 |
| C | -2.041883190 | -3.639080010 | 1.875190990 |
| C | -3.163949960 | -2.720576550 | 1.875254020 |
| C | -4.172477330 | -0.051217290 | 1.875190990 |
| C | -3.938063380 | 1.379772760  | 1.875254020 |
| C | -0.048900720 | 4.168568130  | 3.123071350 |
| C | 1.376293630  | 3.935136300  | 3.123097610 |
| C | 3.585635530  | 2.126633330  | 3.123071350 |
| C | 4.096074810  | 0.775662900  | 3.123097610 |
| C | 3.634536250  | -2.041934800 | 3.123071350 |
| C | 2.719781190  | -3.159473390 | 3.123097610 |
| C | 0.048900720  | -4.168568130 | 3.123071350 |
| C | -1.376293630 | -3.935136300 | 3.123097610 |
| C | -3.585635530 | -2.126633330 | 3.123071350 |
| C | -4.096074810 | -0.775662900 | 3.123097610 |
| C | -3.634536250 | 2.041934800  | 3.123071350 |
| C | -2.719781190 | 3.159473390  | 3.123097610 |
| C | 2.041992590  | 3.633502120  | 4.377035170 |
| C | 3.158392060  | 2.719622870  | 4.376980390 |
| C | 4.167701430  | 0.048333610  | 4.377035170 |
| C | 3.934458520  | -1.375436330 | 4.376980390 |
| C | 2.125708850  | -3.585168510 | 4.377035170 |
| C | 0.776066460  | -4.095059200 | 4.376980390 |
| C | -2.041992590 | -3.633502120 | 4.377035170 |
| C | -3.158392060 | -2.719622870 | 4.376980390 |
| C | -4.167701430 | -0.048333610 | 4.377035170 |
| C | -3.934458520 | 1.375436330  | 4.376980390 |
| C | -2.125708850 | 3.585168510  | 4.377035170 |
| C | -0.776066460 | 4.095059200  | 4.376980390 |
| C | 3.587889640  | 2.130615690  | 5.626181650 |
| C | 4.100392740  | 0.774201290  | 5.626137120 |
| C | 3.639112130  | -2.041895730 | 5.626181650 |
| C | 2.720674360  | -3.163943640 | 5.626137120 |
| C | 0.051222500  | -4.172511420 | 5.626181650 |
| C | -1.379718390 | -3.938144930 | 5.626137120 |
| C | -3.587889640 | -2.130615690 | 5.626181650 |
| C | -4.100392740 | -0.774201290 | 5.626137120 |
| C | -3.639112130 | 2.041895730  | 5.626181650 |
| C | -2.720674360 | 3.163943640  | 5.626137120 |
| C | -0.051222500 | 4.172511420  | 5.626181650 |
| C | 1.379718390  | 3.938144930  | 5.626137120 |
| C | 4.168890520  | 0.049242800  | 6.873419380 |
| C | 3.935326740  | -1.376623510 | 6.873427120 |
| C | 2.127090770  | -3.585743700 | 6.873419380 |
| C | 0.775472440  | -4.096404680 | 6.873427120 |
| C | -2.041799750 | -3.634986490 | 6.873419380 |
| C | -3.159854300 | -2.719781170 | 6.873427120 |
| C | -4.168890520 | -0.049242800 | 6.873419380 |
| C | -3.935326740 | 1.376623510  | 6.873427120 |
| C | -2.127090770 | 3.585743700  | 6.873419380 |
| C | -0.775472440 | 4.096404680  | 6.873427120 |
| C | 2.041799750  | 3.634986490  | 6.873419380 |
| C | 3.159854300  | 2.719781170  | 6.873427120 |
| C | 3.632639240  | -2.041686320 | 8.127109190 |
| C | 2.719245180  | -3.157561060 | 8.127181490 |
| C | 0.048167400  | -4.166801020 | 8.127109190 |
| C | -1.374905510 | -3.933715930 | 8.127181490 |
| C | -3.584471840 | -2.125114700 | 8.127109190 |
| C | -4.094150680 | -0.776154870 | 8.127181490 |
| C | -3.632639240 | 2.041686320  | 8.127109190 |
| C | -2.719245180 | 3.157561060  | 8.127181490 |
| C | -0.048167400 | 4.166801020  | 8.127109190 |
| C | 1.374905510  | 3.933715930  | 8.127181490 |
| C | 3.584471840  | 2.125114700  | 8.127109190 |
| C | 4.094150680  | 0.776154870  | 8.127181490 |
| C | 2.130584020  | -3.587895810 | 9.376861930 |

|   |              |              |              |
|---|--------------|--------------|--------------|
| C | 0.774282210  | -4.100363030 | 9.376807070  |
| C | -2.041916910 | -3.639087800 | 9.376861930  |
| C | -3.163877450 | -2.720729580 | 9.376807070  |
| C | -4.172500930 | -0.051191980 | 9.376861930  |
| C | -3.938159660 | 1.379633460  | 9.376807070  |
| C | -2.130584020 | 3.587895810  | 9.376861930  |
| C | -0.774282210 | 4.100363030  | 9.376807070  |
| C | 2.041916910  | 3.639087800  | 9.376861930  |
| C | 3.163877450  | 2.720729580  | 9.376807070  |
| C | 4.172500930  | 0.051191980  | 9.376861930  |
| C | 3.938159660  | -1.379633460 | 9.376807070  |
| C | 0.049439190  | -4.169772290 | 10.623206640 |
| C | -1.377193930 | -3.936057960 | 10.623214620 |
| C | -3.586409130 | -2.127701740 | 10.623206640 |
| C | -4.097323150 | -0.775344050 | 10.623214620 |
| C | -3.635848330 | 2.042070550  | 10.623206640 |
| C | -2.720129220 | 3.160713910  | 10.623214620 |
| C | -0.049439190 | 4.169772290  | 10.623206640 |
| C | 1.377193930  | 3.936057960  | 10.623214620 |
| C | 3.586409130  | 2.127701740  | 10.623206640 |
| C | 4.097323150  | 0.775344050  | 10.623214620 |
| C | 3.635848330  | -2.042070550 | 10.623206640 |
| C | 2.720129220  | -3.160713910 | 10.623214620 |
| C | -2.041698410 | -3.631861750 | 11.876754770 |
| C | -3.156927440 | -2.718972910 | 11.876765870 |
| C | -4.166133750 | -0.047768180 | 11.876754770 |
| C | -3.933163330 | 1.374492900  | 11.876765870 |
| C | -2.124435330 | 3.584093570  | 11.876754770 |
| C | -0.776235900 | 4.093465810  | 11.876765870 |
| C | 2.041698410  | 3.631861750  | 11.876754770 |
| C | 3.156927440  | 2.718972910  | 11.876765870 |
| C | 4.166133750  | 0.047768180  | 11.876754770 |
| C | 3.933163330  | -1.374492900 | 11.876765870 |
| C | 2.124435330  | -3.584093570 | 11.876754770 |
| C | 0.776235900  | -4.093465810 | 11.876765870 |
| C | -3.587357980 | -2.130237420 | 13.127418790 |
| C | -4.099729110 | -0.774118830 | 13.127427710 |
| C | -3.638518710 | 2.041624440  | 13.127418790 |
| C | -2.720271130 | 3.163410140  | 13.127427710 |
| C | -0.051160730 | 4.171861860  | 13.127418790 |
| C | 1.379457980  | 3.937528970  | 13.127427710 |
| C | 3.587357980  | 2.130237420  | 13.127418790 |
| C | 4.099729110  | 0.774118830  | 13.127427710 |
| C | 3.638518710  | -2.041624440 | 13.127418790 |
| C | 2.720271130  | -3.163410140 | 13.127427710 |
| C | 0.051160730  | -4.171861860 | 13.127418790 |
| C | -1.379457980 | -3.937528970 | 13.127427710 |
| C | -4.170226850 | -0.049931120 | 14.373290290 |
| C | -3.936376470 | 1.377734480  | 14.373237610 |
| C | -2.128355040 | 3.586556830  | 14.373290290 |
| C | -0.775035180 | 4.097869260  | 14.373237610 |
| C | 2.041871810  | 3.636487950  | 14.373290290 |
| C | 3.161341290  | 2.720134790  | 14.373237610 |
| C | 4.170226850  | 0.049931120  | 14.373290290 |
| C | 3.936376470  | -1.377734480 | 14.373237610 |
| C | 2.128355040  | -3.586556830 | 14.373290290 |
| C | 0.775035180  | -4.097869260 | 14.373237610 |
| C | -2.041871810 | -3.636487950 | 14.373290290 |
| C | -3.161341290 | -2.720134790 | 14.373237610 |
| C | -3.631597210 | 2.041970750  | 15.626524780 |
| C | -2.719289360 | 3.156520680  | 15.626476030 |
| C | -0.047400060 | 4.166040820  | 15.626524780 |
| C | 1.373982420  | 3.933234000  | 15.626476030 |
| C | 3.584197150  | 2.124070070  | 15.626524780 |
| C | 4.093271770  | 0.776713320  | 15.626476030 |
| C | 3.631597210  | -2.041970750 | 15.626524780 |
| C | 2.719289360  | -3.156520680 | 15.626476030 |
| C | 0.047400060  | -4.166040820 | 15.626524780 |
| C | -1.373982420 | -3.933234000 | 15.626476030 |
| C | -3.584197150 | -2.124070070 | 15.626524780 |

|   |              |              |              |
|---|--------------|--------------|--------------|
| C | -4.093271770 | -0.776713320 | 15.626476030 |
| C | -2.130680570 | 3.588133380  | 16.878162090 |
| C | -0.774370920 | 4.100583180  | 16.878211650 |
| C | 2.042074370  | 3.639290190  | 16.878162090 |
| C | 3.164023740  | 2.720916480  | 16.878211650 |
| C | 4.172754940  | 0.051156820  | 16.878162090 |
| C | 3.938394660  | -1.379666700 | 16.878211650 |
| C | 2.130680570  | -3.588133380 | 16.878162090 |
| C | 0.774370920  | -4.100583180 | 16.878211650 |
| C | -2.042074370 | -3.639290190 | 16.878162090 |
| C | -3.164023740 | -2.720916480 | 16.878211650 |
| C | -4.172754940 | -0.051156820 | 16.878162090 |
| C | -3.938394660 | 1.379666700  | 16.878211650 |
| C | -0.050528060 | 4.172302450  | 18.123081850 |
| C | 1.378918610  | 3.938159000  | 18.123152660 |
| C | 3.588055890  | 2.129909810  | 18.123081850 |
| C | 4.100005040  | 0.774900950  | 18.123152660 |
| C | 3.638583950  | -2.042392650 | 18.123081850 |
| C | 2.721086430  | -3.163258040 | 18.123152660 |
| C | 0.050528060  | -4.172302450 | 18.123081850 |
| C | -1.378918610 | -3.938159000 | 18.123152660 |
| C | -3.588055890 | -2.129909810 | 18.123081850 |
| C | -4.100005040 | -0.774900950 | 18.123152660 |
| C | -3.638583950 | 2.042392650  | 18.123081850 |
| C | -2.721086430 | 3.163258040  | 18.123152660 |
| C | 2.042467510  | 3.630860730  | 19.376173130 |
| C | 3.155692940  | 2.719639870  | 19.376140860 |
| C | 4.165651390  | 0.046601620  | 19.376173130 |
| C | 3.933123680  | -1.373090320 | 19.376140860 |
| C | 2.123183880  | -3.584259120 | 19.376173130 |
| C | 0.777430740  | -4.092730190 | 19.376140860 |
| C | -2.042467510 | -3.630860730 | 19.376173130 |
| C | -3.155692940 | -2.719639870 | 19.376140860 |
| C | -4.165651390 | -0.046601620 | 19.376173130 |
| C | -3.933123680 | 1.373090320  | 19.376140860 |
| C | -2.123183880 | 3.584259120  | 19.376173130 |
| C | -0.777430740 | 4.092730190  | 19.376140860 |
| C | 3.586642190  | 2.129665060  | 20.629836440 |
| C | 4.098826000  | 0.774094980  | 20.629769550 |
| C | 3.637665140  | -2.041290720 | 20.629836440 |
| C | 2.719798920  | -3.162639950 | 20.629769550 |
| C | 0.051022940  | -4.170955780 | 20.629836440 |
| C | -1.379027080 | -3.936734930 | 20.629769550 |
| C | -3.586642190 | -2.129665060 | 20.629836440 |
| C | -4.098826000 | -0.774094980 | 20.629769550 |
| C | -3.637665140 | 2.041290720  | 20.629836440 |
| C | -2.719798920 | 3.162639950  | 20.629769550 |
| C | -0.051022940 | 4.170955780  | 20.629836440 |
| C | 1.379027080  | 3.936734930  | 20.629769550 |
| C | 4.166731750  | 0.051701340  | 21.873074950 |
| C | 3.932478510  | -1.378349270 | 21.872968940 |
| C | 2.128140550  | -3.582644880 | 21.873074950 |
| C | 0.772553770  | -4.094800930 | 21.872968940 |
| C | -2.038591200 | -3.634346220 | 21.873074950 |
| C | -3.159924740 | -2.716451650 | 21.872968940 |
| C | -4.166731750 | -0.051701340 | 21.873074950 |
| C | -3.932478510 | 1.378349270  | 21.872968940 |
| C | -2.128140550 | 3.582644880  | 21.873074950 |
| C | -0.772553770 | 4.094800930  | 21.872968940 |
| C | 2.038591200  | 3.634346220  | 21.873074950 |
| C | 3.159924740  | 2.716451650  | 21.872968940 |
| C | 3.615172510  | -2.034727510 | 23.125549850 |
| C | 2.708877770  | -3.141870470 | 23.125594100 |
| C | 0.045460540  | -4.148194990 | 23.125549850 |
| C | -1.366500750 | -3.916892200 | 23.125594100 |
| C | -3.569711970 | -2.113467480 | 23.125549850 |
| C | -4.075378520 | -0.775021730 | 23.125594100 |
| C | -3.615172510 | 2.034727510  | 23.125549850 |
| C | -2.708877770 | 3.141870470  | 23.125594100 |
| C | -0.045460540 | 4.148194990  | 23.125549850 |

|   |              |              |               |
|---|--------------|--------------|---------------|
| C | 1.366500750  | 3.916892200  | 23.125594100  |
| C | 3.569711970  | 2.113467480  | 23.125549850  |
| C | 4.075378520  | 0.775021730  | 23.125594100  |
| C | 2.126526230  | -3.575477850 | 24.387568880  |
| C | 0.769061760  | -4.088371870 | 24.387596190  |
| C | -2.033191540 | -3.629364660 | 24.387568880  |
| C | -3.156103020 | -2.710212960 | 24.387596190  |
| C | -4.159717760 | -0.053886810 | 24.387568880  |
| C | -3.925164780 | 1.378158910  | 24.387596190  |
| C | -2.126526230 | 3.575477850  | 24.387568880  |
| C | -0.769061760 | 4.088371870  | 24.387596190  |
| C | 2.033191540  | 3.629364660  | 24.387568880  |
| C | 3.156103020  | 2.710212960  | 24.387596190  |
| C | 4.159717760  | 0.053886810  | 24.387568880  |
| C | 3.925164780  | -1.378158910 | 24.387596190  |
| C | 0.055445020  | -4.212678920 | 25.627608020  |
| C | -1.396490500 | -3.974837970 | 25.627618760  |
| C | -3.620564450 | -2.154356260 | 25.627608020  |
| C | -4.140555910 | -0.778022730 | 25.627618760  |
| C | -3.676009470 | 2.058322660  | 25.627608020  |
| C | -2.744065410 | 3.196815240  | 25.627618760  |
| C | -0.055445020 | 4.212678920  | 25.627608020  |
| C | 1.396490500  | 3.974837970  | 25.627618760  |
| C | 3.620564450  | 2.154356260  | 25.627608020  |
| C | 4.140555910  | 0.778022730  | 25.627618760  |
| C | 3.676009470  | -2.058322660 | 25.627608020  |
| C | 2.744065410  | -3.196815240 | 25.627618760  |
| C | -2.133481500 | -3.699750750 | 26.841903700  |
| C | -3.205255280 | -2.822419380 | 26.841830250  |
| C | -4.270818890 | -0.002226200 | 26.841903700  |
| C | -4.046914520 | 1.364622810  | 26.841830250  |
| C | -2.137337390 | 3.697524550  | 26.841903700  |
| C | -0.841659240 | 4.187042180  | 26.841830250  |
| C | 2.133481500  | 3.699750750  | 26.841903700  |
| C | 3.205255280  | 2.822419380  | 26.841830250  |
| C | 4.270818890  | 0.002226200  | 26.841903700  |
| C | 4.046914520  | -1.364622810 | 26.841830250  |
| C | 2.137337390  | -3.697524550 | 26.841903700  |
| C | 0.841659240  | -4.187042180 | 26.841830250  |
| H | -0.520228230 | 4.419558990  | -27.798086830 |
| H | 1.902991760  | 4.022643560  | -27.798059630 |
| H | 3.567336240  | 2.660310360  | -27.798086830 |
| H | 4.435207400  | 0.363282570  | -27.798059630 |
| H | 4.087564470  | -1.759248630 | -27.798086830 |
| H | 2.532215630  | -3.659360990 | -27.798059630 |
| H | 0.520228230  | -4.419558990 | -27.798086830 |
| H | -1.902991760 | -4.022643560 | -27.798059630 |
| H | -3.567336240 | -2.660310360 | -27.798086830 |
| H | -4.435207400 | -0.363282570 | -27.798059630 |
| H | -4.087564470 | 1.759248630  | -27.798086830 |
| H | -2.532215630 | 3.659360990  | -27.798059630 |
| H | -1.759263460 | -4.087542470 | 27.798049380  |
| H | -3.659381240 | -2.532201040 | 27.798073350  |
| H | -4.419547350 | -0.520204380 | 27.798049380  |
| H | -4.022641050 | 1.903016600  | 27.798073350  |
| H | -2.660283890 | 3.567338090  | 27.798049380  |
| H | -0.363259810 | 4.435217640  | 27.798073350  |
| H | 1.759263460  | 4.087542470  | 27.798049380  |
| H | 3.659381240  | 2.532201040  | 27.798073350  |
| H | 4.419547350  | 0.520204380  | 27.798049380  |
| H | 4.022641050  | -1.903016600 | 27.798073350  |
| H | 2.660283890  | -3.567338090 | 27.798049380  |
| H | 0.363259810  | -4.435217640 | 27.798073350  |

Nanotube (6,6) u22v6s  
B3LYP/STO-3G Energy: -20343.863482

C -0.00133616 4.26886159 -27.47546582

|   |             |             |              |
|---|-------------|-------------|--------------|
| C | 1.36397054  | 4.04517629  | -27.47552724 |
| C | 3.69627450  | 2.13558794  | -27.47546582 |
| C | 4.18521070  | 0.84135501  | -27.47552724 |
| C | 3.69761066  | -2.13327365 | -27.47546582 |
| C | 2.82124016  | -3.20382129 | -27.47552724 |
| C | 0.00133616  | -4.26886159 | -27.47546582 |
| C | -1.36397054 | -4.04517629 | -27.47552724 |
| C | -3.69627450 | -2.13558794 | -27.47546582 |
| C | -4.18521070 | -0.84135501 | -27.47552724 |
| C | -3.69761066 | 2.13327365  | -27.47546582 |
| C | -2.82124016 | 3.20382129  | -27.47552724 |
| C | 2.05854799  | 3.67394420  | -26.25959241 |
| C | 3.19512459  | 2.74342561  | -26.25959231 |
| C | 4.21100300  | 0.05421725  | -26.25959241 |
| C | 3.97343857  | -1.39534625 | -26.25959231 |
| C | 2.15245501  | -3.61972695 | -26.25959241 |
| C | 0.77831398  | -4.13877187 | -26.25959231 |
| C | -2.05854799 | -3.67394420 | -26.25959241 |
| C | -3.19512459 | -2.74342561 | -26.25959231 |
| C | -4.21100300 | -0.05421725 | -26.25959241 |
| C | -3.97343857 | 1.39534625  | -26.25959231 |
| C | -2.15245501 | 3.61972695  | -26.25959241 |
| C | -0.77831398 | 4.13877187  | -26.25959231 |
| C | 3.57639620  | 2.12742717  | -25.01925237 |
| C | 4.08976520  | 0.76905494  | -25.01922101 |
| C | 3.63060407  | -2.03353637 | -25.01925237 |
| C | 2.71090372  | -3.15731309 | -25.01922101 |
| C | 0.05420788  | -4.16096355 | -25.01925237 |
| C | -1.37886148 | -3.92636803 | -25.01922101 |
| C | -3.57639620 | -2.12742717 | -25.01925237 |
| C | -4.08976520 | -0.76905494 | -25.01922101 |
| C | -3.63060407 | 2.03353637  | -25.01925237 |
| C | -2.71090372 | 3.15731309  | -25.01922101 |
| C | -0.05420788 | 4.16096355  | -25.01925237 |
| C | 1.37886148  | 3.92636803  | -25.01922101 |
| C | 4.14853061  | 0.04551109  | -23.75824304 |
| C | 3.91746162  | -1.36573954 | -23.75821690 |
| C | 2.11367906  | -3.56997735 | -23.75824304 |
| C | 0.77596567  | -4.07549105 | -23.75821690 |
| C | -2.03485155 | -3.61548844 | -23.75824304 |
| C | -3.14149595 | -2.70975151 | -23.75821690 |
| C | -4.14853061 | -0.04551109 | -23.75824304 |
| C | -3.91746162 | 1.36573954  | -23.75821690 |
| C | -2.11367906 | 3.56997735  | -23.75824304 |
| C | -0.77596567 | 4.07549105  | -23.75821690 |
| C | 2.03485155  | 3.61548844  | -23.75824304 |
| C | 3.14149595  | 2.70975151  | -23.75821690 |
| C | 3.63307391  | -2.03798055 | -22.50399613 |
| C | 2.71692033  | -3.15770705 | -22.50404810 |
| C | 0.05159403  | -4.16532457 | -22.50399613 |
| C | -1.37619436 | -3.93177555 | -22.50404810 |
| C | -3.58147988 | -2.12734403 | -22.50399613 |
| C | -4.09311469 | -0.77406850 | -22.50404810 |
| C | -3.63307391 | 2.03798055  | -22.50399613 |
| C | -2.71692033 | 3.15770705  | -22.50404810 |
| C | -0.05159403 | 4.16532457  | -22.50399613 |
| C | 1.37619436  | 3.93177555  | -22.50404810 |
| C | 3.58147988  | 2.12734403  | -22.50399613 |
| C | 4.09311469  | 0.77406850  | -22.50404810 |
| C | 2.13133610  | -3.58629070 | -21.26022057 |
| C | 0.77508388  | -4.09908999 | -21.26032621 |
| C | -2.04015081 | -3.63893656 | -21.26022057 |
| C | -3.16237412 | -2.72078733 | -21.26032621 |
| C | -4.17148690 | -0.05264585 | -21.26022057 |
| C | -3.93745801 | 1.37830266  | -21.26032621 |
| C | -2.13133610 | 3.58629070  | -21.26022057 |
| C | -0.77508388 | 4.09908999  | -21.26032621 |
| C | 2.04015081  | 3.63893656  | -21.26022057 |
| C | 3.16237412  | 2.72078733  | -21.26032621 |
| C | 4.17148690  | 0.05264585  | -21.26022057 |

|   |             |             |              |
|---|-------------|-------------|--------------|
| C | 3.93745801  | -1.37830266 | -21.26032621 |
| C | 0.04815734  | -4.16486199 | -20.00789547 |
| C | -1.37122940 | -3.93303907 | -20.00797824 |
| C | -3.58279762 | -2.12413647 | -20.00789547 |
| C | -4.09172645 | -0.77900003 | -20.00797824 |
| C | -3.63095496 | 2.04072552  | -20.00789547 |
| C | -2.72049704 | 3.15403903  | -20.00797824 |
| C | -0.04815734 | 4.16486199  | -20.00789547 |
| C | 1.37122940  | 3.93303907  | -20.00797824 |
| C | 3.58279762  | 2.12413647  | -20.00789547 |
| C | 4.09172645  | 0.77900003  | -20.00797824 |
| C | 3.63095496  | -2.04072552 | -20.00789547 |
| C | 2.72049704  | -3.15403903 | -20.00797824 |
| C | -2.03990500 | -3.63636420 | -18.75317037 |
| C | -3.15874488 | -2.72156954 | -18.75329262 |
| C | -4.16913627 | -0.05157255 | -18.75317037 |
| C | -3.93632080 | 1.37476854  | -18.75329262 |
| C | -2.12923127 | 3.58479165  | -18.75317037 |
| C | -0.77757592 | 4.09633808  | -18.75329262 |
| C | 2.03990500  | 3.63636420  | -18.75317037 |
| C | 3.15874488  | 2.72156954  | -18.75329262 |
| C | 4.16913627  | 0.05157255  | -18.75317037 |
| C | 3.93632080  | -1.37476854 | -18.75329262 |
| C | 2.12923127  | -3.58479165 | -18.75317037 |
| C | 0.77757592  | -4.09633808 | -18.75329262 |
| C | -3.58630853 | -2.13317036 | -17.50705801 |
| C | -4.09987511 | -0.77682425 | -17.50712222 |
| C | -3.64053398 | 2.03924911  | -17.50705801 |
| C | -2.72268709 | 3.16218387  | -17.50712222 |
| C | -0.05422546 | 4.17241947  | -17.50705801 |
| C | 1.37718802  | 3.93900813  | -17.50712222 |
| C | 3.58630853  | 2.13317036  | -17.50705801 |
| C | 4.09987511  | 0.77682425  | -17.50712222 |
| C | 3.64053398  | -2.03924911 | -17.50705801 |
| C | 2.72268709  | -3.16218387 | -17.50712222 |
| C | 0.05422546  | -4.17241947 | -17.50705801 |
| C | -1.37718802 | -3.93900813 | -17.50712222 |
| C | -4.16582330 | -0.05084825 | -16.25692460 |
| C | -3.93410840 | 1.37097609  | -16.25704365 |
| C | -2.12694753 | 3.58228468  | -16.25692460 |
| C | -0.77975408 | 4.09252586  | -16.25704365 |
| C | 2.03887577  | 3.63313293  | -16.25692460 |
| C | 3.15435432  | 2.72154977  | -16.25704365 |
| C | 4.16582330  | 0.05084825  | -16.25692460 |
| C | 3.93410840  | -1.37097609 | -16.25704365 |
| C | 2.12694753  | -3.58228468 | -16.25692460 |
| C | 0.77975408  | -4.09252586 | -16.25704365 |
| C | -2.03887577 | -3.63313293 | -16.25692460 |
| C | -3.15435432 | -2.72154977 | -16.25704365 |
| C | -3.63550473 | 2.03871201  | -15.00213358 |
| C | -2.72221716 | 3.15629545  | -15.00219507 |
| C | -0.05217597 | 4.16779545  | -15.00213358 |
| C | 1.37232346  | 3.93565694  | -15.00219507 |
| C | 3.58332875  | 2.12908344  | -15.00213358 |
| C | 4.09454062  | 0.77936149  | -15.00219507 |
| C | 3.63550473  | -2.03871201 | -15.00213358 |
| C | 2.72221716  | -3.15629545 | -15.00219507 |
| C | 0.05217597  | -4.16779545 | -15.00213358 |
| C | -1.37232346 | -3.93565694 | -15.00219507 |
| C | -3.58332875 | -2.12908344 | -15.00213358 |
| C | -4.09454062 | -0.77936149 | -15.00219507 |
| C | -2.13377000 | 3.58580794  | -13.75451885 |
| C | -0.77783267 | 4.09946387  | -13.75456655 |
| C | 2.03851577  | 3.64080300  | -13.75451885 |
| C | 3.16132352  | 2.72335478  | -13.75456655 |
| C | 4.17228577  | 0.05499506  | -13.75451885 |
| C | 3.93915619  | -1.37610909 | -13.75456655 |
| C | 2.13377000  | -3.58580794 | -13.75451885 |
| C | 0.77783267  | -4.09946387 | -13.75456655 |
| C | -2.03851577 | -3.64080300 | -13.75451885 |



|   |             |             |              |
|---|-------------|-------------|--------------|
| C | -3.16132352 | -2.72335478 | -13.75456655 |
| C | -4.17228577 | -0.05499506 | -13.75451885 |
| C | -3.93915619 | 1.37610909  | -13.75456655 |
| C | -0.05203165 | 4.16677138  | -12.50593127 |
| C | 1.37141552  | 3.93491594  | -12.50585629 |
| C | 3.58251404  | 2.12844642  | -12.50593127 |
| C | 4.09344493  | 0.77977729  | -12.50585629 |
| C | 3.63454569  | -2.03832495 | -12.50593127 |
| C | 2.72202941  | -3.15513866 | -12.50585629 |
| C | 0.05203165  | -4.16677138 | -12.50593127 |
| C | -1.37141552 | -3.93491594 | -12.50585629 |
| C | -3.58251404 | -2.12844642 | -12.50593127 |
| C | -4.09344493 | -0.77977729 | -12.50585629 |
| C | -3.63454569 | 2.03832495  | -12.50593127 |
| C | -2.72202941 | 3.15513866  | -12.50585629 |
| C | 2.03834048  | 3.63432627  | -11.25141018 |
| C | 3.15503704  | 2.72203321  | -11.25135752 |
| C | 4.16658911  | 0.05190850  | -11.25141018 |
| C | 3.93486843  | -1.37132562 | -11.25135752 |
| C | 2.12824863  | -3.58241777 | -11.25141018 |
| C | 0.77983139  | -4.09335883 | -11.25135752 |
| C | -2.03834048 | -3.63432627 | -11.25141018 |
| C | -3.15503704 | -2.72203321 | -11.25135752 |
| C | -4.16658911 | -0.05190850 | -11.25141018 |
| C | -3.93486843 | 1.37132562  | -11.25135752 |
| C | -2.12824863 | 3.58241777  | -11.25141018 |
| C | -0.77983139 | 4.09335883  | -11.25135752 |
| C | 3.58557217  | 2.13344213  | -10.00245162 |
| C | 4.09916191  | 0.77799079  | -10.00251135 |
| C | 3.64040117  | -2.03847552 | -10.00245162 |
| C | 2.72334075  | -3.16098295 | -10.00251135 |
| C | 0.05482900  | -4.17191765 | -10.00245162 |
| C | -1.37582117 | -3.93897375 | -10.00251135 |
| C | -3.58557217 | -2.13344213 | -10.00245162 |
| C | -4.09916191 | -0.77799079 | -10.00251135 |
| C | -3.64040117 | 2.03847552  | -10.00245162 |
| C | -2.72334075 | 3.16098295  | -10.00251135 |
| C | -0.05482900 | 4.17191765  | -10.00245162 |
| C | 1.37582117  | 3.93897375  | -10.00251135 |
| C | 4.16814547  | 0.05255988  | -8.75479587  |
| C | 3.93612522  | -1.37254906 | -8.75484636  |
| C | 2.12959092  | -3.58343992 | -8.75479587  |
| C | 0.77940026  | -4.09505896 | -8.75484636  |
| C | -2.03855454 | -3.63599980 | -8.75479587  |
| C | -3.15672496 | -2.72250990 | -8.75484636  |
| C | -4.16814547 | -0.05255988 | -8.75479587  |
| C | -3.93612522 | 1.37254906  | -8.75484636  |
| C | -2.12959092 | 3.58343992  | -8.75479587  |
| C | -0.77940026 | 4.09505896  | -8.75484636  |
| C | 2.03855454  | 3.63599980  | -8.75479587  |
| C | 3.15672496  | 2.72250990  | -8.75484636  |
| C | 3.63371113  | -2.03855554 | -7.50085101  |
| C | 2.72192107  | -3.15458993 | -7.50084954  |
| C | 0.05141468  | -4.16616392 | -7.50085101  |
| C | -1.37099449 | -3.93454776 | -7.50084954  |
| C | -3.58229645 | -2.12760838 | -7.50085101  |
| C | -4.09291555 | -0.77995782 | -7.50084954  |
| C | -3.63371113 | 2.03855554  | -7.50085101  |
| C | -2.72192107 | 3.15458993  | -7.50084954  |
| C | -0.05141468 | 4.16616392  | -7.50085101  |
| C | 1.37099449  | 3.93454776  | -7.50084954  |
| C | 3.58229645  | 2.12760838  | -7.50085101  |
| C | 4.09291555  | 0.77995782  | -7.50084954  |
| C | 2.13270423  | -3.58524467 | -6.25070255  |
| C | 0.77791662  | -4.09831989 | -6.25064823  |
| C | -2.03856085 | -3.63959837 | -6.25070255  |
| C | -3.16029083 | -2.72285550 | -6.25064823  |
| C | -4.17126507 | -0.05435371 | -6.25070255  |
| C | -3.93820745 | 1.37546439  | -6.25064823  |
| C | -2.13270423 | 3.58524467  | -6.25070255  |

|   |             |             |             |
|---|-------------|-------------|-------------|
| C | -0.77791662 | 4.09831989  | -6.25064823 |
| C | 2.03856085  | 3.63959837  | -6.25070255 |
| C | 3.16029083  | 2.72285550  | -6.25064823 |
| C | 4.17126507  | 0.05435371  | -6.25070255 |
| C | 3.93820745  | -1.37546439 | -6.25064823 |
| C | 0.05297833  | -4.16909209 | -5.00349283 |
| C | -1.37348032 | -3.93656811 | -5.00348950 |
| C | -3.58405049 | -2.13042662 | -5.00349283 |
| C | -4.09590815 | -0.77881521 | -5.00348950 |
| C | -3.63702882 | 2.03866547  | -5.00349283 |
| C | -2.72242783 | 3.15775291  | -5.00348950 |
| C | -0.05297833 | 4.16909209  | -5.00349283 |
| C | 1.37348032  | 3.93656811  | -5.00348950 |
| C | 3.58405049  | 2.13042662  | -5.00349283 |
| C | 4.09590815  | 0.77881521  | -5.00348950 |
| C | 3.63702882  | -2.03866547 | -5.00349283 |
| C | 2.72242783  | -3.15775291 | -5.00348950 |
| C | -2.03865320 | -3.63348062 | -3.75020975 |
| C | -3.15425058 | -2.72188262 | -3.75027739 |
| C | -4.16601312 | -0.05121485 | -3.75020975 |
| C | -3.93434478 | 1.37071982  | -3.75027739 |
| C | -2.12735992 | 3.58226577  | -3.75020975 |
| C | -0.78009421 | 4.09260244  | -3.75027739 |
| C | 2.03865320  | 3.63348062  | -3.75020975 |
| C | 3.15425058  | 2.72188262  | -3.75027739 |
| C | 4.16601312  | 0.05121485  | -3.75020975 |
| C | 3.93434478  | -1.37071982 | -3.75027739 |
| C | 2.12735992  | -3.58226577 | -3.75020975 |
| C | 0.78009421  | -4.09260244 | -3.75027739 |
| C | -3.58484383 | -2.13217539 | -2.49893658 |
| C | -4.09769802 | -0.77832622 | -2.49894181 |
| C | -3.63893997 | 2.03847813  | -2.49893658 |
| C | -2.72289928 | 3.15954747  | -2.49894181 |
| C | -0.05409614 | 4.17065352  | -2.49893658 |
| C | 1.37479873  | 3.93787369  | -2.49894181 |
| C | 3.58484383  | 2.13217539  | -2.49893658 |
| C | 4.09769802  | 0.77832622  | -2.49894181 |
| C | 3.63893997  | -2.03847813 | -2.49893658 |
| C | 2.72289928  | -3.15954747 | -2.49894181 |
| C | 0.05409614  | -4.17065352 | -2.49893658 |
| C | -1.37479873 | -3.93787369 | -2.49894181 |
| C | -4.16984180 | -0.05359386 | -1.25222758 |
| C | -3.93726836 | 1.37413763  | -1.25216893 |
| C | -2.13133455 | 3.58439200  | -1.25222758 |
| C | -0.77859609 | 4.09684323  | -1.25216893 |
| C | 2.03850725  | 3.63798586  | -1.25222758 |
| C | 3.15867227  | 2.72270561  | -1.25216893 |
| C | 4.16984180  | 0.05359386  | -1.25222758 |
| C | 3.93726836  | -1.37413763 | -1.25216893 |
| C | 2.13133455  | -3.58439200 | -1.25222758 |
| C | 0.77859609  | -4.09684323 | -1.25216893 |
| C | -2.03850725 | -3.63798586 | -1.25222758 |
| C | -3.15867227 | -2.72270561 | -1.25216893 |
| C | -3.63324507 | 2.03862073  | 0.00000000  |
| C | -2.72183194 | 3.15408628  | 0.00000000  |
| C | -0.05112519 | 4.16579290  | 0.00000000  |
| C | 1.37060287  | 3.93421874  | 0.00000000  |
| C | 3.58211988  | 2.12717217  | 0.00000000  |
| C | 4.09243481  | 0.78013246  | 0.00000000  |
| C | 3.63324507  | -2.03862073 | 0.00000000  |
| C | 2.72183194  | -3.15408628 | 0.00000000  |
| C | 0.05112519  | -4.16579290 | 0.00000000  |
| C | -1.37060287 | -3.93421874 | 0.00000000  |
| C | -3.58211988 | -2.12717217 | 0.00000000  |
| C | -4.09243481 | -0.78013246 | 0.00000000  |
| C | -2.13133455 | 3.58439200  | 1.25222758  |
| C | -0.77859609 | 4.09684323  | 1.25216893  |
| C | 2.03850725  | 3.63798586  | 1.25222758  |
| C | 3.15867227  | 2.72270561  | 1.25216893  |
| C | 4.16984180  | 0.05359386  | 1.25222758  |

|   |             |             |            |
|---|-------------|-------------|------------|
| C | 3.93726836  | -1.37413763 | 1.25216893 |
| C | 2.13133455  | -3.58439200 | 1.25222758 |
| C | 0.77859609  | -4.09684323 | 1.25216893 |
| C | -2.03850725 | -3.63798586 | 1.25222758 |
| C | -3.15867227 | -2.72270561 | 1.25216893 |
| C | -4.16984180 | -0.05359386 | 1.25222758 |
| C | -3.93726836 | 1.37413763  | 1.25216893 |
| C | -0.05409614 | 4.17065352  | 2.49893658 |
| C | 1.37479873  | 3.93787369  | 2.49894181 |
| C | 3.58484383  | 2.13217539  | 2.49893658 |
| C | 4.09769802  | 0.77832622  | 2.49894181 |
| C | 3.63893997  | -2.03847813 | 2.49893658 |
| C | 2.72289928  | -3.15954747 | 2.49894181 |
| C | 0.05409614  | -4.17065352 | 2.49893658 |
| C | -1.37479873 | -3.93787369 | 2.49894181 |
| C | -3.58484383 | -2.13217539 | 2.49893658 |
| C | -4.09769802 | -0.77832622 | 2.49894181 |
| C | -3.63893997 | 2.03847813  | 2.49893658 |
| C | -2.72289928 | 3.15954747  | 2.49894181 |
| C | 2.03865320  | 3.63348062  | 3.75020975 |
| C | 3.15425058  | 2.72188262  | 3.75027739 |
| C | 4.16601312  | 0.05121485  | 3.75020975 |
| C | 3.93434478  | -1.37071982 | 3.75027739 |
| C | 2.12735992  | -3.58226577 | 3.75020975 |
| C | 0.78009421  | -4.09260244 | 3.75027739 |
| C | -2.03865320 | -3.63348062 | 3.75020975 |
| C | -3.15425058 | -2.72188262 | 3.75027739 |
| C | -4.16601312 | -0.05121485 | 3.75020975 |
| C | -3.93434478 | 1.37071982  | 3.75027739 |
| C | -2.12735992 | 3.58226577  | 3.75020975 |
| C | -0.78009421 | 4.09260244  | 3.75027739 |
| C | 3.58405049  | 2.13042662  | 5.00349283 |
| C | 4.09590815  | 0.77881521  | 5.00348950 |
| C | 3.63702882  | -2.03866547 | 5.00349283 |
| C | 2.72242783  | -3.15775291 | 5.00348950 |
| C | 0.05297833  | -4.16909209 | 5.00349283 |
| C | -1.37348032 | -3.93656811 | 5.00348950 |
| C | -3.58405049 | -2.13042662 | 5.00349283 |
| C | -4.09590815 | -0.77881521 | 5.00348950 |
| C | -3.63702882 | 2.03866547  | 5.00349283 |
| C | -2.72242783 | 3.15775291  | 5.00348950 |
| C | -0.05297833 | 4.16909209  | 5.00349283 |
| C | 1.37348032  | 3.93656811  | 5.00348950 |
| C | 4.17126507  | 0.05435371  | 6.25070255 |
| C | 3.93820745  | -1.37546439 | 6.25064823 |
| C | 2.13270423  | -3.58524467 | 6.25070255 |
| C | 0.77791662  | -4.09831989 | 6.25064823 |
| C | -2.03856085 | -3.63959837 | 6.25070255 |
| C | -3.16029083 | -2.72285550 | 6.25064823 |
| C | -4.17126507 | -0.05435371 | 6.25070255 |
| C | -3.93820745 | 1.37546439  | 6.25064823 |
| C | -2.13270423 | 3.58524467  | 6.25070255 |
| C | -0.77791662 | 4.09831989  | 6.25064823 |
| C | 2.03856085  | 3.63959837  | 6.25070255 |
| C | 3.16029083  | 2.72285550  | 6.25064823 |
| C | 3.63371113  | -2.03855554 | 7.50085101 |
| C | 2.72192107  | -3.15458993 | 7.50084954 |
| C | 0.05141468  | -4.16616392 | 7.50085101 |
| C | -1.37099449 | -3.93454776 | 7.50084954 |
| C | -3.58229645 | -2.12760838 | 7.50085101 |
| C | -4.09291555 | -0.77995782 | 7.50084954 |
| C | -3.63371113 | 2.03855554  | 7.50085101 |
| C | -2.72192107 | 3.15458993  | 7.50084954 |
| C | -0.05141468 | 4.16616392  | 7.50085101 |
| C | 1.37099449  | 3.93454776  | 7.50084954 |
| C | 3.58229645  | 2.12760838  | 7.50085101 |
| C | 4.09291555  | 0.77995782  | 7.50084954 |
| C | 2.12959092  | -3.58343992 | 8.75479587 |
| C | 0.77940026  | -4.09505896 | 8.75484636 |
| C | -2.03855454 | -3.63599980 | 8.75479587 |

|   |             |             |             |
|---|-------------|-------------|-------------|
| C | -3.15672496 | -2.72250990 | 8.75484636  |
| C | -4.16814547 | -0.05255988 | 8.75479587  |
| C | -3.93612522 | 1.37254906  | 8.75484636  |
| C | -2.12959092 | 3.58343992  | 8.75479587  |
| C | -0.77940026 | 4.09505896  | 8.75484636  |
| C | 2.03855454  | 3.63599980  | 8.75479587  |
| C | 3.15672496  | 2.72250990  | 8.75484636  |
| C | 4.16814547  | 0.05255988  | 8.75479587  |
| C | 3.93612522  | -1.37254906 | 8.75484636  |
| C | 0.05482900  | -4.17191765 | 10.00245162 |
| C | -1.37582117 | -3.93897375 | 10.00251135 |
| C | -3.58557217 | -2.13344213 | 10.00245162 |
| C | -4.09916191 | -0.77799079 | 10.00251135 |
| C | -3.64040117 | 2.03847552  | 10.00245162 |
| C | -2.72334075 | 3.16098295  | 10.00251135 |
| C | -0.05482900 | 4.17191765  | 10.00245162 |
| C | 1.37582117  | 3.93897375  | 10.00251135 |
| C | 3.58557217  | 2.13344213  | 10.00245162 |
| C | 4.09916191  | 0.77799079  | 10.00251135 |
| C | 3.64040117  | -2.03847552 | 10.00245162 |
| C | 2.72334075  | -3.16098295 | 10.00251135 |
| C | -2.03834048 | -3.63432627 | 11.25141018 |
| C | -3.15503704 | -2.72203321 | 11.25135752 |
| C | -4.16658911 | -0.05190850 | 11.25141018 |
| C | -3.93486843 | 1.37132562  | 11.25135752 |
| C | -2.12824863 | 3.58241777  | 11.25141018 |
| C | -0.77983139 | 4.09335883  | 11.25135752 |
| C | 2.03834048  | 3.63432627  | 11.25141018 |
| C | 3.15503704  | 2.72203321  | 11.25135752 |
| C | 4.16658911  | 0.05190850  | 11.25141018 |
| C | 3.93486843  | -1.37132562 | 11.25135752 |
| C | 2.12824863  | -3.58241777 | 11.25141018 |
| C | 0.77983139  | -4.09335883 | 11.25135752 |
| C | -3.58251404 | -2.12844642 | 12.50593127 |
| C | -4.09344493 | -0.77977729 | 12.50585629 |
| C | -3.63454569 | 2.03832495  | 12.50593127 |
| C | -2.72202941 | 3.15513866  | 12.50585629 |
| C | -0.05203165 | 4.16677138  | 12.50593127 |
| C | 1.37141552  | 3.93491594  | 12.50585629 |
| C | 3.58251404  | 2.12844642  | 12.50593127 |
| C | 4.09344493  | 0.77977729  | 12.50585629 |
| C | 3.63454569  | -2.03832495 | 12.50593127 |
| C | 2.72202941  | -3.15513866 | 12.50585629 |
| C | 0.05203165  | -4.16677138 | 12.50593127 |
| C | -1.37141552 | -3.93491594 | 12.50585629 |
| C | -4.17228577 | -0.05499506 | 13.75451885 |
| C | -3.93915619 | 1.37610909  | 13.75456655 |
| C | -2.13377000 | 3.58580794  | 13.75451885 |
| C | -0.77783267 | 4.09946387  | 13.75456655 |
| C | 2.03851577  | 3.64080300  | 13.75451885 |
| C | 3.16132352  | 2.72335478  | 13.75456655 |
| C | 4.17228577  | 0.05499506  | 13.75451885 |
| C | 3.93915619  | -1.37610909 | 13.75456655 |
| C | 2.13377000  | -3.58580794 | 13.75451885 |
| C | 0.77783267  | -4.09946387 | 13.75456655 |
| C | -2.03851577 | -3.64080300 | 13.75451885 |
| C | -3.16132352 | -2.72335478 | 13.75456655 |
| C | -3.63550473 | 2.03871201  | 15.00213358 |
| C | -2.72221716 | 3.15629545  | 15.00219507 |
| C | -0.05217597 | 4.16779545  | 15.00213358 |
| C | 1.37232346  | 3.93565694  | 15.00219507 |
| C | 3.58332875  | 2.12908344  | 15.00213358 |
| C | 4.09454062  | 0.77936149  | 15.00219507 |
| C | 3.63550473  | -2.03871201 | 15.00213358 |
| C | 2.72221716  | -3.15629545 | 15.00219507 |
| C | 0.05217597  | -4.16779545 | 15.00213358 |
| C | -1.37232346 | -3.93565694 | 15.00219507 |
| C | -3.58332875 | -2.12908344 | 15.00213358 |
| C | -4.09454062 | -0.77936149 | 15.00219507 |
| C | -2.12694753 | 3.58228468  | 16.25692460 |

|   |             |             |             |
|---|-------------|-------------|-------------|
| C | -0.77975408 | 4.09252586  | 16.25704365 |
| C | 2.03887577  | 3.63313293  | 16.25692460 |
| C | 3.15435432  | 2.72154977  | 16.25704365 |
| C | 4.16582330  | 0.05084825  | 16.25692460 |
| C | 3.93410840  | -1.37097609 | 16.25704365 |
| C | 2.12694753  | -3.58228468 | 16.25692460 |
| C | 0.77975408  | -4.09252586 | 16.25704365 |
| C | -2.03887577 | -3.63313293 | 16.25692460 |
| C | -3.15435432 | -2.72154977 | 16.25704365 |
| C | -4.16582330 | -0.05084825 | 16.25692460 |
| C | -3.93410840 | 1.37097609  | 16.25704365 |
| C | -0.05422546 | 4.17241947  | 17.50705801 |
| C | 1.37718802  | 3.93900813  | 17.50712222 |
| C | 3.58630853  | 2.13317036  | 17.50705801 |
| C | 4.09987511  | 0.77682425  | 17.50712222 |
| C | 3.64053398  | -2.03924911 | 17.50705801 |
| C | 2.72268709  | -3.16218387 | 17.50712222 |
| C | 0.05422546  | -4.17241947 | 17.50705801 |
| C | -1.37718802 | -3.93900813 | 17.50712222 |
| C | -3.58630853 | -2.13317036 | 17.50705801 |
| C | -4.09987511 | -0.77682425 | 17.50712222 |
| C | -3.64053398 | 2.03924911  | 17.50705801 |
| C | -2.72268709 | 3.16218387  | 17.50712222 |
| C | 2.03990500  | 3.63636420  | 18.75317037 |
| C | 3.15874488  | 2.72156954  | 18.75329262 |
| C | 4.16913627  | 0.05157255  | 18.75317037 |
| C | 3.93632080  | -1.37476854 | 18.75329262 |
| C | 2.12923127  | -3.58479165 | 18.75317037 |
| C | 0.77757592  | -4.09633808 | 18.75329262 |
| C | -2.03990500 | -3.63636420 | 18.75317037 |
| C | -3.15874488 | -2.72156954 | 18.75329262 |
| C | -4.16913627 | -0.05157255 | 18.75317037 |
| C | -3.93632080 | 1.37476854  | 18.75329262 |
| C | -2.12923127 | 3.58479165  | 18.75317037 |
| C | -0.77757592 | 4.09633808  | 18.75329262 |
| C | 3.58279762  | 2.12413647  | 20.00789547 |
| C | 4.09172645  | 0.77900003  | 20.00797824 |
| C | 3.63095496  | -2.04072552 | 20.00789547 |
| C | 2.72049704  | -3.15403903 | 20.00797824 |
| C | 0.04815734  | -4.16486199 | 20.00789547 |
| C | -1.37122940 | -3.93303907 | 20.00797824 |
| C | -3.58279762 | -2.12413647 | 20.00789547 |
| C | -4.09172645 | -0.77900003 | 20.00797824 |
| C | -3.63095496 | 2.04072552  | 20.00789547 |
| C | -2.72049704 | 3.15403903  | 20.00797824 |
| C | -0.04815734 | 4.16486199  | 20.00789547 |
| C | 1.37122940  | 3.93303907  | 20.00797824 |
| C | 4.17148690  | 0.05264585  | 21.26022057 |
| C | 3.93745801  | -1.37830266 | 21.26032621 |
| C | 2.13133610  | -3.58629070 | 21.26022057 |
| C | 0.77508388  | -4.09908999 | 21.26032621 |
| C | -2.04015081 | -3.63893656 | 21.26022057 |
| C | -3.16237412 | -2.72078733 | 21.26032621 |
| C | -4.17148690 | -0.05264585 | 21.26022057 |
| C | -3.93745801 | 1.37830266  | 21.26032621 |
| C | -2.13133610 | 3.58629070  | 21.26022057 |
| C | -0.77508388 | 4.09908999  | 21.26032621 |
| C | 2.04015081  | 3.63893656  | 21.26022057 |
| C | 3.16237412  | 2.72078733  | 21.26032621 |
| C | 3.63307391  | -2.03798055 | 22.50399613 |
| C | 2.71692033  | -3.15770705 | 22.50404810 |
| C | 0.05159403  | -4.16532457 | 22.50399613 |
| C | -1.37619436 | -3.93177555 | 22.50404810 |
| C | -3.58147988 | -2.12734403 | 22.50399613 |
| C | -4.09311469 | -0.77406850 | 22.50404810 |
| C | -3.63307391 | 2.03798055  | 22.50399613 |
| C | -2.71692033 | 3.15770705  | 22.50404810 |
| C | -0.05159403 | 4.16532457  | 22.50399613 |
| C | 1.37619436  | 3.93177555  | 22.50404810 |
| C | 3.58147988  | 2.12734403  | 22.50399613 |

|   |             |             |              |
|---|-------------|-------------|--------------|
| C | 4.09311469  | 0.77406850  | 22.50404810  |
| C | 2.11367906  | -3.56997735 | 23.75824304  |
| C | 0.77596567  | -4.07549105 | 23.75821690  |
| C | -2.03485155 | -3.61548844 | 23.75824304  |
| C | -3.14149595 | -2.70975151 | 23.75821690  |
| C | -4.14853061 | -0.04551109 | 23.75824304  |
| C | -3.91746162 | 1.36573954  | 23.75821690  |
| C | -2.11367906 | 3.56997735  | 23.75824304  |
| C | -0.77596567 | 4.07549105  | 23.75821690  |
| C | 2.03485155  | 3.61548844  | 23.75824304  |
| C | 3.14149595  | 2.70975151  | 23.75821690  |
| C | 4.14853061  | 0.04551109  | 23.75824304  |
| C | 3.91746162  | -1.36573954 | 23.75821690  |
| C | 0.05420788  | -4.16096355 | 25.01925237  |
| C | -1.37886148 | -3.92636803 | 25.01922101  |
| C | -3.57639620 | -2.12742717 | 25.01925237  |
| C | -4.08976520 | -0.76905494 | 25.01922101  |
| C | -3.63060407 | 2.03353637  | 25.01925237  |
| C | -2.71090372 | 3.15731309  | 25.01922101  |
| C | -0.05420788 | 4.16096355  | 25.01925237  |
| C | 1.37886148  | 3.92636803  | 25.01922101  |
| C | 3.57639620  | 2.12742717  | 25.01925237  |
| C | 4.08976520  | 0.76905494  | 25.01922101  |
| C | 3.63060407  | -2.03353637 | 25.01925237  |
| C | 2.71090372  | -3.15731309 | 25.01922101  |
| C | -2.05854799 | -3.67394420 | 26.25959241  |
| C | -3.19512459 | -2.74342561 | 26.25959231  |
| C | -4.21100300 | -0.05421725 | 26.25959241  |
| C | -3.97343857 | 1.39534625  | 26.25959231  |
| C | -2.15245501 | 3.61972695  | 26.25959241  |
| C | -0.77831398 | 4.13877187  | 26.25959231  |
| C | 2.05854799  | 3.67394420  | 26.25959241  |
| C | 3.19512459  | 2.74342561  | 26.25959231  |
| C | 4.21100300  | 0.05421725  | 26.25959241  |
| C | 3.97343857  | -1.39534625 | 26.25959231  |
| C | 2.15245501  | -3.61972695 | 26.25959241  |
| C | 0.77831398  | -4.13877187 | 26.25959231  |
| C | -3.69627450 | -2.13558794 | 27.47546582  |
| C | -4.18521070 | -0.84135501 | 27.47552724  |
| C | -3.69761066 | 2.13327365  | 27.47546582  |
| C | -2.82124016 | 3.20382129  | 27.47552724  |
| C | -0.00133616 | 4.26886159  | 27.47546582  |
| C | 1.36397054  | 4.04517629  | 27.47552724  |
| C | 3.69627450  | 2.13558794  | 27.47546582  |
| C | 4.18521070  | 0.84135501  | 27.47552724  |
| C | 3.69761066  | -2.13327365 | 27.47546582  |
| C | 2.82124016  | -3.20382129 | 27.47552724  |
| C | 0.00133616  | -4.26886159 | 27.47546582  |
| C | -1.36397054 | -4.04517629 | 27.47552724  |
| H | -0.51917201 | 4.41999481  | -28.43143113 |
| H | 1.90276611  | 4.02327224  | -28.43152333 |
| H | 3.56824179  | 2.65961355  | -28.43143113 |
| H | 4.43563902  | 0.36379234  | -28.43152333 |
| H | 4.08741380  | -1.76038126 | -28.43143113 |
| H | 2.53287292  | -3.65947991 | -28.43152333 |
| H | 0.51917201  | -4.41999481 | -28.43143113 |
| H | -1.90276611 | -4.02327224 | -28.43152333 |
| H | -3.56824179 | -2.65961355 | -28.43143113 |
| H | -4.43563902 | -0.36379234 | -28.43152333 |
| H | -4.08741380 | 1.76038126  | -28.43143113 |
| H | -2.53287292 | 3.65947991  | -28.43152333 |
| H | -3.56824179 | -2.65961355 | 28.43143113  |
| H | -4.43563902 | -0.36379234 | 28.43152333  |
| H | -4.08741380 | 1.76038126  | 28.43143113  |
| H | -2.53287292 | 3.65947991  | 28.43152333  |
| H | -0.51917201 | 4.41999481  | 28.43143113  |
| H | 1.90276611  | 4.02327224  | 28.43152333  |
| H | 3.56824179  | 2.65961355  | 28.43143113  |
| H | 4.43563902  | 0.36379234  | 28.43152333  |
| H | 4.08741380  | -1.76038126 | 28.43143113  |

|   |             |             |             |
|---|-------------|-------------|-------------|
| H | 2.53287292  | -3.65947991 | 28.43152333 |
| H | 0.51917201  | -4.41999481 | 28.43143113 |
| H | -1.90276611 | -4.02327224 | 28.43152333 |

Nanotube (6,6) u23v0s  
B3LYP/STO-3G Energy: -20795.634295

|   |              |              |               |
|---|--------------|--------------|---------------|
| C | -0.007260240 | 4.267432390  | -28.108490280 |
| C | 1.356659800  | 4.046041440  | -28.108406050 |
| C | 3.692074740  | 2.140003750  | -28.108490280 |
| C | 4.182304570  | 0.848118870  | -28.108406050 |
| C | 3.699334980  | -2.127428640 | -28.108490280 |
| C | 2.825644780  | -3.197922570 | -28.108406050 |
| C | 0.007260240  | -4.267432390 | -28.108490280 |
| C | -1.356659800 | -4.046041440 | -28.108406050 |
| C | -3.692074740 | -2.140003750 | -28.108490280 |
| C | -4.182304570 | -0.848118870 | -28.108406050 |
| C | -3.699334980 | 2.127428640  | -28.108490280 |
| C | -2.825644780 | 3.197922570  | -28.108406050 |
| C | 2.052658650  | 3.674618390  | -26.891254250 |
| C | 3.188644720  | 2.747506270  | -26.891135610 |
| C | 4.208642200  | 0.059654660  | -26.891254250 |
| C | 3.973732580  | -1.387694200 | -26.891135610 |
| C | 2.155983550  | -3.614963730 | -26.891254250 |
| C | 0.785087860  | -4.135200470 | -26.891135610 |
| C | -2.052658650 | -3.674618390 | -26.891254250 |
| C | -3.188644720 | -2.747506270 | -26.891135610 |
| C | -4.208642200 | -0.059654660 | -26.891254250 |
| C | -3.973732580 | 1.387694200  | -26.891135610 |
| C | -2.155983550 | 3.614963730  | -26.891254250 |
| C | -0.785087860 | 4.135200470  | -26.891135610 |
| C | 3.574259780  | 2.133352510  | -25.650500720 |
| C | 4.089686840  | 0.775020880  | -25.650443440 |
| C | 3.634667360  | -2.028723520 | -25.650500720 |
| C | 2.716031190  | -3.154262260 | -25.650443440 |
| C | 0.060407580  | -4.162076030 | -25.650500720 |
| C | -1.373655650 | -3.929283130 | -25.650443440 |
| C | -3.574259780 | -2.133352510 | -25.650500720 |
| C | -4.089686840 | -0.775020880 | -25.650443440 |
| C | -3.634667360 | 2.028723520  | -25.650500720 |
| C | -2.716031190 | 3.154262260  | -25.650443440 |
| C | -0.060407580 | 4.162076030  | -25.650500720 |
| C | 1.373655650  | 3.929283130  | -25.650443440 |
| C | 4.148303450  | 0.050886940  | -24.390603390 |
| C | 3.919269940  | -1.360273020 | -24.390584210 |
| C | 2.118221100  | -3.567092700 | -24.390603390 |
| C | 0.781603980  | -4.074323840 | -24.390584210 |
| C | -2.030082350 | -3.617979640 | -24.390603390 |
| C | -3.137665960 | -2.714050820 | -24.390584210 |
| C | -4.148303450 | -0.050886940 | -24.390603390 |
| C | -3.919269940 | 1.360273020  | -24.390584210 |
| C | -2.118221100 | 3.567092700  | -24.390603390 |
| C | -0.781603980 | 4.074323840  | -24.390584210 |
| C | 2.030082350  | 3.617979640  | -24.390603390 |
| C | 3.137665960  | 2.714050820  | -24.390584210 |
| C | 3.632750040  | -2.032976460 | -23.135071390 |
| C | 2.719857370  | -3.151597130 | -23.135031960 |
| C | 0.055765760  | -4.162542050 | -23.135071390 |
| C | -1.369434490 | -3.931264140 | -23.135031960 |
| C | -3.576984280 | -2.129565590 | -23.135071390 |
| C | -4.089291860 | -0.779667010 | -23.135031960 |
| C | -3.632750040 | 2.032976460  | -23.135071390 |
| C | -2.719857370 | 3.151597130  | -23.135031960 |
| C | -0.055765760 | 4.162542050  | -23.135071390 |
| C | 1.369434490  | 3.931264140  | -23.135031960 |
| C | 3.576984280  | 2.129565590  | -23.135071390 |
| C | 4.089291860  | 0.779667010  | -23.135031960 |
| C | 2.134996610  | -3.582844710 | -21.890480750 |

|   |              |              |               |
|---|--------------|--------------|---------------|
| C | 0.779494260  | -4.097246400 | -21.890487860 |
| C | -2.035336230 | -3.640383650 | -21.890480750 |
| C | -3.158572340 | -2.723685030 | -21.890487860 |
| C | -4.170332840 | -0.057538950 | -21.890480750 |
| C | -3.938066600 | 1.373561370  | -21.890487860 |
| C | -2.134996610 | 3.582844710  | -21.890480750 |
| C | -0.779494260 | 4.097246400  | -21.890487860 |
| C | 2.035336230  | 3.640383650  | -21.890480750 |
| C | 3.158572340  | 2.723685030  | -21.890487860 |
| C | 4.170332840  | 0.057538950  | -21.890480750 |
| C | 3.938066600  | -1.373561370 | -21.890487860 |
| C | 0.052623570  | -4.163820760 | -20.639382670 |
| C | -1.366874740 | -3.933445230 | -20.639407240 |
| C | -3.579662770 | -2.127483730 | -20.639382670 |
| C | -4.089900870 | -0.782974360 | -20.639407240 |
| C | -3.632286340 | 2.036337030  | -20.639382670 |
| C | -2.723026120 | 3.150470870  | -20.639407240 |
| C | -0.052623570 | 4.163820760  | -20.639382670 |
| C | 1.366874740  | 3.933445230  | -20.639407240 |
| C | 3.579662770  | 2.127483730  | -20.639382670 |
| C | 4.089900870  | 0.782974360  | -20.639407240 |
| C | 3.632286340  | -2.036337030 | -20.639382670 |
| C | 2.723026120  | -3.150470870 | -20.639407240 |
| C | -2.036177980 | -3.635186340 | -19.383674290 |
| C | -3.153367960 | -2.723446280 | -19.383633540 |
| C | -4.166252710 | -0.054211320 | -19.383674290 |
| C | -3.935257640 | 1.369173620  | -19.383633540 |
| C | -2.130074730 | 3.580975020  | -19.383674290 |
| C | -0.781889680 | 4.092619900  | -19.383633540 |
| C | 2.036177980  | 3.635186340  | -19.383674290 |
| C | 3.153367960  | 2.723446280  | -19.383633540 |
| C | 4.166252710  | 0.054211320  | -19.383674290 |
| C | 3.935257640  | -1.369173620 | -19.383633540 |
| C | 2.130074730  | -3.580975020 | -19.383674290 |
| C | 0.781889680  | -4.092619900 | -19.383633540 |
| C | -3.583671070 | -2.135364620 | -18.136095380 |
| C | -4.098105720 | -0.779764040 | -18.136102510 |
| C | -3.641115540 | 2.035867880  | -18.136095380 |
| C | -2.724348330 | 3.159181640  | -18.136102510 |
| C | -0.057444470 | 4.171232500  | -18.136095380 |
| C | 1.373757390  | 3.938945680  | -18.136102510 |
| C | 3.583671070  | 2.135364620  | -18.136095380 |
| C | 4.098105720  | 0.779764040  | -18.136102510 |
| C | 3.641115540  | -2.035867880 | -18.136095380 |
| C | 2.724348330  | -3.159181640 | -18.136102510 |
| C | 0.057444470  | -4.171232500 | -18.136095380 |
| C | -1.373757390 | -3.938945680 | -18.136102510 |
| C | -4.164826520 | -0.054050250 | -16.887487570 |
| C | -3.933948680 | 1.368518010  | -16.887500000 |
| C | -2.129222150 | 3.579820440  | -16.887487570 |
| C | -0.781802980 | 4.091158500  | -16.887500000 |
| C | 2.035604370  | 3.633870690  | -16.887487570 |
| C | 3.152145700  | 2.722640490  | -16.887500000 |
| C | 4.164826520  | 0.054050250  | -16.887487570 |
| C | 3.933948680  | -1.368518010 | -16.887500000 |
| C | 2.129222150  | -3.579820440 | -16.887487570 |
| C | 0.781802980  | -4.091158500 | -16.887500000 |
| C | -2.035604370 | -3.633870690 | -16.887487570 |
| C | -3.152145700 | -2.722640490 | -16.887500000 |
| C | -3.632855190 | 2.035616870  | -15.632249890 |
| C | -2.722482840 | 3.151171770  | -15.632328130 |
| C | -0.053531670 | 4.163953320  | -15.632249890 |
| C | 1.367753390  | 3.933325190  | -15.632328130 |
| C | 3.579323520  | 2.128336440  | -15.632249890 |
| C | 4.090236230  | 0.782153410  | -15.632328130 |
| C | 3.632855190  | -2.035616870 | -15.632249890 |
| C | 2.722482840  | -3.151171770 | -15.632328130 |
| C | 0.053531670  | -4.163953320 | -15.632249890 |
| C | -1.367753390 | -3.933325190 | -15.632328130 |
| C | -3.579323520 | -2.128336440 | -15.632249890 |



|   |              |              |               |
|---|--------------|--------------|---------------|
| C | -4.090236230 | -0.782153410 | -15.632328130 |
| C | -2.134616000 | 3.583431620  | -14.382417390 |
| C | -0.780197020 | 4.097430590  | -14.382438470 |
| C | 2.036034820  | 3.640347490  | -14.382417390 |
| C | 3.158380470  | 2.724385730  | -14.382438470 |
| C | 4.170650820  | 0.056915870  | -14.382417390 |
| C | 3.938577490  | -1.373044850 | -14.382438470 |
| C | 2.134616000  | -3.583431620 | -14.382417390 |
| C | 0.780197020  | -4.097430590 | -14.382438470 |
| C | -2.036034820 | -3.640347490 | -14.382417390 |
| C | -3.158380470 | -2.724385730 | -14.382438470 |
| C | -4.170650820 | -0.056915870 | -14.382417390 |
| C | -3.938577490 | 1.373044850  | -14.382438470 |
| C | -0.054867640 | 4.167613220  | -13.134923750 |
| C | 1.370184440  | 3.936318040  | -13.134966350 |
| C | 3.581825100  | 2.131323380  | -13.134923750 |
| C | 4.094043640  | 0.781544490  | -13.134966350 |
| C | 3.636692740  | -2.036289840 | -13.134923750 |
| C | 2.723859200  | -3.154773550 | -13.134966350 |
| C | 0.054867640  | -4.167613220 | -13.134923750 |
| C | -1.370184440 | -3.936318040 | -13.134966350 |
| C | -3.581825100 | -2.131323380 | -13.134923750 |
| C | -4.094043640 | -0.781544490 | -13.134966350 |
| C | -3.636692740 | 2.036289840  | -13.134923750 |
| C | -2.723859200 | 3.154773550  | -13.134966350 |
| C | 2.035944050  | 3.632689920  | -11.880699400 |
| C | 3.150998790  | 2.722707800  | -11.880747960 |
| C | 4.163973780  | 0.053165690  | -11.880699400 |
| C | 3.933433520  | -1.367491100 | -11.880747960 |
| C | 2.128029730  | -3.579524230 | -11.880699400 |
| C | 0.782434730  | -4.090198900 | -11.880747960 |
| C | -2.035944050 | -3.632689920 | -11.880699400 |
| C | -3.150998790 | -2.722707800 | -11.880747960 |
| C | -4.163973780 | -0.053165690 | -11.880699400 |
| C | -3.933433520 | 1.367491100  | -11.880747960 |
| C | -2.128029730 | 3.579524230  | -11.880699400 |
| C | -0.782434730 | 4.090198900  | -11.880747960 |
| C | 3.582449760  | 2.133263350  | -10.629022860 |
| C | 4.095830440  | 0.780459300  | -10.629104510 |
| C | 3.638685130  | -2.035860830 | -10.629022860 |
| C | 2.723812800  | -3.156863570 | -10.629104510 |
| C | 0.056235370  | -4.169124180 | -10.629022860 |
| C | -1.372017640 | -3.937322860 | -10.629104510 |
| C | -3.582449760 | -2.133263350 | -10.629022860 |
| C | -4.095830440 | -0.780459300 | -10.629104510 |
| C | -3.638685130 | 2.035860830  | -10.629022860 |
| C | -2.723812800 | 3.156863570  | -10.629104510 |
| C | -0.056235370 | 4.169124180  | -10.629022860 |
| C | 1.372017640  | 3.937322860  | -10.629104510 |
| C | 4.168738660  | 0.055803180  | -9.382116870  |
| C | 3.937094270  | -1.371437620 | -9.382137810  |
| C | 2.132696310  | -3.582331990 | -9.382116870  |
| C | 0.780847320  | -4.095342460 | -9.382137810  |
| C | -2.036042360 | -3.638135180 | -9.382116870  |
| C | -3.156246950 | -2.723904850 | -9.382137810  |
| C | -4.168738660 | -0.055803180 | -9.382116870  |
| C | -3.937094270 | 1.371437620  | -9.382137810  |
| C | -2.132696310 | 3.582331990  | -9.382116870  |
| C | -0.780847320 | 4.095342460  | -9.382137810  |
| C | 2.036042360  | 3.638135180  | -9.382116870  |
| C | 3.156246950  | 2.723904850  | -9.382137810  |
| C | 3.633117370  | -2.036132750 | -8.129832890  |
| C | 2.723040580  | -3.151339260 | -8.129802420  |
| C | 0.053216000  | -4.164438310 | -8.129832890  |
| C | -1.367619570 | -3.933891940 | -8.129802420  |
| C | -3.579901370 | -2.128305570 | -8.129832890  |
| C | -4.090660140 | -0.782552680 | -8.129802420  |
| C | -3.633117370 | 2.036132750  | -8.129832890  |
| C | -2.723040580 | 3.151339260  | -8.129802420  |
| C | -0.053216000 | 4.164438310  | -8.129832890  |

|   |              |              |              |
|---|--------------|--------------|--------------|
| C | 1.367619570  | 3.933891940  | -8.129802420 |
| C | 3.579901370  | 2.128305570  | -8.129832890 |
| C | 4.090660140  | 0.782552680  | -8.129802420 |
| C | 2.132129350  | -3.582243070 | -6.877173120 |
| C | 0.781219050  | -4.094907810 | -6.877155530 |
| C | -2.036248820 | -3.637599720 | -6.877173120 |
| C | -3.155684660 | -2.724009440 | -6.877155530 |
| C | -4.168378180 | -0.055356650 | -6.877173120 |
| C | -3.936903710 | 1.370898360  | -6.877155530 |
| C | -2.132129350 | 3.582243070  | -6.877173120 |
| C | -0.781219050 | 4.094907810  | -6.877155530 |
| C | 2.036248820  | 3.637599720  | -6.877173120 |
| C | 3.155684660  | 2.724009440  | -6.877155530 |
| C | 4.168378180  | 0.055356650  | -6.877173120 |
| C | 3.936903710  | -1.370898360 | -6.877155530 |
| C | 0.056313570  | -4.169868470 | -5.630033670 |
| C | -1.372304100 | -3.937942290 | -5.630008080 |
| C | -3.583055240 | -2.133703220 | -5.630033670 |
| C | -4.096510110 | -0.780520930 | -5.630008080 |
| C | -3.639368810 | 2.036165250  | -5.630033670 |
| C | -2.724206010 | 3.157421350  | -5.630008080 |
| C | -0.056313570 | 4.169868470  | -5.630033670 |
| C | 1.372304100  | 3.937942290  | -5.630008080 |
| C | 3.583055240  | 2.133703220  | -5.630033670 |
| C | 4.096510110  | 0.780520930  | -5.630008080 |
| C | 3.639368810  | -2.036165250 | -5.630033670 |
| C | 2.724206010  | -3.157421350 | -5.630008080 |
| C | -2.036218150 | -3.633722690 | -4.378959680 |
| C | -3.151983110 | -2.723212740 | -4.378947480 |
| C | -4.165005230 | -0.053444700 | -4.378959680 |
| C | -3.934362970 | 1.368091070  | -4.378947480 |
| C | -2.128787080 | 3.580277990  | -4.378959680 |
| C | -0.782379860 | 4.091303810  | -4.378947480 |
| C | 2.036218150  | 3.633722690  | -4.378959680 |
| C | 3.151983110  | 2.723212740  | -4.378947480 |
| C | 4.165005230  | 0.053444700  | -4.378959680 |
| C | 3.934362970  | -1.368091070 | -4.378947480 |
| C | 2.128787080  | -3.580277990 | -4.378959680 |
| C | 0.782379860  | -4.091303810 | -4.378947480 |
| C | -3.581568040 | -2.130992230 | -3.125084700 |
| C | -4.093711130 | -0.781668430 | -3.125154160 |
| C | -3.636277430 | 2.036232790  | -3.125084700 |
| C | -2.723800290 | 3.154423620  | -3.125154160 |
| C | -0.054709390 | 4.167225020  | -3.125084700 |
| C | 1.369910850  | 3.936092050  | -3.125154160 |
| C | 3.581568040  | 2.130992230  | -3.125084700 |
| C | 4.093711130  | 0.781668430  | -3.125154160 |
| C | 3.636277430  | -2.036232790 | -3.125084700 |
| C | 2.723800290  | -3.154423620 | -3.125154160 |
| C | 0.054709390  | -4.167225020 | -3.125084700 |
| C | -1.369910850 | -3.936092050 | -3.125154160 |
| C | -4.170698920 | -0.056774770 | -1.876773250 |
| C | -3.938605800 | 1.372882320  | -1.876860920 |
| C | -2.134517850 | 3.583543830  | -1.876773250 |
| C | -0.780351940 | 4.097373840  | -1.876860920 |
| C | 2.036181070  | 3.640318600  | -1.876773250 |
| C | 3.158253860  | 2.724491520  | -1.876860920 |
| C | 4.170698920  | 0.056774770  | -1.876773250 |
| C | 3.938605800  | -1.372882320 | -1.876860920 |
| C | 2.134517850  | -3.583543830 | -1.876773250 |
| C | 0.780351940  | -4.097373840 | -1.876860920 |
| C | -2.036181070 | -3.640318600 | -1.876773250 |
| C | -3.158253860 | -2.724491520 | -1.876860920 |
| C | -3.634932670 | 2.036229930  | -0.627203320 |
| C | -2.723442500 | 3.153056360  | -0.627218300 |
| C | -0.054039490 | 4.166059000  | -0.627203320 |
| C | 1.368905660  | 3.935098580  | -0.627218300 |
| C | 3.580893180  | 2.129829070  | -0.627203320 |
| C | 4.092348160  | 0.782042210  | -0.627218300 |
| C | 3.634932670  | -2.036229930 | -0.627203320 |

|   |              |              |              |
|---|--------------|--------------|--------------|
| C | 2.723442500  | -3.153056360 | -0.627218300 |
| C | 0.054039490  | -4.166059000 | -0.627203320 |
| C | -1.368905660 | -3.935098580 | -0.627218300 |
| C | -3.580893180 | -2.129829070 | -0.627203320 |
| C | -4.092348160 | -0.782042210 | -0.627218300 |
| C | -2.129791890 | 3.580854220  | 0.627224520  |
| C | -0.782028680 | 4.092404750  | 0.627228790  |
| C | 2.036214780  | 3.634880990  | 0.627224520  |
| C | 3.153112130  | 2.723459080  | 0.627228790  |
| C | 4.166006660  | 0.054026770  | 0.627224520  |
| C | 3.935140820  | -1.368945670 | 0.627228790  |
| C | 2.129791890  | -3.580854220 | 0.627224520  |
| C | 0.782028680  | -4.092404750 | 0.627228790  |
| C | -2.036214780 | -3.634880990 | 0.627224520  |
| C | -3.153112130 | -2.723459080 | 0.627228790  |
| C | -4.166006660 | -0.054026770 | 0.627224520  |
| C | -3.935140820 | 1.368945670  | 0.627228790  |
| C | -0.056711010 | 4.170640990  | 1.876861900  |
| C | 1.372963640  | 3.938641260  | 1.876781170  |
| C | 3.583525540  | 2.134433670  | 1.876861900  |
| C | 4.097445210  | 0.780299240  | 1.876781170  |
| C | 3.640236550  | -2.036207320 | 1.876861900  |
| C | 2.724481560  | -3.158342020 | 1.876781170  |
| C | 0.056711010  | -4.170640990 | 1.876861900  |
| C | -1.372963640 | -3.938641260 | 1.876781170  |
| C | -3.583525540 | -2.134433670 | 1.876861900  |
| C | -4.097445210 | -0.780299240 | 1.876781170  |
| C | -3.640236550 | 2.036207320  | 1.876861900  |
| C | -2.724481560 | 3.158342020  | 1.876781170  |
| C | 2.036305770  | 3.636293250  | 3.125172190  |
| C | 3.154412900  | 2.723741000  | 3.125088300  |
| C | 4.167275220  | 0.054654100  | 3.125172190  |
| C | 3.936035350  | -1.369931200 | 3.125088300  |
| C | 2.130969450  | -3.581639160 | 3.125172190  |
| C | 0.781622450  | -4.093672200 | 3.125088300  |
| C | -2.036305770 | -3.636293250 | 3.125172190  |
| C | -3.154412900 | -2.723741000 | 3.125088300  |
| C | -4.167275220 | -0.054654100 | 3.125172190  |
| C | -3.936035350 | 1.369931200  | 3.125088300  |
| C | -2.130969450 | 3.581639160  | 3.125172190  |
| C | -0.781622450 | 4.093672200  | 3.125088300  |
| C | 3.580296530  | 2.128841110  | 4.378954840  |
| C | 4.091258970  | 0.782405640  | 4.378983560  |
| C | 3.633778750  | -2.036207200 | 4.378954840  |
| C | 2.723212650  | -3.151931380 | 4.378983560  |
| C | 0.053482210  | -4.165048300 | 4.378954840  |
| C | -1.368046320 | -3.934337020 | 4.378983560  |
| C | -3.580296530 | -2.128841110 | 4.378954840  |
| C | -4.091258970 | -0.782405640 | 4.378983560  |
| C | -3.633778750 | 2.036207200  | 4.378954840  |
| C | -2.723212650 | 3.151931380  | 4.378983560  |
| C | -0.053482210 | 4.165048300  | 4.378954840  |
| C | 1.368046320  | 3.934337020  | 4.378983560  |
| C | 4.169828730  | 0.056370240  | 5.630001150  |
| C | 3.938001860  | -1.372270670 | 5.630046370  |
| C | 2.133732430  | -3.582992490 | 5.630001150  |
| C | 0.780579670  | -4.096544990 | 5.630046370  |
| C | -2.036096310 | -3.639362730 | 5.630001150  |
| C | -3.157422190 | -2.724274320 | 5.630046370  |
| C | -4.169828730 | -0.056370240 | 5.630001150  |
| C | -3.938001860 | 1.372270670  | 5.630046370  |
| C | -2.133732430 | 3.582992490  | 5.630001150  |
| C | -0.780579670 | 4.096544990  | 5.630046370  |
| C | 2.036096310  | 3.639362730  | 5.630001150  |
| C | 3.157422190  | 2.724274320  | 5.630046370  |
| C | 3.637582010  | -2.036260220 | 6.877163040  |
| C | 2.724022060  | -3.155697070 | 6.877177690  |
| C | 0.055337930  | -4.168368540 | 6.877163040  |
| C | -1.370902800 | -3.936920840 | 6.877177690  |
| C | -3.582244090 | -2.132108320 | 6.877163040  |

|   |              |              |              |
|---|--------------|--------------|--------------|
| C | -4.094924860 | -0.781223770 | 6.877177690  |
| C | -3.637582010 | 2.036260220  | 6.877163040  |
| C | -2.724022060 | 3.155697070  | 6.877177690  |
| C | -0.055337930 | 4.168368540  | 6.877163040  |
| C | 1.370902800  | 3.936920840  | 6.877177690  |
| C | 3.582244090  | 2.132108320  | 6.877163040  |
| C | 4.094924860  | 0.781223770  | 6.877177690  |
| C | 2.128281760  | -3.579930980 | 8.129810280  |
| C | 0.782521400  | -4.090660940 | 8.129851380  |
| C | -2.036170290 | -3.633111560 | 8.129810280  |
| C | -3.151355590 | -2.723013880 | 8.129851380  |
| C | -4.164452050 | -0.053180580 | 8.129810280  |
| C | -3.933876990 | 1.367647060  | 8.129851380  |
| C | -2.128281760 | 3.579930980  | 8.129810280  |
| C | -0.782521400 | 4.090660940  | 8.129851380  |
| C | 2.036170290  | 3.633111560  | 8.129810280  |
| C | 3.151355590  | 2.723013880  | 8.129851380  |
| C | 4.164452050  | 0.053180580  | 8.129810280  |
| C | 3.933876990  | -1.367647060 | 8.129851380  |
| C | 0.055812110  | -4.168745900 | 9.382129160  |
| C | -1.371436870 | -3.937094280 | 9.382131490  |
| C | -3.582333800 | -2.132707660 | 9.382129160  |
| C | -4.095342100 | -0.780847970 | 9.382131490  |
| C | -3.638145910 | 2.036038240  | 9.382129160  |
| C | -2.723905230 | 3.156246310  | 9.382131490  |
| C | -0.055812110 | 4.168745900  | 9.382129160  |
| C | 1.371436870  | 3.937094280  | 9.382131490  |
| C | 3.582333800  | 2.132707660  | 9.382129160  |
| C | 4.095342100  | 0.780847970  | 9.382131490  |
| C | 3.638145910  | -2.036038240 | 9.382129160  |
| C | 2.723905230  | -3.156246310 | 9.382131490  |
| C | -2.035831680 | -3.638708190 | 10.629094540 |
| C | -3.156827490 | -2.723858200 | 10.629024110 |
| C | -4.169129570 | -0.056272140 | 10.629094540 |
| C | -3.937344150 | 1.371963700  | 10.629024110 |
| C | -2.133297890 | 3.582436050  | 10.629094540 |
| C | -0.780516650 | 4.095821910  | 10.629024110 |
| C | 2.035831680  | 3.638708190  | 10.629094540 |
| C | 3.156827490  | 2.723858200  | 10.629024110 |
| C | 4.169129570  | 0.056272140  | 10.629094540 |
| C | 3.937344150  | -1.371963700 | 10.629024110 |
| C | 2.133297890  | -3.582436050 | 10.629094540 |
| C | 0.780516650  | -4.095821910 | 10.629024110 |
| C | -3.579509800 | -2.128062970 | 11.880745080 |
| C | -4.090194320 | -0.782483630 | 11.880713420 |
| C | -3.632711490 | 2.035914930  | 11.880745080 |
| C | -2.722747870 | 3.150970370  | 11.880713420 |
| C | -0.053201690 | 4.163977900  | 11.880745080 |
| C | 1.367446460  | 3.933454010  | 11.880713420 |
| C | 3.579509800  | 2.128062970  | 11.880745080 |
| C | 4.090194320  | 0.782483630  | 11.880713420 |
| C | 3.632711490  | -2.035914930 | 11.880745080 |
| C | 2.722747870  | -3.150970370 | 11.880713420 |
| C | 0.053201690  | -4.163977900 | 11.880745080 |
| C | -1.367446460 | -3.933454010 | 11.880713420 |
| C | -4.167609350 | -0.054868250 | 13.134957280 |
| C | -3.936328160 | 1.370198980  | 13.134930670 |
| C | -2.131321970 | 3.581821440  | 13.134957280 |
| C | -0.781536960 | 4.094059680  | 13.134930670 |
| C | 2.036287370  | 3.636689690  | 13.134957280 |
| C | 3.154791210  | 2.723860700  | 13.134930670 |
| C | 4.167609350  | 0.054868250  | 13.134957280 |
| C | 3.936328160  | -1.370198980 | 13.134930670 |
| C | 2.131321970  | -3.581821440 | 13.134957280 |
| C | 0.781536960  | -4.094059680 | 13.134930670 |
| C | -2.036287370 | -3.636689690 | 13.134957280 |
| C | -3.154791210 | -2.723860700 | 13.134930670 |
| C | -3.640324040 | 2.036087550  | 14.382434230 |
| C | -2.724358160 | 3.158416600  | 14.382409310 |
| C | -0.056858480 | 4.170656870  | 14.382434230 |

|   |              |              |              |
|---|--------------|--------------|--------------|
| C | 1.373089930  | 3.938571670  | 14.382409310 |
| C | 3.583465560  | 2.134569330  | 14.382434230 |
| C | 4.097448090  | 0.780155070  | 14.382409310 |
| C | 3.640324040  | -2.036087550 | 14.382434230 |
| C | 2.724358160  | -3.158416600 | 14.382409310 |
| C | 0.056858480  | -4.170656870 | 14.382434230 |
| C | -1.373089930 | -3.938571670 | 14.382409310 |
| C | -3.583465560 | -2.134569330 | 14.382434230 |
| C | -4.097448090 | -0.780155070 | 14.382409310 |
| C | -2.128293820 | 3.579360140  | 15.632330510 |
| C | -0.782122820 | 4.090247020  | 15.632258020 |
| C | 2.035669900  | 3.632836590  | 15.632330510 |
| C | 3.151196410  | 2.722461740  | 15.632258020 |
| C | 4.163963720  | 0.053476450  | 15.632330510 |
| C | 3.933319230  | -1.367785270 | 15.632258020 |
| C | 2.128293820  | -3.579360140 | 15.632330510 |
| C | 0.782122820  | -4.090247020 | 15.632258020 |
| C | -2.035669900 | -3.632836590 | 15.632330510 |
| C | -3.151196410 | -2.722461740 | 15.632258020 |
| C | -4.163963720 | -0.053476450 | 15.632330510 |
| C | -3.933319230 | 1.367785270  | 15.632258020 |
| C | -0.054031750 | 4.164830430  | 16.887474050 |
| C | 1.368541190  | 3.933950080  | 16.887511190 |
| C | 3.579833080  | 2.129208080  | 16.887474050 |
| C | 4.091171310  | 0.781783600  | 16.887511190 |
| C | 3.633864830  | -2.035622350 | 16.887474050 |
| C | 2.722630110  | -3.152166480 | 16.887511190 |
| C | 0.054031750  | -4.164830430 | 16.887474050 |
| C | -1.368541190 | -3.933950080 | 16.887511190 |
| C | -3.579833080 | -2.129208080 | 16.887474050 |
| C | -4.091171310 | -0.781783600 | 16.887511190 |
| C | -3.633864830 | 2.035622350  | 16.887474050 |
| C | -2.722630110 | 3.152166480  | 16.887511190 |
| C | 2.035877110  | 3.641120400  | 18.136081530 |
| C | 3.159188540  | 2.724353910  | 18.136089800 |
| C | 4.171241320  | 0.057438900  | 18.136081530 |
| C | 3.938953970  | -1.373760580 | 18.136089800 |
| C | 2.135364210  | -3.583681500 | 18.136081530 |
| C | 0.779765420  | -4.098114490 | 18.136089800 |
| C | -2.035877110 | -3.641120400 | 18.136081530 |
| C | -3.159188540 | -2.724353910 | 18.136089800 |
| C | -4.171241320 | -0.057438900 | 18.136081530 |
| C | -3.938953970 | 1.373760580  | 18.136089800 |
| C | -2.135364210 | 3.583681500  | 18.136081530 |
| C | -0.779765420 | 4.098114490  | 18.136089800 |
| C | 3.580974800  | 2.130078320  | 19.383647050 |
| C | 4.092631790  | 0.781919500  | 19.383661990 |
| C | 3.635189340  | -2.036175990 | 19.383647050 |
| C | 2.723478050  | -3.153363350 | 19.383661990 |
| C | 0.054214540  | -4.166254310 | 19.383647050 |
| C | -1.369153740 | -3.935282850 | 19.383661990 |
| C | -3.580974800 | -2.130078320 | 19.383647050 |
| C | -4.092631790 | -0.781919500 | 19.383661990 |
| C | -3.635189340 | 2.036175990  | 19.383647050 |
| C | -2.723478050 | 3.153363350  | 19.383661990 |
| C | -0.054214540 | 4.166254310  | 19.383647050 |
| C | 1.369153740  | 3.935282850  | 19.383661990 |
| C | 4.163826420  | 0.052619880  | 20.639384220 |
| C | 3.933452360  | -1.366879340 | 20.639411580 |
| C | 2.127483370  | -3.579669510 | 20.639384220 |
| C | 0.782973950  | -4.089909340 | 20.639411580 |
| C | -2.036343050 | -3.632289400 | 20.639384220 |
| C | -3.150478410 | -2.723030000 | 20.639411580 |
| C | -4.163826420 | -0.052619880 | 20.639384220 |
| C | -3.933452360 | 1.366879340  | 20.639411580 |
| C | -2.127483370 | 3.579669510  | 20.639384220 |
| C | -0.782973950 | 4.089909340  | 20.639411580 |
| C | 2.036343050  | 3.632289400  | 20.639384220 |
| C | 3.150478410  | 2.723030000  | 20.639411580 |
| C | 3.640394730  | -2.035351050 | 21.890455680 |

|   |              |              |              |
|---|--------------|--------------|--------------|
| C | 2.723677970  | -3.158577560 | 21.890482560 |
| C | 0.057531650  | -4.170349840 | 21.890455680 |
| C | -1.373569420 | -3.938063090 | 21.890482560 |
| C | -3.582863080 | -2.134998790 | 21.890455680 |
| C | -4.097247390 | -0.779485530 | 21.890482560 |
| C | -3.640394730 | 2.035351050  | 21.890455680 |
| C | -2.723677970 | 3.158577560  | 21.890482560 |
| C | -0.057531650 | 4.170349840  | 21.890455680 |
| C | 1.373569420  | 3.938063090  | 21.890482560 |
| C | 3.582863080  | 2.134998790  | 21.890455680 |
| C | 4.097247390  | 0.779485530  | 21.890482560 |
| C | 2.129549370  | -3.577014440 | 23.135036610 |
| C | 0.779652370  | -4.089291540 | 23.135051570 |
| C | -2.033010690 | -3.632751070 | 23.135036610 |
| C | -3.151604170 | -2.719844530 | 23.135051570 |
| C | -4.162560060 | -0.055736640 | 23.135036610 |
| C | -3.931256540 | 1.369447010  | 23.135051570 |
| C | -2.129549370 | 3.577014440  | 23.135036610 |
| C | -0.779652370 | 4.089291540  | 23.135051570 |
| C | 2.033010690  | 3.632751070  | 23.135036610 |
| C | 3.151604170  | 2.719844530  | 23.135051570 |
| C | 4.162560060  | 0.055736640  | 23.135036610 |
| C | 3.931256540  | -1.369447010 | 23.135051570 |
| C | 0.050854400  | -4.148283330 | 24.390579660 |
| C | -1.360329790 | -3.919285070 | 24.390612920 |
| C | -3.567091550 | -2.118182870 | 24.390579660 |
| C | -4.074365330 | -0.781562380 | 24.390612920 |
| C | -3.617945950 | 2.030100470  | 24.390579660 |
| C | -2.714035540 | 3.137722690  | 24.390612920 |
| C | -0.050854400 | 4.148283330  | 24.390579660 |
| C | 1.360329790  | 3.919285070  | 24.390612920 |
| C | 3.567091550  | 2.118182870  | 24.390579660 |
| C | 4.074365330  | 0.781562380  | 24.390612920 |
| C | 3.617945950  | -2.030100470 | 24.390579660 |
| C | 2.714035540  | -3.137722690 | 24.390612920 |
| C | -2.028682010 | -3.634659270 | 25.650440970 |
| C | -3.154327330 | -2.716039650 | 25.650490960 |
| C | -4.162048260 | -0.060439480 | 25.650440970 |
| C | -3.929323000 | 1.373707780  | 25.650490960 |
| C | -2.133366250 | 3.574219790  | 25.650440970 |
| C | -0.774995670 | 4.089747420  | 25.650490960 |
| C | 2.028682010  | 3.634659270  | 25.650440970 |
| C | 3.154327330  | 2.716039650  | 25.650490960 |
| C | 4.162048260  | 0.060439480  | 25.650440970 |
| C | 3.929323000  | -1.373707780 | 25.650490960 |
| C | 2.133366250  | -3.574219790 | 25.650440970 |
| C | 0.774995670  | -4.089747420 | 25.650490960 |
| C | -3.614967140 | -2.155964850 | 26.891146810 |
| C | -4.135209600 | -0.785087090 | 26.891179890 |
| C | -3.674603900 | 2.052670950  | 26.891146810 |
| C | -2.747510170 | 3.188653020  | 26.891179890 |
| C | -0.059636760 | 4.208635800  | 26.891146810 |
| C | 1.387699440  | 3.973740110  | 26.891179890 |
| C | 3.614967140  | 2.155964850  | 26.891146810 |
| C | 4.135209600  | 0.785087090  | 26.891179890 |
| C | 3.674603900  | -2.052670950 | 26.891146810 |
| C | 2.747510170  | -3.188653020 | 26.891179890 |
| C | 0.059636760  | -4.208635800 | 26.891146810 |
| C | -1.387699440 | -3.973740110 | 26.891179890 |
| C | -4.267448350 | -0.007479670 | 28.108472290 |
| C | -4.046042000 | 1.356763450  | 28.108533200 |
| C | -2.140201760 | 3.691978850  | 28.108472290 |
| C | -0.848029390 | 4.182356880  | 28.108533200 |
| C | 2.127246590  | 3.699458520  | 28.108472290 |
| C | 3.198012620  | 2.825593430  | 28.108533200 |
| C | 4.267448350  | 0.007479670  | 28.108472290 |
| C | 4.046042000  | -1.356763450 | 28.108533200 |
| C | 2.140201760  | -3.691978850 | 28.108472290 |
| C | 0.848029390  | -4.182356880 | 28.108533200 |
| C | -2.127246590 | -3.699458520 | 28.108472290 |

|   |              |              |               |
|---|--------------|--------------|---------------|
| C | -3.198012620 | -2.825593430 | 28.108533200  |
| H | -0.525155940 | 4.420909430  | -29.063917890 |
| H | 1.896501180  | 4.027894350  | -29.063922180 |
| H | 3.566041900  | 2.665253100  | -29.063917890 |
| H | 4.436509420  | 0.371528980  | -29.063922180 |
| H | 4.091197840  | -1.755656330 | -29.063917890 |
| H | 2.540008240  | -3.656365380 | -29.063922180 |
| H | 0.525155940  | -4.420909430 | -29.063917890 |
| H | -1.896501180 | -4.027894350 | -29.063922180 |
| H | -3.566041900 | -2.665253100 | -29.063917890 |
| H | -4.436509420 | -0.371528980 | -29.063922180 |
| H | -4.091197840 | 1.755656330  | -29.063917890 |
| H | -2.540008240 | 3.656365380  | -29.063922180 |
| H | -4.420950100 | -0.525158980 | 29.063866090  |
| H | -4.027875970 | 1.896403430  | 29.063860500  |
| H | -2.665276070 | 3.566075600  | 29.063866090  |
| H | -0.371604440 | 4.436444630  | 29.063860500  |
| H | 1.755674030  | 4.091234580  | 29.063866090  |
| H | 3.656271530  | 2.540041200  | 29.063860500  |
| H | 4.420950100  | 0.525158980  | 29.063866090  |
| H | 4.027875970  | -1.896403430 | 29.063860500  |
| H | 2.665276070  | -3.566075600 | 29.063866090  |
| H | 0.371604440  | -4.436444630 | 29.063860500  |
| H | -1.755674030 | -4.091234580 | 29.063866090  |
| H | -3.656271530 | -2.540041200 | 29.063860500  |

Nanotube (6,6) u23v6s  
B3LYP/STO-3G Energy: -21247.419188

|   |              |              |               |
|---|--------------|--------------|---------------|
| C | -3.480063940 | 2.499904130  | -28.705734470 |
| C | -2.499904130 | 3.480063940  | -28.705734470 |
| C | 0.424948510  | 4.263775840  | -28.705734470 |
| C | 1.763871710  | 3.905012450  | -28.705734470 |
| C | 3.905012450  | 1.763871710  | -28.705734470 |
| C | 4.263775840  | 0.424948510  | -28.705734470 |
| C | 3.480063940  | -2.499904130 | -28.705734470 |
| C | 2.499904130  | -3.480063940 | -28.705734470 |
| C | -0.424948510 | -4.263775840 | -28.705734470 |
| C | -1.763871710 | -3.905012450 | -28.705734470 |
| C | -3.905012450 | -1.763871710 | -28.705734470 |
| C | -4.263775840 | -0.424948510 | -28.705734470 |
| C | -1.786446940 | 3.821915790  | -27.494382320 |
| C | -0.363849460 | 4.203099640  | -27.494382320 |
| C | 2.416652690  | 3.458066330  | -27.494382320 |
| C | 3.458066330  | 2.416652690  | -27.494382320 |
| C | 4.203099640  | -0.363849460 | -27.494382320 |
| C | 3.821915790  | -1.786446940 | -27.494382320 |
| C | 1.786446940  | -3.821915790 | -27.494382320 |
| C | 0.363849460  | -4.203099640 | -27.494382320 |
| C | -2.416652690 | -3.458066330 | -27.494382320 |
| C | -3.458066330 | -2.416652690 | -27.494382320 |
| C | -4.203099640 | 0.363849460  | -27.494382320 |
| C | -3.821915790 | 1.786446940  | -27.494382320 |
| C | 0.359602710  | 4.147205920  | -26.254954700 |
| C | 1.762177880  | 3.771387040  | -26.254954700 |
| C | 3.771387040  | 1.762177880  | -26.254954700 |
| C | 4.147205920  | 0.359602710  | -26.254954700 |
| C | 3.411784330  | -2.385028040 | -26.254954700 |
| C | 2.385028040  | -3.411784330 | -26.254954700 |
| C | -0.359602710 | -4.147205920 | -26.254954700 |
| C | -1.762177880 | -3.771387040 | -26.254954700 |
| C | -3.771387040 | -1.762177880 | -26.254954700 |
| C | -4.147205920 | -0.359602710 | -26.254954700 |
| C | -3.411784330 | 2.385028040  | -26.254954700 |
| C | -2.385028040 | 3.411784330  | -26.254954700 |
| C | 2.385230880  | 3.397290680  | -24.993991300 |
| C | 3.397290680  | 2.385230880  | -24.993991300 |
| C | 4.134755470  | -0.367025190 | -24.993991300 |

|   |              |              |               |
|---|--------------|--------------|---------------|
| C | 3.764315870  | -1.749524600 | -24.993991300 |
| C | 1.749524600  | -3.764315870 | -24.993991300 |
| C | 0.367025190  | -4.134755470 | -24.993991300 |
| C | -2.385230880 | -3.397290680 | -24.993991300 |
| C | -3.397290680 | -2.385230880 | -24.993991300 |
| C | -4.134755470 | 0.367025190  | -24.993991300 |
| C | -3.764315870 | 1.749524600  | -24.993991300 |
| C | -1.749524600 | 3.764315870  | -24.993991300 |
| C | -0.367025190 | 4.134755470  | -24.993991300 |
| C | 3.779105990  | 1.763099600  | -23.743068030 |
| C | 4.154351590  | 0.362663960  | -23.743068030 |
| C | 3.416442040  | -2.391252000 | -23.743068030 |
| C | 2.391252000  | -3.416442040 | -23.743068030 |
| C | -0.362663960 | -4.154351590 | -23.743068030 |
| C | -1.763099600 | -3.779105990 | -23.743068030 |
| C | -3.779105990 | -1.763099600 | -23.743068030 |
| C | -4.154351590 | -0.362663960 | -23.743068030 |
| C | -3.416442040 | 2.391252000  | -23.743068030 |
| C | -2.391252000 | 3.416442040  | -23.743068030 |
| C | 0.362663960  | 4.154351590  | -23.743068030 |
| C | 1.763099600  | 3.779105990  | -23.743068030 |
| C | 4.157192620  | -0.363639010 | -22.501122730 |
| C | 3.782053920  | -1.763675690 | -22.501122730 |
| C | 1.763675690  | -3.782053920 | -22.501122730 |
| C | 0.363639010  | -4.157192620 | -22.501122730 |
| C | -2.393516930 | -3.418414910 | -22.501122730 |
| C | -3.418414910 | -2.393516930 | -22.501122730 |
| C | -4.157192620 | 0.363639010  | -22.501122730 |
| C | -3.782053920 | 1.763675690  | -22.501122730 |
| C | -1.763675690 | 3.782053920  | -22.501122730 |
| C | -0.363639010 | 4.157192620  | -22.501122730 |
| C | 2.393516930  | 3.418414910  | -22.501122730 |
| C | 3.418414910  | 2.393516930  | -22.501122730 |
| C | 3.409414380  | -2.392378540 | -21.248363570 |
| C | 2.392378540  | -3.409414380 | -21.248363570 |
| C | -0.367153400 | -4.148828730 | -21.248363570 |
| C | -1.756450190 | -3.776567780 | -21.248363570 |
| C | -3.776567780 | -1.756450190 | -21.248363570 |
| C | -4.148828730 | -0.367153400 | -21.248363570 |
| C | -3.409414380 | 2.392378540  | -21.248363570 |
| C | -2.392378540 | 3.409414380  | -21.248363570 |
| C | 0.367153400  | 4.148828730  | -21.248363570 |
| C | 1.756450190  | 3.776567780  | -21.248363570 |
| C | 3.776567780  | 1.756450190  | -21.248363570 |
| C | 4.148828730  | 0.367153400  | -21.248363570 |
| C | 1.762131100  | -3.779146050 | -19.996162390 |
| C | 0.363522730  | -4.153902030 | -19.996162390 |
| C | -2.391770930 | -3.415623320 | -19.996162390 |
| C | -3.415623320 | -2.391770930 | -19.996162390 |
| C | -4.153902030 | 0.363522730  | -19.996162390 |
| C | -3.779146050 | 1.762131100  | -19.996162390 |
| C | -1.762131100 | 3.779146050  | -19.996162390 |
| C | -0.363522730 | 4.153902030  | -19.996162390 |
| C | 2.391770930  | 3.415623320  | -19.996162390 |
| C | 3.415623320  | 2.391770930  | -19.996162390 |
| C | 4.153902030  | -0.363522730 | -19.996162390 |
| C | 3.779146050  | -1.762131100 | -19.996162390 |
| C | -0.363156290 | -4.155422720 | -18.751390560 |
| C | -1.763208790 | -3.780279790 | -18.751390560 |
| C | -3.780279790 | -1.763208790 | -18.751390560 |
| C | -4.155422720 | -0.363156290 | -18.751390560 |
| C | -3.417123500 | 2.392213940  | -18.751390560 |
| C | -2.392213940 | 3.417123500  | -18.751390560 |
| C | 0.363156290  | 4.155422720  | -18.751390560 |
| C | 1.763208790  | 3.780279790  | -18.751390560 |
| C | 3.780279790  | 1.763208790  | -18.751390560 |
| C | 4.155422720  | 0.363156290  | -18.751390560 |
| C | 3.417123500  | -2.392213940 | -18.751390560 |
| C | 2.392213940  | -3.417123500 | -18.751390560 |
| C | -2.392986560 | -3.411542670 | -17.500034860 |



|   |              |              |               |
|---|--------------|--------------|---------------|
| C | -3.411542670 | -2.392986560 | -17.500034860 |
| C | -4.150975900 | 0.366615820  | -17.500034860 |
| C | -3.778158490 | 1.757989340  | -17.500034860 |
| C | -1.757989340 | 3.778158490  | -17.500034860 |
| C | -0.366615820 | 4.150975900  | -17.500034860 |
| C | 2.392986560  | 3.411542670  | -17.500034860 |
| C | 3.411542670  | 2.392986560  | -17.500034860 |
| C | 4.150975900  | -0.366615820 | -17.500034860 |
| C | 3.778158490  | -1.757989340 | -17.500034860 |
| C | 1.757989340  | -3.778158490 | -17.500034860 |
| C | 0.366615820  | -4.150975900 | -17.500034860 |
| C | -3.781590690 | -1.762326220 | -16.247274440 |
| C | -4.156116720 | -0.364576070 | -16.247274440 |
| C | -3.417014620 | 2.393790500  | -16.247274440 |
| C | -2.393790500 | 3.417014620  | -16.247274440 |
| C | 0.364576070  | 4.156116720  | -16.247274440 |
| C | 1.762326220  | 3.781590690  | -16.247274440 |
| C | 3.781590690  | 1.762326220  | -16.247274440 |
| C | 4.156116720  | 0.364576070  | -16.247274440 |
| C | 3.417014620  | -2.393790500 | -16.247274440 |
| C | 2.393790500  | -3.417014620 | -16.247274440 |
| C | -0.364576070 | -4.156116720 | -16.247274440 |
| C | -1.762326220 | -3.781590690 | -16.247274440 |
| C | -4.156908120 | 0.363316230  | -15.001787200 |
| C | -3.781646150 | 1.763812980  | -15.001787200 |
| C | -1.763812980 | 3.781646150  | -15.001787200 |
| C | -0.363316230 | 4.156908120  | -15.001787200 |
| C | 2.393095140  | 3.418329920  | -15.001787200 |
| C | 3.418329920  | 2.393095140  | -15.001787200 |
| C | 4.156908120  | -0.363316230 | -15.001787200 |
| C | 3.781646150  | -1.763812980 | -15.001787200 |
| C | 1.763812980  | -3.781646150 | -15.001787200 |
| C | 0.363316230  | -4.156908120 | -15.001787200 |
| C | -2.393095140 | -3.418329920 | -15.001787200 |
| C | -3.418329920 | -2.393095140 | -15.001787200 |
| C | -3.411331200 | 2.392272300  | -13.751334850 |
| C | -2.392272300 | 3.411331200  | -13.751334850 |
| C | 0.366102990  | 4.150435630  | -13.751334850 |
| C | 1.758163330  | 3.777434180  | -13.751334850 |
| C | 3.777434180  | 1.758163330  | -13.751334850 |
| C | 4.150435630  | 0.366102990  | -13.751334850 |
| C | 3.411331200  | -2.392272300 | -13.751334850 |
| C | 2.392272300  | -3.411331200 | -13.751334850 |
| C | -0.366102990 | -4.150435630 | -13.751334850 |
| C | -1.758163330 | -3.777434180 | -13.751334850 |
| C | -3.777434180 | -1.758163330 | -13.751334850 |
| C | -4.150435630 | -0.366102990 | -13.751334850 |
| C | -1.761272430 | 3.780061740  | -12.497753510 |
| C | -0.364724210 | 4.154265710  | -12.497753510 |
| C | 2.392993280  | 3.415337540  | -12.497753510 |
| C | 3.415337540  | 2.392993280  | -12.497753510 |
| C | 4.154265710  | -0.364724210 | -12.497753510 |
| C | 3.780061740  | -1.761272430 | -12.497753510 |
| C | 1.761272430  | -3.780061740 | -12.497753510 |
| C | 0.364724210  | -4.154265710 | -12.497753510 |
| C | -2.392993280 | -3.415337540 | -12.497753510 |
| C | -3.415337540 | -2.392993280 | -12.497753510 |
| C | -4.154265710 | 0.364724210  | -12.497753510 |
| C | -3.780061740 | 1.761272430  | -12.497753510 |
| C | 0.363288340  | 4.157418460  | -11.251635590 |
| C | 1.764092300  | 3.782074170  | -11.251635590 |
| C | 3.782074170  | 1.764092300  | -11.251635590 |
| C | 4.157418460  | 0.363288340  | -11.251635590 |
| C | 3.418785830  | -2.393326160 | -11.251635590 |
| C | 2.393326160  | -3.418785830 | -11.251635590 |
| C | -0.363288340 | -4.157418460 | -11.251635590 |
| C | -1.764092300 | -3.782074170 | -11.251635590 |
| C | -3.782074170 | -1.764092300 | -11.251635590 |
| C | -4.157418460 | -0.363288340 | -11.251635590 |
| C | -3.418785830 | 2.393326160  | -11.251635590 |

|   |              |              |               |
|---|--------------|--------------|---------------|
| C | -2.393326160 | 3.418785830  | -11.251635590 |
| C | 2.392939890  | 3.412476530  | -10.001906760 |
| C | 3.412476530  | 2.392939890  | -10.001906760 |
| C | 4.151761310  | -0.366108470 | -10.001906760 |
| C | 3.778585000  | -1.758821420 | -10.001906760 |
| C | 1.758821420  | -3.778585000 | -10.001906760 |
| C | 0.366108470  | -4.151761310 | -10.001906760 |
| C | -2.392939890 | -3.412476530 | -10.001906760 |
| C | -3.412476530 | -2.392939890 | -10.001906760 |
| C | -4.151761310 | 0.366108470  | -10.001906760 |
| C | -3.778585000 | 1.758821420  | -10.001906760 |
| C | -1.758821420 | 3.778585000  | -10.001906760 |
| C | -0.366108470 | 4.151761310  | -10.001906760 |
| C | 3.779727750  | 1.760739320  | -8.748071150  |
| C | 4.153709910  | 0.365018900  | -8.748071150  |
| C | 3.414708850  | -2.392970590 | -8.748071150  |
| C | 2.392970590  | -3.414708850 | -8.748071150  |
| C | -0.365018900 | -4.153709910 | -8.748071150  |
| C | -1.760739320 | -3.779727750 | -8.748071150  |
| C | -3.779727750 | -1.760739320 | -8.748071150  |
| C | -4.153709910 | -0.365018900 | -8.748071150  |
| C | -3.414708850 | 2.392970590  | -8.748071150  |
| C | -2.392970590 | 3.414708850  | -8.748071150  |
| C | 0.365018900  | 4.153709910  | -8.748071150  |
| C | 1.760739320  | 3.779727750  | -8.748071150  |
| C | 4.156956000  | -0.363194940 | -7.501445980  |
| C | 3.781626970  | -1.763941960 | -7.501445980  |
| C | 1.763941960  | -3.781626970 | -7.501445980  |
| C | 0.363194940  | -4.156956000 | -7.501445980  |
| C | -2.393014040 | -3.418432030 | -7.501445980  |
| C | -3.418432030 | -2.393014040 | -7.501445980  |
| C | -4.156956000 | 0.363194940  | -7.501445980  |
| C | -3.781626970 | 1.763941960  | -7.501445980  |
| C | -1.763941960 | 3.781626970  | -7.501445980  |
| C | -0.363194940 | 4.156956000  | -7.501445980  |
| C | 2.393014040  | 3.418432030  | -7.501445980  |
| C | 3.418432030  | 2.393014040  | -7.501445980  |
| C | 3.412670910  | -2.392686170 | -6.252158940  |
| C | 2.392686170  | -3.412670910 | -6.252158940  |
| C | -0.365791550 | -4.151802790 | -6.252158940  |
| C | -1.759116620 | -3.778462470 | -6.252158940  |
| C | -3.778462470 | -1.759116620 | -6.252158940  |
| C | -4.151802790 | -0.365791550 | -6.252158940  |
| C | -3.412670910 | 2.392686170  | -6.252158940  |
| C | -2.392686170 | 3.412670910  | -6.252158940  |
| C | 0.365791550  | 4.151802790  | -6.252158940  |
| C | 1.759116620  | 3.778462470  | -6.252158940  |
| C | 3.778462470  | 1.759116620  | -6.252158940  |
| C | 4.151802790  | 0.365791550  | -6.252158940  |
| C | 1.760350440  | -3.779167830 | -4.998487930  |
| C | 0.365075720  | -4.153030560 | -4.998487930  |
| C | -2.392680130 | -3.414092110 | -4.998487930  |
| C | -3.414092110 | -2.392680130 | -4.998487930  |
| C | -4.153030560 | 0.365075720  | -4.998487930  |
| C | -3.779167830 | 1.760350440  | -4.998487930  |
| C | -1.760350440 | 3.779167830  | -4.998487930  |
| C | -0.365075720 | 4.153030560  | -4.998487930  |
| C | 2.392680130  | 3.414092110  | -4.998487930  |
| C | 3.414092110  | 2.392680130  | -4.998487930  |
| C | 4.153030560  | -0.365075720 | -4.998487930  |
| C | 3.779167830  | -1.760350440 | -4.998487930  |
| C | -0.363128730 | -4.156799240 | -3.751117250  |
| C | -1.763920920 | -3.781458110 | -3.751117250  |
| C | -3.781458110 | -1.763920920 | -3.751117250  |
| C | -4.156799240 | -0.363128730 | -3.751117250  |
| C | -3.418329380 | 2.392878320  | -3.751117250  |
| C | -2.392878320 | 3.418329380  | -3.751117250  |
| C | 0.363128730  | 4.156799240  | -3.751117250  |
| C | 1.763920920  | 3.781458110  | -3.751117250  |
| C | 3.781458110  | 1.763920920  | -3.751117250  |

|   |              |              |              |
|---|--------------|--------------|--------------|
| C | 4.156799240  | 0.363128730  | -3.751117250 |
| C | 3.418329380  | -2.392878320 | -3.751117250 |
| C | 2.392878320  | -3.418329380 | -3.751117250 |
| C | -2.392501330 | -3.413012710 | -2.502138810 |
| C | -3.413012710 | -2.392501330 | -2.502138810 |
| C | -4.152006380 | 0.365460570  | -2.502138810 |
| C | -3.778473280 | 1.759505050  | -2.502138810 |
| C | -1.759505050 | 3.778473280  | -2.502138810 |
| C | -0.365460570 | 4.152006380  | -2.502138810 |
| C | 2.392501330  | 3.413012710  | -2.502138810 |
| C | 3.413012710  | 2.392501330  | -2.502138810 |
| C | 4.152006380  | -0.365460570 | -2.502138810 |
| C | 3.778473280  | -1.759505050 | -2.502138810 |
| C | 1.759505050  | -3.778473280 | -2.502138810 |
| C | 0.365460570  | -4.152006380 | -2.502138810 |
| C | -3.778727170 | -1.759844390 | -1.248420660 |
| C | -4.152395920 | -0.365293640 | -1.248420660 |
| C | -3.413433540 | 2.392551530  | -1.248420660 |
| C | -2.392551530 | 3.413433540  | -1.248420660 |
| C | 0.365293640  | 4.152395920  | -1.248420660 |
| C | 1.759844390  | 3.778727170  | -1.248420660 |
| C | 3.778727170  | 1.759844390  | -1.248420660 |
| C | 4.152395920  | 0.365293640  | -1.248420660 |
| C | 3.413433540  | -2.392551530 | -1.248420660 |
| C | 2.392551530  | -3.413433540 | -1.248420660 |
| C | -0.365293640 | -4.152395920 | -1.248420660 |
| C | -1.759844390 | -3.778727170 | -1.248420660 |
| C | -4.156713970 | 0.363211460  | 0.000000000  |
| C | -3.781425620 | 1.763806630  | 0.000000000  |
| C | -1.763806630 | 3.781425620  | 0.000000000  |
| C | -0.363211460 | 4.156713970  | 0.000000000  |
| C | 2.392907330  | 3.418214160  | 0.000000000  |
| C | 3.418214160  | 2.392907330  | 0.000000000  |
| C | 4.156713970  | -0.363211460 | 0.000000000  |
| C | 3.781425620  | -1.763806630 | 0.000000000  |
| C | 1.763806630  | -3.781425620 | 0.000000000  |
| C | 0.363211460  | -4.156713970 | 0.000000000  |
| C | -2.392907330 | -3.418214160 | 0.000000000  |
| C | -3.418214160 | -2.392907330 | 0.000000000  |
| C | -3.413433540 | 2.392551530  | 1.248420660  |
| C | -2.392551530 | 3.413433540  | 1.248420660  |
| C | 0.365293640  | 4.152395920  | 1.248420660  |
| C | 1.759844390  | 3.778727170  | 1.248420660  |
| C | 3.778727170  | 1.759844390  | 1.248420660  |
| C | 4.152395920  | 0.365293640  | 1.248420660  |
| C | 3.413433540  | -2.392551530 | 1.248420660  |
| C | 2.392551530  | -3.413433540 | 1.248420660  |
| C | -0.365293640 | -4.152395920 | 1.248420660  |
| C | -1.759844390 | -3.778727170 | 1.248420660  |
| C | -3.778727170 | -1.759844390 | 1.248420660  |
| C | -4.152395920 | -0.365293640 | 1.248420660  |
| C | -1.759505050 | 3.778473280  | 2.502138810  |
| C | -0.365460570 | 4.152006380  | 2.502138810  |
| C | 2.392501330  | 3.413012710  | 2.502138810  |
| C | 3.413012710  | 2.392501330  | 2.502138810  |
| C | 4.152006380  | -0.365460570 | 2.502138810  |
| C | 3.778473280  | -1.759505050 | 2.502138810  |
| C | 1.759505050  | -3.778473280 | 2.502138810  |
| C | 0.365460570  | -4.152006380 | 2.502138810  |
| C | -2.392501330 | -3.413012710 | 2.502138810  |
| C | -3.413012710 | -2.392501330 | 2.502138810  |
| C | -4.152006380 | 0.365460570  | 2.502138810  |
| C | -3.778473280 | 1.759505050  | 2.502138810  |
| C | 0.363128730  | 4.156799240  | 3.751117250  |
| C | 1.763920920  | 3.781458110  | 3.751117250  |
| C | 3.781458110  | 1.763920920  | 3.751117250  |
| C | 4.156799240  | 0.363128730  | 3.751117250  |
| C | 3.418329380  | -2.392878320 | 3.751117250  |
| C | 2.392878320  | -3.418329380 | 3.751117250  |
| C | -0.363128730 | -4.156799240 | 3.751117250  |

|   |              |              |              |
|---|--------------|--------------|--------------|
| C | -1.763920920 | -3.781458110 | 3.751117250  |
| C | -3.781458110 | -1.763920920 | 3.751117250  |
| C | -4.156799240 | -0.363128730 | 3.751117250  |
| C | -3.418329380 | 2.392878320  | 3.751117250  |
| C | -2.392878320 | 3.418329380  | 3.751117250  |
| C | 2.392680130  | 3.414092110  | 4.998487930  |
| C | 3.414092110  | 2.392680130  | 4.998487930  |
| C | 4.153030560  | -0.365075720 | 4.998487930  |
| C | 3.779167830  | -1.760350440 | 4.998487930  |
| C | 1.760350440  | -3.779167830 | 4.998487930  |
| C | 0.365075720  | -4.153030560 | 4.998487930  |
| C | -2.392680130 | -3.414092110 | 4.998487930  |
| C | -3.414092110 | -2.392680130 | 4.998487930  |
| C | -4.153030560 | 0.365075720  | 4.998487930  |
| C | -3.779167830 | 1.760350440  | 4.998487930  |
| C | -1.760350440 | 3.779167830  | 4.998487930  |
| C | -0.365075720 | 4.153030560  | 4.998487930  |
| C | 3.778462470  | 1.759116620  | 6.252158940  |
| C | 4.151802790  | 0.365791550  | 6.252158940  |
| C | 3.412670910  | -2.392686170 | 6.252158940  |
| C | 2.392686170  | -3.412670910 | 6.252158940  |
| C | -0.365791550 | -4.151802790 | 6.252158940  |
| C | -1.759116620 | -3.778462470 | 6.252158940  |
| C | -3.778462470 | -1.759116620 | 6.252158940  |
| C | -4.151802790 | -0.365791550 | 6.252158940  |
| C | -3.412670910 | 2.392686170  | 6.252158940  |
| C | -2.392686170 | 3.412670910  | 6.252158940  |
| C | 0.365791550  | 4.151802790  | 6.252158940  |
| C | 1.759116620  | 3.778462470  | 6.252158940  |
| C | 4.156956000  | -0.363194940 | 7.501445980  |
| C | 3.781626970  | -1.763941960 | 7.501445980  |
| C | 1.763941960  | -3.781626970 | 7.501445980  |
| C | 0.363194940  | -4.156956000 | 7.501445980  |
| C | -2.393014040 | -3.418432030 | 7.501445980  |
| C | -3.418432030 | -2.393014040 | 7.501445980  |
| C | -4.156956000 | 0.363194940  | 7.501445980  |
| C | -3.781626970 | 1.763941960  | 7.501445980  |
| C | -1.763941960 | 3.781626970  | 7.501445980  |
| C | -0.363194940 | 4.156956000  | 7.501445980  |
| C | 2.393014040  | 3.418432030  | 7.501445980  |
| C | 3.418432030  | 2.393014040  | 7.501445980  |
| C | 3.414708850  | -2.392970590 | 8.748071150  |
| C | 2.392970590  | -3.414708850 | 8.748071150  |
| C | -0.365018900 | -4.153709910 | 8.748071150  |
| C | -1.760739320 | -3.779727750 | 8.748071150  |
| C | -3.779727750 | -1.760739320 | 8.748071150  |
| C | -4.153709910 | -0.365018900 | 8.748071150  |
| C | -3.414708850 | 2.392970590  | 8.748071150  |
| C | -2.392970590 | 3.414708850  | 8.748071150  |
| C | 0.365018900  | 4.153709910  | 8.748071150  |
| C | 1.760739320  | 3.779727750  | 8.748071150  |
| C | 3.779727750  | 1.760739320  | 8.748071150  |
| C | 4.153709910  | 0.365018900  | 8.748071150  |
| C | 1.758821420  | -3.778585000 | 10.001906760 |
| C | 0.366108470  | -4.151761310 | 10.001906760 |
| C | -2.392939890 | -3.412476530 | 10.001906760 |
| C | -3.412476530 | -2.392939890 | 10.001906760 |
| C | -4.151761310 | 0.366108470  | 10.001906760 |
| C | -3.778585000 | 1.758821420  | 10.001906760 |
| C | -1.758821420 | 3.778585000  | 10.001906760 |
| C | -0.366108470 | 4.151761310  | 10.001906760 |
| C | 2.392939890  | 3.412476530  | 10.001906760 |
| C | 3.412476530  | 2.392939890  | 10.001906760 |
| C | 4.151761310  | -0.366108470 | 10.001906760 |
| C | 3.778585000  | -1.758821420 | 10.001906760 |
| C | -0.363288340 | -4.157418460 | 11.251635590 |
| C | -1.764092300 | -3.782074170 | 11.251635590 |
| C | -3.782074170 | -1.764092300 | 11.251635590 |
| C | -4.157418460 | -0.363288340 | 11.251635590 |
| C | -3.418785830 | 2.393326160  | 11.251635590 |

|   |              |              |              |
|---|--------------|--------------|--------------|
| C | -2.393326160 | 3.418785830  | 11.251635590 |
| C | 0.363288340  | 4.157418460  | 11.251635590 |
| C | 1.764092300  | 3.782074170  | 11.251635590 |
| C | 3.782074170  | 1.764092300  | 11.251635590 |
| C | 4.157418460  | 0.363288340  | 11.251635590 |
| C | 3.418785830  | -2.393326160 | 11.251635590 |
| C | 2.393326160  | -3.418785830 | 11.251635590 |
| C | -2.392993280 | -3.415337540 | 12.497753510 |
| C | -3.415337540 | -2.392993280 | 12.497753510 |
| C | -4.154265710 | 0.364724210  | 12.497753510 |
| C | -3.780061740 | 1.761272430  | 12.497753510 |
| C | -1.761272430 | 3.780061740  | 12.497753510 |
| C | -0.364724210 | 4.154265710  | 12.497753510 |
| C | 2.392993280  | 3.415337540  | 12.497753510 |
| C | 3.415337540  | 2.392993280  | 12.497753510 |
| C | 4.154265710  | -0.364724210 | 12.497753510 |
| C | 3.780061740  | -1.761272430 | 12.497753510 |
| C | 1.761272430  | -3.780061740 | 12.497753510 |
| C | 0.364724210  | -4.154265710 | 12.497753510 |
| C | -3.777434180 | -1.758163330 | 13.751334850 |
| C | -4.150435630 | -0.366102990 | 13.751334850 |
| C | -3.411331200 | 2.392272300  | 13.751334850 |
| C | -2.392272300 | 3.411331200  | 13.751334850 |
| C | 0.366102990  | 4.150435630  | 13.751334850 |
| C | 1.758163330  | 3.777434180  | 13.751334850 |
| C | 3.777434180  | 1.758163330  | 13.751334850 |
| C | 4.150435630  | 0.366102990  | 13.751334850 |
| C | 3.411331200  | -2.392272300 | 13.751334850 |
| C | 2.392272300  | -3.411331200 | 13.751334850 |
| C | -0.366102990 | -4.150435630 | 13.751334850 |
| C | -1.758163330 | -3.777434180 | 13.751334850 |
| C | -4.156908120 | 0.363316230  | 15.001787200 |
| C | -3.781646150 | 1.763812980  | 15.001787200 |
| C | -1.763812980 | 3.781646150  | 15.001787200 |
| C | -0.363316230 | 4.156908120  | 15.001787200 |
| C | 2.393095140  | 3.418329920  | 15.001787200 |
| C | 3.418329920  | 2.393095140  | 15.001787200 |
| C | 4.156908120  | -0.363316230 | 15.001787200 |
| C | 3.781646150  | -1.763812980 | 15.001787200 |
| C | 1.763812980  | -3.781646150 | 15.001787200 |
| C | 0.363316230  | -4.156908120 | 15.001787200 |
| C | -2.393095140 | -3.418329920 | 15.001787200 |
| C | -3.418329920 | -2.393095140 | 15.001787200 |
| C | -3.417014620 | 2.393790500  | 16.247274440 |
| C | -2.393790500 | 3.417014620  | 16.247274440 |
| C | 0.364576070  | 4.156116720  | 16.247274440 |
| C | 1.762326220  | 3.781590690  | 16.247274440 |
| C | 3.781590690  | 1.762326220  | 16.247274440 |
| C | 4.156116720  | 0.364576070  | 16.247274440 |
| C | 3.417014620  | -2.393790500 | 16.247274440 |
| C | 2.393790500  | -3.417014620 | 16.247274440 |
| C | -0.364576070 | -4.156116720 | 16.247274440 |
| C | -1.762326220 | -3.781590690 | 16.247274440 |
| C | -3.781590690 | -1.762326220 | 16.247274440 |
| C | -4.156116720 | -0.364576070 | 16.247274440 |
| C | -1.757989340 | 3.778158490  | 17.500034860 |
| C | -0.366615820 | 4.150975900  | 17.500034860 |
| C | 2.392986560  | 3.411542670  | 17.500034860 |
| C | 3.411542670  | 2.392986560  | 17.500034860 |
| C | 4.150975900  | -0.366615820 | 17.500034860 |
| C | 3.778158490  | -1.757989340 | 17.500034860 |
| C | 1.757989340  | -3.778158490 | 17.500034860 |
| C | 0.366615820  | -4.150975900 | 17.500034860 |
| C | -2.392986560 | -3.411542670 | 17.500034860 |
| C | -3.411542670 | -2.392986560 | 17.500034860 |
| C | -4.150975900 | 0.366615820  | 17.500034860 |
| C | -3.778158490 | 1.757989340  | 17.500034860 |
| C | 0.363156290  | 4.155422720  | 18.751390560 |
| C | 1.763208790  | 3.780279790  | 18.751390560 |
| C | 3.780279790  | 1.763208790  | 18.751390560 |

|   |              |              |              |
|---|--------------|--------------|--------------|
| C | 4.155422720  | 0.363156290  | 18.751390560 |
| C | 3.417123500  | -2.392213940 | 18.751390560 |
| C | 2.392213940  | -3.417123500 | 18.751390560 |
| C | -0.363156290 | -4.155422720 | 18.751390560 |
| C | -1.763208790 | -3.780279790 | 18.751390560 |
| C | -3.780279790 | -1.763208790 | 18.751390560 |
| C | -4.155422720 | -0.363156290 | 18.751390560 |
| C | -3.417123500 | 2.392213940  | 18.751390560 |
| C | -2.392213940 | 3.417123500  | 18.751390560 |
| C | 2.391770930  | 3.415623320  | 19.996162390 |
| C | 3.415623320  | 2.391770930  | 19.996162390 |
| C | 4.153902030  | -0.363522730 | 19.996162390 |
| C | 3.779146050  | -1.762131100 | 19.996162390 |
| C | 1.762131100  | -3.779146050 | 19.996162390 |
| C | 0.363522730  | -4.153902030 | 19.996162390 |
| C | -2.391770930 | -3.415623320 | 19.996162390 |
| C | -3.415623320 | -2.391770930 | 19.996162390 |
| C | -4.153902030 | 0.363522730  | 19.996162390 |
| C | -3.779146050 | 1.762131100  | 19.996162390 |
| C | -1.762131100 | 3.779146050  | 19.996162390 |
| C | -0.363522730 | 4.153902030  | 19.996162390 |
| C | 3.776567780  | 1.756450190  | 21.248363570 |
| C | 4.148828730  | 0.367153400  | 21.248363570 |
| C | 3.409414380  | -2.392378540 | 21.248363570 |
| C | 2.392378540  | -3.409414380 | 21.248363570 |
| C | -0.367153400 | -4.148828730 | 21.248363570 |
| C | -1.756450190 | -3.776567780 | 21.248363570 |
| C | -3.776567780 | -1.756450190 | 21.248363570 |
| C | -4.148828730 | -0.367153400 | 21.248363570 |
| C | -3.409414380 | 2.392378540  | 21.248363570 |
| C | -2.392378540 | 3.409414380  | 21.248363570 |
| C | 0.367153400  | 4.148828730  | 21.248363570 |
| C | 1.756450190  | 3.776567780  | 21.248363570 |
| C | 4.157192620  | -0.363639010 | 22.501122730 |
| C | 3.782053920  | -1.763675690 | 22.501122730 |
| C | 1.763675690  | -3.782053920 | 22.501122730 |
| C | 0.363639010  | -4.157192620 | 22.501122730 |
| C | -2.393516930 | -3.418414910 | 22.501122730 |
| C | -3.418414910 | -2.393516930 | 22.501122730 |
| C | -4.157192620 | 0.363639010  | 22.501122730 |
| C | -3.782053920 | 1.763675690  | 22.501122730 |
| C | -1.763675690 | 3.782053920  | 22.501122730 |
| C | -0.363639010 | 4.157192620  | 22.501122730 |
| C | 2.393516930  | 3.418414910  | 22.501122730 |
| C | 3.418414910  | 2.393516930  | 22.501122730 |
| C | 3.416442040  | -2.391252000 | 23.743068030 |
| C | 2.391252000  | -3.416442040 | 23.743068030 |
| C | -0.362663960 | -4.154351590 | 23.743068030 |
| C | -1.763099600 | -3.779105990 | 23.743068030 |
| C | -3.779105990 | -1.763099600 | 23.743068030 |
| C | -4.154351590 | -0.362663960 | 23.743068030 |
| C | -3.416442040 | 2.391252000  | 23.743068030 |
| C | -2.391252000 | 3.416442040  | 23.743068030 |
| C | 0.362663960  | 4.154351590  | 23.743068030 |
| C | 1.763099600  | 3.779105990  | 23.743068030 |
| C | 3.779105990  | 1.763099600  | 23.743068030 |
| C | 4.154351590  | 0.362663960  | 23.743068030 |
| C | 1.749524600  | -3.764315870 | 24.993991300 |
| C | 0.367025190  | -4.134755470 | 24.993991300 |
| C | -2.385230880 | -3.397290680 | 24.993991300 |
| C | -3.397290680 | -2.385230880 | 24.993991300 |
| C | -4.134755470 | 0.367025190  | 24.993991300 |
| C | -3.764315870 | 1.749524600  | 24.993991300 |
| C | -1.749524600 | 3.764315870  | 24.993991300 |
| C | -0.367025190 | 4.134755470  | 24.993991300 |
| C | 2.385230880  | 3.397290680  | 24.993991300 |
| C | 3.397290680  | 2.385230880  | 24.993991300 |
| C | 4.134755470  | -0.367025190 | 24.993991300 |
| C | 3.764315870  | -1.749524600 | 24.993991300 |
| C | -0.359602710 | -4.147205920 | 26.254954700 |

|   |              |              |               |
|---|--------------|--------------|---------------|
| C | -1.762177880 | -3.771387040 | 26.254954700  |
| C | -3.771387040 | -1.762177880 | 26.254954700  |
| C | -4.147205920 | -0.359602710 | 26.254954700  |
| C | -3.411784330 | 2.385028040  | 26.254954700  |
| C | -2.385028040 | 3.411784330  | 26.254954700  |
| C | 0.359602710  | 4.147205920  | 26.254954700  |
| C | 1.762177880  | 3.771387040  | 26.254954700  |
| C | 3.771387040  | 1.762177880  | 26.254954700  |
| C | 4.147205920  | 0.359602710  | 26.254954700  |
| C | 3.411784330  | -2.385028040 | 26.254954700  |
| C | 2.385028040  | -3.411784330 | 26.254954700  |
| C | -2.416652690 | -3.458066330 | 27.494382320  |
| C | -3.458066330 | -2.416652690 | 27.494382320  |
| C | -4.203099640 | 0.363849460  | 27.494382320  |
| C | -3.821915790 | 1.786446940  | 27.494382320  |
| C | -1.786446940 | 3.821915790  | 27.494382320  |
| C | -0.363849460 | 4.203099640  | 27.494382320  |
| C | 2.416652690  | 3.458066330  | 27.494382320  |
| C | 3.458066330  | 2.416652690  | 27.494382320  |
| C | 4.203099640  | -0.363849460 | 27.494382320  |
| C | 3.821915790  | -1.786446940 | 27.494382320  |
| C | 1.786446940  | -3.821915790 | 27.494382320  |
| C | 0.363849460  | -4.203099640 | 27.494382320  |
| C | -3.905012450 | -1.763871710 | 28.705734470  |
| C | -4.263775840 | -0.424948510 | 28.705734470  |
| C | -3.480063940 | 2.499904130  | 28.705734470  |
| C | -2.499904130 | 3.480063940  | 28.705734470  |
| C | 0.424948510  | 4.263775840  | 28.705734470  |
| C | 1.763871710  | 3.905012450  | 28.705734470  |
| C | 3.905012450  | 1.763871710  | 28.705734470  |
| C | 4.263775840  | 0.424948510  | 28.705734470  |
| C | 3.480063940  | -2.499904130 | 28.705734470  |
| C | 2.499904130  | -3.480063940 | 28.705734470  |
| C | -0.424948510 | -4.263775840 | 28.705734470  |
| C | -1.763871710 | -3.905012450 | 28.705734470  |
| H | -3.911023850 | 2.173249580  | -29.661057540 |
| H | -2.173249580 | 3.911023850  | -29.661057540 |
| H | -0.073422580 | 4.473670800  | -29.661057540 |
| H | 2.300421220  | 3.837601270  | -29.661057540 |
| H | 3.837601270  | 2.300421220  | -29.661057540 |
| H | 4.473670800  | -0.073422580 | -29.661057540 |
| H | 3.911023850  | -2.173249580 | -29.661057540 |
| H | 2.173249580  | -3.911023850 | -29.661057540 |
| H | 0.073422580  | -4.473670800 | -29.661057540 |
| H | -2.300421220 | -3.837601270 | -29.661057540 |
| H | -3.837601270 | -2.300421220 | -29.661057540 |
| H | -4.473670800 | 0.073422580  | -29.661057540 |
| H | -3.837601270 | -2.300421220 | 29.661057540  |
| H | -4.473670800 | 0.073422580  | 29.661057540  |
| H | -3.911023850 | 2.173249580  | 29.661057540  |
| H | -2.173249580 | 3.911023850  | 29.661057540  |
| H | -0.073422580 | 4.473670800  | 29.661057540  |
| H | 2.300421220  | 3.837601270  | 29.661057540  |
| H | 3.837601270  | 2.300421220  | 29.661057540  |
| H | 4.473670800  | -0.073422580 | 29.661057540  |
| H | 3.911023850  | -2.173249580 | 29.661057540  |
| H | 2.173249580  | -3.911023850 | 29.661057540  |
| H | 0.073422580  | -4.473670800 | 29.661057540  |
| H | -2.300421220 | -3.837601270 | 29.661057540  |

Nanotube (6,6) u24v0s  
B3LYP/STO-3G Energy: -21699.195841

|   |             |             |             |
|---|-------------|-------------|-------------|
| C | 0.00754031  | 4.26920876  | 29.34993225 |
| C | -1.35811396 | 4.04742714  | 29.34992587 |
| C | -3.69347309 | 2.14113448  | 29.34993225 |
| C | -4.18423170 | 0.84755238  | 29.34992587 |
| C | -3.70101340 | -2.12807428 | 29.34993225 |

|   |             |             |             |
|---|-------------|-------------|-------------|
| C | -2.82611774 | -3.19987476 | 29.34992587 |
| C | -0.00754031 | -4.26920876 | 29.34993225 |
| C | 1.35811396  | -4.04742714 | 29.34992587 |
| C | 3.69347309  | -2.14113448 | 29.34993225 |
| C | 4.18423170  | -0.84755238 | 29.34992587 |
| C | 3.70101340  | 2.12807428  | 29.34993225 |
| C | 2.82611774  | 3.19987476  | 29.34992587 |
| C | -2.05328248 | 3.67721993  | 28.13446895 |
| C | -3.19154679 | 2.74807859  | 28.13446254 |
| C | -4.21120712 | 0.06041518  | 28.13446895 |
| C | -3.97567926 | -1.38992130 | 28.13446254 |
| C | -2.15792464 | -3.61680476 | 28.13446895 |
| C | -0.78413248 | -4.13799989 | 28.13446254 |
| C | 2.05328248  | -3.67721993 | 28.13446895 |
| C | 3.19154679  | -2.74807859 | 28.13446254 |
| C | 4.21120712  | -0.06041518 | 28.13446895 |
| C | 3.97567926  | 1.38992130  | 28.13446254 |
| C | 2.15792464  | 3.61680476  | 28.13446895 |
| C | 0.78413248  | 4.13799989  | 28.13446254 |
| C | -3.57447275 | 2.13268397  | 26.89434399 |
| C | -4.08958341 | 0.77493959  | 26.89433629 |
| C | -3.63419487 | -2.02924222 | 26.89434399 |
| C | -2.71590908 | -3.15421333 | 26.89433629 |
| C | -0.05972213 | -4.16192619 | 26.89434399 |
| C | 1.37367434  | -3.92915292 | 26.89433629 |
| C | 3.57447275  | -2.13268397 | 26.89434399 |
| C | 4.08958341  | -0.77493959 | 26.89433629 |
| C | 3.63419487  | 2.02924222  | 26.89434399 |
| C | 2.71590908  | 3.15421333  | 26.89433629 |
| C | 0.05972213  | 4.16192619  | 26.89434399 |
| C | -1.37367434 | 3.92915292  | 26.89433629 |
| C | -4.14938957 | 0.05068135  | 25.63344983 |
| C | -3.92012446 | -1.36112757 | 25.63343641 |
| C | -2.11858613 | -3.56813610 | 25.63344983 |
| C | -0.78129117 | -4.07549116 | 25.63343641 |
| C | 2.03080345  | -3.61881746 | 25.63344983 |
| C | 3.13883329  | -2.71436358 | 25.63343641 |
| C | 4.14938957  | -0.05068135 | 25.63344983 |
| C | 3.92012446  | 1.36112757  | 25.63343641 |
| C | 2.11858613  | 3.56813610  | 25.63344983 |
| C | 0.78129117  | 4.07549116  | 25.63343641 |
| C | -2.03080345 | 3.61881746  | 25.63344983 |
| C | -3.13883329 | 2.71436358  | 25.63343641 |
| C | -3.63550359 | -2.03349201 | 24.37973072 |
| C | -2.72033754 | -3.15464422 | 24.37970998 |
| C | -0.05669605 | -4.16518447 | 24.37973072 |
| C | 1.37183327  | -3.93320353 | 24.37970998 |
| C | 3.57880753  | -2.13169246 | 24.37973072 |
| C | 4.09217081  | -0.77855931 | 24.37970998 |
| C | 3.63550359  | 2.03349201  | 24.37973072 |
| C | 2.72033754  | 3.15464422  | 24.37970998 |
| C | 0.05669605  | 4.16518447  | 24.37973072 |
| C | -1.37183327 | 3.93320353  | 24.37970998 |
| C | -3.57880753 | 2.13169246  | 24.37973072 |
| C | -4.09217081 | 0.77855931  | 24.37970998 |
| C | -2.13456936 | -3.58273949 | 23.13594789 |
| C | -0.77901743 | -4.09701821 | 23.13592623 |
| C | 2.03545873  | -3.63996103 | 23.13594789 |
| C | 3.15861314  | -2.72315799 | 23.13592623 |
| C | 4.17002809  | -0.05722155 | 23.13594789 |
| C | 3.93763057  | 1.37386022  | 23.13592623 |
| C | 2.13456936  | 3.58273949  | 23.13594789 |
| C | 0.77901743  | 4.09701821  | 23.13592623 |
| C | -2.03545873 | 3.63996103  | 23.13594789 |
| C | -3.15861314 | 2.72315799  | 23.13592623 |
| C | -4.17002809 | 0.05722155  | 23.13594789 |
| C | -3.93763057 | -1.37386022 | 23.13592623 |
| C | -0.05218092 | -4.16375276 | 21.88338932 |
| C | 1.36709469  | -3.93327361 | 21.88337658 |
| C | 3.57982521  | -2.12706639 | 21.88338932 |



|   |             |             |             |
|---|-------------|-------------|-------------|
| C | 4.08986222  | -0.78269807 | 21.88337658 |
| C | 3.63200613  | 2.03668638  | 21.88338932 |
| C | 2.72276752  | 3.15057554  | 21.88337658 |
| C | 0.05218092  | 4.16375276  | 21.88338932 |
| C | -1.36709469 | 3.93327361  | 21.88337658 |
| C | -3.57982521 | 2.12706639  | 21.88338932 |
| C | -4.08986222 | 0.78269807  | 21.88337658 |
| C | -3.63200613 | -2.03668638 | 21.88338932 |
| C | -2.72276752 | -3.15057554 | 21.88337658 |
| C | 2.03673561  | -3.63803331 | 20.62902125 |
| C | 3.15647136  | -2.72402432 | 20.62901996 |
| C | 4.16899708  | -0.05515187 | 20.62902125 |
| C | 3.93730994  | 1.37157223  | 20.62901996 |
| C | 2.13226146  | 3.58288144  | 20.62902125 |
| C | 0.78083858  | 4.09559654  | 20.62901996 |
| C | -2.03673561 | 3.63803331  | 20.62902125 |
| C | -3.15647136 | 2.72402432  | 20.62901996 |
| C | -4.16899708 | 0.05515187  | 20.62902125 |
| C | -3.93730994 | -1.37157223 | 20.62901996 |
| C | -2.13226146 | -3.58288144 | 20.62902125 |
| C | -0.78083858 | -4.09559654 | 20.62901996 |
| C | 3.58432868  | -2.13521340 | 19.38330088 |
| C | 4.09863664  | -0.77958266 | 19.38330876 |
| C | 3.64131339  | 2.03651299  | 19.38330088 |
| C | 2.72445671  | 3.15973212  | 19.38330876 |
| C | 0.05698471  | 4.17172640  | 19.38330088 |
| C | -1.37417993 | 3.93931478  | 19.38330876 |
| C | -3.58432868 | 2.13521340  | 19.38330088 |
| C | -4.09863664 | 0.77958266  | 19.38330876 |
| C | -3.64131339 | -2.03651299 | 19.38330088 |
| C | -2.72445671 | -3.15973212 | 19.38330876 |
| C | -0.05698471 | -4.17172640 | 19.38330088 |
| C | 1.37417993  | -3.93931478 | 19.38330876 |
| C | 4.16426577  | -0.05322354 | 18.13305616 |
| C | 3.93343018  | 1.36824686  | 18.13306925 |
| C | 2.12822583  | 3.57974817  | 18.13305616 |
| C | 0.78177855  | 4.09057389  | 18.13306925 |
| C | -2.03603995 | 3.63297172  | 18.13305616 |
| C | -3.15165163 | 2.72232703  | 18.13306925 |
| C | -4.16426577 | 0.05322354  | 18.13305616 |
| C | -3.93343018 | -1.36824686 | 18.13306925 |
| C | -2.12822583 | -3.57974817 | 18.13305616 |
| C | -0.78177855 | -4.09057389 | 18.13306925 |
| C | 2.03603995  | -3.63297172 | 18.13305616 |
| C | 3.15165163  | -2.72232703 | 18.13306925 |
| C | 3.63557547  | 2.03606030  | 16.87834898 |
| C | 2.72286705  | 3.15420120  | 16.87835986 |
| C | 0.05450779  | 4.16653086  | 16.87834898 |
| C | -1.37018484 | 3.93517264  | 16.87835986 |
| C | -3.58106768 | 2.13047056  | 16.87834898 |
| C | -4.09305189 | 0.78097144  | 16.87835986 |
| C | -3.63557547 | -2.03606030 | 16.87834898 |
| C | -2.72286705 | -3.15420120 | 16.87835986 |
| C | -0.05450779 | -4.16653086 | 16.87834898 |
| C | 1.37018484  | -3.93517264 | 16.87835986 |
| C | 3.58106768  | -2.13047056 | 16.87834898 |
| C | 4.09305189  | -0.78097144 | 16.87835986 |
| C | 2.13522434  | 3.58440237  | 15.63079818 |
| C | 0.77962870  | 4.09870053  | 15.63080381 |
| C | -2.03657134 | 3.64135970  | 15.63079818 |
| C | -3.15976443 | 2.72452853  | 15.63080381 |
| C | -4.17179568 | 0.05695734  | 15.63079818 |
| C | -3.93939314 | -1.37417200 | 15.63080381 |
| C | -2.13522434 | -3.58440237 | 15.63079818 |
| C | -0.77962870 | -4.09870053 | 15.63080381 |
| C | 2.03657134  | -3.64135970 | 15.63079818 |
| C | 3.15976443  | -2.72452853 | 15.63080381 |
| C | 4.17179568  | -0.05695734 | 15.63079818 |
| C | 3.93939314  | 1.37417200  | 15.63080381 |
| C | 0.05392793  | 4.16673067  | 14.38172389 |

|   |             |             |             |
|---|-------------|-------------|-------------|
| C | -1.36969255 | 3.93554692  | 14.38172487 |
| C | -3.58153065 | 2.13006829  | 14.38172389 |
| C | -4.09312989 | 0.78158492  | 14.38172487 |
| C | -3.63545858 | -2.03666238 | 14.38172389 |
| C | -2.72343734 | -3.15396200 | 14.38172487 |
| C | -0.05392793 | -4.16673067 | 14.38172389 |
| C | 1.36969255  | -3.93554692 | 14.38172487 |
| C | 3.58153065  | -2.13006829 | 14.38172389 |
| C | 4.09312989  | -0.78158492 | 14.38172487 |
| C | 3.63545858  | 2.03666238  | 14.38172389 |
| C | 2.72343734  | 3.15396200  | 14.38172487 |
| C | -2.03645886 | 3.63527610  | 13.12693344 |
| C | -3.15382391 | 2.72320239  | 13.12693057 |
| C | -4.16647089 | 0.05401294  | 13.12693344 |
| C | -3.93527440 | -1.36969043 | 13.12693057 |
| C | -2.13001202 | -3.58126316 | 13.12693344 |
| C | -0.78145050 | -4.09289282 | 13.12693057 |
| C | 2.03645886  | -3.63527610 | 13.12693344 |
| C | 3.15382391  | -2.72320239 | 13.12693057 |
| C | 4.16647089  | -0.05401294 | 13.12693344 |
| C | 3.93527440  | 1.36969043  | 13.12693057 |
| C | 2.13001202  | 3.58126316  | 13.12693344 |
| C | 0.78145050  | 4.09289282  | 13.12693057 |
| C | -3.58388777 | 2.13487395  | 11.87820590 |
| C | -4.09808428 | 0.77954948  | 11.87820513 |
| C | -3.64079896 | -2.03630088 | 11.87820590 |
| C | -2.72415179 | -3.15927035 | 11.87820513 |
| C | -0.05691118 | -4.17117483 | 11.87820590 |
| C | 1.37393249  | -3.93881983 | 11.87820513 |
| C | 3.58388777  | -2.13487395 | 11.87820590 |
| C | 4.09808428  | -0.77954948 | 11.87820513 |
| C | 3.64079896  | 2.03630088  | 11.87820590 |
| C | 2.72415179  | 3.15927035  | 11.87820513 |
| C | 0.05691118  | 4.17117483  | 11.87820590 |
| C | -1.37393249 | 3.93881983  | 11.87820513 |
| C | -4.16743062 | 0.05442285  | 10.63013020 |
| C | -3.93605452 | -1.37038651 | 10.63013668 |
| C | -2.13084688 | -3.58188936 | 10.63013020 |
| C | -0.78123773 | -4.09391646 | 10.63013668 |
| C | 2.03658374  | -3.63631221 | 10.63013020 |
| C | 3.15481679  | -2.72352995 | 10.63013668 |
| C | 4.16743062  | -0.05442285 | 10.63013020 |
| C | 3.93605452  | 1.37038651  | 10.63013668 |
| C | 2.13084688  | 3.58188936  | 10.63013020 |
| C | 0.78123773  | 4.09391646  | 10.63013668 |
| C | -2.03658374 | 3.63631221  | 10.63013020 |
| C | -3.15481679 | 2.72352995  | 10.63013668 |
| C | -3.63496662 | -2.03676641 | 9.37618173  |
| C | -2.72343737 | -3.15346059 | 9.37619624  |
| C | -0.05359186 | -4.16635664 | 9.37618173  |
| C | 1.36925829  | -3.93529624 | 9.37619624  |
| C | 3.58137476  | -2.12959023 | 9.37618173  |
| C | 4.09269566  | -0.78183565 | 9.37619624  |
| C | 3.63496662  | 2.03676641  | 9.37618173  |
| C | 2.72343737  | 3.15346059  | 9.37619624  |
| C | 0.05359186  | 4.16635664  | 9.37618173  |
| C | -1.36925829 | 3.93529624  | 9.37619624  |
| C | -3.58137476 | 2.12959023  | 9.37618173  |
| C | -4.09269566 | 0.78183565  | 9.37619624  |
| C | -2.13465678 | -3.58420190 | 8.12661017  |
| C | -0.77991827 | -4.09817439 | 8.12662652  |
| C | 2.03668151  | -3.64076795 | 8.12661017  |
| C | 3.15916400  | -2.72451623 | 8.12662652  |
| C | 4.17133829  | -0.05656605 | 8.12661017  |
| C | 3.93908227  | 1.37365816  | 8.12662652  |
| C | 2.13465678  | 3.58420190  | 8.12661017  |
| C | 0.77991827  | 4.09817439  | 8.12662652  |
| C | -2.03668151 | 3.64076795  | 8.12661017  |
| C | -3.15916400 | 2.72451623  | 8.12662652  |
| C | -4.17133829 | 0.05656605  | 8.12661017  |

|   |             |             |            |
|---|-------------|-------------|------------|
| C | -3.93908227 | -1.37365816 | 8.12662652 |
| C | -0.05494830 | -4.16855711 | 6.87919020 |
| C | 1.37124362  | -3.93695458 | 6.87919603 |
| C | 3.58260221  | -2.13186518 | 6.87919020 |
| C | 4.09512449  | -0.78094548 | 6.87919603 |
| C | 3.63755051  | 2.03669193  | 6.87919020 |
| C | 2.72388087  | 3.15600910  | 6.87919603 |
| C | 0.05494830  | 4.16855711  | 6.87919020 |
| C | -1.37124362 | 3.93695458  | 6.87919603 |
| C | -3.58260221 | 2.13186518  | 6.87919020 |
| C | -4.09512449 | 0.78094548  | 6.87919603 |
| C | -3.63755051 | -2.03669193 | 6.87919020 |
| C | -2.72388087 | -3.15600910 | 6.87919603 |
| C | 2.03677656  | -3.63464103 | 5.62580449 |
| C | 3.15313748  | -2.72338075 | 5.62580095 |
| C | 4.16607974  | -0.05342027 | 5.62580449 |
| C | 3.93508565  | 1.36900679  | 5.62580095 |
| C | 2.12930318  | 3.58122075  | 5.62580449 |
| C | 0.78194817  | 4.09238753  | 5.62580095 |
| C | -2.03677656 | 3.63464103  | 5.62580449 |
| C | -3.15313748 | 2.72338075  | 5.62580095 |
| C | -4.16607974 | 0.05342027  | 5.62580449 |
| C | -3.93508565 | -1.36900679 | 5.62580095 |
| C | -2.12930318 | -3.58122075 | 5.62580449 |
| C | -0.78194817 | -4.09238753 | 5.62580095 |
| C | 3.58407419  | -2.13420439 | 4.37488176 |
| C | 4.09777698  | -0.78018032 | 4.37487277 |
| C | 3.64031231  | 2.03679710  | 4.37488176 |
| C | 2.72454447  | 3.15868881  | 4.37487277 |
| C | 0.05623812  | 4.17100149  | 4.37488176 |
| C | -1.37323252 | 3.93886913  | 4.37487277 |
| C | -3.58407419 | 2.13420439  | 4.37488176 |
| C | -4.09777698 | 0.78018032  | 4.37487277 |
| C | -3.64031231 | -2.03679710 | 4.37488176 |
| C | -2.72454447 | -3.15868881 | 4.37487277 |
| C | -0.05623812 | -4.17100149 | 4.37488176 |
| C | 1.37323252  | -3.93886913 | 4.37487277 |
| C | 4.16961162  | -0.05545604 | 3.12783203 |
| C | 3.93779736  | 1.37205051  | 3.12782028 |
| C | 2.13283215  | 3.58326157  | 3.12783203 |
| C | 0.78066808  | 4.09625780  | 3.12782028 |
| C | -2.03677947 | 3.63871761  | 3.12783203 |
| C | -3.15712928 | 2.72420730  | 3.12782028 |
| C | -4.16961162 | 0.05545604  | 3.12783203 |
| C | -3.93779736 | -1.37205051 | 3.12782028 |
| C | -2.13283215 | -3.58326157 | 3.12783203 |
| C | -0.78066808 | -4.09625780 | 3.12782028 |
| C | 2.03677947  | -3.63871761 | 3.12783203 |
| C | 3.15712928  | -2.72420730 | 3.12782028 |
| C | 3.63457225  | 2.03680314  | 1.87515875 |
| C | 2.72339949  | 3.15305763  | 1.87515742 |
| C | 0.05336287  | 4.16603347  | 1.87515875 |
| C | -1.36892827 | 3.93506196  | 1.87515742 |
| C | -3.58120939 | 2.12923033  | 1.87515875 |
| C | -4.09232775 | 0.78200432  | 1.87515742 |
| C | -3.63457225 | -2.03680314 | 1.87515875 |
| C | -2.72339949 | -3.15305763 | 1.87515742 |
| C | -0.05336287 | -4.16603347 | 1.87515875 |
| C | 1.36892827  | -3.93506196 | 1.87515742 |
| C | 3.58120939  | -2.12923033 | 1.87515875 |
| C | 4.09232775  | -0.78200432 | 1.87515742 |
| C | 2.13362932  | 3.58370307  | 0.62335168 |
| C | 0.78036134  | 4.09711895  | 0.62335920 |
| C | -2.03676324 | 3.63962873  | 0.62335168 |
| C | -3.15802843 | 2.72437222  | 0.62335920 |
| C | -4.17039256 | 0.05592566  | 0.62335168 |
| C | -3.93838976 | -1.37274674 | 0.62335920 |
| C | -2.13362932 | -3.58370307 | 0.62335168 |
| C | -0.78036134 | -4.09711895 | 0.62335920 |
| C | 2.03676324  | -3.63962873 | 0.62335168 |

|   |             |             |             |
|---|-------------|-------------|-------------|
| C | 3.15802843  | -2.72437222 | 0.62335920  |
| C | 4.17039256  | -0.05592566 | 0.62335168  |
| C | 3.93838976  | 1.37274674  | 0.62335920  |
| C | 0.05592555  | 4.17038220  | -0.62334552 |
| C | -1.37274449 | 3.93838080  | -0.62334404 |
| C | -3.58369415 | 2.13362405  | -0.62334552 |
| C | -4.09711007 | 0.78035880  | -0.62334404 |
| C | -3.63961970 | -2.03675815 | -0.62334552 |
| C | -2.72436558 | -3.15802200 | -0.62334404 |
| C | -0.05592555 | -4.17038220 | -0.62334552 |
| C | 1.37274449  | -3.93838080 | -0.62334404 |
| C | 3.58369415  | -2.13362405 | -0.62334552 |
| C | 4.09711007  | -0.78035880 | -0.62334404 |
| C | 3.63961970  | 2.03675815  | -0.62334552 |
| C | 2.72436558  | 3.15802200  | -0.62334404 |
| C | -2.03680742 | 3.63456491  | -1.87513076 |
| C | -3.15305770 | 2.72339280  | -1.87513564 |
| C | -4.16602925 | 0.05335548  | -1.87513076 |
| C | -3.93505620 | -1.36893167 | -1.87513564 |
| C | -2.12922183 | -3.58120942 | -1.87513076 |
| C | -0.78199850 | -4.09232447 | -1.87513564 |
| C | 2.03680742  | -3.63456491 | -1.87513076 |
| C | 3.15305770  | -2.72339280 | -1.87513564 |
| C | 4.16602925  | -0.05335548 | -1.87513076 |
| C | 3.93505620  | 1.36893167  | -1.87513564 |
| C | 2.12922183  | 3.58120942  | -1.87513076 |
| C | 0.78199850  | 4.09232447  | -1.87513564 |
| C | -3.58326407 | 2.13282824  | -3.12780735 |
| C | -4.09625933 | 0.78066740  | -3.12781547 |
| C | -3.63871548 | -2.03678359 | -3.12780735 |
| C | -2.72420747 | -3.15713093 | -3.12781547 |
| C | -0.05545141 | -4.16961184 | -3.12780735 |
| C | 1.37205186  | -3.93779834 | -3.12781547 |
| C | 3.58326407  | -2.13282824 | -3.12780735 |
| C | 4.09625933  | -0.78066740 | -3.12781547 |
| C | 3.63871548  | 2.03678359  | -3.12780735 |
| C | 2.72420747  | 3.15713093  | -3.12781547 |
| C | 0.05545141  | 4.16961184  | -3.12780735 |
| C | -1.37205186 | 3.93779834  | -3.12781547 |
| C | -4.17098218 | 0.05623573  | -4.37486294 |
| C | -3.93885128 | -1.37323387 | -4.37487401 |
| C | -2.13419266 | -3.58405866 | -4.37486294 |
| C | -0.78017022 | -4.09776220 | -4.37487401 |
| C | 2.03678952  | -3.64029439 | -4.37486294 |
| C | 3.15868106  | -2.72452833 | -4.37487401 |
| C | 4.17098218  | -0.05623573 | -4.37486294 |
| C | 3.93885128  | 1.37323387  | -4.37487401 |
| C | 2.13419266  | 3.58405866  | -4.37486294 |
| C | 0.78017022  | 4.09776220  | -4.37487401 |
| C | -2.03678952 | 3.64029439  | -4.37486294 |
| C | -3.15868106 | 2.72452833  | -4.37487401 |
| C | -3.63463387 | -2.03676979 | -5.62577888 |
| C | -2.72337669 | -3.15312836 | -5.62578788 |
| C | -0.05342255 | -4.16607016 | -5.62577888 |
| C | 1.36900092  | -3.93507758 | -5.62578788 |
| C | 3.58121131  | -2.12930037 | -5.62577888 |
| C | 4.09237761  | -0.78194922 | -5.62578788 |
| C | 3.63463387  | 2.03676979  | -5.62577888 |
| C | 2.72337669  | 3.15312836  | -5.62578788 |
| C | 0.05342255  | 4.16607016  | -5.62577888 |
| C | -1.36900092 | 3.93507758  | -5.62578788 |
| C | -3.58121131 | 2.12930037  | -5.62577888 |
| C | -4.09237761 | 0.78194922  | -5.62578788 |
| C | -2.13186198 | -3.58259479 | -6.87918077 |
| C | -0.78095417 | -4.09511675 | -6.87917935 |
| C | 2.03668711  | -3.63754403 | -6.87918077 |
| C | 3.15599806  | -2.72388453 | -6.87917935 |
| C | 4.16854909  | -0.05494924 | -6.87918077 |
| C | 3.93695223  | 1.37123223  | -6.87917935 |
| C | 2.13186198  | 3.58259479  | -6.87918077 |

|   |             |             |              |
|---|-------------|-------------|--------------|
| C | 0.78095417  | 4.09511675  | -6.87917935  |
| C | -2.03668711 | 3.63754403  | -6.87918077  |
| C | -3.15599806 | 2.72388453  | -6.87917935  |
| C | -4.16854909 | 0.05494924  | -6.87918077  |
| C | -3.93695223 | -1.37123223 | -6.87917935  |
| C | -0.05657293 | -4.17131098 | -8.12662350  |
| C | 1.37364915  | -3.93906101 | -8.12660634  |
| C | 3.58417482  | -2.13464908 | -8.12662350  |
| C | 4.09815148  | -0.77991545 | -8.12660634  |
| C | 3.64074774  | 2.03666190  | -8.12662350  |
| C | 2.72450233  | 3.15914557  | -8.12660634  |
| C | 0.05657293  | 4.17131098  | -8.12662350  |
| C | -1.37364915 | 3.93906101  | -8.12660634  |
| C | -3.58417482 | 2.13464908  | -8.12662350  |
| C | -4.09815148 | 0.77991545  | -8.12660634  |
| C | -3.64074774 | -2.03666190 | -8.12662350  |
| C | -2.72450233 | -3.15914557 | -8.12660634  |
| C | 2.03675878  | -3.63495943 | -9.37618433  |
| C | 3.15344786  | -2.72343105 | -9.37617258  |
| C | 4.16634660  | -0.05359487 | -9.37618433  |
| C | 3.93528440  | 1.36925043  | -9.37617258  |
| C | 2.12958781  | 3.58136456  | -9.37618433  |
| C | 0.78183655  | 4.09268148  | -9.37617258  |
| C | -2.03675878 | 3.63495943  | -9.37618433  |
| C | -3.15344786 | 2.72343105  | -9.37617258  |
| C | -4.16634660 | 0.05359487  | -9.37618433  |
| C | -3.93528440 | -1.36925043 | -9.37617258  |
| C | -2.12958781 | -3.58136456 | -9.37618433  |
| C | -0.78183655 | -4.09268148 | -9.37617258  |
| C | 3.58188233  | -2.13083847 | -10.63012346 |
| C | 4.09390612  | -0.78124390 | -10.63012016 |
| C | 3.63630142  | 2.03658186  | -10.63012346 |
| C | 2.72353012  | 3.15480475  | -10.63012016 |
| C | 0.05441908  | 4.16742033  | -10.63012346 |
| C | -1.37037599 | 3.93604865  | -10.63012016 |
| C | -3.58188233 | 2.13083847  | -10.63012346 |
| C | -4.09390612 | 0.78124390  | -10.63012016 |
| C | -3.63630142 | -2.03658186 | -10.63012346 |
| C | -2.72353012 | -3.15480475 | -10.63012016 |
| C | -0.05441908 | -4.16742033 | -10.63012346 |
| C | 1.37037599  | -3.93604865 | -10.63012016 |
| C | 4.17114571  | -0.05691216 | -11.87819891 |
| C | 3.93879671  | 1.37392582  | -11.87820368 |
| C | 2.13486023  | 3.58386207  | -11.87819891 |
| C | 0.77954369  | 4.09806092  | -11.87820368 |
| C | -2.03628548 | 3.64077423  | -11.87819891 |
| C | -3.15925302 | 2.72413510  | -11.87820368 |
| C | -4.17114571 | 0.05691216  | -11.87819891 |
| C | -3.93879671 | -1.37392582 | -11.87820368 |
| C | -2.13486023 | -3.58386207 | -11.87819891 |
| C | -0.77954369 | -4.09806092 | -11.87820368 |
| C | 2.03628548  | -3.64077423 | -11.87819891 |
| C | 3.15925302  | -2.72413510 | -11.87820368 |
| C | 3.63527065  | 2.03645583  | -13.12692403 |
| C | 2.72319523  | 3.15381408  | -13.12693165 |
| C | 0.05401285  | 4.16646465  | -13.12692403 |
| C | -1.36968549 | 3.93526329  | -13.12693165 |
| C | -3.58125781 | 2.13000882  | -13.12692403 |
| C | -4.09288073 | 0.78144921  | -13.12693165 |
| C | -3.63527065 | -2.03645583 | -13.12692403 |
| C | -2.72319523 | -3.15381408 | -13.12693165 |
| C | -0.05401285 | -4.16646465 | -13.12692403 |
| C | 1.36968549  | -3.93526329 | -13.12693165 |
| C | 3.58125781  | -2.13000882 | -13.12692403 |
| C | 4.09288073  | -0.78144921 | -13.12693165 |
| C | 2.13005906  | 3.58152837  | -14.38171801 |
| C | 0.78158826  | 4.09312361  | -14.38171501 |
| C | -2.03666503 | 3.63544944  | -14.38171801 |
| C | -3.15395490 | 2.72343710  | -14.38171501 |
| C | -4.16672409 | 0.05392107  | -14.38171801 |

|   |             |             |              |
|---|-------------|-------------|--------------|
| C | -3.93554316 | -1.36968651 | -14.38171501 |
| C | -2.13005906 | -3.58152837 | -14.38171801 |
| C | -0.78158826 | -4.09312361 | -14.38171501 |
| C | 2.03666503  | -3.63544944 | -14.38171801 |
| C | 3.15395490  | -2.72343710 | -14.38171501 |
| C | 4.16672409  | -0.05392107 | -14.38171801 |
| C | 3.93554316  | 1.36968651  | -14.38171501 |
| C | 0.05696171  | 4.17176915  | -15.63079620 |
| C | -1.37417290 | 3.93937353  | -15.63079454 |
| C | -3.58437721 | 2.13521486  | -15.63079620 |
| C | -4.09868400 | 0.77961812  | -15.63079454 |
| C | -3.64133892 | -2.03655429 | -15.63079620 |
| C | -2.72451110 | -3.15975541 | -15.63079454 |
| C | -0.05696171 | -4.17176915 | -15.63079620 |
| C | 1.37417290  | -3.93937353 | -15.63079454 |
| C | 3.58437721  | -2.13521486 | -15.63079620 |
| C | 4.09868400  | -0.77961812 | -15.63079454 |
| C | 3.64133892  | 2.03655429  | -15.63079620 |
| C | 2.72451110  | 3.15975541  | -15.63079454 |
| C | -2.03605122 | 3.63558244  | -16.87836122 |
| C | -3.15419575 | 2.72286592  | -16.87835115 |
| C | -4.16653236 | 0.05451914  | -16.87836122 |
| C | -3.93516893 | -1.37018069 | -16.87835115 |
| C | -2.13048114 | -3.58106330 | -16.87836122 |
| C | -0.78097318 | -4.09304661 | -16.87835115 |
| C | 2.03605122  | -3.63558244 | -16.87836122 |
| C | 3.15419575  | -2.72286592 | -16.87835115 |
| C | 4.16653236  | -0.05451914 | -16.87836122 |
| C | 3.93516893  | 1.37018069  | -16.87835115 |
| C | 2.13048114  | 3.58106330  | -16.87836122 |
| C | 0.78097318  | 4.09304661  | -16.87835115 |
| C | -3.57975228 | 2.12822107  | -18.13307024 |
| C | -4.09057355 | 0.78178298  | -18.13306341 |
| C | -3.63296965 | -2.03604588 | -18.13307024 |
| C | -2.72233070 | -3.15164912 | -18.13306341 |
| C | -0.05321737 | -4.16426695 | -18.13307024 |
| C | 1.36824285  | -3.93343210 | -18.13306341 |
| C | 3.57975228  | -2.12822107 | -18.13307024 |
| C | 4.09057355  | -0.78178298 | -18.13306341 |
| C | 3.63296965  | 2.03604588  | -18.13307024 |
| C | 2.72233070  | 3.15164912  | -18.13306341 |
| C | 0.05321737  | 4.16426695  | -18.13307024 |
| C | -1.36824285 | 3.93343210  | -18.13306341 |
| C | -4.17169981 | 0.05699969  | -19.38330758 |
| C | -3.93930808 | -1.37416565 | -19.38330954 |
| C | -2.13521309 | -3.58429816 | -19.38330758 |
| C | -0.77959168 | -4.09862370 | -19.38330954 |
| C | 2.03648672  | -3.64129786 | -19.38330758 |
| C | 3.15971640  | -2.72445805 | -19.38330954 |
| C | 4.17169981  | -0.05699969 | -19.38330758 |
| C | 3.93930808  | 1.37416565  | -19.38330954 |
| C | 2.13521309  | 3.58429816  | -19.38330758 |
| C | 0.77959168  | 4.09862370  | -19.38330954 |
| C | -2.03648672 | 3.64129786  | -19.38330758 |
| C | -3.15971640 | 2.72445805  | -19.38330954 |
| C | -3.63803590 | -2.03674384 | -20.62902374 |
| C | -2.72402369 | -3.15647706 | -20.62902104 |
| C | -0.05514604 | -4.16900343 | -20.62902374 |
| C | 1.37157747  | -3.93731225 | -20.62902104 |
| C | 3.58288986  | -2.13225959 | -20.62902374 |
| C | 4.09560116  | -0.78083519 | -20.62902104 |
| C | 3.63803590  | 2.03674384  | -20.62902374 |
| C | 2.72402369  | 3.15647706  | -20.62902104 |
| C | 0.05514604  | 4.16900343  | -20.62902374 |
| C | -1.37157747 | 3.93731225  | -20.62902104 |
| C | -3.58288986 | 2.13225959  | -20.62902374 |
| C | -4.09560116 | 0.78083519  | -20.62902104 |
| C | -2.12706827 | -3.57983657 | -21.88338325 |
| C | -0.78271284 | -4.08986236 | -21.88339244 |
| C | 2.03669528  | -3.63201344 | -21.88338325 |

|   |             |             |              |
|---|-------------|-------------|--------------|
| C | 3.15056828  | -2.72278038 | -21.88339244 |
| C | 4.16376355  | -0.05217687 | -21.88338325 |
| C | 3.93328112  | 1.36708197  | -21.88339244 |
| C | 2.12706827  | 3.57983657  | -21.88338325 |
| C | 0.78271284  | 4.08986236  | -21.88339244 |
| C | -2.03669528 | 3.63201344  | -21.88338325 |
| C | -3.15056828 | 2.72278038  | -21.88339244 |
| C | -4.16376355 | 0.05217687  | -21.88338325 |
| C | -3.93328112 | -1.36708197 | -21.88339244 |
| C | -0.05721771 | -4.17000827 | -23.13593772 |
| C | 1.37386796  | -3.93762019 | -23.13596035 |
| C | 3.58272424  | -2.13455612 | -23.13593772 |
| C | 4.09701310  | -0.77900554 | -23.13596035 |
| C | 3.63994195  | 2.03545215  | -23.13593772 |
| C | 2.72314514  | 3.15861465  | -23.13596035 |
| C | 0.05721771  | 4.17000827  | -23.13593772 |
| C | -1.37386796 | 3.93762019  | -23.13596035 |
| C | -3.58272424 | 2.13455612  | -23.13593772 |
| C | -4.09701310 | 0.77900554  | -23.13596035 |
| C | -3.63994195 | -2.03545215 | -23.13593772 |
| C | -2.72314514 | -3.15861465 | -23.13596035 |
| C | 2.03348461  | -3.63551764 | -24.37972378 |
| C | 3.15464641  | -2.72035353 | -24.37975033 |
| C | 4.16519293  | -0.05670949 | -24.37972378 |
| C | 3.93321847  | 1.37182716  | -24.37975033 |
| C | 2.13170833  | 3.57880814  | -24.37972378 |
| C | 0.77857206  | 4.09218069  | -24.37975033 |
| C | -2.03348461 | 3.63551764  | -24.37972378 |
| C | -3.15464641 | 2.72035353  | -24.37975033 |
| C | -4.16519293 | 0.05670949  | -24.37972378 |
| C | -3.93321847 | -1.37182716 | -24.37975033 |
| C | -2.13170833 | -3.57880814 | -24.37972378 |
| C | -0.77857206 | -4.09218069 | -24.37975033 |
| C | 3.56814349  | -2.11860236 | -25.63346370 |
| C | 4.07549183  | -0.78127395 | -25.63346486 |
| C | 3.61883521  | 2.03080173  | -25.63346370 |
| C | 2.71434900  | 3.13884248  | -25.63346486 |
| C | 0.05069172  | 4.14940409  | -25.63346370 |
| C | -1.36114282 | 3.92011643  | -25.63346486 |
| C | -3.56814349 | 2.11860236  | -25.63346370 |
| C | -4.07549183 | 0.78127395  | -25.63346486 |
| C | -3.61883521 | -2.03080173 | -25.63346370 |
| C | -2.71434900 | -3.13884248 | -25.63346486 |
| C | -0.05069172 | -4.14940409 | -25.63346370 |
| C | 1.36114282  | -3.92011643 | -25.63346486 |
| C | 4.16191222  | -0.05976300 | -26.89436381 |
| C | 3.92913979  | 1.37369778  | -26.89436110 |
| C | 2.13271238  | 3.57444021  | -26.89436381 |
| C | 0.77491272  | 4.08958376  | -26.89436110 |
| C | -2.02919983 | 3.63420321  | -26.89436381 |
| C | -3.15422707 | 2.71588598  | -26.89436110 |
| C | -4.16191222 | 0.05976300  | -26.89436381 |
| C | -3.92913979 | -1.37369778 | -26.89436110 |
| C | -2.13271238 | -3.57444021 | -26.89436381 |
| C | -0.77491272 | -4.08958376 | -26.89436110 |
| C | 2.02919983  | -3.63420321 | -26.89436381 |
| C | 3.15422707  | -2.71588598 | -26.89436110 |
| C | 3.67722042  | 2.05327676  | -28.13447497 |
| C | 2.74808285  | 3.19155406  | -28.13447519 |
| C | 0.06042038  | 4.21120468  | -28.13447497 |
| C | -1.38992547 | 3.97568659  | -28.13447519 |
| C | -3.61680004 | 2.15792792  | -28.13447497 |
| C | -4.13800832 | 0.78413253  | -28.13447519 |
| C | -3.67722042 | -2.05327676 | -28.13447497 |
| C | -2.74808285 | -3.19155406 | -28.13447519 |
| C | -0.06042038 | -4.21120468 | -28.13447497 |
| C | 1.38992547  | -3.97568659 | -28.13447519 |
| C | 3.61680004  | -2.15792792 | -28.13447497 |
| C | 4.13800832  | -0.78413253 | -28.13447519 |
| C | 2.14121393  | 3.69345057  | -29.34996523 |

|   |             |             |              |
|---|-------------|-------------|--------------|
| C | 0.84747232  | 4.18426358  | -29.34996944 |
| C | -2.12801506 | 3.70107095  | -29.34996523 |
| C | -3.19994240 | 2.82606435  | -29.34996944 |
| C | -4.26922899 | 0.00762037  | -29.34996523 |
| C | -4.04741472 | -1.35819923 | -29.34996944 |
| C | -2.14121393 | -3.69345057 | -29.34996523 |
| C | -0.84747232 | -4.18426358 | -29.34996944 |
| C | 2.12801506  | -3.70107095 | -29.34996523 |
| C | 3.19994240  | -2.82606435 | -29.34996944 |
| C | 4.26922899  | -0.00762037 | -29.34996523 |
| C | 4.04741472  | 1.35819923  | -29.34996944 |
| H | 0.52500223  | 4.41900885  | 30.30610191  |
| H | -1.89638797 | 4.02577622  | 30.30610727  |
| H | -3.56447281 | 2.66416970  | 30.30610191  |
| H | -4.43461846 | 0.37056795  | 30.30610727  |
| H | -4.08947504 | -1.75483916 | 30.30610191  |
| H | -2.53823049 | -3.65520826 | 30.30610727  |
| H | -0.52500223 | -4.41900885 | 30.30610191  |
| H | 1.89638797  | -4.02577622 | 30.30610727  |
| H | 3.56447281  | -2.66416970 | 30.30610191  |
| H | 4.43461846  | -0.37056795 | 30.30610727  |
| H | 4.08947504  | 1.75483916  | 30.30610191  |
| H | 2.53823049  | 3.65520826  | 30.30610727  |
| H | 2.66416651  | 3.56447646  | -30.30610664 |
| H | 0.37058172  | 4.43462672  | -30.30610827 |
| H | -1.75484391 | 4.08947410  | -30.30610664 |
| H | -3.65520854 | 2.53824655  | -30.30610827 |
| H | -4.41901042 | 0.52499765  | -30.30610664 |
| H | -4.02579026 | -1.89638017 | -30.30610827 |
| H | -2.66416651 | -3.56447646 | -30.30610664 |
| H | -0.37058172 | -4.43462672 | -30.30610827 |
| H | 1.75484391  | -4.08947410 | -30.30610664 |
| H | 3.65520854  | -2.53824655 | -30.30610827 |
| H | 4.41901042  | -0.52499765 | -30.30610664 |
| H | 4.02579026  | 1.89638017  | -30.30610827 |

Nanotube (6,6) u24v6s  
B3LYP/STO-3G Energy: -22150.967471

|   |             |             |             |
|---|-------------|-------------|-------------|
| C | 0.00197906  | 4.27474139  | 29.98248461 |
| C | -1.36261234 | 4.05143068  | 29.98272800 |
| C | -3.70104511 | 2.13908461  | 29.98248461 |
| C | -4.18994806 | 0.84565844  | 29.98272800 |
| C | -3.70302417 | -2.13565678 | 29.98248461 |
| C | -2.82733573 | -3.20577224 | 29.98272800 |
| C | -0.00197906 | -4.27474139 | 29.98248461 |
| C | 1.36261234  | -4.05143068 | 29.98272800 |
| C | 3.70104511  | -2.13908461 | 29.98248461 |
| C | 4.18994806  | -0.84565844 | 29.98272800 |
| C | 3.70302417  | 2.13565678  | 29.98248461 |
| C | 2.82733573  | 3.20577224  | 29.98272800 |
| C | -2.05793970 | 3.67408040  | 28.76647494 |
| C | -3.19356365 | 2.74494036  | 28.76604482 |
| C | -4.21081681 | 0.05481214  | 28.76647494 |
| C | -3.97396991 | -1.39323707 | 28.76604482 |
| C | -2.15287711 | -3.61926826 | 28.76647494 |
| C | -0.78040626 | -4.13817743 | 28.76604482 |
| C | 2.05793970  | -3.67408040 | 28.76647494 |
| C | 3.19356365  | -2.74494036 | 28.76604482 |
| C | 4.21081681  | -0.05481214 | 28.76647494 |
| C | 3.97396991  | 1.39323707  | 28.76604482 |
| C | 2.15287711  | 3.61926826  | 28.76647494 |
| C | 0.78040626  | 4.13817743  | 28.76604482 |
| C | -3.57613762 | 2.12841777  | 27.52555339 |
| C | -4.08984940 | 0.76944248  | 27.52567263 |
| C | -3.63133267 | -2.03281714 | 27.52555339 |
| C | -2.71128144 | -3.15719224 | 27.52567263 |
| C | -0.05519505 | -4.16123491 | 27.52555339 |



|   |             |             |             |
|---|-------------|-------------|-------------|
| C | 1.37856796  | -3.92663472 | 27.52567263 |
| C | 3.57613762  | -2.12841777 | 27.52555339 |
| C | 4.08984940  | -0.76944248 | 27.52567263 |
| C | 3.63133267  | 2.03281714  | 27.52555339 |
| C | 2.71128144  | 3.15719224  | 27.52567263 |
| C | 0.05519505  | 4.16123491  | 27.52555339 |
| C | -1.37856796 | 3.92663472  | 27.52567263 |
| C | -4.14714150 | 0.04534812  | 26.26522437 |
| C | -3.91620681 | -1.36529969 | 26.26509882 |
| C | -2.11284337 | -3.56885583 | 26.26522437 |
| C | -0.77571919 | -4.07418443 | 26.26509882 |
| C | 2.03429813  | -3.61420395 | 26.26522437 |
| C | 3.14048762  | -2.70888473 | 26.26509882 |
| C | 4.14714150  | -0.04534812 | 26.26522437 |
| C | 3.91620681  | 1.36529969  | 26.26509882 |
| C | 2.11284337  | 3.56885583  | 26.26522437 |
| C | 0.77571919  | 4.07418443  | 26.26509882 |
| C | -2.03429813 | 3.61420395  | 26.26522437 |
| C | -3.14048762 | 2.70888473  | 26.26509882 |
| C | -3.63044967 | -2.03817795 | 25.00955391 |
| C | -2.71560152 | -3.15602781 | 25.00956092 |
| C | -0.05011096 | -4.16315062 | 25.00955391 |
| C | 1.37539950  | -3.92979381 | 25.00956092 |
| C | 3.58033872  | -2.12497267 | 25.00955391 |
| C | 4.09100102  | -0.77376600 | 25.00956092 |
| C | 3.63044967  | 2.03817795  | 25.00955391 |
| C | 2.71560152  | 3.15602781  | 25.00956092 |
| C | 0.05011096  | 4.16315062  | 25.00955391 |
| C | -1.37539950 | 3.92979381  | 25.00956092 |
| C | -3.58033872 | 2.12497267  | 25.00955391 |
| C | -4.09100102 | 0.77376600  | 25.00956092 |
| C | -2.13045095 | -3.58685067 | 23.76519535 |
| C | -0.77382210 | -4.09950505 | 23.76515491 |
| C | 2.04107833  | -3.63844998 | 23.76519535 |
| C | 3.16336447  | -2.71990212 | 23.76515491 |
| C | 4.17152928  | -0.05159931 | 23.76519535 |
| C | 3.93718656  | 1.37960293  | 23.76515491 |
| C | 2.13045095  | 3.58685067  | 23.76519535 |
| C | 0.77382210  | 4.09950505  | 23.76515491 |
| C | -2.04107833 | 3.63844998  | 23.76519535 |
| C | -3.16336447 | 2.71990212  | 23.76515491 |
| C | -4.17152928 | 0.05159931  | 23.76519535 |
| C | -3.93718656 | -1.37960293 | 23.76515491 |
| C | -0.04667219 | -4.16446216 | 22.51404004 |
| C | 1.37262262  | -3.93202998 | 22.51405818 |
| C | 3.58319393  | -2.12265039 | 22.51404004 |
| C | 4.09154916  | -0.77728893 | 22.51405818 |
| C | 3.62986612  | 2.04181178  | 22.51404004 |
| C | 2.71892654  | 3.15474105  | 22.51405818 |
| C | 0.04667219  | 4.16446216  | 22.51404004 |
| C | -1.37262262 | 3.93202998  | 22.51405818 |
| C | -3.58319393 | 2.12265039  | 22.51404004 |
| C | -4.09154916 | 0.77728893  | 22.51405818 |
| C | -3.62986612 | -2.04181178 | 22.51404004 |
| C | -2.71892654 | -3.15474105 | 22.51405818 |
| C | 2.04139204  | -3.63283124 | 21.25853217 |
| C | 3.15778678  | -2.71919006 | 21.25854063 |
| C | 4.16682016  | -0.04851825 | 21.25853217 |
| C | 3.93378106  | 1.37512854  | 21.25854063 |
| C | 2.12542812  | 3.58431299  | 21.25853217 |
| C | 0.77599428  | 4.09431860  | 21.25854063 |
| C | -2.04139204 | 3.63283124  | 21.25853217 |
| C | -3.15778678 | 2.71919006  | 21.25854063 |
| C | -4.16682016 | 0.04851825  | 21.25853217 |
| C | -3.93378106 | -1.37512854 | 21.25854063 |
| C | -2.12542812 | -3.58431299 | 21.25853217 |
| C | -0.77599428 | -4.09431860 | 21.25854063 |
| C | 3.58742036  | -2.13060977 | 20.01136986 |
| C | 4.10015331  | -0.77416236 | 20.01137625 |
| C | 3.63887236  | 2.04149229  | 20.01136986 |

|   |             |             |             |
|---|-------------|-------------|-------------|
| C | 2.72052092  | 3.16375574  | 20.01137625 |
| C | 0.05145200  | 4.17210205  | 20.01136986 |
| C | -1.37963238 | 3.93791810  | 20.01137625 |
| C | -3.58742036 | 2.13060977  | 20.01136986 |
| C | -4.10015331 | 0.77416236  | 20.01137625 |
| C | -3.63887236 | -2.04149229 | 20.01136986 |
| C | -2.72052092 | -3.16375574 | 20.01137625 |
| C | -0.05145200 | -4.17210205 | 20.01136986 |
| C | 1.37963238  | -3.93791810 | 20.01137625 |
| C | 4.16612862  | -0.04798755 | 18.76261791 |
| C | 3.93320436  | 1.37442319  | 18.76259207 |
| C | 2.12462274  | 3.58397945  | 18.76261791 |
| C | 0.77631678  | 4.09346648  | 18.76259207 |
| C | -2.04150588 | 3.63196699  | 18.76261791 |
| C | -3.15688757 | 2.71904330  | 18.76259207 |
| C | -4.16612862 | 0.04798755  | 18.76261791 |
| C | -3.93320436 | -1.37442319 | 18.76259207 |
| C | -2.12462274 | -3.58397945 | 18.76261791 |
| C | -0.77631678 | -4.09346648 | 18.76259207 |
| C | 2.04150588  | -3.63196699 | 18.76261791 |
| C | 3.15688757  | -2.71904330 | 18.76259207 |
| C | 3.63092357  | 2.04115864  | 17.50734282 |
| C | 2.71847207  | 3.15595445  | 17.50736452 |
| C | 0.04776655  | 4.16505137  | 17.50734282 |
| C | -1.37390069 | 3.93224310  | 17.50736452 |
| C | -3.58315702 | 2.12389273  | 17.50734282 |
| C | -4.09237277 | 0.77628865  | 17.50736452 |
| C | -3.63092357 | -2.04115864 | 17.50734282 |
| C | -2.71847207 | -3.15595445 | 17.50736452 |
| C | -0.04776655 | -4.16505137 | 17.50734282 |
| C | 1.37390069  | -3.93224310 | 17.50736452 |
| C | 3.58315702  | -2.12389273 | 17.50734282 |
| C | 4.09237277  | -0.77628865 | 17.50736452 |
| C | 2.12954137  | 3.58638845  | 16.25788517 |
| C | 0.77415586  | 4.09846415  | 16.25790130 |
| C | -2.04113282 | 3.63743115  | 16.25788517 |
| C | -3.16229614 | 2.71967071  | 16.25790130 |
| C | -4.17067419 | 0.05104270  | 16.25788517 |
| C | -3.93645200 | -1.37879343 | 16.25790130 |
| C | -2.12954137 | -3.58638845 | 16.25788517 |
| C | -0.77415586 | -4.09846415 | 16.25790130 |
| C | 2.04113282  | -3.63743115 | 16.25788517 |
| C | 3.16229614  | -2.71967071 | 16.25790130 |
| C | 4.17067419  | -0.05104270 | 16.25788517 |
| C | 3.93645200  | 1.37879343  | 16.25790130 |
| C | 0.04885361  | 4.16752552  | 15.01031250 |
| C | -1.37578433 | 3.93418681  | 15.01029673 |
| C | -3.58475616 | 2.12607122  | 15.01031250 |
| C | -4.09499788 | 0.77562923  | 15.01029673 |
| C | -3.63360977 | -2.04145429 | 15.01031250 |
| C | -2.71921355 | -3.15855758 | 15.01029673 |
| C | -0.04885361 | -4.16752552 | 15.01031250 |
| C | 1.37578433  | -3.93418681 | 15.01029673 |
| C | 3.58475616  | -2.12607122 | 15.01031250 |
| C | 4.09499788  | -0.77562923 | 15.01029673 |
| C | 3.63360977  | 2.04145429  | 15.01031250 |
| C | 2.71921355  | 3.15855758  | 15.01029673 |
| C | -2.04154234 | 3.63068699  | 13.75606363 |
| C | -3.15570713 | 2.71872293  | 13.75610246 |
| C | -4.16503834 | 0.04731596  | 13.75606363 |
| C | -3.93233668 | -1.37356108 | 13.75610246 |
| C | -2.12349599 | -3.58337103 | 13.75606363 |
| C | -0.77662956 | -4.09228400 | 13.75610246 |
| C | 2.04154234  | -3.63068699 | 13.75606363 |
| C | 3.15570713  | -2.71872293 | 13.75610246 |
| C | 4.16503834  | -0.04731596 | 13.75606363 |
| C | 3.93233668  | 1.37356108  | 13.75610246 |
| C | 2.12349599  | 3.58337103  | 13.75606363 |
| C | 0.77662956  | 4.09228400  | 13.75610246 |
| C | -3.58603532 | 2.12868020  | 12.50488489 |

|   |             |             |             |
|---|-------------|-------------|-------------|
| C | -4.09765231 | 0.77450716  | 12.50486615 |
| C | -3.63650879 | -2.04125759 | 12.50488489 |
| C | -2.71956903 | -3.16141742 | 12.50486615 |
| C | -0.05047347 | -4.16993779 | 12.50488489 |
| C | 1.37808328  | -3.93592458 | 12.50486615 |
| C | 3.58603532  | -2.12868020 | 12.50488489 |
| C | 4.09765231  | -0.77450716 | 12.50486615 |
| C | 3.63650879  | 2.04125759  | 12.50488489 |
| C | 2.71956903  | 3.16141742  | 12.50486615 |
| C | 0.05047347  | 4.16993779  | 12.50488489 |
| C | -1.37808328 | 3.93592458  | 12.50486615 |
| C | -4.16844097 | 0.04964414  | 11.25769406 |
| C | -3.93484510 | -1.37683060 | 11.25772047 |
| C | -2.12721357 | -3.58515371 | 11.25769406 |
| C | -0.77505228 | -4.09609112 | 11.25772047 |
| C | 2.04122740  | -3.63479785 | 11.25769406 |
| C | 3.15979282  | -2.71926052 | 11.25772047 |
| C | 4.16844097  | -0.04964414 | 11.25769406 |
| C | 3.93484510  | 1.37683060  | 11.25772047 |
| C | 2.12721357  | 3.58515371  | 11.25769406 |
| C | 0.77505228  | 4.09609112  | 11.25772047 |
| C | -2.04122740 | 3.63479785  | 11.25769406 |
| C | -3.15979282 | 2.71926052  | 11.25772047 |
| C | -3.63036257 | -2.04145423 | 10.00487205 |
| C | -2.71862147 | -3.15540693 | 10.00487218 |
| C | -0.04723006 | -4.16471332 | 10.00487205 |
| C | 1.37335183  | -3.93209873 | 10.00487218 |
| C | 3.58313251  | -2.12325909 | 10.00487205 |
| C | 4.09197330  | -0.77669179 | 10.00487218 |
| C | 3.63036257  | 2.04145423  | 10.00487205 |
| C | 2.71862147  | 3.15540693  | 10.00487218 |
| C | 0.04723006  | 4.16471332  | 10.00487205 |
| C | -1.37335183 | 3.93209873  | 10.00487218 |
| C | -3.58313251 | 2.12325909  | 10.00487205 |
| C | -4.09197330 | 0.77669179  | 10.00487218 |
| C | -2.12754918 | -3.58548083 | 8.75256564  |
| C | -0.77500984 | -4.09653462 | 8.75255314  |
| C | 2.04134290  | -3.63525206 | 8.75256564  |
| C | 3.16019813  | -2.71944552 | 8.75255314  |
| C | 4.16889208  | -0.04977122 | 8.75256564  |
| C | 3.93520797  | 1.37708910  | 8.75255314  |
| C | 2.12754918  | 3.58548083  | 8.75256564  |
| C | 0.77500984  | 4.09653462  | 8.75255314  |
| C | -2.04134290 | 3.63525206  | 8.75256564  |
| C | -3.16019813 | 2.71944552  | 8.75255314  |
| C | -4.16889208 | 0.04977122  | 8.75256564  |
| C | -3.93520797 | -1.37708910 | 8.75255314  |
| C | -0.05027213 | -4.16949894 | 7.50539384  |
| C | 1.37771609  | -3.93568201 | 7.50544286  |
| C | 3.58575593  | -2.12828641 | 7.50539384  |
| C | 4.09725864  | -0.77470387 | 7.50544286  |
| C | 3.63602806  | 2.04121253  | 7.50539384  |
| C | 2.71954255  | 3.16097814  | 7.50544286  |
| C | 0.05027213  | 4.16949894  | 7.50539384  |
| C | -1.37771609 | 3.93568201  | 7.50544286  |
| C | -3.58575593 | 2.12828641  | 7.50539384  |
| C | -4.09725864 | 0.77470387  | 7.50544286  |
| C | -3.63602806 | -2.04121253 | 7.50539384  |
| C | -2.71954255 | -3.16097814 | 7.50544286  |
| C | 2.04138296  | -3.63077565 | 6.25393570  |
| C | 3.15573548  | -2.71869963 | 6.25389097  |
| C | 4.16503543  | -0.04749832 | 6.25393570  |
| C | 3.93233068  | 1.37359728  | 6.25389097  |
| C | 2.12365247  | 3.58327733  | 6.25393570  |
| C | 0.77659520  | 4.09229691  | 6.25389097  |
| C | -2.04138296 | 3.63077565  | 6.25393570  |
| C | -3.15573548 | 2.71869963  | 6.25389097  |
| C | -4.16503543 | 0.04749832  | 6.25393570  |
| C | -3.93233068 | -1.37359728 | 6.25389097  |
| C | -2.12365247 | -3.58327733 | 6.25393570  |

|   |             |             |             |
|---|-------------|-------------|-------------|
| C | -0.77659520 | -4.09229691 | 6.25389097  |
| C | 3.58480491  | -2.12642842 | 5.00044922  |
| C | 4.09523184  | -0.77552830 | 5.00047746  |
| C | 3.63394349  | 2.04131790  | 5.00044922  |
| C | 2.71924313  | 3.15881066  | 5.00047746  |
| C | 0.04913858  | 4.16774633  | 5.00044922  |
| C | -1.37598871 | 3.93433896  | 5.00047746  |
| C | -3.58480491 | 2.12642842  | 5.00044922  |
| C | -4.09523184 | 0.77552830  | 5.00047746  |
| C | -3.63394349 | -2.04131790 | 5.00044922  |
| C | -2.71924313 | -3.15881066 | 5.00047746  |
| C | -0.04913858 | -4.16774633 | 5.00044922  |
| C | 1.37598871  | -3.93433896 | 5.00047746  |
| C | 4.17015652  | -0.05070039 | 3.75273276  |
| C | 3.93612613  | 1.37820013  | 3.75272597  |
| C | 2.12898609  | 3.58611129  | 3.75273276  |
| C | 0.77450674  | 4.09788528  | 3.75272597  |
| C | -2.04117043 | 3.63681168  | 3.75273276  |
| C | -3.16161939 | 2.71968516  | 3.75272597  |
| C | -4.17015652 | 0.05070039  | 3.75273276  |
| C | -3.93612613 | -1.37820013 | 3.75272597  |
| C | -2.12898609 | -3.58611129 | 3.75273276  |
| C | -0.77450674 | -4.09788528 | 3.75272597  |
| C | 2.04117043  | -3.63681168 | 3.75273276  |
| C | 3.16161939  | -2.71968516 | 3.75272597  |
| C | 3.63156497  | 2.04134620  | 2.50271113  |
| C | 2.71884059  | 3.15641074  | 2.50271936  |
| C | 0.04792481  | 4.16570062  | 2.50271113  |
| C | -1.37411159 | 3.93279040  | 2.50271936  |
| C | -3.58364015 | 2.12435441  | 2.50271113  |
| C | -4.09295219 | 0.77637965  | 2.50271936  |
| C | -3.63156497 | -2.04134620 | 2.50271113  |
| C | -2.71884059 | -3.15641074 | 2.50271936  |
| C | -0.04792481 | -4.16570062 | 2.50271113  |
| C | 1.37411159  | -3.93279040 | 2.50271936  |
| C | 3.58364015  | -2.12435441 | 2.50271113  |
| C | 4.09295219  | -0.77637965 | 2.50271936  |
| C | 2.12532767  | 3.58415758  | 1.24875869  |
| C | 0.77600408  | 4.09396657  | 1.24876244  |
| C | -2.04130768 | 3.63266654  | 1.24875869  |
| C | -3.15747701 | 2.71902254  | 1.24876244  |
| C | -4.16663535 | 0.04850896  | 1.24875869  |
| C | -3.93348110 | -1.37494404 | 1.24876244  |
| C | -2.12532767 | -3.58415758 | 1.24875869  |
| C | -0.77600408 | -4.09396657 | 1.24876244  |
| C | 2.04130768  | -3.63266654 | 1.24875869  |
| C | 3.15747701  | -2.71902254 | 1.24876244  |
| C | 4.16663535  | -0.04850896 | 1.24875869  |
| C | 3.93348110  | 1.37494404  | 1.24876244  |
| C | 0.05087723  | 4.17037950  | 0.00000000  |
| C | -1.37837093 | 3.93625144  | 0.00000000  |
| C | -3.58621598 | 2.12925073  | 0.00000000  |
| C | -4.09807921 | 0.77442148  | 0.00000000  |
| C | -3.63709321 | -2.04112878 | 0.00000000  |
| C | -2.71970827 | -3.16182996 | 0.00000000  |
| C | -0.05087723 | -4.17037950 | 0.00000000  |
| C | 1.37837093  | -3.93625144 | 0.00000000  |
| C | 3.58621598  | -2.12925073 | 0.00000000  |
| C | 4.09807921  | -0.77442148 | 0.00000000  |
| C | 3.63709321  | 2.04112878  | 0.00000000  |
| C | 2.71970827  | 3.16182996  | 0.00000000  |
| C | -2.04130768 | 3.63266654  | -1.24875869 |
| C | -3.15747701 | 2.71902254  | -1.24876244 |
| C | -4.16663535 | 0.04850896  | -1.24875869 |
| C | -3.93348110 | -1.37494404 | -1.24876244 |
| C | -2.12532767 | -3.58415758 | -1.24875869 |
| C | -0.77600408 | -4.09396657 | -1.24876244 |
| C | 2.04130768  | -3.63266654 | -1.24875869 |
| C | 3.15747701  | -2.71902254 | -1.24876244 |
| C | 4.16663535  | -0.04850896 | -1.24875869 |

|   |             |             |             |
|---|-------------|-------------|-------------|
| C | 3.93348110  | 1.37494404  | -1.24876244 |
| C | 2.12532767  | 3.58415758  | -1.24875869 |
| C | 0.77600408  | 4.09396657  | -1.24876244 |
| C | -3.58364015 | 2.12435441  | -2.50271113 |
| C | -4.09295219 | 0.77637965  | -2.50271936 |
| C | -3.63156497 | -2.04134620 | -2.50271113 |
| C | -2.71884059 | -3.15641074 | -2.50271936 |
| C | -0.04792481 | -4.16570062 | -2.50271113 |
| C | 1.37411159  | -3.93279040 | -2.50271936 |
| C | 3.58364015  | -2.12435441 | -2.50271113 |
| C | 4.09295219  | -0.77637965 | -2.50271936 |
| C | 3.63156497  | 2.04134620  | -2.50271113 |
| C | 2.71884059  | 3.15641074  | -2.50271936 |
| C | 0.04792481  | 4.16570062  | -2.50271113 |
| C | -1.37411159 | 3.93279040  | -2.50271936 |
| C | -4.17015652 | 0.05070039  | -3.75273276 |
| C | -3.93612613 | -1.37820013 | -3.75272597 |
| C | -2.12898609 | -3.58611129 | -3.75273276 |
| C | -0.77450674 | -4.09788528 | -3.75272597 |
| C | 2.04117043  | -3.63681168 | -3.75273276 |
| C | 3.16161939  | -2.71968516 | -3.75272597 |
| C | 4.17015652  | -0.05070039 | -3.75273276 |
| C | 3.93612613  | 1.37820013  | -3.75272597 |
| C | 2.12898609  | 3.58611129  | -3.75273276 |
| C | 0.77450674  | 4.09788528  | -3.75272597 |
| C | -2.04117043 | 3.63681168  | -3.75273276 |
| C | -3.16161939 | 2.71968516  | -3.75272597 |
| C | -3.63394349 | -2.04131790 | -5.00044922 |
| C | -2.71924313 | -3.15881066 | -5.00047746 |
| C | -0.04913858 | -4.16774633 | -5.00044922 |
| C | 1.37598871  | -3.93433896 | -5.00047746 |
| C | 3.58480491  | -2.12642842 | -5.00044922 |
| C | 4.09523184  | -0.77552830 | -5.00047746 |
| C | 3.63394349  | 2.04131790  | -5.00044922 |
| C | 2.71924313  | 3.15881066  | -5.00047746 |
| C | 0.04913858  | 4.16774633  | -5.00044922 |
| C | -1.37598871 | 3.93433896  | -5.00047746 |
| C | -3.58480491 | 2.12642842  | -5.00044922 |
| C | -4.09523184 | 0.77552830  | -5.00047746 |
| C | -2.12365247 | -3.58327733 | -6.25393570 |
| C | -0.77659520 | -4.09229691 | -6.25389097 |
| C | 2.04138296  | -3.63077565 | -6.25393570 |
| C | 3.15573548  | -2.71869963 | -6.25389097 |
| C | 4.16503543  | -0.04749832 | -6.25393570 |
| C | 3.93233068  | 1.37359728  | -6.25389097 |
| C | 2.12365247  | 3.58327733  | -6.25393570 |
| C | 0.77659520  | 4.09229691  | -6.25389097 |
| C | -2.04138296 | 3.63077565  | -6.25393570 |
| C | -3.15573548 | 2.71869963  | -6.25389097 |
| C | -4.16503543 | 0.04749832  | -6.25393570 |
| C | -3.93233068 | -1.37359728 | -6.25389097 |
| C | -0.05027213 | -4.16949894 | -7.50539384 |
| C | 1.37771609  | -3.93568201 | -7.50544286 |
| C | 3.58575593  | -2.12828641 | -7.50539384 |
| C | 4.09725864  | -0.77470387 | -7.50544286 |
| C | 3.63602806  | 2.04121253  | -7.50539384 |
| C | 2.71954255  | 3.16097814  | -7.50544286 |
| C | 0.05027213  | 4.16949894  | -7.50539384 |
| C | -1.37771609 | 3.93568201  | -7.50544286 |
| C | -3.58575593 | 2.12828641  | -7.50539384 |
| C | -4.09725864 | 0.77470387  | -7.50544286 |
| C | -3.63602806 | -2.04121253 | -7.50539384 |
| C | -2.71954255 | -3.16097814 | -7.50544286 |
| C | 2.04134290  | -3.63525206 | -8.75256564 |
| C | 3.16019813  | -2.71944552 | -8.75255314 |
| C | 4.16889208  | -0.04977122 | -8.75256564 |
| C | 3.93520797  | 1.37708910  | -8.75255314 |
| C | 2.12754918  | 3.58548083  | -8.75256564 |
| C | 0.77500984  | 4.09653462  | -8.75255314 |
| C | -2.04134290 | 3.63525206  | -8.75256564 |

|   |             |             |              |
|---|-------------|-------------|--------------|
| C | -3.16019813 | 2.71944552  | -8.75255314  |
| C | -4.16889208 | 0.04977122  | -8.75256564  |
| C | -3.93520797 | -1.37708910 | -8.75255314  |
| C | -2.12754918 | -3.58548083 | -8.75256564  |
| C | -0.77500984 | -4.09653462 | -8.75255314  |
| C | 3.58313251  | -2.12325909 | -10.00487205 |
| C | 4.09197330  | -0.77669179 | -10.00487218 |
| C | 3.63036257  | 2.04145423  | -10.00487205 |
| C | 2.71862147  | 3.15540693  | -10.00487218 |
| C | 0.04723006  | 4.16471332  | -10.00487205 |
| C | -1.37335183 | 3.93209873  | -10.00487218 |
| C | -3.58313251 | 2.12325909  | -10.00487205 |
| C | -4.09197330 | 0.77669179  | -10.00487218 |
| C | -3.63036257 | -2.04145423 | -10.00487205 |
| C | -2.71862147 | -3.15540693 | -10.00487218 |
| C | -0.04723006 | -4.16471332 | -10.00487205 |
| C | 1.37335183  | -3.93209873 | -10.00487218 |
| C | 4.16844097  | -0.04964414 | -11.25769406 |
| C | 3.93484510  | 1.37683060  | -11.25772047 |
| C | 2.12721357  | 3.58515371  | -11.25769406 |
| C | 0.77505228  | 4.09609112  | -11.25772047 |
| C | -2.04122740 | 3.63479785  | -11.25769406 |
| C | -3.15979282 | 2.71926052  | -11.25772047 |
| C | -4.16844097 | 0.04964414  | -11.25769406 |
| C | -3.93484510 | -1.37683060 | -11.25772047 |
| C | -2.12721357 | -3.58515371 | -11.25769406 |
| C | -0.77505228 | -4.09609112 | -11.25772047 |
| C | 2.04122740  | -3.63479785 | -11.25769406 |
| C | 3.15979282  | -2.71926052 | -11.25772047 |
| C | 3.63650879  | 2.04125759  | -12.50488489 |
| C | 2.71956903  | 3.16141742  | -12.50486615 |
| C | 0.05047347  | 4.16993779  | -12.50488489 |
| C | -1.37808328 | 3.93592458  | -12.50486615 |
| C | -3.58603532 | 2.12868020  | -12.50488489 |
| C | -4.09765231 | 0.77450716  | -12.50486615 |
| C | -3.63650879 | -2.04125759 | -12.50488489 |
| C | -2.71956903 | -3.16141742 | -12.50486615 |
| C | -0.05047347 | -4.16993779 | -12.50488489 |
| C | 1.37808328  | -3.93592458 | -12.50486615 |
| C | 3.58603532  | -2.12868020 | -12.50488489 |
| C | 4.09765231  | -0.77450716 | -12.50486615 |
| C | 2.12349599  | 3.58337103  | -13.75606363 |
| C | 0.77662956  | 4.09228400  | -13.75610246 |
| C | -2.04154234 | 3.63068699  | -13.75606363 |
| C | -3.15570713 | 2.71872293  | -13.75610246 |
| C | -4.16503834 | 0.04731596  | -13.75606363 |
| C | -3.93233668 | -1.37356108 | -13.75610246 |
| C | -2.12349599 | -3.58337103 | -13.75606363 |
| C | -0.77662956 | -4.09228400 | -13.75610246 |
| C | 2.04154234  | -3.63068699 | -13.75606363 |
| C | 3.15570713  | -2.71872293 | -13.75610246 |
| C | 4.16503834  | -0.04731596 | -13.75606363 |
| C | 3.93233668  | 1.37356108  | -13.75610246 |
| C | 0.04885361  | 4.16752552  | -15.01031250 |
| C | -1.37578433 | 3.93418681  | -15.01029673 |
| C | -3.58475616 | 2.12607122  | -15.01031250 |
| C | -4.09499788 | 0.77562923  | -15.01029673 |
| C | -3.63360977 | -2.04145429 | -15.01031250 |
| C | -2.71921355 | -3.15855758 | -15.01029673 |
| C | -0.04885361 | -4.16752552 | -15.01031250 |
| C | 1.37578433  | -3.93418681 | -15.01029673 |
| C | 3.58475616  | -2.12607122 | -15.01031250 |
| C | 4.09499788  | -0.77562923 | -15.01029673 |
| C | 3.63360977  | 2.04145429  | -15.01031250 |
| C | 2.71921355  | 3.15855758  | -15.01029673 |
| C | -2.04113282 | 3.63743115  | -16.25788517 |
| C | -3.16229614 | 2.71967071  | -16.25790130 |
| C | -4.17067419 | 0.05104270  | -16.25788517 |
| C | -3.93645200 | -1.37879343 | -16.25790130 |
| C | -2.12954137 | -3.58638845 | -16.25788517 |

|   |             |             |              |
|---|-------------|-------------|--------------|
| C | -0.77415586 | -4.09846415 | -16.25790130 |
| C | 2.04113282  | -3.63743115 | -16.25788517 |
| C | 3.16229614  | -2.71967071 | -16.25790130 |
| C | 4.17067419  | -0.05104270 | -16.25788517 |
| C | 3.93645200  | 1.37879343  | -16.25790130 |
| C | 2.12954137  | 3.58638845  | -16.25788517 |
| C | 0.77415586  | 4.09846415  | -16.25790130 |
| C | -3.58315702 | 2.12389273  | -17.50734282 |
| C | -4.09237277 | 0.77628865  | -17.50736452 |
| C | -3.63092357 | -2.04115864 | -17.50734282 |
| C | -2.71847207 | -3.15595445 | -17.50736452 |
| C | -0.04776655 | -4.16505137 | -17.50734282 |
| C | 1.37390069  | -3.93224310 | -17.50736452 |
| C | 3.58315702  | -2.12389273 | -17.50734282 |
| C | 4.09237277  | -0.77628865 | -17.50736452 |
| C | 3.63092357  | 2.04115864  | -17.50734282 |
| C | 2.71847207  | 3.15595445  | -17.50736452 |
| C | 0.04776655  | 4.16505137  | -17.50734282 |
| C | -1.37390069 | 3.93224310  | -17.50736452 |
| C | -4.16612862 | 0.04798755  | -18.76261791 |
| C | -3.93320436 | -1.37442319 | -18.76259207 |
| C | -2.12462274 | -3.58397945 | -18.76261791 |
| C | -0.77631678 | -4.09346648 | -18.76259207 |
| C | 2.04150588  | -3.63196699 | -18.76261791 |
| C | 3.15688757  | -2.71904330 | -18.76259207 |
| C | 4.16612862  | -0.04798755 | -18.76261791 |
| C | 3.93320436  | 1.37442319  | -18.76259207 |
| C | 2.12462274  | 3.58397945  | -18.76261791 |
| C | 0.77631678  | 4.09346648  | -18.76259207 |
| C | -2.04150588 | 3.63196699  | -18.76261791 |
| C | -3.15688757 | 2.71904330  | -18.76259207 |
| C | -3.63887236 | -2.04149229 | -20.01136986 |
| C | -2.72052092 | -3.16375574 | -20.01137625 |
| C | -0.05145200 | -4.17210205 | -20.01136986 |
| C | 1.37963238  | -3.93791810 | -20.01137625 |
| C | 3.58742036  | -2.13060977 | -20.01136986 |
| C | 4.10015331  | -0.77416236 | -20.01137625 |
| C | 3.63887236  | 2.04149229  | -20.01136986 |
| C | 2.72052092  | 3.16375574  | -20.01137625 |
| C | 0.05145200  | 4.17210205  | -20.01136986 |
| C | -1.37963238 | 3.93791810  | -20.01137625 |
| C | -3.58742036 | 2.13060977  | -20.01136986 |
| C | -4.10015331 | 0.77416236  | -20.01137625 |
| C | -2.12542812 | -3.58431299 | -21.25853217 |
| C | -0.77599428 | -4.09431860 | -21.25854063 |
| C | 2.04139204  | -3.63283124 | -21.25853217 |
| C | 3.15778678  | -2.71919006 | -21.25854063 |
| C | 4.16682016  | -0.04851825 | -21.25853217 |
| C | 3.93378106  | 1.37512854  | -21.25854063 |
| C | 2.12542812  | 3.58431299  | -21.25853217 |
| C | 0.77599428  | 4.09431860  | -21.25854063 |
| C | -2.04139204 | 3.63283124  | -21.25853217 |
| C | -3.15778678 | 2.71919006  | -21.25854063 |
| C | -4.16682016 | 0.04851825  | -21.25853217 |
| C | -3.93378106 | -1.37512854 | -21.25854063 |
| C | -0.04667219 | -4.16446216 | -22.51404004 |
| C | 1.37262262  | -3.93202998 | -22.51405818 |
| C | 3.58319393  | -2.12265039 | -22.51404004 |
| C | 4.09154916  | -0.77728893 | -22.51405818 |
| C | 3.62986612  | 2.04181178  | -22.51404004 |
| C | 2.71892654  | 3.15474105  | -22.51405818 |
| C | 0.04667219  | 4.16446216  | -22.51404004 |
| C | -1.37262262 | 3.93202998  | -22.51405818 |
| C | -3.58319393 | 2.12265039  | -22.51404004 |
| C | -4.09154916 | 0.77728893  | -22.51405818 |
| C | -3.62986612 | -2.04181178 | -22.51404004 |
| C | -2.71892654 | -3.15474105 | -22.51405818 |
| C | 2.04107833  | -3.63844998 | -23.76519535 |
| C | 3.16336447  | -2.71990212 | -23.76515491 |
| C | 4.17152928  | -0.05159931 | -23.76519535 |

|   |             |             |              |
|---|-------------|-------------|--------------|
| C | 3.93718656  | 1.37960293  | -23.76515491 |
| C | 2.13045095  | 3.58685067  | -23.76519535 |
| C | 0.77382210  | 4.09950505  | -23.76515491 |
| C | -2.04107833 | 3.63844998  | -23.76519535 |
| C | -3.16336447 | 2.71990212  | -23.76515491 |
| C | -4.17152928 | 0.05159931  | -23.76519535 |
| C | -3.93718656 | -1.37960293 | -23.76515491 |
| C | -2.13045095 | -3.58685067 | -23.76519535 |
| C | -0.77382210 | -4.09950505 | -23.76515491 |
| C | 3.58033872  | -2.12497267 | -25.00955391 |
| C | 4.09100102  | -0.77376600 | -25.00956092 |
| C | 3.63044967  | 2.03817795  | -25.00955391 |
| C | 2.71560152  | 3.15602781  | -25.00956092 |
| C | 0.05011096  | 4.16315062  | -25.00955391 |
| C | -1.37539950 | 3.92979381  | -25.00956092 |
| C | -3.58033872 | 2.12497267  | -25.00955391 |
| C | -4.09100102 | 0.77376600  | -25.00956092 |
| C | -3.63044967 | -2.03817795 | -25.00955391 |
| C | -2.71560152 | -3.15602781 | -25.00956092 |
| C | -0.05011096 | -4.16315062 | -25.00955391 |
| C | 1.37539950  | -3.92979381 | -25.00956092 |
| C | 4.14714150  | -0.04534812 | -26.26522437 |
| C | 3.91620681  | 1.36529969  | -26.26509882 |
| C | 2.11284337  | 3.56885583  | -26.26522437 |
| C | 0.77571919  | 4.07418443  | -26.26509882 |
| C | -2.03429813 | 3.61420395  | -26.26522437 |
| C | -3.14048762 | 2.70888473  | -26.26509882 |
| C | -4.14714150 | 0.04534812  | -26.26522437 |
| C | -3.91620681 | -1.36529969 | -26.26509882 |
| C | -2.11284337 | -3.56885583 | -26.26522437 |
| C | -0.77571919 | -4.07418443 | -26.26509882 |
| C | 2.03429813  | -3.61420395 | -26.26522437 |
| C | 3.14048762  | -2.70888473 | -26.26509882 |
| C | 3.63133267  | 2.03281714  | -27.52555339 |
| C | 2.71128144  | 3.15719224  | -27.52567263 |
| C | 0.05519505  | 4.16123491  | -27.52555339 |
| C | -1.37856796 | 3.92663472  | -27.52567263 |
| C | -3.57613762 | 2.12841777  | -27.52555339 |
| C | -4.08984940 | 0.76944248  | -27.52567263 |
| C | -3.63133267 | -2.03281714 | -27.52555339 |
| C | -2.71128144 | -3.15719224 | -27.52567263 |
| C | -0.05519505 | -4.16123491 | -27.52555339 |
| C | 1.37856796  | -3.92663472 | -27.52567263 |
| C | 3.57613762  | -2.12841777 | -27.52555339 |
| C | 4.08984940  | -0.76944248 | -27.52567263 |
| C | 2.15287711  | 3.61926826  | -28.76647494 |
| C | 0.78040626  | 4.13817743  | -28.76604482 |
| C | -2.05793970 | 3.67408040  | -28.76647494 |
| C | -3.19356365 | 2.74494036  | -28.76604482 |
| C | -4.21081681 | 0.05481214  | -28.76647494 |
| C | -3.97396991 | -1.39323707 | -28.76604482 |
| C | -2.15287711 | -3.61926826 | -28.76647494 |
| C | -0.78040626 | -4.13817743 | -28.76604482 |
| C | 2.05793970  | -3.67408040 | -28.76647494 |
| C | 3.19356365  | -2.74494036 | -28.76604482 |
| C | 4.21081681  | -0.05481214 | -28.76647494 |
| C | 3.97396991  | 1.39323707  | -28.76604482 |
| C | 0.00197906  | 4.27474139  | -29.98248461 |
| C | -1.36261234 | 4.05143068  | -29.98272800 |
| C | -3.70104511 | 2.13908461  | -29.98248461 |
| C | -4.18994806 | 0.84565844  | -29.98272800 |
| C | -3.70302417 | -2.13565678 | -29.98248461 |
| C | -2.82733573 | -3.20577224 | -29.98272800 |
| C | -0.00197906 | -4.27474139 | -29.98248461 |
| C | 1.36261234  | -4.05143068 | -29.98272800 |
| C | 3.70104511  | -2.13908461 | -29.98248461 |
| C | 4.18994806  | -0.84565844 | -29.98272800 |
| C | 3.70302417  | 2.13565678  | -29.98248461 |
| C | 2.82733573  | 3.20577224  | -29.98272800 |
| H | 0.51982578  | 4.43646177  | 30.93674196  |



|   |             |             |              |
|---|-------------|-------------|--------------|
| H | -1.90321237 | 4.03950445  | 30.93791378  |
| H | -3.58217570 | 2.66841322  | 30.93674196  |
| H | -4.44991966 | 0.37152196  | 30.93791378  |
| H | -4.10200149 | -1.76804855 | 30.93674196  |
| H | -2.54670728 | -3.66798249 | 30.93791378  |
| H | -0.51982578 | -4.43646177 | 30.93674196  |
| H | 1.90321237  | -4.03950445 | 30.93791378  |
| H | 3.58217570  | -2.66841322 | 30.93674196  |
| H | 4.44991966  | -0.37152196 | 30.93791378  |
| H | 4.10200149  | 1.76804855  | 30.93674196  |
| H | 2.54670728  | 3.66798249  | 30.93791378  |
| H | 0.51982578  | 4.43646177  | -30.93674196 |
| H | -1.90321237 | 4.03950445  | -30.93791378 |
| H | -3.58217570 | 2.66841322  | -30.93674196 |
| H | -4.44991966 | 0.37152196  | -30.93791378 |
| H | -4.10200149 | -1.76804855 | -30.93674196 |
| H | -2.54670728 | -3.66798249 | -30.93791378 |
| H | -0.51982578 | -4.43646177 | -30.93674196 |
| H | 1.90321237  | -4.03950445 | -30.93791378 |
| H | 3.58217570  | -2.66841322 | -30.93674196 |
| H | 4.44991966  | -0.37152196 | -30.93791378 |
| H | 4.10200149  | 1.76804855  | -30.93674196 |
| H | 2.54670728  | 3.66798249  | -30.93791378 |

Nanotube (6,6) u25v0s  
B3LYP/STO-3G Energy: -22602.751313

|   |           |           |           |
|---|-----------|-----------|-----------|
| 6 | 0.692561  | 4.213278  | 30.591450 |
| 6 | -0.692561 | 4.213278  | 30.591450 |
| 6 | -3.302526 | 2.706414  | 30.591450 |
| 6 | -3.995086 | 1.506864  | 30.591450 |
| 6 | -3.995086 | -1.506864 | 30.591450 |
| 6 | -3.302526 | -2.706414 | 30.591450 |
| 6 | -0.692561 | -4.213278 | 30.591450 |
| 6 | 0.692561  | -4.213278 | 30.591450 |
| 6 | 3.302526  | -2.706414 | 30.591450 |
| 6 | 3.995086  | -1.506864 | 30.591450 |
| 6 | 3.995086  | 1.506864  | 30.591450 |
| 6 | 3.302526  | 2.706414  | 30.591450 |
| 6 | -1.437284 | 3.961157  | 29.377181 |
| 6 | -2.711820 | 3.225303  | 29.377181 |
| 6 | -4.149104 | 0.735854  | 29.377181 |
| 6 | -4.149104 | -0.735854 | 29.377181 |
| 6 | -2.711820 | -3.225303 | 29.377181 |
| 6 | -1.437284 | -3.961157 | 29.377181 |
| 6 | 1.437284  | -3.961157 | 29.377181 |
| 6 | 2.711820  | -3.225303 | 29.377181 |
| 6 | 4.149104  | -0.735854 | 29.377181 |
| 6 | 4.149104  | 0.735854  | 29.377181 |
| 6 | 2.711820  | 3.225303  | 29.377181 |
| 6 | 1.437284  | 3.961157  | 29.377181 |
| 6 | -3.186094 | 2.677522  | 28.137115 |
| 6 | -3.911850 | 1.420478  | 28.137115 |
| 6 | -3.911850 | -1.420478 | 28.137115 |
| 6 | -3.186094 | -2.677522 | 28.137115 |
| 6 | -0.725755 | -4.098000 | 28.137115 |
| 6 | 0.725755  | -4.098000 | 28.137115 |
| 6 | 3.186094  | -2.677522 | 28.137115 |
| 6 | 3.911850  | -1.420478 | 28.137115 |
| 6 | 3.911850  | 1.420478  | 28.137115 |
| 6 | 3.186094  | 2.677522  | 28.137115 |
| 6 | 0.725755  | 4.098000  | 28.137115 |
| 6 | -0.725755 | 4.098000  | 28.137115 |
| 6 | -4.088000 | 0.715646  | 26.875110 |
| 6 | -4.088000 | -0.715646 | 26.875110 |
| 6 | -2.663767 | -3.182489 | 26.875110 |
| 6 | -1.424233 | -3.898135 | 26.875110 |
| 6 | 1.424233  | -3.898135 | 26.875110 |

|   |           |           |           |
|---|-----------|-----------|-----------|
| 6 | 2.663767  | -3.182489 | 26.875110 |
| 6 | 4.088000  | -0.715646 | 26.875110 |
| 6 | 4.088000  | 0.715646  | 26.875110 |
| 6 | 2.663767  | 3.182489  | 26.875110 |
| 6 | 1.424233  | 3.898135  | 26.875110 |
| 6 | -1.424233 | 3.898135  | 26.875110 |
| 6 | -2.663767 | 3.182489  | 26.875110 |
| 6 | -3.917351 | -1.424616 | 25.622831 |
| 6 | -3.192430 | -2.680217 | 25.622831 |
| 6 | -0.724922 | -4.104834 | 25.622831 |
| 6 | 0.724922  | -4.104834 | 25.622831 |
| 6 | 3.192430  | -2.680217 | 25.622831 |
| 6 | 3.917351  | -1.424616 | 25.622831 |
| 6 | 3.917351  | 1.424616  | 25.622831 |
| 6 | 3.192430  | 2.680217  | 25.622831 |
| 6 | 0.724922  | 4.104834  | 25.622831 |
| 6 | -0.724922 | 4.104834  | 25.622831 |
| 6 | -3.192430 | 2.680217  | 25.622831 |
| 6 | -3.917351 | 1.424616  | 25.622831 |
| 6 | -2.681737 | -3.195695 | 24.379728 |
| 6 | -1.426685 | -3.920300 | 24.379728 |
| 6 | 1.426685  | -3.920300 | 24.379728 |
| 6 | 2.681737  | -3.195695 | 24.379728 |
| 6 | 4.108422  | -0.724605 | 24.379728 |
| 6 | 4.108422  | 0.724605  | 24.379728 |
| 6 | 2.681737  | 3.195695  | 24.379728 |
| 6 | 1.426685  | 3.920300  | 24.379728 |
| 6 | -1.426685 | 3.920300  | 24.379728 |
| 6 | -2.681737 | 3.195695  | 24.379728 |
| 6 | -4.108422 | 0.724605  | 24.379728 |
| 6 | -4.108422 | -0.724605 | 24.379728 |
| 6 | -0.719456 | -4.103648 | 23.125973 |
| 6 | 0.719456  | -4.103648 | 23.125973 |
| 6 | 3.194135  | -2.674891 | 23.125973 |
| 6 | 3.913591  | -1.428757 | 23.125973 |
| 6 | 3.913591  | 1.428757  | 23.125973 |
| 6 | 3.194135  | 2.674891  | 23.125973 |
| 6 | 0.719456  | 4.103648  | 23.125973 |
| 6 | -0.719456 | 4.103648  | 23.125973 |
| 6 | -3.194135 | 2.674891  | 23.125973 |
| 6 | -3.913591 | 1.428757  | 23.125973 |
| 6 | -3.913591 | -1.428757 | 23.125973 |
| 6 | -3.194135 | -2.674891 | 23.125973 |
| 6 | 1.427238  | -3.920871 | 21.873240 |
| 6 | 2.681955  | -3.196460 | 21.873240 |
| 6 | 4.109193  | -0.724411 | 21.873240 |
| 6 | 4.109193  | 0.724411  | 21.873240 |
| 6 | 2.681955  | 3.196460  | 21.873240 |
| 6 | 1.427238  | 3.920871  | 21.873240 |
| 6 | -1.427238 | 3.920871  | 21.873240 |
| 6 | -2.681955 | 3.196460  | 21.873240 |
| 6 | -4.109193 | 0.724411  | 21.873240 |
| 6 | -4.109193 | -0.724411 | 21.873240 |
| 6 | -2.681955 | -3.196460 | 21.873240 |
| 6 | -1.427238 | -3.920871 | 21.873240 |
| 6 | 3.196524  | -2.682465 | 20.628341 |
| 6 | 3.921344  | -1.427039 | 20.628341 |
| 6 | 3.921344  | 1.427039  | 20.628341 |
| 6 | 3.196524  | 2.682465  | 20.628341 |
| 6 | 0.724821  | 4.109503  | 20.628341 |
| 6 | -0.724821 | 4.109503  | 20.628341 |
| 6 | -3.196524 | 2.682465  | 20.628341 |
| 6 | -3.921344 | 1.427039  | 20.628341 |
| 6 | -3.921344 | -1.427039 | 20.628341 |
| 6 | -3.196524 | -2.682465 | 20.628341 |
| 6 | -0.724821 | -4.109503 | 20.628341 |
| 6 | 0.724821  | -4.109503 | 20.628341 |
| 6 | 4.103890  | -0.720250 | 19.376405 |
| 6 | 4.103890  | 0.720250  | 19.376405 |
| 6 | 2.675700  | 3.193948  | 19.376405 |

|   |           |           |           |
|---|-----------|-----------|-----------|
| 6 | 1.428190  | 3.914198  | 19.376405 |
| 6 | -1.428190 | 3.914198  | 19.376405 |
| 6 | -2.675700 | 3.193948  | 19.376405 |
| 6 | -4.103890 | 0.720250  | 19.376405 |
| 6 | -4.103890 | -0.720250 | 19.376405 |
| 6 | -2.675700 | -3.193948 | 19.376405 |
| 6 | -1.428190 | -3.914198 | 19.376405 |
| 6 | 1.428190  | -3.914198 | 19.376405 |
| 6 | 2.675700  | -3.193948 | 19.376405 |
| 6 | 3.919279  | 1.427216  | 18.123287 |
| 6 | 3.195645  | 2.680587  | 18.123287 |
| 6 | 0.723634  | 4.107803  | 18.123287 |
| 6 | -0.723634 | 4.107803  | 18.123287 |
| 6 | -3.195645 | 2.680587  | 18.123287 |
| 6 | -3.919279 | 1.427216  | 18.123287 |
| 6 | -3.919279 | -1.427216 | 18.123287 |
| 6 | -3.195645 | -2.680587 | 18.123287 |
| 6 | -0.723634 | -4.107803 | 18.123287 |
| 6 | 0.723634  | -4.107803 | 18.123287 |
| 6 | 3.195645  | -2.680587 | 18.123287 |
| 6 | 3.919279  | -1.427216 | 18.123287 |
| 6 | 2.682392  | 3.196390  | 16.877435 |
| 6 | 1.426959  | 3.921215  | 16.877435 |
| 6 | -1.426959 | 3.921215  | 16.877435 |
| 6 | -2.682392 | 3.196390  | 16.877435 |
| 6 | -4.109351 | 0.724825  | 16.877435 |
| 6 | -4.109351 | -0.724825 | 16.877435 |
| 6 | -2.682392 | -3.196390 | 16.877435 |
| 6 | -1.426959 | -3.921215 | 16.877435 |
| 6 | 1.426959  | -3.921215 | 16.877435 |
| 6 | 2.682392  | -3.196390 | 16.877435 |
| 6 | 4.109351  | -0.724825 | 16.877435 |
| 6 | 4.109351  | 0.724825  | 16.877435 |
| 6 | 0.720723  | 4.104447  | 15.626546 |
| 6 | -0.720723 | 4.104447  | 15.626546 |
| 6 | -3.194194 | 2.676388  | 15.626546 |
| 6 | -3.914917 | 1.428059  | 15.626546 |
| 6 | -3.914917 | -1.428059 | 15.626546 |
| 6 | -3.194194 | -2.676388 | 15.626546 |
| 6 | -0.720723 | -4.104447 | 15.626546 |
| 6 | 0.720723  | -4.104447 | 15.626546 |
| 6 | 3.194194  | -2.676388 | 15.626546 |
| 6 | 3.914917  | -1.428059 | 15.626546 |
| 6 | 3.914917  | 1.428059  | 15.626546 |
| 6 | 3.194194  | 2.676388  | 15.626546 |
| 6 | -1.427373 | 3.918648  | 14.373279 |
| 6 | -2.679962 | 3.195465  | 14.373279 |
| 6 | -4.107335 | 0.723182  | 14.373279 |
| 6 | -4.107335 | -0.723182 | 14.373279 |
| 6 | -2.679962 | -3.195465 | 14.373279 |
| 6 | -1.427373 | -3.918648 | 14.373279 |
| 6 | 1.427373  | -3.918648 | 14.373279 |
| 6 | 2.679962  | -3.195465 | 14.373279 |
| 6 | 4.107335  | -0.723182 | 14.373279 |
| 6 | 4.107335  | 0.723182  | 14.373279 |
| 6 | 2.679962  | 3.195465  | 14.373279 |
| 6 | 1.427373  | 3.918648  | 14.373279 |
| 6 | -3.196437 | 2.682478  | 13.126783 |
| 6 | -3.921313 | 1.426957  | 13.126783 |
| 6 | -3.921313 | -1.426957 | 13.126783 |
| 6 | -3.196437 | -2.682478 | 13.126783 |
| 6 | -0.724876 | -4.109435 | 13.126783 |
| 6 | 0.724876  | -4.109435 | 13.126783 |
| 6 | 3.196437  | -2.682478 | 13.126783 |
| 6 | 3.921313  | -1.426957 | 13.126783 |
| 6 | 3.921313  | 1.426957  | 13.126783 |
| 6 | 3.196437  | 2.682478  | 13.126783 |
| 6 | 0.724876  | 4.109435  | 13.126783 |
| 6 | -0.724876 | 4.109435  | 13.126783 |
| 6 | -4.104859 | 0.721066  | 11.876629 |

|   |           |           |           |
|---|-----------|-----------|-----------|
| 6 | -4.104859 | -0.721066 | 11.876629 |
| 6 | -2.676891 | -3.194379 | 11.876629 |
| 6 | -1.427968 | -3.915445 | 11.876629 |
| 6 | 1.427968  | -3.915445 | 11.876629 |
| 6 | 2.676891  | -3.194379 | 11.876629 |
| 6 | 4.104859  | -0.721066 | 11.876629 |
| 6 | 4.104859  | 0.721066  | 11.876629 |
| 6 | 2.676891  | 3.194379  | 11.876629 |
| 6 | 1.427968  | 3.915445  | 11.876629 |
| 6 | -1.427968 | 3.915445  | 11.876629 |
| 6 | -2.676891 | 3.194379  | 11.876629 |
| 6 | -3.918101 | -1.427482 | 10.623260 |
| 6 | -3.195286 | -2.679434 | 10.623260 |
| 6 | -0.722815 | -4.106916 | 10.623260 |
| 6 | 0.722815  | -4.106916 | 10.623260 |
| 6 | 3.195286  | -2.679434 | 10.623260 |
| 6 | 3.918101  | -1.427482 | 10.623260 |
| 6 | 3.918101  | 1.427482  | 10.623260 |
| 6 | 3.195286  | 2.679434  | 10.623260 |
| 6 | 0.722815  | 4.106916  | 10.623260 |
| 6 | -0.722815 | 4.106916  | 10.623260 |
| 6 | -3.195286 | 2.679434  | 10.623260 |
| 6 | -3.918101 | 1.427482  | 10.623260 |
| 6 | -2.682534 | -3.196453 | 9.376229  |
| 6 | -1.426942 | -3.921369 | 9.376229  |
| 6 | 1.426942  | -3.921369 | 9.376229  |
| 6 | 2.682534  | -3.196453 | 9.376229  |
| 6 | 4.109476  | -0.724917 | 9.376229  |
| 6 | 4.109476  | 0.724917  | 9.376229  |
| 6 | 2.682534  | 3.196453  | 9.376229  |
| 6 | 1.426942  | 3.921369  | 9.376229  |
| 6 | -1.426942 | 3.921369  | 9.376229  |
| 6 | -2.682534 | 3.196453  | 9.376229  |
| 6 | -4.109476 | 0.724917  | 9.376229  |
| 6 | -4.109476 | -0.724917 | 9.376229  |
| 6 | -0.721362 | -4.105201 | 8.126685  |
| 6 | 0.721362  | -4.105201 | 8.126685  |
| 6 | 3.194528  | -2.677319 | 8.126685  |
| 6 | 3.915890  | -1.427883 | 8.126685  |
| 6 | 3.915890  | 1.427883  | 8.126685  |
| 6 | 3.194528  | 2.677319  | 8.126685  |
| 6 | 0.721362  | 4.105201  | 8.126685  |
| 6 | -0.721362 | 4.105201  | 8.126685  |
| 6 | -3.194528 | 2.677319  | 8.126685  |
| 6 | -3.915890 | 1.427883  | 8.126685  |
| 6 | -3.915890 | -1.427883 | 8.126685  |
| 6 | -3.194528 | -2.677319 | 8.126685  |
| 6 | 1.427572  | -3.917620 | 6.873244  |
| 6 | 2.678972  | -3.195124 | 6.873244  |
| 6 | 4.106544  | -0.722496 | 6.873244  |
| 6 | 4.106544  | 0.722496  | 6.873244  |
| 6 | 2.678972  | 3.195124  | 6.873244  |
| 6 | 1.427572  | 3.917620  | 6.873244  |
| 6 | -1.427572 | 3.917620  | 6.873244  |
| 6 | -2.678972 | 3.195124  | 6.873244  |
| 6 | -4.106544 | 0.722496  | 6.873244  |
| 6 | -4.106544 | -0.722496 | 6.873244  |
| 6 | -2.678972 | -3.195124 | 6.873244  |
| 6 | -1.427572 | -3.917620 | 6.873244  |
| 6 | 3.196464  | -2.682575 | 5.625722  |
| 6 | 3.921410  | -1.426932 | 5.625722  |
| 6 | 3.921410  | 1.426932  | 5.625722  |
| 6 | 3.196464  | 2.682575  | 5.625722  |
| 6 | 0.724946  | 4.109507  | 5.625722  |
| 6 | -0.724946 | 4.109507  | 5.625722  |
| 6 | -3.196464 | 2.682575  | 5.625722  |
| 6 | -3.921410 | 1.426932  | 5.625722  |
| 6 | -3.921410 | -1.426932 | 5.625722  |
| 6 | -3.196464 | -2.682575 | 5.625722  |
| 6 | -0.724946 | -4.109507 | 5.625722  |

|   |           |           |           |
|---|-----------|-----------|-----------|
| 6 | 0.724946  | -4.109507 | 5.625722  |
| 6 | 4.105526  | -0.721637 | 4.376718  |
| 6 | 4.105526  | 0.721637  | 4.376718  |
| 6 | 2.677719  | 3.194671  | 4.376718  |
| 6 | 1.427807  | 3.916308  | 4.376718  |
| 6 | -1.427807 | 3.916308  | 4.376718  |
| 6 | -2.677719 | 3.194671  | 4.376718  |
| 6 | -4.105526 | 0.721637  | 4.376718  |
| 6 | -4.105526 | -0.721637 | 4.376718  |
| 6 | -2.677719 | -3.194671 | 4.376718  |
| 6 | -1.427807 | -3.916308 | 4.376718  |
| 6 | 1.427807  | -3.916308 | 4.376718  |
| 6 | 2.677719  | -3.194671 | 4.376718  |
| 6 | 3.917176  | 1.427662  | 3.123237  |
| 6 | 3.194980  | 2.678543  | 3.123237  |
| 6 | 0.722197  | 4.106205  | 3.123237  |
| 6 | -0.722197 | 4.106205  | 3.123237  |
| 6 | -3.194980 | 2.678543  | 3.123237  |
| 6 | -3.917176 | 1.427662  | 3.123237  |
| 6 | -3.917176 | -1.427662 | 3.123237  |
| 6 | -3.194980 | -2.678543 | 3.123237  |
| 6 | -0.722197 | -4.106205 | 3.123237  |
| 6 | 0.722197  | -4.106205 | 3.123237  |
| 6 | 3.194980  | -2.678543 | 3.123237  |
| 6 | 3.917176  | -1.427662 | 3.123237  |
| 6 | 2.682601  | 3.196478  | 1.875236  |
| 6 | 1.426930  | 3.921440  | 1.875236  |
| 6 | -1.426930 | 3.921440  | 1.875236  |
| 6 | -2.682601 | 3.196478  | 1.875236  |
| 6 | -4.109532 | 0.724962  | 1.875236  |
| 6 | -4.109532 | -0.724962 | 1.875236  |
| 6 | -2.682601 | -3.196478 | 1.875236  |
| 6 | -1.426930 | -3.921440 | 1.875236  |
| 6 | 1.426930  | -3.921440 | 1.875236  |
| 6 | 2.682601  | -3.196478 | 1.875236  |
| 6 | 4.109532  | -0.724962 | 1.875236  |
| 6 | 4.109532  | 0.724962  | 1.875236  |
| 6 | 0.721916  | 4.105858  | 0.626747  |
| 6 | -0.721916 | 4.105858  | 0.626747  |
| 6 | -3.194819 | 2.678127  | 0.626747  |
| 6 | -3.916735 | 1.427731  | 0.626747  |
| 6 | -3.916735 | -1.427731 | 0.626747  |
| 6 | -3.194819 | -2.678127 | 0.626747  |
| 6 | -0.721916 | -4.105858 | 0.626747  |
| 6 | 0.721916  | -4.105858 | 0.626747  |
| 6 | 3.194819  | -2.678127 | 0.626747  |
| 6 | 3.916735  | -1.427731 | 0.626747  |
| 6 | 3.916735  | 1.427731  | 0.626747  |
| 6 | 3.194819  | 2.678127  | 0.626747  |
| 6 | -1.427731 | 3.916735  | -0.626747 |
| 6 | -2.678127 | 3.194819  | -0.626747 |
| 6 | -4.105858 | 0.721916  | -0.626747 |
| 6 | -4.105858 | -0.721916 | -0.626747 |
| 6 | -2.678127 | -3.194819 | -0.626747 |
| 6 | -1.427731 | -3.916735 | -0.626747 |
| 6 | 1.427731  | -3.916735 | -0.626747 |
| 6 | 2.678127  | -3.194819 | -0.626747 |
| 6 | 4.105858  | -0.721916 | -0.626747 |
| 6 | 4.105858  | 0.721916  | -0.626747 |
| 6 | 2.678127  | 3.194819  | -0.626747 |
| 6 | 1.427731  | 3.916735  | -0.626747 |
| 6 | -3.196478 | 2.682601  | -1.875236 |
| 6 | -3.921440 | 1.426930  | -1.875236 |
| 6 | -3.921440 | -1.426930 | -1.875236 |
| 6 | -3.196478 | -2.682601 | -1.875236 |
| 6 | -0.724962 | -4.109532 | -1.875236 |
| 6 | 0.724962  | -4.109532 | -1.875236 |
| 6 | 3.196478  | -2.682601 | -1.875236 |
| 6 | 3.921440  | -1.426930 | -1.875236 |
| 6 | 3.921440  | 1.426930  | -1.875236 |

|   |           |           |           |
|---|-----------|-----------|-----------|
| 6 | 3.196478  | 2.682601  | -1.875236 |
| 6 | 0.724962  | 4.109532  | -1.875236 |
| 6 | -0.724962 | 4.109532  | -1.875236 |
| 6 | -4.106205 | 0.722197  | -3.123237 |
| 6 | -4.106205 | -0.722197 | -3.123237 |
| 6 | -2.678543 | -3.194980 | -3.123237 |
| 6 | -1.427662 | -3.917176 | -3.123237 |
| 6 | 1.427662  | -3.917176 | -3.123237 |
| 6 | 2.678543  | -3.194980 | -3.123237 |
| 6 | 4.106205  | -0.722197 | -3.123237 |
| 6 | 4.106205  | 0.722197  | -3.123237 |
| 6 | 2.678543  | 3.194980  | -3.123237 |
| 6 | 1.427662  | 3.917176  | -3.123237 |
| 6 | -1.427662 | 3.917176  | -3.123237 |
| 6 | -2.678543 | 3.194980  | -3.123237 |
| 6 | -3.916308 | -1.427807 | -4.376718 |
| 6 | -3.194671 | -2.677719 | -4.376718 |
| 6 | -0.721637 | -4.105526 | -4.376718 |
| 6 | 0.721637  | -4.105526 | -4.376718 |
| 6 | 3.194671  | -2.677719 | -4.376718 |
| 6 | 3.916308  | -1.427807 | -4.376718 |
| 6 | 3.916308  | 1.427807  | -4.376718 |
| 6 | 3.194671  | 2.677719  | -4.376718 |
| 6 | 0.721637  | 4.105526  | -4.376718 |
| 6 | -0.721637 | 4.105526  | -4.376718 |
| 6 | -3.194671 | 2.677719  | -4.376718 |
| 6 | -3.916308 | 1.427807  | -4.376718 |
| 6 | -2.682575 | -3.196464 | -5.625722 |
| 6 | -1.426932 | -3.921410 | -5.625722 |
| 6 | 1.426932  | -3.921410 | -5.625722 |
| 6 | 2.682575  | -3.196464 | -5.625722 |
| 6 | 4.109507  | -0.724946 | -5.625722 |
| 6 | 4.109507  | 0.724946  | -5.625722 |
| 6 | 2.682575  | 3.196464  | -5.625722 |
| 6 | 1.426932  | 3.921410  | -5.625722 |
| 6 | -1.426932 | 3.921410  | -5.625722 |
| 6 | -2.682575 | 3.196464  | -5.625722 |
| 6 | -4.109507 | 0.724946  | -5.625722 |
| 6 | -4.109507 | -0.724946 | -5.625722 |
| 6 | -0.722496 | -4.106544 | -6.873244 |
| 6 | 0.722496  | -4.106544 | -6.873244 |
| 6 | 3.195124  | -2.678972 | -6.873244 |
| 6 | 3.917620  | -1.427572 | -6.873244 |
| 6 | 3.917620  | 1.427572  | -6.873244 |
| 6 | 3.195124  | 2.678972  | -6.873244 |
| 6 | 0.722496  | 4.106544  | -6.873244 |
| 6 | -0.722496 | 4.106544  | -6.873244 |
| 6 | -3.195124 | 2.678972  | -6.873244 |
| 6 | -3.917620 | 1.427572  | -6.873244 |
| 6 | -3.917620 | -1.427572 | -6.873244 |
| 6 | -3.195124 | -2.678972 | -6.873244 |
| 6 | 1.427883  | -3.915890 | -8.126685 |
| 6 | 2.677319  | -3.194528 | -8.126685 |
| 6 | 4.105201  | -0.721362 | -8.126685 |
| 6 | 4.105201  | 0.721362  | -8.126685 |
| 6 | 2.677319  | 3.194528  | -8.126685 |
| 6 | 1.427883  | 3.915890  | -8.126685 |
| 6 | -1.427883 | 3.915890  | -8.126685 |
| 6 | -2.677319 | 3.194528  | -8.126685 |
| 6 | -4.105201 | 0.721362  | -8.126685 |
| 6 | -4.105201 | -0.721362 | -8.126685 |
| 6 | -2.677319 | -3.194528 | -8.126685 |
| 6 | -1.427883 | -3.915890 | -8.126685 |
| 6 | 3.196453  | -2.682534 | -9.376229 |
| 6 | 3.921369  | -1.426942 | -9.376229 |
| 6 | 3.921369  | 1.426942  | -9.376229 |
| 6 | 3.196453  | 2.682534  | -9.376229 |
| 6 | 0.724917  | 4.109476  | -9.376229 |
| 6 | -0.724917 | 4.109476  | -9.376229 |
| 6 | -3.196453 | 2.682534  | -9.376229 |

|   |           |           |            |
|---|-----------|-----------|------------|
| 6 | -3.921369 | 1.426942  | -9.376229  |
| 6 | -3.921369 | -1.426942 | -9.376229  |
| 6 | -3.196453 | -2.682534 | -9.376229  |
| 6 | -0.724917 | -4.109476 | -9.376229  |
| 6 | 0.724917  | -4.109476 | -9.376229  |
| 6 | 4.106916  | -0.722815 | -10.623260 |
| 6 | 4.106916  | 0.722815  | -10.623260 |
| 6 | 2.679434  | 3.195286  | -10.623260 |
| 6 | 1.427482  | 3.918101  | -10.623260 |
| 6 | -1.427482 | 3.918101  | -10.623260 |
| 6 | -2.679434 | 3.195286  | -10.623260 |
| 6 | -4.106916 | 0.722815  | -10.623260 |
| 6 | -4.106916 | -0.722815 | -10.623260 |
| 6 | -2.679434 | -3.195286 | -10.623260 |
| 6 | -1.427482 | -3.918101 | -10.623260 |
| 6 | 1.427482  | -3.918101 | -10.623260 |
| 6 | 2.679434  | -3.195286 | -10.623260 |
| 6 | 3.915445  | 1.427968  | -11.876629 |
| 6 | 3.194379  | 2.676891  | -11.876629 |
| 6 | 0.721066  | 4.104859  | -11.876629 |
| 6 | -0.721066 | 4.104859  | -11.876629 |
| 6 | -3.194379 | 2.676891  | -11.876629 |
| 6 | -3.915445 | 1.427968  | -11.876629 |
| 6 | -3.194379 | -2.676891 | -11.876629 |
| 6 | -0.721066 | -4.104859 | -11.876629 |
| 6 | 0.721066  | -4.104859 | -11.876629 |
| 6 | 3.194379  | -2.676891 | -11.876629 |
| 6 | 3.915445  | -1.427968 | -11.876629 |
| 6 | 2.682478  | 3.196437  | -13.126783 |
| 6 | 1.426957  | 3.921313  | -13.126783 |
| 6 | -1.426957 | 3.921313  | -13.126783 |
| 6 | -2.682478 | 3.196437  | -13.126783 |
| 6 | -4.109435 | 0.724876  | -13.126783 |
| 6 | -4.109435 | -0.724876 | -13.126783 |
| 6 | -2.682478 | -3.196437 | -13.126783 |
| 6 | -1.426957 | -3.921313 | -13.126783 |
| 6 | 1.426957  | -3.921313 | -13.126783 |
| 6 | 2.682478  | -3.196437 | -13.126783 |
| 6 | 4.109435  | -0.724876 | -13.126783 |
| 6 | 4.109435  | 0.724876  | -13.126783 |
| 6 | 0.723182  | 4.107335  | -14.373279 |
| 6 | -0.723182 | 4.107335  | -14.373279 |
| 6 | -3.195465 | 2.679962  | -14.373279 |
| 6 | -3.918648 | 1.427373  | -14.373279 |
| 6 | -3.918648 | -1.427373 | -14.373279 |
| 6 | -3.195465 | -2.679962 | -14.373279 |
| 6 | -0.723182 | -4.107335 | -14.373279 |
| 6 | 0.723182  | -4.107335 | -14.373279 |
| 6 | 3.195465  | -2.679962 | -14.373279 |
| 6 | 3.918648  | -1.427373 | -14.373279 |
| 6 | 3.918648  | 1.427373  | -14.373279 |
| 6 | 3.195465  | 2.679962  | -14.373279 |
| 6 | -1.428059 | 3.914917  | -15.626546 |
| 6 | -2.676388 | 3.194194  | -15.626546 |
| 6 | -4.104447 | 0.720723  | -15.626546 |
| 6 | -4.104447 | -0.720723 | -15.626546 |
| 6 | -2.676388 | -3.194194 | -15.626546 |
| 6 | -1.428059 | -3.914917 | -15.626546 |
| 6 | 1.428059  | -3.914917 | -15.626546 |
| 6 | 2.676388  | -3.194194 | -15.626546 |
| 6 | 4.104447  | -0.720723 | -15.626546 |
| 6 | 4.104447  | 0.720723  | -15.626546 |
| 6 | 2.676388  | 3.194194  | -15.626546 |
| 6 | 1.428059  | 3.914917  | -15.626546 |
| 6 | -3.196390 | 2.682392  | -16.877435 |
| 6 | -3.921215 | 1.426959  | -16.877435 |
| 6 | -3.921215 | -1.426959 | -16.877435 |
| 6 | -3.196390 | -2.682392 | -16.877435 |
| 6 | -0.724825 | -4.109351 | -16.877435 |

|   |           |           |            |
|---|-----------|-----------|------------|
| 6 | 0.724825  | -4.109351 | -16.877435 |
| 6 | 3.196390  | -2.682392 | -16.877435 |
| 6 | 3.921215  | -1.426959 | -16.877435 |
| 6 | 3.921215  | 1.426959  | -16.877435 |
| 6 | 3.196390  | 2.682392  | -16.877435 |
| 6 | 0.724825  | 4.109351  | -16.877435 |
| 6 | -0.724825 | 4.109351  | -16.877435 |
| 6 | -4.107803 | 0.723634  | -18.123287 |
| 6 | -4.107803 | -0.723634 | -18.123287 |
| 6 | -2.680587 | -3.195645 | -18.123287 |
| 6 | -1.427216 | -3.919279 | -18.123287 |
| 6 | 1.427216  | -3.919279 | -18.123287 |
| 6 | 2.680587  | -3.195645 | -18.123287 |
| 6 | 4.107803  | -0.723634 | -18.123287 |
| 6 | 4.107803  | 0.723634  | -18.123287 |
| 6 | 2.680587  | 3.195645  | -18.123287 |
| 6 | 1.427216  | 3.919279  | -18.123287 |
| 6 | -1.427216 | 3.919279  | -18.123287 |
| 6 | -2.680587 | 3.195645  | -18.123287 |
| 6 | -3.914198 | -1.428190 | -19.376405 |
| 6 | -3.193948 | -2.675700 | -19.376405 |
| 6 | -0.720250 | -4.103890 | -19.376405 |
| 6 | 0.720250  | -4.103890 | -19.376405 |
| 6 | 3.193948  | -2.675700 | -19.376405 |
| 6 | 3.914198  | -1.428190 | -19.376405 |
| 6 | 3.914198  | 1.428190  | -19.376405 |
| 6 | 3.193948  | 2.675700  | -19.376405 |
| 6 | 0.720250  | 4.103890  | -19.376405 |
| 6 | -0.720250 | 4.103890  | -19.376405 |
| 6 | -3.193948 | 2.675700  | -19.376405 |
| 6 | -3.914198 | 1.428190  | -19.376405 |
| 6 | -2.682465 | -3.196524 | -20.628341 |
| 6 | -1.427039 | -3.921344 | -20.628341 |
| 6 | 1.427039  | -3.921344 | -20.628341 |
| 6 | 2.682465  | -3.196524 | -20.628341 |
| 6 | 4.109503  | -0.724821 | -20.628341 |
| 6 | 4.109503  | 0.724821  | -20.628341 |
| 6 | 2.682465  | 3.196524  | -20.628341 |
| 6 | 1.427039  | 3.921344  | -20.628341 |
| 6 | -1.427039 | 3.921344  | -20.628341 |
| 6 | -2.682465 | 3.196524  | -20.628341 |
| 6 | -4.109503 | 0.724821  | -20.628341 |
| 6 | -4.109503 | -0.724821 | -20.628341 |
| 6 | -0.724411 | -4.109193 | -21.873240 |
| 6 | 0.724411  | -4.109193 | -21.873240 |
| 6 | 3.196460  | -2.681955 | -21.873240 |
| 6 | 3.920871  | -1.427238 | -21.873240 |
| 6 | 3.920871  | 1.427238  | -21.873240 |
| 6 | 3.196460  | 2.681955  | -21.873240 |
| 6 | 0.724411  | 4.109193  | -21.873240 |
| 6 | -0.724411 | 4.109193  | -21.873240 |
| 6 | -3.196460 | 2.681955  | -21.873240 |
| 6 | -3.920871 | 1.427238  | -21.873240 |
| 6 | -3.920871 | -1.427238 | -21.873240 |
| 6 | -3.196460 | -2.681955 | -21.873240 |
| 6 | 1.428757  | -3.913591 | -23.125973 |
| 6 | 2.674891  | -3.194135 | -23.125973 |
| 6 | 4.103648  | -0.719456 | -23.125973 |
| 6 | 4.103648  | 0.719456  | -23.125973 |
| 6 | 2.674891  | 3.194135  | -23.125973 |
| 6 | 1.428757  | 3.913591  | -23.125973 |
| 6 | -1.428757 | 3.913591  | -23.125973 |
| 6 | -2.674891 | 3.194135  | -23.125973 |
| 6 | -4.103648 | 0.719456  | -23.125973 |
| 6 | -4.103648 | -0.719456 | -23.125973 |
| 6 | -2.674891 | -3.194135 | -23.125973 |
| 6 | -1.428757 | -3.913591 | -23.125973 |
| 6 | 3.195695  | -2.681737 | -24.379728 |
| 6 | 3.920300  | -1.426685 | -24.379728 |
| 6 | 3.920300  | 1.426685  | -24.379728 |



|   |           |           |            |
|---|-----------|-----------|------------|
| 6 | 3.195695  | 2.681737  | -24.379728 |
| 6 | 0.724605  | 4.108422  | -24.379728 |
| 6 | -0.724605 | 4.108422  | -24.379728 |
| 6 | -3.195695 | 2.681737  | -24.379728 |
| 6 | -3.920300 | 1.426685  | -24.379728 |
| 6 | -3.920300 | -1.426685 | -24.379728 |
| 6 | -3.195695 | -2.681737 | -24.379728 |
| 6 | -0.724605 | -4.108422 | -24.379728 |
| 6 | 0.724605  | -4.108422 | -24.379728 |
| 6 | 4.104834  | -0.724922 | -25.622831 |
| 6 | 4.104834  | 0.724922  | -25.622831 |
| 6 | 2.680217  | 3.192430  | -25.622831 |
| 6 | 1.424616  | 3.917351  | -25.622831 |
| 6 | -1.424616 | 3.917351  | -25.622831 |
| 6 | -2.680217 | 3.192430  | -25.622831 |
| 6 | -4.104834 | 0.724922  | -25.622831 |
| 6 | -4.104834 | -0.724922 | -25.622831 |
| 6 | -2.680217 | -3.192430 | -25.622831 |
| 6 | -1.424616 | -3.917351 | -25.622831 |
| 6 | 1.424616  | -3.917351 | -25.622831 |
| 6 | 2.680217  | -3.192430 | -25.622831 |
| 6 | 3.898135  | 1.424233  | -26.875110 |
| 6 | 3.182489  | 2.663767  | -26.875110 |
| 6 | 0.715646  | 4.088000  | -26.875110 |
| 6 | -0.715646 | 4.088000  | -26.875110 |
| 6 | -3.182489 | 2.663767  | -26.875110 |
| 6 | -3.898135 | 1.424233  | -26.875110 |
| 6 | -3.898135 | -1.424233 | -26.875110 |
| 6 | -3.182489 | -2.663767 | -26.875110 |
| 6 | -0.715646 | -4.088000 | -26.875110 |
| 6 | 0.715646  | -4.088000 | -26.875110 |
| 6 | 3.182489  | -2.663767 | -26.875110 |
| 6 | 3.898135  | -1.424233 | -26.875110 |
| 6 | 2.677522  | 3.186094  | -28.137115 |
| 6 | 1.420478  | 3.911850  | -28.137115 |
| 6 | -1.420478 | 3.911850  | -28.137115 |
| 6 | -2.677522 | 3.186094  | -28.137115 |
| 6 | -4.098000 | 0.725755  | -28.137115 |
| 6 | -4.098000 | -0.725755 | -28.137115 |
| 6 | -2.677522 | -3.186094 | -28.137115 |
| 6 | -1.420478 | -3.911850 | -28.137115 |
| 6 | 1.420478  | -3.911850 | -28.137115 |
| 6 | 2.677522  | -3.186094 | -28.137115 |
| 6 | 4.098000  | -0.725755 | -28.137115 |
| 6 | 4.098000  | 0.725755  | -28.137115 |
| 6 | 0.735854  | 4.149104  | -29.377181 |
| 6 | -0.735854 | 4.149104  | -29.377181 |
| 6 | -3.225303 | 2.711820  | -29.377181 |
| 6 | -3.961157 | 1.437284  | -29.377181 |
| 6 | -3.961157 | -1.437284 | -29.377181 |
| 6 | -3.225303 | -2.711820 | -29.377181 |
| 6 | -0.735854 | -4.149104 | -29.377181 |
| 6 | 0.735854  | -4.149104 | -29.377181 |
| 6 | 3.225303  | -2.711820 | -29.377181 |
| 6 | 3.961157  | -1.437284 | -29.377181 |
| 6 | 3.961157  | 1.437284  | -29.377181 |
| 6 | 3.225303  | 2.711820  | -29.377181 |
| 6 | -1.506864 | 3.995086  | -30.591450 |
| 6 | -2.706414 | 3.302526  | -30.591450 |
| 6 | -4.213278 | 0.692561  | -30.591450 |
| 6 | -4.213278 | -0.692561 | -30.591450 |
| 6 | -2.706414 | -3.302526 | -30.591450 |
| 6 | -1.506864 | -3.995086 | -30.591450 |
| 6 | 1.506864  | -3.995086 | -30.591450 |
| 6 | 2.706414  | -3.302526 | -30.591450 |
| 6 | 4.213278  | -0.692561 | -30.591450 |
| 6 | 4.213278  | 0.692561  | -30.591450 |
| 6 | 2.706414  | 3.302526  | -30.591450 |
| 6 | 1.506864  | 3.995086  | -30.591450 |
| 1 | 1.226660  | 4.274517  | 31.548363  |

|   |           |           |            |
|---|-----------|-----------|------------|
| 1 | -1.226660 | 4.274517  | 31.548363  |
| 1 | -3.088511 | 3.199577  | 31.548363  |
| 1 | -4.315170 | 1.074940  | 31.548363  |
| 1 | -4.315170 | -1.074940 | 31.548363  |
| 1 | -3.088511 | -3.199577 | 31.548363  |
| 1 | -1.226660 | -4.274517 | 31.548363  |
| 1 | 1.226660  | -4.274517 | 31.548363  |
| 1 | 3.088511  | -3.199577 | 31.548363  |
| 1 | 4.315170  | -1.074940 | 31.548363  |
| 1 | 4.315170  | 1.074940  | 31.548363  |
| 1 | 3.088511  | 3.199577  | 31.548363  |
| 1 | -1.074940 | 4.315170  | -31.548363 |
| 1 | -3.199577 | 3.088511  | -31.548363 |
| 1 | -4.274517 | 1.226660  | -31.548363 |
| 1 | -4.274517 | -1.226660 | -31.548363 |
| 1 | -3.199577 | -3.088511 | -31.548363 |
| 1 | -1.074940 | -4.315170 | -31.548363 |
| 1 | 1.074940  | -4.315170 | -31.548363 |
| 1 | 3.199577  | -3.088511 | -31.548363 |
| 1 | 4.274517  | -1.226660 | -31.548363 |
| 1 | 4.274517  | 1.226660  | -31.548363 |
| 1 | 3.199577  | 3.088511  | -31.548363 |
| 1 | 1.074940  | 4.315170  | -31.548363 |

Nanotube (6,6) u25v6s  
B3LYP/STO-3G Energy: -23054.527395

|   |             |             |             |
|---|-------------|-------------|-------------|
| C | -3.87153289 | 1.75304866  | 31.22573413 |
| C | -4.22937016 | 0.41758177  | 31.22573413 |
| C | -3.45395112 | -2.47632150 | 31.22573413 |
| C | -2.47632150 | -3.45395112 | 31.22573413 |
| C | 0.41758177  | -4.22937016 | 31.22573413 |
| C | 1.75304866  | -3.87153289 | 31.22573413 |
| C | 3.87153289  | -1.75304866 | 31.22573413 |
| C | 4.22937016  | -0.41758177 | 31.22573413 |
| C | 3.45395112  | 2.47632150  | 31.22573413 |
| C | 2.47632150  | 3.45395112  | 31.22573413 |
| C | -0.41758177 | 4.22937016  | 31.22573413 |
| C | -1.75304866 | 3.87153289  | 31.22573413 |
| C | -4.19175120 | -0.36302917 | 30.00741789 |
| C | -3.81167761 | -1.78148312 | 30.00741789 |
| C | -1.78148312 | -3.81167761 | 30.00741789 |
| C | -0.36302917 | -4.19175120 | 30.00741789 |
| C | 2.41026808  | -3.44864844 | 30.00741789 |
| C | 3.44864844  | -2.41026808 | 30.00741789 |
| C | 4.19175120  | 0.36302917  | 30.00741789 |
| C | 3.81167761  | 1.78148312  | 30.00741789 |
| C | 1.78148312  | 3.81167761  | 30.00741789 |
| C | 0.36302917  | 4.19175120  | 30.00741789 |
| C | -2.41026808 | 3.44864844  | 30.00741789 |
| C | -3.44864844 | 2.41026808  | 30.00741789 |
| C | -3.41299523 | -2.38619183 | 28.76777259 |
| C | -2.38619183 | -3.41299523 | 28.76777259 |
| C | 0.36000513  | -4.14883649 | 28.76777259 |
| C | 1.76264466  | -3.77300036 | 28.76777259 |
| C | 3.77300036  | -1.76264466 | 28.76777259 |
| C | 4.14883649  | -0.36000513 | 28.76777259 |
| C | 3.41299523  | 2.38619183  | 28.76777259 |
| C | 2.38619183  | 3.41299523  | 28.76777259 |
| C | -0.36000513 | 4.14883649  | 28.76777259 |
| C | -1.76264466 | 3.77300036  | 28.76777259 |
| C | -3.77300036 | 1.76264466  | 28.76777259 |
| C | -4.14883649 | 0.36000513  | 28.76777259 |
| C | -1.74946697 | -3.76452296 | 27.50722996 |
| C | -0.36717864 | -4.13490600 | 27.50722996 |
| C | 2.38543903  | -3.39734432 | 27.50722996 |
| C | 3.39734432  | -2.38543903 | 27.50722996 |
| C | 4.13490600  | 0.36717864  | 27.50722996 |

|   |             |             |             |
|---|-------------|-------------|-------------|
| C | 3.76452296  | 1.74946697  | 27.50722996 |
| C | 1.74946697  | 3.76452296  | 27.50722996 |
| C | 0.36717864  | 4.13490600  | 27.50722996 |
| C | -2.38543903 | 3.39734432  | 27.50722996 |
| C | -3.39734432 | 2.38543903  | 27.50722996 |
| C | -4.13490600 | -0.36717864 | 27.50722996 |
| C | -3.76452296 | -1.74946697 | 27.50722996 |
| C | 0.36290584  | -4.15204477 | 26.25373304 |
| C | 1.76173670  | -3.77722917 | 26.25373304 |
| C | 3.77722917  | -1.76173670 | 26.25373304 |
| C | 4.15204477  | -0.36290584 | 26.25373304 |
| C | 3.41432332  | 2.39030806  | 26.25373304 |
| C | 2.39030806  | 3.41432332  | 26.25373304 |
| C | -0.36290584 | 4.15204477  | 26.25373304 |
| C | -1.76173670 | 3.77722917  | 26.25373304 |
| C | -3.77722917 | 1.76173670  | 26.25373304 |
| C | -4.15204477 | 0.36290584  | 26.25373304 |
| C | -3.41432332 | -2.39030806 | 26.25373304 |
| C | -2.39030806 | -3.41432332 | 26.25373304 |
| C | 2.39170690  | -3.41694253 | 25.01028081 |
| C | 3.41694253  | -2.39170690 | 25.01028081 |
| C | 4.15501248  | 0.36280767  | 25.01028081 |
| C | 3.77975020  | 1.76330559  | 25.01028081 |
| C | 1.76330559  | 3.77975020  | 25.01028081 |
| C | 0.36280767  | 4.15501248  | 25.01028081 |
| C | -2.39170690 | 3.41694253  | 25.01028081 |
| C | -3.41694253 | 2.39170690  | 25.01028081 |
| C | -4.15501248 | -0.36280767 | 25.01028081 |
| C | -3.77975020 | -1.76330559 | 25.01028081 |
| C | -1.76330559 | -3.77975020 | 25.01028081 |
| C | -0.36280767 | -4.15501248 | 25.01028081 |
| C | 3.77569103  | -1.75611515 | 23.75727498 |
| C | 4.14790192  | -0.36700518 | 23.75727498 |
| C | 3.40868584  | 2.39178677  | 23.75727498 |
| C | 2.39178677  | 3.40868584  | 23.75727498 |
| C | -0.36700518 | 4.14790192  | 23.75727498 |
| C | -1.75611515 | 3.77569103  | 23.75727498 |
| C | -3.77569103 | 1.75611515  | 23.75727498 |
| C | -4.14790192 | 0.36700518  | 23.75727498 |
| C | -3.40868584 | -2.39178677 | 23.75727498 |
| C | -2.39178677 | -3.40868584 | 23.75727498 |
| C | 0.36700518  | -4.14790192 | 23.75727498 |
| C | 1.75611515  | -3.77569103 | 23.75727498 |
| C | 4.15512355  | 0.36471759  | 22.50298707 |
| C | 3.78080135  | 1.76170708  | 22.50298707 |
| C | 1.76170708  | 3.78080135  | 22.50298707 |
| C | 0.36471759  | 4.15512355  | 22.50298707 |
| C | -2.39341647 | 3.41608376  | 22.50298707 |
| C | -3.41608376 | 2.39341647  | 22.50298707 |
| C | -4.15512355 | -0.36471759 | 22.50298707 |
| C | -3.78080135 | -1.76170708 | 22.50298707 |
| C | -1.76170708 | -3.78080135 | 22.50298707 |
| C | -0.36471759 | -4.15512355 | 22.50298707 |
| C | 2.39341647  | -3.41608376 | 22.50298707 |
| C | 3.41608376  | -2.39341647 | 22.50298707 |
| C | 3.41925578  | 2.39359069  | 21.25739823 |
| C | 2.39359069  | 3.41925578  | 21.25739823 |
| C | -0.36328245 | 4.15795771  | 21.25739823 |
| C | -1.76436702 | 3.78253824  | 21.25739823 |
| C | -3.78253824 | 1.76436702  | 21.25739823 |
| C | -4.15795771 | 0.36328245  | 21.25739823 |
| C | -3.41925578 | -2.39359069 | 21.25739823 |
| C | -2.39359069 | -3.41925578 | 21.25739823 |
| C | 0.36328245  | -4.15795771 | 21.25739823 |
| C | 1.76436702  | -3.78253824 | 21.25739823 |
| C | 3.78253824  | -1.76436702 | 21.25739823 |
| C | 4.15795771  | -0.36328245 | 21.25739823 |
| C | 1.75790532  | 3.77788009  | 20.00698370 |
| C | 0.36654938  | 4.15069279  | 20.00698370 |
| C | -2.39278747 | 3.41133071  | 20.00698370 |

|   |             |             |             |
|---|-------------|-------------|-------------|
| C | -3.41133071 | 2.39278747  | 20.00698370 |
| C | -4.15069279 | -0.36654938 | 20.00698370 |
| C | -3.77788009 | -1.75790532 | 20.00698370 |
| C | -1.75790532 | -3.77788009 | 20.00698370 |
| C | -0.36654938 | -4.15069279 | 20.00698370 |
| C | 2.39278747  | -3.41133071 | 20.00698370 |
| C | 3.41133071  | -2.39278747 | 20.00698370 |
| C | 4.15069279  | 0.36654938  | 20.00698370 |
| C | 3.77788009  | 1.75790532  | 20.00698370 |
| C | -0.36507158 | 4.15273654  | 18.75262586 |
| C | -1.76020700 | 3.77891113  | 18.75262586 |
| C | -3.77891113 | 1.76020700  | 18.75262586 |
| C | -4.15273654 | 0.36507158  | 18.75262586 |
| C | -3.41383955 | -2.39252953 | 18.75262586 |
| C | -2.39252953 | -3.41383955 | 18.75262586 |
| C | 0.36507158  | -4.15273654 | 18.75262586 |
| C | 1.76020700  | -3.77891113 | 18.75262586 |
| C | 3.77891113  | -1.76020700 | 18.75262586 |
| C | 4.15273654  | -0.36507158 | 18.75262586 |
| C | 3.41383955  | 2.39252953  | 18.75262586 |
| C | 2.39252953  | 3.41383955  | 18.75262586 |
| C | -2.39269059 | 3.41819917  | 17.50536361 |
| C | -3.41819917 | 2.39269059  | 17.50536361 |
| C | -4.15659261 | -0.36303124 | 17.50536361 |
| C | -3.78123042 | -1.76390203 | 17.50536361 |
| C | -1.76390203 | -3.78123042 | 17.50536361 |
| C | -0.36303124 | -4.15659261 | 17.50536361 |
| C | 2.39269059  | -3.41819917 | 17.50536361 |
| C | 3.41819917  | -2.39269059 | 17.50536361 |
| C | 4.15659261  | 0.36303124  | 17.50536361 |
| C | 3.78123042  | 1.76390203  | 17.50536361 |
| C | 1.76390203  | 3.78123042  | 17.50536361 |
| C | 0.36303124  | 4.15659261  | 17.50536361 |
| C | -3.77872409 | 1.75908466  | 16.25599334 |
| C | -4.15201339 | 0.36595004  | 16.25599334 |
| C | -3.41277405 | -2.39292872 | 16.25599334 |
| C | -2.39292872 | -3.41277405 | 16.25599334 |
| C | 0.36595004  | -4.15201339 | 16.25599334 |
| C | 1.75908466  | -3.77872409 | 16.25599334 |
| C | 3.77872409  | -1.75908466 | 16.25599334 |
| C | 4.15201339  | -0.36595004 | 16.25599334 |
| C | 3.41277405  | 2.39292872  | 16.25599334 |
| C | 2.39292872  | 3.41277405  | 16.25599334 |
| C | -0.36595004 | 4.15201339  | 16.25599334 |
| C | -1.75908466 | 3.77872409  | 16.25599334 |
| C | -4.15329863 | -0.36569441 | 15.00155582 |
| C | -3.77970933 | -1.75994866 | 15.00155582 |
| C | -1.75994866 | -3.77970933 | 15.00155582 |
| C | -0.36569441 | -4.15329863 | 15.00155582 |
| C | 2.39334997  | -3.41401492 | 15.00155582 |
| C | 3.41401492  | -2.39334997 | 15.00155582 |
| C | 4.15329863  | 0.36569441  | 15.00155582 |
| C | 3.77970933  | 1.75994866  | 15.00155582 |
| C | 1.75994866  | 3.77970933  | 15.00155582 |
| C | 0.36569441  | 4.15329863  | 15.00155582 |
| C | -2.39334997 | 3.41401492  | 15.00155582 |
| C | -3.41401492 | 2.39334997  | 15.00155582 |
| C | -3.41885580 | -2.39341905 | 13.75327847 |
| C | -2.39341905 | -3.41885580 | 13.75327847 |
| C | 0.36333379  | -4.15752550 | 13.75327847 |
| C | 1.76410645  | -3.78218960 | 13.75327847 |
| C | 3.78218960  | -1.76410645 | 13.75327847 |
| C | 4.15752550  | -0.36333379 | 13.75327847 |
| C | 3.41885580  | 2.39341905  | 13.75327847 |
| C | 2.39341905  | 3.41885580  | 13.75327847 |
| C | -0.36333379 | 4.15752550  | 13.75327847 |
| C | -1.76410645 | 3.78218960  | 13.75327847 |
| C | -3.78218960 | 1.76410645  | 13.75327847 |
| C | -4.15752550 | 0.36333379  | 13.75327847 |
| C | -1.75991502 | -3.77912683 | 12.50482284 |

|   |             |             |             |
|---|-------------|-------------|-------------|
| C | -0.36543230 | -4.15277735 | 12.50482284 |
| C | 2.39286233  | -3.41369453 | 12.50482284 |
| C | 3.41369453  | -2.39286233 | 12.50482284 |
| C | 4.15277735  | 0.36543230  | 12.50482284 |
| C | 3.77912683  | 1.75991502  | 12.50482284 |
| C | 1.75991502  | 3.77912683  | 12.50482284 |
| C | 0.36543230  | 4.15277735  | 12.50482284 |
| C | -2.39286233 | 3.41369453  | 12.50482284 |
| C | -3.41369453 | 2.39286233  | 12.50482284 |
| C | -4.15277735 | -0.36543230 | 12.50482284 |
| C | -3.77912683 | -1.75991502 | 12.50482284 |
| C | 0.36586034  | -4.15198279 | 11.25059783 |
| C | 1.75914705  | -3.77865274 | 11.25059783 |
| C | 3.77865274  | -1.75914705 | 11.25059783 |
| C | 4.15198279  | -0.36586034 | 11.25059783 |
| C | 3.41279240  | 2.39283574  | 11.25059783 |
| C | 2.39283574  | 3.41279240  | 11.25059783 |
| C | -0.36586034 | 4.15198279  | 11.25059783 |
| C | -1.75914705 | 3.77865274  | 11.25059783 |
| C | -3.77865274 | 1.75914705  | 11.25059783 |
| C | -4.15198279 | 0.36586034  | 11.25059783 |
| C | -3.41279240 | -2.39283574 | 11.25059783 |
| C | -2.39283574 | -3.41279240 | 11.25059783 |
| C | 2.39336145  | -3.41829445 | 10.00135178 |
| C | 3.41829445  | -2.39336145 | 10.00135178 |
| C | 4.15701055  | 0.36356459  | 10.00135178 |
| C | 3.78185904  | 1.76364910  | 10.00135178 |
| C | 1.76364910  | 3.78185904  | 10.00135178 |
| C | 0.36356459  | 4.15701055  | 10.00135178 |
| C | -2.39336145 | 3.41829445  | 10.00135178 |
| C | -3.41829445 | 2.39336145  | 10.00135178 |
| C | -4.15701055 | -0.36356459 | 10.00135178 |
| C | -3.78185904 | -1.76364910 | 10.00135178 |
| C | -1.76364910 | -3.78185904 | 10.00135178 |
| C | -0.36356459 | -4.15701055 | 10.00135178 |
| C | 3.77970587  | -1.76056116 | 8.75393233  |
| C | 4.15360188  | -0.36516225 | 8.75393233  |
| C | 3.41454362  | 2.39304072  | 8.75393233  |
| C | 2.39304072  | 3.41454362  | 8.75393233  |
| C | -0.36516225 | 4.15360188  | 8.75393233  |
| C | -1.76056116 | 3.77970587  | 8.75393233  |
| C | -3.77970587 | 1.76056116  | 8.75393233  |
| C | -4.15360188 | 0.36516225  | 8.75393233  |
| C | -3.41454362 | -2.39304072 | 8.75393233  |
| C | -2.39304072 | -3.41454362 | 8.75393233  |
| C | 0.36516225  | -4.15360188 | 8.75393233  |
| C | 1.76056116  | -3.77970587 | 8.75393233  |
| C | 4.15118054  | 0.36613198  | 7.50061102  |
| C | 3.77809380  | 1.75851068  | 7.50061102  |
| C | 1.75851068  | 3.77809380  | 7.50061102  |
| C | 0.36613198  | 4.15118054  | 7.50061102  |
| C | -2.39266987 | 3.41196182  | 7.50061102  |
| C | -3.41196182 | 2.39266987  | 7.50061102  |
| C | -4.15118054 | -0.36613198 | 7.50061102  |
| C | -3.77809380 | -1.75851068 | 7.50061102  |
| C | -1.75851068 | -3.77809380 | 7.50061102  |
| C | -0.36613198 | -4.15118054 | 7.50061102  |
| C | 2.39266987  | -3.41196182 | 7.50061102  |
| C | 3.41196182  | -2.39266987 | 7.50061102  |
| C | 3.41729416  | 2.39302309  | 6.25074931  |
| C | 2.39302309  | 3.41729416  | 6.25074931  |
| C | -0.36377171 | 4.15597510  | 6.25074931  |
| C | -1.76295201 | 3.78106587  | 6.25074931  |
| C | -3.78106587 | 1.76295201  | 6.25074931  |
| C | -4.15597510 | 0.36377171  | 6.25074931  |
| C | -3.41729416 | -2.39302309 | 6.25074931  |
| C | -2.39302309 | -3.41729416 | 6.25074931  |
| C | 0.36377171  | -4.15597510 | 6.25074931  |
| C | 1.76295201  | -3.78106587 | 6.25074931  |
| C | 3.78106587  | -1.76295201 | 6.25074931  |

|   |             |             |             |
|---|-------------|-------------|-------------|
| C | 4.15597510  | -0.36377171 | 6.25074931  |
| C | 1.76114212  | 3.77978290  | 5.00380122  |
| C | 0.36469763  | 4.15395907  | 5.00380122  |
| C | -2.39281695 | 3.41508527  | 5.00380122  |
| C | -3.41508527 | 2.39281695  | 5.00380122  |
| C | -4.15395907 | -0.36469763 | 5.00380122  |
| C | -3.77978290 | -1.76114212 | 5.00380122  |
| C | -1.76114212 | -3.77978290 | 5.00380122  |
| C | -0.36469763 | -4.15395907 | 5.00380122  |
| C | 2.39281695  | -3.41508527 | 5.00380122  |
| C | 3.41508527  | -2.39281695 | 5.00380122  |
| C | 4.15395907  | 0.36469763  | 5.00380122  |
| C | 3.77978290  | 1.76114212  | 5.00380122  |
| C | -0.36613166 | 4.15066352  | 3.75087462  |
| C | -1.75825244 | 3.77764588  | 3.75087462  |
| C | -3.77764588 | 1.75825244  | 3.75087462  |
| C | -4.15066352 | 0.36613166  | 3.75087462  |
| C | -3.41151422 | -2.39241108 | 3.75087462  |
| C | -2.39241108 | -3.41151422 | 3.75087462  |
| C | 0.36613166  | -4.15066352 | 3.75087462  |
| C | 1.75825244  | -3.77764588 | 3.75087462  |
| C | 3.77764588  | -1.75825244 | 3.75087462  |
| C | 4.15066352  | -0.36613166 | 3.75087462  |
| C | 3.41151422  | 2.39241108  | 3.75087462  |
| C | 2.39241108  | 3.41151422  | 3.75087462  |
| C | -2.39276622 | 3.41655665  | 2.49967237  |
| C | -3.41655665 | 2.39276622  | 2.49967237  |
| C | -4.15520796 | -0.36391801 | 2.49967237  |
| C | -3.78047466 | -1.76244174 | 2.49967237  |
| C | -1.76244174 | -3.78047466 | 2.49967237  |
| C | -0.36391801 | -4.15520796 | 2.49967237  |
| C | 2.39276622  | -3.41655665 | 2.49967237  |
| C | 3.41655665  | -2.39276622 | 2.49967237  |
| C | 4.15520796  | 0.36391801  | 2.49967237  |
| C | 3.78047466  | 1.76244174  | 2.49967237  |
| C | 1.76244174  | 3.78047466  | 2.49967237  |
| C | 0.36391801  | 4.15520796  | 2.49967237  |
| C | -3.78003939 | 1.76185298  | 1.25234521  |
| C | -4.15453663 | 0.36421026  | 1.25234521  |
| C | -3.41582913 | -2.39268365 | 1.25234521  |
| C | -2.39268365 | -3.41582913 | 1.25234521  |
| C | 0.36421026  | -4.15453663 | 1.25234521  |
| C | 1.76185298  | -3.78003939 | 1.25234521  |
| C | 3.78003939  | -1.76185298 | 1.25234521  |
| C | 4.15453663  | -0.36421026 | 1.25234521  |
| C | 3.41582913  | 2.39268365  | 1.25234521  |
| C | 2.39268365  | 3.41582913  | 1.25234521  |
| C | -0.36421026 | 4.15453663  | 1.25234521  |
| C | -1.76185298 | 3.78003939  | 1.25234521  |
| C | -4.15044785 | -0.36606745 | 0.00000000  |
| C | -3.77742700 | -1.75820022 | 0.00000000  |
| C | -1.75820022 | -3.77742700 | 0.00000000  |
| C | -0.36606745 | -4.15044785 | 0.00000000  |
| C | 2.39224763  | -3.41135955 | 0.00000000  |
| C | 3.41135955  | -2.39224763 | 0.00000000  |
| C | 4.15044785  | 0.36606745  | 0.00000000  |
| C | 3.77742700  | 1.75820022  | 0.00000000  |
| C | 1.75820022  | 3.77742700  | 0.00000000  |
| C | 0.36606745  | 4.15044785  | 0.00000000  |
| C | -2.39224763 | 3.41135955  | 0.00000000  |
| C | -3.41135955 | 2.39224763  | 0.00000000  |
| C | -3.41582913 | -2.39268365 | -1.25234521 |
| C | -2.39268365 | -3.41582913 | -1.25234521 |
| C | 0.36421026  | -4.15453663 | -1.25234521 |
| C | 1.76185298  | -3.78003939 | -1.25234521 |
| C | 3.78003939  | -1.76185298 | -1.25234521 |
| C | 4.15453663  | -0.36421026 | -1.25234521 |
| C | 3.41582913  | 2.39268365  | -1.25234521 |
| C | 2.39268365  | 3.41582913  | -1.25234521 |
| C | -0.36421026 | 4.15453663  | -1.25234521 |

|   |             |             |             |
|---|-------------|-------------|-------------|
| C | -1.76185298 | 3.78003939  | -1.25234521 |
| C | -3.78003939 | 1.76185298  | -1.25234521 |
| C | -4.15453663 | 0.36421026  | -1.25234521 |
| C | -1.76244174 | -3.78047466 | -2.49967237 |
| C | -0.36391801 | -4.15520796 | -2.49967237 |
| C | 2.39276622  | -3.41655665 | -2.49967237 |
| C | 3.41655665  | -2.39276622 | -2.49967237 |
| C | 4.15520796  | 0.36391801  | -2.49967237 |
| C | 3.78047466  | 1.76244174  | -2.49967237 |
| C | 1.76244174  | 3.78047466  | -2.49967237 |
| C | 0.36391801  | 4.15520796  | -2.49967237 |
| C | -2.39276622 | 3.41655665  | -2.49967237 |
| C | -3.41655665 | 2.39276622  | -2.49967237 |
| C | -4.15520796 | -0.36391801 | -2.49967237 |
| C | -3.78047466 | -1.76244174 | -2.49967237 |
| C | 0.36613166  | -4.15066352 | -3.75087462 |
| C | 1.75825244  | -3.77764588 | -3.75087462 |
| C | 3.77764588  | -1.75825244 | -3.75087462 |
| C | 4.15066352  | -0.36613166 | -3.75087462 |
| C | 3.41151422  | 2.39241108  | -3.75087462 |
| C | 2.39241108  | 3.41151422  | -3.75087462 |
| C | -0.36613166 | 4.15066352  | -3.75087462 |
| C | -1.75825244 | 3.77764588  | -3.75087462 |
| C | -3.77764588 | 1.75825244  | -3.75087462 |
| C | -4.15066352 | 0.36613166  | -3.75087462 |
| C | -3.41151422 | -2.39241108 | -3.75087462 |
| C | -2.39241108 | -3.41151422 | -3.75087462 |
| C | 2.39281695  | -3.41508527 | -5.00380122 |
| C | 3.41508527  | -2.39281695 | -5.00380122 |
| C | 4.15395907  | 0.36469763  | -5.00380122 |
| C | 3.77978290  | 1.76114212  | -5.00380122 |
| C | 1.76114212  | 3.77978290  | -5.00380122 |
| C | 0.36469763  | 4.15395907  | -5.00380122 |
| C | -2.39281695 | 3.41508527  | -5.00380122 |
| C | -3.41508527 | 2.39281695  | -5.00380122 |
| C | -4.15395907 | -0.36469763 | -5.00380122 |
| C | -3.77978290 | -1.76114212 | -5.00380122 |
| C | -1.76114212 | -3.77978290 | -5.00380122 |
| C | -0.36469763 | -4.15395907 | -5.00380122 |
| C | 3.78106587  | -1.76295201 | -6.25074931 |
| C | 4.15597510  | -0.36377171 | -6.25074931 |
| C | 3.41729416  | 2.39302309  | -6.25074931 |
| C | 2.39302309  | 3.41729416  | -6.25074931 |
| C | -0.36377171 | 4.15597510  | -6.25074931 |
| C | -1.76295201 | 3.78106587  | -6.25074931 |
| C | -3.78106587 | 1.76295201  | -6.25074931 |
| C | -4.15597510 | 0.36377171  | -6.25074931 |
| C | -3.41729416 | -2.39302309 | -6.25074931 |
| C | -2.39302309 | -3.41729416 | -6.25074931 |
| C | 0.36377171  | -4.15597510 | -6.25074931 |
| C | 1.76295201  | -3.78106587 | -6.25074931 |
| C | 4.15118054  | 0.36613198  | -7.50061102 |
| C | 3.77809380  | 1.75851068  | -7.50061102 |
| C | 1.75851068  | 3.77809380  | -7.50061102 |
| C | 0.36613198  | 4.15118054  | -7.50061102 |
| C | -2.39266987 | 3.41196182  | -7.50061102 |
| C | -3.41196182 | 2.39266987  | -7.50061102 |
| C | -4.15118054 | -0.36613198 | -7.50061102 |
| C | -3.77809380 | -1.75851068 | -7.50061102 |
| C | -1.75851068 | -3.77809380 | -7.50061102 |
| C | -0.36613198 | -4.15118054 | -7.50061102 |
| C | 2.39266987  | -3.41196182 | -7.50061102 |
| C | 3.41196182  | -2.39266987 | -7.50061102 |
| C | 3.41454362  | 2.39304072  | -8.75393233 |
| C | 2.39304072  | 3.41454362  | -8.75393233 |
| C | -0.36516225 | 4.15360188  | -8.75393233 |
| C | -1.76056116 | 3.77970587  | -8.75393233 |
| C | -3.77970587 | 1.76056116  | -8.75393233 |
| C | -4.15360188 | 0.36516225  | -8.75393233 |
| C | -3.41454362 | -2.39304072 | -8.75393233 |

|   |             |             |              |
|---|-------------|-------------|--------------|
| C | -2.39304072 | -3.41454362 | -8.75393233  |
| C | 0.36516225  | -4.15360188 | -8.75393233  |
| C | 1.76056116  | -3.77970587 | -8.75393233  |
| C | 3.77970587  | -1.76056116 | -8.75393233  |
| C | 4.15360188  | -0.36516225 | -8.75393233  |
| C | 1.76364910  | 3.78185904  | -10.00135178 |
| C | 0.36356459  | 4.15701055  | -10.00135178 |
| C | -2.39336145 | 3.41829445  | -10.00135178 |
| C | -3.41829445 | 2.39336145  | -10.00135178 |
| C | -4.15701055 | -0.36356459 | -10.00135178 |
| C | -3.78185904 | -1.76364910 | -10.00135178 |
| C | -1.76364910 | -3.78185904 | -10.00135178 |
| C | -0.36356459 | -4.15701055 | -10.00135178 |
| C | 2.39336145  | -3.41829445 | -10.00135178 |
| C | 3.41829445  | -2.39336145 | -10.00135178 |
| C | 4.15701055  | 0.36356459  | -10.00135178 |
| C | 3.78185904  | 1.76364910  | -10.00135178 |
| C | -0.36586034 | 4.15198279  | -11.25059783 |
| C | -1.75914705 | 3.77865274  | -11.25059783 |
| C | -3.77865274 | 1.75914705  | -11.25059783 |
| C | -4.15198279 | 0.36586034  | -11.25059783 |
| C | -3.41279240 | -2.39283574 | -11.25059783 |
| C | -2.39283574 | -3.41279240 | -11.25059783 |
| C | 0.36586034  | -4.15198279 | -11.25059783 |
| C | 1.75914705  | -3.77865274 | -11.25059783 |
| C | 3.77865274  | -1.75914705 | -11.25059783 |
| C | 4.15198279  | -0.36586034 | -11.25059783 |
| C | 3.41279240  | 2.39283574  | -11.25059783 |
| C | 2.39283574  | 3.41279240  | -11.25059783 |
| C | -2.39286233 | 3.41369453  | -12.50482284 |
| C | -3.41369453 | 2.39286233  | -12.50482284 |
| C | -4.15277735 | -0.36543230 | -12.50482284 |
| C | -3.77912683 | -1.75991502 | -12.50482284 |
| C | -1.75991502 | -3.77912683 | -12.50482284 |
| C | -0.36543230 | -4.15277735 | -12.50482284 |
| C | 2.39286233  | -3.41369453 | -12.50482284 |
| C | 3.41369453  | -2.39286233 | -12.50482284 |
| C | 4.15277735  | 0.36543230  | -12.50482284 |
| C | 3.77912683  | 1.75991502  | -12.50482284 |
| C | 1.75991502  | 3.77912683  | -12.50482284 |
| C | 0.36543230  | 4.15277735  | -12.50482284 |
| C | -3.78218960 | 1.76410645  | -13.75327847 |
| C | -4.15752550 | 0.36333379  | -13.75327847 |
| C | -3.41885580 | -2.39341905 | -13.75327847 |
| C | -2.39341905 | -3.41885580 | -13.75327847 |
| C | 0.36333379  | -4.15752550 | -13.75327847 |
| C | 1.76410645  | -3.78218960 | -13.75327847 |
| C | 3.78218960  | -1.76410645 | -13.75327847 |
| C | 4.15752550  | -0.36333379 | -13.75327847 |
| C | 3.41885580  | 2.39341905  | -13.75327847 |
| C | 2.39341905  | 3.41885580  | -13.75327847 |
| C | -0.36333379 | 4.15752550  | -13.75327847 |
| C | -1.76410645 | 3.78218960  | -13.75327847 |
| C | -4.15329863 | -0.36569441 | -15.00155582 |
| C | -3.77970933 | -1.75994866 | -15.00155582 |
| C | -1.75994866 | -3.77970933 | -15.00155582 |
| C | -0.36569441 | -4.15329863 | -15.00155582 |
| C | 2.39334997  | -3.41401492 | -15.00155582 |
| C | 3.41401492  | -2.39334997 | -15.00155582 |
| C | 4.15329863  | 0.36569441  | -15.00155582 |
| C | 3.77970933  | 1.75994866  | -15.00155582 |
| C | 1.75994866  | 3.77970933  | -15.00155582 |
| C | 0.36569441  | 4.15329863  | -15.00155582 |
| C | -2.39334997 | 3.41401492  | -15.00155582 |
| C | -3.41401492 | 2.39334997  | -15.00155582 |
| C | -3.41277405 | -2.39292872 | -16.25599334 |
| C | -2.39292872 | -3.41277405 | -16.25599334 |
| C | 0.36595004  | -4.15201339 | -16.25599334 |
| C | 1.75908466  | -3.77872409 | -16.25599334 |
| C | 3.77872409  | -1.75908466 | -16.25599334 |



|   |             |             |              |
|---|-------------|-------------|--------------|
| C | 4.15201339  | -0.36595004 | -16.25599334 |
| C | 3.41277405  | 2.39292872  | -16.25599334 |
| C | 2.39292872  | 3.41277405  | -16.25599334 |
| C | -0.36595004 | 4.15201339  | -16.25599334 |
| C | -1.75908466 | 3.77872409  | -16.25599334 |
| C | -3.77872409 | 1.75908466  | -16.25599334 |
| C | -4.15201339 | 0.36595004  | -16.25599334 |
| C | -1.76390203 | -3.78123042 | -17.50536361 |
| C | -0.36303124 | -4.15659261 | -17.50536361 |
| C | 2.39269059  | -3.41819917 | -17.50536361 |
| C | 3.41819917  | -2.39269059 | -17.50536361 |
| C | 4.15659261  | 0.36303124  | -17.50536361 |
| C | 3.78123042  | 1.76390203  | -17.50536361 |
| C | 1.76390203  | 3.78123042  | -17.50536361 |
| C | 0.36303124  | 4.15659261  | -17.50536361 |
| C | -2.39269059 | 3.41819917  | -17.50536361 |
| C | -3.41819917 | 2.39269059  | -17.50536361 |
| C | -4.15659261 | -0.36303124 | -17.50536361 |
| C | -3.78123042 | -1.76390203 | -17.50536361 |
| C | 0.36507158  | -4.15273654 | -18.75262586 |
| C | 1.76020700  | -3.77891113 | -18.75262586 |
| C | 3.77891113  | -1.76020700 | -18.75262586 |
| C | 4.15273654  | -0.36507158 | -18.75262586 |
| C | 3.41383955  | 2.39252953  | -18.75262586 |
| C | 2.39252953  | 3.41383955  | -18.75262586 |
| C | -0.36507158 | 4.15273654  | -18.75262586 |
| C | -1.76020700 | 3.77891113  | -18.75262586 |
| C | -3.77891113 | 1.76020700  | -18.75262586 |
| C | -4.15273654 | 0.36507158  | -18.75262586 |
| C | -3.41383955 | -2.39252953 | -18.75262586 |
| C | -2.39252953 | -3.41383955 | -18.75262586 |
| C | 2.39278747  | -3.41133071 | -20.00698370 |
| C | 3.41133071  | -2.39278747 | -20.00698370 |
| C | 4.15069279  | 0.36654938  | -20.00698370 |
| C | 3.77788009  | 1.75790532  | -20.00698370 |
| C | 1.75790532  | 3.77788009  | -20.00698370 |
| C | 0.36654938  | 4.15069279  | -20.00698370 |
| C | -2.39278747 | 3.41133071  | -20.00698370 |
| C | -3.41133071 | 2.39278747  | -20.00698370 |
| C | -4.15069279 | -0.36654938 | -20.00698370 |
| C | -3.77788009 | -1.75790532 | -20.00698370 |
| C | -1.75790532 | -3.77788009 | -20.00698370 |
| C | -0.36654938 | -4.15069279 | -20.00698370 |
| C | 3.78253824  | -1.76436702 | -21.25739823 |
| C | 4.15795771  | -0.36328245 | -21.25739823 |
| C | 3.41925578  | 2.39359069  | -21.25739823 |
| C | 2.39359069  | 3.41925578  | -21.25739823 |
| C | -0.36328245 | 4.15795771  | -21.25739823 |
| C | -1.76436702 | 3.78253824  | -21.25739823 |
| C | -3.78253824 | 1.76436702  | -21.25739823 |
| C | -4.15795771 | 0.36328245  | -21.25739823 |
| C | -3.41925578 | -2.39359069 | -21.25739823 |
| C | -2.39359069 | -3.41925578 | -21.25739823 |
| C | 0.36328245  | -4.15795771 | -21.25739823 |
| C | 1.76436702  | -3.78253824 | -21.25739823 |
| C | 4.15512355  | 0.36471759  | -22.50298707 |
| C | 3.78080135  | 1.76170708  | -22.50298707 |
| C | 1.76170708  | 3.78080135  | -22.50298707 |
| C | 0.36471759  | 4.15512355  | -22.50298707 |
| C | -2.39341647 | 3.41608376  | -22.50298707 |
| C | -3.41608376 | 2.39341647  | -22.50298707 |
| C | -4.15512355 | -0.36471759 | -22.50298707 |
| C | -3.78080135 | -1.76170708 | -22.50298707 |
| C | -1.76170708 | -3.78080135 | -22.50298707 |
| C | -0.36471759 | -4.15512355 | -22.50298707 |
| C | 2.39341647  | -3.41608376 | -22.50298707 |
| C | 3.41608376  | -2.39341647 | -22.50298707 |
| C | 3.40868584  | 2.39178677  | -23.75727498 |
| C | 2.39178677  | 3.40868584  | -23.75727498 |
| C | -0.36700518 | 4.14790192  | -23.75727498 |

|   |             |             |              |
|---|-------------|-------------|--------------|
| C | -1.75611515 | 3.77569103  | -23.75727498 |
| C | -3.77569103 | 1.75611515  | -23.75727498 |
| C | -4.14790192 | 0.36700518  | -23.75727498 |
| C | -3.40868584 | -2.39178677 | -23.75727498 |
| C | -2.39178677 | -3.40868584 | -23.75727498 |
| C | 0.36700518  | -4.14790192 | -23.75727498 |
| C | 1.75611515  | -3.77569103 | -23.75727498 |
| C | 3.77569103  | -1.75611515 | -23.75727498 |
| C | 4.14790192  | -0.36700518 | -23.75727498 |
| C | 1.76330559  | 3.77975020  | -25.01028081 |
| C | 0.36280767  | 4.15501248  | -25.01028081 |
| C | -2.39170690 | 3.41694253  | -25.01028081 |
| C | -3.41694253 | 2.39170690  | -25.01028081 |
| C | -4.15501248 | -0.36280767 | -25.01028081 |
| C | -3.77975020 | -1.76330559 | -25.01028081 |
| C | -1.76330559 | -3.77975020 | -25.01028081 |
| C | -0.36280767 | -4.15501248 | -25.01028081 |
| C | 2.39170690  | -3.41694253 | -25.01028081 |
| C | 3.41694253  | -2.39170690 | -25.01028081 |
| C | 4.15501248  | 0.36280767  | -25.01028081 |
| C | 3.77975020  | 1.76330559  | -25.01028081 |
| C | -0.36290584 | 4.15204477  | -26.25373304 |
| C | -1.76173670 | 3.77722917  | -26.25373304 |
| C | -3.77722917 | 1.76173670  | -26.25373304 |
| C | -4.15204477 | 0.36290584  | -26.25373304 |
| C | -3.41432332 | -2.39030806 | -26.25373304 |
| C | -2.39030806 | -3.41432332 | -26.25373304 |
| C | 0.36290584  | -4.15204477 | -26.25373304 |
| C | 1.76173670  | -3.77722917 | -26.25373304 |
| C | 3.77722917  | -1.76173670 | -26.25373304 |
| C | 4.15204477  | -0.36290584 | -26.25373304 |
| C | 3.41432332  | 2.39030806  | -26.25373304 |
| C | 2.39030806  | 3.41432332  | -26.25373304 |
| C | -2.38543903 | 3.39734432  | -27.50722996 |
| C | -3.39734432 | 2.38543903  | -27.50722996 |
| C | -4.13490600 | -0.36717864 | -27.50722996 |
| C | -3.76452296 | -1.74946697 | -27.50722996 |
| C | -1.74946697 | -3.76452296 | -27.50722996 |
| C | -0.36717864 | -4.13490600 | -27.50722996 |
| C | 2.38543903  | -3.39734432 | -27.50722996 |
| C | 3.39734432  | -2.38543903 | -27.50722996 |
| C | 4.13490600  | 0.36717864  | -27.50722996 |
| C | 3.76452296  | 1.74946697  | -27.50722996 |
| C | 1.74946697  | 3.76452296  | -27.50722996 |
| C | 0.36717864  | 4.13490600  | -27.50722996 |
| C | -3.77300036 | 1.76264466  | -28.76777259 |
| C | -4.14883649 | 0.36000513  | -28.76777259 |
| C | -3.41299523 | -2.38619183 | -28.76777259 |
| C | -2.38619183 | -3.41299523 | -28.76777259 |
| C | 0.36000513  | -4.14883649 | -28.76777259 |
| C | 1.76264466  | -3.77300036 | -28.76777259 |
| C | 3.77300036  | -1.76264466 | -28.76777259 |
| C | 4.14883649  | -0.36000513 | -28.76777259 |
| C | 3.41299523  | 2.38619183  | -28.76777259 |
| C | 2.38619183  | 3.41299523  | -28.76777259 |
| C | -0.36000513 | 4.14883649  | -28.76777259 |
| C | -1.76264466 | 3.77300036  | -28.76777259 |
| C | -4.19175120 | -0.36302917 | -30.00741789 |
| C | -3.81167761 | -1.78148312 | -30.00741789 |
| C | -1.78148312 | -3.81167761 | -30.00741789 |
| C | -0.36302917 | -4.19175120 | -30.00741789 |
| C | 2.41026808  | -3.44864844 | -30.00741789 |
| C | 3.44864844  | -2.41026808 | -30.00741789 |
| C | 4.19175120  | 0.36302917  | -30.00741789 |
| C | 3.81167761  | 1.78148312  | -30.00741789 |
| C | 1.78148312  | 3.81167761  | -30.00741789 |
| C | 0.36302917  | 4.19175120  | -30.00741789 |
| C | -2.41026808 | 3.44864844  | -30.00741789 |
| C | -3.44864844 | 2.41026808  | -30.00741789 |
| C | -3.45395112 | -2.47632150 | -31.22573413 |

|   |             |             |              |
|---|-------------|-------------|--------------|
| C | -2.47632150 | -3.45395112 | -31.22573413 |
| C | 0.41758177  | -4.22937016 | -31.22573413 |
| C | 1.75304866  | -3.87153289 | -31.22573413 |
| C | 3.87153289  | -1.75304866 | -31.22573413 |
| C | 4.22937016  | -0.41758177 | -31.22573413 |
| C | 3.45395112  | 2.47632150  | -31.22573413 |
| C | 2.47632150  | 3.45395112  | -31.22573413 |
| C | -0.41758177 | 4.22937016  | -31.22573413 |
| C | -1.75304866 | 3.87153289  | -31.22573413 |
| C | -3.87153289 | 1.75304866  | -31.22573413 |
| C | -4.22937016 | 0.41758177  | -31.22573413 |
| H | -3.77672401 | 2.28135263  | 32.18262780  |
| H | -4.41141525 | -0.08734733 | 32.18262780  |
| H | -3.86407134 | -2.13006262 | 32.18262780  |
| H | -2.13006262 | -3.86407134 | 32.18262780  |
| H | -0.08734733 | -4.41141525 | 32.18262780  |
| H | 2.28135263  | -3.77672401 | 32.18262780  |
| H | 3.77672401  | -2.28135263 | 32.18262780  |
| H | 4.41141525  | 0.08734733  | 32.18262780  |
| H | 3.86407134  | 2.13006262  | 32.18262780  |
| H | 2.13006262  | 3.86407134  | 32.18262780  |
| H | 0.08734733  | 4.41141525  | 32.18262780  |
| H | -2.28135263 | 3.77672401  | 32.18262780  |
| H | -3.86407134 | -2.13006262 | -32.18262780 |
| H | -2.13006262 | -3.86407134 | -32.18262780 |
| H | -0.08734733 | -4.41141525 | -32.18262780 |
| H | 2.28135263  | -3.77672401 | -32.18262780 |
| H | 3.77672401  | -2.28135263 | -32.18262780 |
| H | 4.41141525  | 0.08734733  | -32.18262780 |
| H | 3.86407134  | 2.13006262  | -32.18262780 |
| H | 2.13006262  | 3.86407134  | -32.18262780 |
| H | 0.08734733  | 4.41141525  | -32.18262780 |
| H | -2.28135263 | 3.77672401  | -32.18262780 |
| H | -3.77672401 | 2.28135263  | -32.18262780 |
| H | -4.41141525 | -0.08734733 | -32.18262780 |

Nanotube (6,6) u26v0s  
B3LYP/STO-3G Energy: -23506.301085

|   |           |           |           |
|---|-----------|-----------|-----------|
| 6 | 3.993293  | 1.506696  | 33.098182 |
| 6 | 3.301484  | 2.704945  | 33.098182 |
| 6 | 0.691809  | 4.211641  | 33.098182 |
| 6 | -0.691809 | 4.211641  | 33.098182 |
| 6 | -3.301484 | 2.704945  | 33.098182 |
| 6 | -3.993293 | 1.506696  | 33.098182 |
| 6 | -3.993293 | -1.506696 | 33.098182 |
| 6 | -3.301484 | -2.704945 | 33.098182 |
| 6 | -0.691809 | -4.211641 | 33.098182 |
| 6 | 0.691809  | -4.211641 | 33.098182 |
| 6 | 3.301484  | -2.704945 | 33.098182 |
| 6 | 3.993293  | -1.506696 | 33.098182 |
| 6 | 2.709718  | 3.224064  | 31.882348 |
| 6 | 1.437262  | 3.958717  | 31.882348 |
| 6 | -1.437262 | 3.958717  | 31.882348 |
| 6 | -2.709718 | 3.224064  | 31.882348 |
| 6 | -4.146980 | 0.734653  | 31.882348 |
| 6 | -4.146980 | -0.734653 | 31.882348 |
| 6 | -2.709718 | -3.224064 | 31.882348 |
| 6 | -1.437262 | -3.958717 | 31.882348 |
| 6 | 1.437262  | -3.958717 | 31.882348 |
| 6 | 2.709718  | -3.224064 | 31.882348 |
| 6 | 4.146980  | -0.734653 | 31.882348 |
| 6 | 4.146980  | 0.734653  | 31.882348 |
| 6 | 0.726118  | 4.098106  | 30.642216 |
| 6 | -0.726118 | 4.098106  | 30.642216 |
| 6 | -3.186005 | 2.677889  | 30.642216 |
| 6 | -3.912123 | 1.420217  | 30.642216 |
| 6 | -3.912123 | -1.420217 | 30.642216 |

|   |           |           |           |
|---|-----------|-----------|-----------|
| 6 | -3.186005 | -2.677889 | 30.642216 |
| 6 | -0.726118 | -4.098106 | 30.642216 |
| 6 | 0.726118  | -4.098106 | 30.642216 |
| 6 | 3.186005  | -2.677889 | 30.642216 |
| 6 | 3.912123  | -1.420217 | 30.642216 |
| 6 | 3.912123  | 1.420217  | 30.642216 |
| 6 | 3.186005  | 2.677889  | 30.642216 |
| 6 | -1.424186 | 3.897196  | 29.381091 |
| 6 | -2.662978 | 3.181980  | 29.381091 |
| 6 | -4.087164 | 0.715217  | 29.381091 |
| 6 | -4.087164 | -0.715217 | 29.381091 |
| 6 | -2.662978 | -3.181980 | 29.381091 |
| 6 | -1.424186 | -3.897196 | 29.381091 |
| 6 | 1.424186  | -3.897196 | 29.381091 |
| 6 | 2.662978  | -3.181980 | 29.381091 |
| 6 | 4.087164  | -0.715217 | 29.381091 |
| 6 | 4.087164  | 0.715217  | 29.381091 |
| 6 | 2.662978  | 3.181980  | 29.381091 |
| 6 | 1.424186  | 3.897196  | 29.381091 |
| 6 | -3.191511 | 2.678410  | 28.127324 |
| 6 | -3.915326 | 1.424725  | 28.127324 |
| 6 | -3.915326 | -1.424725 | 28.127324 |
| 6 | -3.191511 | -2.678410 | 28.127324 |
| 6 | -0.723816 | -4.103134 | 28.127324 |
| 6 | 0.723816  | -4.103134 | 28.127324 |
| 6 | 3.191511  | -2.678410 | 28.127324 |
| 6 | 3.915326  | -1.424725 | 28.127324 |
| 6 | 3.915326  | 1.424725  | 28.127324 |
| 6 | 3.191511  | 2.678410  | 28.127324 |
| 6 | 0.723816  | 4.103134  | 28.127324 |
| 6 | -0.723816 | 4.103134  | 28.127324 |
| 6 | -4.108553 | 0.724964  | 26.883921 |
| 6 | -4.108553 | -0.724964 | 26.883921 |
| 6 | -2.682113 | -3.195629 | 26.883921 |
| 6 | -1.426439 | -3.920593 | 26.883921 |
| 6 | 1.426439  | -3.920593 | 26.883921 |
| 6 | 2.682113  | -3.195629 | 26.883921 |
| 6 | 4.108553  | -0.724964 | 26.883921 |
| 6 | 4.108553  | 0.724964  | 26.883921 |
| 6 | 2.682113  | 3.195629  | 26.883921 |
| 6 | 1.426439  | 3.920593  | 26.883921 |
| 6 | -1.426439 | 3.920593  | 26.883921 |
| 6 | -2.682113 | 3.195629  | 26.883921 |
| 6 | -3.912909 | -1.428654 | 25.631320 |
| 6 | -3.193705 | -2.674351 | 25.631320 |
| 6 | -0.719203 | -4.103005 | 25.631320 |
| 6 | 0.719203  | -4.103005 | 25.631320 |
| 6 | 3.193705  | -2.674351 | 25.631320 |
| 6 | 3.912909  | -1.428654 | 25.631320 |
| 6 | 3.912909  | 1.428654  | 25.631320 |
| 6 | 3.193705  | 2.674351  | 25.631320 |
| 6 | 0.719203  | 4.103005  | 25.631320 |
| 6 | -0.719203 | 4.103005  | 25.631320 |
| 6 | -3.193705 | 2.674351  | 25.631320 |
| 6 | -3.912909 | 1.428654  | 25.631320 |
| 6 | -2.679937 | -3.195486 | 24.377192 |
| 6 | -1.427403 | -3.918637 | 24.377192 |
| 6 | 1.427403  | -3.918637 | 24.377192 |
| 6 | 2.679937  | -3.195486 | 24.377192 |
| 6 | 4.107340  | -0.723151 | 24.377192 |
| 6 | 4.107340  | 0.723151  | 24.377192 |
| 6 | 2.679937  | 3.195486  | 24.377192 |
| 6 | 1.427403  | 3.918637  | 24.377192 |
| 6 | -1.427403 | 3.918637  | 24.377192 |
| 6 | -2.679937 | 3.195486  | 24.377192 |
| 6 | -4.107340 | 0.723151  | 24.377192 |
| 6 | -4.107340 | -0.723151 | 24.377192 |
| 6 | -0.725135 | -4.109590 | 23.131631 |
| 6 | 0.725135  | -4.109590 | 23.131631 |
| 6 | 3.196442  | -2.682780 | 23.131631 |

|   |           |           |           |
|---|-----------|-----------|-----------|
| 6 | 3.921576  | -1.426810 | 23.131631 |
| 6 | 3.921576  | 1.426810  | 23.131631 |
| 6 | 3.196442  | 2.682780  | 23.131631 |
| 6 | 0.725135  | 4.109590  | 23.131631 |
| 6 | -0.725135 | 4.109590  | 23.131631 |
| 6 | -3.196442 | 2.682780  | 23.131631 |
| 6 | -3.921576 | 1.426810  | 23.131631 |
| 6 | -3.921576 | -1.426810 | 23.131631 |
| 6 | -3.196442 | -2.682780 | 23.131631 |
| 6 | 1.428041  | -3.913898 | 21.881117 |
| 6 | 2.675514  | -3.193668 | 21.881117 |
| 6 | 4.103555  | -0.720229 | 21.881117 |
| 6 | 4.103555  | 0.720229  | 21.881117 |
| 6 | 2.675514  | 3.193668  | 21.881117 |
| 6 | 1.428041  | 3.913898  | 21.881117 |
| 6 | -1.428041 | 3.913898  | 21.881117 |
| 6 | -2.675514 | 3.193668  | 21.881117 |
| 6 | -4.103555 | 0.720229  | 21.881117 |
| 6 | -4.103555 | -0.720229 | 21.881117 |
| 6 | -2.675514 | -3.193668 | 21.881117 |
| 6 | -1.428041 | -3.913898 | 21.881117 |
| 6 | 3.194611  | -2.678383 | 20.626760 |
| 6 | 3.916853  | -1.427423 | 20.626760 |
| 6 | 3.916853  | 1.427423  | 20.626760 |
| 6 | 3.194611  | 2.678383  | 20.626760 |
| 6 | 0.722242  | 4.105806  | 20.626760 |
| 6 | -0.722242 | 4.105806  | 20.626760 |
| 6 | -3.194611 | 2.678383  | 20.626760 |
| 6 | -3.916853 | 1.427423  | 20.626760 |
| 6 | -3.916853 | -1.427423 | 20.626760 |
| 6 | -3.194611 | -2.678383 | 20.626760 |
| 6 | -0.722242 | -4.105806 | 20.626760 |
| 6 | 0.722242  | -4.105806 | 20.626760 |
| 6 | 4.109303  | -0.725031 | 19.379842 |
| 6 | 4.109303  | 0.725031  | 19.379842 |
| 6 | 2.682547  | 3.196245  | 19.379842 |
| 6 | 1.426756  | 3.921276  | 19.379842 |
| 6 | -1.426756 | 3.921276  | 19.379842 |
| 6 | -2.682547 | 3.196245  | 19.379842 |
| 6 | -4.109303 | 0.725031  | 19.379842 |
| 6 | -4.109303 | -0.725031 | 19.379842 |
| 6 | -2.682547 | -3.196245 | 19.379842 |
| 6 | -1.426756 | -3.921276 | 19.379842 |
| 6 | 1.426756  | -3.921276 | 19.379842 |
| 6 | 2.682547  | -3.196245 | 19.379842 |
| 6 | 3.915007  | 1.427846  | 18.130593 |
| 6 | 3.194054  | 2.676572  | 18.130593 |
| 6 | 0.720953  | 4.104418  | 18.130593 |
| 6 | -0.720953 | 4.104418  | 18.130593 |
| 6 | -3.194054 | 2.676572  | 18.130593 |
| 6 | -3.915007 | 1.427846  | 18.130593 |
| 6 | -3.915007 | -1.427846 | 18.130593 |
| 6 | -3.194054 | -2.676572 | 18.130593 |
| 6 | -0.720953 | -4.104418 | 18.130593 |
| 6 | 0.720953  | -4.104418 | 18.130593 |
| 6 | 3.194054  | -2.676572 | 18.130593 |
| 6 | 3.915007  | -1.427846 | 18.130593 |
| 6 | 2.677597  | 3.194381  | 16.876343 |
| 6 | 1.427617  | 3.916058  | 16.876343 |
| 6 | -1.427617 | 3.916058  | 16.876343 |
| 6 | -2.677597 | 3.194381  | 16.876343 |
| 6 | -4.105214 | 0.721677  | 16.876343 |
| 6 | -4.105214 | -0.721677 | 16.876343 |
| 6 | -2.677597 | -3.194381 | 16.876343 |
| 6 | -1.427617 | -3.916058 | 16.876343 |
| 6 | 1.427617  | -3.916058 | 16.876343 |
| 6 | 2.677597  | -3.194381 | 16.876343 |
| 6 | 4.105214  | -0.721677 | 16.876343 |
| 6 | 4.105214  | 0.721677  | 16.876343 |
| 6 | 0.724911  | 4.109184  | 15.628334 |

|   |           |           |           |
|---|-----------|-----------|-----------|
| 6 | -0.724911 | 4.109184  | 15.628334 |
| 6 | -3.196202 | 2.682384  | 15.628334 |
| 6 | -3.921114 | 1.426801  | 15.628334 |
| 6 | -3.921114 | -1.426801 | 15.628334 |
| 6 | -3.196202 | -2.682384 | 15.628334 |
| 6 | -0.724911 | -4.109184 | 15.628334 |
| 6 | 0.724911  | -4.109184 | 15.628334 |
| 6 | 3.196202  | -2.682384 | 15.628334 |
| 6 | 3.921114  | -1.426801 | 15.628334 |
| 6 | 3.921114  | 1.426801  | 15.628334 |
| 6 | 3.196202  | 2.682384  | 15.628334 |
| 6 | -1.427683 | 3.915974  | 14.379969 |
| 6 | -2.677491 | 3.194396  | 14.379969 |
| 6 | -4.105174 | 0.721577  | 14.379969 |
| 6 | -4.105174 | -0.721577 | 14.379969 |
| 6 | -2.677491 | -3.194396 | 14.379969 |
| 6 | -1.427683 | -3.915974 | 14.379969 |
| 6 | 1.427683  | -3.915974 | 14.379969 |
| 6 | 2.677491  | -3.194396 | 14.379969 |
| 6 | 4.105174  | -0.721577 | 14.379969 |
| 6 | 4.105174  | 0.721577  | 14.379969 |
| 6 | 2.677491  | 3.194396  | 14.379969 |
| 6 | 1.427683  | 3.915974  | 14.379969 |
| 6 | -3.194177 | 2.676989  | 13.125979 |
| 6 | -3.915429 | 1.427744  | 13.125979 |
| 6 | -3.915429 | -1.427744 | 13.125979 |
| 6 | -3.194177 | -2.676989 | 13.125979 |
| 6 | -0.721252 | -4.104733 | 13.125979 |
| 6 | 0.721252  | -4.104733 | 13.125979 |
| 6 | 3.194177  | -2.676989 | 13.125979 |
| 6 | 3.915429  | -1.427744 | 13.125979 |
| 6 | 3.915429  | 1.427744  | 13.125979 |
| 6 | 3.194177  | 2.676989  | 13.125979 |
| 6 | 0.721252  | 4.104733  | 13.125979 |
| 6 | -0.721252 | 4.104733  | 13.125979 |
| 6 | -4.108941 | 0.724712  | 11.876968 |
| 6 | -4.108941 | -0.724712 | 11.876968 |
| 6 | -2.682090 | -3.196091 | 11.876968 |
| 6 | -1.426852 | -3.920803 | 11.876968 |
| 6 | 1.426852  | -3.920803 | 11.876968 |
| 6 | 2.682090  | -3.196091 | 11.876968 |
| 6 | 4.108941  | -0.724712 | 11.876968 |
| 6 | 4.108941  | 0.724712  | 11.876968 |
| 6 | 2.682090  | 3.196091  | 11.876968 |
| 6 | 1.426852  | 3.920803  | 11.876968 |
| 6 | -1.426852 | 3.920803  | 11.876968 |
| 6 | -2.682090 | 3.196091  | 11.876968 |
| 6 | -3.916858 | -1.427526 | 10.629253 |
| 6 | -3.194703 | -2.678336 | 10.629253 |
| 6 | -0.722155 | -4.105862 | 10.629253 |
| 6 | 0.722155  | -4.105862 | 10.629253 |
| 6 | 3.194703  | -2.678336 | 10.629253 |
| 6 | 3.916858  | -1.427526 | 10.629253 |
| 6 | 3.916858  | 1.427526  | 10.629253 |
| 6 | 3.194703  | 2.678336  | 10.629253 |
| 6 | 0.722155  | 4.105862  | 10.629253 |
| 6 | -0.722155 | 4.105862  | 10.629253 |
| 6 | -3.194703 | 2.678336  | 10.629253 |
| 6 | -3.916858 | 1.427526  | 10.629253 |
| 6 | -2.676540 | -3.194024 | 9.375663  |
| 6 | -1.427836 | -3.914964 | 9.375663  |
| 6 | 1.427836  | -3.914964 | 9.375663  |
| 6 | 2.676540  | -3.194024 | 9.375663  |
| 6 | 4.104376  | -0.720940 | 9.375663  |
| 6 | 4.104376  | 0.720940  | 9.375663  |
| 6 | 2.676540  | 3.194024  | 9.375663  |
| 6 | 1.427836  | 3.914964  | 9.375663  |
| 6 | -1.427836 | 3.914964  | 9.375663  |
| 6 | -2.676540 | 3.194024  | 9.375663  |
| 6 | -4.104376 | 0.720940  | 9.375663  |

|   |           |           |          |
|---|-----------|-----------|----------|
| 6 | -4.104376 | -0.720940 | 9.375663 |
| 6 | -0.724437 | -4.108609 | 8.125705 |
| 6 | 0.724437  | -4.108609 | 8.125705 |
| 6 | 3.195941  | -2.681685 | 8.125705 |
| 6 | 3.920378  | -1.426924 | 8.125705 |
| 6 | 3.920378  | 1.426924  | 8.125705 |
| 6 | 3.195941  | 2.681685  | 8.125705 |
| 6 | 0.724437  | 4.108609  | 8.125705 |
| 6 | -0.724437 | 4.108609  | 8.125705 |
| 6 | -3.195941 | 2.681685  | 8.125705 |
| 6 | -3.920378 | 1.426924  | 8.125705 |
| 6 | -3.920378 | -1.426924 | 8.125705 |
| 6 | -3.195941 | -2.681685 | 8.125705 |
| 6 | 1.427379  | -3.917693 | 6.878447 |
| 6 | 2.679133  | -3.194993 | 6.878447 |
| 6 | 4.106511  | -0.722701 | 6.878447 |
| 6 | 4.106511  | 0.722701  | 6.878447 |
| 6 | 2.679133  | 3.194993  | 6.878447 |
| 6 | 1.427379  | 3.917693  | 6.878447 |
| 6 | -1.427379 | 3.917693  | 6.878447 |
| 6 | -2.679133 | 3.194993  | 6.878447 |
| 6 | -4.106511 | 0.722701  | 6.878447 |
| 6 | -4.106511 | -0.722701 | 6.878447 |
| 6 | -2.679133 | -3.194993 | 6.878447 |
| 6 | -1.427379 | -3.917693 | 6.878447 |
| 6 | 3.193921  | -2.676239 | 5.625382 |
| 6 | 3.914652  | -1.427897 | 5.625382 |
| 6 | 3.914652  | 1.427897  | 5.625382 |
| 6 | 3.193921  | 2.676239  | 5.625382 |
| 6 | 0.720731  | 4.104136  | 5.625382 |
| 6 | -0.720731 | 4.104136  | 5.625382 |
| 6 | -3.193921 | 2.676239  | 5.625382 |
| 6 | -3.914652 | 1.427897  | 5.625382 |
| 6 | -3.914652 | -1.427897 | 5.625382 |
| 6 | -3.193921 | -2.676239 | 5.625382 |
| 6 | -0.720731 | -4.104136 | 5.625382 |
| 6 | 0.720731  | -4.104136 | 5.625382 |
| 6 | 4.108190  | -0.724090 | 4.374531 |
| 6 | 4.108190  | 0.724090  | 4.374531 |
| 6 | 2.681175  | 3.195752  | 4.374531 |
| 6 | 1.427015  | 3.919841  | 4.374531 |
| 6 | -1.427015 | 3.919841  | 4.374531 |
| 6 | -2.681175 | 3.195752  | 4.374531 |
| 6 | -4.108190 | 0.724090  | 4.374531 |
| 6 | -4.108190 | -0.724090 | 4.374531 |
| 6 | -2.681175 | -3.195752 | 4.374531 |
| 6 | -1.427015 | -3.919841 | 4.374531 |
| 6 | 1.427015  | -3.919841 | 4.374531 |
| 6 | 2.681175  | -3.195752 | 4.374531 |
| 6 | 3.918470  | 1.427238  | 3.127546 |
| 6 | 3.195260  | 2.679876  | 3.127546 |
| 6 | 0.723211  | 4.107114  | 3.127546 |
| 6 | -0.723211 | 4.107114  | 3.127546 |
| 6 | -3.195260 | 2.679876  | 3.127546 |
| 6 | -3.918470 | 1.427238  | 3.127546 |
| 6 | -3.918470 | -1.427238 | 3.127546 |
| 6 | -3.195260 | -2.679876 | 3.127546 |
| 6 | -0.723211 | -4.107114 | 3.127546 |
| 6 | 0.723211  | -4.107114 | 3.127546 |
| 6 | 3.195260  | -2.679876 | 3.127546 |
| 6 | 3.918470  | -1.427238 | 3.127546 |
| 6 | 2.676086  | 3.193866  | 1.875122 |
| 6 | 1.427926  | 3.914492  | 1.875122 |
| 6 | -1.427926 | 3.914492  | 1.875122 |
| 6 | -2.676086 | 3.193866  | 1.875122 |
| 6 | -4.104012 | 0.720626  | 1.875122 |
| 6 | -4.104012 | -0.720626 | 1.875122 |
| 6 | -2.676086 | -3.193866 | 1.875122 |
| 6 | -1.427926 | -3.914492 | 1.875122 |
| 6 | 1.427926  | -3.914492 | 1.875122 |

|   |           |           |           |
|---|-----------|-----------|-----------|
| 6 | 2.676086  | -3.193866 | 1.875122  |
| 6 | 4.104012  | -0.720626 | 1.875122  |
| 6 | 4.104012  | 0.720626  | 1.875122  |
| 6 | 0.723679  | 4.107703  | 0.623445  |
| 6 | -0.723679 | 4.107703  | 0.623445  |
| 6 | -3.195536 | 2.680576  | 0.623445  |
| 6 | -3.919215 | 1.427127  | 0.623445  |
| 6 | -3.919215 | -1.427127 | 0.623445  |
| 6 | -3.195536 | -2.680576 | 0.623445  |
| 6 | -0.723679 | -4.107703 | 0.623445  |
| 6 | 0.723679  | -4.107703 | 0.623445  |
| 6 | 3.195536  | -2.680576 | 0.623445  |
| 6 | 3.919215  | -1.427127 | 0.623445  |
| 6 | 3.919215  | 1.427127  | 0.623445  |
| 6 | 3.195536  | 2.680576  | 0.623445  |
| 6 | -1.427127 | 3.919215  | -0.623445 |
| 6 | -2.680576 | 3.195536  | -0.623445 |
| 6 | -4.107703 | 0.723679  | -0.623445 |
| 6 | -4.107703 | -0.723679 | -0.623445 |
| 6 | -2.680576 | -3.195536 | -0.623445 |
| 6 | -1.427127 | -3.919215 | -0.623445 |
| 6 | 1.427127  | -3.919215 | -0.623445 |
| 6 | 2.680576  | -3.195536 | -0.623445 |
| 6 | 4.107703  | -0.723679 | -0.623445 |
| 6 | 4.107703  | 0.723679  | -0.623445 |
| 6 | 2.680576  | 3.195536  | -0.623445 |
| 6 | 1.427127  | 3.919215  | -0.623445 |
| 6 | -3.193866 | 2.676086  | -1.875122 |
| 6 | -3.914492 | 1.427926  | -1.875122 |
| 6 | -3.914492 | -1.427926 | -1.875122 |
| 6 | -3.193866 | -2.676086 | -1.875122 |
| 6 | -0.720626 | -4.104012 | -1.875122 |
| 6 | 0.720626  | -4.104012 | -1.875122 |
| 6 | 3.193866  | -2.676086 | -1.875122 |
| 6 | 3.914492  | -1.427926 | -1.875122 |
| 6 | 3.914492  | 1.427926  | -1.875122 |
| 6 | 3.193866  | 2.676086  | -1.875122 |
| 6 | 0.720626  | 4.104012  | -1.875122 |
| 6 | -0.720626 | 4.104012  | -1.875122 |
| 6 | -4.107114 | 0.723211  | -3.127546 |
| 6 | -4.107114 | -0.723211 | -3.127546 |
| 6 | -2.679876 | -3.195260 | -3.127546 |
| 6 | -1.427238 | -3.918470 | -3.127546 |
| 6 | 1.427238  | -3.918470 | -3.127546 |
| 6 | 2.679876  | -3.195260 | -3.127546 |
| 6 | 4.107114  | -0.723211 | -3.127546 |
| 6 | 4.107114  | 0.723211  | -3.127546 |
| 6 | 2.679876  | 3.195260  | -3.127546 |
| 6 | 1.427238  | 3.918470  | -3.127546 |
| 6 | -1.427238 | 3.918470  | -3.127546 |
| 6 | -2.679876 | 3.195260  | -3.127546 |
| 6 | -3.919841 | -1.427015 | -4.374531 |
| 6 | -3.195752 | -2.681175 | -4.374531 |
| 6 | -0.724090 | -4.108190 | -4.374531 |
| 6 | 0.724090  | -4.108190 | -4.374531 |
| 6 | 3.195752  | -2.681175 | -4.374531 |
| 6 | 3.919841  | -1.427015 | -4.374531 |
| 6 | 3.919841  | 1.427015  | -4.374531 |
| 6 | 3.195752  | 2.681175  | -4.374531 |
| 6 | 0.724090  | 4.108190  | -4.374531 |
| 6 | -0.724090 | 4.108190  | -4.374531 |
| 6 | -3.195752 | 2.681175  | -4.374531 |
| 6 | -3.919841 | 1.427015  | -4.374531 |
| 6 | -2.676239 | -3.193921 | -5.625382 |
| 6 | -1.427897 | -3.914652 | -5.625382 |
| 6 | 1.427897  | -3.914652 | -5.625382 |
| 6 | 2.676239  | -3.193921 | -5.625382 |
| 6 | 4.104136  | -0.720731 | -5.625382 |
| 6 | 4.104136  | 0.720731  | -5.625382 |
| 6 | 2.676239  | 3.193921  | -5.625382 |



|   |           |           |            |
|---|-----------|-----------|------------|
| 6 | 1.427897  | 3.914652  | -5.625382  |
| 6 | -1.427897 | 3.914652  | -5.625382  |
| 6 | -2.676239 | 3.193921  | -5.625382  |
| 6 | -4.104136 | 0.720731  | -5.625382  |
| 6 | -4.104136 | -0.720731 | -5.625382  |
| 6 | -0.722701 | -4.106511 | -6.878447  |
| 6 | 0.722701  | -4.106511 | -6.878447  |
| 6 | 3.194993  | -2.679133 | -6.878447  |
| 6 | 3.917693  | -1.427379 | -6.878447  |
| 6 | 3.917693  | 1.427379  | -6.878447  |
| 6 | 3.194993  | 2.679133  | -6.878447  |
| 6 | 0.722701  | 4.106511  | -6.878447  |
| 6 | -0.722701 | 4.106511  | -6.878447  |
| 6 | -3.194993 | 2.679133  | -6.878447  |
| 6 | -3.917693 | 1.427379  | -6.878447  |
| 6 | -3.917693 | -1.427379 | -6.878447  |
| 6 | -3.194993 | -2.679133 | -6.878447  |
| 6 | 1.426924  | -3.920378 | -8.125705  |
| 6 | 2.681685  | -3.195941 | -8.125705  |
| 6 | 4.108609  | -0.724437 | -8.125705  |
| 6 | 4.108609  | 0.724437  | -8.125705  |
| 6 | 2.681685  | 3.195941  | -8.125705  |
| 6 | 1.426924  | 3.920378  | -8.125705  |
| 6 | -1.426924 | 3.920378  | -8.125705  |
| 6 | -2.681685 | 3.195941  | -8.125705  |
| 6 | -4.108609 | 0.724437  | -8.125705  |
| 6 | -4.108609 | -0.724437 | -8.125705  |
| 6 | -2.681685 | -3.195941 | -8.125705  |
| 6 | -1.426924 | -3.920378 | -8.125705  |
| 6 | 3.194024  | -2.676540 | -9.375663  |
| 6 | 3.914964  | -1.427836 | -9.375663  |
| 6 | 3.914964  | 1.427836  | -9.375663  |
| 6 | 3.194024  | 2.676540  | -9.375663  |
| 6 | 0.720940  | 4.104376  | -9.375663  |
| 6 | -0.720940 | 4.104376  | -9.375663  |
| 6 | -3.194024 | 2.676540  | -9.375663  |
| 6 | -3.914964 | 1.427836  | -9.375663  |
| 6 | -3.914964 | -1.427836 | -9.375663  |
| 6 | -3.194024 | -2.676540 | -9.375663  |
| 6 | -0.720940 | -4.104376 | -9.375663  |
| 6 | 0.720940  | -4.104376 | -9.375663  |
| 6 | 4.105862  | -0.722155 | -10.629253 |
| 6 | 4.105862  | 0.722155  | -10.629253 |
| 6 | 2.678336  | 3.194703  | -10.629253 |
| 6 | 1.427526  | 3.916858  | -10.629253 |
| 6 | -1.427526 | 3.916858  | -10.629253 |
| 6 | -2.678336 | 3.194703  | -10.629253 |
| 6 | -4.105862 | 0.722155  | -10.629253 |
| 6 | -4.105862 | -0.722155 | -10.629253 |
| 6 | -2.678336 | -3.194703 | -10.629253 |
| 6 | -1.427526 | -3.916858 | -10.629253 |
| 6 | 1.427526  | -3.916858 | -10.629253 |
| 6 | 2.678336  | -3.194703 | -10.629253 |
| 6 | 3.920803  | 1.426852  | -11.876968 |
| 6 | 3.196091  | 2.682090  | -11.876968 |
| 6 | 0.724712  | 4.108941  | -11.876968 |
| 6 | -0.724712 | 4.108941  | -11.876968 |
| 6 | -3.196091 | 2.682090  | -11.876968 |
| 6 | -3.920803 | 1.426852  | -11.876968 |
| 6 | -3.920803 | -1.426852 | -11.876968 |
| 6 | -3.196091 | -2.682090 | -11.876968 |
| 6 | -0.724712 | -4.108941 | -11.876968 |
| 6 | 0.724712  | -4.108941 | -11.876968 |
| 6 | 3.196091  | -2.682090 | -11.876968 |
| 6 | 3.920803  | -1.426852 | -11.876968 |
| 6 | 2.676989  | 3.194177  | -13.125979 |
| 6 | 1.427744  | 3.915429  | -13.125979 |
| 6 | -1.427744 | 3.915429  | -13.125979 |
| 6 | -2.676989 | 3.194177  | -13.125979 |
| 6 | -4.104733 | 0.721252  | -13.125979 |

|   |           |           |            |
|---|-----------|-----------|------------|
| 6 | -4.104733 | -0.721252 | -13.125979 |
| 6 | -2.676989 | -3.194177 | -13.125979 |
| 6 | -1.427744 | -3.915429 | -13.125979 |
| 6 | 1.427744  | -3.915429 | -13.125979 |
| 6 | 2.676989  | -3.194177 | -13.125979 |
| 6 | 4.104733  | -0.721252 | -13.125979 |
| 6 | 4.104733  | 0.721252  | -13.125979 |
| 6 | 0.721577  | 4.105174  | -14.379969 |
| 6 | -0.721577 | 4.105174  | -14.379969 |
| 6 | -3.194396 | 2.677491  | -14.379969 |
| 6 | -3.915974 | 1.427683  | -14.379969 |
| 6 | -3.915974 | -1.427683 | -14.379969 |
| 6 | -3.194396 | -2.677491 | -14.379969 |
| 6 | -0.721577 | -4.105174 | -14.379969 |
| 6 | 0.721577  | -4.105174 | -14.379969 |
| 6 | 3.194396  | -2.677491 | -14.379969 |
| 6 | 3.915974  | -1.427683 | -14.379969 |
| 6 | 3.915974  | 1.427683  | -14.379969 |
| 6 | 3.194396  | 2.677491  | -14.379969 |
| 6 | -1.426801 | 3.921114  | -15.628334 |
| 6 | -2.682384 | 3.196202  | -15.628334 |
| 6 | -4.109184 | 0.724911  | -15.628334 |
| 6 | -4.109184 | -0.724911 | -15.628334 |
| 6 | -2.682384 | -3.196202 | -15.628334 |
| 6 | -1.426801 | -3.921114 | -15.628334 |
| 6 | 1.426801  | -3.921114 | -15.628334 |
| 6 | 2.682384  | -3.196202 | -15.628334 |
| 6 | 4.109184  | -0.724911 | -15.628334 |
| 6 | 4.109184  | 0.724911  | -15.628334 |
| 6 | 2.682384  | 3.196202  | -15.628334 |
| 6 | 1.426801  | 3.921114  | -15.628334 |
| 6 | -3.194381 | 2.677597  | -16.876343 |
| 6 | -3.916058 | 1.427617  | -16.876343 |
| 6 | -3.916058 | -1.427617 | -16.876343 |
| 6 | -3.194381 | -2.677597 | -16.876343 |
| 6 | -0.721677 | -4.105214 | -16.876343 |
| 6 | 0.721677  | -4.105214 | -16.876343 |
| 6 | 3.194381  | -2.677597 | -16.876343 |
| 6 | 3.916058  | -1.427617 | -16.876343 |
| 6 | 3.916058  | 1.427617  | -16.876343 |
| 6 | 3.194381  | 2.677597  | -16.876343 |
| 6 | 0.721677  | 4.105214  | -16.876343 |
| 6 | -0.721677 | 4.105214  | -16.876343 |
| 6 | -4.104418 | 0.720953  | -18.130593 |
| 6 | -4.104418 | -0.720953 | -18.130593 |
| 6 | -2.676572 | -3.194054 | -18.130593 |
| 6 | -1.427846 | -3.915007 | -18.130593 |
| 6 | 1.427846  | -3.915007 | -18.130593 |
| 6 | 2.676572  | -3.194054 | -18.130593 |
| 6 | 4.104418  | -0.720953 | -18.130593 |
| 6 | 4.104418  | 0.720953  | -18.130593 |
| 6 | 2.676572  | 3.194054  | -18.130593 |
| 6 | 1.427846  | 3.915007  | -18.130593 |
| 6 | -1.427846 | 3.915007  | -18.130593 |
| 6 | -2.676572 | 3.194054  | -18.130593 |
| 6 | -3.921276 | -1.426756 | -19.379842 |
| 6 | -3.196245 | -2.682547 | -19.379842 |
| 6 | -0.725031 | -4.109303 | -19.379842 |
| 6 | 0.725031  | -4.109303 | -19.379842 |
| 6 | 3.196245  | -2.682547 | -19.379842 |
| 6 | 3.921276  | -1.426756 | -19.379842 |
| 6 | 3.921276  | 1.426756  | -19.379842 |
| 6 | 3.196245  | 2.682547  | -19.379842 |
| 6 | 0.725031  | 4.109303  | -19.379842 |
| 6 | -0.725031 | 4.109303  | -19.379842 |
| 6 | -3.196245 | 2.682547  | -19.379842 |
| 6 | -3.921276 | 1.426756  | -19.379842 |
| 6 | -2.678383 | -3.194611 | -20.626760 |
| 6 | -1.427423 | -3.916853 | -20.626760 |
| 6 | 1.427423  | -3.916853 | -20.626760 |

|   |           |           |            |
|---|-----------|-----------|------------|
| 6 | 2.678383  | -3.194611 | -20.626760 |
| 6 | 4.105806  | -0.722242 | -20.626760 |
| 6 | 4.105806  | 0.722242  | -20.626760 |
| 6 | 2.678383  | 3.194611  | -20.626760 |
| 6 | 1.427423  | 3.916853  | -20.626760 |
| 6 | -1.427423 | 3.916853  | -20.626760 |
| 6 | -2.678383 | 3.194611  | -20.626760 |
| 6 | -4.105806 | 0.722242  | -20.626760 |
| 6 | -4.105806 | -0.722242 | -20.626760 |
| 6 | -0.720229 | -4.103555 | -21.881117 |
| 6 | 0.720229  | -4.103555 | -21.881117 |
| 6 | 3.193668  | -2.675514 | -21.881117 |
| 6 | 3.913898  | -1.428041 | -21.881117 |
| 6 | 3.913898  | 1.428041  | -21.881117 |
| 6 | 3.193668  | 2.675514  | -21.881117 |
| 6 | 0.720229  | 4.103555  | -21.881117 |
| 6 | -0.720229 | 4.103555  | -21.881117 |
| 6 | -3.193668 | 2.675514  | -21.881117 |
| 6 | -3.913898 | 1.428041  | -21.881117 |
| 6 | -3.913898 | -1.428041 | -21.881117 |
| 6 | -3.193668 | -2.675514 | -21.881117 |
| 6 | 1.426810  | -3.921576 | -23.131631 |
| 6 | 2.682780  | -3.196442 | -23.131631 |
| 6 | 4.109590  | -0.725135 | -23.131631 |
| 6 | 4.109590  | 0.725135  | -23.131631 |
| 6 | 2.682780  | 3.196442  | -23.131631 |
| 6 | 1.426810  | 3.921576  | -23.131631 |
| 6 | -1.426810 | 3.921576  | -23.131631 |
| 6 | -2.682780 | 3.196442  | -23.131631 |
| 6 | -4.109590 | 0.725135  | -23.131631 |
| 6 | -4.109590 | -0.725135 | -23.131631 |
| 6 | -2.682780 | -3.196442 | -23.131631 |
| 6 | -1.426810 | -3.921576 | -23.131631 |
| 6 | 3.195486  | -2.679937 | -24.377192 |
| 6 | 3.918637  | -1.427403 | -24.377192 |
| 6 | 3.918637  | 1.427403  | -24.377192 |
| 6 | 3.195486  | 2.679937  | -24.377192 |
| 6 | 0.723151  | 4.107340  | -24.377192 |
| 6 | -0.723151 | 4.107340  | -24.377192 |
| 6 | -3.195486 | 2.679937  | -24.377192 |
| 6 | -3.918637 | 1.427403  | -24.377192 |
| 6 | -3.918637 | -1.427403 | -24.377192 |
| 6 | -3.195486 | -2.679937 | -24.377192 |
| 6 | -0.723151 | -4.107340 | -24.377192 |
| 6 | 0.723151  | -4.107340 | -24.377192 |
| 6 | 4.103005  | -0.719203 | -25.631320 |
| 6 | 4.103005  | 0.719203  | -25.631320 |
| 6 | 2.674351  | 3.193705  | -25.631320 |
| 6 | 1.428654  | 3.912909  | -25.631320 |
| 6 | -1.428654 | 3.912909  | -25.631320 |
| 6 | -2.674351 | 3.193705  | -25.631320 |
| 6 | -4.103005 | 0.719203  | -25.631320 |
| 6 | -4.103005 | -0.719203 | -25.631320 |
| 6 | -2.674351 | -3.193705 | -25.631320 |
| 6 | -1.428654 | -3.912909 | -25.631320 |
| 6 | 1.428654  | -3.912909 | -25.631320 |
| 6 | 2.674351  | -3.193705 | -25.631320 |
| 6 | 3.920593  | 1.426439  | -26.883921 |
| 6 | 3.195629  | 2.682113  | -26.883921 |
| 6 | 0.724964  | 4.108553  | -26.883921 |
| 6 | -0.724964 | 4.108553  | -26.883921 |
| 6 | -3.195629 | 2.682113  | -26.883921 |
| 6 | -3.920593 | 1.426439  | -26.883921 |
| 6 | -3.920593 | -1.426439 | -26.883921 |
| 6 | -3.195629 | -2.682113 | -26.883921 |
| 6 | -0.724964 | -4.108553 | -26.883921 |
| 6 | 0.724964  | -4.108553 | -26.883921 |
| 6 | 3.195629  | -2.682113 | -26.883921 |
| 6 | 3.920593  | -1.426439 | -26.883921 |
| 6 | 2.678410  | 3.191511  | -28.127324 |

|   |           |           |            |
|---|-----------|-----------|------------|
| 6 | 1.424725  | 3.915326  | -28.127324 |
| 6 | -1.424725 | 3.915326  | -28.127324 |
| 6 | -2.678410 | 3.191511  | -28.127324 |
| 6 | -4.103134 | 0.723816  | -28.127324 |
| 6 | -4.103134 | -0.723816 | -28.127324 |
| 6 | -2.678410 | -3.191511 | -28.127324 |
| 6 | -1.424725 | -3.915326 | -28.127324 |
| 6 | 1.424725  | -3.915326 | -28.127324 |
| 6 | 2.678410  | -3.191511 | -28.127324 |
| 6 | 4.103134  | -0.723816 | -28.127324 |
| 6 | 4.103134  | 0.723816  | -28.127324 |
| 6 | 0.715217  | 4.087164  | -29.381091 |
| 6 | -0.715217 | 4.087164  | -29.381091 |
| 6 | -3.181980 | 2.662978  | -29.381091 |
| 6 | -3.897196 | 1.424186  | -29.381091 |
| 6 | -3.897196 | -1.424186 | -29.381091 |
| 6 | -3.181980 | -2.662978 | -29.381091 |
| 6 | -0.715217 | -4.087164 | -29.381091 |
| 6 | 0.715217  | -4.087164 | -29.381091 |
| 6 | 3.181980  | -2.662978 | -29.381091 |
| 6 | 3.897196  | -1.424186 | -29.381091 |
| 6 | 3.897196  | 1.424186  | -29.381091 |
| 6 | 3.181980  | 2.662978  | -29.381091 |
| 6 | -1.420217 | 3.912123  | -30.642216 |
| 6 | -2.677889 | 3.186005  | -30.642216 |
| 6 | -4.098106 | 0.726118  | -30.642216 |
| 6 | -4.098106 | -0.726118 | -30.642216 |
| 6 | -2.677889 | -3.186005 | -30.642216 |
| 6 | -1.420217 | -3.912123 | -30.642216 |
| 6 | 1.420217  | -3.912123 | -30.642216 |
| 6 | 2.677889  | -3.186005 | -30.642216 |
| 6 | 4.098106  | -0.726118 | -30.642216 |
| 6 | 4.098106  | 0.726118  | -30.642216 |
| 6 | 2.677889  | 3.186005  | -30.642216 |
| 6 | 1.420217  | 3.912123  | -30.642216 |
| 6 | -3.224064 | 2.709718  | -31.882348 |
| 6 | -3.958717 | 1.437262  | -31.882348 |
| 6 | -3.958717 | -1.437262 | -31.882348 |
| 6 | -3.224064 | -2.709718 | -31.882348 |
| 6 | -0.734653 | -4.146980 | -31.882348 |
| 6 | 0.734653  | -4.146980 | -31.882348 |
| 6 | 3.224064  | -2.709718 | -31.882348 |
| 6 | 3.958717  | -1.437262 | -31.882348 |
| 6 | 3.958717  | 1.437262  | -31.882348 |
| 6 | 3.224064  | 2.709718  | -31.882348 |
| 6 | 0.734653  | 4.146980  | -31.882348 |
| 6 | -0.734653 | 4.146980  | -31.882348 |
| 6 | -4.211641 | 0.691809  | -33.098182 |
| 6 | -4.211641 | -0.691809 | -33.098182 |
| 6 | -2.704945 | -3.301484 | -33.098182 |
| 6 | -1.506696 | -3.993293 | -33.098182 |
| 6 | 1.506696  | -3.993293 | -33.098182 |
| 6 | 2.704945  | -3.301484 | -33.098182 |
| 6 | 4.211641  | -0.691809 | -33.098182 |
| 6 | 4.211641  | 0.691809  | -33.098182 |
| 6 | 2.704945  | 3.301484  | -33.098182 |
| 6 | 1.506696  | 3.993293  | -33.098182 |
| 6 | -1.506696 | 3.993293  | -33.098182 |
| 6 | -2.704945 | 3.301484  | -33.098182 |

Nanotube (6,6) u26v6s  
B3LYP/STO-3G Energy: -23958.082682

|   |             |            |              |
|---|-------------|------------|--------------|
| C | -3.46715908 | 2.48757788 | -32.46648357 |
| C | -2.48757788 | 3.46715908 | -32.46648357 |
| C | 0.42072610  | 4.24643678 | -32.46648357 |
| C | 1.75885890  | 3.88788518 | -32.46648357 |
| C | 3.88788518  | 1.75885890 | -32.46648357 |

|   |             |             |              |
|---|-------------|-------------|--------------|
| C | 4.24643678  | 0.42072610  | -32.46648357 |
| C | 3.46715908  | -2.48757788 | -32.46648357 |
| C | 2.48757788  | -3.46715908 | -32.46648357 |
| C | -0.42072610 | -4.24643678 | -32.46648357 |
| C | -1.75885890 | -3.88788518 | -32.46648357 |
| C | -3.88788518 | -1.75885890 | -32.46648357 |
| C | -4.24643678 | -0.42072610 | -32.46648357 |
| C | -1.78443955 | 3.81660489  | -31.25193718 |
| C | -0.36293246 | 4.19749657  | -31.25193718 |
| C | 2.41305702  | 3.45367243  | -31.25193718 |
| C | 3.45367243  | 2.41305702  | -31.25193718 |
| C | 4.19749657  | -0.36293246 | -31.25193718 |
| C | 3.81660489  | -1.78443955 | -31.25193718 |
| C | 1.78443955  | -3.81660489 | -31.25193718 |
| C | 0.36293246  | -4.19749657 | -31.25193718 |
| C | -2.41305702 | -3.45367243 | -31.25193718 |
| C | -3.45367243 | -2.41305702 | -31.25193718 |
| C | -4.19749657 | 0.36293246  | -31.25193718 |
| C | -3.81660489 | 1.78443955  | -31.25193718 |
| C | 0.35964365  | 4.14594190  | -30.01180084 |
| C | 1.76151041  | 3.77031283  | -30.01180084 |
| C | 3.77031283  | 1.76151041  | -30.01180084 |
| C | 4.14594190  | 0.35964365  | -30.01180084 |
| C | 3.41066918  | -2.38443149 | -30.01180084 |
| C | 2.38443149  | -3.41066918 | -30.01180084 |
| C | -0.35964365 | -4.14594190 | -30.01180084 |
| C | -1.76151041 | -3.77031283 | -30.01180084 |
| C | -3.77031283 | -1.76151041 | -30.01180084 |
| C | -4.14594190 | -0.35964365 | -30.01180084 |
| C | -3.41066918 | 2.38443149  | -30.01180084 |
| C | -2.38443149 | 3.41066918  | -30.01180084 |
| C | 2.38462073  | 3.39677793  | -28.74977548 |
| C | 3.39677793  | 2.38462073  | -28.74977548 |
| C | 4.13400634  | -0.36675316 | -28.74977548 |
| C | 3.76353109  | -1.74938561 | -28.74977548 |
| C | 1.74938561  | -3.76353109 | -28.74977548 |
| C | 0.36675316  | -4.13400634 | -28.74977548 |
| C | -2.38462073 | -3.39677793 | -28.74977548 |
| C | -3.39677793 | -2.38462073 | -28.74977548 |
| C | -4.13400634 | 0.36675316  | -28.74977548 |
| C | -3.76353109 | 1.74938561  | -28.74977548 |
| C | -1.74938561 | 3.76353109  | -28.74977548 |
| C | -0.36675316 | 4.13400634  | -28.74977548 |
| C | 3.77783107  | 1.76293955  | -27.49760599 |
| C | 4.15316745  | 0.36216510  | -27.49760599 |
| C | 3.41566597  | -2.39022790 | -27.49760599 |
| C | 2.39022790  | -3.41566597 | -27.49760599 |
| C | -0.36216510 | -4.15316745 | -27.49760599 |
| C | -1.76293955 | -3.77783107 | -27.49760599 |
| C | -3.77783107 | -1.76293955 | -27.49760599 |
| C | -4.15316745 | -0.36216510 | -27.49760599 |
| C | -3.41566597 | 2.39022790  | -27.49760599 |
| C | -2.39022790 | 3.41566597  | -27.49760599 |
| C | 0.36216510  | 4.15316745  | -27.49760599 |
| C | 1.76293955  | 3.77783107  | -27.49760599 |
| C | 4.15676418  | -0.36351768 | -26.25457788 |
| C | 3.78162222  | -1.76356655 | -26.25457788 |
| C | 1.76356655  | -3.78162222 | -26.25457788 |
| C | 0.36351768  | -4.15676418 | -26.25457788 |
| C | -2.39319763 | -3.41810454 | -26.25457788 |
| C | -3.41810454 | -2.39319763 | -26.25457788 |
| C | -4.15676418 | 0.36351768  | -26.25457788 |
| C | -3.78162222 | 1.76356655  | -26.25457788 |
| C | -1.76356655 | 3.78162222  | -26.25457788 |
| C | -0.36351768 | 4.15676418  | -26.25457788 |
| C | 2.39319763  | 3.41810454  | -26.25457788 |
| C | 3.41810454  | 2.39319763  | -26.25457788 |
| C | 3.41103716  | -2.39342408 | -25.00096362 |
| C | 2.39342408  | -3.41103716 | -25.00096362 |
| C | -0.36724747 | -4.15075688 | -25.00096362 |

|   |             |             |              |
|---|-------------|-------------|--------------|
| C | -1.75733280 | -3.77828463 | -25.00096362 |
| C | -3.77828463 | -1.75733280 | -25.00096362 |
| C | -4.15075688 | -0.36724747 | -25.00096362 |
| C | -3.41103716 | 2.39342408  | -25.00096362 |
| C | -2.39342408 | 3.41103716  | -25.00096362 |
| C | 0.36724747  | 4.15075688  | -25.00096362 |
| C | 1.75733280  | 3.77828463  | -25.00096362 |
| C | 3.77828463  | 1.75733280  | -25.00096362 |
| C | 4.15075688  | 0.36724747  | -25.00096362 |
| C | 1.76356606  | -3.78230793 | -23.74839436 |
| C | 0.36386095  | -4.15735778 | -23.74839436 |
| C | -2.39379172 | -3.41844697 | -23.74839436 |
| C | -3.41844697 | -2.39379172 | -23.74839436 |
| C | -4.15735778 | 0.36386095  | -23.74839436 |
| C | -3.78230793 | 1.76356606  | -23.74839436 |
| C | -1.76356606 | 3.78230793  | -23.74839436 |
| C | -0.36386095 | 4.15735778  | -23.74839436 |
| C | 2.39379172  | 3.41844697  | -23.74839436 |
| C | 3.41844697  | 2.39379172  | -23.74839436 |
| C | 4.15735778  | -0.36386095 | -23.74839436 |
| C | 3.78230793  | -1.76356606 | -23.74839436 |
| C | -0.36365218 | -4.15767390 | -22.50362622 |
| C | -1.76390492 | -3.78247731 | -22.50362622 |
| C | -3.78247731 | -1.76390492 | -22.50362622 |
| C | -4.15767390 | -0.36365218 | -22.50362622 |
| C | -3.41882513 | 2.39376898  | -22.50362622 |
| C | -2.39376898 | 3.41882513  | -22.50362622 |
| C | 0.36365218  | 4.15767390  | -22.50362622 |
| C | 1.76390492  | 3.78247731  | -22.50362622 |
| C | 3.78247731  | 1.76390492  | -22.50362622 |
| C | 4.15767390  | 0.36365218  | -22.50362622 |
| C | 3.41882513  | -2.39376898 | -22.50362622 |
| C | 2.39376898  | -3.41882513 | -22.50362622 |
| C | -2.39322227 | -3.41192721 | -21.25156739 |
| C | -3.41192721 | -2.39322227 | -21.25156739 |
| C | -4.15142678 | 0.36662767  | -21.25156739 |
| C | -3.77855489 | 1.75820451  | -21.25156739 |
| C | -1.75820451 | 3.77855489  | -21.25156739 |
| C | -0.36662767 | 4.15142678  | -21.25156739 |
| C | 2.39322227  | 3.41192721  | -21.25156739 |
| C | 3.41192721  | 2.39322227  | -21.25156739 |
| C | 4.15142678  | -0.36662767 | -21.25156739 |
| C | 3.77855489  | -1.75820451 | -21.25156739 |
| C | 1.75820451  | -3.77855489 | -21.25156739 |
| C | 0.36662767  | -4.15142678 | -21.25156739 |
| C | -3.78137819 | -1.76259869 | -19.99865026 |
| C | -4.15606892 | -0.36423385 | -19.99865026 |
| C | -3.41714434 | 2.39347023  | -19.99865026 |
| C | -2.39347023 | 3.41714434  | -19.99865026 |
| C | 0.36423385  | 4.15606892  | -19.99865026 |
| C | 1.76259869  | 3.78137819  | -19.99865026 |
| C | 3.78137819  | 1.76259869  | -19.99865026 |
| C | 4.15606892  | 0.36423385  | -19.99865026 |
| C | 3.41714434  | -2.39347023 | -19.99865026 |
| C | 2.39347023  | -3.41714434 | -19.99865026 |
| C | -0.36423385 | -4.15606892 | -19.99865026 |
| C | -1.76259869 | -3.78137819 | -19.99865026 |
| C | -4.15744424 | 0.36355259  | -18.75269157 |
| C | -3.78222862 | 1.76387634  | -18.75269157 |
| C | -1.76387634 | 3.78222862  | -18.75269157 |
| C | -0.36355259 | 4.15744424  | -18.75269157 |
| C | 2.39356790  | 3.41867603  | -18.75269157 |
| C | 3.41867603  | 2.39356790  | -18.75269157 |
| C | 4.15744424  | -0.36355259 | -18.75269157 |
| C | 3.78222862  | -1.76387634 | -18.75269157 |
| C | 1.76387634  | -3.78222862 | -18.75269157 |
| C | 0.36355259  | -4.15744424 | -18.75269157 |
| C | -2.39356790 | -3.41867603 | -18.75269157 |
| C | -3.41867603 | -2.39356790 | -18.75269157 |
| C | -3.41212694 | 2.39282042  | -17.50161866 |

|   |             |             |              |
|---|-------------|-------------|--------------|
| C | -2.39282042 | 3.41212694  | -17.50161866 |
| C | 0.36617980  | 4.15139882  | -17.50161866 |
| C | 1.75857840  | 3.77830674  | -17.50161866 |
| C | 3.77830674  | 1.75857840  | -17.50161866 |
| C | 4.15139882  | 0.36617980  | -17.50161866 |
| C | 3.41212694  | -2.39282042 | -17.50161866 |
| C | 2.39282042  | -3.41212694 | -17.50161866 |
| C | -0.36617980 | -4.15139882 | -17.50161866 |
| C | -1.75857840 | -3.77830674 | -17.50161866 |
| C | -3.77830674 | -1.75857840 | -17.50161866 |
| C | -4.15139882 | -0.36617980 | -17.50161866 |
| C | -1.76174617 | 3.78015059  | -16.24835250 |
| C | -0.36435836 | 4.15457952  | -16.24835250 |
| C | 2.39283336  | 3.41579223  | -16.24835250 |
| C | 3.41579223  | 2.39283336  | -16.24835250 |
| C | 4.15457952  | -0.36435836 | -16.24835250 |
| C | 3.78015059  | -1.76174617 | -16.24835250 |
| C | 1.76174617  | -3.78015059 | -16.24835250 |
| C | 0.36435836  | -4.15457952 | -16.24835250 |
| C | -2.39283336 | -3.41579223 | -16.24835250 |
| C | -3.41579223 | -2.39283336 | -16.24835250 |
| C | -4.15457952 | 0.36435836  | -16.24835250 |
| C | -3.78015059 | 1.76174617  | -16.24835250 |
| C | 0.36340605  | 4.15680929  | -15.00185988 |
| C | 1.76368577  | 3.78160546  | -15.00185988 |
| C | 3.78160546  | 1.76368577  | -15.00185988 |
| C | 4.15680929  | 0.36340605  | -15.00185988 |
| C | 3.41819942  | -2.39312351 | -15.00185988 |
| C | 2.39312351  | -3.41819942 | -15.00185988 |
| C | -0.36340605 | -4.15680929 | -15.00185988 |
| C | -1.76368577 | -3.78160546 | -15.00185988 |
| C | -3.78160546 | -1.76368577 | -15.00185988 |
| C | -4.15680929 | -0.36340605 | -15.00185988 |
| C | -3.41819942 | 2.39312351  | -15.00185988 |
| C | -2.39312351 | 3.41819942  | -15.00185988 |
| C | 2.39272049  | 3.41243774  | -13.75146761 |
| C | 3.41243774  | 2.39272049  | -13.75146761 |
| C | 4.15161801  | -0.36593786 | -13.75146761 |
| C | 3.77837560  | -1.75889752 | -13.75146761 |
| C | 1.75889752  | -3.77837560 | -13.75146761 |
| C | 0.36593786  | -4.15161801 | -13.75146761 |
| C | -2.39272049 | -3.41243774 | -13.75146761 |
| C | -3.41243774 | -2.39272049 | -13.75146761 |
| C | -4.15161801 | 0.36593786  | -13.75146761 |
| C | -3.77837560 | 1.75889752  | -13.75146761 |
| C | -1.75889752 | 3.77837560  | -13.75146761 |
| C | -0.36593786 | 4.15161801  | -13.75146761 |
| C | 3.77980359  | 1.76124602  | -12.49817635 |
| C | 4.15402894  | 0.36461800  | -12.49817635 |
| C | 3.41518559  | -2.39278292 | -12.49817635 |
| C | 2.39278292  | -3.41518559 | -12.49817635 |
| C | -0.36461800 | -4.15402894 | -12.49817635 |
| C | -1.76124602 | -3.77980359 | -12.49817635 |
| C | -3.77980359 | -1.76124602 | -12.49817635 |
| C | -4.15402894 | -0.36461800 | -12.49817635 |
| C | -3.41518559 | 2.39278292  | -12.49817635 |
| C | -2.39278292 | 3.41518559  | -12.49817635 |
| C | 0.36461800  | 4.15402894  | -12.49817635 |
| C | 1.76124602  | 3.77980359  | -12.49817635 |
| C | 4.15648317  | -0.36334134 | -11.25115846 |
| C | 3.78129069  | -1.76357876 | -11.25115846 |
| C | 1.76357876  | -3.78129069 | -11.25115846 |
| C | 0.36334134  | -4.15648317 | -11.25115846 |
| C | -2.39290442 | -3.41794935 | -11.25115846 |
| C | -3.41794935 | -2.39290442 | -11.25115846 |
| C | -4.15648317 | 0.36334134  | -11.25115846 |
| C | -3.78129069 | 1.76357876  | -11.25115846 |
| C | -1.76357876 | 3.78129069  | -11.25115846 |
| C | -0.36334134 | 4.15648317  | -11.25115846 |
| C | 2.39290442  | 3.41794935  | -11.25115846 |

|   |             |             |              |
|---|-------------|-------------|--------------|
| C | 3.41794935  | 2.39290442  | -11.25115846 |
| C | 3.41245723  | -2.39239691 | -10.00126449 |
| C | 2.39239691  | -3.41245723 | -10.00126449 |
| C | -0.36564788 | -4.15147310 | -10.00126449 |
| C | -1.75907619 | -3.77810511 | -10.00126449 |
| C | -3.77810511 | -1.75907619 | -10.00126449 |
| C | -4.15147310 | -0.36564788 | -10.00126449 |
| C | -3.41245723 | 2.39239691  | -10.00126449 |
| C | -2.39239691 | 3.41245723  | -10.00126449 |
| C | 0.36564788  | 4.15147310  | -10.00126449 |
| C | 1.75907619  | 3.77810511  | -10.00126449 |
| C | 3.77810511  | 1.75907619  | -10.00126449 |
| C | 4.15147310  | 0.36564788  | -10.00126449 |
| C | 1.76084783  | -3.77947267 | -8.74791363  |
| C | 0.36479738  | -4.15354326 | -8.74791363  |
| C | -2.39269543 | -3.41467529 | -8.74791363  |
| C | -3.41467529 | -2.39269543 | -8.74791363  |
| C | -4.15354326 | 0.36479738  | -8.74791363  |
| C | -3.77947267 | 1.76084783  | -8.74791363  |
| C | -1.76084783 | 3.77947267  | -8.74791363  |
| C | -0.36479738 | 4.15354326  | -8.74791363  |
| C | 2.39269543  | 3.41467529  | -8.74791363  |
| C | 3.41467529  | 2.39269543  | -8.74791363  |
| C | 4.15354326  | -0.36479738 | -8.74791363  |
| C | 3.77947267  | -1.76084783 | -8.74791363  |
| C | -0.36337294 | -4.15693939 | -7.50053497  |
| C | -1.76377950 | -3.78170158 | -7.50053497  |
| C | -3.78170158 | -1.76377950 | -7.50053497  |
| C | -4.15693939 | -0.36337294 | -7.50053497  |
| C | -3.41832865 | 2.39315989  | -7.50053497  |
| C | -2.39315989 | 3.41832865  | -7.50053497  |
| C | 0.36337294  | 4.15693939  | -7.50053497  |
| C | 1.76377950  | 3.78170158  | -7.50053497  |
| C | 3.78170158  | 1.76377950  | -7.50053497  |
| C | 4.15693939  | 0.36337294  | -7.50053497  |
| C | 3.41832865  | -2.39315989 | -7.50053497  |
| C | 2.39315989  | -3.41832865 | -7.50053497  |
| C | -2.39269577 | -3.41316257 | -6.25133646  |
| C | -3.41316257 | -2.39269577 | -6.25133646  |
| C | -4.15223338 | 0.36555403  | -6.25133646  |
| C | -3.77871661 | 1.75953761  | -6.25133646  |
| C | -1.75953761 | 3.77871661  | -6.25133646  |
| C | -0.36555403 | 4.15223338  | -6.25133646  |
| C | 2.39269577  | 3.41316257  | -6.25133646  |
| C | 3.41316257  | 2.39269577  | -6.25133646  |
| C | 4.15223338  | -0.36555403 | -6.25133646  |
| C | 3.77871661  | -1.75953761 | -6.25133646  |
| C | 1.75953761  | -3.77871661 | -6.25133646  |
| C | 0.36555403  | -4.15223338 | -6.25133646  |
| C | -3.77936245 | -1.76052134 | -4.99801534  |
| C | -4.15328456 | -0.36502502 | -4.99801534  |
| C | -3.41433743 | 2.39276322  | -4.99801534  |
| C | -2.39276322 | 3.41433743  | -4.99801534  |
| C | 0.36502502  | 4.15328456  | -4.99801534  |
| C | 1.76052134  | 3.77936245  | -4.99801534  |
| C | 3.77936245  | 1.76052134  | -4.99801534  |
| C | 4.15328456  | 0.36502502  | -4.99801534  |
| C | 3.41433743  | -2.39276322 | -4.99801534  |
| C | 2.39276322  | -3.41433743 | -4.99801534  |
| C | -0.36502502 | -4.15328456 | -4.99801534  |
| C | -1.76052134 | -3.77936245 | -4.99801534  |
| C | -4.15700603 | 0.36335717  | -3.75018185  |
| C | -3.78175142 | 1.76382648  | -3.75018185  |
| C | -1.76382648 | 3.78175142  | -3.75018185  |
| C | -0.36335717 | 4.15700603  | -3.75018185  |
| C | 2.39317956  | 3.41839424  | -3.75018185  |
| C | 3.41839424  | 2.39317956  | -3.75018185  |
| C | 4.15700603  | -0.36335717 | -3.75018185  |
| C | 3.78175142  | -1.76382648 | -3.75018185  |
| C | 1.76382648  | -3.78175142 | -3.75018185  |



|   |             |             |             |
|---|-------------|-------------|-------------|
| C | 0.36335717  | -4.15700603 | -3.75018185 |
| C | -2.39317956 | -3.41839424 | -3.75018185 |
| C | -3.41839424 | -2.39317956 | -3.75018185 |
| C | -3.41366814 | 2.39282763  | -2.50149987 |
| C | -2.39282763 | 3.41366814  | -2.50149987 |
| C | 0.36541544  | 4.15273714  | -2.50149987 |
| C | 1.75990952  | 3.77908358  | -2.50149987 |
| C | 3.77908358  | 1.75990952  | -2.50149987 |
| C | 4.15273714  | 0.36541544  | -2.50149987 |
| C | 3.41366814  | -2.39282763 | -2.50149987 |
| C | 2.39282763  | -3.41366814 | -2.50149987 |
| C | -0.36541544 | -4.15273714 | -2.50149987 |
| C | -1.75990952 | -3.77908358 | -2.50149987 |
| C | -3.77908358 | -1.75990952 | -2.50149987 |
| C | -4.15273714 | -0.36541544 | -2.50149987 |
| C | -1.76028345 | 3.77947273  | -1.24816387 |
| C | -0.36528618 | 4.15326113  | -1.24816387 |
| C | 2.39297767  | 3.41418656  | -1.24816387 |
| C | 3.41418656  | 2.39297767  | -1.24816387 |
| C | 4.15326113  | -0.36528618 | -1.24816387 |
| C | 3.77947273  | -1.76028345 | -1.24816387 |
| C | 1.76028345  | -3.77947273 | -1.24816387 |
| C | 0.36528618  | -4.15326113 | -1.24816387 |
| C | -2.39297767 | -3.41418656 | -1.24816387 |
| C | -3.41418656 | -2.39297767 | -1.24816387 |
| C | -4.15326113 | 0.36528618  | -1.24816387 |
| C | -3.77947273 | 1.76028345  | -1.24816387 |
| C | 0.36345038  | 4.15743647  | 0.00000000  |
| C | 1.76396097  | 3.78217079  | 0.00000000  |
| C | 3.78217079  | 1.76396097  | 0.00000000  |
| C | 4.15743647  | 0.36345038  | 0.00000000  |
| C | 3.41872041  | -2.39347550 | 0.00000000  |
| C | 2.39347550  | -3.41872041 | 0.00000000  |
| C | -0.36345038 | -4.15743647 | 0.00000000  |
| C | -1.76396097 | -3.78217079 | 0.00000000  |
| C | -3.78217079 | -1.76396097 | 0.00000000  |
| C | -4.15743647 | -0.36345038 | 0.00000000  |
| C | -3.41872041 | 2.39347550  | 0.00000000  |
| C | -2.39347550 | 3.41872041  | 0.00000000  |
| C | 2.39297767  | 3.41418656  | 1.24816387  |
| C | 3.41418656  | 2.39297767  | 1.24816387  |
| C | 4.15326113  | -0.36528618 | 1.24816387  |
| C | 3.77947273  | -1.76028345 | 1.24816387  |
| C | 1.76028345  | -3.77947273 | 1.24816387  |
| C | 0.36528618  | -4.15326113 | 1.24816387  |
| C | -2.39297767 | -3.41418656 | 1.24816387  |
| C | -3.41418656 | -2.39297767 | 1.24816387  |
| C | -4.15326113 | 0.36528618  | 1.24816387  |
| C | -3.77947273 | 1.76028345  | 1.24816387  |
| C | -1.76028345 | 3.77947273  | 1.24816387  |
| C | -0.36528618 | 4.15326113  | 1.24816387  |
| C | 3.77908358  | 1.75990952  | 2.50149987  |
| C | 4.15273714  | 0.36541544  | 2.50149987  |
| C | 3.41366814  | -2.39282763 | 2.50149987  |
| C | 2.39282763  | -3.41366814 | 2.50149987  |
| C | -0.36541544 | -4.15273714 | 2.50149987  |
| C | -1.75990952 | -3.77908358 | 2.50149987  |
| C | -3.77908358 | -1.75990952 | 2.50149987  |
| C | -4.15273714 | -0.36541544 | 2.50149987  |
| C | -3.41366814 | 2.39282763  | 2.50149987  |
| C | -2.39282763 | 3.41366814  | 2.50149987  |
| C | 0.36541544  | 4.15273714  | 2.50149987  |
| C | 1.75990952  | 3.77908358  | 2.50149987  |
| C | 4.15700603  | -0.36335717 | 3.75018185  |
| C | 3.78175142  | -1.76382648 | 3.75018185  |
| C | 1.76382648  | -3.78175142 | 3.75018185  |
| C | 0.36335717  | -4.15700603 | 3.75018185  |
| C | -2.39317956 | -3.41839424 | 3.75018185  |
| C | -3.41839424 | -2.39317956 | 3.75018185  |
| C | -4.15700603 | 0.36335717  | 3.75018185  |

|   |             |             |             |
|---|-------------|-------------|-------------|
| C | -3.78175142 | 1.76382648  | 3.75018185  |
| C | -1.76382648 | 3.78175142  | 3.75018185  |
| C | -0.36335717 | 4.15700603  | 3.75018185  |
| C | 2.39317956  | 3.41839424  | 3.75018185  |
| C | 3.41839424  | 2.39317956  | 3.75018185  |
| C | 3.41433743  | -2.39276322 | 4.99801534  |
| C | 2.39276322  | -3.41433743 | 4.99801534  |
| C | -0.36502502 | -4.15328456 | 4.99801534  |
| C | -1.76052134 | -3.77936245 | 4.99801534  |
| C | -3.77936245 | -1.76052134 | 4.99801534  |
| C | -4.15328456 | -0.36502502 | 4.99801534  |
| C | -3.41433743 | 2.39276322  | 4.99801534  |
| C | -2.39276322 | 3.41433743  | 4.99801534  |
| C | 0.36502502  | 4.15328456  | 4.99801534  |
| C | 1.76052134  | 3.77936245  | 4.99801534  |
| C | 3.77936245  | 1.76052134  | 4.99801534  |
| C | 4.15328456  | 0.36502502  | 4.99801534  |
| C | 1.75953761  | -3.77871661 | 6.25133646  |
| C | 0.36555403  | -4.15223338 | 6.25133646  |
| C | -2.39269577 | -3.41316257 | 6.25133646  |
| C | -3.41316257 | -2.39269577 | 6.25133646  |
| C | -4.15223338 | 0.36555403  | 6.25133646  |
| C | -3.77871661 | 1.75953761  | 6.25133646  |
| C | -1.75953761 | 3.77871661  | 6.25133646  |
| C | -0.36555403 | 4.15223338  | 6.25133646  |
| C | 2.39269577  | 3.41316257  | 6.25133646  |
| C | 3.41316257  | 2.39269577  | 6.25133646  |
| C | 4.15223338  | -0.36555403 | 6.25133646  |
| C | 3.77871661  | -1.75953761 | 6.25133646  |
| C | -0.36337294 | -4.15693939 | 7.50053497  |
| C | -1.76377950 | -3.78170158 | 7.50053497  |
| C | -3.78170158 | -1.76377950 | 7.50053497  |
| C | -4.15693939 | -0.36337294 | 7.50053497  |
| C | -3.41832865 | 2.39315989  | 7.50053497  |
| C | -2.39315989 | 3.41832865  | 7.50053497  |
| C | 0.36337294  | 4.15693939  | 7.50053497  |
| C | 1.76377950  | 3.78170158  | 7.50053497  |
| C | 3.78170158  | 1.76377950  | 7.50053497  |
| C | 4.15693939  | 0.36337294  | 7.50053497  |
| C | 3.41832865  | -2.39315989 | 7.50053497  |
| C | 2.39315989  | -3.41832865 | 7.50053497  |
| C | -2.39269543 | -3.41467529 | 8.74791363  |
| C | -3.41467529 | -2.39269543 | 8.74791363  |
| C | -4.15354326 | 0.36479738  | 8.74791363  |
| C | -3.77947267 | 1.76084783  | 8.74791363  |
| C | -1.76084783 | 3.77947267  | 8.74791363  |
| C | -0.36479738 | 4.15354326  | 8.74791363  |
| C | 2.39269543  | 3.41467529  | 8.74791363  |
| C | 3.41467529  | 2.39269543  | 8.74791363  |
| C | 4.15354326  | -0.36479738 | 8.74791363  |
| C | 3.77947267  | -1.76084783 | 8.74791363  |
| C | 1.76084783  | -3.77947267 | 8.74791363  |
| C | 0.36479738  | -4.15354326 | 8.74791363  |
| C | -3.77810511 | -1.75907619 | 10.00126449 |
| C | -4.15147310 | -0.36564788 | 10.00126449 |
| C | -3.41245723 | 2.39239691  | 10.00126449 |
| C | -2.39239691 | 3.41245723  | 10.00126449 |
| C | 0.36564788  | 4.15147310  | 10.00126449 |
| C | 1.75907619  | 3.77810511  | 10.00126449 |
| C | 3.77810511  | 1.75907619  | 10.00126449 |
| C | 4.15147310  | 0.36564788  | 10.00126449 |
| C | 3.41245723  | -2.39239691 | 10.00126449 |
| C | 2.39239691  | -3.41245723 | 10.00126449 |
| C | -0.36564788 | -4.15147310 | 10.00126449 |
| C | -1.75907619 | -3.77810511 | 10.00126449 |
| C | -4.15648317 | 0.36334134  | 11.25115846 |
| C | -3.78129069 | 1.76357876  | 11.25115846 |
| C | -1.76357876 | 3.78129069  | 11.25115846 |
| C | -0.36334134 | 4.15648317  | 11.25115846 |
| C | 2.39290442  | 3.41794935  | 11.25115846 |

|   |             |             |             |
|---|-------------|-------------|-------------|
| C | 3.41794935  | 2.39290442  | 11.25115846 |
| C | 4.15648317  | -0.36334134 | 11.25115846 |
| C | 3.78129069  | -1.76357876 | 11.25115846 |
| C | 1.76357876  | -3.78129069 | 11.25115846 |
| C | 0.36334134  | -4.15648317 | 11.25115846 |
| C | -2.39290442 | -3.41794935 | 11.25115846 |
| C | -3.41794935 | -2.39290442 | 11.25115846 |
| C | -3.41518559 | 2.39278292  | 12.49817635 |
| C | -2.39278292 | 3.41518559  | 12.49817635 |
| C | 0.36461800  | 4.15402894  | 12.49817635 |
| C | 1.76124602  | 3.77980359  | 12.49817635 |
| C | 3.77980359  | 1.76124602  | 12.49817635 |
| C | 4.15402894  | 0.36461800  | 12.49817635 |
| C | 3.41518559  | -2.39278292 | 12.49817635 |
| C | 2.39278292  | -3.41518559 | 12.49817635 |
| C | -0.36461800 | -4.15402894 | 12.49817635 |
| C | -1.76124602 | -3.77980359 | 12.49817635 |
| C | -3.77980359 | -1.76124602 | 12.49817635 |
| C | -4.15402894 | -0.36461800 | 12.49817635 |
| C | -1.75889752 | 3.77837560  | 13.75146761 |
| C | -0.36593786 | 4.15161801  | 13.75146761 |
| C | 2.39272049  | 3.41243774  | 13.75146761 |
| C | 3.41243774  | 2.39272049  | 13.75146761 |
| C | 4.15161801  | -0.36593786 | 13.75146761 |
| C | 3.77837560  | -1.75889752 | 13.75146761 |
| C | 1.75889752  | -3.77837560 | 13.75146761 |
| C | 0.36593786  | -4.15161801 | 13.75146761 |
| C | -2.39272049 | -3.41243774 | 13.75146761 |
| C | -3.41243774 | -2.39272049 | 13.75146761 |
| C | -4.15161801 | 0.36593786  | 13.75146761 |
| C | -3.77837560 | 1.75889752  | 13.75146761 |
| C | 0.36340605  | 4.15680929  | 15.00185988 |
| C | 1.76368577  | 3.78160546  | 15.00185988 |
| C | 3.78160546  | 1.76368577  | 15.00185988 |
| C | 4.15680929  | 0.36340605  | 15.00185988 |
| C | 3.41819942  | -2.39312351 | 15.00185988 |
| C | 2.39312351  | -3.41819942 | 15.00185988 |
| C | -0.36340605 | -4.15680929 | 15.00185988 |
| C | -1.76368577 | -3.78160546 | 15.00185988 |
| C | -3.78160546 | -1.76368577 | 15.00185988 |
| C | -4.15680929 | -0.36340605 | 15.00185988 |
| C | -3.41819942 | 2.39312351  | 15.00185988 |
| C | -2.39312351 | 3.41819942  | 15.00185988 |
| C | 2.39283336  | 3.41579223  | 16.24835250 |
| C | 3.41579223  | 2.39283336  | 16.24835250 |
| C | 4.15457952  | -0.36435836 | 16.24835250 |
| C | 3.78015059  | -1.76174617 | 16.24835250 |
| C | 1.76174617  | -3.78015059 | 16.24835250 |
| C | 0.36435836  | -4.15457952 | 16.24835250 |
| C | -2.39283336 | -3.41579223 | 16.24835250 |
| C | -3.41579223 | -2.39283336 | 16.24835250 |
| C | -4.15457952 | 0.36435836  | 16.24835250 |
| C | -3.78015059 | 1.76174617  | 16.24835250 |
| C | -1.76174617 | 3.78015059  | 16.24835250 |
| C | -0.36435836 | 4.15457952  | 16.24835250 |
| C | 3.77830674  | 1.75857840  | 17.50161866 |
| C | 4.15139882  | 0.36617980  | 17.50161866 |
| C | 3.41212694  | -2.39282042 | 17.50161866 |
| C | 2.39282042  | -3.41212694 | 17.50161866 |
| C | -0.36617980 | -4.15139882 | 17.50161866 |
| C | -1.75857840 | -3.77830674 | 17.50161866 |
| C | -3.77830674 | -1.75857840 | 17.50161866 |
| C | -4.15139882 | -0.36617980 | 17.50161866 |
| C | -3.41212694 | 2.39282042  | 17.50161866 |
| C | -2.39282042 | 3.41212694  | 17.50161866 |
| C | 0.36617980  | 4.15139882  | 17.50161866 |
| C | 1.75857840  | 3.77830674  | 17.50161866 |
| C | 4.15744424  | -0.36355259 | 18.75269157 |
| C | 3.78222862  | -1.76387634 | 18.75269157 |
| C | 1.76387634  | -3.78222862 | 18.75269157 |

|   |             |             |             |
|---|-------------|-------------|-------------|
| C | 0.36355259  | -4.15744424 | 18.75269157 |
| C | -2.39356790 | -3.41867603 | 18.75269157 |
| C | -3.41867603 | -2.39356790 | 18.75269157 |
| C | -4.15744424 | 0.36355259  | 18.75269157 |
| C | -3.78222862 | 1.76387634  | 18.75269157 |
| C | -1.76387634 | 3.78222862  | 18.75269157 |
| C | -0.36355259 | 4.15744424  | 18.75269157 |
| C | 2.39356790  | 3.41867603  | 18.75269157 |
| C | 3.41867603  | 2.39356790  | 18.75269157 |
| C | 3.41714434  | -2.39347023 | 19.99865026 |
| C | 2.39347023  | -3.41714434 | 19.99865026 |
| C | -0.36423385 | -4.15606892 | 19.99865026 |
| C | -1.76259869 | -3.78137819 | 19.99865026 |
| C | -3.78137819 | -1.76259869 | 19.99865026 |
| C | -4.15606892 | -0.36423385 | 19.99865026 |
| C | -3.41714434 | 2.39347023  | 19.99865026 |
| C | -2.39347023 | 3.41714434  | 19.99865026 |
| C | 0.36423385  | 4.15606892  | 19.99865026 |
| C | 1.76259869  | 3.78137819  | 19.99865026 |
| C | 3.78137819  | 1.76259869  | 19.99865026 |
| C | 4.15606892  | 0.36423385  | 19.99865026 |
| C | 1.75820451  | -3.77855489 | 21.25156739 |
| C | 0.36662767  | -4.15142678 | 21.25156739 |
| C | -2.39322227 | -3.41192721 | 21.25156739 |
| C | -3.41192721 | -2.39322227 | 21.25156739 |
| C | -4.15142678 | 0.36662767  | 21.25156739 |
| C | -3.77855489 | 1.75820451  | 21.25156739 |
| C | -1.75820451 | 3.77855489  | 21.25156739 |
| C | -0.36662767 | 4.15142678  | 21.25156739 |
| C | 2.39322227  | 3.41192721  | 21.25156739 |
| C | 3.41192721  | 2.39322227  | 21.25156739 |
| C | 4.15142678  | -0.36662767 | 21.25156739 |
| C | 3.77855489  | -1.75820451 | 21.25156739 |
| C | -0.36365218 | -4.15767390 | 22.50362622 |
| C | -1.76390492 | -3.78247731 | 22.50362622 |
| C | -3.78247731 | -1.76390492 | 22.50362622 |
| C | -4.15767390 | -0.36365218 | 22.50362622 |
| C | -3.41882513 | 2.39376898  | 22.50362622 |
| C | -2.39376898 | 3.41882513  | 22.50362622 |
| C | 0.36365218  | 4.15767390  | 22.50362622 |
| C | 1.76390492  | 3.78247731  | 22.50362622 |
| C | 3.78247731  | 1.76390492  | 22.50362622 |
| C | 4.15767390  | 0.36365218  | 22.50362622 |
| C | 3.41882513  | -2.39376898 | 22.50362622 |
| C | 2.39376898  | -3.41882513 | 22.50362622 |
| C | -2.39379172 | -3.41844697 | 23.74839436 |
| C | -3.41844697 | -2.39379172 | 23.74839436 |
| C | -4.15735778 | 0.36386095  | 23.74839436 |
| C | -3.78230793 | 1.76356606  | 23.74839436 |
| C | -1.76356606 | 3.78230793  | 23.74839436 |
| C | -0.36386095 | 4.15735778  | 23.74839436 |
| C | 2.39379172  | 3.41844697  | 23.74839436 |
| C | 3.41844697  | 2.39379172  | 23.74839436 |
| C | 4.15735778  | -0.36386095 | 23.74839436 |
| C | 3.78230793  | -1.76356606 | 23.74839436 |
| C | 1.76356606  | -3.78230793 | 23.74839436 |
| C | 0.36386095  | -4.15735778 | 23.74839436 |
| C | -3.77828463 | -1.75733280 | 25.00096362 |
| C | -4.15075688 | -0.36724747 | 25.00096362 |
| C | -3.41103716 | 2.39342408  | 25.00096362 |
| C | -2.39342408 | 3.41103716  | 25.00096362 |
| C | 0.36724747  | 4.15075688  | 25.00096362 |
| C | 1.75733280  | 3.77828463  | 25.00096362 |
| C | 3.77828463  | 1.75733280  | 25.00096362 |
| C | 4.15075688  | 0.36724747  | 25.00096362 |
| C | 3.41103716  | -2.39342408 | 25.00096362 |
| C | 2.39342408  | -3.41103716 | 25.00096362 |
| C | -0.36724747 | -4.15075688 | 25.00096362 |
| C | -1.75733280 | -3.77828463 | 25.00096362 |
| C | -4.15676418 | 0.36351768  | 26.25457788 |

|   |             |             |             |
|---|-------------|-------------|-------------|
| C | -3.78162222 | 1.76356655  | 26.25457788 |
| C | -1.76356655 | 3.78162222  | 26.25457788 |
| C | -0.36351768 | 4.15676418  | 26.25457788 |
| C | 2.39319763  | 3.41810454  | 26.25457788 |
| C | 3.41810454  | 2.39319763  | 26.25457788 |
| C | 4.15676418  | -0.36351768 | 26.25457788 |
| C | 3.78162222  | -1.76356655 | 26.25457788 |
| C | 1.76356655  | -3.78162222 | 26.25457788 |
| C | 0.36351768  | -4.15676418 | 26.25457788 |
| C | -2.39319763 | -3.41810454 | 26.25457788 |
| C | -3.41810454 | -2.39319763 | 26.25457788 |
| C | -3.41566597 | 2.39022790  | 27.49760599 |
| C | -2.39022790 | 3.41566597  | 27.49760599 |
| C | 0.36216510  | 4.15316745  | 27.49760599 |
| C | 1.76293955  | 3.77783107  | 27.49760599 |
| C | 3.77783107  | 1.76293955  | 27.49760599 |
| C | 4.15316745  | 0.36216510  | 27.49760599 |
| C | 3.41566597  | -2.39022790 | 27.49760599 |
| C | 2.39022790  | -3.41566597 | 27.49760599 |
| C | -0.36216510 | -4.15316745 | 27.49760599 |
| C | -1.76293955 | -3.77783107 | 27.49760599 |
| C | -3.77783107 | -1.76293955 | 27.49760599 |
| C | -4.15316745 | -0.36216510 | 27.49760599 |
| C | -1.74938561 | 3.76353109  | 28.74977548 |
| C | -0.36675316 | 4.13400634  | 28.74977548 |
| C | 2.38462073  | 3.39677793  | 28.74977548 |
| C | 3.39677793  | 2.38462073  | 28.74977548 |
| C | 4.13400634  | -0.36675316 | 28.74977548 |
| C | 3.76353109  | -1.74938561 | 28.74977548 |
| C | 1.74938561  | -3.76353109 | 28.74977548 |
| C | 0.36675316  | -4.13400634 | 28.74977548 |
| C | -2.38462073 | -3.39677793 | 28.74977548 |
| C | -3.39677793 | -2.38462073 | 28.74977548 |
| C | -4.13400634 | 0.36675316  | 28.74977548 |
| C | -3.76353109 | 1.74938561  | 28.74977548 |
| C | 0.35964365  | 4.14594190  | 30.01180084 |
| C | 1.76151041  | 3.77031283  | 30.01180084 |
| C | 3.77031283  | 1.76151041  | 30.01180084 |
| C | 4.14594190  | 0.35964365  | 30.01180084 |
| C | 3.41066918  | -2.38443149 | 30.01180084 |
| C | 2.38443149  | -3.41066918 | 30.01180084 |
| C | -0.35964365 | -4.14594190 | 30.01180084 |
| C | -1.76151041 | -3.77031283 | 30.01180084 |
| C | -3.77031283 | -1.76151041 | 30.01180084 |
| C | -4.14594190 | -0.35964365 | 30.01180084 |
| C | -3.41066918 | 2.38443149  | 30.01180084 |
| C | -2.38443149 | 3.41066918  | 30.01180084 |
| C | 2.41305702  | 3.45367243  | 31.25193718 |
| C | 3.45367243  | 2.41305702  | 31.25193718 |
| C | 4.19749657  | -0.36293246 | 31.25193718 |
| C | 3.81660489  | -1.78443955 | 31.25193718 |
| C | 1.78443955  | -3.81660489 | 31.25193718 |
| C | 0.36293246  | -4.19749657 | 31.25193718 |
| C | -2.41305702 | -3.45367243 | 31.25193718 |
| C | -3.45367243 | -2.41305702 | 31.25193718 |
| C | -4.19749657 | 0.36293246  | 31.25193718 |
| C | -3.81660489 | 1.78443955  | 31.25193718 |
| C | -1.78443955 | 3.81660489  | 31.25193718 |
| C | -0.36293246 | 4.19749657  | 31.25193718 |
| C | 3.88788518  | 1.75885890  | 32.46648357 |
| C | 4.24643678  | 0.42072610  | 32.46648357 |
| C | 3.46715908  | -2.48757788 | 32.46648357 |
| C | 2.48757788  | -3.46715908 | 32.46648357 |
| C | -0.42072610 | -4.24643678 | 32.46648357 |
| C | -1.75885890 | -3.88788518 | 32.46648357 |
| C | -3.88788518 | -1.75885890 | 32.46648357 |
| C | -4.24643678 | -0.42072610 | 32.46648357 |
| C | -3.46715908 | 2.48757788  | 32.46648357 |
| C | -2.48757788 | 3.46715908  | 32.46648357 |
| C | 0.42072610  | 4.24643678  | 32.46648357 |

|   |             |             |              |
|---|-------------|-------------|--------------|
| C | 1.75885890  | 3.88788518  | 32.46648357  |
| H | -3.88590898 | 2.15138610  | -33.42351113 |
| H | -2.15138610 | 3.88590898  | -33.42351113 |
| H | -0.07979947 | 4.44098895  | -33.42351113 |
| H | 2.28960284  | 3.80610951  | -33.42351113 |
| H | 3.80610951  | 2.28960284  | -33.42351113 |
| H | 4.44098895  | -0.07979947 | -33.42351113 |
| H | 3.88590898  | -2.15138610 | -33.42351113 |
| H | 2.15138610  | -3.88590898 | -33.42351113 |
| H | 0.07979947  | -4.44098895 | -33.42351113 |
| H | -2.28960284 | -3.80610951 | -33.42351113 |
| H | -3.80610951 | -2.28960284 | -33.42351113 |
| H | -4.44098895 | 0.07979947  | -33.42351113 |
| H | 3.80610951  | 2.28960284  | 33.42351113  |
| H | 4.44098895  | -0.07979947 | 33.42351113  |
| H | 3.88590898  | -2.15138610 | 33.42351113  |
| H | 2.15138610  | -3.88590898 | 33.42351113  |
| H | 0.07979947  | -4.44098895 | 33.42351113  |
| H | -2.28960284 | -3.80610951 | 33.42351113  |
| H | -3.80610951 | -2.28960284 | 33.42351113  |
| H | -4.44098895 | 0.07979947  | 33.42351113  |
| H | -3.88590898 | 2.15138610  | 33.42351113  |
| H | -2.15138610 | 3.88590898  | 33.42351113  |
| H | -0.07979947 | 4.44098895  | 33.42351113  |
| H | 2.28960284  | 3.80610951  | 33.42351113  |

Nanotube (6,6) u27v0s  
B3LYP/STO-3G Energy: -24409.859975

|   |           |           |           |
|---|-----------|-----------|-----------|
| 6 | 3.993682  | 1.506704  | 33.099994 |
| 6 | 3.301685  | 2.705278  | 33.099994 |
| 6 | 0.691997  | 4.211982  | 33.099994 |
| 6 | -0.691997 | 4.211982  | 33.099994 |
| 6 | -3.301685 | 2.705278  | 33.099994 |
| 6 | -3.993682 | 1.506704  | 33.099994 |
| 6 | -3.993682 | -1.506704 | 33.099994 |
| 6 | -3.301685 | -2.705278 | 33.099994 |
| 6 | -0.691997 | -4.211982 | 33.099994 |
| 6 | 0.691997  | -4.211982 | 33.099994 |
| 6 | 3.301685  | -2.705278 | 33.099994 |
| 6 | 3.993682  | -1.506704 | 33.099994 |
| 6 | 2.709772  | 3.223875  | 31.884683 |
| 6 | 1.437072  | 3.958669  | 31.884683 |
| 6 | -1.437072 | 3.958669  | 31.884683 |
| 6 | -2.709772 | 3.223875  | 31.884683 |
| 6 | -4.146844 | 0.734794  | 31.884683 |
| 6 | -4.146844 | -0.734794 | 31.884683 |
| 6 | -2.709772 | -3.223875 | 31.884683 |
| 6 | -1.437072 | -3.958669 | 31.884683 |
| 6 | 1.437072  | -3.958669 | 31.884683 |
| 6 | 2.709772  | -3.223875 | 31.884683 |
| 6 | 4.146844  | -0.734794 | 31.884683 |
| 6 | 4.146844  | 0.734794  | 31.884683 |
| 6 | 0.725861  | 4.097449  | 30.644366 |
| 6 | -0.725861 | 4.097449  | 30.644366 |
| 6 | -3.185565 | 2.677338  | 30.644366 |
| 6 | -3.911425 | 1.420111  | 30.644366 |
| 6 | -3.911425 | -1.420111 | 30.644366 |
| 6 | -3.185565 | -2.677338 | 30.644366 |
| 6 | -0.725861 | -4.097449 | 30.644366 |
| 6 | 0.725861  | -4.097449 | 30.644366 |
| 6 | 3.185565  | -2.677338 | 30.644366 |
| 6 | 3.911425  | -1.420111 | 30.644366 |
| 6 | 3.911425  | 1.420111  | 30.644366 |
| 6 | 3.185565  | 2.677338  | 30.644366 |
| 6 | -1.424075 | 3.897036  | 29.383065 |
| 6 | -2.662894 | 3.181803  | 29.383065 |
| 6 | -4.086969 | 0.715232  | 29.383065 |

|   |           |           |           |
|---|-----------|-----------|-----------|
| 6 | -4.086969 | -0.715232 | 29.383065 |
| 6 | -2.662894 | -3.181803 | 29.383065 |
| 6 | -1.424075 | -3.897036 | 29.383065 |
| 6 | 1.424075  | -3.897036 | 29.383065 |
| 6 | 2.662894  | -3.181803 | 29.383065 |
| 6 | 4.086969  | -0.715232 | 29.383065 |
| 6 | 4.086969  | 0.715232  | 29.383065 |
| 6 | 2.662894  | 3.181803  | 29.383065 |
| 6 | 1.424075  | 3.897036  | 29.383065 |
| 6 | -3.191470 | 2.678524  | 28.129312 |
| 6 | -3.915405 | 1.424632  | 28.129312 |
| 6 | -3.915405 | -1.424632 | 28.129312 |
| 6 | -3.191470 | -2.678524 | 28.129312 |
| 6 | -0.723935 | -4.103156 | 28.129312 |
| 6 | 0.723935  | -4.103156 | 28.129312 |
| 6 | 3.191470  | -2.678524 | 28.129312 |
| 6 | 3.915405  | -1.424632 | 28.129312 |
| 6 | 3.915405  | 1.424632  | 28.129312 |
| 6 | 3.191470  | 2.678524  | 28.129312 |
| 6 | 0.723935  | 4.103156  | 28.129312 |
| 6 | -0.723935 | 4.103156  | 28.129312 |
| 6 | -4.108423 | 0.724894  | 26.885828 |
| 6 | -4.108423 | -0.724894 | 26.885828 |
| 6 | -2.681988 | -3.195552 | 26.885828 |
| 6 | -1.426435 | -3.920445 | 26.885828 |
| 6 | 1.426435  | -3.920445 | 26.885828 |
| 6 | 2.681988  | -3.195552 | 26.885828 |
| 6 | 4.108423  | -0.724894 | 26.885828 |
| 6 | 4.108423  | 0.724894  | 26.885828 |
| 6 | 2.681988  | 3.195552  | 26.885828 |
| 6 | 1.426435  | 3.920445  | 26.885828 |
| 6 | -1.426435 | 3.920445  | 26.885828 |
| 6 | -2.681988 | 3.195552  | 26.885828 |
| 6 | -3.912770 | -1.428583 | 25.633028 |
| 6 | -3.193574 | -2.674267 | 25.633028 |
| 6 | -0.719196 | -4.102849 | 25.633028 |
| 6 | 0.719196  | -4.102849 | 25.633028 |
| 6 | 3.193574  | -2.674267 | 25.633028 |
| 6 | 3.912770  | -1.428583 | 25.633028 |
| 6 | 3.912770  | 1.428583  | 25.633028 |
| 6 | 3.193574  | 2.674267  | 25.633028 |
| 6 | 0.719196  | 4.102849  | 25.633028 |
| 6 | -0.719196 | 4.102849  | 25.633028 |
| 6 | -3.193574 | 2.674267  | 25.633028 |
| 6 | -3.912770 | 1.428583  | 25.633028 |
| 6 | -2.680000 | -3.195469 | 24.378927 |
| 6 | -1.427358 | -3.918682 | 24.378927 |
| 6 | 1.427358  | -3.918682 | 24.378927 |
| 6 | 2.680000  | -3.195469 | 24.378927 |
| 6 | 4.107357  | -0.723213 | 24.378927 |
| 6 | 4.107357  | 0.723213  | 24.378927 |
| 6 | 2.680000  | 3.195469  | 24.378927 |
| 6 | 1.427358  | 3.918682  | 24.378927 |
| 6 | -1.427358 | 3.918682  | 24.378927 |
| 6 | -2.680000 | 3.195469  | 24.378927 |
| 6 | -4.107357 | 0.723213  | 24.378927 |
| 6 | -4.107357 | -0.723213 | 24.378927 |
| 6 | -0.725106 | -4.109483 | 23.133349 |
| 6 | 0.725106  | -4.109483 | 23.133349 |
| 6 | 3.196364  | -2.682702 | 23.133349 |
| 6 | 3.921470  | -1.426781 | 23.133349 |
| 6 | 3.921470  | 1.426781  | 23.133349 |
| 6 | 3.196364  | 2.682702  | 23.133349 |
| 6 | 0.725106  | 4.109483  | 23.133349 |
| 6 | -0.725106 | 4.109483  | 23.133349 |
| 6 | -3.196364 | 2.682702  | 23.133349 |
| 6 | -3.921470 | 1.426781  | 23.133349 |
| 6 | -3.921470 | -1.426781 | 23.133349 |
| 6 | -3.196364 | -2.682702 | 23.133349 |
| 6 | 1.427986  | -3.913801 | 21.882674 |

|   |           |           |           |
|---|-----------|-----------|-----------|
| 6 | 2.675459  | -3.193572 | 21.882674 |
| 6 | 4.103444  | -0.720229 | 21.882674 |
| 6 | 4.103444  | 0.720229  | 21.882674 |
| 6 | 2.675459  | 3.193572  | 21.882674 |
| 6 | 1.427986  | 3.913801  | 21.882674 |
| 6 | -1.427986 | 3.913801  | 21.882674 |
| 6 | -2.675459 | 3.193572  | 21.882674 |
| 6 | -4.103444 | 0.720229  | 21.882674 |
| 6 | -4.103444 | -0.720229 | 21.882674 |
| 6 | -2.675459 | -3.193572 | 21.882674 |
| 6 | -1.427986 | -3.913801 | 21.882674 |
| 6 | 3.194593  | -2.678410 | 20.628278 |
| 6 | 3.916867  | -1.427393 | 20.628278 |
| 6 | 3.916867  | 1.427393  | 20.628278 |
| 6 | 3.194593  | 2.678410  | 20.628278 |
| 6 | 0.722275  | 4.105803  | 20.628278 |
| 6 | -0.722275 | 4.105803  | 20.628278 |
| 6 | -3.194593 | 2.678410  | 20.628278 |
| 6 | -3.916867 | 1.427393  | 20.628278 |
| 6 | -3.916867 | -1.427393 | 20.628278 |
| 6 | -3.194593 | -2.678410 | 20.628278 |
| 6 | -0.722275 | -4.105803 | 20.628278 |
| 6 | 0.722275  | -4.105803 | 20.628278 |
| 6 | 4.109196  | -0.725037 | 19.381271 |
| 6 | 4.109196  | 0.725037  | 19.381271 |
| 6 | 2.682499  | 3.196150  | 19.381271 |
| 6 | 1.426697  | 3.921187  | 19.381271 |
| 6 | -1.426697 | 3.921187  | 19.381271 |
| 6 | -2.682499 | 3.196150  | 19.381271 |
| 6 | -4.109196 | 0.725037  | 19.381271 |
| 6 | -4.109196 | -0.725037 | 19.381271 |
| 6 | -2.682499 | -3.196150 | 19.381271 |
| 6 | -1.426697 | -3.921187 | 19.381271 |
| 6 | 1.426697  | -3.921187 | 19.381271 |
| 6 | 2.682499  | -3.196150 | 19.381271 |
| 6 | 3.914938  | 1.427812  | 18.131845 |
| 6 | 3.193990  | 2.676530  | 18.131845 |
| 6 | 0.720948  | 4.104342  | 18.131845 |
| 6 | -0.720948 | 4.104342  | 18.131845 |
| 6 | -3.193990 | 2.676530  | 18.131845 |
| 6 | -3.914938 | 1.427812  | 18.131845 |
| 6 | -3.914938 | -1.427812 | 18.131845 |
| 6 | -3.193990 | -2.676530 | 18.131845 |
| 6 | -0.720948 | -4.104342 | 18.131845 |
| 6 | 0.720948  | -4.104342 | 18.131845 |
| 6 | 3.193990  | -2.676530 | 18.131845 |
| 6 | 3.914938  | -1.427812 | 18.131845 |
| 6 | 2.677604  | 3.194322  | 16.877503 |
| 6 | 1.427562  | 3.916034  | 16.877503 |
| 6 | -1.427562 | 3.916034  | 16.877503 |
| 6 | -2.677604 | 3.194322  | 16.877503 |
| 6 | -4.105166 | 0.721712  | 16.877503 |
| 6 | -4.105166 | -0.721712 | 16.877503 |
| 6 | -2.677604 | -3.194322 | 16.877503 |
| 6 | -1.427562 | -3.916034 | 16.877503 |
| 6 | 1.427562  | -3.916034 | 16.877503 |
| 6 | 2.677604  | -3.194322 | 16.877503 |
| 6 | 4.105166  | -0.721712 | 16.877503 |
| 6 | 4.105166  | 0.721712  | 16.877503 |
| 6 | 0.724917  | 4.109095  | 15.629378 |
| 6 | -0.724917 | 4.109095  | 15.629378 |
| 6 | -3.196122 | 2.682344  | 15.629378 |
| 6 | -3.921039 | 1.426751  | 15.629378 |
| 6 | -3.921039 | -1.426751 | 15.629378 |
| 6 | -3.196122 | -2.682344 | 15.629378 |
| 6 | -0.724917 | -4.109095 | 15.629378 |
| 6 | 0.724917  | -4.109095 | 15.629378 |
| 6 | 3.196122  | -2.682344 | 15.629378 |
| 6 | 3.921039  | -1.426751 | 15.629378 |
| 6 | 3.921039  | 1.426751  | 15.629378 |



|   |           |           |           |
|---|-----------|-----------|-----------|
| 6 | 3.196122  | 2.682344  | 15.629378 |
| 6 | -1.427644 | 3.915922  | 14.380864 |
| 6 | -2.677466 | 3.194337  | 14.380864 |
| 6 | -4.105110 | 0.721585  | 14.380864 |
| 6 | -4.105110 | -0.721585 | 14.380864 |
| 6 | -2.677466 | -3.194337 | 14.380864 |
| 6 | -1.427644 | -3.915922 | 14.380864 |
| 6 | 1.427644  | -3.915922 | 14.380864 |
| 6 | 2.677466  | -3.194337 | 14.380864 |
| 6 | 4.105110  | -0.721585 | 14.380864 |
| 6 | 4.105110  | 0.721585  | 14.380864 |
| 6 | 2.677466  | 3.194337  | 14.380864 |
| 6 | 1.427644  | 3.915922  | 14.380864 |
| 6 | -3.194123 | 2.676990  | 13.126792 |
| 6 | -3.915403 | 1.427696  | 13.126792 |
| 6 | -3.915403 | -1.427696 | 13.126792 |
| 6 | -3.194123 | -2.676990 | 13.126792 |
| 6 | -0.721280 | -4.104686 | 13.126792 |
| 6 | 0.721280  | -4.104686 | 13.126792 |
| 6 | 3.194123  | -2.676990 | 13.126792 |
| 6 | 3.915403  | -1.427696 | 13.126792 |
| 6 | 3.915403  | 1.427696  | 13.126792 |
| 6 | 3.194123  | 2.676990  | 13.126792 |
| 6 | 0.721280  | 4.104686  | 13.126792 |
| 6 | -0.721280 | 4.104686  | 13.126792 |
| 6 | -4.108870 | 0.724717  | 11.877691 |
| 6 | -4.108870 | -0.724717 | 11.877691 |
| 6 | -2.682058 | -3.196028 | 11.877691 |
| 6 | -1.426812 | -3.920744 | 11.877691 |
| 6 | 1.426812  | -3.920744 | 11.877691 |
| 6 | 2.682058  | -3.196028 | 11.877691 |
| 6 | 4.108870  | -0.724717 | 11.877691 |
| 6 | 4.108870  | 0.724717  | 11.877691 |
| 6 | 2.682058  | 3.196028  | 11.877691 |
| 6 | 1.426812  | 3.920744  | 11.877691 |
| 6 | -1.426812 | 3.920744  | 11.877691 |
| 6 | -2.682058 | 3.196028  | 11.877691 |
| 6 | -3.916832 | -1.427495 | 10.629869 |
| 6 | -3.194663 | -2.678329 | 10.629869 |
| 6 | -0.722169 | -4.105823 | 10.629869 |
| 6 | 0.722169  | -4.105823 | 10.629869 |
| 6 | 3.194663  | -2.678329 | 10.629869 |
| 6 | 3.916832  | -1.427495 | 10.629869 |
| 6 | 3.916832  | 1.427495  | 10.629869 |
| 6 | 3.194663  | 2.678329  | 10.629869 |
| 6 | 0.722169  | 4.105823  | 10.629869 |
| 6 | -0.722169 | 4.105823  | 10.629869 |
| 6 | -3.194663 | 2.678329  | 10.629869 |
| 6 | -3.916832 | 1.427495  | 10.629869 |
| 6 | -2.676554 | -3.193991 | 9.376221  |
| 6 | -1.427800 | -3.914959 | 9.376221  |
| 6 | 1.427800  | -3.914959 | 9.376221  |
| 6 | 2.676554  | -3.193991 | 9.376221  |
| 6 | 4.104354  | -0.720969 | 9.376221  |
| 6 | 4.104354  | 0.720969  | 9.376221  |
| 6 | 2.676554  | 3.193991  | 9.376221  |
| 6 | 1.427800  | 3.914959  | 9.376221  |
| 6 | -1.427800 | 3.914959  | 9.376221  |
| 6 | -2.676554 | 3.193991  | 9.376221  |
| 6 | -4.104354 | 0.720969  | 9.376221  |
| 6 | -4.104354 | -0.720969 | 9.376221  |
| 6 | -0.724443 | -4.108561 | 8.126191  |
| 6 | 0.724443  | -4.108561 | 8.126191  |
| 6 | 3.195897  | -2.681667 | 8.126191  |
| 6 | 3.920340  | -1.426894 | 8.126191  |
| 6 | 3.920340  | 1.426894  | 8.126191  |
| 6 | 3.195897  | 2.681667  | 8.126191  |
| 6 | 0.724443  | 4.108561  | 8.126191  |
| 6 | -0.724443 | 4.108561  | 8.126191  |
| 6 | -3.195897 | 2.681667  | 8.126191  |

|   |           |           |          |
|---|-----------|-----------|----------|
| 6 | -3.920340 | 1.426894  | 8.126191 |
| 6 | -3.920340 | -1.426894 | 8.126191 |
| 6 | -3.195897 | -2.681667 | 8.126191 |
| 6 | 1.427353  | -3.917688 | 6.878838 |
| 6 | 2.679141  | -3.194968 | 6.878838 |
| 6 | 4.106494  | -0.722720 | 6.878838 |
| 6 | 4.106494  | 0.722720  | 6.878838 |
| 6 | 2.679141  | 3.194968  | 6.878838 |
| 6 | 1.427353  | 3.917688  | 6.878838 |
| 6 | -1.427353 | 3.917688  | 6.878838 |
| 6 | -2.679141 | 3.194968  | 6.878838 |
| 6 | -4.106494 | 0.722720  | 6.878838 |
| 6 | -4.106494 | -0.722720 | 6.878838 |
| 6 | -2.679141 | -3.194968 | 6.878838 |
| 6 | -1.427353 | -3.917688 | 6.878838 |
| 6 | 3.193908  | -2.676272 | 5.625721 |
| 6 | 3.914673  | -1.427870 | 5.625721 |
| 6 | 3.914673  | 1.427870  | 5.625721 |
| 6 | 3.193908  | 2.676272  | 5.625721 |
| 6 | 0.720765  | 4.104141  | 5.625721 |
| 6 | -0.720765 | 4.104141  | 5.625721 |
| 6 | -3.193908 | 2.676272  | 5.625721 |
| 6 | -3.914673 | 1.427870  | 5.625721 |
| 6 | -3.914673 | -1.427870 | 5.625721 |
| 6 | -3.193908 | -2.676272 | 5.625721 |
| 6 | -0.720765 | -4.104141 | 5.625721 |
| 6 | 0.720765  | -4.104141 | 5.625721 |
| 6 | 4.108157  | -0.724098 | 4.374805 |
| 6 | 4.108157  | 0.724098  | 4.374805 |
| 6 | 2.681166  | 3.195720  | 4.374805 |
| 6 | 1.426991  | 3.919818  | 4.374805 |
| 6 | -1.426991 | 3.919818  | 4.374805 |
| 6 | -2.681166 | 3.195720  | 4.374805 |
| 6 | -4.108157 | 0.724098  | 4.374805 |
| 6 | -4.108157 | -0.724098 | 4.374805 |
| 6 | -2.681166 | -3.195720 | 4.374805 |
| 6 | -1.426991 | -3.919818 | 4.374805 |
| 6 | 1.426991  | -3.919818 | 4.374805 |
| 6 | 2.681166  | -3.195720 | 4.374805 |
| 6 | 3.918463  | 1.427217  | 3.127723 |
| 6 | 3.195237  | 2.679880  | 3.127723 |
| 6 | 0.723226  | 4.107097  | 3.127723 |
| 6 | -0.723226 | 4.107097  | 3.127723 |
| 6 | -3.195237 | 2.679880  | 3.127723 |
| 6 | -3.918463 | 1.427217  | 3.127723 |
| 6 | -3.918463 | -1.427217 | 3.127723 |
| 6 | -3.195237 | -2.679880 | 3.127723 |
| 6 | -0.723226 | -4.107097 | 3.127723 |
| 6 | 0.723226  | -4.107097 | 3.127723 |
| 6 | 3.195237  | -2.679880 | 3.127723 |
| 6 | 3.918463  | -1.427217 | 3.127723 |
| 6 | 2.676127  | 3.193860  | 1.875241 |
| 6 | 1.427900  | 3.914524  | 1.875241 |
| 6 | -1.427900 | 3.914524  | 1.875241 |
| 6 | -2.676127 | 3.193860  | 1.875241 |
| 6 | -4.104028 | 0.720664  | 1.875241 |
| 6 | -4.104028 | -0.720664 | 1.875241 |
| 6 | -2.676127 | -3.193860 | 1.875241 |
| 6 | -1.427900 | -3.914524 | 1.875241 |
| 6 | 1.427900  | -3.914524 | 1.875241 |
| 6 | 2.676127  | -3.193860 | 1.875241 |
| 6 | 4.104028  | -0.720664 | 1.875241 |
| 6 | 4.104028  | 0.720664  | 1.875241 |
| 6 | 0.723695  | 4.107684  | 0.623497 |
| 6 | -0.723695 | 4.107684  | 0.623497 |
| 6 | -3.195511 | 2.680580  | 0.623497 |
| 6 | -3.919206 | 1.427104  | 0.623497 |
| 6 | -3.919206 | -1.427104 | 0.623497 |
| 6 | -3.195511 | -2.680580 | 0.623497 |
| 6 | -0.723695 | -4.107684 | 0.623497 |

|   |           |           |           |
|---|-----------|-----------|-----------|
| 6 | 0.723695  | -4.107684 | 0.623497  |
| 6 | 3.195511  | -2.680580 | 0.623497  |
| 6 | 3.919206  | -1.427104 | 0.623497  |
| 6 | 3.919206  | 1.427104  | 0.623497  |
| 6 | 3.195511  | 2.680580  | 0.623497  |
| 6 | -1.427104 | 3.919206  | -0.623497 |
| 6 | -2.680580 | 3.195511  | -0.623497 |
| 6 | -4.107684 | 0.723695  | -0.623497 |
| 6 | -4.107684 | -0.723695 | -0.623497 |
| 6 | -2.680580 | -3.195511 | -0.623497 |
| 6 | -1.427104 | -3.919206 | -0.623497 |
| 6 | 1.427104  | -3.919206 | -0.623497 |
| 6 | 2.680580  | -3.195511 | -0.623497 |
| 6 | 4.107684  | -0.723695 | -0.623497 |
| 6 | 4.107684  | 0.723695  | -0.623497 |
| 6 | 2.680580  | 3.195511  | -0.623497 |
| 6 | 1.427104  | 3.919206  | -0.623497 |
| 6 | -3.193860 | 2.676127  | -1.875241 |
| 6 | -3.914524 | 1.427900  | -1.875241 |
| 6 | -3.914524 | -1.427900 | -1.875241 |
| 6 | -3.193860 | -2.676127 | -1.875241 |
| 6 | -0.720664 | -4.104028 | -1.875241 |
| 6 | 0.720664  | -4.104028 | -1.875241 |
| 6 | 3.193860  | -2.676127 | -1.875241 |
| 6 | 3.914524  | -1.427900 | -1.875241 |
| 6 | 3.914524  | 1.427900  | -1.875241 |
| 6 | 3.193860  | 2.676127  | -1.875241 |
| 6 | 0.720664  | 4.104028  | -1.875241 |
| 6 | -0.720664 | 4.104028  | -1.875241 |
| 6 | -4.107097 | 0.723226  | -3.127723 |
| 6 | -4.107097 | -0.723226 | -3.127723 |
| 6 | -2.679880 | -3.195237 | -3.127723 |
| 6 | -1.427217 | -3.918463 | -3.127723 |
| 6 | 1.427217  | -3.918463 | -3.127723 |
| 6 | 2.679880  | -3.195237 | -3.127723 |
| 6 | 4.107097  | -0.723226 | -3.127723 |
| 6 | 4.107097  | 0.723226  | -3.127723 |
| 6 | 2.679880  | 3.195237  | -3.127723 |
| 6 | 1.427217  | 3.918463  | -3.127723 |
| 6 | -1.427217 | 3.918463  | -3.127723 |
| 6 | -2.679880 | 3.195237  | -3.127723 |
| 6 | -3.919818 | -1.426991 | -4.374805 |
| 6 | -3.195720 | -2.681166 | -4.374805 |
| 6 | -0.724098 | -4.108157 | -4.374805 |
| 6 | 0.724098  | -4.108157 | -4.374805 |
| 6 | 3.195720  | -2.681166 | -4.374805 |
| 6 | 3.919818  | -1.426991 | -4.374805 |
| 6 | 3.919818  | 1.426991  | -4.374805 |
| 6 | 3.195720  | 2.681166  | -4.374805 |
| 6 | 0.724098  | 4.108157  | -4.374805 |
| 6 | -0.724098 | 4.108157  | -4.374805 |
| 6 | -3.195720 | 2.681166  | -4.374805 |
| 6 | -3.919818 | 1.426991  | -4.374805 |
| 6 | -2.676272 | -3.193908 | -5.625721 |
| 6 | -1.427870 | -3.914673 | -5.625721 |
| 6 | 1.427870  | -3.914673 | -5.625721 |
| 6 | 2.676272  | -3.193908 | -5.625721 |
| 6 | 4.104141  | -0.720765 | -5.625721 |
| 6 | 4.104141  | 0.720765  | -5.625721 |
| 6 | 2.676272  | 3.193908  | -5.625721 |
| 6 | 1.427870  | 3.914673  | -5.625721 |
| 6 | -1.427870 | 3.914673  | -5.625721 |
| 6 | -2.676272 | 3.193908  | -5.625721 |
| 6 | -4.104141 | 0.720765  | -5.625721 |
| 6 | -4.104141 | -0.720765 | -5.625721 |
| 6 | -0.722720 | -4.106494 | -6.878838 |
| 6 | 0.722720  | -4.106494 | -6.878838 |
| 6 | 3.194968  | -2.679141 | -6.878838 |
| 6 | 3.917688  | -1.427353 | -6.878838 |
| 6 | 3.917688  | 1.427353  | -6.878838 |

|   |           |           |            |
|---|-----------|-----------|------------|
| 6 | 3.194968  | 2.679141  | -6.878838  |
| 6 | 0.722720  | 4.106494  | -6.878838  |
| 6 | -0.722720 | 4.106494  | -6.878838  |
| 6 | -3.194968 | 2.679141  | -6.878838  |
| 6 | -3.917688 | 1.427353  | -6.878838  |
| 6 | -3.917688 | -1.427353 | -6.878838  |
| 6 | -3.194968 | -2.679141 | -6.878838  |
| 6 | 1.426894  | -3.920340 | -8.126191  |
| 6 | 2.681667  | -3.195897 | -8.126191  |
| 6 | 4.108561  | -0.724443 | -8.126191  |
| 6 | 4.108561  | 0.724443  | -8.126191  |
| 6 | 2.681667  | 3.195897  | -8.126191  |
| 6 | 1.426894  | 3.920340  | -8.126191  |
| 6 | -1.426894 | 3.920340  | -8.126191  |
| 6 | -2.681667 | 3.195897  | -8.126191  |
| 6 | -4.108561 | 0.724443  | -8.126191  |
| 6 | -4.108561 | -0.724443 | -8.126191  |
| 6 | -2.681667 | -3.195897 | -8.126191  |
| 6 | -1.426894 | -3.920340 | -8.126191  |
| 6 | 3.193991  | -2.676554 | -9.376221  |
| 6 | 3.914959  | -1.427800 | -9.376221  |
| 6 | 3.914959  | 1.427800  | -9.376221  |
| 6 | 3.193991  | 2.676554  | -9.376221  |
| 6 | 0.720969  | 4.104354  | -9.376221  |
| 6 | -0.720969 | 4.104354  | -9.376221  |
| 6 | -3.193991 | 2.676554  | -9.376221  |
| 6 | -3.914959 | 1.427800  | -9.376221  |
| 6 | -3.914959 | -1.427800 | -9.376221  |
| 6 | -3.193991 | -2.676554 | -9.376221  |
| 6 | -0.720969 | -4.104354 | -9.376221  |
| 6 | 0.720969  | -4.104354 | -9.376221  |
| 6 | 4.105823  | -0.722169 | -10.629869 |
| 6 | 4.105823  | 0.722169  | -10.629869 |
| 6 | 2.678329  | 3.194663  | -10.629869 |
| 6 | 1.427495  | 3.916832  | -10.629869 |
| 6 | -1.427495 | 3.916832  | -10.629869 |
| 6 | -2.678329 | 3.194663  | -10.629869 |
| 6 | -4.105823 | 0.722169  | -10.629869 |
| 6 | -4.105823 | -0.722169 | -10.629869 |
| 6 | -2.678329 | -3.194663 | -10.629869 |
| 6 | -1.427495 | -3.916832 | -10.629869 |
| 6 | 1.427495  | -3.916832 | -10.629869 |
| 6 | 2.678329  | -3.194663 | -10.629869 |
| 6 | 3.920744  | 1.426812  | -11.877691 |
| 6 | 3.196028  | 2.682058  | -11.877691 |
| 6 | 0.724717  | 4.108870  | -11.877691 |
| 6 | -0.724717 | 4.108870  | -11.877691 |
| 6 | -3.196028 | 2.682058  | -11.877691 |
| 6 | -3.920744 | 1.426812  | -11.877691 |
| 6 | -3.920744 | -1.426812 | -11.877691 |
| 6 | -3.196028 | -2.682058 | -11.877691 |
| 6 | -0.724717 | -4.108870 | -11.877691 |
| 6 | 0.724717  | -4.108870 | -11.877691 |
| 6 | 3.196028  | -2.682058 | -11.877691 |
| 6 | 3.920744  | -1.426812 | -11.877691 |
| 6 | 2.676990  | 3.194123  | -13.126792 |
| 6 | 1.427696  | 3.915403  | -13.126792 |
| 6 | -1.427696 | 3.915403  | -13.126792 |
| 6 | -2.676990 | 3.194123  | -13.126792 |
| 6 | -4.104686 | 0.721280  | -13.126792 |
| 6 | -4.104686 | -0.721280 | -13.126792 |
| 6 | -2.676990 | -3.194123 | -13.126792 |
| 6 | -1.427696 | -3.915403 | -13.126792 |
| 6 | 1.427696  | -3.915403 | -13.126792 |
| 6 | 2.676990  | -3.194123 | -13.126792 |
| 6 | 4.104686  | -0.721280 | -13.126792 |
| 6 | 4.104686  | 0.721280  | -13.126792 |
| 6 | 0.721585  | 4.105110  | -14.380864 |
| 6 | -0.721585 | 4.105110  | -14.380864 |
| 6 | -3.194337 | 2.677466  | -14.380864 |

|   |           |           |            |
|---|-----------|-----------|------------|
| 6 | -3.915922 | 1.427644  | -14.380864 |
| 6 | -3.915922 | -1.427644 | -14.380864 |
| 6 | -3.194337 | -2.677466 | -14.380864 |
| 6 | -0.721585 | -4.105110 | -14.380864 |
| 6 | 0.721585  | -4.105110 | -14.380864 |
| 6 | 3.194337  | -2.677466 | -14.380864 |
| 6 | 3.915922  | -1.427644 | -14.380864 |
| 6 | 3.915922  | 1.427644  | -14.380864 |
| 6 | 3.194337  | 2.677466  | -14.380864 |
| 6 | -1.426751 | 3.921039  | -15.629378 |
| 6 | -2.682344 | 3.196122  | -15.629378 |
| 6 | -4.109095 | 0.724917  | -15.629378 |
| 6 | -4.109095 | -0.724917 | -15.629378 |
| 6 | -2.682344 | -3.196122 | -15.629378 |
| 6 | -1.426751 | -3.921039 | -15.629378 |
| 6 | 1.426751  | -3.921039 | -15.629378 |
| 6 | 2.682344  | -3.196122 | -15.629378 |
| 6 | 4.109095  | -0.724917 | -15.629378 |
| 6 | 4.109095  | 0.724917  | -15.629378 |
| 6 | 2.682344  | 3.196122  | -15.629378 |
| 6 | 1.426751  | 3.921039  | -15.629378 |
| 6 | -3.194322 | 2.677604  | -16.877503 |
| 6 | -3.916034 | 1.427562  | -16.877503 |
| 6 | -3.916034 | -1.427562 | -16.877503 |
| 6 | -3.194322 | -2.677604 | -16.877503 |
| 6 | -0.721712 | -4.105166 | -16.877503 |
| 6 | 0.721712  | -4.105166 | -16.877503 |
| 6 | 3.194322  | -2.677604 | -16.877503 |
| 6 | 3.916034  | -1.427562 | -16.877503 |
| 6 | 3.916034  | 1.427562  | -16.877503 |
| 6 | 3.194322  | 2.677604  | -16.877503 |
| 6 | 0.721712  | 4.105166  | -16.877503 |
| 6 | -0.721712 | 4.105166  | -16.877503 |
| 6 | -4.104342 | 0.720948  | -18.131845 |
| 6 | -4.104342 | -0.720948 | -18.131845 |
| 6 | -2.676530 | -3.193990 | -18.131845 |
| 6 | -1.427812 | -3.914938 | -18.131845 |
| 6 | 1.427812  | -3.914938 | -18.131845 |
| 6 | 2.676530  | -3.193990 | -18.131845 |
| 6 | 4.104342  | -0.720948 | -18.131845 |
| 6 | 4.104342  | 0.720948  | -18.131845 |
| 6 | 2.676530  | 3.193990  | -18.131845 |
| 6 | 1.427812  | 3.914938  | -18.131845 |
| 6 | -1.427812 | 3.914938  | -18.131845 |
| 6 | -2.676530 | 3.193990  | -18.131845 |
| 6 | -3.921187 | -1.426697 | -19.381271 |
| 6 | -3.196150 | -2.682499 | -19.381271 |
| 6 | -0.725037 | -4.109196 | -19.381271 |
| 6 | 0.725037  | -4.109196 | -19.381271 |
| 6 | 3.196150  | -2.682499 | -19.381271 |
| 6 | 3.921187  | -1.426697 | -19.381271 |
| 6 | 3.921187  | 1.426697  | -19.381271 |
| 6 | 3.196150  | 2.682499  | -19.381271 |
| 6 | 0.725037  | 4.109196  | -19.381271 |
| 6 | -0.725037 | 4.109196  | -19.381271 |
| 6 | -3.196150 | 2.682499  | -19.381271 |
| 6 | -3.921187 | 1.426697  | -19.381271 |
| 6 | -2.678410 | -3.194593 | -20.628278 |
| 6 | -1.427393 | -3.916867 | -20.628278 |
| 6 | 1.427393  | -3.916867 | -20.628278 |
| 6 | 2.678410  | -3.194593 | -20.628278 |
| 6 | 4.105803  | -0.722275 | -20.628278 |
| 6 | 4.105803  | 0.722275  | -20.628278 |
| 6 | 2.678410  | 3.194593  | -20.628278 |
| 6 | 1.427393  | 3.916867  | -20.628278 |
| 6 | -1.427393 | 3.916867  | -20.628278 |
| 6 | -2.678410 | 3.194593  | -20.628278 |
| 6 | -4.105803 | 0.722275  | -20.628278 |
| 6 | -4.105803 | -0.722275 | -20.628278 |
| 6 | -0.720229 | -4.103444 | -21.882674 |

|   |           |           |            |
|---|-----------|-----------|------------|
| 6 | 0.720229  | -4.103444 | -21.882674 |
| 6 | 3.193572  | -2.675459 | -21.882674 |
| 6 | 3.913801  | -1.427986 | -21.882674 |
| 6 | 3.913801  | 1.427986  | -21.882674 |
| 6 | 3.193572  | 2.675459  | -21.882674 |
| 6 | 0.720229  | 4.103444  | -21.882674 |
| 6 | -0.720229 | 4.103444  | -21.882674 |
| 6 | -3.193572 | 2.675459  | -21.882674 |
| 6 | -3.913801 | 1.427986  | -21.882674 |
| 6 | -3.913801 | -1.427986 | -21.882674 |
| 6 | -3.193572 | -2.675459 | -21.882674 |
| 6 | 1.426781  | -3.921470 | -23.133349 |
| 6 | 2.682702  | -3.196364 | -23.133349 |
| 6 | 4.109483  | -0.725106 | -23.133349 |
| 6 | 4.109483  | 0.725106  | -23.133349 |
| 6 | 2.682702  | 3.196364  | -23.133349 |
| 6 | 1.426781  | 3.921470  | -23.133349 |
| 6 | -1.426781 | 3.921470  | -23.133349 |
| 6 | -2.682702 | 3.196364  | -23.133349 |
| 6 | -4.109483 | 0.725106  | -23.133349 |
| 6 | -4.109483 | -0.725106 | -23.133349 |
| 6 | -2.682702 | -3.196364 | -23.133349 |
| 6 | -1.426781 | -3.921470 | -23.133349 |
| 6 | 3.195469  | -2.680000 | -24.378927 |
| 6 | 3.918682  | -1.427358 | -24.378927 |
| 6 | 3.918682  | 1.427358  | -24.378927 |
| 6 | 3.195469  | 2.680000  | -24.378927 |
| 6 | 0.723213  | 4.107357  | -24.378927 |
| 6 | -0.723213 | 4.107357  | -24.378927 |
| 6 | -3.195469 | 2.680000  | -24.378927 |
| 6 | -3.918682 | 1.427358  | -24.378927 |
| 6 | -3.918682 | -1.427358 | -24.378927 |
| 6 | -3.195469 | -2.680000 | -24.378927 |
| 6 | -0.723213 | -4.107357 | -24.378927 |
| 6 | 0.723213  | -4.107357 | -24.378927 |
| 6 | 4.102849  | -0.719196 | -25.633028 |
| 6 | 4.102849  | 0.719196  | -25.633028 |
| 6 | 2.674267  | 3.193574  | -25.633028 |
| 6 | 1.428583  | 3.912770  | -25.633028 |
| 6 | -1.428583 | 3.912770  | -25.633028 |
| 6 | -2.674267 | 3.193574  | -25.633028 |
| 6 | -4.102849 | 0.719196  | -25.633028 |
| 6 | -4.102849 | -0.719196 | -25.633028 |
| 6 | -2.674267 | -3.193574 | -25.633028 |
| 6 | -1.428583 | -3.912770 | -25.633028 |
| 6 | 1.428583  | -3.912770 | -25.633028 |
| 6 | 2.674267  | -3.193574 | -25.633028 |
| 6 | 3.920445  | 1.426435  | -26.885828 |
| 6 | 3.195552  | 2.681988  | -26.885828 |
| 6 | 0.724894  | 4.108423  | -26.885828 |
| 6 | -0.724894 | 4.108423  | -26.885828 |
| 6 | -3.195552 | 2.681988  | -26.885828 |
| 6 | -3.920445 | 1.426435  | -26.885828 |
| 6 | -3.920445 | -1.426435 | -26.885828 |
| 6 | -3.195552 | -2.681988 | -26.885828 |
| 6 | -0.724894 | -4.108423 | -26.885828 |
| 6 | 0.724894  | -4.108423 | -26.885828 |
| 6 | 3.195552  | -2.681988 | -26.885828 |
| 6 | 3.920445  | -1.426435 | -26.885828 |
| 6 | 2.678524  | 3.191470  | -28.129312 |
| 6 | 1.424632  | 3.915405  | -28.129312 |
| 6 | -1.424632 | 3.915405  | -28.129312 |
| 6 | -2.678524 | 3.191470  | -28.129312 |
| 6 | -4.103156 | 0.723935  | -28.129312 |
| 6 | -4.103156 | -0.723935 | -28.129312 |
| 6 | -2.678524 | -3.191470 | -28.129312 |
| 6 | -1.424632 | -3.915405 | -28.129312 |
| 6 | 1.424632  | -3.915405 | -28.129312 |
| 6 | 2.678524  | -3.191470 | -28.129312 |
| 6 | 4.103156  | -0.723935 | -28.129312 |

|   |           |           |            |
|---|-----------|-----------|------------|
| 6 | 4.103156  | 0.723935  | -28.129312 |
| 6 | 0.715232  | 4.086969  | -29.383065 |
| 6 | -0.715232 | 4.086969  | -29.383065 |
| 6 | -3.181803 | 2.662894  | -29.383065 |
| 6 | -3.897036 | 1.424075  | -29.383065 |
| 6 | -3.897036 | -1.424075 | -29.383065 |
| 6 | -3.181803 | -2.662894 | -29.383065 |
| 6 | -0.715232 | -4.086969 | -29.383065 |
| 6 | 0.715232  | -4.086969 | -29.383065 |
| 6 | 3.181803  | -2.662894 | -29.383065 |
| 6 | 3.897036  | -1.424075 | -29.383065 |
| 6 | 3.897036  | 1.424075  | -29.383065 |
| 6 | 3.181803  | 2.662894  | -29.383065 |
| 6 | -1.420111 | 3.911425  | -30.644366 |
| 6 | -2.677338 | 3.185565  | -30.644366 |
| 6 | -4.097449 | 0.725861  | -30.644366 |
| 6 | -4.097449 | -0.725861 | -30.644366 |
| 6 | -2.677338 | -3.185565 | -30.644366 |
| 6 | -1.420111 | -3.911425 | -30.644366 |
| 6 | 1.420111  | -3.911425 | -30.644366 |
| 6 | 2.677338  | -3.185565 | -30.644366 |
| 6 | 4.097449  | -0.725861 | -30.644366 |
| 6 | 4.097449  | 0.725861  | -30.644366 |
| 6 | 2.677338  | 3.185565  | -30.644366 |
| 6 | 1.420111  | 3.911425  | -30.644366 |
| 6 | -3.223875 | 2.709772  | -31.884683 |
| 6 | -3.958669 | 1.437072  | -31.884683 |
| 6 | -3.958669 | -1.437072 | -31.884683 |
| 6 | -3.223875 | -2.709772 | -31.884683 |
| 6 | -0.734794 | -4.146844 | -31.884683 |
| 6 | 0.734794  | -4.146844 | -31.884683 |
| 6 | 3.223875  | -2.709772 | -31.884683 |
| 6 | 3.958669  | -1.437072 | -31.884683 |
| 6 | 3.958669  | 1.437072  | -31.884683 |
| 6 | 3.223875  | 2.709772  | -31.884683 |
| 6 | 0.734794  | 4.146844  | -31.884683 |
| 6 | -0.734794 | 4.146844  | -31.884683 |
| 6 | -4.211982 | 0.691997  | -33.099994 |
| 6 | -4.211982 | -0.691997 | -33.099994 |
| 6 | -2.705278 | -3.301685 | -33.099994 |
| 6 | -1.506704 | -3.993682 | -33.099994 |
| 6 | 1.506704  | -3.993682 | -33.099994 |
| 6 | 2.705278  | -3.301685 | -33.099994 |
| 6 | 4.211982  | -0.691997 | -33.099994 |
| 6 | 4.211982  | 0.691997  | -33.099994 |
| 6 | 2.705278  | 3.301685  | -33.099994 |
| 6 | 1.506704  | 3.993682  | -33.099994 |
| 6 | -1.506704 | 3.993682  | -33.099994 |
| 6 | -2.705278 | 3.301685  | -33.099994 |
| 1 | 4.316497  | 1.075383  | 34.056471  |
| 1 | 3.089558  | 3.200504  | 34.056471  |
| 1 | 1.226939  | 4.275888  | 34.056471  |
| 1 | -1.226939 | 4.275888  | 34.056471  |
| 1 | -3.089558 | 3.200504  | 34.056471  |
| 1 | -4.316497 | 1.075383  | 34.056471  |
| 1 | -4.316497 | -1.075383 | 34.056471  |
| 1 | -3.089558 | -3.200504 | 34.056471  |
| 1 | -1.226939 | -4.275888 | 34.056471  |
| 1 | 1.226939  | -4.275888 | 34.056471  |
| 1 | 3.089558  | -3.200504 | 34.056471  |
| 1 | 4.316497  | -1.075383 | 34.056471  |
| 1 | 1.075383  | -4.316497 | -34.056471 |
| 1 | 3.200504  | -3.089558 | -34.056471 |
| 1 | -1.075383 | -4.316497 | -34.056471 |
| 1 | -3.200504 | -3.089558 | -34.056471 |
| 1 | -4.275888 | -1.226939 | -34.056471 |
| 1 | -4.275888 | 1.226939  | -34.056471 |
| 1 | -3.200504 | 3.089558  | -34.056471 |
| 1 | -1.075383 | 4.316497  | -34.056471 |
| 1 | 1.075383  | 4.316497  | -34.056471 |

|   |          |           |            |
|---|----------|-----------|------------|
| 1 | 3.200504 | 3.089558  | -34.056471 |
| 1 | 4.275888 | 1.226939  | -34.056471 |
| 1 | 4.275888 | -1.226939 | -34.056471 |

Nanotube (6,6) u27v6s  
B3LYP/STO-3G Energy: -24861.632294

|   |             |             |             |
|---|-------------|-------------|-------------|
| C | -3.89518327 | 1.76174298  | 33.70938320 |
| C | -4.25419916 | 0.42187746  | 33.70938320 |
| C | -3.47330581 | -2.49245618 | 33.70938320 |
| C | -2.49245618 | -3.47330581 | 33.70938320 |
| C | 0.42187746  | -4.25419916 | 33.70938320 |
| C | 1.76174298  | -3.89518327 | 33.70938320 |
| C | 3.89518327  | -1.76174298 | 33.70938320 |
| C | 4.25419916  | -0.42187746 | 33.70938320 |
| C | 3.47330581  | 2.49245618  | 33.70938320 |
| C | 2.49245618  | 3.47330581  | 33.70938320 |
| C | -0.42187746 | 4.25419916  | 33.70938320 |
| C | -1.76174298 | 3.89518327  | 33.70938320 |
| C | -4.20232621 | -0.36271041 | 32.49716589 |
| C | -3.82067646 | -1.78704668 | 32.49716589 |
| C | -1.78704668 | -3.82067646 | 32.49716589 |
| C | -0.36271041 | -4.20232621 | 32.49716589 |
| C | 2.41527954  | -3.45796605 | 32.49716589 |
| C | 3.45796605  | -2.41527954 | 32.49716589 |
| C | 4.20232621  | 0.36271041  | 32.49716589 |
| C | 3.82067646  | 1.78704668  | 32.49716589 |
| C | 1.78704668  | 3.82067646  | 32.49716589 |
| C | 0.36271041  | 4.20232621  | 32.49716589 |
| C | -2.41527954 | 3.45796605  | 32.49716589 |
| C | -3.45796605 | 2.41527954  | 32.49716589 |
| C | -3.40974955 | -2.38383045 | 31.25689823 |
| C | -2.38383045 | -3.40974955 | 31.25689823 |
| C | 0.35958296  | -4.14484495 | 31.25689823 |
| C | 1.76101450  | -3.76933250 | 31.25689823 |
| C | 3.76933250  | -1.76101450 | 31.25689823 |
| C | 4.14484495  | -0.35958296 | 31.25689823 |
| C | 3.40974955  | 2.38383045  | 31.25689823 |
| C | 2.38383045  | 3.40974955  | 31.25689823 |
| C | -0.35958296 | 4.14484495  | 31.25689823 |
| C | -1.76101450 | 3.76933250  | 31.25689823 |
| C | -3.76933250 | 1.76101450  | 31.25689823 |
| C | -4.14484495 | 0.35958296  | 31.25689823 |
| C | -1.74995429 | -3.76376792 | 29.99364859 |
| C | -0.36637909 | -4.13449578 | 29.99364859 |
| C | 2.38454149  | -3.39738883 | 29.99364859 |
| C | 3.39738883  | -2.38454149 | 29.99364859 |
| C | 4.13449578  | 0.36637909  | 29.99364859 |
| C | 3.76376792  | 1.74995429  | 29.99364859 |
| C | 1.74995429  | 3.76376792  | 29.99364859 |
| C | 0.36637909  | 4.13449578  | 29.99364859 |
| C | -2.38454149 | 3.39738883  | 29.99364859 |
| C | -3.39738883 | 2.38454149  | 29.99364859 |
| C | -4.13449578 | -0.36637909 | 29.99364859 |
| C | -3.76376792 | -1.74995429 | 29.99364859 |
| C | 0.36151137  | -4.15447852 | 28.74308610 |
| C | 1.76416123  | -3.77863962 | 28.74308610 |
| C | 3.77863962  | -1.76416123 | 28.74308610 |
| C | 4.15447852  | -0.36151137 | 28.74308610 |
| C | 3.41712825  | 2.39031729  | 28.74308610 |
| C | 2.39031729  | 3.41712825  | 28.74308610 |
| C | -0.36151137 | 4.15447852  | 28.74308610 |
| C | -1.76416123 | 3.77863962  | 28.74308610 |
| C | -3.77863962 | 1.76416123  | 28.74308610 |
| C | -4.15447852 | 0.36151137  | 28.74308610 |
| C | -3.41712825 | -2.39031729 | 28.74308610 |
| C | -2.39031729 | -3.41712825 | 28.74308610 |
| C | 2.39250859  | -3.41651551 | 27.49975172 |



|   |             |             |             |
|---|-------------|-------------|-------------|
| C | 3.41651551  | -2.39250859 | 27.49975172 |
| C | 4.15504352  | 0.36371547  | 27.49975172 |
| C | 3.78023097  | 1.76253492  | 27.49975172 |
| C | 1.76253492  | 3.78023097  | 27.49975172 |
| C | 0.36371547  | 4.15504352  | 27.49975172 |
| C | -2.39250859 | 3.41651551  | 27.49975172 |
| C | -3.41651551 | 2.39250859  | 27.49975172 |
| C | -4.15504352 | -0.36371547 | 27.49975172 |
| C | -3.78023097 | -1.76253492 | 27.49975172 |
| C | -1.76253492 | -3.78023097 | 27.49975172 |
| C | -0.36371547 | -4.15504352 | 27.49975172 |
| C | 3.77847416  | -1.75782710 | 26.24468600 |
| C | 4.15116816  | -0.36691416 | 26.24468600 |
| C | 3.41156000  | 2.39334107  | 26.24468600 |
| C | 2.39334107  | 3.41156000  | 26.24468600 |
| C | -0.36691416 | 4.15116816  | 26.24468600 |
| C | -1.75782710 | 3.77847416  | 26.24468600 |
| C | -3.77847416 | 1.75782710  | 26.24468600 |
| C | -4.15116816 | 0.36691416  | 26.24468600 |
| C | -3.41156000 | -2.39334107 | 26.24468600 |
| C | -2.39334107 | -3.41156000 | 26.24468600 |
| C | 0.36691416  | -4.15116816 | 26.24468600 |
| C | 1.75782710  | -3.77847416 | 26.24468600 |
| C | 4.15859517  | 0.36291419  | 24.99370087 |
| C | 3.78290616  | 1.76500468  | 24.99370087 |
| C | 1.76500468  | 3.78290616  | 24.99370087 |
| C | 0.36291419  | 4.15859517  | 24.99370087 |
| C | -2.39359050 | 3.41999197  | 24.99370087 |
| C | -3.41999197 | 2.39359050  | 24.99370087 |
| C | -4.15859517 | -0.36291419 | 24.99370087 |
| C | -3.78290616 | -1.76500468 | 24.99370087 |
| C | -1.76500468 | -3.78290616 | 24.99370087 |
| C | -0.36291419 | -4.15859517 | 24.99370087 |
| C | 2.39359050  | -3.41999197 | 24.99370087 |
| C | 3.41999197  | -2.39359050 | 24.99370087 |
| C | 3.41770991  | 2.39344242  | 23.74872700 |
| C | 2.39344242  | 3.41770991  | 23.74872700 |
| C | -0.36392698 | 4.15654481  | 23.74872700 |
| C | -1.76310239 | 3.78163689  | 23.74872700 |
| C | -3.78163689 | 1.76310239  | 23.74872700 |
| C | -4.15654481 | 0.36392698  | 23.74872700 |
| C | -3.41770991 | -2.39344242 | 23.74872700 |
| C | -2.39344242 | -3.41770991 | 23.74872700 |
| C | 0.36392698  | -4.15654481 | 23.74872700 |
| C | 1.76310239  | -3.78163689 | 23.74872700 |
| C | 3.78163689  | -1.76310239 | 23.74872700 |
| C | 4.15654481  | -0.36392698 | 23.74872700 |
| C | 1.75866799  | 3.77846300  | 22.49529200 |
| C | 0.36618034  | 4.15157894  | 22.49529200 |
| C | -2.39291095 | 3.41228266  | 22.49529200 |
| C | -3.41228266 | 2.39291095  | 22.49529200 |
| C | -4.15157894 | -0.36618034 | 22.49529200 |
| C | -3.77846300 | -1.75866799 | 22.49529200 |
| C | -1.75866799 | -3.77846300 | 22.49529200 |
| C | -0.36618034 | -4.15157894 | 22.49529200 |
| C | 2.39291095  | -3.41228266 | 22.49529200 |
| C | 3.41228266  | -2.39291095 | 22.49529200 |
| C | 4.15157894  | 0.36618034  | 22.49529200 |
| C | 3.77846300  | 1.75866799  | 22.49529200 |
| C | -0.36326965 | 4.15742824  | 21.24411807 |
| C | -1.76411338 | 3.78207330  | 21.24411807 |
| C | -3.78207330 | 1.76411338  | 21.24411807 |
| C | -4.15742824 | 0.36326965  | 21.24411807 |
| C | -3.41880365 | -2.39331486 | 21.24411807 |
| C | -2.39331486 | -3.41880365 | 21.24411807 |
| C | 0.36326965  | -4.15742824 | 21.24411807 |
| C | 1.76411338  | -3.78207330 | 21.24411807 |
| C | 3.78207330  | -1.76411338 | 21.24411807 |
| C | 4.15742824  | -0.36326965 | 21.24411807 |
| C | 3.41880365  | 2.39331486  | 21.24411807 |

|   |             |             |             |
|---|-------------|-------------|-------------|
| C | 2.39331486  | 3.41880365  | 21.24411807 |
| C | -2.39364497 | 3.41786684  | 19.99861465 |
| C | -3.41786684 | 2.39364497  | 19.99861465 |
| C | -4.15678200 | -0.36402393 | 19.99861465 |
| C | -3.78189077 | -1.76313703 | 19.99861465 |
| C | -1.76313703 | -3.78189077 | 19.99861465 |
| C | -0.36402393 | -4.15678200 | 19.99861465 |
| C | 2.39364497  | -3.41786684 | 19.99861465 |
| C | 3.41786684  | -2.39364497 | 19.99861465 |
| C | 4.15678200  | 0.36402393  | 19.99861465 |
| C | 3.78189077  | 1.76313703  | 19.99861465 |
| C | 1.76313703  | 3.78189077  | 19.99861465 |
| C | 0.36402393  | 4.15678200  | 19.99861465 |
| C | -3.77941781 | 1.75930712  | 18.74618187 |
| C | -4.15272539 | 0.36610424  | 18.74618187 |
| C | -3.41331357 | -2.39341827 | 18.74618187 |
| C | -2.39341827 | -3.41331357 | 18.74618187 |
| C | 0.36610424  | -4.15272539 | 18.74618187 |
| C | 1.75930712  | -3.77941781 | 18.74618187 |
| C | 3.77941781  | -1.75930712 | 18.74618187 |
| C | 4.15272539  | -0.36610424 | 18.74618187 |
| C | 3.41331357  | 2.39341827  | 18.74618187 |
| C | 2.39341827  | 3.41331357  | 18.74618187 |
| C | -0.36610424 | 4.15272539  | 18.74618187 |
| C | -1.75930712 | 3.77941781  | 18.74618187 |
| C | -4.15781670 | -0.36367278 | 17.49533068 |
| C | -3.78261127 | -1.76395848 | 17.49533068 |
| C | -1.76395848 | -3.78261127 | 17.49533068 |
| C | -0.36367278 | -4.15781670 | 17.49533068 |
| C | 2.39385822  | -3.41893849 | 17.49533068 |
| C | 3.41893849  | -2.39385822 | 17.49533068 |
| C | 4.15781670  | 0.36367278  | 17.49533068 |
| C | 3.78261127  | 1.76395848  | 17.49533068 |
| C | 1.76395848  | 3.78261127  | 17.49533068 |
| C | 0.36367278  | 4.15781670  | 17.49533068 |
| C | -2.39385822 | 3.41893849  | 17.49533068 |
| C | -3.41893849 | 2.39385822  | 17.49533068 |
| C | -3.41804750 | -2.39390057 | 16.24975013 |
| C | -2.39390057 | -3.41804750 | 16.24975013 |
| C | 0.36415496  | -4.15706625 | 16.24975013 |
| C | 1.76316568  | -3.78220246 | 16.24975013 |
| C | 3.78220246  | -1.76316568 | 16.24975013 |
| C | 4.15706625  | -0.36415496 | 16.24975013 |
| C | 3.41804750  | 2.39390057  | 16.24975013 |
| C | 2.39390057  | 3.41804750  | 16.24975013 |
| C | -0.36415496 | 4.15706625  | 16.24975013 |
| C | -1.76316568 | 3.78220246  | 16.24975013 |
| C | -3.78220246 | 1.76316568  | 16.24975013 |
| C | -4.15706625 | 0.36415496  | 16.24975013 |
| C | -1.75948186 | -3.77950327 | 14.99794591 |
| C | -0.36599565 | -4.15288678 | 14.99794591 |
| C | 2.39340492  | -3.41350762 | 14.99794591 |
| C | 3.41350762  | -2.39340492 | 14.99794591 |
| C | 4.15288678  | 0.36599565  | 14.99794591 |
| C | 3.77950327  | 1.75948186  | 14.99794591 |
| C | 1.75948186  | 3.77950327  | 14.99794591 |
| C | 0.36599565  | 4.15288678  | 14.99794591 |
| C | -2.39340492 | 3.41350762  | 14.99794591 |
| C | -3.41350762 | 2.39340492  | 14.99794591 |
| C | -4.15288678 | -0.36599565 | 14.99794591 |
| C | -3.77950327 | -1.75948186 | 14.99794591 |
| C | 0.36373762  | -4.15767948 | 13.74724234 |
| C | 1.76383372  | -3.78252486 | 13.74724234 |
| C | 3.78252486  | -1.76383372 | 13.74724234 |
| C | 4.15767948  | -0.36373762 | 13.74724234 |
| C | 3.41878724  | 2.39384575  | 13.74724234 |
| C | 2.39384575  | 3.41878724  | 13.74724234 |
| C | -0.36373762 | 4.15767948  | 13.74724234 |
| C | -1.76383372 | 3.78252486  | 13.74724234 |
| C | -3.78252486 | 1.76383372  | 13.74724234 |

|   |             |             |             |
|---|-------------|-------------|-------------|
| C | -4.15767948 | 0.36373762  | 13.74724234 |
| C | -3.41878724 | -2.39384575 | 13.74724234 |
| C | -2.39384575 | -3.41878724 | 13.74724234 |
| C | 2.39392950  | -3.41818851 | 12.50148852 |
| C | 3.41818851  | -2.39392950 | 12.50148852 |
| C | 4.15720283  | 0.36410951  | 12.50148852 |
| C | 3.78229802  | 1.76327333  | 12.50148852 |
| C | 1.76327333  | 3.78229802  | 12.50148852 |
| C | 0.36410951  | 4.15720283  | 12.50148852 |
| C | -2.39392950 | 3.41818851  | 12.50148852 |
| C | -3.41818851 | 2.39392950  | 12.50148852 |
| C | -4.15720283 | -0.36410951 | 12.50148852 |
| C | -3.78229802 | -1.76327333 | 12.50148852 |
| C | -1.76327333 | -3.78229802 | 12.50148852 |
| C | -0.36410951 | -4.15720283 | 12.50148852 |
| C | 3.77948991  | -1.75965536 | 11.24987485 |
| C | 4.15296196  | -0.36583871 | 11.24987485 |
| C | 3.41365120  | 2.39330660  | 11.24987485 |
| C | 2.39330660  | 3.41365120  | 11.24987485 |
| C | -0.36583871 | 4.15296196  | 11.24987485 |
| C | -1.75965536 | 3.77948991  | 11.24987485 |
| C | -3.77948991 | 1.75965536  | 11.24987485 |
| C | -4.15296196 | 0.36583871  | 11.24987485 |
| C | -3.41365120 | -2.39330660 | 11.24987485 |
| C | -2.39330660 | -3.41365120 | 11.24987485 |
| C | 0.36583871  | -4.15296196 | 11.24987485 |
| C | 1.75965536  | -3.77948991 | 11.24987485 |
| C | 4.15716658  | 0.36372683  | 9.99886964  |
| C | 3.78207529  | 1.76358662  | 9.99886964  |
| C | 1.76358662  | 3.78207529  | 9.99886964  |
| C | 0.36372683  | 4.15716658  | 9.99886964  |
| C | -2.39357997 | 3.41834845  | 9.99886964  |
| C | -3.41834845 | 2.39357997  | 9.99886964  |
| C | -4.15716658 | -0.36372683 | 9.99886964  |
| C | -3.78207529 | -1.76358662 | 9.99886964  |
| C | -1.76358662 | -3.78207529 | 9.99886964  |
| C | -0.36372683 | -4.15716658 | 9.99886964  |
| C | 2.39357997  | -3.41834845 | 9.99886964  |
| C | 3.41834845  | -2.39357997 | 9.99886964  |
| C | 3.41780124  | 2.39357870  | 8.75256608  |
| C | 2.39357870  | 3.41780124  | 8.75256608  |
| C | -0.36399934 | 4.15669205  | 8.75256608  |
| C | -1.76311335 | 3.78180058  | 8.75256608  |
| C | -3.78180058 | 1.76311335  | 8.75256608  |
| C | -4.15669205 | 0.36399934  | 8.75256608  |
| C | -3.41780124 | -2.39357870 | 8.75256608  |
| C | -2.39357870 | -3.41780124 | 8.75256608  |
| C | 0.36399934  | -4.15669205 | 8.75256608  |
| C | 1.76311335  | -3.78180058 | 8.75256608  |
| C | 3.78180058  | -1.76311335 | 8.75256608  |
| C | 4.15669205  | -0.36399934 | 8.75256608  |
| C | 1.75953727  | 3.77904929  | 7.50066828  |
| C | 0.36572067  | 4.15252133  | 7.50066828  |
| C | -2.39298405 | 3.41332863  | 7.50066828  |
| C | -3.41332863 | 2.39298405  | 7.50066828  |
| C | -4.15252133 | -0.36572067 | 7.50066828  |
| C | -3.77904929 | -1.75953727 | 7.50066828  |
| C | -1.75953727 | -3.77904929 | 7.50066828  |
| C | -0.36572067 | -4.15252133 | 7.50066828  |
| C | 2.39298405  | -3.41332863 | 7.50066828  |
| C | 3.41332863  | -2.39298405 | 7.50066828  |
| C | 4.15252133  | 0.36572067  | 7.50066828  |
| C | 3.77904929  | 1.75953727  | 7.50066828  |
| C | -0.36368991 | 4.15645097  | 6.24914337  |
| C | -1.76326079 | 3.78143708  | 6.24914337  |
| C | -3.78143708 | 1.76326079  | 6.24914337  |
| C | -4.15645097 | 0.36368991  | 6.24914337  |
| C | -3.41774717 | -2.39319018 | 6.24914337  |
| C | -2.39319018 | -3.41774717 | 6.24914337  |
| C | 0.36368991  | -4.15645097 | 6.24914337  |

|   |             |             |             |
|---|-------------|-------------|-------------|
| C | 1.76326079  | -3.78143708 | 6.24914337  |
| C | 3.78143708  | -1.76326079 | 6.24914337  |
| C | 4.15645097  | -0.36368991 | 6.24914337  |
| C | 3.41774717  | 2.39319018  | 6.24914337  |
| C | 2.39319018  | 3.41774717  | 6.24914337  |
| C | -2.39308075 | 3.41730238  | 5.00234827  |
| C | -3.41730238 | 2.39308075  | 5.00234827  |
| C | -4.15601105 | -0.36381753 | 5.00234827  |
| C | -3.78111991 | -1.76293030 | 5.00234827  |
| C | -1.76293030 | -3.78111991 | 5.00234827  |
| C | -0.36381753 | -4.15601105 | 5.00234827  |
| C | 2.39308075  | -3.41730238 | 5.00234827  |
| C | 3.41730238  | -2.39308075 | 5.00234827  |
| C | 4.15601105  | 0.36381753  | 5.00234827  |
| C | 3.78111991  | 1.76293030  | 5.00234827  |
| C | 1.76293030  | 3.78111991  | 5.00234827  |
| C | 0.36381753  | 4.15601105  | 5.00234827  |
| C | -3.77837907 | 1.75934715  | 3.75034809  |
| C | -4.15184583 | 0.36555021  | 3.75034809  |
| C | -3.41282886 | -2.39249869 | 3.75034809  |
| C | -2.39249869 | -3.41282886 | 3.75034809  |
| C | 0.36555021  | -4.15184583 | 3.75034809  |
| C | 1.75934715  | -3.77837907 | 3.75034809  |
| C | 3.77837907  | -1.75934715 | 3.75034809  |
| C | 4.15184583  | -0.36555021 | 3.75034809  |
| C | 3.41282886  | 2.39249869  | 3.75034809  |
| C | 2.39249869  | 3.41282886  | 3.75034809  |
| C | -0.36555021 | 4.15184583  | 3.75034809  |
| C | -1.75934715 | 3.77837907  | 3.75034809  |
| C | -4.15572296 | -0.36363770 | 2.49862406  |
| C | -3.78078050 | -1.76294199 | 2.49862406  |
| C | -1.76294199 | -3.78078050 | 2.49862406  |
| C | -0.36363770 | -4.15572296 | 2.49862406  |
| C | 2.39278097  | -3.41714280 | 2.49862406  |
| C | 3.41714280  | -2.39278097 | 2.49862406  |
| C | 4.15572296  | 0.36363770  | 2.49862406  |
| C | 3.78078050  | 1.76294199  | 2.49862406  |
| C | 1.76294199  | 3.78078050  | 2.49862406  |
| C | 0.36363770  | 4.15572296  | 2.49862406  |
| C | -2.39278097 | 3.41714280  | 2.49862406  |
| C | -3.41714280 | 2.39278097  | 2.49862406  |
| C | -3.41695761 | -2.39272955 | 1.25178659  |
| C | -2.39272955 | -3.41695761 | 1.25178659  |
| C | 0.36368577  | -4.15553687 | 1.25178659  |
| C | 1.76280732  | -3.78064338 | 1.25178659  |
| C | 3.78064338  | -1.76280732 | 1.25178659  |
| C | 4.15553687  | -0.36368577 | 1.25178659  |
| C | 3.41695761  | 2.39272955  | 1.25178659  |
| C | 2.39272955  | 3.41695761  | 1.25178659  |
| C | -0.36368577 | 4.15553687  | 1.25178659  |
| C | -1.76280732 | 3.78064338  | 1.25178659  |
| C | -3.78064338 | 1.76280732  | 1.25178659  |
| C | -4.15553687 | 0.36368577  | 1.25178659  |
| C | -1.75921349 | -3.77805490 | 0.00000000  |
| C | -0.36550388 | -4.15149826 | 0.00000000  |
| C | 2.39228477  | -3.41255102 | 0.00000000  |
| C | 3.41255102  | -2.39228477 | 0.00000000  |
| C | 4.15149826  | 0.36550388  | 0.00000000  |
| C | 3.77805490  | 1.75921349  | 0.00000000  |
| C | 1.75921349  | 3.77805490  | 0.00000000  |
| C | 0.36550388  | 4.15149826  | 0.00000000  |
| C | -2.39228477 | 3.41255102  | 0.00000000  |
| C | -3.41255102 | 2.39228477  | 0.00000000  |
| C | -4.15149826 | -0.36550388 | 0.00000000  |
| C | -3.77805490 | -1.75921349 | 0.00000000  |
| C | 0.36368577  | -4.15553687 | -1.25178659 |
| C | 1.76280732  | -3.78064338 | -1.25178659 |
| C | 3.78064338  | -1.76280732 | -1.25178659 |
| C | 4.15553687  | -0.36368577 | -1.25178659 |
| C | 3.41695761  | 2.39272955  | -1.25178659 |

|   |             |             |             |
|---|-------------|-------------|-------------|
| C | 2.39272955  | 3.41695761  | -1.25178659 |
| C | -0.36368577 | 4.15553687  | -1.25178659 |
| C | -1.76280732 | 3.78064338  | -1.25178659 |
| C | -3.78064338 | 1.76280732  | -1.25178659 |
| C | -4.15553687 | 0.36368577  | -1.25178659 |
| C | -3.41695761 | -2.39272955 | -1.25178659 |
| C | -2.39272955 | -3.41695761 | -1.25178659 |
| C | 2.39278097  | -3.41714280 | -2.49862406 |
| C | 3.41714280  | -2.39278097 | -2.49862406 |
| C | 4.15572296  | 0.36363770  | -2.49862406 |
| C | 3.78078050  | 1.76294199  | -2.49862406 |
| C | 1.76294199  | 3.78078050  | -2.49862406 |
| C | 0.36363770  | 4.15572296  | -2.49862406 |
| C | -2.39278097 | 3.41714280  | -2.49862406 |
| C | -3.41714280 | 2.39278097  | -2.49862406 |
| C | -4.15572296 | -0.36363770 | -2.49862406 |
| C | -3.78078050 | -1.76294199 | -2.49862406 |
| C | -1.76294199 | -3.78078050 | -2.49862406 |
| C | -0.36363770 | -4.15572296 | -2.49862406 |
| C | 3.77837907  | -1.75934715 | -3.75034809 |
| C | 4.15184583  | -0.36555021 | -3.75034809 |
| C | 3.41282886  | 2.39249869  | -3.75034809 |
| C | 2.39249869  | 3.41282886  | -3.75034809 |
| C | -0.36555021 | 4.15184583  | -3.75034809 |
| C | -1.75934715 | 3.77837907  | -3.75034809 |
| C | -3.77837907 | 1.75934715  | -3.75034809 |
| C | -4.15184583 | 0.36555021  | -3.75034809 |
| C | -3.41282886 | -2.39249869 | -3.75034809 |
| C | -2.39249869 | -3.41282886 | -3.75034809 |
| C | 0.36555021  | -4.15184583 | -3.75034809 |
| C | 1.75934715  | -3.77837907 | -3.75034809 |
| C | 4.15601105  | 0.36381753  | -5.00234827 |
| C | 3.78111991  | 1.76293030  | -5.00234827 |
| C | 1.76293030  | 3.78111991  | -5.00234827 |
| C | 0.36381753  | 4.15601105  | -5.00234827 |
| C | -2.39308075 | 3.41730238  | -5.00234827 |
| C | -3.41730238 | 2.39308075  | -5.00234827 |
| C | -4.15601105 | -0.36381753 | -5.00234827 |
| C | -3.78111991 | -1.76293030 | -5.00234827 |
| C | -1.76293030 | -3.78111991 | -5.00234827 |
| C | -0.36381753 | -4.15601105 | -5.00234827 |
| C | 2.39308075  | -3.41730238 | -5.00234827 |
| C | 3.41730238  | -2.39308075 | -5.00234827 |
| C | 3.41774717  | 2.39319018  | -6.24914337 |
| C | 2.39319018  | 3.41774717  | -6.24914337 |
| C | -0.36368991 | 4.15645097  | -6.24914337 |
| C | -1.76326079 | 3.78143708  | -6.24914337 |
| C | -3.78143708 | 1.76326079  | -6.24914337 |
| C | -4.15645097 | 0.36368991  | -6.24914337 |
| C | -3.41774717 | -2.39319018 | -6.24914337 |
| C | -2.39319018 | -3.41774717 | -6.24914337 |
| C | 0.36368991  | -4.15645097 | -6.24914337 |
| C | 1.76326079  | -3.78143708 | -6.24914337 |
| C | 3.78143708  | -1.76326079 | -6.24914337 |
| C | 4.15645097  | -0.36368991 | -6.24914337 |
| C | 1.75953727  | 3.77904929  | -7.50066828 |
| C | 0.36572067  | 4.15252133  | -7.50066828 |
| C | -2.39298405 | 3.41332863  | -7.50066828 |
| C | -3.41332863 | 2.39298405  | -7.50066828 |
| C | -4.15252133 | -0.36572067 | -7.50066828 |
| C | -3.77904929 | -1.75953727 | -7.50066828 |
| C | -1.75953727 | -3.77904929 | -7.50066828 |
| C | -0.36572067 | -4.15252133 | -7.50066828 |
| C | 2.39298405  | -3.41332863 | -7.50066828 |
| C | 3.41332863  | -2.39298405 | -7.50066828 |
| C | 4.15252133  | 0.36572067  | -7.50066828 |
| C | 3.77904929  | 1.75953727  | -7.50066828 |
| C | -0.36399934 | 4.15669205  | -8.75256608 |
| C | -1.76311335 | 3.78180058  | -8.75256608 |
| C | -3.78180058 | 1.76311335  | -8.75256608 |

|   |             |             |              |
|---|-------------|-------------|--------------|
| C | -4.15669205 | 0.36399934  | -8.75256608  |
| C | -3.41780124 | -2.39357870 | -8.75256608  |
| C | -2.39357870 | -3.41780124 | -8.75256608  |
| C | 0.36399934  | -4.15669205 | -8.75256608  |
| C | 1.76311335  | -3.78180058 | -8.75256608  |
| C | 3.78180058  | -1.76311335 | -8.75256608  |
| C | 4.15669205  | -0.36399934 | -8.75256608  |
| C | 3.41780124  | 2.39357870  | -8.75256608  |
| C | 2.39357870  | 3.41780124  | -8.75256608  |
| C | -2.39357997 | 3.41834845  | -9.99886964  |
| C | -3.41834845 | 2.39357997  | -9.99886964  |
| C | -4.15716658 | -0.36372683 | -9.99886964  |
| C | -3.78207529 | -1.76358662 | -9.99886964  |
| C | -1.76358662 | -3.78207529 | -9.99886964  |
| C | -0.36372683 | -4.15716658 | -9.99886964  |
| C | 2.39357997  | -3.41834845 | -9.99886964  |
| C | 3.41834845  | -2.39357997 | -9.99886964  |
| C | 4.15716658  | 0.36372683  | -9.99886964  |
| C | 3.78207529  | 1.76358662  | -9.99886964  |
| C | 1.76358662  | 3.78207529  | -9.99886964  |
| C | 0.36372683  | 4.15716658  | -9.99886964  |
| C | -3.77948991 | 1.75965536  | -11.24987485 |
| C | -4.15296196 | 0.36583871  | -11.24987485 |
| C | -3.41365120 | -2.39330660 | -11.24987485 |
| C | -2.39330660 | -3.41365120 | -11.24987485 |
| C | 0.36583871  | -4.15296196 | -11.24987485 |
| C | 1.75965536  | -3.77948991 | -11.24987485 |
| C | 3.77948991  | -1.75965536 | -11.24987485 |
| C | 4.15296196  | -0.36583871 | -11.24987485 |
| C | 3.41365120  | 2.39330660  | -11.24987485 |
| C | 2.39330660  | 3.41365120  | -11.24987485 |
| C | -0.36583871 | 4.15296196  | -11.24987485 |
| C | -1.75965536 | 3.77948991  | -11.24987485 |
| C | -4.15720283 | -0.36410951 | -12.50148852 |
| C | -3.78229802 | -1.76327333 | -12.50148852 |
| C | -1.76327333 | -3.78229802 | -12.50148852 |
| C | -0.36410951 | -4.15720283 | -12.50148852 |
| C | 2.39392950  | -3.41818851 | -12.50148852 |
| C | 3.41818851  | -2.39392950 | -12.50148852 |
| C | 4.15720283  | 0.36410951  | -12.50148852 |
| C | 3.78229802  | 1.76327333  | -12.50148852 |
| C | 1.76327333  | 3.78229802  | -12.50148852 |
| C | 0.36410951  | 4.15720283  | -12.50148852 |
| C | -2.39392950 | 3.41818851  | -12.50148852 |
| C | -3.41818851 | 2.39392950  | -12.50148852 |
| C | -3.41878724 | -2.39384575 | -13.74724234 |
| C | -2.39384575 | -3.41878724 | -13.74724234 |
| C | 0.36373762  | -4.15767948 | -13.74724234 |
| C | 1.76383372  | -3.78252486 | -13.74724234 |
| C | 3.78252486  | -1.76383372 | -13.74724234 |
| C | 4.15767948  | -0.36373762 | -13.74724234 |
| C | 3.41878724  | 2.39384575  | -13.74724234 |
| C | 2.39384575  | 3.41878724  | -13.74724234 |
| C | -0.36373762 | 4.15767948  | -13.74724234 |
| C | -1.76383372 | 3.78252486  | -13.74724234 |
| C | -3.78252486 | 1.76383372  | -13.74724234 |
| C | -4.15767948 | 0.36373762  | -13.74724234 |
| C | -1.75948186 | -3.77950327 | -14.99794591 |
| C | -0.36599565 | -4.15288678 | -14.99794591 |
| C | 2.39340492  | -3.41350762 | -14.99794591 |
| C | 3.41350762  | -2.39340492 | -14.99794591 |
| C | 4.15288678  | 0.36599565  | -14.99794591 |
| C | 3.77950327  | 1.75948186  | -14.99794591 |
| C | 1.75948186  | 3.77950327  | -14.99794591 |
| C | 0.36599565  | 4.15288678  | -14.99794591 |
| C | -2.39340492 | 3.41350762  | -14.99794591 |
| C | -3.41350762 | 2.39340492  | -14.99794591 |
| C | -4.15288678 | -0.36599565 | -14.99794591 |
| C | -3.77950327 | -1.75948186 | -14.99794591 |
| C | 0.36415496  | -4.15706625 | -16.24975013 |

|   |             |             |              |
|---|-------------|-------------|--------------|
| C | 1.76316568  | -3.78220246 | -16.24975013 |
| C | 3.78220246  | -1.76316568 | -16.24975013 |
| C | 4.15706625  | -0.36415496 | -16.24975013 |
| C | 3.41804750  | 2.39390057  | -16.24975013 |
| C | 2.39390057  | 3.41804750  | -16.24975013 |
| C | -0.36415496 | 4.15706625  | -16.24975013 |
| C | -1.76316568 | 3.78220246  | -16.24975013 |
| C | -3.78220246 | 1.76316568  | -16.24975013 |
| C | -4.15706625 | 0.36415496  | -16.24975013 |
| C | -3.41804750 | -2.39390057 | -16.24975013 |
| C | -2.39390057 | -3.41804750 | -16.24975013 |
| C | 2.39385822  | -3.41893849 | -17.49533068 |
| C | 3.41893849  | -2.39385822 | -17.49533068 |
| C | 4.15781670  | 0.36367278  | -17.49533068 |
| C | 3.78261127  | 1.76395848  | -17.49533068 |
| C | 1.76395848  | 3.78261127  | -17.49533068 |
| C | 0.36367278  | 4.15781670  | -17.49533068 |
| C | -2.39385822 | 3.41893849  | -17.49533068 |
| C | -3.41893849 | 2.39385822  | -17.49533068 |
| C | -4.15781670 | -0.36367278 | -17.49533068 |
| C | -3.78261127 | -1.76395848 | -17.49533068 |
| C | -1.76395848 | -3.78261127 | -17.49533068 |
| C | -0.36367278 | -4.15781670 | -17.49533068 |
| C | 3.77941781  | -1.75930712 | -18.74618187 |
| C | 4.15272539  | -0.36610424 | -18.74618187 |
| C | 3.41331357  | 2.39341827  | -18.74618187 |
| C | 2.39341827  | 3.41331357  | -18.74618187 |
| C | -0.36610424 | 4.15272539  | -18.74618187 |
| C | -1.75930712 | 3.77941781  | -18.74618187 |
| C | -3.77941781 | 1.75930712  | -18.74618187 |
| C | -4.15272539 | 0.36610424  | -18.74618187 |
| C | -3.41331357 | -2.39341827 | -18.74618187 |
| C | -2.39341827 | -3.41331357 | -18.74618187 |
| C | 0.36610424  | -4.15272539 | -18.74618187 |
| C | 1.75930712  | -3.77941781 | -18.74618187 |
| C | 4.15678200  | 0.36402393  | -19.99861465 |
| C | 3.78189077  | 1.76313703  | -19.99861465 |
| C | 1.76313703  | 3.78189077  | -19.99861465 |
| C | 0.36402393  | 4.15678200  | -19.99861465 |
| C | -2.39364497 | 3.41786684  | -19.99861465 |
| C | -3.41786684 | 2.39364497  | -19.99861465 |
| C | -4.15678200 | -0.36402393 | -19.99861465 |
| C | -3.78189077 | -1.76313703 | -19.99861465 |
| C | -1.76313703 | -3.78189077 | -19.99861465 |
| C | -0.36402393 | -4.15678200 | -19.99861465 |
| C | 2.39364497  | -3.41786684 | -19.99861465 |
| C | 3.41786684  | -2.39364497 | -19.99861465 |
| C | 3.41880365  | 2.39331486  | -21.24411807 |
| C | 2.39331486  | 3.41880365  | -21.24411807 |
| C | -0.36326965 | 4.15742824  | -21.24411807 |
| C | -1.76411338 | 3.78207330  | -21.24411807 |
| C | -3.78207330 | 1.76411338  | -21.24411807 |
| C | -4.15742824 | 0.36326965  | -21.24411807 |
| C | -3.41880365 | -2.39331486 | -21.24411807 |
| C | -2.39331486 | -3.41880365 | -21.24411807 |
| C | 0.36326965  | -4.15742824 | -21.24411807 |
| C | 1.76411338  | -3.78207330 | -21.24411807 |
| C | 3.78207330  | -1.76411338 | -21.24411807 |
| C | 4.15742824  | -0.36326965 | -21.24411807 |
| C | 1.75866799  | 3.77846300  | -22.49529200 |
| C | 0.36618034  | 4.15157894  | -22.49529200 |
| C | -2.39291095 | 3.41228266  | -22.49529200 |
| C | -3.41228266 | 2.39291095  | -22.49529200 |
| C | -4.15157894 | -0.36618034 | -22.49529200 |
| C | -3.77846300 | -1.75866799 | -22.49529200 |
| C | -1.75866799 | -3.77846300 | -22.49529200 |
| C | -0.36618034 | -4.15157894 | -22.49529200 |
| C | 2.39291095  | -3.41228266 | -22.49529200 |
| C | 3.41228266  | -2.39291095 | -22.49529200 |
| C | 4.15157894  | 0.36618034  | -22.49529200 |

|   |             |             |              |
|---|-------------|-------------|--------------|
| C | 3.77846300  | 1.75866799  | -22.49529200 |
| C | -0.36392698 | 4.15654481  | -23.74872700 |
| C | -1.76310239 | 3.78163689  | -23.74872700 |
| C | -3.78163689 | 1.76310239  | -23.74872700 |
| C | -4.15654481 | 0.36392698  | -23.74872700 |
| C | -3.41770991 | -2.39344242 | -23.74872700 |
| C | -2.39344242 | -3.41770991 | -23.74872700 |
| C | 0.36392698  | -4.15654481 | -23.74872700 |
| C | 1.76310239  | -3.78163689 | -23.74872700 |
| C | 3.78163689  | -1.76310239 | -23.74872700 |
| C | 4.15654481  | -0.36392698 | -23.74872700 |
| C | 3.41770991  | 2.39344242  | -23.74872700 |
| C | 2.39344242  | 3.41770991  | -23.74872700 |
| C | -2.39359050 | 3.41999197  | -24.99370087 |
| C | -3.41999197 | 2.39359050  | -24.99370087 |
| C | -4.15859517 | -0.36291419 | -24.99370087 |
| C | -3.78290616 | -1.76500468 | -24.99370087 |
| C | -1.76500468 | -3.78290616 | -24.99370087 |
| C | -0.36291419 | -4.15859517 | -24.99370087 |
| C | 2.39359050  | -3.41999197 | -24.99370087 |
| C | 3.41999197  | -2.39359050 | -24.99370087 |
| C | 4.15859517  | 0.36291419  | -24.99370087 |
| C | 3.78290616  | 1.76500468  | -24.99370087 |
| C | 1.76500468  | 3.78290616  | -24.99370087 |
| C | 0.36291419  | 4.15859517  | -24.99370087 |
| C | -3.77847416 | 1.75782710  | -26.24468600 |
| C | -4.15116816 | 0.36691416  | -26.24468600 |
| C | -3.41156000 | -2.39334107 | -26.24468600 |
| C | -2.39334107 | -3.41156000 | -26.24468600 |
| C | 0.36691416  | -4.15116816 | -26.24468600 |
| C | 1.75782710  | -3.77847416 | -26.24468600 |
| C | 3.77847416  | -1.75782710 | -26.24468600 |
| C | 4.15116816  | -0.36691416 | -26.24468600 |
| C | 3.41156000  | 2.39334107  | -26.24468600 |
| C | 2.39334107  | 3.41156000  | -26.24468600 |
| C | -0.36691416 | 4.15116816  | -26.24468600 |
| C | -1.75782710 | 3.77847416  | -26.24468600 |
| C | -4.15504352 | -0.36371547 | -27.49975172 |
| C | -3.78023097 | -1.76253492 | -27.49975172 |
| C | -1.76253492 | -3.78023097 | -27.49975172 |
| C | -0.36371547 | -4.15504352 | -27.49975172 |
| C | 2.39250859  | -3.41651551 | -27.49975172 |
| C | 3.41651551  | -2.39250859 | -27.49975172 |
| C | 4.15504352  | 0.36371547  | -27.49975172 |
| C | 3.78023097  | 1.76253492  | -27.49975172 |
| C | 1.76253492  | 3.78023097  | -27.49975172 |
| C | 0.36371547  | 4.15504352  | -27.49975172 |
| C | -2.39250859 | 3.41651551  | -27.49975172 |
| C | -3.41651551 | 2.39250859  | -27.49975172 |
| C | -3.41712825 | -2.39031729 | -28.74308610 |
| C | -2.39031729 | -3.41712825 | -28.74308610 |
| C | 0.36151137  | -4.15447852 | -28.74308610 |
| C | 1.76416123  | -3.77863962 | -28.74308610 |
| C | 3.77863962  | -1.76416123 | -28.74308610 |
| C | 4.15447852  | -0.36151137 | -28.74308610 |
| C | 3.41712825  | 2.39031729  | -28.74308610 |
| C | 2.39031729  | 3.41712825  | -28.74308610 |
| C | -0.36151137 | 4.15447852  | -28.74308610 |
| C | -1.76416123 | 3.77863962  | -28.74308610 |
| C | -3.77863962 | 1.76416123  | -28.74308610 |
| C | -4.15447852 | 0.36151137  | -28.74308610 |
| C | -1.74995429 | -3.76376792 | -29.99364859 |
| C | -0.36637909 | -4.13449578 | -29.99364859 |
| C | 2.38454149  | -3.39738883 | -29.99364859 |
| C | 3.39738883  | -2.38454149 | -29.99364859 |
| C | 4.13449578  | 0.36637909  | -29.99364859 |
| C | 3.76376792  | 1.74995429  | -29.99364859 |
| C | 1.74995429  | 3.76376792  | -29.99364859 |
| C | 0.36637909  | 4.13449578  | -29.99364859 |
| C | -2.38454149 | 3.39738883  | -29.99364859 |



|   |             |             |              |
|---|-------------|-------------|--------------|
| C | -3.39738883 | 2.38454149  | -29.99364859 |
| C | -4.13449578 | -0.36637909 | -29.99364859 |
| C | -3.76376792 | -1.74995429 | -29.99364859 |
| C | 0.35958296  | -4.14484495 | -31.25689823 |
| C | 1.76101450  | -3.76933250 | -31.25689823 |
| C | 3.76933250  | -1.76101450 | -31.25689823 |
| C | 4.14484495  | -0.35958296 | -31.25689823 |
| C | 3.40974955  | 2.38383045  | -31.25689823 |
| C | 2.38383045  | 3.40974955  | -31.25689823 |
| C | -0.35958296 | 4.14484495  | -31.25689823 |
| C | -1.76101450 | 3.76933250  | -31.25689823 |
| C | -3.76933250 | 1.76101450  | -31.25689823 |
| C | -4.14484495 | 0.35958296  | -31.25689823 |
| C | -3.40974955 | -2.38383045 | -31.25689823 |
| C | -2.38383045 | -3.40974955 | -31.25689823 |
| C | 2.41527954  | -3.45796605 | -32.49716589 |
| C | 3.45796605  | -2.41527954 | -32.49716589 |
| C | 4.20232621  | 0.36271041  | -32.49716589 |
| C | 3.82067646  | 1.78704668  | -32.49716589 |
| C | 1.78704668  | 3.82067646  | -32.49716589 |
| C | 0.36271041  | 4.20232621  | -32.49716589 |
| C | -2.41527954 | 3.45796605  | -32.49716589 |
| C | -3.45796605 | 2.41527954  | -32.49716589 |
| C | -4.20232621 | -0.36271041 | -32.49716589 |
| C | -3.82067646 | -1.78704668 | -32.49716589 |
| C | -1.78704668 | -3.82067646 | -32.49716589 |
| C | -0.36271041 | -4.20232621 | -32.49716589 |
| C | 3.89518327  | -1.76174298 | -33.70938320 |
| C | 4.25419916  | -0.42187746 | -33.70938320 |
| C | 3.47330581  | 2.49245618  | -33.70938320 |
| C | 2.49245618  | 3.47330581  | -33.70938320 |
| C | -0.42187746 | 4.25419916  | -33.70938320 |
| C | -1.76174298 | 3.89518327  | -33.70938320 |
| C | -3.89518327 | 1.76174298  | -33.70938320 |
| C | -4.25419916 | 0.42187746  | -33.70938320 |
| C | -3.47330581 | -2.49245618 | -33.70938320 |
| C | -2.49245618 | -3.47330581 | -33.70938320 |
| C | 0.42187746  | -4.25419916 | -33.70938320 |
| C | 1.76174298  | -3.89518327 | -33.70938320 |
| H | -3.81751151 | 2.29278573  | 34.66708868  |
| H | -4.45245481 | -0.07685494 | 34.66708868  |
| H | -3.89436645 | -2.15966908 | 34.66708868  |
| H | -2.15966908 | -3.89436645 | 34.66708868  |
| H | -0.07685494 | -4.45245481 | 34.66708868  |
| H | 2.29278573  | -3.81751151 | 34.66708868  |
| H | 3.81751151  | -2.29278573 | 34.66708868  |
| H | 4.45245481  | 0.07685494  | 34.66708868  |
| H | 3.89436645  | 2.15966908  | 34.66708868  |
| H | 2.15966908  | 3.89436645  | 34.66708868  |
| H | 0.07685494  | 4.45245481  | 34.66708868  |
| H | -2.29278573 | 3.81751151  | 34.66708868  |
| H | 3.81751151  | -2.29278573 | -34.66708868 |
| H | 4.45245481  | 0.07685494  | -34.66708868 |
| H | 3.89436645  | 2.15966908  | -34.66708868 |
| H | 2.15966908  | 3.89436645  | -34.66708868 |
| H | 0.07685494  | 4.45245481  | -34.66708868 |
| H | -2.29278573 | 3.81751151  | -34.66708868 |
| H | -3.81751151 | 2.29278573  | -34.66708868 |
| H | -4.45245481 | -0.07685494 | -34.66708868 |
| H | -3.89436645 | -2.15966908 | -34.66708868 |
| H | -2.15966908 | -3.89436645 | -34.66708868 |
| H | -0.07685494 | -4.45245481 | -34.66708868 |
| H | 2.29278573  | -3.81751151 | -34.66708868 |

Nanotube (6,6) u28v0s  
B3LYP/STO-3G Energy: -25313.417910

|   |           |           |            |
|---|-----------|-----------|------------|
| C | -3.302757 | -2.706693 | -34.340142 |
|---|-----------|-----------|------------|

|   |           |           |            |
|---|-----------|-----------|------------|
| C | -3.995443 | -1.506925 | -34.340142 |
| C | -3.995443 | 1.506925  | -34.340142 |
| C | -3.302757 | 2.706693  | -34.340142 |
| C | -0.692686 | 4.213618  | -34.340142 |
| C | 0.692686  | 4.213618  | -34.340142 |
| C | 3.302757  | 2.706693  | -34.340142 |
| C | 3.995443  | 1.506925  | -34.340142 |
| C | 3.995443  | -1.506925 | -34.340142 |
| C | 3.302757  | -2.706693 | -34.340142 |
| C | 0.692686  | -4.213618 | -34.340142 |
| C | -0.692686 | -4.213618 | -34.340142 |
| C | -4.149430 | -0.736061 | -33.126132 |
| C | -4.149430 | 0.736061  | -33.126132 |
| C | -2.712162 | 3.225481  | -33.126132 |
| C | -1.437267 | 3.961542  | -33.126132 |
| C | 1.437267  | 3.961542  | -33.126132 |
| C | 2.712162  | 3.225481  | -33.126132 |
| C | 4.149430  | 0.736061  | -33.126132 |
| C | 4.149430  | -0.736061 | -33.126132 |
| C | 2.712162  | -3.225481 | -33.126132 |
| C | 1.437267  | -3.961542 | -33.126132 |
| C | -1.437267 | -3.961542 | -33.126132 |
| C | -2.712162 | -3.225481 | -33.126132 |
| C | -3.911805 | 1.420510  | -31.886070 |
| C | -3.186100 | 2.677467  | -31.886070 |
| C | -0.725705 | 4.097977  | -31.886070 |
| C | 0.725705  | 4.097977  | -31.886070 |
| C | 3.186100  | 2.677467  | -31.886070 |
| C | 3.911805  | 1.420510  | -31.886070 |
| C | 3.911805  | -1.420510 | -31.886070 |
| C | 3.186100  | -2.677467 | -31.886070 |
| C | 0.725705  | -4.097977 | -31.886070 |
| C | -0.725705 | -4.097977 | -31.886070 |
| C | -3.186100 | -2.677467 | -31.886070 |
| C | -3.911805 | -1.420510 | -31.886070 |
| C | -2.663927 | 3.182578  | -30.623937 |
| C | -1.424230 | 3.898318  | -30.623937 |
| C | 1.424230  | 3.898318  | -30.623937 |
| C | 2.663927  | 3.182578  | -30.623937 |
| C | 4.088157  | 0.715739  | -30.623937 |
| C | 4.088157  | -0.715739 | -30.623937 |
| C | 2.663927  | -3.182578 | -30.623937 |
| C | 1.424230  | -3.898318 | -30.623937 |
| C | -1.424230 | -3.898318 | -30.623937 |
| C | -2.663927 | -3.182578 | -30.623937 |
| C | -4.088157 | -0.715739 | -30.623937 |
| C | -4.088157 | 0.715739  | -30.623937 |
| C | -0.725100 | 4.105070  | -29.371911 |
| C | 0.725100  | 4.105070  | -29.371911 |
| C | 3.192545  | 2.680490  | -29.371911 |
| C | 3.917645  | 1.424580  | -29.371911 |
| C | 3.917645  | -1.424580 | -29.371911 |
| C | 3.192545  | -2.680490 | -29.371911 |
| C | 0.725100  | -4.105070 | -29.371911 |
| C | -0.725100 | -4.105070 | -29.371911 |
| C | -3.192545 | -2.680490 | -29.371911 |
| C | -3.917645 | -1.424580 | -29.371911 |
| C | -3.917645 | 1.424580  | -29.371911 |
| C | -3.192545 | 2.680490  | -29.371911 |
| C | 1.426732  | 3.920265  | -28.128831 |
| C | 2.681683  | 3.195719  | -28.128831 |
| C | 4.108416  | 0.724546  | -28.128831 |
| C | 4.108416  | -0.724546 | -28.128831 |
| C | 2.681683  | -3.195719 | -28.128831 |
| C | 1.426732  | -3.920265 | -28.128831 |
| C | -1.426732 | -3.920265 | -28.128831 |
| C | -2.681683 | -3.195719 | -28.128831 |
| C | -4.108416 | -0.724546 | -28.128831 |
| C | -4.108416 | 0.724546  | -28.128831 |
| C | -2.681683 | 3.195719  | -28.128831 |

|   |           |           |            |
|---|-----------|-----------|------------|
| C | -1.426732 | 3.920265  | -28.128831 |
| C | 3.194254  | 2.675061  | -26.874917 |
| C | 3.913798  | 1.428775  | -26.874917 |
| C | 3.913798  | -1.428775 | -26.874917 |
| C | 3.194254  | -2.675061 | -26.874917 |
| C | 0.719544  | -4.103836 | -26.874917 |
| C | -0.719544 | -4.103836 | -26.874917 |
| C | -3.194254 | -2.675061 | -26.874917 |
| C | -3.913798 | -1.428775 | -26.874917 |
| C | -3.913798 | 1.428775  | -26.874917 |
| C | -3.194254 | 2.675061  | -26.874917 |
| C | -0.719544 | 4.103836  | -26.874917 |
| C | 0.719544  | 4.103836  | -26.874917 |
| C | 4.109473  | 0.724618  | -25.622458 |
| C | 4.109473  | -0.724618 | -25.622458 |
| C | 2.682274  | -3.196599 | -25.622458 |
| C | 1.427199  | -3.921217 | -25.622458 |
| C | -1.427199 | -3.921217 | -25.622458 |
| C | -2.682274 | -3.196599 | -25.622458 |
| C | -4.109473 | -0.724618 | -25.622458 |
| C | -4.109473 | 0.724618  | -25.622458 |
| C | -2.682274 | 3.196599  | -25.622458 |
| C | -1.427199 | 3.921217  | -25.622458 |
| C | 1.427199  | 3.921217  | -25.622458 |
| C | 2.682274  | 3.196599  | -25.622458 |
| C | 3.921283  | -1.427095 | -24.377613 |
| C | 3.196542  | -2.682383 | -24.377613 |
| C | 0.724741  | -4.109478 | -24.377613 |
| C | -0.724741 | -4.109478 | -24.377613 |
| C | -3.196542 | -2.682383 | -24.377613 |
| C | -3.921283 | -1.427095 | -24.377613 |
| C | -3.921283 | 1.427095  | -24.377613 |
| C | -3.196542 | 2.682383  | -24.377613 |
| C | -0.724741 | 4.109478  | -24.377613 |
| C | 0.724741  | 4.109478  | -24.377613 |
| C | 3.196542  | 2.682383  | -24.377613 |
| C | 3.921283  | 1.427095  | -24.377613 |
| C | 2.675828  | -3.194055 | -23.125461 |
| C | 1.428219  | -3.914363 | -23.125461 |
| C | -1.428219 | -3.914363 | -23.125461 |
| C | -2.675828 | -3.194055 | -23.125461 |
| C | -4.104047 | -0.720308 | -23.125461 |
| C | -4.104047 | 0.720308  | -23.125461 |
| C | -2.675828 | 3.194055  | -23.125461 |
| C | -1.428219 | 3.914363  | -23.125461 |
| C | 1.428219  | 3.914363  | -23.125461 |
| C | 2.675828  | 3.194055  | -23.125461 |
| C | 4.104047  | 0.720308  | -23.125461 |
| C | 4.104047  | -0.720308 | -23.125461 |
| C | 0.723873  | -4.108132 | -21.872623 |
| C | -0.723873 | -4.108132 | -21.872623 |
| C | -3.195810 | -2.680959 | -21.872623 |
| C | -3.919684 | -1.427174 | -21.872623 |
| C | -3.919684 | 1.427174  | -21.872623 |
| C | -3.195810 | 2.680959  | -21.872623 |
| C | -0.723873 | 4.108132  | -21.872623 |
| C | 0.723873  | 4.108132  | -21.872623 |
| C | 3.195810  | 2.680959  | -21.872623 |
| C | 3.919684  | 1.427174  | -21.872623 |
| C | 3.919684  | -1.427174 | -21.872623 |
| C | 3.195810  | -2.680959 | -21.872623 |
| C | -1.427021 | -3.921155 | -20.626876 |
| C | -2.682309 | -3.196414 | -20.626876 |
| C | -4.109330 | -0.724741 | -20.626876 |
| C | -4.109330 | 0.724741  | -20.626876 |
| C | -2.682309 | 3.196414  | -20.626876 |
| C | -1.427021 | 3.921155  | -20.626876 |
| C | 1.427021  | 3.921155  | -20.626876 |
| C | 2.682309  | 3.196414  | -20.626876 |
| C | 4.109330  | 0.724741  | -20.626876 |

|   |           |           |            |
|---|-----------|-----------|------------|
| C | 4.109330  | -0.724741 | -20.626876 |
| C | 2.682309  | -3.196414 | -20.626876 |
| C | 1.427021  | -3.921155 | -20.626876 |
| C | -3.194285 | -2.676461 | -19.375715 |
| C | -3.915026 | -1.428101 | -19.375715 |
| C | -3.915026 | 1.428101  | -19.375715 |
| C | -3.194285 | 2.676461  | -19.375715 |
| C | -0.720741 | 4.104562  | -19.375715 |
| C | 0.720741  | 4.104562  | -19.375715 |
| C | 3.194285  | 2.676461  | -19.375715 |
| C | 3.915026  | 1.428101  | -19.375715 |
| C | 3.915026  | -1.428101 | -19.375715 |
| C | 3.194285  | -2.676461 | -19.375715 |
| C | 0.720741  | -4.104562 | -19.375715 |
| C | -0.720741 | -4.104562 | -19.375715 |
| C | -4.107697 | -0.723446 | -18.122723 |
| C | -4.107697 | 0.723446  | -18.122723 |
| C | -2.680371 | 3.195647  | -18.122723 |
| C | -1.427326 | 3.919093  | -18.122723 |
| C | 1.427326  | 3.919093  | -18.122723 |
| C | 2.680371  | 3.195647  | -18.122723 |
| C | 4.107697  | 0.723446  | -18.122723 |
| C | 4.107697  | -0.723446 | -18.122723 |
| C | 2.680371  | -3.195647 | -18.122723 |
| C | 1.427326  | -3.919093 | -18.122723 |
| C | -1.427326 | -3.919093 | -18.122723 |
| C | -2.680371 | -3.195647 | -18.122723 |
| C | -3.921272 | 1.427020  | -16.876388 |
| C | -3.196471 | 2.682411  | -16.876388 |
| C | -0.724801 | 4.109431  | -16.876388 |
| C | 0.724801  | 4.109431  | -16.876388 |
| C | 3.196471  | 2.682411  | -16.876388 |
| C | 3.921272  | 1.427020  | -16.876388 |
| C | 3.921272  | -1.427020 | -16.876388 |
| C | 3.196471  | -2.682411 | -16.876388 |
| C | 0.724801  | -4.109431 | -16.876388 |
| C | -0.724801 | -4.109431 | -16.876388 |
| C | -3.196471 | -2.682411 | -16.876388 |
| C | -3.921272 | -1.427020 | -16.876388 |
| C | -2.676919 | 3.194457  | -15.625922 |
| C | -1.428021 | 3.915508  | -15.625922 |
| C | 1.428021  | 3.915508  | -15.625922 |
| C | 2.676919  | 3.194457  | -15.625922 |
| C | 4.104940  | 0.721052  | -15.625922 |
| C | 4.104940  | -0.721052 | -15.625922 |
| C | 2.676919  | -3.194457 | -15.625922 |
| C | 1.428021  | -3.915508 | -15.625922 |
| C | -1.428021 | -3.915508 | -15.625922 |
| C | -2.676919 | -3.194457 | -15.625922 |
| C | -4.104940 | -0.721052 | -15.625922 |
| C | -4.104940 | 0.721052  | -15.625922 |
| C | -0.723100 | 4.107307  | -14.372817 |
| C | 0.723100  | 4.107307  | -14.372817 |
| C | 3.195482  | 2.679876  | -14.372817 |
| C | 3.918582  | 1.427430  | -14.372817 |
| C | 3.918582  | -1.427430 | -14.372817 |
| C | 3.195482  | -2.679876 | -14.372817 |
| C | 0.723100  | -4.107307 | -14.372817 |
| C | -0.723100 | -4.107307 | -14.372817 |
| C | -3.195482 | -2.679876 | -14.372817 |
| C | -3.918582 | -1.427430 | -14.372817 |
| C | -3.918582 | 1.427430  | -14.372817 |
| C | -3.195482 | 2.679876  | -14.372817 |
| C | 1.427008  | 3.921344  | -13.126008 |
| C | 2.682479  | 3.196497  | -13.126008 |
| C | 4.109488  | 0.724846  | -13.126008 |
| C | 4.109488  | -0.724846 | -13.126008 |
| C | 2.682479  | -3.196497 | -13.126008 |
| C | 1.427008  | -3.921344 | -13.126008 |
| C | -1.427008 | -3.921344 | -13.126008 |

|   |           |           |            |
|---|-----------|-----------|------------|
| C | -2.682479 | -3.196497 | -13.126008 |
| C | -4.109488 | -0.724846 | -13.126008 |
| C | -4.109488 | 0.724846  | -13.126008 |
| C | -2.682479 | 3.196497  | -13.126008 |
| C | -1.427008 | 3.921344  | -13.126008 |
| C | 3.194591  | 2.677292  | -11.876116 |
| C | 3.915899  | 1.427951  | -11.876116 |
| C | 3.915899  | -1.427951 | -11.876116 |
| C | 3.194591  | -2.677292 | -11.876116 |
| C | 0.721308  | -4.105243 | -11.876116 |
| C | -0.721308 | -4.105243 | -11.876116 |
| C | -3.194591 | -2.677292 | -11.876116 |
| C | -3.915899 | -1.427951 | -11.876116 |
| C | -3.915899 | 1.427951  | -11.876116 |
| C | -3.194591 | 2.677292  | -11.876116 |
| C | -0.721308 | 4.105243  | -11.876116 |
| C | 0.721308  | 4.105243  | -11.876116 |
| C | 4.106958  | 0.722798  | -10.622925 |
| C | 4.106958  | -0.722798 | -10.622925 |
| C | 2.679440  | -3.195331 | -10.622925 |
| C | 1.427517  | -3.918129 | -10.622925 |
| C | -1.427517 | -3.918129 | -10.622925 |
| C | -2.679440 | -3.195331 | -10.622925 |
| C | -4.106958 | -0.722798 | -10.622925 |
| C | -4.106958 | 0.722798  | -10.622925 |
| C | -2.679440 | 3.195331  | -10.622925 |
| C | -1.427517 | 3.918129  | -10.622925 |
| C | 1.427517  | 3.918129  | -10.622925 |
| C | 2.679440  | 3.195331  | -10.622925 |
| C | 3.921406  | -1.426993 | -9.375690  |
| C | 3.196515  | -2.682541 | -9.375690  |
| C | 0.724891  | -4.109534 | -9.375690  |
| C | -0.724891 | -4.109534 | -9.375690  |
| C | -3.196515 | -2.682541 | -9.375690  |
| C | -3.921406 | -1.426993 | -9.375690  |
| C | -3.921406 | 1.426993  | -9.375690  |
| C | -3.196515 | 2.682541  | -9.375690  |
| C | -0.724891 | 4.109534  | -9.375690  |
| C | 0.724891  | 4.109534  | -9.375690  |
| C | 3.196515  | 2.682541  | -9.375690  |
| C | 3.921406  | 1.426993  | -9.375690  |
| C | 2.677643  | -3.194712 | -8.126308  |
| C | 1.427880  | -3.916262 | -8.126308  |
| C | -1.427880 | -3.916262 | -8.126308  |
| C | -2.677643 | -3.194712 | -8.126308  |
| C | -4.105523 | -0.721551 | -8.126308  |
| C | -4.105523 | 0.721551  | -8.126308  |
| C | -2.677643 | 3.194712  | -8.126308  |
| C | -1.427880 | 3.916262  | -8.126308  |
| C | 1.427880  | 3.916262  | -8.126308  |
| C | 2.677643  | 3.194712  | -8.126308  |
| C | 4.105523  | 0.721551  | -8.126308  |
| C | 4.105523  | -0.721551 | -8.126308  |
| C | 0.722525  | -4.106633 | -6.873052  |
| C | -0.722525 | -4.106633 | -6.873052  |
| C | -3.195186 | -2.679041 | -6.873052  |
| C | -3.917711 | -1.427592 | -6.873052  |
| C | -3.917711 | 1.427592  | -6.873052  |
| C | -3.195186 | 2.679041  | -6.873052  |
| C | -0.722525 | 4.106633  | -6.873052  |
| C | 0.722525  | 4.106633  | -6.873052  |
| C | 3.195186  | 2.679041  | -6.873052  |
| C | 3.917711  | 1.427592  | -6.873052  |
| C | 3.917711  | -1.427592 | -6.873052  |
| C | 3.195186  | -2.679041 | -6.873052  |
| C | -1.426980 | -3.921443 | -5.625406  |
| C | -2.682579 | -3.196523 | -5.625406  |
| C | -4.109560 | -0.724920 | -5.625406  |
| C | -4.109560 | 0.724920  | -5.625406  |
| C | -2.682579 | 3.196523  | -5.625406  |

|   |           |           |           |
|---|-----------|-----------|-----------|
| C | -1.426980 | 3.921443  | -5.625406 |
| C | 1.426980  | 3.921443  | -5.625406 |
| C | 2.682579  | 3.196523  | -5.625406 |
| C | 4.109560  | 0.724920  | -5.625406 |
| C | 4.109560  | -0.724920 | -5.625406 |
| C | 2.682579  | -3.196523 | -5.625406 |
| C | 1.426980  | -3.921443 | -5.625406 |
| C | -3.194825 | -2.677979 | -4.376489 |
| C | -3.916610 | -1.427810 | -4.376489 |
| C | -3.916610 | 1.427810  | -4.376489 |
| C | -3.194825 | 2.677979  | -4.376489 |
| C | -0.721786 | 4.105789  | -4.376489 |
| C | 0.721786  | 4.105789  | -4.376489 |
| C | 3.194825  | 2.677979  | -4.376489 |
| C | 3.916610  | 1.427810  | -4.376489 |
| C | 3.916610  | -1.427810 | -4.376489 |
| C | 3.194825  | -2.677979 | -4.376489 |
| C | 0.721786  | -4.105789 | -4.376489 |
| C | -0.721786 | -4.105789 | -4.376489 |
| C | -4.106324 | -0.722268 | -3.123192 |
| C | -4.106324 | 0.722268  | -3.123192 |
| C | -2.678664 | 3.195047  | -3.123192 |
| C | -1.427660 | 3.917315  | -3.123192 |
| C | 1.427660  | 3.917315  | -3.123192 |
| C | 2.678664  | 3.195047  | -3.123192 |
| C | 4.106324  | 0.722268  | -3.123192 |
| C | 4.106324  | -0.722268 | -3.123192 |
| C | 2.678664  | -3.195047 | -3.123192 |
| C | 1.427660  | -3.917315 | -3.123192 |
| C | -1.427660 | -3.917315 | -3.123192 |
| C | -2.678664 | -3.195047 | -3.123192 |
| C | -3.921459 | 1.426972  | -1.875133 |
| C | -3.196523 | 2.682597  | -1.875133 |
| C | -0.724936 | 4.109569  | -1.875133 |
| C | 0.724936  | 4.109569  | -1.875133 |
| C | 3.196523  | 2.682597  | -1.875133 |
| C | 3.921459  | 1.426972  | -1.875133 |
| C | 3.921459  | -1.426972 | -1.875133 |
| C | 3.196523  | -2.682597 | -1.875133 |
| C | 0.724936  | -4.109569 | -1.875133 |
| C | -0.724936 | -4.109569 | -1.875133 |
| C | -3.196523 | -2.682597 | -1.875133 |
| C | -3.921459 | -1.426972 | -1.875133 |
| C | -2.678325 | 3.194948  | -0.626654 |
| C | -1.427743 | 3.916972  | -0.626654 |
| C | 1.427743  | 3.916972  | -0.626654 |
| C | 2.678325  | 3.194948  | -0.626654 |
| C | 4.106069  | 0.722024  | -0.626654 |
| C | 4.106069  | -0.722024 | -0.626654 |
| C | 2.678325  | -3.194948 | -0.626654 |
| C | 1.427743  | -3.916972 | -0.626654 |
| C | -1.427743 | -3.916972 | -0.626654 |
| C | -2.678325 | -3.194948 | -0.626654 |
| C | -4.106069 | -0.722024 | -0.626654 |
| C | -4.106069 | 0.722024  | -0.626654 |
| C | -0.722024 | 4.106069  | 0.626654  |
| C | 0.722024  | 4.106069  | 0.626654  |
| C | 3.194948  | 2.678325  | 0.626654  |
| C | 3.916972  | 1.427743  | 0.626654  |
| C | 3.916972  | -1.427743 | 0.626654  |
| C | 3.194948  | -2.678325 | 0.626654  |
| C | 0.722024  | -4.106069 | 0.626654  |
| C | -0.722024 | -4.106069 | 0.626654  |
| C | -3.194948 | -2.678325 | 0.626654  |
| C | -3.916972 | -1.427743 | 0.626654  |
| C | -3.916972 | 1.427743  | 0.626654  |
| C | -3.194948 | 2.678325  | 0.626654  |
| C | 1.426972  | 3.921459  | 1.875133  |
| C | 2.682597  | 3.196523  | 1.875133  |
| C | 4.109569  | 0.724936  | 1.875133  |

|   |           |           |          |
|---|-----------|-----------|----------|
| C | 4.109569  | -0.724936 | 1.875133 |
| C | 2.682597  | -3.196523 | 1.875133 |
| C | 1.426972  | -3.921459 | 1.875133 |
| C | -1.426972 | -3.921459 | 1.875133 |
| C | -2.682597 | -3.196523 | 1.875133 |
| C | -4.109569 | -0.724936 | 1.875133 |
| C | -4.109569 | 0.724936  | 1.875133 |
| C | -2.682597 | 3.196523  | 1.875133 |
| C | -1.426972 | 3.921459  | 1.875133 |
| C | 3.195047  | 2.678664  | 3.123192 |
| C | 3.917315  | 1.427660  | 3.123192 |
| C | 3.917315  | -1.427660 | 3.123192 |
| C | 3.195047  | -2.678664 | 3.123192 |
| C | 0.722268  | -4.106324 | 3.123192 |
| C | -0.722268 | -4.106324 | 3.123192 |
| C | -3.195047 | -2.678664 | 3.123192 |
| C | -3.917315 | -1.427660 | 3.123192 |
| C | -3.917315 | 1.427660  | 3.123192 |
| C | -3.195047 | 2.678664  | 3.123192 |
| C | -0.722268 | 4.106324  | 3.123192 |
| C | 0.722268  | 4.106324  | 3.123192 |
| C | 4.105789  | 0.721786  | 4.376489 |
| C | 4.105789  | -0.721786 | 4.376489 |
| C | 2.677979  | -3.194825 | 4.376489 |
| C | 1.427810  | -3.916610 | 4.376489 |
| C | -1.427810 | -3.916610 | 4.376489 |
| C | -2.677979 | -3.194825 | 4.376489 |
| C | -4.105789 | -0.721786 | 4.376489 |
| C | -4.105789 | 0.721786  | 4.376489 |
| C | -2.677979 | 3.194825  | 4.376489 |
| C | -1.427810 | 3.916610  | 4.376489 |
| C | 1.427810  | 3.916610  | 4.376489 |
| C | 2.677979  | 3.194825  | 4.376489 |
| C | 3.921443  | -1.426980 | 5.625406 |
| C | 3.196523  | -2.682579 | 5.625406 |
| C | 0.724920  | -4.109560 | 5.625406 |
| C | -0.724920 | -4.109560 | 5.625406 |
| C | -3.196523 | -2.682579 | 5.625406 |
| C | -3.921443 | -1.426980 | 5.625406 |
| C | -3.921443 | 1.426980  | 5.625406 |
| C | -3.196523 | 2.682579  | 5.625406 |
| C | -0.724920 | 4.109560  | 5.625406 |
| C | 0.724920  | 4.109560  | 5.625406 |
| C | 3.196523  | 2.682579  | 5.625406 |
| C | 3.921443  | 1.426980  | 5.625406 |
| C | 2.679041  | -3.195186 | 6.873052 |
| C | 1.427592  | -3.917711 | 6.873052 |
| C | -1.427592 | -3.917711 | 6.873052 |
| C | -2.679041 | -3.195186 | 6.873052 |
| C | -4.106633 | -0.722525 | 6.873052 |
| C | -4.106633 | 0.722525  | 6.873052 |
| C | -2.679041 | 3.195186  | 6.873052 |
| C | -1.427592 | 3.917711  | 6.873052 |
| C | 1.427592  | 3.917711  | 6.873052 |
| C | 2.679041  | 3.195186  | 6.873052 |
| C | 4.106633  | 0.722525  | 6.873052 |
| C | 4.106633  | -0.722525 | 6.873052 |
| C | 0.721551  | -4.105523 | 8.126308 |
| C | -0.721551 | -4.105523 | 8.126308 |
| C | -3.194712 | -2.677643 | 8.126308 |
| C | -3.916262 | -1.427880 | 8.126308 |
| C | -3.916262 | 1.427880  | 8.126308 |
| C | -3.194712 | 2.677643  | 8.126308 |
| C | -0.721551 | 4.105523  | 8.126308 |
| C | 0.721551  | 4.105523  | 8.126308 |
| C | 3.194712  | 2.677643  | 8.126308 |
| C | 3.916262  | 1.427880  | 8.126308 |
| C | 3.916262  | -1.427880 | 8.126308 |
| C | 3.194712  | -2.677643 | 8.126308 |
| C | -1.426993 | -3.921406 | 9.375690 |

|   |           |           |           |
|---|-----------|-----------|-----------|
| C | -2.682541 | -3.196515 | 9.375690  |
| C | -4.109534 | -0.724891 | 9.375690  |
| C | -4.109534 | 0.724891  | 9.375690  |
| C | -2.682541 | 3.196515  | 9.375690  |
| C | -1.426993 | 3.921406  | 9.375690  |
| C | 1.426993  | 3.921406  | 9.375690  |
| C | 2.682541  | 3.196515  | 9.375690  |
| C | 4.109534  | 0.724891  | 9.375690  |
| C | 4.109534  | -0.724891 | 9.375690  |
| C | 2.682541  | -3.196515 | 9.375690  |
| C | 1.426993  | -3.921406 | 9.375690  |
| C | -3.195331 | -2.679440 | 10.622925 |
| C | -3.918129 | -1.427517 | 10.622925 |
| C | -3.918129 | 1.427517  | 10.622925 |
| C | -3.195331 | 2.679440  | 10.622925 |
| C | -0.722798 | 4.106958  | 10.622925 |
| C | 0.722798  | 4.106958  | 10.622925 |
| C | 3.195331  | 2.679440  | 10.622925 |
| C | 3.918129  | 1.427517  | 10.622925 |
| C | 3.918129  | -1.427517 | 10.622925 |
| C | 3.195331  | -2.679440 | 10.622925 |
| C | 0.722798  | -4.106958 | 10.622925 |
| C | -0.722798 | -4.106958 | 10.622925 |
| C | -4.105243 | -0.721308 | 11.876116 |
| C | -4.105243 | 0.721308  | 11.876116 |
| C | -2.677292 | 3.194591  | 11.876116 |
| C | -1.427951 | 3.915899  | 11.876116 |
| C | 1.427951  | 3.915899  | 11.876116 |
| C | 2.677292  | 3.194591  | 11.876116 |
| C | 4.105243  | 0.721308  | 11.876116 |
| C | 4.105243  | -0.721308 | 11.876116 |
| C | 2.677292  | -3.194591 | 11.876116 |
| C | 1.427951  | -3.915899 | 11.876116 |
| C | -1.427951 | -3.915899 | 11.876116 |
| C | -2.677292 | -3.194591 | 11.876116 |
| C | -3.921344 | 1.427008  | 13.126008 |
| C | -3.196497 | 2.682479  | 13.126008 |
| C | -0.724846 | 4.109488  | 13.126008 |
| C | 0.724846  | 4.109488  | 13.126008 |
| C | 3.196497  | 2.682479  | 13.126008 |
| C | 3.921344  | 1.427008  | 13.126008 |
| C | 3.921344  | -1.427008 | 13.126008 |
| C | 3.196497  | -2.682479 | 13.126008 |
| C | 0.724846  | -4.109488 | 13.126008 |
| C | -0.724846 | -4.109488 | 13.126008 |
| C | -3.196497 | -2.682479 | 13.126008 |
| C | -3.921344 | -1.427008 | 13.126008 |
| C | -2.679876 | 3.195482  | 14.372817 |
| C | -1.427430 | 3.918582  | 14.372817 |
| C | 1.427430  | 3.918582  | 14.372817 |
| C | 2.679876  | 3.195482  | 14.372817 |
| C | 4.107307  | 0.723100  | 14.372817 |
| C | 4.107307  | -0.723100 | 14.372817 |
| C | 2.679876  | -3.195482 | 14.372817 |
| C | 1.427430  | -3.918582 | 14.372817 |
| C | -1.427430 | -3.918582 | 14.372817 |
| C | -2.679876 | -3.195482 | 14.372817 |
| C | -4.107307 | -0.723100 | 14.372817 |
| C | -4.107307 | 0.723100  | 14.372817 |
| C | -0.721052 | 4.104940  | 15.625922 |
| C | 0.721052  | 4.104940  | 15.625922 |
| C | 3.194457  | 2.676919  | 15.625922 |
| C | 3.915508  | 1.428021  | 15.625922 |
| C | 3.915508  | -1.428021 | 15.625922 |
| C | 3.194457  | -2.676919 | 15.625922 |
| C | 0.721052  | -4.104940 | 15.625922 |
| C | -0.721052 | -4.104940 | 15.625922 |
| C | -3.194457 | -2.676919 | 15.625922 |
| C | -3.915508 | -1.428021 | 15.625922 |
| C | -3.915508 | 1.428021  | 15.625922 |



|   |           |           |           |
|---|-----------|-----------|-----------|
| C | -3.194457 | 2.676919  | 15.625922 |
| C | 1.427020  | 3.921272  | 16.876388 |
| C | 2.682411  | 3.196471  | 16.876388 |
| C | 4.109431  | 0.724801  | 16.876388 |
| C | 4.109431  | -0.724801 | 16.876388 |
| C | 2.682411  | -3.196471 | 16.876388 |
| C | 1.427020  | -3.921272 | 16.876388 |
| C | -1.427020 | -3.921272 | 16.876388 |
| C | -2.682411 | -3.196471 | 16.876388 |
| C | -4.109431 | -0.724801 | 16.876388 |
| C | -4.109431 | 0.724801  | 16.876388 |
| C | -2.682411 | 3.196471  | 16.876388 |
| C | -1.427020 | 3.921272  | 16.876388 |
| C | 3.195647  | 2.680371  | 18.122723 |
| C | 3.919093  | 1.427326  | 18.122723 |
| C | 3.919093  | -1.427326 | 18.122723 |
| C | 3.195647  | -2.680371 | 18.122723 |
| C | 0.723446  | -4.107697 | 18.122723 |
| C | -0.723446 | -4.107697 | 18.122723 |
| C | -3.195647 | -2.680371 | 18.122723 |
| C | -3.919093 | -1.427326 | 18.122723 |
| C | -3.919093 | 1.427326  | 18.122723 |
| C | -3.195647 | 2.680371  | 18.122723 |
| C | -0.723446 | 4.107697  | 18.122723 |
| C | 0.723446  | 4.107697  | 18.122723 |
| C | 4.104562  | 0.720741  | 19.375715 |
| C | 4.104562  | -0.720741 | 19.375715 |
| C | 2.676461  | -3.194285 | 19.375715 |
| C | 1.428101  | -3.915026 | 19.375715 |
| C | -1.428101 | -3.915026 | 19.375715 |
| C | -2.676461 | -3.194285 | 19.375715 |
| C | -4.104562 | -0.720741 | 19.375715 |
| C | -4.104562 | 0.720741  | 19.375715 |
| C | -2.676461 | 3.194285  | 19.375715 |
| C | -1.428101 | 3.915026  | 19.375715 |
| C | 1.428101  | 3.915026  | 19.375715 |
| C | 2.676461  | 3.194285  | 19.375715 |
| C | 3.921155  | -1.427021 | 20.626876 |
| C | 3.196414  | -2.682309 | 20.626876 |
| C | 0.724741  | -4.109330 | 20.626876 |
| C | -0.724741 | -4.109330 | 20.626876 |
| C | -3.196414 | -2.682309 | 20.626876 |
| C | -3.921155 | -1.427021 | 20.626876 |
| C | -3.921155 | 1.427021  | 20.626876 |
| C | -3.196414 | 2.682309  | 20.626876 |
| C | -0.724741 | 4.109330  | 20.626876 |
| C | 0.724741  | 4.109330  | 20.626876 |
| C | 3.196414  | 2.682309  | 20.626876 |
| C | 3.921155  | 1.427021  | 20.626876 |
| C | 2.680959  | -3.195810 | 21.872623 |
| C | 1.427174  | -3.919684 | 21.872623 |
| C | -1.427174 | -3.919684 | 21.872623 |
| C | -2.680959 | -3.195810 | 21.872623 |
| C | -4.108132 | -0.723873 | 21.872623 |
| C | -4.108132 | 0.723873  | 21.872623 |
| C | -2.680959 | 3.195810  | 21.872623 |
| C | -1.427174 | 3.919684  | 21.872623 |
| C | 1.427174  | 3.919684  | 21.872623 |
| C | 2.680959  | 3.195810  | 21.872623 |
| C | 4.108132  | 0.723873  | 21.872623 |
| C | 4.108132  | -0.723873 | 21.872623 |
| C | 0.720308  | -4.104047 | 23.125461 |
| C | -0.720308 | -4.104047 | 23.125461 |
| C | -3.194055 | -2.675828 | 23.125461 |
| C | -3.914363 | -1.428219 | 23.125461 |
| C | -3.914363 | 1.428219  | 23.125461 |
| C | -3.194055 | 2.675828  | 23.125461 |
| C | -0.720308 | 4.104047  | 23.125461 |
| C | 0.720308  | 4.104047  | 23.125461 |
| C | 3.194055  | 2.675828  | 23.125461 |

|   |           |           |           |
|---|-----------|-----------|-----------|
| C | 3.914363  | 1.428219  | 23.125461 |
| C | 3.914363  | -1.428219 | 23.125461 |
| C | 3.194055  | -2.675828 | 23.125461 |
| C | -1.427095 | -3.921283 | 24.377613 |
| C | -2.682383 | -3.196542 | 24.377613 |
| C | -4.109478 | -0.724741 | 24.377613 |
| C | -4.109478 | 0.724741  | 24.377613 |
| C | -2.682383 | 3.196542  | 24.377613 |
| C | -1.427095 | 3.921283  | 24.377613 |
| C | 1.427095  | 3.921283  | 24.377613 |
| C | 2.682383  | 3.196542  | 24.377613 |
| C | 4.109478  | 0.724741  | 24.377613 |
| C | 4.109478  | -0.724741 | 24.377613 |
| C | 2.682383  | -3.196542 | 24.377613 |
| C | 1.427095  | -3.921283 | 24.377613 |
| C | -3.196599 | -2.682274 | 25.622458 |
| C | -3.921217 | -1.427199 | 25.622458 |
| C | -3.921217 | 1.427199  | 25.622458 |
| C | -3.196599 | 2.682274  | 25.622458 |
| C | -0.724618 | 4.109473  | 25.622458 |
| C | 0.724618  | 4.109473  | 25.622458 |
| C | 3.196599  | 2.682274  | 25.622458 |
| C | 3.921217  | 1.427199  | 25.622458 |
| C | 3.921217  | -1.427199 | 25.622458 |
| C | 3.196599  | -2.682274 | 25.622458 |
| C | 0.724618  | -4.109473 | 25.622458 |
| C | -0.724618 | -4.109473 | 25.622458 |
| C | -4.103836 | -0.719544 | 26.874917 |
| C | -4.103836 | 0.719544  | 26.874917 |
| C | -2.675061 | 3.194254  | 26.874917 |
| C | -1.428775 | 3.913798  | 26.874917 |
| C | 1.428775  | 3.913798  | 26.874917 |
| C | 2.675061  | 3.194254  | 26.874917 |
| C | 4.103836  | 0.719544  | 26.874917 |
| C | 4.103836  | -0.719544 | 26.874917 |
| C | 2.675061  | -3.194254 | 26.874917 |
| C | 1.428775  | -3.913798 | 26.874917 |
| C | -1.428775 | -3.913798 | 26.874917 |
| C | -2.675061 | -3.194254 | 26.874917 |
| C | -3.920265 | 1.426732  | 28.128831 |
| C | -3.195719 | 2.681683  | 28.128831 |
| C | -0.724546 | 4.108416  | 28.128831 |
| C | 0.724546  | 4.108416  | 28.128831 |
| C | 3.195719  | 2.681683  | 28.128831 |
| C | 3.920265  | 1.426732  | 28.128831 |
| C | 3.920265  | -1.426732 | 28.128831 |
| C | 3.195719  | -2.681683 | 28.128831 |
| C | 0.724546  | -4.108416 | 28.128831 |
| C | -0.724546 | -4.108416 | 28.128831 |
| C | -3.195719 | -2.681683 | 28.128831 |
| C | -3.920265 | -1.426732 | 28.128831 |
| C | -2.680490 | 3.192545  | 29.371911 |
| C | -1.424580 | 3.917645  | 29.371911 |
| C | 1.424580  | 3.917645  | 29.371911 |
| C | 2.680490  | 3.192545  | 29.371911 |
| C | 4.105070  | 0.725100  | 29.371911 |
| C | 4.105070  | -0.725100 | 29.371911 |
| C | 2.680490  | -3.192545 | 29.371911 |
| C | 1.424580  | -3.917645 | 29.371911 |
| C | -1.424580 | -3.917645 | 29.371911 |
| C | -2.680490 | -3.192545 | 29.371911 |
| C | -4.105070 | -0.725100 | 29.371911 |
| C | -4.105070 | 0.725100  | 29.371911 |
| C | -0.715739 | 4.088157  | 30.623937 |
| C | 0.715739  | 4.088157  | 30.623937 |
| C | 3.182578  | 2.663927  | 30.623937 |
| C | 3.898318  | 1.424230  | 30.623937 |
| C | 3.898318  | -1.424230 | 30.623937 |
| C | 3.182578  | -2.663927 | 30.623937 |
| C | 0.715739  | -4.088157 | 30.623937 |

|   |           |           |            |
|---|-----------|-----------|------------|
| C | -0.715739 | -4.088157 | 30.623937  |
| C | -3.182578 | -2.663927 | 30.623937  |
| C | -3.898318 | -1.424230 | 30.623937  |
| C | -3.898318 | 1.424230  | 30.623937  |
| C | -3.182578 | 2.663927  | 30.623937  |
| C | 1.420510  | 3.911805  | 31.886070  |
| C | 2.677467  | 3.186100  | 31.886070  |
| C | 4.097977  | 0.725705  | 31.886070  |
| C | 4.097977  | -0.725705 | 31.886070  |
| C | 2.677467  | -3.186100 | 31.886070  |
| C | 1.420510  | -3.911805 | 31.886070  |
| C | -1.420510 | -3.911805 | 31.886070  |
| C | -2.677467 | -3.186100 | 31.886070  |
| C | -4.097977 | -0.725705 | 31.886070  |
| C | -4.097977 | 0.725705  | 31.886070  |
| C | -2.677467 | 3.186100  | 31.886070  |
| C | -1.420510 | 3.911805  | 31.886070  |
| C | 3.225481  | 2.712162  | 33.126132  |
| C | 3.961542  | 1.437267  | 33.126132  |
| C | 3.961542  | -1.437267 | 33.126132  |
| C | 3.225481  | -2.712162 | 33.126132  |
| C | 0.736061  | -4.149430 | 33.126132  |
| C | -0.736061 | -4.149430 | 33.126132  |
| C | -3.225481 | -2.712162 | 33.126132  |
| C | -3.961542 | -1.437267 | 33.126132  |
| C | -3.961542 | 1.437267  | 33.126132  |
| C | -3.225481 | 2.712162  | 33.126132  |
| C | -0.736061 | 4.149430  | 33.126132  |
| C | 0.736061  | 4.149430  | 33.126132  |
| C | 4.213618  | 0.692686  | 34.340142  |
| C | 4.213618  | -0.692686 | 34.340142  |
| C | 2.706693  | -3.302757 | 34.340142  |
| C | 1.506925  | -3.995443 | 34.340142  |
| C | -1.506925 | -3.995443 | 34.340142  |
| C | -2.706693 | -3.302757 | 34.340142  |
| C | -4.213618 | -0.692686 | 34.340142  |
| C | -4.213618 | 0.692686  | 34.340142  |
| C | -2.706693 | 3.302757  | 34.340142  |
| C | -1.506925 | 3.995443  | 34.340142  |
| C | 1.506925  | 3.995443  | 34.340142  |
| C | 2.706693  | 3.302757  | 34.340142  |
| H | -3.088488 | -3.199501 | -35.297176 |
| H | -4.315094 | -1.074958 | -35.297176 |
| H | -4.315094 | 1.074958  | -35.297176 |
| H | -3.088488 | 3.199501  | -35.297176 |
| H | -1.226606 | 4.274460  | -35.297176 |
| H | 1.226606  | 4.274460  | -35.297176 |
| H | 3.088488  | 3.199501  | -35.297176 |
| H | 4.315094  | 1.074958  | -35.297176 |
| H | 4.315094  | -1.074958 | -35.297176 |
| H | 3.088488  | -3.199501 | -35.297176 |
| H | 1.226606  | -4.274460 | -35.297176 |
| H | -1.226606 | -4.274460 | -35.297176 |
| H | 4.274460  | 1.226606  | 35.297176  |
| H | 4.274460  | -1.226606 | 35.297176  |
| H | 3.199501  | -3.088488 | 35.297176  |
| H | 1.074958  | -4.315094 | 35.297176  |
| H | -1.074958 | -4.315094 | 35.297176  |
| H | -3.199501 | -3.088488 | 35.297176  |
| H | -4.274460 | -1.226606 | 35.297176  |
| H | -4.274460 | 1.226606  | 35.297176  |
| H | -3.199501 | 3.088488  | 35.297176  |
| H | -1.074958 | 4.315094  | 35.297176  |
| H | 1.074958  | 4.315094  | 35.297176  |
| H | 3.199501  | 3.088488  | 35.297176  |

Nanotube (6,6) u28v6s  
B3LYP/STO-3G Energy: -25765.191056

|   |             |             |             |
|---|-------------|-------------|-------------|
| C | -3.88941136 | 1.75864930  | 34.94165843 |
| C | -4.24765369 | 0.42167071  | 34.94165843 |
| C | -3.46774064 | -2.48900439 | 34.94165843 |
| C | -2.48900439 | -3.46774064 | 34.94165843 |
| C | 0.42167071  | -4.24765369 | 34.94165843 |
| C | 1.75864930  | -3.88941136 | 34.94165843 |
| C | 3.88941136  | -1.75864930 | 34.94165843 |
| C | 4.24765369  | -0.42167071 | 34.94165843 |
| C | 3.46774064  | 2.48900439  | 34.94165843 |
| C | 2.48900439  | 3.46774064  | 34.94165843 |
| C | -0.42167071 | 4.24765369  | 34.94165843 |
| C | -1.75864930 | 3.88941136  | 34.94165843 |
| C | -4.19695158 | -0.36364545 | 33.72631664 |
| C | -3.81648941 | -1.78354959 | 33.72631664 |
| C | -1.78354959 | -3.81648941 | 33.72631664 |
| C | -0.36364545 | -4.19695158 | 33.72631664 |
| C | 2.41340199  | -3.45284396 | 33.72631664 |
| C | 3.45284396  | -2.41340199 | 33.72631664 |
| C | 4.19695158  | 0.36364545  | 33.72631664 |
| C | 3.81648941  | 1.78354959  | 33.72631664 |
| C | 1.78354959  | 3.81648941  | 33.72631664 |
| C | 0.36364545  | 4.19695158  | 33.72631664 |
| C | -2.41340199 | 3.45284396  | 33.72631664 |
| C | -3.45284396 | 2.41340199  | 33.72631664 |
| C | -3.41176949 | -2.38505530 | 32.48679072 |
| C | -2.38505530 | -3.41176949 | 32.48679072 |
| C | 0.35963374  | -4.14720670 | 32.48679072 |
| C | 1.76215140  | -3.77140323 | 32.48679072 |
| C | 3.77140323  | -1.76215140 | 32.48679072 |
| C | 4.14720670  | -0.35963374 | 32.48679072 |
| C | 3.41176949  | 2.38505530  | 32.48679072 |
| C | 2.38505530  | 3.41176949  | 32.48679072 |
| C | -0.35963374 | 4.14720670  | 32.48679072 |
| C | -1.76215140 | 3.77140323  | 32.48679072 |
| C | -3.77140323 | 1.76215140  | 32.48679072 |
| C | -4.14720670 | 0.35963374  | 32.48679072 |
| C | -1.74879357 | -3.76301661 | 31.22630687 |
| C | -0.36700865 | -4.13326476 | 31.22630687 |
| C | 2.38447120  | -3.39600796 | 31.22630687 |
| C | 3.39600796  | -2.38447120 | 31.22630687 |
| C | 4.13326476  | 0.36700865  | 31.22630687 |
| C | 3.76301661  | 1.74879357  | 31.22630687 |
| C | 1.74879357  | 3.76301661  | 31.22630687 |
| C | 0.36700865  | 4.13326476  | 31.22630687 |
| C | -2.38447120 | 3.39600796  | 31.22630687 |
| C | -3.39600796 | 2.38447120  | 31.22630687 |
| C | -4.13326476 | -0.36700865 | 31.22630687 |
| C | -3.76301661 | -1.74879357 | 31.22630687 |
| C | 0.36292154  | -4.15182685 | 29.97364364 |
| C | 1.76161415  | -3.77704829 | 29.97364364 |
| C | 3.77704829  | -1.76161415 | 29.97364364 |
| C | 4.15182685  | -0.36292154 | 29.97364364 |
| C | 3.41412675  | 2.39021270  | 29.97364364 |
| C | 2.39021270  | 3.41412675  | 29.97364364 |
| C | -0.36292154 | 4.15182685  | 29.97364364 |
| C | -1.76161415 | 3.77704829  | 29.97364364 |
| C | -3.77704829 | 1.76161415  | 29.97364364 |
| C | -4.15182685 | 0.36292154  | 29.97364364 |
| C | -3.41412675 | -2.39021270 | 29.97364364 |
| C | -2.39021270 | -3.41412675 | 29.97364364 |
| C | 2.39265223  | -3.41775676 | 28.73090207 |
| C | 3.41775676  | -2.39265223 | 28.73090207 |
| C | 4.15619029  | 0.36321923  | 28.73090207 |
| C | 3.78097599  | 1.76353806  | 28.73090207 |
| C | 1.76353806  | 3.78097599  | 28.73090207 |
| C | 0.36321923  | 4.15619029  | 28.73090207 |
| C | -2.39265223 | 3.41775676  | 28.73090207 |
| C | -3.41775676 | 2.39265223  | 28.73090207 |
| C | -4.15619029 | -0.36321923 | 28.73090207 |

|   |             |             |             |
|---|-------------|-------------|-------------|
| C | -3.78097599 | -1.76353806 | 28.73090207 |
| C | -1.76353806 | -3.78097599 | 28.73090207 |
| C | -0.36321923 | -4.15619029 | 28.73090207 |
| C | 3.77793710  | -1.75690267 | 27.47850149 |
| C | 4.15024084  | -0.36744621 | 27.47850149 |
| C | 3.41049089  | 2.39333817  | 27.47850149 |
| C | 2.39333817  | 3.41049089  | 27.47850149 |
| C | -0.36744621 | 4.15024084  | 27.47850149 |
| C | -1.75690267 | 3.77793710  | 27.47850149 |
| C | -3.77793710 | 1.75690267  | 27.47850149 |
| C | -4.15024084 | 0.36744621  | 27.47850149 |
| C | -3.41049089 | -2.39333817 | 27.47850149 |
| C | -2.39333817 | -3.41049089 | 27.47850149 |
| C | 0.36744621  | -4.15024084 | 27.47850149 |
| C | 1.75690267  | -3.77793710 | 27.47850149 |
| C | 4.15658098  | 0.36473743  | 26.22524394 |
| C | 3.78207344  | 1.76241861  | 26.22524394 |
| C | 1.76241861  | 3.78207344  | 26.22524394 |
| C | 0.36473743  | 4.15658098  | 26.22524394 |
| C | -2.39416238 | 3.41733601  | 26.22524394 |
| C | -3.41733601 | 2.39416238  | 26.22524394 |
| C | -4.15658098 | -0.36473743 | 26.22524394 |
| C | -3.78207344 | -1.76241861 | 26.22524394 |
| C | -1.76241861 | -3.78207344 | 26.22524394 |
| C | -0.36473743 | -4.15658098 | 26.22524394 |
| C | 2.39416238  | -3.41733601 | 26.22524394 |
| C | 3.41733601  | -2.39416238 | 26.22524394 |
| C | 3.41980045  | 2.39421346  | 24.98078025 |
| C | 2.39421346  | 3.41980045  | 24.98078025 |
| C | -0.36354945 | 4.15874080  | 24.98078025 |
| C | -1.76452734 | 3.78334990  | 24.98078025 |
| C | -3.78334990 | 1.76452734  | 24.98078025 |
| C | -4.15874080 | 0.36354945  | 24.98078025 |
| C | -3.41980045 | -2.39421346 | 24.98078025 |
| C | -2.39421346 | -3.41980045 | 24.98078025 |
| C | 0.36354945  | -4.15874080 | 24.98078025 |
| C | 1.76452734  | -3.78334990 | 24.98078025 |
| C | 3.78334990  | -1.76452734 | 24.98078025 |
| C | 4.15874080  | -0.36354945 | 24.98078025 |
| C | 1.75799562  | 3.77816201  | 23.73064064 |
| C | 0.36661214  | 4.15098209  | 23.73064064 |
| C | -2.39298647 | 3.41154987  | 23.73064064 |
| C | -3.41154987 | 2.39298647  | 23.73064064 |
| C | -4.15098209 | -0.36661214 | 23.73064064 |
| C | -3.77816201 | -1.75799562 | 23.73064064 |
| C | -1.75799562 | -3.77816201 | 23.73064064 |
| C | -0.36661214 | -4.15098209 | 23.73064064 |
| C | 2.39298647  | -3.41154987 | 23.73064064 |
| C | 3.41154987  | -2.39298647 | 23.73064064 |
| C | 4.15098209  | 0.36661214  | 23.73064064 |
| C | 3.77816201  | 1.75799562  | 23.73064064 |
| C | -0.36501888 | 4.15376767  | 22.47734423 |
| C | -1.76076821 | 3.77977776  | 22.47734423 |
| C | -3.77977776 | 1.76076821  | 22.47734423 |
| C | -4.15376767 | 0.36501888  | 22.47734423 |
| C | -3.41475888 | -2.39299946 | 22.47734423 |
| C | -2.39299946 | -3.41475888 | 22.47734423 |
| C | 0.36501888  | -4.15376767 | 22.47734423 |
| C | 1.76076821  | -3.77977776 | 22.47734423 |
| C | 3.77977776  | -1.76076821 | 22.47734423 |
| C | 4.15376767  | -0.36501888 | 22.47734423 |
| C | 3.41475888  | 2.39299946  | 22.47734423 |
| C | 2.39299946  | 3.41475888  | 22.47734423 |
| C | -2.39355693 | 3.41881014  | 21.23152596 |
| C | -3.41881014 | 2.39355693  | 21.23152596 |
| C | -4.15755489 | -0.36347603 | 21.23152596 |
| C | -3.78228617 | -1.76399797 | 21.23152596 |
| C | -1.76399797 | -3.78228617 | 21.23152596 |
| C | -0.36347603 | -4.15755489 | 21.23152596 |
| C | 2.39355693  | -3.41881014 | 21.23152596 |

|   |             |             |             |
|---|-------------|-------------|-------------|
| C | 3.41881014  | -2.39355693 | 21.23152596 |
| C | 4.15755489  | 0.36347603  | 21.23152596 |
| C | 3.78228617  | 1.76399797  | 21.23152596 |
| C | 1.76399797  | 3.78228617  | 21.23152596 |
| C | 0.36347603  | 4.15755489  | 21.23152596 |
| C | -3.77901722 | 1.75890450  | 19.98312379 |
| C | -4.15217716 | 0.36625263  | 19.98312379 |
| C | -3.41276459 | -2.39327266 | 19.98312379 |
| C | -2.39327266 | -3.41276459 | 19.98312379 |
| C | 0.36625263  | -4.15217716 | 19.98312379 |
| C | 1.75890450  | -3.77901722 | 19.98312379 |
| C | 3.77901722  | -1.75890450 | 19.98312379 |
| C | 4.15217716  | -0.36625263 | 19.98312379 |
| C | 3.41276459  | 2.39327266  | 19.98312379 |
| C | 2.39327266  | 3.41276459  | 19.98312379 |
| C | -0.36625263 | 4.15217716  | 19.98312379 |
| C | -1.75890450 | 3.77901722  | 19.98312379 |
| C | -4.15402385 | -0.36560937 | 18.73021709 |
| C | -3.78029487 | -1.76038493 | 18.73021709 |
| C | -1.76038493 | -3.78029487 | 18.73021709 |
| C | -0.36560937 | -4.15402385 | 18.73021709 |
| C | 2.39363892  | -3.41468550 | 18.73021709 |
| C | 3.41468550  | -2.39363892 | 18.73021709 |
| C | 4.15402385  | 0.36560937  | 18.73021709 |
| C | 3.78029487  | 1.76038493  | 18.73021709 |
| C | 1.76038493  | 3.78029487  | 18.73021709 |
| C | 0.36560937  | 4.15402385  | 18.73021709 |
| C | -2.39363892 | 3.41468550  | 18.73021709 |
| C | -3.41468550 | 2.39363892  | 18.73021709 |
| C | -3.41889961 | -2.39368852 | 17.48371692 |
| C | -2.39368852 | -3.41889961 | 17.48371692 |
| C | 0.36354526  | -4.15769818 | 17.48371692 |
| C | 1.76400966  | -3.78244487 | 17.48371692 |
| C | 3.78244487  | -1.76400966 | 17.48371692 |
| C | 4.15769818  | -0.36354526 | 17.48371692 |
| C | 3.41889961  | 2.39368852  | 17.48371692 |
| C | 2.39368852  | 3.41889961  | 17.48371692 |
| C | -0.36354526 | 4.15769818  | 17.48371692 |
| C | -1.76400966 | 3.78244487  | 17.48371692 |
| C | -3.78244487 | 1.76400966  | 17.48371692 |
| C | -4.15769818 | 0.36354526  | 17.48371692 |
| C | -1.75938826 | -3.77877258 | 16.23606353 |
| C | -0.36571136 | -4.15220718 | 16.23606353 |
| C | 2.39281892  | -3.41306122 | 16.23606353 |
| C | 3.41306122  | -2.39281892 | 16.23606353 |
| C | 4.15220718  | 0.36571136  | 16.23606353 |
| C | 3.77877258  | 1.75938826  | 16.23606353 |
| C | 1.75938826  | 3.77877258  | 16.23606353 |
| C | 0.36571136  | 4.15220718  | 16.23606353 |
| C | -2.39281892 | 3.41306122  | 16.23606353 |
| C | -3.41306122 | 2.39281892  | 16.23606353 |
| C | -4.15220718 | -0.36571136 | 16.23606353 |
| C | -3.77877258 | -1.75938826 | 16.23606353 |
| C | 0.36574799  | -4.15258673 | 14.98316618 |
| C | 1.75954631  | -3.77911960 | 14.98316618 |
| C | 3.77911960  | -1.75954631 | 14.98316618 |
| C | 4.15258673  | -0.36574799 | 14.98316618 |
| C | 3.41337160  | 2.39304042  | 14.98316618 |
| C | 2.39304042  | 3.41337160  | 14.98316618 |
| C | -0.36574799 | 4.15258673  | 14.98316618 |
| C | -1.75954631 | 3.77911960  | 14.98316618 |
| C | -3.77911960 | 1.75954631  | 14.98316618 |
| C | -4.15258673 | 0.36574799  | 14.98316618 |
| C | -3.41337160 | -2.39304042 | 14.98316618 |
| C | -2.39304042 | -3.41337160 | 14.98316618 |
| C | 2.39378090  | -3.41881634 | 13.73573022 |
| C | 3.41881634  | -2.39378090 | 13.73573022 |
| C | 4.15767225  | 0.36366690  | 13.73573022 |
| C | 3.78248324  | 1.76389135  | 13.73573022 |
| C | 1.76389135  | 3.78248324  | 13.73573022 |

|   |             |             |             |
|---|-------------|-------------|-------------|
| C | 0.36366690  | 4.15767225  | 13.73573022 |
| C | -2.39378090 | 3.41881634  | 13.73573022 |
| C | -3.41881634 | 2.39378090  | 13.73573022 |
| C | -4.15767225 | -0.36366690 | 13.73573022 |
| C | -3.78248324 | -1.76389135 | 13.73573022 |
| C | -1.76389135 | -3.78248324 | 13.73573022 |
| C | -0.36366690 | -4.15767225 | 13.73573022 |
| C | 3.77991556  | -1.76026343 | 12.48912396 |
| C | 4.15363461  | -0.36552493 | 12.48912396 |
| C | 3.41439062  | 2.39337118  | 12.48912396 |
| C | 2.39337118  | 3.41439062  | 12.48912396 |
| C | -0.36552493 | 4.15363461  | 12.48912396 |
| C | -1.76026343 | 3.77991556  | 12.48912396 |
| C | -3.77991556 | 1.76026343  | 12.48912396 |
| C | -4.15363461 | 0.36552493  | 12.48912396 |
| C | -3.41439062 | -2.39337118 | 12.48912396 |
| C | -2.39337118 | -3.41439062 | 12.48912396 |
| C | 0.36552493  | -4.15363461 | 12.48912396 |
| C | 1.76026343  | -3.77991556 | 12.48912396 |
| C | 4.15208913  | 0.36601822  | 11.23698564 |
| C | 3.77882377  | 1.75906349  | 11.23698564 |
| C | 1.75906349  | 3.77882377  | 11.23698564 |
| C | 0.36601822  | 4.15208913  | 11.23698564 |
| C | -2.39302564 | 3.41280556  | 11.23698564 |
| C | -3.41280556 | 2.39302564  | 11.23698564 |
| C | -4.15208913 | -0.36601822 | 11.23698564 |
| C | -3.77882377 | -1.75906349 | 11.23698564 |
| C | -1.75906349 | -3.77882377 | 11.23698564 |
| C | -0.36601822 | -4.15208913 | 11.23698564 |
| C | 2.39302564  | -3.41280556 | 11.23698564 |
| C | 3.41280556  | -2.39302564 | 11.23698564 |
| C | 3.41815185  | 2.39345823  | 9.98891213  |
| C | 2.39345823  | 3.41815185  | 9.98891213  |
| C | -0.36371971 | 4.15693545  | 9.98891213  |
| C | -1.76347722 | 3.78187156  | 9.98891213  |
| C | -3.78187156 | 1.76347722  | 9.98891213  |
| C | -4.15693545 | 0.36371971  | 9.98891213  |
| C | -3.41815185 | -2.39345823 | 9.98891213  |
| C | -2.39345823 | -3.41815185 | 9.98891213  |
| C | 0.36371971  | -4.15693545 | 9.98891213  |
| C | 1.76347722  | -3.78187156 | 9.98891213  |
| C | 3.78187156  | -1.76347722 | 9.98891213  |
| C | 4.15693545  | -0.36371971 | 9.98891213  |
| C | 1.76100782  | 3.78045363  | 8.74295540  |
| C | 0.36514931  | 4.15447279  | 8.74295540  |
| C | -2.39346497 | 3.41530432  | 8.74295540  |
| C | -3.41530432 | 2.39346497  | 8.74295540  |
| C | -4.15447279 | -0.36514931 | 8.74295540  |
| C | -3.78045363 | -1.76100782 | 8.74295540  |
| C | -1.76100782 | -3.78045363 | 8.74295540  |
| C | -0.36514931 | -4.15447279 | 8.74295540  |
| C | 2.39346497  | -3.41530432 | 8.74295540  |
| C | 3.41530432  | -2.39346497 | 8.74295540  |
| C | 4.15447279  | 0.36514931  | 8.74295540  |
| C | 3.78045363  | 1.76100782  | 8.74295540  |
| C | -0.36624216 | 4.15227594  | 7.49118233  |
| C | -1.75896295 | 3.77909753  | 7.49118233  |
| C | -3.77909753 | 1.75896295  | 7.49118233  |
| C | -4.15227594 | 0.36624216  | 7.49118233  |
| C | -3.41285537 | -2.39331299 | 7.49118233  |
| C | -2.39331299 | -3.41285537 | 7.49118233  |
| C | 0.36624216  | -4.15227594 | 7.49118233  |
| C | 1.75896295  | -3.77909753 | 7.49118233  |
| C | 3.77909753  | -1.75896295 | 7.49118233  |
| C | 4.15227594  | -0.36624216 | 7.49118233  |
| C | 3.41285537  | 2.39331299  | 7.49118233  |
| C | 2.39331299  | 3.41285537  | 7.49118233  |
| C | -2.39361735 | 3.41798969  | 6.24229149  |
| C | -3.41798969 | 2.39361735  | 6.24229149  |
| C | -4.15687458 | -0.36393859 | 6.24229149  |

|   |             |             |             |
|---|-------------|-------------|-------------|
| C | -3.78192828 | -1.76325722 | 6.24229149  |
| C | -1.76325722 | -3.78192828 | 6.24229149  |
| C | -0.36393859 | -4.15687458 | 6.24229149  |
| C | 2.39361735  | -3.41798969 | 6.24229149  |
| C | 3.41798969  | -2.39361735 | 6.24229149  |
| C | 4.15687458  | 0.36393859  | 6.24229149  |
| C | 3.78192828  | 1.76325722  | 6.24229149  |
| C | 1.76325722  | 3.78192828  | 6.24229149  |
| C | 0.36393859  | 4.15687458  | 6.24229149  |
| C | -3.78100209 | 1.76169531  | 4.99674541  |
| C | -4.15529152 | 0.36482816  | 4.99674541  |
| C | -3.41617394 | -2.39359621 | 4.99674541  |
| C | -2.39359621 | -3.41617394 | 4.99674541  |
| C | 0.36482816  | -4.15529152 | 4.99674541  |
| C | 1.76169531  | -3.78100209 | 4.99674541  |
| C | 3.78100209  | -1.76169531 | 4.99674541  |
| C | 4.15529152  | -0.36482816 | 4.99674541  |
| C | 3.41617394  | 2.39359621  | 4.99674541  |
| C | 2.39359621  | 3.41617394  | 4.99674541  |
| C | -0.36482816 | 4.15529152  | 4.99674541  |
| C | -1.76169531 | 3.78100209  | 4.99674541  |
| C | -4.15229620 | -0.36636891 | 3.74575547  |
| C | -3.77917845 | -1.75886332 | 3.74575547  |
| C | -1.75886332 | -3.77917845 | 3.74575547  |
| C | -0.36636891 | -4.15229620 | 3.74575547  |
| C | 2.39343288  | -3.41280954 | 3.74575547  |
| C | 3.41280954  | -2.39343288 | 3.74575547  |
| C | 4.15229620  | 0.36636891  | 3.74575547  |
| C | 3.77917845  | 1.75886332  | 3.74575547  |
| C | 1.75886332  | 3.77917845  | 3.74575547  |
| C | 0.36636891  | 4.15229620  | 3.74575547  |
| C | -2.39343288 | 3.41280954  | 3.74575547  |
| C | -3.41280954 | 2.39343288  | 3.74575547  |
| C | -3.41766145 | -2.39380776 | 2.49623543  |
| C | -2.39380776 | -3.41766145 | 2.49623543  |
| C | 0.36426761  | -4.15668552 | 2.49623543  |
| C | 1.76287776  | -3.78192906 | 2.49623543  |
| C | 3.78192906  | -1.76287776 | 2.49623543  |
| C | 4.15668552  | -0.36426761 | 2.49623543  |
| C | 3.41766145  | 2.39380776  | 2.49623543  |
| C | 2.39380776  | 3.41766145  | 2.49623543  |
| C | -0.36426761 | 4.15668552  | 2.49623543  |
| C | -1.76287776 | 3.78192906  | 2.49623543  |
| C | -3.78192906 | 1.76287776  | 2.49623543  |
| C | -4.15668552 | 0.36426761  | 2.49623543  |
| C | -1.76236487 | -3.78163948 | 1.25064046  |
| C | -0.36456699 | -4.15617829 | 1.25064046  |
| C | 2.39381342  | -3.41707249 | 1.25064046  |
| C | 3.41707249  | -2.39381342 | 1.25064046  |
| C | 4.15617829  | 0.36456699  | 1.25064046  |
| C | 3.78163948  | 1.76236487  | 1.25064046  |
| C | 1.76236487  | 3.78163948  | 1.25064046  |
| C | 0.36456699  | 4.15617829  | 1.25064046  |
| C | -2.39381342 | 3.41707249  | 1.25064046  |
| C | -3.41707249 | 2.39381342  | 1.25064046  |
| C | -4.15617829 | -0.36456699 | 1.25064046  |
| C | -3.78163948 | -1.76236487 | 1.25064046  |
| C | 0.36642843  | -4.15239711 | 0.00000000  |
| C | 1.75886222  | -3.77929560 | 0.00000000  |
| C | 3.77929560  | -1.75886222 | 0.00000000  |
| C | 4.15239711  | -0.36642843 | 0.00000000  |
| C | 3.41286717  | 2.39353489  | 0.00000000  |
| C | 2.39353489  | 3.41286717  | 0.00000000  |
| C | -0.36642843 | 4.15239711  | 0.00000000  |
| C | -1.75886222 | 3.77929560  | 0.00000000  |
| C | -3.77929560 | 1.75886222  | 0.00000000  |
| C | -4.15239711 | 0.36642843  | 0.00000000  |
| C | -3.41286717 | -2.39353489 | 0.00000000  |
| C | -2.39353489 | -3.41286717 | 0.00000000  |
| C | 2.39381342  | -3.41707249 | -1.25064046 |



|   |             |             |             |
|---|-------------|-------------|-------------|
| C | 3.41707249  | -2.39381342 | -1.25064046 |
| C | 4.15617829  | 0.36456699  | -1.25064046 |
| C | 3.78163948  | 1.76236487  | -1.25064046 |
| C | 1.76236487  | 3.78163948  | -1.25064046 |
| C | 0.36456699  | 4.15617829  | -1.25064046 |
| C | -2.39381342 | 3.41707249  | -1.25064046 |
| C | -3.41707249 | 2.39381342  | -1.25064046 |
| C | -4.15617829 | -0.36456699 | -1.25064046 |
| C | -3.78163948 | -1.76236487 | -1.25064046 |
| C | -1.76236487 | -3.78163948 | -1.25064046 |
| C | -0.36456699 | -4.15617829 | -1.25064046 |
| C | 3.78192906  | -1.76287776 | -2.49623543 |
| C | 4.15668552  | -0.36426761 | -2.49623543 |
| C | 3.41766145  | 2.39380776  | -2.49623543 |
| C | 2.39380776  | 3.41766145  | -2.49623543 |
| C | -0.36426761 | 4.15668552  | -2.49623543 |
| C | -1.76287776 | 3.78192906  | -2.49623543 |
| C | -3.78192906 | 1.76287776  | -2.49623543 |
| C | -4.15668552 | 0.36426761  | -2.49623543 |
| C | -3.41766145 | -2.39380776 | -2.49623543 |
| C | -2.39380776 | -3.41766145 | -2.49623543 |
| C | 0.36426761  | -4.15668552 | -2.49623543 |
| C | 1.76287776  | -3.78192906 | -2.49623543 |
| C | 4.15229620  | 0.36636891  | -3.74575547 |
| C | 3.77917845  | 1.75886332  | -3.74575547 |
| C | 1.75886332  | 3.77917845  | -3.74575547 |
| C | 0.36636891  | 4.15229620  | -3.74575547 |
| C | -2.39343288 | 3.41280954  | -3.74575547 |
| C | -3.41280954 | 2.39343288  | -3.74575547 |
| C | -4.15229620 | -0.36636891 | -3.74575547 |
| C | -3.77917845 | -1.75886332 | -3.74575547 |
| C | -1.75886332 | -3.77917845 | -3.74575547 |
| C | -0.36636891 | -4.15229620 | -3.74575547 |
| C | 2.39343288  | -3.41280954 | -3.74575547 |
| C | 3.41280954  | -2.39343288 | -3.74575547 |
| C | 3.41617394  | 2.39359621  | -4.99674541 |
| C | 2.39359621  | 3.41617394  | -4.99674541 |
| C | -0.36482816 | 4.15529152  | -4.99674541 |
| C | -1.76169531 | 3.78100209  | -4.99674541 |
| C | -3.78100209 | 1.76169531  | -4.99674541 |
| C | -4.15529152 | 0.36482816  | -4.99674541 |
| C | -3.41617394 | -2.39359621 | -4.99674541 |
| C | -2.39359621 | -3.41617394 | -4.99674541 |
| C | 0.36482816  | -4.15529152 | -4.99674541 |
| C | 1.76169531  | -3.78100209 | -4.99674541 |
| C | 3.78100209  | -1.76169531 | -4.99674541 |
| C | 4.15529152  | -0.36482816 | -4.99674541 |
| C | 1.76325722  | 3.78192828  | -6.24229149 |
| C | 0.36393859  | 4.15687458  | -6.24229149 |
| C | -2.39361735 | 3.41798969  | -6.24229149 |
| C | -3.41798969 | 2.39361735  | -6.24229149 |
| C | -4.15687458 | -0.36393859 | -6.24229149 |
| C | -3.78192828 | -1.76325722 | -6.24229149 |
| C | -1.76325722 | -3.78192828 | -6.24229149 |
| C | -0.36393859 | -4.15687458 | -6.24229149 |
| C | 2.39361735  | -3.41798969 | -6.24229149 |
| C | 3.41798969  | -2.39361735 | -6.24229149 |
| C | 4.15687458  | 0.36393859  | -6.24229149 |
| C | 3.78192828  | 1.76325722  | -6.24229149 |
| C | -0.36624216 | 4.15227594  | -7.49118233 |
| C | -1.75896295 | 3.77909753  | -7.49118233 |
| C | -3.77909753 | 1.75896295  | -7.49118233 |
| C | -4.15227594 | 0.36624216  | -7.49118233 |
| C | -3.41285537 | -2.39331299 | -7.49118233 |
| C | -2.39331299 | -3.41285537 | -7.49118233 |
| C | 0.36624216  | -4.15227594 | -7.49118233 |
| C | 1.75896295  | -3.77909753 | -7.49118233 |
| C | 3.77909753  | -1.75896295 | -7.49118233 |
| C | 4.15227594  | -0.36624216 | -7.49118233 |
| C | 3.41285537  | 2.39331299  | -7.49118233 |

|   |             |             |              |
|---|-------------|-------------|--------------|
| C | 2.39331299  | 3.41285537  | -7.49118233  |
| C | -2.39346497 | 3.41530432  | -8.74295540  |
| C | -3.41530432 | 2.39346497  | -8.74295540  |
| C | -4.15447279 | -0.36514931 | -8.74295540  |
| C | -3.78045363 | -1.76100782 | -8.74295540  |
| C | -1.76100782 | -3.78045363 | -8.74295540  |
| C | -0.36514931 | -4.15447279 | -8.74295540  |
| C | 2.39346497  | -3.41530432 | -8.74295540  |
| C | 3.41530432  | -2.39346497 | -8.74295540  |
| C | 4.15447279  | 0.36514931  | -8.74295540  |
| C | 3.78045363  | 1.76100782  | -8.74295540  |
| C | 1.76100782  | 3.78045363  | -8.74295540  |
| C | 0.36514931  | 4.15447279  | -8.74295540  |
| C | -3.78187156 | 1.76347722  | -9.98891213  |
| C | -4.15693545 | 0.36371971  | -9.98891213  |
| C | -3.41815185 | -2.39345823 | -9.98891213  |
| C | -2.39345823 | -3.41815185 | -9.98891213  |
| C | 0.36371971  | -4.15693545 | -9.98891213  |
| C | 1.76347722  | -3.78187156 | -9.98891213  |
| C | 3.78187156  | -1.76347722 | -9.98891213  |
| C | 4.15693545  | -0.36371971 | -9.98891213  |
| C | 3.41815185  | 2.39345823  | -9.98891213  |
| C | 2.39345823  | 3.41815185  | -9.98891213  |
| C | -0.36371971 | 4.15693545  | -9.98891213  |
| C | -1.76347722 | 3.78187156  | -9.98891213  |
| C | -4.15208913 | -0.36601822 | -11.23698564 |
| C | -3.77882377 | -1.75906349 | -11.23698564 |
| C | -1.75906349 | -3.77882377 | -11.23698564 |
| C | -0.36601822 | -4.15208913 | -11.23698564 |
| C | 2.39302564  | -3.41280556 | -11.23698564 |
| C | 3.41280556  | -2.39302564 | -11.23698564 |
| C | 4.15208913  | 0.36601822  | -11.23698564 |
| C | 3.77882377  | 1.75906349  | -11.23698564 |
| C | 1.75906349  | 3.77882377  | -11.23698564 |
| C | 0.36601822  | 4.15208913  | -11.23698564 |
| C | -2.39302564 | 3.41280556  | -11.23698564 |
| C | -3.41280556 | 2.39302564  | -11.23698564 |
| C | -3.41439062 | -2.39337118 | -12.48912396 |
| C | -2.39337118 | -3.41439062 | -12.48912396 |
| C | 0.36552493  | -4.15363461 | -12.48912396 |
| C | 1.76026343  | -3.77991556 | -12.48912396 |
| C | 3.77991556  | -1.76026343 | -12.48912396 |
| C | 4.15363461  | -0.36552493 | -12.48912396 |
| C | 3.41439062  | 2.39337118  | -12.48912396 |
| C | 2.39337118  | 3.41439062  | -12.48912396 |
| C | -0.36552493 | 4.15363461  | -12.48912396 |
| C | -1.76026343 | 3.77991556  | -12.48912396 |
| C | -3.77991556 | 1.76026343  | -12.48912396 |
| C | -4.15363461 | 0.36552493  | -12.48912396 |
| C | -1.76389135 | -3.78248324 | -13.73573022 |
| C | -0.36366690 | -4.15767225 | -13.73573022 |
| C | 2.39378090  | -3.41881634 | -13.73573022 |
| C | 3.41881634  | -2.39378090 | -13.73573022 |
| C | 4.15767225  | 0.36366690  | -13.73573022 |
| C | 3.78248324  | 1.76389135  | -13.73573022 |
| C | 1.76389135  | 3.78248324  | -13.73573022 |
| C | 0.36366690  | 4.15767225  | -13.73573022 |
| C | -2.39378090 | 3.41881634  | -13.73573022 |
| C | -3.41881634 | 2.39378090  | -13.73573022 |
| C | -4.15767225 | -0.36366690 | -13.73573022 |
| C | -3.78248324 | -1.76389135 | -13.73573022 |
| C | 0.36574799  | -4.15258673 | -14.98316618 |
| C | 1.75954631  | -3.77911960 | -14.98316618 |
| C | 3.77911960  | -1.75954631 | -14.98316618 |
| C | 4.15258673  | -0.36574799 | -14.98316618 |
| C | 3.41337160  | 2.39304042  | -14.98316618 |
| C | 2.39304042  | 3.41337160  | -14.98316618 |
| C | -0.36574799 | 4.15258673  | -14.98316618 |
| C | -1.75954631 | 3.77911960  | -14.98316618 |
| C | -3.77911960 | 1.75954631  | -14.98316618 |

|   |             |             |              |
|---|-------------|-------------|--------------|
| C | -4.15258673 | 0.36574799  | -14.98316618 |
| C | -3.41337160 | -2.39304042 | -14.98316618 |
| C | -2.39304042 | -3.41337160 | -14.98316618 |
| C | 2.39281892  | -3.41306122 | -16.23606353 |
| C | 3.41306122  | -2.39281892 | -16.23606353 |
| C | 4.15220718  | 0.36571136  | -16.23606353 |
| C | 3.77877258  | 1.75938826  | -16.23606353 |
| C | 1.75938826  | 3.77877258  | -16.23606353 |
| C | 0.36571136  | 4.15220718  | -16.23606353 |
| C | -2.39281892 | 3.41306122  | -16.23606353 |
| C | -3.41306122 | 2.39281892  | -16.23606353 |
| C | -4.15220718 | -0.36571136 | -16.23606353 |
| C | -3.77877258 | -1.75938826 | -16.23606353 |
| C | -1.75938826 | -3.77877258 | -16.23606353 |
| C | -0.36571136 | -4.15220718 | -16.23606353 |
| C | 3.78244487  | -1.76400966 | -17.48371692 |
| C | 4.15769818  | -0.36354526 | -17.48371692 |
| C | 3.41889961  | 2.39368852  | -17.48371692 |
| C | 2.39368852  | 3.41889961  | -17.48371692 |
| C | -0.36354526 | 4.15769818  | -17.48371692 |
| C | -1.76400966 | 3.78244487  | -17.48371692 |
| C | -3.78244487 | 1.76400966  | -17.48371692 |
| C | -4.15769818 | 0.36354526  | -17.48371692 |
| C | -3.41889961 | -2.39368852 | -17.48371692 |
| C | -2.39368852 | -3.41889961 | -17.48371692 |
| C | 0.36354526  | -4.15769818 | -17.48371692 |
| C | 1.76400966  | -3.78244487 | -17.48371692 |
| C | 4.15402385  | 0.36560937  | -18.73021709 |
| C | 3.78029487  | 1.76038493  | -18.73021709 |
| C | 1.76038493  | 3.78029487  | -18.73021709 |
| C | 0.36560937  | 4.15402385  | -18.73021709 |
| C | -2.39363892 | 3.41468550  | -18.73021709 |
| C | -3.41468550 | 2.39363892  | -18.73021709 |
| C | -4.15402385 | -0.36560937 | -18.73021709 |
| C | -3.78029487 | -1.76038493 | -18.73021709 |
| C | -1.76038493 | -3.78029487 | -18.73021709 |
| C | -0.36560937 | -4.15402385 | -18.73021709 |
| C | 2.39363892  | -3.41468550 | -18.73021709 |
| C | 3.41468550  | -2.39363892 | -18.73021709 |
| C | 3.41276459  | 2.39327266  | -19.98312379 |
| C | 2.39327266  | 3.41276459  | -19.98312379 |
| C | -0.36625263 | 4.15217716  | -19.98312379 |
| C | -1.75890450 | 3.77901722  | -19.98312379 |
| C | -3.77901722 | 1.75890450  | -19.98312379 |
| C | -4.15217716 | 0.36625263  | -19.98312379 |
| C | -3.41276459 | -2.39327266 | -19.98312379 |
| C | -2.39327266 | -3.41276459 | -19.98312379 |
| C | 0.36625263  | -4.15217716 | -19.98312379 |
| C | 1.75890450  | -3.77901722 | -19.98312379 |
| C | 3.77901722  | -1.75890450 | -19.98312379 |
| C | 4.15217716  | -0.36625263 | -19.98312379 |
| C | 1.76399797  | 3.78228617  | -21.23152596 |
| C | 0.36347603  | 4.15755489  | -21.23152596 |
| C | -2.39355693 | 3.41881014  | -21.23152596 |
| C | -3.41881014 | 2.39355693  | -21.23152596 |
| C | -4.15755489 | -0.36347603 | -21.23152596 |
| C | -3.78228617 | -1.76399797 | -21.23152596 |
| C | -1.76399797 | -3.78228617 | -21.23152596 |
| C | -0.36347603 | -4.15755489 | -21.23152596 |
| C | 2.39355693  | -3.41881014 | -21.23152596 |
| C | 3.41881014  | -2.39355693 | -21.23152596 |
| C | 4.15755489  | 0.36347603  | -21.23152596 |
| C | 3.78228617  | 1.76399797  | -21.23152596 |
| C | -0.36501888 | 4.15376767  | -22.47734423 |
| C | -1.76076821 | 3.77977776  | -22.47734423 |
| C | -3.77977776 | 1.76076821  | -22.47734423 |
| C | -4.15376767 | 0.36501888  | -22.47734423 |
| C | -3.41475888 | -2.39299946 | -22.47734423 |
| C | -2.39299946 | -3.41475888 | -22.47734423 |
| C | 0.36501888  | -4.15376767 | -22.47734423 |

|   |             |             |              |
|---|-------------|-------------|--------------|
| C | 1.76076821  | -3.77977776 | -22.47734423 |
| C | 3.77977776  | -1.76076821 | -22.47734423 |
| C | 4.15376767  | -0.36501888 | -22.47734423 |
| C | 3.41475888  | 2.39299946  | -22.47734423 |
| C | 2.39299946  | 3.41475888  | -22.47734423 |
| C | -2.39298647 | 3.41154987  | -23.73064064 |
| C | -3.41154987 | 2.39298647  | -23.73064064 |
| C | -4.15098209 | -0.36661214 | -23.73064064 |
| C | -3.77816201 | -1.75799562 | -23.73064064 |
| C | -1.75799562 | -3.77816201 | -23.73064064 |
| C | -0.36661214 | -4.15098209 | -23.73064064 |
| C | 2.39298647  | -3.41154987 | -23.73064064 |
| C | 3.41154987  | -2.39298647 | -23.73064064 |
| C | 4.15098209  | 0.36661214  | -23.73064064 |
| C | 3.77816201  | 1.75799562  | -23.73064064 |
| C | 1.75799562  | 3.77816201  | -23.73064064 |
| C | 0.36661214  | 4.15098209  | -23.73064064 |
| C | -3.78334990 | 1.76452734  | -24.98078025 |
| C | -4.15874080 | 0.36354945  | -24.98078025 |
| C | -3.41980045 | -2.39421346 | -24.98078025 |
| C | -2.39421346 | -3.41980045 | -24.98078025 |
| C | 0.36354945  | -4.15874080 | -24.98078025 |
| C | 1.76452734  | -3.78334990 | -24.98078025 |
| C | 3.78334990  | -1.76452734 | -24.98078025 |
| C | 4.15874080  | -0.36354945 | -24.98078025 |
| C | 3.41980045  | 2.39421346  | -24.98078025 |
| C | 2.39421346  | 3.41980045  | -24.98078025 |
| C | -0.36354945 | 4.15874080  | -24.98078025 |
| C | -1.76452734 | 3.78334990  | -24.98078025 |
| C | -4.15658098 | -0.36473743 | -26.22524394 |
| C | -3.78207344 | -1.76241861 | -26.22524394 |
| C | -1.76241861 | -3.78207344 | -26.22524394 |
| C | -0.36473743 | -4.15658098 | -26.22524394 |
| C | 2.39416238  | -3.41733601 | -26.22524394 |
| C | 3.41733601  | -2.39416238 | -26.22524394 |
| C | 4.15658098  | 0.36473743  | -26.22524394 |
| C | 3.78207344  | 1.76241861  | -26.22524394 |
| C | 1.76241861  | 3.78207344  | -26.22524394 |
| C | 0.36473743  | 4.15658098  | -26.22524394 |
| C | -2.39416238 | 3.41733601  | -26.22524394 |
| C | -3.41733601 | 2.39416238  | -26.22524394 |
| C | -3.41049089 | -2.39333817 | -27.47850149 |
| C | -2.39333817 | -3.41049089 | -27.47850149 |
| C | 0.36744621  | -4.15024084 | -27.47850149 |
| C | 1.75690267  | -3.77793710 | -27.47850149 |
| C | 3.77793710  | -1.75690267 | -27.47850149 |
| C | 4.15024084  | -0.36744621 | -27.47850149 |
| C | 3.41049089  | 2.39333817  | -27.47850149 |
| C | 2.39333817  | 3.41049089  | -27.47850149 |
| C | -0.36744621 | 4.15024084  | -27.47850149 |
| C | -1.75690267 | 3.77793710  | -27.47850149 |
| C | -3.77793710 | 1.75690267  | -27.47850149 |
| C | -4.15024084 | 0.36744621  | -27.47850149 |
| C | -1.76353806 | -3.78097599 | -28.73090207 |
| C | -0.36321923 | -4.15619029 | -28.73090207 |
| C | 2.39265223  | -3.41775676 | -28.73090207 |
| C | 3.41775676  | -2.39265223 | -28.73090207 |
| C | 4.15619029  | 0.36321923  | -28.73090207 |
| C | 3.78097599  | 1.76353806  | -28.73090207 |
| C | 1.76353806  | 3.78097599  | -28.73090207 |
| C | 0.36321923  | 4.15619029  | -28.73090207 |
| C | -2.39265223 | 3.41775676  | -28.73090207 |
| C | -3.41775676 | 2.39265223  | -28.73090207 |
| C | -4.15619029 | -0.36321923 | -28.73090207 |
| C | -3.78097599 | -1.76353806 | -28.73090207 |
| C | 0.36292154  | -4.15182685 | -29.97364364 |
| C | 1.76161415  | -3.77704829 | -29.97364364 |
| C | 3.77704829  | -1.76161415 | -29.97364364 |
| C | 4.15182685  | -0.36292154 | -29.97364364 |
| C | 3.41412675  | 2.39021270  | -29.97364364 |

|   |             |             |              |
|---|-------------|-------------|--------------|
| C | 2.39021270  | 3.41412675  | -29.97364364 |
| C | -0.36292154 | 4.15182685  | -29.97364364 |
| C | -1.76161415 | 3.77704829  | -29.97364364 |
| C | -3.77704829 | 1.76161415  | -29.97364364 |
| C | -4.15182685 | 0.36292154  | -29.97364364 |
| C | -3.41412675 | -2.39021270 | -29.97364364 |
| C | -2.39021270 | -3.41412675 | -29.97364364 |
| C | 2.38447120  | -3.39600796 | -31.22630687 |
| C | 3.39600796  | -2.38447120 | -31.22630687 |
| C | 4.13326476  | 0.36700865  | -31.22630687 |
| C | 3.76301661  | 1.74879357  | -31.22630687 |
| C | 1.74879357  | 3.76301661  | -31.22630687 |
| C | 0.36700865  | 4.13326476  | -31.22630687 |
| C | -2.38447120 | 3.39600796  | -31.22630687 |
| C | -3.39600796 | 2.38447120  | -31.22630687 |
| C | -4.13326476 | -0.36700865 | -31.22630687 |
| C | -3.76301661 | -1.74879357 | -31.22630687 |
| C | -1.74879357 | -3.76301661 | -31.22630687 |
| C | -0.36700865 | -4.13326476 | -31.22630687 |
| C | 3.77140323  | -1.76215140 | -32.48679072 |
| C | 4.14720670  | -0.35963374 | -32.48679072 |
| C | 3.41176949  | 2.38505530  | -32.48679072 |
| C | 2.38505530  | 3.41176949  | -32.48679072 |
| C | -0.35963374 | 4.14720670  | -32.48679072 |
| C | -1.76215140 | 3.77140323  | -32.48679072 |
| C | -3.77140323 | 1.76215140  | -32.48679072 |
| C | -4.14720670 | 0.35963374  | -32.48679072 |
| C | -3.41176949 | -2.38505530 | -32.48679072 |
| C | -2.38505530 | -3.41176949 | -32.48679072 |
| C | 0.35963374  | -4.14720670 | -32.48679072 |
| C | 1.76215140  | -3.77140323 | -32.48679072 |
| C | 4.19695158  | 0.36364545  | -33.72631664 |
| C | 3.81648941  | 1.78354959  | -33.72631664 |
| C | 1.78354959  | 3.81648941  | -33.72631664 |
| C | 0.36364545  | 4.19695158  | -33.72631664 |
| C | -2.41340199 | 3.45284396  | -33.72631664 |
| C | -3.45284396 | 2.41340199  | -33.72631664 |
| C | -4.19695158 | -0.36364545 | -33.72631664 |
| C | -3.81648941 | -1.78354959 | -33.72631664 |
| C | -1.78354959 | -3.81648941 | -33.72631664 |
| C | -0.36364545 | -4.19695158 | -33.72631664 |
| C | 2.41340199  | -3.45284396 | -33.72631664 |
| C | 3.45284396  | -2.41340199 | -33.72631664 |
| C | 3.46774064  | 2.48900439  | -34.94165843 |
| C | 2.48900439  | 3.46774064  | -34.94165843 |
| C | -0.42167071 | 4.24765369  | -34.94165843 |
| C | -1.75864930 | 3.88941136  | -34.94165843 |
| C | -3.88941136 | 1.75864930  | -34.94165843 |
| C | -4.24765369 | 0.42167071  | -34.94165843 |
| C | -3.46774064 | -2.48900439 | -34.94165843 |
| C | -2.48900439 | -3.46774064 | -34.94165843 |
| C | 0.42167071  | -4.24765369 | -34.94165843 |
| C | 1.75864930  | -3.88941136 | -34.94165843 |
| C | 3.88941136  | -1.75864930 | -34.94165843 |
| C | 4.24765369  | -0.42167071 | -34.94165843 |
| H | -3.81210926 | 2.29213870  | 35.89772439  |
| H | -4.44745281 | -0.07899571 | 35.89772439  |
| H | -3.89110497 | -2.15531411 | 35.89772439  |
| H | -2.15531411 | -3.89110497 | 35.89772439  |
| H | -0.07899571 | -4.44745281 | 35.89772439  |
| H | 2.29213870  | -3.81210926 | 35.89772439  |
| H | 3.81210926  | -2.29213870 | 35.89772439  |
| H | 4.44745281  | 0.07899571  | 35.89772439  |
| H | 3.89110497  | 2.15531411  | 35.89772439  |
| H | 2.15531411  | 3.89110497  | 35.89772439  |
| H | 0.07899571  | 4.44745281  | 35.89772439  |
| H | -2.29213870 | 3.81210926  | 35.89772439  |
| H | 3.89110497  | 2.15531411  | -35.89772439 |
| H | 2.15531411  | 3.89110497  | -35.89772439 |
| H | 0.07899571  | 4.44745281  | -35.89772439 |

|   |             |             |              |
|---|-------------|-------------|--------------|
| H | -2.29213870 | 3.81210926  | -35.89772439 |
| H | -3.81210926 | 2.29213870  | -35.89772439 |
| H | -4.44745281 | -0.07899571 | -35.89772439 |
| H | -3.89110497 | -2.15531411 | -35.89772439 |
| H | -2.15531411 | -3.89110497 | -35.89772439 |
| H | -0.07899571 | -4.44745281 | -35.89772439 |
| H | 2.29213870  | -3.81210926 | -35.89772439 |
| H | 3.81210926  | -2.29213870 | -35.89772439 |
| H | 4.44745281  | 0.07899571  | -35.89772439 |

Nanotube (6,6) u29v0s  
B3LYP/STO-3G Energy: -26216.963782

|   |           |           |           |
|---|-----------|-----------|-----------|
| 6 | 3.303303  | -2.707780 | 35.579254 |
| 6 | 3.996658  | -1.506855 | 35.579254 |
| 6 | 3.996658  | 1.506855  | 35.579254 |
| 6 | 3.303303  | 2.707780  | 35.579254 |
| 6 | 0.693354  | 4.214634  | 35.579254 |
| 6 | -0.693354 | 4.214634  | 35.579254 |
| 6 | -3.303303 | 2.707780  | 35.579254 |
| 6 | -3.996658 | 1.506855  | 35.579254 |
| 6 | -3.996658 | -1.506855 | 35.579254 |
| 6 | -3.303303 | -2.707780 | 35.579254 |
| 6 | -0.693354 | -4.214634 | 35.579254 |
| 6 | 0.693354  | -4.214634 | 35.579254 |
| 6 | 4.151171  | -0.737045 | 34.366638 |
| 6 | 4.151171  | 0.737045  | 34.366638 |
| 6 | 2.713885  | 3.226497  | 34.366638 |
| 6 | 1.437286  | 3.963542  | 34.366638 |
| 6 | -1.437286 | 3.963542  | 34.366638 |
| 6 | -2.713885 | 3.226497  | 34.366638 |
| 6 | -4.151171 | 0.737045  | 34.366638 |
| 6 | -4.151171 | -0.737045 | 34.366638 |
| 6 | -2.713885 | -3.226497 | 34.366638 |
| 6 | -1.437286 | -3.963542 | 34.366638 |
| 6 | 1.437286  | -3.963542 | 34.366638 |
| 6 | 2.713885  | -3.226497 | 34.366638 |
| 6 | 3.911616  | 1.420767  | 33.126574 |
| 6 | 3.186228  | 2.677175  | 33.126574 |
| 6 | 0.725387  | 4.097942  | 33.126574 |
| 6 | -0.725387 | 4.097942  | 33.126574 |
| 6 | -3.186228 | 2.677175  | 33.126574 |
| 6 | -3.911616 | 1.420767  | 33.126574 |
| 6 | -3.911616 | -1.420767 | 33.126574 |
| 6 | -3.186228 | -2.677175 | 33.126574 |
| 6 | -0.725387 | -4.097942 | 33.126574 |
| 6 | 0.725387  | -4.097942 | 33.126574 |
| 6 | 3.186228  | -2.677175 | 33.126574 |
| 6 | 3.911616  | -1.420767 | 33.126574 |
| 6 | 2.664943  | 3.183231  | 31.863805 |
| 6 | 1.424287  | 3.899524  | 31.863805 |
| 6 | -1.424287 | 3.899524  | 31.863805 |
| 6 | -2.664943 | 3.183231  | 31.863805 |
| 6 | -4.089230 | 0.716293  | 31.863805 |
| 6 | -4.089230 | -0.716293 | 31.863805 |
| 6 | -2.664943 | -3.183231 | 31.863805 |
| 6 | -1.424287 | -3.899524 | 31.863805 |
| 6 | 1.424287  | -3.899524 | 31.863805 |
| 6 | 2.664943  | -3.183231 | 31.863805 |
| 6 | 4.089230  | -0.716293 | 31.863805 |
| 6 | 4.089230  | 0.716293  | 31.863805 |
| 6 | 0.726073  | 4.106724  | 30.613374 |
| 6 | -0.726073 | 4.106724  | 30.613374 |
| 6 | -3.193491 | 2.682160  | 30.613374 |
| 6 | -3.919564 | 1.424565  | 30.613374 |
| 6 | -3.919564 | -1.424565 | 30.613374 |
| 6 | -3.193491 | -2.682160 | 30.613374 |
| 6 | -0.726073 | -4.106724 | 30.613374 |

|   |           |           |           |
|---|-----------|-----------|-----------|
| 6 | 0.726073  | -4.106724 | 30.613374 |
| 6 | 3.193491  | -2.682160 | 30.613374 |
| 6 | 3.919564  | -1.424565 | 30.613374 |
| 6 | 3.919564  | 1.424565  | 30.613374 |
| 6 | 3.193491  | 2.682160  | 30.613374 |
| 6 | -1.427050 | 3.920042  | 29.370358 |
| 6 | -2.681331 | 3.195883  | 29.370358 |
| 6 | -4.108381 | 0.724160  | 29.370358 |
| 6 | -4.108381 | -0.724160 | 29.370358 |
| 6 | -2.681331 | -3.195883 | 29.370358 |
| 6 | -1.427050 | -3.920042 | 29.370358 |
| 6 | 1.427050  | -3.920042 | 29.370358 |
| 6 | 2.681331  | -3.195883 | 29.370358 |
| 6 | 4.108381  | -0.724160 | 29.370358 |
| 6 | 4.108381  | 0.724160  | 29.370358 |
| 6 | 2.681331  | 3.195883  | 29.370358 |
| 6 | 1.427050  | 3.920042  | 29.370358 |
| 6 | -3.194928 | 2.676063  | 28.115601 |
| 6 | -3.915003 | 1.428857  | 28.115601 |
| 6 | -3.915003 | -1.428857 | 28.115601 |
| 6 | -3.194928 | -2.676063 | 28.115601 |
| 6 | -0.720075 | -4.104920 | 28.115601 |
| 6 | 0.720075  | -4.104920 | 28.115601 |
| 6 | 3.194928  | -2.676063 | 28.115601 |
| 6 | 3.915003  | -1.428857 | 28.115601 |
| 6 | 3.915003  | 1.428857  | 28.115601 |
| 6 | 3.194928  | 2.676063  | 28.115601 |
| 6 | 0.720075  | 4.104920  | 28.115601 |
| 6 | -0.720075 | 4.104920  | 28.115601 |
| 6 | -4.111284 | 0.725731  | 26.864885 |
| 6 | -4.111284 | -0.725731 | 26.864885 |
| 6 | -2.684144 | -3.197611 | 26.864885 |
| 6 | -1.427140 | -3.923342 | 26.864885 |
| 6 | 1.427140  | -3.923342 | 26.864885 |
| 6 | 2.684144  | -3.197611 | 26.864885 |
| 6 | 4.111284  | -0.725731 | 26.864885 |
| 6 | 4.111284  | 0.725731  | 26.864885 |
| 6 | 2.684144  | 3.197611  | 26.864885 |
| 6 | 1.427140  | 3.923342  | 26.864885 |
| 6 | -1.427140 | 3.923342  | 26.864885 |
| 6 | -2.684144 | 3.197611  | 26.864885 |
| 6 | -3.920923 | -1.427430 | 25.620243 |
| 6 | -3.196652 | -2.681904 | 25.620243 |
| 6 | -0.724271 | -4.109334 | 25.620243 |
| 6 | 0.724271  | -4.109334 | 25.620243 |
| 6 | 3.196652  | -2.681904 | 25.620243 |
| 6 | 3.920923  | -1.427430 | 25.620243 |
| 6 | 3.920923  | 1.427430  | 25.620243 |
| 6 | 3.196652  | 2.681904  | 25.620243 |
| 6 | 0.724271  | 4.109334  | 25.620243 |
| 6 | -0.724271 | 4.109334  | 25.620243 |
| 6 | -3.196652 | 2.681904  | 25.620243 |
| 6 | -3.920923 | 1.427430  | 25.620243 |
| 6 | -2.676723 | -3.194675 | 24.367009 |
| 6 | -1.428308 | -3.915447 | 24.367009 |
| 6 | 1.428308  | -3.915447 | 24.367009 |
| 6 | 2.676723  | -3.194675 | 24.367009 |
| 6 | 4.105031  | -0.720772 | 24.367009 |
| 6 | 4.105031  | 0.720772  | 24.367009 |
| 6 | 2.676723  | 3.194675  | 24.367009 |
| 6 | 1.428308  | 3.915447  | 24.367009 |
| 6 | -1.428308 | 3.915447  | 24.367009 |
| 6 | -2.676723 | 3.194675  | 24.367009 |
| 6 | -4.105031 | 0.720772  | 24.367009 |
| 6 | -4.105031 | -0.720772 | 24.367009 |
| 6 | -0.725141 | -4.110128 | 23.116061 |
| 6 | 0.725141  | -4.110128 | 23.116061 |
| 6 | 3.196905  | -2.683054 | 23.116061 |
| 6 | 3.922046  | -1.427074 | 23.116061 |
| 6 | 3.922046  | 1.427074  | 23.116061 |

|   |           |           |           |
|---|-----------|-----------|-----------|
| 6 | 3.196905  | 2.683054  | 23.116061 |
| 6 | 0.725141  | 4.110128  | 23.116061 |
| 6 | -0.725141 | 4.110128  | 23.116061 |
| 6 | -3.196905 | 2.683054  | 23.116061 |
| 6 | -3.922046 | 1.427074  | 23.116061 |
| 6 | -3.922046 | -1.427074 | 23.116061 |
| 6 | -3.196905 | -2.683054 | 23.116061 |
| 6 | 1.427377  | -3.920697 | 21.870689 |
| 6 | 2.681735  | -3.196493 | 21.870689 |
| 6 | 4.109111  | -0.724204 | 21.870689 |
| 6 | 4.109111  | 0.724204  | 21.870689 |
| 6 | 2.681735  | 3.196493  | 21.870689 |
| 6 | 1.427377  | 3.920697  | 21.870689 |
| 6 | -1.427377 | 3.920697  | 21.870689 |
| 6 | -2.681735 | 3.196493  | 21.870689 |
| 6 | -4.109111 | 0.724204  | 21.870689 |
| 6 | -4.109111 | -0.724204 | 21.870689 |
| 6 | -2.681735 | -3.196493 | 21.870689 |
| 6 | -1.427377 | -3.920697 | 21.870689 |
| 6 | 3.194861  | -2.677225 | 20.618191 |
| 6 | 3.915975  | -1.428218 | 20.618191 |
| 6 | 3.915975  | 1.428218  | 20.618191 |
| 6 | 3.194861  | 2.677225  | 20.618191 |
| 6 | 0.721114  | 4.105443  | 20.618191 |
| 6 | -0.721114 | 4.105443  | 20.618191 |
| 6 | -3.194861 | 2.677225  | 20.618191 |
| 6 | -3.915975 | 1.428218  | 20.618191 |
| 6 | -3.915975 | -1.428218 | 20.618191 |
| 6 | -3.194861 | -2.677225 | 20.618191 |
| 6 | -0.721114 | -4.105443 | 20.618191 |
| 6 | 0.721114  | -4.105443 | 20.618191 |
| 6 | 4.109889  | -0.724875 | 19.367214 |
| 6 | 4.109889  | 0.724875  | 19.367214 |
| 6 | 2.682705  | 3.196831  | 19.367214 |
| 6 | 1.427184  | 3.921706  | 19.367214 |
| 6 | -1.427184 | 3.921706  | 19.367214 |
| 6 | -2.682705 | 3.196831  | 19.367214 |
| 6 | -4.109889 | 0.724875  | 19.367214 |
| 6 | -4.109889 | -0.724875 | 19.367214 |
| 6 | -2.682705 | -3.196831 | 19.367214 |
| 6 | -1.427184 | -3.921706 | 19.367214 |
| 6 | 1.427184  | -3.921706 | 19.367214 |
| 6 | 2.682705  | -3.196831 | 19.367214 |
| 6 | 3.920728  | 1.427394  | 18.121456 |
| 6 | 3.196524  | 2.681753  | 18.121456 |
| 6 | 0.724204  | 4.109147  | 18.121456 |
| 6 | -0.724204 | 4.109147  | 18.121456 |
| 6 | -3.196524 | 2.681753  | 18.121456 |
| 6 | -3.920728 | 1.427394  | 18.121456 |
| 6 | -3.920728 | -1.427394 | 18.121456 |
| 6 | -3.196524 | -2.681753 | 18.121456 |
| 6 | -0.724204 | -4.109147 | 18.121456 |
| 6 | 0.724204  | -4.109147 | 18.121456 |
| 6 | 3.196524  | -2.681753 | 18.121456 |
| 6 | 3.920728  | -1.427394 | 18.121456 |
| 6 | 2.677523  | 3.194980  | 16.869377 |
| 6 | 1.428173  | 3.916293  | 16.869377 |
| 6 | -1.428173 | 3.916293  | 16.869377 |
| 6 | -2.677523 | 3.194980  | 16.869377 |
| 6 | -4.105695 | 0.721313  | 16.869377 |
| 6 | -4.105695 | -0.721313 | 16.869377 |
| 6 | -2.677523 | -3.194980 | 16.869377 |
| 6 | -1.428173 | -3.916293 | 16.869377 |
| 6 | 1.428173  | -3.916293 | 16.869377 |
| 6 | 2.677523  | -3.194980 | 16.869377 |
| 6 | 4.105695  | -0.721313 | 16.869377 |
| 6 | 4.105695  | 0.721313  | 16.869377 |
| 6 | 0.724705  | 4.109711  | 15.618382 |
| 6 | -0.724705 | 4.109711  | 15.618382 |
| 6 | -3.196761 | 2.682468  | 15.618382 |



|   |           |           |           |
|---|-----------|-----------|-----------|
| 6 | -3.921466 | 1.427243  | 15.618382 |
| 6 | -3.921466 | -1.427243 | 15.618382 |
| 6 | -3.196761 | -2.682468 | 15.618382 |
| 6 | -0.724705 | -4.109711 | 15.618382 |
| 6 | 0.724705  | -4.109711 | 15.618382 |
| 6 | 3.196761  | -2.682468 | 15.618382 |
| 6 | 3.921466  | -1.427243 | 15.618382 |
| 6 | 3.921466  | 1.427243  | 15.618382 |
| 6 | 3.196761  | 2.682468  | 15.618382 |
| 6 | -1.427392 | 3.920746  | 14.372382 |
| 6 | -2.681769 | 3.196531  | 14.372382 |
| 6 | -4.109162 | 0.724215  | 14.372382 |
| 6 | -4.109162 | -0.724215 | 14.372382 |
| 6 | -2.681769 | -3.196531 | 14.372382 |
| 6 | -1.427392 | -3.920746 | 14.372382 |
| 6 | 1.427392  | -3.920746 | 14.372382 |
| 6 | 2.681769  | -3.196531 | 14.372382 |
| 6 | 4.109162  | -0.724215 | 14.372382 |
| 6 | 4.109162  | 0.724215  | 14.372382 |
| 6 | 2.681769  | 3.196531  | 14.372382 |
| 6 | 1.427392  | 3.920746  | 14.372382 |
| 6 | -3.195052 | 2.677706  | 13.120585 |
| 6 | -3.916487 | 1.428143  | 13.120585 |
| 6 | -3.916487 | -1.428143 | 13.120585 |
| 6 | -3.195052 | -2.677706 | 13.120585 |
| 6 | -0.721435 | -4.105849 | 13.120585 |
| 6 | 0.721435  | -4.105849 | 13.120585 |
| 6 | 3.195052  | -2.677706 | 13.120585 |
| 6 | 3.916487  | -1.428143 | 13.120585 |
| 6 | 3.916487  | 1.428143  | 13.120585 |
| 6 | 3.195052  | 2.677706  | 13.120585 |
| 6 | 0.721435  | 4.105849  | 13.120585 |
| 6 | -0.721435 | 4.105849  | 13.120585 |
| 6 | -4.109584 | 0.724584  | 11.869562 |
| 6 | -4.109584 | -0.724584 | 11.869562 |
| 6 | -2.682300 | -3.196713 | 11.869562 |
| 6 | -1.427284 | -3.921296 | 11.869562 |
| 6 | 1.427284  | -3.921296 | 11.869562 |
| 6 | 2.682300  | -3.196713 | 11.869562 |
| 6 | 4.109584  | -0.724584 | 11.869562 |
| 6 | 4.109584  | 0.724584  | 11.869562 |
| 6 | 2.682300  | 3.196713  | 11.869562 |
| 6 | 1.427284  | 3.921296  | 11.869562 |
| 6 | -1.427284 | 3.921296  | 11.869562 |
| 6 | -2.682300 | 3.196713  | 11.869562 |
| 6 | -3.920780 | -1.427387 | 10.623410 |
| 6 | -3.196544 | -2.681802 | 10.623410 |
| 6 | -0.724236 | -4.109189 | 10.623410 |
| 6 | 0.724236  | -4.109189 | 10.623410 |
| 6 | 3.196544  | -2.681802 | 10.623410 |
| 6 | 3.920780  | -1.427387 | 10.623410 |
| 6 | 3.920780  | 1.427387  | 10.623410 |
| 6 | 3.196544  | 2.681802  | 10.623410 |
| 6 | 0.724236  | 4.109189  | 10.623410 |
| 6 | -0.724236 | 4.109189  | 10.623410 |
| 6 | -3.196544 | 2.681802  | 10.623410 |
| 6 | -3.920780 | 1.427387  | 10.623410 |
| 6 | -2.677822 | -3.195099 | 9.371820  |
| 6 | -1.428126 | -3.916612 | 9.371820  |
| 6 | 1.428126  | -3.916612 | 9.371820  |
| 6 | 2.677822  | -3.195099 | 9.371820  |
| 6 | 4.105948  | -0.721513 | 9.371820  |
| 6 | 4.105948  | 0.721513  | 9.371820  |
| 6 | 2.677822  | 3.195099  | 9.371820  |
| 6 | 1.428126  | 3.916612  | 9.371820  |
| 6 | -1.428126 | 3.916612  | 9.371820  |
| 6 | -2.677822 | 3.195099  | 9.371820  |
| 6 | -4.105948 | 0.721513  | 9.371820  |
| 6 | -4.105948 | -0.721513 | 9.371820  |
| 6 | -0.724491 | -4.109488 | 8.120756  |

|   |           |           |          |
|---|-----------|-----------|----------|
| 6 | 0.724491  | -4.109488 | 8.120756 |
| 6 | 3.196676  | -2.682172 | 8.120756 |
| 6 | 3.921167  | -1.427316 | 8.120756 |
| 6 | 3.921167  | 1.427316  | 8.120756 |
| 6 | 3.196676  | 2.682172  | 8.120756 |
| 6 | 0.724491  | 4.109488  | 8.120756 |
| 6 | -0.724491 | 4.109488  | 8.120756 |
| 6 | -3.196676 | 2.682172  | 8.120756 |
| 6 | -3.921167 | 1.427316  | 8.120756 |
| 6 | -3.921167 | -1.427316 | 8.120756 |
| 6 | -3.196676 | -2.682172 | 8.120756 |
| 6 | 1.427379  | -3.920827 | 6.874510 |
| 6 | 2.681846  | -3.196559 | 6.874510 |
| 6 | 4.109225  | -0.724267 | 6.874510 |
| 6 | 4.109225  | 0.724267  | 6.874510 |
| 6 | 2.681846  | 3.196559  | 6.874510 |
| 6 | 1.427379  | 3.920827  | 6.874510 |
| 6 | -1.427379 | 3.920827  | 6.874510 |
| 6 | -2.681846 | 3.196559  | 6.874510 |
| 6 | -4.109225 | 0.724267  | 6.874510 |
| 6 | -4.109225 | -0.724267 | 6.874510 |
| 6 | -2.681846 | -3.196559 | 6.874510 |
| 6 | -1.427379 | -3.920827 | 6.874510 |
| 6 | 3.195127  | -2.677892 | 5.623080 |
| 6 | 3.916686  | -1.428115 | 5.623080 |
| 6 | 3.916686  | 1.428115  | 5.623080 |
| 6 | 3.195127  | 2.677892  | 5.623080 |
| 6 | 0.721559  | 4.106007  | 5.623080 |
| 6 | -0.721559 | 4.106007  | 5.623080 |
| 6 | -3.195127 | 2.677892  | 5.623080 |
| 6 | -3.916686 | 1.428115  | 5.623080 |
| 6 | -3.916686 | -1.428115 | 5.623080 |
| 6 | -3.195127 | -2.677892 | 5.623080 |
| 6 | -0.721559 | -4.106007 | 5.623080 |
| 6 | 0.721559  | -4.106007 | 5.623080 |
| 6 | 4.109409  | -0.724417 | 4.371957 |
| 6 | 4.109409  | 0.724417  | 4.371957 |
| 6 | 2.682068  | 3.196644  | 4.371957 |
| 6 | 1.427341  | 3.921061  | 4.371957 |
| 6 | -1.427341 | 3.921061  | 4.371957 |
| 6 | -2.682068 | 3.196644  | 4.371957 |
| 6 | -4.109409 | 0.724417  | 4.371957 |
| 6 | -4.109409 | -0.724417 | 4.371957 |
| 6 | -2.682068 | -3.196644 | 4.371957 |
| 6 | -1.427341 | -3.921061 | 4.371957 |
| 6 | 1.427341  | -3.921061 | 4.371957 |
| 6 | 2.682068  | -3.196644 | 4.371957 |
| 6 | 3.920880  | 1.427365  | 3.125660 |
| 6 | 3.196574  | 2.681900  | 3.125660 |
| 6 | 0.724306  | 4.109264  | 3.125660 |
| 6 | -0.724306 | 4.109264  | 3.125660 |
| 6 | -3.196574 | 2.681900  | 3.125660 |
| 6 | -3.920880 | 1.427365  | 3.125660 |
| 6 | -3.920880 | -1.427365 | 3.125660 |
| 6 | -3.196574 | -2.681900 | 3.125660 |
| 6 | -0.724306 | -4.109264 | 3.125660 |
| 6 | 0.724306  | -4.109264 | 3.125660 |
| 6 | 3.196574  | -2.681900 | 3.125660 |
| 6 | 3.920880  | -1.427365 | 3.125660 |
| 6 | 2.677921  | 3.195137  | 1.874355 |
| 6 | 1.428109  | 3.916716  | 1.874355 |
| 6 | -1.428109 | 3.916716  | 1.874355 |
| 6 | -2.677921 | 3.195137  | 1.874355 |
| 6 | -4.106030 | 0.721580  | 1.874355 |
| 6 | -4.106030 | -0.721580 | 1.874355 |
| 6 | -2.677921 | -3.195137 | 1.874355 |
| 6 | -1.428109 | -3.916716 | 1.874355 |
| 6 | 1.428109  | -3.916716 | 1.874355 |
| 6 | 2.677921  | -3.195137 | 1.874355 |
| 6 | 4.106030  | -0.721580 | 1.874355 |

|   |           |           |           |
|---|-----------|-----------|-----------|
| 6 | 4.106030  | 0.721580  | 1.874355  |
| 6 | 0.724358  | 4.109350  | 0.623155  |
| 6 | -0.724358 | 4.109350  | 0.623155  |
| 6 | -3.196623 | 2.681987  | 0.623155  |
| 6 | -3.920980 | 1.427363  | 0.623155  |
| 6 | -3.920980 | -1.427363 | 0.623155  |
| 6 | -3.196623 | -2.681987 | 0.623155  |
| 6 | -0.724358 | -4.109350 | 0.623155  |
| 6 | 0.724358  | -4.109350 | 0.623155  |
| 6 | 3.196623  | -2.681987 | 0.623155  |
| 6 | 3.920980  | -1.427363 | 0.623155  |
| 6 | 3.920980  | 1.427363  | 0.623155  |
| 6 | 3.196623  | 2.681987  | 0.623155  |
| 6 | -1.427363 | 3.920980  | -0.623155 |
| 6 | -2.681987 | 3.196623  | -0.623155 |
| 6 | -4.109350 | 0.724358  | -0.623155 |
| 6 | -4.109350 | -0.724358 | -0.623155 |
| 6 | -2.681987 | -3.196623 | -0.623155 |
| 6 | -1.427363 | -3.920980 | -0.623155 |
| 6 | 1.427363  | -3.920980 | -0.623155 |
| 6 | 2.681987  | -3.196623 | -0.623155 |
| 6 | 4.109350  | -0.724358 | -0.623155 |
| 6 | 4.109350  | 0.724358  | -0.623155 |
| 6 | 2.681987  | 3.196623  | -0.623155 |
| 6 | 1.427363  | 3.920980  | -0.623155 |
| 6 | -3.195137 | 2.677921  | -1.874355 |
| 6 | -3.916716 | 1.428109  | -1.874355 |
| 6 | -3.916716 | -1.428109 | -1.874355 |
| 6 | -3.195137 | -2.677921 | -1.874355 |
| 6 | -0.721580 | -4.106030 | -1.874355 |
| 6 | 0.721580  | -4.106030 | -1.874355 |
| 6 | 3.195137  | -2.677921 | -1.874355 |
| 6 | 3.916716  | -1.428109 | -1.874355 |
| 6 | 3.916716  | 1.428109  | -1.874355 |
| 6 | 3.195137  | 2.677921  | -1.874355 |
| 6 | 0.721580  | 4.106030  | -1.874355 |
| 6 | -0.721580 | 4.106030  | -1.874355 |
| 6 | -4.109264 | 0.724306  | -3.125660 |
| 6 | -4.109264 | -0.724306 | -3.125660 |
| 6 | -2.681900 | -3.196574 | -3.125660 |
| 6 | -1.427365 | -3.920880 | -3.125660 |
| 6 | 1.427365  | -3.920880 | -3.125660 |
| 6 | 2.681900  | -3.196574 | -3.125660 |
| 6 | 4.109264  | -0.724306 | -3.125660 |
| 6 | 4.109264  | 0.724306  | -3.125660 |
| 6 | 2.681900  | 3.196574  | -3.125660 |
| 6 | 1.427365  | 3.920880  | -3.125660 |
| 6 | -1.427365 | 3.920880  | -3.125660 |
| 6 | -2.681900 | 3.196574  | -3.125660 |
| 6 | -3.921061 | -1.427341 | -4.371957 |
| 6 | -3.196644 | -2.682068 | -4.371957 |
| 6 | -0.724417 | -4.109409 | -4.371957 |
| 6 | 0.724417  | -4.109409 | -4.371957 |
| 6 | 3.196644  | -2.682068 | -4.371957 |
| 6 | 3.921061  | -1.427341 | -4.371957 |
| 6 | 3.921061  | 1.427341  | -4.371957 |
| 6 | 3.196644  | 2.682068  | -4.371957 |
| 6 | 0.724417  | 4.109409  | -4.371957 |
| 6 | -0.724417 | 4.109409  | -4.371957 |
| 6 | -3.196644 | 2.682068  | -4.371957 |
| 6 | -3.921061 | 1.427341  | -4.371957 |
| 6 | -2.677892 | -3.195127 | -5.623080 |
| 6 | -1.428115 | -3.916686 | -5.623080 |
| 6 | 1.428115  | -3.916686 | -5.623080 |
| 6 | 2.677892  | -3.195127 | -5.623080 |
| 6 | 4.106007  | -0.721559 | -5.623080 |
| 6 | 4.106007  | 0.721559  | -5.623080 |
| 6 | 2.677892  | 3.195127  | -5.623080 |
| 6 | 1.428115  | 3.916686  | -5.623080 |
| 6 | -1.428115 | 3.916686  | -5.623080 |

|   |           |           |            |
|---|-----------|-----------|------------|
| 6 | -2.677892 | 3.195127  | -5.623080  |
| 6 | -4.106007 | 0.721559  | -5.623080  |
| 6 | -4.106007 | -0.721559 | -5.623080  |
| 6 | -0.724267 | -4.109225 | -6.874510  |
| 6 | 0.724267  | -4.109225 | -6.874510  |
| 6 | 3.196559  | -2.681846 | -6.874510  |
| 6 | 3.920827  | -1.427379 | -6.874510  |
| 6 | 3.920827  | 1.427379  | -6.874510  |
| 6 | 3.196559  | 2.681846  | -6.874510  |
| 6 | 0.724267  | 4.109225  | -6.874510  |
| 6 | -0.724267 | 4.109225  | -6.874510  |
| 6 | -3.196559 | 2.681846  | -6.874510  |
| 6 | -3.920827 | 1.427379  | -6.874510  |
| 6 | -3.920827 | -1.427379 | -6.874510  |
| 6 | -3.196559 | -2.681846 | -6.874510  |
| 6 | 1.427316  | -3.921167 | -8.120756  |
| 6 | 2.682172  | -3.196676 | -8.120756  |
| 6 | 4.109488  | -0.724491 | -8.120756  |
| 6 | 4.109488  | 0.724491  | -8.120756  |
| 6 | 2.682172  | 3.196676  | -8.120756  |
| 6 | 1.427316  | 3.921167  | -8.120756  |
| 6 | -1.427316 | 3.921167  | -8.120756  |
| 6 | -2.682172 | 3.196676  | -8.120756  |
| 6 | -4.109488 | 0.724491  | -8.120756  |
| 6 | -4.109488 | -0.724491 | -8.120756  |
| 6 | -2.682172 | -3.196676 | -8.120756  |
| 6 | -1.427316 | -3.921167 | -8.120756  |
| 6 | 3.195099  | -2.677822 | -9.371820  |
| 6 | 3.916612  | -1.428126 | -9.371820  |
| 6 | 3.916612  | 1.428126  | -9.371820  |
| 6 | 3.195099  | 2.677822  | -9.371820  |
| 6 | 0.721513  | 4.105948  | -9.371820  |
| 6 | -0.721513 | 4.105948  | -9.371820  |
| 6 | -3.195099 | 2.677822  | -9.371820  |
| 6 | -3.916612 | 1.428126  | -9.371820  |
| 6 | -3.916612 | -1.428126 | -9.371820  |
| 6 | -3.195099 | -2.677822 | -9.371820  |
| 6 | -0.721513 | -4.105948 | -9.371820  |
| 6 | 0.721513  | -4.105948 | -9.371820  |
| 6 | 4.109189  | -0.724236 | -10.623410 |
| 6 | 4.109189  | 0.724236  | -10.623410 |
| 6 | 2.681802  | 3.196544  | -10.623410 |
| 6 | 1.427387  | 3.920780  | -10.623410 |
| 6 | -1.427387 | 3.920780  | -10.623410 |
| 6 | -2.681802 | 3.196544  | -10.623410 |
| 6 | -4.109189 | 0.724236  | -10.623410 |
| 6 | -4.109189 | -0.724236 | -10.623410 |
| 6 | -2.681802 | -3.196544 | -10.623410 |
| 6 | -1.427387 | -3.920780 | -10.623410 |
| 6 | 1.427387  | -3.920780 | -10.623410 |
| 6 | 2.681802  | -3.196544 | -10.623410 |
| 6 | 3.921296  | 1.427284  | -11.869562 |
| 6 | 3.196713  | 2.682300  | -11.869562 |
| 6 | 0.724584  | 4.109584  | -11.869562 |
| 6 | -0.724584 | 4.109584  | -11.869562 |
| 6 | -3.196713 | 2.682300  | -11.869562 |
| 6 | -3.921296 | 1.427284  | -11.869562 |
| 6 | -3.921296 | -1.427284 | -11.869562 |
| 6 | -3.196713 | -2.682300 | -11.869562 |
| 6 | -0.724584 | -4.109584 | -11.869562 |
| 6 | 0.724584  | -4.109584 | -11.869562 |
| 6 | 3.196713  | -2.682300 | -11.869562 |
| 6 | 3.921296  | -1.427284 | -11.869562 |
| 6 | 2.677706  | 3.195052  | -13.120585 |
| 6 | 1.428143  | 3.916487  | -13.120585 |
| 6 | -1.428143 | 3.916487  | -13.120585 |
| 6 | -2.677706 | 3.195052  | -13.120585 |
| 6 | -4.105849 | 0.721435  | -13.120585 |
| 6 | -4.105849 | -0.721435 | -13.120585 |
| 6 | -2.677706 | -3.195052 | -13.120585 |

|   |           |           |            |
|---|-----------|-----------|------------|
| 6 | -1.428143 | -3.916487 | -13.120585 |
| 6 | 1.428143  | -3.916487 | -13.120585 |
| 6 | 2.677706  | -3.195052 | -13.120585 |
| 6 | 4.105849  | -0.721435 | -13.120585 |
| 6 | 4.105849  | 0.721435  | -13.120585 |
| 6 | 0.724215  | 4.109162  | -14.372382 |
| 6 | -0.724215 | 4.109162  | -14.372382 |
| 6 | -3.196531 | 2.681769  | -14.372382 |
| 6 | -3.920746 | 1.427392  | -14.372382 |
| 6 | -3.920746 | -1.427392 | -14.372382 |
| 6 | -3.196531 | -2.681769 | -14.372382 |
| 6 | -0.724215 | -4.109162 | -14.372382 |
| 6 | 0.724215  | -4.109162 | -14.372382 |
| 6 | 3.196531  | -2.681769 | -14.372382 |
| 6 | 3.920746  | -1.427392 | -14.372382 |
| 6 | 3.920746  | 1.427392  | -14.372382 |
| 6 | 3.196531  | 2.681769  | -14.372382 |
| 6 | -1.427243 | 3.921466  | -15.618382 |
| 6 | -2.682468 | 3.196761  | -15.618382 |
| 6 | -4.109711 | 0.724705  | -15.618382 |
| 6 | -4.109711 | -0.724705 | -15.618382 |
| 6 | -2.682468 | -3.196761 | -15.618382 |
| 6 | -1.427243 | -3.921466 | -15.618382 |
| 6 | 1.427243  | -3.921466 | -15.618382 |
| 6 | 2.682468  | -3.196761 | -15.618382 |
| 6 | 4.109711  | -0.724705 | -15.618382 |
| 6 | 4.109711  | 0.724705  | -15.618382 |
| 6 | 2.682468  | 3.196761  | -15.618382 |
| 6 | 1.427243  | 3.921466  | -15.618382 |
| 6 | -3.194980 | 2.677523  | -16.869377 |
| 6 | -3.916293 | 1.428173  | -16.869377 |
| 6 | -3.916293 | -1.428173 | -16.869377 |
| 6 | -3.194980 | -2.677523 | -16.869377 |
| 6 | -0.721313 | -4.105695 | -16.869377 |
| 6 | 0.721313  | -4.105695 | -16.869377 |
| 6 | 3.194980  | -2.677523 | -16.869377 |
| 6 | 3.916293  | -1.428173 | -16.869377 |
| 6 | 3.916293  | 1.428173  | -16.869377 |
| 6 | 3.194980  | 2.677523  | -16.869377 |
| 6 | 0.721313  | 4.105695  | -16.869377 |
| 6 | -0.721313 | 4.105695  | -16.869377 |
| 6 | -4.109147 | 0.724204  | -18.121456 |
| 6 | -4.109147 | -0.724204 | -18.121456 |
| 6 | -2.681753 | -3.196524 | -18.121456 |
| 6 | -1.427394 | -3.920728 | -18.121456 |
| 6 | 1.427394  | -3.920728 | -18.121456 |
| 6 | 2.681753  | -3.196524 | -18.121456 |
| 6 | 4.109147  | -0.724204 | -18.121456 |
| 6 | 4.109147  | 0.724204  | -18.121456 |
| 6 | 2.681753  | 3.196524  | -18.121456 |
| 6 | 1.427394  | 3.920728  | -18.121456 |
| 6 | -1.427394 | 3.920728  | -18.121456 |
| 6 | -2.681753 | 3.196524  | -18.121456 |
| 6 | -3.921706 | -1.427184 | -19.367214 |
| 6 | -3.196831 | -2.682705 | -19.367214 |
| 6 | -0.724875 | -4.109889 | -19.367214 |
| 6 | 0.724875  | -4.109889 | -19.367214 |
| 6 | 3.196831  | -2.682705 | -19.367214 |
| 6 | 3.921706  | -1.427184 | -19.367214 |
| 6 | 3.921706  | 1.427184  | -19.367214 |
| 6 | 3.196831  | 2.682705  | -19.367214 |
| 6 | 0.724875  | 4.109889  | -19.367214 |
| 6 | -0.724875 | 4.109889  | -19.367214 |
| 6 | -3.196831 | 2.682705  | -19.367214 |
| 6 | -3.921706 | 1.427184  | -19.367214 |
| 6 | -2.677225 | -3.194861 | -20.618191 |
| 6 | -1.428218 | -3.915975 | -20.618191 |
| 6 | 1.428218  | -3.915975 | -20.618191 |
| 6 | 2.677225  | -3.194861 | -20.618191 |
| 6 | 4.105443  | -0.721114 | -20.618191 |

|   |           |           |            |
|---|-----------|-----------|------------|
| 6 | 4.105443  | 0.721114  | -20.618191 |
| 6 | 2.677225  | 3.194861  | -20.618191 |
| 6 | 1.428218  | 3.915975  | -20.618191 |
| 6 | -1.428218 | 3.915975  | -20.618191 |
| 6 | -2.677225 | 3.194861  | -20.618191 |
| 6 | -4.105443 | 0.721114  | -20.618191 |
| 6 | -4.105443 | -0.721114 | -20.618191 |
| 6 | -0.724204 | -4.109111 | -21.870689 |
| 6 | 0.724204  | -4.109111 | -21.870689 |
| 6 | 3.196493  | -2.681735 | -21.870689 |
| 6 | 3.920697  | -1.427377 | -21.870689 |
| 6 | 3.920697  | 1.427377  | -21.870689 |
| 6 | 3.196493  | 2.681735  | -21.870689 |
| 6 | 0.724204  | 4.109111  | -21.870689 |
| 6 | -0.724204 | 4.109111  | -21.870689 |
| 6 | -3.196493 | 2.681735  | -21.870689 |
| 6 | -3.920697 | 1.427377  | -21.870689 |
| 6 | -3.920697 | -1.427377 | -21.870689 |
| 6 | -3.196493 | -2.681735 | -21.870689 |
| 6 | 1.427074  | -3.922046 | -23.116061 |
| 6 | 2.683054  | -3.196905 | -23.116061 |
| 6 | 4.110128  | -0.725141 | -23.116061 |
| 6 | 4.110128  | 0.725141  | -23.116061 |
| 6 | 2.683054  | 3.196905  | -23.116061 |
| 6 | 1.427074  | 3.922046  | -23.116061 |
| 6 | -1.427074 | 3.922046  | -23.116061 |
| 6 | -2.683054 | 3.196905  | -23.116061 |
| 6 | -4.110128 | 0.725141  | -23.116061 |
| 6 | -4.110128 | -0.725141 | -23.116061 |
| 6 | -2.683054 | -3.196905 | -23.116061 |
| 6 | -1.427074 | -3.922046 | -23.116061 |
| 6 | 3.194675  | -2.676723 | -24.367009 |
| 6 | 3.915447  | -1.428308 | -24.367009 |
| 6 | 3.915447  | 1.428308  | -24.367009 |
| 6 | 3.194675  | 2.676723  | -24.367009 |
| 6 | 0.720772  | 4.105031  | -24.367009 |
| 6 | -0.720772 | 4.105031  | -24.367009 |
| 6 | -3.194675 | 2.676723  | -24.367009 |
| 6 | -3.915447 | 1.428308  | -24.367009 |
| 6 | -3.915447 | -1.428308 | -24.367009 |
| 6 | -3.194675 | -2.676723 | -24.367009 |
| 6 | -0.720772 | -4.105031 | -24.367009 |
| 6 | 0.720772  | -4.105031 | -24.367009 |
| 6 | 4.109334  | -0.724271 | -25.620243 |
| 6 | 4.109334  | 0.724271  | -25.620243 |
| 6 | 2.681904  | 3.196652  | -25.620243 |
| 6 | 1.427430  | 3.920923  | -25.620243 |
| 6 | -1.427430 | 3.920923  | -25.620243 |
| 6 | -2.681904 | 3.196652  | -25.620243 |
| 6 | -4.109334 | 0.724271  | -25.620243 |
| 6 | -4.109334 | -0.724271 | -25.620243 |
| 6 | -2.681904 | -3.196652 | -25.620243 |
| 6 | -1.427430 | -3.920923 | -25.620243 |
| 6 | 1.427430  | -3.920923 | -25.620243 |
| 6 | 2.681904  | -3.196652 | -25.620243 |
| 6 | 3.923342  | 1.427140  | -26.864885 |
| 6 | 3.197611  | 2.684144  | -26.864885 |
| 6 | 0.725731  | 4.111284  | -26.864885 |
| 6 | -0.725731 | 4.111284  | -26.864885 |
| 6 | -3.197611 | 2.684144  | -26.864885 |
| 6 | -3.923342 | 1.427140  | -26.864885 |
| 6 | -3.923342 | -1.427140 | -26.864885 |
| 6 | -3.197611 | -2.684144 | -26.864885 |
| 6 | -0.725731 | -4.111284 | -26.864885 |
| 6 | 0.725731  | -4.111284 | -26.864885 |
| 6 | 3.197611  | -2.684144 | -26.864885 |
| 6 | 3.923342  | -1.427140 | -26.864885 |
| 6 | 2.676063  | 3.194928  | -28.115601 |
| 6 | 1.428857  | 3.915003  | -28.115601 |
| 6 | -1.428857 | 3.915003  | -28.115601 |

|   |           |           |            |
|---|-----------|-----------|------------|
| 6 | -2.676063 | 3.194928  | -28.115601 |
| 6 | -4.104920 | 0.720075  | -28.115601 |
| 6 | -4.104920 | -0.720075 | -28.115601 |
| 6 | -2.676063 | -3.194928 | -28.115601 |
| 6 | -1.428857 | -3.915003 | -28.115601 |
| 6 | 1.428857  | -3.915003 | -28.115601 |
| 6 | 2.676063  | -3.194928 | -28.115601 |
| 6 | 4.104920  | -0.720075 | -28.115601 |
| 6 | 4.104920  | 0.720075  | -28.115601 |
| 6 | 0.724160  | 4.108381  | -29.370358 |
| 6 | -0.724160 | 4.108381  | -29.370358 |
| 6 | -3.195883 | 2.681331  | -29.370358 |
| 6 | -3.920042 | 1.427050  | -29.370358 |
| 6 | -3.920042 | -1.427050 | -29.370358 |
| 6 | -3.195883 | -2.681331 | -29.370358 |
| 6 | -0.724160 | -4.108381 | -29.370358 |
| 6 | 0.724160  | -4.108381 | -29.370358 |
| 6 | 3.195883  | -2.681331 | -29.370358 |
| 6 | 3.920042  | -1.427050 | -29.370358 |
| 6 | 3.920042  | 1.427050  | -29.370358 |
| 6 | 3.195883  | 2.681331  | -29.370358 |
| 6 | -1.424565 | 3.919564  | -30.613374 |
| 6 | -2.682160 | 3.193491  | -30.613374 |
| 6 | -4.106724 | 0.726073  | -30.613374 |
| 6 | -4.106724 | -0.726073 | -30.613374 |
| 6 | -2.682160 | -3.193491 | -30.613374 |
| 6 | -1.424565 | -3.919564 | -30.613374 |
| 6 | 1.424565  | -3.919564 | -30.613374 |
| 6 | 2.682160  | -3.193491 | -30.613374 |
| 6 | 4.106724  | -0.726073 | -30.613374 |
| 6 | 4.106724  | 0.726073  | -30.613374 |
| 6 | 2.682160  | 3.193491  | -30.613374 |
| 6 | 1.424565  | 3.919564  | -30.613374 |
| 6 | -3.183231 | 2.664943  | -31.863805 |
| 6 | -3.899524 | 1.424287  | -31.863805 |
| 6 | -3.899524 | -1.424287 | -31.863805 |
| 6 | -3.183231 | -2.664943 | -31.863805 |
| 6 | -0.716293 | -4.089230 | -31.863805 |
| 6 | 0.716293  | -4.089230 | -31.863805 |
| 6 | 3.183231  | -2.664943 | -31.863805 |
| 6 | 3.899524  | -1.424287 | -31.863805 |
| 6 | 3.899524  | 1.424287  | -31.863805 |
| 6 | 3.183231  | 2.664943  | -31.863805 |
| 6 | 0.716293  | 4.089230  | -31.863805 |
| 6 | -0.716293 | 4.089230  | -31.863805 |
| 6 | -4.097942 | 0.725387  | -33.126574 |
| 6 | -4.097942 | -0.725387 | -33.126574 |
| 6 | -2.677175 | -3.186228 | -33.126574 |
| 6 | -1.420767 | -3.911616 | -33.126574 |
| 6 | 1.420767  | -3.911616 | -33.126574 |
| 6 | 2.677175  | -3.186228 | -33.126574 |
| 6 | 4.097942  | -0.725387 | -33.126574 |
| 6 | 4.097942  | 0.725387  | -33.126574 |
| 6 | 2.677175  | 3.186228  | -33.126574 |
| 6 | 1.420767  | 3.911616  | -33.126574 |
| 6 | -1.420767 | 3.911616  | -33.126574 |
| 6 | -2.677175 | 3.186228  | -33.126574 |
| 6 | -3.963542 | -1.437286 | -34.366638 |
| 6 | -3.226497 | -2.713885 | -34.366638 |
| 6 | -0.737045 | -4.151171 | -34.366638 |
| 6 | 0.737045  | -4.151171 | -34.366638 |
| 6 | 3.226497  | -2.713885 | -34.366638 |
| 6 | 3.963542  | -1.437286 | -34.366638 |
| 6 | 3.963542  | 1.437286  | -34.366638 |
| 6 | 3.226497  | 2.713885  | -34.366638 |
| 6 | 0.737045  | 4.151171  | -34.366638 |
| 6 | -0.737045 | 4.151171  | -34.366638 |
| 6 | -3.226497 | 2.713885  | -34.366638 |
| 6 | -3.963542 | 1.437286  | -34.366638 |
| 6 | -2.707780 | -3.303303 | -35.579254 |

|   |           |           |            |
|---|-----------|-----------|------------|
| 6 | -1.506855 | -3.996658 | -35.579254 |
| 6 | 1.506855  | -3.996658 | -35.579254 |
| 6 | 2.707780  | -3.303303 | -35.579254 |
| 6 | 4.214634  | -0.693354 | -35.579254 |
| 6 | 4.214634  | 0.693354  | -35.579254 |
| 6 | 2.707780  | 3.303303  | -35.579254 |
| 6 | 1.506855  | 3.996658  | -35.579254 |
| 6 | -1.506855 | 3.996658  | -35.579254 |
| 6 | -2.707780 | 3.303303  | -35.579254 |
| 6 | -4.214634 | 0.693354  | -35.579254 |
| 6 | -4.214634 | -0.693354 | -35.579254 |
| 1 | 3.087128  | -3.198424 | 36.536979  |
| 1 | 4.313481  | -1.074319 | 36.536979  |
| 1 | 4.313481  | 1.074319  | 36.536979  |
| 1 | 3.087128  | 3.198424  | 36.536979  |
| 1 | 1.226353  | 4.272743  | 36.536979  |
| 1 | -1.226353 | 4.272743  | 36.536979  |
| 1 | -3.087128 | 3.198424  | 36.536979  |
| 1 | -4.313481 | 1.074319  | 36.536979  |
| 1 | -4.313481 | -1.074319 | 36.536979  |
| 1 | -3.087128 | -3.198424 | 36.536979  |
| 1 | -1.226353 | -4.272743 | 36.536979  |
| 1 | 1.226353  | -4.272743 | 36.536979  |
| 1 | -3.198424 | -3.087128 | -36.536979 |
| 1 | -1.074319 | -4.313481 | -36.536979 |
| 1 | 1.074319  | -4.313481 | -36.536979 |
| 1 | 3.198424  | -3.087128 | -36.536979 |
| 1 | 4.272743  | -1.226353 | -36.536979 |
| 1 | 4.272743  | 1.226353  | -36.536979 |
| 1 | 3.198424  | 3.087128  | -36.536979 |
| 1 | 1.074319  | 4.313481  | -36.536979 |
| 1 | -1.074319 | 4.313481  | -36.536979 |
| 1 | -3.198424 | 3.087128  | -36.536979 |
| 1 | -4.272743 | 1.226353  | -36.536979 |
| 1 | -4.272743 | -1.226353 | -36.536979 |

Nanotube (6,6) u29v6s  
B3LYP/STO-3G Energy: -26668.745782

|   |           |           |           |
|---|-----------|-----------|-----------|
| 6 | 1.506967  | -3.995665 | 36.214094 |
| 6 | 2.706864  | -3.302904 | 36.214094 |
| 6 | 4.213831  | -0.692761 | 36.214094 |
| 6 | 4.213831  | 0.692761  | 36.214094 |
| 6 | 2.706864  | 3.302904  | 36.214094 |
| 6 | 1.506967  | 3.995665  | 36.214094 |
| 6 | -1.506967 | 3.995665  | 36.214094 |
| 6 | -2.706864 | 3.302904  | 36.214094 |
| 6 | -4.213831 | 0.692761  | 36.214094 |
| 6 | -4.213831 | -0.692761 | 36.214094 |
| 6 | -2.706864 | -3.302904 | 36.214094 |
| 6 | -1.506967 | -3.995665 | 36.214094 |
| 6 | 3.225659  | -2.712357 | 35.000194 |
| 6 | 3.961800  | -1.437325 | 35.000194 |
| 6 | 3.961800  | 1.437325  | 35.000194 |
| 6 | 3.225659  | 2.712357  | 35.000194 |
| 6 | 0.736140  | 4.149681  | 35.000194 |
| 6 | -0.736140 | 4.149681  | 35.000194 |
| 6 | -3.225659 | 2.712357  | 35.000194 |
| 6 | -3.961800 | 1.437325  | 35.000194 |
| 6 | -3.961800 | -1.437325 | 35.000194 |
| 6 | -3.225659 | -2.712357 | 35.000194 |
| 6 | -0.736140 | -4.149681 | 35.000194 |
| 6 | 0.736140  | -4.149681 | 35.000194 |
| 6 | 4.098028  | -0.725693 | 33.760161 |
| 6 | 4.098028  | 0.725693  | 33.760161 |
| 6 | 2.677483  | 3.186149  | 33.760161 |
| 6 | 1.420545  | 3.911843  | 33.760161 |
| 6 | -1.420545 | 3.911843  | 33.760161 |



|   |           |           |           |
|---|-----------|-----------|-----------|
| 6 | -2.677483 | 3.186149  | 33.760161 |
| 6 | -4.098028 | 0.725693  | 33.760161 |
| 6 | -4.098028 | -0.725693 | 33.760161 |
| 6 | -2.677483 | -3.186149 | 33.760161 |
| 6 | -1.420545 | -3.911843 | 33.760161 |
| 6 | 1.420545  | -3.911843 | 33.760161 |
| 6 | 2.677483  | -3.186149 | 33.760161 |
| 6 | 3.898441  | 1.424277  | 32.497993 |
| 6 | 3.182680  | 2.664010  | 32.497993 |
| 6 | 0.715761  | 4.088287  | 32.497993 |
| 6 | -0.715761 | 4.088287  | 32.497993 |
| 6 | -3.182680 | 2.664010  | 32.497993 |
| 6 | -3.898441 | 1.424277  | 32.497993 |
| 6 | -3.898441 | -1.424277 | 32.497993 |
| 6 | -3.182680 | -2.664010 | 32.497993 |
| 6 | -0.715761 | -4.088287 | 32.497993 |
| 6 | 0.715761  | -4.088287 | 32.497993 |
| 6 | 3.182680  | -2.664010 | 32.497993 |
| 6 | 3.898441  | -1.424277 | 32.497993 |
| 6 | 2.680626  | 3.192629  | 31.246090 |
| 6 | 1.424584  | 3.917805  | 31.246090 |
| 6 | -1.424584 | 3.917805  | 31.246090 |
| 6 | -2.680626 | 3.192629  | 31.246090 |
| 6 | -4.105211 | 0.725176  | 31.246090 |
| 6 | -4.105211 | -0.725176 | 31.246090 |
| 6 | -2.680626 | -3.192629 | 31.246090 |
| 6 | -1.424584 | -3.917805 | 31.246090 |
| 6 | 1.424584  | -3.917805 | 31.246090 |
| 6 | 2.680626  | -3.192629 | 31.246090 |
| 6 | 4.105211  | -0.725176 | 31.246090 |
| 6 | 4.105211  | 0.725176  | 31.246090 |
| 6 | 0.724508  | 4.108382  | 30.003013 |
| 6 | -0.724508 | 4.108382  | 30.003013 |
| 6 | -3.195709 | 2.681633  | 30.003013 |
| 6 | -3.920217 | 1.426749  | 30.003013 |
| 6 | -3.920217 | -1.426749 | 30.003013 |
| 6 | -3.195709 | -2.681633 | 30.003013 |
| 6 | -0.724508 | -4.108382 | 30.003013 |
| 6 | 0.724508  | -4.108382 | 30.003013 |
| 6 | 3.195709  | -2.681633 | 30.003013 |
| 6 | 3.920217  | -1.426749 | 30.003013 |
| 6 | 3.920217  | 1.426749  | 30.003013 |
| 6 | 3.195709  | 2.681633  | 30.003013 |
| 6 | -1.428784 | 3.913858  | 28.749042 |
| 6 | -2.675108 | 3.194292  | 28.749042 |
| 6 | -4.103893 | 0.719565  | 28.749042 |
| 6 | -4.103893 | -0.719565 | 28.749042 |
| 6 | -2.675108 | -3.194292 | 28.749042 |
| 6 | -1.428784 | -3.913858 | 28.749042 |
| 6 | 1.428784  | -3.913858 | 28.749042 |
| 6 | 2.675108  | -3.194292 | 28.749042 |
| 6 | 4.103893  | -0.719565 | 28.749042 |
| 6 | 4.103893  | 0.719565  | 28.749042 |
| 6 | 2.675108  | 3.194292  | 28.749042 |
| 6 | 1.428784  | 3.913858  | 28.749042 |
| 6 | -3.196697 | 2.682414  | 27.496710 |
| 6 | -3.921387 | 1.427214  | 27.496710 |
| 6 | -3.921387 | -1.427214 | 27.496710 |
| 6 | -3.196697 | -2.682414 | 27.496710 |
| 6 | -0.724690 | -4.109628 | 27.496710 |
| 6 | 0.724690  | -4.109628 | 27.496710 |
| 6 | 3.196697  | -2.682414 | 27.496710 |
| 6 | 3.921387  | -1.427214 | 27.496710 |
| 6 | 3.921387  | 1.427214  | 27.496710 |
| 6 | 3.196697  | 2.682414  | 27.496710 |
| 6 | 0.724690  | 4.109628  | 27.496710 |
| 6 | -0.724690 | 4.109628  | 27.496710 |
| 6 | -4.109462 | 0.724710  | 26.251894 |
| 6 | -4.109462 | -0.724710 | 26.251894 |
| 6 | -2.682348 | -3.196543 | 26.251894 |

|   |           |           |           |
|---|-----------|-----------|-----------|
| 6 | -1.427114 | -3.921253 | 26.251894 |
| 6 | 1.427114  | -3.921253 | 26.251894 |
| 6 | 2.682348  | -3.196543 | 26.251894 |
| 6 | 4.109462  | -0.724710 | 26.251894 |
| 6 | 4.109462  | 0.724710  | 26.251894 |
| 6 | 2.682348  | 3.196543  | 26.251894 |
| 6 | 1.427114  | 3.921253  | 26.251894 |
| 6 | -1.427114 | 3.921253  | 26.251894 |
| 6 | -2.682348 | 3.196543  | 26.251894 |
| 6 | -3.914438 | -1.428235 | 24.999671 |
| 6 | -3.194106 | -2.675885 | 24.999671 |
| 6 | -0.720331 | -4.104120 | 24.999671 |
| 6 | 0.720331  | -4.104120 | 24.999671 |
| 6 | 3.194106  | -2.675885 | 24.999671 |
| 6 | 3.914438  | -1.428235 | 24.999671 |
| 6 | 3.914438  | 1.428235  | 24.999671 |
| 6 | 3.194106  | 2.675885  | 24.999671 |
| 6 | 0.720331  | 4.104120  | 24.999671 |
| 6 | -0.720331 | 4.104120  | 24.999671 |
| 6 | -3.194106 | 2.675885  | 24.999671 |
| 6 | -3.914438 | 1.428235  | 24.999671 |
| 6 | -2.681122 | -3.195915 | 23.746965 |
| 6 | -1.427182 | -3.919877 | 23.746965 |
| 6 | 1.427182  | -3.919877 | 23.746965 |
| 6 | 2.681122  | -3.195915 | 23.746965 |
| 6 | 4.108304  | -0.723962 | 23.746965 |
| 6 | 4.108304  | 0.723962  | 23.746965 |
| 6 | 2.681122  | 3.195915  | 23.746965 |
| 6 | 1.427182  | 3.919877  | 23.746965 |
| 6 | -1.427182 | 3.919877  | 23.746965 |
| 6 | -2.681122 | 3.195915  | 23.746965 |
| 6 | -4.108304 | 0.723962  | 23.746965 |
| 6 | -4.108304 | -0.723962 | 23.746965 |
| 6 | -0.724709 | -4.109307 | 22.501261 |
| 6 | 0.724709  | -4.109307 | 22.501261 |
| 6 | 3.196410  | -2.682270 | 22.501261 |
| 6 | 3.921118  | -1.427037 | 22.501261 |
| 6 | 3.921118  | 1.427037  | 22.501261 |
| 6 | 3.196410  | 2.682270  | 22.501261 |
| 6 | 0.724709  | 4.109307  | 22.501261 |
| 6 | -0.724709 | 4.109307  | 22.501261 |
| 6 | -3.196410 | 2.682270  | 22.501261 |
| 6 | -3.921118 | 1.427037  | 22.501261 |
| 6 | -3.921118 | -1.427037 | 22.501261 |
| 6 | -3.196410 | -2.682270 | 22.501261 |
| 6 | 1.428117  | -3.915083 | 21.250020 |
| 6 | 2.676503  | -3.194327 | 21.250020 |
| 6 | 4.104620  | -0.720756 | 21.250020 |
| 6 | 4.104620  | 0.720756  | 21.250020 |
| 6 | 2.676503  | 3.194327  | 21.250020 |
| 6 | 1.428117  | 3.915083  | 21.250020 |
| 6 | -1.428117 | 3.915083  | 21.250020 |
| 6 | -2.676503 | 3.194327  | 21.250020 |
| 6 | -4.104620 | 0.720756  | 21.250020 |
| 6 | -4.104620 | -0.720756 | 21.250020 |
| 6 | -2.676503 | -3.194327 | 21.250020 |
| 6 | -1.428117 | -3.915083 | 21.250020 |
| 6 | 3.195751  | -2.680541 | 19.997175 |
| 6 | 3.919293  | -1.427331 | 19.997175 |
| 6 | 3.919293  | 1.427331  | 19.997175 |
| 6 | 3.195751  | 2.680541  | 19.997175 |
| 6 | 0.723541  | 4.107872  | 19.997175 |
| 6 | -0.723541 | 4.107872  | 19.997175 |
| 6 | -3.195751 | 2.680541  | 19.997175 |
| 6 | -3.919293 | 1.427331  | 19.997175 |
| 6 | -3.919293 | -1.427331 | 19.997175 |
| 6 | -3.195751 | -2.680541 | 19.997175 |
| 6 | -0.723541 | -4.107872 | 19.997175 |
| 6 | 0.723541  | -4.107872 | 19.997175 |
| 6 | 4.109398  | -0.724761 | 18.750899 |

|   |           |           |           |
|---|-----------|-----------|-----------|
| 6 | 4.109398  | 0.724761  | 18.750899 |
| 6 | 2.682360  | 3.196462  | 18.750899 |
| 6 | 1.427037  | 3.921223  | 18.750899 |
| 6 | -1.427037 | 3.921223  | 18.750899 |
| 6 | -2.682360 | 3.196462  | 18.750899 |
| 6 | -4.109398 | 0.724761  | 18.750899 |
| 6 | -4.109398 | -0.724761 | 18.750899 |
| 6 | -2.682360 | -3.196462 | 18.750899 |
| 6 | -1.427037 | -3.921223 | 18.750899 |
| 6 | 1.427037  | -3.921223 | 18.750899 |
| 6 | 2.682360  | -3.196462 | 18.750899 |
| 6 | 3.915562  | 1.428038  | 17.500331 |
| 6 | 3.194498  | 2.676957  | 17.500331 |
| 6 | 0.721063  | 4.104995  | 17.500331 |
| 6 | -0.721063 | 4.104995  | 17.500331 |
| 6 | -3.194498 | 2.676957  | 17.500331 |
| 6 | -3.915562 | 1.428038  | 17.500331 |
| 6 | -3.915562 | -1.428038 | 17.500331 |
| 6 | -3.194498 | -2.676957 | 17.500331 |
| 6 | -0.721063 | -4.104995 | 17.500331 |
| 6 | 0.721063  | -4.104995 | 17.500331 |
| 6 | 3.194498  | -2.676957 | 17.500331 |
| 6 | 3.915562  | -1.428038 | 17.500331 |
| 6 | 2.680077  | 3.195595  | 16.247375 |
| 6 | 1.427428  | 3.918812  | 16.247375 |
| 6 | -1.427428 | 3.918812  | 16.247375 |
| 6 | -2.680077 | 3.195595  | 16.247375 |
| 6 | -4.107505 | 0.723217  | 16.247375 |
| 6 | -4.107505 | -0.723217 | 16.247375 |
| 6 | -2.680077 | -3.195595 | 16.247375 |
| 6 | -1.427428 | -3.918812 | 16.247375 |
| 6 | 1.427428  | -3.918812 | 16.247375 |
| 6 | 2.680077  | -3.195595 | 16.247375 |
| 6 | 4.107505  | -0.723217 | 16.247375 |
| 6 | 4.107505  | 0.723217  | 16.247375 |
| 6 | 0.724811  | 4.109455  | 15.000640 |
| 6 | -0.724811 | 4.109455  | 15.000640 |
| 6 | -3.196487 | 2.682432  | 15.000640 |
| 6 | -3.921298 | 1.427023  | 15.000640 |
| 6 | -3.921298 | -1.427023 | 15.000640 |
| 6 | -3.196487 | -2.682432 | 15.000640 |
| 6 | -0.724811 | -4.109455 | 15.000640 |
| 6 | 0.724811  | -4.109455 | 15.000640 |
| 6 | 3.196487  | -2.682432 | 15.000640 |
| 6 | 3.921298  | -1.427023 | 15.000640 |
| 6 | 3.921298  | 1.427023  | 15.000640 |
| 6 | 3.196487  | 2.682432  | 15.000640 |
| 6 | -1.427971 | 3.915938  | 13.750623 |
| 6 | -2.677316 | 3.194628  | 13.750623 |
| 6 | -4.105288 | 0.721310  | 13.750623 |
| 6 | -4.105288 | -0.721310 | 13.750623 |
| 6 | -2.677316 | -3.194628 | 13.750623 |
| 6 | -1.427971 | -3.915938 | 13.750623 |
| 6 | 1.427971  | -3.915938 | 13.750623 |
| 6 | 2.677316  | -3.194628 | 13.750623 |
| 6 | 4.105288  | -0.721310 | 13.750623 |
| 6 | 4.105288  | 0.721310  | 13.750623 |
| 6 | 2.677316  | 3.194628  | 13.750623 |
| 6 | 1.427971  | 3.915938  | 13.750623 |
| 6 | -3.195454 | 2.679660  | 12.497586 |
| 6 | -3.918381 | 1.427514  | 12.497586 |
| 6 | -3.918381 | -1.427514 | 12.497586 |
| 6 | -3.195454 | -2.679660 | 12.497586 |
| 6 | -0.722927 | -4.107175 | 12.497586 |
| 6 | 0.722927  | -4.107175 | 12.497586 |
| 6 | 3.195454  | -2.679660 | 12.497586 |
| 6 | 3.918381  | -1.427514 | 12.497586 |
| 6 | 3.918381  | 1.427514  | 12.497586 |
| 6 | 3.195454  | 2.679660  | 12.497586 |
| 6 | 0.722927  | 4.107175  | 12.497586 |

|   |           |           |           |
|---|-----------|-----------|-----------|
| 6 | -0.722927 | 4.107175  | 12.497586 |
| 6 | -4.109503 | 0.724851  | 11.250445 |
| 6 | -4.109503 | -0.724851 | 11.250445 |
| 6 | -2.682491 | -3.196508 | 11.250445 |
| 6 | -1.427012 | -3.921359 | 11.250445 |
| 6 | 1.427012  | -3.921359 | 11.250445 |
| 6 | 2.682491  | -3.196508 | 11.250445 |
| 6 | 4.109503  | -0.724851 | 11.250445 |
| 6 | 4.109503  | 0.724851  | 11.250445 |
| 6 | 2.682491  | 3.196508  | 11.250445 |
| 6 | 1.427012  | 3.921359  | 11.250445 |
| 6 | -1.427012 | 3.921359  | 11.250445 |
| 6 | -2.682491 | 3.196508  | 11.250445 |
| 6 | -3.916292 | -1.427908 | 10.000909 |
| 6 | -3.194751 | -2.677654 | 10.000909 |
| 6 | -0.721541 | -4.105562 | 10.000909 |
| 6 | 0.721541  | -4.105562 | 10.000909 |
| 6 | 3.194751  | -2.677654 | 10.000909 |
| 6 | 3.916292  | -1.427908 | 10.000909 |
| 6 | 3.916292  | 1.427908  | 10.000909 |
| 6 | 3.194751  | 2.677654  | 10.000909 |
| 6 | 0.721541  | 4.105562  | 10.000909 |
| 6 | -0.721541 | 4.105562  | 10.000909 |
| 6 | -3.194751 | 2.677654  | 10.000909 |
| 6 | -3.916292 | 1.427908  | 10.000909 |
| 6 | -2.679297 | -3.195328 | 8.747802  |
| 6 | -1.427587 | -3.918003 | 8.747802  |
| 6 | 1.427587  | -3.918003 | 8.747802  |
| 6 | 2.679297  | -3.195328 | 8.747802  |
| 6 | 4.106883  | -0.722675 | 8.747802  |
| 6 | 4.106883  | 0.722675  | 8.747802  |
| 6 | 2.679297  | 3.195328  | 8.747802  |
| 6 | 1.427587  | 3.918003  | 8.747802  |
| 6 | -1.427587 | 3.918003  | 8.747802  |
| 6 | -2.679297 | 3.195328  | 8.747802  |
| 6 | -4.106883 | 0.722675  | 8.747802  |
| 6 | -4.106883 | -0.722675 | 8.747802  |
| 6 | -0.724885 | -4.109541 | 7.500277  |
| 6 | 0.724885  | -4.109541 | 7.500277  |
| 6 | 3.196525  | -2.682539 | 7.500277  |
| 6 | 3.921410  | -1.427002 | 7.500277  |
| 6 | 3.921410  | 1.427002  | 7.500277  |
| 6 | 3.196525  | 2.682539  | 7.500277  |
| 6 | 0.724885  | 4.109541  | 7.500277  |
| 6 | -0.724885 | 4.109541  | 7.500277  |
| 6 | -3.196525 | 2.682539  | 7.500277  |
| 6 | -3.921410 | 1.427002  | 7.500277  |
| 6 | -3.921410 | -1.427002 | 7.500277  |
| 6 | -3.196525 | -2.682539 | 7.500277  |
| 6 | 1.427849  | -3.916617 | 6.251186  |
| 6 | 2.677965  | -3.194862 | 6.251186  |
| 6 | 4.105814  | -0.721755 | 6.251186  |
| 6 | 4.105814  | 0.721755  | 6.251186  |
| 6 | 2.677965  | 3.194862  | 6.251186  |
| 6 | 1.427849  | 3.916617  | 6.251186  |
| 6 | -1.427849 | 3.916617  | 6.251186  |
| 6 | -2.677965 | 3.194862  | 6.251186  |
| 6 | -4.105814 | 0.721755  | 6.251186  |
| 6 | -4.105814 | -0.721755 | 6.251186  |
| 6 | -2.677965 | -3.194862 | 6.251186  |
| 6 | -1.427849 | -3.916617 | 6.251186  |
| 6 | 3.195205  | -2.678938 | 4.998037  |
| 6 | 3.917631  | -1.427660 | 4.998037  |
| 6 | 3.917631  | 1.427660  | 4.998037  |
| 6 | 3.195205  | 2.678938  | 4.998037  |
| 6 | 0.722426  | 4.106598  | 4.998037  |
| 6 | -0.722426 | 4.106598  | 4.998037  |
| 6 | -3.195205 | 2.678938  | 4.998037  |
| 6 | -3.917631 | 1.427660  | 4.998037  |
| 6 | -3.917631 | -1.427660 | 4.998037  |

|   |           |           |           |
|---|-----------|-----------|-----------|
| 6 | -3.195205 | -2.678938 | 4.998037  |
| 6 | -0.722426 | -4.106598 | 4.998037  |
| 6 | 0.722426  | -4.106598 | 4.998037  |
| 6 | 4.109563  | -0.724903 | 3.750136  |
| 6 | 4.109563  | 0.724903  | 3.750136  |
| 6 | 2.682566  | 3.196535  | 3.750136  |
| 6 | 1.426997  | 3.921438  | 3.750136  |
| 6 | -1.426997 | 3.921438  | 3.750136  |
| 6 | -2.682566 | 3.196535  | 3.750136  |
| 6 | -4.109563 | 0.724903  | 3.750136  |
| 6 | -4.109563 | -0.724903 | 3.750136  |
| 6 | -2.682566 | -3.196535 | 3.750136  |
| 6 | -1.426997 | -3.921438 | 3.750136  |
| 6 | 1.426997  | -3.921438 | 3.750136  |
| 6 | 2.682566  | -3.196535 | 3.750136  |
| 6 | 3.916956  | 1.427788  | 2.501457  |
| 6 | 3.194978  | 2.678289  | 2.501457  |
| 6 | 0.721977  | 4.106077  | 2.501457  |
| 6 | -0.721977 | 4.106077  | 2.501457  |
| 6 | -3.194978 | 2.678289  | 2.501457  |
| 6 | -3.916956 | 1.427788  | 2.501457  |
| 6 | -3.916956 | -1.427788 | 2.501457  |
| 6 | -3.194978 | -2.678289 | 2.501457  |
| 6 | -0.721977 | -4.106077 | 2.501457  |
| 6 | 0.721977  | -4.106077 | 2.501457  |
| 6 | 3.194978  | -2.678289 | 2.501457  |
| 6 | 3.916956  | -1.427788 | 2.501457  |
| 6 | 2.678615  | 3.195091  | 1.248283  |
| 6 | 1.427722  | 3.917294  | 1.248283  |
| 6 | -1.427722 | 3.917294  | 1.248283  |
| 6 | -2.678615 | 3.195091  | 1.248283  |
| 6 | -4.106338 | 0.722203  | 1.248283  |
| 6 | -4.106338 | -0.722203 | 1.248283  |
| 6 | -2.678615 | -3.195091 | 1.248283  |
| 6 | -1.427722 | -3.917294 | 1.248283  |
| 6 | 1.427722  | -3.917294 | 1.248283  |
| 6 | 2.678615  | -3.195091 | 1.248283  |
| 6 | 4.106338  | -0.722203 | 1.248283  |
| 6 | 4.106338  | 0.722203  | 1.248283  |
| 6 | 0.724914  | 4.109584  | 0.000000  |
| 6 | -0.724914 | 4.109584  | 0.000000  |
| 6 | -3.196547 | 2.682586  | 0.000000  |
| 6 | -3.921461 | 1.426998  | 0.000000  |
| 6 | -3.921461 | -1.426998 | 0.000000  |
| 6 | -3.196547 | -2.682586 | 0.000000  |
| 6 | -0.724914 | -4.109584 | 0.000000  |
| 6 | 0.724914  | -4.109584 | 0.000000  |
| 6 | 3.196547  | -2.682586 | 0.000000  |
| 6 | 3.921461  | -1.426998 | 0.000000  |
| 6 | 3.921461  | 1.426998  | 0.000000  |
| 6 | 3.196547  | 2.682586  | 0.000000  |
| 6 | -1.427722 | 3.917294  | -1.248283 |
| 6 | -2.678615 | 3.195091  | -1.248283 |
| 6 | -4.106338 | 0.722203  | -1.248283 |
| 6 | -4.106338 | -0.722203 | -1.248283 |
| 6 | -2.678615 | -3.195091 | -1.248283 |
| 6 | -1.427722 | -3.917294 | -1.248283 |
| 6 | 1.427722  | -3.917294 | -1.248283 |
| 6 | 2.678615  | -3.195091 | -1.248283 |
| 6 | 4.106338  | -0.722203 | -1.248283 |
| 6 | 4.106338  | 0.722203  | -1.248283 |
| 6 | 2.678615  | 3.195091  | -1.248283 |
| 6 | 1.427722  | 3.917294  | -1.248283 |
| 6 | -3.194978 | 2.678289  | -2.501457 |
| 6 | -3.916956 | 1.427788  | -2.501457 |
| 6 | -3.916956 | -1.427788 | -2.501457 |
| 6 | -3.194978 | -2.678289 | -2.501457 |
| 6 | -0.721977 | -4.106077 | -2.501457 |
| 6 | 0.721977  | -4.106077 | -2.501457 |
| 6 | 3.194978  | -2.678289 | -2.501457 |

|   |           |           |            |
|---|-----------|-----------|------------|
| 6 | 3.916956  | -1.427788 | -2.501457  |
| 6 | 3.916956  | 1.427788  | -2.501457  |
| 6 | 3.194978  | 2.678289  | -2.501457  |
| 6 | 0.721977  | 4.106077  | -2.501457  |
| 6 | -0.721977 | 4.106077  | -2.501457  |
| 6 | -4.109563 | 0.724903  | -3.750136  |
| 6 | -4.109563 | -0.724903 | -3.750136  |
| 6 | -2.682566 | -3.196535 | -3.750136  |
| 6 | -1.426997 | -3.921438 | -3.750136  |
| 6 | 1.426997  | -3.921438 | -3.750136  |
| 6 | 2.682566  | -3.196535 | -3.750136  |
| 6 | 4.109563  | -0.724903 | -3.750136  |
| 6 | 4.109563  | 0.724903  | -3.750136  |
| 6 | 2.682566  | 3.196535  | -3.750136  |
| 6 | 1.426997  | 3.921438  | -3.750136  |
| 6 | -1.426997 | 3.921438  | -3.750136  |
| 6 | -2.682566 | 3.196535  | -3.750136  |
| 6 | -3.917631 | -1.427660 | -4.998037  |
| 6 | -3.195205 | -2.678938 | -4.998037  |
| 6 | -0.722426 | -4.106598 | -4.998037  |
| 6 | 0.722426  | -4.106598 | -4.998037  |
| 6 | 3.195205  | -2.678938 | -4.998037  |
| 6 | 3.917631  | -1.427660 | -4.998037  |
| 6 | 3.917631  | 1.427660  | -4.998037  |
| 6 | 3.195205  | 2.678938  | -4.998037  |
| 6 | 0.722426  | 4.106598  | -4.998037  |
| 6 | -0.722426 | 4.106598  | -4.998037  |
| 6 | -3.195205 | 2.678938  | -4.998037  |
| 6 | -3.917631 | 1.427660  | -4.998037  |
| 6 | -2.677965 | -3.194862 | -6.251186  |
| 6 | -1.427849 | -3.916617 | -6.251186  |
| 6 | 1.427849  | -3.916617 | -6.251186  |
| 6 | 2.677965  | -3.194862 | -6.251186  |
| 6 | 4.105814  | -0.721755 | -6.251186  |
| 6 | 4.105814  | 0.721755  | -6.251186  |
| 6 | 2.677965  | 3.194862  | -6.251186  |
| 6 | 1.427849  | 3.916617  | -6.251186  |
| 6 | -1.427849 | 3.916617  | -6.251186  |
| 6 | -2.677965 | 3.194862  | -6.251186  |
| 6 | -4.105814 | 0.721755  | -6.251186  |
| 6 | -4.105814 | -0.721755 | -6.251186  |
| 6 | -0.724885 | -4.109541 | -7.500277  |
| 6 | 0.724885  | -4.109541 | -7.500277  |
| 6 | 3.196525  | -2.682539 | -7.500277  |
| 6 | 3.921410  | -1.427002 | -7.500277  |
| 6 | 3.921410  | 1.427002  | -7.500277  |
| 6 | 3.196525  | 2.682539  | -7.500277  |
| 6 | 0.724885  | 4.109541  | -7.500277  |
| 6 | -0.724885 | 4.109541  | -7.500277  |
| 6 | -3.196525 | 2.682539  | -7.500277  |
| 6 | -3.921410 | 1.427002  | -7.500277  |
| 6 | -3.921410 | -1.427002 | -7.500277  |
| 6 | -3.196525 | -2.682539 | -7.500277  |
| 6 | 1.427587  | -3.918003 | -8.747802  |
| 6 | 2.679297  | -3.195328 | -8.747802  |
| 6 | 4.106883  | -0.722675 | -8.747802  |
| 6 | 4.106883  | 0.722675  | -8.747802  |
| 6 | 2.679297  | 3.195328  | -8.747802  |
| 6 | 1.427587  | 3.918003  | -8.747802  |
| 6 | -1.427587 | 3.918003  | -8.747802  |
| 6 | -2.679297 | 3.195328  | -8.747802  |
| 6 | -4.106883 | 0.722675  | -8.747802  |
| 6 | -4.106883 | -0.722675 | -8.747802  |
| 6 | -2.679297 | -3.195328 | -8.747802  |
| 6 | -1.427587 | -3.918003 | -8.747802  |
| 6 | 3.194751  | -2.677654 | -10.000909 |
| 6 | 3.916292  | -1.427908 | -10.000909 |
| 6 | 3.916292  | 1.427908  | -10.000909 |
| 6 | 3.194751  | 2.677654  | -10.000909 |
| 6 | 0.721541  | 4.105562  | -10.000909 |

|   |           |           |            |
|---|-----------|-----------|------------|
| 6 | -0.721541 | 4.105562  | -10.000909 |
| 6 | -3.194751 | 2.677654  | -10.000909 |
| 6 | -3.916292 | 1.427908  | -10.000909 |
| 6 | -3.916292 | -1.427908 | -10.000909 |
| 6 | -3.194751 | -2.677654 | -10.000909 |
| 6 | -0.721541 | -4.105562 | -10.000909 |
| 6 | 0.721541  | -4.105562 | -10.000909 |
| 6 | 4.109503  | -0.724851 | -11.250445 |
| 6 | 4.109503  | 0.724851  | -11.250445 |
| 6 | 2.682491  | 3.196508  | -11.250445 |
| 6 | 1.427012  | 3.921359  | -11.250445 |
| 6 | -1.427012 | 3.921359  | -11.250445 |
| 6 | -2.682491 | 3.196508  | -11.250445 |
| 6 | -4.109503 | 0.724851  | -11.250445 |
| 6 | -4.109503 | -0.724851 | -11.250445 |
| 6 | -2.682491 | -3.196508 | -11.250445 |
| 6 | -1.427012 | -3.921359 | -11.250445 |
| 6 | 1.427012  | -3.921359 | -11.250445 |
| 6 | 2.682491  | -3.196508 | -11.250445 |
| 6 | 3.918381  | 1.427514  | -12.497586 |
| 6 | 3.195454  | 2.679660  | -12.497586 |
| 6 | 0.722927  | 4.107175  | -12.497586 |
| 6 | -0.722927 | 4.107175  | -12.497586 |
| 6 | -3.195454 | 2.679660  | -12.497586 |
| 6 | -3.918381 | 1.427514  | -12.497586 |
| 6 | -3.918381 | -1.427514 | -12.497586 |
| 6 | -3.195454 | -2.679660 | -12.497586 |
| 6 | -0.722927 | -4.107175 | -12.497586 |
| 6 | 0.722927  | -4.107175 | -12.497586 |
| 6 | 3.195454  | -2.679660 | -12.497586 |
| 6 | 3.918381  | -1.427514 | -12.497586 |
| 6 | 2.677316  | 3.194628  | -13.750623 |
| 6 | 1.427971  | 3.915938  | -13.750623 |
| 6 | -1.427971 | 3.915938  | -13.750623 |
| 6 | -2.677316 | 3.194628  | -13.750623 |
| 6 | -4.105288 | 0.721310  | -13.750623 |
| 6 | -4.105288 | -0.721310 | -13.750623 |
| 6 | -2.677316 | -3.194628 | -13.750623 |
| 6 | -1.427971 | -3.915938 | -13.750623 |
| 6 | 1.427971  | -3.915938 | -13.750623 |
| 6 | 2.677316  | -3.194628 | -13.750623 |
| 6 | 4.105288  | -0.721310 | -13.750623 |
| 6 | 4.105288  | 0.721310  | -13.750623 |
| 6 | 0.724811  | 4.109455  | -15.000640 |
| 6 | -0.724811 | 4.109455  | -15.000640 |
| 6 | -3.196487 | 2.682432  | -15.000640 |
| 6 | -3.921298 | 1.427023  | -15.000640 |
| 6 | -3.921298 | -1.427023 | -15.000640 |
| 6 | -3.196487 | -2.682432 | -15.000640 |
| 6 | -0.724811 | -4.109455 | -15.000640 |
| 6 | 0.724811  | -4.109455 | -15.000640 |
| 6 | 3.196487  | -2.682432 | -15.000640 |
| 6 | 3.921298  | -1.427023 | -15.000640 |
| 6 | 3.921298  | 1.427023  | -15.000640 |
| 6 | 3.196487  | 2.682432  | -15.000640 |
| 6 | -1.427428 | 3.918812  | -16.247375 |
| 6 | -2.680077 | 3.195595  | -16.247375 |
| 6 | -4.107505 | 0.723217  | -16.247375 |
| 6 | -4.107505 | -0.723217 | -16.247375 |
| 6 | -2.680077 | -3.195595 | -16.247375 |
| 6 | -1.427428 | -3.918812 | -16.247375 |
| 6 | 1.427428  | -3.918812 | -16.247375 |
| 6 | 2.680077  | -3.195595 | -16.247375 |
| 6 | 4.107505  | -0.723217 | -16.247375 |
| 6 | 4.107505  | 0.723217  | -16.247375 |
| 6 | 2.680077  | 3.195595  | -16.247375 |
| 6 | 1.427428  | 3.918812  | -16.247375 |
| 6 | -3.194498 | 2.676957  | -17.500331 |
| 6 | -3.915562 | 1.428038  | -17.500331 |
| 6 | -3.915562 | -1.428038 | -17.500331 |

|   |           |           |            |
|---|-----------|-----------|------------|
| 6 | -3.194498 | -2.676957 | -17.500331 |
| 6 | -0.721063 | -4.104995 | -17.500331 |
| 6 | 0.721063  | -4.104995 | -17.500331 |
| 6 | 3.194498  | -2.676957 | -17.500331 |
| 6 | 3.915562  | -1.428038 | -17.500331 |
| 6 | 3.915562  | 1.428038  | -17.500331 |
| 6 | 3.194498  | 2.676957  | -17.500331 |
| 6 | 0.721063  | 4.104995  | -17.500331 |
| 6 | -0.721063 | 4.104995  | -17.500331 |
| 6 | -4.109398 | 0.724761  | -18.750899 |
| 6 | -4.109398 | -0.724761 | -18.750899 |
| 6 | -2.682360 | -3.196462 | -18.750899 |
| 6 | -1.427037 | -3.921223 | -18.750899 |
| 6 | 1.427037  | -3.921223 | -18.750899 |
| 6 | 2.682360  | -3.196462 | -18.750899 |
| 6 | 4.109398  | -0.724761 | -18.750899 |
| 6 | 4.109398  | 0.724761  | -18.750899 |
| 6 | 2.682360  | 3.196462  | -18.750899 |
| 6 | 1.427037  | 3.921223  | -18.750899 |
| 6 | -1.427037 | 3.921223  | -18.750899 |
| 6 | -2.682360 | 3.196462  | -18.750899 |
| 6 | -3.919293 | -1.427331 | -19.997175 |
| 6 | -3.195751 | -2.680541 | -19.997175 |
| 6 | -0.723541 | -4.107872 | -19.997175 |
| 6 | 0.723541  | -4.107872 | -19.997175 |
| 6 | 3.195751  | -2.680541 | -19.997175 |
| 6 | 3.919293  | -1.427331 | -19.997175 |
| 6 | 3.919293  | 1.427331  | -19.997175 |
| 6 | 3.195751  | 2.680541  | -19.997175 |
| 6 | 0.723541  | 4.107872  | -19.997175 |
| 6 | -0.723541 | 4.107872  | -19.997175 |
| 6 | -3.195751 | 2.680541  | -19.997175 |
| 6 | -3.919293 | 1.427331  | -19.997175 |
| 6 | -2.676503 | -3.194327 | -21.250020 |
| 6 | -1.428117 | -3.915083 | -21.250020 |
| 6 | 1.428117  | -3.915083 | -21.250020 |
| 6 | 2.676503  | -3.194327 | -21.250020 |
| 6 | 4.104620  | -0.720756 | -21.250020 |
| 6 | 4.104620  | 0.720756  | -21.250020 |
| 6 | 2.676503  | 3.194327  | -21.250020 |
| 6 | 1.428117  | 3.915083  | -21.250020 |
| 6 | -1.428117 | 3.915083  | -21.250020 |
| 6 | -2.676503 | 3.194327  | -21.250020 |
| 6 | -4.104620 | 0.720756  | -21.250020 |
| 6 | -4.104620 | -0.720756 | -21.250020 |
| 6 | -0.724709 | -4.109307 | -22.501261 |
| 6 | 0.724709  | -4.109307 | -22.501261 |
| 6 | 3.196410  | -2.682270 | -22.501261 |
| 6 | 3.921118  | -1.427037 | -22.501261 |
| 6 | 3.921118  | 1.427037  | -22.501261 |
| 6 | 3.196410  | 2.682270  | -22.501261 |
| 6 | 0.724709  | 4.109307  | -22.501261 |
| 6 | -0.724709 | 4.109307  | -22.501261 |
| 6 | -3.196410 | 2.682270  | -22.501261 |
| 6 | -3.921118 | 1.427037  | -22.501261 |
| 6 | -3.921118 | -1.427037 | -22.501261 |
| 6 | -3.196410 | -2.682270 | -22.501261 |
| 6 | 1.427182  | -3.919877 | -23.746965 |
| 6 | 2.681122  | -3.195915 | -23.746965 |
| 6 | 4.108304  | -0.723962 | -23.746965 |
| 6 | 4.108304  | 0.723962  | -23.746965 |
| 6 | 2.681122  | 3.195915  | -23.746965 |
| 6 | 1.427182  | 3.919877  | -23.746965 |
| 6 | -1.427182 | 3.919877  | -23.746965 |
| 6 | -2.681122 | 3.195915  | -23.746965 |
| 6 | -4.108304 | 0.723962  | -23.746965 |
| 6 | -4.108304 | -0.723962 | -23.746965 |
| 6 | -2.681122 | -3.195915 | -23.746965 |
| 6 | -1.427182 | -3.919877 | -23.746965 |
| 6 | 3.194106  | -2.675885 | -24.999671 |



|   |           |           |            |
|---|-----------|-----------|------------|
| 6 | 3.914438  | -1.428235 | -24.999671 |
| 6 | 3.914438  | 1.428235  | -24.999671 |
| 6 | 3.194106  | 2.675885  | -24.999671 |
| 6 | 0.720331  | 4.104120  | -24.999671 |
| 6 | -0.720331 | 4.104120  | -24.999671 |
| 6 | -3.194106 | 2.675885  | -24.999671 |
| 6 | -3.914438 | 1.428235  | -24.999671 |
| 6 | -3.914438 | -1.428235 | -24.999671 |
| 6 | -3.194106 | -2.675885 | -24.999671 |
| 6 | -0.720331 | -4.104120 | -24.999671 |
| 6 | 0.720331  | -4.104120 | -24.999671 |
| 6 | 4.109462  | -0.724710 | -26.251894 |
| 6 | 4.109462  | 0.724710  | -26.251894 |
| 6 | 2.682348  | 3.196543  | -26.251894 |
| 6 | 1.427114  | 3.921253  | -26.251894 |
| 6 | -1.427114 | 3.921253  | -26.251894 |
| 6 | -2.682348 | 3.196543  | -26.251894 |
| 6 | -4.109462 | 0.724710  | -26.251894 |
| 6 | -4.109462 | -0.724710 | -26.251894 |
| 6 | -2.682348 | -3.196543 | -26.251894 |
| 6 | -1.427114 | -3.921253 | -26.251894 |
| 6 | 1.427114  | -3.921253 | -26.251894 |
| 6 | 2.682348  | -3.196543 | -26.251894 |
| 6 | 3.921387  | 1.427214  | -27.496710 |
| 6 | 3.196697  | 2.682414  | -27.496710 |
| 6 | 0.724690  | 4.109628  | -27.496710 |
| 6 | -0.724690 | 4.109628  | -27.496710 |
| 6 | -3.196697 | 2.682414  | -27.496710 |
| 6 | -3.921387 | 1.427214  | -27.496710 |
| 6 | -3.921387 | -1.427214 | -27.496710 |
| 6 | -3.196697 | -2.682414 | -27.496710 |
| 6 | -0.724690 | -4.109628 | -27.496710 |
| 6 | 0.724690  | -4.109628 | -27.496710 |
| 6 | 3.196697  | -2.682414 | -27.496710 |
| 6 | 3.921387  | -1.427214 | -27.496710 |
| 6 | 2.675108  | 3.194292  | -28.749042 |
| 6 | 1.428784  | 3.913858  | -28.749042 |
| 6 | -1.428784 | 3.913858  | -28.749042 |
| 6 | -2.675108 | 3.194292  | -28.749042 |
| 6 | -4.103893 | 0.719565  | -28.749042 |
| 6 | -4.103893 | -0.719565 | -28.749042 |
| 6 | -2.675108 | -3.194292 | -28.749042 |
| 6 | -1.428784 | -3.913858 | -28.749042 |
| 6 | 1.428784  | -3.913858 | -28.749042 |
| 6 | 2.675108  | -3.194292 | -28.749042 |
| 6 | 4.103893  | -0.719565 | -28.749042 |
| 6 | 4.103893  | 0.719565  | -28.749042 |
| 6 | 0.724508  | 4.108382  | -30.003013 |
| 6 | -0.724508 | 4.108382  | -30.003013 |
| 6 | -3.195709 | 2.681633  | -30.003013 |
| 6 | -3.920217 | 1.426749  | -30.003013 |
| 6 | -3.920217 | -1.426749 | -30.003013 |
| 6 | -3.195709 | -2.681633 | -30.003013 |
| 6 | -0.724508 | -4.108382 | -30.003013 |
| 6 | 0.724508  | -4.108382 | -30.003013 |
| 6 | 3.195709  | -2.681633 | -30.003013 |
| 6 | 3.920217  | -1.426749 | -30.003013 |
| 6 | 3.920217  | 1.426749  | -30.003013 |
| 6 | 3.195709  | 2.681633  | -30.003013 |
| 6 | -1.424584 | 3.917805  | -31.246090 |
| 6 | -2.680626 | 3.192629  | -31.246090 |
| 6 | -4.105211 | 0.725176  | -31.246090 |
| 6 | -4.105211 | -0.725176 | -31.246090 |
| 6 | -2.680626 | -3.192629 | -31.246090 |
| 6 | -1.424584 | -3.917805 | -31.246090 |
| 6 | 1.424584  | -3.917805 | -31.246090 |
| 6 | 2.680626  | -3.192629 | -31.246090 |
| 6 | 4.105211  | -0.725176 | -31.246090 |
| 6 | 4.105211  | 0.725176  | -31.246090 |
| 6 | 2.680626  | 3.192629  | -31.246090 |

|   |           |           |            |
|---|-----------|-----------|------------|
| 6 | 1.424584  | 3.917805  | -31.246090 |
| 6 | -3.182680 | 2.664010  | -32.497993 |
| 6 | -3.898441 | 1.424277  | -32.497993 |
| 6 | -3.898441 | -1.424277 | -32.497993 |
| 6 | -3.182680 | -2.664010 | -32.497993 |
| 6 | -0.715761 | -4.088287 | -32.497993 |
| 6 | 0.715761  | -4.088287 | -32.497993 |
| 6 | 3.182680  | -2.664010 | -32.497993 |
| 6 | 3.898441  | -1.424277 | -32.497993 |
| 6 | 3.898441  | 1.424277  | -32.497993 |
| 6 | 3.182680  | 2.664010  | -32.497993 |
| 6 | 0.715761  | 4.088287  | -32.497993 |
| 6 | -0.715761 | 4.088287  | -32.497993 |
| 6 | -4.098028 | 0.725693  | -33.760161 |
| 6 | -4.098028 | -0.725693 | -33.760161 |
| 6 | -2.677483 | -3.186149 | -33.760161 |
| 6 | -1.420545 | -3.911843 | -33.760161 |
| 6 | 1.420545  | -3.911843 | -33.760161 |
| 6 | 2.677483  | -3.186149 | -33.760161 |
| 6 | 4.098028  | -0.725693 | -33.760161 |
| 6 | 4.098028  | 0.725693  | -33.760161 |
| 6 | 2.677483  | 3.186149  | -33.760161 |
| 6 | 1.420545  | 3.911843  | -33.760161 |
| 6 | -1.420545 | 3.911843  | -33.760161 |
| 6 | -2.677483 | 3.186149  | -33.760161 |
| 6 | -3.961800 | -1.437325 | -35.000194 |
| 6 | -3.225659 | -2.712357 | -35.000194 |
| 6 | -0.736140 | -4.149681 | -35.000194 |
| 6 | 0.736140  | -4.149681 | -35.000194 |
| 6 | 3.225659  | -2.712357 | -35.000194 |
| 6 | 3.961800  | -1.437325 | -35.000194 |
| 6 | 3.961800  | 1.437325  | -35.000194 |
| 6 | 3.225659  | 2.712357  | -35.000194 |
| 6 | 0.736140  | 4.149681  | -35.000194 |
| 6 | -0.736140 | 4.149681  | -35.000194 |
| 6 | -3.225659 | 2.712357  | -35.000194 |
| 6 | -3.961800 | 1.437325  | -35.000194 |
| 6 | -2.706864 | -3.302904 | -36.214094 |
| 6 | -1.506967 | -3.995665 | -36.214094 |
| 6 | 1.506967  | -3.995665 | -36.214094 |
| 6 | 2.706864  | -3.302904 | -36.214094 |
| 6 | 4.213831  | -0.692761 | -36.214094 |
| 6 | 4.213831  | 0.692761  | -36.214094 |
| 6 | 2.706864  | 3.302904  | -36.214094 |
| 6 | 1.506967  | 3.995665  | -36.214094 |
| 6 | -1.506967 | 3.995665  | -36.214094 |
| 6 | -2.706864 | 3.302904  | -36.214094 |
| 6 | -4.213831 | 0.692761  | -36.214094 |
| 6 | -4.213831 | -0.692761 | -36.214094 |
| 1 | 1.074940  | -4.315093 | 37.171186  |
| 1 | 3.199510  | -3.088472 | 37.171186  |
| 1 | 4.274450  | -1.226621 | 37.171186  |
| 1 | 4.274450  | 1.226621  | 37.171186  |
| 1 | 3.199510  | 3.088472  | 37.171186  |
| 1 | 1.074940  | 4.315093  | 37.171186  |
| 1 | -1.074940 | 4.315093  | 37.171186  |
| 1 | -3.199510 | 3.088472  | 37.171186  |
| 1 | -4.274450 | 1.226621  | 37.171186  |
| 1 | -4.274450 | -1.226621 | 37.171186  |
| 1 | -3.199510 | -3.088472 | 37.171186  |
| 1 | -1.074940 | -4.315093 | 37.171186  |
| 1 | -3.199510 | -3.088472 | -37.171186 |
| 1 | -1.074940 | -4.315093 | -37.171186 |
| 1 | 1.074940  | -4.315093 | -37.171186 |
| 1 | 3.199510  | -3.088472 | -37.171186 |
| 1 | 4.274450  | -1.226621 | -37.171186 |
| 1 | 4.274450  | 1.226621  | -37.171186 |
| 1 | 3.199510  | 3.088472  | -37.171186 |
| 1 | 1.074940  | 4.315093  | -37.171186 |
| 1 | -1.074940 | 4.315093  | -37.171186 |

|   |           |           |            |
|---|-----------|-----------|------------|
| 1 | -3.199510 | 3.088472  | -37.171186 |
| 1 | -4.274450 | 1.226621  | -37.171186 |
| 1 | -4.274450 | -1.226621 | -37.171186 |

Nanotube (6,6) u30v0s  
B3LYP/STO-3G Energy: -27120.523886

|   |           |           |           |
|---|-----------|-----------|-----------|
| 6 | -1.427094 | -3.919159 | -0.623565 |
| 6 | -2.680544 | -3.195479 | -0.623565 |
| 6 | -1.427094 | 3.919159  | -0.623565 |
| 6 | -2.680544 | 3.195479  | -0.623565 |
| 6 | -4.107638 | -0.723679 | -0.623565 |
| 6 | -4.107638 | 0.723679  | -0.623565 |
| 6 | 1.427094  | 3.919159  | -0.623565 |
| 6 | 2.680544  | 3.195479  | -0.623565 |
| 6 | 1.427094  | -3.919159 | -0.623565 |
| 6 | 2.680544  | -3.195479 | -0.623565 |
| 6 | 4.107638  | 0.723679  | -0.623565 |
| 6 | 4.107638  | -0.723679 | -0.623565 |
| 6 | 0.720819  | 4.104213  | -1.875241 |
| 6 | -0.720819 | 4.104213  | -1.875241 |
| 6 | -3.193943 | -2.676355 | -1.875241 |
| 6 | -3.914763 | -1.427859 | -1.875241 |
| 6 | -3.193943 | 2.676355  | -1.875241 |
| 6 | -3.914763 | 1.427859  | -1.875241 |
| 6 | -0.720819 | -4.104213 | -1.875241 |
| 6 | 0.720819  | -4.104213 | -1.875241 |
| 6 | 3.193943  | 2.676355  | -1.875241 |
| 6 | 3.914763  | 1.427859  | -1.875241 |
| 6 | 3.193943  | -2.676355 | -1.875241 |
| 6 | 3.914763  | -1.427859 | -1.875241 |
| 6 | -1.427202 | -3.918561 | -3.127551 |
| 6 | -2.679972 | -3.195273 | -3.127551 |
| 6 | -1.427202 | 3.918561  | -3.127551 |
| 6 | -2.679972 | 3.195273  | -3.127551 |
| 6 | -4.107174 | -0.723287 | -3.127551 |
| 6 | -4.107174 | 0.723287  | -3.127551 |
| 6 | 1.427202  | 3.918561  | -3.127551 |
| 6 | 2.679972  | 3.195273  | -3.127551 |
| 6 | 1.427202  | -3.918561 | -3.127551 |
| 6 | 2.679972  | -3.195273 | -3.127551 |
| 6 | 4.107174  | 0.723287  | -3.127551 |
| 6 | 4.107174  | -0.723287 | -3.127551 |
| 6 | 0.724025  | 4.108067  | -4.374753 |
| 6 | -0.724025 | 4.108067  | -4.374753 |
| 6 | -3.195678 | -2.681057 | -4.374753 |
| 6 | -3.919703 | -1.427010 | -4.374753 |
| 6 | -3.195678 | 2.681057  | -4.374753 |
| 6 | -3.919703 | 1.427010  | -4.374753 |
| 6 | -0.724025 | -4.108067 | -4.374753 |
| 6 | 0.724025  | -4.108067 | -4.374753 |
| 6 | 3.195678  | 2.681057  | -4.374753 |
| 6 | 3.919703  | 1.427010  | -4.374753 |
| 6 | 3.195678  | -2.681057 | -4.374753 |
| 6 | 3.919703  | -1.427010 | -4.374753 |
| 6 | -1.427826 | -3.914878 | -5.625724 |
| 6 | -2.676471 | -3.193973 | -5.625724 |
| 6 | -1.427826 | 3.914878  | -5.625724 |
| 6 | -2.676471 | 3.193973  | -5.625724 |
| 6 | -4.104297 | -0.720905 | -5.625724 |
| 6 | -4.104297 | 0.720905  | -5.625724 |
| 6 | 1.427826  | 3.914878  | -5.625724 |
| 6 | 2.676471  | 3.193973  | -5.625724 |
| 6 | 1.427826  | -3.914878 | -5.625724 |
| 6 | 2.676471  | -3.193973 | -5.625724 |
| 6 | 4.104297  | 0.720905  | -5.625724 |
| 6 | 4.104297  | -0.720905 | -5.625724 |
| 6 | 0.722843  | 4.106659  | -6.878597 |

|   |           |           |           |
|---|-----------|-----------|-----------|
| 6 | -0.722843 | 4.106659  | -6.878597 |
| 6 | -3.195050 | -2.679330 | -6.878597 |
| 6 | -3.917893 | -1.427329 | -6.878597 |
| 6 | -3.195050 | 2.679330  | -6.878597 |
| 6 | -3.917893 | 1.427329  | -6.878597 |
| 6 | -0.722843 | -4.106659 | -6.878597 |
| 6 | 0.722843  | -4.106659 | -6.878597 |
| 6 | 3.195050  | 2.679330  | -6.878597 |
| 6 | 3.917893  | 1.427329  | -6.878597 |
| 6 | 3.195050  | -2.679330 | -6.878597 |
| 6 | 3.917893  | -1.427329 | -6.878597 |
| 6 | -1.426915 | -3.920175 | -8.126012 |
| 6 | -2.681514 | -3.195832 | -8.126012 |
| 6 | -1.426915 | 3.920175  | -8.126012 |
| 6 | -2.681514 | 3.195832  | -8.126012 |
| 6 | -4.108429 | -0.724343 | -8.126012 |
| 6 | -4.108429 | 0.724343  | -8.126012 |
| 6 | 1.426915  | 3.920175  | -8.126012 |
| 6 | 2.681514  | 3.195832  | -8.126012 |
| 6 | 1.426915  | -3.920175 | -8.126012 |
| 6 | 2.681514  | -3.195832 | -8.126012 |
| 6 | 4.108429  | 0.724343  | -8.126012 |
| 6 | 4.108429  | -0.724343 | -8.126012 |
| 6 | 0.721062  | 4.104496  | -9.376222 |
| 6 | -0.721062 | 4.104496  | -9.376222 |
| 6 | -3.194067 | -2.676706 | -9.376222 |
| 6 | -3.915129 | -1.427790 | -9.376222 |
| 6 | -3.194067 | 2.676706  | -9.376222 |
| 6 | -3.915129 | 1.427790  | -9.376222 |
| 6 | -0.721062 | -4.104496 | -9.376222 |
| 6 | 0.721062  | -4.104496 | -9.376222 |
| 6 | 3.194067  | 2.676706  | -9.376222 |
| 6 | 3.915129  | 1.427790  | -9.376222 |
| 6 | 3.194067  | -2.676706 | -9.376222 |
| 6 | 3.915129  | -1.427790 | -9.376222 |
| 6 | 0.723679  | 4.107638  | 0.623565  |
| 6 | -0.723679 | 4.107638  | 0.623565  |
| 6 | -3.195479 | -2.680544 | 0.623565  |
| 6 | -3.919159 | -1.427094 | 0.623565  |
| 6 | -3.195479 | 2.680544  | 0.623565  |
| 6 | -3.919159 | 1.427094  | 0.623565  |
| 6 | -0.723679 | -4.107638 | 0.623565  |
| 6 | 0.723679  | -4.107638 | 0.623565  |
| 6 | 3.195479  | 2.680544  | 0.623565  |
| 6 | 3.919159  | 1.427094  | 0.623565  |
| 6 | 3.195479  | -2.680544 | 0.623565  |
| 6 | 3.919159  | -1.427094 | 0.623565  |
| 6 | -1.427859 | -3.914763 | 1.875241  |
| 6 | -2.676355 | -3.193943 | 1.875241  |
| 6 | -1.427859 | 3.914763  | 1.875241  |
| 6 | -2.676355 | 3.193943  | 1.875241  |
| 6 | -4.104213 | -0.720819 | 1.875241  |
| 6 | -4.104213 | 0.720819  | 1.875241  |
| 6 | 1.427859  | 3.914763  | 1.875241  |
| 6 | 2.676355  | 3.193943  | 1.875241  |
| 6 | 1.427859  | -3.914763 | 1.875241  |
| 6 | 2.676355  | -3.193943 | 1.875241  |
| 6 | 4.104213  | 0.720819  | 1.875241  |
| 6 | 4.104213  | -0.720819 | 1.875241  |
| 6 | 0.723287  | 4.107174  | 3.127551  |
| 6 | -0.723287 | 4.107174  | 3.127551  |
| 6 | -3.195273 | -2.679972 | 3.127551  |
| 6 | -3.918561 | -1.427202 | 3.127551  |
| 6 | -3.195273 | 2.679972  | 3.127551  |
| 6 | -3.918561 | 1.427202  | 3.127551  |
| 6 | -0.723287 | -4.107174 | 3.127551  |
| 6 | 0.723287  | -4.107174 | 3.127551  |
| 6 | 3.195273  | 2.679972  | 3.127551  |
| 6 | 3.918561  | 1.427202  | 3.127551  |
| 6 | 3.195273  | -2.679972 | 3.127551  |

|   |           |           |            |
|---|-----------|-----------|------------|
| 6 | 3.918561  | -1.427202 | 3.127551   |
| 6 | -1.427010 | -3.919703 | 4.374753   |
| 6 | -2.681057 | -3.195678 | 4.374753   |
| 6 | -1.427010 | 3.919703  | 4.374753   |
| 6 | -2.681057 | 3.195678  | 4.374753   |
| 6 | -4.108067 | -0.724025 | 4.374753   |
| 6 | -4.108067 | 0.724025  | 4.374753   |
| 6 | 1.427010  | 3.919703  | 4.374753   |
| 6 | 2.681057  | 3.195678  | 4.374753   |
| 6 | 1.427010  | -3.919703 | 4.374753   |
| 6 | 2.681057  | -3.195678 | 4.374753   |
| 6 | 4.108067  | 0.724025  | 4.374753   |
| 6 | 4.108067  | -0.724025 | 4.374753   |
| 6 | 0.720905  | 4.104297  | 5.625724   |
| 6 | -0.720905 | 4.104297  | 5.625724   |
| 6 | -3.193973 | -2.676471 | 5.625724   |
| 6 | -3.914878 | -1.427826 | 5.625724   |
| 6 | -3.193973 | 2.676471  | 5.625724   |
| 6 | -3.914878 | 1.427826  | 5.625724   |
| 6 | -0.720905 | -4.104297 | 5.625724   |
| 6 | 0.720905  | -4.104297 | 5.625724   |
| 6 | 3.193973  | 2.676471  | 5.625724   |
| 6 | 3.914878  | 1.427826  | 5.625724   |
| 6 | 3.193973  | -2.676471 | 5.625724   |
| 6 | 3.914878  | -1.427826 | 5.625724   |
| 6 | -1.427329 | -3.917893 | 6.878597   |
| 6 | -2.679330 | -3.195050 | 6.878597   |
| 6 | -1.427329 | 3.917893  | 6.878597   |
| 6 | -2.679330 | 3.195050  | 6.878597   |
| 6 | -4.106659 | -0.722843 | 6.878597   |
| 6 | -4.106659 | 0.722843  | 6.878597   |
| 6 | 1.427329  | 3.917893  | 6.878597   |
| 6 | 2.679330  | 3.195050  | 6.878597   |
| 6 | 1.427329  | -3.917893 | 6.878597   |
| 6 | 2.679330  | -3.195050 | 6.878597   |
| 6 | 4.106659  | 0.722843  | 6.878597   |
| 6 | 4.106659  | -0.722843 | 6.878597   |
| 6 | 0.724343  | 4.108429  | 8.126012   |
| 6 | -0.724343 | 4.108429  | 8.126012   |
| 6 | -3.195832 | -2.681514 | 8.126012   |
| 6 | -3.920175 | -1.426915 | 8.126012   |
| 6 | -3.195832 | 2.681514  | 8.126012   |
| 6 | -3.920175 | 1.426915  | 8.126012   |
| 6 | -0.724343 | -4.108429 | 8.126012   |
| 6 | 0.724343  | -4.108429 | 8.126012   |
| 6 | 3.195832  | 2.681514  | 8.126012   |
| 6 | 3.920175  | 1.426915  | 8.126012   |
| 6 | 3.195832  | -2.681514 | 8.126012   |
| 6 | 3.920175  | -1.426915 | 8.126012   |
| 6 | -1.427790 | -3.915129 | 9.376222   |
| 6 | -2.676706 | -3.194067 | 9.376222   |
| 6 | -1.427790 | 3.915129  | 9.376222   |
| 6 | -2.676706 | 3.194067  | 9.376222   |
| 6 | -4.104496 | -0.721062 | 9.376222   |
| 6 | -4.104496 | 0.721062  | 9.376222   |
| 6 | 1.427790  | 3.915129  | 9.376222   |
| 6 | 2.676706  | 3.194067  | 9.376222   |
| 6 | 1.427790  | -3.915129 | 9.376222   |
| 6 | 2.676706  | -3.194067 | 9.376222   |
| 6 | 4.104496  | 0.721062  | 9.376222   |
| 6 | 4.104496  | -0.721062 | 9.376222   |
| 6 | -1.427446 | -3.917199 | -10.629558 |
| 6 | -2.678671 | -3.194804 | -10.629558 |
| 6 | -1.427446 | 3.917199  | -10.629558 |
| 6 | -2.678671 | 3.194804  | -10.629558 |
| 6 | -4.106117 | -0.722395 | -10.629558 |
| 6 | -4.106117 | 0.722395  | -10.629558 |
| 6 | 1.427446  | 3.917199  | -10.629558 |
| 6 | 2.678671  | 3.194804  | -10.629558 |
| 6 | 1.427446  | -3.917199 | -10.629558 |

|   |           |           |            |
|---|-----------|-----------|------------|
| 6 | 2.678671  | -3.194804 | -10.629558 |
| 6 | 4.106117  | 0.722395  | -10.629558 |
| 6 | 4.106117  | -0.722395 | -10.629558 |
| 6 | 0.724575  | 4.108733  | -11.877328 |
| 6 | -0.724575 | 4.108733  | -11.877328 |
| 6 | -3.195979 | -2.681867 | -11.877328 |
| 6 | -3.920554 | -1.426866 | -11.877328 |
| 6 | -3.195979 | 2.681867  | -11.877328 |
| 6 | -3.920554 | 1.426866  | -11.877328 |
| 6 | -0.724575 | -4.108733 | -11.877328 |
| 6 | 0.724575  | -4.108733 | -11.877328 |
| 6 | 3.195979  | 2.681867  | -11.877328 |
| 6 | 3.920554  | 1.426866  | -11.877328 |
| 6 | 3.195979  | -2.681867 | -11.877328 |
| 6 | 3.920554  | -1.426866 | -11.877328 |
| 6 | -1.427711 | -3.915500 | -13.126735 |
| 6 | -2.677067 | -3.194184 | -13.126735 |
| 6 | -1.427711 | 3.915500  | -13.126735 |
| 6 | -2.677067 | 3.194184  | -13.126735 |
| 6 | -4.104777 | -0.721316 | -13.126735 |
| 6 | -4.104777 | 0.721316  | -13.126735 |
| 6 | 1.427711  | 3.915500  | -13.126735 |
| 6 | 2.677067  | 3.194184  | -13.126735 |
| 6 | 1.427711  | -3.915500 | -13.126735 |
| 6 | 2.677067  | -3.194184 | -13.126735 |
| 6 | 4.104777  | 0.721316  | -13.126735 |
| 6 | 4.104777  | -0.721316 | -13.126735 |
| 6 | 0.721902  | 4.105556  | -14.380433 |
| 6 | -0.721902 | 4.105556  | -14.380433 |
| 6 | -3.194565 | -2.677963 | -14.380433 |
| 6 | -3.916467 | -1.427592 | -14.380433 |
| 6 | -3.194565 | 2.677963  | -14.380433 |
| 6 | -3.916467 | 1.427592  | -14.380433 |
| 6 | -0.721902 | -4.105556 | -14.380433 |
| 6 | 0.721902  | -4.105556 | -14.380433 |
| 6 | 3.194565  | 2.677963  | -14.380433 |
| 6 | 3.916467  | 1.427592  | -14.380433 |
| 6 | 3.194565  | -2.677963 | -14.380433 |
| 6 | 3.916467  | -1.427592 | -14.380433 |
| 6 | -1.426807 | -3.920856 | -15.628701 |
| 6 | -2.682157 | -3.196079 | -15.628701 |
| 6 | -1.426807 | 3.920856  | -15.628701 |
| 6 | -2.682157 | 3.196079  | -15.628701 |
| 6 | -4.108964 | -0.724777 | -15.628701 |
| 6 | -4.108964 | 0.724777  | -15.628701 |
| 6 | 1.426807  | 3.920856  | -15.628701 |
| 6 | 2.682157  | 3.196079  | -15.628701 |
| 6 | 1.426807  | -3.920856 | -15.628701 |
| 6 | 2.682157  | -3.196079 | -15.628701 |
| 6 | 4.108964  | 0.724777  | -15.628701 |
| 6 | 4.108964  | -0.724777 | -15.628701 |
| 6 | 0.721637  | 4.105169  | -16.877263 |
| 6 | -0.721637 | 4.105169  | -16.877263 |
| 6 | -3.194362 | -2.677540 | -16.877263 |
| 6 | -3.915999 | -1.427628 | -16.877263 |
| 6 | -3.194362 | 2.677540  | -16.877263 |
| 6 | -3.915999 | 1.427628  | -16.877263 |
| 6 | -0.721637 | -4.105169 | -16.877263 |
| 6 | 0.721637  | -4.105169 | -16.877263 |
| 6 | 3.194362  | 2.677540  | -16.877263 |
| 6 | 3.915999  | 1.427628  | -16.877263 |
| 6 | 3.194362  | -2.677540 | -16.877263 |
| 6 | 3.915999  | -1.427628 | -16.877263 |
| 6 | -1.427723 | -3.915700 | -18.131212 |
| 6 | -2.677234 | -3.194294 | -18.131212 |
| 6 | -1.427723 | 3.915700  | -18.131212 |
| 6 | -2.677234 | 3.194294  | -18.131212 |
| 6 | -4.104957 | -0.721406 | -18.131212 |
| 6 | -4.104957 | 0.721406  | -18.131212 |
| 6 | 1.427723  | 3.915700  | -18.131212 |

|   |           |           |            |
|---|-----------|-----------|------------|
| 6 | 2.677234  | 3.194294  | -18.131212 |
| 6 | 1.427723  | -3.915700 | -18.131212 |
| 6 | 2.677234  | -3.194294 | -18.131212 |
| 6 | 4.104957  | 0.721406  | -18.131212 |
| 6 | 4.104957  | -0.721406 | -18.131212 |
| 6 | 0.724884  | 4.109128  | -19.380136 |
| 6 | -0.724884 | 4.109128  | -19.380136 |
| 6 | -3.196167 | -2.682332 | -19.380136 |
| 6 | -3.921051 | -1.426796 | -19.380136 |
| 6 | -3.196167 | 2.682332  | -19.380136 |
| 6 | -3.921051 | 1.426796  | -19.380136 |
| 6 | -0.724884 | -4.109128 | -19.380136 |
| 6 | 0.724884  | -4.109128 | -19.380136 |
| 6 | 3.196167  | 2.682332  | -19.380136 |
| 6 | 3.921051  | 1.426796  | -19.380136 |
| 6 | 3.196167  | -2.682332 | -19.380136 |
| 6 | 3.921051  | -1.426796 | -19.380136 |
| 6 | -1.427496 | -3.916635 | -20.627809 |
| 6 | -2.678158 | -3.194565 | -20.627809 |
| 6 | -1.427496 | 3.916635  | -20.627809 |
| 6 | -2.678158 | 3.194565  | -20.627809 |
| 6 | -4.105653 | -0.722070 | -20.627809 |
| 6 | -4.105653 | 0.722070  | -20.627809 |
| 6 | 1.427496  | 3.916635  | -20.627809 |
| 6 | 2.678158  | 3.194565  | -20.627809 |
| 6 | 1.427496  | -3.916635 | -20.627809 |
| 6 | 2.678158  | -3.194565 | -20.627809 |
| 6 | 4.105653  | 0.722070  | -20.627809 |
| 6 | 4.105653  | -0.722070 | -20.627809 |
| 6 | 0.720847  | 4.104312  | -21.881891 |
| 6 | -0.720847 | 4.104312  | -21.881891 |
| 6 | -3.194015 | -2.676428 | -21.881891 |
| 6 | -3.914862 | -1.427884 | -21.881891 |
| 6 | -3.194015 | 2.676428  | -21.881891 |
| 6 | -3.914862 | 1.427884  | -21.881891 |
| 6 | -0.720847 | -4.104312 | -21.881891 |
| 6 | 0.720847  | -4.104312 | -21.881891 |
| 6 | 3.194015  | 2.676428  | -21.881891 |
| 6 | 3.914862  | 1.427884  | -21.881891 |
| 6 | 3.194015  | -2.676428 | -21.881891 |
| 6 | 3.914862  | -1.427884 | -21.881891 |
| 6 | -1.426758 | -3.921141 | -23.131670 |
| 6 | -2.682429 | -3.196179 | -23.131670 |
| 6 | -1.426758 | 3.921141  | -23.131670 |
| 6 | -2.682429 | 3.196179  | -23.131670 |
| 6 | -4.109186 | -0.724962 | -23.131670 |
| 6 | -4.109186 | 0.724962  | -23.131670 |
| 6 | 1.426758  | 3.921141  | -23.131670 |
| 6 | 2.682429  | 3.196179  | -23.131670 |
| 6 | 1.426758  | -3.921141 | -23.131670 |
| 6 | 2.682429  | -3.196179 | -23.131670 |
| 6 | 4.109186  | 0.724962  | -23.131670 |
| 6 | 4.109186  | -0.724962 | -23.131670 |
| 6 | 0.722609  | 4.106250  | -24.378362 |
| 6 | -0.722609 | 4.106250  | -24.378362 |
| 6 | -3.194812 | -2.678923 | -24.378362 |
| 6 | -3.917421 | -1.427327 | -24.378362 |
| 6 | -3.194812 | 2.678923  | -24.378362 |
| 6 | -3.917421 | 1.427327  | -24.378362 |
| 6 | -0.722609 | -4.106250 | -24.378362 |
| 6 | 0.722609  | -4.106250 | -24.378362 |
| 6 | 3.194812  | 2.678923  | -24.378362 |
| 6 | 3.917421  | 1.427327  | -24.378362 |
| 6 | 3.194812  | -2.678923 | -24.378362 |
| 6 | 3.917421  | -1.427327 | -24.378362 |
| 6 | -1.428056 | -3.913877 | -25.632445 |
| 6 | -2.675489 | -3.193672 | -25.632445 |
| 6 | -1.428056 | 3.913877  | -25.632445 |
| 6 | -2.675489 | 3.193672  | -25.632445 |
| 6 | -4.103545 | -0.720205 | -25.632445 |

|   |           |           |            |
|---|-----------|-----------|------------|
| 6 | -4.103545 | 0.720205  | -25.632445 |
| 6 | 1.428056  | 3.913877  | -25.632445 |
| 6 | 2.675489  | 3.193672  | -25.632445 |
| 6 | 1.428056  | -3.913877 | -25.632445 |
| 6 | 2.675489  | -3.193672 | -25.632445 |
| 6 | 4.103545  | 0.720205  | -25.632445 |
| 6 | 4.103545  | -0.720205 | -25.632445 |
| 6 | 0.725003  | 4.109430  | -26.883439 |
| 6 | -0.725003 | 4.109430  | -26.883439 |
| 6 | -3.196369 | -2.682586 | -26.883439 |
| 6 | -3.921372 | -1.426844 | -26.883439 |
| 6 | -3.196369 | 2.682586  | -26.883439 |
| 6 | -3.921372 | 1.426844  | -26.883439 |
| 6 | -0.725003 | -4.109430 | -26.883439 |
| 6 | 0.725003  | -4.109430 | -26.883439 |
| 6 | 3.196369  | 2.682586  | -26.883439 |
| 6 | 3.921372  | 1.426844  | -26.883439 |
| 6 | 3.196369  | -2.682586 | -26.883439 |
| 6 | 3.921372  | -1.426844 | -26.883439 |
| 6 | -1.427309 | -3.919191 | -28.128880 |
| 6 | -2.680465 | -3.195681 | -28.128880 |
| 6 | -1.427309 | 3.919191  | -28.128880 |
| 6 | -2.680465 | 3.195681  | -28.128880 |
| 6 | -4.107774 | -0.723510 | -28.128880 |
| 6 | -4.107774 | 0.723510  | -28.128880 |
| 6 | 1.427309  | 3.919191  | -28.128880 |
| 6 | 2.680465  | 3.195681  | -28.128880 |
| 6 | 1.427309  | -3.919191 | -28.128880 |
| 6 | 2.680465  | -3.195681 | -28.128880 |
| 6 | 4.107774  | 0.723510  | -28.128880 |
| 6 | 4.107774  | -0.723510 | -28.128880 |
| 6 | 0.719245  | 4.103115  | -29.382641 |
| 6 | -0.719245 | 4.103115  | -29.382641 |
| 6 | -3.193779 | -2.674441 | -29.382641 |
| 6 | -3.913024 | -1.428673 | -29.382641 |
| 6 | -3.193779 | 2.674441  | -29.382641 |
| 6 | -3.913024 | 1.428673  | -29.382641 |
| 6 | -0.719245 | -4.103115 | -29.382641 |
| 6 | 0.719245  | -4.103115 | -29.382641 |
| 6 | 3.193779  | 2.674441  | -29.382641 |
| 6 | 3.913024  | 1.428673  | -29.382641 |
| 6 | 3.193779  | -2.674441 | -29.382641 |
| 6 | 3.913024  | -1.428673 | -29.382641 |
| 6 | -1.426474 | -3.920362 | -30.635655 |
| 6 | -2.681896 | -3.195543 | -30.635655 |
| 6 | -1.426474 | 3.920362  | -30.635655 |
| 6 | -2.681896 | 3.195543  | -30.635655 |
| 6 | -4.108370 | -0.724818 | -30.635655 |
| 6 | -4.108370 | 0.724818  | -30.635655 |
| 6 | 1.426474  | 3.920362  | -30.635655 |
| 6 | 2.681896  | 3.195543  | -30.635655 |
| 6 | 1.426474  | -3.920362 | -30.635655 |
| 6 | 2.681896  | -3.195543 | -30.635655 |
| 6 | 4.108370  | 0.724818  | -30.635655 |
| 6 | 4.108370  | -0.724818 | -30.635655 |
| 6 | 0.724141  | 4.103583  | -31.879037 |
| 6 | -0.724141 | 4.103583  | -31.879037 |
| 6 | -3.191736 | -2.678916 | -31.879037 |
| 6 | -3.915878 | -1.424667 | -31.879037 |
| 6 | -3.191736 | 2.678916  | -31.879037 |
| 6 | -3.915878 | 1.424667  | -31.879037 |
| 6 | -0.724141 | -4.103583 | -31.879037 |
| 6 | 0.724141  | -4.103583 | -31.879037 |
| 6 | 3.191736  | 2.678916  | -31.879037 |
| 6 | 3.915878  | 1.424667  | -31.879037 |
| 6 | 3.191736  | -2.678916 | -31.879037 |
| 6 | 3.915878  | -1.424667 | -31.879037 |
| 6 | -1.424174 | -3.897387 | -33.132344 |
| 6 | -2.663149 | -3.182064 | -33.132344 |
| 6 | -1.424174 | 3.897387  | -33.132344 |



|   |           |           |            |
|---|-----------|-----------|------------|
| 6 | -2.663149 | 3.182064  | -33.132344 |
| 6 | -4.087323 | -0.715322 | -33.132344 |
| 6 | -4.087323 | 0.715322  | -33.132344 |
| 6 | 1.424174  | 3.897387  | -33.132344 |
| 6 | 2.663149  | 3.182064  | -33.132344 |
| 6 | 1.424174  | -3.897387 | -33.132344 |
| 6 | 2.663149  | -3.182064 | -33.132344 |
| 6 | 4.087323  | 0.715322  | -33.132344 |
| 6 | 4.087323  | -0.715322 | -33.132344 |
| 6 | 0.725927  | 4.097922  | -34.393849 |
| 6 | -0.725927 | 4.097922  | -34.393849 |
| 6 | -3.185941 | -2.677632 | -34.393849 |
| 6 | -3.911868 | -1.420289 | -34.393849 |
| 6 | -3.185941 | 2.677632  | -34.393849 |
| 6 | -3.911868 | 1.420289  | -34.393849 |
| 6 | -0.725927 | -4.097922 | -34.393849 |
| 6 | 0.725927  | -4.097922 | -34.393849 |
| 6 | 3.185941  | 2.677632  | -34.393849 |
| 6 | 3.911868  | 1.420289  | -34.393849 |
| 6 | 3.185941  | -2.677632 | -34.393849 |
| 6 | 3.911868  | -1.420289 | -34.393849 |
| 6 | -1.437264 | -3.959672 | -35.634034 |
| 6 | -2.710545 | -3.224543 | -35.634034 |
| 6 | -1.437264 | 3.959672  | -35.634034 |
| 6 | -2.710545 | 3.224543  | -35.634034 |
| 6 | -4.147808 | -0.735129 | -35.634034 |
| 6 | -4.147808 | 0.735129  | -35.634034 |
| 6 | 1.437264  | 3.959672  | -35.634034 |
| 6 | 2.710545  | 3.224543  | -35.634034 |
| 6 | 1.437264  | -3.959672 | -35.634034 |
| 6 | 2.710545  | -3.224543 | -35.634034 |
| 6 | 4.147808  | 0.735129  | -35.634034 |
| 6 | 4.147808  | -0.735129 | -35.634034 |
| 6 | 0.692143  | 4.212474  | -36.849206 |
| 6 | -0.692143 | 4.212474  | -36.849206 |
| 6 | -3.302038 | -2.705651 | -36.849206 |
| 6 | -3.994181 | -1.506823 | -36.849206 |
| 6 | -3.302038 | 2.705651  | -36.849206 |
| 6 | -3.994181 | 1.506823  | -36.849206 |
| 6 | -0.692143 | -4.212474 | -36.849206 |
| 6 | 0.692143  | -4.212474 | -36.849206 |
| 6 | 3.302038  | 2.705651  | -36.849206 |
| 6 | 3.994181  | 1.506823  | -36.849206 |
| 6 | 3.302038  | -2.705651 | -36.849206 |
| 6 | 3.994181  | -1.506823 | -36.849206 |
| 1 | -1.226835 | -4.275431 | -37.805706 |
| 1 | -3.089215 | -3.200186 | -37.805706 |
| 1 | -1.226835 | 4.275431  | -37.805706 |
| 1 | -3.089215 | 3.200186  | -37.805706 |
| 1 | -4.316049 | -1.075246 | -37.805706 |
| 1 | -4.316049 | 1.075246  | -37.805706 |
| 1 | 1.226835  | 4.275431  | -37.805706 |
| 1 | 3.089215  | 3.200186  | -37.805706 |
| 1 | 1.226835  | -4.275431 | -37.805706 |
| 1 | 3.089215  | -3.200186 | -37.805706 |
| 1 | 4.316049  | 1.075246  | -37.805706 |
| 1 | 4.316049  | -1.075246 | -37.805706 |
| 6 | 0.722395  | 4.106117  | 10.629558  |
| 6 | -0.722395 | 4.106117  | 10.629558  |
| 6 | -3.194804 | -2.678671 | 10.629558  |
| 6 | -3.917199 | -1.427446 | 10.629558  |
| 6 | -3.194804 | 2.678671  | 10.629558  |
| 6 | -3.917199 | 1.427446  | 10.629558  |
| 6 | -0.722395 | -4.106117 | 10.629558  |
| 6 | 0.722395  | -4.106117 | 10.629558  |
| 6 | 3.194804  | 2.678671  | 10.629558  |
| 6 | 3.917199  | 1.427446  | 10.629558  |
| 6 | 3.194804  | -2.678671 | 10.629558  |
| 6 | 3.917199  | -1.427446 | 10.629558  |
| 6 | -1.426866 | -3.920554 | 11.877328  |

|   |           |           |           |
|---|-----------|-----------|-----------|
| 6 | -2.681867 | -3.195979 | 11.877328 |
| 6 | -1.426866 | 3.920554  | 11.877328 |
| 6 | -2.681867 | 3.195979  | 11.877328 |
| 6 | -4.108733 | -0.724575 | 11.877328 |
| 6 | -4.108733 | 0.724575  | 11.877328 |
| 6 | 1.426866  | 3.920554  | 11.877328 |
| 6 | 2.681867  | 3.195979  | 11.877328 |
| 6 | 1.426866  | -3.920554 | 11.877328 |
| 6 | 2.681867  | -3.195979 | 11.877328 |
| 6 | 4.108733  | 0.724575  | 11.877328 |
| 6 | 4.108733  | -0.724575 | 11.877328 |
| 6 | 0.721316  | 4.104777  | 13.126735 |
| 6 | -0.721316 | 4.104777  | 13.126735 |
| 6 | -3.194184 | -2.677067 | 13.126735 |
| 6 | -3.915500 | -1.427711 | 13.126735 |
| 6 | -3.194184 | 2.677067  | 13.126735 |
| 6 | -3.915500 | 1.427711  | 13.126735 |
| 6 | -0.721316 | -4.104777 | 13.126735 |
| 6 | 0.721316  | -4.104777 | 13.126735 |
| 6 | 3.194184  | 2.677067  | 13.126735 |
| 6 | 3.915500  | 1.427711  | 13.126735 |
| 6 | 3.194184  | -2.677067 | 13.126735 |
| 6 | 3.915500  | -1.427711 | 13.126735 |
| 6 | -1.427592 | -3.916467 | 14.380433 |
| 6 | -2.677963 | -3.194565 | 14.380433 |
| 6 | -1.427592 | 3.916467  | 14.380433 |
| 6 | -2.677963 | 3.194565  | 14.380433 |
| 6 | -4.105556 | -0.721902 | 14.380433 |
| 6 | -4.105556 | 0.721902  | 14.380433 |
| 6 | 1.427592  | 3.916467  | 14.380433 |
| 6 | 2.677963  | 3.194565  | 14.380433 |
| 6 | 1.427592  | -3.916467 | 14.380433 |
| 6 | 2.677963  | -3.194565 | 14.380433 |
| 6 | 4.105556  | 0.721902  | 14.380433 |
| 6 | 4.105556  | -0.721902 | 14.380433 |
| 6 | 0.724777  | 4.108964  | 15.628701 |
| 6 | -0.724777 | 4.108964  | 15.628701 |
| 6 | -3.196079 | -2.682157 | 15.628701 |
| 6 | -3.920856 | -1.426807 | 15.628701 |
| 6 | -3.196079 | 2.682157  | 15.628701 |
| 6 | -3.920856 | 1.426807  | 15.628701 |
| 6 | -0.724777 | -4.108964 | 15.628701 |
| 6 | 0.724777  | -4.108964 | 15.628701 |
| 6 | 3.196079  | 2.682157  | 15.628701 |
| 6 | 3.920856  | 1.426807  | 15.628701 |
| 6 | 3.196079  | -2.682157 | 15.628701 |
| 6 | 3.920856  | -1.426807 | 15.628701 |
| 6 | -1.427628 | -3.915999 | 16.877263 |
| 6 | -2.677540 | -3.194362 | 16.877263 |
| 6 | -1.427628 | 3.915999  | 16.877263 |
| 6 | -2.677540 | 3.194362  | 16.877263 |
| 6 | -4.105169 | -0.721637 | 16.877263 |
| 6 | -4.105169 | 0.721637  | 16.877263 |
| 6 | 1.427628  | 3.915999  | 16.877263 |
| 6 | 2.677540  | 3.194362  | 16.877263 |
| 6 | 1.427628  | -3.915999 | 16.877263 |
| 6 | 2.677540  | -3.194362 | 16.877263 |
| 6 | 4.105169  | 0.721637  | 16.877263 |
| 6 | 4.105169  | -0.721637 | 16.877263 |
| 6 | 0.721406  | 4.104957  | 18.131212 |
| 6 | -0.721406 | 4.104957  | 18.131212 |
| 6 | -3.194294 | -2.677234 | 18.131212 |
| 6 | -3.915700 | -1.427723 | 18.131212 |
| 6 | -3.194294 | 2.677234  | 18.131212 |
| 6 | -3.915700 | 1.427723  | 18.131212 |
| 6 | -0.721406 | -4.104957 | 18.131212 |
| 6 | 0.721406  | -4.104957 | 18.131212 |
| 6 | 3.194294  | 2.677234  | 18.131212 |
| 6 | 3.915700  | 1.427723  | 18.131212 |
| 6 | 3.194294  | -2.677234 | 18.131212 |

|   |           |           |           |
|---|-----------|-----------|-----------|
| 6 | 3.915700  | -1.427723 | 18.131212 |
| 6 | -1.426796 | -3.921051 | 19.380136 |
| 6 | -2.682332 | -3.196167 | 19.380136 |
| 6 | -1.426796 | 3.921051  | 19.380136 |
| 6 | -2.682332 | 3.196167  | 19.380136 |
| 6 | -4.109128 | -0.724884 | 19.380136 |
| 6 | -4.109128 | 0.724884  | 19.380136 |
| 6 | 1.426796  | 3.921051  | 19.380136 |
| 6 | 2.682332  | 3.196167  | 19.380136 |
| 6 | 1.426796  | -3.921051 | 19.380136 |
| 6 | 2.682332  | -3.196167 | 19.380136 |
| 6 | 4.109128  | 0.724884  | 19.380136 |
| 6 | 4.109128  | -0.724884 | 19.380136 |
| 6 | 0.722070  | 4.105653  | 20.627809 |
| 6 | -0.722070 | 4.105653  | 20.627809 |
| 6 | -3.194565 | -2.678158 | 20.627809 |
| 6 | -3.916635 | -1.427496 | 20.627809 |
| 6 | -3.194565 | 2.678158  | 20.627809 |
| 6 | -3.916635 | 1.427496  | 20.627809 |
| 6 | -0.722070 | -4.105653 | 20.627809 |
| 6 | 0.722070  | -4.105653 | 20.627809 |
| 6 | 3.194565  | 2.678158  | 20.627809 |
| 6 | 3.916635  | 1.427496  | 20.627809 |
| 6 | 3.194565  | -2.678158 | 20.627809 |
| 6 | 3.916635  | -1.427496 | 20.627809 |
| 6 | -1.427884 | -3.914862 | 21.881891 |
| 6 | -2.676428 | -3.194015 | 21.881891 |
| 6 | -1.427884 | 3.914862  | 21.881891 |
| 6 | -2.676428 | 3.194015  | 21.881891 |
| 6 | -4.104312 | -0.720847 | 21.881891 |
| 6 | -4.104312 | 0.720847  | 21.881891 |
| 6 | 1.427884  | 3.914862  | 21.881891 |
| 6 | 2.676428  | 3.194015  | 21.881891 |
| 6 | 1.427884  | -3.914862 | 21.881891 |
| 6 | 2.676428  | -3.194015 | 21.881891 |
| 6 | 4.104312  | 0.720847  | 21.881891 |
| 6 | 4.104312  | -0.720847 | 21.881891 |
| 6 | 0.724962  | 4.109186  | 23.131670 |
| 6 | -0.724962 | 4.109186  | 23.131670 |
| 6 | -3.196179 | -2.682429 | 23.131670 |
| 6 | -3.921141 | -1.426758 | 23.131670 |
| 6 | -3.196179 | 2.682429  | 23.131670 |
| 6 | -3.921141 | 1.426758  | 23.131670 |
| 6 | -0.724962 | -4.109186 | 23.131670 |
| 6 | 0.724962  | -4.109186 | 23.131670 |
| 6 | 3.196179  | 2.682429  | 23.131670 |
| 6 | 3.921141  | 1.426758  | 23.131670 |
| 6 | 3.196179  | -2.682429 | 23.131670 |
| 6 | 3.921141  | -1.426758 | 23.131670 |
| 6 | -1.427327 | -3.917421 | 24.378362 |
| 6 | -2.678923 | -3.194812 | 24.378362 |
| 6 | -1.427327 | 3.917421  | 24.378362 |
| 6 | -2.678923 | 3.194812  | 24.378362 |
| 6 | -4.106250 | -0.722609 | 24.378362 |
| 6 | -4.106250 | 0.722609  | 24.378362 |
| 6 | 1.427327  | 3.917421  | 24.378362 |
| 6 | 2.678923  | 3.194812  | 24.378362 |
| 6 | 1.427327  | -3.917421 | 24.378362 |
| 6 | 2.678923  | -3.194812 | 24.378362 |
| 6 | 4.106250  | 0.722609  | 24.378362 |
| 6 | 4.106250  | -0.722609 | 24.378362 |
| 6 | 0.720205  | 4.103545  | 25.632445 |
| 6 | -0.720205 | 4.103545  | 25.632445 |
| 6 | -3.193672 | -2.675489 | 25.632445 |
| 6 | -3.913877 | -1.428056 | 25.632445 |
| 6 | -3.193672 | 2.675489  | 25.632445 |
| 6 | -3.913877 | 1.428056  | 25.632445 |
| 6 | -0.720205 | -4.103545 | 25.632445 |
| 6 | 0.720205  | -4.103545 | 25.632445 |
| 6 | 3.193672  | 2.675489  | 25.632445 |

|   |           |           |           |
|---|-----------|-----------|-----------|
| 6 | 3.913877  | 1.428056  | 25.632445 |
| 6 | 3.193672  | -2.675489 | 25.632445 |
| 6 | 3.913877  | -1.428056 | 25.632445 |
| 6 | -1.426844 | -3.921372 | 26.883439 |
| 6 | -2.682586 | -3.196369 | 26.883439 |
| 6 | -1.426844 | 3.921372  | 26.883439 |
| 6 | -2.682586 | 3.196369  | 26.883439 |
| 6 | -4.109430 | -0.725003 | 26.883439 |
| 6 | -4.109430 | 0.725003  | 26.883439 |
| 6 | 1.426844  | 3.921372  | 26.883439 |
| 6 | 2.682586  | 3.196369  | 26.883439 |
| 6 | 1.426844  | -3.921372 | 26.883439 |
| 6 | 2.682586  | -3.196369 | 26.883439 |
| 6 | 4.109430  | 0.725003  | 26.883439 |
| 6 | 4.109430  | -0.725003 | 26.883439 |
| 6 | 0.723510  | 4.107774  | 28.128880 |
| 6 | -0.723510 | 4.107774  | 28.128880 |
| 6 | -3.195681 | -2.680465 | 28.128880 |
| 6 | -3.919191 | -1.427309 | 28.128880 |
| 6 | -3.195681 | 2.680465  | 28.128880 |
| 6 | -3.919191 | 1.427309  | 28.128880 |
| 6 | -0.723510 | -4.107774 | 28.128880 |
| 6 | 0.723510  | -4.107774 | 28.128880 |
| 6 | 3.195681  | 2.680465  | 28.128880 |
| 6 | 3.919191  | 1.427309  | 28.128880 |
| 6 | 3.195681  | -2.680465 | 28.128880 |
| 6 | 3.919191  | -1.427309 | 28.128880 |
| 6 | -1.428673 | -3.913024 | 29.382641 |
| 6 | -2.674441 | -3.193779 | 29.382641 |
| 6 | -1.428673 | 3.913024  | 29.382641 |
| 6 | -2.674441 | 3.193779  | 29.382641 |
| 6 | -4.103115 | -0.719245 | 29.382641 |
| 6 | -4.103115 | 0.719245  | 29.382641 |
| 6 | 1.428673  | 3.913024  | 29.382641 |
| 6 | 2.674441  | 3.193779  | 29.382641 |
| 6 | 1.428673  | -3.913024 | 29.382641 |
| 6 | 2.674441  | -3.193779 | 29.382641 |
| 6 | 4.103115  | 0.719245  | 29.382641 |
| 6 | 4.103115  | -0.719245 | 29.382641 |
| 6 | 0.724818  | 4.108370  | 30.635655 |
| 6 | -0.724818 | 4.108370  | 30.635655 |
| 6 | -3.195543 | -2.681896 | 30.635655 |
| 6 | -3.920362 | -1.426474 | 30.635655 |
| 6 | -3.195543 | 2.681896  | 30.635655 |
| 6 | -3.920362 | 1.426474  | 30.635655 |
| 6 | -0.724818 | -4.108370 | 30.635655 |
| 6 | 0.724818  | -4.108370 | 30.635655 |
| 6 | 3.195543  | 2.681896  | 30.635655 |
| 6 | 3.920362  | 1.426474  | 30.635655 |
| 6 | 3.195543  | -2.681896 | 30.635655 |
| 6 | 3.920362  | -1.426474 | 30.635655 |
| 6 | -1.424667 | -3.915878 | 31.879037 |
| 6 | -2.678916 | -3.191736 | 31.879037 |
| 6 | -1.424667 | 3.915878  | 31.879037 |
| 6 | -2.678916 | 3.191736  | 31.879037 |
| 6 | -4.103583 | -0.724141 | 31.879037 |
| 6 | -4.103583 | 0.724141  | 31.879037 |
| 6 | 1.424667  | 3.915878  | 31.879037 |
| 6 | 2.678916  | 3.191736  | 31.879037 |
| 6 | 1.424667  | -3.915878 | 31.879037 |
| 6 | 2.678916  | -3.191736 | 31.879037 |
| 6 | 4.103583  | 0.724141  | 31.879037 |
| 6 | 4.103583  | -0.724141 | 31.879037 |
| 6 | 0.715322  | 4.087323  | 33.132344 |
| 6 | -0.715322 | 4.087323  | 33.132344 |
| 6 | -3.182064 | -2.663149 | 33.132344 |
| 6 | -3.897387 | -1.424174 | 33.132344 |
| 6 | -3.182064 | 2.663149  | 33.132344 |
| 6 | -3.897387 | 1.424174  | 33.132344 |
| 6 | -0.715322 | -4.087323 | 33.132344 |

|   |           |           |           |
|---|-----------|-----------|-----------|
| 6 | 0.715322  | -4.087323 | 33.132344 |
| 6 | 3.182064  | 2.663149  | 33.132344 |
| 6 | 3.897387  | 1.424174  | 33.132344 |
| 6 | 3.182064  | -2.663149 | 33.132344 |
| 6 | 3.897387  | -1.424174 | 33.132344 |
| 6 | -1.420289 | -3.911868 | 34.393849 |
| 6 | -2.677632 | -3.185941 | 34.393849 |
| 6 | -1.420289 | 3.911868  | 34.393849 |
| 6 | -2.677632 | 3.185941  | 34.393849 |
| 6 | -4.097922 | -0.725927 | 34.393849 |
| 6 | -4.097922 | 0.725927  | 34.393849 |
| 6 | 1.420289  | 3.911868  | 34.393849 |
| 6 | 2.677632  | 3.185941  | 34.393849 |
| 6 | 1.420289  | -3.911868 | 34.393849 |
| 6 | 2.677632  | -3.185941 | 34.393849 |
| 6 | 4.097922  | 0.725927  | 34.393849 |
| 6 | 4.097922  | -0.725927 | 34.393849 |
| 6 | 0.735129  | 4.147808  | 35.634034 |
| 6 | -0.735129 | 4.147808  | 35.634034 |
| 6 | -3.224543 | -2.710545 | 35.634034 |
| 6 | -3.959672 | -1.437264 | 35.634034 |
| 6 | -3.224543 | 2.710545  | 35.634034 |
| 6 | -3.959672 | 1.437264  | 35.634034 |
| 6 | -0.735129 | -4.147808 | 35.634034 |
| 6 | 0.735129  | -4.147808 | 35.634034 |
| 6 | 3.224543  | 2.710545  | 35.634034 |
| 6 | 3.959672  | 1.437264  | 35.634034 |
| 6 | 3.224543  | -2.710545 | 35.634034 |
| 6 | 3.959672  | -1.437264 | 35.634034 |
| 6 | -1.506823 | -3.994181 | 36.849206 |
| 6 | -2.705651 | -3.302038 | 36.849206 |
| 6 | -1.506823 | 3.994181  | 36.849206 |
| 6 | -2.705651 | 3.302038  | 36.849206 |
| 6 | -4.212474 | -0.692143 | 36.849206 |
| 6 | -4.212474 | 0.692143  | 36.849206 |
| 6 | 1.506823  | 3.994181  | 36.849206 |
| 6 | 2.705651  | 3.302038  | 36.849206 |
| 6 | 1.506823  | -3.994181 | 36.849206 |
| 6 | 2.705651  | -3.302038 | 36.849206 |
| 6 | 4.212474  | 0.692143  | 36.849206 |
| 6 | 4.212474  | -0.692143 | 36.849206 |
| 1 | 1.075246  | 4.316049  | 37.805706 |
| 1 | -1.075246 | 4.316049  | 37.805706 |
| 1 | -3.200186 | -3.089215 | 37.805706 |
| 1 | -4.275431 | -1.226835 | 37.805706 |
| 1 | -3.200186 | 3.089215  | 37.805706 |
| 1 | -4.275431 | 1.226835  | 37.805706 |
| 1 | -1.075246 | -4.316049 | 37.805706 |
| 1 | 1.075246  | -4.316049 | 37.805706 |
| 1 | 3.200186  | 3.089215  | 37.805706 |
| 1 | 4.275431  | 1.226835  | 37.805706 |
| 1 | 3.200186  | -3.089215 | 37.805706 |
| 1 | 4.275431  | -1.226835 | 37.805706 |

Nanotube (6,6) u30v6s  
B3LYP/STO-3G Energy: -27572.294920

|   |             |             |             |
|---|-------------|-------------|-------------|
| C | 1.76092111  | 3.89288572  | 37.45598347 |
| C | 0.42144045  | 4.25179848  | 37.45598347 |
| C | -2.49087737 | 3.47144527  | 37.45598347 |
| C | -3.47144527 | 2.49087737  | 37.45598347 |
| C | -4.25179848 | -0.42144045 | 37.45598347 |
| C | -3.89288572 | -1.76092111 | 37.45598347 |
| C | -1.76092111 | -3.89288572 | 37.45598347 |
| C | -0.42144045 | -4.25179848 | 37.45598347 |
| C | 2.49087737  | -3.47144527 | 37.45598347 |
| C | 3.47144527  | -2.49087737 | 37.45598347 |
| C | 4.25179848  | 0.42144045  | 37.45598347 |

|   |             |             |             |
|---|-------------|-------------|-------------|
| C | 3.89288572  | 1.76092111  | 37.45598347 |
| C | -0.36246741 | 4.20048225  | 36.24345976 |
| C | -1.78633514 | 3.81895804  | 36.24345976 |
| C | -3.81895804 | 1.78633514  | 36.24345976 |
| C | -4.20048225 | 0.36246741  | 36.24345976 |
| C | -3.45649063 | -2.41414711 | 36.24345976 |
| C | -2.41414711 | -3.45649063 | 36.24345976 |
| C | 0.36246741  | -4.20048225 | 36.24345976 |
| C | 1.78633514  | -3.81895804 | 36.24345976 |
| C | 3.81895804  | -1.78633514 | 36.24345976 |
| C | 4.20048225  | -0.36246741 | 36.24345976 |
| C | 3.45649063  | 2.41414711  | 36.24345976 |
| C | 2.41414711  | 3.45649063  | 36.24345976 |
| C | -2.38456794 | 3.41048871  | 35.00324228 |
| C | -3.41048871 | 2.38456794  | 35.00324228 |
| C | -4.14585383 | -0.35985205 | 35.00324228 |
| C | -3.77034076 | -1.76128589 | 35.00324228 |
| C | -1.76128589 | -3.77034076 | 35.00324228 |
| C | -0.35985205 | -4.14585383 | 35.00324228 |
| C | 2.38456794  | -3.41048871 | 35.00324228 |
| C | 3.41048871  | -2.38456794 | 35.00324228 |
| C | 4.14585383  | 0.35985205  | 35.00324228 |
| C | 3.77034076  | 1.76128589  | 35.00324228 |
| C | 1.76128589  | 3.77034076  | 35.00324228 |
| C | 0.35985205  | 4.14585383  | 35.00324228 |
| C | -3.76450383 | 1.75027309  | 33.74036813 |
| C | -4.13529249 | 0.36647095  | 33.74036813 |
| C | -3.39803288 | -2.38501940 | 33.74036813 |
| C | -2.38501940 | -3.39803288 | 33.74036813 |
| C | 0.36647095  | -4.13529249 | 33.74036813 |
| C | 1.75027309  | -3.76450383 | 33.74036813 |
| C | 3.76450383  | -1.75027309 | 33.74036813 |
| C | 4.13529249  | -0.36647095 | 33.74036813 |
| C | 3.39803288  | 2.38501940  | 33.74036813 |
| C | 2.38501940  | 3.39803288  | 33.74036813 |
| C | -0.36647095 | 4.13529249  | 33.74036813 |
| C | -1.75027309 | 3.76450383  | 33.74036813 |
| C | -4.15461435 | -0.36159047 | 32.48978695 |
| C | -3.77879681 | -1.76416065 | 32.48978695 |
| C | -1.76416065 | -3.77879681 | 32.48978695 |
| C | -0.36159047 | -4.15461435 | 32.48978695 |
| C | 2.39045371  | -3.41720634 | 32.48978695 |
| C | 3.41720634  | -2.39045371 | 32.48978695 |
| C | 4.15461435  | 0.36159047  | 32.48978695 |
| C | 3.77879681  | 1.76416065  | 32.48978695 |
| C | 1.76416065  | 3.77879681  | 32.48978695 |
| C | 0.36159047  | 4.15461435  | 32.48978695 |
| C | -2.39045371 | 3.41720634  | 32.48978695 |
| C | -3.41720634 | 2.39045371  | 32.48978695 |
| C | -3.41689165 | -2.39282881 | 31.24664853 |
| C | -2.39282881 | -3.41689165 | 31.24664853 |
| C | 0.36380471  | -4.15552938 | 31.24664853 |
| C | 1.76270057  | -3.78069636 | 31.24664853 |
| C | 3.78069636  | -1.76270057 | 31.24664853 |
| C | 4.15552938  | -0.36380471 | 31.24664853 |
| C | 3.41689165  | 2.39282881  | 31.24664853 |
| C | 2.39282881  | 3.41689165  | 31.24664853 |
| C | -0.36380471 | 4.15552938  | 31.24664853 |
| C | -1.76270057 | 3.78069636  | 31.24664853 |
| C | -3.78069636 | 1.76270057  | 31.24664853 |
| C | -4.15552938 | 0.36380471  | 31.24664853 |
| C | -1.75791212 | -3.77853416 | 29.99171401 |
| C | -0.36687052 | -4.15126263 | 29.99171401 |
| C | 2.39335051  | -3.41166364 | 29.99171401 |
| C | 3.41166364  | -2.39335051 | 29.99171401 |
| C | 4.15126263  | 0.36687052  | 29.99171401 |
| C | 3.77853416  | 1.75791212  | 29.99171401 |
| C | 1.75791212  | 3.77853416  | 29.99171401 |
| C | 0.36687052  | 4.15126263  | 29.99171401 |
| C | -2.39335051 | 3.41166364  | 29.99171401 |

|   |             |             |             |
|---|-------------|-------------|-------------|
| C | -3.41166364 | 2.39335051  | 29.99171401 |
| C | -4.15126263 | -0.36687052 | 29.99171401 |
| C | -3.77853416 | -1.75791212 | 29.99171401 |
| C | 0.36308464  | -4.15914061 | 28.74097359 |
| C | 1.76512978  | -3.78346375 | 28.74097359 |
| C | 3.78346375  | -1.76512978 | 28.74097359 |
| C | 4.15914061  | -0.36308464 | 28.74097359 |
| C | 3.42037910  | 2.39401083  | 28.74097359 |
| C | 2.39401083  | 3.42037910  | 28.74097359 |
| C | -0.36308464 | 4.15914061  | 28.74097359 |
| C | -1.76512978 | 3.78346375  | 28.74097359 |
| C | -3.78346375 | 1.76512978  | 28.74097359 |
| C | -4.15914061 | 0.36308464  | 28.74097359 |
| C | -3.42037910 | -2.39401083 | 28.74097359 |
| C | -2.39401083 | -3.42037910 | 28.74097359 |
| C | 2.39355832  | -3.41788104 | 27.49626536 |
| C | 3.41788104  | -2.39355832 | 27.49626536 |
| C | 4.15675097  | 0.36394179  | 27.49626536 |
| C | 3.78182283  | 1.76319264  | 27.49626536 |
| C | 1.76319264  | 3.78182283  | 27.49626536 |
| C | 0.36394179  | 4.15675097  | 27.49626536 |
| C | -2.39355832 | 3.41788104  | 27.49626536 |
| C | -3.41788104 | 2.39355832  | 27.49626536 |
| C | -4.15675097 | -0.36394179 | 27.49626536 |
| C | -3.78182283 | -1.76319264 | 27.49626536 |
| C | -1.76319264 | -3.78182283 | 27.49626536 |
| C | -0.36394179 | -4.15675097 | 27.49626536 |
| C | 3.77857504  | -1.75869451 | 26.24308767 |
| C | 4.15168923  | -0.36621340 | 26.24308767 |
| C | 3.41236164  | 2.39299472  | 26.24308767 |
| C | 2.39299472  | 3.41236164  | 26.24308767 |
| C | -0.36621340 | 4.15168923  | 26.24308767 |
| C | -1.75869451 | 3.77857504  | 26.24308767 |
| C | -3.77857504 | 1.75869451  | 26.24308767 |
| C | -4.15168923 | 0.36621340  | 26.24308767 |
| C | -3.41236164 | -2.39299472 | 26.24308767 |
| C | -2.39299472 | -3.41236164 | 26.24308767 |
| C | 0.36621340  | -4.15168923 | 26.24308767 |
| C | 1.75869451  | -3.77857504 | 26.24308767 |
| C | 4.15783880  | 0.36334205  | 24.99212149 |
| C | 3.78246505  | 1.76425595  | 24.99212149 |
| C | 1.76425595  | 3.78246505  | 24.99212149 |
| C | 0.36334205  | 4.15783880  | 24.99212149 |
| C | -2.39358285 | 3.41912300  | 24.99212149 |
| C | -3.41912300 | 2.39358285  | 24.99212149 |
| C | -4.15783880 | -0.36334205 | 24.99212149 |
| C | -3.78246505 | -1.76425595 | 24.99212149 |
| C | -1.76425595 | -3.78246505 | 24.99212149 |
| C | -0.36334205 | -4.15783880 | 24.99212149 |
| C | 2.39358285  | -3.41912300 | 24.99212149 |
| C | 3.41912300  | -2.39358285 | 24.99212149 |
| C | 3.41772309  | 2.39350414  | 23.74687287 |
| C | 2.39350414  | 3.41772309  | 23.74687287 |
| C | -0.36397384 | 4.15658709  | 23.74687287 |
| C | -1.76308295 | 3.78169694  | 23.74687287 |
| C | -3.78169694 | 1.76308295  | 23.74687287 |
| C | -4.15658709 | 0.36397384  | 23.74687287 |
| C | -3.41772309 | -2.39350414 | 23.74687287 |
| C | -2.39350414 | -3.41772309 | 23.74687287 |
| C | 0.36397384  | -4.15658709 | 23.74687287 |
| C | 1.76308295  | -3.78169694 | 23.74687287 |
| C | 3.78169694  | -1.76308295 | 23.74687287 |
| C | 4.15658709  | -0.36397384 | 23.74687287 |
| C | 1.75907951  | 3.77882784  | 22.49444568 |
| C | 0.36600638  | 4.15210066  | 22.49444568 |
| C | -2.39302115 | 3.41282146  | 22.49444568 |
| C | -3.41282146 | 2.39302115  | 22.49444568 |
| C | -4.15210066 | -0.36600638 | 22.49444568 |
| C | -3.77882784 | -1.75907951 | 22.49444568 |
| C | -1.75907951 | -3.77882784 | 22.49444568 |

|   |             |             |             |
|---|-------------|-------------|-------------|
| C | -0.36600638 | -4.15210066 | 22.49444568 |
| C | 2.39302115  | -3.41282146 | 22.49444568 |
| C | 3.41282146  | -2.39302115 | 22.49444568 |
| C | 4.15210066  | 0.36600638  | 22.49444568 |
| C | 3.77882784  | 1.75907951  | 22.49444568 |
| C | -0.36350927 | 4.15735453  | 21.24359641 |
| C | -1.76386900 | 3.78212927  | 21.24359641 |
| C | -3.78212927 | 1.76386900  | 21.24359641 |
| C | -4.15735453 | 0.36350927  | 21.24359641 |
| C | -3.41862000 | -2.39348553 | 21.24359641 |
| C | -2.39348553 | -3.41862000 | 21.24359641 |
| C | 0.36350927  | -4.15735453 | 21.24359641 |
| C | 1.76386900  | -3.78212927 | 21.24359641 |
| C | 3.78212927  | -1.76386900 | 21.24359641 |
| C | 4.15735453  | -0.36350927 | 21.24359641 |
| C | 3.41862000  | 2.39348553  | 21.24359641 |
| C | 2.39348553  | 3.41862000  | 21.24359641 |
| C | -2.39356597 | 3.41777192  | 19.99801470 |
| C | -3.41777192 | 2.39356597  | 19.99801470 |
| C | -4.15666029 | -0.36400298 | 19.99801470 |
| C | -3.78177490 | -1.76309432 | 19.99801470 |
| C | -1.76309432 | -3.78177490 | 19.99801470 |
| C | -0.36400298 | -4.15666029 | 19.99801470 |
| C | 2.39356597  | -3.41777192 | 19.99801470 |
| C | 3.41777192  | -2.39356597 | 19.99801470 |
| C | 4.15666029  | 0.36400298  | 19.99801470 |
| C | 3.78177490  | 1.76309432  | 19.99801470 |
| C | 1.76309432  | 3.78177490  | 19.99801470 |
| C | 0.36400298  | 4.15666029  | 19.99801470 |
| C | -3.77919951 | 1.75945729  | 18.74606777 |
| C | -4.15261142 | 0.36586504  | 18.74606777 |
| C | -3.41333446 | -2.39315413 | 18.74606777 |
| C | -2.39315413 | -3.41333446 | 18.74606777 |
| C | 0.36586504  | -4.15261142 | 18.74606777 |
| C | 1.75945729  | -3.77919951 | 18.74606777 |
| C | 3.77919951  | -1.75945729 | 18.74606777 |
| C | 4.15261142  | -0.36586504 | 18.74606777 |
| C | 3.41333446  | 2.39315413  | 18.74606777 |
| C | 2.39315413  | 3.41333446  | 18.74606777 |
| C | -0.36586504 | 4.15261142  | 18.74606777 |
| C | -1.75945729 | 3.77919951  | 18.74606777 |
| C | -4.15724893 | -0.36362126 | 17.49535203 |
| C | -3.78209381 | -1.76371921 | 17.49535203 |
| C | -1.76371921 | -3.78209381 | 17.49535203 |
| C | -0.36362126 | -4.15724893 | 17.49535203 |
| C | 2.39352971  | -3.41847255 | 17.49535203 |
| C | 3.41847255  | -2.39352971 | 17.49535203 |
| C | 4.15724893  | 0.36362126  | 17.49535203 |
| C | 3.78209381  | 1.76371921  | 17.49535203 |
| C | 1.76371921  | 3.78209381  | 17.49535203 |
| C | 0.36362126  | 4.15724893  | 17.49535203 |
| C | -2.39352971 | 3.41847255  | 17.49535203 |
| C | -3.41847255 | 2.39352971  | 17.49535203 |
| C | -3.41773348 | -2.39359243 | 16.24934544 |
| C | -2.39359243 | -3.41773348 | 16.24934544 |
| C | 0.36404511  | -4.15664024 | 16.24934544 |
| C | 1.76304781  | -3.78177859 | 16.24934544 |
| C | 3.78177859  | -1.76304781 | 16.24934544 |
| C | 4.15664024  | -0.36404511 | 16.24934544 |
| C | 3.41773348  | 2.39359243  | 16.24934544 |
| C | 2.39359243  | 3.41773348  | 16.24934544 |
| C | -0.36404511 | 4.15664024  | 16.24934544 |
| C | -1.76304781 | 3.78177859  | 16.24934544 |
| C | -3.78177859 | 1.76304781  | 16.24934544 |
| C | -4.15664024 | 0.36404511  | 16.24934544 |
| C | -1.75960755 | -3.77949623 | 14.99758871 |
| C | -0.36588327 | -4.15294353 | 14.99758871 |
| C | 2.39333598  | -3.41361296 | 14.99758871 |
| C | 3.41361296  | -2.39333598 | 14.99758871 |
| C | 4.15294353  | 0.36588327  | 14.99758871 |



|   |             |             |             |
|---|-------------|-------------|-------------|
| C | 3.77949623  | 1.75960755  | 14.99758871 |
| C | 1.75960755  | 3.77949623  | 14.99758871 |
| C | 0.36588327  | 4.15294353  | 14.99758871 |
| C | -2.39333598 | 3.41361296  | 14.99758871 |
| C | -3.41361296 | 2.39333598  | 14.99758871 |
| C | -4.15294353 | -0.36588327 | 14.99758871 |
| C | -3.77949623 | -1.75960755 | 14.99758871 |
| C | 0.36382450  | -4.15720508 | 13.74667356 |
| C | 1.76352128  | -3.78215746 | 13.74667356 |
| C | 3.78215746  | -1.76352128 | 13.74667356 |
| C | 4.15720508  | -0.36382450 | 13.74667356 |
| C | 3.41833296  | 2.39368380  | 13.74667356 |
| C | 2.39368380  | 3.41833296  | 13.74667356 |
| C | -0.36382450 | 4.15720508  | 13.74667356 |
| C | -1.76352128 | 3.78215746  | 13.74667356 |
| C | -3.78215746 | 1.76352128  | 13.74667356 |
| C | -4.15720508 | 0.36382450  | 13.74667356 |
| C | -3.41833296 | -2.39368380 | 13.74667356 |
| C | -2.39368380 | -3.41833296 | 13.74667356 |
| C | 2.39337302  | -3.41749617 | 12.50034582 |
| C | 3.41749617  | -2.39337302 | 12.50034582 |
| C | 4.15632501  | 0.36397375  | 12.50034582 |
| C | 3.78146992  | 1.76295199  | 12.50034582 |
| C | 1.76295199  | 3.78146992  | 12.50034582 |
| C | 0.36397375  | 4.15632501  | 12.50034582 |
| C | -2.39337302 | 3.41749617  | 12.50034582 |
| C | -3.41749617 | 2.39337302  | 12.50034582 |
| C | -4.15632501 | -0.36397375 | 12.50034582 |
| C | -3.78146992 | -1.76295199 | 12.50034582 |
| C | -1.76295199 | -3.78146992 | 12.50034582 |
| C | -0.36397375 | -4.15632501 | 12.50034582 |
| C | 3.77914656  | -1.75965096 | 11.24853551 |
| C | 4.15266241  | -0.36567085 | 11.24853551 |
| C | 3.41347571  | 2.39301145  | 11.24853551 |
| C | 2.39301145  | 3.41347571  | 11.24853551 |
| C | -0.36567085 | 4.15266241  | 11.24853551 |
| C | -1.75965096 | 3.77914656  | 11.24853551 |
| C | -3.77914656 | 1.75965096  | 11.24853551 |
| C | -4.15266241 | 0.36567085  | 11.24853551 |
| C | -3.41347571 | -2.39301145 | 11.24853551 |
| C | -2.39301145 | -3.41347571 | 11.24853551 |
| C | 0.36567085  | -4.15266241 | 11.24853551 |
| C | 1.75965096  | -3.77914656 | 11.24853551 |
| C | 4.15708224  | 0.36379690  | 9.99736094  |
| C | 3.78203727  | 1.76348376  | 9.99736094  |
| C | 1.76348376  | 3.78203727  | 9.99736094  |
| C | 0.36379690  | 4.15708224  | 9.99736094  |
| C | -2.39359847 | 3.41824038  | 9.99736094  |
| C | -3.41824038 | 2.39359847  | 9.99736094  |
| C | -4.15708224 | -0.36379690 | 9.99736094  |
| C | -3.78203727 | -1.76348376 | 9.99736094  |
| C | -1.76348376 | -3.78203727 | 9.99736094  |
| C | -0.36379690 | -4.15708224 | 9.99736094  |
| C | 2.39359847  | -3.41824038 | 9.99736094  |
| C | 3.41824038  | -2.39359847 | 9.99736094  |
| C | 3.41757949  | 2.39336661  | 8.75085730  |
| C | 2.39336661  | 3.41757949  | 8.75085730  |
| C | -0.36392654 | 4.15639397  | 8.75085730  |
| C | -1.76302736 | 3.78150604  | 8.75085730  |
| C | -3.78150604 | 1.76302736  | 8.75085730  |
| C | -4.15639397 | 0.36392654  | 8.75085730  |
| C | -3.41757949 | -2.39336661 | 8.75085730  |
| C | -2.39336661 | -3.41757949 | 8.75085730  |
| C | 0.36392654  | -4.15639397 | 8.75085730  |
| C | 1.76302736  | -3.78150604 | 8.75085730  |
| C | 3.78150604  | -1.76302736 | 8.75085730  |
| C | 4.15639397  | -0.36392654 | 8.75085730  |
| C | 1.75947119  | 3.77878799  | 7.49912778  |
| C | 0.36564725  | 4.15226199  | 7.49912778  |
| C | -2.39279080 | 3.41314074  | 7.49912778  |

|   |             |             |            |
|---|-------------|-------------|------------|
| C | -3.41314074 | 2.39279080  | 7.49912778 |
| C | -4.15226199 | -0.36564725 | 7.49912778 |
| C | -3.77878799 | -1.75947119 | 7.49912778 |
| C | -1.75947119 | -3.77878799 | 7.49912778 |
| C | -0.36564725 | -4.15226199 | 7.49912778 |
| C | 2.39279080  | -3.41314074 | 7.49912778 |
| C | 3.41314074  | -2.39279080 | 7.49912778 |
| C | 4.15226199  | 0.36564725  | 7.49912778 |
| C | 3.77878799  | 1.75947119  | 7.49912778 |
| C | -0.36377998 | 4.15629496  | 6.24774405 |
| C | -1.76310477 | 3.78134701  | 6.24774405 |
| C | -3.78134701 | 1.76310477  | 6.24774405 |
| C | -4.15629496 | 0.36377998  | 6.24774405 |
| C | -3.41756703 | -2.39319019 | 6.24774405 |
| C | -2.39319019 | -3.41756703 | 6.24774405 |
| C | 0.36377998  | -4.15629496 | 6.24774405 |
| C | 1.76310477  | -3.78134701 | 6.24774405 |
| C | 3.78134701  | -1.76310477 | 6.24774405 |
| C | 4.15629496  | -0.36377998 | 6.24774405 |
| C | 3.41756703  | 2.39319019  | 6.24774405 |
| C | 2.39319019  | 3.41756703  | 6.24774405 |
| C | -2.39311955 | 3.41734763  | 5.00109295 |
| C | -3.41734763 | 2.39311955  | 5.00109295 |
| C | -4.15606964 | -0.36382851 | 5.00109295 |
| C | -3.78117614 | -1.76295008 | 5.00109295 |
| C | -1.76295008 | -3.78117614 | 5.00109295 |
| C | -0.36382851 | -4.15606964 | 5.00109295 |
| C | 2.39311955  | -3.41734763 | 5.00109295 |
| C | 3.41734763  | -2.39311955 | 5.00109295 |
| C | 4.15606964  | 0.36382851  | 5.00109295 |
| C | 3.78117614  | 1.76295008  | 5.00109295 |
| C | 1.76295008  | 3.78117614  | 5.00109295 |
| C | 0.36382851  | 4.15606964  | 5.00109295 |
| C | -3.77859989 | 1.75949587  | 3.74953370 |
| C | -4.15211143 | 0.36553183  | 3.74953370 |
| C | -3.41306806 | -2.39261556 | 3.74953370 |
| C | -2.39261556 | -3.41306806 | 3.74953370 |
| C | 0.36553183  | -4.15211143 | 3.74953370 |
| C | 1.75949587  | -3.77859989 | 3.74953370 |
| C | 3.77859989  | -1.75949587 | 3.74953370 |
| C | 4.15211143  | -0.36553183 | 3.74953370 |
| C | 3.41306806  | 2.39261556  | 3.74953370 |
| C | 2.39261556  | 3.41306806  | 3.74953370 |
| C | -0.36553183 | 4.15211143  | 3.74953370 |
| C | -1.75949587 | 3.77859989  | 3.74953370 |
| C | -4.15586972 | -0.36373077 | 2.49818194 |
| C | -3.78095414 | -1.76293477 | 2.49818194 |
| C | -1.76293477 | -3.78095414 | 2.49818194 |
| C | -0.36373077 | -4.15586972 | 2.49818194 |
| C | 2.39293495  | -3.41722337 | 2.49818194 |
| C | 3.41722337  | -2.39293495 | 2.49818194 |
| C | 4.15586972  | 0.36373077  | 2.49818194 |
| C | 3.78095414  | 1.76293477  | 2.49818194 |
| C | 1.76293477  | 3.78095414  | 2.49818194 |
| C | 0.36373077  | 4.15586972  | 2.49818194 |
| C | -2.39293495 | 3.41722337  | 2.49818194 |
| C | -3.41722337 | 2.39293495  | 2.49818194 |
| C | -3.41712043 | -2.39292342 | 1.25148746 |
| C | -2.39292342 | -3.41712043 | 1.25148746 |
| C | 0.36377226  | -4.15577481 | 1.25148746 |
| C | 1.76285139  | -3.78089269 | 1.25148746 |
| C | 3.78089269  | -1.76285139 | 1.25148746 |
| C | 4.15577481  | -0.36377226 | 1.25148746 |
| C | 3.41712043  | 2.39292342  | 1.25148746 |
| C | 2.39292342  | 3.41712043  | 1.25148746 |
| C | -0.36377226 | 4.15577481  | 1.25148746 |
| C | -1.76285139 | 3.78089269  | 1.25148746 |
| C | -3.78089269 | 1.76285139  | 1.25148746 |
| C | -4.15577481 | 0.36377226  | 1.25148746 |
| C | -1.75940227 | -3.77848007 | 0.00000000 |

|   |             |             |             |
|---|-------------|-------------|-------------|
| C | -0.36555297 | -4.15196086 | 0.00000000  |
| C | 2.39255859  | -3.41292710 | 0.00000000  |
| C | 3.41292710  | -2.39255859 | 0.00000000  |
| C | 4.15196086  | 0.36555297  | 0.00000000  |
| C | 3.77848007  | 1.75940227  | 0.00000000  |
| C | 1.75940227  | 3.77848007  | 0.00000000  |
| C | 0.36555297  | 4.15196086  | 0.00000000  |
| C | -2.39255859 | 3.41292710  | 0.00000000  |
| C | -3.41292710 | 2.39255859  | 0.00000000  |
| C | -4.15196086 | -0.36555297 | 0.00000000  |
| C | -3.77848007 | -1.75940227 | 0.00000000  |
| C | 0.36377226  | -4.15577481 | -1.25148746 |
| C | 1.76285139  | -3.78089269 | -1.25148746 |
| C | 3.78089269  | -1.76285139 | -1.25148746 |
| C | 4.15577481  | -0.36377226 | -1.25148746 |
| C | 3.41712043  | 2.39292342  | -1.25148746 |
| C | 2.39292342  | 3.41712043  | -1.25148746 |
| C | -0.36377226 | 4.15577481  | -1.25148746 |
| C | -1.76285139 | 3.78089269  | -1.25148746 |
| C | -3.78089269 | 1.76285139  | -1.25148746 |
| C | -4.15577481 | 0.36377226  | -1.25148746 |
| C | -3.41712043 | -2.39292342 | -1.25148746 |
| C | -2.39292342 | -3.41712043 | -1.25148746 |
| C | 2.39293495  | -3.41722337 | -2.49818194 |
| C | 3.41722337  | -2.39293495 | -2.49818194 |
| C | 4.15586972  | 0.36373077  | -2.49818194 |
| C | 3.78095414  | 1.76293477  | -2.49818194 |
| C | 1.76293477  | 3.78095414  | -2.49818194 |
| C | 0.36373077  | 4.15586972  | -2.49818194 |
| C | -2.39293495 | 3.41722337  | -2.49818194 |
| C | -3.41722337 | 2.39293495  | -2.49818194 |
| C | -4.15586972 | -0.36373077 | -2.49818194 |
| C | -3.78095414 | -1.76293477 | -2.49818194 |
| C | -1.76293477 | -3.78095414 | -2.49818194 |
| C | -0.36373077 | -4.15586972 | -2.49818194 |
| C | 3.77859989  | -1.75949587 | -3.74953370 |
| C | 4.15211143  | -0.36553183 | -3.74953370 |
| C | 3.41306806  | 2.39261556  | -3.74953370 |
| C | 2.39261556  | 3.41306806  | -3.74953370 |
| C | -0.36553183 | 4.15211143  | -3.74953370 |
| C | -1.75949587 | 3.77859989  | -3.74953370 |
| C | -3.77859989 | 1.75949587  | -3.74953370 |
| C | -4.15211143 | 0.36553183  | -3.74953370 |
| C | -3.41306806 | -2.39261556 | -3.74953370 |
| C | -2.39261556 | -3.41306806 | -3.74953370 |
| C | 0.36553183  | -4.15211143 | -3.74953370 |
| C | 1.75949587  | -3.77859989 | -3.74953370 |
| C | 4.15606964  | 0.36382851  | -5.00109295 |
| C | 3.78117614  | 1.76295008  | -5.00109295 |
| C | 1.76295008  | 3.78117614  | -5.00109295 |
| C | 0.36382851  | 4.15606964  | -5.00109295 |
| C | -2.39311955 | 3.41734763  | -5.00109295 |
| C | -3.41734763 | 2.39311955  | -5.00109295 |
| C | -4.15606964 | -0.36382851 | -5.00109295 |
| C | -3.78117614 | -1.76295008 | -5.00109295 |
| C | -1.76295008 | -3.78117614 | -5.00109295 |
| C | -0.36382851 | -4.15606964 | -5.00109295 |
| C | 2.39311955  | -3.41734763 | -5.00109295 |
| C | 3.41734763  | -2.39311955 | -5.00109295 |
| C | 3.41756703  | 2.39319019  | -6.24774405 |
| C | 2.39319019  | 3.41756703  | -6.24774405 |
| C | -0.36377998 | 4.15629496  | -6.24774405 |
| C | -1.76310477 | 3.78134701  | -6.24774405 |
| C | -3.78134701 | 1.76310477  | -6.24774405 |
| C | -4.15629496 | 0.36377998  | -6.24774405 |
| C | -3.41756703 | -2.39319019 | -6.24774405 |
| C | -2.39319019 | -3.41756703 | -6.24774405 |
| C | 0.36377998  | -4.15629496 | -6.24774405 |
| C | 1.76310477  | -3.78134701 | -6.24774405 |
| C | 3.78134701  | -1.76310477 | -6.24774405 |

|   |             |             |              |
|---|-------------|-------------|--------------|
| C | 4.15629496  | -0.36377998 | -6.24774405  |
| C | 1.75947119  | 3.77878799  | -7.49912778  |
| C | 0.36564725  | 4.15226199  | -7.49912778  |
| C | -2.39279080 | 3.41314074  | -7.49912778  |
| C | -3.41314074 | 2.39279080  | -7.49912778  |
| C | -4.15226199 | -0.36564725 | -7.49912778  |
| C | -3.77878799 | -1.75947119 | -7.49912778  |
| C | -1.75947119 | -3.77878799 | -7.49912778  |
| C | -0.36564725 | -4.15226199 | -7.49912778  |
| C | 2.39279080  | -3.41314074 | -7.49912778  |
| C | 3.41314074  | -2.39279080 | -7.49912778  |
| C | 4.15226199  | 0.36564725  | -7.49912778  |
| C | 3.77878799  | 1.75947119  | -7.49912778  |
| C | -0.36392654 | 4.15639397  | -8.75085730  |
| C | -1.76302736 | 3.78150604  | -8.75085730  |
| C | -3.78150604 | 1.76302736  | -8.75085730  |
| C | -4.15639397 | 0.36392654  | -8.75085730  |
| C | -3.41757949 | -2.39336661 | -8.75085730  |
| C | -2.39336661 | -3.41757949 | -8.75085730  |
| C | 0.36392654  | -4.15639397 | -8.75085730  |
| C | 1.76302736  | -3.78150604 | -8.75085730  |
| C | 3.78150604  | -1.76302736 | -8.75085730  |
| C | 4.15639397  | -0.36392654 | -8.75085730  |
| C | 3.41757949  | 2.39336661  | -8.75085730  |
| C | 2.39336661  | 3.41757949  | -8.75085730  |
| C | -2.39359847 | 3.41824038  | -9.99736094  |
| C | -3.41824038 | 2.39359847  | -9.99736094  |
| C | -4.15708224 | -0.36379690 | -9.99736094  |
| C | -3.78203727 | -1.76348376 | -9.99736094  |
| C | -1.76348376 | -3.78203727 | -9.99736094  |
| C | -0.36379690 | -4.15708224 | -9.99736094  |
| C | 2.39359847  | -3.41824038 | -9.99736094  |
| C | 3.41824038  | -2.39359847 | -9.99736094  |
| C | 4.15708224  | 0.36379690  | -9.99736094  |
| C | 3.78203727  | 1.76348376  | -9.99736094  |
| C | 1.76348376  | 3.78203727  | -9.99736094  |
| C | 0.36379690  | 4.15708224  | -9.99736094  |
| C | -3.77914656 | 1.75965096  | -11.24853551 |
| C | -4.15266241 | 0.36567085  | -11.24853551 |
| C | -3.41347571 | -2.39301145 | -11.24853551 |
| C | -2.39301145 | -3.41347571 | -11.24853551 |
| C | 0.36567085  | -4.15266241 | -11.24853551 |
| C | 1.75965096  | -3.77914656 | -11.24853551 |
| C | 3.77914656  | -1.75965096 | -11.24853551 |
| C | 4.15266241  | -0.36567085 | -11.24853551 |
| C | 3.41347571  | 2.39301145  | -11.24853551 |
| C | 2.39301145  | 3.41347571  | -11.24853551 |
| C | -0.36567085 | 4.15266241  | -11.24853551 |
| C | -1.75965096 | 3.77914656  | -11.24853551 |
| C | -4.15632501 | -0.36397375 | -12.50034582 |
| C | -3.78146992 | -1.76295199 | -12.50034582 |
| C | -1.76295199 | -3.78146992 | -12.50034582 |
| C | -0.36397375 | -4.15632501 | -12.50034582 |
| C | 2.39337302  | -3.41749617 | -12.50034582 |
| C | 3.41749617  | -2.39337302 | -12.50034582 |
| C | 4.15632501  | 0.36397375  | -12.50034582 |
| C | 3.78146992  | 1.76295199  | -12.50034582 |
| C | 1.76295199  | 3.78146992  | -12.50034582 |
| C | 0.36397375  | 4.15632501  | -12.50034582 |
| C | -2.39337302 | 3.41749617  | -12.50034582 |
| C | -3.41749617 | 2.39337302  | -12.50034582 |
| C | -3.41833296 | -2.39368380 | -13.74667356 |
| C | -2.39368380 | -3.41833296 | -13.74667356 |
| C | 0.36382450  | -4.15720508 | -13.74667356 |
| C | 1.76352128  | -3.78215746 | -13.74667356 |
| C | 3.78215746  | -1.76352128 | -13.74667356 |
| C | 4.15720508  | -0.36382450 | -13.74667356 |
| C | 3.41833296  | 2.39368380  | -13.74667356 |
| C | 2.39368380  | 3.41833296  | -13.74667356 |
| C | -0.36382450 | 4.15720508  | -13.74667356 |

|   |             |             |              |
|---|-------------|-------------|--------------|
| C | -1.76352128 | 3.78215746  | -13.74667356 |
| C | -3.78215746 | 1.76352128  | -13.74667356 |
| C | -4.15720508 | 0.36382450  | -13.74667356 |
| C | -1.75960755 | -3.77949623 | -14.99758871 |
| C | -0.36588327 | -4.15294353 | -14.99758871 |
| C | 2.39333598  | -3.41361296 | -14.99758871 |
| C | 3.41361296  | -2.39333598 | -14.99758871 |
| C | 4.15294353  | 0.36588327  | -14.99758871 |
| C | 3.77949623  | 1.75960755  | -14.99758871 |
| C | 1.75960755  | 3.77949623  | -14.99758871 |
| C | 0.36588327  | 4.15294353  | -14.99758871 |
| C | -2.39333598 | 3.41361296  | -14.99758871 |
| C | -3.41361296 | 2.39333598  | -14.99758871 |
| C | -4.15294353 | -0.36588327 | -14.99758871 |
| C | -3.77949623 | -1.75960755 | -14.99758871 |
| C | 0.36404511  | -4.15664024 | -16.24934544 |
| C | 1.76304781  | -3.78177859 | -16.24934544 |
| C | 3.78177859  | -1.76304781 | -16.24934544 |
| C | 4.15664024  | -0.36404511 | -16.24934544 |
| C | 3.41773348  | 2.39359243  | -16.24934544 |
| C | 2.39359243  | 3.41773348  | -16.24934544 |
| C | -0.36404511 | 4.15664024  | -16.24934544 |
| C | -1.76304781 | 3.78177859  | -16.24934544 |
| C | -3.78177859 | 1.76304781  | -16.24934544 |
| C | -4.15664024 | 0.36404511  | -16.24934544 |
| C | -3.41773348 | -2.39359243 | -16.24934544 |
| C | -2.39359243 | -3.41773348 | -16.24934544 |
| C | 2.39352971  | -3.41847255 | -17.49535203 |
| C | 3.41847255  | -2.39352971 | -17.49535203 |
| C | 4.15724893  | 0.36362126  | -17.49535203 |
| C | 3.78209381  | 1.76371921  | -17.49535203 |
| C | 1.76371921  | 3.78209381  | -17.49535203 |
| C | 0.36362126  | 4.15724893  | -17.49535203 |
| C | -2.39352971 | 3.41847255  | -17.49535203 |
| C | -3.41847255 | 2.39352971  | -17.49535203 |
| C | -4.15724893 | -0.36362126 | -17.49535203 |
| C | -3.78209381 | -1.76371921 | -17.49535203 |
| C | -1.76371921 | -3.78209381 | -17.49535203 |
| C | -0.36362126 | -4.15724893 | -17.49535203 |
| C | 3.77919951  | -1.75945729 | -18.74606777 |
| C | 4.15261142  | -0.36586504 | -18.74606777 |
| C | 3.41333446  | 2.39315413  | -18.74606777 |
| C | 2.39315413  | 3.41333446  | -18.74606777 |
| C | -0.36586504 | 4.15261142  | -18.74606777 |
| C | -1.75945729 | 3.77919951  | -18.74606777 |
| C | -3.77919951 | 1.75945729  | -18.74606777 |
| C | -4.15261142 | 0.36586504  | -18.74606777 |
| C | -3.41333446 | -2.39315413 | -18.74606777 |
| C | -2.39315413 | -3.41333446 | -18.74606777 |
| C | 0.36586504  | -4.15261142 | -18.74606777 |
| C | 1.75945729  | -3.77919951 | -18.74606777 |
| C | 4.15666029  | 0.36400298  | -19.99801470 |
| C | 3.78177490  | 1.76309432  | -19.99801470 |
| C | 1.76309432  | 3.78177490  | -19.99801470 |
| C | 0.36400298  | 4.15666029  | -19.99801470 |
| C | -2.39356597 | 3.41777192  | -19.99801470 |
| C | -3.41777192 | 2.39356597  | -19.99801470 |
| C | -4.15666029 | -0.36400298 | -19.99801470 |
| C | -3.78177490 | -1.76309432 | -19.99801470 |
| C | -1.76309432 | -3.78177490 | -19.99801470 |
| C | -0.36400298 | -4.15666029 | -19.99801470 |
| C | 2.39356597  | -3.41777192 | -19.99801470 |
| C | 3.41777192  | -2.39356597 | -19.99801470 |
| C | 3.41862000  | 2.39348553  | -21.24359641 |
| C | 2.39348553  | 3.41862000  | -21.24359641 |
| C | -0.36350927 | 4.15735453  | -21.24359641 |
| C | -1.76386900 | 3.78212927  | -21.24359641 |
| C | -3.78212927 | 1.76386900  | -21.24359641 |
| C | -4.15735453 | 0.36350927  | -21.24359641 |
| C | -3.41862000 | -2.39348553 | -21.24359641 |

|   |             |             |              |
|---|-------------|-------------|--------------|
| C | -2.39348553 | -3.41862000 | -21.24359641 |
| C | 0.36350927  | -4.15735453 | -21.24359641 |
| C | 1.76386900  | -3.78212927 | -21.24359641 |
| C | 3.78212927  | -1.76386900 | -21.24359641 |
| C | 4.15735453  | -0.36350927 | -21.24359641 |
| C | 1.75907951  | 3.77882784  | -22.49444568 |
| C | 0.36600638  | 4.15210066  | -22.49444568 |
| C | -2.39302115 | 3.41282146  | -22.49444568 |
| C | -3.41282146 | 2.39302115  | -22.49444568 |
| C | -4.15210066 | -0.36600638 | -22.49444568 |
| C | -3.77882784 | -1.75907951 | -22.49444568 |
| C | -1.75907951 | -3.77882784 | -22.49444568 |
| C | -0.36600638 | -4.15210066 | -22.49444568 |
| C | 2.39302115  | -3.41282146 | -22.49444568 |
| C | 3.41282146  | -2.39302115 | -22.49444568 |
| C | 4.15210066  | 0.36600638  | -22.49444568 |
| C | 3.77882784  | 1.75907951  | -22.49444568 |
| C | -0.36397384 | 4.15658709  | -23.74687287 |
| C | -1.76308295 | 3.78169694  | -23.74687287 |
| C | -3.78169694 | 1.76308295  | -23.74687287 |
| C | -4.15658709 | 0.36397384  | -23.74687287 |
| C | -3.41772309 | -2.39350414 | -23.74687287 |
| C | -2.39350414 | -3.41772309 | -23.74687287 |
| C | 0.36397384  | -4.15658709 | -23.74687287 |
| C | 1.76308295  | -3.78169694 | -23.74687287 |
| C | 3.78169694  | -1.76308295 | -23.74687287 |
| C | 4.15658709  | -0.36397384 | -23.74687287 |
| C | 3.41772309  | 2.39350414  | -23.74687287 |
| C | 2.39350414  | 3.41772309  | -23.74687287 |
| C | -2.39358285 | 3.41912300  | -24.99212149 |
| C | -3.41912300 | 2.39358285  | -24.99212149 |
| C | -4.15783880 | -0.36334205 | -24.99212149 |
| C | -3.78246505 | -1.76425595 | -24.99212149 |
| C | -1.76425595 | -3.78246505 | -24.99212149 |
| C | -0.36334205 | -4.15783880 | -24.99212149 |
| C | 2.39358285  | -3.41912300 | -24.99212149 |
| C | 3.41912300  | -2.39358285 | -24.99212149 |
| C | 4.15783880  | 0.36334205  | -24.99212149 |
| C | 3.78246505  | 1.76425595  | -24.99212149 |
| C | 1.76425595  | 3.78246505  | -24.99212149 |
| C | 0.36334205  | 4.15783880  | -24.99212149 |
| C | -3.77857504 | 1.75869451  | -26.24308767 |
| C | -4.15168923 | 0.36621340  | -26.24308767 |
| C | -3.41236164 | -2.39299472 | -26.24308767 |
| C | -2.39299472 | -3.41236164 | -26.24308767 |
| C | 0.36621340  | -4.15168923 | -26.24308767 |
| C | 1.75869451  | -3.77857504 | -26.24308767 |
| C | 3.77857504  | -1.75869451 | -26.24308767 |
| C | 4.15168923  | -0.36621340 | -26.24308767 |
| C | 3.41236164  | 2.39299472  | -26.24308767 |
| C | 2.39299472  | 3.41236164  | -26.24308767 |
| C | -0.36621340 | 4.15168923  | -26.24308767 |
| C | -1.75869451 | 3.77857504  | -26.24308767 |
| C | -4.15675097 | -0.36394179 | -27.49626536 |
| C | -3.78182283 | -1.76319264 | -27.49626536 |
| C | -1.76319264 | -3.78182283 | -27.49626536 |
| C | -0.36394179 | -4.15675097 | -27.49626536 |
| C | 2.39355832  | -3.41788104 | -27.49626536 |
| C | 3.41788104  | -2.39355832 | -27.49626536 |
| C | 4.15675097  | 0.36394179  | -27.49626536 |
| C | 3.78182283  | 1.76319264  | -27.49626536 |
| C | 1.76319264  | 3.78182283  | -27.49626536 |
| C | 0.36394179  | 4.15675097  | -27.49626536 |
| C | -2.39355832 | 3.41788104  | -27.49626536 |
| C | -3.41788104 | 2.39355832  | -27.49626536 |
| C | -3.42037910 | -2.39401083 | -28.74097359 |
| C | -2.39401083 | -3.42037910 | -28.74097359 |
| C | 0.36308464  | -4.15914061 | -28.74097359 |
| C | 1.76512978  | -3.78346375 | -28.74097359 |
| C | 3.78346375  | -1.76512978 | -28.74097359 |

|   |             |             |              |
|---|-------------|-------------|--------------|
| C | 4.15914061  | -0.36308464 | -28.74097359 |
| C | 3.42037910  | 2.39401083  | -28.74097359 |
| C | 2.39401083  | 3.42037910  | -28.74097359 |
| C | -0.36308464 | 4.15914061  | -28.74097359 |
| C | -1.76512978 | 3.78346375  | -28.74097359 |
| C | -3.78346375 | 1.76512978  | -28.74097359 |
| C | -4.15914061 | 0.36308464  | -28.74097359 |
| C | -1.75791212 | -3.77853416 | -29.99171401 |
| C | -0.36687052 | -4.15126263 | -29.99171401 |
| C | 2.39335051  | -3.41166364 | -29.99171401 |
| C | 3.41166364  | -2.39335051 | -29.99171401 |
| C | 4.15126263  | 0.36687052  | -29.99171401 |
| C | 3.77853416  | 1.75791212  | -29.99171401 |
| C | 1.75791212  | 3.77853416  | -29.99171401 |
| C | 0.36687052  | 4.15126263  | -29.99171401 |
| C | -2.39335051 | 3.41166364  | -29.99171401 |
| C | -3.41166364 | 2.39335051  | -29.99171401 |
| C | -4.15126263 | -0.36687052 | -29.99171401 |
| C | -3.77853416 | -1.75791212 | -29.99171401 |
| C | 0.36380471  | -4.15552938 | -31.24664853 |
| C | 1.76270057  | -3.78069636 | -31.24664853 |
| C | 3.78069636  | -1.76270057 | -31.24664853 |
| C | 4.15552938  | -0.36380471 | -31.24664853 |
| C | 3.41689165  | 2.39282881  | -31.24664853 |
| C | 2.39282881  | 3.41689165  | -31.24664853 |
| C | -0.36380471 | 4.15552938  | -31.24664853 |
| C | -1.76270057 | 3.78069636  | -31.24664853 |
| C | -3.78069636 | 1.76270057  | -31.24664853 |
| C | -4.15552938 | 0.36380471  | -31.24664853 |
| C | -3.41689165 | -2.39282881 | -31.24664853 |
| C | -2.39282881 | -3.41689165 | -31.24664853 |
| C | 2.39045371  | -3.41720634 | -32.48978695 |
| C | 3.41720634  | -2.39045371 | -32.48978695 |
| C | 4.15461435  | 0.36159047  | -32.48978695 |
| C | 3.77879681  | 1.76416065  | -32.48978695 |
| C | 1.76416065  | 3.77879681  | -32.48978695 |
| C | 0.36159047  | 4.15461435  | -32.48978695 |
| C | -2.39045371 | 3.41720634  | -32.48978695 |
| C | -3.41720634 | 2.39045371  | -32.48978695 |
| C | -4.15461435 | -0.36159047 | -32.48978695 |
| C | -3.77879681 | -1.76416065 | -32.48978695 |
| C | -1.76416065 | -3.77879681 | -32.48978695 |
| C | -0.36159047 | -4.15461435 | -32.48978695 |
| C | 3.76450383  | -1.75027309 | -33.74036813 |
| C | 4.13529249  | -0.36647095 | -33.74036813 |
| C | 3.39803288  | 2.38501940  | -33.74036813 |
| C | 2.38501940  | 3.39803288  | -33.74036813 |
| C | -0.36647095 | 4.13529249  | -33.74036813 |
| C | -1.75027309 | 3.76450383  | -33.74036813 |
| C | -3.76450383 | 1.75027309  | -33.74036813 |
| C | -4.13529249 | 0.36647095  | -33.74036813 |
| C | -3.39803288 | -2.38501940 | -33.74036813 |
| C | -2.38501940 | -3.39803288 | -33.74036813 |
| C | 0.36647095  | -4.13529249 | -33.74036813 |
| C | 1.75027309  | -3.76450383 | -33.74036813 |
| C | 4.14585383  | 0.35985205  | -35.00324228 |
| C | 3.77034076  | 1.76128589  | -35.00324228 |
| C | 1.76128589  | 3.77034076  | -35.00324228 |
| C | 0.35985205  | 4.14585383  | -35.00324228 |
| C | -2.38456794 | 3.41048871  | -35.00324228 |
| C | -3.41048871 | 2.38456794  | -35.00324228 |
| C | -4.14585383 | -0.35985205 | -35.00324228 |
| C | -3.77034076 | -1.76128589 | -35.00324228 |
| C | -1.76128589 | -3.77034076 | -35.00324228 |
| C | -0.35985205 | -4.14585383 | -35.00324228 |
| C | 2.38456794  | -3.41048871 | -35.00324228 |
| C | 3.41048871  | -2.38456794 | -35.00324228 |
| C | 3.45649063  | 2.41414711  | -36.24345976 |
| C | 2.41414711  | 3.45649063  | -36.24345976 |
| C | -0.36246741 | 4.20048225  | -36.24345976 |

|   |             |             |              |
|---|-------------|-------------|--------------|
| C | -1.78633514 | 3.81895804  | -36.24345976 |
| C | -3.81895804 | 1.78633514  | -36.24345976 |
| C | -4.20048225 | 0.36246741  | -36.24345976 |
| C | -3.45649063 | -2.41414711 | -36.24345976 |
| C | -2.41414711 | -3.45649063 | -36.24345976 |
| C | 0.36246741  | -4.20048225 | -36.24345976 |
| C | 1.78633514  | -3.81895804 | -36.24345976 |
| C | 3.81895804  | -1.78633514 | -36.24345976 |
| C | 4.20048225  | -0.36246741 | -36.24345976 |
| C | 1.76092111  | 3.89288572  | -37.45598347 |
| C | 0.42144045  | 4.25179848  | -37.45598347 |
| C | -2.49087737 | 3.47144527  | -37.45598347 |
| C | -3.47144527 | 2.49087737  | -37.45598347 |
| C | -4.25179848 | -0.42144045 | -37.45598347 |
| C | -3.89288572 | -1.76092111 | -37.45598347 |
| C | -1.76092111 | -3.89288572 | -37.45598347 |
| C | -0.42144045 | -4.25179848 | -37.45598347 |
| C | 2.49087737  | -3.47144527 | -37.45598347 |
| C | 3.47144527  | -2.49087737 | -37.45598347 |
| C | 4.25179848  | 0.42144045  | -37.45598347 |
| C | 3.89288572  | 1.76092111  | -37.45598347 |
| H | 2.29136130  | 3.81312587  | 38.41365156  |
| H | -0.07781416 | 4.44794452  | 38.41365156  |
| H | -2.15658322 | 3.89094003  | 38.41365156  |
| H | -3.89094003 | 2.15658322  | 38.41365156  |
| H | -4.44794452 | 0.07781416  | 38.41365156  |
| H | -3.81312587 | -2.29136130 | 38.41365156  |
| H | -2.29136130 | -3.81312587 | 38.41365156  |
| H | 0.07781416  | -4.44794452 | 38.41365156  |
| H | 2.15658322  | -3.89094003 | 38.41365156  |
| H | 3.89094003  | -2.15658322 | 38.41365156  |
| H | 4.44794452  | -0.07781416 | 38.41365156  |
| H | 3.81312587  | 2.29136130  | 38.41365156  |
| H | 2.29136130  | 3.81312587  | -38.41365156 |
| H | -0.07781416 | 4.44794452  | -38.41365156 |
| H | -2.15658322 | 3.89094003  | -38.41365156 |
| H | -3.89094003 | 2.15658322  | -38.41365156 |
| H | -4.44794452 | 0.07781416  | -38.41365156 |
| H | -3.81312587 | -2.29136130 | -38.41365156 |
| H | -2.29136130 | -3.81312587 | -38.41365156 |
| H | 0.07781416  | -4.44794452 | -38.41365156 |
| H | 2.15658322  | -3.89094003 | -38.41365156 |
| H | 3.89094003  | -2.15658322 | -38.41365156 |
| H | 4.44794452  | -0.07781416 | -38.41365156 |
| H | 3.81312587  | 2.29136130  | -38.41365156 |

Nanotube (6,6) u31v0s  
B3LYP/STO-3G Energy: -28024.077238

|   |           |           |           |
|---|-----------|-----------|-----------|
| 6 | -0.692831 | -4.213897 | 38.089587 |
| 6 | 0.692831  | -4.213897 | 38.089587 |
| 6 | 3.302927  | -2.706958 | 38.089587 |
| 6 | 3.995758  | -1.506940 | 38.089587 |
| 6 | 3.995758  | 1.506940  | 38.089587 |
| 6 | 3.302927  | 2.706958  | 38.089587 |
| 6 | 0.692831  | 4.213897  | 38.089587 |
| 6 | -0.692831 | 4.213897  | 38.089587 |
| 6 | -3.302927 | 2.706958  | 38.089587 |
| 6 | -3.995758 | 1.506940  | 38.089587 |
| 6 | -3.995758 | -1.506940 | 38.089587 |
| 6 | -3.302927 | -2.706958 | 38.089587 |
| 6 | 1.437283  | -3.961993 | 36.875742 |
| 6 | 2.712545  | -3.225720 | 36.875742 |
| 6 | 4.149828  | -0.736273 | 36.875742 |
| 6 | 4.149828  | 0.736273  | 36.875742 |
| 6 | 2.712545  | 3.225720  | 36.875742 |
| 6 | 1.437283  | 3.961993  | 36.875742 |
| 6 | -1.437283 | 3.961993  | 36.875742 |



|   |           |           |           |
|---|-----------|-----------|-----------|
| 6 | -2.712545 | 3.225720  | 36.875742 |
| 6 | -4.149828 | 0.736273  | 36.875742 |
| 6 | -4.149828 | -0.736273 | 36.875742 |
| 6 | -2.712545 | -3.225720 | 36.875742 |
| 6 | -1.437283 | -3.961993 | 36.875742 |
| 6 | 3.186154  | -2.677414 | 35.635582 |
| 6 | 3.911786  | -1.420584 | 35.635582 |
| 6 | 3.911786  | 1.420584  | 35.635582 |
| 6 | 3.186154  | 2.677414  | 35.635582 |
| 6 | 0.725631  | 4.097998  | 35.635582 |
| 6 | -0.725631 | 4.097998  | 35.635582 |
| 6 | -3.186154 | 2.677414  | 35.635582 |
| 6 | -3.911786 | 1.420584  | 35.635582 |
| 6 | -3.911786 | -1.420584 | 35.635582 |
| 6 | -3.186154 | -2.677414 | 35.635582 |
| 6 | -0.725631 | -4.097998 | 35.635582 |
| 6 | 0.725631  | -4.097998 | 35.635582 |
| 6 | 4.088273  | -0.715751 | 34.373317 |
| 6 | 4.088273  | 0.715751  | 34.373317 |
| 6 | 2.663995  | 3.182672  | 34.373317 |
| 6 | 1.424278  | 3.898424  | 34.373317 |
| 6 | -1.424278 | 3.898424  | 34.373317 |
| 6 | -2.663995 | 3.182672  | 34.373317 |
| 6 | -4.088273 | 0.715751  | 34.373317 |
| 6 | -4.088273 | -0.715751 | 34.373317 |
| 6 | -2.663995 | -3.182672 | 34.373317 |
| 6 | -1.424278 | -3.898424 | 34.373317 |
| 6 | 1.424278  | -3.898424 | 34.373317 |
| 6 | 2.663995  | -3.182672 | 34.373317 |
| 6 | 3.917883  | 1.424615  | 33.121440 |
| 6 | 3.192694  | 2.680679  | 33.121440 |
| 6 | 0.725189  | 4.105294  | 33.121440 |
| 6 | -0.725189 | 4.105294  | 33.121440 |
| 6 | -3.192694 | 2.680679  | 33.121440 |
| 6 | -3.917883 | 1.424615  | 33.121440 |
| 6 | -3.917883 | -1.424615 | 33.121440 |
| 6 | -3.192694 | -2.680679 | 33.121440 |
| 6 | -0.725189 | -4.105294 | 33.121440 |
| 6 | 0.725189  | -4.105294 | 33.121440 |
| 6 | 3.192694  | -2.680679 | 33.121440 |
| 6 | 3.917883  | -1.424615 | 33.121440 |
| 6 | 2.681684  | 3.195788  | 31.878348 |
| 6 | 1.426791  | 3.920301  | 31.878348 |
| 6 | -1.426791 | 3.920301  | 31.878348 |
| 6 | -2.681684 | 3.195788  | 31.878348 |
| 6 | -4.108476 | 0.724513  | 31.878348 |
| 6 | -4.108476 | -0.724513 | 31.878348 |
| 6 | -2.681684 | -3.195788 | 31.878348 |
| 6 | -1.426791 | -3.920301 | 31.878348 |
| 6 | 1.426791  | -3.920301 | 31.878348 |
| 6 | 2.681684  | -3.195788 | 31.878348 |
| 6 | 4.108476  | -0.724513 | 31.878348 |
| 6 | 4.108476  | 0.724513  | 31.878348 |
| 6 | 0.719611  | 4.103933  | 30.624312 |
| 6 | -0.719611 | 4.103933  | 30.624312 |
| 6 | -3.194304 | 2.675168  | 30.624312 |
| 6 | -3.913916 | 1.428765  | 30.624312 |
| 6 | -3.913916 | -1.428765 | 30.624312 |
| 6 | -3.194304 | -2.675168 | 30.624312 |
| 6 | -0.719611 | -4.103933 | 30.624312 |
| 6 | 0.719611  | -4.103933 | 30.624312 |
| 6 | 3.194304  | -2.675168 | 30.624312 |
| 6 | 3.913916  | -1.428765 | 30.624312 |
| 6 | 3.913916  | 1.428765  | 30.624312 |
| 6 | 3.194304  | 2.675168  | 30.624312 |
| 6 | -1.427159 | 3.921388  | 29.372023 |
| 6 | -2.682442 | 3.196650  | 29.372023 |
| 6 | -4.109601 | 0.724738  | 29.372023 |
| 6 | -4.109601 | -0.724738 | 29.372023 |
| 6 | -2.682442 | -3.196650 | 29.372023 |

|   |           |           |           |
|---|-----------|-----------|-----------|
| 6 | -1.427159 | -3.921388 | 29.372023 |
| 6 | 1.427159  | -3.921388 | 29.372023 |
| 6 | 2.682442  | -3.196650 | 29.372023 |
| 6 | 4.109601  | -0.724738 | 29.372023 |
| 6 | 4.109601  | 0.724738  | 29.372023 |
| 6 | 2.682442  | 3.196650  | 29.372023 |
| 6 | 1.427159  | 3.921388  | 29.372023 |
| 6 | -3.196472 | 2.682254  | 28.127223 |
| 6 | -3.921136 | 1.427099  | 28.127223 |
| 6 | -3.921136 | -1.427099 | 28.127223 |
| 6 | -3.196472 | -2.682254 | 28.127223 |
| 6 | -0.724664 | -4.109353 | 28.127223 |
| 6 | 0.724664  | -4.109353 | 28.127223 |
| 6 | 3.196472  | -2.682254 | 28.127223 |
| 6 | 3.921136  | -1.427099 | 28.127223 |
| 6 | 3.921136  | 1.427099  | 28.127223 |
| 6 | 3.196472  | 2.682254  | 28.127223 |
| 6 | 0.724664  | 4.109353  | 28.127223 |
| 6 | -0.724664 | 4.109353  | 28.127223 |
| 6 | -4.103966 | 0.720306  | 26.874959 |
| 6 | -4.103966 | -0.720306 | 26.874959 |
| 6 | -2.675787 | -3.193986 | 26.874959 |
| 6 | -1.428179 | -3.914292 | 26.874959 |
| 6 | 1.428179  | -3.914292 | 26.874959 |
| 6 | 2.675787  | -3.193986 | 26.874959 |
| 6 | 4.103966  | -0.720306 | 26.874959 |
| 6 | 4.103966  | 0.720306  | 26.874959 |
| 6 | 2.675787  | 3.193986  | 26.874959 |
| 6 | 1.428179  | 3.914292  | 26.874959 |
| 6 | -1.428179 | 3.914292  | 26.874959 |
| 6 | -2.675787 | 3.193986  | 26.874959 |
| 6 | -3.919751 | -1.427090 | 25.622324 |
| 6 | -3.195771 | -2.681059 | 25.622324 |
| 6 | -0.723980 | -4.108149 | 25.622324 |
| 6 | 0.723980  | -4.108149 | 25.622324 |
| 6 | 3.195771  | -2.681059 | 25.622324 |
| 6 | 3.919751  | -1.427090 | 25.622324 |
| 6 | 3.919751  | 1.427090  | 25.622324 |
| 6 | 3.195771  | 2.681059  | 25.622324 |
| 6 | 0.723980  | 4.108149  | 25.622324 |
| 6 | -0.723980 | 4.108149  | 25.622324 |
| 6 | -3.195771 | 2.681059  | 25.622324 |
| 6 | -3.919751 | 1.427090  | 25.622324 |
| 6 | -2.682140 | -3.196263 | 24.376660 |
| 6 | -1.426975 | -3.920932 | 24.376660 |
| 6 | 1.426975  | -3.920932 | 24.376660 |
| 6 | 2.682140  | -3.196263 | 24.376660 |
| 6 | 4.109114  | -0.724670 | 24.376660 |
| 6 | 4.109114  | 0.724670  | 24.376660 |
| 6 | 2.682140  | 3.196263  | 24.376660 |
| 6 | 1.426975  | 3.920932  | 24.376660 |
| 6 | -1.426975 | 3.920932  | 24.376660 |
| 6 | -2.682140 | 3.196263  | 24.376660 |
| 6 | -4.109114 | 0.724670  | 24.376660 |
| 6 | -4.109114 | -0.724670 | 24.376660 |
| 6 | -0.720750 | -4.104416 | 23.125379 |
| 6 | 0.720750  | -4.104416 | 23.125379 |
| 6 | 3.194153  | -2.676396 | 23.125379 |
| 6 | 3.914904  | -1.428020 | 23.125379 |
| 6 | 3.914904  | 1.428020  | 23.125379 |
| 6 | 3.194153  | 2.676396  | 23.125379 |
| 6 | 0.720750  | 4.104416  | 23.125379 |
| 6 | -0.720750 | 4.104416  | 23.125379 |
| 6 | -3.194153 | 2.676396  | 23.125379 |
| 6 | -3.914904 | 1.428020  | 23.125379 |
| 6 | -3.914904 | -1.428020 | 23.125379 |
| 6 | -3.194153 | -2.676396 | 23.125379 |
| 6 | 1.427216  | -3.919143 | 21.872636 |
| 6 | 2.680470  | -3.195577 | 21.872636 |
| 6 | 4.107686  | -0.723567 | 21.872636 |

|   |           |           |           |
|---|-----------|-----------|-----------|
| 6 | 4.107686  | 0.723567  | 21.872636 |
| 6 | 2.680470  | 3.195577  | 21.872636 |
| 6 | 1.427216  | 3.919143  | 21.872636 |
| 6 | -1.427216 | 3.919143  | 21.872636 |
| 6 | -2.680470 | 3.195577  | 21.872636 |
| 6 | -4.107686 | 0.723567  | 21.872636 |
| 6 | -4.107686 | -0.723567 | 21.872636 |
| 6 | -2.680470 | -3.195577 | 21.872636 |
| 6 | -1.427216 | -3.919143 | 21.872636 |
| 6 | 3.196291  | -2.682174 | 20.626430 |
| 6 | 3.920977  | -1.426982 | 20.626430 |
| 6 | 3.920977  | 1.426982  | 20.626430 |
| 6 | 3.196291  | 2.682174  | 20.626430 |
| 6 | 0.724685  | 4.109157  | 20.626430 |
| 6 | -0.724685 | 4.109157  | 20.626430 |
| 6 | -3.196291 | 2.682174  | 20.626430 |
| 6 | -3.920977 | 1.426982  | 20.626430 |
| 6 | -3.920977 | -1.426982 | 20.626430 |
| 6 | -3.196291 | -2.682174 | 20.626430 |
| 6 | -0.724685 | -4.109157 | 20.626430 |
| 6 | 0.724685  | -4.109157 | 20.626430 |
| 6 | 4.104775  | -0.721029 | 19.375816 |
| 6 | 4.104775  | 0.721029  | 19.375816 |
| 6 | 2.676817  | 3.194325  | 19.375816 |
| 6 | 1.427958  | 3.915354  | 19.375816 |
| 6 | -1.427958 | 3.915354  | 19.375816 |
| 6 | -2.676817 | 3.194325  | 19.375816 |
| 6 | -4.104775 | 0.721029  | 19.375816 |
| 6 | -4.104775 | -0.721029 | 19.375816 |
| 6 | -2.676817 | -3.194325 | 19.375816 |
| 6 | -1.427958 | -3.915354 | 19.375816 |
| 6 | 1.427958  | -3.915354 | 19.375816 |
| 6 | 2.676817  | -3.194325 | 19.375816 |
| 6 | 3.918734  | 1.427324  | 18.122964 |
| 6 | 3.195466  | 2.680061  | 18.122964 |
| 6 | 0.723268  | 4.107385  | 18.122964 |
| 6 | -0.723268 | 4.107385  | 18.122964 |
| 6 | -3.195466 | 2.680061  | 18.122964 |
| 6 | -3.918734 | 1.427324  | 18.122964 |
| 6 | -3.918734 | -1.427324 | 18.122964 |
| 6 | -3.195466 | -2.680061 | 18.122964 |
| 6 | -0.723268 | -4.107385 | 18.122964 |
| 6 | 0.723268  | -4.107385 | 18.122964 |
| 6 | 3.195466  | -2.680061 | 18.122964 |
| 6 | 3.918734  | -1.427324 | 18.122964 |
| 6 | 2.682339  | 3.196391  | 16.876284 |
| 6 | 1.426986  | 3.921169  | 16.876284 |
| 6 | -1.426986 | 3.921169  | 16.876284 |
| 6 | -2.682339 | 3.196391  | 16.876284 |
| 6 | -4.109325 | 0.724778  | 16.876284 |
| 6 | -4.109325 | -0.724778 | 16.876284 |
| 6 | -2.682339 | -3.196391 | 16.876284 |
| 6 | -1.426986 | -3.921169 | 16.876284 |
| 6 | 1.426986  | -3.921169 | 16.876284 |
| 6 | 2.682339  | -3.196391 | 16.876284 |
| 6 | 4.109325  | -0.724778 | 16.876284 |
| 6 | 4.109325  | 0.724778  | 16.876284 |
| 6 | 0.721315  | 4.105222  | 15.626152 |
| 6 | -0.721315 | 4.105222  | 15.626152 |
| 6 | -3.194570 | 2.677288  | 15.626152 |
| 6 | -3.915884 | 1.427934  | 15.626152 |
| 6 | -3.915884 | -1.427934 | 15.626152 |
| 6 | -3.194570 | -2.677288 | 15.626152 |
| 6 | -0.721315 | -4.105222 | 15.626152 |
| 6 | 0.721315  | -4.105222 | 15.626152 |
| 6 | 3.194570  | -2.677288 | 15.626152 |
| 6 | 3.915884  | -1.427934 | 15.626152 |
| 6 | 3.915884  | 1.427934  | 15.626152 |
| 6 | 3.194570  | 2.677288  | 15.626152 |
| 6 | -1.427471 | 3.918479  | 14.373173 |

|   |           |           |           |
|---|-----------|-----------|-----------|
| 6 | -2.679767 | 3.195466  | 14.373173 |
| 6 | -4.107238 | 0.723013  | 14.373173 |
| 6 | -4.107238 | -0.723013 | 14.373173 |
| 6 | -2.679767 | -3.195466 | 14.373173 |
| 6 | -1.427471 | -3.918479 | 14.373173 |
| 6 | 1.427471  | -3.918479 | 14.373173 |
| 6 | 2.679767  | -3.195466 | 14.373173 |
| 6 | 4.107238  | -0.723013 | 14.373173 |
| 6 | 4.107238  | 0.723013  | 14.373173 |
| 6 | 2.679767  | 3.195466  | 14.373173 |
| 6 | 1.427471  | 3.918479  | 14.373173 |
| 6 | -3.196547 | 2.682472  | 13.126054 |
| 6 | -3.921362 | 1.427055  | 13.126054 |
| 6 | -3.921362 | -1.427055 | 13.126054 |
| 6 | -3.196547 | -2.682472 | 13.126054 |
| 6 | -0.724816 | -4.109527 | 13.126054 |
| 6 | 0.724816  | -4.109527 | 13.126054 |
| 6 | 3.196547  | -2.682472 | 13.126054 |
| 6 | 3.921362  | -1.427055 | 13.126054 |
| 6 | 3.921362  | 1.427055  | 13.126054 |
| 6 | 3.196547  | 2.682472  | 13.126054 |
| 6 | 0.724816  | 4.109527  | 13.126054 |
| 6 | -0.724816 | 4.109527  | 13.126054 |
| 6 | -4.105645 | 0.721546  | 11.876334 |
| 6 | -4.105645 | -0.721546 | 11.876334 |
| 6 | -2.677699 | -3.194820 | 11.876334 |
| 6 | -1.427945 | -3.916365 | 11.876334 |
| 6 | 1.427945  | -3.916365 | 11.876334 |
| 6 | 2.677699  | -3.194820 | 11.876334 |
| 6 | 4.105645  | -0.721546 | 11.876334 |
| 6 | 4.105645  | 0.721546  | 11.876334 |
| 6 | 2.677699  | 3.194820  | 11.876334 |
| 6 | 1.427945  | 3.916365  | 11.876334 |
| 6 | -1.427945 | 3.916365  | 11.876334 |
| 6 | -2.677699 | 3.194820  | 11.876334 |
| 6 | -3.918294 | -1.427592 | 10.623239 |
| 6 | -3.195478 | -2.679546 | 10.623239 |
| 6 | -0.722816 | -4.107138 | 10.623239 |
| 6 | 0.722816  | -4.107138 | 10.623239 |
| 6 | 3.195478  | -2.679546 | 10.623239 |
| 6 | 3.918294  | -1.427592 | 10.623239 |
| 6 | 3.918294  | 1.427592  | 10.623239 |
| 6 | 3.195478  | 2.679546  | 10.623239 |
| 6 | 0.722816  | 4.107138  | 10.623239 |
| 6 | -0.722816 | 4.107138  | 10.623239 |
| 6 | -3.195478 | 2.679546  | 10.623239 |
| 6 | -3.918294 | 1.427592  | 10.623239 |
| 6 | -2.682656 | -3.196682 | 9.375708  |
| 6 | -1.427080 | -3.921589 | 9.375708  |
| 6 | 1.427080  | -3.921589 | 9.375708  |
| 6 | 2.682656  | -3.196682 | 9.375708  |
| 6 | 4.109735  | -0.724907 | 9.375708  |
| 6 | 4.109735  | 0.724907  | 9.375708  |
| 6 | 2.682656  | 3.196682  | 9.375708  |
| 6 | 1.427080  | 3.921589  | 9.375708  |
| 6 | -1.427080 | 3.921589  | 9.375708  |
| 6 | -2.682656 | 3.196682  | 9.375708  |
| 6 | -4.109735 | 0.724907  | 9.375708  |
| 6 | -4.109735 | -0.724907 | 9.375708  |
| 6 | -0.721782 | -4.106020 | 8.126358  |
| 6 | 0.721782  | -4.106020 | 8.126358  |
| 6 | 3.195027  | -2.678091 | 8.126358  |
| 6 | 3.916808  | -1.427929 | 8.126358  |
| 6 | 3.916808  | 1.427929  | 8.126358  |
| 6 | 3.195027  | 2.678091  | 8.126358  |
| 6 | 0.721782  | 4.106020  | 8.126358  |
| 6 | -0.721782 | 4.106020  | 8.126358  |
| 6 | -3.195027 | 2.678091  | 8.126358  |
| 6 | -3.916808 | 1.427929  | 8.126358  |
| 6 | -3.916808 | -1.427929 | 8.126358  |

|   |           |           |          |
|---|-----------|-----------|----------|
| 6 | -3.195027 | -2.678091 | 8.126358 |
| 6 | 1.427697  | -3.918014 | 6.873179 |
| 6 | 2.679251  | -3.195428 | 6.873179 |
| 6 | 4.106948  | -0.722585 | 6.873179 |
| 6 | 4.106948  | 0.722585  | 6.873179 |
| 6 | 2.679251  | 3.195428  | 6.873179 |
| 6 | 1.427697  | 3.918014  | 6.873179 |
| 6 | -1.427697 | 3.918014  | 6.873179 |
| 6 | -2.679251 | 3.195428  | 6.873179 |
| 6 | -4.106948 | 0.722585  | 6.873179 |
| 6 | -4.106948 | -0.722585 | 6.873179 |
| 6 | -2.679251 | -3.195428 | 6.873179 |
| 6 | -1.427697 | -3.918014 | 6.873179 |
| 6 | 3.196717  | -2.682678 | 5.625285 |
| 6 | 3.921625  | -1.427099 | 5.625285 |
| 6 | 3.921625  | 1.427099  | 5.625285 |
| 6 | 3.196717  | 2.682678  | 5.625285 |
| 6 | 0.724909  | 4.109777  | 5.625285 |
| 6 | -0.724909 | 4.109777  | 5.625285 |
| 6 | -3.196717 | 2.682678  | 5.625285 |
| 6 | -3.921625 | 1.427099  | 5.625285 |
| 6 | -3.921625 | -1.427099 | 5.625285 |
| 6 | -3.196717 | -2.682678 | 5.625285 |
| 6 | -0.724909 | -4.109777 | 5.625285 |
| 6 | 0.724909  | -4.109777 | 5.625285 |
| 6 | 4.106230  | -0.721965 | 4.376336 |
| 6 | 4.106230  | 0.721965  | 4.376336 |
| 6 | 2.678355  | 3.195117  | 4.376336 |
| 6 | 1.427875  | 3.917082  | 4.376336 |
| 6 | -1.427875 | 3.917082  | 4.376336 |
| 6 | -2.678355 | 3.195117  | 4.376336 |
| 6 | -4.106230 | 0.721965  | 4.376336 |
| 6 | -4.106230 | -0.721965 | 4.376336 |
| 6 | -2.678355 | -3.195117 | 4.376336 |
| 6 | -1.427875 | -3.917082 | 4.376336 |
| 6 | 1.427875  | -3.917082 | 4.376336 |
| 6 | 2.678355  | -3.195117 | 4.376336 |
| 6 | 3.917666  | 1.427742  | 3.123138 |
| 6 | 3.195294  | 2.678927  | 3.123138 |
| 6 | 0.722372  | 4.106669  | 3.123138 |
| 6 | -0.722372 | 4.106669  | 3.123138 |
| 6 | -3.195294 | 2.678927  | 3.123138 |
| 6 | -3.917666 | 1.427742  | 3.123138 |
| 6 | -3.917666 | -1.427742 | 3.123138 |
| 6 | -3.195294 | -2.678927 | 3.123138 |
| 6 | -0.722372 | -4.106669 | 3.123138 |
| 6 | 0.722372  | -4.106669 | 3.123138 |
| 6 | 3.195294  | -2.678927 | 3.123138 |
| 6 | 3.917666  | -1.427742 | 3.123138 |
| 6 | 2.682718  | 3.196690  | 1.874948 |
| 6 | 1.427056  | 3.921647  | 1.874948 |
| 6 | -1.427056 | 3.921647  | 1.874948 |
| 6 | -2.682718 | 3.196690  | 1.874948 |
| 6 | -4.109774 | 0.724957  | 1.874948 |
| 6 | -4.109774 | -0.724957 | 1.874948 |
| 6 | -2.682718 | -3.196690 | 1.874948 |
| 6 | -1.427056 | -3.921647 | 1.874948 |
| 6 | 1.427056  | -3.921647 | 1.874948 |
| 6 | 2.682718  | -3.196690 | 1.874948 |
| 6 | 4.109774  | -0.724957 | 1.874948 |
| 6 | 4.109774  | 0.724957  | 1.874948 |
| 6 | 0.722099  | 4.106262  | 0.626572 |
| 6 | -0.722099 | 4.106262  | 0.626572 |
| 6 | -3.195078 | 2.678487  | 0.626572 |
| 6 | -3.917177 | 1.427775  | 0.626572 |
| 6 | -3.917177 | -1.427775 | 0.626572 |
| 6 | -3.195078 | -2.678487 | 0.626572 |
| 6 | -0.722099 | -4.106262 | 0.626572 |
| 6 | 0.722099  | -4.106262 | 0.626572 |
| 6 | 3.195078  | -2.678487 | 0.626572 |

|   |           |           |           |
|---|-----------|-----------|-----------|
| 6 | 3.917177  | -1.427775 | 0.626572  |
| 6 | 3.917177  | 1.427775  | 0.626572  |
| 6 | 3.195078  | 2.678487  | 0.626572  |
| 6 | -1.427775 | 3.917177  | -0.626572 |
| 6 | -2.678487 | 3.195078  | -0.626572 |
| 6 | -4.106262 | 0.722099  | -0.626572 |
| 6 | -4.106262 | -0.722099 | -0.626572 |
| 6 | -2.678487 | -3.195078 | -0.626572 |
| 6 | -1.427775 | -3.917177 | -0.626572 |
| 6 | 1.427775  | -3.917177 | -0.626572 |
| 6 | 2.678487  | -3.195078 | -0.626572 |
| 6 | 4.106262  | -0.722099 | -0.626572 |
| 6 | 4.106262  | 0.722099  | -0.626572 |
| 6 | 2.678487  | 3.195078  | -0.626572 |
| 6 | 1.427775  | 3.917177  | -0.626572 |
| 6 | -3.196690 | 2.682718  | -1.874948 |
| 6 | -3.921647 | 1.427056  | -1.874948 |
| 6 | -3.921647 | -1.427056 | -1.874948 |
| 6 | -3.196690 | -2.682718 | -1.874948 |
| 6 | -0.724957 | -4.109774 | -1.874948 |
| 6 | 0.724957  | -4.109774 | -1.874948 |
| 6 | 3.196690  | -2.682718 | -1.874948 |
| 6 | 3.921647  | -1.427056 | -1.874948 |
| 6 | 3.921647  | 1.427056  | -1.874948 |
| 6 | 3.196690  | 2.682718  | -1.874948 |
| 6 | 0.724957  | 4.109774  | -1.874948 |
| 6 | -0.724957 | 4.109774  | -1.874948 |
| 6 | -4.106669 | 0.722372  | -3.123138 |
| 6 | -4.106669 | -0.722372 | -3.123138 |
| 6 | -2.678927 | -3.195294 | -3.123138 |
| 6 | -1.427742 | -3.917666 | -3.123138 |
| 6 | 1.427742  | -3.917666 | -3.123138 |
| 6 | 2.678927  | -3.195294 | -3.123138 |
| 6 | 4.106669  | -0.722372 | -3.123138 |
| 6 | 4.106669  | 0.722372  | -3.123138 |
| 6 | 2.678927  | 3.195294  | -3.123138 |
| 6 | 1.427742  | 3.917666  | -3.123138 |
| 6 | -1.427742 | 3.917666  | -3.123138 |
| 6 | -2.678927 | 3.195294  | -3.123138 |
| 6 | -3.917082 | -1.427875 | -4.376336 |
| 6 | -3.195117 | -2.678355 | -4.376336 |
| 6 | -0.721965 | -4.106230 | -4.376336 |
| 6 | 0.721965  | -4.106230 | -4.376336 |
| 6 | 3.195117  | -2.678355 | -4.376336 |
| 6 | 3.917082  | -1.427875 | -4.376336 |
| 6 | 3.917082  | 1.427875  | -4.376336 |
| 6 | 3.195117  | 2.678355  | -4.376336 |
| 6 | 0.721965  | 4.106230  | -4.376336 |
| 6 | -0.721965 | 4.106230  | -4.376336 |
| 6 | -3.195117 | 2.678355  | -4.376336 |
| 6 | -3.917082 | 1.427875  | -4.376336 |
| 6 | -2.682678 | -3.196717 | -5.625285 |
| 6 | -1.427099 | -3.921625 | -5.625285 |
| 6 | 1.427099  | -3.921625 | -5.625285 |
| 6 | 2.682678  | -3.196717 | -5.625285 |
| 6 | 4.109777  | -0.724909 | -5.625285 |
| 6 | 4.109777  | 0.724909  | -5.625285 |
| 6 | 2.682678  | 3.196717  | -5.625285 |
| 6 | 1.427099  | 3.921625  | -5.625285 |
| 6 | -1.427099 | 3.921625  | -5.625285 |
| 6 | -2.682678 | 3.196717  | -5.625285 |
| 6 | -4.109777 | 0.724909  | -5.625285 |
| 6 | -4.109777 | -0.724909 | -5.625285 |
| 6 | -0.722585 | -4.106948 | -6.873179 |
| 6 | 0.722585  | -4.106948 | -6.873179 |
| 6 | 3.195428  | -2.679251 | -6.873179 |
| 6 | 3.918014  | -1.427697 | -6.873179 |
| 6 | 3.918014  | 1.427697  | -6.873179 |
| 6 | 3.195428  | 2.679251  | -6.873179 |
| 6 | 0.722585  | 4.106948  | -6.873179 |

|   |           |           |            |
|---|-----------|-----------|------------|
| 6 | -0.722585 | 4.106948  | -6.873179  |
| 6 | -3.195428 | 2.679251  | -6.873179  |
| 6 | -3.918014 | 1.427697  | -6.873179  |
| 6 | -3.918014 | -1.427697 | -6.873179  |
| 6 | -3.195428 | -2.679251 | -6.873179  |
| 6 | 1.427929  | -3.916808 | -8.126358  |
| 6 | 2.678091  | -3.195027 | -8.126358  |
| 6 | 4.106020  | -0.721782 | -8.126358  |
| 6 | 4.106020  | 0.721782  | -8.126358  |
| 6 | 2.678091  | 3.195027  | -8.126358  |
| 6 | 1.427929  | 3.916808  | -8.126358  |
| 6 | -1.427929 | 3.916808  | -8.126358  |
| 6 | -2.678091 | 3.195027  | -8.126358  |
| 6 | -4.106020 | 0.721782  | -8.126358  |
| 6 | -4.106020 | -0.721782 | -8.126358  |
| 6 | -2.678091 | -3.195027 | -8.126358  |
| 6 | -1.427929 | -3.916808 | -8.126358  |
| 6 | 3.196682  | -2.682656 | -9.375708  |
| 6 | 3.921589  | -1.427080 | -9.375708  |
| 6 | 3.921589  | 1.427080  | -9.375708  |
| 6 | 3.196682  | 2.682656  | -9.375708  |
| 6 | 0.724907  | 4.109735  | -9.375708  |
| 6 | -0.724907 | 4.109735  | -9.375708  |
| 6 | -3.196682 | 2.682656  | -9.375708  |
| 6 | -3.921589 | 1.427080  | -9.375708  |
| 6 | -3.921589 | -1.427080 | -9.375708  |
| 6 | -3.196682 | -2.682656 | -9.375708  |
| 6 | -0.724907 | -4.109735 | -9.375708  |
| 6 | 0.724907  | -4.109735 | -9.375708  |
| 6 | 4.107138  | -0.722816 | -10.623239 |
| 6 | 4.107138  | 0.722816  | -10.623239 |
| 6 | 2.679546  | 3.195478  | -10.623239 |
| 6 | 1.427592  | 3.918294  | -10.623239 |
| 6 | -1.427592 | 3.918294  | -10.623239 |
| 6 | -2.679546 | 3.195478  | -10.623239 |
| 6 | -4.107138 | 0.722816  | -10.623239 |
| 6 | -4.107138 | -0.722816 | -10.623239 |
| 6 | -2.679546 | -3.195478 | -10.623239 |
| 6 | -1.427592 | -3.918294 | -10.623239 |
| 6 | 1.427592  | -3.918294 | -10.623239 |
| 6 | 2.679546  | -3.195478 | -10.623239 |
| 6 | 3.916365  | 1.427945  | -11.876334 |
| 6 | 3.194820  | 2.677699  | -11.876334 |
| 6 | 0.721546  | 4.105645  | -11.876334 |
| 6 | -0.721546 | 4.105645  | -11.876334 |
| 6 | -3.194820 | 2.677699  | -11.876334 |
| 6 | -3.916365 | 1.427945  | -11.876334 |
| 6 | -3.916365 | -1.427945 | -11.876334 |
| 6 | -3.194820 | -2.677699 | -11.876334 |
| 6 | -0.721546 | -4.105645 | -11.876334 |
| 6 | 0.721546  | -4.105645 | -11.876334 |
| 6 | 3.194820  | -2.677699 | -11.876334 |
| 6 | 3.916365  | -1.427945 | -11.876334 |
| 6 | 2.682472  | 3.196547  | -13.126054 |
| 6 | 1.427055  | 3.921362  | -13.126054 |
| 6 | -1.427055 | 3.921362  | -13.126054 |
| 6 | -2.682472 | 3.196547  | -13.126054 |
| 6 | -4.109527 | 0.724816  | -13.126054 |
| 6 | -4.109527 | -0.724816 | -13.126054 |
| 6 | -2.682472 | -3.196547 | -13.126054 |
| 6 | -1.427055 | -3.921362 | -13.126054 |
| 6 | 1.427055  | -3.921362 | -13.126054 |
| 6 | 2.682472  | -3.196547 | -13.126054 |
| 6 | 4.109527  | -0.724816 | -13.126054 |
| 6 | 4.109527  | 0.724816  | -13.126054 |
| 6 | 0.723013  | 4.107238  | -14.373173 |
| 6 | -0.723013 | 4.107238  | -14.373173 |
| 6 | -3.195466 | 2.679767  | -14.373173 |
| 6 | -3.918479 | 1.427471  | -14.373173 |
| 6 | -3.918479 | -1.427471 | -14.373173 |

|   |           |           |            |
|---|-----------|-----------|------------|
| 6 | -3.195466 | -2.679767 | -14.373173 |
| 6 | -0.723013 | -4.107238 | -14.373173 |
| 6 | 0.723013  | -4.107238 | -14.373173 |
| 6 | 3.195466  | -2.679767 | -14.373173 |
| 6 | 3.918479  | -1.427471 | -14.373173 |
| 6 | 3.918479  | 1.427471  | -14.373173 |
| 6 | 3.195466  | 2.679767  | -14.373173 |
| 6 | -1.427934 | 3.915884  | -15.626152 |
| 6 | -2.677288 | 3.194570  | -15.626152 |
| 6 | -4.105222 | 0.721315  | -15.626152 |
| 6 | -4.105222 | -0.721315 | -15.626152 |
| 6 | -2.677288 | -3.194570 | -15.626152 |
| 6 | -1.427934 | -3.915884 | -15.626152 |
| 6 | 1.427934  | -3.915884 | -15.626152 |
| 6 | 2.677288  | -3.194570 | -15.626152 |
| 6 | 4.105222  | -0.721315 | -15.626152 |
| 6 | 4.105222  | 0.721315  | -15.626152 |
| 6 | 2.677288  | 3.194570  | -15.626152 |
| 6 | 1.427934  | 3.915884  | -15.626152 |
| 6 | -3.196391 | 2.682339  | -16.876284 |
| 6 | -3.921169 | 1.426986  | -16.876284 |
| 6 | -3.921169 | -1.426986 | -16.876284 |
| 6 | -3.196391 | -2.682339 | -16.876284 |
| 6 | -0.724778 | -4.109325 | -16.876284 |
| 6 | 0.724778  | -4.109325 | -16.876284 |
| 6 | 3.196391  | -2.682339 | -16.876284 |
| 6 | 3.921169  | -1.426986 | -16.876284 |
| 6 | 3.921169  | 1.426986  | -16.876284 |
| 6 | 3.196391  | 2.682339  | -16.876284 |
| 6 | 0.724778  | 4.109325  | -16.876284 |
| 6 | -0.724778 | 4.109325  | -16.876284 |
| 6 | -4.107385 | 0.723268  | -18.122964 |
| 6 | -4.107385 | -0.723268 | -18.122964 |
| 6 | -2.680061 | -3.195466 | -18.122964 |
| 6 | -1.427324 | -3.918734 | -18.122964 |
| 6 | 1.427324  | -3.918734 | -18.122964 |
| 6 | 2.680061  | -3.195466 | -18.122964 |
| 6 | 4.107385  | -0.723268 | -18.122964 |
| 6 | 4.107385  | 0.723268  | -18.122964 |
| 6 | 2.680061  | 3.195466  | -18.122964 |
| 6 | 1.427324  | 3.918734  | -18.122964 |
| 6 | -1.427324 | 3.918734  | -18.122964 |
| 6 | -2.680061 | 3.195466  | -18.122964 |
| 6 | -3.915354 | -1.427958 | -19.375816 |
| 6 | -3.194325 | -2.676817 | -19.375816 |
| 6 | -0.721029 | -4.104775 | -19.375816 |
| 6 | 0.721029  | -4.104775 | -19.375816 |
| 6 | 3.194325  | -2.676817 | -19.375816 |
| 6 | 3.915354  | -1.427958 | -19.375816 |
| 6 | 3.915354  | 1.427958  | -19.375816 |
| 6 | 3.194325  | 2.676817  | -19.375816 |
| 6 | 0.721029  | 4.104775  | -19.375816 |
| 6 | -0.721029 | 4.104775  | -19.375816 |
| 6 | -3.194325 | 2.676817  | -19.375816 |
| 6 | -3.915354 | 1.427958  | -19.375816 |
| 6 | -2.682174 | -3.196291 | -20.626430 |
| 6 | -1.426982 | -3.920977 | -20.626430 |
| 6 | 1.426982  | -3.920977 | -20.626430 |
| 6 | 2.682174  | -3.196291 | -20.626430 |
| 6 | 4.109157  | -0.724685 | -20.626430 |
| 6 | 4.109157  | 0.724685  | -20.626430 |
| 6 | 2.682174  | 3.196291  | -20.626430 |
| 6 | 1.426982  | 3.920977  | -20.626430 |
| 6 | -1.426982 | 3.920977  | -20.626430 |
| 6 | -2.682174 | 3.196291  | -20.626430 |
| 6 | -4.109157 | 0.724685  | -20.626430 |
| 6 | -4.109157 | -0.724685 | -20.626430 |
| 6 | -0.723567 | -4.107686 | -21.872636 |
| 6 | 0.723567  | -4.107686 | -21.872636 |
| 6 | 3.195577  | -2.680470 | -21.872636 |



|   |           |           |            |
|---|-----------|-----------|------------|
| 6 | 3.919143  | -1.427216 | -21.872636 |
| 6 | 3.919143  | 1.427216  | -21.872636 |
| 6 | 3.195577  | 2.680470  | -21.872636 |
| 6 | 0.723567  | 4.107686  | -21.872636 |
| 6 | -0.723567 | 4.107686  | -21.872636 |
| 6 | -3.195577 | 2.680470  | -21.872636 |
| 6 | -3.919143 | 1.427216  | -21.872636 |
| 6 | -3.919143 | -1.427216 | -21.872636 |
| 6 | -3.195577 | -2.680470 | -21.872636 |
| 6 | 1.428020  | -3.914904 | -23.125379 |
| 6 | 2.676396  | -3.194153 | -23.125379 |
| 6 | 4.104416  | -0.720750 | -23.125379 |
| 6 | 4.104416  | 0.720750  | -23.125379 |
| 6 | 2.676396  | 3.194153  | -23.125379 |
| 6 | 1.428020  | 3.914904  | -23.125379 |
| 6 | -1.428020 | 3.914904  | -23.125379 |
| 6 | -2.676396 | 3.194153  | -23.125379 |
| 6 | -4.104416 | 0.720750  | -23.125379 |
| 6 | -4.104416 | -0.720750 | -23.125379 |
| 6 | -2.676396 | -3.194153 | -23.125379 |
| 6 | -1.428020 | -3.914904 | -23.125379 |
| 6 | 3.196263  | -2.682140 | -24.376660 |
| 6 | 3.920932  | -1.426975 | -24.376660 |
| 6 | 3.920932  | 1.426975  | -24.376660 |
| 6 | 3.196263  | 2.682140  | -24.376660 |
| 6 | 0.724670  | 4.109114  | -24.376660 |
| 6 | -0.724670 | 4.109114  | -24.376660 |
| 6 | -3.196263 | 2.682140  | -24.376660 |
| 6 | -3.920932 | 1.426975  | -24.376660 |
| 6 | -3.920932 | -1.426975 | -24.376660 |
| 6 | -3.196263 | -2.682140 | -24.376660 |
| 6 | -0.724670 | -4.109114 | -24.376660 |
| 6 | 0.724670  | -4.109114 | -24.376660 |
| 6 | 4.108149  | -0.723980 | -25.622324 |
| 6 | 4.108149  | 0.723980  | -25.622324 |
| 6 | 2.681059  | 3.195771  | -25.622324 |
| 6 | 1.427090  | 3.919751  | -25.622324 |
| 6 | -1.427090 | 3.919751  | -25.622324 |
| 6 | -2.681059 | 3.195771  | -25.622324 |
| 6 | -4.108149 | 0.723980  | -25.622324 |
| 6 | -4.108149 | -0.723980 | -25.622324 |
| 6 | -2.681059 | -3.195771 | -25.622324 |
| 6 | -1.427090 | -3.919751 | -25.622324 |
| 6 | 1.427090  | -3.919751 | -25.622324 |
| 6 | 2.681059  | -3.195771 | -25.622324 |
| 6 | 3.914292  | 1.428179  | -26.874959 |
| 6 | 3.193986  | 2.675787  | -26.874959 |
| 6 | 0.720306  | 4.103966  | -26.874959 |
| 6 | -0.720306 | 4.103966  | -26.874959 |
| 6 | -3.193986 | 2.675787  | -26.874959 |
| 6 | -3.914292 | 1.428179  | -26.874959 |
| 6 | -3.914292 | -1.428179 | -26.874959 |
| 6 | -3.193986 | -2.675787 | -26.874959 |
| 6 | -0.720306 | -4.103966 | -26.874959 |
| 6 | 0.720306  | -4.103966 | -26.874959 |
| 6 | 3.193986  | -2.675787 | -26.874959 |
| 6 | 3.914292  | -1.428179 | -26.874959 |
| 6 | 2.682254  | 3.196472  | -28.127223 |
| 6 | 1.427099  | 3.921136  | -28.127223 |
| 6 | -1.427099 | 3.921136  | -28.127223 |
| 6 | -2.682254 | 3.196472  | -28.127223 |
| 6 | -4.109353 | 0.724664  | -28.127223 |
| 6 | -4.109353 | -0.724664 | -28.127223 |
| 6 | -2.682254 | -3.196472 | -28.127223 |
| 6 | -1.427099 | -3.921136 | -28.127223 |
| 6 | 1.427099  | -3.921136 | -28.127223 |
| 6 | 2.682254  | -3.196472 | -28.127223 |
| 6 | 4.109353  | -0.724664 | -28.127223 |
| 6 | 4.109353  | 0.724664  | -28.127223 |
| 6 | 0.724738  | 4.109601  | -29.372023 |

|   |           |           |            |
|---|-----------|-----------|------------|
| 6 | -0.724738 | 4.109601  | -29.372023 |
| 6 | -3.196650 | 2.682442  | -29.372023 |
| 6 | -3.921388 | 1.427159  | -29.372023 |
| 6 | -3.921388 | -1.427159 | -29.372023 |
| 6 | -3.196650 | -2.682442 | -29.372023 |
| 6 | -0.724738 | -4.109601 | -29.372023 |
| 6 | 0.724738  | -4.109601 | -29.372023 |
| 6 | 3.196650  | -2.682442 | -29.372023 |
| 6 | 3.921388  | -1.427159 | -29.372023 |
| 6 | 3.921388  | 1.427159  | -29.372023 |
| 6 | 3.196650  | 2.682442  | -29.372023 |
| 6 | -1.428765 | 3.913916  | -30.624312 |
| 6 | -2.675168 | 3.194304  | -30.624312 |
| 6 | -4.103933 | 0.719611  | -30.624312 |
| 6 | -4.103933 | -0.719611 | -30.624312 |
| 6 | -2.675168 | -3.194304 | -30.624312 |
| 6 | -1.428765 | -3.913916 | -30.624312 |
| 6 | 1.428765  | -3.913916 | -30.624312 |
| 6 | 2.675168  | -3.194304 | -30.624312 |
| 6 | 4.103933  | -0.719611 | -30.624312 |
| 6 | 4.103933  | 0.719611  | -30.624312 |
| 6 | 2.675168  | 3.194304  | -30.624312 |
| 6 | 1.428765  | 3.913916  | -30.624312 |
| 6 | -3.195788 | 2.681684  | -31.878348 |
| 6 | -3.920301 | 1.426791  | -31.878348 |
| 6 | -3.920301 | -1.426791 | -31.878348 |
| 6 | -3.195788 | -2.681684 | -31.878348 |
| 6 | -0.724513 | -4.108476 | -31.878348 |
| 6 | 0.724513  | -4.108476 | -31.878348 |
| 6 | 3.195788  | -2.681684 | -31.878348 |
| 6 | 3.920301  | -1.426791 | -31.878348 |
| 6 | 3.920301  | 1.426791  | -31.878348 |
| 6 | 3.195788  | 2.681684  | -31.878348 |
| 6 | 0.724513  | 4.108476  | -31.878348 |
| 6 | -0.724513 | 4.108476  | -31.878348 |
| 6 | -4.105294 | 0.725189  | -33.121440 |
| 6 | -4.105294 | -0.725189 | -33.121440 |
| 6 | -2.680679 | -3.192694 | -33.121440 |
| 6 | -1.424615 | -3.917883 | -33.121440 |
| 6 | 1.424615  | -3.917883 | -33.121440 |
| 6 | 2.680679  | -3.192694 | -33.121440 |
| 6 | 4.105294  | -0.725189 | -33.121440 |
| 6 | 4.105294  | 0.725189  | -33.121440 |
| 6 | 2.680679  | 3.192694  | -33.121440 |
| 6 | 1.424615  | 3.917883  | -33.121440 |
| 6 | -1.424615 | 3.917883  | -33.121440 |
| 6 | -2.680679 | 3.192694  | -33.121440 |
| 6 | -3.898424 | -1.424278 | -34.373317 |
| 6 | -3.182672 | -2.663995 | -34.373317 |
| 6 | -0.715751 | -4.088273 | -34.373317 |
| 6 | 0.715751  | -4.088273 | -34.373317 |
| 6 | 3.182672  | -2.663995 | -34.373317 |
| 6 | 3.898424  | -1.424278 | -34.373317 |
| 6 | 3.898424  | 1.424278  | -34.373317 |
| 6 | 3.182672  | 2.663995  | -34.373317 |
| 6 | 0.715751  | 4.088273  | -34.373317 |
| 6 | -0.715751 | 4.088273  | -34.373317 |
| 6 | -3.182672 | 2.663995  | -34.373317 |
| 6 | -3.898424 | 1.424278  | -34.373317 |
| 6 | -2.677414 | -3.186154 | -35.635582 |
| 6 | -1.420584 | -3.911786 | -35.635582 |
| 6 | 1.420584  | -3.911786 | -35.635582 |
| 6 | 2.677414  | -3.186154 | -35.635582 |
| 6 | 4.097998  | -0.725631 | -35.635582 |
| 6 | 4.097998  | 0.725631  | -35.635582 |
| 6 | 2.677414  | 3.186154  | -35.635582 |
| 6 | 1.420584  | 3.911786  | -35.635582 |
| 6 | -1.420584 | 3.911786  | -35.635582 |
| 6 | -2.677414 | 3.186154  | -35.635582 |
| 6 | -4.097998 | 0.725631  | -35.635582 |

|   |           |           |            |
|---|-----------|-----------|------------|
| 6 | -4.097998 | -0.725631 | -35.635582 |
| 6 | -0.736273 | -4.149828 | -36.875742 |
| 6 | 0.736273  | -4.149828 | -36.875742 |
| 6 | 3.225720  | -2.712545 | -36.875742 |
| 6 | 3.961993  | -1.437283 | -36.875742 |
| 6 | 3.961993  | 1.437283  | -36.875742 |
| 6 | 3.225720  | 2.712545  | -36.875742 |
| 6 | 0.736273  | 4.149828  | -36.875742 |
| 6 | -0.736273 | 4.149828  | -36.875742 |
| 6 | -3.225720 | 2.712545  | -36.875742 |
| 6 | -3.961993 | 1.437283  | -36.875742 |
| 6 | -3.961993 | -1.437283 | -36.875742 |
| 6 | -3.225720 | -2.712545 | -36.875742 |
| 6 | 1.506940  | -3.995758 | -38.089587 |
| 6 | 2.706958  | -3.302927 | -38.089587 |
| 6 | 4.213897  | -0.692831 | -38.089587 |
| 6 | 4.213897  | 0.692831  | -38.089587 |
| 6 | 2.706958  | 3.302927  | -38.089587 |
| 6 | 1.506940  | 3.995758  | -38.089587 |
| 6 | -1.506940 | 3.995758  | -38.089587 |
| 6 | -2.706958 | 3.302927  | -38.089587 |
| 6 | -4.213897 | 0.692831  | -38.089587 |
| 6 | -4.213897 | -0.692831 | -38.089587 |
| 6 | -2.706958 | -3.302927 | -38.089587 |
| 6 | -1.506940 | -3.995758 | -38.089587 |
| 1 | -1.226554 | -4.274195 | 39.046903  |
| 1 | 1.226554  | -4.274195 | 39.046903  |
| 1 | 3.088284  | -3.199325 | 39.046903  |
| 1 | 4.314838  | -1.074870 | 39.046903  |
| 1 | 4.314838  | 1.074870  | 39.046903  |
| 1 | 3.088284  | 3.199325  | 39.046903  |
| 1 | 1.226554  | 4.274195  | 39.046903  |
| 1 | -1.226554 | 4.274195  | 39.046903  |
| 1 | -3.088284 | 3.199325  | 39.046903  |
| 1 | -4.314838 | 1.074870  | 39.046903  |
| 1 | -4.314838 | -1.074870 | 39.046903  |
| 1 | -3.088284 | -3.199325 | 39.046903  |
| 1 | 1.074870  | -4.314838 | -39.046903 |
| 1 | 3.199325  | -3.088284 | -39.046903 |
| 1 | 4.274195  | -1.226554 | -39.046903 |
| 1 | 4.274195  | 1.226554  | -39.046903 |
| 1 | 3.199325  | 3.088284  | -39.046903 |
| 1 | 1.074870  | 4.314838  | -39.046903 |
| 1 | -1.074870 | 4.314838  | -39.046903 |
| 1 | -3.199325 | 3.088284  | -39.046903 |
| 1 | -4.274195 | 1.226554  | -39.046903 |
| 1 | -4.274195 | -1.226554 | -39.046903 |
| 1 | -3.199325 | -3.088284 | -39.046903 |
| 1 | -1.074870 | -4.314838 | -39.046903 |

Nanotube (6,6) u31v6s  
B3LYP/STO-3G Energy: -28475.855573

|   |           |           |           |
|---|-----------|-----------|-----------|
| 6 | -2.706163 | -3.302990 | 38.718473 |
| 6 | -1.507392 | -3.995101 | 38.718473 |
| 6 | 1.507392  | -3.995101 | 38.718473 |
| 6 | 2.706163  | -3.302990 | 38.718473 |
| 6 | 4.213555  | -0.692111 | 38.718473 |
| 6 | 4.213555  | 0.692111  | 38.718473 |
| 6 | 2.706163  | 3.302990  | 38.718473 |
| 6 | 1.507392  | 3.995101  | 38.718473 |
| 6 | -1.507392 | 3.995101  | 38.718473 |
| 6 | -2.706163 | 3.302990  | 38.718473 |
| 6 | -4.213555 | 0.692111  | 38.718473 |
| 6 | -4.213555 | -0.692111 | 38.718473 |
| 6 | -0.735360 | -4.148109 | 37.503516 |
| 6 | 0.735360  | -4.148109 | 37.503516 |
| 6 | 3.224688  | -2.710895 | 37.503516 |

|   |           |           |           |
|---|-----------|-----------|-----------|
| 6 | 3.960047  | -1.437214 | 37.503516 |
| 6 | 3.960047  | 1.437214  | 37.503516 |
| 6 | 3.224688  | 2.710895  | 37.503516 |
| 6 | 0.735360  | 4.148109  | 37.503516 |
| 6 | -0.735360 | 4.148109  | 37.503516 |
| 6 | -3.224688 | 2.710895  | 37.503516 |
| 6 | -3.960047 | 1.437214  | 37.503516 |
| 6 | -3.960047 | -1.437214 | 37.503516 |
| 6 | -3.224688 | -2.710895 | 37.503516 |
| 6 | 1.420492  | -3.912063 | 36.263379 |
| 6 | 2.677700  | -3.186213 | 36.263379 |
| 6 | 4.098191  | -0.725850 | 36.263379 |
| 6 | 4.098191  | 0.725850  | 36.263379 |
| 6 | 2.677700  | 3.186213  | 36.263379 |
| 6 | 1.420492  | 3.912063  | 36.263379 |
| 6 | -1.420492 | 3.912063  | 36.263379 |
| 6 | -2.677700 | 3.186213  | 36.263379 |
| 6 | -4.098191 | 0.725850  | 36.263379 |
| 6 | -4.098191 | -0.725850 | 36.263379 |
| 6 | -2.677700 | -3.186213 | 36.263379 |
| 6 | -1.420492 | -3.912063 | 36.263379 |
| 6 | 3.182134  | -2.663297 | 35.001870 |
| 6 | 3.897550  | -1.424160 | 35.001870 |
| 6 | 3.897550  | 1.424160  | 35.001870 |
| 6 | 3.182134  | 2.663297  | 35.001870 |
| 6 | 0.715416  | 4.087457  | 35.001870 |
| 6 | -0.715416 | 4.087457  | 35.001870 |
| 6 | -3.182134 | 2.663297  | 35.001870 |
| 6 | -3.897550 | 1.424160  | 35.001870 |
| 6 | -3.897550 | -1.424160 | 35.001870 |
| 6 | -3.182134 | -2.663297 | 35.001870 |
| 6 | -0.715416 | -4.087457 | 35.001870 |
| 6 | 0.715416  | -4.087457 | 35.001870 |
| 6 | 4.103876  | -0.724213 | 33.748755 |
| 6 | 4.103876  | 0.724213  | 33.748755 |
| 6 | 2.679125  | 3.191955  | 33.748755 |
| 6 | 1.424751  | 3.916168  | 33.748755 |
| 6 | -1.424751 | 3.916168  | 33.748755 |
| 6 | -2.679125 | 3.191955  | 33.748755 |
| 6 | -4.103876 | 0.724213  | 33.748755 |
| 6 | -4.103876 | -0.724213 | 33.748755 |
| 6 | -2.679125 | -3.191955 | 33.748755 |
| 6 | -1.424751 | -3.916168 | 33.748755 |
| 6 | 1.424751  | -3.916168 | 33.748755 |
| 6 | 2.679125  | -3.191955 | 33.748755 |
| 6 | 3.920393  | 1.426496  | 32.505480 |
| 6 | 3.195578  | 2.681912  | 32.505480 |
| 6 | 0.724815  | 4.108408  | 32.505480 |
| 6 | -0.724815 | 4.108408  | 32.505480 |
| 6 | -3.195578 | 2.681912  | 32.505480 |
| 6 | -3.920393 | 1.426496  | 32.505480 |
| 6 | -3.920393 | -1.426496 | 32.505480 |
| 6 | -3.195578 | -2.681912 | 32.505480 |
| 6 | -0.724815 | -4.108408 | 32.505480 |
| 6 | 0.724815  | -4.108408 | 32.505480 |
| 6 | 3.195578  | -2.681912 | 32.505480 |
| 6 | 3.920393  | -1.426496 | 32.505480 |
| 6 | 2.674559  | 3.193968  | 31.252453 |
| 6 | 1.428778  | 3.913220  | 31.252453 |
| 6 | -1.428778 | 3.913220  | 31.252453 |
| 6 | -2.674559 | 3.193968  | 31.252453 |
| 6 | -4.103337 | 0.719252  | 31.252453 |
| 6 | -4.103337 | -0.719252 | 31.252453 |
| 6 | -2.674559 | -3.193968 | 31.252453 |
| 6 | -1.428778 | -3.913220 | 31.252453 |
| 6 | 1.428778  | -3.913220 | 31.252453 |
| 6 | 2.674559  | -3.193968 | 31.252453 |
| 6 | 4.103337  | -0.719252 | 31.252453 |
| 6 | 4.103337  | 0.719252  | 31.252453 |
| 6 | 0.723646  | 4.107987  | 29.998929 |

|   |           |           |           |
|---|-----------|-----------|-----------|
| 6 | -0.723646 | 4.107987  | 29.998929 |
| 6 | -3.195798 | 2.680689  | 29.998929 |
| 6 | -3.919444 | 1.427298  | 29.998929 |
| 6 | -3.919444 | -1.427298 | 29.998929 |
| 6 | -3.195798 | -2.680689 | 29.998929 |
| 6 | -0.723646 | -4.107987 | 29.998929 |
| 6 | 0.723646  | -4.107987 | 29.998929 |
| 6 | 3.195798  | -2.680689 | 29.998929 |
| 6 | 3.919444  | -1.427298 | 29.998929 |
| 6 | 3.919444  | 1.427298  | 29.998929 |
| 6 | 3.195798  | 2.680689  | 29.998929 |
| 6 | -1.426947 | 3.921486  | 28.753644 |
| 6 | -2.682633 | 3.196515  | 28.753644 |
| 6 | -4.109580 | 0.724971  | 28.753644 |
| 6 | -4.109580 | -0.724971 | 28.753644 |
| 6 | -2.682633 | -3.196515 | 28.753644 |
| 6 | -1.426947 | -3.921486 | 28.753644 |
| 6 | 1.426947  | -3.921486 | 28.753644 |
| 6 | 2.682633  | -3.196515 | 28.753644 |
| 6 | 4.109580  | -0.724971 | 28.753644 |
| 6 | 4.109580  | 0.724971  | 28.753644 |
| 6 | 2.682633  | 3.196515  | 28.753644 |
| 6 | 1.426947  | 3.921486  | 28.753644 |
| 6 | -3.193801 | 2.675590  | 27.502662 |
| 6 | -3.914030 | 1.428118  | 27.502662 |
| 6 | -3.914030 | -1.428118 | 27.502662 |
| 6 | -3.193801 | -2.675590 | 27.502662 |
| 6 | -0.720229 | -4.103708 | 27.502662 |
| 6 | 0.720229  | -4.103708 | 27.502662 |
| 6 | 3.193801  | -2.675590 | 27.502662 |
| 6 | 3.914030  | -1.428118 | 27.502662 |
| 6 | 3.914030  | 1.428118  | 27.502662 |
| 6 | 3.193801  | 2.675590  | 27.502662 |
| 6 | 0.720229  | 4.103708  | 27.502662 |
| 6 | -0.720229 | 4.103708  | 27.502662 |
| 6 | -4.106544 | 0.722748  | 26.248819 |
| 6 | -4.106544 | -0.722748 | 26.248819 |
| 6 | -2.679191 | -3.194997 | 26.248819 |
| 6 | -1.427354 | -3.917746 | 26.248819 |
| 6 | 1.427354  | -3.917746 | 26.248819 |
| 6 | 2.679191  | -3.194997 | 26.248819 |
| 6 | 4.106544  | -0.722748 | 26.248819 |
| 6 | 4.106544  | 0.722748  | 26.248819 |
| 6 | 2.679191  | 3.194997  | 26.248819 |
| 6 | 1.427354  | 3.917746  | 26.248819 |
| 6 | -1.427354 | 3.917746  | 26.248819 |
| 6 | -2.679191 | 3.194997  | 26.248819 |
| 6 | -3.921267 | -1.426855 | 25.002373 |
| 6 | -3.196327 | -2.682489 | 25.002373 |
| 6 | -0.724941 | -4.109345 | 25.002373 |
| 6 | 0.724941  | -4.109345 | 25.002373 |
| 6 | 3.196327  | -2.682489 | 25.002373 |
| 6 | 3.921267  | -1.426855 | 25.002373 |
| 6 | 3.921267  | 1.426855  | 25.002373 |
| 6 | 3.196327  | 2.682489  | 25.002373 |
| 6 | 0.724941  | 4.109345  | 25.002373 |
| 6 | -0.724941 | 4.109345  | 25.002373 |
| 6 | -3.196327 | 2.682489  | 25.002373 |
| 6 | -3.921267 | 1.426855  | 25.002373 |
| 6 | -2.676498 | -3.194151 | 23.752593 |
| 6 | -1.427967 | -3.914991 | 23.752593 |
| 6 | 1.427967  | -3.914991 | 23.752593 |
| 6 | 2.676498  | -3.194151 | 23.752593 |
| 6 | 4.104465  | -0.720840 | 23.752593 |
| 6 | 4.104465  | 0.720840  | 23.752593 |
| 6 | 2.676498  | 3.194151  | 23.752593 |
| 6 | 1.427967  | 3.914991  | 23.752593 |
| 6 | -1.427967 | 3.914991  | 23.752593 |
| 6 | -2.676498 | 3.194151  | 23.752593 |
| 6 | -4.104465 | 0.720840  | 23.752593 |

|   |           |           |           |
|---|-----------|-----------|-----------|
| 6 | -4.104465 | -0.720840 | 23.752593 |
| 6 | -0.722219 | -4.105992 | 22.498765 |
| 6 | 0.722219  | -4.105992 | 22.498765 |
| 6 | 3.194784  | -2.678456 | 22.498765 |
| 6 | 3.917003  | -1.427536 | 22.498765 |
| 6 | 3.917003  | 1.427536  | 22.498765 |
| 6 | 3.194784  | 2.678456  | 22.498765 |
| 6 | 0.722219  | 4.105992  | 22.498765 |
| 6 | -0.722219 | 4.105992  | 22.498765 |
| 6 | -3.194784 | 2.678456  | 22.498765 |
| 6 | -3.917003 | 1.427536  | 22.498765 |
| 6 | -3.917003 | -1.427536 | 22.498765 |
| 6 | -3.194784 | -2.678456 | 22.498765 |
| 6 | 1.426885  | -3.921228 | 21.251415 |
| 6 | 2.682440  | -3.196333 | 21.251415 |
| 6 | 4.109326  | -0.724895 | 21.251415 |
| 6 | 4.109326  | 0.724895  | 21.251415 |
| 6 | 2.682440  | 3.196333  | 21.251415 |
| 6 | 1.426885  | 3.921228  | 21.251415 |
| 6 | -1.426885 | 3.921228  | 21.251415 |
| 6 | -2.682440 | 3.196333  | 21.251415 |
| 6 | -4.109326 | 0.724895  | 21.251415 |
| 6 | -4.109326 | -0.724895 | 21.251415 |
| 6 | -2.682440 | -3.196333 | 21.251415 |
| 6 | -1.426885 | -3.921228 | 21.251415 |
| 6 | 3.194445  | -2.677267 | 20.002498 |
| 6 | 3.915804  | -1.427838 | 20.002498 |
| 6 | 3.915804  | 1.427838  | 20.002498 |
| 6 | 3.194445  | 2.677267  | 20.002498 |
| 6 | 0.721358  | 4.105104  | 20.002498 |
| 6 | -0.721358 | 4.105104  | 20.002498 |
| 6 | -3.194445 | 2.677267  | 20.002498 |
| 6 | -3.915804 | 1.427838  | 20.002498 |
| 6 | -3.915804 | -1.427838 | 20.002498 |
| 6 | -3.194445 | -2.677267 | 20.002498 |
| 6 | -0.721358 | -4.105104 | 20.002498 |
| 6 | 0.721358  | -4.105104 | 20.002498 |
| 6 | 4.105532  | -0.721806 | 18.748798 |
| 6 | 4.105532  | 0.721806  | 18.748798 |
| 6 | 2.677868  | 3.194592  | 18.748798 |
| 6 | 1.427664  | 3.916398  | 18.748798 |
| 6 | -1.427664 | 3.916398  | 18.748798 |
| 6 | -2.677868 | 3.194592  | 18.748798 |
| 6 | -4.105532 | 0.721806  | 18.748798 |
| 6 | -4.105532 | -0.721806 | 18.748798 |
| 6 | -2.677868 | -3.194592 | 18.748798 |
| 6 | -1.427664 | -3.916398 | 18.748798 |
| 6 | 1.427664  | -3.916398 | 18.748798 |
| 6 | 2.677868  | -3.194592 | 18.748798 |
| 6 | 3.921078  | 1.426915  | 17.500633 |
| 6 | 3.196283  | 2.682296  | 17.500633 |
| 6 | 0.724795  | 4.109211  | 17.500633 |
| 6 | -0.724795 | 4.109211  | 17.500633 |
| 6 | -3.196283 | 2.682296  | 17.500633 |
| 6 | -3.921078 | 1.426915  | 17.500633 |
| 6 | -3.921078 | -1.426915 | 17.500633 |
| 6 | -3.196283 | -2.682296 | 17.500633 |
| 6 | -0.724795 | -4.109211 | 17.500633 |
| 6 | 0.724795  | -4.109211 | 17.500633 |
| 6 | 3.196283  | -2.682296 | 17.500633 |
| 6 | 3.921078  | -1.426915 | 17.500633 |
| 6 | 2.677966  | 3.194707  | 16.252387 |
| 6 | 1.427714  | 3.916540  | 16.252387 |
| 6 | -1.427714 | 3.916540  | 16.252387 |
| 6 | -2.677966 | 3.194707  | 16.252387 |
| 6 | -4.105680 | 0.721834  | 16.252387 |
| 6 | -4.105680 | -0.721834 | 16.252387 |
| 6 | -2.677966 | -3.194707 | 16.252387 |
| 6 | -1.427714 | -3.916540 | 16.252387 |
| 6 | 1.427714  | -3.916540 | 16.252387 |

|   |           |           |           |
|---|-----------|-----------|-----------|
| 6 | 2.677966  | -3.194707 | 16.252387 |
| 6 | 4.105680  | -0.721834 | 16.252387 |
| 6 | 4.105680  | 0.721834  | 16.252387 |
| 6 | 0.721478  | 4.105168  | 14.998916 |
| 6 | -0.721478 | 4.105168  | 14.998916 |
| 6 | -3.194441 | 2.677402  | 14.998916 |
| 6 | -3.915918 | 1.427766  | 14.998916 |
| 6 | -3.915918 | -1.427766 | 14.998916 |
| 6 | -3.194441 | -2.677402 | 14.998916 |
| 6 | -0.721478 | -4.105168 | 14.998916 |
| 6 | 0.721478  | -4.105168 | 14.998916 |
| 6 | 3.194441  | -2.677402 | 14.998916 |
| 6 | 3.915918  | -1.427766 | 14.998916 |
| 6 | 3.915918  | 1.427766  | 14.998916 |
| 6 | 3.194441  | 2.677402  | 14.998916 |
| 6 | -1.426959 | 3.920845  | 13.749980 |
| 6 | -2.682072 | 3.196206  | 13.749980 |
| 6 | -4.109031 | 0.724640  | 13.749980 |
| 6 | -4.109031 | -0.724640 | 13.749980 |
| 6 | -2.682072 | -3.196206 | 13.749980 |
| 6 | -1.426959 | -3.920845 | 13.749980 |
| 6 | 1.426959  | -3.920845 | 13.749980 |
| 6 | 2.682072  | -3.196206 | 13.749980 |
| 6 | 4.109031  | -0.724640 | 13.749980 |
| 6 | 4.109031  | 0.724640  | 13.749980 |
| 6 | 2.682072  | 3.196206  | 13.749980 |
| 6 | 1.426959  | 3.920845  | 13.749980 |
| 6 | -3.194954 | 2.678631  | 12.502260 |
| 6 | -3.917240 | 1.427596  | 12.502260 |
| 6 | -3.917240 | -1.427596 | 12.502260 |
| 6 | -3.194954 | -2.678631 | 12.502260 |
| 6 | -0.722285 | -4.106227 | 12.502260 |
| 6 | 0.722285  | -4.106227 | 12.502260 |
| 6 | 3.194954  | -2.678631 | 12.502260 |
| 6 | 3.917240  | -1.427596 | 12.502260 |
| 6 | 3.917240  | 1.427596  | 12.502260 |
| 6 | 3.194954  | 2.678631  | 12.502260 |
| 6 | 0.722285  | 4.106227  | 12.502260 |
| 6 | -0.722285 | 4.106227  | 12.502260 |
| 6 | -4.104886 | 0.721224  | 11.249111 |
| 6 | -4.104886 | -0.721224 | 11.249111 |
| 6 | -2.677042 | -3.194324 | 11.249111 |
| 6 | -1.427845 | -3.915548 | 11.249111 |
| 6 | 1.427845  | -3.915548 | 11.249111 |
| 6 | 2.677042  | -3.194324 | 11.249111 |
| 6 | 4.104886  | -0.721224 | 11.249111 |
| 6 | 4.104886  | 0.721224  | 11.249111 |
| 6 | 2.677042  | 3.194324  | 11.249111 |
| 6 | 1.427845  | 3.915548  | 11.249111 |
| 6 | -1.427845 | 3.915548  | 11.249111 |
| 6 | -2.677042 | 3.194324  | 11.249111 |
| 6 | -3.920529 | -1.427018 | 9.999435  |
| 6 | -3.196099 | -2.681768 | 9.999435  |
| 6 | -0.724430 | -4.108787 | 9.999435  |
| 6 | 0.724430  | -4.108787 | 9.999435  |
| 6 | 3.196099  | -2.681768 | 9.999435  |
| 6 | 3.920529  | -1.427018 | 9.999435  |
| 6 | 3.920529  | 1.427018  | 9.999435  |
| 6 | 3.196099  | 2.681768  | 9.999435  |
| 6 | 0.724430  | 4.108787  | 9.999435  |
| 6 | -0.724430 | 4.108787  | 9.999435  |
| 6 | -3.196099 | 2.681768  | 9.999435  |
| 6 | -3.920529 | 1.427018  | 9.999435  |
| 6 | -2.679266 | -3.195189 | 8.752107  |
| 6 | -1.427482 | -3.917907 | 8.752107  |
| 6 | 1.427482  | -3.917907 | 8.752107  |
| 6 | 2.679266  | -3.195189 | 8.752107  |
| 6 | 4.106748  | -0.722718 | 8.752107  |
| 6 | 4.106748  | 0.722718  | 8.752107  |
| 6 | 2.679266  | 3.195189  | 8.752107  |

|   |           |           |          |
|---|-----------|-----------|----------|
| 6 | 1.427482  | 3.917907  | 8.752107 |
| 6 | -1.427482 | 3.917907  | 8.752107 |
| 6 | -2.679266 | 3.195189  | 8.752107 |
| 6 | -4.106748 | 0.722718  | 8.752107 |
| 6 | -4.106748 | -0.722718 | 8.752107 |
| 6 | -0.721043 | -4.104686 | 7.499370 |
| 6 | 0.721043  | -4.104686 | 7.499370 |
| 6 | 3.194241  | -2.676785 | 7.499370 |
| 6 | 3.915284  | -1.427901 | 7.499370 |
| 6 | 3.915284  | 1.427901  | 7.499370 |
| 6 | 3.194241  | 2.676785  | 7.499370 |
| 6 | 0.721043  | 4.104686  | 7.499370 |
| 6 | -0.721043 | 4.104686  | 7.499370 |
| 6 | -3.194241 | 2.676785  | 7.499370 |
| 6 | -3.915284 | 1.427901  | 7.499370 |
| 6 | -3.915284 | -1.427901 | 7.499370 |
| 6 | -3.194241 | -2.676785 | 7.499370 |
| 6 | 1.427091  | -3.920132 | 6.248985 |
| 6 | 2.681388  | -3.195963 | 6.248985 |
| 6 | 4.108480  | -0.724169 | 6.248985 |
| 6 | 4.108480  | 0.724169  | 6.248985 |
| 6 | 2.681388  | 3.195963  | 6.248985 |
| 6 | 1.427091  | 3.920132  | 6.248985 |
| 6 | -1.427091 | 3.920132  | 6.248985 |
| 6 | -2.681388 | 3.195963  | 6.248985 |
| 6 | -4.108480 | 0.724169  | 6.248985 |
| 6 | -4.108480 | -0.724169 | 6.248985 |
| 6 | -2.681388 | -3.195963 | 6.248985 |
| 6 | -1.427091 | -3.920132 | 6.248985 |
| 6 | 3.195409  | -2.679868 | 5.001917 |
| 6 | 3.918538  | -1.427372 | 5.001917 |
| 6 | 3.918538  | 1.427372  | 5.001917 |
| 6 | 3.195409  | 2.679868  | 5.001917 |
| 6 | 0.723129  | 4.107239  | 5.001917 |
| 6 | -0.723129 | 4.107239  | 5.001917 |
| 6 | -3.195409 | 2.679868  | 5.001917 |
| 6 | -3.918538 | 1.427372  | 5.001917 |
| 6 | -3.918538 | -1.427372 | 5.001917 |
| 6 | -3.195409 | -2.679868 | 5.001917 |
| 6 | -0.723129 | -4.107239 | 5.001917 |
| 6 | 0.723129  | -4.107239 | 5.001917 |
| 6 | 4.104565  | -0.720934 | 3.749672 |
| 6 | 4.104565  | 0.720934  | 3.749672 |
| 6 | 2.676630  | 3.194190  | 3.749672 |
| 6 | 1.427935  | 3.915125  | 3.749672 |
| 6 | -1.427935 | 3.915125  | 3.749672 |
| 6 | -2.676630 | 3.194190  | 3.749672 |
| 6 | -4.104565 | 0.720934  | 3.749672 |
| 6 | -4.104565 | -0.720934 | 3.749672 |
| 6 | -2.676630 | -3.194190 | 3.749672 |
| 6 | -1.427935 | -3.915125 | 3.749672 |
| 6 | 1.427935  | -3.915125 | 3.749672 |
| 6 | 2.676630  | -3.194190 | 3.749672 |
| 6 | 3.919660  | 1.427175  | 2.498616 |
| 6 | 3.195800  | 2.680938  | 2.498616 |
| 6 | 0.723860  | 4.108113  | 2.498616 |
| 6 | -0.723860 | 4.108113  | 2.498616 |
| 6 | -3.195800 | 2.680938  | 2.498616 |
| 6 | -3.919660 | 1.427175  | 2.498616 |
| 6 | -3.919660 | -1.427175 | 2.498616 |
| 6 | -3.195800 | -2.680938 | 2.498616 |
| 6 | -0.723860 | -4.108113 | 2.498616 |
| 6 | 0.723860  | -4.108113 | 2.498616 |
| 6 | 3.195800  | -2.680938 | 2.498616 |
| 6 | 3.919660  | -1.427175 | 2.498616 |
| 6 | 2.680429  | 3.195615  | 1.251679 |
| 6 | 1.427269  | 3.919127  | 1.251679 |
| 6 | -1.427269 | 3.919127  | 1.251679 |
| 6 | -2.680429 | 3.195615  | 1.251679 |
| 6 | -4.107698 | 0.723512  | 1.251679 |



|   |           |           |           |
|---|-----------|-----------|-----------|
| 6 | -4.107698 | -0.723512 | 1.251679  |
| 6 | -2.680429 | -3.195615 | 1.251679  |
| 6 | -1.427269 | -3.919127 | 1.251679  |
| 6 | 1.427269  | -3.919127 | 1.251679  |
| 6 | 2.680429  | -3.195615 | 1.251679  |
| 6 | 4.107698  | -0.723512 | 1.251679  |
| 6 | 4.107698  | 0.723512  | 1.251679  |
| 6 | 0.720898  | 4.104535  | 0.000000  |
| 6 | -0.720898 | 4.104535  | 0.000000  |
| 6 | -3.194182 | 2.676583  | 0.000000  |
| 6 | -3.915080 | 1.427951  | 0.000000  |
| 6 | -3.915080 | -1.427951 | 0.000000  |
| 6 | -3.194182 | -2.676583 | 0.000000  |
| 6 | -0.720898 | -4.104535 | 0.000000  |
| 6 | 0.720898  | -4.104535 | 0.000000  |
| 6 | 3.194182  | -2.676583 | 0.000000  |
| 6 | 3.915080  | -1.427951 | 0.000000  |
| 6 | 3.915080  | 1.427951  | 0.000000  |
| 6 | 3.194182  | 2.676583  | 0.000000  |
| 6 | -1.427269 | 3.919127  | -1.251679 |
| 6 | -2.680429 | 3.195615  | -1.251679 |
| 6 | -4.107698 | 0.723512  | -1.251679 |
| 6 | -4.107698 | -0.723512 | -1.251679 |
| 6 | -2.680429 | -3.195615 | -1.251679 |
| 6 | -1.427269 | -3.919127 | -1.251679 |
| 6 | 1.427269  | -3.919127 | -1.251679 |
| 6 | 2.680429  | -3.195615 | -1.251679 |
| 6 | 4.107698  | -0.723512 | -1.251679 |
| 6 | 4.107698  | 0.723512  | -1.251679 |
| 6 | 2.680429  | 3.195615  | -1.251679 |
| 6 | 1.427269  | 3.919127  | -1.251679 |
| 6 | -3.195800 | 2.680938  | -2.498616 |
| 6 | -3.919660 | 1.427175  | -2.498616 |
| 6 | -3.919660 | -1.427175 | -2.498616 |
| 6 | -3.195800 | -2.680938 | -2.498616 |
| 6 | -0.723860 | -4.108113 | -2.498616 |
| 6 | 0.723860  | -4.108113 | -2.498616 |
| 6 | 3.195800  | -2.680938 | -2.498616 |
| 6 | 3.919660  | -1.427175 | -2.498616 |
| 6 | 3.919660  | 1.427175  | -2.498616 |
| 6 | 3.195800  | 2.680938  | -2.498616 |
| 6 | 0.723860  | 4.108113  | -2.498616 |
| 6 | -0.723860 | 4.108113  | -2.498616 |
| 6 | -4.104565 | 0.720934  | -3.749672 |
| 6 | -4.104565 | -0.720934 | -3.749672 |
| 6 | -2.676630 | -3.194190 | -3.749672 |
| 6 | -1.427935 | -3.915125 | -3.749672 |
| 6 | 1.427935  | -3.915125 | -3.749672 |
| 6 | 2.676630  | -3.194190 | -3.749672 |
| 6 | 4.104565  | -0.720934 | -3.749672 |
| 6 | 4.104565  | 0.720934  | -3.749672 |
| 6 | 2.676630  | 3.194190  | -3.749672 |
| 6 | 1.427935  | 3.915125  | -3.749672 |
| 6 | -1.427935 | 3.915125  | -3.749672 |
| 6 | -2.676630 | 3.194190  | -3.749672 |
| 6 | -3.918538 | -1.427372 | -5.001917 |
| 6 | -3.195409 | -2.679868 | -5.001917 |
| 6 | -0.723129 | -4.107239 | -5.001917 |
| 6 | 0.723129  | -4.107239 | -5.001917 |
| 6 | 3.195409  | -2.679868 | -5.001917 |
| 6 | 3.918538  | -1.427372 | -5.001917 |
| 6 | 3.918538  | 1.427372  | -5.001917 |
| 6 | 3.195409  | 2.679868  | -5.001917 |
| 6 | 0.723129  | 4.107239  | -5.001917 |
| 6 | -0.723129 | 4.107239  | -5.001917 |
| 6 | -3.195409 | 2.679868  | -5.001917 |
| 6 | -3.918538 | 1.427372  | -5.001917 |
| 6 | -2.681388 | -3.195963 | -6.248985 |
| 6 | -1.427091 | -3.920132 | -6.248985 |
| 6 | 1.427091  | -3.920132 | -6.248985 |

|   |           |           |            |
|---|-----------|-----------|------------|
| 6 | 2.681388  | -3.195963 | -6.248985  |
| 6 | 4.108480  | -0.724169 | -6.248985  |
| 6 | 4.108480  | 0.724169  | -6.248985  |
| 6 | 2.681388  | 3.195963  | -6.248985  |
| 6 | 1.427091  | 3.920132  | -6.248985  |
| 6 | -1.427091 | 3.920132  | -6.248985  |
| 6 | -2.681388 | 3.195963  | -6.248985  |
| 6 | -4.108480 | 0.724169  | -6.248985  |
| 6 | -4.108480 | -0.724169 | -6.248985  |
| 6 | -0.721043 | -4.104686 | -7.499370  |
| 6 | 0.721043  | -4.104686 | -7.499370  |
| 6 | 3.194241  | -2.676785 | -7.499370  |
| 6 | 3.915284  | -1.427901 | -7.499370  |
| 6 | 3.915284  | 1.427901  | -7.499370  |
| 6 | 3.194241  | 2.676785  | -7.499370  |
| 6 | 0.721043  | 4.104686  | -7.499370  |
| 6 | -0.721043 | 4.104686  | -7.499370  |
| 6 | -3.194241 | 2.676785  | -7.499370  |
| 6 | -3.915284 | 1.427901  | -7.499370  |
| 6 | -3.915284 | -1.427901 | -7.499370  |
| 6 | -3.194241 | -2.676785 | -7.499370  |
| 6 | 1.427482  | -3.917907 | -8.752107  |
| 6 | 2.679266  | -3.195189 | -8.752107  |
| 6 | 4.106748  | -0.722718 | -8.752107  |
| 6 | 4.106748  | 0.722718  | -8.752107  |
| 6 | 2.679266  | 3.195189  | -8.752107  |
| 6 | 1.427482  | 3.917907  | -8.752107  |
| 6 | -1.427482 | 3.917907  | -8.752107  |
| 6 | -2.679266 | 3.195189  | -8.752107  |
| 6 | -4.106748 | 0.722718  | -8.752107  |
| 6 | -4.106748 | -0.722718 | -8.752107  |
| 6 | -2.679266 | -3.195189 | -8.752107  |
| 6 | -1.427482 | -3.917907 | -8.752107  |
| 6 | 3.196099  | -2.681768 | -9.999435  |
| 6 | 3.920529  | -1.427018 | -9.999435  |
| 6 | 3.920529  | 1.427018  | -9.999435  |
| 6 | 3.196099  | 2.681768  | -9.999435  |
| 6 | 0.724430  | 4.108787  | -9.999435  |
| 6 | -0.724430 | 4.108787  | -9.999435  |
| 6 | -3.196099 | 2.681768  | -9.999435  |
| 6 | -3.920529 | 1.427018  | -9.999435  |
| 6 | -3.920529 | -1.427018 | -9.999435  |
| 6 | -3.196099 | -2.681768 | -9.999435  |
| 6 | -0.724430 | -4.108787 | -9.999435  |
| 6 | 0.724430  | -4.108787 | -9.999435  |
| 6 | 4.104886  | -0.721224 | -11.249111 |
| 6 | 4.104886  | 0.721224  | -11.249111 |
| 6 | 2.677042  | 3.194324  | -11.249111 |
| 6 | 1.427845  | 3.915548  | -11.249111 |
| 6 | -1.427845 | 3.915548  | -11.249111 |
| 6 | -2.677042 | 3.194324  | -11.249111 |
| 6 | -4.104886 | 0.721224  | -11.249111 |
| 6 | -4.104886 | -0.721224 | -11.249111 |
| 6 | -2.677042 | -3.194324 | -11.249111 |
| 6 | -1.427845 | -3.915548 | -11.249111 |
| 6 | 1.427845  | -3.915548 | -11.249111 |
| 6 | 2.677042  | -3.194324 | -11.249111 |
| 6 | 3.917240  | 1.427596  | -12.502260 |
| 6 | 3.194954  | 2.678631  | -12.502260 |
| 6 | 0.722285  | 4.106227  | -12.502260 |
| 6 | -0.722285 | 4.106227  | -12.502260 |
| 6 | -3.194954 | 2.678631  | -12.502260 |
| 6 | -3.917240 | 1.427596  | -12.502260 |
| 6 | -3.917240 | -1.427596 | -12.502260 |
| 6 | -3.194954 | -2.678631 | -12.502260 |
| 6 | -0.722285 | -4.106227 | -12.502260 |
| 6 | 0.722285  | -4.106227 | -12.502260 |
| 6 | 3.194954  | -2.678631 | -12.502260 |
| 6 | 3.917240  | -1.427596 | -12.502260 |
| 6 | 2.682072  | 3.196206  | -13.749980 |

|   |           |           |            |
|---|-----------|-----------|------------|
| 6 | 1.426959  | 3.920845  | -13.749980 |
| 6 | -1.426959 | 3.920845  | -13.749980 |
| 6 | -2.682072 | 3.196206  | -13.749980 |
| 6 | -4.109031 | 0.724640  | -13.749980 |
| 6 | -4.109031 | -0.724640 | -13.749980 |
| 6 | -2.682072 | -3.196206 | -13.749980 |
| 6 | -1.426959 | -3.920845 | -13.749980 |
| 6 | 1.426959  | -3.920845 | -13.749980 |
| 6 | 2.682072  | -3.196206 | -13.749980 |
| 6 | 4.109031  | -0.724640 | -13.749980 |
| 6 | 4.109031  | 0.724640  | -13.749980 |
| 6 | 0.721478  | 4.105168  | -14.998916 |
| 6 | -0.721478 | 4.105168  | -14.998916 |
| 6 | -3.194441 | 2.677402  | -14.998916 |
| 6 | -3.915918 | 1.427766  | -14.998916 |
| 6 | -3.915918 | -1.427766 | -14.998916 |
| 6 | -3.194441 | -2.677402 | -14.998916 |
| 6 | -0.721478 | -4.105168 | -14.998916 |
| 6 | 0.721478  | -4.105168 | -14.998916 |
| 6 | 3.194441  | -2.677402 | -14.998916 |
| 6 | 3.915918  | -1.427766 | -14.998916 |
| 6 | 3.915918  | 1.427766  | -14.998916 |
| 6 | 3.194441  | 2.677402  | -14.998916 |
| 6 | -1.427714 | 3.916540  | -16.252387 |
| 6 | -2.677966 | 3.194707  | -16.252387 |
| 6 | -4.105680 | 0.721834  | -16.252387 |
| 6 | -4.105680 | -0.721834 | -16.252387 |
| 6 | -2.677966 | -3.194707 | -16.252387 |
| 6 | -1.427714 | -3.916540 | -16.252387 |
| 6 | 1.427714  | -3.916540 | -16.252387 |
| 6 | 2.677966  | -3.194707 | -16.252387 |
| 6 | 4.105680  | -0.721834 | -16.252387 |
| 6 | 4.105680  | 0.721834  | -16.252387 |
| 6 | 2.677966  | 3.194707  | -16.252387 |
| 6 | 1.427714  | 3.916540  | -16.252387 |
| 6 | -3.196283 | 2.682296  | -17.500633 |
| 6 | -3.921078 | 1.426915  | -17.500633 |
| 6 | -3.921078 | -1.426915 | -17.500633 |
| 6 | -3.196283 | -2.682296 | -17.500633 |
| 6 | -0.724795 | -4.109211 | -17.500633 |
| 6 | 0.724795  | -4.109211 | -17.500633 |
| 6 | 3.196283  | -2.682296 | -17.500633 |
| 6 | 3.921078  | -1.426915 | -17.500633 |
| 6 | 3.921078  | 1.426915  | -17.500633 |
| 6 | 3.196283  | 2.682296  | -17.500633 |
| 6 | 0.724795  | 4.109211  | -17.500633 |
| 6 | -0.724795 | 4.109211  | -17.500633 |
| 6 | -4.105532 | 0.721806  | -18.748798 |
| 6 | -4.105532 | -0.721806 | -18.748798 |
| 6 | -2.677868 | -3.194592 | -18.748798 |
| 6 | -1.427664 | -3.916398 | -18.748798 |
| 6 | 1.427664  | -3.916398 | -18.748798 |
| 6 | 2.677868  | -3.194592 | -18.748798 |
| 6 | 4.105532  | -0.721806 | -18.748798 |
| 6 | 4.105532  | 0.721806  | -18.748798 |
| 6 | 2.677868  | 3.194592  | -18.748798 |
| 6 | 1.427664  | 3.916398  | -18.748798 |
| 6 | -1.427664 | 3.916398  | -18.748798 |
| 6 | -2.677868 | 3.194592  | -18.748798 |
| 6 | -3.915804 | -1.427838 | -20.002498 |
| 6 | -3.194445 | -2.677267 | -20.002498 |
| 6 | -0.721358 | -4.105104 | -20.002498 |
| 6 | 0.721358  | -4.105104 | -20.002498 |
| 6 | 3.194445  | -2.677267 | -20.002498 |
| 6 | 3.915804  | -1.427838 | -20.002498 |
| 6 | 3.915804  | 1.427838  | -20.002498 |
| 6 | 3.194445  | 2.677267  | -20.002498 |
| 6 | 0.721358  | 4.105104  | -20.002498 |
| 6 | -0.721358 | 4.105104  | -20.002498 |
| 6 | -3.194445 | 2.677267  | -20.002498 |

|   |           |           |            |
|---|-----------|-----------|------------|
| 6 | -3.915804 | 1.427838  | -20.002498 |
| 6 | -2.682440 | -3.196333 | -21.251415 |
| 6 | -1.426885 | -3.921228 | -21.251415 |
| 6 | 1.426885  | -3.921228 | -21.251415 |
| 6 | 2.682440  | -3.196333 | -21.251415 |
| 6 | 4.109326  | -0.724895 | -21.251415 |
| 6 | 4.109326  | 0.724895  | -21.251415 |
| 6 | 2.682440  | 3.196333  | -21.251415 |
| 6 | 1.426885  | 3.921228  | -21.251415 |
| 6 | -1.426885 | 3.921228  | -21.251415 |
| 6 | -2.682440 | 3.196333  | -21.251415 |
| 6 | -4.109326 | 0.724895  | -21.251415 |
| 6 | -4.109326 | -0.724895 | -21.251415 |
| 6 | -0.722219 | -4.105992 | -22.498765 |
| 6 | 0.722219  | -4.105992 | -22.498765 |
| 6 | 3.194784  | -2.678456 | -22.498765 |
| 6 | 3.917003  | -1.427536 | -22.498765 |
| 6 | 3.917003  | 1.427536  | -22.498765 |
| 6 | 3.194784  | 2.678456  | -22.498765 |
| 6 | 0.722219  | 4.105992  | -22.498765 |
| 6 | -0.722219 | 4.105992  | -22.498765 |
| 6 | -3.194784 | 2.678456  | -22.498765 |
| 6 | -3.917003 | 1.427536  | -22.498765 |
| 6 | -3.917003 | -1.427536 | -22.498765 |
| 6 | -3.194784 | -2.678456 | -22.498765 |
| 6 | 1.427967  | -3.914991 | -23.752593 |
| 6 | 2.676498  | -3.194151 | -23.752593 |
| 6 | 4.104465  | -0.720840 | -23.752593 |
| 6 | 4.104465  | 0.720840  | -23.752593 |
| 6 | 2.676498  | 3.194151  | -23.752593 |
| 6 | 1.427967  | 3.914991  | -23.752593 |
| 6 | -1.427967 | 3.914991  | -23.752593 |
| 6 | -2.676498 | 3.194151  | -23.752593 |
| 6 | -4.104465 | 0.720840  | -23.752593 |
| 6 | -4.104465 | -0.720840 | -23.752593 |
| 6 | -2.676498 | -3.194151 | -23.752593 |
| 6 | -1.427967 | -3.914991 | -23.752593 |
| 6 | 3.196327  | -2.682489 | -25.002373 |
| 6 | 3.921267  | -1.426855 | -25.002373 |
| 6 | 3.921267  | 1.426855  | -25.002373 |
| 6 | 3.196327  | 2.682489  | -25.002373 |
| 6 | 0.724941  | 4.109345  | -25.002373 |
| 6 | -0.724941 | 4.109345  | -25.002373 |
| 6 | -3.196327 | 2.682489  | -25.002373 |
| 6 | -3.921267 | 1.426855  | -25.002373 |
| 6 | -3.921267 | -1.426855 | -25.002373 |
| 6 | -3.196327 | -2.682489 | -25.002373 |
| 6 | -0.724941 | -4.109345 | -25.002373 |
| 6 | 0.724941  | -4.109345 | -25.002373 |
| 6 | 4.106544  | -0.722748 | -26.248819 |
| 6 | 4.106544  | 0.722748  | -26.248819 |
| 6 | 2.679191  | 3.194997  | -26.248819 |
| 6 | 1.427354  | 3.917746  | -26.248819 |
| 6 | -1.427354 | 3.917746  | -26.248819 |
| 6 | -2.679191 | 3.194997  | -26.248819 |
| 6 | -4.106544 | 0.722748  | -26.248819 |
| 6 | -4.106544 | -0.722748 | -26.248819 |
| 6 | -2.679191 | -3.194997 | -26.248819 |
| 6 | -1.427354 | -3.917746 | -26.248819 |
| 6 | 1.427354  | -3.917746 | -26.248819 |
| 6 | 2.679191  | -3.194997 | -26.248819 |
| 6 | 3.914030  | 1.428118  | -27.502662 |
| 6 | 3.193801  | 2.675590  | -27.502662 |
| 6 | 0.720229  | 4.103708  | -27.502662 |
| 6 | -0.720229 | 4.103708  | -27.502662 |
| 6 | -3.193801 | 2.675590  | -27.502662 |
| 6 | -3.914030 | 1.428118  | -27.502662 |
| 6 | -3.914030 | -1.428118 | -27.502662 |
| 6 | -3.193801 | -2.675590 | -27.502662 |
| 6 | -0.720229 | -4.103708 | -27.502662 |

|   |           |           |            |
|---|-----------|-----------|------------|
| 6 | 0.720229  | -4.103708 | -27.502662 |
| 6 | 3.193801  | -2.675590 | -27.502662 |
| 6 | 3.914030  | -1.428118 | -27.502662 |
| 6 | 2.682633  | 3.196515  | -28.753644 |
| 6 | 1.426947  | 3.921486  | -28.753644 |
| 6 | -1.426947 | 3.921486  | -28.753644 |
| 6 | -2.682633 | 3.196515  | -28.753644 |
| 6 | -4.109580 | 0.724971  | -28.753644 |
| 6 | -4.109580 | -0.724971 | -28.753644 |
| 6 | -2.682633 | -3.196515 | -28.753644 |
| 6 | -1.426947 | -3.921486 | -28.753644 |
| 6 | 1.426947  | -3.921486 | -28.753644 |
| 6 | 2.682633  | -3.196515 | -28.753644 |
| 6 | 4.109580  | -0.724971 | -28.753644 |
| 6 | 4.109580  | 0.724971  | -28.753644 |
| 6 | 0.723646  | 4.107987  | -29.998929 |
| 6 | -0.723646 | 4.107987  | -29.998929 |
| 6 | -3.195798 | 2.680689  | -29.998929 |
| 6 | -3.919444 | 1.427298  | -29.998929 |
| 6 | -3.919444 | -1.427298 | -29.998929 |
| 6 | -3.195798 | -2.680689 | -29.998929 |
| 6 | -0.723646 | -4.107987 | -29.998929 |
| 6 | 0.723646  | -4.107987 | -29.998929 |
| 6 | 3.195798  | -2.680689 | -29.998929 |
| 6 | 3.919444  | -1.427298 | -29.998929 |
| 6 | 3.919444  | 1.427298  | -29.998929 |
| 6 | 3.195798  | 2.680689  | -29.998929 |
| 6 | -1.428778 | 3.913220  | -31.252453 |
| 6 | -2.674559 | 3.193968  | -31.252453 |
| 6 | -4.103337 | 0.719252  | -31.252453 |
| 6 | -4.103337 | -0.719252 | -31.252453 |
| 6 | -2.674559 | -3.193968 | -31.252453 |
| 6 | -1.428778 | -3.913220 | -31.252453 |
| 6 | 1.428778  | -3.913220 | -31.252453 |
| 6 | 2.674559  | -3.193968 | -31.252453 |
| 6 | 4.103337  | -0.719252 | -31.252453 |
| 6 | 4.103337  | 0.719252  | -31.252453 |
| 6 | 2.674559  | 3.193968  | -31.252453 |
| 6 | 1.428778  | 3.913220  | -31.252453 |
| 6 | -3.195578 | 2.681912  | -32.505480 |
| 6 | -3.920393 | 1.426496  | -32.505480 |
| 6 | -3.920393 | -1.426496 | -32.505480 |
| 6 | -3.195578 | -2.681912 | -32.505480 |
| 6 | -0.724815 | -4.108408 | -32.505480 |
| 6 | 0.724815  | -4.108408 | -32.505480 |
| 6 | 3.195578  | -2.681912 | -32.505480 |
| 6 | 3.920393  | -1.426496 | -32.505480 |
| 6 | 3.920393  | 1.426496  | -32.505480 |
| 6 | 3.195578  | 2.681912  | -32.505480 |
| 6 | 0.724815  | 4.108408  | -32.505480 |
| 6 | -0.724815 | 4.108408  | -32.505480 |
| 6 | -4.103876 | 0.724213  | -33.748755 |
| 6 | -4.103876 | -0.724213 | -33.748755 |
| 6 | -2.679125 | -3.191955 | -33.748755 |
| 6 | -1.424751 | -3.916168 | -33.748755 |
| 6 | 1.424751  | -3.916168 | -33.748755 |
| 6 | 2.679125  | -3.191955 | -33.748755 |
| 6 | 4.103876  | -0.724213 | -33.748755 |
| 6 | 4.103876  | 0.724213  | -33.748755 |
| 6 | 2.679125  | 3.191955  | -33.748755 |
| 6 | 1.424751  | 3.916168  | -33.748755 |
| 6 | -1.424751 | 3.916168  | -33.748755 |
| 6 | -2.679125 | 3.191955  | -33.748755 |
| 6 | -3.897550 | -1.424160 | -35.001870 |
| 6 | -3.182134 | -2.663297 | -35.001870 |
| 6 | -0.715416 | -4.087457 | -35.001870 |
| 6 | 0.715416  | -4.087457 | -35.001870 |
| 6 | 3.182134  | -2.663297 | -35.001870 |
| 6 | 3.897550  | -1.424160 | -35.001870 |
| 6 | 3.897550  | 1.424160  | -35.001870 |

|   |           |           |            |
|---|-----------|-----------|------------|
| 6 | 3.182134  | 2.663297  | -35.001870 |
| 6 | 0.715416  | 4.087457  | -35.001870 |
| 6 | -0.715416 | 4.087457  | -35.001870 |
| 6 | -3.182134 | 2.663297  | -35.001870 |
| 6 | -3.897550 | 1.424160  | -35.001870 |
| 6 | -2.677700 | -3.186213 | -36.263379 |
| 6 | -1.420492 | -3.912063 | -36.263379 |
| 6 | 1.420492  | -3.912063 | -36.263379 |
| 6 | 2.677700  | -3.186213 | -36.263379 |
| 6 | 4.098191  | -0.725850 | -36.263379 |
| 6 | 4.098191  | 0.725850  | -36.263379 |
| 6 | 2.677700  | 3.186213  | -36.263379 |
| 6 | 1.420492  | 3.912063  | -36.263379 |
| 6 | -1.420492 | 3.912063  | -36.263379 |
| 6 | -2.677700 | 3.186213  | -36.263379 |
| 6 | -4.098191 | 0.725850  | -36.263379 |
| 6 | -4.098191 | -0.725850 | -36.263379 |
| 6 | -0.735360 | -4.148109 | -37.503516 |
| 6 | 0.735360  | -4.148109 | -37.503516 |
| 6 | 3.224688  | -2.710895 | -37.503516 |
| 6 | 3.960047  | -1.437214 | -37.503516 |
| 6 | 3.960047  | 1.437214  | -37.503516 |
| 6 | 3.224688  | 2.710895  | -37.503516 |
| 6 | 0.735360  | 4.148109  | -37.503516 |
| 6 | -0.735360 | 4.148109  | -37.503516 |
| 6 | -3.224688 | 2.710895  | -37.503516 |
| 6 | -3.960047 | 1.437214  | -37.503516 |
| 6 | -3.960047 | -1.437214 | -37.503516 |
| 6 | -3.224688 | -2.710895 | -37.503516 |
| 6 | 1.507392  | -3.995101 | -38.718473 |
| 6 | 2.706163  | -3.302990 | -38.718473 |
| 6 | 4.213555  | -0.692111 | -38.718473 |
| 6 | 4.213555  | 0.692111  | -38.718473 |
| 6 | 2.706163  | 3.302990  | -38.718473 |
| 6 | 1.507392  | 3.995101  | -38.718473 |
| 6 | -1.507392 | 3.995101  | -38.718473 |
| 6 | -2.706163 | 3.302990  | -38.718473 |
| 6 | -4.213555 | 0.692111  | -38.718473 |
| 6 | -4.213555 | -0.692111 | -38.718473 |
| 6 | -2.706163 | -3.302990 | -38.718473 |
| 6 | -1.507392 | -3.995101 | -38.718473 |
| 1 | -3.200657 | -3.090535 | 39.674902  |
| 1 | -1.076153 | -4.317118 | 39.674902  |
| 1 | 1.076153  | -4.317118 | 39.674902  |
| 1 | 3.200657  | -3.090535 | 39.674902  |
| 1 | 4.276810  | -1.226583 | 39.674902  |
| 1 | 4.276810  | 1.226583  | 39.674902  |
| 1 | 3.200657  | 3.090535  | 39.674902  |
| 1 | 1.076153  | 4.317118  | 39.674902  |
| 1 | -1.076153 | 4.317118  | 39.674902  |
| 1 | -3.200657 | 3.090535  | 39.674902  |
| 1 | -4.276810 | 1.226583  | 39.674902  |
| 1 | -4.276810 | -1.226583 | 39.674902  |
| 1 | 1.076153  | -4.317118 | -39.674902 |
| 1 | 3.200657  | -3.090535 | -39.674902 |
| 1 | 4.276810  | -1.226583 | -39.674902 |
| 1 | 4.276810  | 1.226583  | -39.674902 |
| 1 | 3.200657  | 3.090535  | -39.674902 |
| 1 | 1.076153  | 4.317118  | -39.674902 |
| 1 | -1.076153 | 4.317118  | -39.674902 |
| 1 | -3.200657 | 3.090535  | -39.674902 |
| 1 | -4.276810 | 1.226583  | -39.674902 |
| 1 | -4.276810 | -1.226583 | -39.674902 |
| 1 | -3.200657 | -3.090535 | -39.674902 |
| 1 | -1.076153 | -4.317118 | -39.674902 |

Nanotube (6,6) u32v0s  
B3LYP/STO-3G Energy: -28927.626377

|   |           |           |           |
|---|-----------|-----------|-----------|
| 6 | -2.707696 | -3.303202 | 39.331065 |
| 6 | -1.506809 | -3.996534 | 39.331065 |
| 6 | 1.506809  | -3.996534 | 39.331065 |
| 6 | 2.707696  | -3.303202 | 39.331065 |
| 6 | 4.214505  | -0.693332 | 39.331065 |
| 6 | 4.214505  | 0.693332  | 39.331065 |
| 6 | 2.707696  | 3.303202  | 39.331065 |
| 6 | 1.506809  | 3.996534  | 39.331065 |
| 6 | -1.506809 | 3.996534  | 39.331065 |
| 6 | -2.707696 | 3.303202  | 39.331065 |
| 6 | -4.214505 | 0.693332  | 39.331065 |
| 6 | -4.214505 | -0.693332 | 39.331065 |
| 6 | -0.737021 | -4.151099 | 38.118380 |
| 6 | 0.737021  | -4.151099 | 38.118380 |
| 6 | 3.226447  | -2.713828 | 38.118380 |
| 6 | 3.963468  | -1.437271 | 38.118380 |
| 6 | 3.963468  | 1.437271  | 38.118380 |
| 6 | 3.226447  | 2.713828  | 38.118380 |
| 6 | 0.737021  | 4.151099  | 38.118380 |
| 6 | -0.737021 | 4.151099  | 38.118380 |
| 6 | -3.226447 | 2.713828  | 38.118380 |
| 6 | -3.963468 | 1.437271  | 38.118380 |
| 6 | -3.963468 | -1.437271 | 38.118380 |
| 6 | -3.226447 | -2.713828 | 38.118380 |
| 6 | 1.420769  | -3.911647 | 36.878305 |
| 6 | 2.677201  | -3.186246 | 36.878305 |
| 6 | 4.097971  | -0.725401 | 36.878305 |
| 6 | 4.097971  | 0.725401  | 36.878305 |
| 6 | 2.677201  | 3.186246  | 36.878305 |
| 6 | 1.420769  | 3.911647  | 36.878305 |
| 6 | -1.420769 | 3.911647  | 36.878305 |
| 6 | -2.677201 | 3.186246  | 36.878305 |
| 6 | -4.097971 | 0.725401  | 36.878305 |
| 6 | -4.097971 | -0.725401 | 36.878305 |
| 6 | -2.677201 | -3.186246 | 36.878305 |
| 6 | -1.420769 | -3.911647 | 36.878305 |
| 6 | 3.183229  | -2.664955 | 35.615529 |
| 6 | 3.899533  | -1.424280 | 35.615529 |
| 6 | 3.899533  | 1.424280  | 35.615529 |
| 6 | 3.183229  | 2.664955  | 35.615529 |
| 6 | 0.716304  | 4.089235  | 35.615529 |
| 6 | -0.716304 | 4.089235  | 35.615529 |
| 6 | -3.183229 | 2.664955  | 35.615529 |
| 6 | -3.899533 | 1.424280  | 35.615529 |
| 6 | -3.899533 | -1.424280 | 35.615529 |
| 6 | -3.183229 | -2.664955 | 35.615529 |
| 6 | -0.716304 | -4.089235 | 35.615529 |
| 6 | 0.716304  | -4.089235 | 35.615529 |
| 6 | 4.106697  | -0.726064 | 34.365054 |
| 6 | 4.106697  | 0.726064  | 34.365054 |
| 6 | 2.682139  | 3.193472  | 34.365054 |
| 6 | 1.424559  | 3.919536  | 34.365054 |
| 6 | -1.424559 | 3.919536  | 34.365054 |
| 6 | -2.682139 | 3.193472  | 34.365054 |
| 6 | -4.106697 | 0.726064  | 34.365054 |
| 6 | -4.106697 | -0.726064 | 34.365054 |
| 6 | -2.682139 | -3.193472 | 34.365054 |
| 6 | -1.424559 | -3.919536 | 34.365054 |
| 6 | 1.424559  | -3.919536 | 34.365054 |
| 6 | 2.682139  | -3.193472 | 34.365054 |
| 6 | 3.920051  | 1.427038  | 33.121988 |
| 6 | 3.195877  | 2.681344  | 33.121988 |
| 6 | 0.724174  | 4.108383  | 33.121988 |
| 6 | -0.724174 | 4.108383  | 33.121988 |
| 6 | -3.195877 | 2.681344  | 33.121988 |
| 6 | -3.920051 | 1.427038  | 33.121988 |
| 6 | -3.920051 | -1.427038 | 33.121988 |
| 6 | -3.195877 | -2.681344 | 33.121988 |
| 6 | -0.724174 | -4.108383 | 33.121988 |

|   |           |           |           |
|---|-----------|-----------|-----------|
| 6 | 0.724174  | -4.108383 | 33.121988 |
| 6 | 3.195877  | -2.681344 | 33.121988 |
| 6 | 3.920051  | -1.427038 | 33.121988 |
| 6 | 2.676083  | 3.194920  | 31.867206 |
| 6 | 1.428840  | 3.915016  | 31.867206 |
| 6 | -1.428840 | 3.915016  | 31.867206 |
| 6 | -2.676083 | 3.194920  | 31.867206 |
| 6 | -4.104923 | 0.720096  | 31.867206 |
| 6 | -4.104923 | -0.720096 | 31.867206 |
| 6 | -2.676083 | -3.194920 | 31.867206 |
| 6 | -1.428840 | -3.915016 | 31.867206 |
| 6 | 1.428840  | -3.915016 | 31.867206 |
| 6 | 2.676083  | -3.194920 | 31.867206 |
| 6 | 4.104923  | -0.720096 | 31.867206 |
| 6 | 4.104923  | 0.720096  | 31.867206 |
| 6 | 0.725726  | 4.111237  | 30.616440 |
| 6 | -0.725726 | 4.111237  | 30.616440 |
| 6 | -3.197573 | 2.684116  | 30.616440 |
| 6 | -3.923299 | 1.427121  | 30.616440 |
| 6 | -3.923299 | -1.427121 | 30.616440 |
| 6 | -3.197573 | -2.684116 | 30.616440 |
| 6 | -0.725726 | -4.111237 | 30.616440 |
| 6 | 0.725726  | -4.111237 | 30.616440 |
| 6 | 3.197573  | -2.684116 | 30.616440 |
| 6 | 3.923299  | -1.427121 | 30.616440 |
| 6 | 3.923299  | 1.427121  | 30.616440 |
| 6 | 3.197573  | 2.684116  | 30.616440 |
| 6 | -1.427416 | 3.920913  | 29.371709 |
| 6 | -2.681902 | 3.196635  | 29.371709 |
| 6 | -4.109318 | 0.724278  | 29.371709 |
| 6 | -4.109318 | -0.724278 | 29.371709 |
| 6 | -2.681902 | -3.196635 | 29.371709 |
| 6 | -1.427416 | -3.920913 | 29.371709 |
| 6 | 1.427416  | -3.920913 | 29.371709 |
| 6 | 2.681902  | -3.196635 | 29.371709 |
| 6 | 4.109318  | -0.724278 | 29.371709 |
| 6 | 4.109318  | 0.724278  | 29.371709 |
| 6 | 2.681902  | 3.196635  | 29.371709 |
| 6 | 1.427416  | 3.920913  | 29.371709 |
| 6 | -3.194665 | 2.676762  | 28.118433 |
| 6 | -3.915476 | 1.428281  | 28.118433 |
| 6 | -3.915476 | -1.428281 | 28.118433 |
| 6 | -3.194665 | -2.676762 | 28.118433 |
| 6 | -0.720811 | -4.105042 | 28.118433 |
| 6 | 0.720811  | -4.105042 | 28.118433 |
| 6 | 3.194665  | -2.676762 | 28.118433 |
| 6 | 3.915476  | -1.428281 | 28.118433 |
| 6 | 3.915476  | 1.428281  | 28.118433 |
| 6 | 3.194665  | 2.676762  | 28.118433 |
| 6 | 0.720811  | 4.105042  | 28.118433 |
| 6 | -0.720811 | 4.105042  | 28.118433 |
| 6 | -4.110072 | 0.725136  | 26.867432 |
| 6 | -4.110072 | -0.725136 | 26.867432 |
| 6 | -2.683022 | -3.196859 | 26.867432 |
| 6 | -1.427050 | -3.921994 | 26.867432 |
| 6 | 1.427050  | -3.921994 | 26.867432 |
| 6 | 2.683022  | -3.196859 | 26.867432 |
| 6 | 4.110072  | -0.725136 | 26.867432 |
| 6 | 4.110072  | 0.725136  | 26.867432 |
| 6 | 2.683022  | 3.196859  | 26.867432 |
| 6 | 1.427050  | 3.921994  | 26.867432 |
| 6 | -1.427050 | 3.921994  | 26.867432 |
| 6 | -2.683022 | 3.196859  | 26.867432 |
| 6 | -3.920662 | -1.427359 | 25.621931 |
| 6 | -3.196460 | -2.681713 | 25.621931 |
| 6 | -0.724202 | -4.109072 | 25.621931 |
| 6 | 0.724202  | -4.109072 | 25.621931 |
| 6 | 3.196460  | -2.681713 | 25.621931 |
| 6 | 3.920662  | -1.427359 | 25.621931 |
| 6 | 3.920662  | 1.427359  | 25.621931 |



|   |           |           |           |
|---|-----------|-----------|-----------|
| 6 | 3.196460  | 2.681713  | 25.621931 |
| 6 | 0.724202  | 4.109072  | 25.621931 |
| 6 | -0.724202 | 4.109072  | 25.621931 |
| 6 | -3.196460 | 2.681713  | 25.621931 |
| 6 | -3.920662 | 1.427359  | 25.621931 |
| 6 | -2.677278 | -3.194850 | 24.369372 |
| 6 | -1.428183 | -3.916016 | 24.369372 |
| 6 | 1.428183  | -3.916016 | 24.369372 |
| 6 | 2.677278  | -3.194850 | 24.369372 |
| 6 | 4.105461  | -0.721166 | 24.369372 |
| 6 | 4.105461  | 0.721166  | 24.369372 |
| 6 | 2.677278  | 3.194850  | 24.369372 |
| 6 | 1.428183  | 3.916016  | 24.369372 |
| 6 | -1.428183 | 3.916016  | 24.369372 |
| 6 | -2.677278 | 3.194850  | 24.369372 |
| 6 | -4.105461 | 0.721166  | 24.369372 |
| 6 | -4.105461 | -0.721166 | 24.369372 |
| 6 | -0.724872 | -4.109824 | 23.118343 |
| 6 | 0.724872  | -4.109824 | 23.118343 |
| 6 | 3.196776  | -2.682669 | 23.118343 |
| 6 | 3.921648  | -1.427155 | 23.118343 |
| 6 | 3.921648  | 1.427155  | 23.118343 |
| 6 | 3.196776  | 2.682669  | 23.118343 |
| 6 | 0.724872  | 4.109824  | 23.118343 |
| 6 | -0.724872 | 4.109824  | 23.118343 |
| 6 | -3.196776 | 2.682669  | 23.118343 |
| 6 | -3.921648 | 1.427155  | 23.118343 |
| 6 | -3.921648 | -1.427155 | 23.118343 |
| 6 | -3.196776 | -2.682669 | 23.118343 |
| 6 | 1.427373  | -3.920667 | 21.872420 |
| 6 | 2.681711  | -3.196475 | 21.872420 |
| 6 | 4.109084  | -0.724193 | 21.872420 |
| 6 | 4.109084  | 0.724193  | 21.872420 |
| 6 | 2.681711  | 3.196475  | 21.872420 |
| 6 | 1.427373  | 3.920667  | 21.872420 |
| 6 | -1.427373 | 3.920667  | 21.872420 |
| 6 | -2.681711 | 3.196475  | 21.872420 |
| 6 | -4.109084 | 0.724193  | 21.872420 |
| 6 | -4.109084 | -0.724193 | 21.872420 |
| 6 | -2.681711 | -3.196475 | 21.872420 |
| 6 | -1.427373 | -3.920667 | 21.872420 |
| 6 | 3.194968  | -2.677588 | 20.620264 |
| 6 | 3.916344  | -1.428130 | 20.620264 |
| 6 | 3.916344  | 1.428130  | 20.620264 |
| 6 | 3.194968  | 2.677588  | 20.620264 |
| 6 | 0.721375  | 4.105718  | 20.620264 |
| 6 | -0.721375 | 4.105718  | 20.620264 |
| 6 | -3.194968 | 2.677588  | 20.620264 |
| 6 | -3.916344 | 1.428130  | 20.620264 |
| 6 | -3.916344 | -1.428130 | 20.620264 |
| 6 | -3.194968 | -2.677588 | 20.620264 |
| 6 | -0.721375 | -4.105718 | 20.620264 |
| 6 | 0.721375  | -4.105718 | 20.620264 |
| 6 | 4.109638  | -0.724703 | 19.369221 |
| 6 | 4.109638  | 0.724703  | 19.369221 |
| 6 | 2.682430  | 3.196699  | 19.369221 |
| 6 | 1.427208  | 3.921402  | 19.369221 |
| 6 | -1.427208 | 3.921402  | 19.369221 |
| 6 | -2.682430 | 3.196699  | 19.369221 |
| 6 | -4.109638 | 0.724703  | 19.369221 |
| 6 | -4.109638 | -0.724703 | 19.369221 |
| 6 | -2.682430 | -3.196699 | 19.369221 |
| 6 | -1.427208 | -3.921402 | 19.369221 |
| 6 | 1.427208  | -3.921402 | 19.369221 |
| 6 | 2.682430  | -3.196699 | 19.369221 |
| 6 | 3.920661  | 1.427369  | 18.123024 |
| 6 | 3.196468  | 2.681707  | 18.123024 |
| 6 | 0.724192  | 4.109076  | 18.123024 |
| 6 | -0.724192 | 4.109076  | 18.123024 |
| 6 | -3.196468 | 2.681707  | 18.123024 |

|   |           |           |           |
|---|-----------|-----------|-----------|
| 6 | -3.920661 | 1.427369  | 18.123024 |
| 6 | -3.920661 | -1.427369 | 18.123024 |
| 6 | -3.196468 | -2.681707 | 18.123024 |
| 6 | -0.724192 | -4.109076 | 18.123024 |
| 6 | 0.724192  | -4.109076 | 18.123024 |
| 6 | 3.196468  | -2.681707 | 18.123024 |
| 6 | 3.920661  | -1.427369 | 18.123024 |
| 6 | 2.677784  | 3.195040  | 16.871137 |
| 6 | 1.428094  | 3.916549  | 16.871137 |
| 6 | -1.428094 | 3.916549  | 16.871137 |
| 6 | -2.677784 | 3.195040  | 16.871137 |
| 6 | -4.105878 | 0.721509  | 16.871137 |
| 6 | -4.105878 | -0.721509 | 16.871137 |
| 6 | -2.677784 | -3.195040 | 16.871137 |
| 6 | -1.428094 | -3.916549 | 16.871137 |
| 6 | 1.428094  | -3.916549 | 16.871137 |
| 6 | 2.677784  | -3.195040 | 16.871137 |
| 6 | 4.105878  | -0.721509 | 16.871137 |
| 6 | 4.105878  | 0.721509  | 16.871137 |
| 6 | 0.724583  | 4.109506  | 15.620073 |
| 6 | -0.724583 | 4.109506  | 15.620073 |
| 6 | -3.196645 | 2.682260  | 15.620073 |
| 6 | -3.921228 | 1.427246  | 15.620073 |
| 6 | -3.921228 | -1.427246 | 15.620073 |
| 6 | -3.196645 | -2.682260 | 15.620073 |
| 6 | -0.724583 | -4.109506 | 15.620073 |
| 6 | 0.724583  | -4.109506 | 15.620073 |
| 6 | 3.196645  | -2.682260 | 15.620073 |
| 6 | 3.921228  | -1.427246 | 15.620073 |
| 6 | 3.921228  | 1.427246  | 15.620073 |
| 6 | 3.196645  | 2.682260  | 15.620073 |
| 6 | -1.427363 | 3.920670  | 14.373694 |
| 6 | -2.681718 | 3.196468  | 14.373694 |
| 6 | -4.109082 | 0.724202  | 14.373694 |
| 6 | -4.109082 | -0.724202 | 14.373694 |
| 6 | -2.681718 | -3.196468 | 14.373694 |
| 6 | -1.427363 | -3.920670 | 14.373694 |
| 6 | 1.427363  | -3.920670 | 14.373694 |
| 6 | 2.681718  | -3.196468 | 14.373694 |
| 6 | 4.109082  | -0.724202 | 14.373694 |
| 6 | 4.109082  | 0.724202  | 14.373694 |
| 6 | 2.681718  | 3.196468  | 14.373694 |
| 6 | 1.427363  | 3.920670  | 14.373694 |
| 6 | -3.195089 | 2.677915  | 13.122000 |
| 6 | -3.916687 | 1.428070  | 13.122000 |
| 6 | -3.916687 | -1.428070 | 13.122000 |
| 6 | -3.195089 | -2.677915 | 13.122000 |
| 6 | -0.721598 | -4.105985 | 13.122000 |
| 6 | 0.721598  | -4.105985 | 13.122000 |
| 6 | 3.195089  | -2.677915 | 13.122000 |
| 6 | 3.916687  | -1.428070 | 13.122000 |
| 6 | 3.916687  | 1.428070  | 13.122000 |
| 6 | 3.195089  | 2.677915  | 13.122000 |
| 6 | 0.721598  | 4.105985  | 13.122000 |
| 6 | -0.721598 | 4.105985  | 13.122000 |
| 6 | -4.109406 | 0.724492  | 11.870907 |
| 6 | -4.109406 | -0.724492 | 11.870907 |
| 6 | -2.682132 | -3.196604 | 11.870907 |
| 6 | -1.427274 | -3.921096 | 11.870907 |
| 6 | 1.427274  | -3.921096 | 11.870907 |
| 6 | 2.682132  | -3.196604 | 11.870907 |
| 6 | 4.109406  | -0.724492 | 11.870907 |
| 6 | 4.109406  | 0.724492  | 11.870907 |
| 6 | 2.682132  | 3.196604  | 11.870907 |
| 6 | 1.427274  | 3.921096  | 11.870907 |
| 6 | -1.427274 | 3.921096  | 11.870907 |
| 6 | -2.682132 | 3.196604  | 11.870907 |
| 6 | -3.920692 | -1.427355 | 10.624404 |
| 6 | -3.196472 | -2.681741 | 10.624404 |
| 6 | -0.724220 | -4.109096 | 10.624404 |

|   |           |           |           |
|---|-----------|-----------|-----------|
| 6 | 0.724220  | -4.109096 | 10.624404 |
| 6 | 3.196472  | -2.681741 | 10.624404 |
| 6 | 3.920692  | -1.427355 | 10.624404 |
| 6 | 3.920692  | 1.427355  | 10.624404 |
| 6 | 3.196472  | 2.681741  | 10.624404 |
| 6 | 0.724220  | 4.109096  | 10.624404 |
| 6 | -0.724220 | 4.109096  | 10.624404 |
| 6 | -3.196472 | 2.681741  | 10.624404 |
| 6 | -3.920692 | 1.427355  | 10.624404 |
| 6 | -2.678001 | -3.195120 | 9.372859  |
| 6 | -1.428055 | -3.916777 | 9.372859  |
| 6 | 1.428055  | -3.916777 | 9.372859  |
| 6 | 2.678001  | -3.195120 | 9.372859  |
| 6 | 4.106056  | -0.721657 | 9.372859  |
| 6 | 4.106056  | 0.721657  | 9.372859  |
| 6 | 2.678001  | 3.195120  | 9.372859  |
| 6 | 1.428055  | 3.916777  | 9.372859  |
| 6 | -1.428055 | 3.916777  | 9.372859  |
| 6 | -2.678001 | 3.195120  | 9.372859  |
| 6 | -4.106056 | 0.721657  | 9.372859  |
| 6 | -4.106056 | -0.721657 | 9.372859  |
| 6 | -0.724421 | -4.109328 | 8.121725  |
| 6 | 0.724421  | -4.109328 | 8.121725  |
| 6 | 3.196572  | -2.682031 | 8.121725  |
| 6 | 3.920993  | -1.427297 | 8.121725  |
| 6 | 3.920993  | 1.427297  | 8.121725  |
| 6 | 3.196572  | 2.682031  | 8.121725  |
| 6 | 0.724421  | 4.109328  | 8.121725  |
| 6 | -0.724421 | 4.109328  | 8.121725  |
| 6 | -3.196572 | 2.682031  | 8.121725  |
| 6 | -3.920993 | 1.427297  | 8.121725  |
| 6 | -3.920993 | -1.427297 | 8.121725  |
| 6 | -3.196572 | -2.682031 | 8.121725  |
| 6 | 1.427345  | -3.920724 | 6.875142  |
| 6 | 2.681774  | -3.196479 | 6.875142  |
| 6 | 4.109119  | -0.724245 | 6.875142  |
| 6 | 4.109119  | 0.724245  | 6.875142  |
| 6 | 2.681774  | 3.196479  | 6.875142  |
| 6 | 1.427345  | 3.920724  | 6.875142  |
| 6 | -1.427345 | 3.920724  | 6.875142  |
| 6 | -2.681774 | 3.196479  | 6.875142  |
| 6 | -4.109119 | 0.724245  | 6.875142  |
| 6 | -4.109119 | -0.724245 | 6.875142  |
| 6 | -2.681774 | -3.196479 | 6.875142  |
| 6 | -1.427345 | -3.920724 | 6.875142  |
| 6 | 3.195139  | -2.678054 | 5.623715  |
| 6 | 3.916832  | -1.428045 | 5.623715  |
| 6 | 3.916832  | 1.428045  | 5.623715  |
| 6 | 3.195139  | 2.678054  | 5.623715  |
| 6 | 0.721693  | 4.106099  | 5.623715  |
| 6 | -0.721693 | 4.106099  | 5.623715  |
| 6 | -3.195139 | 2.678054  | 5.623715  |
| 6 | -3.916832 | 1.428045  | 5.623715  |
| 6 | -3.916832 | -1.428045 | 5.623715  |
| 6 | -3.195139 | -2.678054 | 5.623715  |
| 6 | -0.721693 | -4.106099 | 5.623715  |
| 6 | 0.721693  | -4.106099 | 5.623715  |
| 6 | 4.109264  | -0.724364 | 4.372529  |
| 6 | 4.109264  | 0.724364  | 4.372529  |
| 6 | 2.681949  | 3.196545  | 4.372529  |
| 6 | 1.427314  | 3.920909  | 4.372529  |
| 6 | -1.427314 | 3.920909  | 4.372529  |
| 6 | -2.681949 | 3.196545  | 4.372529  |
| 6 | -4.109264 | 0.724364  | 4.372529  |
| 6 | -4.109264 | -0.724364 | 4.372529  |
| 6 | -2.681949 | -3.196545 | 4.372529  |
| 6 | -1.427314 | -3.920909 | 4.372529  |
| 6 | 1.427314  | -3.920909 | 4.372529  |
| 6 | 2.681949  | -3.196545 | 4.372529  |
| 6 | 3.920762  | 1.427332  | 3.125901  |

|   |           |           |           |
|---|-----------|-----------|-----------|
| 6 | 3.196487  | 2.681814  | 3.125901  |
| 6 | 0.724275  | 4.109146  | 3.125901  |
| 6 | -0.724275 | 4.109146  | 3.125901  |
| 6 | -3.196487 | 2.681814  | 3.125901  |
| 6 | -3.920762 | 1.427332  | 3.125901  |
| 6 | -3.920762 | -1.427332 | 3.125901  |
| 6 | -3.196487 | -2.681814 | 3.125901  |
| 6 | -0.724275 | -4.109146 | 3.125901  |
| 6 | 0.724275  | -4.109146 | 3.125901  |
| 6 | 3.196487  | -2.681814 | 3.125901  |
| 6 | 3.920762  | -1.427332 | 3.125901  |
| 6 | 2.678076  | 3.195145  | 1.874569  |
| 6 | 1.428039  | 3.916854  | 1.874569  |
| 6 | -1.428039 | 3.916854  | 1.874569  |
| 6 | -2.678076 | 3.195145  | 1.874569  |
| 6 | -4.106115 | 0.721709  | 1.874569  |
| 6 | -4.106115 | -0.721709 | 1.874569  |
| 6 | -2.678076 | -3.195145 | 1.874569  |
| 6 | -1.428039 | -3.916854 | 1.874569  |
| 6 | 1.428039  | -3.916854 | 1.874569  |
| 6 | 2.678076  | -3.195145 | 1.874569  |
| 6 | 4.106115  | -0.721709 | 1.874569  |
| 6 | 4.106115  | 0.721709  | 1.874569  |
| 6 | 0.724317  | 4.109218  | 0.623319  |
| 6 | -0.724317 | 4.109218  | 0.623319  |
| 6 | -3.196529 | 2.681886  | 0.623319  |
| 6 | -3.920846 | 1.427333  | 0.623319  |
| 6 | -3.920846 | -1.427333 | 0.623319  |
| 6 | -3.196529 | -2.681886 | 0.623319  |
| 6 | -0.724317 | -4.109218 | 0.623319  |
| 6 | 0.724317  | -4.109218 | 0.623319  |
| 6 | 3.196529  | -2.681886 | 0.623319  |
| 6 | 3.920846  | -1.427333 | 0.623319  |
| 6 | 3.920846  | 1.427333  | 0.623319  |
| 6 | 3.196529  | 2.681886  | 0.623319  |
| 6 | -1.427333 | 3.920846  | -0.623319 |
| 6 | -2.681886 | 3.196529  | -0.623319 |
| 6 | -4.109218 | 0.724317  | -0.623319 |
| 6 | -4.109218 | -0.724317 | -0.623319 |
| 6 | -2.681886 | -3.196529 | -0.623319 |
| 6 | -1.427333 | -3.920846 | -0.623319 |
| 6 | 1.427333  | -3.920846 | -0.623319 |
| 6 | 2.681886  | -3.196529 | -0.623319 |
| 6 | 4.109218  | -0.724317 | -0.623319 |
| 6 | 4.109218  | 0.724317  | -0.623319 |
| 6 | 2.681886  | 3.196529  | -0.623319 |
| 6 | 1.427333  | 3.920846  | -0.623319 |
| 6 | -3.195145 | 2.678076  | -1.874569 |
| 6 | -3.916854 | 1.428039  | -1.874569 |
| 6 | -3.916854 | -1.428039 | -1.874569 |
| 6 | -3.195145 | -2.678076 | -1.874569 |
| 6 | -0.721709 | -4.106115 | -1.874569 |
| 6 | 0.721709  | -4.106115 | -1.874569 |
| 6 | 3.195145  | -2.678076 | -1.874569 |
| 6 | 3.916854  | -1.428039 | -1.874569 |
| 6 | 3.916854  | 1.428039  | -1.874569 |
| 6 | 3.195145  | 2.678076  | -1.874569 |
| 6 | 0.721709  | 4.106115  | -1.874569 |
| 6 | -0.721709 | 4.106115  | -1.874569 |
| 6 | -4.109146 | 0.724275  | -3.125901 |
| 6 | -4.109146 | -0.724275 | -3.125901 |
| 6 | -2.681814 | -3.196487 | -3.125901 |
| 6 | -1.427332 | -3.920762 | -3.125901 |
| 6 | 1.427332  | -3.920762 | -3.125901 |
| 6 | 2.681814  | -3.196487 | -3.125901 |
| 6 | 4.109146  | -0.724275 | -3.125901 |
| 6 | 4.109146  | 0.724275  | -3.125901 |
| 6 | 2.681814  | 3.196487  | -3.125901 |
| 6 | 1.427332  | 3.920762  | -3.125901 |
| 6 | -1.427332 | 3.920762  | -3.125901 |

|   |           |           |            |
|---|-----------|-----------|------------|
| 6 | -2.681814 | 3.196487  | -3.125901  |
| 6 | -3.920909 | -1.427314 | -4.372529  |
| 6 | -3.196545 | -2.681949 | -4.372529  |
| 6 | -0.724364 | -4.109264 | -4.372529  |
| 6 | 0.724364  | -4.109264 | -4.372529  |
| 6 | 3.196545  | -2.681949 | -4.372529  |
| 6 | 3.920909  | -1.427314 | -4.372529  |
| 6 | 3.920909  | 1.427314  | -4.372529  |
| 6 | 3.196545  | 2.681949  | -4.372529  |
| 6 | 0.724364  | 4.109264  | -4.372529  |
| 6 | -0.724364 | 4.109264  | -4.372529  |
| 6 | -3.196545 | 2.681949  | -4.372529  |
| 6 | -3.920909 | 1.427314  | -4.372529  |
| 6 | -2.678054 | -3.195139 | -5.623715  |
| 6 | -1.428045 | -3.916832 | -5.623715  |
| 6 | 1.428045  | -3.916832 | -5.623715  |
| 6 | 2.678054  | -3.195139 | -5.623715  |
| 6 | 4.106099  | -0.721693 | -5.623715  |
| 6 | 4.106099  | 0.721693  | -5.623715  |
| 6 | 2.678054  | 3.195139  | -5.623715  |
| 6 | 1.428045  | 3.916832  | -5.623715  |
| 6 | -1.428045 | 3.916832  | -5.623715  |
| 6 | -2.678054 | 3.195139  | -5.623715  |
| 6 | -4.106099 | 0.721693  | -5.623715  |
| 6 | -4.106099 | -0.721693 | -5.623715  |
| 6 | -0.724245 | -4.109119 | -6.875142  |
| 6 | 0.724245  | -4.109119 | -6.875142  |
| 6 | 3.196479  | -2.681774 | -6.875142  |
| 6 | 3.920724  | -1.427345 | -6.875142  |
| 6 | 3.920724  | 1.427345  | -6.875142  |
| 6 | 3.196479  | 2.681774  | -6.875142  |
| 6 | 0.724245  | 4.109119  | -6.875142  |
| 6 | -0.724245 | 4.109119  | -6.875142  |
| 6 | -3.196479 | 2.681774  | -6.875142  |
| 6 | -3.920724 | 1.427345  | -6.875142  |
| 6 | -3.920724 | -1.427345 | -6.875142  |
| 6 | -3.196479 | -2.681774 | -6.875142  |
| 6 | 1.427297  | -3.920993 | -8.121725  |
| 6 | 2.682031  | -3.196572 | -8.121725  |
| 6 | 4.109328  | -0.724421 | -8.121725  |
| 6 | 4.109328  | 0.724421  | -8.121725  |
| 6 | 2.682031  | 3.196572  | -8.121725  |
| 6 | 1.427297  | 3.920993  | -8.121725  |
| 6 | -1.427297 | 3.920993  | -8.121725  |
| 6 | -2.682031 | 3.196572  | -8.121725  |
| 6 | -4.109328 | 0.724421  | -8.121725  |
| 6 | -4.109328 | -0.724421 | -8.121725  |
| 6 | -2.682031 | -3.196572 | -8.121725  |
| 6 | -1.427297 | -3.920993 | -8.121725  |
| 6 | 3.195120  | -2.678001 | -9.372859  |
| 6 | 3.916777  | -1.428055 | -9.372859  |
| 6 | 3.916777  | 1.428055  | -9.372859  |
| 6 | 3.195120  | 2.678001  | -9.372859  |
| 6 | 0.721657  | 4.106056  | -9.372859  |
| 6 | -0.721657 | 4.106056  | -9.372859  |
| 6 | -3.195120 | 2.678001  | -9.372859  |
| 6 | -3.916777 | 1.428055  | -9.372859  |
| 6 | -3.916777 | -1.428055 | -9.372859  |
| 6 | -3.195120 | -2.678001 | -9.372859  |
| 6 | -0.721657 | -4.106056 | -9.372859  |
| 6 | 0.721657  | -4.106056 | -9.372859  |
| 6 | 4.109096  | -0.724220 | -10.624404 |
| 6 | 4.109096  | 0.724220  | -10.624404 |
| 6 | 2.681741  | 3.196472  | -10.624404 |
| 6 | 1.427355  | 3.920692  | -10.624404 |
| 6 | -1.427355 | 3.920692  | -10.624404 |
| 6 | -2.681741 | 3.196472  | -10.624404 |
| 6 | -4.109096 | 0.724220  | -10.624404 |
| 6 | -4.109096 | -0.724220 | -10.624404 |
| 6 | -2.681741 | -3.196472 | -10.624404 |

|   |           |           |            |
|---|-----------|-----------|------------|
| 6 | -1.427355 | -3.920692 | -10.624404 |
| 6 | 1.427355  | -3.920692 | -10.624404 |
| 6 | 2.681741  | -3.196472 | -10.624404 |
| 6 | 3.921096  | 1.427274  | -11.870907 |
| 6 | 3.196604  | 2.682132  | -11.870907 |
| 6 | 0.724492  | 4.109406  | -11.870907 |
| 6 | -0.724492 | 4.109406  | -11.870907 |
| 6 | -3.196604 | 2.682132  | -11.870907 |
| 6 | -3.921096 | 1.427274  | -11.870907 |
| 6 | -3.921096 | -1.427274 | -11.870907 |
| 6 | -3.196604 | -2.682132 | -11.870907 |
| 6 | -0.724492 | -4.109406 | -11.870907 |
| 6 | 0.724492  | -4.109406 | -11.870907 |
| 6 | 3.196604  | -2.682132 | -11.870907 |
| 6 | 3.921096  | -1.427274 | -11.870907 |
| 6 | 2.677915  | 3.195089  | -13.122000 |
| 6 | 1.428070  | 3.916687  | -13.122000 |
| 6 | -1.428070 | 3.916687  | -13.122000 |
| 6 | -2.677915 | 3.195089  | -13.122000 |
| 6 | -4.105985 | 0.721598  | -13.122000 |
| 6 | -4.105985 | -0.721598 | -13.122000 |
| 6 | -2.677915 | -3.195089 | -13.122000 |
| 6 | -1.428070 | -3.916687 | -13.122000 |
| 6 | 1.428070  | -3.916687 | -13.122000 |
| 6 | 2.677915  | -3.195089 | -13.122000 |
| 6 | 4.105985  | -0.721598 | -13.122000 |
| 6 | 4.105985  | 0.721598  | -13.122000 |
| 6 | 0.724202  | 4.109082  | -14.373694 |
| 6 | -0.724202 | 4.109082  | -14.373694 |
| 6 | -3.196468 | 2.681718  | -14.373694 |
| 6 | -3.920670 | 1.427363  | -14.373694 |
| 6 | -3.920670 | -1.427363 | -14.373694 |
| 6 | -3.196468 | -2.681718 | -14.373694 |
| 6 | -0.724202 | -4.109082 | -14.373694 |
| 6 | 0.724202  | -4.109082 | -14.373694 |
| 6 | 3.196468  | -2.681718 | -14.373694 |
| 6 | 3.920670  | -1.427363 | -14.373694 |
| 6 | 3.920670  | 1.427363  | -14.373694 |
| 6 | 3.196468  | 2.681718  | -14.373694 |
| 6 | -1.427246 | 3.921228  | -15.620073 |
| 6 | -2.682260 | 3.196645  | -15.620073 |
| 6 | -4.109506 | 0.724583  | -15.620073 |
| 6 | -4.109506 | -0.724583 | -15.620073 |
| 6 | -2.682260 | -3.196645 | -15.620073 |
| 6 | -1.427246 | -3.921228 | -15.620073 |
| 6 | 1.427246  | -3.921228 | -15.620073 |
| 6 | 2.682260  | -3.196645 | -15.620073 |
| 6 | 4.109506  | -0.724583 | -15.620073 |
| 6 | 4.109506  | 0.724583  | -15.620073 |
| 6 | 2.682260  | 3.196645  | -15.620073 |
| 6 | 1.427246  | 3.921228  | -15.620073 |
| 6 | -3.195040 | 2.677784  | -16.871137 |
| 6 | -3.916549 | 1.428094  | -16.871137 |
| 6 | -3.916549 | -1.428094 | -16.871137 |
| 6 | -3.195040 | -2.677784 | -16.871137 |
| 6 | -0.721509 | -4.105878 | -16.871137 |
| 6 | 0.721509  | -4.105878 | -16.871137 |
| 6 | 3.195040  | -2.677784 | -16.871137 |
| 6 | 3.916549  | -1.428094 | -16.871137 |
| 6 | 3.916549  | 1.428094  | -16.871137 |
| 6 | 3.195040  | 2.677784  | -16.871137 |
| 6 | 0.721509  | 4.105878  | -16.871137 |
| 6 | -0.721509 | 4.105878  | -16.871137 |
| 6 | -4.109076 | 0.724192  | -18.123024 |
| 6 | -4.109076 | -0.724192 | -18.123024 |
| 6 | -2.681707 | -3.196468 | -18.123024 |
| 6 | -1.427369 | -3.920661 | -18.123024 |
| 6 | 1.427369  | -3.920661 | -18.123024 |
| 6 | 2.681707  | -3.196468 | -18.123024 |
| 6 | 4.109076  | -0.724192 | -18.123024 |

|   |           |           |            |
|---|-----------|-----------|------------|
| 6 | 4.109076  | 0.724192  | -18.123024 |
| 6 | 2.681707  | 3.196468  | -18.123024 |
| 6 | 1.427369  | 3.920661  | -18.123024 |
| 6 | -1.427369 | 3.920661  | -18.123024 |
| 6 | -2.681707 | 3.196468  | -18.123024 |
| 6 | -3.921402 | -1.427208 | -19.369221 |
| 6 | -3.196699 | -2.682430 | -19.369221 |
| 6 | -0.724703 | -4.109638 | -19.369221 |
| 6 | 0.724703  | -4.109638 | -19.369221 |
| 6 | 3.196699  | -2.682430 | -19.369221 |
| 6 | 3.921402  | -1.427208 | -19.369221 |
| 6 | 3.921402  | 1.427208  | -19.369221 |
| 6 | 3.196699  | 2.682430  | -19.369221 |
| 6 | 0.724703  | 4.109638  | -19.369221 |
| 6 | -0.724703 | 4.109638  | -19.369221 |
| 6 | -3.196699 | 2.682430  | -19.369221 |
| 6 | -3.921402 | 1.427208  | -19.369221 |
| 6 | -2.677588 | -3.194968 | -20.620264 |
| 6 | -1.428130 | -3.916344 | -20.620264 |
| 6 | 1.428130  | -3.916344 | -20.620264 |
| 6 | 2.677588  | -3.194968 | -20.620264 |
| 6 | 4.105718  | -0.721375 | -20.620264 |
| 6 | 4.105718  | 0.721375  | -20.620264 |
| 6 | 2.677588  | 3.194968  | -20.620264 |
| 6 | 1.428130  | 3.916344  | -20.620264 |
| 6 | -1.428130 | 3.916344  | -20.620264 |
| 6 | -2.677588 | 3.194968  | -20.620264 |
| 6 | -4.105718 | 0.721375  | -20.620264 |
| 6 | -4.105718 | -0.721375 | -20.620264 |
| 6 | -0.724193 | -4.109084 | -21.872420 |
| 6 | 0.724193  | -4.109084 | -21.872420 |
| 6 | 3.196475  | -2.681711 | -21.872420 |
| 6 | 3.920667  | -1.427373 | -21.872420 |
| 6 | 3.920667  | 1.427373  | -21.872420 |
| 6 | 3.196475  | 2.681711  | -21.872420 |
| 6 | 0.724193  | 4.109084  | -21.872420 |
| 6 | -0.724193 | 4.109084  | -21.872420 |
| 6 | -3.196475 | 2.681711  | -21.872420 |
| 6 | -3.920667 | 1.427373  | -21.872420 |
| 6 | -3.920667 | -1.427373 | -21.872420 |
| 6 | -3.196475 | -2.681711 | -21.872420 |
| 6 | 1.427155  | -3.921648 | -23.118343 |
| 6 | 2.682669  | -3.196776 | -23.118343 |
| 6 | 4.109824  | -0.724872 | -23.118343 |
| 6 | 4.109824  | 0.724872  | -23.118343 |
| 6 | 2.682669  | 3.196776  | -23.118343 |
| 6 | 1.427155  | 3.921648  | -23.118343 |
| 6 | -1.427155 | 3.921648  | -23.118343 |
| 6 | -2.682669 | 3.196776  | -23.118343 |
| 6 | -4.109824 | 0.724872  | -23.118343 |
| 6 | -4.109824 | -0.724872 | -23.118343 |
| 6 | -2.682669 | -3.196776 | -23.118343 |
| 6 | -1.427155 | -3.921648 | -23.118343 |
| 6 | 3.194850  | -2.677278 | -24.369372 |
| 6 | 3.916016  | -1.428183 | -24.369372 |
| 6 | 3.916016  | 1.428183  | -24.369372 |
| 6 | 3.194850  | 2.677278  | -24.369372 |
| 6 | 0.721166  | 4.105461  | -24.369372 |
| 6 | -0.721166 | 4.105461  | -24.369372 |
| 6 | -3.194850 | 2.677278  | -24.369372 |
| 6 | -3.916016 | 1.428183  | -24.369372 |
| 6 | -3.916016 | -1.428183 | -24.369372 |
| 6 | -3.194850 | -2.677278 | -24.369372 |
| 6 | -0.721166 | -4.105461 | -24.369372 |
| 6 | 0.721166  | -4.105461 | -24.369372 |
| 6 | 4.109072  | -0.724202 | -25.621931 |
| 6 | 4.109072  | 0.724202  | -25.621931 |
| 6 | 2.681713  | 3.196460  | -25.621931 |
| 6 | 1.427359  | 3.920662  | -25.621931 |
| 6 | -1.427359 | 3.920662  | -25.621931 |

|   |           |           |            |
|---|-----------|-----------|------------|
| 6 | -2.681713 | 3.196460  | -25.621931 |
| 6 | -4.109072 | 0.724202  | -25.621931 |
| 6 | -4.109072 | -0.724202 | -25.621931 |
| 6 | -2.681713 | -3.196460 | -25.621931 |
| 6 | -1.427359 | -3.920662 | -25.621931 |
| 6 | 1.427359  | -3.920662 | -25.621931 |
| 6 | 2.681713  | -3.196460 | -25.621931 |
| 6 | 3.921994  | 1.427050  | -26.867432 |
| 6 | 3.196859  | 2.683022  | -26.867432 |
| 6 | 0.725136  | 4.110072  | -26.867432 |
| 6 | -0.725136 | 4.110072  | -26.867432 |
| 6 | -3.196859 | 2.683022  | -26.867432 |
| 6 | -3.921994 | 1.427050  | -26.867432 |
| 6 | -3.921994 | -1.427050 | -26.867432 |
| 6 | -3.196859 | -2.683022 | -26.867432 |
| 6 | -0.725136 | -4.110072 | -26.867432 |
| 6 | 0.725136  | -4.110072 | -26.867432 |
| 6 | 3.196859  | -2.683022 | -26.867432 |
| 6 | 3.921994  | -1.427050 | -26.867432 |
| 6 | 2.676762  | 3.194665  | -28.118433 |
| 6 | 1.428281  | 3.915476  | -28.118433 |
| 6 | -1.428281 | 3.915476  | -28.118433 |
| 6 | -2.676762 | 3.194665  | -28.118433 |
| 6 | -4.105042 | 0.720811  | -28.118433 |
| 6 | -4.105042 | -0.720811 | -28.118433 |
| 6 | -2.676762 | -3.194665 | -28.118433 |
| 6 | -1.428281 | -3.915476 | -28.118433 |
| 6 | 1.428281  | -3.915476 | -28.118433 |
| 6 | 2.676762  | -3.194665 | -28.118433 |
| 6 | 4.105042  | -0.720811 | -28.118433 |
| 6 | 4.105042  | 0.720811  | -28.118433 |
| 6 | 0.724278  | 4.109318  | -29.371709 |
| 6 | -0.724278 | 4.109318  | -29.371709 |
| 6 | -3.196635 | 2.681902  | -29.371709 |
| 6 | -3.920913 | 1.427416  | -29.371709 |
| 6 | -3.920913 | -1.427416 | -29.371709 |
| 6 | -3.196635 | -2.681902 | -29.371709 |
| 6 | -0.724278 | -4.109318 | -29.371709 |
| 6 | 0.724278  | -4.109318 | -29.371709 |
| 6 | 3.196635  | -2.681902 | -29.371709 |
| 6 | 3.920913  | -1.427416 | -29.371709 |
| 6 | 3.920913  | 1.427416  | -29.371709 |
| 6 | 3.196635  | 2.681902  | -29.371709 |
| 6 | -1.427121 | 3.923299  | -30.616440 |
| 6 | -2.684116 | 3.197573  | -30.616440 |
| 6 | -4.111237 | 0.725726  | -30.616440 |
| 6 | -4.111237 | -0.725726 | -30.616440 |
| 6 | -2.684116 | -3.197573 | -30.616440 |
| 6 | -1.427121 | -3.923299 | -30.616440 |
| 6 | 1.427121  | -3.923299 | -30.616440 |
| 6 | 2.684116  | -3.197573 | -30.616440 |
| 6 | 4.111237  | -0.725726 | -30.616440 |
| 6 | 4.111237  | 0.725726  | -30.616440 |
| 6 | 2.684116  | 3.197573  | -30.616440 |
| 6 | 1.427121  | 3.923299  | -30.616440 |
| 6 | -3.194920 | 2.676083  | -31.867206 |
| 6 | -3.915016 | 1.428840  | -31.867206 |
| 6 | -3.915016 | -1.428840 | -31.867206 |
| 6 | -3.194920 | -2.676083 | -31.867206 |
| 6 | -0.720096 | -4.104923 | -31.867206 |
| 6 | 0.720096  | -4.104923 | -31.867206 |
| 6 | 3.194920  | -2.676083 | -31.867206 |
| 6 | 3.915016  | -1.428840 | -31.867206 |
| 6 | 3.915016  | 1.428840  | -31.867206 |
| 6 | 3.194920  | 2.676083  | -31.867206 |
| 6 | 0.720096  | 4.104923  | -31.867206 |
| 6 | -0.720096 | 4.104923  | -31.867206 |
| 6 | -4.108383 | 0.724174  | -33.121988 |
| 6 | -4.108383 | -0.724174 | -33.121988 |
| 6 | -2.681344 | -3.195877 | -33.121988 |



|   |           |           |            |
|---|-----------|-----------|------------|
| 6 | -1.427038 | -3.920051 | -33.121988 |
| 6 | 1.427038  | -3.920051 | -33.121988 |
| 6 | 2.681344  | -3.195877 | -33.121988 |
| 6 | 4.108383  | -0.724174 | -33.121988 |
| 6 | 4.108383  | 0.724174  | -33.121988 |
| 6 | 2.681344  | 3.195877  | -33.121988 |
| 6 | 1.427038  | 3.920051  | -33.121988 |
| 6 | -1.427038 | 3.920051  | -33.121988 |
| 6 | -2.681344 | 3.195877  | -33.121988 |
| 6 | -3.919536 | -1.424559 | -34.365054 |
| 6 | -3.193472 | -2.682139 | -34.365054 |
| 6 | -0.726064 | -4.106697 | -34.365054 |
| 6 | 0.726064  | -4.106697 | -34.365054 |
| 6 | 3.193472  | -2.682139 | -34.365054 |
| 6 | 3.919536  | -1.424559 | -34.365054 |
| 6 | 3.919536  | 1.424559  | -34.365054 |
| 6 | 3.193472  | 2.682139  | -34.365054 |
| 6 | 0.726064  | 4.106697  | -34.365054 |
| 6 | -0.726064 | 4.106697  | -34.365054 |
| 6 | -3.193472 | 2.682139  | -34.365054 |
| 6 | -3.919536 | 1.424559  | -34.365054 |
| 6 | -2.664955 | -3.183229 | -35.615529 |
| 6 | -1.424280 | -3.899533 | -35.615529 |
| 6 | 1.424280  | -3.899533 | -35.615529 |
| 6 | 2.664955  | -3.183229 | -35.615529 |
| 6 | 4.089235  | -0.716304 | -35.615529 |
| 6 | 4.089235  | 0.716304  | -35.615529 |
| 6 | 2.664955  | 3.183229  | -35.615529 |
| 6 | 1.424280  | 3.899533  | -35.615529 |
| 6 | -1.424280 | 3.899533  | -35.615529 |
| 6 | -2.664955 | 3.183229  | -35.615529 |
| 6 | -4.089235 | 0.716304  | -35.615529 |
| 6 | -4.089235 | -0.716304 | -35.615529 |
| 6 | -0.725401 | -4.097971 | -36.878305 |
| 6 | 0.725401  | -4.097971 | -36.878305 |
| 6 | 3.186246  | -2.677201 | -36.878305 |
| 6 | 3.911647  | -1.420769 | -36.878305 |
| 6 | 3.911647  | 1.420769  | -36.878305 |
| 6 | 3.186246  | 2.677201  | -36.878305 |
| 6 | 0.725401  | 4.097971  | -36.878305 |
| 6 | -0.725401 | 4.097971  | -36.878305 |
| 6 | -3.186246 | 2.677201  | -36.878305 |
| 6 | -3.911647 | 1.420769  | -36.878305 |
| 6 | -3.911647 | -1.420769 | -36.878305 |
| 6 | -3.186246 | -2.677201 | -36.878305 |
| 6 | 1.437271  | -3.963468 | -38.118380 |
| 6 | 2.713828  | -3.226447 | -38.118380 |
| 6 | 4.151099  | -0.737021 | -38.118380 |
| 6 | 4.151099  | 0.737021  | -38.118380 |
| 6 | 2.713828  | 3.226447  | -38.118380 |
| 6 | 1.437271  | 3.963468  | -38.118380 |
| 6 | -1.437271 | 3.963468  | -38.118380 |
| 6 | -2.713828 | 3.226447  | -38.118380 |
| 6 | -4.151099 | 0.737021  | -38.118380 |
| 6 | -4.151099 | -0.737021 | -38.118380 |
| 6 | -2.713828 | -3.226447 | -38.118380 |
| 6 | -1.437271 | -3.963468 | -38.118380 |
| 6 | 3.303202  | -2.707696 | -39.331065 |
| 6 | 3.996534  | -1.506809 | -39.331065 |
| 6 | 3.996534  | 1.506809  | -39.331065 |
| 6 | 3.303202  | 2.707696  | -39.331065 |
| 6 | 0.693332  | 4.214505  | -39.331065 |
| 6 | -0.693332 | 4.214505  | -39.331065 |
| 6 | -3.303202 | 2.707696  | -39.331065 |
| 6 | -3.996534 | 1.506809  | -39.331065 |
| 6 | -3.996534 | -1.506809 | -39.331065 |
| 6 | -3.303202 | -2.707696 | -39.331065 |
| 6 | -0.693332 | -4.214505 | -39.331065 |
| 6 | 0.693332  | -4.214505 | -39.331065 |
| 1 | -3.198401 | -3.087031 | 40.288770  |

|   |           |           |            |
|---|-----------|-----------|------------|
| 1 | -1.074247 | -4.313411 | 40.288770  |
| 1 | 1.074247  | -4.313411 | 40.288770  |
| 1 | 3.198401  | -3.087031 | 40.288770  |
| 1 | 4.272647  | -1.226381 | 40.288770  |
| 1 | 4.272647  | 1.226381  | 40.288770  |
| 1 | 3.198401  | 3.087031  | 40.288770  |
| 1 | 1.074247  | 4.313411  | 40.288770  |
| 1 | -1.074247 | 4.313411  | 40.288770  |
| 1 | -3.198401 | 3.087031  | 40.288770  |
| 1 | -4.272647 | 1.226381  | 40.288770  |
| 1 | -4.272647 | -1.226381 | 40.288770  |
| 1 | 3.087031  | -3.198401 | -40.288770 |
| 1 | 4.313411  | -1.074247 | -40.288770 |
| 1 | 4.313411  | 1.074247  | -40.288770 |
| 1 | 3.087031  | 3.198401  | -40.288770 |
| 1 | 1.226381  | 4.272647  | -40.288770 |
| 1 | -1.226381 | 4.272647  | -40.288770 |
| 1 | -3.087031 | 3.198401  | -40.288770 |
| 1 | -4.313411 | 1.074247  | -40.288770 |
| 1 | -4.313411 | -1.074247 | -40.288770 |
| 1 | -3.087031 | -3.198401 | -40.288770 |
| 1 | -1.226381 | -4.272647 | -40.288770 |
| 1 | 1.226381  | -4.272647 | -40.288770 |

Nanotube (6,6) u32v6s  
B3LYP/STO-3G Energy: -29379.408684

|   |           |           |           |
|---|-----------|-----------|-----------|
| 6 | -3.995257 | -1.506672 | 39.964825 |
| 6 | -3.302445 | -2.706658 | 39.964825 |
| 6 | -0.692812 | -4.213331 | 39.964825 |
| 6 | 0.692812  | -4.213331 | 39.964825 |
| 6 | 3.302445  | -2.706658 | 39.964825 |
| 6 | 3.995257  | -1.506672 | 39.964825 |
| 6 | 3.995257  | 1.506672  | 39.964825 |
| 6 | 3.302445  | 2.706658  | 39.964825 |
| 6 | 0.692812  | 4.213331  | 39.964825 |
| 6 | -0.692812 | 4.213331  | 39.964825 |
| 6 | -3.302445 | 2.706658  | 39.964825 |
| 6 | -3.995257 | 1.506672  | 39.964825 |
| 6 | -2.712358 | -3.225694 | 38.750907 |
| 6 | -1.437354 | -3.961818 | 38.750907 |
| 6 | 1.437354  | -3.961818 | 38.750907 |
| 6 | 2.712358  | -3.225694 | 38.750907 |
| 6 | 4.149712  | -0.736124 | 38.750907 |
| 6 | 4.149712  | 0.736124  | 38.750907 |
| 6 | 2.712358  | 3.225694  | 38.750907 |
| 6 | 1.437354  | 3.961818  | 38.750907 |
| 6 | -1.437354 | 3.961818  | 38.750907 |
| 6 | -2.712358 | 3.225694  | 38.750907 |
| 6 | -4.149712 | 0.736124  | 38.750907 |
| 6 | -4.149712 | -0.736124 | 38.750907 |
| 6 | -0.725699 | -4.098010 | 37.510861 |
| 6 | 0.725699  | -4.098010 | 37.510861 |
| 6 | 3.186131  | -2.677478 | 37.510861 |
| 6 | 3.911830  | -1.420531 | 37.510861 |
| 6 | 3.911830  | 1.420531  | 37.510861 |
| 6 | 3.186131  | 2.677478  | 37.510861 |
| 6 | 0.725699  | 4.098010  | 37.510861 |
| 6 | -0.725699 | 4.098010  | 37.510861 |
| 6 | -3.186131 | 2.677478  | 37.510861 |
| 6 | -3.911830 | 1.420531  | 37.510861 |
| 6 | -3.911830 | -1.420531 | 37.510861 |
| 6 | -3.186131 | -2.677478 | 37.510861 |
| 6 | 1.424297  | -3.898571 | 36.248640 |
| 6 | 2.664113  | -3.182763 | 36.248640 |
| 6 | 4.088410  | -0.715808 | 36.248640 |
| 6 | 4.088410  | 0.715808  | 36.248640 |
| 6 | 2.664113  | 3.182763  | 36.248640 |

|   |           |           |           |
|---|-----------|-----------|-----------|
| 6 | 1.424297  | 3.898571  | 36.248640 |
| 6 | -1.424297 | 3.898571  | 36.248640 |
| 6 | -2.664113 | 3.182763  | 36.248640 |
| 6 | -4.088410 | 0.715808  | 36.248640 |
| 6 | -4.088410 | -0.715808 | 36.248640 |
| 6 | -2.664113 | -3.182763 | 36.248640 |
| 6 | -1.424297 | -3.898571 | 36.248640 |
| 6 | 3.192705  | -2.680760 | 34.996841 |
| 6 | 3.917959  | -1.424583 | 34.996841 |
| 6 | 3.917959  | 1.424583  | 34.996841 |
| 6 | 3.192705  | 2.680760  | 34.996841 |
| 6 | 0.725254  | 4.105344  | 34.996841 |
| 6 | -0.725254 | 4.105344  | 34.996841 |
| 6 | -3.192705 | 2.680760  | 34.996841 |
| 6 | -3.917959 | 1.424583  | 34.996841 |
| 6 | -3.917959 | -1.424583 | 34.996841 |
| 6 | -3.192705 | -2.680760 | 34.996841 |
| 6 | -0.725254 | -4.105344 | 34.996841 |
| 6 | 0.725254  | -4.105344 | 34.996841 |
| 6 | 4.108426  | -0.724490 | 33.753752 |
| 6 | 4.108426  | 0.724490  | 33.753752 |
| 6 | 2.681640  | 3.195757  | 33.753752 |
| 6 | 1.426786  | 3.920247  | 33.753752 |
| 6 | -1.426786 | 3.920247  | 33.753752 |
| 6 | -2.681640 | 3.195757  | 33.753752 |
| 6 | -4.108426 | 0.724490  | 33.753752 |
| 6 | -4.108426 | -0.724490 | 33.753752 |
| 6 | -2.681640 | -3.195757 | 33.753752 |
| 6 | -1.426786 | -3.920247 | 33.753752 |
| 6 | 1.426786  | -3.920247 | 33.753752 |
| 6 | 2.681640  | -3.195757 | 33.753752 |
| 6 | 3.913979  | 1.428786  | 32.499709 |
| 6 | 3.194354  | 2.675213  | 32.499709 |
| 6 | 0.719625  | 4.103998  | 32.499709 |
| 6 | -0.719625 | 4.103998  | 32.499709 |
| 6 | -3.194354 | 2.675213  | 32.499709 |
| 6 | -3.913979 | 1.428786  | 32.499709 |
| 6 | -3.913979 | -1.428786 | 32.499709 |
| 6 | -3.194354 | -2.675213 | 32.499709 |
| 6 | -0.719625 | -4.103998 | 32.499709 |
| 6 | 0.719625  | -4.103998 | 32.499709 |
| 6 | 3.194354  | -2.675213 | 32.499709 |
| 6 | 3.913979  | -1.428786 | 32.499709 |
| 6 | 2.682553  | 3.196752  | 31.247477 |
| 6 | 1.427192  | 3.921535  | 31.247477 |
| 6 | -1.427192 | 3.921535  | 31.247477 |
| 6 | -2.682553 | 3.196752  | 31.247477 |
| 6 | -4.109745 | 0.724783  | 31.247477 |
| 6 | -4.109745 | -0.724783 | 31.247477 |
| 6 | -2.682553 | -3.196752 | 31.247477 |
| 6 | -1.427192 | -3.921535 | 31.247477 |
| 6 | 1.427192  | -3.921535 | 31.247477 |
| 6 | 2.682553  | -3.196752 | 31.247477 |
| 6 | 4.109745  | -0.724783 | 31.247477 |
| 6 | 4.109745  | 0.724783  | 31.247477 |
| 6 | 0.724681  | 4.109444  | 30.002637 |
| 6 | -0.724681 | 4.109444  | 30.002637 |
| 6 | -3.196543 | 2.682314  | 30.002637 |
| 6 | -3.921224 | 1.427130  | 30.002637 |
| 6 | -3.921224 | -1.427130 | 30.002637 |
| 6 | -3.196543 | -2.682314 | 30.002637 |
| 6 | -0.724681 | -4.109444 | 30.002637 |
| 6 | 0.724681  | -4.109444 | 30.002637 |
| 6 | 3.196543  | -2.682314 | 30.002637 |
| 6 | 3.921224  | -1.427130 | 30.002637 |
| 6 | 3.921224  | 1.427130  | 30.002637 |
| 6 | 3.196543  | 2.682314  | 30.002637 |
| 6 | -1.428225 | 3.914526  | 28.750298 |
| 6 | -2.675967 | 3.194142  | 28.750298 |
| 6 | -4.104192 | 0.720384  | 28.750298 |

|   |           |           |           |
|---|-----------|-----------|-----------|
| 6 | -4.104192 | -0.720384 | 28.750298 |
| 6 | -2.675967 | -3.194142 | 28.750298 |
| 6 | -1.428225 | -3.914526 | 28.750298 |
| 6 | 1.428225  | -3.914526 | 28.750298 |
| 6 | 2.675967  | -3.194142 | 28.750298 |
| 6 | 4.104192  | -0.720384 | 28.750298 |
| 6 | 4.104192  | 0.720384  | 28.750298 |
| 6 | 2.675967  | 3.194142  | 28.750298 |
| 6 | 1.428225  | 3.914526  | 28.750298 |
| 6 | -3.195974 | 2.681286  | 27.497709 |
| 6 | -3.920049 | 1.427151  | 27.497709 |
| 6 | -3.920049 | -1.427151 | 27.497709 |
| 6 | -3.195974 | -2.681286 | 27.497709 |
| 6 | -0.724075 | -4.108438 | 27.497709 |
| 6 | 0.724075  | -4.108438 | 27.497709 |
| 6 | 3.195974  | -2.681286 | 27.497709 |
| 6 | 3.920049  | -1.427151 | 27.497709 |
| 6 | 3.920049  | 1.427151  | 27.497709 |
| 6 | 3.195974  | 2.681286  | 27.497709 |
| 6 | 0.724075  | 4.108438  | 27.497709 |
| 6 | -0.724075 | 4.108438  | 27.497709 |
| 6 | -4.109274 | 0.724670  | 26.251988 |
| 6 | -4.109274 | -0.724670 | 26.251988 |
| 6 | -2.682220 | -3.196401 | 26.251988 |
| 6 | -1.427054 | -3.921071 | 26.251988 |
| 6 | 1.427054  | -3.921071 | 26.251988 |
| 6 | 2.682220  | -3.196401 | 26.251988 |
| 6 | 4.109274  | -0.724670 | 26.251988 |
| 6 | 4.109274  | 0.724670  | 26.251988 |
| 6 | 2.682220  | 3.196401  | 26.251988 |
| 6 | 1.427054  | 3.921071  | 26.251988 |
| 6 | -1.427054 | 3.921071  | 26.251988 |
| 6 | -2.682220 | 3.196401  | 26.251988 |
| 6 | -3.915165 | -1.428109 | 25.000582 |
| 6 | -3.194361 | -2.676578 | 25.000582 |
| 6 | -0.720804 | -4.104687 | 25.000582 |
| 6 | 0.720804  | -4.104687 | 25.000582 |
| 6 | 3.194361  | -2.676578 | 25.000582 |
| 6 | 3.915165  | -1.428109 | 25.000582 |
| 6 | 3.915165  | 1.428109  | 25.000582 |
| 6 | 3.194361  | 2.676578  | 25.000582 |
| 6 | 0.720804  | 4.104687  | 25.000582 |
| 6 | -0.720804 | 4.104687  | 25.000582 |
| 6 | -3.194361 | 2.676578  | 25.000582 |
| 6 | -3.915165 | 1.428109  | 25.000582 |
| 6 | -2.680745 | -3.195822 | 23.747859 |
| 6 | -1.427290 | -3.919504 | 23.747859 |
| 6 | 1.427290  | -3.919504 | 23.747859 |
| 6 | 2.680745  | -3.195822 | 23.747859 |
| 6 | 4.108035  | -0.723682 | 23.747859 |
| 6 | 4.108035  | 0.723682  | 23.747859 |
| 6 | 2.680745  | 3.195822  | 23.747859 |
| 6 | 1.427290  | 3.919504  | 23.747859 |
| 6 | -1.427290 | 3.919504  | 23.747859 |
| 6 | -2.680745 | 3.195822  | 23.747859 |
| 6 | -4.108035 | 0.723682  | 23.747859 |
| 6 | -4.108035 | -0.723682 | 23.747859 |
| 6 | -0.724715 | -4.109348 | 22.501580 |
| 6 | 0.724715  | -4.109348 | 22.501580 |
| 6 | 3.196443  | -2.682296 | 22.501580 |
| 6 | 3.921157  | -1.427053 | 22.501580 |
| 6 | 3.921157  | 1.427053  | 22.501580 |
| 6 | 3.196443  | 2.682296  | 22.501580 |
| 6 | 0.724715  | 4.109348  | 22.501580 |
| 6 | -0.724715 | 4.109348  | 22.501580 |
| 6 | -3.196443 | 2.682296  | 22.501580 |
| 6 | -3.921157 | 1.427053  | 22.501580 |
| 6 | -3.921157 | -1.427053 | 22.501580 |
| 6 | -3.196443 | -2.682296 | 22.501580 |
| 6 | 1.428031  | -3.915614 | 21.250802 |

|   |           |           |           |
|---|-----------|-----------|-----------|
| 6 | 2.677006  | -3.194518 | 21.250802 |
| 6 | 4.105036  | -0.721096 | 21.250802 |
| 6 | 4.105036  | 0.721096  | 21.250802 |
| 6 | 2.677006  | 3.194518  | 21.250802 |
| 6 | 1.428031  | 3.915614  | 21.250802 |
| 6 | -1.428031 | 3.915614  | 21.250802 |
| 6 | -2.677006 | 3.194518  | 21.250802 |
| 6 | -4.105036 | 0.721096  | 21.250802 |
| 6 | -4.105036 | -0.721096 | 21.250802 |
| 6 | -2.677006 | -3.194518 | 21.250802 |
| 6 | -1.428031 | -3.915614 | 21.250802 |
| 6 | 3.195672  | -2.680309 | 19.997978 |
| 6 | 3.919051  | -1.427379 | 19.997978 |
| 6 | 3.919051  | 1.427379  | 19.997978 |
| 6 | 3.195672  | 2.680309  | 19.997978 |
| 6 | 0.723379  | 4.107688  | 19.997978 |
| 6 | -0.723379 | 4.107688  | 19.997978 |
| 6 | -3.195672 | 2.680309  | 19.997978 |
| 6 | -3.919051 | 1.427379  | 19.997978 |
| 6 | -3.919051 | -1.427379 | 19.997978 |
| 6 | -3.195672 | -2.680309 | 19.997978 |
| 6 | -0.723379 | -4.107688 | 19.997978 |
| 6 | 0.723379  | -4.107688 | 19.997978 |
| 6 | 4.109389  | -0.724757 | 18.751262 |
| 6 | 4.109389  | 0.724757  | 18.751262 |
| 6 | 2.682352  | 3.196457  | 18.751262 |
| 6 | 1.427037  | 3.921214  | 18.751262 |
| 6 | -1.427037 | 3.921214  | 18.751262 |
| 6 | -2.682352 | 3.196457  | 18.751262 |
| 6 | -4.109389 | 0.724757  | 18.751262 |
| 6 | -4.109389 | -0.724757 | 18.751262 |
| 6 | -2.682352 | -3.196457 | 18.751262 |
| 6 | -1.427037 | -3.921214 | 18.751262 |
| 6 | 1.427037  | -3.921214 | 18.751262 |
| 6 | 2.682352  | -3.196457 | 18.751262 |
| 6 | 3.915965  | 1.427966  | 17.500983 |
| 6 | 3.194637  | 2.677342  | 17.500983 |
| 6 | 0.721328  | 4.105308  | 17.500983 |
| 6 | -0.721328 | 4.105308  | 17.500983 |
| 6 | -3.194637 | 2.677342  | 17.500983 |
| 6 | -3.915965 | 1.427966  | 17.500983 |
| 6 | -3.915965 | -1.427966 | 17.500983 |
| 6 | -3.194637 | -2.677342 | 17.500983 |
| 6 | -0.721328 | -4.105308 | 17.500983 |
| 6 | 0.721328  | -4.105308 | 17.500983 |
| 6 | 3.194637  | -2.677342 | 17.500983 |
| 6 | 3.915965  | -1.427966 | 17.500983 |
| 6 | 2.679937  | 3.195544  | 16.248076 |
| 6 | 1.427454  | 3.918666  | 16.248076 |
| 6 | -1.427454 | 3.918666  | 16.248076 |
| 6 | -2.679937 | 3.195544  | 16.248076 |
| 6 | -4.107391 | 0.723122  | 16.248076 |
| 6 | -4.107391 | -0.723122 | 16.248076 |
| 6 | -2.679937 | -3.195544 | 16.248076 |
| 6 | -1.427454 | -3.918666 | 16.248076 |
| 6 | 1.427454  | -3.918666 | 16.248076 |
| 6 | 2.679937  | -3.195544 | 16.248076 |
| 6 | 4.107391  | -0.723122 | 16.248076 |
| 6 | 4.107391  | 0.723122  | 16.248076 |
| 6 | 0.724795  | 4.109428  | 15.000985 |
| 6 | -0.724795 | 4.109428  | 15.000985 |
| 6 | -3.196472 | 2.682405  | 15.000985 |
| 6 | -3.921267 | 1.427023  | 15.000985 |
| 6 | -3.921267 | -1.427023 | 15.000985 |
| 6 | -3.196472 | -2.682405 | 15.000985 |
| 6 | -0.724795 | -4.109428 | 15.000985 |
| 6 | 0.724795  | -4.109428 | 15.000985 |
| 6 | 3.196472  | -2.682405 | 15.000985 |
| 6 | 3.921267  | -1.427023 | 15.000985 |
| 6 | 3.921267  | 1.427023  | 15.000985 |

|   |           |           |           |
|---|-----------|-----------|-----------|
| 6 | 3.196472  | 2.682405  | 15.000985 |
| 6 | -1.427909 | 3.916275  | 13.751139 |
| 6 | -2.677639 | 3.194742  | 13.751139 |
| 6 | -4.105548 | 0.721532  | 13.751139 |
| 6 | -4.105548 | -0.721532 | 13.751139 |
| 6 | -2.677639 | -3.194742 | 13.751139 |
| 6 | -1.427909 | -3.916275 | 13.751139 |
| 6 | 1.427909  | -3.916275 | 13.751139 |
| 6 | 2.677639  | -3.194742 | 13.751139 |
| 6 | 4.105548  | -0.721532 | 13.751139 |
| 6 | 4.105548  | 0.721532  | 13.751139 |
| 6 | 2.677639  | 3.194742  | 13.751139 |
| 6 | 1.427909  | 3.916275  | 13.751139 |
| 6 | -3.195428 | 2.679604  | 12.498163 |
| 6 | -3.918319 | 1.427520  | 12.498163 |
| 6 | -3.918319 | -1.427520 | 12.498163 |
| 6 | -3.195428 | -2.679604 | 12.498163 |
| 6 | -0.722891 | -4.107124 | 12.498163 |
| 6 | 0.722891  | -4.107124 | 12.498163 |
| 6 | 3.195428  | -2.679604 | 12.498163 |
| 6 | 3.918319  | -1.427520 | 12.498163 |
| 6 | 3.918319  | 1.427520  | 12.498163 |
| 6 | 3.195428  | 2.679604  | 12.498163 |
| 6 | 0.722891  | 4.107124  | 12.498163 |
| 6 | -0.722891 | 4.107124  | 12.498163 |
| 6 | -4.109461 | 0.724828  | 11.250729 |
| 6 | -4.109461 | -0.724828 | 11.250729 |
| 6 | -2.682450 | -3.196484 | 11.250729 |
| 6 | -1.427011 | -3.921312 | 11.250729 |
| 6 | 1.427011  | -3.921312 | 11.250729 |
| 6 | 2.682450  | -3.196484 | 11.250729 |
| 6 | 4.109461  | -0.724828 | 11.250729 |
| 6 | 4.109461  | 0.724828  | 11.250729 |
| 6 | 2.682450  | 3.196484  | 11.250729 |
| 6 | 1.427011  | 3.921312  | 11.250729 |
| 6 | -1.427011 | 3.921312  | 11.250729 |
| 6 | -2.682450 | 3.196484  | 11.250729 |
| 6 | -3.916563 | -1.427855 | 10.001274 |
| 6 | -3.194840 | -2.677916 | 10.001274 |
| 6 | -0.721723 | -4.105770 | 10.001274 |
| 6 | 0.721723  | -4.105770 | 10.001274 |
| 6 | 3.194840  | -2.677916 | 10.001274 |
| 6 | 3.916563  | -1.427855 | 10.001274 |
| 6 | 3.916563  | 1.427855  | 10.001274 |
| 6 | 3.194840  | 2.677916  | 10.001274 |
| 6 | 0.721723  | 4.105770  | 10.001274 |
| 6 | -0.721723 | 4.105770  | 10.001274 |
| 6 | -3.194840 | 2.677916  | 10.001274 |
| 6 | -3.916563 | 1.427855  | 10.001274 |
| 6 | -2.679295 | -3.195320 | 8.748245  |
| 6 | -1.427581 | -3.917998 | 8.748245  |
| 6 | 1.427581  | -3.917998 | 8.748245  |
| 6 | 2.679295  | -3.195320 | 8.748245  |
| 6 | 4.106876  | -0.722678 | 8.748245  |
| 6 | 4.106876  | 0.722678  | 8.748245  |
| 6 | 2.679295  | 3.195320  | 8.748245  |
| 6 | 1.427581  | 3.917998  | 8.748245  |
| 6 | -1.427581 | 3.917998  | 8.748245  |
| 6 | -2.679295 | 3.195320  | 8.748245  |
| 6 | -4.106876 | 0.722678  | 8.748245  |
| 6 | -4.106876 | -0.722678 | 8.748245  |
| 6 | -0.724852 | -4.109487 | 7.500482  |
| 6 | 0.724852  | -4.109487 | 7.500482  |
| 6 | 3.196494  | -2.682484 | 7.500482  |
| 6 | 3.921346  | -1.427003 | 7.500482  |
| 6 | 3.921346  | 1.427003  | 7.500482  |
| 6 | 3.196494  | 2.682484  | 7.500482  |
| 6 | 0.724852  | 4.109487  | 7.500482  |
| 6 | -0.724852 | 4.109487  | 7.500482  |
| 6 | -3.196494 | 2.682484  | 7.500482  |

|   |           |           |          |
|---|-----------|-----------|----------|
| 6 | -3.921346 | 1.427003  | 7.500482 |
| 6 | -3.921346 | -1.427003 | 7.500482 |
| 6 | -3.196494 | -2.682484 | 7.500482 |
| 6 | 1.427802  | -3.916842 | 6.251391 |
| 6 | 2.678184  | -3.194934 | 6.251391 |
| 6 | 4.105986  | -0.721908 | 6.251391 |
| 6 | 4.105986  | 0.721908  | 6.251391 |
| 6 | 2.678184  | 3.194934  | 6.251391 |
| 6 | 1.427802  | 3.916842  | 6.251391 |
| 6 | -1.427802 | 3.916842  | 6.251391 |
| 6 | -2.678184 | 3.194934  | 6.251391 |
| 6 | -4.105986 | 0.721908  | 6.251391 |
| 6 | -4.105986 | -0.721908 | 6.251391 |
| 6 | -2.678184 | -3.194934 | 6.251391 |
| 6 | -1.427802 | -3.916842 | 6.251391 |
| 6 | 3.195218  | -2.679004 | 4.998326 |
| 6 | 3.917694  | -1.427638 | 4.998326 |
| 6 | 3.917694  | 1.427638  | 4.998326 |
| 6 | 3.195218  | 2.679004  | 4.998326 |
| 6 | 0.722476  | 4.106642  | 4.998326 |
| 6 | -0.722476 | 4.106642  | 4.998326 |
| 6 | -3.195218 | 2.679004  | 4.998326 |
| 6 | -3.917694 | 1.427638  | 4.998326 |
| 6 | -3.917694 | -1.427638 | 4.998326 |
| 6 | -3.195218 | -2.679004 | 4.998326 |
| 6 | -0.722476 | -4.106642 | 4.998326 |
| 6 | 0.722476  | -4.106642 | 4.998326 |
| 6 | 4.109501  | -0.724867 | 3.750239 |
| 6 | 4.109501  | 0.724867  | 3.750239 |
| 6 | 2.682504  | 3.196499  | 3.750239 |
| 6 | 1.426997  | 3.921366  | 3.750239 |
| 6 | -1.426997 | 3.921366  | 3.750239 |
| 6 | -2.682504 | 3.196499  | 3.750239 |
| 6 | -4.109501 | 0.724867  | 3.750239 |
| 6 | -4.109501 | -0.724867 | 3.750239 |
| 6 | -2.682504 | -3.196499 | 3.750239 |
| 6 | -1.426997 | -3.921366 | 3.750239 |
| 6 | 1.426997  | -3.921366 | 3.750239 |
| 6 | 2.682504  | -3.196499 | 3.750239 |
| 6 | 3.917119  | 1.427749  | 2.501495 |
| 6 | 3.195026  | 2.678450  | 2.501495 |
| 6 | 0.722093  | 4.106199  | 2.501495 |
| 6 | -0.722093 | 4.106199  | 2.501495 |
| 6 | -3.195026 | 2.678450  | 2.501495 |
| 6 | -3.917119 | 1.427749  | 2.501495 |
| 6 | -3.917119 | -1.427749 | 2.501495 |
| 6 | -3.195026 | -2.678450 | 2.501495 |
| 6 | -0.722093 | -4.106199 | 2.501495 |
| 6 | 0.722093  | -4.106199 | 2.501495 |
| 6 | 3.195026  | -2.678450 | 2.501495 |
| 6 | 3.917119  | -1.427749 | 2.501495 |
| 6 | 2.678725  | 3.195121  | 1.248410 |
| 6 | 1.427694  | 3.917404  | 1.248410 |
| 6 | -1.427694 | 3.917404  | 1.248410 |
| 6 | -2.678725 | 3.195121  | 1.248410 |
| 6 | -4.106419 | 0.722283  | 1.248410 |
| 6 | -4.106419 | -0.722283 | 1.248410 |
| 6 | -2.678725 | -3.195121 | 1.248410 |
| 6 | -1.427694 | -3.917404 | 1.248410 |
| 6 | 1.427694  | -3.917404 | 1.248410 |
| 6 | 2.678725  | -3.195121 | 1.248410 |
| 6 | 4.106419  | -0.722283 | 1.248410 |
| 6 | 4.106419  | 0.722283  | 1.248410 |
| 6 | 0.724872  | 4.109517  | 0.000000 |
| 6 | -0.724872 | 4.109517  | 0.000000 |
| 6 | -3.196510 | 2.682516  | 0.000000 |
| 6 | -3.921382 | 1.427001  | 0.000000 |
| 6 | -3.921382 | -1.427001 | 0.000000 |
| 6 | -3.196510 | -2.682516 | 0.000000 |
| 6 | -0.724872 | -4.109517 | 0.000000 |

|   |           |           |           |
|---|-----------|-----------|-----------|
| 6 | 0.724872  | -4.109517 | 0.000000  |
| 6 | 3.196510  | -2.682516 | 0.000000  |
| 6 | 3.921382  | -1.427001 | 0.000000  |
| 6 | 3.921382  | 1.427001  | 0.000000  |
| 6 | 3.196510  | 2.682516  | 0.000000  |
| 6 | -1.427694 | 3.917404  | -1.248410 |
| 6 | -2.678725 | 3.195121  | -1.248410 |
| 6 | -4.106419 | 0.722283  | -1.248410 |
| 6 | -4.106419 | -0.722283 | -1.248410 |
| 6 | -2.678725 | -3.195121 | -1.248410 |
| 6 | -1.427694 | -3.917404 | -1.248410 |
| 6 | 1.427694  | -3.917404 | -1.248410 |
| 6 | 2.678725  | -3.195121 | -1.248410 |
| 6 | 4.106419  | -0.722283 | -1.248410 |
| 6 | 4.106419  | 0.722283  | -1.248410 |
| 6 | 2.678725  | 3.195121  | -1.248410 |
| 6 | 1.427694  | 3.917404  | -1.248410 |
| 6 | -3.195026 | 2.678450  | -2.501495 |
| 6 | -3.917119 | 1.427749  | -2.501495 |
| 6 | -3.917119 | -1.427749 | -2.501495 |
| 6 | -3.195026 | -2.678450 | -2.501495 |
| 6 | -0.722093 | -4.106199 | -2.501495 |
| 6 | 0.722093  | -4.106199 | -2.501495 |
| 6 | 3.195026  | -2.678450 | -2.501495 |
| 6 | 3.917119  | -1.427749 | -2.501495 |
| 6 | 3.917119  | 1.427749  | -2.501495 |
| 6 | 3.195026  | 2.678450  | -2.501495 |
| 6 | 0.722093  | 4.106199  | -2.501495 |
| 6 | -0.722093 | 4.106199  | -2.501495 |
| 6 | -4.109501 | 0.724867  | -3.750239 |
| 6 | -4.109501 | -0.724867 | -3.750239 |
| 6 | -2.682504 | -3.196499 | -3.750239 |
| 6 | -1.426997 | -3.921366 | -3.750239 |
| 6 | 1.426997  | -3.921366 | -3.750239 |
| 6 | 2.682504  | -3.196499 | -3.750239 |
| 6 | 4.109501  | -0.724867 | -3.750239 |
| 6 | 4.109501  | 0.724867  | -3.750239 |
| 6 | 2.682504  | 3.196499  | -3.750239 |
| 6 | 1.426997  | 3.921366  | -3.750239 |
| 6 | -1.426997 | 3.921366  | -3.750239 |
| 6 | -2.682504 | 3.196499  | -3.750239 |
| 6 | -3.917694 | -1.427638 | -4.998326 |
| 6 | -3.195218 | -2.679004 | -4.998326 |
| 6 | -0.722476 | -4.106642 | -4.998326 |
| 6 | 0.722476  | -4.106642 | -4.998326 |
| 6 | 3.195218  | -2.679004 | -4.998326 |
| 6 | 3.917694  | -1.427638 | -4.998326 |
| 6 | 3.917694  | 1.427638  | -4.998326 |
| 6 | 3.195218  | 2.679004  | -4.998326 |
| 6 | 0.722476  | 4.106642  | -4.998326 |
| 6 | -0.722476 | 4.106642  | -4.998326 |
| 6 | -3.195218 | 2.679004  | -4.998326 |
| 6 | -3.917694 | 1.427638  | -4.998326 |
| 6 | -2.678184 | -3.194934 | -6.251391 |
| 6 | -1.427802 | -3.916842 | -6.251391 |
| 6 | 1.427802  | -3.916842 | -6.251391 |
| 6 | 2.678184  | -3.194934 | -6.251391 |
| 6 | 4.105986  | -0.721908 | -6.251391 |
| 6 | 4.105986  | 0.721908  | -6.251391 |
| 6 | 2.678184  | 3.194934  | -6.251391 |
| 6 | 1.427802  | 3.916842  | -6.251391 |
| 6 | -1.427802 | 3.916842  | -6.251391 |
| 6 | -2.678184 | 3.194934  | -6.251391 |
| 6 | -4.105986 | 0.721908  | -6.251391 |
| 6 | -4.105986 | -0.721908 | -6.251391 |
| 6 | -0.724852 | -4.109487 | -7.500482 |
| 6 | 0.724852  | -4.109487 | -7.500482 |
| 6 | 3.196494  | -2.682484 | -7.500482 |
| 6 | 3.921346  | -1.427003 | -7.500482 |
| 6 | 3.921346  | 1.427003  | -7.500482 |



|   |           |           |            |
|---|-----------|-----------|------------|
| 6 | 3.196494  | 2.682484  | -7.500482  |
| 6 | 0.724852  | 4.109487  | -7.500482  |
| 6 | -0.724852 | 4.109487  | -7.500482  |
| 6 | -3.196494 | 2.682484  | -7.500482  |
| 6 | -3.921346 | 1.427003  | -7.500482  |
| 6 | -3.921346 | -1.427003 | -7.500482  |
| 6 | -3.196494 | -2.682484 | -7.500482  |
| 6 | 1.427581  | -3.917998 | -8.748245  |
| 6 | 2.679295  | -3.195320 | -8.748245  |
| 6 | 4.106876  | -0.722678 | -8.748245  |
| 6 | 4.106876  | 0.722678  | -8.748245  |
| 6 | 2.679295  | 3.195320  | -8.748245  |
| 6 | 1.427581  | 3.917998  | -8.748245  |
| 6 | -1.427581 | 3.917998  | -8.748245  |
| 6 | -2.679295 | 3.195320  | -8.748245  |
| 6 | -4.106876 | 0.722678  | -8.748245  |
| 6 | -4.106876 | -0.722678 | -8.748245  |
| 6 | -2.679295 | -3.195320 | -8.748245  |
| 6 | -1.427581 | -3.917998 | -8.748245  |
| 6 | 3.194840  | -2.677916 | -10.001274 |
| 6 | 3.916563  | -1.427855 | -10.001274 |
| 6 | 3.916563  | 1.427855  | -10.001274 |
| 6 | 3.194840  | 2.677916  | -10.001274 |
| 6 | 0.721723  | 4.105770  | -10.001274 |
| 6 | -0.721723 | 4.105770  | -10.001274 |
| 6 | -3.194840 | 2.677916  | -10.001274 |
| 6 | -3.916563 | 1.427855  | -10.001274 |
| 6 | -3.916563 | -1.427855 | -10.001274 |
| 6 | -3.194840 | -2.677916 | -10.001274 |
| 6 | -0.721723 | -4.105770 | -10.001274 |
| 6 | 0.721723  | -4.105770 | -10.001274 |
| 6 | 4.109461  | -0.724828 | -11.250729 |
| 6 | 4.109461  | 0.724828  | -11.250729 |
| 6 | 2.682450  | 3.196484  | -11.250729 |
| 6 | 1.427011  | 3.921312  | -11.250729 |
| 6 | -1.427011 | 3.921312  | -11.250729 |
| 6 | -2.682450 | 3.196484  | -11.250729 |
| 6 | -4.109461 | 0.724828  | -11.250729 |
| 6 | -4.109461 | -0.724828 | -11.250729 |
| 6 | -2.682450 | -3.196484 | -11.250729 |
| 6 | -1.427011 | -3.921312 | -11.250729 |
| 6 | 1.427011  | -3.921312 | -11.250729 |
| 6 | 2.682450  | -3.196484 | -11.250729 |
| 6 | 3.918319  | 1.427520  | -12.498163 |
| 6 | 3.195428  | 2.679604  | -12.498163 |
| 6 | 0.722891  | 4.107124  | -12.498163 |
| 6 | -0.722891 | 4.107124  | -12.498163 |
| 6 | -3.195428 | 2.679604  | -12.498163 |
| 6 | -3.918319 | 1.427520  | -12.498163 |
| 6 | -3.918319 | -1.427520 | -12.498163 |
| 6 | -3.195428 | -2.679604 | -12.498163 |
| 6 | -0.722891 | -4.107124 | -12.498163 |
| 6 | 0.722891  | -4.107124 | -12.498163 |
| 6 | 3.195428  | -2.679604 | -12.498163 |
| 6 | 3.918319  | -1.427520 | -12.498163 |
| 6 | 2.677639  | 3.194742  | -13.751139 |
| 6 | 1.427909  | 3.916275  | -13.751139 |
| 6 | -1.427909 | 3.916275  | -13.751139 |
| 6 | -2.677639 | 3.194742  | -13.751139 |
| 6 | -4.105548 | 0.721532  | -13.751139 |
| 6 | -4.105548 | -0.721532 | -13.751139 |
| 6 | -2.677639 | -3.194742 | -13.751139 |
| 6 | -1.427909 | -3.916275 | -13.751139 |
| 6 | 1.427909  | -3.916275 | -13.751139 |
| 6 | 2.677639  | -3.194742 | -13.751139 |
| 6 | 4.105548  | -0.721532 | -13.751139 |
| 6 | 4.105548  | 0.721532  | -13.751139 |
| 6 | 0.724795  | 4.109428  | -15.000985 |
| 6 | -0.724795 | 4.109428  | -15.000985 |
| 6 | -3.196472 | 2.682405  | -15.000985 |

|   |           |           |            |
|---|-----------|-----------|------------|
| 6 | -3.921267 | 1.427023  | -15.000985 |
| 6 | -3.921267 | -1.427023 | -15.000985 |
| 6 | -3.196472 | -2.682405 | -15.000985 |
| 6 | -0.724795 | -4.109428 | -15.000985 |
| 6 | 0.724795  | -4.109428 | -15.000985 |
| 6 | 3.196472  | -2.682405 | -15.000985 |
| 6 | 3.921267  | -1.427023 | -15.000985 |
| 6 | 3.921267  | 1.427023  | -15.000985 |
| 6 | 3.196472  | 2.682405  | -15.000985 |
| 6 | -1.427454 | 3.918666  | -16.248076 |
| 6 | -2.679937 | 3.195544  | -16.248076 |
| 6 | -4.107391 | 0.723122  | -16.248076 |
| 6 | -4.107391 | -0.723122 | -16.248076 |
| 6 | -2.679937 | -3.195544 | -16.248076 |
| 6 | -1.427454 | -3.918666 | -16.248076 |
| 6 | 1.427454  | -3.918666 | -16.248076 |
| 6 | 2.679937  | -3.195544 | -16.248076 |
| 6 | 4.107391  | -0.723122 | -16.248076 |
| 6 | 4.107391  | 0.723122  | -16.248076 |
| 6 | 2.679937  | 3.195544  | -16.248076 |
| 6 | 1.427454  | 3.918666  | -16.248076 |
| 6 | -3.194637 | 2.677342  | -17.500983 |
| 6 | -3.915965 | 1.427966  | -17.500983 |
| 6 | -3.915965 | -1.427966 | -17.500983 |
| 6 | -3.194637 | -2.677342 | -17.500983 |
| 6 | -0.721328 | -4.105308 | -17.500983 |
| 6 | 0.721328  | -4.105308 | -17.500983 |
| 6 | 3.194637  | -2.677342 | -17.500983 |
| 6 | 3.915965  | -1.427966 | -17.500983 |
| 6 | 3.915965  | 1.427966  | -17.500983 |
| 6 | 3.194637  | 2.677342  | -17.500983 |
| 6 | 0.721328  | 4.105308  | -17.500983 |
| 6 | -0.721328 | 4.105308  | -17.500983 |
| 6 | -4.109389 | 0.724757  | -18.751262 |
| 6 | -4.109389 | -0.724757 | -18.751262 |
| 6 | -2.682352 | -3.196457 | -18.751262 |
| 6 | -1.427037 | -3.921214 | -18.751262 |
| 6 | 1.427037  | -3.921214 | -18.751262 |
| 6 | 2.682352  | -3.196457 | -18.751262 |
| 6 | 4.109389  | -0.724757 | -18.751262 |
| 6 | 4.109389  | 0.724757  | -18.751262 |
| 6 | 2.682352  | 3.196457  | -18.751262 |
| 6 | 1.427037  | 3.921214  | -18.751262 |
| 6 | -1.427037 | 3.921214  | -18.751262 |
| 6 | -2.682352 | 3.196457  | -18.751262 |
| 6 | -3.919051 | -1.427379 | -19.997978 |
| 6 | -3.195672 | -2.680309 | -19.997978 |
| 6 | -0.723379 | -4.107688 | -19.997978 |
| 6 | 0.723379  | -4.107688 | -19.997978 |
| 6 | 3.195672  | -2.680309 | -19.997978 |
| 6 | 3.919051  | -1.427379 | -19.997978 |
| 6 | 3.919051  | 1.427379  | -19.997978 |
| 6 | 3.195672  | 2.680309  | -19.997978 |
| 6 | 0.723379  | 4.107688  | -19.997978 |
| 6 | -0.723379 | 4.107688  | -19.997978 |
| 6 | -3.195672 | 2.680309  | -19.997978 |
| 6 | -3.919051 | 1.427379  | -19.997978 |
| 6 | -2.677006 | -3.194518 | -21.250802 |
| 6 | -1.428031 | -3.915614 | -21.250802 |
| 6 | 1.428031  | -3.915614 | -21.250802 |
| 6 | 2.677006  | -3.194518 | -21.250802 |
| 6 | 4.105036  | -0.721096 | -21.250802 |
| 6 | 4.105036  | 0.721096  | -21.250802 |
| 6 | 2.677006  | 3.194518  | -21.250802 |
| 6 | 1.428031  | 3.915614  | -21.250802 |
| 6 | -1.428031 | 3.915614  | -21.250802 |
| 6 | -2.677006 | 3.194518  | -21.250802 |
| 6 | -4.105036 | 0.721096  | -21.250802 |
| 6 | -4.105036 | -0.721096 | -21.250802 |
| 6 | -0.724715 | -4.109348 | -22.501580 |

|   |           |           |            |
|---|-----------|-----------|------------|
| 6 | 0.724715  | -4.109348 | -22.501580 |
| 6 | 3.196443  | -2.682296 | -22.501580 |
| 6 | 3.921157  | -1.427053 | -22.501580 |
| 6 | 3.921157  | 1.427053  | -22.501580 |
| 6 | 3.196443  | 2.682296  | -22.501580 |
| 6 | 0.724715  | 4.109348  | -22.501580 |
| 6 | -0.724715 | 4.109348  | -22.501580 |
| 6 | -3.196443 | 2.682296  | -22.501580 |
| 6 | -3.921157 | 1.427053  | -22.501580 |
| 6 | -3.921157 | -1.427053 | -22.501580 |
| 6 | -3.196443 | -2.682296 | -22.501580 |
| 6 | 1.427290  | -3.919504 | -23.747859 |
| 6 | 2.680745  | -3.195822 | -23.747859 |
| 6 | 4.108035  | -0.723682 | -23.747859 |
| 6 | 4.108035  | 0.723682  | -23.747859 |
| 6 | 2.680745  | 3.195822  | -23.747859 |
| 6 | 1.427290  | 3.919504  | -23.747859 |
| 6 | -1.427290 | 3.919504  | -23.747859 |
| 6 | -2.680745 | 3.195822  | -23.747859 |
| 6 | -4.108035 | 0.723682  | -23.747859 |
| 6 | -4.108035 | -0.723682 | -23.747859 |
| 6 | -2.680745 | -3.195822 | -23.747859 |
| 6 | -1.427290 | -3.919504 | -23.747859 |
| 6 | 3.194361  | -2.676578 | -25.000582 |
| 6 | 3.915165  | -1.428109 | -25.000582 |
| 6 | 3.915165  | 1.428109  | -25.000582 |
| 6 | 3.194361  | 2.676578  | -25.000582 |
| 6 | 0.720804  | 4.104687  | -25.000582 |
| 6 | -0.720804 | 4.104687  | -25.000582 |
| 6 | -3.194361 | 2.676578  | -25.000582 |
| 6 | -3.915165 | 1.428109  | -25.000582 |
| 6 | -3.915165 | -1.428109 | -25.000582 |
| 6 | -3.194361 | -2.676578 | -25.000582 |
| 6 | -0.720804 | -4.104687 | -25.000582 |
| 6 | 0.720804  | -4.104687 | -25.000582 |
| 6 | 4.109274  | -0.724670 | -26.251988 |
| 6 | 4.109274  | 0.724670  | -26.251988 |
| 6 | 2.682220  | 3.196401  | -26.251988 |
| 6 | 1.427054  | 3.921071  | -26.251988 |
| 6 | -1.427054 | 3.921071  | -26.251988 |
| 6 | -2.682220 | 3.196401  | -26.251988 |
| 6 | -4.109274 | 0.724670  | -26.251988 |
| 6 | -4.109274 | -0.724670 | -26.251988 |
| 6 | -2.682220 | -3.196401 | -26.251988 |
| 6 | -1.427054 | -3.921071 | -26.251988 |
| 6 | 1.427054  | -3.921071 | -26.251988 |
| 6 | 2.682220  | -3.196401 | -26.251988 |
| 6 | 3.920049  | 1.427151  | -27.497709 |
| 6 | 3.195974  | 2.681286  | -27.497709 |
| 6 | 0.724075  | 4.108438  | -27.497709 |
| 6 | -0.724075 | 4.108438  | -27.497709 |
| 6 | -3.195974 | 2.681286  | -27.497709 |
| 6 | -3.920049 | 1.427151  | -27.497709 |
| 6 | -3.920049 | -1.427151 | -27.497709 |
| 6 | -3.195974 | -2.681286 | -27.497709 |
| 6 | -0.724075 | -4.108438 | -27.497709 |
| 6 | 0.724075  | -4.108438 | -27.497709 |
| 6 | 3.195974  | -2.681286 | -27.497709 |
| 6 | 3.920049  | -1.427151 | -27.497709 |
| 6 | 2.675967  | 3.194142  | -28.750298 |
| 6 | 1.428225  | 3.914526  | -28.750298 |
| 6 | -1.428225 | 3.914526  | -28.750298 |
| 6 | -2.675967 | 3.194142  | -28.750298 |
| 6 | -4.104192 | 0.720384  | -28.750298 |
| 6 | -4.104192 | -0.720384 | -28.750298 |
| 6 | -2.675967 | -3.194142 | -28.750298 |
| 6 | -1.428225 | -3.914526 | -28.750298 |
| 6 | 1.428225  | -3.914526 | -28.750298 |
| 6 | 2.675967  | -3.194142 | -28.750298 |
| 6 | 4.104192  | -0.720384 | -28.750298 |

|   |           |           |            |
|---|-----------|-----------|------------|
| 6 | 4.104192  | 0.720384  | -28.750298 |
| 6 | 0.724681  | 4.109444  | -30.002637 |
| 6 | -0.724681 | 4.109444  | -30.002637 |
| 6 | -3.196543 | 2.682314  | -30.002637 |
| 6 | -3.921224 | 1.427130  | -30.002637 |
| 6 | -3.921224 | -1.427130 | -30.002637 |
| 6 | -3.196543 | -2.682314 | -30.002637 |
| 6 | -0.724681 | -4.109444 | -30.002637 |
| 6 | 0.724681  | -4.109444 | -30.002637 |
| 6 | 3.196543  | -2.682314 | -30.002637 |
| 6 | 3.921224  | -1.427130 | -30.002637 |
| 6 | 3.921224  | 1.427130  | -30.002637 |
| 6 | 3.196543  | 2.682314  | -30.002637 |
| 6 | -1.427192 | 3.921535  | -31.247477 |
| 6 | -2.682553 | 3.196752  | -31.247477 |
| 6 | -4.109745 | 0.724783  | -31.247477 |
| 6 | -4.109745 | -0.724783 | -31.247477 |
| 6 | -2.682553 | -3.196752 | -31.247477 |
| 6 | -1.427192 | -3.921535 | -31.247477 |
| 6 | 1.427192  | -3.921535 | -31.247477 |
| 6 | 2.682553  | -3.196752 | -31.247477 |
| 6 | 4.109745  | -0.724783 | -31.247477 |
| 6 | 4.109745  | 0.724783  | -31.247477 |
| 6 | 2.682553  | 3.196752  | -31.247477 |
| 6 | 1.427192  | 3.921535  | -31.247477 |
| 6 | -3.194354 | 2.675213  | -32.499709 |
| 6 | -3.913979 | 1.428786  | -32.499709 |
| 6 | -3.913979 | -1.428786 | -32.499709 |
| 6 | -3.194354 | -2.675213 | -32.499709 |
| 6 | -0.719625 | -4.103998 | -32.499709 |
| 6 | 0.719625  | -4.103998 | -32.499709 |
| 6 | 3.194354  | -2.675213 | -32.499709 |
| 6 | 3.913979  | -1.428786 | -32.499709 |
| 6 | 3.913979  | 1.428786  | -32.499709 |
| 6 | 3.194354  | 2.675213  | -32.499709 |
| 6 | 0.719625  | 4.103998  | -32.499709 |
| 6 | -0.719625 | 4.103998  | -32.499709 |
| 6 | -4.108426 | 0.724490  | -33.753752 |
| 6 | -4.108426 | -0.724490 | -33.753752 |
| 6 | -2.681640 | -3.195757 | -33.753752 |
| 6 | -1.426786 | -3.920247 | -33.753752 |
| 6 | 1.426786  | -3.920247 | -33.753752 |
| 6 | 2.681640  | -3.195757 | -33.753752 |
| 6 | 4.108426  | -0.724490 | -33.753752 |
| 6 | 4.108426  | 0.724490  | -33.753752 |
| 6 | 2.681640  | 3.195757  | -33.753752 |
| 6 | 1.426786  | 3.920247  | -33.753752 |
| 6 | -1.426786 | 3.920247  | -33.753752 |
| 6 | -2.681640 | 3.195757  | -33.753752 |
| 6 | -3.917959 | -1.424583 | -34.996841 |
| 6 | -3.192705 | -2.680760 | -34.996841 |
| 6 | -0.725254 | -4.105344 | -34.996841 |
| 6 | 0.725254  | -4.105344 | -34.996841 |
| 6 | 3.192705  | -2.680760 | -34.996841 |
| 6 | 3.917959  | -1.424583 | -34.996841 |
| 6 | 3.917959  | 1.424583  | -34.996841 |
| 6 | 3.192705  | 2.680760  | -34.996841 |
| 6 | 0.725254  | 4.105344  | -34.996841 |
| 6 | -0.725254 | 4.105344  | -34.996841 |
| 6 | -3.192705 | 2.680760  | -34.996841 |
| 6 | -3.917959 | 1.424583  | -34.996841 |
| 6 | -2.664113 | -3.182763 | -36.248640 |
| 6 | -1.424297 | -3.898571 | -36.248640 |
| 6 | 1.424297  | -3.898571 | -36.248640 |
| 6 | 2.664113  | -3.182763 | -36.248640 |
| 6 | 4.088410  | -0.715808 | -36.248640 |
| 6 | 4.088410  | 0.715808  | -36.248640 |
| 6 | 2.664113  | 3.182763  | -36.248640 |
| 6 | 1.424297  | 3.898571  | -36.248640 |
| 6 | -1.424297 | 3.898571  | -36.248640 |

|   |           |           |            |
|---|-----------|-----------|------------|
| 6 | -2.664113 | 3.182763  | -36.248640 |
| 6 | -4.088410 | 0.715808  | -36.248640 |
| 6 | -4.088410 | -0.715808 | -36.248640 |
| 6 | -0.725699 | -4.098010 | -37.510861 |
| 6 | 0.725699  | -4.098010 | -37.510861 |
| 6 | 3.186131  | -2.677478 | -37.510861 |
| 6 | 3.911830  | -1.420531 | -37.510861 |
| 6 | 3.911830  | 1.420531  | -37.510861 |
| 6 | 3.186131  | 2.677478  | -37.510861 |
| 6 | 0.725699  | 4.098010  | -37.510861 |
| 6 | -0.725699 | 4.098010  | -37.510861 |
| 6 | -3.186131 | 2.677478  | -37.510861 |
| 6 | -3.911830 | 1.420531  | -37.510861 |
| 6 | -3.911830 | -1.420531 | -37.510861 |
| 6 | -3.186131 | -2.677478 | -37.510861 |
| 6 | 1.437354  | -3.961818 | -38.750907 |
| 6 | 2.712358  | -3.225694 | -38.750907 |
| 6 | 4.149712  | -0.736124 | -38.750907 |
| 6 | 4.149712  | 0.736124  | -38.750907 |
| 6 | 2.712358  | 3.225694  | -38.750907 |
| 6 | 1.437354  | 3.961818  | -38.750907 |
| 6 | -1.437354 | 3.961818  | -38.750907 |
| 6 | -2.712358 | 3.225694  | -38.750907 |
| 6 | -4.149712 | 0.736124  | -38.750907 |
| 6 | -4.149712 | -0.736124 | -38.750907 |
| 6 | -2.712358 | -3.225694 | -38.750907 |
| 6 | -1.437354 | -3.961818 | -38.750907 |
| 6 | 3.302445  | -2.706658 | -39.964825 |
| 6 | 3.995257  | -1.506672 | -39.964825 |
| 6 | 3.995257  | 1.506672  | -39.964825 |
| 6 | 3.302445  | 2.706658  | -39.964825 |
| 6 | 0.692812  | 4.213331  | -39.964825 |
| 6 | -0.692812 | 4.213331  | -39.964825 |
| 6 | -3.302445 | 2.706658  | -39.964825 |
| 6 | -3.995257 | 1.506672  | -39.964825 |
| 6 | -3.995257 | -1.506672 | -39.964825 |
| 6 | -3.302445 | -2.706658 | -39.964825 |
| 6 | -0.692812 | -4.213331 | -39.964825 |
| 6 | 0.692812  | -4.213331 | -39.964825 |
| 1 | -4.314375 | -1.074407 | 40.921914  |
| 1 | -3.087651 | -3.199155 | 40.921914  |
| 1 | -1.226724 | -4.273562 | 40.921914  |
| 1 | 1.226724  | -4.273562 | 40.921914  |
| 1 | 3.087651  | -3.199155 | 40.921914  |
| 1 | 4.314375  | -1.074407 | 40.921914  |
| 1 | 4.314375  | 1.074407  | 40.921914  |
| 1 | 3.087651  | 3.199155  | 40.921914  |
| 1 | 1.226724  | 4.273562  | 40.921914  |
| 1 | -1.226724 | 4.273562  | 40.921914  |
| 1 | -3.087651 | 3.199155  | 40.921914  |
| 1 | -4.314375 | 1.074407  | 40.921914  |
| 1 | 3.087651  | -3.199155 | -40.921914 |
| 1 | 4.314375  | -1.074407 | -40.921914 |
| 1 | 4.314375  | 1.074407  | -40.921914 |
| 1 | 3.087651  | 3.199155  | -40.921914 |
| 1 | 1.226724  | 4.273562  | -40.921914 |
| 1 | -1.226724 | 4.273562  | -40.921914 |
| 1 | -3.087651 | 3.199155  | -40.921914 |
| 1 | -4.314375 | 1.074407  | -40.921914 |
| 1 | -4.314375 | -1.074407 | -40.921914 |
| 1 | -3.087651 | -3.199155 | -40.921914 |
| 1 | -1.226724 | -4.273562 | -40.921914 |
| 1 | 1.226724  | -4.273562 | -40.921914 |

Nanotube (6,6) u33v0s  
B3LYP/STO-3G Energy: -29831.171473

C -4.000009 -1.505719 40.572847

|   |           |           |           |
|---|-----------|-----------|-----------|
| C | -3.306065 | -2.707729 | 40.573009 |
| C | -0.696076 | -4.214379 | 40.573484 |
| C | 0.691866  | -4.214378 | 40.573655 |
| C | 3.301837  | -2.707719 | 40.573818 |
| C | 3.995780  | -1.505709 | 40.573827 |
| C | 3.995785  | 1.507989  | 40.573627 |
| C | 3.301843  | 2.710000  | 40.573459 |
| C | 0.691866  | 4.216668  | 40.573097 |
| C | -0.696076 | 4.216670  | 40.572926 |
| C | -3.306071 | 2.710011  | 40.572650 |
| C | -4.000015 | 1.507999  | 40.572648 |
| C | -2.717357 | -3.226348 | 39.361743 |
| C | -1.439263 | -3.964199 | 39.361974 |
| C | 1.435355  | -3.964198 | 39.362328 |
| C | 2.713446  | -3.226344 | 39.362410 |
| C | 4.150679  | -0.736833 | 39.362422 |
| C | 4.150681  | 0.738946  | 39.362324 |
| C | 2.713448  | 3.228459  | 39.361981 |
| C | 1.435357  | 3.966315  | 39.361801 |
| C | -1.439264 | 3.966316  | 39.361448 |
| C | -2.717359 | 3.228464  | 39.361314 |
| C | -4.154594 | 0.738948  | 39.361304 |
| C | -4.154593 | -0.736834 | 39.361402 |
| C | -0.726923 | -4.096960 | 38.121874 |
| C | 0.723328  | -4.096959 | 38.122052 |
| C | 3.184530  | -2.675974 | 38.122230 |
| C | 3.909624  | -1.419998 | 38.122238 |
| C | 3.909625  | 1.421943  | 38.122049 |
| C | 3.184532  | 2.677919  | 38.121874 |
| C | 0.723328  | 4.098906  | 38.121506 |
| C | -0.726923 | 4.098907  | 38.121329 |
| C | -3.188129 | 2.677922  | 38.121089 |
| C | -3.913223 | 1.421945  | 38.121086 |
| C | -3.913223 | -1.419999 | 38.121276 |
| C | -3.188128 | -2.675976 | 38.121445 |
| C | 1.422639  | -3.899864 | 36.858806 |
| C | 2.664323  | -3.182964 | 36.858899 |
| C | 4.088570  | -0.715998 | 36.858906 |
| C | 4.088571  | 0.717770  | 36.858812 |
| C | 2.664324  | 3.184738  | 36.858476 |
| C | 1.422641  | 3.901638  | 36.858289 |
| C | -1.425917 | 3.901640  | 36.857938 |
| C | -2.667601 | 3.184741  | 36.857823 |
| C | -4.091852 | 0.717771  | 36.857808 |
| C | -4.091851 | -0.715998 | 36.857902 |
| C | -2.667600 | -3.182967 | 36.858246 |
| C | -1.425916 | -3.899865 | 36.858456 |
| C | 3.192727  | -2.682707 | 35.609910 |
| C | 3.919559  | -1.423734 | 35.609913 |
| C | 3.919560  | 1.425335  | 35.609724 |
| C | 3.192729  | 2.684309  | 35.609556 |
| C | 0.725379  | 4.108854  | 35.609163 |
| C | -0.728338 | 4.108855  | 35.608987 |
| C | -3.195693 | 2.684312  | 35.608775 |
| C | -3.922526 | 1.425338  | 35.608767 |
| C | -3.922525 | -1.423736 | 35.608956 |
| C | -3.195691 | -2.682709 | 35.609128 |
| C | -0.728339 | -4.107250 | 35.609530 |
| C | 0.725378  | -4.107249 | 35.609706 |
| C | 4.106947  | -0.723080 | 34.366601 |
| C | 4.106948  | 0.724511  | 34.366507 |
| C | 2.679661  | 3.196755  | 34.366168 |
| C | 1.426009  | 3.920555  | 34.365973 |
| C | -1.428656 | 3.920557  | 34.365625 |
| C | -2.682310 | 3.196759  | 34.365518 |
| C | -4.109601 | 0.724512  | 34.365509 |
| C | -4.109601 | -0.723080 | 34.365603 |
| C | -2.682309 | -3.195325 | 34.365938 |
| C | -1.428655 | -3.919122 | 34.366139 |
| C | 1.426007  | -3.919120 | 34.366487 |

|   |           |           |           |
|---|-----------|-----------|-----------|
| C | 2.679659  | -3.195321 | 34.366588 |
| C | 3.915117  | 1.429461  | 33.111025 |
| C | 3.194395  | 2.677857  | 33.110859 |
| C | 0.719584  | 4.106697  | 33.110465 |
| C | -0.721914 | 4.106699  | 33.110293 |
| C | -3.196731 | 2.677860  | 33.110088 |
| C | -3.917455 | 1.429465  | 33.110082 |
| C | -3.917453 | -1.428203 | 33.110269 |
| C | -3.196728 | -2.676598 | 33.110436 |
| C | -0.721914 | -4.105434 | 33.110828 |
| C | 0.719584  | -4.105432 | 33.111000 |
| C | 3.194393  | -2.676595 | 33.111207 |
| C | 3.915116  | -1.428200 | 33.111212 |
| C | 2.684518  | 3.198912  | 31.861609 |
| C | 1.426077  | 3.925470  | 31.861415 |
| C | -1.428095 | 3.925473  | 31.861073 |
| C | -2.686538 | 3.198917  | 31.860970 |
| C | -4.113580 | 0.727105  | 31.860960 |
| C | -4.113579 | -0.726013 | 31.861053 |
| C | -2.686536 | -3.197822 | 31.861384 |
| C | -1.428093 | -3.924377 | 31.861579 |
| C | 1.426074  | -3.924374 | 31.861921 |
| C | 2.684516  | -3.197817 | 31.862023 |
| C | 4.111552  | -0.726013 | 31.862034 |
| C | 4.111553  | 0.727104  | 31.861942 |
| C | 0.722942  | 4.109578  | 30.616286 |
| C | -0.724650 | 4.109580  | 30.616118 |
| C | -3.197548 | 2.681859  | 30.615916 |
| C | -3.921321 | 1.428190  | 30.615911 |
| C | -3.921320 | -1.427265 | 30.616094 |
| C | -3.197546 | -2.680933 | 30.616257 |
| C | -0.724650 | -4.108651 | 30.616642 |
| C | 0.722942  | -4.108649 | 30.616811 |
| C | 3.195831  | -2.680929 | 30.617012 |
| C | 3.919603  | -1.427260 | 30.617018 |
| C | 3.919605  | 1.428185  | 30.616835 |
| C | 3.195834  | 2.681855  | 30.616671 |
| C | -1.428954 | 3.917222  | 29.362045 |
| C | -2.678646 | 3.195724  | 29.361946 |
| C | -4.106870 | 0.721884  | 29.361937 |
| C | -4.106869 | -0.721126 | 29.362027 |
| C | -2.678644 | -3.194962 | 29.362349 |
| C | -1.428951 | -3.916459 | 29.362536 |
| C | 1.427550  | -3.916456 | 29.362870 |
| C | 2.677240  | -3.194956 | 29.362969 |
| C | 4.105459  | -0.721126 | 29.362982 |
| C | 4.105460  | 0.721883  | 29.362892 |
| C | 2.677243  | 3.195717  | 29.362567 |
| C | 1.427553  | 3.917219  | 29.362379 |
| C | -3.198207 | 2.684808  | 28.112717 |
| C | -3.924200 | 1.427302  | 28.112712 |
| C | -3.924198 | -1.426707 | 28.112890 |
| C | -3.198204 | -2.684213 | 28.113047 |
| C | -0.726561 | -4.111197 | 28.113417 |
| C | 0.725465  | -4.111195 | 28.113581 |
| C | 3.197099  | -2.684208 | 28.113779 |
| C | 3.923092  | -1.426701 | 28.113785 |
| C | 3.923094  | 1.427295  | 28.113608 |
| C | 3.197104  | 2.684803  | 28.113449 |
| C | 0.725465  | 4.111794  | 28.113073 |
| C | -0.726560 | 4.111797  | 28.112909 |
| C | -4.109119 | 0.723835  | 26.866853 |
| C | -4.109117 | -0.723403 | 26.866940 |
| C | -2.681448 | -3.196265 | 26.867248 |
| C | -1.428092 | -3.919873 | 26.867428 |
| C | 1.427292  | -3.919869 | 26.867750 |
| C | 2.680645  | -3.196257 | 26.867846 |
| C | 4.108306  | -0.723403 | 26.867860 |
| C | 4.108308  | 0.723834  | 26.867774 |
| C | 2.680648  | 3.196694  | 26.867458 |

|   |           |           |           |
|---|-----------|-----------|-----------|
| C | 1.427296  | 3.920307  | 26.867276 |
| C | -1.428096 | 3.920311  | 26.866954 |
| C | -2.681450 | 3.196702  | 26.866860 |
| C | -3.917679 | -1.428006 | 25.613630 |
| C | -3.195786 | -2.678401 | 25.613779 |
| C | -0.722160 | -4.106527 | 25.614134 |
| C | 0.721656  | -4.106525 | 25.614290 |
| C | 3.195273  | -2.678396 | 25.614480 |
| C | 3.917163  | -1.427999 | 25.614486 |
| C | 3.917166  | 1.428273  | 25.614316 |
| C | 3.195278  | 2.678671  | 25.614164 |
| C | 0.721656  | 4.106805  | 25.613804 |
| C | -0.722159 | 4.106808  | 25.613648 |
| C | -3.195791 | 2.678677  | 25.613463 |
| C | -3.917681 | 1.428281  | 25.613460 |
| C | -2.684321 | -3.197545 | 24.364807 |
| C | -1.427199 | -3.923325 | 24.364979 |
| C | 1.426979  | -3.923320 | 24.365285 |
| C | 2.684098  | -3.197535 | 24.365377 |
| C | 4.111154  | -0.725735 | 24.365388 |
| C | 4.111156  | 0.725852  | 24.365305 |
| C | 2.684102  | 3.197659  | 24.365007 |
| C | 1.426983  | 3.923445  | 24.364834 |
| C | -1.427202 | 3.923450  | 24.364527 |
| C | -2.684324 | 3.197669  | 24.364438 |
| C | -4.111389 | 0.725852  | 24.364429 |
| C | -4.111387 | -0.725734 | 24.364512 |
| C | -0.723478 | -4.108633 | 23.118648 |
| C | 0.723539  | -4.108630 | 23.118796 |
| C | 3.196451  | -2.680913 | 23.118973 |
| C | 3.919943  | -1.427746 | 23.118979 |
| C | 3.919946  | 1.427714  | 23.118818 |
| C | 3.196457  | 2.680883  | 23.118674 |
| C | 0.723539  | 4.108607  | 23.118336 |
| C | -0.723477 | 4.108610  | 23.118189 |
| C | -3.196407 | 2.680890  | 23.118012 |
| C | -3.919899 | 1.427724  | 23.118008 |
| C | -3.919897 | -1.427754 | 23.118169 |
| C | -3.196401 | -2.680919 | 23.118311 |
| C | 1.428233  | -3.917923 | 21.865779 |
| C | 2.679079  | -3.195762 | 21.865864 |
| C | 4.107123  | -0.722260 | 21.865874 |
| C | 4.107125  | 0.722080  | 21.865797 |
| C | 2.679083  | 3.195589  | 21.865518 |
| C | 1.428238  | 3.917751  | 21.865356 |
| C | -1.427908 | 3.917757  | 21.865068 |
| C | -2.678756 | 3.195600  | 21.864985 |
| C | -4.106810 | 0.722080  | 21.864976 |
| C | -4.106808 | -0.722260 | 21.865053 |
| C | -2.678752 | -3.195773 | 21.865331 |
| C | -1.427903 | -3.917928 | 21.865491 |
| C | 3.197825  | -2.684189 | 20.616971 |
| C | 3.923477  | -1.427285 | 20.616976 |
| C | 3.923480  | 1.426965  | 20.616827 |
| C | 3.197832  | 2.683871  | 20.616693 |
| C | 0.725964  | 4.110986  | 20.616378 |
| C | -0.725369 | 4.110990  | 20.616241 |
| C | -3.197251 | 2.683880  | 20.616077 |
| C | -3.922903 | 1.426976  | 20.616074 |
| C | -3.922899 | -1.427295 | 20.616223 |
| C | -3.197245 | -2.684197 | 20.616355 |
| C | -0.725369 | -4.111300 | 20.616668 |
| C | 0.725964  | -4.111296 | 20.616805 |
| C | 4.108890  | -0.723635 | 19.370143 |
| C | 4.108893  | 0.723177  | 19.370073 |
| C | 2.681166  | 3.196139  | 19.369814 |
| C | 1.428181  | 3.919537  | 19.369665 |
| C | -1.427339 | 3.919544  | 19.369399 |
| C | -2.680327 | 3.196152  | 19.369322 |
| C | -4.108069 | 0.723178  | 19.369316 |



|   |           |           |           |
|---|-----------|-----------|-----------|
| C | -4.108067 | -0.723634 | 19.369387 |
| C | -2.680323 | -3.196601 | 19.369641 |
| C | -1.427333 | -3.919990 | 19.369789 |
| C | 1.428175  | -3.919984 | 19.370054 |
| C | 2.681162  | -3.196588 | 19.370133 |
| C | 3.918661  | 1.427719  | 18.117119 |
| C | 3.196317  | 2.678902  | 18.116998 |
| C | 0.722905  | 4.106910  | 18.116710 |
| C | -0.721818 | 4.106914  | 18.116586 |
| C | -3.195246 | 2.678911  | 18.116437 |
| C | -3.917593 | 1.427731  | 18.116434 |
| C | -3.917590 | -1.428316 | 18.116570 |
| C | -3.195239 | -2.679494 | 18.116690 |
| C | -0.721818 | -4.107489 | 18.116975 |
| C | 0.722905  | -4.107485 | 18.117099 |
| C | 3.196310  | -2.679486 | 18.117251 |
| C | 3.918658  | -1.428305 | 18.117256 |
| C | 2.684577  | 3.197144  | 16.868184 |
| C | 1.427813  | 3.922724  | 16.868050 |
| C | -1.426502 | 3.922731  | 16.867811 |
| C | -2.683269 | 3.197159  | 16.867741 |
| C | -4.110405 | 0.725232  | 16.867734 |
| C | -4.110403 | -0.725943 | 16.867797 |
| C | -2.683264 | -3.197861 | 16.868028 |
| C | -1.426496 | -3.923431 | 16.868162 |
| C | 1.427806  | -3.923424 | 16.868401 |
| C | 2.684571  | -3.197847 | 16.868472 |
| C | 4.111693  | -0.725943 | 16.868480 |
| C | 4.111696  | 0.725232  | 16.868416 |
| C | 0.724077  | 4.107953  | 15.620892 |
| C | -0.722546 | 4.107958  | 15.620781 |
| C | -3.195558 | 2.680197  | 15.620647 |
| C | -3.918856 | 1.427372  | 15.620643 |
| C | -3.918853 | -1.428197 | 15.620765 |
| C | -3.195551 | -2.681019 | 15.620872 |
| C | -0.722546 | -4.108771 | 15.621128 |
| C | 0.724077  | -4.108767 | 15.621239 |
| C | 3.197064  | -2.681010 | 15.621372 |
| C | 3.920362  | -1.428185 | 15.621376 |
| C | 3.920366  | 1.427359  | 15.621254 |
| C | 3.197072  | 2.680187  | 15.621147 |
| C | -1.427115 | 3.917902  | 14.367982 |
| C | -2.678561 | 3.195404  | 14.367921 |
| C | -4.106527 | 0.722045  | 14.367914 |
| C | -4.106524 | -0.722982 | 14.367970 |
| C | -2.678556 | -3.196332 | 14.368174 |
| C | -1.427109 | -3.918828 | 14.368291 |
| C | 1.428838  | -3.918820 | 14.368500 |
| C | 2.680281  | -3.196316 | 14.368562 |
| C | 4.108231  | -0.722984 | 14.368568 |
| C | 4.108234  | 0.722045  | 14.368512 |
| C | 2.680287  | 3.195388  | 14.368310 |
| C | 1.428846  | 3.917894  | 14.368192 |
| C | -3.196530 | 2.683335  | 13.119349 |
| C | -3.922053 | 1.426658  | 13.119346 |
| C | -3.922048 | -1.427695 | 13.119451 |
| C | -3.196522 | -2.684369 | 13.119544 |
| C | -0.724575 | -4.111507 | 13.119764 |
| C | 0.726497  | -4.111502 | 13.119860 |
| C | 3.198425  | -2.684359 | 13.119976 |
| C | 3.923948  | -1.427681 | 13.119979 |
| C | 3.923952  | 1.426644  | 13.119874 |
| C | 3.198434  | 2.683324  | 13.119781 |
| C | 0.726498  | 4.110477  | 13.119560 |
| C | -0.724574 | 4.110483  | 13.119464 |
| C | -4.107215 | 0.722655  | 11.872039 |
| C | -4.107212 | -0.723788 | 11.872087 |
| C | -2.679422 | -3.196827 | 11.872258 |
| C | -1.426750 | -3.920030 | 11.872357 |
| C | 1.428840  | -3.920022 | 11.872535 |

|   |           |           |           |
|---|-----------|-----------|-----------|
| C | 2.681508  | -3.196811 | 11.872587 |
| C | 4.109279  | -0.723789 | 11.872594 |
| C | 4.109282  | 0.722655  | 11.872547 |
| C | 2.681514  | 3.195687  | 11.872373 |
| C | 1.428849  | 3.918901  | 11.872273 |
| C | -1.426757 | 3.918909  | 11.872096 |
| C | -2.679427 | 3.195704  | 11.872044 |
| C | -3.917442 | -1.428558 | 10.619448 |
| C | -3.194807 | -2.680222 | 10.619524 |
| C | -0.721516 | -4.108138 | 10.619706 |
| C | 0.723770  | -4.108132 | 10.619785 |
| C | 3.197042  | -2.680211 | 10.619881 |
| C | 3.919672  | -1.428544 | 10.619884 |
| C | 3.919676  | 1.427327  | 10.619797 |
| C | 3.197051  | 2.678996  | 10.619720 |
| C | 0.723770  | 4.106929  | 10.619537 |
| C | -0.721515 | 4.106935  | 10.619458 |
| C | -3.194816 | 2.679008  | 10.619363 |
| C | -3.917446 | 1.427342  | 10.619361 |
| C | -2.682603 | -3.198113 | 9.371153  |
| C | -1.425980 | -3.923597 | 9.371233  |
| C | 1.428371  | -3.923588 | 9.371376  |
| C | 2.684990  | -3.198095 | 9.371419  |
| C | 4.112136  | -0.726152 | 9.371423  |
| C | 4.112140  | 0.724855  | 9.371385  |
| C | 2.684996  | 3.196810  | 9.371246  |
| C | 1.428380  | 3.922305  | 9.371166  |
| C | -1.425988 | 3.922314  | 9.371022  |
| C | -2.682609 | 3.196828  | 9.370980  |
| C | -4.109774 | 0.724855  | 9.370976  |
| C | -4.109771 | -0.726151 | 9.371014  |
| C | -0.721873 | -4.108812 | 8.123703  |
| C | 0.724394  | -4.108806 | 8.123765  |
| C | 3.197451  | -2.681009 | 8.123838  |
| C | 3.920571  | -1.428493 | 8.123840  |
| C | 3.920576  | 1.427131  | 8.123772  |
| C | 3.197461  | 2.679650  | 8.123713  |
| C | 0.724394  | 4.107459  | 8.123571  |
| C | -0.721872 | 4.107465  | 8.123510  |
| C | -3.194960 | 2.679662  | 8.123434  |
| C | -3.918080 | 1.427147  | 8.123432  |
| C | -3.918075 | -1.428508 | 8.123500  |
| C | -3.194950 | -2.681020 | 8.123560  |
| C | 1.429222  | -3.919433 | 6.871121  |
| C | 2.681083  | -3.196687 | 6.871152  |
| C | 4.108968  | -0.723468 | 6.871155  |
| C | 4.108972  | 0.722044  | 6.871126  |
| C | 2.681089  | 3.195275  | 6.871024  |
| C | 1.429231  | 3.918024  | 6.870964  |
| C | -1.426605 | 3.918033  | 6.870858  |
| C | -2.678468 | 3.195295  | 6.870826  |
| C | -4.106373 | 0.722044  | 6.870822  |
| C | -4.106369 | -0.723467 | 6.870851  |
| C | -2.678462 | -3.196706 | 6.870955  |
| C | -1.426597 | -3.919442 | 6.871014  |
| C | 3.198797  | -2.684498 | 5.622866  |
| C | 3.924267  | -1.427912 | 5.622867  |
| C | 3.924272  | 1.426442  | 5.622820  |
| C | 3.198808  | 2.683031  | 5.622778  |
| C | 0.726844  | 4.110201  | 5.622678  |
| C | -0.724122 | 4.110208  | 5.622635  |
| C | -3.196108 | 2.683044  | 5.622583  |
| C | -3.921577 | 1.426459  | 5.622581  |
| C | -3.921572 | -1.427928 | 5.622629  |
| C | -3.196098 | -2.684510 | 5.622671  |
| C | -0.724123 | -4.111662 | 5.622770  |
| C | 0.726844  | -4.111656 | 5.622814  |
| C | 4.109404  | -0.723801 | 4.375075  |
| C | 4.109408  | 0.722288  | 4.375057  |
| C | 2.681599  | 3.195394  | 4.374989  |

|   |           |           |           |
|---|-----------|-----------|-----------|
| C | 1.429240  | 3.918431  | 4.374951  |
| C | -1.426451 | 3.918441  | 4.374882  |
| C | -2.678814 | 3.195414  | 4.374862  |
| C | -4.106646 | 0.722288  | 4.374861  |
| C | -4.106643 | -0.723800 | 4.374879  |
| C | -2.678808 | -3.196913 | 4.374945  |
| C | -1.426442 | -3.919938 | 4.374983  |
| C | 1.429231  | -3.919929 | 4.375052  |
| C | 2.681592  | -3.196894 | 4.375072  |
| C | 3.920307  | 1.427109  | 3.122399  |
| C | 3.197467  | 2.679152  | 3.122376  |
| C | 0.724283  | 4.107030  | 3.122319  |
| C | -0.721432 | 4.107036  | 3.122295  |
| C | -3.194639 | 2.679165  | 3.122267  |
| C | -3.917484 | 1.427127  | 3.122266  |
| C | -3.917479 | -1.428665 | 3.122293  |
| C | -3.194629 | -2.680701 | 3.122316  |
| C | -0.721433 | -4.108560 | 3.122371  |
| C | 0.724283  | -4.108554 | 3.122395  |
| C | 3.197456  | -2.680689 | 3.122425  |
| C | 3.920302  | -1.428649 | 3.122426  |
| C | 2.685199  | 3.196663  | 1.874252  |
| C | 1.428634  | 3.922130  | 1.874235  |
| C | -1.425752 | 3.922140  | 1.874206  |
| C | -2.682323 | 3.196683  | 1.874197  |
| C | -4.109497 | 0.724693  | 1.874196  |
| C | -4.109494 | -0.726254 | 1.874204  |
| C | -2.682316 | -3.198232 | 1.874233  |
| C | -1.425744 | -3.923686 | 1.874249  |
| C | 1.428624  | -3.923677 | 1.874279  |
| C | 2.685192  | -3.198213 | 1.874287  |
| C | 4.112347  | -0.726255 | 1.874288  |
| C | 4.112350  | 0.724693  | 1.874280  |
| C | 0.724406  | 4.107132  | 0.626302  |
| C | -0.721500 | 4.107139  | 0.626297  |
| C | -3.194666 | 2.679292  | 0.626291  |
| C | -3.917606 | 1.427088  | 0.626290  |
| C | -3.917601 | -1.428656 | 0.626296  |
| C | -3.194655 | -2.680857 | 0.626301  |
| C | -0.721501 | -4.108692 | 0.626313  |
| C | 0.724406  | -4.108686 | 0.626318  |
| C | 3.197538  | -2.680845 | 0.626323  |
| C | 3.920478  | -1.428640 | 0.626322  |
| C | 3.920484  | 1.427070  | 0.626317  |
| C | 3.197549  | 2.679279  | 0.626312  |
| C | -1.426418 | 3.918269  | -0.626294 |
| C | -2.678624 | 3.195332  | -0.626291 |
| C | -4.106478 | 0.722167  | -0.626292 |
| C | -4.106475 | -0.723739 | -0.626294 |
| C | -2.678618 | -3.196891 | -0.626303 |
| C | -1.426410 | -3.919825 | -0.626309 |
| C | 1.429308  | -3.919816 | -0.626319 |
| C | 2.681512  | -3.196872 | -0.626322 |
| C | 4.109346  | -0.723740 | -0.626323 |
| C | 4.109350  | 0.722167  | -0.626321 |
| C | 2.681519  | 3.195312  | -0.626310 |
| C | 1.429318  | 3.918259  | -0.626304 |
| C | -3.196021 | 2.682986  | -1.874194 |
| C | -3.921482 | 1.426418  | -1.874194 |
| C | -3.921476 | -1.427976 | -1.874210 |
| C | -3.196011 | -2.684542 | -1.874224 |
| C | -0.724031 | -4.111697 | -1.874258 |
| C | 0.726917  | -4.111691 | -1.874272 |
| C | 3.198874  | -2.684530 | -1.874290 |
| C | 3.924335  | -1.427960 | -1.874291 |
| C | 3.924340  | 1.426400  | -1.874275 |
| C | 3.198885  | 2.682973  | -1.874260 |
| C | 0.726917  | 4.110147  | -1.874227 |
| C | -0.724030 | 4.110154  | -1.874212 |
| C | -4.106389 | 0.722087  | -3.122268 |

|   |           |           |           |
|---|-----------|-----------|-----------|
| C | -4.106385 | -0.723628 | -3.122281 |
| C | -2.678504 | -3.196822 | -3.122330 |
| C | -1.426461 | -3.919661 | -3.122357 |
| C | 1.429304  | -3.919652 | -3.122407 |
| C | 2.681342  | -3.196803 | -3.122421 |
| C | 4.109201  | -0.723630 | -3.122422 |
| C | 4.109205  | 0.722087  | -3.122409 |
| C | 2.681350  | 3.195273  | -3.122362 |
| C | 1.429314  | 3.918125  | -3.122334 |
| C | -1.426470 | 3.918134  | -3.122285 |
| C | -2.678511 | 3.195293  | -3.122271 |
| C | -3.917799 | -1.428603 | -4.374892 |
| C | -3.194763 | -2.680962 | -4.374925 |
| C | -0.721648 | -4.108776 | -4.375004 |
| C | 0.724441  | -4.108769 | -4.375038 |
| C | 3.197534  | -2.680951 | -4.375078 |
| C | 3.920565  | -1.428588 | -4.375079 |
| C | 3.920571  | 1.427078  | -4.375042 |
| C | 3.197545  | 2.679444  | -4.375009 |
| C | 0.724442  | 4.107275  | -4.374932 |
| C | -0.721647 | 4.107281  | -4.374898 |
| C | -3.194773 | 2.679457  | -4.374856 |
| C | -3.917804 | 1.427095  | -4.374855 |
| C | -2.682413 | -3.198192 | -5.622696 |
| C | -1.425824 | -3.923656 | -5.622745 |
| C | 1.428538  | -3.923646 | -5.622833 |
| C | 2.685122  | -3.198173 | -5.622859 |
| C | 4.112274  | -0.726220 | -5.622861 |
| C | 4.112278  | 0.724747  | -5.622838 |
| C | 2.685129  | 3.196712  | -5.622753 |
| C | 1.428548  | 3.922189  | -5.622704 |
| C | -1.425832 | 3.922198  | -5.622616 |
| C | -2.682419 | 3.196732  | -5.622590 |
| C | -4.109590 | 0.724747  | -5.622587 |
| C | -4.109587 | -0.726219 | -5.622610 |
| C | -0.721442 | -4.108376 | -6.871045 |
| C | 0.724070  | -4.108370 | -6.871097 |
| C | 3.197289  | -2.680479 | -6.871161 |
| C | 3.920032  | -1.428616 | -6.871163 |
| C | 3.920037  | 1.427195  | -6.871105 |
| C | 3.197300  | 2.679061  | -6.871055 |
| C | 0.724070  | 4.106964  | -6.870932 |
| C | -0.721440 | 4.106971  | -6.870880 |
| C | -3.194692 | 2.679073  | -6.870817 |
| C | -3.917434 | 1.427212  | -6.870815 |
| C | -3.917429 | -1.428631 | -6.870873 |
| C | -3.194682 | -2.680490 | -6.870924 |
| C | 1.429072  | -3.919996 | -8.123791 |
| C | 2.681587  | -3.196873 | -8.123828 |
| C | 4.109378  | -0.723816 | -8.123833 |
| C | 4.109381  | 0.722451  | -8.123799 |
| C | 2.681594  | 3.195520  | -8.123677 |
| C | 1.429081  | 3.918646  | -8.123607 |
| C | -1.426566 | 3.918655  | -8.123481 |
| C | -2.679083 | 3.195538  | -8.123445 |
| C | -4.106893 | 0.722451  | -8.123441 |
| C | -4.106889 | -0.723815 | -8.123475 |
| C | -2.679078 | -3.196891 | -8.123595 |
| C | -1.426558 | -3.920005 | -8.123666 |
| C | 3.198643  | -2.684439 | -9.371431 |
| C | 3.924133  | -1.427819 | -9.371433 |
| C | 3.924138  | 1.426525  | -9.371356 |
| C | 3.198653  | 2.683148  | -9.371287 |
| C | 0.726700  | 4.110312  | -9.371124 |
| C | -0.724305 | 4.110318  | -9.371053 |
| C | -3.196279 | 2.683160  | -9.370968 |
| C | -3.921769 | 1.426541  | -9.370966 |
| C | -3.921764 | -1.427834 | -9.371043 |
| C | -3.196270 | -2.684450 | -9.371112 |
| C | -0.724306 | -4.111598 | -9.371275 |

|   |           |           |            |
|---|-----------|-----------|------------|
| C | 0.726700  | -4.111592 | -9.371345  |
| C | 4.108643  | -0.723253 | -10.619872 |
| C | 4.108646  | 0.722033  | -10.619829 |
| C | 2.680734  | 3.195316  | -10.619674 |
| C | 1.429071  | 3.917952  | -10.619585 |
| C | -1.426823 | 3.917960  | -10.619424 |
| C | -2.678491 | 3.195334  | -10.619377 |
| C | -4.106424 | 0.722033  | -10.619370 |
| C | -4.106421 | -0.723252 | -10.619413 |
| C | -2.678485 | -3.196542 | -10.619570 |
| C | -1.426816 | -3.919166 | -10.619660 |
| C | 1.429062  | -3.919158 | -10.619821 |
| C | 2.680727  | -3.196525 | -10.619868 |
| C | 3.920503  | 1.427226  | -11.872509 |
| C | 3.197299  | 2.679898  | -11.872424 |
| C | 0.724268  | 4.107685  | -11.872223 |
| C | -0.722174 | 4.107691  | -11.872136 |
| C | -3.195225 | 2.679909  | -11.872028 |
| C | -3.918433 | 1.427241  | -11.872025 |
| C | -3.918429 | -1.428371 | -11.872122 |
| C | -3.195216 | -2.681037 | -11.872207 |
| C | -0.722175 | -4.108809 | -11.872410 |
| C | 0.724268  | -4.108803 | -11.872498 |
| C | 3.197289  | -2.681027 | -11.872603 |
| C | 3.920498  | -1.428357 | -11.872605 |
| C | 2.684805  | 3.196954  | -13.119726 |
| C | 1.428131  | 3.922483  | -13.119617 |
| C | -1.426216 | 3.922491  | -13.119423 |
| C | -2.682894 | 3.196971  | -13.119366 |
| C | -4.110048 | 0.725016  | -13.119359 |
| C | -4.110045 | -0.726055 | -13.119411 |
| C | -2.682889 | -3.198000 | -13.119599 |
| C | -1.426209 | -3.923518 | -13.119708 |
| C | 1.428123  | -3.923510 | -13.119903 |
| C | 2.684799  | -3.197984 | -13.119959 |
| C | 4.111936  | -0.726056 | -13.119965 |
| C | 4.111940  | 0.725016  | -13.119913 |
| C | 0.723380  | 4.106915  | -14.368131 |
| C | -0.721648 | 4.106920  | -14.368028 |
| C | -3.195007 | 2.678960  | -14.367903 |
| C | -3.917509 | 1.427516  | -14.367900 |
| C | -3.917505 | -1.428451 | -14.368013 |
| C | -3.194999 | -2.679892 | -14.368113 |
| C | -0.721649 | -4.107843 | -14.368351 |
| C | 0.723380  | -4.107838 | -14.368455 |
| C | 3.196712  | -2.679883 | -14.368580 |
| C | 3.919214  | -1.428438 | -14.368583 |
| C | 3.919218  | 1.427502  | -14.368470 |
| C | 3.196721  | 2.678949  | -14.368370 |
| C | -1.427020 | 3.919205  | -15.620732 |
| C | -2.679846 | 3.195910  | -15.620666 |
| C | -4.107612 | 0.722898  | -15.620659 |
| C | -4.107610 | -0.723725 | -15.620719 |
| C | -2.679841 | -3.196728 | -15.620937 |
| C | -1.427013 | -3.920021 | -15.621063 |
| C | 1.428536  | -3.920014 | -15.621288 |
| C | 2.681360  | -3.196713 | -15.621353 |
| C | 4.109112  | -0.723726 | -15.621361 |
| C | 4.109115  | 0.722898  | -15.621301 |
| C | 2.681366  | 3.195894  | -15.621083 |
| C | 1.428544  | 3.919197  | -15.620957 |
| C | -3.196859 | 2.683572  | -16.867720 |
| C | -3.922433 | 1.426806  | -16.867716 |
| C | -3.922429 | -1.427514 | -16.867846 |
| C | -3.196851 | -2.684278 | -16.867960 |
| C | -0.724932 | -4.111400 | -16.868232 |
| C | 0.726243  | -4.111396 | -16.868350 |
| C | 3.198147  | -2.684269 | -16.868492 |
| C | 3.923721  | -1.427503 | -16.868495 |
| C | 3.923725  | 1.426794  | -16.868366 |

|   |           |           |            |
|---|-----------|-----------|------------|
| C | 3.198155  | 2.683562  | -16.868252 |
| C | 0.726244  | 4.110698  | -16.867981 |
| C | -0.724931 | 4.110703  | -16.867863 |
| C | -4.106670 | 0.722068  | -18.116449 |
| C | -4.106668 | -0.722655 | -18.116516 |
| C | -2.678658 | -3.196074 | -18.116762 |
| C | -1.427475 | -3.918417 | -18.116904 |
| C | 1.428555  | -3.918411 | -18.117156 |
| C | 2.679734  | -3.196061 | -18.117230 |
| C | 4.107728  | -0.722656 | -18.117236 |
| C | 4.107731  | 0.722068  | -18.117169 |
| C | 2.679739  | 3.195482  | -18.116926 |
| C | 1.428561  | 3.917834  | -18.116785 |
| C | -1.427481 | 3.917841  | -18.116533 |
| C | -2.678662 | 3.195495  | -18.116459 |
| C | -3.919350 | -1.427989 | -19.369438 |
| C | -3.195953 | -2.680975 | -19.369566 |
| C | -0.722985 | -4.108704 | -19.369869 |
| C | 0.723827  | -4.108700 | -19.370000 |
| C | 3.196780  | -2.680967 | -19.370155 |
| C | 3.920174  | -1.427979 | -19.370159 |
| C | 3.920178  | 1.427524  | -19.370015 |
| C | 3.196788  | 2.680514  | -19.369889 |
| C | 0.723828  | 4.108255  | -19.369590 |
| C | -0.722984 | 4.108259  | -19.369460 |
| C | -3.195959 | 2.680523  | -19.369300 |
| C | -3.919353 | 1.427535  | -19.369295 |
| C | -2.683740 | -3.197701 | -20.616434 |
| C | -1.426834 | -3.923349 | -20.616591 |
| C | 1.427422  | -3.923343 | -20.616867 |
| C | 2.684325  | -3.197689 | -20.616948 |
| C | 4.111427  | -0.725827 | -20.616955 |
| C | 4.111430  | 0.725506  | -20.616881 |
| C | 2.684329  | 3.197375  | -20.616615 |
| C | 1.427428  | 3.923031  | -20.616460 |
| C | -1.426839 | 3.923037  | -20.616183 |
| C | -2.683744 | 3.197388  | -20.616101 |
| C | -4.110858 | 0.725506  | -20.616091 |
| C | -4.110856 | -0.725827 | -20.616165 |
| C | -0.722005 | -4.107053 | -21.865576 |
| C | 0.722335  | -4.107049 | -21.865718 |
| C | 3.195837  | -2.679002 | -21.865888 |
| C | 3.917996  | -1.428155 | -21.865892 |
| C | 3.917999  | 1.427976  | -21.865736 |
| C | 3.195843  | 2.678826  | -21.865600 |
| C | 0.722336  | 4.106880  | -21.865274 |
| C | -0.722004 | 4.106884  | -21.865132 |
| C | -3.195525 | 2.678833  | -21.864960 |
| C | -3.917684 | 1.427986  | -21.864955 |
| C | -3.917681 | -1.428164 | -21.865111 |
| C | -3.195519 | -2.679009 | -21.865249 |
| C | 1.427760  | -3.919931 | -23.118861 |
| C | 2.680926  | -3.196437 | -23.118948 |
| C | 4.108640  | -0.723525 | -23.118957 |
| C | 4.108642  | 0.723492  | -23.118877 |
| C | 2.680930  | 3.196410  | -23.118589 |
| C | 1.427765  | 3.919906  | -23.118423 |
| C | -1.427708 | 3.919912  | -23.118126 |
| C | -2.680876 | 3.196421  | -23.118037 |
| C | -4.108600 | 0.723492  | -23.118028 |
| C | -4.108598 | -0.723524 | -23.118107 |
| C | -2.680873 | -3.196447 | -23.118396 |
| C | -1.427704 | -3.919936 | -23.118564 |
| C | 3.197484  | -2.684148 | -24.365402 |
| C | 3.923267  | -1.427027 | -24.365406 |
| C | 3.923270  | 1.427146  | -24.365240 |
| C | 3.197490  | 2.684268  | -24.365094 |
| C | 0.725684  | 4.111333  | -24.364748 |
| C | -0.725902 | 4.111337  | -24.364596 |
| C | -3.197719 | 2.684275  | -24.364412 |

|   |           |           |            |
|---|-----------|-----------|------------|
| C | -3.923503 | 1.427155  | -24.364406 |
| C | -3.923500 | -1.427035 | -24.364572 |
| C | -3.197714 | -2.684154 | -24.364720 |
| C | -0.725903 | -4.111210 | -24.365069 |
| C | 0.725684  | -4.111207 | -24.365221 |
| C | 4.106405  | -0.721772 | -25.614460 |
| C | 4.106407  | 0.722044  | -25.614376 |
| C | 2.678283  | 3.195666  | -25.614074 |
| C | 1.427888  | 3.917560  | -25.613898 |
| C | -1.428395 | 3.917565  | -25.613584 |
| C | -2.678793 | 3.195675  | -25.613490 |
| C | -4.106927 | 0.722045  | -25.613478 |
| C | -4.106926 | -0.721771 | -25.613562 |
| C | -2.678790 | -3.195397 | -25.613869 |
| C | -1.428392 | -3.917285 | -25.614047 |
| C | 1.427884  | -3.917281 | -25.614361 |
| C | 2.678280  | -3.195388 | -25.614453 |
| C | 3.919686  | 1.427907  | -26.867703 |
| C | 3.196078  | 2.681262  | -26.867550 |
| C | 0.723220  | 4.108931  | -26.867188 |
| C | -0.724018 | 4.108933  | -26.867028 |
| C | -3.196885 | 2.681268  | -26.866833 |
| C | -3.920496 | 1.427914  | -26.866827 |
| C | -3.920494 | -1.427481 | -26.867001 |
| C | -3.196881 | -2.680833 | -26.867157 |
| C | -0.724019 | -4.108494 | -26.867526 |
| C | 0.723219  | -4.108491 | -26.867686 |
| C | 3.196073  | -2.680828 | -26.867873 |
| C | 3.919684  | -1.427475 | -26.867877 |
| C | 2.683959  | 3.197948  | -28.113355 |
| C | 1.426454  | 3.923944  | -28.113171 |
| C | -1.427552 | 3.923948  | -28.112843 |
| C | -2.685060 | 3.197956  | -28.112745 |
| C | -4.112051 | 0.726310  | -28.112732 |
| C | -4.112050 | -0.725716 | -28.112820 |
| C | -2.685057 | -3.197358 | -28.113140 |
| C | -1.427549 | -3.923349 | -28.113327 |
| C | 1.426450  | -3.923345 | -28.113655 |
| C | 2.683956  | -3.197351 | -28.113751 |
| C | 4.110940  | -0.725717 | -28.113758 |
| C | 4.110942  | 0.726309  | -28.113670 |
| C | 0.720805  | 4.106545  | -29.362284 |
| C | -0.722204 | 4.106547  | -29.362119 |
| C | -3.196045 | 2.678325  | -29.361919 |
| C | -3.917544 | 1.428634  | -29.361913 |
| C | -3.917543 | -1.427875 | -29.362094 |
| C | -3.196042 | -2.677566 | -29.362254 |
| C | -0.722205 | -4.105784 | -29.362635 |
| C | 0.720804  | -4.105782 | -29.362800 |
| C | 3.194634  | -2.677562 | -29.362997 |
| C | 3.916134  | -1.427871 | -29.363002 |
| C | 3.916135  | 1.428628  | -29.362821 |
| C | 3.194638  | 2.678320  | -29.362662 |
| C | -1.428581 | 3.920928  | -30.616046 |
| C | -2.682251 | 3.197157  | -30.615945 |
| C | -4.109974 | 0.724258  | -30.615934 |
| C | -4.109973 | -0.723334 | -30.616026 |
| C | -2.682249 | -3.196229 | -30.616353 |
| C | -1.428579 | -3.919999 | -30.616545 |
| C | 1.426869  | -3.919997 | -30.616884 |
| C | 2.680537  | -3.196223 | -30.616983 |
| C | 4.108255  | -0.723334 | -30.616994 |
| C | 4.108256  | 0.724257  | -30.616903 |
| C | 2.680540  | 3.197151  | -30.616575 |
| C | 1.426872  | 3.920925  | -30.616384 |
| C | -3.199380 | 2.686076  | -31.860942 |
| C | -3.925937 | 1.427634  | -31.860937 |
| C | -3.925935 | -1.426541 | -31.861122 |
| C | -3.199377 | -2.684982 | -31.861288 |
| C | -0.727568 | -4.112019 | -31.861677 |

|   |           |           |            |
|---|-----------|-----------|------------|
| C | 0.725550  | -4.112017 | -31.861848 |
| C | 3.197354  | -2.684979 | -31.862051 |
| C | 3.923910  | -1.426537 | -31.862057 |
| C | 3.923912  | 1.427629  | -31.861871 |
| C | 3.197357  | 2.686072  | -31.861705 |
| C | 0.725551  | 4.113113  | -31.861317 |
| C | -0.727567 | 4.113115  | -31.861146 |
| C | -4.107235 | 0.721380  | -33.110106 |
| C | -4.107234 | -0.720119 | -33.110199 |
| C | -2.678393 | -3.194932 | -33.110534 |
| C | -1.429997 | -3.915654 | -33.110729 |
| C | 1.427666  | -3.915652 | -33.111075 |
| C | 2.676060  | -3.194928 | -33.111177 |
| C | 4.104896  | -0.720119 | -33.111187 |
| C | 4.104897  | 0.721379  | -33.111094 |
| C | 2.676062  | 3.196191  | -33.110760 |
| C | 1.427668  | 3.916916  | -33.110565 |
| C | -1.429998 | 3.916919  | -33.110219 |
| C | -2.678394 | 3.196196  | -33.110117 |
| C | -3.921164 | -1.426617 | -34.365675 |
| C | -3.197364 | -2.680270 | -34.365841 |
| C | -0.725119 | -4.107557 | -34.366238 |
| C | 0.722473  | -4.107556 | -34.366412 |
| C | 3.194714  | -2.680267 | -34.366617 |
| C | 3.918512  | -1.426614 | -34.366625 |
| C | 3.918514  | 1.428046  | -34.366437 |
| C | 3.194717  | 2.681700  | -34.366265 |
| C | 0.722474  | 4.108991  | -34.365872 |
| C | -0.725118 | 4.108993  | -34.365698 |
| C | -3.197366 | 2.681703  | -34.365489 |
| C | -3.921165 | 1.428050  | -34.365487 |
| C | -2.684989 | -3.193410 | -35.609227 |
| C | -1.426015 | -3.920241 | -35.609425 |
| C | 1.423055  | -3.920240 | -35.609774 |
| C | 2.682028  | -3.193407 | -35.609880 |
| C | 4.106569  | -0.726058 | -35.609895 |
| C | 4.106570  | 0.727659  | -35.609800 |
| C | 2.682030  | 3.195010  | -35.609458 |
| C | 1.423057  | 3.921844  | -35.609256 |
| C | -1.426016 | 3.921846  | -35.608907 |
| C | -2.684990 | 3.195014  | -35.608804 |
| C | -4.109534 | 0.727660  | -35.608798 |
| C | -4.109534 | -0.726058 | -35.608893 |
| C | -0.718521 | -4.089324 | -36.858541 |
| C | 0.715247  | -4.089323 | -36.858716 |
| C | 3.182213  | -2.665075 | -36.858928 |
| C | 3.899112  | -1.423391 | -36.858945 |
| C | 3.899113  | 1.425163  | -36.858755 |
| C | 3.182215  | 2.666847  | -36.858575 |
| C | 0.715248  | 4.091098  | -36.858173 |
| C | -0.718521 | 4.091099  | -36.857998 |
| C | -3.185492 | 2.666850  | -36.857794 |
| C | -3.902391 | 1.425166  | -36.857800 |
| C | -3.902390 | -1.423393 | -36.857990 |
| C | -3.185491 | -2.665076 | -36.858147 |
| C | 1.419174  | -3.910450 | -38.122098 |
| C | 2.675150  | -3.185356 | -38.122200 |
| C | 4.096135  | -0.724153 | -38.122242 |
| C | 4.096135  | 0.726097  | -38.122146 |
| C | 2.675151  | 3.187301  | -38.121776 |
| C | 1.419176  | 3.912396  | -38.121577 |
| C | -1.422768 | 3.912398  | -38.121227 |
| C | -2.678745 | 3.187304  | -38.121119 |
| C | -4.099732 | 0.726098  | -38.121139 |
| C | -4.099731 | -0.724153 | -38.121235 |
| C | -2.678744 | -3.185358 | -38.121543 |
| C | -1.422767 | -3.910451 | -38.121747 |
| C | 3.225449  | -2.714343 | -39.362438 |
| C | 3.963301  | -1.436252 | -39.362469 |
| C | 3.963302  | 1.438365  | -39.362278 |



|   |           |           |            |
|---|-----------|-----------|------------|
| C | 3.225451  | 2.716458  | -39.362078 |
| C | 0.735939  | 4.153694  | -39.361677 |
| C | -0.739843 | 4.153697  | -39.361497 |
| C | -3.229358 | 2.716462  | -39.361286 |
| C | -3.967212 | 1.438368  | -39.361306 |
| C | -3.967212 | -1.436254 | -39.361497 |
| C | -3.229356 | -2.714346 | -39.361646 |
| C | -0.739842 | -4.151579 | -39.362048 |
| C | 0.735938  | -4.151577 | -39.362229 |
| C | 4.213408  | -0.692832 | -40.573852 |
| C | 4.213409  | 0.695109  | -40.573760 |
| C | 2.706761  | 3.305091  | -40.573347 |
| C | 1.504751  | 3.999036  | -40.573156 |
| C | -1.508962 | 3.999046  | -40.572788 |
| C | -2.710974 | 3.305103  | -40.572684 |
| C | -4.217640 | 0.695111  | -40.572729 |
| C | -4.217639 | -0.692833 | -40.572821 |
| C | -2.710969 | -3.302816 | -40.573121 |
| C | -1.508957 | -3.996758 | -40.573318 |
| C | 1.504745  | -3.996749 | -40.573686 |
| C | 2.706755  | -3.302805 | -40.573784 |
| H | -4.314615 | -1.072724 | 41.531097  |
| H | -3.088494 | -3.196483 | 41.531389  |
| H | -1.228368 | -4.270042 | 41.531744  |
| H | 1.223919  | -4.270039 | 41.532049  |
| H | 3.084015  | -3.196466 | 41.532137  |
| H | 4.310134  | -1.072706 | 41.532149  |
| H | 4.310142  | 1.075117  | 41.532011  |
| H | 3.084026  | 3.198879  | 41.531713  |
| H | 1.223919  | 4.272468  | 41.531487  |
| H | -1.228368 | 4.272471  | 41.531182  |
| H | -3.088504 | 3.198896  | 41.530965  |
| H | -4.314624 | 1.075136  | 41.530959  |
| H | 4.269011  | -1.224940 | -41.532217 |
| H | 4.269013  | 1.227347  | -41.532052 |
| H | 3.195457  | 3.087461  | -41.531740 |
| H | 1.071699  | 4.313583  | -41.531397 |
| H | -1.076152 | 4.313599  | -41.531141 |
| H | -3.199914 | 3.087481  | -41.530958 |
| H | -4.273498 | 1.227347  | -41.531014 |
| H | -4.273497 | -1.224940 | -41.531179 |
| H | -3.199905 | -3.085058 | -41.531362 |
| H | -1.076143 | -4.311175 | -41.531710 |
| H | 1.071688  | -4.311159 | -41.531966 |
| H | 3.195448  | -3.085039 | -41.532144 |

Nanotube (6,6) u33v6s  
B3LYP/STO-3G Energy: -30282.962536

|   |            |           |           |
|---|------------|-----------|-----------|
| 6 | -41.229931 | 4.211889  | 0.691852  |
| 6 | -41.229931 | 4.211889  | -0.691852 |
| 6 | -41.229870 | 2.705221  | -3.301890 |
| 6 | -41.229871 | 1.506882  | -3.993714 |
| 6 | -41.229871 | -1.506882 | -3.993714 |
| 6 | -41.229870 | -2.705221 | -3.301890 |
| 6 | -41.229931 | -4.211889 | -0.691852 |
| 6 | -41.229931 | -4.211889 | 0.691852  |
| 6 | -41.229870 | -2.705221 | 3.301890  |
| 6 | -41.229871 | -1.506882 | 3.993714  |
| 6 | -41.229871 | 1.506882  | 3.993714  |
| 6 | -41.229870 | 2.705221  | 3.301890  |
| 6 | -40.014144 | 3.958654  | -1.437259 |
| 6 | -40.014117 | 3.224063  | -2.709719 |
| 6 | -40.014113 | 0.734636  | -4.146903 |
| 6 | -40.014113 | -0.734636 | -4.146903 |
| 6 | -40.014117 | -3.224063 | -2.709719 |
| 6 | -40.014144 | -3.958654 | -1.437259 |
| 6 | -40.014144 | -3.958654 | 1.437259  |

|   |            |           |           |
|---|------------|-----------|-----------|
| 6 | -40.014117 | -3.224063 | 2.709719  |
| 6 | -40.014113 | -0.734636 | 4.146903  |
| 6 | -40.014113 | 0.734636  | 4.146903  |
| 6 | -40.014117 | 3.224063  | 2.709719  |
| 6 | -40.014144 | 3.958654  | 1.437259  |
| 6 | -38.773802 | 2.677699  | -3.185833 |
| 6 | -38.773804 | 1.420166  | -3.911824 |
| 6 | -38.773804 | -1.420166 | -3.911824 |
| 6 | -38.773802 | -2.677699 | -3.185833 |
| 6 | -38.773835 | -4.097865 | -0.726023 |
| 6 | -38.773835 | -4.097865 | 0.726023  |
| 6 | -38.773802 | -2.677699 | 3.185833  |
| 6 | -38.773804 | -1.420166 | 3.911824  |
| 6 | -38.773804 | 1.420166  | 3.911824  |
| 6 | -38.773802 | 2.677699  | 3.185833  |
| 6 | -38.773835 | 4.097865  | 0.726023  |
| 6 | -38.773835 | 4.097865  | -0.726023 |
| 6 | -37.512696 | 0.715070  | -4.086778 |
| 6 | -37.512696 | -0.715070 | -4.086778 |
| 6 | -37.512702 | -3.181789 | -2.662678 |
| 6 | -37.512713 | -3.896870 | -1.424132 |
| 6 | -37.512713 | -3.896870 | 1.424132  |
| 6 | -37.512702 | -3.181789 | 2.662678  |
| 6 | -37.512696 | -0.715070 | 4.086778  |
| 6 | -37.512696 | 0.715070  | 4.086778  |
| 6 | -37.512702 | 3.181789  | 2.662678  |
| 6 | -37.512713 | 3.896870  | 1.424132  |
| 6 | -37.512713 | 3.896870  | -1.424132 |
| 6 | -37.512702 | 3.181789  | -2.662678 |
| 6 | -36.258679 | -1.424724 | -3.914681 |
| 6 | -36.258682 | -2.677906 | -3.191196 |
| 6 | -36.258687 | -4.102632 | -0.723513 |
| 6 | -36.258687 | -4.102632 | 0.723513  |
| 6 | -36.258682 | -2.677906 | 3.191196  |
| 6 | -36.258679 | -1.424724 | 3.914681  |
| 6 | -36.258679 | 1.424724  | 3.914681  |
| 6 | -36.258682 | 2.677906  | 3.191196  |
| 6 | -36.258687 | 4.102632  | 0.723513  |
| 6 | -36.258687 | 4.102632  | -0.723513 |
| 6 | -36.258682 | 2.677906  | -3.191196 |
| 6 | -36.258679 | 1.424724  | -3.914681 |
| 6 | -35.014992 | -3.195455 | -2.681946 |
| 6 | -35.014995 | -3.920372 | -1.426346 |
| 6 | -35.014995 | -3.920372 | 1.426346  |
| 6 | -35.014992 | -3.195455 | 2.681946  |
| 6 | -35.014992 | -0.724919 | 4.108239  |
| 6 | -35.014992 | 0.724919  | 4.108239  |
| 6 | -35.014992 | 3.195455  | 2.681946  |
| 6 | -35.014995 | 3.920372  | 1.426346  |
| 6 | -35.014995 | 3.920372  | -1.426346 |
| 6 | -35.014992 | 3.195455  | -2.681946 |
| 6 | -35.014992 | 0.724919  | -4.108239 |
| 6 | -35.014992 | -0.724919 | -4.108239 |
| 6 | -33.762607 | -4.102815 | -0.719151 |
| 6 | -33.762607 | -4.102815 | 0.719151  |
| 6 | -33.762605 | -2.674223 | 3.193551  |
| 6 | -33.762605 | -1.428593 | 3.912673  |
| 6 | -33.762605 | 1.428593  | 3.912673  |
| 6 | -33.762605 | 2.674223  | 3.193551  |
| 6 | -33.762607 | 4.102815  | 0.719151  |
| 6 | -33.762607 | 4.102815  | -0.719151 |
| 6 | -33.762605 | 2.674223  | -3.193551 |
| 6 | -33.762605 | 1.428593  | -3.912673 |
| 6 | -33.762605 | -1.428593 | -3.912673 |
| 6 | -33.762605 | -2.674223 | -3.193551 |
| 6 | -32.508195 | -3.917836 | 1.427414  |
| 6 | -32.508195 | -3.195114 | 2.679222  |
| 6 | -32.508194 | -0.722727 | 4.106588  |
| 6 | -32.508194 | 0.722727  | 4.106588  |
| 6 | -32.508195 | 3.195114  | 2.679222  |

|   |            |           |           |
|---|------------|-----------|-----------|
| 6 | -32.508195 | 3.917836  | 1.427414  |
| 6 | -32.508195 | 3.917836  | -1.427414 |
| 6 | -32.508195 | 3.195114  | -2.679222 |
| 6 | -32.508194 | 0.722727  | -4.106588 |
| 6 | -32.508194 | -0.722727 | -4.106588 |
| 6 | -32.508195 | -3.195114 | -2.679222 |
| 6 | -32.508195 | -3.917836 | -1.427414 |
| 6 | -31.262159 | -2.682580 | 3.196216  |
| 6 | -31.262160 | -1.426725 | 3.921245  |
| 6 | -31.262160 | 1.426725  | 3.921245  |
| 6 | -31.262159 | 2.682580  | 3.196216  |
| 6 | -31.262159 | 4.109290  | 0.725057  |
| 6 | -31.262159 | 4.109290  | -0.725057 |
| 6 | -31.262159 | 2.682580  | -3.196216 |
| 6 | -31.262160 | 1.426725  | -3.921245 |
| 6 | -31.262160 | -1.426725 | -3.921245 |
| 6 | -31.262159 | -2.682580 | -3.196216 |
| 6 | -31.262159 | -4.109290 | -0.725057 |
| 6 | -31.262159 | -4.109290 | 0.725057  |
| 6 | -30.011997 | -0.720295 | 4.103451  |
| 6 | -30.011997 | 0.720295  | 4.103451  |
| 6 | -30.011993 | 3.193602  | 2.675544  |
| 6 | -30.011993 | 3.913889  | 1.427945  |
| 6 | -30.011993 | 3.913889  | -1.427945 |
| 6 | -30.011993 | 3.193602  | -2.675544 |
| 6 | -30.011997 | 0.720295  | -4.103451 |
| 6 | -30.011997 | -0.720295 | -4.103451 |
| 6 | -30.011993 | -3.193602 | -2.675544 |
| 6 | -30.011993 | -3.913889 | -1.427945 |
| 6 | -30.011993 | -3.913889 | 1.427945  |
| 6 | -30.011993 | -3.193602 | 2.675544  |
| 6 | -28.757409 | 1.427443  | 3.915956  |
| 6 | -28.757408 | 2.677628  | 3.194196  |
| 6 | -28.757405 | 4.105056  | 0.721783  |
| 6 | -28.757405 | 4.105056  | -0.721783 |
| 6 | -28.757408 | 2.677628  | -3.194196 |
| 6 | -28.757409 | 1.427443  | -3.915956 |
| 6 | -28.757409 | -1.427443 | -3.915956 |
| 6 | -28.757408 | -2.677628 | -3.194196 |
| 6 | -28.757405 | -4.105056 | -0.721783 |
| 6 | -28.757405 | -4.105056 | 0.721783  |
| 6 | -28.757408 | -2.677628 | 3.194196  |
| 6 | -28.757409 | -1.427443 | 3.915956  |
| 6 | -27.509841 | 3.195994  | 2.682230  |
| 6 | -27.509839 | 3.920865  | 1.426685  |
| 6 | -27.509839 | 3.920865  | -1.426685 |
| 6 | -27.509841 | 3.195994  | -2.682230 |
| 6 | -27.509843 | 0.724882  | -4.108874 |
| 6 | -27.509843 | -0.724882 | -4.108874 |
| 6 | -27.509841 | -3.195994 | -2.682230 |
| 6 | -27.509839 | -3.920865 | -1.426685 |
| 6 | -27.509839 | -3.920865 | 1.426685  |
| 6 | -27.509841 | -3.195994 | 2.682230  |
| 6 | -27.509843 | -0.724882 | 4.108874  |
| 6 | -27.509843 | 0.724882  | 4.108874  |
| 6 | -26.260965 | 4.104432  | 0.721106  |
| 6 | -26.260965 | 4.104432  | -0.721106 |
| 6 | -26.260966 | 2.676730  | -3.194003 |
| 6 | -26.260967 | 1.427720  | -3.915087 |
| 6 | -26.260967 | -1.427720 | -3.915087 |
| 6 | -26.260966 | -2.676730 | -3.194003 |
| 6 | -26.260965 | -4.104432 | -0.721106 |
| 6 | -26.260965 | -4.104432 | 0.721106  |
| 6 | -26.260966 | -2.676730 | 3.194003  |
| 6 | -26.260967 | -1.427720 | 3.915087  |
| 6 | -26.260967 | 1.427720  | 3.915087  |
| 6 | -26.260966 | 2.676730  | 3.194003  |
| 6 | -25.006634 | 3.915147  | -1.427638 |
| 6 | -25.006635 | 3.193963  | -2.676801 |
| 6 | -25.006636 | 0.721197  | -4.104408 |

|   |            |           |           |
|---|------------|-----------|-----------|
| 6 | -25.006636 | -0.721197 | -4.104408 |
| 6 | -25.006635 | -3.193963 | -2.676801 |
| 6 | -25.006634 | -3.915147 | -1.427638 |
| 6 | -25.006634 | -3.915147 | 1.427638  |
| 6 | -25.006635 | -3.193963 | 2.676801  |
| 6 | -25.006636 | -0.721197 | 4.104408  |
| 6 | -25.006636 | 0.721197  | 4.104408  |
| 6 | -25.006635 | 3.193963  | 2.676801  |
| 6 | -25.006634 | 3.915147  | 1.427638  |
| 6 | -23.757803 | 2.681918  | -3.195884 |
| 6 | -23.757804 | 1.426758  | -3.920522 |
| 6 | -23.757804 | -1.426758 | -3.920522 |
| 6 | -23.757803 | -2.681918 | -3.195884 |
| 6 | -23.757801 | -4.108649 | -0.724658 |
| 6 | -23.757801 | -4.108649 | 0.724658  |
| 6 | -23.757803 | -2.681918 | 3.195884  |
| 6 | -23.757804 | -1.426758 | 3.920522  |
| 6 | -23.757804 | 1.426758  | 3.920522  |
| 6 | -23.757803 | 2.681918  | 3.195884  |
| 6 | -23.757801 | 4.108649  | 0.724658  |
| 6 | -23.757801 | 4.108649  | -0.724658 |
| 6 | -22.509792 | 0.721831  | -4.105284 |
| 6 | -22.509792 | -0.721831 | -4.105284 |
| 6 | -22.509790 | -3.194400 | -2.677789 |
| 6 | -22.509789 | -3.916217 | -1.427526 |
| 6 | -22.509789 | -3.916217 | 1.427526  |
| 6 | -22.509790 | -3.194400 | 2.677789  |
| 6 | -22.509792 | -0.721831 | 4.105284  |
| 6 | -22.509792 | 0.721831  | 4.105284  |
| 6 | -22.509790 | 3.194400  | 2.677789  |
| 6 | -22.509789 | 3.916217  | 1.427526  |
| 6 | -22.509789 | 3.916217  | -1.427526 |
| 6 | -22.509790 | 3.194400  | -2.677789 |
| 6 | -21.255918 | -1.427760 | -3.914540 |
| 6 | -21.255917 | -2.676227 | -3.193765 |
| 6 | -21.255915 | -4.103964 | -0.720793 |
| 6 | -21.255915 | -4.103964 | 0.720793  |
| 6 | -21.255917 | -2.676227 | 3.193765  |
| 6 | -21.255918 | -1.427760 | 3.914540  |
| 6 | -21.255918 | 1.427760  | 3.914540  |
| 6 | -21.255917 | 2.676227  | 3.193765  |
| 6 | -21.255915 | 4.103964  | 0.720793  |
| 6 | -21.255915 | 4.103964  | -0.720793 |
| 6 | -21.255917 | 2.676227  | -3.193765 |
| 6 | -21.255918 | 1.427760  | -3.914540 |
| 6 | -20.005920 | -3.195707 | -2.681412 |
| 6 | -20.005920 | -3.920004 | -1.426851 |
| 6 | -20.005920 | -3.920004 | 1.426851  |
| 6 | -20.005920 | -3.195707 | 2.681412  |
| 6 | -20.005921 | -0.724313 | 4.108230  |
| 6 | -20.005921 | 0.724313  | 4.108230  |
| 6 | -20.005920 | 3.195707  | 2.681412  |
| 6 | -20.005920 | 3.920004  | 1.426851  |
| 6 | -20.005920 | 3.920004  | -1.426851 |
| 6 | -20.005920 | 3.195707  | -2.681412 |
| 6 | -20.005921 | 0.724313  | -4.108230 |
| 6 | -20.005921 | -0.724313 | -4.108230 |
| 6 | -18.758434 | -4.106090 | -0.722496 |
| 6 | -18.758434 | -4.106090 | 0.722496  |
| 6 | -18.758434 | -2.678766 | 3.194756  |
| 6 | -18.758435 | -1.427351 | 3.917234  |
| 6 | -18.758435 | 1.427351  | 3.917234  |
| 6 | -18.758434 | 2.678766  | 3.194756  |
| 6 | -18.758434 | 4.106090  | 0.722496  |
| 6 | -18.758434 | 4.106090  | -0.722496 |
| 6 | -18.758434 | 2.678766  | -3.194756 |
| 6 | -18.758435 | 1.427351  | -3.917234 |
| 6 | -18.758435 | -1.427351 | -3.917234 |
| 6 | -18.758434 | -2.678766 | -3.194756 |
| 6 | -17.505226 | -3.914203 | 1.427830  |

|   |            |           |           |
|---|------------|-----------|-----------|
| 6 | -17.505226 | -3.193658 | 2.675895  |
| 6 | -17.505227 | -0.720561 | 4.103700  |
| 6 | -17.505227 | 0.720561  | 4.103700  |
| 6 | -17.505226 | 3.193658  | 2.675895  |
| 6 | -17.505226 | 3.914203  | 1.427830  |
| 6 | -17.505226 | 3.914203  | -1.427830 |
| 6 | -17.505226 | 3.193658  | -2.675895 |
| 6 | -17.505227 | 0.720561  | -4.103700 |
| 6 | -17.505227 | -0.720561 | -4.103700 |
| 6 | -17.505226 | -3.193658 | -2.675895 |
| 6 | -17.505226 | -3.914203 | -1.427830 |
| 6 | -16.254175 | -2.680742 | 3.195448  |
| 6 | -16.254175 | -1.426963 | 3.919291  |
| 6 | -16.254175 | 1.426963  | 3.919291  |
| 6 | -16.254175 | 2.680742  | 3.195448  |
| 6 | -16.254174 | 4.107675  | 0.723861  |
| 6 | -16.254174 | 4.107675  | -0.723861 |
| 6 | -16.254175 | 2.680742  | -3.195448 |
| 6 | -16.254175 | 1.426963  | -3.919291 |
| 6 | -16.254175 | -1.426963 | -3.919291 |
| 6 | -16.254175 | -2.680742 | -3.195448 |
| 6 | -16.254174 | -4.107675 | -0.723861 |
| 6 | -16.254174 | -4.107675 | 0.723861  |
| 6 | -15.006946 | -0.723094 | 4.106804  |
| 6 | -15.006946 | 0.723094  | 4.106804  |
| 6 | -15.006945 | 3.195078  | 2.679642  |
| 6 | -15.006944 | 3.918155  | 1.427191  |
| 6 | -15.006944 | 3.918155  | -1.427191 |
| 6 | -15.006945 | 3.195078  | -2.679642 |
| 6 | -15.006946 | 0.723094  | -4.106804 |
| 6 | -15.006946 | -0.723094 | -4.106804 |
| 6 | -15.006945 | -3.195078 | -2.679642 |
| 6 | -15.006944 | -3.918155 | -1.427191 |
| 6 | -15.006944 | -3.918155 | 1.427191  |
| 6 | -15.006945 | -3.195078 | 2.679642  |
| 6 | -13.754556 | 1.427854  | 3.914125  |
| 6 | -13.754556 | 2.675816  | 3.193640  |
| 6 | -13.754555 | 4.103646  | 0.720502  |
| 6 | -13.754555 | 4.103646  | -0.720502 |
| 6 | -13.754556 | 2.675816  | -3.193640 |
| 6 | -13.754556 | 1.427854  | -3.914125 |
| 6 | -13.754556 | -1.427854 | -3.914125 |
| 6 | -13.754556 | -2.675816 | -3.193640 |
| 6 | -13.754555 | -4.103646 | -0.720502 |
| 6 | -13.754555 | -4.103646 | 0.720502  |
| 6 | -13.754556 | -2.675816 | 3.193640  |
| 6 | -13.754556 | -1.427854 | 3.914125  |
| 6 | -12.502580 | 3.195162  | 2.679967  |
| 6 | -12.502580 | 3.918479  | 1.427102  |
| 6 | -12.502580 | 3.918479  | -1.427102 |
| 6 | -12.502580 | 3.195162  | -2.679967 |
| 6 | -12.502579 | 0.723334  | -4.107040 |
| 6 | -12.502579 | -0.723334 | -4.107040 |
| 6 | -12.502580 | -3.195162 | -2.679967 |
| 6 | -12.502580 | -3.918479 | -1.427102 |
| 6 | -12.502580 | -3.918479 | 1.427102  |
| 6 | -12.502580 | -3.195162 | 2.679967  |
| 6 | -12.502579 | -0.723334 | 4.107040  |
| 6 | -12.502579 | 0.723334  | 4.107040  |
| 6 | -11.255312 | 4.107398  | 0.723593  |
| 6 | -11.255312 | 4.107398  | -0.723593 |
| 6 | -11.255311 | 2.680371  | -3.195343 |
| 6 | -11.255312 | 1.427056  | -3.918919 |
| 6 | -11.255312 | -1.427056 | -3.918919 |
| 6 | -11.255311 | -2.680371 | -3.195343 |
| 6 | -11.255312 | -4.107398 | -0.723593 |
| 6 | -11.255312 | -4.107398 | 0.723593  |
| 6 | -11.255311 | -2.680371 | 3.195343  |
| 6 | -11.255312 | -1.427056 | 3.918919  |
| 6 | -11.255312 | 1.427056  | 3.918919  |

|   |            |           |           |
|---|------------|-----------|-----------|
| 6 | -11.255311 | 2.680371  | 3.195343  |
| 6 | -10.003841 | 3.914288  | -1.427823 |
| 6 | -10.003841 | 3.193694  | -2.675974 |
| 6 | -10.003842 | 0.720611  | -4.103773 |
| 6 | -10.003842 | -0.720611 | -4.103773 |
| 6 | -10.003841 | -3.193694 | -2.675974 |
| 6 | -10.003841 | -3.914288 | -1.427823 |
| 6 | -10.003841 | -3.914288 | 1.427823  |
| 6 | -10.003841 | -3.193694 | 2.675974  |
| 6 | -10.003842 | -0.720611 | 4.103773  |
| 6 | -10.003842 | 0.720611  | 4.103773  |
| 6 | -10.003841 | 3.193694  | 2.675974  |
| 6 | -10.003841 | 3.914288  | 1.427823  |
| 6 | -8.751157  | 2.679135  | -3.194850 |
| 6 | -8.751157  | 1.427246  | -3.917603 |
| 6 | -8.751157  | -1.427246 | -3.917603 |
| 6 | -8.751157  | -2.679135 | -3.194850 |
| 6 | -8.751155  | -4.106353 | -0.722770 |
| 6 | -8.751155  | -4.106353 | 0.722770  |
| 6 | -8.751157  | -2.679135 | 3.194850  |
| 6 | -8.751157  | -1.427246 | 3.917603  |
| 6 | -8.751157  | 1.427246  | 3.917603  |
| 6 | -8.751157  | 2.679135  | 3.194850  |
| 6 | -8.751155  | 4.106353  | 0.722770  |
| 6 | -8.751155  | 4.106353  | -0.722770 |
| 6 | -7.503600  | 0.723957  | -4.107831 |
| 6 | -7.503600  | -0.723957 | -4.107831 |
| 6 | -7.503599  | -3.195535 | -2.680903 |
| 6 | -7.503599  | -3.919474 | -1.426958 |
| 6 | -7.503599  | -3.919474 | 1.426958  |
| 6 | -7.503599  | -3.195535 | 2.680903  |
| 6 | -7.503600  | -0.723957 | 4.107831  |
| 6 | -7.503600  | 0.723957  | 4.107831  |
| 6 | -7.503599  | 3.195535  | 2.680903  |
| 6 | -7.503599  | 3.919474  | 1.426958  |
| 6 | -7.503599  | 3.919474  | -1.426958 |
| 6 | -7.503599  | 3.195535  | -2.680903 |
| 6 | -6.253076  | -1.427759 | -3.914680 |
| 6 | -6.253076  | -2.676345 | -3.193834 |
| 6 | -6.253077  | -4.104078 | -0.720862 |
| 6 | -6.253077  | -4.104078 | 0.720862  |
| 6 | -6.253076  | -2.676345 | 3.193834  |
| 6 | -6.253076  | -1.427759 | 3.914680  |
| 6 | -6.253076  | 1.427759  | 3.914680  |
| 6 | -6.253076  | 2.676345  | 3.193834  |
| 6 | -6.253077  | 4.104078  | 0.720862  |
| 6 | -6.253077  | 4.104078  | -0.720862 |
| 6 | -6.253076  | 2.676345  | -3.193834 |
| 6 | -6.253076  | 1.427759  | -3.914680 |
| 6 | -4.999897  | -3.194552 | -2.678320 |
| 6 | -4.999897  | -3.916748 | -1.427396 |
| 6 | -4.999897  | -3.916748 | 1.427396  |
| 6 | -4.999897  | -3.194552 | 2.678320  |
| 6 | -4.999896  | -0.722212 | 4.105689  |
| 6 | -4.999896  | 0.722212  | 4.105689  |
| 6 | -4.999897  | 3.194552  | 2.678320  |
| 6 | -4.999897  | 3.916748  | 1.427396  |
| 6 | -4.999897  | 3.916748  | -1.427396 |
| 6 | -4.999897  | 3.194552  | -2.678320 |
| 6 | -4.999896  | 0.722212  | -4.105689 |
| 6 | -4.999896  | -0.722212 | -4.105689 |
| 6 | -3.751818  | -4.108098 | -0.724182 |
| 6 | -3.751818  | -4.108098 | 0.724182  |
| 6 | -3.751817  | -2.681231 | 3.195655  |
| 6 | -3.751817  | -1.426897 | 3.919819  |
| 6 | -3.751817  | 1.426897  | 3.919819  |
| 6 | -3.751817  | 2.681231  | 3.195655  |
| 6 | -3.751818  | 4.108098  | 0.724182  |
| 6 | -3.751818  | 4.108098  | -0.724182 |
| 6 | -3.751817  | 2.681231  | -3.195655 |

|   |           |           |           |
|---|-----------|-----------|-----------|
| 6 | -3.751817 | 1.426897  | -3.919819 |
| 6 | -3.751817 | -1.426897 | -3.919819 |
| 6 | -3.751817 | -2.681231 | -3.195655 |
| 6 | -2.502207 | -3.915248 | 1.427662  |
| 6 | -2.502207 | -3.194034 | 2.676887  |
| 6 | -2.502207 | -0.721231 | 4.104524  |
| 6 | -2.502207 | 0.721231  | 4.104524  |
| 6 | -2.502207 | 3.194034  | 2.676887  |
| 6 | -2.502207 | 3.915248  | 1.427662  |
| 6 | -2.502207 | 3.915248  | -1.427662 |
| 6 | -2.502207 | 3.194034  | -2.676887 |
| 6 | -2.502207 | 0.721231  | -4.104524 |
| 6 | -2.502207 | -0.721231 | -4.104524 |
| 6 | -2.502207 | -3.194034 | -2.676887 |
| 6 | -2.502207 | -3.915248 | -1.427662 |
| 6 | -1.248775 | -2.677555 | 3.194275  |
| 6 | -1.248775 | -1.427537 | 3.915948  |
| 6 | -1.248775 | 1.427537  | 3.915948  |
| 6 | -1.248775 | 2.677555  | 3.194275  |
| 6 | -1.248774 | 4.105065  | 0.721689  |
| 6 | -1.248774 | 4.105065  | -0.721689 |
| 6 | -1.248775 | 2.677555  | -3.194275 |
| 6 | -1.248775 | 1.427537  | -3.915948 |
| 6 | -1.248775 | -1.427537 | -3.915948 |
| 6 | -1.248775 | -2.677555 | -3.194275 |
| 6 | -1.248774 | -4.105065 | -0.721689 |
| 6 | -1.248774 | -4.105065 | 0.721689  |
| 6 | 0.000000  | -0.724256 | 4.108184  |
| 6 | 0.000000  | 0.724256  | 4.108184  |
| 6 | 0.000000  | 3.195691  | 2.681339  |
| 6 | 0.000000  | 3.919930  | 1.426875  |
| 6 | 0.000000  | 3.919930  | -1.426875 |
| 6 | 0.000000  | 3.195691  | -2.681339 |
| 6 | 0.000000  | 0.724256  | -4.108184 |
| 6 | 0.000000  | -0.724256 | -4.108184 |
| 6 | 0.000000  | -3.195691 | -2.681339 |
| 6 | 0.000000  | -3.919930 | -1.426875 |
| 6 | 0.000000  | -3.919930 | 1.426875  |
| 6 | 0.000000  | -3.195691 | 2.681339  |
| 6 | 1.248775  | 1.427537  | 3.915948  |
| 6 | 1.248775  | 2.677555  | 3.194275  |
| 6 | 1.248774  | 4.105065  | 0.721689  |
| 6 | 1.248774  | 4.105065  | -0.721689 |
| 6 | 1.248775  | 2.677555  | -3.194275 |
| 6 | 1.248775  | 1.427537  | -3.915948 |
| 6 | 1.248775  | -1.427537 | -3.915948 |
| 6 | 1.248775  | -2.677555 | -3.194275 |
| 6 | 1.248774  | -4.105065 | -0.721689 |
| 6 | 1.248774  | -4.105065 | 0.721689  |
| 6 | 1.248775  | -2.677555 | 3.194275  |
| 6 | 1.248775  | -1.427537 | 3.915948  |
| 6 | 2.502207  | 3.194034  | 2.676887  |
| 6 | 2.502207  | 3.915248  | 1.427662  |
| 6 | 2.502207  | 3.915248  | -1.427662 |
| 6 | 2.502207  | 3.194034  | -2.676887 |
| 6 | 2.502207  | 0.721231  | -4.104524 |
| 6 | 2.502207  | -0.721231 | -4.104524 |
| 6 | 2.502207  | -3.194034 | -2.676887 |
| 6 | 2.502207  | -3.915248 | -1.427662 |
| 6 | 2.502207  | -3.915248 | 1.427662  |
| 6 | 2.502207  | -3.194034 | 2.676887  |
| 6 | 2.502207  | -0.721231 | 4.104524  |
| 6 | 2.502207  | 0.721231  | 4.104524  |
| 6 | 3.751818  | 4.108098  | 0.724182  |
| 6 | 3.751818  | 4.108098  | -0.724182 |
| 6 | 3.751817  | 2.681231  | -3.195655 |
| 6 | 3.751817  | 1.426897  | -3.919819 |
| 6 | 3.751817  | -1.426897 | -3.919819 |
| 6 | 3.751817  | -2.681231 | -3.195655 |
| 6 | 3.751818  | -4.108098 | -0.724182 |

|   |           |           |           |
|---|-----------|-----------|-----------|
| 6 | 3.751818  | -4.108098 | 0.724182  |
| 6 | 3.751817  | -2.681231 | 3.195655  |
| 6 | 3.751817  | -1.426897 | 3.919819  |
| 6 | 3.751817  | 1.426897  | 3.919819  |
| 6 | 3.751817  | 2.681231  | 3.195655  |
| 6 | 4.999897  | 3.916748  | -1.427396 |
| 6 | 4.999897  | 3.194552  | -2.678320 |
| 6 | 4.999896  | 0.722212  | -4.105689 |
| 6 | 4.999896  | -0.722212 | -4.105689 |
| 6 | 4.999897  | -3.194552 | -2.678320 |
| 6 | 4.999897  | -3.916748 | -1.427396 |
| 6 | 4.999897  | -3.916748 | 1.427396  |
| 6 | 4.999897  | -3.194552 | 2.678320  |
| 6 | 4.999896  | -0.722212 | 4.105689  |
| 6 | 4.999896  | 0.722212  | 4.105689  |
| 6 | 4.999897  | 3.194552  | 2.678320  |
| 6 | 4.999897  | 3.916748  | 1.427396  |
| 6 | 6.253076  | 2.676345  | -3.193834 |
| 6 | 6.253076  | 1.427759  | -3.914680 |
| 6 | 6.253076  | -1.427759 | -3.914680 |
| 6 | 6.253076  | -2.676345 | -3.193834 |
| 6 | 6.253077  | -4.104078 | -0.720862 |
| 6 | 6.253077  | -4.104078 | 0.720862  |
| 6 | 6.253076  | -2.676345 | 3.193834  |
| 6 | 6.253076  | -1.427759 | 3.914680  |
| 6 | 6.253076  | 1.427759  | 3.914680  |
| 6 | 6.253076  | 2.676345  | 3.193834  |
| 6 | 6.253077  | 4.104078  | 0.720862  |
| 6 | 6.253077  | 4.104078  | -0.720862 |
| 6 | 7.503600  | 0.723957  | -4.107831 |
| 6 | 7.503600  | -0.723957 | -4.107831 |
| 6 | 7.503599  | -3.195535 | -2.680903 |
| 6 | 7.503599  | -3.919474 | -1.426958 |
| 6 | 7.503599  | -3.919474 | 1.426958  |
| 6 | 7.503599  | -3.195535 | 2.680903  |
| 6 | 7.503600  | -0.723957 | 4.107831  |
| 6 | 7.503600  | 0.723957  | 4.107831  |
| 6 | 7.503599  | 3.195535  | 2.680903  |
| 6 | 7.503599  | 3.919474  | 1.426958  |
| 6 | 7.503599  | 3.919474  | -1.426958 |
| 6 | 7.503599  | 3.195535  | -2.680903 |
| 6 | 8.751157  | -1.427246 | -3.917603 |
| 6 | 8.751157  | -2.679135 | -3.194850 |
| 6 | 8.751155  | -4.106353 | -0.722770 |
| 6 | 8.751155  | -4.106353 | 0.722770  |
| 6 | 8.751157  | -2.679135 | 3.194850  |
| 6 | 8.751157  | -1.427246 | 3.917603  |
| 6 | 8.751157  | 1.427246  | 3.917603  |
| 6 | 8.751157  | 2.679135  | 3.194850  |
| 6 | 8.751155  | 4.106353  | 0.722770  |
| 6 | 8.751155  | 4.106353  | -0.722770 |
| 6 | 8.751157  | 2.679135  | -3.194850 |
| 6 | 8.751157  | 1.427246  | -3.917603 |
| 6 | 10.003841 | -3.193694 | -2.675974 |
| 6 | 10.003841 | -3.914288 | -1.427823 |
| 6 | 10.003841 | -3.914288 | 1.427823  |
| 6 | 10.003841 | -3.193694 | 2.675974  |
| 6 | 10.003842 | -0.720611 | 4.103773  |
| 6 | 10.003842 | 0.720611  | 4.103773  |
| 6 | 10.003841 | 3.193694  | 2.675974  |
| 6 | 10.003841 | 3.914288  | 1.427823  |
| 6 | 10.003841 | 3.914288  | -1.427823 |
| 6 | 10.003841 | 3.193694  | -2.675974 |
| 6 | 10.003842 | 0.720611  | -4.103773 |
| 6 | 10.003842 | -0.720611 | -4.103773 |
| 6 | 11.255312 | -4.107398 | -0.723593 |
| 6 | 11.255312 | -4.107398 | 0.723593  |
| 6 | 11.255311 | -2.680371 | 3.195343  |
| 6 | 11.255312 | -1.427056 | 3.918919  |
| 6 | 11.255312 | 1.427056  | 3.918919  |



|   |           |           |           |
|---|-----------|-----------|-----------|
| 6 | 11.255311 | 2.680371  | 3.195343  |
| 6 | 11.255312 | 4.107398  | 0.723593  |
| 6 | 11.255312 | 4.107398  | -0.723593 |
| 6 | 11.255311 | 2.680371  | -3.195343 |
| 6 | 11.255312 | 1.427056  | -3.918919 |
| 6 | 11.255312 | -1.427056 | -3.918919 |
| 6 | 11.255311 | -2.680371 | -3.195343 |
| 6 | 12.502580 | -3.918479 | 1.427102  |
| 6 | 12.502580 | -3.195162 | 2.679967  |
| 6 | 12.502579 | -0.723334 | 4.107040  |
| 6 | 12.502579 | 0.723334  | 4.107040  |
| 6 | 12.502580 | 3.195162  | 2.679967  |
| 6 | 12.502580 | 3.918479  | 1.427102  |
| 6 | 12.502580 | 3.918479  | -1.427102 |
| 6 | 12.502580 | 3.195162  | -2.679967 |
| 6 | 12.502579 | 0.723334  | -4.107040 |
| 6 | 12.502579 | -0.723334 | -4.107040 |
| 6 | 12.502580 | -3.195162 | -2.679967 |
| 6 | 12.502580 | -3.918479 | -1.427102 |
| 6 | 13.754556 | -2.675816 | 3.193640  |
| 6 | 13.754556 | -1.427854 | 3.914125  |
| 6 | 13.754556 | 1.427854  | 3.914125  |
| 6 | 13.754556 | 2.675816  | 3.193640  |
| 6 | 13.754555 | 4.103646  | 0.720502  |
| 6 | 13.754555 | 4.103646  | -0.720502 |
| 6 | 13.754556 | 2.675816  | -3.193640 |
| 6 | 13.754556 | 1.427854  | -3.914125 |
| 6 | 13.754556 | -1.427854 | -3.914125 |
| 6 | 13.754556 | -2.675816 | -3.193640 |
| 6 | 13.754555 | -4.103646 | -0.720502 |
| 6 | 13.754555 | -4.103646 | 0.720502  |
| 6 | 15.006946 | -0.723094 | 4.106804  |
| 6 | 15.006946 | 0.723094  | 4.106804  |
| 6 | 15.006945 | 3.195078  | 2.679642  |
| 6 | 15.006944 | 3.918155  | 1.427191  |
| 6 | 15.006944 | 3.918155  | -1.427191 |
| 6 | 15.006945 | 3.195078  | -2.679642 |
| 6 | 15.006946 | 0.723094  | -4.106804 |
| 6 | 15.006946 | -0.723094 | -4.106804 |
| 6 | 15.006945 | -3.195078 | -2.679642 |
| 6 | 15.006944 | -3.918155 | -1.427191 |
| 6 | 15.006944 | -3.918155 | 1.427191  |
| 6 | 15.006945 | -3.195078 | 2.679642  |
| 6 | 16.254175 | 1.426963  | 3.919291  |
| 6 | 16.254175 | 2.680742  | 3.195448  |
| 6 | 16.254174 | 4.107675  | 0.723861  |
| 6 | 16.254174 | 4.107675  | -0.723861 |
| 6 | 16.254175 | 2.680742  | -3.195448 |
| 6 | 16.254175 | 1.426963  | -3.919291 |
| 6 | 16.254175 | -1.426963 | -3.919291 |
| 6 | 16.254175 | -2.680742 | -3.195448 |
| 6 | 16.254174 | -4.107675 | -0.723861 |
| 6 | 16.254174 | -4.107675 | 0.723861  |
| 6 | 16.254175 | -2.680742 | 3.195448  |
| 6 | 16.254175 | -1.426963 | 3.919291  |
| 6 | 17.505226 | 3.193658  | 2.675895  |
| 6 | 17.505226 | 3.914203  | 1.427830  |
| 6 | 17.505226 | 3.914203  | -1.427830 |
| 6 | 17.505226 | 3.193658  | -2.675895 |
| 6 | 17.505227 | 0.720561  | -4.103700 |
| 6 | 17.505227 | -0.720561 | -4.103700 |
| 6 | 17.505226 | -3.193658 | -2.675895 |
| 6 | 17.505226 | -3.914203 | -1.427830 |
| 6 | 17.505226 | -3.914203 | 1.427830  |
| 6 | 17.505226 | -3.193658 | 2.675895  |
| 6 | 17.505227 | -0.720561 | 4.103700  |
| 6 | 17.505227 | 0.720561  | 4.103700  |
| 6 | 18.758434 | 4.106090  | 0.722496  |
| 6 | 18.758434 | 4.106090  | -0.722496 |
| 6 | 18.758434 | 2.678766  | -3.194756 |

|   |           |           |           |
|---|-----------|-----------|-----------|
| 6 | 18.758435 | 1.427351  | -3.917234 |
| 6 | 18.758435 | -1.427351 | -3.917234 |
| 6 | 18.758434 | -2.678766 | -3.194756 |
| 6 | 18.758434 | -4.106090 | -0.722496 |
| 6 | 18.758434 | -4.106090 | 0.722496  |
| 6 | 18.758434 | -2.678766 | 3.194756  |
| 6 | 18.758435 | -1.427351 | 3.917234  |
| 6 | 18.758435 | 1.427351  | 3.917234  |
| 6 | 18.758434 | 2.678766  | 3.194756  |
| 6 | 20.005920 | 3.920004  | -1.426851 |
| 6 | 20.005920 | 3.195707  | -2.681412 |
| 6 | 20.005921 | 0.724313  | -4.108230 |
| 6 | 20.005921 | -0.724313 | -4.108230 |
| 6 | 20.005920 | -3.195707 | -2.681412 |
| 6 | 20.005920 | -3.920004 | -1.426851 |
| 6 | 20.005920 | -3.920004 | 1.426851  |
| 6 | 20.005920 | -3.195707 | 2.681412  |
| 6 | 20.005921 | -0.724313 | 4.108230  |
| 6 | 20.005921 | 0.724313  | 4.108230  |
| 6 | 20.005920 | 3.195707  | 2.681412  |
| 6 | 20.005920 | 3.920004  | 1.426851  |
| 6 | 21.255917 | 2.676227  | -3.193765 |
| 6 | 21.255918 | 1.427760  | -3.914540 |
| 6 | 21.255918 | -1.427760 | -3.914540 |
| 6 | 21.255917 | -2.676227 | -3.193765 |
| 6 | 21.255915 | -4.103964 | -0.720793 |
| 6 | 21.255915 | -4.103964 | 0.720793  |
| 6 | 21.255917 | -2.676227 | 3.193765  |
| 6 | 21.255918 | -1.427760 | 3.914540  |
| 6 | 21.255918 | 1.427760  | 3.914540  |
| 6 | 21.255917 | 2.676227  | 3.193765  |
| 6 | 21.255915 | 4.103964  | 0.720793  |
| 6 | 21.255915 | 4.103964  | -0.720793 |
| 6 | 22.509792 | 0.721831  | -4.105284 |
| 6 | 22.509792 | -0.721831 | -4.105284 |
| 6 | 22.509790 | -3.194400 | -2.677789 |
| 6 | 22.509789 | -3.916217 | -1.427526 |
| 6 | 22.509789 | -3.916217 | 1.427526  |
| 6 | 22.509790 | -3.194400 | 2.677789  |
| 6 | 22.509792 | -0.721831 | 4.105284  |
| 6 | 22.509792 | 0.721831  | 4.105284  |
| 6 | 22.509790 | 3.194400  | 2.677789  |
| 6 | 22.509789 | 3.916217  | 1.427526  |
| 6 | 22.509789 | 3.916217  | -1.427526 |
| 6 | 22.509790 | 3.194400  | -2.677789 |
| 6 | 23.757804 | -1.426758 | -3.920522 |
| 6 | 23.757803 | -2.681918 | -3.195884 |
| 6 | 23.757801 | -4.108649 | -0.724658 |
| 6 | 23.757801 | -4.108649 | 0.724658  |
| 6 | 23.757803 | -2.681918 | 3.195884  |
| 6 | 23.757804 | -1.426758 | 3.920522  |
| 6 | 23.757804 | 1.426758  | 3.920522  |
| 6 | 23.757803 | 2.681918  | 3.195884  |
| 6 | 23.757801 | 4.108649  | 0.724658  |
| 6 | 23.757801 | 4.108649  | -0.724658 |
| 6 | 23.757803 | 2.681918  | -3.195884 |
| 6 | 23.757804 | 1.426758  | -3.920522 |
| 6 | 25.006635 | -3.193963 | -2.676801 |
| 6 | 25.006634 | -3.915147 | -1.427638 |
| 6 | 25.006634 | -3.915147 | 1.427638  |
| 6 | 25.006635 | -3.193963 | 2.676801  |
| 6 | 25.006636 | -0.721197 | 4.104408  |
| 6 | 25.006636 | 0.721197  | 4.104408  |
| 6 | 25.006635 | 3.193963  | 2.676801  |
| 6 | 25.006634 | 3.915147  | 1.427638  |
| 6 | 25.006634 | 3.915147  | -1.427638 |
| 6 | 25.006635 | 3.193963  | -2.676801 |
| 6 | 25.006636 | 0.721197  | -4.104408 |
| 6 | 25.006636 | -0.721197 | -4.104408 |
| 6 | 26.260965 | -4.104432 | -0.721106 |

|   |           |           |           |
|---|-----------|-----------|-----------|
| 6 | 26.260965 | -4.104432 | 0.721106  |
| 6 | 26.260966 | -2.676730 | 3.194003  |
| 6 | 26.260967 | -1.427720 | 3.915087  |
| 6 | 26.260967 | 1.427720  | 3.915087  |
| 6 | 26.260966 | 2.676730  | 3.194003  |
| 6 | 26.260965 | 4.104432  | 0.721106  |
| 6 | 26.260965 | 4.104432  | -0.721106 |
| 6 | 26.260966 | 2.676730  | -3.194003 |
| 6 | 26.260967 | 1.427720  | -3.915087 |
| 6 | 26.260967 | -1.427720 | -3.915087 |
| 6 | 26.260966 | -2.676730 | -3.194003 |
| 6 | 27.509839 | -3.920865 | 1.426685  |
| 6 | 27.509841 | -3.195994 | 2.682230  |
| 6 | 27.509843 | -0.724882 | 4.108874  |
| 6 | 27.509843 | 0.724882  | 4.108874  |
| 6 | 27.509841 | 3.195994  | 2.682230  |
| 6 | 27.509839 | 3.920865  | 1.426685  |
| 6 | 27.509839 | 3.920865  | -1.426685 |
| 6 | 27.509841 | 3.195994  | -2.682230 |
| 6 | 27.509843 | 0.724882  | -4.108874 |
| 6 | 27.509843 | -0.724882 | -4.108874 |
| 6 | 27.509841 | -3.195994 | -2.682230 |
| 6 | 27.509839 | -3.920865 | -1.426685 |
| 6 | 28.757408 | -2.677628 | 3.194196  |
| 6 | 28.757409 | -1.427443 | 3.915956  |
| 6 | 28.757409 | 1.427443  | 3.915956  |
| 6 | 28.757408 | 2.677628  | 3.194196  |
| 6 | 28.757405 | 4.105056  | 0.721783  |
| 6 | 28.757405 | 4.105056  | -0.721783 |
| 6 | 28.757408 | 2.677628  | -3.194196 |
| 6 | 28.757409 | 1.427443  | -3.915956 |
| 6 | 28.757409 | -1.427443 | -3.915956 |
| 6 | 28.757408 | -2.677628 | -3.194196 |
| 6 | 28.757405 | -4.105056 | -0.721783 |
| 6 | 28.757405 | -4.105056 | 0.721783  |
| 6 | 30.011997 | -0.720295 | 4.103451  |
| 6 | 30.011997 | 0.720295  | 4.103451  |
| 6 | 30.011993 | 3.193602  | 2.675544  |
| 6 | 30.011993 | 3.913889  | 1.427945  |
| 6 | 30.011993 | 3.913889  | -1.427945 |
| 6 | 30.011993 | 3.193602  | -2.675544 |
| 6 | 30.011997 | 0.720295  | -4.103451 |
| 6 | 30.011997 | -0.720295 | -4.103451 |
| 6 | 30.011993 | -3.193602 | -2.675544 |
| 6 | 30.011993 | -3.913889 | -1.427945 |
| 6 | 30.011993 | -3.913889 | 1.427945  |
| 6 | 30.011993 | -3.193602 | 2.675544  |
| 6 | 31.262160 | 1.426725  | 3.921245  |
| 6 | 31.262159 | 2.682580  | 3.196216  |
| 6 | 31.262159 | 4.109290  | 0.725057  |
| 6 | 31.262159 | 4.109290  | -0.725057 |
| 6 | 31.262159 | 2.682580  | -3.196216 |
| 6 | 31.262160 | 1.426725  | -3.921245 |
| 6 | 31.262160 | -1.426725 | -3.921245 |
| 6 | 31.262159 | -2.682580 | -3.196216 |
| 6 | 31.262159 | -4.109290 | -0.725057 |
| 6 | 31.262159 | -4.109290 | 0.725057  |
| 6 | 31.262159 | -2.682580 | 3.196216  |
| 6 | 31.262160 | -1.426725 | 3.921245  |
| 6 | 32.508195 | 3.195114  | 2.679222  |
| 6 | 32.508195 | 3.917836  | 1.427414  |
| 6 | 32.508195 | 3.917836  | -1.427414 |
| 6 | 32.508195 | 3.195114  | -2.679222 |
| 6 | 32.508194 | 0.722727  | -4.106588 |
| 6 | 32.508194 | -0.722727 | -4.106588 |
| 6 | 32.508195 | -3.195114 | -2.679222 |
| 6 | 32.508195 | -3.917836 | -1.427414 |
| 6 | 32.508195 | -3.917836 | 1.427414  |
| 6 | 32.508195 | -3.195114 | 2.679222  |
| 6 | 32.508194 | -0.722727 | 4.106588  |

|   |           |           |           |
|---|-----------|-----------|-----------|
| 6 | 32.508194 | 0.722727  | 4.106588  |
| 6 | 33.762607 | 4.102815  | 0.719151  |
| 6 | 33.762607 | 4.102815  | -0.719151 |
| 6 | 33.762605 | 2.674223  | -3.193551 |
| 6 | 33.762605 | 1.428593  | -3.912673 |
| 6 | 33.762605 | -1.428593 | -3.912673 |
| 6 | 33.762605 | -2.674223 | -3.193551 |
| 6 | 33.762607 | -4.102815 | -0.719151 |
| 6 | 33.762607 | -4.102815 | 0.719151  |
| 6 | 33.762605 | -2.674223 | 3.193551  |
| 6 | 33.762605 | -1.428593 | 3.912673  |
| 6 | 33.762605 | 1.428593  | 3.912673  |
| 6 | 33.762605 | 2.674223  | 3.193551  |
| 6 | 35.014995 | 3.920372  | -1.426346 |
| 6 | 35.014992 | 3.195455  | -2.681946 |
| 6 | 35.014992 | 0.724919  | -4.108239 |
| 6 | 35.014992 | -0.724919 | -4.108239 |
| 6 | 35.014992 | -3.195455 | -2.681946 |
| 6 | 35.014995 | -3.920372 | -1.426346 |
| 6 | 35.014995 | -3.920372 | 1.426346  |
| 6 | 35.014992 | -3.195455 | 2.681946  |
| 6 | 35.014992 | -0.724919 | 4.108239  |
| 6 | 35.014992 | 0.724919  | 4.108239  |
| 6 | 35.014992 | 3.195455  | 2.681946  |
| 6 | 35.014995 | 3.920372  | 1.426346  |
| 6 | 36.258682 | 2.677906  | -3.191196 |
| 6 | 36.258679 | 1.424724  | -3.914681 |
| 6 | 36.258679 | -1.424724 | -3.914681 |
| 6 | 36.258682 | -2.677906 | -3.191196 |
| 6 | 36.258687 | -4.102632 | -0.723513 |
| 6 | 36.258687 | -4.102632 | 0.723513  |
| 6 | 36.258682 | -2.677906 | 3.191196  |
| 6 | 36.258679 | -1.424724 | 3.914681  |
| 6 | 36.258679 | 1.424724  | 3.914681  |
| 6 | 36.258682 | 2.677906  | 3.191196  |
| 6 | 36.258687 | 4.102632  | 0.723513  |
| 6 | 36.258687 | 4.102632  | -0.723513 |
| 6 | 37.512696 | 0.715070  | -4.086778 |
| 6 | 37.512696 | -0.715070 | -4.086778 |
| 6 | 37.512702 | -3.181789 | -2.662678 |
| 6 | 37.512713 | -3.896870 | -1.424132 |
| 6 | 37.512713 | -3.896870 | 1.424132  |
| 6 | 37.512702 | -3.181789 | 2.662678  |
| 6 | 37.512696 | -0.715070 | 4.086778  |
| 6 | 37.512696 | 0.715070  | 4.086778  |
| 6 | 37.512702 | 3.181789  | 2.662678  |
| 6 | 37.512713 | 3.896870  | 1.424132  |
| 6 | 37.512713 | 3.896870  | -1.424132 |
| 6 | 37.512702 | 3.181789  | -2.662678 |
| 6 | 38.773804 | -1.420166 | -3.911824 |
| 6 | 38.773802 | -2.677699 | -3.185833 |
| 6 | 38.773835 | -4.097865 | -0.726023 |
| 6 | 38.773835 | -4.097865 | 0.726023  |
| 6 | 38.773802 | -2.677699 | 3.185833  |
| 6 | 38.773804 | -1.420166 | 3.911824  |
| 6 | 38.773804 | 1.420166  | 3.911824  |
| 6 | 38.773802 | 2.677699  | 3.185833  |
| 6 | 38.773835 | 4.097865  | 0.726023  |
| 6 | 38.773835 | 4.097865  | -0.726023 |
| 6 | 38.773802 | 2.677699  | -3.185833 |
| 6 | 38.773804 | 1.420166  | -3.911824 |
| 6 | 40.014117 | -3.224063 | -2.709719 |
| 6 | 40.014144 | -3.958654 | -1.437259 |
| 6 | 40.014144 | -3.958654 | 1.437259  |
| 6 | 40.014117 | -3.224063 | 2.709719  |
| 6 | 40.014113 | -0.734636 | 4.146903  |
| 6 | 40.014113 | 0.734636  | 4.146903  |
| 6 | 40.014117 | 3.224063  | 2.709719  |
| 6 | 40.014144 | 3.958654  | 1.437259  |
| 6 | 40.014144 | 3.958654  | -1.437259 |

|   |            |           |           |
|---|------------|-----------|-----------|
| 6 | 40.014117  | 3.224063  | -2.709719 |
| 6 | 40.014113  | 0.734636  | -4.146903 |
| 6 | 40.014113  | -0.734636 | -4.146903 |
| 6 | 41.229931  | -4.211889 | -0.691852 |
| 6 | 41.229931  | -4.211889 | 0.691852  |
| 6 | 41.229870  | -2.705221 | 3.301890  |
| 6 | 41.229871  | -1.506882 | 3.993714  |
| 6 | 41.229871  | 1.506882  | 3.993714  |
| 6 | 41.229870  | 2.705221  | 3.301890  |
| 6 | 41.229931  | 4.211889  | 0.691852  |
| 6 | 41.229931  | 4.211889  | -0.691852 |
| 6 | 41.229870  | 2.705221  | -3.301890 |
| 6 | 41.229871  | 1.506882  | -3.993714 |
| 6 | 41.229871  | -1.506882 | -3.993714 |
| 6 | 41.229870  | -2.705221 | -3.301890 |
| 1 | -42.186179 | 4.275879  | 1.226824  |
| 1 | -42.186179 | 4.275879  | -1.226824 |
| 1 | -42.186107 | 3.200604  | -3.089970 |
| 1 | -42.186106 | 1.075665  | -4.316771 |
| 1 | -42.186106 | -1.075665 | -4.316771 |
| 1 | -42.186107 | -3.200604 | -3.089970 |
| 1 | -42.186179 | -4.275879 | -1.226824 |
| 1 | -42.186179 | -4.275879 | 1.226824  |
| 1 | -42.186107 | -3.200604 | 3.089970  |
| 1 | -42.186106 | -1.075665 | 4.316771  |
| 1 | -42.186106 | 1.075665  | 4.316771  |
| 1 | -42.186107 | 3.200604  | 3.089970  |
| 1 | 42.186179  | -4.275879 | -1.226824 |
| 1 | 42.186179  | -4.275879 | 1.226824  |
| 1 | 42.186107  | -3.200604 | 3.089970  |
| 1 | 42.186106  | -1.075665 | 4.316771  |
| 1 | 42.186106  | 1.075665  | 4.316771  |
| 1 | 42.186107  | 3.200604  | 3.089970  |
| 1 | 42.186179  | 4.275879  | 1.226824  |
| 1 | 42.186179  | 4.275879  | -1.226824 |
| 1 | 42.186107  | 3.200604  | -3.089970 |
| 1 | 42.186106  | 1.075665  | -4.316771 |
| 1 | 42.186106  | -1.075665 | -4.316771 |
| 1 | 42.186107  | -3.200604 | -3.089970 |

Nanotube (6,6) u34v0s  
B3LYP/STO-3G Energy: -30734.740115

|   |           |           |            |
|---|-----------|-----------|------------|
| C | 3.302688  | 2.706788  | -41.837150 |
| C | 3.995464  | 1.506796  | -41.837152 |
| C | 3.995464  | -1.506796 | -41.837152 |
| C | 3.302688  | -2.706788 | -41.837150 |
| C | 0.692805  | -4.213384 | -41.837207 |
| C | -0.692806 | -4.213384 | -41.837207 |
| C | -3.302688 | -2.706787 | -41.837150 |
| C | -3.995465 | -1.506796 | -41.837152 |
| C | -3.995465 | 1.506796  | -41.837152 |
| C | -3.302688 | 2.706788  | -41.837150 |
| C | -0.692806 | 4.213384  | -41.837207 |
| C | 0.692805  | 4.213384  | -41.837207 |
| C | 4.149629  | 0.736202  | -40.623358 |
| C | 4.149629  | -0.736202 | -40.623358 |
| C | 2.712438  | -3.225646 | -40.623359 |
| C | 1.437268  | -3.961809 | -40.623385 |
| C | -1.437268 | -3.961809 | -40.623385 |
| C | -2.712438 | -3.225646 | -40.623359 |
| C | -4.149629 | -0.736202 | -40.623358 |
| C | -4.149629 | 0.736202  | -40.623358 |
| C | -2.712438 | 3.225646  | -40.623359 |
| C | -1.437269 | 3.961809  | -40.623385 |
| C | 1.437268  | 3.961809  | -40.623385 |
| C | 2.712437  | 3.225646  | -40.623359 |
| C | 3.911736  | -1.420565 | -39.383308 |

|   |           |           |            |
|---|-----------|-----------|------------|
| C | 3.186134  | -2.677425 | -39.383305 |
| C | 0.725635  | -4.097999 | -39.383336 |
| C | -0.725635 | -4.097999 | -39.383336 |
| C | -3.186134 | -2.677425 | -39.383305 |
| C | -3.911737 | -1.420565 | -39.383308 |
| C | -3.911737 | 1.420565  | -39.383308 |
| C | -3.186134 | 2.677426  | -39.383305 |
| C | -0.725635 | 4.097999  | -39.383336 |
| C | 0.725635  | 4.097999  | -39.383336 |
| C | 3.186134  | 2.677426  | -39.383305 |
| C | 3.911736  | 1.420565  | -39.383308 |
| C | 2.664102  | -3.182744 | -38.121101 |
| C | 1.424246  | -3.898585 | -38.121112 |
| C | -1.424247 | -3.898585 | -38.121112 |
| C | -2.664102 | -3.182744 | -38.121101 |
| C | -4.088317 | -0.715828 | -38.121097 |
| C | -4.088317 | 0.715828  | -38.121097 |
| C | -2.664102 | 3.182744  | -38.121101 |
| C | -1.424247 | 3.898585  | -38.121112 |
| C | 1.424246  | 3.898585  | -38.121112 |
| C | 2.664102  | 3.182744  | -38.121101 |
| C | 4.088317  | 0.715828  | -38.121097 |
| C | 4.088317  | -0.715828 | -38.121097 |
| C | 0.725267  | -4.105388 | -36.869399 |
| C | -0.725268 | -4.105388 | -36.869399 |
| C | -3.192700 | -2.680801 | -36.869395 |
| C | -3.917940 | -1.424582 | -36.869393 |
| C | -3.917940 | 1.424582  | -36.869393 |
| C | -3.192700 | 2.680801  | -36.869395 |
| C | -0.725268 | 4.105388  | -36.869399 |
| C | 0.725267  | 4.105388  | -36.869399 |
| C | 3.192700  | 2.680801  | -36.869395 |
| C | 3.917940  | 1.424582  | -36.869394 |
| C | 3.917940  | -1.424582 | -36.869394 |
| C | 3.192700  | -2.680801 | -36.869395 |
| C | -1.426790 | -3.920270 | -35.626332 |
| C | -2.681633 | -3.195787 | -35.626329 |
| C | -4.108374 | -0.724483 | -35.626331 |
| C | -4.108374 | 0.724483  | -35.626331 |
| C | -2.681633 | 3.195787  | -35.626329 |
| C | -1.426790 | 3.920270  | -35.626332 |
| C | 1.426790  | 3.920270  | -35.626332 |
| C | 2.681633  | 3.195787  | -35.626329 |
| C | 4.108374  | 0.724483  | -35.626331 |
| C | 4.108374  | -0.724483 | -35.626331 |
| C | 2.681633  | -3.195787 | -35.626329 |
| C | 1.426790  | -3.920270 | -35.626332 |
| C | -3.194396 | -2.675309 | -34.372324 |
| C | -3.914039 | -1.428781 | -34.372324 |
| C | -3.914039 | 1.428781  | -34.372324 |
| C | -3.194396 | 2.675309  | -34.372324 |
| C | -0.719670 | 4.104094  | -34.372324 |
| C | 0.719670  | 4.104094  | -34.372324 |
| C | 3.194395  | 2.675309  | -34.372324 |
| C | 3.914038  | 1.428781  | -34.372324 |
| C | 3.914038  | -1.428781 | -34.372324 |
| C | 3.194395  | -2.675309 | -34.372324 |
| C | 0.719670  | -4.104094 | -34.372324 |
| C | -0.719670 | -4.104094 | -34.372324 |
| C | -4.109732 | -0.724798 | -33.120248 |
| C | -4.109732 | 0.724798  | -33.120248 |
| C | -2.682586 | 3.196797  | -33.120248 |
| C | -1.427193 | 3.921591  | -33.120248 |
| C | 1.427192  | 3.921591  | -33.120248 |
| C | 2.682586  | 3.196797  | -33.120248 |
| C | 4.109732  | 0.724798  | -33.120248 |
| C | 4.109732  | -0.724798 | -33.120248 |
| C | 2.682586  | -3.196797 | -33.120248 |
| C | 1.427192  | -3.921591 | -33.120248 |
| C | -1.427193 | -3.921591 | -33.120248 |

|   |           |           |            |
|---|-----------|-----------|------------|
| C | -2.682586 | -3.196797 | -33.120248 |
| C | -3.921218 | 1.427148  | -31.875417 |
| C | -3.196567 | 2.682341  | -31.875417 |
| C | -0.724676 | 4.109479  | -31.875416 |
| C | 0.724675  | 4.109479  | -31.875416 |
| C | 3.196567  | 2.682341  | -31.875417 |
| C | 3.921218  | 1.427148  | -31.875417 |
| C | 3.921218  | -1.427148 | -31.875417 |
| C | 3.196567  | -2.682341 | -31.875417 |
| C | 0.724675  | -4.109479 | -31.875416 |
| C | -0.724676 | -4.109479 | -31.875416 |
| C | -3.196567 | -2.682341 | -31.875417 |
| C | -3.921218 | -1.427148 | -31.875417 |
| C | -2.676117 | 3.194251  | -30.623119 |
| C | -1.428221 | 3.914712  | -30.623118 |
| C | 1.428221  | 3.914712  | -30.623118 |
| C | 2.676117  | 3.194251  | -30.623119 |
| C | 4.104304  | 0.720467  | -30.623122 |
| C | 4.104304  | -0.720467 | -30.623122 |
| C | 2.676117  | -3.194251 | -30.623119 |
| C | 1.428221  | -3.914712 | -30.623118 |
| C | -1.428221 | -3.914712 | -30.623118 |
| C | -2.676117 | -3.194251 | -30.623119 |
| C | -4.104304 | -0.720467 | -30.623122 |
| C | -4.104304 | 0.720467  | -30.623122 |
| C | -0.724141 | 4.108529  | -29.370656 |
| C | 0.724141  | 4.108529  | -29.370656 |
| C | 3.196023  | 2.681405  | -29.370660 |
| C | 3.920142  | 1.427138  | -29.370662 |
| C | 3.920142  | -1.427138 | -29.370662 |
| C | 3.196023  | -2.681405 | -29.370660 |
| C | 0.724141  | -4.108529 | -29.370656 |
| C | -0.724141 | -4.108529 | -29.370656 |
| C | -3.196023 | -2.681405 | -29.370660 |
| C | -3.920142 | -1.427138 | -29.370661 |
| C | -3.920142 | 1.427138  | -29.370661 |
| C | -3.196023 | 2.681405  | -29.370660 |
| C | 1.427110  | 3.921069  | -28.124968 |
| C | 2.682191  | 3.196463  | -28.124970 |
| C | 4.109265  | 0.724615  | -28.124973 |
| C | 4.109265  | -0.724615 | -28.124973 |
| C | 2.682191  | -3.196463 | -28.124970 |
| C | 1.427110  | -3.921069 | -28.124968 |
| C | -1.427110 | -3.921069 | -28.124968 |
| C | -2.682191 | -3.196463 | -28.124970 |
| C | -4.109265 | -0.724615 | -28.124973 |
| C | -4.109265 | 0.724615  | -28.124973 |
| C | -2.682191 | 3.196463  | -28.124969 |
| C | -1.427110 | 3.921069  | -28.124968 |
| C | 3.194413  | 2.676630  | -26.873566 |
| C | 3.915210  | 1.428123  | -26.873567 |
| C | 3.915210  | -1.428123 | -26.873567 |
| C | 3.194413  | -2.676630 | -26.873566 |
| C | 0.720816  | -4.104740 | -26.873564 |
| C | -0.720816 | -4.104740 | -26.873564 |
| C | -3.194413 | -2.676630 | -26.873566 |
| C | -3.915210 | -1.428123 | -26.873567 |
| C | -3.915210 | 1.428123  | -26.873567 |
| C | -3.194413 | 2.676630  | -26.873566 |
| C | -0.720816 | 4.104740  | -26.873564 |
| C | 0.720816  | 4.104740  | -26.873564 |
| C | 4.108132  | 0.723731  | -25.620990 |
| C | 4.108132  | -0.723731 | -25.620990 |
| C | 2.680857  | -3.195917 | -25.620990 |
| C | 1.427306  | -3.919636 | -25.620989 |
| C | -1.427306 | -3.919636 | -25.620989 |
| C | -2.680857 | -3.195917 | -25.620990 |
| C | -4.108132 | -0.723731 | -25.620990 |
| C | -4.108132 | 0.723731  | -25.620990 |
| C | -2.680857 | 3.195917  | -25.620990 |

|   |           |           |            |
|---|-----------|-----------|------------|
| C | -1.427306 | 3.919636  | -25.620989 |
| C | 1.427306  | 3.919636  | -25.620989 |
| C | 2.680857  | 3.195917  | -25.620990 |
| C | 3.921137  | -1.427095 | -24.374800 |
| C | 3.196483  | -2.682278 | -24.374799 |
| C | 0.724672  | -4.109350 | -24.374798 |
| C | -0.724672 | -4.109350 | -24.374798 |
| C | -3.196483 | -2.682278 | -24.374799 |
| C | -3.921137 | -1.427095 | -24.374800 |
| C | -3.921137 | 1.427095  | -24.374800 |
| C | -3.196483 | 2.682278  | -24.374799 |
| C | -0.724672 | 4.109350  | -24.374798 |
| C | 0.724672  | 4.109350  | -24.374798 |
| C | 3.196483  | 2.682278  | -24.374799 |
| C | 3.921137  | 1.427095  | -24.374800 |
| C | 2.677018  | -3.194553 | -23.124003 |
| C | 1.428043  | -3.915629 | -23.124002 |
| C | -1.428043 | -3.915629 | -23.124002 |
| C | -2.677018 | -3.194553 | -23.124003 |
| C | -4.105037 | -0.721089 | -23.124005 |
| C | -4.105037 | 0.721089  | -23.124005 |
| C | -2.677018 | 3.194553  | -23.124003 |
| C | -1.428043 | 3.915629  | -23.124002 |
| C | 1.428043  | 3.915629  | -23.124002 |
| C | 2.677018  | 3.194553  | -23.124003 |
| C | 4.105037  | 0.721089  | -23.124005 |
| C | 4.105037  | -0.721089 | -23.124005 |
| C | 0.723454  | -4.107780 | -21.871328 |
| C | -0.723454 | -4.107780 | -21.871328 |
| C | -3.195736 | -2.680438 | -21.871330 |
| C | -3.919174 | -1.427365 | -21.871331 |
| C | -3.919174 | 1.427365  | -21.871331 |
| C | -3.195736 | 2.680438  | -21.871330 |
| C | -0.723454 | 4.107780  | -21.871328 |
| C | 0.723454  | 4.107780  | -21.871328 |
| C | 3.195736  | 2.680438  | -21.871330 |
| C | 3.919174  | 1.427365  | -21.871331 |
| C | 3.919174  | -1.427365 | -21.871331 |
| C | 3.195736  | -2.680438 | -21.871330 |
| C | -1.427058 | -3.921213 | -20.624727 |
| C | -2.682354 | -3.196488 | -20.624728 |
| C | -4.109383 | -0.724739 | -20.624729 |
| C | -4.109383 | 0.724738  | -20.624729 |
| C | -2.682354 | 3.196488  | -20.624728 |
| C | -1.427058 | 3.921213  | -20.624727 |
| C | 1.427058  | 3.921213  | -20.624727 |
| C | 2.682354  | 3.196488  | -20.624728 |
| C | 4.109383  | 0.724738  | -20.624729 |
| C | 4.109383  | -0.724739 | -20.624729 |
| C | 2.682354  | -3.196488 | -20.624728 |
| C | 1.427058  | -3.921213 | -20.624727 |
| C | -3.194657 | -2.677374 | -19.374419 |
| C | -3.915984 | -1.427958 | -19.374420 |
| C | -3.915984 | 1.427958  | -19.374420 |
| C | -3.194657 | 2.677373  | -19.374419 |
| C | -0.721342 | 4.105312  | -19.374419 |
| C | 0.721342  | 4.105312  | -19.374419 |
| C | 3.194657  | 2.677373  | -19.374419 |
| C | 3.915984  | 1.427958  | -19.374420 |
| C | 3.915984  | -1.427958 | -19.374420 |
| C | 3.194657  | -2.677374 | -19.374419 |
| C | 0.721342  | -4.105312 | -19.374419 |
| C | -0.721342 | -4.105312 | -19.374419 |
| C | -4.107517 | -0.723230 | -18.121670 |
| C | -4.107517 | 0.723230  | -18.121670 |
| C | -2.680113 | 3.195624  | -18.121671 |
| C | -1.427428 | 3.918840  | -18.121671 |
| C | 1.427428  | 3.918840  | -18.121671 |
| C | 2.680113  | 3.195624  | -18.121671 |
| C | 4.107517  | 0.723230  | -18.121670 |



|   |           |           |            |
|---|-----------|-----------|------------|
| C | 4.107517  | -0.723230 | -18.121670 |
| C | 2.680113  | -3.195624 | -18.121671 |
| C | 1.427428  | -3.918840 | -18.121671 |
| C | -1.427428 | -3.918840 | -18.121671 |
| C | -2.680113 | -3.195624 | -18.121671 |
| C | -3.921287 | 1.427048  | -16.874720 |
| C | -3.196517 | 2.682426  | -16.874720 |
| C | -0.724785 | 4.109447  | -16.874720 |
| C | 0.724785  | 4.109447  | -16.874720 |
| C | 3.196517  | 2.682426  | -16.874720 |
| C | 3.921288  | 1.427048  | -16.874720 |
| C | 3.921288  | -1.427048 | -16.874720 |
| C | 3.196517  | -2.682426 | -16.874720 |
| C | 0.724785  | -4.109447 | -16.874720 |
| C | -0.724785 | -4.109447 | -16.874720 |
| C | -3.196517 | -2.682426 | -16.874720 |
| C | -3.921287 | -1.427048 | -16.874720 |
| C | -2.677658 | 3.194780  | -15.624827 |
| C | -1.427922 | 3.916292  | -15.624827 |
| C | 1.427922  | 3.916292  | -15.624827 |
| C | 2.677658  | 3.194780  | -15.624827 |
| C | 4.105559  | 0.721527  | -15.624828 |
| C | 4.105559  | -0.721527 | -15.624828 |
| C | 2.677658  | -3.194780 | -15.624827 |
| C | 1.427923  | -3.916292 | -15.624827 |
| C | -1.427922 | -3.916292 | -15.624827 |
| C | -2.677658 | -3.194780 | -15.624827 |
| C | -4.105559 | -0.721527 | -15.624828 |
| C | -4.105559 | 0.721527  | -15.624828 |
| C | -0.722994 | 4.107283  | -14.372013 |
| C | 0.722994  | 4.107283  | -14.372013 |
| C | 3.195539  | 2.679791  | -14.372014 |
| C | 3.918519  | 1.427515  | -14.372015 |
| C | 3.918519  | -1.427515 | -14.372015 |
| C | 3.195540  | -2.679791 | -14.372014 |
| C | 0.722994  | -4.107283 | -14.372013 |
| C | -0.722994 | -4.107283 | -14.372013 |
| C | -3.195539 | -2.679791 | -14.372014 |
| C | -3.918519 | -1.427515 | -14.372015 |
| C | -3.918519 | 1.427515  | -14.372015 |
| C | -3.195539 | 2.679791  | -14.372014 |
| C | 1.427060  | 3.921339  | -13.124745 |
| C | 2.682465  | 3.196554  | -13.124746 |
| C | 4.109498  | 0.724801  | -13.124746 |
| C | 4.109498  | -0.724801 | -13.124746 |
| C | 2.682465  | -3.196554 | -13.124746 |
| C | 1.427060  | -3.921339 | -13.124745 |
| C | -1.427060 | -3.921339 | -13.124745 |
| C | -2.682465 | -3.196554 | -13.124746 |
| C | -4.109498 | -0.724801 | -13.124746 |
| C | -4.109498 | 0.724801  | -13.124746 |
| C | -2.682465 | 3.196554  | -13.124746 |
| C | -1.427060 | 3.921339  | -13.124745 |
| C | 3.194886  | 2.677902  | -11.875237 |
| C | 3.916556  | 1.427892  | -11.875237 |
| C | 3.916556  | -1.427892 | -11.875237 |
| C | 3.194886  | -2.677902 | -11.875237 |
| C | 0.721686  | -4.105771 | -11.875238 |
| C | -0.721685 | -4.105771 | -11.875238 |
| C | -3.194885 | -2.677902 | -11.875237 |
| C | -3.916556 | -1.427892 | -11.875237 |
| C | -3.916556 | 1.427892  | -11.875237 |
| C | -3.194885 | 2.677902  | -11.875237 |
| C | -0.721685 | 4.105771  | -11.875238 |
| C | 0.721685  | 4.105771  | -11.875238 |
| C | 4.107031  | 0.722767  | -10.622369 |
| C | 4.107031  | -0.722768 | -10.622369 |
| C | 2.679469  | -3.195434 | -10.622370 |
| C | 1.427585  | -3.918187 | -10.622370 |
| C | -1.427585 | -3.918186 | -10.622370 |

|   |           |           |            |
|---|-----------|-----------|------------|
| C | -2.679469 | -3.195434 | -10.622370 |
| C | -4.107031 | -0.722768 | -10.622369 |
| C | -4.107031 | 0.722767  | -10.622369 |
| C | -2.679469 | 3.195434  | -10.622370 |
| C | -1.427585 | 3.918186  | -10.622370 |
| C | 1.427585  | 3.918186  | -10.622370 |
| C | 2.679469  | 3.195434  | -10.622370 |
| C | 3.921367  | -1.427051 | -9.374794  |
| C | 3.196560  | -2.682493 | -9.374794  |
| C | 0.724822  | -4.109517 | -9.374794  |
| C | -0.724822 | -4.109517 | -9.374794  |
| C | -3.196560 | -2.682493 | -9.374794  |
| C | -3.921367 | -1.427051 | -9.374794  |
| C | -3.921367 | 1.427051  | -9.374794  |
| C | -3.196560 | 2.682493  | -9.374794  |
| C | -0.724822 | 4.109516  | -9.374794  |
| C | 0.724822  | 4.109516  | -9.374794  |
| C | 3.196560  | 2.682493  | -9.374794  |
| C | 3.921367  | 1.427051  | -9.374794  |
| C | 2.678154  | -3.194963 | -8.125649  |
| C | 1.427834  | -3.916812 | -8.125648  |
| C | -1.427833 | -3.916812 | -8.125648  |
| C | -2.678153 | -3.194963 | -8.125649  |
| C | -4.105965 | -0.721864 | -8.125649  |
| C | -4.105965 | 0.721864  | -8.125649  |
| C | -2.678154 | 3.194963  | -8.125649  |
| C | -1.427833 | 3.916812  | -8.125648  |
| C | 1.427834  | 3.916812  | -8.125648  |
| C | 2.678154  | 3.194963  | -8.125649  |
| C | 4.105966  | 0.721864  | -8.125649  |
| C | 4.105966  | -0.721865 | -8.125649  |
| C | 0.722580  | -4.106788 | -6.872740  |
| C | -0.722580 | -4.106788 | -6.872740  |
| C | -3.195318 | -2.679186 | -6.872741  |
| C | -3.917884 | -1.427626 | -6.872741  |
| C | -3.917884 | 1.427626  | -6.872741  |
| C | -3.195318 | 2.679185  | -6.872741  |
| C | -0.722580 | 4.106788  | -6.872740  |
| C | 0.722580  | 4.106788  | -6.872740  |
| C | 3.195318  | 2.679185  | -6.872741  |
| C | 3.917884  | 1.427626  | -6.872741  |
| C | 3.917884  | -1.427626 | -6.872741  |
| C | 3.195318  | -2.679186 | -6.872741  |
| C | -1.427029 | -3.921398 | -5.624861  |
| C | -2.682531 | -3.196557 | -5.624861  |
| C | -4.109534 | -0.724857 | -5.624861  |
| C | -4.109534 | 0.724856  | -5.624861  |
| C | -2.682531 | 3.196557  | -5.624861  |
| C | -1.427029 | 3.921398  | -5.624861  |
| C | 1.427030  | 3.921398  | -5.624861  |
| C | 2.682531  | 3.196557  | -5.624861  |
| C | 4.109534  | 0.724856  | -5.624861  |
| C | 4.109534  | -0.724857 | -5.624861  |
| C | 2.682531  | -3.196557 | -5.624861  |
| C | 1.427030  | -3.921398 | -5.624861  |
| C | -3.195048 | -2.678423 | -4.376056  |
| C | -3.917088 | -1.427772 | -4.376056  |
| C | -3.917088 | 1.427772  | -4.376056  |
| C | -3.195048 | 2.678423  | -4.376056  |
| C | -0.722055 | 4.106173  | -4.376057  |
| C | 0.722055  | 4.106173  | -4.376057  |
| C | 3.195048  | 2.678423  | -4.376056  |
| C | 3.917088  | 1.427772  | -4.376056  |
| C | 3.917088  | -1.427772 | -4.376056  |
| C | 3.195048  | -2.678423 | -4.376056  |
| C | 0.722055  | -4.106173 | -4.376057  |
| C | -0.722055 | -4.106173 | -4.376057  |
| C | -4.106588 | -0.722410 | -3.123124  |
| C | -4.106588 | 0.722410  | -3.123124  |
| C | -2.678937 | 3.195229  | -3.123125  |

|   |           |           |           |
|---|-----------|-----------|-----------|
| C | -1.427673 | 3.917624  | -3.123125 |
| C | 1.427673  | 3.917624  | -3.123125 |
| C | 2.678937  | 3.195229  | -3.123125 |
| C | 4.106588  | 0.722410  | -3.123124 |
| C | 4.106588  | -0.722410 | -3.123124 |
| C | 2.678937  | -3.195230 | -3.123125 |
| C | 1.427673  | -3.917624 | -3.123125 |
| C | -1.427673 | -3.917624 | -3.123125 |
| C | -2.678937 | -3.195230 | -3.123125 |
| C | -3.921435 | 1.427030  | -1.874949 |
| C | -3.196575 | 2.682562  | -1.874949 |
| C | -0.724874 | 4.109565  | -1.874949 |
| C | 0.724875  | 4.109565  | -1.874949 |
| C | 3.196576  | 2.682562  | -1.874949 |
| C | 3.921435  | 1.427030  | -1.874949 |
| C | 3.921435  | -1.427030 | -1.874949 |
| C | 3.196576  | -2.682562 | -1.874949 |
| C | 0.724875  | -4.109566 | -1.874949 |
| C | -0.724874 | -4.109566 | -1.874949 |
| C | -3.196575 | -2.682562 | -1.874949 |
| C | -3.921435 | -1.427030 | -1.874949 |
| C | -2.678676 | 3.195147  | -0.626470 |
| C | -1.427732 | 3.917357  | -0.626470 |
| C | 1.427732  | 3.917357  | -0.626470 |
| C | 2.678676  | 3.195147  | -0.626470 |
| C | 4.106386  | 0.722225  | -0.626471 |
| C | 4.106386  | -0.722225 | -0.626471 |
| C | 2.678676  | -3.195147 | -0.626470 |
| C | 1.427732  | -3.917357 | -0.626470 |
| C | -1.427732 | -3.917357 | -0.626470 |
| C | -2.678676 | -3.195147 | -0.626470 |
| C | -4.106386 | -0.722225 | -0.626471 |
| C | -4.106386 | 0.722225  | -0.626471 |
| C | -0.722225 | 4.106386  | 0.626470  |
| C | 0.722225  | 4.106386  | 0.626470  |
| C | 3.195147  | 2.678676  | 0.626470  |
| C | 3.917357  | 1.427732  | 0.626470  |
| C | 3.917358  | -1.427732 | 0.626470  |
| C | 3.195147  | -2.678676 | 0.626470  |
| C | 0.722225  | -4.106386 | 0.626470  |
| C | -0.722225 | -4.106386 | 0.626470  |
| C | -3.195147 | -2.678676 | 0.626470  |
| C | -3.917357 | -1.427732 | 0.626470  |
| C | -3.917357 | 1.427732  | 0.626470  |
| C | -3.195147 | 2.678676  | 0.626470  |
| C | 1.427030  | 3.921435  | 1.874949  |
| C | 2.682563  | 3.196576  | 1.874949  |
| C | 4.109566  | 0.724874  | 1.874949  |
| C | 4.109566  | -0.724875 | 1.874949  |
| C | 2.682563  | -3.196576 | 1.874949  |
| C | 1.427030  | -3.921435 | 1.874949  |
| C | -1.427030 | -3.921435 | 1.874949  |
| C | -2.682562 | -3.196576 | 1.874949  |
| C | -4.109565 | -0.724875 | 1.874949  |
| C | -4.109565 | 0.724874  | 1.874949  |
| C | -2.682562 | 3.196576  | 1.874949  |
| C | -1.427030 | 3.921435  | 1.874949  |
| C | 3.195230  | 2.678937  | 3.123125  |
| C | 3.917625  | 1.427673  | 3.123125  |
| C | 3.917625  | -1.427673 | 3.123125  |
| C | 3.195230  | -2.678937 | 3.123125  |
| C | 0.722410  | -4.106588 | 3.123124  |
| C | -0.722409 | -4.106588 | 3.123124  |
| C | -3.195229 | -2.678937 | 3.123125  |
| C | -3.917624 | -1.427673 | 3.123125  |
| C | -3.917624 | 1.427673  | 3.123125  |
| C | -3.195229 | 2.678937  | 3.123125  |
| C | -0.722409 | 4.106588  | 3.123124  |
| C | 0.722410  | 4.106588  | 3.123124  |
| C | 4.106173  | 0.722055  | 4.376057  |

|   |           |           |           |
|---|-----------|-----------|-----------|
| C | 4.106173  | -0.722055 | 4.376057  |
| C | 2.678423  | -3.195048 | 4.376056  |
| C | 1.427773  | -3.917088 | 4.376056  |
| C | -1.427772 | -3.917088 | 4.376056  |
| C | -2.678422 | -3.195048 | 4.376056  |
| C | -4.106173 | -0.722055 | 4.376057  |
| C | -4.106173 | 0.722055  | 4.376057  |
| C | -2.678422 | 3.195048  | 4.376056  |
| C | -1.427772 | 3.917088  | 4.376056  |
| C | 1.427773  | 3.917088  | 4.376056  |
| C | 2.678423  | 3.195048  | 4.376056  |
| C | 3.921398  | -1.427030 | 5.624861  |
| C | 3.196557  | -2.682531 | 5.624861  |
| C | 0.724857  | -4.109534 | 5.624861  |
| C | -0.724856 | -4.109534 | 5.624861  |
| C | -3.196557 | -2.682531 | 5.624861  |
| C | -3.921398 | -1.427030 | 5.624861  |
| C | -3.921398 | 1.427030  | 5.624861  |
| C | -3.196557 | 2.682531  | 5.624861  |
| C | -0.724856 | 4.109534  | 5.624861  |
| C | 0.724857  | 4.109534  | 5.624861  |
| C | 3.196557  | 2.682531  | 5.624861  |
| C | 3.921398  | 1.427030  | 5.624861  |
| C | 2.679186  | -3.195318 | 6.872741  |
| C | 1.427626  | -3.917884 | 6.872741  |
| C | -1.427626 | -3.917884 | 6.872741  |
| C | -2.679185 | -3.195318 | 6.872741  |
| C | -4.106788 | -0.722580 | 6.872740  |
| C | -4.106788 | 0.722580  | 6.872740  |
| C | -2.679185 | 3.195318  | 6.872741  |
| C | -1.427626 | 3.917884  | 6.872741  |
| C | 1.427626  | 3.917884  | 6.872741  |
| C | 2.679186  | 3.195318  | 6.872741  |
| C | 4.106788  | 0.722580  | 6.872740  |
| C | 4.106788  | -0.722580 | 6.872740  |
| C | 0.721865  | -4.105965 | 8.125649  |
| C | -0.721864 | -4.105965 | 8.125649  |
| C | -3.194963 | -2.678154 | 8.125648  |
| C | -3.916812 | -1.427833 | 8.125648  |
| C | -3.916812 | 1.427833  | 8.125648  |
| C | -3.194963 | 2.678154  | 8.125648  |
| C | -0.721864 | 4.105965  | 8.125649  |
| C | 0.721865  | 4.105965  | 8.125649  |
| C | 3.194963  | 2.678154  | 8.125648  |
| C | 3.916813  | 1.427833  | 8.125648  |
| C | 3.916813  | -1.427833 | 8.125648  |
| C | 3.194963  | -2.678154 | 8.125649  |
| C | -1.427051 | -3.921367 | 9.374794  |
| C | -2.682493 | -3.196560 | 9.374794  |
| C | -4.109516 | -0.724822 | 9.374794  |
| C | -4.109516 | 0.724822  | 9.374794  |
| C | -2.682493 | 3.196560  | 9.374794  |
| C | -1.427051 | 3.921367  | 9.374794  |
| C | 1.427052  | 3.921367  | 9.374794  |
| C | 2.682493  | 3.196560  | 9.374794  |
| C | 4.109517  | 0.724822  | 9.374794  |
| C | 4.109517  | -0.724822 | 9.374794  |
| C | 2.682493  | -3.196560 | 9.374794  |
| C | 1.427052  | -3.921367 | 9.374794  |
| C | -3.195434 | -2.679469 | 10.622370 |
| C | -3.918186 | -1.427585 | 10.622370 |
| C | -3.918186 | 1.427585  | 10.622370 |
| C | -3.195434 | 2.679469  | 10.622370 |
| C | -0.722767 | 4.107031  | 10.622369 |
| C | 0.722768  | 4.107031  | 10.622369 |
| C | 3.195434  | 2.679469  | 10.622370 |
| C | 3.918187  | 1.427585  | 10.622370 |
| C | 3.918187  | -1.427585 | 10.622370 |
| C | 3.195434  | -2.679469 | 10.622370 |
| C | 0.722768  | -4.107031 | 10.622369 |

|   |           |           |           |
|---|-----------|-----------|-----------|
| C | -0.722767 | -4.107031 | 10.622369 |
| C | -4.105771 | -0.721685 | 11.875238 |
| C | -4.105771 | 0.721685  | 11.875238 |
| C | -2.677902 | 3.194885  | 11.875237 |
| C | -1.427892 | 3.916556  | 11.875237 |
| C | 1.427892  | 3.916556  | 11.875237 |
| C | 2.677902  | 3.194885  | 11.875237 |
| C | 4.105772  | 0.721685  | 11.875238 |
| C | 4.105772  | -0.721685 | 11.875238 |
| C | 2.677902  | -3.194886 | 11.875237 |
| C | 1.427892  | -3.916556 | 11.875237 |
| C | -1.427892 | -3.916556 | 11.875237 |
| C | -2.677902 | -3.194886 | 11.875237 |
| C | -3.921339 | 1.427060  | 13.124745 |
| C | -3.196554 | 2.682465  | 13.124746 |
| C | -0.724801 | 4.109498  | 13.124746 |
| C | 0.724801  | 4.109498  | 13.124746 |
| C | 3.196554  | 2.682465  | 13.124746 |
| C | 3.921340  | 1.427060  | 13.124745 |
| C | 3.921340  | -1.427060 | 13.124745 |
| C | 3.196554  | -2.682465 | 13.124746 |
| C | 0.724801  | -4.109498 | 13.124746 |
| C | -0.724801 | -4.109498 | 13.124746 |
| C | -3.196554 | -2.682465 | 13.124746 |
| C | -3.921339 | -1.427060 | 13.124745 |
| C | -2.679791 | 3.195539  | 14.372014 |
| C | -1.427515 | 3.918519  | 14.372015 |
| C | 1.427515  | 3.918519  | 14.372015 |
| C | 2.679791  | 3.195539  | 14.372014 |
| C | 4.107283  | 0.722994  | 14.372013 |
| C | 4.107283  | -0.722994 | 14.372013 |
| C | 2.679791  | -3.195539 | 14.372014 |
| C | 1.427515  | -3.918519 | 14.372015 |
| C | -1.427515 | -3.918519 | 14.372015 |
| C | -2.679791 | -3.195539 | 14.372014 |
| C | -4.107283 | -0.722994 | 14.372013 |
| C | -4.107283 | 0.722994  | 14.372013 |
| C | -0.721527 | 4.105559  | 15.624828 |
| C | 0.721527  | 4.105559  | 15.624828 |
| C | 3.194780  | 2.677658  | 15.624827 |
| C | 3.916292  | 1.427922  | 15.624827 |
| C | 3.916292  | -1.427922 | 15.624827 |
| C | 3.194780  | -2.677658 | 15.624827 |
| C | 0.721527  | -4.105559 | 15.624828 |
| C | -0.721527 | -4.105559 | 15.624828 |
| C | -3.194780 | -2.677658 | 15.624827 |
| C | -3.916292 | -1.427922 | 15.624826 |
| C | -3.916292 | 1.427922  | 15.624826 |
| C | -3.194780 | 2.677658  | 15.624827 |
| C | 1.427048  | 3.921288  | 16.874720 |
| C | 2.682426  | 3.196517  | 16.874720 |
| C | 4.109447  | 0.724785  | 16.874720 |
| C | 4.109447  | -0.724785 | 16.874720 |
| C | 2.682426  | -3.196517 | 16.874720 |
| C | 1.427048  | -3.921288 | 16.874720 |
| C | -1.427048 | -3.921288 | 16.874720 |
| C | -2.682426 | -3.196517 | 16.874720 |
| C | -4.109447 | -0.724785 | 16.874720 |
| C | -4.109447 | 0.724785  | 16.874720 |
| C | -2.682426 | 3.196517  | 16.874720 |
| C | -1.427048 | 3.921288  | 16.874720 |
| C | 3.195624  | 2.680113  | 18.121671 |
| C | 3.918840  | 1.427428  | 18.121671 |
| C | 3.918840  | -1.427428 | 18.121671 |
| C | 3.195624  | -2.680113 | 18.121671 |
| C | 0.723230  | -4.107517 | 18.121670 |
| C | -0.723230 | -4.107517 | 18.121670 |
| C | -3.195624 | -2.680113 | 18.121671 |
| C | -3.918840 | -1.427428 | 18.121671 |
| C | -3.918840 | 1.427428  | 18.121671 |

|   |           |           |           |
|---|-----------|-----------|-----------|
| C | -3.195624 | 2.680113  | 18.121671 |
| C | -0.723230 | 4.107517  | 18.121670 |
| C | 0.723230  | 4.107517  | 18.121670 |
| C | 4.105312  | 0.721342  | 19.374419 |
| C | 4.105312  | -0.721342 | 19.374419 |
| C | 2.677374  | -3.194657 | 19.374419 |
| C | 1.427958  | -3.915984 | 19.374420 |
| C | -1.427958 | -3.915984 | 19.374420 |
| C | -2.677373 | -3.194657 | 19.374419 |
| C | -4.105312 | -0.721342 | 19.374419 |
| C | -4.105312 | 0.721342  | 19.374419 |
| C | -2.677373 | 3.194657  | 19.374419 |
| C | -1.427958 | 3.915984  | 19.374420 |
| C | 1.427958  | 3.915984  | 19.374420 |
| C | 2.677374  | 3.194657  | 19.374419 |
| C | 3.921213  | -1.427058 | 20.624727 |
| C | 3.196488  | -2.682354 | 20.624728 |
| C | 0.724739  | -4.109383 | 20.624729 |
| C | -0.724738 | -4.109383 | 20.624729 |
| C | -3.196488 | -2.682354 | 20.624728 |
| C | -3.921213 | -1.427058 | 20.624727 |
| C | -3.921213 | 1.427058  | 20.624727 |
| C | -3.196488 | 2.682354  | 20.624728 |
| C | -0.724738 | 4.109383  | 20.624729 |
| C | 0.724739  | 4.109383  | 20.624729 |
| C | 3.196488  | 2.682354  | 20.624728 |
| C | 3.921213  | 1.427058  | 20.624727 |
| C | 2.680438  | -3.195736 | 21.871330 |
| C | 1.427365  | -3.919174 | 21.871331 |
| C | -1.427365 | -3.919174 | 21.871331 |
| C | -2.680438 | -3.195736 | 21.871330 |
| C | -4.107780 | -0.723454 | 21.871328 |
| C | -4.107780 | 0.723454  | 21.871328 |
| C | -2.680438 | 3.195736  | 21.871330 |
| C | -1.427365 | 3.919174  | 21.871331 |
| C | 1.427365  | 3.919174  | 21.871331 |
| C | 2.680438  | 3.195736  | 21.871330 |
| C | 4.107780  | 0.723454  | 21.871328 |
| C | 4.107780  | -0.723454 | 21.871328 |
| C | 0.721089  | -4.105037 | 23.124005 |
| C | -0.721089 | -4.105037 | 23.124005 |
| C | -3.194553 | -2.677018 | 23.124003 |
| C | -3.915629 | -1.428043 | 23.124002 |
| C | -3.915629 | 1.428043  | 23.124002 |
| C | -3.194553 | 2.677018  | 23.124003 |
| C | -0.721089 | 4.105037  | 23.124005 |
| C | 0.721089  | 4.105037  | 23.124005 |
| C | 3.194553  | 2.677018  | 23.124003 |
| C | 3.915629  | 1.428043  | 23.124002 |
| C | 3.915629  | -1.428043 | 23.124002 |
| C | 3.194553  | -2.677018 | 23.124003 |
| C | -1.427095 | -3.921137 | 24.374800 |
| C | -2.682278 | -3.196483 | 24.374799 |
| C | -4.109350 | -0.724672 | 24.374798 |
| C | -4.109350 | 0.724672  | 24.374798 |
| C | -2.682278 | 3.196483  | 24.374799 |
| C | -1.427095 | 3.921137  | 24.374800 |
| C | 1.427095  | 3.921137  | 24.374800 |
| C | 2.682278  | 3.196483  | 24.374799 |
| C | 4.109350  | 0.724672  | 24.374799 |
| C | 4.109350  | -0.724672 | 24.374799 |
| C | 2.682278  | -3.196483 | 24.374799 |
| C | 1.427095  | -3.921137 | 24.374800 |
| C | -3.195917 | -2.680857 | 25.620990 |
| C | -3.919636 | -1.427306 | 25.620989 |
| C | -3.919636 | 1.427306  | 25.620989 |
| C | -3.195917 | 2.680857  | 25.620990 |
| C | -0.723731 | 4.108132  | 25.620990 |
| C | 0.723731  | 4.108132  | 25.620990 |
| C | 3.195917  | 2.680857  | 25.620990 |

|   |           |           |           |
|---|-----------|-----------|-----------|
| C | 3.919636  | 1.427306  | 25.620989 |
| C | 3.919636  | -1.427306 | 25.620989 |
| C | 3.195917  | -2.680857 | 25.620990 |
| C | 0.723731  | -4.108132 | 25.620990 |
| C | -0.723731 | -4.108132 | 25.620990 |
| C | -4.104740 | -0.720816 | 26.873564 |
| C | -4.104740 | 0.720816  | 26.873564 |
| C | -2.676630 | 3.194413  | 26.873566 |
| C | -1.428123 | 3.915210  | 26.873567 |
| C | 1.428123  | 3.915210  | 26.873567 |
| C | 2.676630  | 3.194413  | 26.873566 |
| C | 4.104740  | 0.720816  | 26.873564 |
| C | 4.104740  | -0.720816 | 26.873564 |
| C | 2.676630  | -3.194413 | 26.873566 |
| C | 1.428123  | -3.915210 | 26.873567 |
| C | -1.428123 | -3.915210 | 26.873567 |
| C | -2.676630 | -3.194413 | 26.873566 |
| C | -3.921069 | 1.427110  | 28.124968 |
| C | -3.196463 | 2.682191  | 28.124970 |
| C | -0.724615 | 4.109265  | 28.124973 |
| C | 0.724615  | 4.109265  | 28.124973 |
| C | 3.196463  | 2.682191  | 28.124970 |
| C | 3.921069  | 1.427110  | 28.124968 |
| C | 3.921069  | -1.427110 | 28.124968 |
| C | 3.196463  | -2.682191 | 28.124970 |
| C | 0.724615  | -4.109265 | 28.124973 |
| C | -0.724615 | -4.109265 | 28.124973 |
| C | -3.196463 | -2.682191 | 28.124970 |
| C | -3.921069 | -1.427110 | 28.124968 |
| C | -2.681405 | 3.196023  | 29.370660 |
| C | -1.427138 | 3.920142  | 29.370661 |
| C | 1.427138  | 3.920142  | 29.370662 |
| C | 2.681405  | 3.196023  | 29.370660 |
| C | 4.108529  | 0.724141  | 29.370657 |
| C | 4.108529  | -0.724141 | 29.370657 |
| C | 2.681405  | -3.196023 | 29.370660 |
| C | 1.427138  | -3.920142 | 29.370662 |
| C | -1.427138 | -3.920142 | 29.370662 |
| C | -2.681405 | -3.196023 | 29.370660 |
| C | -4.108529 | -0.724141 | 29.370656 |
| C | -4.108529 | 0.724141  | 29.370656 |
| C | -0.720467 | 4.104304  | 30.623122 |
| C | 0.720467  | 4.104304  | 30.623122 |
| C | 3.194251  | 2.676117  | 30.623119 |
| C | 3.914712  | 1.428221  | 30.623118 |
| C | 3.914712  | -1.428221 | 30.623118 |
| C | 3.194251  | -2.676117 | 30.623119 |
| C | 0.720467  | -4.104304 | 30.623122 |
| C | -0.720467 | -4.104304 | 30.623122 |
| C | -3.194251 | -2.676117 | 30.623119 |
| C | -3.914712 | -1.428221 | 30.623118 |
| C | -3.914712 | 1.428221  | 30.623118 |
| C | -3.194251 | 2.676117  | 30.623119 |
| C | 1.427148  | 3.921218  | 31.875417 |
| C | 2.682341  | 3.196567  | 31.875417 |
| C | 4.109479  | 0.724676  | 31.875416 |
| C | 4.109479  | -0.724676 | 31.875416 |
| C | 2.682341  | -3.196567 | 31.875417 |
| C | 1.427148  | -3.921218 | 31.875417 |
| C | -1.427148 | -3.921218 | 31.875417 |
| C | -2.682341 | -3.196567 | 31.875417 |
| C | -4.109479 | -0.724676 | 31.875416 |
| C | -4.109479 | 0.724676  | 31.875416 |
| C | -2.682341 | 3.196567  | 31.875417 |
| C | -1.427148 | 3.921218  | 31.875417 |
| C | 3.196797  | 2.682586  | 33.120248 |
| C | 3.921591  | 1.427193  | 33.120248 |
| C | 3.921591  | -1.427193 | 33.120249 |
| C | 3.196797  | -2.682586 | 33.120248 |
| C | 0.724798  | -4.109732 | 33.120248 |

|   |           |           |           |
|---|-----------|-----------|-----------|
| C | -0.724798 | -4.109732 | 33.120248 |
| C | -3.196797 | -2.682586 | 33.120248 |
| C | -3.921591 | -1.427193 | 33.120248 |
| C | -3.921591 | 1.427193  | 33.120248 |
| C | -3.196797 | 2.682586  | 33.120248 |
| C | -0.724798 | 4.109732  | 33.120248 |
| C | 0.724798  | 4.109732  | 33.120248 |
| C | 4.104094  | 0.719670  | 34.372325 |
| C | 4.104094  | -0.719670 | 34.372325 |
| C | 2.675309  | -3.194396 | 34.372324 |
| C | 1.428781  | -3.914039 | 34.372324 |
| C | -1.428781 | -3.914039 | 34.372324 |
| C | -2.675309 | -3.194396 | 34.372324 |
| C | -4.104094 | -0.719670 | 34.372324 |
| C | -4.104094 | 0.719670  | 34.372324 |
| C | -2.675309 | 3.194396  | 34.372324 |
| C | -1.428781 | 3.914039  | 34.372324 |
| C | 1.428781  | 3.914039  | 34.372324 |
| C | 2.675309  | 3.194396  | 34.372324 |
| C | 3.920270  | -1.426790 | 35.626332 |
| C | 3.195787  | -2.681633 | 35.626329 |
| C | 0.724482  | -4.108374 | 35.626331 |
| C | -0.724482 | -4.108374 | 35.626331 |
| C | -3.195788 | -2.681633 | 35.626329 |
| C | -3.920271 | -1.426790 | 35.626332 |
| C | -3.920271 | 1.426790  | 35.626332 |
| C | -3.195788 | 2.681633  | 35.626329 |
| C | -0.724482 | 4.108374  | 35.626331 |
| C | 0.724482  | 4.108374  | 35.626331 |
| C | 3.195787  | 2.681633  | 35.626329 |
| C | 3.920270  | 1.426790  | 35.626332 |
| C | 2.680801  | -3.192700 | 36.869395 |
| C | 1.424582  | -3.917940 | 36.869394 |
| C | -1.424582 | -3.917940 | 36.869394 |
| C | -2.680801 | -3.192700 | 36.869395 |
| C | -4.105388 | -0.725267 | 36.869399 |
| C | -4.105388 | 0.725267  | 36.869399 |
| C | -2.680801 | 3.192700  | 36.869395 |
| C | -1.424582 | 3.917940  | 36.869394 |
| C | 1.424582  | 3.917940  | 36.869394 |
| C | 2.680801  | 3.192700  | 36.869395 |
| C | 4.105387  | 0.725267  | 36.869399 |
| C | 4.105387  | -0.725267 | 36.869399 |
| C | 0.715828  | -4.088317 | 38.121097 |
| C | -0.715828 | -4.088317 | 38.121097 |
| C | -3.182745 | -2.664102 | 38.121101 |
| C | -3.898585 | -1.424246 | 38.121112 |
| C | -3.898585 | 1.424247  | 38.121112 |
| C | -3.182745 | 2.664102  | 38.121101 |
| C | -0.715828 | 4.088317  | 38.121097 |
| C | 0.715828  | 4.088317  | 38.121097 |
| C | 3.182744  | 2.664102  | 38.121101 |
| C | 3.898585  | 1.424247  | 38.121112 |
| C | 3.898585  | -1.424246 | 38.121112 |
| C | 3.182744  | -2.664102 | 38.121101 |
| C | -1.420565 | -3.911736 | 39.383308 |
| C | -2.677426 | -3.186134 | 39.383305 |
| C | -4.097999 | -0.725635 | 39.383336 |
| C | -4.097999 | 0.725635  | 39.383336 |
| C | -2.677426 | 3.186134  | 39.383305 |
| C | -1.420565 | 3.911736  | 39.383308 |
| C | 1.420565  | 3.911736  | 39.383308 |
| C | 2.677425  | 3.186134  | 39.383305 |
| C | 4.097999  | 0.725635  | 39.383336 |
| C | 4.097999  | -0.725635 | 39.383336 |
| C | 2.677425  | -3.186134 | 39.383305 |
| C | 1.420565  | -3.911736 | 39.383308 |
| C | -3.225647 | -2.712438 | 40.623359 |
| C | -3.961809 | -1.437268 | 40.623385 |
| C | -3.961809 | 1.437268  | 40.623385 |



|   |           |           |            |
|---|-----------|-----------|------------|
| C | -3.225647 | 2.712438  | 40.623359  |
| C | -0.736202 | 4.149629  | 40.623358  |
| C | 0.736202  | 4.149629  | 40.623358  |
| C | 3.225646  | 2.712438  | 40.623359  |
| C | 3.961809  | 1.437268  | 40.623385  |
| C | 3.961809  | -1.437268 | 40.623385  |
| C | 3.225646  | -2.712438 | 40.623359  |
| C | 0.736202  | -4.149629 | 40.623358  |
| C | -0.736202 | -4.149629 | 40.623358  |
| C | -4.213385 | -0.692805 | 41.837207  |
| C | -4.213385 | 0.692806  | 41.837207  |
| C | -2.706788 | 3.302688  | 41.837150  |
| C | -1.506796 | 3.995464  | 41.837152  |
| C | 1.506795  | 3.995464  | 41.837152  |
| C | 2.706787  | 3.302688  | 41.837150  |
| C | 4.213384  | 0.692805  | 41.837207  |
| C | 4.213384  | -0.692805 | 41.837207  |
| C | 2.706787  | -3.302688 | 41.837150  |
| C | 1.506795  | -3.995464 | 41.837152  |
| C | -1.506796 | -3.995464 | 41.837152  |
| C | -2.706788 | -3.302688 | 41.837150  |
| H | 3.087906  | 3.199156  | -42.794353 |
| H | 4.314476  | 1.074608  | -42.794355 |
| H | 4.314476  | -1.074608 | -42.794355 |
| H | 3.087906  | -3.199156 | -42.794353 |
| H | 1.226597  | -4.273403 | -42.794419 |
| H | -1.226598 | -4.273403 | -42.794419 |
| H | -3.087906 | -3.199156 | -42.794353 |
| H | -4.314477 | -1.074608 | -42.794355 |
| H | -4.314477 | 1.074608  | -42.794355 |
| H | -3.087906 | 3.199156  | -42.794353 |
| H | -1.226598 | 4.273404  | -42.794419 |
| H | 1.226597  | 4.273404  | -42.794419 |
| H | -4.273404 | -1.226597 | 42.794419  |
| H | -4.273404 | 1.226598  | 42.794419  |
| H | -3.199156 | 3.087906  | 42.794353  |
| H | -1.074608 | 4.314477  | 42.794355  |
| H | 1.074607  | 4.314477  | 42.794355  |
| H | 3.199155  | 3.087906  | 42.794353  |
| H | 4.273403  | 1.226598  | 42.794420  |
| H | 4.273403  | -1.226597 | 42.794420  |
| H | 3.199155  | -3.087906 | 42.794353  |
| H | 1.074607  | -4.314477 | 42.794355  |
| H | -1.074608 | -4.314477 | 42.794355  |
| H | -3.199156 | -3.087906 | 42.794353  |

Nanotube (6,6) u34v6s  
B3LYP/STO-3G Energy: -31186.517206

|   |           |           |           |
|---|-----------|-----------|-----------|
| 6 | -3.260861 | 2.662287  | 41.863775 |
| 6 | -3.936039 | 1.492845  | 41.863775 |
| 6 | -3.936039 | -1.492845 | 41.863775 |
| 6 | -3.260861 | -2.662287 | 41.863775 |
| 6 | -0.675178 | -4.155133 | 41.863775 |
| 6 | 0.675178  | -4.155133 | 41.863775 |
| 6 | 3.260861  | -2.662287 | 41.863775 |
| 6 | 3.936039  | -1.492845 | 41.863775 |
| 6 | 3.936039  | 1.492845  | 41.863775 |
| 6 | 3.260861  | 2.662287  | 41.863775 |
| 6 | 0.675178  | 4.155133  | 41.863775 |
| 6 | -0.675178 | 4.155133  | 41.863775 |
| 6 | -4.096429 | 0.730866  | 40.654425 |
| 6 | -4.096429 | -0.730866 | 40.654425 |
| 6 | -2.681163 | -3.182179 | 40.654425 |
| 6 | -1.415266 | -3.913045 | 40.654425 |
| 6 | 1.415266  | -3.913045 | 40.654425 |
| 6 | 2.681163  | -3.182179 | 40.654425 |
| 6 | 4.096429  | -0.730866 | 40.654425 |

|   |           |           |           |
|---|-----------|-----------|-----------|
| 6 | 4.096429  | 0.730866  | 40.654425 |
| 6 | 2.681163  | 3.182179  | 40.654425 |
| 6 | 1.415266  | 3.913045  | 40.654425 |
| 6 | -1.415266 | 3.913045  | 40.654425 |
| 6 | -2.681163 | 3.182179  | 40.654425 |
| 6 | -3.863541 | -1.399082 | 39.452458 |
| 6 | -3.143411 | -2.646384 | 39.452458 |
| 6 | -0.720130 | -4.045465 | 39.452458 |
| 6 | 0.720130  | -4.045465 | 39.452458 |
| 6 | 3.143411  | -2.646384 | 39.452458 |
| 6 | 3.863541  | -1.399082 | 39.452458 |
| 6 | 3.863541  | 1.399082  | 39.452458 |
| 6 | 3.143411  | 2.646384  | 39.452458 |
| 6 | 0.720130  | 4.045465  | 39.452458 |
| 6 | -0.720130 | 4.045465  | 39.452458 |
| 6 | -3.143411 | 2.646384  | 39.452458 |
| 6 | -3.863541 | 1.399082  | 39.452458 |
| 6 | -2.609775 | -3.131490 | 38.197617 |
| 6 | -1.407062 | -3.825876 | 38.197617 |
| 6 | 1.407062  | -3.825876 | 38.197617 |
| 6 | 2.609775  | -3.131490 | 38.197617 |
| 6 | 4.016837  | -0.694387 | 38.197617 |
| 6 | 4.016837  | 0.694387  | 38.197617 |
| 6 | 2.609775  | 3.131490  | 38.197617 |
| 6 | 1.407062  | 3.825876  | 38.197617 |
| 6 | -1.407062 | 3.825876  | 38.197617 |
| 6 | -2.609775 | 3.131490  | 38.197617 |
| 6 | -4.016837 | 0.694387  | 38.197617 |
| 6 | -4.016837 | -0.694387 | 38.197617 |
| 6 | -0.718946 | -4.048804 | 36.954361 |
| 6 | 0.718946  | -4.048804 | 36.954361 |
| 6 | 3.146894  | -2.647028 | 36.954361 |
| 6 | 3.865840  | -1.401776 | 36.954361 |
| 6 | 3.865840  | 1.401776  | 36.954361 |
| 6 | 3.146894  | 2.647028  | 36.954361 |
| 6 | 0.718946  | 4.048804  | 36.954361 |
| 6 | -0.718946 | 4.048804  | 36.954361 |
| 6 | -3.146894 | 2.647028  | 36.954361 |
| 6 | -3.865840 | 1.401776  | 36.954361 |
| 6 | -3.865840 | -1.401776 | 36.954361 |
| 6 | -3.146894 | -2.647028 | 36.954361 |
| 6 | 1.403696  | -3.869753 | 35.747216 |
| 6 | 2.649457  | -3.150513 | 35.747216 |
| 6 | 4.053152  | -0.719240 | 35.747216 |
| 6 | 4.053152  | 0.719240  | 35.747216 |
| 6 | 2.649457  | 3.150513  | 35.747216 |
| 6 | 1.403696  | 3.869753  | 35.747216 |
| 6 | -1.403696 | 3.869753  | 35.747216 |
| 6 | -2.649457 | 3.150513  | 35.747216 |
| 6 | -4.053152 | 0.719240  | 35.747216 |
| 6 | -4.053152 | -0.719240 | 35.747216 |
| 6 | -2.649457 | -3.150513 | 35.747216 |
| 6 | -1.403696 | -3.869753 | 35.747216 |
| 6 | 3.143780  | -2.621527 | 34.503279 |
| 6 | 3.842199  | -1.411830 | 34.503279 |
| 6 | 3.842199  | 1.411830  | 34.503279 |
| 6 | 3.143780  | 2.621527  | 34.503279 |
| 6 | 0.698419  | 4.033357  | 34.503279 |
| 6 | -0.698419 | 4.033357  | 34.503279 |
| 6 | -3.143780 | 2.621527  | 34.503279 |
| 6 | -3.842199 | 1.411830  | 34.503279 |
| 6 | -3.842199 | -1.411830 | 34.503279 |
| 6 | -3.143780 | -2.621527 | 34.503279 |
| 6 | -0.698419 | -4.033357 | 34.503279 |
| 6 | 0.698419  | -4.033357 | 34.503279 |
| 6 | 4.052181  | -0.717165 | 33.258071 |
| 6 | 4.052181  | 0.717165  | 33.258071 |
| 6 | 2.647174  | 3.150709  | 33.258071 |
| 6 | 1.405007  | 3.867874  | 33.258071 |
| 6 | -1.405007 | 3.867874  | 33.258071 |

|   |           |           |           |
|---|-----------|-----------|-----------|
| 6 | -2.647174 | 3.150709  | 33.258071 |
| 6 | -4.052181 | 0.717165  | 33.258071 |
| 6 | -4.052181 | -0.717165 | 33.258071 |
| 6 | -2.647174 | -3.150709 | 33.258071 |
| 6 | -1.405007 | -3.867874 | 33.258071 |
| 6 | 1.405007  | -3.867874 | 33.258071 |
| 6 | 2.647174  | -3.150709 | 33.258071 |
| 6 | 3.872160  | 1.403678  | 32.048420 |
| 6 | 3.151701  | 2.651550  | 32.048420 |
| 6 | 0.720460  | 4.055228  | 32.048420 |
| 6 | -0.720460 | 4.055228  | 32.048420 |
| 6 | -3.151701 | 2.651550  | 32.048420 |
| 6 | -3.872160 | 1.403678  | 32.048420 |
| 6 | -3.872160 | -1.403678 | 32.048420 |
| 6 | -3.151701 | -2.651550 | 32.048420 |
| 6 | -0.720460 | -4.055228 | 32.048420 |
| 6 | 0.720460  | -4.055228 | 32.048420 |
| 6 | 3.151701  | -2.651550 | 32.048420 |
| 6 | 3.872160  | -1.403678 | 32.048420 |
| 6 | 2.622364  | 3.143175  | 30.809018 |
| 6 | 1.410887  | 3.842621  | 30.809018 |
| 6 | -1.410887 | 3.842621  | 30.809018 |
| 6 | -2.622364 | 3.143175  | 30.809018 |
| 6 | -4.033251 | 0.699446  | 30.809018 |
| 6 | -4.033251 | -0.699446 | 30.809018 |
| 6 | -2.622364 | -3.143175 | 30.809018 |
| 6 | -1.410887 | -3.842621 | 30.809018 |
| 6 | 1.410887  | -3.842621 | 30.809018 |
| 6 | 2.622364  | -3.143175 | 30.809018 |
| 6 | 4.033251  | -0.699446 | 30.809018 |
| 6 | 4.033251  | 0.699446  | 30.809018 |
| 6 | 0.714491  | 4.048583  | 29.561436 |
| 6 | -0.714491 | 4.048583  | 29.561436 |
| 6 | -3.148931 | 2.643059  | 29.561436 |
| 6 | -3.863421 | 1.405525  | 29.561436 |
| 6 | -3.863421 | -1.405525 | 29.561436 |
| 6 | -3.148931 | -2.643059 | 29.561436 |
| 6 | -0.714491 | -4.048583 | 29.561436 |
| 6 | 0.714491  | -4.048583 | 29.561436 |
| 6 | 3.148931  | -2.643059 | 29.561436 |
| 6 | 3.863421  | -1.405525 | 29.561436 |
| 6 | 3.863421  | 1.405525  | 29.561436 |
| 6 | 3.148931  | 2.643059  | 29.561436 |
| 6 | -1.403121 | 3.873337  | 28.349606 |
| 6 | -2.652848 | 3.151807  | 28.349606 |
| 6 | -4.055968 | 0.721530  | 28.349606 |
| 6 | -4.055968 | -0.721530 | 28.349606 |
| 6 | -2.652848 | -3.151807 | 28.349606 |
| 6 | -1.403121 | -3.873337 | 28.349606 |
| 6 | 1.403121  | -3.873337 | 28.349606 |
| 6 | 2.652848  | -3.151807 | 28.349606 |
| 6 | 4.055968  | -0.721530 | 28.349606 |
| 6 | 4.055968  | 0.721530  | 28.349606 |
| 6 | 2.652848  | 3.151807  | 28.349606 |
| 6 | 1.403121  | 3.873337  | 28.349606 |
| 6 | -3.143343 | 2.623743  | 27.114564 |
| 6 | -3.843900 | 1.410343  | 27.114564 |
| 6 | -3.843900 | -1.410343 | 27.114564 |
| 6 | -3.143343 | -2.623743 | 27.114564 |
| 6 | -0.700557 | -4.034086 | 27.114564 |
| 6 | 0.700557  | -4.034086 | 27.114564 |
| 6 | 3.143343  | -2.623743 | 27.114564 |
| 6 | 3.843900  | -1.410343 | 27.114564 |
| 6 | 3.843900  | 1.410343  | 27.114564 |
| 6 | 3.143343  | 2.623743  | 27.114564 |
| 6 | 0.700557  | 4.034086  | 27.114564 |
| 6 | -0.700557 | 4.034086  | 27.114564 |
| 6 | -4.045435 | 0.711638  | 25.864932 |
| 6 | -4.045435 | -0.711638 | 25.864932 |
| 6 | -2.639014 | -3.147630 | 25.864932 |

|   |           |           |           |
|---|-----------|-----------|-----------|
| 6 | -1.406420 | -3.859269 | 25.864932 |
| 6 | 1.406420  | -3.859269 | 25.864932 |
| 6 | 2.639014  | -3.147630 | 25.864932 |
| 6 | 4.045435  | -0.711638 | 25.864932 |
| 6 | 4.045435  | 0.711638  | 25.864932 |
| 6 | 2.639014  | 3.147630  | 25.864932 |
| 6 | 1.406420  | 3.859269  | 25.864932 |
| 6 | -1.406420 | 3.859269  | 25.864932 |
| 6 | -2.639014 | 3.147630  | 25.864932 |
| 6 | -3.874587 | -1.402695 | 24.650239 |
| 6 | -3.152063 | -2.654143 | 24.650239 |
| 6 | -0.722523 | -4.056838 | 24.650239 |
| 6 | 0.722523  | -4.056838 | 24.650239 |
| 6 | 3.152063  | -2.654143 | 24.650239 |
| 6 | 3.874587  | -1.402695 | 24.650239 |
| 6 | 3.874587  | 1.402695  | 24.650239 |
| 6 | 3.152063  | 2.654143  | 24.650239 |
| 6 | 0.722523  | 4.056838  | 24.650239 |
| 6 | -0.722523 | 4.056838  | 24.650239 |
| 6 | -3.152063 | 2.654143  | 24.650239 |
| 6 | -3.874587 | 1.402695  | 24.650239 |
| 6 | -2.625874 | -3.143758 | 23.419967 |
| 6 | -1.409638 | -3.845953 | 23.419967 |
| 6 | 1.409638  | -3.845953 | 23.419967 |
| 6 | 2.625874  | -3.143758 | 23.419967 |
| 6 | 4.035511  | -0.702194 | 23.419967 |
| 6 | 4.035511  | 0.702194  | 23.419967 |
| 6 | 2.625874  | 3.143758  | 23.419967 |
| 6 | 1.409638  | 3.845953  | 23.419967 |
| 6 | -1.409638 | 3.845953  | 23.419967 |
| 6 | -2.625874 | 3.143758  | 23.419967 |
| 6 | -4.035511 | 0.702194  | 23.419967 |
| 6 | -4.035511 | -0.702194 | 23.419967 |
| 6 | -0.708527 | -4.041984 | 22.168794 |
| 6 | 0.708527  | -4.041984 | 22.168794 |
| 6 | 3.146197  | -2.634595 | 22.168794 |
| 6 | 3.854725  | -1.407389 | 22.168794 |
| 6 | 3.854725  | 1.407389  | 22.168794 |
| 6 | 3.146197  | 2.634595  | 22.168794 |
| 6 | 0.708527  | 4.041984  | 22.168794 |
| 6 | -0.708527 | 4.041984  | 22.168794 |
| 6 | -3.146197 | 2.634595  | 22.168794 |
| 6 | -3.854725 | 1.407389  | 22.168794 |
| 6 | -3.854725 | -1.407389 | 22.168794 |
| 6 | -3.146197 | -2.634595 | 22.168794 |
| 6 | 1.402410  | -3.875346 | 20.950175 |
| 6 | 2.654943  | -3.152196 | 20.950175 |
| 6 | 4.057353  | -0.723150 | 20.950175 |
| 6 | 4.057353  | 0.723150  | 20.950175 |
| 6 | 2.654943  | 3.152196  | 20.950175 |
| 6 | 1.402410  | 3.875346  | 20.950175 |
| 6 | -1.402410 | 3.875346  | 20.950175 |
| 6 | -2.654943 | 3.152196  | 20.950175 |
| 6 | -4.057353 | 0.723150  | 20.950175 |
| 6 | -4.057353 | -0.723150 | 20.950175 |
| 6 | -2.654943 | -3.152196 | 20.950175 |
| 6 | -1.402410 | -3.875346 | 20.950175 |
| 6 | 3.144577  | -2.629061 | 19.725029 |
| 6 | 3.849122  | -1.408753 | 19.725029 |
| 6 | 3.849122  | 1.408753  | 19.725029 |
| 6 | 3.144577  | 2.629061  | 19.725029 |
| 6 | 0.704545  | 4.037814  | 19.725029 |
| 6 | -0.704545 | 4.037814  | 19.725029 |
| 6 | -3.144577 | 2.629061  | 19.725029 |
| 6 | -3.849122 | 1.408753  | 19.725029 |
| 6 | -3.849122 | -1.408753 | 19.725029 |
| 6 | -3.144577 | -2.629061 | 19.725029 |
| 6 | -0.704545 | -4.037814 | 19.725029 |
| 6 | 0.704545  | -4.037814 | 19.725029 |
| 6 | 4.038754  | -0.705511 | 18.473182 |

|   |           |           |           |
|---|-----------|-----------|-----------|
| 6 | 4.038754  | 0.705511  | 18.473182 |
| 6 | 2.630367  | 3.144908  | 18.473182 |
| 6 | 1.408387  | 3.850419  | 18.473182 |
| 6 | -1.408387 | 3.850419  | 18.473182 |
| 6 | -2.630367 | 3.144908  | 18.473182 |
| 6 | -4.038754 | 0.705511  | 18.473182 |
| 6 | -4.038754 | -0.705511 | 18.473182 |
| 6 | -2.630367 | -3.144908 | 18.473182 |
| 6 | -1.408387 | -3.850419 | 18.473182 |
| 6 | 1.408387  | -3.850419 | 18.473182 |
| 6 | 2.630367  | -3.144908 | 18.473182 |
| 6 | 3.875447  | 1.402368  | 17.249775 |
| 6 | 3.152210  | 2.655052  | 17.249775 |
| 6 | 0.723237  | 4.057420  | 17.249775 |
| 6 | -0.723237 | 4.057420  | 17.249775 |
| 6 | -3.152210 | 2.655052  | 17.249775 |
| 6 | -3.875447 | 1.402368  | 17.249775 |
| 6 | -3.875447 | -1.402368 | 17.249775 |
| 6 | -3.152210 | -2.655052 | 17.249775 |
| 6 | -0.723237 | -4.057420 | 17.249775 |
| 6 | 0.723237  | -4.057420 | 17.249775 |
| 6 | 3.152210  | -2.655052 | 17.249775 |
| 6 | 3.875447  | -1.402368 | 17.249775 |
| 6 | 2.633136  | 3.145795  | 16.029573 |
| 6 | 1.407771  | 3.853260  | 16.029573 |
| 6 | -1.407771 | 3.853260  | 16.029573 |
| 6 | -2.633136 | 3.145795  | 16.029573 |
| 6 | -4.040906 | 0.707465  | 16.029573 |
| 6 | -4.040906 | -0.707465 | 16.029573 |
| 6 | -2.633136 | -3.145795 | 16.029573 |
| 6 | -1.407771 | -3.853260 | 16.029573 |
| 6 | 1.407771  | -3.853260 | 16.029573 |
| 6 | 2.633136  | -3.145795 | 16.029573 |
| 6 | 4.040906  | -0.707465 | 16.029573 |
| 6 | 4.040906  | 0.707465  | 16.029573 |
| 6 | 0.703027  | 4.036275  | 14.778104 |
| 6 | -0.703027 | 4.036275  | 14.778104 |
| 6 | -3.144003 | 2.626977  | 14.778104 |
| 6 | -3.847030 | 1.409298  | 14.778104 |
| 6 | -3.847030 | -1.409298 | 14.778104 |
| 6 | -3.144003 | -2.626977 | 14.778104 |
| 6 | -0.703027 | -4.036275 | 14.778104 |
| 6 | 0.703027  | -4.036275 | 14.778104 |
| 6 | 3.144003  | -2.626977 | 14.778104 |
| 6 | 3.847030  | -1.409298 | 14.778104 |
| 6 | 3.847030  | 1.409298  | 14.778104 |
| 6 | 3.144003  | 2.626977  | 14.778104 |
| 6 | -1.402582 | 3.874861  | 13.549648 |
| 6 | -2.654437 | 3.152102  | 13.549648 |
| 6 | -4.057019 | 0.722759  | 13.549648 |
| 6 | -4.057019 | -0.722759 | 13.549648 |
| 6 | -2.654437 | -3.152102 | 13.549648 |
| 6 | -1.402582 | -3.874861 | 13.549648 |
| 6 | 1.402582  | -3.874861 | 13.549648 |
| 6 | 2.654437  | -3.152102 | 13.549648 |
| 6 | 4.057019  | -0.722759 | 13.549648 |
| 6 | 4.057019  | 0.722759  | 13.549648 |
| 6 | 2.654437  | 3.152102  | 13.549648 |
| 6 | 1.402582  | 3.874861  | 13.549648 |
| 6 | -3.147192 | 2.637489  | 12.333557 |
| 6 | -3.857728 | 1.406804  | 12.333557 |
| 6 | -3.857728 | -1.406804 | 12.333557 |
| 6 | -3.147192 | -2.637489 | 12.333557 |
| 6 | -0.710536 | -4.044292 | 12.333557 |
| 6 | 0.710536  | -4.044292 | 12.333557 |
| 6 | 3.147192  | -2.637489 | 12.333557 |
| 6 | 3.857728  | -1.406804 | 12.333557 |
| 6 | 3.857728  | 1.406804  | 12.333557 |
| 6 | 3.147192  | 2.637489  | 12.333557 |
| 6 | 0.710536  | 4.044292  | 12.333557 |

|   |           |           |           |
|---|-----------|-----------|-----------|
| 6 | -0.710536 | 4.044292  | 12.333557 |
| 6 | -4.034742 | 0.701303  | 11.083403 |
| 6 | -4.034742 | -0.701303 | 11.083403 |
| 6 | -2.624717 | -3.143538 | 11.083403 |
| 6 | -1.410025 | -3.844841 | 11.083403 |
| 6 | 1.410025  | -3.844841 | 11.083403 |
| 6 | 2.624717  | -3.143538 | 11.083403 |
| 6 | 4.034742  | -0.701303 | 11.083403 |
| 6 | 4.034742  | 0.701303  | 11.083403 |
| 6 | 2.624717  | 3.143538  | 11.083403 |
| 6 | 1.410025  | 3.844841  | 11.083403 |
| 6 | -1.410025 | 3.844841  | 11.083403 |
| 6 | -2.624717 | 3.143538  | 11.083403 |
| 6 | -3.873721 | -1.402980 | 9.850265  |
| 6 | -3.151877 | -2.653251 | 9.850265  |
| 6 | -0.721844 | -4.056231 | 9.850265  |
| 6 | 0.721844  | -4.056231 | 9.850265  |
| 6 | 3.151877  | -2.653251 | 9.850265  |
| 6 | 3.873721  | -1.402980 | 9.850265  |
| 6 | 3.873721  | 1.402980  | 9.850265  |
| 6 | 3.151877  | 2.653251  | 9.850265  |
| 6 | 0.721844  | 4.056231  | 9.850265  |
| 6 | -0.721844 | 4.056231  | 9.850265  |
| 6 | -3.151877 | 2.653251  | 9.850265  |
| 6 | -3.873721 | 1.402980  | 9.850265  |
| 6 | -2.641494 | -3.148505 | 8.637101  |
| 6 | -1.405938 | -3.861853 | 8.637101  |
| 6 | 1.405938  | -3.861853 | 8.637101  |
| 6 | 2.641494  | -3.148505 | 8.637101  |
| 6 | 4.047432  | -0.713348 | 8.637101  |
| 6 | 4.047432  | 0.713348  | 8.637101  |
| 6 | 2.641494  | 3.148505  | 8.637101  |
| 6 | 1.405938  | 3.861853  | 8.637101  |
| 6 | -1.405938 | 3.861853  | 8.637101  |
| 6 | -2.641494 | 3.148505  | 8.637101  |
| 6 | -4.047432 | 0.713348  | 8.637101  |
| 6 | -4.047432 | -0.713348 | 8.637101  |
| 6 | -0.700281 | -4.033968 | 7.388890  |
| 6 | 0.700281  | -4.033968 | 7.388890  |
| 6 | 3.143379  | -2.623445 | 7.388890  |
| 6 | 3.843660  | -1.410523 | 7.388890  |
| 6 | 3.843660  | 1.410523  | 7.388890  |
| 6 | 3.143379  | 2.623445  | 7.388890  |
| 6 | 0.700281  | 4.033968  | 7.388890  |
| 6 | -0.700281 | 4.033968  | 7.388890  |
| 6 | -3.143379 | 2.623445  | 7.388890  |
| 6 | -3.843660 | 1.410523  | 7.388890  |
| 6 | -3.843660 | -1.410523 | 7.388890  |
| 6 | -3.143379 | -2.623445 | 7.388890  |
| 6 | 1.403471  | -3.872187 | 6.151743  |
| 6 | 2.651677  | -3.151535 | 6.151743  |
| 6 | 4.055148  | -0.720652 | 6.151743  |
| 6 | 4.055148  | 0.720652  | 6.151743  |
| 6 | 2.651677  | 3.151535  | 6.151743  |
| 6 | 1.403471  | 3.872187  | 6.151743  |
| 6 | -1.403471 | 3.872187  | 6.151743  |
| 6 | -2.651677 | 3.151535  | 6.151743  |
| 6 | -4.055148 | 0.720652  | 6.151743  |
| 6 | -4.055148 | -0.720652 | 6.151743  |
| 6 | -2.651677 | -3.151535 | 6.151743  |
| 6 | -1.403471 | -3.872187 | 6.151743  |
| 6 | 3.149590  | -2.644850 | 4.940351  |
| 6 | 3.865302  | -1.405200 | 4.940351  |
| 6 | 3.865302  | 1.405200  | 4.940351  |
| 6 | 3.149590  | 2.644850  | 4.940351  |
| 6 | 0.715712  | 4.050050  | 4.940351  |
| 6 | -0.715712 | 4.050050  | 4.940351  |
| 6 | -3.149590 | 2.644850  | 4.940351  |
| 6 | -3.865302 | 1.405200  | 4.940351  |
| 6 | -3.865302 | -1.405200 | 4.940351  |

|   |           |           |           |
|---|-----------|-----------|-----------|
| 6 | -3.149590 | -2.644850 | 4.940351  |
| 6 | -0.715712 | -4.050050 | 4.940351  |
| 6 | 0.715712  | -4.050050 | 4.940351  |
| 6 | 4.033650  | -0.699773 | 3.694439  |
| 6 | 4.033650  | 0.699773  | 3.694439  |
| 6 | 2.622846  | 3.143356  | 3.694439  |
| 6 | 1.410803  | 3.843130  | 3.694439  |
| 6 | -1.410803 | 3.843130  | 3.694439  |
| 6 | -2.622846 | 3.143356  | 3.694439  |
| 6 | -4.033650 | 0.699773  | 3.694439  |
| 6 | -4.033650 | -0.699773 | 3.694439  |
| 6 | -2.622846 | -3.143356 | 3.694439  |
| 6 | -1.410803 | -3.843130 | 3.694439  |
| 6 | 1.410803  | -3.843130 | 3.694439  |
| 6 | 2.622846  | -3.143356 | 3.694439  |
| 6 | 3.870324  | 1.404002  | 2.453942  |
| 6 | 3.151063  | 2.649798  | 2.453942  |
| 6 | 0.719261  | 4.053800  | 2.453942  |
| 6 | -0.719261 | 4.053800  | 2.453942  |
| 6 | -3.151063 | 2.649798  | 2.453942  |
| 6 | -3.870324 | 1.404002  | 2.453942  |
| 6 | -3.870324 | -1.404002 | 2.453942  |
| 6 | -3.151063 | -2.649798 | 2.453942  |
| 6 | -0.719261 | -4.053800 | 2.453942  |
| 6 | 0.719261  | -4.053800 | 2.453942  |
| 6 | 3.151063  | -2.649798 | 2.453942  |
| 6 | 3.870324  | -1.404002 | 2.453942  |
| 6 | 2.647569  | 3.150430  | 1.243363  |
| 6 | 1.404568  | 3.868077  | 1.243363  |
| 6 | -1.404568 | 3.868077  | 1.243363  |
| 6 | -2.647569 | 3.150430  | 1.243363  |
| 6 | -4.052137 | 0.717647  | 1.243363  |
| 6 | -4.052137 | -0.717647 | 1.243363  |
| 6 | -2.647569 | -3.150430 | 1.243363  |
| 6 | -1.404568 | -3.868077 | 1.243363  |
| 6 | 1.404568  | -3.868077 | 1.243363  |
| 6 | 2.647569  | -3.150430 | 1.243363  |
| 6 | 4.052137  | -0.717647 | 1.243363  |
| 6 | 4.052137  | 0.717647  | 1.243363  |
| 6 | 0.699623  | 4.033568  | 0.000000  |
| 6 | -0.699623 | 4.033568  | 0.000000  |
| 6 | -3.143361 | 2.622676  | 0.000000  |
| 6 | -3.842984 | 1.410892  | 0.000000  |
| 6 | -3.842984 | -1.410892 | 0.000000  |
| 6 | -3.143361 | -2.622676 | 0.000000  |
| 6 | -0.699623 | -4.033568 | 0.000000  |
| 6 | 0.699623  | -4.033568 | 0.000000  |
| 6 | 3.143361  | -2.622676 | 0.000000  |
| 6 | 3.842984  | -1.410892 | 0.000000  |
| 6 | 3.842984  | 1.410892  | 0.000000  |
| 6 | 3.143361  | 2.622676  | 0.000000  |
| 6 | -1.404568 | 3.868077  | -1.243363 |
| 6 | -2.647569 | 3.150430  | -1.243363 |
| 6 | -4.052137 | 0.717647  | -1.243363 |
| 6 | -4.052137 | -0.717647 | -1.243363 |
| 6 | -2.647569 | -3.150430 | -1.243363 |
| 6 | -1.404568 | -3.868077 | -1.243363 |
| 6 | 1.404568  | -3.868077 | -1.243363 |
| 6 | 2.647569  | -3.150430 | -1.243363 |
| 6 | 4.052137  | -0.717647 | -1.243363 |
| 6 | 4.052137  | 0.717647  | -1.243363 |
| 6 | 2.647569  | 3.150430  | -1.243363 |
| 6 | 1.404568  | 3.868077  | -1.243363 |
| 6 | -3.151063 | 2.649798  | -2.453942 |
| 6 | -3.870324 | 1.404002  | -2.453942 |
| 6 | -3.870324 | -1.404002 | -2.453942 |
| 6 | -3.151063 | -2.649798 | -2.453942 |
| 6 | -0.719261 | -4.053800 | -2.453942 |
| 6 | 0.719261  | -4.053800 | -2.453942 |
| 6 | 3.151063  | -2.649798 | -2.453942 |

|   |           |           |           |
|---|-----------|-----------|-----------|
| 6 | 3.870324  | -1.404002 | -2.453942 |
| 6 | 3.870324  | 1.404002  | -2.453942 |
| 6 | 3.151063  | 2.649798  | -2.453942 |
| 6 | 0.719261  | 4.053800  | -2.453942 |
| 6 | -0.719261 | 4.053800  | -2.453942 |
| 6 | -4.033650 | 0.699773  | -3.694439 |
| 6 | -4.033650 | -0.699773 | -3.694439 |
| 6 | -2.622846 | -3.143356 | -3.694439 |
| 6 | -1.410803 | -3.843130 | -3.694439 |
| 6 | 1.410803  | -3.843130 | -3.694439 |
| 6 | 2.622846  | -3.143356 | -3.694439 |
| 6 | 4.033650  | -0.699773 | -3.694439 |
| 6 | 4.033650  | 0.699773  | -3.694439 |
| 6 | 2.622846  | 3.143356  | -3.694439 |
| 6 | 1.410803  | 3.843130  | -3.694439 |
| 6 | -1.410803 | 3.843130  | -3.694439 |
| 6 | -2.622846 | 3.143356  | -3.694439 |
| 6 | -3.865302 | -1.405200 | -4.940351 |
| 6 | -3.149590 | -2.644850 | -4.940351 |
| 6 | -0.715712 | -4.050050 | -4.940351 |
| 6 | 0.715712  | -4.050050 | -4.940351 |
| 6 | 3.149590  | -2.644850 | -4.940351 |
| 6 | 3.865302  | -1.405200 | -4.940351 |
| 6 | 3.865302  | 1.405200  | -4.940351 |
| 6 | 3.149590  | 2.644850  | -4.940351 |
| 6 | 0.715712  | 4.050050  | -4.940351 |
| 6 | -0.715712 | 4.050050  | -4.940351 |
| 6 | -3.149590 | 2.644850  | -4.940351 |
| 6 | -3.865302 | 1.405200  | -4.940351 |
| 6 | -2.651677 | -3.151535 | -6.151743 |
| 6 | -1.403471 | -3.872187 | -6.151743 |
| 6 | 1.403471  | -3.872187 | -6.151743 |
| 6 | 2.651677  | -3.151535 | -6.151743 |
| 6 | 4.055148  | -0.720652 | -6.151743 |
| 6 | 4.055148  | 0.720652  | -6.151743 |
| 6 | 2.651677  | 3.151535  | -6.151743 |
| 6 | 1.403471  | 3.872187  | -6.151743 |
| 6 | -1.403471 | 3.872187  | -6.151743 |
| 6 | -2.651677 | 3.151535  | -6.151743 |
| 6 | -4.055148 | 0.720652  | -6.151743 |
| 6 | -4.055148 | -0.720652 | -6.151743 |
| 6 | -0.700281 | -4.033968 | -7.388890 |
| 6 | 0.700281  | -4.033968 | -7.388890 |
| 6 | 3.143379  | -2.623445 | -7.388890 |
| 6 | 3.843660  | -1.410523 | -7.388890 |
| 6 | 3.843660  | 1.410523  | -7.388890 |
| 6 | 3.143379  | 2.623445  | -7.388890 |
| 6 | 0.700281  | 4.033968  | -7.388890 |
| 6 | -0.700281 | 4.033968  | -7.388890 |
| 6 | -3.143379 | 2.623445  | -7.388890 |
| 6 | -3.843660 | 1.410523  | -7.388890 |
| 6 | -3.843660 | -1.410523 | -7.388890 |
| 6 | -3.143379 | -2.623445 | -7.388890 |
| 6 | 1.405938  | -3.861853 | -8.637101 |
| 6 | 2.641494  | -3.148505 | -8.637101 |
| 6 | 4.047432  | -0.713348 | -8.637101 |
| 6 | 4.047432  | 0.713348  | -8.637101 |
| 6 | 2.641494  | 3.148505  | -8.637101 |
| 6 | 1.405938  | 3.861853  | -8.637101 |
| 6 | -1.405938 | 3.861853  | -8.637101 |
| 6 | -2.641494 | 3.148505  | -8.637101 |
| 6 | -4.047432 | 0.713348  | -8.637101 |
| 6 | -4.047432 | -0.713348 | -8.637101 |
| 6 | -2.641494 | -3.148505 | -8.637101 |
| 6 | -1.405938 | -3.861853 | -8.637101 |
| 6 | 3.151877  | -2.653251 | -9.850265 |
| 6 | 3.873721  | -1.402980 | -9.850265 |
| 6 | 3.873721  | 1.402980  | -9.850265 |
| 6 | 3.151877  | 2.653251  | -9.850265 |
| 6 | 0.721844  | 4.056231  | -9.850265 |



|   |           |           |            |
|---|-----------|-----------|------------|
| 6 | -0.721844 | 4.056231  | -9.850265  |
| 6 | -3.151877 | 2.653251  | -9.850265  |
| 6 | -3.873721 | 1.402980  | -9.850265  |
| 6 | -3.873721 | -1.402980 | -9.850265  |
| 6 | -3.151877 | -2.653251 | -9.850265  |
| 6 | -0.721844 | -4.056231 | -9.850265  |
| 6 | 0.721844  | -4.056231 | -9.850265  |
| 6 | 4.034742  | -0.701303 | -11.083403 |
| 6 | 4.034742  | 0.701303  | -11.083403 |
| 6 | 2.624717  | 3.143538  | -11.083403 |
| 6 | 1.410025  | 3.844841  | -11.083403 |
| 6 | -1.410025 | 3.844841  | -11.083403 |
| 6 | -2.624717 | 3.143538  | -11.083403 |
| 6 | -4.034742 | 0.701303  | -11.083403 |
| 6 | -4.034742 | -0.701303 | -11.083403 |
| 6 | -2.624717 | -3.143538 | -11.083403 |
| 6 | -1.410025 | -3.844841 | -11.083403 |
| 6 | 1.410025  | -3.844841 | -11.083403 |
| 6 | 2.624717  | -3.143538 | -11.083403 |
| 6 | 3.857728  | 1.406804  | -12.333557 |
| 6 | 3.147192  | 2.637489  | -12.333557 |
| 6 | 0.710536  | 4.044292  | -12.333557 |
| 6 | -0.710536 | 4.044292  | -12.333557 |
| 6 | -3.147192 | 2.637489  | -12.333557 |
| 6 | -3.857728 | 1.406804  | -12.333557 |
| 6 | -3.857728 | -1.406804 | -12.333557 |
| 6 | -3.147192 | -2.637489 | -12.333557 |
| 6 | -0.710536 | -4.044292 | -12.333557 |
| 6 | 0.710536  | -4.044292 | -12.333557 |
| 6 | 3.147192  | -2.637489 | -12.333557 |
| 6 | 3.857728  | -1.406804 | -12.333557 |
| 6 | 2.654437  | 3.152102  | -13.549648 |
| 6 | 1.402582  | 3.874861  | -13.549648 |
| 6 | -1.402582 | 3.874861  | -13.549648 |
| 6 | -2.654437 | 3.152102  | -13.549648 |
| 6 | -4.057019 | 0.722759  | -13.549648 |
| 6 | -4.057019 | -0.722759 | -13.549648 |
| 6 | -2.654437 | -3.152102 | -13.549648 |
| 6 | -1.402582 | -3.874861 | -13.549648 |
| 6 | 1.402582  | -3.874861 | -13.549648 |
| 6 | 2.654437  | -3.152102 | -13.549648 |
| 6 | 4.057019  | -0.722759 | -13.549648 |
| 6 | 4.057019  | 0.722759  | -13.549648 |
| 6 | 0.703027  | 4.036275  | -14.778104 |
| 6 | -0.703027 | 4.036275  | -14.778104 |
| 6 | -3.144003 | 2.626977  | -14.778104 |
| 6 | -3.847030 | 1.409298  | -14.778104 |
| 6 | -3.847030 | -1.409298 | -14.778104 |
| 6 | -3.144003 | -2.626977 | -14.778104 |
| 6 | -0.703027 | -4.036275 | -14.778104 |
| 6 | 0.703027  | -4.036275 | -14.778104 |
| 6 | 3.144003  | -2.626977 | -14.778104 |
| 6 | 3.847030  | -1.409298 | -14.778104 |
| 6 | 3.847030  | 1.409298  | -14.778104 |
| 6 | 3.144003  | 2.626977  | -14.778104 |
| 6 | -1.407771 | 3.853260  | -16.029573 |
| 6 | -2.633136 | 3.145795  | -16.029573 |
| 6 | -4.040906 | 0.707465  | -16.029573 |
| 6 | -4.040906 | -0.707465 | -16.029573 |
| 6 | -2.633136 | -3.145795 | -16.029573 |
| 6 | -1.407771 | -3.853260 | -16.029573 |
| 6 | 1.407771  | -3.853260 | -16.029573 |
| 6 | 2.633136  | -3.145795 | -16.029573 |
| 6 | 4.040906  | -0.707465 | -16.029573 |
| 6 | 4.040906  | 0.707465  | -16.029573 |
| 6 | 2.633136  | 3.145795  | -16.029573 |
| 6 | 1.407771  | 3.853260  | -16.029573 |
| 6 | -3.152210 | 2.655052  | -17.249775 |
| 6 | -3.875447 | 1.402368  | -17.249775 |
| 6 | -3.875447 | -1.402368 | -17.249775 |

|   |           |           |            |
|---|-----------|-----------|------------|
| 6 | -3.152210 | -2.655052 | -17.249775 |
| 6 | -0.723237 | -4.057420 | -17.249775 |
| 6 | 0.723237  | -4.057420 | -17.249775 |
| 6 | 3.152210  | -2.655052 | -17.249775 |
| 6 | 3.875447  | -1.402368 | -17.249775 |
| 6 | 3.875447  | 1.402368  | -17.249775 |
| 6 | 3.152210  | 2.655052  | -17.249775 |
| 6 | 0.723237  | 4.057420  | -17.249775 |
| 6 | -0.723237 | 4.057420  | -17.249775 |
| 6 | -4.038754 | 0.705511  | -18.473182 |
| 6 | -4.038754 | -0.705511 | -18.473182 |
| 6 | -2.630367 | -3.144908 | -18.473182 |
| 6 | -1.408387 | -3.850419 | -18.473182 |
| 6 | 1.408387  | -3.850419 | -18.473182 |
| 6 | 2.630367  | -3.144908 | -18.473182 |
| 6 | 4.038754  | -0.705511 | -18.473182 |
| 6 | 4.038754  | 0.705511  | -18.473182 |
| 6 | 2.630367  | 3.144908  | -18.473182 |
| 6 | 1.408387  | 3.850419  | -18.473182 |
| 6 | -1.408387 | 3.850419  | -18.473182 |
| 6 | -2.630367 | 3.144908  | -18.473182 |
| 6 | -3.849122 | -1.408753 | -19.725029 |
| 6 | -3.144577 | -2.629061 | -19.725029 |
| 6 | -0.704545 | -4.037814 | -19.725029 |
| 6 | 0.704545  | -4.037814 | -19.725029 |
| 6 | 3.144577  | -2.629061 | -19.725029 |
| 6 | 3.849122  | -1.408753 | -19.725029 |
| 6 | 3.849122  | 1.408753  | -19.725029 |
| 6 | 3.144577  | 2.629061  | -19.725029 |
| 6 | 0.704545  | 4.037814  | -19.725029 |
| 6 | -0.704545 | 4.037814  | -19.725029 |
| 6 | -3.144577 | 2.629061  | -19.725029 |
| 6 | -3.849122 | 1.408753  | -19.725029 |
| 6 | -2.654943 | -3.152196 | -20.950175 |
| 6 | -1.402410 | -3.875346 | -20.950175 |
| 6 | 1.402410  | -3.875346 | -20.950175 |
| 6 | 2.654943  | -3.152196 | -20.950175 |
| 6 | 4.057353  | -0.723150 | -20.950175 |
| 6 | 4.057353  | 0.723150  | -20.950175 |
| 6 | 2.654943  | 3.152196  | -20.950175 |
| 6 | 1.402410  | 3.875346  | -20.950175 |
| 6 | -1.402410 | 3.875346  | -20.950175 |
| 6 | -2.654943 | 3.152196  | -20.950175 |
| 6 | -4.057353 | 0.723150  | -20.950175 |
| 6 | -4.057353 | -0.723150 | -20.950175 |
| 6 | -0.708527 | -4.041984 | -22.168794 |
| 6 | 0.708527  | -4.041984 | -22.168794 |
| 6 | 3.146197  | -2.634595 | -22.168794 |
| 6 | 3.854725  | -1.407389 | -22.168794 |
| 6 | 3.854725  | 1.407389  | -22.168794 |
| 6 | 3.146197  | 2.634595  | -22.168794 |
| 6 | 0.708527  | 4.041984  | -22.168794 |
| 6 | -0.708527 | 4.041984  | -22.168794 |
| 6 | -3.146197 | 2.634595  | -22.168794 |
| 6 | -3.854725 | 1.407389  | -22.168794 |
| 6 | -3.854725 | -1.407389 | -22.168794 |
| 6 | -3.146197 | -2.634595 | -22.168794 |
| 6 | 1.409638  | -3.845953 | -23.419967 |
| 6 | 2.625874  | -3.143758 | -23.419967 |
| 6 | 4.035511  | -0.702194 | -23.419967 |
| 6 | 4.035511  | 0.702194  | -23.419967 |
| 6 | 2.625874  | 3.143758  | -23.419967 |
| 6 | 1.409638  | 3.845953  | -23.419967 |
| 6 | -1.409638 | 3.845953  | -23.419967 |
| 6 | -2.625874 | 3.143758  | -23.419967 |
| 6 | -4.035511 | 0.702194  | -23.419967 |
| 6 | -4.035511 | -0.702194 | -23.419967 |
| 6 | -2.625874 | -3.143758 | -23.419967 |
| 6 | -1.409638 | -3.845953 | -23.419967 |
| 6 | 3.152063  | -2.654143 | -24.650239 |

|   |           |           |            |
|---|-----------|-----------|------------|
| 6 | 3.874587  | -1.402695 | -24.650239 |
| 6 | 3.874587  | 1.402695  | -24.650239 |
| 6 | 3.152063  | 2.654143  | -24.650239 |
| 6 | 0.722523  | 4.056838  | -24.650239 |
| 6 | -0.722523 | 4.056838  | -24.650239 |
| 6 | -3.152063 | 2.654143  | -24.650239 |
| 6 | -3.874587 | 1.402695  | -24.650239 |
| 6 | -3.874587 | -1.402695 | -24.650239 |
| 6 | -3.152063 | -2.654143 | -24.650239 |
| 6 | -0.722523 | -4.056838 | -24.650239 |
| 6 | 0.722523  | -4.056838 | -24.650239 |
| 6 | 4.045435  | -0.711638 | -25.864932 |
| 6 | 4.045435  | 0.711638  | -25.864932 |
| 6 | 2.639014  | 3.147630  | -25.864932 |
| 6 | 1.406420  | 3.859269  | -25.864932 |
| 6 | -1.406420 | 3.859269  | -25.864932 |
| 6 | -2.639014 | 3.147630  | -25.864932 |
| 6 | -4.045435 | 0.711638  | -25.864932 |
| 6 | -4.045435 | -0.711638 | -25.864932 |
| 6 | -2.639014 | -3.147630 | -25.864932 |
| 6 | -1.406420 | -3.859269 | -25.864932 |
| 6 | 1.406420  | -3.859269 | -25.864932 |
| 6 | 2.639014  | -3.147630 | -25.864932 |
| 6 | 3.843900  | 1.410343  | -27.114564 |
| 6 | 3.143343  | 2.623743  | -27.114564 |
| 6 | 0.700557  | 4.034086  | -27.114564 |
| 6 | -0.700557 | 4.034086  | -27.114564 |
| 6 | -3.143343 | 2.623743  | -27.114564 |
| 6 | -3.843900 | 1.410343  | -27.114564 |
| 6 | -3.843900 | -1.410343 | -27.114564 |
| 6 | -3.143343 | -2.623743 | -27.114564 |
| 6 | -0.700557 | -4.034086 | -27.114564 |
| 6 | 0.700557  | -4.034086 | -27.114564 |
| 6 | 3.143343  | -2.623743 | -27.114564 |
| 6 | 3.843900  | -1.410343 | -27.114564 |
| 6 | 2.652848  | 3.151807  | -28.349606 |
| 6 | 1.403121  | 3.873337  | -28.349606 |
| 6 | -1.403121 | 3.873337  | -28.349606 |
| 6 | -2.652848 | 3.151807  | -28.349606 |
| 6 | -4.055968 | 0.721530  | -28.349606 |
| 6 | -4.055968 | -0.721530 | -28.349606 |
| 6 | -2.652848 | -3.151807 | -28.349606 |
| 6 | -1.403121 | -3.873337 | -28.349606 |
| 6 | 1.403121  | -3.873337 | -28.349606 |
| 6 | 2.652848  | -3.151807 | -28.349606 |
| 6 | 4.055968  | -0.721530 | -28.349606 |
| 6 | 4.055968  | 0.721530  | -28.349606 |
| 6 | 0.714491  | 4.048583  | -29.561436 |
| 6 | -0.714491 | 4.048583  | -29.561436 |
| 6 | -3.148931 | 2.643059  | -29.561436 |
| 6 | -3.863421 | 1.405525  | -29.561436 |
| 6 | -3.863421 | -1.405525 | -29.561436 |
| 6 | -3.148931 | -2.643059 | -29.561436 |
| 6 | -0.714491 | -4.048583 | -29.561436 |
| 6 | 0.714491  | -4.048583 | -29.561436 |
| 6 | 3.148931  | -2.643059 | -29.561436 |
| 6 | 3.863421  | -1.405525 | -29.561436 |
| 6 | 3.863421  | 1.405525  | -29.561436 |
| 6 | 3.148931  | 2.643059  | -29.561436 |
| 6 | -1.410887 | 3.842621  | -30.809018 |
| 6 | -2.622364 | 3.143175  | -30.809018 |
| 6 | -4.033251 | 0.699446  | -30.809018 |
| 6 | -4.033251 | -0.699446 | -30.809018 |
| 6 | -2.622364 | -3.143175 | -30.809018 |
| 6 | -1.410887 | -3.842621 | -30.809018 |
| 6 | 1.410887  | -3.842621 | -30.809018 |
| 6 | 2.622364  | -3.143175 | -30.809018 |
| 6 | 4.033251  | -0.699446 | -30.809018 |
| 6 | 4.033251  | 0.699446  | -30.809018 |
| 6 | 2.622364  | 3.143175  | -30.809018 |

|   |           |           |            |
|---|-----------|-----------|------------|
| 6 | 1.410887  | 3.842621  | -30.809018 |
| 6 | -3.151701 | 2.651550  | -32.048420 |
| 6 | -3.872160 | 1.403678  | -32.048420 |
| 6 | -3.872160 | -1.403678 | -32.048420 |
| 6 | -3.151701 | -2.651550 | -32.048420 |
| 6 | -0.720460 | -4.055228 | -32.048420 |
| 6 | 0.720460  | -4.055228 | -32.048420 |
| 6 | 3.151701  | -2.651550 | -32.048420 |
| 6 | 3.872160  | -1.403678 | -32.048420 |
| 6 | 3.872160  | 1.403678  | -32.048420 |
| 6 | 3.151701  | 2.651550  | -32.048420 |
| 6 | 0.720460  | 4.055228  | -32.048420 |
| 6 | -0.720460 | 4.055228  | -32.048420 |
| 6 | -4.052181 | 0.717165  | -33.258071 |
| 6 | -4.052181 | -0.717165 | -33.258071 |
| 6 | -2.647174 | -3.150709 | -33.258071 |
| 6 | -1.405007 | -3.867874 | -33.258071 |
| 6 | 1.405007  | -3.867874 | -33.258071 |
| 6 | 2.647174  | -3.150709 | -33.258071 |
| 6 | 4.052181  | -0.717165 | -33.258071 |
| 6 | 4.052181  | 0.717165  | -33.258071 |
| 6 | 2.647174  | 3.150709  | -33.258071 |
| 6 | 1.405007  | 3.867874  | -33.258071 |
| 6 | -1.405007 | 3.867874  | -33.258071 |
| 6 | -2.647174 | 3.150709  | -33.258071 |
| 6 | -3.842199 | -1.411830 | -34.503279 |
| 6 | -3.143780 | -2.621527 | -34.503279 |
| 6 | -0.698419 | -4.033357 | -34.503279 |
| 6 | 0.698419  | -4.033357 | -34.503279 |
| 6 | 3.143780  | -2.621527 | -34.503279 |
| 6 | 3.842199  | -1.411830 | -34.503279 |
| 6 | 3.842199  | 1.411830  | -34.503279 |
| 6 | 3.143780  | 2.621527  | -34.503279 |
| 6 | 0.698419  | 4.033357  | -34.503279 |
| 6 | -0.698419 | 4.033357  | -34.503279 |
| 6 | -3.143780 | 2.621527  | -34.503279 |
| 6 | -3.842199 | 1.411830  | -34.503279 |
| 6 | -2.649457 | -3.150513 | -35.747216 |
| 6 | -1.403696 | -3.869753 | -35.747216 |
| 6 | 1.403696  | -3.869753 | -35.747216 |
| 6 | 2.649457  | -3.150513 | -35.747216 |
| 6 | 4.053152  | -0.719240 | -35.747216 |
| 6 | 4.053152  | 0.719240  | -35.747216 |
| 6 | 2.649457  | 3.150513  | -35.747216 |
| 6 | 1.403696  | 3.869753  | -35.747216 |
| 6 | -1.403696 | 3.869753  | -35.747216 |
| 6 | -2.649457 | 3.150513  | -35.747216 |
| 6 | -4.053152 | 0.719240  | -35.747216 |
| 6 | -4.053152 | -0.719240 | -35.747216 |
| 6 | -0.718946 | -4.048804 | -36.954361 |
| 6 | 0.718946  | -4.048804 | -36.954361 |
| 6 | 3.146894  | -2.647028 | -36.954361 |
| 6 | 3.865840  | -1.401776 | -36.954361 |
| 6 | 3.865840  | 1.401776  | -36.954361 |
| 6 | 3.146894  | 2.647028  | -36.954361 |
| 6 | 0.718946  | 4.048804  | -36.954361 |
| 6 | -0.718946 | 4.048804  | -36.954361 |
| 6 | -3.146894 | 2.647028  | -36.954361 |
| 6 | -3.865840 | 1.401776  | -36.954361 |
| 6 | -3.865840 | -1.401776 | -36.954361 |
| 6 | -3.146894 | -2.647028 | -36.954361 |
| 6 | 1.407062  | -3.825876 | -38.197617 |
| 6 | 2.609775  | -3.131490 | -38.197617 |
| 6 | 4.016837  | -0.694387 | -38.197617 |
| 6 | 4.016837  | 0.694387  | -38.197617 |
| 6 | 2.609775  | 3.131490  | -38.197617 |
| 6 | 1.407062  | 3.825876  | -38.197617 |
| 6 | -1.407062 | 3.825876  | -38.197617 |
| 6 | -2.609775 | 3.131490  | -38.197617 |
| 6 | -4.016837 | 0.694387  | -38.197617 |

|   |           |           |            |
|---|-----------|-----------|------------|
| 6 | -4.016837 | -0.694387 | -38.197617 |
| 6 | -2.609775 | -3.131490 | -38.197617 |
| 6 | -1.407062 | -3.825876 | -38.197617 |
| 6 | 3.143411  | -2.646384 | -39.452458 |
| 6 | 3.863541  | -1.399082 | -39.452458 |
| 6 | 3.863541  | 1.399082  | -39.452458 |
| 6 | 3.143411  | 2.646384  | -39.452458 |
| 6 | 0.720130  | 4.045465  | -39.452458 |
| 6 | -0.720130 | 4.045465  | -39.452458 |
| 6 | -3.143411 | 2.646384  | -39.452458 |
| 6 | -3.863541 | 1.399082  | -39.452458 |
| 6 | -3.863541 | -1.399082 | -39.452458 |
| 6 | -3.143411 | -2.646384 | -39.452458 |
| 6 | -0.720130 | -4.045465 | -39.452458 |
| 6 | 0.720130  | -4.045465 | -39.452458 |
| 6 | 4.096429  | -0.730866 | -40.654425 |
| 6 | 4.096429  | 0.730866  | -40.654425 |
| 6 | 2.681163  | 3.182179  | -40.654425 |
| 6 | 1.415266  | 3.913045  | -40.654425 |
| 6 | -1.415266 | 3.913045  | -40.654425 |
| 6 | -2.681163 | 3.182179  | -40.654425 |
| 6 | -4.096429 | 0.730866  | -40.654425 |
| 6 | -4.096429 | -0.730866 | -40.654425 |
| 6 | -2.681163 | -3.182179 | -40.654425 |
| 6 | -1.415266 | -3.913045 | -40.654425 |
| 6 | 1.415266  | -3.913045 | -40.654425 |
| 6 | 2.681163  | -3.182179 | -40.654425 |
| 6 | 3.936039  | 1.492845  | -41.863775 |
| 6 | 3.260861  | 2.662287  | -41.863775 |
| 6 | 0.675178  | 4.155133  | -41.863775 |
| 6 | -0.675178 | 4.155133  | -41.863775 |
| 6 | -3.260861 | 2.662287  | -41.863775 |
| 6 | -3.936039 | 1.492845  | -41.863775 |
| 6 | -3.936039 | -1.492845 | -41.863775 |
| 6 | -3.260861 | -2.662287 | -41.863775 |
| 6 | -0.675178 | -4.155133 | -41.863775 |
| 6 | 0.675178  | -4.155133 | -41.863775 |
| 6 | 3.260861  | -2.662287 | -41.863775 |
| 6 | 3.936039  | -1.492845 | -41.863775 |
| 1 | -3.063550 | 3.159221  | 42.803441  |
| 1 | -4.267741 | 1.073502  | 42.803441  |
| 1 | -4.267741 | -1.073502 | 42.803441  |
| 1 | -3.063550 | -3.159221 | 42.803441  |
| 1 | -1.204190 | -4.232723 | 42.803441  |
| 1 | 1.204190  | -4.232723 | 42.803441  |
| 1 | 3.063550  | -3.159221 | 42.803441  |
| 1 | 4.267741  | -1.073502 | 42.803441  |
| 1 | 4.267741  | 1.073502  | 42.803441  |
| 1 | 3.063550  | 3.159221  | 42.803441  |
| 1 | 1.204190  | 4.232723  | 42.803441  |
| 1 | -1.204190 | 4.232723  | 42.803441  |
| 1 | 4.267741  | 1.073502  | -42.803441 |
| 1 | 3.063550  | 3.159221  | -42.803441 |
| 1 | 1.204190  | 4.232723  | -42.803441 |
| 1 | -1.204190 | 4.232723  | -42.803441 |
| 1 | -3.063550 | 3.159221  | -42.803441 |
| 1 | -4.267741 | 1.073502  | -42.803441 |
| 1 | -4.267741 | -1.073502 | -42.803441 |
| 1 | -3.063550 | -3.159221 | -42.803441 |
| 1 | -1.204190 | -4.232723 | -42.803441 |
| 1 | 1.204190  | -4.232723 | -42.803441 |
| 1 | 3.063550  | -3.159221 | -42.803441 |
| 1 | 4.267741  | -1.073502 | -42.803441 |

Nanotube (6,6) u35v0s  
B3LYP/STO-3G Energy: -31638.294486

C -3.889462 -1.758524 -43.104010

|   |           |           |            |
|---|-----------|-----------|------------|
| C | -4.247605 | -0.421775 | -43.104012 |
| C | -3.467774 | 2.489214  | -43.103977 |
| C | -2.489214 | 3.467773  | -43.103977 |
| C | 0.421774  | 4.247604  | -43.104012 |
| C | 1.758524  | 3.889461  | -43.104011 |
| C | 3.889461  | 1.758524  | -43.104011 |
| C | 4.247604  | 0.421774  | -43.104012 |
| C | 3.467773  | -2.489214 | -43.103977 |
| C | 2.489214  | -3.467774 | -43.103977 |
| C | -0.421775 | -4.247605 | -43.104012 |
| C | -1.758524 | -3.889462 | -43.104010 |
| C | -4.195965 | 0.363694  | -41.888405 |
| C | -3.815699 | 1.783067  | -41.888382 |
| C | -1.783068 | 3.815699  | -41.888382 |
| C | -0.363695 | 4.195965  | -41.888405 |
| C | 2.412967  | 3.452008  | -41.888406 |
| C | 3.452008  | 2.412967  | -41.888406 |
| C | 4.195965  | -0.363695 | -41.888405 |
| C | 3.815699  | -1.783068 | -41.888382 |
| C | 1.783067  | -3.815699 | -41.888382 |
| C | 0.363694  | -4.195965 | -41.888405 |
| C | -2.412968 | -3.452009 | -41.888406 |
| C | -3.452009 | -2.412968 | -41.888406 |
| C | -3.410945 | 2.384244  | -40.648069 |
| C | -2.384244 | 3.410944  | -40.648069 |
| C | 0.359320  | 4.146041  | -40.648094 |
| C | 1.761827  | 3.770246  | -40.648091 |
| C | 3.770246  | 1.761827  | -40.648091 |
| C | 4.146041  | 0.359320  | -40.648094 |
| C | 3.410944  | -2.384244 | -40.648069 |
| C | 2.384244  | -3.410945 | -40.648069 |
| C | -0.359320 | -4.146041 | -40.648093 |
| C | -1.761828 | -3.770246 | -40.648091 |
| C | -3.770246 | -1.761828 | -40.648091 |
| C | -4.146041 | -0.359320 | -40.648093 |
| C | -1.748497 | 3.762577  | -39.386882 |
| C | -0.367039 | 4.132729  | -39.386892 |
| C | 2.384251  | 3.395543  | -39.386897 |
| C | 3.395543  | 2.384251  | -39.386897 |
| C | 4.132729  | -0.367039 | -39.386892 |
| C | 3.762577  | -1.748497 | -39.386882 |
| C | 1.748496  | -3.762578 | -39.386882 |
| C | 0.367038  | -4.132730 | -39.386892 |
| C | -2.384251 | -3.395543 | -39.386897 |
| C | -3.395543 | -2.384251 | -39.386897 |
| C | -4.132730 | 0.367038  | -39.386892 |
| C | -3.762578 | 1.748496  | -39.386882 |
| C | 0.362868  | 4.150252  | -38.133009 |
| C | 1.760882  | 3.775672  | -38.133012 |
| C | 3.775672  | 1.760882  | -38.133012 |
| C | 4.150252  | 0.362868  | -38.133009 |
| C | 3.412820  | -2.389408 | -38.133002 |
| C | 2.389408  | -3.412820 | -38.133002 |
| C | -0.362868 | -4.150252 | -38.133009 |
| C | -1.760882 | -3.775673 | -38.133012 |
| C | -3.775673 | -1.760882 | -38.133012 |
| C | -4.150252 | -0.362868 | -38.133009 |
| C | -3.412820 | 2.389408  | -38.133002 |
| C | -2.389408 | 3.412820  | -38.133002 |
| C | 2.392472  | 3.417617  | -36.889403 |
| C | 3.417617  | 2.392472  | -36.889403 |
| C | 4.155921  | -0.363115 | -36.889399 |
| C | 3.780709  | -1.763497 | -36.889396 |
| C | 1.763497  | -3.780709 | -36.889396 |
| C | 0.363114  | -4.155921 | -36.889399 |
| C | -2.392472 | -3.417617 | -36.889403 |
| C | -3.417617 | -2.392472 | -36.889403 |
| C | -4.155921 | 0.363114  | -36.889399 |
| C | -3.780709 | 1.763497  | -36.889396 |
| C | -1.763497 | 3.780709  | -36.889396 |

|   |           |           |            |
|---|-----------|-----------|------------|
| C | -0.363115 | 4.155921  | -36.889399 |
| C | 3.776855  | 1.756522  | -35.636905 |
| C | 4.149087  | 0.367236  | -35.636903 |
| C | 3.409627  | -2.392609 | -35.636900 |
| C | 2.392608  | -3.409627 | -35.636900 |
| C | -0.367237 | -4.149087 | -35.636903 |
| C | -1.756522 | -3.776856 | -35.636905 |
| C | -3.776856 | -1.756522 | -35.636905 |
| C | -4.149087 | -0.367237 | -35.636903 |
| C | -3.409627 | 2.392608  | -35.636900 |
| C | -2.392609 | 3.409627  | -35.636900 |
| C | 0.367236  | 4.149087  | -35.636903 |
| C | 1.756522  | 3.776855  | -35.636905 |
| C | 4.153969  | -0.364682 | -34.382571 |
| C | 3.779803  | -1.761162 | -34.382569 |
| C | 1.761161  | -3.779804 | -34.382569 |
| C | 0.364681  | -4.153970 | -34.382571 |
| C | -2.392858 | -3.415146 | -34.382574 |
| C | -3.415146 | -2.392858 | -34.382574 |
| C | -4.153970 | 0.364681  | -34.382571 |
| C | -3.779804 | 1.761161  | -34.382569 |
| C | -1.761162 | 3.779803  | -34.382569 |
| C | -0.364682 | 4.153969  | -34.382571 |
| C | 2.392857  | 3.415145  | -34.382574 |
| C | 3.415145  | 2.392857  | -34.382574 |
| C | 3.418465  | -2.393053 | -33.136691 |
| C | 2.393053  | -3.418465 | -33.136691 |
| C | -0.363205 | -4.156958 | -33.136693 |
| C | -1.763954 | -3.781656 | -33.136694 |
| C | -3.781656 | -1.763954 | -33.136694 |
| C | -4.156958 | -0.363205 | -33.136693 |
| C | -3.418465 | 2.393053  | -33.136691 |
| C | -2.393053 | 3.418465  | -33.136691 |
| C | 0.363205  | 4.156958  | -33.136693 |
| C | 1.763953  | 3.781656  | -33.136694 |
| C | 3.781656  | 1.763953  | -33.136694 |
| C | 4.156958  | 0.363205  | -33.136693 |
| C | 1.757743  | -3.777200 | -31.886384 |
| C | 0.366339  | -4.150007 | -31.886385 |
| C | -2.392310 | -3.410882 | -31.886385 |
| C | -3.410882 | -2.392310 | -31.886385 |
| C | -4.150007 | 0.366339  | -31.886385 |
| C | -3.777200 | 1.757743  | -31.886384 |
| C | -1.757743 | 3.777200  | -31.886384 |
| C | -0.366339 | 4.150007  | -31.886385 |
| C | 2.392310  | 3.410881  | -31.886385 |
| C | 3.410881  | 2.392310  | -31.886385 |
| C | 4.150007  | -0.366339 | -31.886385 |
| C | 3.777200  | -1.757743 | -31.886384 |
| C | -0.365204 | -4.152162 | -30.631854 |
| C | -1.759820 | -3.778502 | -30.631854 |
| C | -3.778502 | -1.759820 | -30.631854 |
| C | -4.152162 | -0.365204 | -30.631854 |
| C | -3.413309 | 2.392386  | -30.631854 |
| C | -2.392387 | 3.413309  | -30.631854 |
| C | 0.365204  | 4.152162  | -30.631854 |
| C | 1.759820  | 3.778501  | -30.631854 |
| C | 3.778501  | 1.759820  | -30.631854 |
| C | 4.152162  | 0.365204  | -30.631854 |
| C | 3.413309  | -2.392387 | -30.631854 |
| C | 2.392386  | -3.413309 | -30.631854 |
| C | -2.392929 | -3.418128 | -29.384467 |
| C | -3.418128 | -2.392929 | -29.384467 |
| C | -4.156589 | 0.363254  | -29.384467 |
| C | -3.781358 | 1.763711  | -29.384467 |
| C | -1.763711 | 3.781358  | -29.384467 |
| C | -0.363254 | 4.156589  | -29.384467 |
| C | 2.392929  | 3.418128  | -29.384467 |
| C | 3.418128  | 2.392929  | -29.384467 |
| C | 4.156589  | -0.363254 | -29.384467 |

|   |           |           |            |
|---|-----------|-----------|------------|
| C | 3.781358  | -1.763711 | -29.384467 |
| C | 1.763711  | -3.781358 | -29.384467 |
| C | 0.363254  | -4.156589 | -29.384467 |
| C | -3.777939 | -1.758796 | -28.135476 |
| C | -4.151164 | -0.365808 | -28.135476 |
| C | -3.412142 | 2.392412  | -28.135476 |
| C | -2.392412 | 3.412142  | -28.135476 |
| C | 0.365808  | 4.151163  | -28.135476 |
| C | 1.758796  | 3.777939  | -28.135476 |
| C | 3.777939  | 1.758796  | -28.135476 |
| C | 4.151163  | 0.365808  | -28.135476 |
| C | 3.412142  | -2.392412 | -28.135476 |
| C | 2.392412  | -3.412142 | -28.135476 |
| C | -0.365808 | -4.151164 | -28.135476 |
| C | -1.758796 | -3.777939 | -28.135476 |
| C | -4.151411 | 0.365600  | -26.881159 |
| C | -3.778047 | 1.759089  | -26.881159 |
| C | -1.759089 | 3.778047  | -26.881159 |
| C | -0.365600 | 4.151411  | -26.881159 |
| C | 2.392368  | 3.412466  | -26.881159 |
| C | 3.412466  | 2.392368  | -26.881159 |
| C | 4.151411  | -0.365600 | -26.881159 |
| C | 3.778047  | -1.759089 | -26.881159 |
| C | 1.759089  | -3.778047 | -26.881159 |
| C | 0.365600  | -4.151411 | -26.881159 |
| C | -2.392368 | -3.412466 | -26.881159 |
| C | -3.412466 | -2.392368 | -26.881159 |
| C | -3.417813 | 2.392906  | -25.632535 |
| C | -2.392906 | 3.417813  | -25.632535 |
| C | 0.363399  | 4.156316  | -25.632534 |
| C | 1.763459  | 3.781196  | -25.632534 |
| C | 3.781196  | 1.763459  | -25.632534 |
| C | 4.156316  | 0.363399  | -25.632534 |
| C | 3.417813  | -2.392906 | -25.632535 |
| C | 2.392906  | -3.417813 | -25.632535 |
| C | -0.363399 | -4.156316 | -25.632534 |
| C | -1.763459 | -3.781196 | -25.632534 |
| C | -3.781196 | -1.763459 | -25.632534 |
| C | -4.156316 | -0.363399 | -25.632534 |
| C | -1.759701 | 3.778582  | -24.384412 |
| C | -0.365339 | 4.152179  | -24.384412 |
| C | 2.392524  | 3.413262  | -24.384411 |
| C | 3.413262  | 2.392524  | -24.384411 |
| C | 4.152179  | -0.365339 | -24.384412 |
| C | 3.778582  | -1.759701 | -24.384412 |
| C | 1.759702  | -3.778582 | -24.384412 |
| C | 0.365339  | -4.152179 | -24.384412 |
| C | -2.392524 | -3.413262 | -24.384411 |
| C | -3.413262 | -2.392524 | -24.384411 |
| C | -4.152179 | 0.365339  | -24.384412 |
| C | -3.778582 | 1.759702  | -24.384412 |
| C | 0.365871  | 4.150880  | -23.130522 |
| C | 1.758596  | 3.777724  | -23.130522 |
| C | 3.777724  | 1.758596  | -23.130522 |
| C | 4.150880  | 0.365871  | -23.130522 |
| C | 3.411867  | -2.392328 | -23.130523 |
| C | 2.392328  | -3.411867 | -23.130523 |
| C | -0.365871 | -4.150880 | -23.130522 |
| C | -1.758596 | -3.777724 | -23.130522 |
| C | -3.777724 | -1.758596 | -23.130522 |
| C | -4.150880 | -0.365871 | -23.130522 |
| C | -3.411867 | 2.392328  | -23.130523 |
| C | -2.392328 | 3.411867  | -23.130523 |
| C | 2.392861  | 3.417327  | -21.880778 |
| C | 3.417327  | 2.392861  | -21.880778 |
| C | 4.155866  | -0.363599 | -21.880778 |
| C | 3.780905  | -1.763055 | -21.880778 |
| C | 1.763055  | -3.780905 | -21.880778 |
| C | 0.363599  | -4.155866 | -21.880778 |
| C | -2.392861 | -3.417327 | -21.880778 |



|   |           |           |            |
|---|-----------|-----------|------------|
| C | -3.417327 | -2.392861 | -21.880778 |
| C | -4.155866 | 0.363599  | -21.880778 |
| C | -3.780905 | 1.763055  | -21.880778 |
| C | -1.763055 | 3.780905  | -21.880778 |
| C | -0.363599 | 4.155866  | -21.880778 |
| C | 3.779162  | 1.760524  | -20.633217 |
| C | 4.153089  | 0.364921  | -20.633217 |
| C | 3.414257  | -2.392612 | -20.633217 |
| C | 2.392612  | -3.414257 | -20.633217 |
| C | -0.364921 | -4.153089 | -20.633217 |
| C | -1.760524 | -3.779162 | -20.633217 |
| C | -3.779162 | -1.760524 | -20.633217 |
| C | -4.153089 | -0.364921 | -20.633217 |
| C | -3.414257 | 2.392612  | -20.633217 |
| C | -2.392612 | 3.414257  | -20.633217 |
| C | 0.364921  | 4.153089  | -20.633217 |
| C | 1.760524  | 3.779162  | -20.633217 |
| C | 4.150568  | -0.366030 | -19.379928 |
| C | 3.777533  | -1.758298 | -19.379928 |
| C | 1.758298  | -3.777533 | -19.379928 |
| C | 0.366030  | -4.150568 | -19.379928 |
| C | -2.392315 | -3.411518 | -19.379928 |
| C | -3.411518 | -2.392315 | -19.379928 |
| C | -4.150568 | 0.366030  | -19.379928 |
| C | -3.777533 | 1.758298  | -19.379928 |
| C | -1.758298 | 3.777533  | -19.379928 |
| C | -0.366030 | 4.150568  | -19.379928 |
| C | 2.392315  | 3.411518  | -19.379928 |
| C | 3.411518  | 2.392315  | -19.379928 |
| C | 3.416700  | -2.392800 | -18.129173 |
| C | 2.392800  | -3.416700 | -18.129173 |
| C | -0.363862 | -4.155296 | -18.129173 |
| C | -1.762545 | -3.780544 | -18.129173 |
| C | -3.780544 | -1.762545 | -18.129173 |
| C | -4.155296 | -0.363862 | -18.129173 |
| C | -3.416700 | 2.392800  | -18.129173 |
| C | -2.392800 | 3.416700  | -18.129173 |
| C | 0.363862  | 4.155296  | -18.129173 |
| C | 1.762545  | 3.780544  | -18.129173 |
| C | 3.780544  | 1.762545  | -18.129173 |
| C | 4.155296  | 0.363862  | -18.129173 |
| C | 1.761252  | -3.779675 | -16.881906 |
| C | 0.364546  | -4.153898 | -16.881906 |
| C | -2.392695 | -3.415148 | -16.881906 |
| C | -3.415148 | -2.392695 | -16.881906 |
| C | -4.153898 | 0.364546  | -16.881906 |
| C | -3.779675 | 1.761252  | -16.881906 |
| C | -1.761252 | 3.779675  | -16.881906 |
| C | -0.364545 | 4.153899  | -16.881906 |
| C | 2.392695  | 3.415148  | -16.881906 |
| C | 3.415148  | 2.392695  | -16.881906 |
| C | 4.153899  | -0.364545 | -16.881906 |
| C | 3.779675  | -1.761252 | -16.881906 |
| C | -0.366094 | -4.150460 | -15.629352 |
| C | -1.758191 | -3.777471 | -15.629352 |
| C | -3.777471 | -1.758191 | -15.629352 |
| C | -4.150460 | -0.366094 | -15.629352 |
| C | -3.411392 | 2.392314  | -15.629353 |
| C | -2.392314 | 3.411393  | -15.629353 |
| C | 0.366094  | 4.150460  | -15.629352 |
| C | 1.758191  | 3.777472  | -15.629352 |
| C | 3.777472  | 1.758191  | -15.629352 |
| C | 4.150460  | 0.366094  | -15.629352 |
| C | 3.411393  | -2.392314 | -15.629353 |
| C | 2.392314  | -3.411392 | -15.629353 |
| C | -2.392734 | -3.415972 | -14.377714 |
| C | -3.415972 | -2.392734 | -14.377714 |
| C | -4.154631 | 0.364168  | -14.377714 |
| C | -3.780121 | 1.761946  | -14.377714 |
| C | -1.761946 | 3.780121  | -14.377714 |

|   |           |           |            |
|---|-----------|-----------|------------|
| C | -0.364168 | 4.154632  | -14.377714 |
| C | 2.392734  | 3.415972  | -14.377715 |
| C | 3.415972  | 2.392734  | -14.377715 |
| C | 4.154632  | -0.364168 | -14.377714 |
| C | 3.780121  | -1.761946 | -14.377714 |
| C | 1.761946  | -3.780121 | -14.377714 |
| C | 0.364168  | -4.154631 | -14.377714 |
| C | -3.780111 | -1.761873 | -13.130491 |
| C | -4.154586 | -0.364227 | -13.130491 |
| C | -3.415902 | 2.392762  | -13.130490 |
| C | -2.392762 | 3.415903  | -13.130490 |
| C | 0.364227  | 4.154586  | -13.130491 |
| C | 1.761873  | 3.780111  | -13.130491 |
| C | 3.780111  | 1.761873  | -13.130491 |
| C | 4.154586  | 0.364227  | -13.130491 |
| C | 3.415903  | -2.392762 | -13.130490 |
| C | 2.392762  | -3.415902 | -13.130490 |
| C | -0.364227 | -4.154586 | -13.130491 |
| C | -1.761873 | -3.780111 | -13.130491 |
| C | -4.150545 | 0.366063  | -11.878768 |
| C | -3.777530 | 1.758261  | -11.878768 |
| C | -1.758260 | 3.777530  | -11.878768 |
| C | -0.366062 | 4.150545  | -11.878768 |
| C | 2.392331  | 3.411482  | -11.878768 |
| C | 3.411482  | 2.392331  | -11.878768 |
| C | 4.150545  | -0.366062 | -11.878768 |
| C | 3.777530  | -1.758260 | -11.878768 |
| C | 1.758261  | -3.777530 | -11.878768 |
| C | 0.366063  | -4.150545 | -11.878768 |
| C | -2.392330 | -3.411482 | -11.878767 |
| C | -3.411482 | -2.392330 | -11.878767 |
| C | -3.415176 | 2.392663  | -10.626404 |
| C | -2.392663 | 3.415177  | -10.626404 |
| C | 0.364504  | 4.153908  | -10.626403 |
| C | 1.761294  | 3.779663  | -10.626403 |
| C | 3.779663  | 1.761294  | -10.626403 |
| C | 4.153908  | 0.364504  | -10.626403 |
| C | 3.415177  | -2.392663 | -10.626404 |
| C | 2.392663  | -3.415176 | -10.626404 |
| C | -0.364504 | -4.153908 | -10.626403 |
| C | -1.761293 | -3.779662 | -10.626403 |
| C | -3.779662 | -1.761293 | -10.626403 |
| C | -4.153908 | -0.364504 | -10.626403 |
| C | -1.762362 | 3.780454  | -9.378988  |
| C | -0.363974 | 4.155127  | -9.378988  |
| C | 2.392814  | 3.416498  | -9.378988  |
| C | 3.416498  | 2.392814  | -9.378988  |
| C | 4.155127  | -0.363974 | -9.378988  |
| C | 3.780454  | -1.762362 | -9.378988  |
| C | 1.762362  | -3.780453 | -9.378988  |
| C | 0.363975  | -4.155127 | -9.378988  |
| C | -2.392814 | -3.416498 | -9.378988  |
| C | -3.416498 | -2.392814 | -9.378988  |
| C | -4.155127 | 0.363975  | -9.378988  |
| C | -3.780453 | 1.762362  | -9.378988  |
| C | 0.365945  | 4.150810  | -8.128145  |
| C | 1.758495  | 3.777700  | -8.128145  |
| C | 3.777700  | 1.758495  | -8.128145  |
| C | 4.150810  | 0.365945  | -8.128145  |
| C | 3.411771  | -2.392360 | -8.128145  |
| C | 2.392361  | -3.411770 | -8.128145  |
| C | -0.365944 | -4.150810 | -8.128145  |
| C | -1.758495 | -3.777700 | -8.128145  |
| C | -3.777700 | -1.758495 | -8.128145  |
| C | -4.150810 | -0.365944 | -8.128145  |
| C | -3.411770 | 2.392361  | -8.128145  |
| C | -2.392360 | 3.411771  | -8.128145  |
| C | 2.392591  | 3.414361  | -6.875239  |
| C | 3.414361  | 2.392591  | -6.875239  |
| C | 4.153166  | -0.364849 | -6.875239  |

|   |           |           |           |
|---|-----------|-----------|-----------|
| C | 3.779193  | -1.760623 | -6.875239 |
| C | 1.760623  | -3.779192 | -6.875239 |
| C | 0.364849  | -4.153166 | -6.875239 |
| C | -2.392590 | -3.414360 | -6.875239 |
| C | -3.414360 | -2.392590 | -6.875239 |
| C | -4.153166 | 0.364849  | -6.875239 |
| C | -3.779192 | 1.760623  | -6.875239 |
| C | -1.760623 | 3.779193  | -6.875239 |
| C | -0.364849 | 4.153166  | -6.875239 |
| C | 3.780690  | 1.762700  | -5.627420 |
| C | 4.155501  | 0.363800  | -5.627420 |
| C | 3.416909  | -2.392849 | -5.627420 |
| C | 2.392850  | -3.416909 | -5.627420 |
| C | -0.363800 | -4.155500 | -5.627420 |
| C | -1.762700 | -3.780689 | -5.627420 |
| C | -3.780689 | -1.762700 | -5.627420 |
| C | -4.155500 | -0.363800 | -5.627420 |
| C | -3.416909 | 2.392850  | -5.627420 |
| C | -2.392849 | 3.416909  | -5.627420 |
| C | 0.363800  | 4.155501  | -5.627420 |
| C | 1.762700  | 3.780690  | -5.627420 |
| C | 4.151234  | -0.365750 | -4.377457 |
| C | 3.777969  | -1.758875 | -4.377457 |
| C | 1.758876  | -3.777969 | -4.377457 |
| C | 0.365750  | -4.151233 | -4.377457 |
| C | -2.392403 | -3.412235 | -4.377457 |
| C | -3.412235 | -2.392403 | -4.377457 |
| C | -4.151233 | 0.365750  | -4.377457 |
| C | -3.777969 | 1.758876  | -4.377457 |
| C | -1.758875 | 3.777969  | -4.377457 |
| C | -0.365750 | 4.151234  | -4.377457 |
| C | 2.392404  | 3.412235  | -4.377457 |
| C | 3.412235  | 2.392404  | -4.377457 |
| C | 3.413569  | -2.392521 | -3.124216 |
| C | 2.392521  | -3.413569 | -3.124216 |
| C | -0.365185 | -4.152446 | -3.124216 |
| C | -1.759972 | -3.778737 | -3.124216 |
| C | -3.778737 | -1.759972 | -3.124216 |
| C | -4.152446 | -0.365185 | -3.124216 |
| C | -3.413569 | 2.392521  | -3.124216 |
| C | -2.392521 | 3.413569  | -3.124216 |
| C | 0.365185  | 4.152446  | -3.124216 |
| C | 1.759972  | 3.778737  | -3.124216 |
| C | 3.778737  | 1.759972  | -3.124216 |
| C | 4.152446  | 0.365185  | -3.124216 |
| C | 1.762873  | -3.780810 | -1.875811 |
| C | 0.363711  | -4.155691 | -1.875811 |
| C | -2.392868 | -3.417119 | -1.875811 |
| C | -3.417119 | -2.392868 | -1.875811 |
| C | -4.155691 | 0.363711  | -1.875811 |
| C | -3.780810 | 1.762873  | -1.875811 |
| C | -1.762873 | 3.780810  | -1.875811 |
| C | -0.363710 | 4.155692  | -1.875811 |
| C | 2.392868  | 3.417119  | -1.875811 |
| C | 3.417119  | 2.392868  | -1.875811 |
| C | 4.155692  | -0.363710 | -1.875811 |
| C | 3.780810  | -1.762873 | -1.875811 |
| C | -0.365491 | -4.151789 | -0.626677 |
| C | -1.759378 | -3.778321 | -0.626677 |
| C | -3.778321 | -1.759378 | -0.626677 |
| C | -4.151789 | -0.365491 | -0.626677 |
| C | -3.412846 | 2.392458  | -0.626677 |
| C | -2.392458 | 3.412846  | -0.626677 |
| C | 0.365491  | 4.151790  | -0.626677 |
| C | 1.759378  | 3.778322  | -0.626677 |
| C | 3.778322  | 1.759378  | -0.626677 |
| C | 4.151790  | 0.365491  | -0.626677 |
| C | 3.412846  | -2.392458 | -0.626677 |
| C | 2.392458  | -3.412846 | -0.626677 |
| C | -2.392458 | -3.412846 | 0.626677  |

|   |           |           |          |
|---|-----------|-----------|----------|
| C | -3.412846 | -2.392458 | 0.626677 |
| C | -4.151789 | 0.365491  | 0.626677 |
| C | -3.778321 | 1.759378  | 0.626677 |
| C | -1.759378 | 3.778322  | 0.626677 |
| C | -0.365491 | 4.151790  | 0.626677 |
| C | 2.392458  | 3.412846  | 0.626677 |
| C | 3.412846  | 2.392458  | 0.626677 |
| C | 4.151790  | -0.365491 | 0.626677 |
| C | 3.778322  | -1.759378 | 0.626677 |
| C | 1.759378  | -3.778321 | 0.626677 |
| C | 0.365491  | -4.151789 | 0.626677 |
| C | -3.780810 | -1.762873 | 1.875811 |
| C | -4.155691 | -0.363710 | 1.875811 |
| C | -3.417119 | 2.392868  | 1.875811 |
| C | -2.392868 | 3.417119  | 1.875811 |
| C | 0.363711  | 4.155692  | 1.875811 |
| C | 1.762873  | 3.780810  | 1.875811 |
| C | 3.780810  | 1.762873  | 1.875811 |
| C | 4.155692  | 0.363711  | 1.875811 |
| C | 3.417119  | -2.392868 | 1.875811 |
| C | 2.392868  | -3.417119 | 1.875811 |
| C | -0.363710 | -4.155691 | 1.875811 |
| C | -1.762873 | -3.780810 | 1.875811 |
| C | -4.152446 | 0.365185  | 3.124216 |
| C | -3.778737 | 1.759972  | 3.124216 |
| C | -1.759972 | 3.778737  | 3.124216 |
| C | -0.365185 | 4.152446  | 3.124216 |
| C | 2.392521  | 3.413569  | 3.124216 |
| C | 3.413569  | 2.392521  | 3.124216 |
| C | 4.152446  | -0.365185 | 3.124216 |
| C | 3.778737  | -1.759972 | 3.124216 |
| C | 1.759972  | -3.778737 | 3.124216 |
| C | 0.365185  | -4.152446 | 3.124216 |
| C | -2.392521 | -3.413569 | 3.124216 |
| C | -3.413569 | -2.392521 | 3.124216 |
| C | -3.412235 | 2.392404  | 4.377457 |
| C | -2.392403 | 3.412235  | 4.377457 |
| C | 0.365750  | 4.151234  | 4.377457 |
| C | 1.758876  | 3.777969  | 4.377457 |
| C | 3.777969  | 1.758876  | 4.377457 |
| C | 4.151234  | 0.365750  | 4.377457 |
| C | 3.412235  | -2.392403 | 4.377457 |
| C | 2.392404  | -3.412235 | 4.377457 |
| C | -0.365750 | -4.151233 | 4.377457 |
| C | -1.758875 | -3.777969 | 4.377457 |
| C | -3.777969 | -1.758875 | 4.377457 |
| C | -4.151233 | -0.365750 | 4.377457 |
| C | -1.762700 | 3.780690  | 5.627420 |
| C | -0.363800 | 4.155501  | 5.627420 |
| C | 2.392850  | 3.416909  | 5.627420 |
| C | 3.416909  | 2.392850  | 5.627420 |
| C | 4.155501  | -0.363800 | 5.627420 |
| C | 3.780690  | -1.762700 | 5.627420 |
| C | 1.762700  | -3.780689 | 5.627420 |
| C | 0.363800  | -4.155500 | 5.627420 |
| C | -2.392849 | -3.416909 | 5.627420 |
| C | -3.416909 | -2.392849 | 5.627420 |
| C | -4.155500 | 0.363800  | 5.627420 |
| C | -3.780689 | 1.762700  | 5.627420 |
| C | 0.364849  | 4.153166  | 6.875239 |
| C | 1.760623  | 3.779193  | 6.875239 |
| C | 3.779193  | 1.760623  | 6.875239 |
| C | 4.153166  | 0.364849  | 6.875239 |
| C | 3.414361  | -2.392590 | 6.875239 |
| C | 2.392591  | -3.414360 | 6.875239 |
| C | -0.364849 | -4.153166 | 6.875239 |
| C | -1.760623 | -3.779192 | 6.875239 |
| C | -3.779192 | -1.760623 | 6.875239 |
| C | -4.153166 | -0.364849 | 6.875239 |
| C | -3.414360 | 2.392591  | 6.875239 |

|   |           |           |           |
|---|-----------|-----------|-----------|
| C | -2.392590 | 3.414361  | 6.875239  |
| C | 2.392361  | 3.411771  | 8.128145  |
| C | 3.411771  | 2.392361  | 8.128145  |
| C | 4.150810  | -0.365944 | 8.128145  |
| C | 3.777700  | -1.758495 | 8.128145  |
| C | 1.758495  | -3.777700 | 8.128145  |
| C | 0.365945  | -4.150810 | 8.128145  |
| C | -2.392360 | -3.411770 | 8.128145  |
| C | -3.411770 | -2.392360 | 8.128145  |
| C | -4.150810 | 0.365945  | 8.128145  |
| C | -3.777700 | 1.758495  | 8.128145  |
| C | -1.758495 | 3.777700  | 8.128145  |
| C | -0.365944 | 4.150810  | 8.128145  |
| C | 3.780454  | 1.762362  | 9.378988  |
| C | 4.155127  | 0.363975  | 9.378988  |
| C | 3.416498  | -2.392814 | 9.378988  |
| C | 2.392814  | -3.416498 | 9.378988  |
| C | -0.363974 | -4.155127 | 9.378988  |
| C | -1.762362 | -3.780453 | 9.378988  |
| C | -3.780453 | -1.762362 | 9.378988  |
| C | -4.155127 | -0.363974 | 9.378988  |
| C | -3.416498 | 2.392814  | 9.378988  |
| C | -2.392814 | 3.416498  | 9.378988  |
| C | 0.363975  | 4.155127  | 9.378988  |
| C | 1.762362  | 3.780454  | 9.378988  |
| C | 4.153908  | -0.364504 | 10.626403 |
| C | 3.779663  | -1.761293 | 10.626403 |
| C | 1.761294  | -3.779662 | 10.626403 |
| C | 0.364504  | -4.153908 | 10.626403 |
| C | -2.392663 | -3.415176 | 10.626404 |
| C | -3.415176 | -2.392663 | 10.626404 |
| C | -4.153908 | 0.364504  | 10.626403 |
| C | -3.779662 | 1.761294  | 10.626403 |
| C | -1.761293 | 3.779663  | 10.626403 |
| C | -0.364504 | 4.153908  | 10.626403 |
| C | 2.392663  | 3.415177  | 10.626404 |
| C | 3.415177  | 2.392663  | 10.626404 |
| C | 3.411482  | -2.392330 | 11.878768 |
| C | 2.392331  | -3.411482 | 11.878768 |
| C | -0.366062 | -4.150545 | 11.878768 |
| C | -1.758260 | -3.777530 | 11.878768 |
| C | -3.777530 | -1.758260 | 11.878768 |
| C | -4.150545 | -0.366062 | 11.878768 |
| C | -3.411482 | 2.392331  | 11.878768 |
| C | -2.392330 | 3.411482  | 11.878768 |
| C | 0.366063  | 4.150546  | 11.878768 |
| C | 1.758261  | 3.777530  | 11.878768 |
| C | 3.777530  | 1.758261  | 11.878768 |
| C | 4.150546  | 0.366063  | 11.878768 |
| C | 1.761873  | -3.780111 | 13.130491 |
| C | 0.364227  | -4.154586 | 13.130491 |
| C | -2.392762 | -3.415902 | 13.130490 |
| C | -3.415902 | -2.392762 | 13.130490 |
| C | -4.154586 | 0.364227  | 13.130491 |
| C | -3.780111 | 1.761873  | 13.130491 |
| C | -1.761873 | 3.780111  | 13.130491 |
| C | -0.364227 | 4.154586  | 13.130491 |
| C | 2.392762  | 3.415903  | 13.130491 |
| C | 3.415903  | 2.392762  | 13.130491 |
| C | 4.154586  | -0.364227 | 13.130491 |
| C | 3.780111  | -1.761873 | 13.130491 |
| C | -0.364168 | -4.154631 | 14.377714 |
| C | -1.761946 | -3.780121 | 14.377714 |
| C | -3.780121 | -1.761946 | 14.377714 |
| C | -4.154631 | -0.364168 | 14.377714 |
| C | -3.415972 | 2.392734  | 14.377715 |
| C | -2.392734 | 3.415972  | 14.377715 |
| C | 0.364168  | 4.154632  | 14.377714 |
| C | 1.761946  | 3.780121  | 14.377714 |
| C | 3.780121  | 1.761946  | 14.377714 |

|   |           |           |           |
|---|-----------|-----------|-----------|
| C | 4.154632  | 0.364168  | 14.377714 |
| C | 3.415972  | -2.392734 | 14.377715 |
| C | 2.392734  | -3.415972 | 14.377715 |
| C | -2.392314 | -3.411392 | 15.629353 |
| C | -3.411392 | -2.392314 | 15.629353 |
| C | -4.150460 | 0.366094  | 15.629352 |
| C | -3.777471 | 1.758191  | 15.629352 |
| C | -1.758191 | 3.777472  | 15.629352 |
| C | -0.366094 | 4.150460  | 15.629352 |
| C | 2.392314  | 3.411393  | 15.629353 |
| C | 3.411393  | 2.392314  | 15.629353 |
| C | 4.150460  | -0.366094 | 15.629352 |
| C | 3.777472  | -1.758191 | 15.629352 |
| C | 1.758191  | -3.777471 | 15.629352 |
| C | 0.366094  | -4.150460 | 15.629352 |
| C | -3.779675 | -1.761252 | 16.881906 |
| C | -4.153898 | -0.364545 | 16.881906 |
| C | -3.415148 | 2.392695  | 16.881906 |
| C | -2.392695 | 3.415148  | 16.881906 |
| C | 0.364546  | 4.153899  | 16.881906 |
| C | 1.761252  | 3.779675  | 16.881906 |
| C | 3.779675  | 1.761252  | 16.881906 |
| C | 4.153899  | 0.364546  | 16.881906 |
| C | 3.415148  | -2.392695 | 16.881906 |
| C | 2.392695  | -3.415148 | 16.881906 |
| C | -0.364545 | -4.153898 | 16.881906 |
| C | -1.761252 | -3.779675 | 16.881906 |
| C | -4.155296 | 0.363862  | 18.129173 |
| C | -3.780543 | 1.762545  | 18.129173 |
| C | -1.762545 | 3.780544  | 18.129173 |
| C | -0.363862 | 4.155296  | 18.129173 |
| C | 2.392800  | 3.416700  | 18.129173 |
| C | 3.416700  | 2.392800  | 18.129173 |
| C | 4.155296  | -0.363862 | 18.129173 |
| C | 3.780544  | -1.762545 | 18.129173 |
| C | 1.762545  | -3.780543 | 18.129173 |
| C | 0.363862  | -4.155296 | 18.129173 |
| C | -2.392800 | -3.416700 | 18.129173 |
| C | -3.416700 | -2.392800 | 18.129173 |
| C | -3.411518 | 2.392315  | 19.379928 |
| C | -2.392315 | 3.411518  | 19.379928 |
| C | 0.366030  | 4.150568  | 19.379928 |
| C | 1.758299  | 3.777533  | 19.379928 |
| C | 3.777533  | 1.758299  | 19.379928 |
| C | 4.150568  | 0.366030  | 19.379928 |
| C | 3.411518  | -2.392315 | 19.379928 |
| C | 2.392315  | -3.411518 | 19.379928 |
| C | -0.366030 | -4.150568 | 19.379928 |
| C | -1.758298 | -3.777533 | 19.379928 |
| C | -3.777533 | -1.758298 | 19.379928 |
| C | -4.150568 | -0.366030 | 19.379928 |
| C | -1.760524 | 3.779162  | 20.633217 |
| C | -0.364921 | 4.153089  | 20.633217 |
| C | 2.392612  | 3.414257  | 20.633217 |
| C | 3.414257  | 2.392612  | 20.633217 |
| C | 4.153089  | -0.364921 | 20.633217 |
| C | 3.779162  | -1.760524 | 20.633217 |
| C | 1.760524  | -3.779162 | 20.633217 |
| C | 0.364921  | -4.153089 | 20.633217 |
| C | -2.392612 | -3.414257 | 20.633217 |
| C | -3.414257 | -2.392612 | 20.633217 |
| C | -4.153089 | 0.364921  | 20.633217 |
| C | -3.779162 | 1.760524  | 20.633217 |
| C | 0.363599  | 4.155866  | 21.880778 |
| C | 1.763055  | 3.780905  | 21.880778 |
| C | 3.780905  | 1.763055  | 21.880778 |
| C | 4.155866  | 0.363599  | 21.880778 |
| C | 3.417327  | -2.392860 | 21.880778 |
| C | 2.392861  | -3.417327 | 21.880778 |
| C | -0.363599 | -4.155866 | 21.880778 |

|   |           |           |           |
|---|-----------|-----------|-----------|
| C | -1.763055 | -3.780905 | 21.880778 |
| C | -3.780905 | -1.763055 | 21.880778 |
| C | -4.155866 | -0.363599 | 21.880778 |
| C | -3.417327 | 2.392861  | 21.880778 |
| C | -2.392860 | 3.417327  | 21.880778 |
| C | 2.392328  | 3.411867  | 23.130523 |
| C | 3.411867  | 2.392328  | 23.130523 |
| C | 4.150880  | -0.365871 | 23.130522 |
| C | 3.777724  | -1.758596 | 23.130522 |
| C | 1.758596  | -3.777724 | 23.130522 |
| C | 0.365871  | -4.150880 | 23.130522 |
| C | -2.392328 | -3.411867 | 23.130523 |
| C | -3.411867 | -2.392328 | 23.130523 |
| C | -4.150880 | 0.365871  | 23.130522 |
| C | -3.777724 | 1.758596  | 23.130522 |
| C | -1.758596 | 3.777724  | 23.130522 |
| C | -0.365871 | 4.150880  | 23.130522 |
| C | 3.778582  | 1.759702  | 24.384412 |
| C | 4.152179  | 0.365339  | 24.384412 |
| C | 3.413262  | -2.392524 | 24.384411 |
| C | 2.392524  | -3.413262 | 24.384411 |
| C | -0.365339 | -4.152179 | 24.384412 |
| C | -1.759701 | -3.778582 | 24.384412 |
| C | -3.778582 | -1.759701 | 24.384412 |
| C | -4.152179 | -0.365339 | 24.384412 |
| C | -3.413262 | 2.392524  | 24.384411 |
| C | -2.392524 | 3.413262  | 24.384411 |
| C | 0.365339  | 4.152179  | 24.384412 |
| C | 1.759702  | 3.778582  | 24.384412 |
| C | 4.156316  | -0.363399 | 25.632534 |
| C | 3.781196  | -1.763459 | 25.632534 |
| C | 1.763459  | -3.781196 | 25.632534 |
| C | 0.363399  | -4.156316 | 25.632534 |
| C | -2.392906 | -3.417813 | 25.632535 |
| C | -3.417813 | -2.392906 | 25.632535 |
| C | -4.156316 | 0.363399  | 25.632534 |
| C | -3.781196 | 1.763459  | 25.632534 |
| C | -1.763459 | 3.781196  | 25.632534 |
| C | -0.363399 | 4.156316  | 25.632534 |
| C | 2.392906  | 3.417813  | 25.632535 |
| C | 3.417813  | 2.392906  | 25.632535 |
| C | 3.412466  | -2.392368 | 26.881159 |
| C | 2.392368  | -3.412466 | 26.881159 |
| C | -0.365600 | -4.151411 | 26.881159 |
| C | -1.759089 | -3.778047 | 26.881159 |
| C | -3.778047 | -1.759089 | 26.881159 |
| C | -4.151411 | -0.365600 | 26.881159 |
| C | -3.412466 | 2.392368  | 26.881159 |
| C | -2.392368 | 3.412466  | 26.881159 |
| C | 0.365600  | 4.151411  | 26.881159 |
| C | 1.759089  | 3.778047  | 26.881159 |
| C | 3.778047  | 1.759089  | 26.881159 |
| C | 4.151411  | 0.365600  | 26.881159 |
| C | 1.758796  | -3.777939 | 28.135476 |
| C | 0.365808  | -4.151164 | 28.135476 |
| C | -2.392412 | -3.412142 | 28.135476 |
| C | -3.412142 | -2.392412 | 28.135476 |
| C | -4.151164 | 0.365808  | 28.135476 |
| C | -3.777939 | 1.758796  | 28.135476 |
| C | -1.758796 | 3.777939  | 28.135476 |
| C | -0.365808 | 4.151163  | 28.135476 |
| C | 2.392412  | 3.412142  | 28.135476 |
| C | 3.412142  | 2.392412  | 28.135476 |
| C | 4.151163  | -0.365808 | 28.135476 |
| C | 3.777939  | -1.758796 | 28.135476 |
| C | -0.363254 | -4.156589 | 29.384467 |
| C | -1.763711 | -3.781358 | 29.384467 |
| C | -3.781358 | -1.763711 | 29.384467 |
| C | -4.156589 | -0.363254 | 29.384467 |
| C | -3.418128 | 2.392929  | 29.384467 |

|   |           |           |           |
|---|-----------|-----------|-----------|
| C | -2.392929 | 3.418128  | 29.384467 |
| C | 0.363254  | 4.156589  | 29.384467 |
| C | 1.763711  | 3.781358  | 29.384467 |
| C | 3.781358  | 1.763711  | 29.384467 |
| C | 4.156589  | 0.363254  | 29.384467 |
| C | 3.418128  | -2.392929 | 29.384467 |
| C | 2.392929  | -3.418128 | 29.384467 |
| C | -2.392387 | -3.413309 | 30.631854 |
| C | -3.413309 | -2.392387 | 30.631854 |
| C | -4.152162 | 0.365204  | 30.631854 |
| C | -3.778502 | 1.759820  | 30.631854 |
| C | -1.759820 | 3.778501  | 30.631854 |
| C | -0.365204 | 4.152162  | 30.631854 |
| C | 2.392387  | 3.413309  | 30.631854 |
| C | 3.413309  | 2.392387  | 30.631854 |
| C | 4.152162  | -0.365204 | 30.631854 |
| C | 3.778501  | -1.759820 | 30.631854 |
| C | 1.759820  | -3.778502 | 30.631854 |
| C | 0.365204  | -4.152162 | 30.631854 |
| C | -3.777200 | -1.757743 | 31.886384 |
| C | -4.150007 | -0.366339 | 31.886384 |
| C | -3.410882 | 2.392310  | 31.886385 |
| C | -2.392310 | 3.410881  | 31.886385 |
| C | 0.366339  | 4.150007  | 31.886385 |
| C | 1.757743  | 3.777200  | 31.886384 |
| C | 3.777200  | 1.757743  | 31.886384 |
| C | 4.150007  | 0.366339  | 31.886385 |
| C | 3.410881  | -2.392310 | 31.886385 |
| C | 2.392310  | -3.410882 | 31.886385 |
| C | -0.366339 | -4.150007 | 31.886384 |
| C | -1.757743 | -3.777200 | 31.886384 |
| C | -4.156958 | 0.363205  | 33.136693 |
| C | -3.781656 | 1.763953  | 33.136694 |
| C | -1.763954 | 3.781656  | 33.136694 |
| C | -0.363205 | 4.156958  | 33.136693 |
| C | 2.393053  | 3.418465  | 33.136691 |
| C | 3.418465  | 2.393053  | 33.136691 |
| C | 4.156958  | -0.363205 | 33.136693 |
| C | 3.781656  | -1.763954 | 33.136694 |
| C | 1.763953  | -3.781656 | 33.136694 |
| C | 0.363205  | -4.156958 | 33.136693 |
| C | -2.393053 | -3.418465 | 33.136691 |
| C | -3.418465 | -2.393053 | 33.136691 |
| C | -3.415146 | 2.392857  | 34.382574 |
| C | -2.392858 | 3.415145  | 34.382574 |
| C | 0.364681  | 4.153969  | 34.382571 |
| C | 1.761161  | 3.779803  | 34.382569 |
| C | 3.779803  | 1.761161  | 34.382569 |
| C | 4.153969  | 0.364681  | 34.382571 |
| C | 3.415145  | -2.392858 | 34.382574 |
| C | 2.392857  | -3.415146 | 34.382574 |
| C | -0.364682 | -4.153970 | 34.382571 |
| C | -1.761162 | -3.779804 | 34.382569 |
| C | -3.779804 | -1.761162 | 34.382569 |
| C | -4.153970 | -0.364682 | 34.382571 |
| C | -1.756522 | 3.776855  | 35.636905 |
| C | -0.367237 | 4.149087  | 35.636903 |
| C | 2.392608  | 3.409627  | 35.636900 |
| C | 3.409627  | 2.392608  | 35.636900 |
| C | 4.149087  | -0.367237 | 35.636903 |
| C | 3.776855  | -1.756522 | 35.636905 |
| C | 1.756522  | -3.776856 | 35.636905 |
| C | 0.367236  | -4.149087 | 35.636903 |
| C | -2.392609 | -3.409627 | 35.636899 |
| C | -3.409627 | -2.392609 | 35.636899 |
| C | -4.149087 | 0.367236  | 35.636903 |
| C | -3.776856 | 1.756522  | 35.636905 |
| C | 0.363114  | 4.155921  | 36.889399 |
| C | 1.763497  | 3.780709  | 36.889396 |
| C | 3.780709  | 1.763497  | 36.889396 |



|   |           |           |            |
|---|-----------|-----------|------------|
| C | 4.155921  | 0.363114  | 36.889399  |
| C | 3.417617  | -2.392472 | 36.889403  |
| C | 2.392472  | -3.417617 | 36.889403  |
| C | -0.363115 | -4.155921 | 36.889399  |
| C | -1.763497 | -3.780709 | 36.889395  |
| C | -3.780709 | -1.763497 | 36.889395  |
| C | -4.155921 | -0.363115 | 36.889399  |
| C | -3.417617 | 2.392472  | 36.889403  |
| C | -2.392472 | 3.417617  | 36.889403  |
| C | 2.389408  | 3.412820  | 38.133002  |
| C | 3.412820  | 2.389408  | 38.133002  |
| C | 4.150252  | -0.362868 | 38.133009  |
| C | 3.775672  | -1.760882 | 38.133012  |
| C | 1.760882  | -3.775673 | 38.133012  |
| C | 0.362868  | -4.150252 | 38.133009  |
| C | -2.389408 | -3.412820 | 38.133002  |
| C | -3.412820 | -2.389408 | 38.133002  |
| C | -4.150252 | 0.362868  | 38.133009  |
| C | -3.775673 | 1.760882  | 38.133012  |
| C | -1.760882 | 3.775672  | 38.133012  |
| C | -0.362868 | 4.150252  | 38.133009  |
| C | 3.762577  | 1.748496  | 39.386882  |
| C | 4.132729  | 0.367038  | 39.386892  |
| C | 3.395543  | -2.384251 | 39.386897  |
| C | 2.384251  | -3.395543 | 39.386897  |
| C | -0.367039 | -4.132730 | 39.386892  |
| C | -1.748497 | -3.762578 | 39.386882  |
| C | -3.762578 | -1.748497 | 39.386882  |
| C | -4.132730 | -0.367039 | 39.386892  |
| C | -3.395543 | 2.384251  | 39.386897  |
| C | -2.384251 | 3.395543  | 39.386897  |
| C | 0.367038  | 4.132729  | 39.386892  |
| C | 1.748496  | 3.762577  | 39.386882  |
| C | 4.146041  | -0.359320 | 40.648094  |
| C | 3.770246  | -1.761828 | 40.648091  |
| C | 1.761827  | -3.770246 | 40.648091  |
| C | 0.359320  | -4.146041 | 40.648093  |
| C | -2.384244 | -3.410945 | 40.648069  |
| C | -3.410945 | -2.384244 | 40.648069  |
| C | -4.146041 | 0.359320  | 40.648093  |
| C | -3.770246 | 1.761827  | 40.648091  |
| C | -1.761828 | 3.770246  | 40.648091  |
| C | -0.359320 | 4.146041  | 40.648094  |
| C | 2.384244  | 3.410944  | 40.648069  |
| C | 3.410944  | 2.384244  | 40.648069  |
| C | 3.452008  | -2.412968 | 41.888406  |
| C | 2.412967  | -3.452009 | 41.888406  |
| C | -0.363695 | -4.195965 | 41.888405  |
| C | -1.783068 | -3.815699 | 41.888382  |
| C | -3.815699 | -1.783068 | 41.888382  |
| C | -4.195965 | -0.363695 | 41.888405  |
| C | -3.452009 | 2.412967  | 41.888406  |
| C | -2.412968 | 3.452008  | 41.888406  |
| C | 0.363694  | 4.195964  | 41.888405  |
| C | 1.783067  | 3.815699  | 41.888382  |
| C | 3.815699  | 1.783067  | 41.888382  |
| C | 4.195964  | 0.363694  | 41.888405  |
| C | 1.758524  | -3.889462 | 43.104010  |
| C | 0.421774  | -4.247605 | 43.104012  |
| C | -2.489214 | -3.467774 | 43.103976  |
| C | -3.467774 | -2.489214 | 43.103976  |
| C | -4.247605 | 0.421774  | 43.104012  |
| C | -3.889462 | 1.758524  | 43.104010  |
| C | -1.758524 | 3.889461  | 43.104011  |
| C | -0.421775 | 4.247604  | 43.104012  |
| C | 2.489214  | 3.467773  | 43.103977  |
| C | 3.467773  | 2.489214  | 43.103977  |
| C | 4.247604  | -0.421775 | 43.104012  |
| C | 3.889461  | -1.758524 | 43.104011  |
| H | -3.812585 | -2.291663 | -44.060316 |

|   |           |           |            |
|---|-----------|-----------|------------|
| H | -4.447583 | 0.078375  | -44.060318 |
| H | -3.891099 | 2.156097  | -44.060269 |
| H | -2.156098 | 3.891098  | -44.060269 |
| H | -0.078376 | 4.447582  | -44.060318 |
| H | 2.291662  | 3.812584  | -44.060316 |
| H | 3.812584  | 2.291662  | -44.060316 |
| H | 4.447582  | -0.078376 | -44.060318 |
| H | 3.891098  | -2.156098 | -44.060269 |
| H | 2.156097  | -3.891099 | -44.060269 |
| H | 0.078375  | -4.447583 | -44.060318 |
| H | -2.291663 | -3.812585 | -44.060316 |
| H | 2.291662  | -3.812585 | 44.060316  |
| H | -0.078376 | -4.447583 | 44.060318  |
| H | -2.156098 | -3.891099 | 44.060269  |
| H | -3.891099 | -2.156098 | 44.060269  |
| H | -4.447583 | -0.078376 | 44.060318  |
| H | -3.812585 | 2.291662  | 44.060316  |
| H | -2.291663 | 3.812584  | 44.060316  |
| H | 0.078375  | 4.447582  | 44.060318  |
| H | 2.156097  | 3.891098  | 44.060269  |
| H | 3.891098  | 2.156097  | 44.060269  |
| H | 4.447582  | 0.078375  | 44.060318  |
| H | 3.812584  | -2.291663 | 44.060316  |

Nanotube (6,6) u35v6s  
B3LYP/STO-3G Energy: -32090.071140

|   |           |           |           |
|---|-----------|-----------|-----------|
| C | -3.890526 | 1.759734  | 43.712492 |
| C | -4.249134 | 0.421252  | 43.712493 |
| C | -3.469368 | -2.489540 | 43.712455 |
| C | -2.489539 | -3.469368 | 43.712455 |
| C | 0.421252  | -4.249134 | 43.712493 |
| C | 1.759734  | -3.890526 | 43.712492 |
| C | 3.890526  | -1.759734 | 43.712492 |
| C | 4.249134  | -0.421252 | 43.712493 |
| C | 3.469368  | 2.489539  | 43.712456 |
| C | 2.489539  | 3.469368  | 43.712456 |
| C | -0.421252 | 4.249134  | 43.712493 |
| C | -1.759734 | 3.890526  | 43.712492 |
| C | -4.198751 | -0.362830 | 42.498776 |
| C | -3.817681 | -1.785216 | 42.498752 |
| C | -1.785216 | -3.817681 | 42.498752 |
| C | -0.362830 | -4.198751 | 42.498776 |
| C | 2.413605  | -3.454851 | 42.498778 |
| C | 3.454851  | -2.413605 | 42.498778 |
| C | 4.198751  | 0.362830  | 42.498776 |
| C | 3.817680  | 1.785216  | 42.498752 |
| C | 1.785216  | 3.817680  | 42.498752 |
| C | 0.362830  | 4.198751  | 42.498776 |
| C | -2.413605 | 3.454851  | 42.498778 |
| C | -3.454851 | 2.413605  | 42.498778 |
| C | -3.410603 | -2.384490 | 41.258667 |
| C | -2.384490 | -3.410603 | 41.258667 |
| C | 0.359701  | -4.145866 | 41.258693 |
| C | 1.761406  | -3.770284 | 41.258691 |
| C | 3.770284  | -1.761406 | 41.258691 |
| C | 4.145866  | -0.359701 | 41.258693 |
| C | 3.410603  | 2.384489  | 41.258668 |
| C | 2.384489  | 3.410603  | 41.258668 |
| C | -0.359701 | 4.145866  | 41.258693 |
| C | -1.761406 | 3.770284  | 41.258691 |
| C | -3.770284 | 1.761406  | 41.258691 |
| C | -4.145866 | 0.359701  | 41.258693 |
| C | -1.749566 | -3.763659 | 39.996314 |
| C | -0.366655 | -4.134200 | 39.996324 |
| C | 2.384650  | -3.397006 | 39.996330 |
| C | 3.397006  | -2.384650 | 39.996330 |
| C | 4.134200  | 0.366655  | 39.996324 |

|   |           |           |           |
|---|-----------|-----------|-----------|
| C | 3.763659  | 1.749566  | 39.996314 |
| C | 1.749566  | 3.763659  | 39.996314 |
| C | 0.366655  | 4.134200  | 39.996324 |
| C | -2.384650 | 3.397006  | 39.996330 |
| C | -3.397006 | 2.384650  | 39.996330 |
| C | -4.134200 | -0.366655 | 39.996324 |
| C | -3.763659 | -1.749567 | 39.996314 |
| C | 0.361917  | -4.153169 | 38.744724 |
| C | 1.763163  | -3.777723 | 38.744728 |
| C | 3.777722  | -1.763163 | 38.744728 |
| C | 4.153169  | -0.361917 | 38.744724 |
| C | 3.415823  | 2.390045  | 38.744717 |
| C | 2.390045  | 3.415823  | 38.744717 |
| C | -0.361917 | 4.153169  | 38.744724 |
| C | -1.763163 | 3.777722  | 38.744728 |
| C | -3.777723 | 1.763163  | 38.744728 |
| C | -4.153169 | 0.361917  | 38.744724 |
| C | -3.415823 | -2.390045 | 38.744717 |
| C | -2.390045 | -3.415823 | 38.744717 |
| C | 2.392753  | -3.417240 | 37.501612 |
| C | 3.417240  | -2.392753 | 37.501612 |
| C | 4.155739  | 0.363547  | 37.501607 |
| C | 3.780767  | 1.763031  | 37.501604 |
| C | 1.763031  | 3.780767  | 37.501604 |
| C | 0.363547  | 4.155739  | 37.501607 |
| C | -2.392753 | 3.417240  | 37.501612 |
| C | -3.417240 | 2.392753  | 37.501612 |
| C | -4.155739 | -0.363547 | 37.501607 |
| C | -3.780767 | -1.763031 | 37.501603 |
| C | -1.763031 | -3.780767 | 37.501603 |
| C | -0.363547 | -4.155739 | 37.501607 |
| C | 3.777867  | -1.757341 | 36.247455 |
| C | 4.150374  | -0.367033 | 36.247452 |
| C | 3.410843  | 2.393075  | 36.247449 |
| C | 2.393075  | 3.410843  | 36.247449 |
| C | -0.367033 | 4.150374  | 36.247452 |
| C | -1.757341 | 3.777867  | 36.247455 |
| C | -3.777868 | 1.757341  | 36.247455 |
| C | -4.150374 | 0.367033  | 36.247452 |
| C | -3.410843 | -2.393075 | 36.247448 |
| C | -2.393075 | -3.410843 | 36.247448 |
| C | 0.367033  | -4.150374 | 36.247452 |
| C | 1.757341  | -3.777868 | 36.247455 |
| C | 4.157377  | 0.363500  | 34.995397 |
| C | 3.782163  | 1.763890  | 34.995395 |
| C | 1.763890  | 3.782163  | 34.995395 |
| C | 0.363500  | 4.157377  | 34.995397 |
| C | -2.393537 | 3.418687  | 34.995400 |
| C | -3.418688 | 2.393537  | 34.995400 |
| C | -4.157377 | -0.363500 | 34.995397 |
| C | -3.782163 | -1.763890 | 34.995395 |
| C | -1.763890 | -3.782163 | 34.995395 |
| C | -0.363500 | -4.157377 | 34.995397 |
| C | 2.393537  | -3.418688 | 34.995400 |
| C | 3.418688  | -2.393537 | 34.995400 |
| C | 3.418149  | 2.393403  | 33.750584 |
| C | 2.393403  | 3.418149  | 33.750584 |
| C | -0.363666 | 4.156862  | 33.750586 |
| C | -1.763506 | 3.781802  | 33.750587 |
| C | -3.781803 | 1.763505  | 33.750587 |
| C | -4.156862 | 0.363666  | 33.750586 |
| C | -3.418149 | -2.393403 | 33.750583 |
| C | -2.393403 | -3.418149 | 33.750583 |
| C | 0.363666  | -4.156862 | 33.750586 |
| C | 1.763506  | -3.781803 | 33.750587 |
| C | 3.781802  | -1.763506 | 33.750587 |
| C | 4.156862  | -0.363666 | 33.750586 |
| C | 1.758109  | 3.777899  | 32.498145 |
| C | 0.366372  | 4.150796  | 32.498146 |
| C | -2.392732 | 3.411547  | 32.498147 |

|   |           |           |           |
|---|-----------|-----------|-----------|
| C | -3.411547 | 2.392732  | 32.498147 |
| C | -4.150796 | -0.366372 | 32.498146 |
| C | -3.777900 | -1.758109 | 32.498145 |
| C | -1.758109 | -3.777900 | 32.498145 |
| C | -0.366372 | -4.150796 | 32.498146 |
| C | 2.392732  | -3.411547 | 32.498147 |
| C | 3.411547  | -2.392732 | 32.498147 |
| C | 4.150796  | 0.366372  | 32.498146 |
| C | 3.777899  | 1.758109  | 32.498145 |
| C | -0.363840 | 4.155964  | 31.245767 |
| C | -1.762904 | 3.781112  | 31.245767 |
| C | -3.781112 | 1.762904  | 31.245767 |
| C | -4.155965 | 0.363840  | 31.245767 |
| C | -3.417286 | -2.393107 | 31.245767 |
| C | -2.393107 | -3.417285 | 31.245767 |
| C | 0.363840  | -4.155965 | 31.245767 |
| C | 1.762904  | -3.781112 | 31.245767 |
| C | 3.781112  | -1.762904 | 31.245767 |
| C | 4.155964  | -0.363840 | 31.245767 |
| C | 3.417286  | 2.393107  | 31.245767 |
| C | 2.393107  | 3.417286  | 31.245767 |
| C | -2.393262 | 3.417984  | 30.000116 |
| C | -3.417984 | 2.393262  | 30.000116 |
| C | -4.156632 | -0.363615 | 30.000116 |
| C | -3.781575 | -1.763419 | 30.000116 |
| C | -1.763419 | -3.781575 | 30.000116 |
| C | -0.363615 | -4.156632 | 30.000116 |
| C | 2.393262  | -3.417984 | 30.000116 |
| C | 3.417984  | -2.393262 | 30.000116 |
| C | 4.156632  | 0.363615  | 30.000117 |
| C | 3.781575  | 1.763419  | 30.000116 |
| C | 1.763419  | 3.781575  | 30.000116 |
| C | 0.363615  | 4.156632  | 30.000117 |
| C | -3.778208 | 1.758611  | 28.748560 |
| C | -4.151305 | 0.366102  | 28.748560 |
| C | -3.412115 | -2.392736 | 28.748561 |
| C | -2.392736 | -3.412115 | 28.748560 |
| C | 0.366102  | -4.151305 | 28.748560 |
| C | 1.758611  | -3.778208 | 28.748560 |
| C | 3.778208  | -1.758611 | 28.748560 |
| C | 4.151305  | -0.366102 | 28.748560 |
| C | 3.412116  | 2.392737  | 28.748560 |
| C | 2.392737  | 3.412116  | 28.748560 |
| C | -0.366102 | 4.151305  | 28.748560 |
| C | -1.758611 | 3.778208  | 28.748560 |
| C | -4.155484 | -0.364105 | 27.496065 |
| C | -3.780826 | -1.762422 | 27.496065 |
| C | -1.762422 | -3.780826 | 27.496065 |
| C | -0.364105 | -4.155484 | 27.496065 |
| C | 2.393110  | -3.416743 | 27.496065 |
| C | 3.416743  | -2.393110 | 27.496065 |
| C | 4.155484  | 0.364105  | 27.496065 |
| C | 3.780826  | 1.762422  | 27.496065 |
| C | 1.762422  | 3.780826  | 27.496065 |
| C | 0.364105  | 4.155484  | 27.496065 |
| C | -2.393110 | 3.416743  | 27.496065 |
| C | -3.416743 | 2.393110  | 27.496065 |
| C | -3.418061 | -2.393286 | 26.249893 |
| C | -2.393286 | -3.418061 | 26.249893 |
| C | 0.363605  | -4.156722 | 26.249892 |
| C | 1.763484  | -3.781650 | 26.249892 |
| C | 3.781650  | -1.763484 | 26.249893 |
| C | 4.156722  | -0.363605 | 26.249893 |
| C | 3.418061  | 2.393286  | 26.249893 |
| C | 2.393286  | 3.418061  | 26.249893 |
| C | -0.363605 | 4.156722  | 26.249893 |
| C | -1.763483 | 3.781650  | 26.249893 |
| C | -3.781650 | 1.763483  | 26.249892 |
| C | -4.156722 | 0.363605  | 26.249893 |
| C | -1.758959 | -3.778455 | 24.998951 |

|   |           |           |           |
|---|-----------|-----------|-----------|
| C | -0.365918 | -4.151698 | 24.998951 |
| C | 2.392785  | -3.412553 | 24.998950 |
| C | 3.412554  | -2.392785 | 24.998950 |
| C | 4.151698  | 0.365918  | 24.998951 |
| C | 3.778455  | 1.758959  | 24.998951 |
| C | 1.758959  | 3.778455  | 24.998951 |
| C | 0.365918  | 4.151698  | 24.998951 |
| C | -2.392785 | 3.412554  | 24.998950 |
| C | -3.412554 | 2.392785  | 24.998950 |
| C | -4.151698 | -0.365918 | 24.998951 |
| C | -3.778455 | -1.758959 | 24.998951 |
| C | 0.364294  | -4.155084 | 23.746364 |
| C | 1.762066  | -3.780576 | 23.746363 |
| C | 3.780576  | -1.762066 | 23.746363 |
| C | 4.155084  | -0.364294 | 23.746364 |
| C | 3.416298  | 2.393065  | 23.746364 |
| C | 2.393065  | 3.416298  | 23.746364 |
| C | -0.364294 | 4.155084  | 23.746364 |
| C | -1.762066 | 3.780576  | 23.746363 |
| C | -3.780576 | 1.762066  | 23.746363 |
| C | -4.155084 | 0.364294  | 23.746364 |
| C | -3.416298 | -2.393065 | 23.746364 |
| C | -2.393065 | -3.416298 | 23.746364 |
| C | 2.393286  | -3.418134 | 22.499783 |
| C | 3.418135  | -2.393285 | 22.499783 |
| C | 4.156779  | 0.363563  | 22.499783 |
| C | 3.781677  | 1.763542  | 22.499784 |
| C | 1.763542  | 3.781677  | 22.499784 |
| C | 0.363563  | 4.156779  | 22.499783 |
| C | -2.393285 | 3.418134  | 22.499783 |
| C | -3.418134 | 2.393285  | 22.499783 |
| C | -4.156779 | -0.363563 | 22.499783 |
| C | -3.781677 | -1.763542 | 22.499783 |
| C | -1.763542 | -3.781677 | 22.499783 |
| C | -0.363563 | -4.156778 | 22.499783 |
| C | 3.778653  | -1.759236 | 21.249332 |
| C | 4.152005  | -0.365781 | 21.249332 |
| C | 3.412886  | 2.392814  | 21.249332 |
| C | 2.392814  | 3.412886  | 21.249332 |
| C | -0.365781 | 4.152005  | 21.249332 |
| C | -1.759236 | 3.778653  | 21.249332 |
| C | -3.778653 | 1.759236  | 21.249332 |
| C | -4.152005 | 0.365781  | 21.249332 |
| C | -3.412886 | -2.392814 | 21.249332 |
| C | -2.392814 | -3.412886 | 21.249332 |
| C | 0.365781  | -4.152005 | 21.249332 |
| C | 1.759236  | -3.778653 | 21.249332 |
| C | 4.154755  | 0.364462  | 19.996659 |
| C | 3.780374  | 1.761752  | 19.996659 |
| C | 1.761752  | 3.780374  | 19.996659 |
| C | 0.364462  | 4.154755  | 19.996659 |
| C | -2.393050 | 3.415930  | 19.996659 |
| C | -3.415930 | 2.393050  | 19.996659 |
| C | -4.154755 | -0.364462 | 19.996659 |
| C | -3.780374 | -1.761752 | 19.996659 |
| C | -1.761752 | -3.780374 | 19.996659 |
| C | -0.364462 | -4.154755 | 19.996659 |
| C | 2.393050  | -3.415930 | 19.996659 |
| C | 3.415930  | -2.393050 | 19.996659 |
| C | 3.418202  | 2.393296  | 18.749742 |
| C | 2.393296  | 3.418202  | 18.749742 |
| C | -0.363541 | 4.156845  | 18.749742 |
| C | -1.763598 | 3.781724  | 18.749742 |
| C | -3.781724 | 1.763598  | 18.749742 |
| C | -4.156845 | 0.363541  | 18.749742 |
| C | -3.418202 | -2.393296 | 18.749742 |
| C | -2.393296 | -3.418202 | 18.749742 |
| C | 0.363541  | -4.156845 | 18.749742 |
| C | 1.763598  | -3.781724 | 18.749742 |
| C | 3.781724  | -1.763598 | 18.749742 |

|   |           |           |           |
|---|-----------|-----------|-----------|
| C | 4.156845  | -0.363541 | 18.749742 |
| C | 1.759475  | 3.778829  | 17.499705 |
| C | 0.365661  | 4.152279  | 17.499705 |
| C | -2.392849 | 3.413184  | 17.499704 |
| C | -3.413184 | 2.392849  | 17.499705 |
| C | -4.152279 | -0.365661 | 17.499705 |
| C | -3.778830 | -1.759475 | 17.499705 |
| C | -1.759475 | -3.778829 | 17.499705 |
| C | -0.365661 | -4.152279 | 17.499705 |
| C | 2.392849  | -3.413184 | 17.499705 |
| C | 3.413184  | -2.392849 | 17.499704 |
| C | 4.152279  | 0.365661  | 17.499705 |
| C | 3.778829  | 1.759475  | 17.499705 |
| C | -0.364610 | 4.154475  | 16.246960 |
| C | -1.761484 | 3.780206  | 16.246960 |
| C | -3.780206 | 1.761484  | 16.246960 |
| C | -4.154475 | 0.364610  | 16.246960 |
| C | -3.415612 | -2.393037 | 16.246961 |
| C | -2.393037 | -3.415612 | 16.246961 |
| C | 0.364610  | -4.154475 | 16.246960 |
| C | 1.761484  | -3.780206 | 16.246960 |
| C | 3.780206  | -1.761484 | 16.246960 |
| C | 4.154475  | -0.364610 | 16.246960 |
| C | 3.415612  | 2.393037  | 16.246961 |
| C | 2.393037  | 3.415612  | 16.246961 |
| C | -2.393310 | 3.418272  | 14.999739 |
| C | -3.418272 | 2.393310  | 14.999739 |
| C | -4.156913 | -0.363517 | 14.999740 |
| C | -3.781770 | -1.763651 | 14.999740 |
| C | -1.763651 | -3.781770 | 14.999740 |
| C | -0.363517 | -4.156913 | 14.999740 |
| C | 2.393310  | -3.418272 | 14.999739 |
| C | 3.418272  | -2.393310 | 14.999739 |
| C | 4.156913  | 0.363517  | 14.999740 |
| C | 3.781771  | 1.763651  | 14.999740 |
| C | 1.763651  | 3.781770  | 14.999740 |
| C | 0.363517  | 4.156913  | 14.999740 |
| C | -3.778998 | 1.759703  | 13.750076 |
| C | -4.152539 | 0.365548  | 13.750076 |
| C | -3.413465 | -2.392881 | 13.750076 |
| C | -2.392881 | -3.413465 | 13.750076 |
| C | 0.365548  | -4.152539 | 13.750076 |
| C | 1.759703  | -3.778998 | 13.750076 |
| C | 3.778998  | -1.759702 | 13.750076 |
| C | 4.152539  | -0.365548 | 13.750076 |
| C | 3.413465  | 2.392881  | 13.750076 |
| C | 2.392881  | 3.413465  | 13.750076 |
| C | -0.365548 | 4.152539  | 13.750076 |
| C | -1.759702 | 3.778998  | 13.750076 |
| C | -4.154217 | -0.364746 | 12.497277 |
| C | -3.780051 | -1.761238 | 12.497277 |
| C | -1.761238 | -3.780051 | 12.497277 |
| C | -0.364746 | -4.154217 | 12.497277 |
| C | 2.393026  | -3.415321 | 12.497277 |
| C | 3.415321  | -2.393026 | 12.497277 |
| C | 4.154218  | 0.364747  | 12.497277 |
| C | 3.780051  | 1.761238  | 12.497277 |
| C | 1.761238  | 3.780051  | 12.497277 |
| C | 0.364747  | 4.154218  | 12.497277 |
| C | -2.393026 | 3.415321  | 12.497277 |
| C | -3.415321 | 2.393026  | 12.497277 |
| C | -3.418330 | -2.393322 | 11.249767 |
| C | -2.393322 | -3.418330 | 11.249767 |
| C | 0.363499  | -4.156968 | 11.249767 |
| C | 1.763694  | -3.781809 | 11.249767 |
| C | 3.781809  | -1.763694 | 11.249767 |
| C | 4.156968  | -0.363498 | 11.249767 |
| C | 3.418330  | 2.393322  | 11.249767 |
| C | 2.393322  | 3.418330  | 11.249767 |
| C | -0.363498 | 4.156968  | 11.249767 |

|   |           |           |           |
|---|-----------|-----------|-----------|
| C | -1.763694 | 3.781809  | 11.249767 |
| C | -3.781809 | 1.763694  | 11.249767 |
| C | -4.156968 | 0.363499  | 11.249767 |
| C | -1.759919 | -3.779154 | 10.000453 |
| C | -0.365440 | -4.152782 | 10.000453 |
| C | 2.392908  | -3.413730 | 10.000453 |
| C | 3.413730  | -2.392907 | 10.000453 |
| C | 4.152782  | 0.365440  | 10.000453 |
| C | 3.779155  | 1.759919  | 10.000454 |
| C | 1.759919  | 3.779155  | 10.000454 |
| C | 0.365440  | 4.152782  | 10.000453 |
| C | -2.392907 | 3.413730  | 10.000453 |
| C | -3.413730 | 2.392908  | 10.000453 |
| C | -4.152782 | -0.365440 | 10.000453 |
| C | -3.779154 | -1.759919 | 10.000453 |
| C | 0.364873  | -4.153964 | 8.747614  |
| C | 1.761000  | -3.779894 | 8.747614  |
| C | 3.779894  | -1.761000 | 8.747614  |
| C | 4.153964  | -0.364872 | 8.747614  |
| C | 3.415038  | 2.393009  | 8.747614  |
| C | 2.393009  | 3.415038  | 8.747614  |
| C | -0.364872 | 4.153963  | 8.747614  |
| C | -1.761000 | 3.779894  | 8.747614  |
| C | -3.779894 | 1.761000  | 8.747614  |
| C | -4.153964 | 0.364873  | 8.747614  |
| C | -3.415038 | -2.393009 | 8.747614  |
| C | -2.393009 | -3.415038 | 8.747614  |
| C | 2.393325  | -3.418364 | 7.499822  |
| C | 3.418364  | -2.393325 | 7.499822  |
| C | 4.157000  | 0.363485  | 7.499822  |
| C | 3.781830  | 1.763724  | 7.499822  |
| C | 1.763724  | 3.781830  | 7.499822  |
| C | 0.363485  | 4.157000  | 7.499822  |
| C | -2.393325 | 3.418364  | 7.499822  |
| C | -3.418364 | 2.393325  | 7.499822  |
| C | -4.157000 | -0.363484 | 7.499822  |
| C | -3.781830 | -1.763724 | 7.499822  |
| C | -1.763724 | -3.781830 | 7.499822  |
| C | -0.363484 | -4.157000 | 7.499822  |
| C | 3.779296  | -1.760126 | 6.250841  |
| C | 4.153008  | -0.365330 | 6.250841  |
| C | 3.413981  | 2.392928  | 6.250841  |
| C | 2.392928  | 3.413981  | 6.250841  |
| C | -0.365330 | 4.153008  | 6.250841  |
| C | -1.760126 | 3.779296  | 6.250841  |
| C | -3.779296 | 1.760126  | 6.250841  |
| C | -4.153008 | 0.365330  | 6.250841  |
| C | -3.413981 | -2.392928 | 6.250841  |
| C | -2.392928 | -3.413981 | 6.250841  |
| C | 0.365330  | -4.153008 | 6.250841  |
| C | 1.760126  | -3.779296 | 6.250841  |
| C | 4.153709  | 0.364994  | 4.997976  |
| C | 3.779735  | 1.760770  | 4.997976  |
| C | 1.760770  | 3.779735  | 4.997976  |
| C | 0.364994  | 4.153709  | 4.997976  |
| C | -2.392985 | 3.414756  | 4.997976  |
| C | -3.414756 | 2.392985  | 4.997976  |
| C | -4.153709 | -0.364994 | 4.997976  |
| C | -3.779734 | -1.760770 | 4.997976  |
| C | -1.760770 | -3.779734 | 4.997976  |
| C | -0.364994 | -4.153709 | 4.997976  |
| C | 2.392985  | -3.414756 | 4.997976  |
| C | 3.414756  | -2.392985 | 4.997976  |
| C | 3.418379  | 2.393323  | 3.749903  |
| C | 2.393323  | 3.418379  | 3.749903  |
| C | -0.363474 | 4.157010  | 3.749903  |
| C | -1.763736 | 3.781833  | 3.749903  |
| C | -3.781833 | 1.763736  | 3.749903  |
| C | -4.157010 | 0.363474  | 3.749903  |
| C | -3.418379 | -2.393323 | 3.749903  |

|   |           |           |           |
|---|-----------|-----------|-----------|
| C | -2.393323 | -3.418379 | 3.749903  |
| C | 0.363474  | -4.157010 | 3.749903  |
| C | 1.763736  | -3.781834 | 3.749903  |
| C | 3.781833  | -1.763736 | 3.749903  |
| C | 4.157010  | -0.363474 | 3.749903  |
| C | 1.760334  | 3.779433  | 2.501238  |
| C | 0.365220  | 4.153230  | 2.501238  |
| C | -2.392942 | 3.414228  | 2.501238  |
| C | -3.414228 | 2.392942  | 2.501238  |
| C | -4.153230 | -0.365220 | 2.501238  |
| C | -3.779433 | -1.760333 | 2.501238  |
| C | -1.760333 | -3.779433 | 2.501238  |
| C | -0.365220 | -4.153230 | 2.501238  |
| C | 2.392942  | -3.414228 | 2.501238  |
| C | 3.414228  | -2.392942 | 2.501238  |
| C | 4.153230  | 0.365220  | 2.501238  |
| C | 3.779433  | 1.760334  | 2.501238  |
| C | -0.365108 | 4.153462  | 1.248363  |
| C | -1.760546 | 3.779578  | 1.248363  |
| C | -3.779578 | 1.760546  | 1.248363  |
| C | -4.153462 | 0.365108  | 1.248363  |
| C | -3.414486 | -2.392962 | 1.248363  |
| C | -2.392962 | -3.414486 | 1.248363  |
| C | 0.365108  | -4.153462 | 1.248363  |
| C | 1.760546  | -3.779578 | 1.248363  |
| C | 3.779578  | -1.760546 | 1.248363  |
| C | 4.153462  | -0.365108 | 1.248363  |
| C | 3.414486  | 2.392962  | 1.248363  |
| C | 2.392962  | 3.414486  | 1.248363  |
| C | -2.393319 | 3.418381  | 0.000000  |
| C | -3.418381 | 2.393319  | 0.000000  |
| C | -4.157012 | -0.363471 | 0.000000  |
| C | -3.781833 | -1.763741 | 0.000000  |
| C | -1.763741 | -3.781833 | 0.000000  |
| C | -0.363471 | -4.157012 | 0.000000  |
| C | 2.393319  | -3.418381 | 0.000000  |
| C | 3.418381  | -2.393319 | 0.000000  |
| C | 4.157012  | 0.363471  | 0.000000  |
| C | 3.781833  | 1.763741  | 0.000000  |
| C | 1.763741  | 3.781833  | 0.000000  |
| C | 0.363471  | 4.157012  | 0.000000  |
| C | -3.779578 | 1.760546  | -1.248363 |
| C | -4.153462 | 0.365108  | -1.248363 |
| C | -3.414486 | -2.392962 | -1.248363 |
| C | -2.392962 | -3.414486 | -1.248363 |
| C | 0.365108  | -4.153462 | -1.248363 |
| C | 1.760546  | -3.779578 | -1.248363 |
| C | 3.779578  | -1.760546 | -1.248363 |
| C | 4.153462  | -0.365108 | -1.248363 |
| C | 3.414486  | 2.392962  | -1.248363 |
| C | 2.392962  | 3.414486  | -1.248363 |
| C | -0.365108 | 4.153462  | -1.248363 |
| C | -1.760546 | 3.779578  | -1.248363 |
| C | -4.153230 | -0.365220 | -2.501238 |
| C | -3.779433 | -1.760333 | -2.501238 |
| C | -1.760333 | -3.779433 | -2.501238 |
| C | -0.365220 | -4.153230 | -2.501238 |
| C | 2.392942  | -3.414228 | -2.501238 |
| C | 3.414228  | -2.392942 | -2.501238 |
| C | 4.153230  | 0.365220  | -2.501238 |
| C | 3.779433  | 1.760333  | -2.501238 |
| C | 1.760333  | 3.779433  | -2.501238 |
| C | 0.365220  | 4.153230  | -2.501238 |
| C | -2.392942 | 3.414228  | -2.501238 |
| C | -3.414228 | 2.392942  | -2.501238 |
| C | -3.418379 | -2.393322 | -3.749903 |
| C | -2.393322 | -3.418379 | -3.749903 |
| C | 0.363474  | -4.157010 | -3.749903 |
| C | 1.763736  | -3.781834 | -3.749903 |
| C | 3.781834  | -1.763736 | -3.749903 |



|   |           |           |            |
|---|-----------|-----------|------------|
| C | 4.157010  | -0.363474 | -3.749903  |
| C | 3.418379  | 2.393323  | -3.749903  |
| C | 2.393323  | 3.418379  | -3.749903  |
| C | -0.363474 | 4.157010  | -3.749903  |
| C | -1.763736 | 3.781834  | -3.749903  |
| C | -3.781834 | 1.763736  | -3.749903  |
| C | -4.157010 | 0.363474  | -3.749903  |
| C | -1.760769 | -3.779734 | -4.997976  |
| C | -0.364994 | -4.153709 | -4.997976  |
| C | 2.392985  | -3.414757 | -4.997976  |
| C | 3.414757  | -2.392985 | -4.997976  |
| C | 4.153709  | 0.364994  | -4.997976  |
| C | 3.779734  | 1.760769  | -4.997976  |
| C | 1.760769  | 3.779734  | -4.997976  |
| C | 0.364994  | 4.153709  | -4.997976  |
| C | -2.392985 | 3.414757  | -4.997976  |
| C | -3.414757 | 2.392985  | -4.997976  |
| C | -4.153709 | -0.364994 | -4.997976  |
| C | -3.779734 | -1.760769 | -4.997976  |
| C | 0.365330  | -4.153008 | -6.250841  |
| C | 1.760126  | -3.779296 | -6.250841  |
| C | 3.779296  | -1.760126 | -6.250841  |
| C | 4.153008  | -0.365330 | -6.250841  |
| C | 3.413981  | 2.392928  | -6.250841  |
| C | 2.392927  | 3.413981  | -6.250841  |
| C | -0.365330 | 4.153008  | -6.250841  |
| C | -1.760126 | 3.779296  | -6.250841  |
| C | -3.779296 | 1.760126  | -6.250841  |
| C | -4.153008 | 0.365330  | -6.250841  |
| C | -3.413981 | -2.392927 | -6.250841  |
| C | -2.392927 | -3.413981 | -6.250841  |
| C | 2.393325  | -3.418364 | -7.499822  |
| C | 3.418364  | -2.393325 | -7.499822  |
| C | 4.157000  | 0.363484  | -7.499822  |
| C | 3.781829  | 1.763723  | -7.499822  |
| C | 1.763723  | 3.781829  | -7.499822  |
| C | 0.363484  | 4.157000  | -7.499822  |
| C | -2.393325 | 3.418364  | -7.499822  |
| C | -3.418364 | 2.393325  | -7.499822  |
| C | -4.157000 | -0.363484 | -7.499822  |
| C | -3.781829 | -1.763723 | -7.499822  |
| C | -1.763723 | -3.781829 | -7.499822  |
| C | -0.363484 | -4.157000 | -7.499822  |
| C | 3.779894  | -1.761000 | -8.747614  |
| C | 4.153964  | -0.364873 | -8.747614  |
| C | 3.415038  | 2.393009  | -8.747614  |
| C | 2.393009  | 3.415038  | -8.747614  |
| C | -0.364873 | 4.153964  | -8.747614  |
| C | -1.761000 | 3.779894  | -8.747614  |
| C | -3.779894 | 1.761000  | -8.747614  |
| C | -4.153963 | 0.364873  | -8.747614  |
| C | -3.415038 | -2.393009 | -8.747614  |
| C | -2.393009 | -3.415038 | -8.747614  |
| C | 0.364873  | -4.153963 | -8.747614  |
| C | 1.761000  | -3.779894 | -8.747614  |
| C | 4.152782  | 0.365439  | -10.000454 |
| C | 3.779154  | 1.759919  | -10.000454 |
| C | 1.759919  | 3.779154  | -10.000454 |
| C | 0.365439  | 4.152782  | -10.000454 |
| C | -2.392908 | 3.413730  | -10.000453 |
| C | -3.413730 | 2.392908  | -10.000453 |
| C | -4.152782 | -0.365439 | -10.000454 |
| C | -3.779154 | -1.759919 | -10.000454 |
| C | -1.759919 | -3.779154 | -10.000454 |
| C | -0.365439 | -4.152782 | -10.000454 |
| C | 2.392908  | -3.413730 | -10.000453 |
| C | 3.413730  | -2.392908 | -10.000453 |
| C | 3.418329  | 2.393322  | -11.249767 |
| C | 2.393322  | 3.418329  | -11.249767 |
| C | -0.363499 | 4.156968  | -11.249767 |

|   |           |           |            |
|---|-----------|-----------|------------|
| C | -1.763694 | 3.781809  | -11.249767 |
| C | -3.781809 | 1.763694  | -11.249767 |
| C | -4.156968 | 0.363499  | -11.249767 |
| C | -3.418329 | -2.393322 | -11.249767 |
| C | -2.393322 | -3.418329 | -11.249767 |
| C | 0.363499  | -4.156968 | -11.249767 |
| C | 1.763694  | -3.781809 | -11.249767 |
| C | 3.781809  | -1.763694 | -11.249767 |
| C | 4.156968  | -0.363499 | -11.249767 |
| C | 1.761237  | 3.780051  | -12.497277 |
| C | 0.364746  | 4.154217  | -12.497277 |
| C | -2.393026 | 3.415321  | -12.497277 |
| C | -3.415321 | 2.393026  | -12.497277 |
| C | -4.154217 | -0.364746 | -12.497277 |
| C | -3.780051 | -1.761237 | -12.497277 |
| C | -1.761237 | -3.780051 | -12.497277 |
| C | -0.364746 | -4.154217 | -12.497277 |
| C | 2.393026  | -3.415321 | -12.497277 |
| C | 3.415321  | -2.393026 | -12.497277 |
| C | 4.154217  | 0.364746  | -12.497277 |
| C | 3.780051  | 1.761237  | -12.497277 |
| C | -0.365548 | 4.152538  | -13.750076 |
| C | -1.759703 | 3.778998  | -13.750076 |
| C | -3.778998 | 1.759703  | -13.750076 |
| C | -4.152538 | 0.365548  | -13.750076 |
| C | -3.413465 | -2.392880 | -13.750076 |
| C | -2.392880 | -3.413465 | -13.750076 |
| C | 0.365548  | -4.152538 | -13.750076 |
| C | 1.759703  | -3.778998 | -13.750076 |
| C | 3.778998  | -1.759703 | -13.750076 |
| C | 4.152538  | -0.365548 | -13.750076 |
| C | 3.413465  | 2.392881  | -13.750076 |
| C | 2.392880  | 3.413465  | -13.750076 |
| C | -2.393310 | 3.418273  | -14.999739 |
| C | -3.418273 | 2.393310  | -14.999739 |
| C | -4.156913 | -0.363517 | -14.999740 |
| C | -3.781770 | -1.763651 | -14.999740 |
| C | -1.763651 | -3.781770 | -14.999740 |
| C | -0.363517 | -4.156913 | -14.999740 |
| C | 2.393310  | -3.418273 | -14.999739 |
| C | 3.418273  | -2.393310 | -14.999739 |
| C | 4.156913  | 0.363517  | -14.999740 |
| C | 3.781770  | 1.763651  | -14.999740 |
| C | 1.763651  | 3.781770  | -14.999740 |
| C | 0.363517  | 4.156913  | -14.999740 |
| C | -3.780206 | 1.761484  | -16.246960 |
| C | -4.154475 | 0.364611  | -16.246960 |
| C | -3.415612 | -2.393037 | -16.246961 |
| C | -2.393037 | -3.415612 | -16.246961 |
| C | 0.364611  | -4.154475 | -16.246961 |
| C | 1.761484  | -3.780206 | -16.246960 |
| C | 3.780206  | -1.761484 | -16.246960 |
| C | 4.154475  | -0.364611 | -16.246961 |
| C | 3.415612  | 2.393037  | -16.246961 |
| C | 2.393037  | 3.415612  | -16.246961 |
| C | -0.364611 | 4.154475  | -16.246961 |
| C | -1.761484 | 3.780206  | -16.246960 |
| C | -4.152279 | -0.365660 | -17.499705 |
| C | -3.778829 | -1.759475 | -17.499705 |
| C | -1.759475 | -3.778829 | -17.499705 |
| C | -0.365660 | -4.152279 | -17.499705 |
| C | 2.392849  | -3.413184 | -17.499705 |
| C | 3.413184  | -2.392849 | -17.499705 |
| C | 4.152279  | 0.365660  | -17.499705 |
| C | 3.778829  | 1.759475  | -17.499705 |
| C | 1.759475  | 3.778829  | -17.499705 |
| C | 0.365660  | 4.152279  | -17.499705 |
| C | -2.392849 | 3.413184  | -17.499705 |
| C | -3.413184 | 2.392849  | -17.499705 |
| C | -3.418202 | -2.393296 | -18.749742 |

|   |           |           |            |
|---|-----------|-----------|------------|
| C | -2.393296 | -3.418202 | -18.749742 |
| C | 0.363541  | -4.156845 | -18.749742 |
| C | 1.763598  | -3.781724 | -18.749742 |
| C | 3.781724  | -1.763598 | -18.749742 |
| C | 4.156845  | -0.363541 | -18.749742 |
| C | 3.418202  | 2.393296  | -18.749742 |
| C | 2.393296  | 3.418202  | -18.749742 |
| C | -0.363541 | 4.156845  | -18.749742 |
| C | -1.763598 | 3.781724  | -18.749742 |
| C | -3.781724 | 1.763598  | -18.749742 |
| C | -4.156845 | 0.363541  | -18.749742 |
| C | -1.761752 | -3.780374 | -19.996659 |
| C | -0.364462 | -4.154755 | -19.996659 |
| C | 2.393050  | -3.415930 | -19.996660 |
| C | 3.415930  | -2.393050 | -19.996660 |
| C | 4.154755  | 0.364462  | -19.996659 |
| C | 3.780374  | 1.761752  | -19.996659 |
| C | 1.761752  | 3.780374  | -19.996659 |
| C | 0.364462  | 4.154755  | -19.996659 |
| C | -2.393050 | 3.415930  | -19.996660 |
| C | -3.415930 | 2.393050  | -19.996660 |
| C | -4.154755 | -0.364462 | -19.996659 |
| C | -3.780374 | -1.761751 | -19.996659 |
| C | 0.365781  | -4.152005 | -21.249332 |
| C | 1.759236  | -3.778653 | -21.249332 |
| C | 3.778653  | -1.759236 | -21.249332 |
| C | 4.152005  | -0.365781 | -21.249332 |
| C | 3.412886  | 2.392813  | -21.249332 |
| C | 2.392813  | 3.412886  | -21.249332 |
| C | -0.365781 | 4.152005  | -21.249332 |
| C | -1.759236 | 3.778653  | -21.249332 |
| C | -3.778653 | 1.759236  | -21.249332 |
| C | -4.152005 | 0.365781  | -21.249332 |
| C | -3.412885 | -2.392813 | -21.249332 |
| C | -2.392813 | -3.412885 | -21.249332 |
| C | 2.393285  | -3.418134 | -22.499783 |
| C | 3.418134  | -2.393285 | -22.499783 |
| C | 4.156779  | 0.363563  | -22.499783 |
| C | 3.781677  | 1.763542  | -22.499783 |
| C | 1.763542  | 3.781677  | -22.499783 |
| C | 0.363563  | 4.156779  | -22.499783 |
| C | -2.393285 | 3.418134  | -22.499783 |
| C | -3.418134 | 2.393285  | -22.499783 |
| C | -4.156779 | -0.363563 | -22.499783 |
| C | -3.781677 | -1.763542 | -22.499783 |
| C | -1.763542 | -3.781677 | -22.499783 |
| C | -0.363563 | -4.156779 | -22.499783 |
| C | 3.780576  | -1.762066 | -23.746363 |
| C | 4.155084  | -0.364294 | -23.746364 |
| C | 3.416298  | 2.393065  | -23.746364 |
| C | 2.393065  | 3.416298  | -23.746364 |
| C | -0.364294 | 4.155084  | -23.746363 |
| C | -1.762066 | 3.780576  | -23.746363 |
| C | -3.780576 | 1.762066  | -23.746363 |
| C | -4.155084 | 0.364294  | -23.746363 |
| C | -3.416298 | -2.393065 | -23.746364 |
| C | -2.393065 | -3.416298 | -23.746364 |
| C | 0.364294  | -4.155084 | -23.746363 |
| C | 1.762066  | -3.780576 | -23.746363 |
| C | 4.151698  | 0.365918  | -24.998951 |
| C | 3.778455  | 1.758959  | -24.998951 |
| C | 1.758959  | 3.778455  | -24.998951 |
| C | 0.365918  | 4.151698  | -24.998951 |
| C | -2.392785 | 3.412554  | -24.998951 |
| C | -3.412554 | 2.392785  | -24.998951 |
| C | -4.151698 | -0.365918 | -24.998951 |
| C | -3.778455 | -1.758959 | -24.998951 |
| C | -1.758959 | -3.778455 | -24.998951 |
| C | -0.365918 | -4.151698 | -24.998951 |
| C | 2.392785  | -3.412554 | -24.998951 |

|   |           |           |            |
|---|-----------|-----------|------------|
| C | 3.412554  | -2.392785 | -24.998951 |
| C | 3.418061  | 2.393286  | -26.249893 |
| C | 2.393286  | 3.418061  | -26.249893 |
| C | -0.363605 | 4.156722  | -26.249893 |
| C | -1.763484 | 3.781650  | -26.249892 |
| C | -3.781650 | 1.763484  | -26.249892 |
| C | -4.156722 | 0.363605  | -26.249893 |
| C | -3.418061 | -2.393286 | -26.249893 |
| C | -2.393286 | -3.418061 | -26.249893 |
| C | 0.363605  | -4.156722 | -26.249893 |
| C | 1.763484  | -3.781650 | -26.249892 |
| C | 3.781650  | -1.763484 | -26.249892 |
| C | 4.156722  | -0.363605 | -26.249893 |
| C | 1.762422  | 3.780826  | -27.496065 |
| C | 0.364104  | 4.155484  | -27.496065 |
| C | -2.393110 | 3.416743  | -27.496065 |
| C | -3.416742 | 2.393110  | -27.496065 |
| C | -4.155484 | -0.364105 | -27.496065 |
| C | -3.780826 | -1.762422 | -27.496065 |
| C | -1.762422 | -3.780826 | -27.496065 |
| C | -0.364105 | -4.155484 | -27.496065 |
| C | 2.393110  | -3.416743 | -27.496065 |
| C | 3.416743  | -2.393110 | -27.496065 |
| C | 4.155484  | 0.364104  | -27.496065 |
| C | 3.780826  | 1.762422  | -27.496065 |
| C | -0.366102 | 4.151305  | -28.748560 |
| C | -1.758611 | 3.778208  | -28.748560 |
| C | -3.778208 | 1.758611  | -28.748560 |
| C | -4.151305 | 0.366102  | -28.748560 |
| C | -3.412115 | -2.392736 | -28.748561 |
| C | -2.392736 | -3.412115 | -28.748561 |
| C | 0.366102  | -4.151305 | -28.748560 |
| C | 1.758611  | -3.778208 | -28.748560 |
| C | 3.778208  | -1.758611 | -28.748560 |
| C | 4.151305  | -0.366102 | -28.748560 |
| C | 3.412115  | 2.392736  | -28.748561 |
| C | 2.392736  | 3.412115  | -28.748561 |
| C | -2.393262 | 3.417984  | -30.000116 |
| C | -3.417984 | 2.393262  | -30.000116 |
| C | -4.156633 | -0.363615 | -30.000116 |
| C | -3.781576 | -1.763419 | -30.000116 |
| C | -1.763419 | -3.781576 | -30.000116 |
| C | -0.363615 | -4.156633 | -30.000116 |
| C | 2.393262  | -3.417984 | -30.000116 |
| C | 3.417984  | -2.393262 | -30.000116 |
| C | 4.156632  | 0.363615  | -30.000116 |
| C | 3.781575  | 1.763419  | -30.000116 |
| C | 1.763419  | 3.781575  | -30.000116 |
| C | 0.363615  | 4.156632  | -30.000117 |
| C | -3.781112 | 1.762904  | -31.245767 |
| C | -4.155965 | 0.363840  | -31.245767 |
| C | -3.417286 | -2.393107 | -31.245767 |
| C | -2.393107 | -3.417286 | -31.245767 |
| C | 0.363840  | -4.155965 | -31.245767 |
| C | 1.762904  | -3.781112 | -31.245767 |
| C | 3.781112  | -1.762904 | -31.245767 |
| C | 4.155965  | -0.363840 | -31.245767 |
| C | 3.417286  | 2.393107  | -31.245767 |
| C | 2.393107  | 3.417286  | -31.245767 |
| C | -0.363840 | 4.155965  | -31.245767 |
| C | -1.762904 | 3.781112  | -31.245767 |
| C | -4.150796 | -0.366372 | -32.498146 |
| C | -3.777899 | -1.758109 | -32.498145 |
| C | -1.758109 | -3.777899 | -32.498145 |
| C | -0.366372 | -4.150796 | -32.498146 |
| C | 2.392732  | -3.411547 | -32.498147 |
| C | 3.411547  | -2.392732 | -32.498147 |
| C | 4.150796  | 0.366372  | -32.498146 |
| C | 3.777899  | 1.758109  | -32.498145 |
| C | 1.758109  | 3.777899  | -32.498145 |

|   |           |           |            |
|---|-----------|-----------|------------|
| C | 0.366372  | 4.150796  | -32.498146 |
| C | -2.392732 | 3.411547  | -32.498147 |
| C | -3.411547 | 2.392732  | -32.498147 |
| C | -3.418149 | -2.393403 | -33.750583 |
| C | -2.393403 | -3.418149 | -33.750583 |
| C | 0.363666  | -4.156862 | -33.750586 |
| C | 1.763506  | -3.781802 | -33.750587 |
| C | 3.781802  | -1.763506 | -33.750587 |
| C | 4.156862  | -0.363666 | -33.750586 |
| C | 3.418149  | 2.393403  | -33.750584 |
| C | 2.393403  | 3.418149  | -33.750584 |
| C | -0.363666 | 4.156862  | -33.750586 |
| C | -1.763506 | 3.781802  | -33.750587 |
| C | -3.781803 | 1.763506  | -33.750587 |
| C | -4.156862 | 0.363666  | -33.750586 |
| C | -1.763890 | -3.782163 | -34.995395 |
| C | -0.363500 | -4.157377 | -34.995397 |
| C | 2.393537  | -3.418688 | -34.995400 |
| C | 3.418688  | -2.393537 | -34.995400 |
| C | 4.157377  | 0.363500  | -34.995397 |
| C | 3.782163  | 1.763890  | -34.995395 |
| C | 1.763890  | 3.782163  | -34.995395 |
| C | 0.363500  | 4.157377  | -34.995397 |
| C | -2.393537 | 3.418688  | -34.995400 |
| C | -3.418688 | 2.393537  | -34.995400 |
| C | -4.157377 | -0.363500 | -34.995397 |
| C | -3.782163 | -1.763890 | -34.995395 |
| C | 0.367033  | -4.150374 | -36.247452 |
| C | 1.757341  | -3.777867 | -36.247455 |
| C | 3.777867  | -1.757341 | -36.247455 |
| C | 4.150374  | -0.367033 | -36.247452 |
| C | 3.410843  | 2.393075  | -36.247449 |
| C | 2.393075  | 3.410843  | -36.247449 |
| C | -0.367033 | 4.150374  | -36.247452 |
| C | -1.757341 | 3.777867  | -36.247455 |
| C | -3.777868 | 1.757341  | -36.247455 |
| C | -4.150374 | 0.367033  | -36.247452 |
| C | -3.410843 | -2.393075 | -36.247448 |
| C | -2.393075 | -3.410843 | -36.247449 |
| C | 2.392753  | -3.417240 | -37.501612 |
| C | 3.417240  | -2.392753 | -37.501612 |
| C | 4.155739  | 0.363547  | -37.501607 |
| C | 3.780767  | 1.763031  | -37.501604 |
| C | 1.763031  | 3.780767  | -37.501604 |
| C | 0.363547  | 4.155739  | -37.501607 |
| C | -2.392753 | 3.417240  | -37.501612 |
| C | -3.417240 | 2.392753  | -37.501612 |
| C | -4.155739 | -0.363547 | -37.501607 |
| C | -3.780767 | -1.763031 | -37.501604 |
| C | -1.763031 | -3.780767 | -37.501604 |
| C | -0.363547 | -4.155739 | -37.501607 |
| C | 3.777722  | -1.763163 | -38.744728 |
| C | 4.153169  | -0.361917 | -38.744725 |
| C | 3.415823  | 2.390045  | -38.744717 |
| C | 2.390045  | 3.415823  | -38.744717 |
| C | -0.361917 | 4.153169  | -38.744725 |
| C | -1.763163 | 3.777722  | -38.744728 |
| C | -3.777723 | 1.763163  | -38.744728 |
| C | -4.153169 | 0.361917  | -38.744724 |
| C | -3.415823 | -2.390045 | -38.744717 |
| C | -2.390045 | -3.415823 | -38.744717 |
| C | 0.361917  | -4.153169 | -38.744724 |
| C | 1.763163  | -3.777723 | -38.744728 |
| C | 4.134200  | 0.366655  | -39.996324 |
| C | 3.763659  | 1.749566  | -39.996314 |
| C | 1.749566  | 3.763659  | -39.996314 |
| C | 0.366655  | 4.134200  | -39.996324 |
| C | -2.384650 | 3.397006  | -39.996330 |
| C | -3.397007 | 2.384650  | -39.996330 |
| C | -4.134200 | -0.366655 | -39.996324 |

|   |           |           |            |
|---|-----------|-----------|------------|
| C | -3.763659 | -1.749566 | -39.996314 |
| C | -1.749566 | -3.763659 | -39.996314 |
| C | -0.366655 | -4.134200 | -39.996324 |
| C | 2.384650  | -3.397007 | -39.996330 |
| C | 3.397006  | -2.384651 | -39.996331 |
| C | 3.410603  | 2.384489  | -41.258668 |
| C | 2.384489  | 3.410603  | -41.258668 |
| C | -0.359701 | 4.145866  | -41.258693 |
| C | -1.761406 | 3.770284  | -41.258691 |
| C | -3.770285 | 1.761406  | -41.258691 |
| C | -4.145867 | 0.359701  | -41.258693 |
| C | -3.410603 | -2.384490 | -41.258667 |
| C | -2.384490 | -3.410603 | -41.258667 |
| C | 0.359701  | -4.145867 | -41.258693 |
| C | 1.761406  | -3.770285 | -41.258691 |
| C | 3.770284  | -1.761406 | -41.258691 |
| C | 4.145866  | -0.359701 | -41.258693 |
| C | 1.785216  | 3.817680  | -42.498752 |
| C | 0.362830  | 4.198751  | -42.498776 |
| C | -2.413605 | 3.454851  | -42.498778 |
| C | -3.454852 | 2.413605  | -42.498778 |
| C | -4.198751 | -0.362830 | -42.498776 |
| C | -3.817681 | -1.785216 | -42.498752 |
| C | -1.785216 | -3.817681 | -42.498752 |
| C | -0.362830 | -4.198751 | -42.498776 |
| C | 2.413605  | -3.454852 | -42.498777 |
| C | 3.454851  | -2.413605 | -42.498777 |
| C | 4.198751  | 0.362830  | -42.498776 |
| C | 3.817681  | 1.785216  | -42.498752 |
| C | -0.421252 | 4.249134  | -43.712494 |
| C | -1.759735 | 3.890525  | -43.712492 |
| C | -3.890526 | 1.759734  | -43.712492 |
| C | -4.249135 | 0.421252  | -43.712493 |
| C | -3.469368 | -2.489539 | -43.712455 |
| C | -2.489539 | -3.469368 | -43.712455 |
| C | 0.421252  | -4.249134 | -43.712493 |
| C | 1.759734  | -3.890526 | -43.712492 |
| C | 3.890526  | -1.759735 | -43.712492 |
| C | 4.249134  | -0.421252 | -43.712494 |
| C | 3.469368  | 2.489539  | -43.712456 |
| C | 2.489539  | 3.469368  | -43.712456 |
| H | -3.810152 | 2.290760  | 44.669725  |
| H | -4.445032 | -0.078817 | 44.669726  |
| H | -3.889122 | -2.154457 | 44.669675  |
| H | -2.154457 | -3.889122 | 44.669675  |
| H | -0.078817 | -4.445032 | 44.669726  |
| H | 2.290760  | -3.810152 | 44.669725  |
| H | 3.810152  | -2.290760 | 44.669725  |
| H | 4.445032  | 0.078817  | 44.669726  |
| H | 3.889121  | 2.154456  | 44.669675  |
| H | 2.154456  | 3.889121  | 44.669675  |
| H | 0.078817  | 4.445032  | 44.669726  |
| H | -2.290760 | 3.810152  | 44.669725  |
| H | 0.078817  | 4.445032  | -44.669726 |
| H | -2.290760 | 3.810152  | -44.669725 |
| H | -3.810153 | 2.290760  | -44.669725 |
| H | -4.445032 | -0.078817 | -44.669726 |
| H | -3.889122 | -2.154457 | -44.669675 |
| H | -2.154457 | -3.889122 | -44.669675 |
| H | -0.078817 | -4.445032 | -44.669726 |
| H | 2.290760  | -3.810153 | -44.669725 |
| H | 3.810152  | -2.290760 | -44.669724 |
| H | 4.445032  | 0.078817  | -44.669726 |
| H | 3.889122  | 2.154457  | -44.669675 |
| H | 2.154457  | 3.889122  | -44.669675 |

Nanotube (6,6) u36v0s  
B3LYP/STO-3G Energy: -32541.850349

|   |           |           |            |
|---|-----------|-----------|------------|
| C | -4.248313 | 0.421521  | -44.346477 |
| C | -3.889948 | 1.759086  | -44.346476 |
| C | -1.759085 | 3.889949  | -44.346476 |
| C | -0.421521 | 4.248313  | -44.346477 |
| C | 2.489364  | 3.468520  | -44.346439 |
| C | 3.468520  | 2.489364  | -44.346439 |
| C | 4.248313  | -0.421521 | -44.346477 |
| C | 3.889949  | -1.759085 | -44.346476 |
| C | 1.759086  | -3.889948 | -44.346476 |
| C | 0.421521  | -4.248313 | -44.346477 |
| C | -2.489363 | -3.468520 | -44.346439 |
| C | -3.468520 | -2.489363 | -44.346439 |
| C | -3.453483 | 2.413309  | -43.131836 |
| C | -2.413308 | 3.453483  | -43.131836 |
| C | 0.363260  | 4.197422  | -43.131834 |
| C | 1.784181  | 3.816745  | -43.131810 |
| C | 3.816745  | 1.784181  | -43.131810 |
| C | 4.197422  | 0.363260  | -43.131834 |
| C | 3.453483  | -2.413308 | -43.131836 |
| C | 2.413309  | -3.453483 | -43.131836 |
| C | -0.363260 | -4.197422 | -43.131834 |
| C | -1.784181 | -3.816744 | -43.131810 |
| C | -3.816744 | -1.784180 | -43.131810 |
| C | -4.197422 | -0.363260 | -43.131834 |
| C | -1.761697 | 3.770406  | -41.891733 |
| C | -0.359507 | 4.146119  | -41.891735 |
| C | 2.384452  | 3.410921  | -41.891709 |
| C | 3.410921  | 2.384452  | -41.891709 |
| C | 4.146119  | -0.359507 | -41.891735 |
| C | 3.770406  | -1.761696 | -41.891733 |
| C | 1.761697  | -3.770405 | -41.891733 |
| C | 0.359508  | -4.146118 | -41.891735 |
| C | -2.384452 | -3.410920 | -41.891709 |
| C | -3.410920 | -2.384452 | -41.891709 |
| C | -4.146118 | 0.359508  | -41.891735 |
| C | -3.770405 | 1.761697  | -41.891733 |
| C | 0.366851  | 4.133571  | -40.629952 |
| C | 1.749085  | 3.763213  | -40.629942 |
| C | 3.763213  | 1.749085  | -40.629942 |
| C | 4.133571  | 0.366851  | -40.629952 |
| C | 3.396363  | -2.384502 | -40.629959 |
| C | 2.384503  | -3.396363 | -40.629960 |
| C | -0.366850 | -4.133571 | -40.629952 |
| C | -1.749084 | -3.763212 | -40.629942 |
| C | -3.763212 | -1.749084 | -40.629942 |
| C | -4.133571 | -0.366850 | -40.629952 |
| C | -3.396363 | 2.384503  | -40.629959 |
| C | -2.384502 | 3.396363  | -40.629959 |
| C | 2.389817  | 3.414506  | -39.377194 |
| C | 3.414506  | 2.389817  | -39.377194 |
| C | 4.151913  | -0.362376 | -39.377202 |
| C | 3.776864  | -1.762135 | -39.377206 |
| C | 1.762135  | -3.776864 | -39.377206 |
| C | 0.362377  | -4.151913 | -39.377202 |
| C | -2.389817 | -3.414506 | -39.377194 |
| C | -3.414506 | -2.389817 | -39.377194 |
| C | -4.151913 | 0.362377  | -39.377202 |
| C | -3.776864 | 1.762135  | -39.377206 |
| C | -1.762135 | 3.776864  | -39.377206 |
| C | -0.362376 | 4.151913  | -39.377202 |
| C | 3.780851  | 1.763342  | -38.133951 |
| C | 4.155966  | 0.363321  | -38.133955 |
| C | 3.417551  | -2.392669 | -38.133961 |
| C | 2.392670  | -3.417550 | -38.133961 |
| C | -0.363320 | -4.155965 | -38.133955 |
| C | -1.763342 | -3.780850 | -38.133951 |
| C | -3.780850 | -1.763342 | -38.133951 |
| C | -4.155965 | -0.363320 | -38.133955 |
| C | -3.417550 | 2.392670  | -38.133961 |

|   |           |           |            |
|---|-----------|-----------|------------|
| C | -2.392669 | 3.417551  | -38.133961 |
| C | 0.363321  | 4.155966  | -38.133955 |
| C | 1.763342  | 3.780851  | -38.133951 |
| C | 4.149782  | -0.367193 | -36.880553 |
| C | 3.777435  | -1.756906 | -36.880556 |
| C | 1.756906  | -3.777435 | -36.880556 |
| C | 0.367193  | -4.149782 | -36.880553 |
| C | -2.392919 | -3.410251 | -36.880549 |
| C | -3.410251 | -2.392919 | -36.880549 |
| C | -4.149782 | 0.367193  | -36.880553 |
| C | -3.777435 | 1.756906  | -36.880556 |
| C | -1.756906 | 3.777435  | -36.880556 |
| C | -0.367193 | 4.149782  | -36.880553 |
| C | 2.392920  | 3.410251  | -36.880549 |
| C | 3.410251  | 2.392920  | -36.880549 |
| C | 3.417146  | -2.393264 | -35.627337 |
| C | 2.393264  | -3.417146 | -35.627337 |
| C | -0.364034 | -4.155905 | -35.627334 |
| C | -1.762691 | -3.781156 | -35.627331 |
| C | -3.781156 | -1.762691 | -35.627331 |
| C | -4.155905 | -0.364034 | -35.627334 |
| C | -3.417146 | 2.393264  | -35.627337 |
| C | -2.393264 | 3.417146  | -35.627337 |
| C | 0.364034  | 4.155905  | -35.627333 |
| C | 1.762691  | 3.781156  | -35.627331 |
| C | 3.781156  | 1.762692  | -35.627331 |
| C | 4.155905  | 0.364034  | -35.627333 |
| C | 1.763832  | -3.781853 | -34.382166 |
| C | 0.363409  | -4.157069 | -34.382164 |
| C | -2.393285 | -3.418458 | -34.382162 |
| C | -3.418458 | -2.393285 | -34.382162 |
| C | -4.157069 | 0.363409  | -34.382164 |
| C | -3.781853 | 1.763832  | -34.382166 |
| C | -1.763832 | 3.781854  | -34.382166 |
| C | -0.363409 | 4.157069  | -34.382164 |
| C | 2.393285  | 3.418459  | -34.382162 |
| C | 3.418459  | 2.393285  | -34.382162 |
| C | 4.157069  | -0.363409 | -34.382164 |
| C | 3.781854  | -1.763832 | -34.382166 |
| C | -0.366426 | -4.150327 | -33.130674 |
| C | -1.757827 | -3.777521 | -33.130673 |
| C | -3.777521 | -1.757827 | -33.130673 |
| C | -4.150327 | -0.366426 | -33.130674 |
| C | -3.411114 | 2.392546  | -33.130674 |
| C | -2.392545 | 3.411115  | -33.130674 |
| C | 0.366426  | 4.150327  | -33.130673 |
| C | 1.757827  | 3.777521  | -33.130673 |
| C | 3.777521  | 1.757827  | -33.130673 |
| C | 4.150327  | 0.366426  | -33.130673 |
| C | 3.411115  | -2.392545 | -33.130674 |
| C | 2.392546  | -3.411114 | -33.130674 |
| C | -2.392815 | -3.415519 | -31.877091 |
| C | -3.415519 | -2.392815 | -31.877091 |
| C | -4.154290 | 0.364470  | -31.877091 |
| C | -3.779978 | 1.761521  | -31.877091 |
| C | -1.761521 | 3.779978  | -31.877091 |
| C | -0.364470 | 4.154290  | -31.877091 |
| C | 2.392815  | 3.415520  | -31.877091 |
| C | 3.415520  | 2.392815  | -31.877091 |
| C | 4.154290  | -0.364470 | -31.877091 |
| C | 3.779978  | -1.761521 | -31.877091 |
| C | 1.761521  | -3.779978 | -31.877091 |
| C | 0.364470  | -4.154290 | -31.877091 |
| C | -3.781657 | -1.763750 | -30.630826 |
| C | -4.156869 | -0.363369 | -30.630826 |
| C | -3.418313 | 2.393169  | -30.630826 |
| C | -2.393169 | 3.418313  | -30.630826 |
| C | 0.363369  | 4.156869  | -30.630826 |
| C | 1.763750  | 3.781657  | -30.630826 |
| C | 3.781657  | 1.763750  | -30.630826 |



|   |           |           |            |
|---|-----------|-----------|------------|
| C | 4.156869  | 0.363369  | -30.630826 |
| C | 3.418313  | -2.393169 | -30.630826 |
| C | 2.393169  | -3.418313 | -30.630826 |
| C | -0.363369 | -4.156869 | -30.630826 |
| C | -1.763750 | -3.781657 | -30.630826 |
| C | -4.151098 | 0.366070  | -29.380459 |
| C | -3.778013 | 1.758536  | -29.380460 |
| C | -1.758536 | 3.778013  | -29.380459 |
| C | -0.366070 | 4.151098  | -29.380459 |
| C | 2.392605  | 3.411953  | -29.380459 |
| C | 3.411953  | 2.392605  | -29.380459 |
| C | 4.151098  | -0.366070 | -29.380459 |
| C | 3.778013  | -1.758536 | -29.380459 |
| C | 1.758536  | -3.778013 | -29.380460 |
| C | 0.366070  | -4.151098 | -29.380459 |
| C | -2.392605 | -3.411953 | -29.380459 |
| C | -3.411953 | -2.392605 | -29.380459 |
| C | -3.414794 | 2.392801  | -28.126797 |
| C | -2.392801 | 3.414794  | -28.126797 |
| C | 0.364811  | 4.153642  | -28.126797 |
| C | 1.760888  | 3.779584  | -28.126797 |
| C | 3.779584  | 1.760888  | -28.126797 |
| C | 4.153642  | 0.364811  | -28.126797 |
| C | 3.414794  | -2.392801 | -28.126797 |
| C | 2.392801  | -3.414794 | -28.126797 |
| C | -0.364811 | -4.153642 | -28.126797 |
| C | -1.760888 | -3.779584 | -28.126797 |
| C | -3.779584 | -1.760888 | -28.126797 |
| C | -4.153642 | -0.364811 | -28.126797 |
| C | -1.763762 | 3.781683  | -26.879723 |
| C | -0.363381 | 4.156889  | -26.879723 |
| C | 2.393176  | 3.418319  | -26.879723 |
| C | 3.418319  | 2.393176  | -26.879723 |
| C | 4.156889  | -0.363381 | -26.879723 |
| C | 3.781683  | -1.763762 | -26.879723 |
| C | 1.763762  | -3.781683 | -26.879723 |
| C | 0.363381  | -4.156889 | -26.879723 |
| C | -2.393176 | -3.418319 | -26.879723 |
| C | -3.418319 | -2.393176 | -26.879723 |
| C | -4.156889 | 0.363381  | -26.879723 |
| C | -3.781683 | 1.763762  | -26.879723 |
| C | 0.365772  | 4.151729  | -25.630157 |
| C | 1.759100  | 3.778409  | -25.630158 |
| C | 3.778409  | 1.759100  | -25.630158 |
| C | 4.151729  | 0.365772  | -25.630157 |
| C | 3.412654  | -2.392675 | -25.630157 |
| C | 2.392675  | -3.412654 | -25.630157 |
| C | -0.365772 | -4.151729 | -25.630158 |
| C | -1.759100 | -3.778409 | -25.630158 |
| C | -3.778409 | -1.759100 | -25.630158 |
| C | -4.151729 | -0.365772 | -25.630158 |
| C | -3.412654 | 2.392675  | -25.630157 |
| C | -2.392675 | 3.412654  | -25.630157 |
| C | 2.392753  | 3.414183  | -24.376509 |
| C | 3.414183  | 2.392753  | -24.376509 |
| C | 4.153098  | -0.365081 | -24.376508 |
| C | 3.779249  | -1.760390 | -24.376508 |
| C | 1.760390  | -3.779249 | -24.376508 |
| C | 0.365081  | -4.153098 | -24.376508 |
| C | -2.392753 | -3.414183 | -24.376509 |
| C | -3.414183 | -2.392753 | -24.376509 |
| C | -4.153098 | 0.365081  | -24.376508 |
| C | -3.779249 | 1.760390  | -24.376508 |
| C | -1.760390 | 3.779249  | -24.376508 |
| C | -0.365081 | 4.153098  | -24.376508 |
| C | 3.781635  | 1.763704  | -23.128719 |
| C | 4.156823  | 0.363401  | -23.128719 |
| C | 3.418255  | -2.393168 | -23.128718 |
| C | 2.393168  | -3.418255 | -23.128718 |
| C | -0.363401 | -4.156823 | -23.128719 |

|   |           |           |            |
|---|-----------|-----------|------------|
| C | -1.763704 | -3.781635 | -23.128719 |
| C | -3.781635 | -1.763704 | -23.128719 |
| C | -4.156823 | -0.363401 | -23.128719 |
| C | -3.418255 | 2.393168  | -23.128718 |
| C | -2.393168 | 3.418255  | -23.128718 |
| C | 0.363401  | 4.156823  | -23.128719 |
| C | 1.763704  | 3.781635  | -23.128719 |
| C | 4.152292  | -0.365509 | -21.879790 |
| C | 3.778766  | -1.759615 | -21.879790 |
| C | 1.759615  | -3.778766 | -21.879790 |
| C | 0.365509  | -4.152292 | -21.879790 |
| C | -2.392722 | -3.413271 | -21.879790 |
| C | -3.413271 | -2.392722 | -21.879790 |
| C | -4.152292 | 0.365509  | -21.879790 |
| C | -3.778766 | 1.759615  | -21.879790 |
| C | -1.759615 | 3.778766  | -21.879790 |
| C | -0.365509 | 4.152292  | -21.879790 |
| C | 2.392722  | 3.413271  | -21.879790 |
| C | 3.413271  | 2.392722  | -21.879790 |
| C | 3.413683  | -2.392718 | -20.626234 |
| C | 2.392718  | -3.413684 | -20.626234 |
| C | -0.365297 | -4.152644 | -20.626234 |
| C | -1.759972 | -3.778963 | -20.626234 |
| C | -3.778963 | -1.759972 | -20.626234 |
| C | -4.152644 | -0.365297 | -20.626234 |
| C | -3.413684 | 2.392718  | -20.626234 |
| C | -2.392718 | 3.413683  | -20.626234 |
| C | 0.365297  | 4.152643  | -20.626234 |
| C | 1.759971  | 3.778963  | -20.626234 |
| C | 3.778963  | 1.759971  | -20.626234 |
| C | 4.152643  | 0.365297  | -20.626234 |
| C | 1.763602  | -3.781557 | -19.377770 |
| C | 0.363453  | -4.156702 | -19.377770 |
| C | -2.393149 | -3.418122 | -19.377771 |
| C | -3.418122 | -2.393149 | -19.377771 |
| C | -4.156702 | 0.363453  | -19.377770 |
| C | -3.781557 | 1.763602  | -19.377770 |
| C | -1.763602 | 3.781556  | -19.377770 |
| C | -0.363453 | 4.156702  | -19.377770 |
| C | 2.393149  | 3.418122  | -19.377771 |
| C | 3.418122  | 2.393149  | -19.377771 |
| C | 4.156702  | -0.363453 | -19.377770 |
| C | 3.781556  | -1.763602 | -19.377770 |
| C | -0.365254 | -4.152828 | -18.129365 |
| C | -1.760102 | -3.779102 | -18.129365 |
| C | -3.779102 | -1.760102 | -18.129365 |
| C | -4.152828 | -0.365254 | -18.129365 |
| C | -3.413864 | 2.392772  | -18.129365 |
| C | -2.392772 | 3.413864  | -18.129364 |
| C | 0.365254  | 4.152828  | -18.129365 |
| C | 1.760102  | 3.779101  | -18.129365 |
| C | 3.779101  | 1.760102  | -18.129365 |
| C | 4.152828  | 0.365254  | -18.129365 |
| C | 3.413864  | -2.392772 | -18.129365 |
| C | 2.392772  | -3.413864 | -18.129365 |
| C | -2.392684 | -3.413265 | -16.875978 |
| C | -3.413265 | -2.392684 | -16.875978 |
| C | -4.152267 | 0.365478  | -16.875977 |
| C | -3.778728 | 1.759628  | -16.875977 |
| C | -1.759628 | 3.778728  | -16.875977 |
| C | -0.365478 | 4.152266  | -16.875977 |
| C | 2.392684  | 3.413265  | -16.875978 |
| C | 3.413265  | 2.392684  | -16.875978 |
| C | 4.152266  | -0.365478 | -16.875977 |
| C | 3.778728  | -1.759628 | -16.875977 |
| C | 1.759628  | -3.778728 | -16.875977 |
| C | 0.365478  | -4.152267 | -16.875977 |
| C | -3.781438 | -1.763443 | -15.626862 |
| C | -4.156520 | -0.363531 | -15.626862 |
| C | -3.417927 | 2.393127  | -15.626862 |

|   |           |           |            |
|---|-----------|-----------|------------|
| C | -2.393127 | 3.417926  | -15.626862 |
| C | 0.363531  | 4.156520  | -15.626862 |
| C | 1.763442  | 3.781438  | -15.626862 |
| C | 3.781438  | 1.763442  | -15.626862 |
| C | 4.156520  | 0.363531  | -15.626862 |
| C | 3.417926  | -2.393127 | -15.626862 |
| C | 2.393127  | -3.417927 | -15.626862 |
| C | -0.363531 | -4.156520 | -15.626862 |
| C | -1.763443 | -3.781438 | -15.626862 |
| C | -4.153348 | 0.365007  | -14.378882 |
| C | -3.779429 | 1.760576  | -14.378882 |
| C | -1.760576 | 3.779429  | -14.378882 |
| C | -0.365008 | 4.153348  | -14.378882 |
| C | 2.392818  | 3.414438  | -14.378882 |
| C | 3.414438  | 2.392818  | -14.378882 |
| C | 4.153348  | -0.365008 | -14.378882 |
| C | 3.779429  | -1.760576 | -14.378882 |
| C | 1.760576  | -3.779429 | -14.378882 |
| C | 0.365007  | -4.153348 | -14.378882 |
| C | -2.392818 | -3.414438 | -14.378882 |
| C | -3.414438 | -2.392818 | -14.378882 |
| C | -3.412930 | 2.392657  | -13.125738 |
| C | -2.392657 | 3.412929  | -13.125738 |
| C | 0.365622  | 4.151962  | -13.125738 |
| C | 1.759350  | 3.778536  | -13.125738 |
| C | 3.778536  | 1.759350  | -13.125738 |
| C | 4.151962  | 0.365622  | -13.125738 |
| C | 3.412929  | -2.392657 | -13.125738 |
| C | 2.392657  | -3.412930 | -13.125738 |
| C | -0.365622 | -4.151962 | -13.125738 |
| C | -1.759350 | -3.778536 | -13.125738 |
| C | -3.778536 | -1.759350 | -13.125738 |
| C | -4.151962 | -0.365622 | -13.125738 |
| C | -1.763230 | 3.781283  | -11.875989 |
| C | -0.363639 | 4.156279  | -11.875989 |
| C | 2.393099  | 3.417664  | -11.875989 |
| C | 3.417664  | 2.393099  | -11.875989 |
| C | 4.156279  | -0.363639 | -11.875989 |
| C | 3.781283  | -1.763230 | -11.875989 |
| C | 1.763229  | -3.781283 | -11.875989 |
| C | 0.363638  | -4.156280 | -11.875989 |
| C | -2.393099 | -3.417664 | -11.875989 |
| C | -3.417664 | -2.393099 | -11.875989 |
| C | -4.156280 | 0.363638  | -11.875989 |
| C | -3.781283 | 1.763229  | -11.875989 |
| C | 0.364768  | 4.153853  | -10.628341 |
| C | 1.761037  | 3.779747  | -10.628341 |
| C | 3.779747  | 1.761037  | -10.628341 |
| C | 4.153853  | 0.364768  | -10.628341 |
| C | 3.414996  | -2.392864 | -10.628341 |
| C | 2.392863  | -3.414996 | -10.628341 |
| C | -0.364768 | -4.153854 | -10.628341 |
| C | -1.761037 | -3.779747 | -10.628341 |
| C | -3.779747 | -1.761037 | -10.628341 |
| C | -4.153854 | -0.364768 | -10.628341 |
| C | -3.414996 | 2.392863  | -10.628341 |
| C | -2.392864 | 3.414996  | -10.628341 |
| C | 2.392636  | 3.412675  | -9.375514  |
| C | 3.412675  | 2.392636  | -9.375514  |
| C | 4.151731  | -0.365732 | -9.375514  |
| C | 3.778391  | -1.759140 | -9.375514  |
| C | 1.759140  | -3.778391 | -9.375514  |
| C | 0.365731  | -4.151732 | -9.375514  |
| C | -2.392637 | -3.412675 | -9.375514  |
| C | -3.412675 | -2.392637 | -9.375514  |
| C | -4.151732 | 0.365731  | -9.375514  |
| C | -3.778391 | 1.759140  | -9.375514  |
| C | -1.759140 | 3.778391  | -9.375514  |
| C | -0.365732 | 4.151731  | -9.375514  |
| C | 3.781093  | 1.762964  | -8.125153  |

|   |           |           |           |
|---|-----------|-----------|-----------|
| C | 4.155982  | 0.363773  | -8.125153 |
| C | 3.417339  | -2.393067 | -8.125153 |
| C | 2.393067  | -3.417339 | -8.125153 |
| C | -0.363773 | -4.155983 | -8.125153 |
| C | -1.762964 | -3.781094 | -8.125153 |
| C | -3.781094 | -1.762964 | -8.125153 |
| C | -4.155983 | -0.363773 | -8.125153 |
| C | -3.417339 | 2.393067  | -8.125153 |
| C | -2.393067 | 3.417339  | -8.125153 |
| C | 0.363773  | 4.155982  | -8.125153 |
| C | 1.762964  | 3.781093  | -8.125153 |
| C | 4.154341  | -0.364537 | -6.877744 |
| C | 3.780054  | -1.761481 | -6.877744 |
| C | 1.761481  | -3.780055 | -6.877744 |
| C | 0.364537  | -4.154342 | -6.877744 |
| C | -2.392908 | -3.415535 | -6.877744 |
| C | -3.415535 | -2.392908 | -6.877744 |
| C | -4.154342 | 0.364537  | -6.877744 |
| C | -3.780054 | 1.761481  | -6.877744 |
| C | -1.761481 | 3.780054  | -6.877744 |
| C | -0.364537 | 4.154341  | -6.877744 |
| C | 2.392908  | 3.415534  | -6.877744 |
| C | 3.415534  | 2.392908  | -6.877744 |
| C | 3.412503  | -2.392622 | -5.625303 |
| C | 2.392622  | -3.412504 | -5.625303 |
| C | -0.365805 | -4.151576 | -5.625303 |
| C | -1.758999 | -3.778294 | -5.625302 |
| C | -3.778294 | -1.758999 | -5.625302 |
| C | -4.151576 | -0.365805 | -5.625303 |
| C | -3.412504 | 2.392622  | -5.625303 |
| C | -2.392622 | 3.412503  | -5.625303 |
| C | 0.365805  | 4.151576  | -5.625303 |
| C | 1.758999  | 3.778293  | -5.625302 |
| C | 3.778293  | 1.758999  | -5.625302 |
| C | 4.151576  | 0.365805  | -5.625303 |
| C | 1.762650  | -3.780872 | -4.374358 |
| C | 0.363933  | -4.155634 | -4.374358 |
| C | -2.393032 | -3.416957 | -4.374358 |
| C | -3.416957 | -2.393032 | -4.374358 |
| C | -4.155634 | 0.363933  | -4.374358 |
| C | -3.780872 | 1.762650  | -4.374358 |
| C | -1.762651 | 3.780871  | -4.374358 |
| C | -0.363934 | 4.155633  | -4.374358 |
| C | 2.393031  | 3.416956  | -4.374358 |
| C | 3.416956  | 2.393031  | -4.374358 |
| C | 4.155634  | -0.363934 | -4.374358 |
| C | 3.780871  | -1.762651 | -4.374358 |
| C | -0.364319 | -4.154806 | -3.127094 |
| C | -1.761903 | -3.780348 | -3.127094 |
| C | -3.780348 | -1.761903 | -3.127094 |
| C | -4.154806 | -0.364319 | -3.127094 |
| C | -3.416046 | 2.392951  | -3.127093 |
| C | -2.392951 | 3.416046  | -3.127093 |
| C | 0.364319  | 4.154806  | -3.127094 |
| C | 1.761902  | 3.780347  | -3.127094 |
| C | 3.780347  | 1.761902  | -3.127094 |
| C | 4.154806  | 0.364319  | -3.127094 |
| C | 3.416046  | -2.392951 | -3.127093 |
| C | 2.392951  | -3.416046 | -3.127093 |
| C | -2.392615 | -3.412418 | -1.875100 |
| C | -3.412418 | -2.392615 | -1.875100 |
| C | -4.151498 | 0.365841  | -1.875100 |
| C | -3.778244 | 1.758928  | -1.875100 |
| C | -1.758928 | 3.778244  | -1.875100 |
| C | -0.365842 | 4.151498  | -1.875100 |
| C | 2.392615  | 3.412417  | -1.875100 |
| C | 3.412417  | 2.392615  | -1.875100 |
| C | 4.151498  | -0.365842 | -1.875100 |
| C | 3.778244  | -1.758928 | -1.875100 |
| C | 1.758928  | -3.778244 | -1.875100 |

|   |           |           |           |
|---|-----------|-----------|-----------|
| C | 0.365841  | -4.151498 | -1.875100 |
| C | -3.780621 | -1.762295 | -0.623608 |
| C | -4.155239 | -0.364117 | -0.623608 |
| C | -3.416523 | 2.392992  | -0.623608 |
| C | -2.392993 | 3.416523  | -0.623608 |
| C | 0.364116  | 4.155239  | -0.623608 |
| C | 1.762294  | 3.780621  | -0.623608 |
| C | 3.780621  | 1.762294  | -0.623608 |
| C | 4.155239  | 0.364116  | -0.623608 |
| C | 3.416523  | -2.392993 | -0.623608 |
| C | 2.392992  | -3.416523 | -0.623608 |
| C | -0.364117 | -4.155239 | -0.623608 |
| C | -1.762295 | -3.780621 | -0.623608 |
| C | -4.155239 | 0.364116  | 0.623608  |
| C | -3.780621 | 1.762294  | 0.623608  |
| C | -1.762295 | 3.780621  | 0.623608  |
| C | -0.364117 | 4.155239  | 0.623608  |
| C | 2.392992  | 3.416523  | 0.623608  |
| C | 3.416523  | 2.392992  | 0.623608  |
| C | 4.155239  | -0.364117 | 0.623608  |
| C | 3.780621  | -1.762295 | 0.623608  |
| C | 1.762294  | -3.780621 | 0.623608  |
| C | 0.364116  | -4.155239 | 0.623608  |
| C | -2.392993 | -3.416523 | 0.623608  |
| C | -3.416523 | -2.392993 | 0.623608  |
| C | -3.412418 | 2.392615  | 1.875100  |
| C | -2.392615 | 3.412417  | 1.875100  |
| C | 0.365842  | 4.151498  | 1.875100  |
| C | 1.758928  | 3.778244  | 1.875100  |
| C | 3.778244  | 1.758928  | 1.875100  |
| C | 4.151498  | 0.365841  | 1.875100  |
| C | 3.412417  | -2.392615 | 1.875100  |
| C | 2.392615  | -3.412418 | 1.875100  |
| C | -0.365842 | -4.151498 | 1.875100  |
| C | -1.758928 | -3.778244 | 1.875100  |
| C | -3.778244 | -1.758928 | 1.875100  |
| C | -4.151498 | -0.365842 | 1.875100  |
| C | -1.761903 | 3.780347  | 3.127094  |
| C | -0.364319 | 4.154806  | 3.127094  |
| C | 2.392951  | 3.416046  | 3.127093  |
| C | 3.416046  | 2.392951  | 3.127093  |
| C | 4.154806  | -0.364319 | 3.127094  |
| C | 3.780347  | -1.761903 | 3.127094  |
| C | 1.761902  | -3.780348 | 3.127094  |
| C | 0.364319  | -4.154806 | 3.127094  |
| C | -2.392951 | -3.416046 | 3.127093  |
| C | -3.416046 | -2.392951 | 3.127093  |
| C | -4.154806 | 0.364319  | 3.127094  |
| C | -3.780347 | 1.761902  | 3.127094  |
| C | 0.363933  | 4.155633  | 4.374358  |
| C | 1.762650  | 3.780871  | 4.374358  |
| C | 3.780871  | 1.762650  | 4.374358  |
| C | 4.155634  | 0.363933  | 4.374358  |
| C | 3.416956  | -2.393032 | 4.374358  |
| C | 2.393031  | -3.416957 | 4.374358  |
| C | -0.363934 | -4.155634 | 4.374358  |
| C | -1.762651 | -3.780872 | 4.374358  |
| C | -3.780872 | -1.762651 | 4.374358  |
| C | -4.155634 | -0.363934 | 4.374358  |
| C | -3.416957 | 2.393031  | 4.374358  |
| C | -2.393032 | 3.416956  | 4.374358  |
| C | 2.392622  | 3.412503  | 5.625303  |
| C | 3.412503  | 2.392622  | 5.625303  |
| C | 4.151576  | -0.365805 | 5.625303  |
| C | 3.778293  | -1.758999 | 5.625302  |
| C | 1.758999  | -3.778294 | 5.625303  |
| C | 0.365805  | -4.151576 | 5.625303  |
| C | -2.392622 | -3.412504 | 5.625303  |
| C | -3.412504 | -2.392622 | 5.625303  |
| C | -4.151576 | 0.365805  | 5.625303  |

|   |           |           |           |
|---|-----------|-----------|-----------|
| C | -3.778294 | 1.758999  | 5.625303  |
| C | -1.758999 | 3.778293  | 5.625302  |
| C | -0.365805 | 4.151576  | 5.625303  |
| C | 3.780054  | 1.761481  | 6.877744  |
| C | 4.154341  | 0.364537  | 6.877744  |
| C | 3.415534  | -2.392908 | 6.877744  |
| C | 2.392908  | -3.415535 | 6.877744  |
| C | -0.364537 | -4.154342 | 6.877744  |
| C | -1.761481 | -3.780054 | 6.877744  |
| C | -3.780054 | -1.761481 | 6.877744  |
| C | -4.154342 | -0.364537 | 6.877744  |
| C | -3.415535 | 2.392908  | 6.877744  |
| C | -2.392908 | 3.415534  | 6.877744  |
| C | 0.364537  | 4.154341  | 6.877744  |
| C | 1.761481  | 3.780054  | 6.877744  |
| C | 4.155982  | -0.363773 | 8.125153  |
| C | 3.781093  | -1.762964 | 8.125153  |
| C | 1.762964  | -3.781093 | 8.125153  |
| C | 0.363773  | -4.155983 | 8.125153  |
| C | -2.393067 | -3.417339 | 8.125153  |
| C | -3.417339 | -2.393067 | 8.125153  |
| C | -4.155983 | 0.363773  | 8.125153  |
| C | -3.781093 | 1.762964  | 8.125153  |
| C | -1.762964 | 3.781093  | 8.125153  |
| C | -0.363773 | 4.155982  | 8.125153  |
| C | 2.393067  | 3.417339  | 8.125153  |
| C | 3.417339  | 2.393067  | 8.125153  |
| C | 3.412675  | -2.392637 | 9.375514  |
| C | 2.392636  | -3.412675 | 9.375514  |
| C | -0.365732 | -4.151732 | 9.375514  |
| C | -1.759140 | -3.778391 | 9.375514  |
| C | -3.778391 | -1.759140 | 9.375514  |
| C | -4.151732 | -0.365732 | 9.375514  |
| C | -3.412675 | 2.392636  | 9.375514  |
| C | -2.392637 | 3.412675  | 9.375514  |
| C | 0.365731  | 4.151731  | 9.375514  |
| C | 1.759140  | 3.778391  | 9.375514  |
| C | 3.778391  | 1.759140  | 9.375514  |
| C | 4.151731  | 0.365731  | 9.375514  |
| C | 1.761037  | -3.779747 | 10.628341 |
| C | 0.364768  | -4.153854 | 10.628341 |
| C | -2.392864 | -3.414996 | 10.628341 |
| C | -3.414996 | -2.392864 | 10.628341 |
| C | -4.153854 | 0.364768  | 10.628341 |
| C | -3.779747 | 1.761037  | 10.628341 |
| C | -1.761037 | 3.779747  | 10.628341 |
| C | -0.364768 | 4.153853  | 10.628341 |
| C | 2.392863  | 3.414996  | 10.628341 |
| C | 3.414996  | 2.392863  | 10.628341 |
| C | 4.153853  | -0.364768 | 10.628341 |
| C | 3.779747  | -1.761037 | 10.628341 |
| C | -0.363638 | -4.156280 | 11.875989 |
| C | -1.763230 | -3.781283 | 11.875989 |
| C | -3.781283 | -1.763230 | 11.875989 |
| C | -4.156280 | -0.363639 | 11.875989 |
| C | -3.417664 | 2.393099  | 11.875989 |
| C | -2.393099 | 3.417664  | 11.875989 |
| C | 0.363638  | 4.156279  | 11.875989 |
| C | 1.763229  | 3.781283  | 11.875989 |
| C | 3.781283  | 1.763229  | 11.875989 |
| C | 4.156279  | 0.363638  | 11.875989 |
| C | 3.417664  | -2.393099 | 11.875989 |
| C | 2.393099  | -3.417664 | 11.875989 |
| C | -2.392657 | -3.412930 | 13.125738 |
| C | -3.412929 | -2.392657 | 13.125738 |
| C | -4.151962 | 0.365622  | 13.125738 |
| C | -3.778536 | 1.759350  | 13.125738 |
| C | -1.759350 | 3.778536  | 13.125738 |
| C | -0.365622 | 4.151962  | 13.125738 |
| C | 2.392657  | 3.412929  | 13.125738 |

|   |           |           |           |
|---|-----------|-----------|-----------|
| C | 3.412929  | 2.392657  | 13.125738 |
| C | 4.151962  | -0.365622 | 13.125738 |
| C | 3.778536  | -1.759350 | 13.125738 |
| C | 1.759350  | -3.778536 | 13.125738 |
| C | 0.365622  | -4.151962 | 13.125738 |
| C | -3.779429 | -1.760576 | 14.378882 |
| C | -4.153348 | -0.365008 | 14.378882 |
| C | -3.414438 | 2.392818  | 14.378882 |
| C | -2.392818 | 3.414438  | 14.378882 |
| C | 0.365008  | 4.153348  | 14.378882 |
| C | 1.760576  | 3.779429  | 14.378882 |
| C | 3.779429  | 1.760576  | 14.378882 |
| C | 4.153348  | 0.365007  | 14.378882 |
| C | 3.414438  | -2.392818 | 14.378882 |
| C | 2.392818  | -3.414438 | 14.378882 |
| C | -0.365008 | -4.153348 | 14.378882 |
| C | -1.760576 | -3.779429 | 14.378882 |
| C | -4.156520 | 0.363531  | 15.626862 |
| C | -3.781438 | 1.763442  | 15.626862 |
| C | -1.763443 | 3.781438  | 15.626862 |
| C | -0.363531 | 4.156520  | 15.626862 |
| C | 2.393127  | 3.417926  | 15.626862 |
| C | 3.417926  | 2.393127  | 15.626862 |
| C | 4.156520  | -0.363531 | 15.626862 |
| C | 3.781438  | -1.763443 | 15.626862 |
| C | 1.763442  | -3.781438 | 15.626862 |
| C | 0.363531  | -4.156520 | 15.626862 |
| C | -2.393127 | -3.417927 | 15.626862 |
| C | -3.417926 | -2.393127 | 15.626862 |
| C | -3.413265 | 2.392684  | 16.875978 |
| C | -2.392684 | 3.413265  | 16.875978 |
| C | 0.365478  | 4.152266  | 16.875977 |
| C | 1.759628  | 3.778728  | 16.875977 |
| C | 3.778728  | 1.759628  | 16.875977 |
| C | 4.152266  | 0.365478  | 16.875977 |
| C | 3.413265  | -2.392684 | 16.875978 |
| C | 2.392684  | -3.413265 | 16.875978 |
| C | -0.365478 | -4.152267 | 16.875977 |
| C | -1.759628 | -3.778728 | 16.875977 |
| C | -3.778728 | -1.759628 | 16.875977 |
| C | -4.152267 | -0.365478 | 16.875977 |
| C | -1.760102 | 3.779102  | 18.129365 |
| C | -0.365254 | 4.152828  | 18.129365 |
| C | 2.392772  | 3.413864  | 18.129364 |
| C | 3.413864  | 2.392772  | 18.129364 |
| C | 4.152828  | -0.365254 | 18.129365 |
| C | 3.779102  | -1.760102 | 18.129365 |
| C | 1.760102  | -3.779102 | 18.129365 |
| C | 0.365254  | -4.152828 | 18.129365 |
| C | -2.392772 | -3.413864 | 18.129365 |
| C | -3.413864 | -2.392772 | 18.129365 |
| C | -4.152828 | 0.365254  | 18.129365 |
| C | -3.779102 | 1.760102  | 18.129365 |
| C | 0.363453  | 4.156702  | 19.377770 |
| C | 1.763602  | 3.781556  | 19.377770 |
| C | 3.781557  | 1.763602  | 19.377770 |
| C | 4.156702  | 0.363453  | 19.377770 |
| C | 3.418122  | -2.393149 | 19.377771 |
| C | 2.393149  | -3.418122 | 19.377771 |
| C | -0.363453 | -4.156702 | 19.377770 |
| C | -1.763602 | -3.781557 | 19.377770 |
| C | -3.781557 | -1.763602 | 19.377770 |
| C | -4.156702 | -0.363453 | 19.377770 |
| C | -3.418122 | 2.393149  | 19.377771 |
| C | -2.393149 | 3.418122  | 19.377771 |
| C | 2.392718  | 3.413683  | 20.626234 |
| C | 3.413683  | 2.392718  | 20.626234 |
| C | 4.152643  | -0.365297 | 20.626234 |
| C | 3.778963  | -1.759972 | 20.626234 |
| C | 1.759972  | -3.778963 | 20.626234 |

|   |           |           |           |
|---|-----------|-----------|-----------|
| C | 0.365297  | -4.152644 | 20.626234 |
| C | -2.392718 | -3.413683 | 20.626234 |
| C | -3.413683 | -2.392718 | 20.626234 |
| C | -4.152644 | 0.365297  | 20.626234 |
| C | -3.778963 | 1.759972  | 20.626234 |
| C | -1.759972 | 3.778963  | 20.626234 |
| C | -0.365297 | 4.152643  | 20.626234 |
| C | 3.778766  | 1.759615  | 21.879790 |
| C | 4.152292  | 0.365509  | 21.879790 |
| C | 3.413271  | -2.392722 | 21.879790 |
| C | 2.392722  | -3.413271 | 21.879790 |
| C | -0.365509 | -4.152292 | 21.879790 |
| C | -1.759615 | -3.778766 | 21.879790 |
| C | -3.778766 | -1.759615 | 21.879790 |
| C | -4.152292 | -0.365509 | 21.879790 |
| C | -3.413271 | 2.392722  | 21.879790 |
| C | -2.392722 | 3.413271  | 21.879790 |
| C | 0.365509  | 4.152292  | 21.879790 |
| C | 1.759615  | 3.778766  | 21.879790 |
| C | 4.156823  | -0.363401 | 23.128719 |
| C | 3.781635  | -1.763704 | 23.128719 |
| C | 1.763704  | -3.781635 | 23.128719 |
| C | 0.363401  | -4.156823 | 23.128719 |
| C | -2.393168 | -3.418255 | 23.128718 |
| C | -3.418255 | -2.393168 | 23.128718 |
| C | -4.156823 | 0.363401  | 23.128719 |
| C | -3.781635 | 1.763704  | 23.128719 |
| C | -1.763704 | 3.781635  | 23.128719 |
| C | -0.363401 | 4.156823  | 23.128719 |
| C | 2.393168  | 3.418255  | 23.128718 |
| C | 3.418255  | 2.393168  | 23.128718 |
| C | 3.414183  | -2.392753 | 24.376509 |
| C | 2.392753  | -3.414183 | 24.376509 |
| C | -0.365081 | -4.153098 | 24.376508 |
| C | -1.760390 | -3.779249 | 24.376508 |
| C | -3.779249 | -1.760390 | 24.376508 |
| C | -4.153098 | -0.365081 | 24.376508 |
| C | -3.414183 | 2.392753  | 24.376509 |
| C | -2.392753 | 3.414183  | 24.376509 |
| C | 0.365081  | 4.153098  | 24.376508 |
| C | 1.760390  | 3.779249  | 24.376508 |
| C | 3.779249  | 1.760390  | 24.376508 |
| C | 4.153098  | 0.365081  | 24.376508 |
| C | 1.759100  | -3.778409 | 25.630158 |
| C | 0.365772  | -4.151729 | 25.630158 |
| C | -2.392675 | -3.412654 | 25.630157 |
| C | -3.412654 | -2.392675 | 25.630157 |
| C | -4.151729 | 0.365772  | 25.630158 |
| C | -3.778409 | 1.759100  | 25.630158 |
| C | -1.759100 | 3.778409  | 25.630158 |
| C | -0.365772 | 4.151729  | 25.630157 |
| C | 2.392675  | 3.412654  | 25.630157 |
| C | 3.412654  | 2.392675  | 25.630157 |
| C | 4.151729  | -0.365772 | 25.630157 |
| C | 3.778409  | -1.759100 | 25.630158 |
| C | -0.363381 | -4.156889 | 26.879723 |
| C | -1.763762 | -3.781683 | 26.879723 |
| C | -3.781683 | -1.763762 | 26.879723 |
| C | -4.156889 | -0.363381 | 26.879723 |
| C | -3.418318 | 2.393176  | 26.879723 |
| C | -2.393176 | 3.418319  | 26.879723 |
| C | 0.363381  | 4.156889  | 26.879723 |
| C | 1.763762  | 3.781684  | 26.879723 |
| C | 3.781684  | 1.763762  | 26.879723 |
| C | 4.156889  | 0.363381  | 26.879723 |
| C | 3.418319  | -2.393176 | 26.879723 |
| C | 2.393176  | -3.418318 | 26.879723 |
| C | -2.392801 | -3.414794 | 28.126797 |
| C | -3.414794 | -2.392801 | 28.126797 |
| C | -4.153642 | 0.364811  | 28.126797 |



|   |           |           |           |
|---|-----------|-----------|-----------|
| C | -3.779584 | 1.760888  | 28.126797 |
| C | -1.760888 | 3.779584  | 28.126797 |
| C | -0.364811 | 4.153642  | 28.126797 |
| C | 2.392801  | 3.414794  | 28.126797 |
| C | 3.414794  | 2.392801  | 28.126797 |
| C | 4.153642  | -0.364811 | 28.126797 |
| C | 3.779584  | -1.760888 | 28.126797 |
| C | 1.760888  | -3.779584 | 28.126797 |
| C | 0.364811  | -4.153642 | 28.126797 |
| C | -3.778013 | -1.758536 | 29.380460 |
| C | -4.151098 | -0.366070 | 29.380459 |
| C | -3.411953 | 2.392605  | 29.380459 |
| C | -2.392605 | 3.411953  | 29.380459 |
| C | 0.366070  | 4.151098  | 29.380459 |
| C | 1.758536  | 3.778013  | 29.380459 |
| C | 3.778013  | 1.758536  | 29.380459 |
| C | 4.151098  | 0.366070  | 29.380459 |
| C | 3.411953  | -2.392605 | 29.380459 |
| C | 2.392605  | -3.411953 | 29.380459 |
| C | -0.366070 | -4.151098 | 29.380459 |
| C | -1.758536 | -3.778013 | 29.380460 |
| C | -4.156869 | 0.363369  | 30.630826 |
| C | -3.781657 | 1.763750  | 30.630826 |
| C | -1.763750 | 3.781657  | 30.630826 |
| C | -0.363369 | 4.156869  | 30.630826 |
| C | 2.393169  | 3.418313  | 30.630826 |
| C | 3.418313  | 2.393169  | 30.630826 |
| C | 4.156869  | -0.363369 | 30.630826 |
| C | 3.781657  | -1.763750 | 30.630826 |
| C | 1.763750  | -3.781657 | 30.630826 |
| C | 0.363369  | -4.156868 | 30.630826 |
| C | -2.393169 | -3.418313 | 30.630826 |
| C | -3.418313 | -2.393169 | 30.630826 |
| C | -3.415519 | 2.392815  | 31.877091 |
| C | -2.392815 | 3.415520  | 31.877091 |
| C | 0.364470  | 4.154290  | 31.877091 |
| C | 1.761521  | 3.779978  | 31.877091 |
| C | 3.779978  | 1.761521  | 31.877091 |
| C | 4.154290  | 0.364470  | 31.877091 |
| C | 3.415520  | -2.392815 | 31.877091 |
| C | 2.392815  | -3.415519 | 31.877091 |
| C | -0.364470 | -4.154290 | 31.877091 |
| C | -1.761521 | -3.779978 | 31.877091 |
| C | -3.779978 | -1.761521 | 31.877091 |
| C | -4.154290 | -0.364470 | 31.877091 |
| C | -1.757827 | 3.777521  | 33.130673 |
| C | -0.366426 | 4.150327  | 33.130673 |
| C | 2.392546  | 3.411115  | 33.130674 |
| C | 3.411115  | 2.392546  | 33.130674 |
| C | 4.150327  | -0.366426 | 33.130673 |
| C | 3.777521  | -1.757827 | 33.130673 |
| C | 1.757827  | -3.777521 | 33.130673 |
| C | 0.366426  | -4.150327 | 33.130674 |
| C | -2.392545 | -3.411114 | 33.130674 |
| C | -3.411114 | -2.392545 | 33.130674 |
| C | -4.150327 | 0.366426  | 33.130674 |
| C | -3.777521 | 1.757827  | 33.130673 |
| C | 0.363409  | 4.157069  | 34.382164 |
| C | 1.763832  | 3.781854  | 34.382166 |
| C | 3.781854  | 1.763832  | 34.382166 |
| C | 4.157069  | 0.363409  | 34.382164 |
| C | 3.418459  | -2.393285 | 34.382162 |
| C | 2.393285  | -3.418458 | 34.382162 |
| C | -0.363409 | -4.157069 | 34.382164 |
| C | -1.763832 | -3.781853 | 34.382166 |
| C | -3.781853 | -1.763832 | 34.382166 |
| C | -4.157069 | -0.363409 | 34.382164 |
| C | -3.418458 | 2.393285  | 34.382162 |
| C | -2.393285 | 3.418459  | 34.382162 |
| C | 2.393264  | 3.417146  | 35.627337 |

|   |           |           |           |
|---|-----------|-----------|-----------|
| C | 3.417146  | 2.393264  | 35.627337 |
| C | 4.155905  | -0.364034 | 35.627334 |
| C | 3.781156  | -1.762691 | 35.627331 |
| C | 1.762691  | -3.781156 | 35.627331 |
| C | 0.364034  | -4.155905 | 35.627334 |
| C | -2.393264 | -3.417146 | 35.627337 |
| C | -3.417146 | -2.393264 | 35.627337 |
| C | -4.155905 | 0.364034  | 35.627334 |
| C | -3.781156 | 1.762692  | 35.627331 |
| C | -1.762691 | 3.781156  | 35.627331 |
| C | -0.364034 | 4.155905  | 35.627333 |
| C | 3.777435  | 1.756906  | 36.880556 |
| C | 4.149782  | 0.367193  | 36.880553 |
| C | 3.410251  | -2.392919 | 36.880549 |
| C | 2.392920  | -3.410251 | 36.880549 |
| C | -0.367193 | -4.149782 | 36.880553 |
| C | -1.756906 | -3.777435 | 36.880556 |
| C | -3.777435 | -1.756906 | 36.880556 |
| C | -4.149782 | -0.367193 | 36.880553 |
| C | -3.410251 | 2.392920  | 36.880549 |
| C | -2.392919 | 3.410251  | 36.880549 |
| C | 0.367193  | 4.149782  | 36.880553 |
| C | 1.756906  | 3.777435  | 36.880556 |
| C | 4.155966  | -0.363320 | 38.133955 |
| C | 3.780851  | -1.763342 | 38.133951 |
| C | 1.763342  | -3.780850 | 38.133951 |
| C | 0.363321  | -4.155965 | 38.133955 |
| C | -2.392669 | -3.417550 | 38.133961 |
| C | -3.417550 | -2.392669 | 38.133961 |
| C | -4.155966 | 0.363321  | 38.133955 |
| C | -3.780850 | 1.763342  | 38.133951 |
| C | -1.763342 | 3.780851  | 38.133951 |
| C | -0.363320 | 4.155966  | 38.133955 |
| C | 2.392670  | 3.417551  | 38.133960 |
| C | 3.417551  | 2.392670  | 38.133960 |
| C | 3.414506  | -2.389817 | 39.377194 |
| C | 2.389817  | -3.414506 | 39.377194 |
| C | -0.362376 | -4.151913 | 39.377202 |
| C | -1.762135 | -3.776864 | 39.377206 |
| C | -3.776864 | -1.762135 | 39.377206 |
| C | -4.151913 | -0.362376 | 39.377202 |
| C | -3.414506 | 2.389817  | 39.377194 |
| C | -2.389817 | 3.414506  | 39.377194 |
| C | 0.362377  | 4.151913  | 39.377202 |
| C | 1.762135  | 3.776864  | 39.377206 |
| C | 3.776864  | 1.762135  | 39.377206 |
| C | 4.151913  | 0.362377  | 39.377202 |
| C | 1.749085  | -3.763212 | 40.629942 |
| C | 0.366851  | -4.133571 | 40.629952 |
| C | -2.384502 | -3.396363 | 40.629960 |
| C | -3.396363 | -2.384502 | 40.629960 |
| C | -4.133571 | 0.366851  | 40.629952 |
| C | -3.763212 | 1.749085  | 40.629942 |
| C | -1.749084 | 3.763213  | 40.629942 |
| C | -0.366850 | 4.133571  | 40.629952 |
| C | 2.384503  | 3.396363  | 40.629959 |
| C | 3.396363  | 2.384503  | 40.629959 |
| C | 4.133571  | -0.366850 | 40.629952 |
| C | 3.763213  | -1.749084 | 40.629942 |
| C | -0.359507 | -4.146118 | 41.891735 |
| C | -1.761697 | -3.770405 | 41.891733 |
| C | -3.770405 | -1.761696 | 41.891733 |
| C | -4.146119 | -0.359507 | 41.891735 |
| C | -3.410920 | 2.384452  | 41.891709 |
| C | -2.384452 | 3.410921  | 41.891709 |
| C | 0.359508  | 4.146119  | 41.891735 |
| C | 1.761697  | 3.770406  | 41.891733 |
| C | 3.770406  | 1.761697  | 41.891733 |
| C | 4.146119  | 0.359508  | 41.891735 |
| C | 3.410921  | -2.384452 | 41.891709 |

|   |           |           |            |
|---|-----------|-----------|------------|
| C | 2.384452  | -3.410920 | 41.891709  |
| C | -2.413308 | -3.453483 | 43.131836  |
| C | -3.453483 | -2.413308 | 43.131836  |
| C | -4.197422 | 0.363260  | 43.131834  |
| C | -3.816745 | 1.784181  | 43.131810  |
| C | -1.784181 | 3.816745  | 43.131810  |
| C | -0.363260 | 4.197422  | 43.131834  |
| C | 2.413309  | 3.453483  | 43.131836  |
| C | 3.453483  | 2.413309  | 43.131836  |
| C | 4.197422  | -0.363260 | 43.131834  |
| C | 3.816745  | -1.784181 | 43.131810  |
| C | 1.784181  | -3.816744 | 43.131810  |
| C | 0.363260  | -4.197422 | 43.131834  |
| C | -3.889948 | -1.759085 | 44.346476  |
| C | -4.248313 | -0.421521 | 44.346477  |
| C | -3.468520 | 2.489364  | 44.346439  |
| C | -2.489363 | 3.468520  | 44.346439  |
| C | 0.421521  | 4.248313  | 44.346477  |
| C | 1.759085  | 3.889949  | 44.346476  |
| C | 3.889949  | 1.759086  | 44.346476  |
| C | 4.248313  | 0.421521  | 44.346477  |
| C | 3.468520  | -2.489363 | 44.346439  |
| C | 2.489363  | -3.468520 | 44.346439  |
| C | -0.421521 | -4.248313 | 44.346477  |
| C | -1.759085 | -3.889948 | 44.346476  |
| H | -4.446507 | -0.078607 | -45.303297 |
| H | -3.811534 | 2.291309  | -45.303296 |
| H | -2.291308 | 3.811534  | -45.303296 |
| H | 0.078607  | 4.446508  | -45.303297 |
| H | 2.155376  | 3.890290  | -45.303246 |
| H | 3.890289  | 2.155376  | -45.303246 |
| H | 4.446507  | 0.078607  | -45.303297 |
| H | 3.811534  | -2.291308 | -45.303296 |
| H | 2.291309  | -3.811534 | -45.303296 |
| H | -0.078607 | -4.446507 | -45.303297 |
| H | -2.155376 | -3.890289 | -45.303246 |
| H | -3.890289 | -2.155376 | -45.303246 |
| H | -3.811534 | -2.291308 | 45.303296  |
| H | -4.446507 | 0.078607  | 45.303297  |
| H | -3.890289 | 2.155376  | 45.303246  |
| H | -2.155376 | 3.890289  | 45.303246  |
| H | -0.078607 | 4.446507  | 45.303297  |
| H | 2.291308  | 3.811534  | 45.303296  |
| H | 3.811534  | 2.291309  | 45.303296  |
| H | 4.446507  | -0.078607 | 45.303297  |
| H | 3.890289  | -2.155376 | 45.303246  |
| H | 2.155376  | -3.890289 | 45.303246  |
| H | 0.078607  | -4.446507 | 45.303297  |
| H | -2.291308 | -3.811534 | 45.303296  |

Nanotube (6,6) u36v6s  
B3LYP/STO-3G Energy: -32993.626767

|   |           |           |            |
|---|-----------|-----------|------------|
| C | -0.691910 | 4.212187  | -44.977618 |
| C | 0.691911  | 4.212187  | -44.977618 |
| C | 3.302201  | 2.705442  | -44.977546 |
| C | 3.994103  | 1.507013  | -44.977543 |
| C | 3.994103  | -1.507000 | -44.977544 |
| C | 3.302201  | -2.705429 | -44.977548 |
| C | 0.691911  | -4.212174 | -44.977620 |
| C | -0.691909 | -4.212174 | -44.977620 |
| C | -3.302199 | -2.705429 | -44.977548 |
| C | -3.994101 | -1.507000 | -44.977545 |
| C | -3.994101 | 1.507013  | -44.977544 |
| C | -3.302199 | 2.705442  | -44.977546 |
| C | 1.437299  | 3.958957  | -43.762008 |
| C | 2.710012  | 3.224249  | -43.761975 |
| C | 4.147269  | 0.734781  | -43.761965 |

|   |           |           |            |
|---|-----------|-----------|------------|
| C | 4.147269  | -0.734768 | -43.761965 |
| C | 2.710012  | -3.224237 | -43.761977 |
| C | 1.437299  | -3.958945 | -43.762010 |
| C | -1.437298 | -3.958945 | -43.762010 |
| C | -2.710011 | -3.224237 | -43.761978 |
| C | -4.147267 | -0.734768 | -43.761966 |
| C | -4.147267 | 0.734781  | -43.761965 |
| C | -2.710011 | 3.224249  | -43.761976 |
| C | -1.437298 | 3.958957  | -43.762008 |
| C | 3.185902  | 2.677720  | -42.521732 |
| C | 3.911909  | 1.420197  | -42.521730 |
| C | 3.911909  | -1.420185 | -42.521731 |
| C | 3.185902  | -2.677709 | -42.521734 |
| C | 0.726025  | -4.097872 | -42.521776 |
| C | -0.726023 | -4.097872 | -42.521776 |
| C | -3.185900 | -2.677709 | -42.521734 |
| C | -3.911908 | -1.420185 | -42.521731 |
| C | -3.911908 | 1.420197  | -42.521730 |
| C | -3.185900 | 2.677720  | -42.521732 |
| C | -0.726023 | 4.097883  | -42.521774 |
| C | 0.726024  | 4.097883  | -42.521774 |
| C | 4.087004  | 0.715175  | -41.260536 |
| C | 4.087004  | -0.715164 | -41.260536 |
| C | 2.662869  | -3.181883 | -41.260550 |
| C | 1.424143  | -3.897050 | -41.260566 |
| C | -1.424142 | -3.897050 | -41.260566 |
| C | -2.662868 | -3.181883 | -41.260550 |
| C | -4.087003 | -0.715164 | -41.260537 |
| C | -4.087003 | 0.715175  | -41.260536 |
| C | -2.662868 | 3.181894  | -41.260548 |
| C | -1.424142 | 3.897060  | -41.260564 |
| C | 1.424143  | 3.897060  | -41.260564 |
| C | 2.662869  | 3.181894  | -41.260548 |
| C | 3.915052  | -1.424682 | -40.006757 |
| C | 3.191352  | -2.678211 | -40.006763 |
| C | 0.723718  | -4.102882 | -40.006776 |
| C | -0.723717 | -4.102882 | -40.006776 |
| C | -3.191351 | -2.678211 | -40.006763 |
| C | -3.915051 | -1.424682 | -40.006757 |
| C | -3.915051 | 1.424692  | -40.006756 |
| C | -3.191351 | 2.678221  | -40.006762 |
| C | -0.723717 | 4.102892  | -40.006773 |
| C | 0.723718  | 4.102892  | -40.006773 |
| C | 3.191352  | 2.678221  | -40.006761 |
| C | 3.915052  | 1.424692  | -40.006756 |
| C | 2.681956  | -3.195497 | -38.763210 |
| C | 1.426395  | -3.920380 | -38.763217 |
| C | -1.426394 | -3.920380 | -38.763217 |
| C | -2.681955 | -3.195497 | -38.763210 |
| C | -4.108312 | -0.724889 | -38.763203 |
| C | -4.108312 | 0.724898  | -38.763203 |
| C | -2.681955 | 3.195506  | -38.763208 |
| C | -1.426394 | 3.920389  | -38.763214 |
| C | 1.426395  | 3.920389  | -38.763214 |
| C | 2.681956  | 3.195506  | -38.763208 |
| C | 4.108313  | 0.724898  | -38.763203 |
| C | 4.108313  | -0.724889 | -38.763203 |
| C | 0.719176  | -4.102899 | -37.510663 |
| C | -0.719175 | -4.102899 | -37.510663 |
| C | -3.193636 | -2.674288 | -37.510655 |
| C | -3.912789 | -1.428618 | -37.510651 |
| C | -3.912789 | 1.428627  | -37.510651 |
| C | -3.193636 | 2.674296  | -37.510654 |
| C | -0.719175 | 4.102907  | -37.510660 |
| C | 0.719176  | 4.102907  | -37.510660 |
| C | 3.193637  | 2.674296  | -37.510653 |
| C | 3.912790  | 1.428627  | -37.510650 |
| C | 3.912790  | -1.428618 | -37.510651 |
| C | 3.193637  | -2.674288 | -37.510655 |
| C | -1.427385 | -3.918334 | -36.256475 |

|   |           |           |            |
|---|-----------|-----------|------------|
| C | -2.679683 | -3.195336 | -36.256472 |
| C | -4.107029 | -0.723004 | -36.256466 |
| C | -4.107029 | 0.723012  | -36.256466 |
| C | -2.679683 | 3.195343  | -36.256470 |
| C | -1.427385 | 3.918341  | -36.256473 |
| C | 1.427386  | 3.918341  | -36.256473 |
| C | 2.679684  | 3.195343  | -36.256470 |
| C | 4.107030  | 0.723012  | -36.256465 |
| C | 4.107030  | -0.723004 | -36.256466 |
| C | 2.679684  | -3.195336 | -36.256472 |
| C | 1.427386  | -3.918334 | -36.256475 |
| C | -3.196320 | -2.682637 | -35.010713 |
| C | -3.921356 | -1.426778 | -35.010711 |
| C | -3.921356 | 1.426785  | -35.010710 |
| C | -3.196321 | 2.682643  | -35.010711 |
| C | -0.725060 | 4.109404  | -35.010714 |
| C | 0.725060  | 4.109404  | -35.010714 |
| C | 3.196321  | 2.682643  | -35.010711 |
| C | 3.921357  | 1.426785  | -35.010709 |
| C | 3.921357  | -1.426778 | -35.010710 |
| C | 3.196321  | -2.682637 | -35.010712 |
| C | 0.725060  | -4.109397 | -35.010716 |
| C | -0.725060 | -4.109397 | -35.010716 |
| C | -4.103474 | -0.720240 | -33.760299 |
| C | -4.103474 | 0.720245  | -33.760298 |
| C | -2.675508 | 3.193644  | -33.760298 |
| C | -1.427999 | 3.913876  | -33.760299 |
| C | 1.428000  | 3.913876  | -33.760298 |
| C | 2.675509  | 3.193644  | -33.760297 |
| C | 4.103475  | 0.720245  | -33.760298 |
| C | 4.103475  | -0.720239 | -33.760299 |
| C | 2.675509  | -3.193638 | -33.760299 |
| C | 1.428000  | -3.913870 | -33.760301 |
| C | -1.427999 | -3.913870 | -33.760301 |
| C | -2.675508 | -3.193638 | -33.760300 |
| C | -3.916481 | 1.427419  | -32.505905 |
| C | -3.194436 | 2.678095  | -32.505905 |
| C | -0.722067 | 4.105494  | -32.505904 |
| C | 0.722068  | 4.105494  | -32.505904 |
| C | 3.194436  | 2.678095  | -32.505905 |
| C | 3.916481  | 1.427419  | -32.505905 |
| C | 3.916481  | -1.427414 | -32.505906 |
| C | 3.194436  | -2.678090 | -32.505907 |
| C | 0.722068  | -4.105489 | -32.505906 |
| C | -0.722067 | -4.105489 | -32.505906 |
| C | -3.194436 | -2.678090 | -32.505907 |
| C | -3.916481 | -1.427414 | -32.505906 |
| C | -2.682354 | 3.196117  | -31.258715 |
| C | -1.426728 | 3.921034  | -31.258715 |
| C | 1.426728  | 3.921034  | -31.258715 |
| C | 2.682354  | 3.196117  | -31.258715 |
| C | 4.109043  | 0.724932  | -31.258716 |
| C | 4.109043  | -0.724927 | -31.258717 |
| C | 2.682354  | -3.196112 | -31.258717 |
| C | 1.426728  | -3.921030 | -31.258718 |
| C | -1.426728 | -3.921030 | -31.258718 |
| C | -2.682354 | -3.196112 | -31.258717 |
| C | -4.109042 | -0.724927 | -31.258717 |
| C | -4.109042 | 0.724932  | -31.258717 |
| C | -0.721008 | 4.104414  | -30.009584 |
| C | 0.721009  | 4.104414  | -30.009584 |
| C | 3.194035  | 2.676637  | -30.009584 |
| C | 3.915023  | 1.427796  | -30.009584 |
| C | 3.915023  | -1.427792 | -30.009585 |
| C | 3.194035  | -2.676634 | -30.009585 |
| C | 0.721009  | -4.104410 | -30.009586 |
| C | -0.721008 | -4.104410 | -30.009587 |
| C | -3.194035 | -2.676634 | -30.009586 |
| C | -3.915023 | -1.427792 | -30.009585 |
| C | -3.915023 | 1.427796  | -30.009584 |

|   |           |           |            |
|---|-----------|-----------|------------|
| C | -3.194035 | 2.676637  | -30.009584 |
| C | 1.427608  | 3.915694  | -28.755359 |
| C | 2.677288  | 3.194211  | -28.755360 |
| C | 4.104865  | 0.721497  | -28.755360 |
| C | 4.104865  | -0.721494 | -28.755360 |
| C | 2.677289  | -3.194209 | -28.755362 |
| C | 1.427608  | -3.915691 | -28.755362 |
| C | -1.427608 | -3.915691 | -28.755362 |
| C | -2.677288 | -3.194209 | -28.755362 |
| C | -4.104865 | -0.721494 | -28.755361 |
| C | -4.104865 | 0.721497  | -28.755360 |
| C | -2.677288 | 3.194211  | -28.755360 |
| C | -1.427608 | 3.915694  | -28.755359 |
| C | 3.196035  | 2.682125  | -27.507005 |
| C | 3.920775  | 1.426787  | -27.507006 |
| C | 3.920775  | -1.426785 | -27.507007 |
| C | 3.196035  | -2.682123 | -27.507007 |
| C | 0.724760  | -4.108883 | -27.507006 |
| C | -0.724760 | -4.108883 | -27.507006 |
| C | -3.196035 | -2.682123 | -27.507007 |
| C | -3.920775 | -1.426785 | -27.507007 |
| C | -3.920775 | 1.426787  | -27.507006 |
| C | -3.196035 | 2.682125  | -27.507005 |
| C | -0.724760 | 4.108885  | -27.507004 |
| C | 0.724760  | 4.108885  | -27.507004 |
| C | 4.105204  | 0.721676  | -26.258741 |
| C | 4.105204  | -0.721675 | -26.258742 |
| C | 2.677613  | -3.194409 | -26.258740 |
| C | 1.427621  | -3.916070 | -26.258740 |
| C | -1.427621 | -3.916070 | -26.258740 |
| C | -2.677613 | -3.194409 | -26.258740 |
| C | -4.105204 | -0.721675 | -26.258742 |
| C | -4.105204 | 0.721676  | -26.258741 |
| C | -2.677613 | 3.194410  | -26.258739 |
| C | -1.427621 | 3.916071  | -26.258738 |
| C | 1.427621  | 3.916071  | -26.258738 |
| C | 2.677613  | 3.194410  | -26.258738 |
| C | 3.915082  | -1.427731 | -25.004873 |
| C | 3.194010  | -2.676712 | -25.004873 |
| C | 0.721090  | -4.104422 | -25.004872 |
| C | -0.721090 | -4.104422 | -25.004872 |
| C | -3.194011 | -2.676712 | -25.004873 |
| C | -3.915082 | -1.427731 | -25.004874 |
| C | -3.915082 | 1.427731  | -25.004873 |
| C | -3.194011 | 2.676712  | -25.004872 |
| C | -0.721090 | 4.104422  | -25.004870 |
| C | 0.721090  | 4.104422  | -25.004870 |
| C | 3.194010  | 2.676712  | -25.004872 |
| C | 3.915082  | 1.427731  | -25.004872 |
| C | 2.681730  | -3.195894 | -23.755456 |
| C | 1.426853  | -3.920374 | -23.755456 |
| C | -1.426853 | -3.920374 | -23.755456 |
| C | -2.681730 | -3.195894 | -23.755456 |
| C | -4.108549 | -0.724496 | -23.755456 |
| C | -4.108549 | 0.724495  | -23.755455 |
| C | -2.681730 | 3.195893  | -23.755454 |
| C | -1.426853 | 3.920373  | -23.755454 |
| C | 1.426853  | 3.920373  | -23.755454 |
| C | 2.681730  | 3.195893  | -23.755454 |
| C | 4.108549  | 0.724496  | -23.755455 |
| C | 4.108549  | -0.724496 | -23.755456 |
| C | 0.722283  | -4.105940 | -22.507780 |
| C | -0.722283 | -4.105940 | -22.507780 |
| C | -3.194730 | -2.678506 | -22.507779 |
| C | -3.916995 | -1.427459 | -22.507780 |
| C | -3.916995 | 1.427458  | -22.507779 |
| C | -3.194731 | 2.678505  | -22.507778 |
| C | -0.722283 | 4.105939  | -22.507778 |
| C | 0.722283  | 4.105939  | -22.507778 |
| C | 3.194730  | 2.678505  | -22.507778 |

|   |           |           |            |
|---|-----------|-----------|------------|
| C | 3.916995  | 1.427458  | -22.507778 |
| C | 3.916995  | -1.427459 | -22.507779 |
| C | 3.194730  | -2.678506 | -22.507779 |
| C | -1.427811 | -3.914696 | -21.254428 |
| C | -2.676330 | -3.193888 | -21.254428 |
| C | -4.104115 | -0.720825 | -21.254428 |
| C | -4.104115 | 0.720823  | -21.254427 |
| C | -2.676330 | 3.193886  | -21.254426 |
| C | -1.427811 | 3.914694  | -21.254426 |
| C | 1.427811  | 3.914694  | -21.254426 |
| C | 2.676329  | 3.193886  | -21.254426 |
| C | 4.104114  | 0.720823  | -21.254427 |
| C | 4.104114  | -0.720825 | -21.254427 |
| C | 2.676329  | -3.193888 | -21.254428 |
| C | 1.427811  | -3.914696 | -21.254428 |
| C | -3.195698 | -2.681217 | -20.004036 |
| C | -3.919826 | -1.426945 | -20.004036 |
| C | -3.919826 | 1.426942  | -20.004035 |
| C | -3.195698 | 2.681215  | -20.004034 |
| C | -0.724146 | 4.108129  | -20.004033 |
| C | 0.724146  | 4.108129  | -20.004033 |
| C | 3.195697  | 2.681215  | -20.004034 |
| C | 3.919826  | 1.426942  | -20.004035 |
| C | 3.919826  | -1.426945 | -20.004036 |
| C | 3.195697  | -2.681217 | -20.004036 |
| C | 0.724146  | -4.108132 | -20.004035 |
| C | -0.724146 | -4.108132 | -20.004035 |
| C | -4.106594 | -0.722838 | -18.756710 |
| C | -4.106594 | 0.722834  | -18.756709 |
| C | -2.679313 | 3.195025  | -18.756707 |
| C | -1.427310 | 3.917844  | -18.756707 |
| C | 1.427309  | 3.917844  | -18.756706 |
| C | 2.679313  | 3.195025  | -18.756707 |
| C | 4.106594  | 0.722834  | -18.756709 |
| C | 4.106594  | -0.722838 | -18.756710 |
| C | 2.679313  | -3.195028 | -18.756709 |
| C | 1.427309  | -3.917848 | -18.756708 |
| C | -1.427310 | -3.917848 | -18.756709 |
| C | -2.679313 | -3.195028 | -18.756709 |
| C | -3.914497 | 1.427850  | -17.504005 |
| C | -3.193824 | 2.676138  | -17.504005 |
| C | -0.720691 | 4.103967  | -17.504004 |
| C | 0.720690  | 4.103967  | -17.504004 |
| C | 3.193823  | 2.676138  | -17.504005 |
| C | 3.914497  | 1.427850  | -17.504005 |
| C | 3.914497  | -1.427854 | -17.504006 |
| C | 3.193823  | -2.676143 | -17.504006 |
| C | 0.720690  | -4.103971 | -17.504006 |
| C | -0.720691 | -4.103971 | -17.504006 |
| C | -3.193823 | -2.676143 | -17.504006 |
| C | -3.914497 | -1.427854 | -17.504006 |
| C | -2.680596 | 3.195465  | -16.252737 |
| C | -1.427052 | 3.919173  | -16.252737 |
| C | 1.427051  | 3.919173  | -16.252737 |
| C | 2.680595  | 3.195465  | -16.252737 |
| C | 4.107617  | 0.723723  | -16.252737 |
| C | 4.107617  | -0.723728 | -16.252738 |
| C | 2.680595  | -3.195469 | -16.252739 |
| C | 1.427051  | -3.919178 | -16.252739 |
| C | -1.427052 | -3.919178 | -16.252739 |
| C | -2.680596 | -3.195469 | -16.252739 |
| C | -4.107618 | -0.723728 | -16.252738 |
| C | -4.107618 | 0.723723  | -16.252737 |
| C | -0.723322 | 4.107169  | -15.005531 |
| C | 0.723321  | 4.107169  | -15.005531 |
| C | 3.195281  | 2.680020  | -15.005530 |
| C | 3.918586  | 1.427175  | -15.005531 |
| C | 3.918586  | -1.427180 | -15.005531 |
| C | 3.195281  | -2.680025 | -15.005531 |
| C | 0.723322  | -4.107174 | -15.005533 |

|   |           |           |            |
|---|-----------|-----------|------------|
| C | -0.723322 | -4.107174 | -15.005533 |
| C | -3.195282 | -2.680025 | -15.005532 |
| C | -3.918587 | -1.427180 | -15.005531 |
| C | -3.918587 | 1.427175  | -15.005531 |
| C | -3.195282 | 2.680020  | -15.005530 |
| C | 1.427854  | 3.914493  | -13.753578 |
| C | 2.676137  | 3.193822  | -13.753578 |
| C | 4.103967  | 0.720684  | -13.753579 |
| C | 4.103967  | -0.720690 | -13.753579 |
| C | 2.676137  | -3.193828 | -13.753579 |
| C | 1.427854  | -3.914499 | -13.753579 |
| C | -1.427855 | -3.914499 | -13.753579 |
| C | -2.676138 | -3.193828 | -13.753579 |
| C | -4.103968 | -0.720690 | -13.753579 |
| C | -4.103968 | 0.720684  | -13.753579 |
| C | -2.676138 | 3.193822  | -13.753578 |
| C | -1.427855 | 3.914493  | -13.753578 |
| C | 3.195207  | 2.679898  | -12.501561 |
| C | 3.918444  | 1.427170  | -12.501562 |
| C | 3.918444  | -1.427177 | -12.501562 |
| C | 3.195207  | -2.679905 | -12.501562 |
| C | 0.723254  | -4.107050 | -12.501562 |
| C | -0.723254 | -4.107050 | -12.501562 |
| C | -3.195208 | -2.679905 | -12.501562 |
| C | -3.918445 | -1.427177 | -12.501562 |
| C | -3.918445 | 1.427170  | -12.501562 |
| C | -3.195208 | 2.679898  | -12.501561 |
| C | -0.723254 | 4.107043  | -12.501560 |
| C | 0.723254  | 4.107043  | -12.501560 |
| C | 4.107646  | 0.723720  | -11.254254 |
| C | 4.107646  | -0.723727 | -11.254255 |
| C | 2.680608  | -3.195495 | -11.254254 |
| C | 1.427067  | -3.919202 | -11.254254 |
| C | -1.427068 | -3.919202 | -11.254254 |
| C | -2.680609 | -3.195495 | -11.254254 |
| C | -4.107647 | -0.723727 | -11.254255 |
| C | -4.107647 | 0.723720  | -11.254255 |
| C | -2.680609 | 3.195488  | -11.254253 |
| C | -1.427068 | 3.919195  | -11.254253 |
| C | 1.427067  | 3.919195  | -11.254253 |
| C | 2.680608  | 3.195488  | -11.254253 |
| C | 3.914681  | -1.427826 | -10.003116 |
| C | 3.193890  | -2.676318 | -10.003116 |
| C | 0.720807  | -4.104116 | -10.003117 |
| C | -0.720808 | -4.104116 | -10.003117 |
| C | -3.193891 | -2.676318 | -10.003116 |
| C | -3.914682 | -1.427826 | -10.003116 |
| C | -3.914682 | 1.427819  | -10.003116 |
| C | -3.193891 | 2.676310  | -10.003116 |
| C | -0.720808 | 4.104108  | -10.003115 |
| C | 0.720807  | 4.104108  | -10.003115 |
| C | 3.193890  | 2.676310  | -10.003115 |
| C | 3.914681  | 1.427819  | -10.003116 |
| C | 2.679169  | -3.194939 | -8.750505  |
| C | 1.427303  | -3.917678 | -8.750505  |
| C | -1.427304 | -3.917678 | -8.750505  |
| C | -2.679169 | -3.194939 | -8.750505  |
| C | -4.106445 | -0.722760 | -8.750504  |
| C | -4.106445 | 0.722752  | -8.750503  |
| C | -2.679169 | 3.194931  | -8.750504  |
| C | -1.427304 | 3.917670  | -8.750504  |
| C | 1.427303  | 3.917670  | -8.750504  |
| C | 2.679169  | 3.194931  | -8.750504  |
| C | 4.106444  | 0.722752  | -8.750503  |
| C | 4.106444  | -0.722760 | -8.750504  |
| C | 0.724024  | -4.108004 | -7.502891  |
| C | -0.724025 | -4.108004 | -7.502891  |
| C | -3.195649 | -2.681051 | -7.502890  |
| C | -3.919657 | -1.426988 | -7.502890  |
| C | -3.919657 | 1.426980  | -7.502890  |



|   |           |           |           |
|---|-----------|-----------|-----------|
| C | -3.195649 | 2.681042  | -7.502889 |
| C | -0.724025 | 4.107996  | -7.502890 |
| C | 0.724024  | 4.107996  | -7.502890 |
| C | 3.195648  | 2.681042  | -7.502889 |
| C | 3.919656  | 1.426980  | -7.502890 |
| C | 3.919656  | -1.426988 | -7.502890 |
| C | 3.195648  | -2.681051 | -7.502890 |
| C | -1.427759 | -3.915045 | -6.252590 |
| C | -2.676658 | -3.194018 | -6.252589 |
| C | -4.104392 | -0.721048 | -6.252590 |
| C | -4.104392 | 0.721039  | -6.252590 |
| C | -2.676658 | 3.194009  | -6.252589 |
| C | -1.427759 | 3.915036  | -6.252589 |
| C | 1.427758  | 3.915036  | -6.252589 |
| C | 2.676657  | 3.194009  | -6.252589 |
| C | 4.104392  | 0.721039  | -6.252590 |
| C | 4.104392  | -0.721048 | -6.252590 |
| C | 2.676657  | -3.194018 | -6.252589 |
| C | 1.427758  | -3.915045 | -6.252589 |
| C | -3.194665 | -2.678443 | -4.999564 |
| C | -3.916908 | -1.427438 | -4.999564 |
| C | -3.916908 | 1.427429  | -4.999564 |
| C | -3.194665 | 2.678433  | -4.999564 |
| C | -0.722259 | 4.105840  | -4.999563 |
| C | 0.722259  | 4.105840  | -4.999563 |
| C | 3.194665  | 2.678433  | -4.999564 |
| C | 3.916907  | 1.427429  | -4.999564 |
| C | 3.916907  | -1.427438 | -4.999564 |
| C | 3.194665  | -2.678443 | -4.999564 |
| C | 0.722259  | -4.105849 | -4.999563 |
| C | -0.722259 | -4.105849 | -4.999563 |
| C | -4.108221 | -0.724217 | -3.751462 |
| C | -4.108221 | 0.724207  | -3.751462 |
| C | -2.681319 | 3.195740  | -3.751462 |
| C | -1.426933 | 3.919935  | -3.751462 |
| C | 1.426932  | 3.919935  | -3.751462 |
| C | 2.681318  | 3.195740  | -3.751462 |
| C | 4.108220  | 0.724207  | -3.751462 |
| C | 4.108220  | -0.724217 | -3.751462 |
| C | 2.681318  | -3.195749 | -3.751462 |
| C | 1.426932  | -3.919944 | -3.751462 |
| C | -1.426933 | -3.919944 | -3.751462 |
| C | -2.681319 | -3.195749 | -3.751462 |
| C | -3.915552 | 1.427663  | -2.501976 |
| C | -3.194191 | 2.677141  | -2.501976 |
| C | -0.721378 | 4.104783  | -2.501976 |
| C | 0.721377  | 4.104783  | -2.501976 |
| C | 3.194191  | 2.677141  | -2.501976 |
| C | 3.915551  | 1.427663  | -2.501976 |
| C | 3.915551  | -1.427673 | -2.501976 |
| C | 3.194191  | -2.677150 | -2.501976 |
| C | 0.721377  | -4.104793 | -2.501977 |
| C | -0.721378 | -4.104793 | -2.501977 |
| C | -3.194191 | -2.677150 | -2.501976 |
| C | -3.915552 | -1.427673 | -2.501976 |
| C | -2.677752 | 3.194408  | -1.248739 |
| C | -1.427559 | 3.916181  | -1.248739 |
| C | 1.427558  | 3.916181  | -1.248739 |
| C | 2.677751  | 3.194408  | -1.248739 |
| C | 4.105284  | 0.721786  | -1.248738 |
| C | 4.105284  | -0.721796 | -1.248738 |
| C | 2.677751  | -3.194418 | -1.248739 |
| C | 1.427558  | -3.916191 | -1.248739 |
| C | -1.427559 | -3.916191 | -1.248739 |
| C | -2.677752 | -3.194418 | -1.248739 |
| C | -4.105285 | -0.721796 | -1.248738 |
| C | -4.105285 | 0.721786  | -1.248738 |
| C | -0.724275 | 4.108287  | 0.000000  |
| C | 0.724274  | 4.108287  | 0.000000  |
| C | 3.195776  | 2.681404  | 0.000000  |

|   |           |           |          |
|---|-----------|-----------|----------|
| C | 3.920034  | 1.426909  | 0.000000 |
| C | 3.920034  | -1.426919 | 0.000000 |
| C | 3.195776  | -2.681414 | 0.000000 |
| C | 0.724274  | -4.108297 | 0.000000 |
| C | -0.724275 | -4.108297 | 0.000000 |
| C | -3.195777 | -2.681414 | 0.000000 |
| C | -3.920035 | -1.426919 | 0.000000 |
| C | -3.920035 | 1.426909  | 0.000000 |
| C | -3.195777 | 2.681404  | 0.000000 |
| C | 1.427558  | 3.916181  | 1.248739 |
| C | 2.677751  | 3.194408  | 1.248739 |
| C | 4.105284  | 0.721786  | 1.248738 |
| C | 4.105284  | -0.721796 | 1.248738 |
| C | 2.677751  | -3.194418 | 1.248739 |
| C | 1.427558  | -3.916191 | 1.248739 |
| C | -1.427559 | -3.916191 | 1.248739 |
| C | -2.677752 | -3.194418 | 1.248739 |
| C | -4.105285 | -0.721796 | 1.248738 |
| C | -4.105285 | 0.721786  | 1.248738 |
| C | -2.677752 | 3.194408  | 1.248739 |
| C | -1.427559 | 3.916181  | 1.248739 |
| C | 3.194191  | 2.677140  | 2.501976 |
| C | 3.915551  | 1.427663  | 2.501976 |
| C | 3.915551  | -1.427673 | 2.501976 |
| C | 3.194191  | -2.677150 | 2.501976 |
| C | 0.721377  | -4.104793 | 2.501977 |
| C | -0.721378 | -4.104793 | 2.501977 |
| C | -3.194191 | -2.677150 | 2.501976 |
| C | -3.915552 | -1.427673 | 2.501976 |
| C | -3.915552 | 1.427663  | 2.501976 |
| C | -3.194191 | 2.677140  | 2.501976 |
| C | -0.721378 | 4.104783  | 2.501977 |
| C | 0.721377  | 4.104783  | 2.501976 |
| C | 4.108221  | 0.724207  | 3.751462 |
| C | 4.108220  | -0.724217 | 3.751462 |
| C | 2.681318  | -3.195750 | 3.751462 |
| C | 1.426932  | -3.919944 | 3.751462 |
| C | -1.426933 | -3.919944 | 3.751462 |
| C | -2.681319 | -3.195750 | 3.751462 |
| C | -4.108221 | -0.724217 | 3.751462 |
| C | -4.108221 | 0.724207  | 3.751462 |
| C | -2.681319 | 3.195740  | 3.751462 |
| C | -1.426933 | 3.919934  | 3.751462 |
| C | 1.426932  | 3.919934  | 3.751462 |
| C | 2.681318  | 3.195740  | 3.751462 |
| C | 3.916907  | -1.427439 | 4.999564 |
| C | 3.194665  | -2.678443 | 4.999564 |
| C | 0.722259  | -4.105849 | 4.999563 |
| C | -0.722259 | -4.105849 | 4.999563 |
| C | -3.194665 | -2.678443 | 4.999564 |
| C | -3.916908 | -1.427439 | 4.999564 |
| C | -3.916908 | 1.427429  | 4.999564 |
| C | -3.194665 | 2.678433  | 4.999564 |
| C | -0.722259 | 4.105839  | 4.999563 |
| C | 0.722259  | 4.105839  | 4.999563 |
| C | 3.194665  | 2.678433  | 4.999564 |
| C | 3.916907  | 1.427429  | 4.999564 |
| C | 2.676657  | -3.194019 | 6.252589 |
| C | 1.427758  | -3.915045 | 6.252589 |
| C | -1.427759 | -3.915045 | 6.252589 |
| C | -2.676658 | -3.194019 | 6.252589 |
| C | -4.104392 | -0.721048 | 6.252590 |
| C | -4.104392 | 0.721038  | 6.252590 |
| C | -2.676658 | 3.194009  | 6.252589 |
| C | -1.427759 | 3.915035  | 6.252589 |
| C | 1.427758  | 3.915035  | 6.252589 |
| C | 2.676657  | 3.194009  | 6.252589 |
| C | 4.104392  | 0.721038  | 6.252590 |
| C | 4.104392  | -0.721048 | 6.252590 |
| C | 0.724025  | -4.108005 | 7.502891 |

|   |           |           |           |
|---|-----------|-----------|-----------|
| C | -0.724025 | -4.108005 | 7.502891  |
| C | -3.195649 | -2.681051 | 7.502890  |
| C | -3.919657 | -1.426989 | 7.502890  |
| C | -3.919657 | 1.426979  | 7.502890  |
| C | -3.195649 | 2.681042  | 7.502890  |
| C | -0.724025 | 4.107995  | 7.502890  |
| C | 0.724025  | 4.107995  | 7.502890  |
| C | 3.195648  | 2.681041  | 7.502890  |
| C | 3.919656  | 1.426979  | 7.502890  |
| C | 3.919656  | -1.426989 | 7.502890  |
| C | 3.195648  | -2.681051 | 7.502890  |
| C | -1.427303 | -3.917679 | 8.750505  |
| C | -2.679169 | -3.194939 | 8.750505  |
| C | -4.106445 | -0.722761 | 8.750504  |
| C | -4.106445 | 0.722752  | 8.750503  |
| C | -2.679169 | 3.194930  | 8.750504  |
| C | -1.427304 | 3.917669  | 8.750504  |
| C | 1.427303  | 3.917669  | 8.750504  |
| C | 2.679169  | 3.194930  | 8.750504  |
| C | 4.106445  | 0.722752  | 8.750503  |
| C | 4.106444  | -0.722761 | 8.750503  |
| C | 2.679169  | -3.194939 | 8.750505  |
| C | 1.427303  | -3.917679 | 8.750505  |
| C | -3.193891 | -2.676319 | 10.003116 |
| C | -3.914682 | -1.427827 | 10.003116 |
| C | -3.914682 | 1.427818  | 10.003116 |
| C | -3.193891 | 2.676310  | 10.003116 |
| C | -0.720808 | 4.104107  | 10.003116 |
| C | 0.720808  | 4.104107  | 10.003116 |
| C | 3.193890  | 2.676309  | 10.003116 |
| C | 3.914681  | 1.427818  | 10.003116 |
| C | 3.914681  | -1.427827 | 10.003116 |
| C | 3.193890  | -2.676319 | 10.003116 |
| C | 0.720808  | -4.104116 | 10.003117 |
| C | -0.720808 | -4.104116 | 10.003117 |
| C | -4.107647 | -0.723728 | 11.254255 |
| C | -4.107647 | 0.723719  | 11.254255 |
| C | -2.680609 | 3.195487  | 11.254253 |
| C | -1.427068 | 3.919194  | 11.254253 |
| C | 1.427067  | 3.919194  | 11.254253 |
| C | 2.680608  | 3.195487  | 11.254253 |
| C | 4.107646  | 0.723719  | 11.254254 |
| C | 4.107646  | -0.723728 | 11.254255 |
| C | 2.680608  | -3.195496 | 11.254254 |
| C | 1.427067  | -3.919203 | 11.254254 |
| C | -1.427068 | -3.919203 | 11.254254 |
| C | -2.680609 | -3.195496 | 11.254254 |
| C | -3.918445 | 1.427170  | 12.501562 |
| C | -3.195208 | 2.679897  | 12.501561 |
| C | -0.723254 | 4.107042  | 12.501560 |
| C | 0.723254  | 4.107042  | 12.501560 |
| C | 3.195207  | 2.679897  | 12.501561 |
| C | 3.918445  | 1.427170  | 12.501562 |
| C | 3.918445  | -1.427178 | 12.501562 |
| C | 3.195207  | -2.679905 | 12.501562 |
| C | 0.723254  | -4.107050 | 12.501561 |
| C | -0.723254 | -4.107050 | 12.501561 |
| C | -3.195208 | -2.679905 | 12.501562 |
| C | -3.918445 | -1.427178 | 12.501562 |
| C | -2.676138 | 3.193822  | 13.753578 |
| C | -1.427855 | 3.914492  | 13.753578 |
| C | 1.427855  | 3.914492  | 13.753578 |
| C | 2.676137  | 3.193821  | 13.753578 |
| C | 4.103968  | 0.720683  | 13.753579 |
| C | 4.103968  | -0.720691 | 13.753579 |
| C | 2.676137  | -3.193829 | 13.753579 |
| C | 1.427854  | -3.914500 | 13.753579 |
| C | -1.427855 | -3.914500 | 13.753579 |
| C | -2.676138 | -3.193829 | 13.753579 |
| C | -4.103968 | -0.720691 | 13.753579 |

|   |           |           |           |
|---|-----------|-----------|-----------|
| C | -4.103968 | 0.720683  | 13.753579 |
| C | -0.723322 | 4.107168  | 15.005531 |
| C | 0.723322  | 4.107168  | 15.005531 |
| C | 3.195282  | 2.680019  | 15.005530 |
| C | 3.918586  | 1.427174  | 15.005531 |
| C | 3.918586  | -1.427181 | 15.005531 |
| C | 3.195281  | -2.680026 | 15.005531 |
| C | 0.723322  | -4.107175 | 15.005532 |
| C | -0.723322 | -4.107175 | 15.005532 |
| C | -3.195282 | -2.680026 | 15.005532 |
| C | -3.918587 | -1.427181 | 15.005531 |
| C | -3.918587 | 1.427174  | 15.005531 |
| C | -3.195282 | 2.680019  | 15.005530 |
| C | 1.427051  | 3.919172  | 16.252737 |
| C | 2.680595  | 3.195464  | 16.252737 |
| C | 4.107617  | 0.723722  | 16.252737 |
| C | 4.107617  | -0.723729 | 16.252738 |
| C | 2.680595  | -3.195470 | 16.252739 |
| C | 1.427051  | -3.919179 | 16.252739 |
| C | -1.427052 | -3.919179 | 16.252739 |
| C | -2.680596 | -3.195470 | 16.252739 |
| C | -4.107618 | -0.723729 | 16.252738 |
| C | -4.107618 | 0.723722  | 16.252737 |
| C | -2.680596 | 3.195464  | 16.252737 |
| C | -1.427052 | 3.919172  | 16.252737 |
| C | 3.193823  | 2.676137  | 17.504005 |
| C | 3.914497  | 1.427849  | 17.504005 |
| C | 3.914497  | -1.427855 | 17.504006 |
| C | 3.193823  | -2.676144 | 17.504006 |
| C | 0.720690  | -4.103972 | 17.504006 |
| C | -0.720691 | -4.103972 | 17.504006 |
| C | -3.193823 | -2.676143 | 17.504006 |
| C | -3.914497 | -1.427855 | 17.504006 |
| C | -3.914497 | 1.427849  | 17.504005 |
| C | -3.193823 | 2.676138  | 17.504005 |
| C | -0.720691 | 4.103966  | 17.504004 |
| C | 0.720690  | 4.103966  | 17.504004 |
| C | 4.106594  | 0.722833  | 18.756709 |
| C | 4.106594  | -0.722839 | 18.756710 |
| C | 2.679313  | -3.195029 | 18.756709 |
| C | 1.427309  | -3.917849 | 18.756709 |
| C | -1.427310 | -3.917849 | 18.756709 |
| C | -2.679313 | -3.195029 | 18.756709 |
| C | -4.106594 | -0.722839 | 18.756710 |
| C | -4.106594 | 0.722833  | 18.756709 |
| C | -2.679313 | 3.195024  | 18.756707 |
| C | -1.427310 | 3.917844  | 18.756706 |
| C | 1.427310  | 3.917844  | 18.756706 |
| C | 2.679313  | 3.195024  | 18.756707 |
| C | 3.919826  | -1.426945 | 20.004036 |
| C | 3.195697  | -2.681218 | 20.004036 |
| C | 0.724146  | -4.108133 | 20.004035 |
| C | -0.724146 | -4.108133 | 20.004035 |
| C | -3.195698 | -2.681218 | 20.004036 |
| C | -3.919826 | -1.426945 | 20.004036 |
| C | -3.919826 | 1.426941  | 20.004035 |
| C | -3.195698 | 2.681214  | 20.004034 |
| C | -0.724146 | 4.108128  | 20.004033 |
| C | 0.724146  | 4.108128  | 20.004033 |
| C | 3.195697  | 2.681214  | 20.004034 |
| C | 3.919826  | 1.426941  | 20.004035 |
| C | 2.676329  | -3.193889 | 21.254428 |
| C | 1.427811  | -3.914697 | 21.254428 |
| C | -1.427811 | -3.914697 | 21.254428 |
| C | -2.676330 | -3.193889 | 21.254428 |
| C | -4.104114 | -0.720826 | 21.254428 |
| C | -4.104114 | 0.720822  | 21.254427 |
| C | -2.676330 | 3.193885  | 21.254426 |
| C | -1.427811 | 3.914694  | 21.254426 |
| C | 1.427811  | 3.914694  | 21.254426 |

|   |           |           |           |
|---|-----------|-----------|-----------|
| C | 2.676329  | 3.193885  | 21.254426 |
| C | 4.104114  | 0.720822  | 21.254427 |
| C | 4.104114  | -0.720826 | 21.254427 |
| C | 0.722283  | -4.105941 | 22.507780 |
| C | -0.722283 | -4.105941 | 22.507780 |
| C | -3.194730 | -2.678507 | 22.507780 |
| C | -3.916995 | -1.427460 | 22.507780 |
| C | -3.916995 | 1.427457  | 22.507779 |
| C | -3.194730 | 2.678504  | 22.507778 |
| C | -0.722283 | 4.105938  | 22.507778 |
| C | 0.722283  | 4.105938  | 22.507778 |
| C | 3.194730  | 2.678504  | 22.507778 |
| C | 3.916995  | 1.427457  | 22.507778 |
| C | 3.916995  | -1.427460 | 22.507779 |
| C | 3.194730  | -2.678507 | 22.507779 |
| C | -1.426853 | -3.920375 | 23.755456 |
| C | -2.681730 | -3.195894 | 23.755456 |
| C | -4.108549 | -0.724497 | 23.755456 |
| C | -4.108549 | 0.724495  | 23.755455 |
| C | -2.681730 | 3.195892  | 23.755454 |
| C | -1.426853 | 3.920373  | 23.755453 |
| C | 1.426853  | 3.920372  | 23.755453 |
| C | 2.681730  | 3.195892  | 23.755454 |
| C | 4.108549  | 0.724495  | 23.755455 |
| C | 4.108549  | -0.724497 | 23.755456 |
| C | 2.681730  | -3.195894 | 23.755456 |
| C | 1.426853  | -3.920375 | 23.755456 |
| C | -3.194011 | -2.676713 | 25.004874 |
| C | -3.915082 | -1.427732 | 25.004874 |
| C | -3.915082 | 1.427731  | 25.004873 |
| C | -3.194011 | 2.676712  | 25.004872 |
| C | -0.721090 | 4.104422  | 25.004869 |
| C | 0.721090  | 4.104422  | 25.004869 |
| C | 3.194011  | 2.676712  | 25.004872 |
| C | 3.915082  | 1.427731  | 25.004872 |
| C | 3.915082  | -1.427732 | 25.004873 |
| C | 3.194010  | -2.676713 | 25.004873 |
| C | 0.721090  | -4.104423 | 25.004872 |
| C | -0.721090 | -4.104423 | 25.004872 |
| C | -4.105204 | -0.721675 | 26.258742 |
| C | -4.105204 | 0.721675  | 26.258741 |
| C | -2.677613 | 3.194410  | 26.258738 |
| C | -1.427621 | 3.916071  | 26.258738 |
| C | 1.427621  | 3.916071  | 26.258738 |
| C | 2.677613  | 3.194409  | 26.258738 |
| C | 4.105204  | 0.721675  | 26.258741 |
| C | 4.105204  | -0.721676 | 26.258742 |
| C | 2.677613  | -3.194410 | 26.258740 |
| C | 1.427621  | -3.916071 | 26.258740 |
| C | -1.427621 | -3.916071 | 26.258740 |
| C | -2.677613 | -3.194410 | 26.258741 |
| C | -3.920775 | 1.426786  | 27.507006 |
| C | -3.196035 | 2.682124  | 27.507005 |
| C | -0.724760 | 4.108884  | 27.507003 |
| C | 0.724760  | 4.108884  | 27.507003 |
| C | 3.196035  | 2.682124  | 27.507005 |
| C | 3.920775  | 1.426786  | 27.507006 |
| C | 3.920775  | -1.426786 | 27.507007 |
| C | 3.196035  | -2.682123 | 27.507007 |
| C | 0.724760  | -4.108883 | 27.507006 |
| C | -0.724760 | -4.108883 | 27.507006 |
| C | -3.196035 | -2.682123 | 27.507007 |
| C | -3.920775 | -1.426786 | 27.507007 |
| C | -2.677288 | 3.194211  | 28.755360 |
| C | -1.427608 | 3.915693  | 28.755359 |
| C | 1.427608  | 3.915693  | 28.755359 |
| C | 2.677289  | 3.194211  | 28.755360 |
| C | 4.104865  | 0.721496  | 28.755360 |
| C | 4.104865  | -0.721495 | 28.755361 |
| C | 2.677289  | -3.194209 | 28.755362 |

|   |           |           |           |
|---|-----------|-----------|-----------|
| C | 1.427608  | -3.915692 | 28.755362 |
| C | -1.427608 | -3.915692 | 28.755362 |
| C | -2.677288 | -3.194209 | 28.755362 |
| C | -4.104865 | -0.721495 | 28.755361 |
| C | -4.104865 | 0.721496  | 28.755360 |
| C | -0.721008 | 4.104413  | 30.009584 |
| C | 0.721009  | 4.104413  | 30.009584 |
| C | 3.194035  | 2.676637  | 30.009584 |
| C | 3.915023  | 1.427795  | 30.009584 |
| C | 3.915023  | -1.427793 | 30.009585 |
| C | 3.194035  | -2.676634 | 30.009586 |
| C | 0.721009  | -4.104411 | 30.009587 |
| C | -0.721008 | -4.104411 | 30.009587 |
| C | -3.194035 | -2.676634 | 30.009586 |
| C | -3.915023 | -1.427793 | 30.009585 |
| C | -3.915023 | 1.427795  | 30.009584 |
| C | -3.194035 | 2.676637  | 30.009584 |
| C | 1.426728  | 3.921034  | 31.258715 |
| C | 2.682354  | 3.196116  | 31.258715 |
| C | 4.109043  | 0.724931  | 31.258716 |
| C | 4.109043  | -0.724928 | 31.258717 |
| C | 2.682354  | -3.196113 | 31.258717 |
| C | 1.426728  | -3.921030 | 31.258718 |
| C | -1.426728 | -3.921030 | 31.258718 |
| C | -2.682354 | -3.196113 | 31.258718 |
| C | -4.109042 | -0.724928 | 31.258717 |
| C | -4.109042 | 0.724932  | 31.258717 |
| C | -2.682354 | 3.196116  | 31.258715 |
| C | -1.426728 | 3.921034  | 31.258715 |
| C | 3.194436  | 2.678095  | 32.505905 |
| C | 3.916481  | 1.427419  | 32.505905 |
| C | 3.916481  | -1.427414 | 32.505906 |
| C | 3.194436  | -2.678090 | 32.505907 |
| C | 0.722068  | -4.105489 | 32.505907 |
| C | -0.722067 | -4.105489 | 32.505907 |
| C | -3.194436 | -2.678090 | 32.505907 |
| C | -3.916481 | -1.427414 | 32.505906 |
| C | -3.916481 | 1.427419  | 32.505905 |
| C | -3.194436 | 2.678095  | 32.505905 |
| C | -0.722067 | 4.105494  | 32.505903 |
| C | 0.722068  | 4.105494  | 32.505903 |
| C | 4.103475  | 0.720245  | 33.760298 |
| C | 4.103475  | -0.720240 | 33.760299 |
| C | 2.675509  | -3.193638 | 33.760300 |
| C | 1.428000  | -3.913870 | 33.760301 |
| C | -1.427999 | -3.913870 | 33.760301 |
| C | -2.675508 | -3.193638 | 33.760300 |
| C | -4.103474 | -0.720239 | 33.760299 |
| C | -4.103474 | 0.720245  | 33.760298 |
| C | -2.675508 | 3.193644  | 33.760297 |
| C | -1.427999 | 3.913876  | 33.760298 |
| C | 1.428000  | 3.913876  | 33.760298 |
| C | 2.675509  | 3.193644  | 33.760297 |
| C | 3.921357  | -1.426778 | 35.010711 |
| C | 3.196321  | -2.682636 | 35.010713 |
| C | 0.725060  | -4.109397 | 35.010717 |
| C | -0.725060 | -4.109397 | 35.010717 |
| C | -3.196321 | -2.682636 | 35.010713 |
| C | -3.921356 | -1.426778 | 35.010711 |
| C | -3.921356 | 1.426785  | 35.010710 |
| C | -3.196321 | 2.682643  | 35.010711 |
| C | -0.725060 | 4.109404  | 35.010713 |
| C | 0.725060  | 4.109404  | 35.010713 |
| C | 3.196321  | 2.682643  | 35.010711 |
| C | 3.921357  | 1.426785  | 35.010709 |
| C | 2.679684  | -3.195336 | 36.256472 |
| C | 1.427386  | -3.918333 | 36.256476 |
| C | -1.427385 | -3.918333 | 36.256476 |
| C | -2.679683 | -3.195336 | 36.256472 |
| C | -4.107029 | -0.723004 | 36.256466 |

|   |           |           |           |
|---|-----------|-----------|-----------|
| C | -4.107029 | 0.723012  | 36.256466 |
| C | -2.679683 | 3.195344  | 36.256470 |
| C | -1.427385 | 3.918341  | 36.256473 |
| C | 1.427386  | 3.918341  | 36.256472 |
| C | 2.679684  | 3.195344  | 36.256470 |
| C | 4.107030  | 0.723012  | 36.256465 |
| C | 4.107030  | -0.723004 | 36.256466 |
| C | 0.719176  | -4.102898 | 37.510663 |
| C | -0.719176 | -4.102898 | 37.510663 |
| C | -3.193636 | -2.674287 | 37.510656 |
| C | -3.912789 | -1.428618 | 37.510652 |
| C | -3.912789 | 1.428627  | 37.510650 |
| C | -3.193636 | 2.674297  | 37.510653 |
| C | -0.719175 | 4.102908  | 37.510660 |
| C | 0.719176  | 4.102908  | 37.510660 |
| C | 3.193637  | 2.674296  | 37.510653 |
| C | 3.912790  | 1.428627  | 37.510650 |
| C | 3.912790  | -1.428618 | 37.510651 |
| C | 3.193637  | -2.674287 | 37.510655 |
| C | -1.426394 | -3.920380 | 38.763217 |
| C | -2.681955 | -3.195497 | 38.763210 |
| C | -4.108312 | -0.724888 | 38.763203 |
| C | -4.108312 | 0.724898  | 38.763203 |
| C | -2.681955 | 3.195507  | 38.763207 |
| C | -1.426394 | 3.920390  | 38.763214 |
| C | 1.426395  | 3.920390  | 38.763214 |
| C | 2.681956  | 3.195507  | 38.763207 |
| C | 4.108313  | 0.724898  | 38.763203 |
| C | 4.108313  | -0.724888 | 38.763203 |
| C | 2.681956  | -3.195497 | 38.763210 |
| C | 1.426395  | -3.920380 | 38.763217 |
| C | -3.191351 | -2.678211 | 40.006764 |
| C | -3.915051 | -1.424682 | 40.006757 |
| C | -3.915051 | 1.424693  | 40.006756 |
| C | -3.191351 | 2.678222  | 40.006761 |
| C | -0.723717 | 4.102893  | 40.006773 |
| C | 0.723718  | 4.102893  | 40.006773 |
| C | 3.191352  | 2.678222  | 40.006761 |
| C | 3.915052  | 1.424693  | 40.006756 |
| C | 3.915052  | -1.424682 | 40.006757 |
| C | 3.191352  | -2.678211 | 40.006763 |
| C | 0.723718  | -4.102881 | 40.006776 |
| C | -0.723717 | -4.102881 | 40.006776 |
| C | -4.087003 | -0.715163 | 41.260537 |
| C | -4.087003 | 0.715176  | 41.260536 |
| C | -2.662868 | 3.181895  | 41.260547 |
| C | -1.424142 | 3.897061  | 41.260563 |
| C | 1.424143  | 3.897061  | 41.260563 |
| C | 2.662869  | 3.181894  | 41.260547 |
| C | 4.087004  | 0.715176  | 41.260536 |
| C | 4.087004  | -0.715164 | 41.260536 |
| C | 2.662869  | -3.181882 | 41.260550 |
| C | 1.424143  | -3.897049 | 41.260567 |
| C | -1.424142 | -3.897049 | 41.260567 |
| C | -2.662868 | -3.181882 | 41.260550 |
| C | -3.911908 | 1.420198  | 42.521730 |
| C | -3.185901 | 2.677721  | 42.521732 |
| C | -0.726023 | 4.097884  | 42.521773 |
| C | 0.726024  | 4.097884  | 42.521773 |
| C | 3.185902  | 2.677721  | 42.521732 |
| C | 3.911909  | 1.420198  | 42.521730 |
| C | 3.911909  | -1.420185 | 42.521731 |
| C | 3.185902  | -2.677708 | 42.521734 |
| C | 0.726024  | -4.097871 | 42.521777 |
| C | -0.726023 | -4.097871 | 42.521777 |
| C | -3.185901 | -2.677708 | 42.521734 |
| C | -3.911908 | -1.420184 | 42.521731 |
| C | -2.710011 | 3.224250  | 43.761975 |
| C | -1.437298 | 3.958958  | 43.762007 |
| C | 1.437299  | 3.958958  | 43.762007 |

|   |           |           |            |
|---|-----------|-----------|------------|
| C | 2.710012  | 3.224250  | 43.761975  |
| C | 4.147269  | 0.734782  | 43.761965  |
| C | 4.147269  | -0.734767 | 43.761965  |
| C | 2.710012  | -3.224236 | 43.761978  |
| C | 1.437299  | -3.958944 | 43.762011  |
| C | -1.437298 | -3.958944 | 43.762011  |
| C | -2.710011 | -3.224235 | 43.761978  |
| C | -4.147268 | -0.734767 | 43.761966  |
| C | -4.147268 | 0.734782  | 43.761965  |
| C | -0.691910 | 4.212188  | 44.977617  |
| C | 0.691911  | 4.212188  | 44.977617  |
| C | 3.302201  | 2.705444  | 44.977546  |
| C | 3.994103  | 1.507014  | 44.977543  |
| C | 3.994103  | -1.506999 | 44.977544  |
| C | 3.302201  | -2.705428 | 44.977548  |
| C | 0.691911  | -4.212172 | 44.977621  |
| C | -0.691910 | -4.212172 | 44.977621  |
| C | -3.302199 | -2.705428 | 44.977548  |
| C | -3.994101 | -1.506999 | 44.977545  |
| C | -3.994101 | 1.507015  | 44.977543  |
| C | -3.302199 | 2.705444  | 44.977546  |
| H | -1.227063 | 4.276024  | -45.933830 |
| H | 1.227064  | 4.276024  | -45.933830 |
| H | 3.090058  | 3.200903  | -45.933749 |
| H | 4.317134  | 1.075570  | -45.933741 |
| H | 4.317134  | -1.075556 | -45.933741 |
| H | 3.090058  | -3.200889 | -45.933751 |
| H | 1.227064  | -4.276010 | -45.933833 |
| H | -1.227063 | -4.276010 | -45.933833 |
| H | -3.090057 | -3.200889 | -45.933751 |
| H | -4.317133 | -1.075556 | -45.933742 |
| H | -4.317133 | 1.075569  | -45.933741 |
| H | -3.090057 | 3.200903  | -45.933749 |
| H | -1.227063 | 4.276026  | 45.933830  |
| H | 1.227064  | 4.276026  | 45.933830  |
| H | 3.090058  | 3.200905  | 45.933749  |
| H | 4.317134  | 1.075571  | 45.933741  |
| H | 4.317134  | -1.075554 | 45.933742  |
| H | 3.090058  | -3.200888 | 45.933752  |
| H | 1.227064  | -4.276009 | 45.933833  |
| H | -1.227063 | -4.276009 | 45.933833  |
| H | -3.090057 | -3.200888 | 45.933752  |
| H | -4.317133 | -1.075554 | 45.933742  |
| H | -4.317133 | 1.075571  | 45.933741  |
| H | -3.090057 | 3.200905  | 45.933749  |

Nanotube (6,6) u37v0s  
B3LYP/STO-3G Energy: -33445.399350

|   |           |           |            |
|---|-----------|-----------|------------|
| C | -3.466921 | 2.489010  | -45.611518 |
| C | -2.489010 | 3.466921  | -45.611518 |
| C | 0.422026  | 4.246768  | -45.611552 |
| C | 1.757890  | 3.888863  | -45.611550 |
| C | 3.888863  | 1.757890  | -45.611550 |
| C | 4.246768  | 0.422026  | -45.611552 |
| C | 3.466921  | -2.489010 | -45.611518 |
| C | 2.489009  | -3.466921 | -45.611518 |
| C | -0.422026 | -4.246768 | -45.611552 |
| C | -1.757891 | -3.888863 | -45.611550 |
| C | -3.888863 | -1.757890 | -45.611550 |
| C | -4.246768 | -0.422026 | -45.611552 |
| C | -1.782067 | 3.814670  | -44.395095 |
| C | -0.364045 | 4.194575  | -44.395118 |
| C | 2.412579  | 3.450630  | -44.395117 |
| C | 3.450630  | 2.412579  | -44.395117 |
| C | 4.194575  | -0.364045 | -44.395118 |
| C | 3.814670  | -1.782067 | -44.395095 |
| C | 1.782067  | -3.814671 | -44.395095 |



|   |           |           |            |
|---|-----------|-----------|------------|
| C | 0.364045  | -4.194575 | -44.395118 |
| C | -2.412579 | -3.450631 | -44.395117 |
| C | -3.450631 | -2.412579 | -44.395117 |
| C | -4.194575 | 0.364045  | -44.395118 |
| C | -3.814671 | 1.782067  | -44.395095 |
| C | 0.359157  | 4.146109  | -43.154701 |
| C | 1.762004  | 3.770224  | -43.154698 |
| C | 3.770224  | 1.762004  | -43.154698 |
| C | 4.146109  | 0.359156  | -43.154701 |
| C | 3.411086  | -2.384136 | -43.154677 |
| C | 2.384136  | -3.411086 | -43.154677 |
| C | -0.359157 | -4.146109 | -43.154701 |
| C | -1.762005 | -3.770224 | -43.154698 |
| C | -3.770224 | -1.762004 | -43.154698 |
| C | -4.146109 | -0.359157 | -43.154701 |
| C | -3.411086 | 2.384136  | -43.154677 |
| C | -2.384136 | 3.411086  | -43.154677 |
| C | 2.384088  | 3.395114  | -41.894042 |
| C | 3.395115  | 2.384088  | -41.894042 |
| C | 4.132276  | -0.367112 | -41.894037 |
| C | 3.762221  | -1.748207 | -41.894028 |
| C | 1.748206  | -3.762222 | -41.894028 |
| C | 0.367111  | -4.132276 | -41.894037 |
| C | -2.384088 | -3.395115 | -41.894042 |
| C | -3.395115 | -2.384088 | -41.894042 |
| C | -4.132276 | 0.367111  | -41.894037 |
| C | -3.762221 | 1.748207  | -41.894028 |
| C | -1.748207 | 3.762221  | -41.894028 |
| C | -0.367111 | 4.132276  | -41.894037 |
| C | 3.774807  | 1.759882  | -40.639351 |
| C | 4.149003  | 0.363300  | -40.639348 |
| C | 3.411522  | -2.389158 | -40.639341 |
| C | 2.389158  | -3.411522 | -40.639341 |
| C | -0.363300 | -4.149003 | -40.639348 |
| C | -1.759883 | -3.774807 | -40.639351 |
| C | -3.774807 | -1.759883 | -40.639351 |
| C | -4.149003 | -0.363300 | -40.639348 |
| C | -3.411522 | 2.389158  | -40.639341 |
| C | -2.389158 | 3.411522  | -40.639341 |
| C | 0.363300  | 4.149003  | -40.639348 |
| C | 1.759883  | 3.774807  | -40.639351 |
| C | 4.155897  | -0.362974 | -39.395327 |
| C | 3.780618  | -1.763608 | -39.395324 |
| C | 1.763608  | -3.780618 | -39.395324 |
| C | 0.362973  | -4.155898 | -39.395327 |
| C | -2.392338 | -3.417668 | -39.395331 |
| C | -3.417668 | -2.392338 | -39.395331 |
| C | -4.155898 | 0.362973  | -39.395327 |
| C | -3.780618 | 1.763608  | -39.395324 |
| C | -1.763608 | 3.780618  | -39.395324 |
| C | -0.362973 | 4.155897  | -39.395327 |
| C | 2.392338  | 3.417667  | -39.395331 |
| C | 3.417667  | 2.392338  | -39.395331 |
| C | 3.409475  | -2.392496 | -38.143563 |
| C | 2.392496  | -3.409475 | -38.143563 |
| C | -0.367215 | -4.148898 | -38.143567 |
| C | -1.756446 | -3.776681 | -38.143569 |
| C | -3.776681 | -1.756446 | -38.143569 |
| C | -4.148898 | -0.367215 | -38.143567 |
| C | -3.409475 | 2.392496  | -38.143563 |
| C | -2.392496 | 3.409475  | -38.143563 |
| C | 0.367215  | 4.148898  | -38.143567 |
| C | 1.756446  | 3.776681  | -38.143569 |
| C | 3.776681  | 1.756446  | -38.143569 |
| C | 4.148898  | 0.367214  | -38.143567 |
| C | 1.760072  | -3.778884 | -36.888602 |
| C | 0.365165  | -4.152628 | -36.888604 |
| C | -2.392605 | -3.413742 | -36.888606 |
| C | -3.413742 | -2.392605 | -36.888606 |
| C | -4.152628 | 0.365165  | -36.888604 |

|   |           |           |            |
|---|-----------|-----------|------------|
| C | -3.778884 | 1.760073  | -36.888602 |
| C | -1.760073 | 3.778884  | -36.888602 |
| C | -0.365165 | 4.152628  | -36.888604 |
| C | 2.392605  | 3.413742  | -36.888606 |
| C | 3.413742  | 2.392605  | -36.888606 |
| C | 4.152628  | -0.365165 | -36.888604 |
| C | 3.778884  | -1.760073 | -36.888602 |
| C | -0.363163 | -4.156810 | -35.642005 |
| C | -1.763916 | -3.781507 | -35.642006 |
| C | -3.781507 | -1.763916 | -35.642006 |
| C | -4.156810 | -0.363162 | -35.642005 |
| C | -3.418359 | 2.392944  | -35.642003 |
| C | -2.392944 | 3.418359  | -35.642003 |
| C | 0.363162  | 4.156810  | -35.642005 |
| C | 1.763916  | 3.781507  | -35.642006 |
| C | 3.781507  | 1.763916  | -35.642006 |
| C | 4.156810  | 0.363162  | -35.642005 |
| C | 3.418359  | -2.392944 | -35.642003 |
| C | 2.392943  | -3.418359 | -35.642003 |
| C | -2.392215 | -3.411053 | -34.392557 |
| C | -3.411053 | -2.392214 | -34.392557 |
| C | -4.150107 | 0.366171  | -34.392556 |
| C | -3.777203 | 1.757940  | -34.392556 |
| C | -1.757940 | 3.777203  | -34.392556 |
| C | -0.366171 | 4.150107  | -34.392556 |
| C | 2.392214  | 3.411053  | -34.392557 |
| C | 3.411053  | 2.392214  | -34.392557 |
| C | 4.150107  | -0.366171 | -34.392556 |
| C | 3.777203  | -1.757940 | -34.392556 |
| C | 1.757940  | -3.777203 | -34.392556 |
| C | 0.366171  | -4.150107 | -34.392556 |
| C | -3.777544 | -1.758673 | -33.137654 |
| C | -4.150759 | -0.365718 | -33.137654 |
| C | -3.411837 | 2.392131  | -33.137654 |
| C | -2.392131 | 3.411837  | -33.137654 |
| C | 0.365718  | 4.150759  | -33.137654 |
| C | 1.758673  | 3.777544  | -33.137654 |
| C | 3.777544  | 1.758673  | -33.137654 |
| C | 4.150759  | 0.365718  | -33.137654 |
| C | 3.411837  | -2.392131 | -33.137654 |
| C | 2.392131  | -3.411837 | -33.137654 |
| C | -0.365718 | -4.150759 | -33.137654 |
| C | -1.758673 | -3.777544 | -33.137654 |
| C | -4.156118 | 0.363322  | -31.889207 |
| C | -3.780985 | 1.763417  | -31.889207 |
| C | -1.763417 | 3.780985  | -31.889207 |
| C | -0.363322 | 4.156118  | -31.889207 |
| C | 2.392752  | 3.417687  | -31.889207 |
| C | 3.417687  | 2.392752  | -31.889207 |
| C | 4.156118  | -0.363322 | -31.889207 |
| C | 3.780985  | -1.763418 | -31.889207 |
| C | 1.763417  | -3.780985 | -31.889207 |
| C | 0.363322  | -4.156118 | -31.889207 |
| C | -2.392753 | -3.417687 | -31.889207 |
| C | -3.417687 | -2.392752 | -31.889207 |
| C | -3.412583 | 2.392322  | -30.641043 |
| C | -2.392322 | 3.412583  | -30.641043 |
| C | 0.365509  | 4.151499  | -30.641044 |
| C | 1.759222  | 3.778080  | -30.641044 |
| C | 3.778080  | 1.759222  | -30.641044 |
| C | 4.151499  | 0.365509  | -30.641044 |
| C | 3.412583  | -2.392322 | -30.641043 |
| C | 2.392322  | -3.412583 | -30.641043 |
| C | -0.365509 | -4.151499 | -30.641044 |
| C | -1.759223 | -3.778080 | -30.641044 |
| C | -3.778080 | -1.759222 | -30.641044 |
| C | -4.151499 | -0.365509 | -30.641044 |
| C | -1.757986 | 3.777098  | -29.386701 |
| C | -0.366081 | 4.150037  | -29.386701 |
| C | 2.392098  | 3.411036  | -29.386701 |

|   |           |           |            |
|---|-----------|-----------|------------|
| C | 3.411036  | 2.392098  | -29.386701 |
| C | 4.150037  | -0.366081 | -29.386701 |
| C | 3.777098  | -1.757986 | -29.386701 |
| C | 1.757986  | -3.777098 | -29.386701 |
| C | 0.366081  | -4.150037 | -29.386701 |
| C | -2.392098 | -3.411036 | -29.386701 |
| C | -3.411036 | -2.392098 | -29.386701 |
| C | -4.150037 | 0.366081  | -29.386701 |
| C | -3.777098 | 1.757986  | -29.386701 |
| C | 0.363620  | 4.155457  | -28.136712 |
| C | 1.762838  | 3.780563  | -28.136712 |
| C | 3.780563  | 1.762838  | -28.136712 |
| C | 4.155457  | 0.363620  | -28.136712 |
| C | 3.416960  | -2.392668 | -28.136712 |
| C | 2.392668  | -3.416960 | -28.136712 |
| C | -0.363620 | -4.155457 | -28.136712 |
| C | -1.762838 | -3.780563 | -28.136712 |
| C | -3.780563 | -1.762838 | -28.136712 |
| C | -4.155457 | -0.363620 | -28.136712 |
| C | -3.416960 | 2.392668  | -28.136712 |
| C | -2.392668 | 3.416960  | -28.136712 |
| C | 2.392433  | 3.413913  | -26.889239 |
| C | 3.413913  | 2.392433  | -26.889239 |
| C | 4.152696  | -0.364934 | -26.889239 |
| C | 3.778827  | -1.760312 | -26.889240 |
| C | 1.760312  | -3.778827 | -26.889240 |
| C | 0.364934  | -4.152696 | -26.889239 |
| C | -2.392433 | -3.413913 | -26.889238 |
| C | -3.413913 | -2.392433 | -26.889238 |
| C | -4.152696 | 0.364934  | -26.889239 |
| C | -3.778827 | 1.760312  | -26.889240 |
| C | -1.760312 | 3.778827  | -26.889240 |
| C | -0.364934 | 4.152696  | -26.889239 |
| C | 3.776865  | 1.757652  | -25.635735 |
| C | 4.149664  | 0.366258  | -25.635735 |
| C | 3.410620  | -2.392057 | -25.635736 |
| C | 2.392057  | -3.410620 | -25.635736 |
| C | -0.366258 | -4.149664 | -25.635735 |
| C | -1.757652 | -3.776865 | -25.635735 |
| C | -3.776865 | -1.757652 | -25.635735 |
| C | -4.149664 | -0.366258 | -25.635735 |
| C | -3.410620 | 2.392057  | -25.635736 |
| C | -2.392057 | 3.410620  | -25.635736 |
| C | 0.366258  | 4.149664  | -25.635735 |
| C | 1.757652  | 3.776865  | -25.635735 |
| C | 4.154585  | -0.363994 | -24.384425 |
| C | 3.779994  | -1.762073 | -24.384425 |
| C | 1.762073  | -3.779994 | -24.384425 |
| C | 0.363994  | -4.154585 | -24.384425 |
| C | -2.392562 | -3.416020 | -24.384425 |
| C | -3.416020 | -2.392562 | -24.384425 |
| C | -4.154585 | 0.363994  | -24.384425 |
| C | -3.779994 | 1.762073  | -24.384425 |
| C | -1.762073 | 3.779994  | -24.384425 |
| C | -0.363994 | 4.154585  | -24.384425 |
| C | 2.392562  | 3.416020  | -24.384425 |
| C | 3.416020  | 2.392562  | -24.384425 |
| C | 3.415013  | -2.392514 | -23.137189 |
| C | 2.392514  | -3.415013 | -23.137189 |
| C | -0.364458 | -4.153693 | -23.137189 |
| C | -1.761227 | -3.779454 | -23.137189 |
| C | -3.779454 | -1.761227 | -23.137189 |
| C | -4.153693 | -0.364458 | -23.137189 |
| C | -3.415013 | 2.392514  | -23.137189 |
| C | -2.392514 | 3.415013  | -23.137189 |
| C | 0.364458  | 4.153693  | -23.137189 |
| C | 1.761227  | 3.779454  | -23.137189 |
| C | 3.779454  | 1.761227  | -23.137189 |
| C | 4.153693  | 0.364458  | -23.137189 |
| C | 1.757631  | -3.776854 | -21.884723 |

|   |           |           |            |
|---|-----------|-----------|------------|
| C | 0.366269  | -4.149646 | -21.884723 |
| C | -2.392061 | -3.410601 | -21.884723 |
| C | -3.410601 | -2.392061 | -21.884723 |
| C | -4.149646 | 0.366269  | -21.884723 |
| C | -3.776854 | 1.757631  | -21.884723 |
| C | -1.757631 | 3.776854  | -21.884723 |
| C | -0.366269 | 4.149646  | -21.884723 |
| C | 2.392061  | 3.410601  | -21.884723 |
| C | 3.410601  | 2.392061  | -21.884723 |
| C | 4.149646  | -0.366269 | -21.884723 |
| C | 3.776854  | -1.757631 | -21.884723 |
| C | -0.364431 | -4.153616 | -20.632352 |
| C | -1.761212 | -3.779374 | -20.632351 |
| C | -3.779374 | -1.761212 | -20.632351 |
| C | -4.153616 | -0.364431 | -20.632352 |
| C | -3.414960 | 2.392453  | -20.632352 |
| C | -2.392453 | 3.414960  | -20.632352 |
| C | 0.364431  | 4.153616  | -20.632352 |
| C | 1.761212  | 3.779374  | -20.632351 |
| C | 3.779374  | 1.761212  | -20.632351 |
| C | 4.153616  | 0.364431  | -20.632352 |
| C | 3.414960  | -2.392453 | -20.632352 |
| C | 2.392453  | -3.414960 | -20.632352 |
| C | -2.392587 | -3.415868 | -19.384958 |
| C | -3.415868 | -2.392587 | -19.384958 |
| C | -4.154467 | 0.364092  | -19.384958 |
| C | -3.779941 | 1.761929  | -19.384958 |
| C | -1.761930 | 3.779941  | -19.384958 |
| C | -0.364092 | 4.154467  | -19.384958 |
| C | 2.392587  | 3.415868  | -19.384958 |
| C | 3.415868  | 2.392587  | -19.384958 |
| C | 4.154467  | -0.364092 | -19.384958 |
| C | 3.779941  | -1.761929 | -19.384958 |
| C | 1.761930  | -3.779941 | -19.384958 |
| C | 0.364092  | -4.154467 | -19.384958 |
| C | -3.777057 | -1.757902 | -18.133633 |
| C | -4.149957 | -0.366137 | -18.133633 |
| C | -3.410935 | 2.392100  | -18.133633 |
| C | -2.392100 | 3.410935  | -18.133633 |
| C | 0.366137  | 4.149957  | -18.133633 |
| C | 1.757902  | 3.777057  | -18.133633 |
| C | 3.777057  | 1.757902  | -18.133633 |
| C | 4.149957  | 0.366137  | -18.133633 |
| C | 3.410935  | -2.392100 | -18.133633 |
| C | 2.392100  | -3.410935 | -18.133633 |
| C | -0.366137 | -4.149957 | -18.133633 |
| C | -1.757902 | -3.777057 | -18.133633 |
| C | -4.152633 | 0.364887  | -16.880516 |
| C | -3.778750 | 1.760323  | -16.880516 |
| C | -1.760323 | 3.778750  | -16.880516 |
| C | -0.364887 | 4.152633  | -16.880516 |
| C | 2.392357  | 3.413880  | -16.880516 |
| C | 3.413880  | 2.392357  | -16.880516 |
| C | 4.152633  | -0.364887 | -16.880516 |
| C | 3.778750  | -1.760323 | -16.880516 |
| C | 1.760323  | -3.778750 | -16.880516 |
| C | 0.364887  | -4.152633 | -16.880516 |
| C | -2.392357 | -3.413880 | -16.880516 |
| C | -3.413880 | -2.392357 | -16.880516 |
| C | -3.416422 | 2.392640  | -15.632622 |
| C | -2.392640 | 3.416422  | -15.632622 |
| C | 0.363861  | 4.154974  | -15.632622 |
| C | 1.762384  | 3.780265  | -15.632622 |
| C | 3.780265  | 1.762384  | -15.632622 |
| C | 4.154974  | 0.363861  | -15.632622 |
| C | 3.416423  | -2.392640 | -15.632622 |
| C | 2.392640  | -3.416422 | -15.632622 |
| C | -0.363861 | -4.154974 | -15.632622 |
| C | -1.762384 | -3.780265 | -15.632622 |
| C | -3.780265 | -1.762384 | -15.632622 |

|   |           |           |            |
|---|-----------|-----------|------------|
| C | -4.154974 | -0.363861 | -15.632622 |
| C | -1.758418 | 3.777441  | -14.382439 |
| C | -0.365882 | 4.150547  | -14.382439 |
| C | 2.392175  | 3.411575  | -14.382439 |
| C | 3.411575  | 2.392175  | -14.382439 |
| C | 4.150547  | -0.365882 | -14.382439 |
| C | 3.777441  | -1.758418 | -14.382439 |
| C | 1.758418  | -3.777441 | -14.382439 |
| C | 0.365882  | -4.150547 | -14.382439 |
| C | -2.392175 | -3.411575 | -14.382439 |
| C | -3.411575 | -2.392175 | -14.382439 |
| C | -4.150547 | 0.365882  | -14.382439 |
| C | -3.777441 | 1.758418  | -14.382439 |
| C | 0.365322  | 4.151724  | -13.128930 |
| C | 1.759492  | 3.778180  | -13.128930 |
| C | 3.778180  | 1.759492  | -13.128930 |
| C | 4.151724  | 0.365322  | -13.128930 |
| C | 3.412874  | -2.392279 | -13.128931 |
| C | 2.392279  | -3.412874 | -13.128931 |
| C | -0.365322 | -4.151723 | -13.128930 |
| C | -1.759492 | -3.778180 | -13.128930 |
| C | -3.778180 | -1.759492 | -13.128930 |
| C | -4.151723 | -0.365322 | -13.128930 |
| C | -3.412874 | 2.392279  | -13.128931 |
| C | -2.392279 | 3.412874  | -13.128931 |
| C | 2.392672  | 3.416647  | -11.880264 |
| C | 3.416647  | 2.392672  | -11.880264 |
| C | 4.155185  | -0.363777 | -11.880264 |
| C | 3.780405  | -1.762562 | -11.880264 |
| C | 1.762563  | -3.780404 | -11.880264 |
| C | 0.363777  | -4.155184 | -11.880264 |
| C | -2.392672 | -3.416647 | -11.880264 |
| C | -3.416647 | -2.392672 | -11.880264 |
| C | -4.155185 | 0.363777  | -11.880264 |
| C | -3.780404 | 1.762562  | -11.880264 |
| C | -1.762563 | 3.780404  | -11.880264 |
| C | -0.363777 | 4.155185  | -11.880264 |
| C | 3.777962  | 1.759119  | -10.631117 |
| C | 4.151349  | 0.365536  | -10.631116 |
| C | 3.412443  | -2.392276 | -10.631116 |
| C | 2.392276  | -3.412443 | -10.631116 |
| C | -0.365535 | -4.151349 | -10.631116 |
| C | -1.759119 | -3.777962 | -10.631116 |
| C | -3.777962 | -1.759119 | -10.631116 |
| C | -4.151349 | -0.365536 | -10.631116 |
| C | -3.412443 | 2.392276  | -10.631116 |
| C | -2.392276 | 3.412443  | -10.631116 |
| C | 0.365536  | 4.151349  | -10.631116 |
| C | 1.759119  | 3.777962  | -10.631117 |
| C | 4.150968  | -0.365694 | -9.377588  |
| C | 3.777712  | -1.758791 | -9.377588  |
| C | 1.758792  | -3.777712 | -9.377588  |
| C | 0.365694  | -4.150968 | -9.377588  |
| C | -2.392223 | -3.412034 | -9.377589  |
| C | -3.412033 | -2.392223 | -9.377589  |
| C | -4.150968 | 0.365694  | -9.377588  |
| C | -3.777712 | 1.758792  | -9.377588  |
| C | -1.758792 | 3.777712  | -9.377588  |
| C | -0.365694 | 4.150968  | -9.377588  |
| C | 2.392223  | 3.412034  | -9.377589  |
| C | 3.412034  | 2.392223  | -9.377589  |
| C | 3.416531  | -2.392677 | -8.127967  |
| C | 2.392677  | -3.416531 | -8.127967  |
| C | -0.363839 | -4.155087 | -8.127967  |
| C | -1.762459 | -3.780351 | -8.127967  |
| C | -3.780351 | -1.762459 | -8.127967  |
| C | -4.155087 | -0.363839 | -8.127967  |
| C | -3.416531 | 2.392677  | -8.127967  |
| C | -2.392677 | 3.416531  | -8.127967  |
| C | 0.363839  | 4.155087  | -8.127967  |

|   |           |           |           |
|---|-----------|-----------|-----------|
| C | 1.762459  | 3.780351  | -8.127967 |
| C | 3.780351  | 1.762459  | -8.127967 |
| C | 4.155087  | 0.363840  | -8.127967 |
| C | 1.759926  | -3.778559 | -6.879647 |
| C | 0.365136  | -4.152269 | -6.879647 |
| C | -2.392390 | -3.413440 | -6.879647 |
| C | -3.413440 | -2.392390 | -6.879647 |
| C | -4.152269 | 0.365136  | -6.879647 |
| C | -3.778559 | 1.759926  | -6.879647 |
| C | -1.759926 | 3.778559  | -6.879647 |
| C | -0.365136 | 4.152269  | -6.879647 |
| C | 2.392390  | 3.413440  | -6.879647 |
| C | 3.413440  | 2.392390  | -6.879647 |
| C | 4.152269  | -0.365135 | -6.879647 |
| C | 3.778559  | -1.759926 | -6.879647 |
| C | -0.365966 | -4.150430 | -5.626456 |
| C | -1.758286 | -3.777381 | -5.626456 |
| C | -3.777381 | -1.758287 | -5.626456 |
| C | -4.150430 | -0.365966 | -5.626456 |
| C | -3.411431 | 2.392189  | -5.626456 |
| C | -2.392189 | 3.411431  | -5.626456 |
| C | 0.365966  | 4.150430  | -5.626456 |
| C | 1.758287  | 3.777381  | -5.626456 |
| C | 3.777381  | 1.758287  | -5.626456 |
| C | 4.150430  | 0.365966  | -5.626456 |
| C | 3.411431  | -2.392189 | -5.626456 |
| C | 2.392189  | -3.411431 | -5.626456 |
| C | -2.392651 | -3.416091 | -4.375798 |
| C | -3.416090 | -2.392651 | -4.375798 |
| C | -4.154693 | 0.364037  | -4.375797 |
| C | -3.780109 | 1.762091  | -4.375797 |
| C | -1.762091 | 3.780109  | -4.375797 |
| C | -0.364037 | 4.154693  | -4.375798 |
| C | 2.392651  | 3.416091  | -4.375798 |
| C | 3.416090  | 2.392651  | -4.375798 |
| C | 4.154693  | -0.364037 | -4.375798 |
| C | 3.780109  | -1.762090 | -4.375797 |
| C | 1.762091  | -3.780109 | -4.375797 |
| C | 0.364037  | -4.154693 | -4.375797 |
| C | -3.779161 | -1.760750 | -3.128014 |
| C | -4.153202 | -0.364724 | -3.128014 |
| C | -3.414455 | 2.392500  | -3.128013 |
| C | -2.392500 | 3.414455  | -3.128013 |
| C | 0.364724  | 4.153202  | -3.128014 |
| C | 1.760750  | 3.779161  | -3.128014 |
| C | 3.779161  | 1.760750  | -3.128014 |
| C | 4.153202  | 0.364724  | -3.128014 |
| C | 3.414455  | -2.392500 | -3.128013 |
| C | 2.392500  | -3.414455 | -3.128013 |
| C | -0.364724 | -4.153202 | -3.128014 |
| C | -1.760750 | -3.779161 | -3.128014 |
| C | -4.150150 | 0.366110  | -1.875468 |
| C | -3.777211 | 1.758022  | -1.875468 |
| C | -1.758022 | 3.777211  | -1.875468 |
| C | -0.366110 | 4.150150  | -1.875468 |
| C | 2.392174  | 3.411117  | -1.875468 |
| C | 3.411117  | 2.392174  | -1.875468 |
| C | 4.150150  | -0.366109 | -1.875468 |
| C | 3.777211  | -1.758022 | -1.875468 |
| C | 1.758022  | -3.777211 | -1.875468 |
| C | 0.366110  | -4.150150 | -1.875468 |
| C | -2.392174 | -3.411117 | -1.875468 |
| C | -3.411117 | -2.392174 | -1.875468 |
| C | -3.415373 | 2.392591  | -0.623800 |
| C | -2.392591 | 3.415373  | -0.623800 |
| C | 0.364344  | 4.154042  | -0.623799 |
| C | 1.761499  | 3.779698  | -0.623799 |
| C | 3.779698  | 1.761499  | -0.623799 |
| C | 4.154042  | 0.364344  | -0.623799 |
| C | 3.415373  | -2.392591 | -0.623800 |

|   |           |           |           |
|---|-----------|-----------|-----------|
| C | 2.392591  | -3.415373 | -0.623800 |
| C | -0.364343 | -4.154041 | -0.623799 |
| C | -1.761499 | -3.779698 | -0.623799 |
| C | -3.779698 | -1.761499 | -0.623799 |
| C | -4.154041 | -0.364344 | -0.623799 |
| C | -1.761499 | 3.779698  | 0.623799  |
| C | -0.364344 | 4.154042  | 0.623799  |
| C | 2.392591  | 3.415373  | 0.623799  |
| C | 3.415373  | 2.392591  | 0.623799  |
| C | 4.154042  | -0.364343 | 0.623799  |
| C | 3.779698  | -1.761499 | 0.623799  |
| C | 1.761499  | -3.779698 | 0.623799  |
| C | 0.364344  | -4.154041 | 0.623799  |
| C | -2.392591 | -3.415373 | 0.623800  |
| C | -3.415373 | -2.392591 | 0.623800  |
| C | -4.154041 | 0.364344  | 0.623799  |
| C | -3.779698 | 1.761499  | 0.623799  |
| C | 0.366110  | 4.150150  | 1.875468  |
| C | 1.758022  | 3.777211  | 1.875468  |
| C | 3.777211  | 1.758022  | 1.875468  |
| C | 4.150150  | 0.366110  | 1.875468  |
| C | 3.411117  | -2.392174 | 1.875468  |
| C | 2.392174  | -3.411117 | 1.875468  |
| C | -0.366109 | -4.150150 | 1.875468  |
| C | -1.758022 | -3.777211 | 1.875468  |
| C | -3.777211 | -1.758022 | 1.875468  |
| C | -4.150150 | -0.366110 | 1.875468  |
| C | -3.411117 | 2.392174  | 1.875468  |
| C | -2.392174 | 3.411117  | 1.875468  |
| C | 2.392500  | 3.414455  | 3.128013  |
| C | 3.414455  | 2.392500  | 3.128013  |
| C | 4.153202  | -0.364723 | 3.128014  |
| C | 3.779161  | -1.760750 | 3.128014  |
| C | 1.760750  | -3.779161 | 3.128014  |
| C | 0.364724  | -4.153202 | 3.128014  |
| C | -2.392500 | -3.414455 | 3.128013  |
| C | -3.414455 | -2.392500 | 3.128013  |
| C | -4.153202 | 0.364724  | 3.128014  |
| C | -3.779161 | 1.760750  | 3.128014  |
| C | -1.760750 | 3.779161  | 3.128014  |
| C | -0.364724 | 4.153202  | 3.128014  |
| C | 3.780109  | 1.762091  | 4.375797  |
| C | 4.154693  | 0.364037  | 4.375797  |
| C | 3.416091  | -2.392651 | 4.375798  |
| C | 2.392651  | -3.416090 | 4.375798  |
| C | -0.364037 | -4.154693 | 4.375797  |
| C | -1.762090 | -3.780109 | 4.375797  |
| C | -3.780109 | -1.762091 | 4.375797  |
| C | -4.154693 | -0.364037 | 4.375797  |
| C | -3.416090 | 2.392651  | 4.375798  |
| C | -2.392651 | 3.416091  | 4.375798  |
| C | 0.364037  | 4.154693  | 4.375797  |
| C | 1.762091  | 3.780109  | 4.375797  |
| C | 4.150430  | -0.365966 | 5.626456  |
| C | 3.777381  | -1.758286 | 5.626456  |
| C | 1.758287  | -3.777381 | 5.626456  |
| C | 0.365966  | -4.150430 | 5.626456  |
| C | -2.392189 | -3.411431 | 5.626456  |
| C | -3.411431 | -2.392189 | 5.626456  |
| C | -4.150430 | 0.365966  | 5.626456  |
| C | -3.777381 | 1.758287  | 5.626456  |
| C | -1.758287 | 3.777381  | 5.626456  |
| C | -0.365966 | 4.150430  | 5.626456  |
| C | 2.392189  | 3.411431  | 5.626456  |
| C | 3.411431  | 2.392189  | 5.626456  |
| C | 3.413440  | -2.392390 | 6.879647  |
| C | 2.392390  | -3.413440 | 6.879647  |
| C | -0.365135 | -4.152269 | 6.879647  |
| C | -1.759926 | -3.778559 | 6.879647  |
| C | -3.778559 | -1.759926 | 6.879647  |

|   |           |           |           |
|---|-----------|-----------|-----------|
| C | -4.152269 | -0.365136 | 6.879647  |
| C | -3.413440 | 2.392390  | 6.879647  |
| C | -2.392390 | 3.413440  | 6.879647  |
| C | 0.365136  | 4.152269  | 6.879647  |
| C | 1.759926  | 3.778559  | 6.879647  |
| C | 3.778559  | 1.759926  | 6.879647  |
| C | 4.152269  | 0.365136  | 6.879647  |
| C | 1.762459  | -3.780351 | 8.127967  |
| C | 0.363840  | -4.155087 | 8.127967  |
| C | -2.392677 | -3.416531 | 8.127967  |
| C | -3.416531 | -2.392677 | 8.127967  |
| C | -4.155087 | 0.363839  | 8.127967  |
| C | -3.780351 | 1.762459  | 8.127967  |
| C | -1.762459 | 3.780351  | 8.127967  |
| C | -0.363839 | 4.155087  | 8.127967  |
| C | 2.392677  | 3.416531  | 8.127967  |
| C | 3.416531  | 2.392677  | 8.127967  |
| C | 4.155087  | -0.363839 | 8.127967  |
| C | 3.780351  | -1.762459 | 8.127967  |
| C | -0.365694 | -4.150968 | 9.377588  |
| C | -1.758791 | -3.777712 | 9.377588  |
| C | -3.777712 | -1.758792 | 9.377588  |
| C | -4.150968 | -0.365694 | 9.377588  |
| C | -3.412034 | 2.392223  | 9.377589  |
| C | -2.392223 | 3.412034  | 9.377589  |
| C | 0.365694  | 4.150968  | 9.377588  |
| C | 1.758792  | 3.777712  | 9.377588  |
| C | 3.777712  | 1.758792  | 9.377588  |
| C | 4.150968  | 0.365694  | 9.377588  |
| C | 3.412034  | -2.392223 | 9.377589  |
| C | 2.392223  | -3.412033 | 9.377589  |
| C | -2.392276 | -3.412443 | 10.631116 |
| C | -3.412443 | -2.392276 | 10.631116 |
| C | -4.151349 | 0.365536  | 10.631116 |
| C | -3.777962 | 1.759119  | 10.631116 |
| C | -1.759119 | 3.777962  | 10.631116 |
| C | -0.365536 | 4.151349  | 10.631116 |
| C | 2.392276  | 3.412443  | 10.631116 |
| C | 3.412443  | 2.392276  | 10.631116 |
| C | 4.151349  | -0.365535 | 10.631116 |
| C | 3.777962  | -1.759119 | 10.631116 |
| C | 1.759119  | -3.777962 | 10.631116 |
| C | 0.365536  | -4.151349 | 10.631116 |
| C | -3.780404 | -1.762563 | 11.880264 |
| C | -4.155184 | -0.363777 | 11.880264 |
| C | -3.416647 | 2.392672  | 11.880264 |
| C | -2.392672 | 3.416647  | 11.880264 |
| C | 0.363777  | 4.155185  | 11.880264 |
| C | 1.762563  | 3.780405  | 11.880264 |
| C | 3.780405  | 1.762563  | 11.880264 |
| C | 4.155185  | 0.363777  | 11.880264 |
| C | 3.416647  | -2.392672 | 11.880264 |
| C | 2.392672  | -3.416647 | 11.880264 |
| C | -0.363776 | -4.155184 | 11.880264 |
| C | -1.762562 | -3.780404 | 11.880264 |
| C | -4.151723 | 0.365322  | 13.128930 |
| C | -3.778180 | 1.759492  | 13.128930 |
| C | -1.759492 | 3.778180  | 13.128930 |
| C | -0.365322 | 4.151724  | 13.128930 |
| C | 2.392279  | 3.412875  | 13.128931 |
| C | 3.412874  | 2.392279  | 13.128931 |
| C | 4.151724  | -0.365322 | 13.128930 |
| C | 3.778180  | -1.759492 | 13.128930 |
| C | 1.759492  | -3.778180 | 13.128930 |
| C | 0.365322  | -4.151723 | 13.128930 |
| C | -2.392279 | -3.412874 | 13.128930 |
| C | -3.412874 | -2.392279 | 13.128930 |
| C | -3.411575 | 2.392175  | 14.382439 |
| C | -2.392175 | 3.411575  | 14.382439 |
| C | 0.365882  | 4.150547  | 14.382439 |



|   |           |           |           |
|---|-----------|-----------|-----------|
| C | 1.758418  | 3.777441  | 14.382439 |
| C | 3.777441  | 1.758418  | 14.382439 |
| C | 4.150547  | 0.365882  | 14.382439 |
| C | 3.411575  | -2.392175 | 14.382439 |
| C | 2.392175  | -3.411575 | 14.382439 |
| C | -0.365882 | -4.150547 | 14.382439 |
| C | -1.758418 | -3.777441 | 14.382439 |
| C | -3.777441 | -1.758418 | 14.382439 |
| C | -4.150547 | -0.365882 | 14.382439 |
| C | -1.762384 | 3.780265  | 15.632622 |
| C | -0.363861 | 4.154974  | 15.632622 |
| C | 2.392640  | 3.416423  | 15.632622 |
| C | 3.416423  | 2.392640  | 15.632622 |
| C | 4.154974  | -0.363861 | 15.632622 |
| C | 3.780265  | -1.762384 | 15.632622 |
| C | 1.762384  | -3.780265 | 15.632622 |
| C | 0.363861  | -4.154974 | 15.632622 |
| C | -2.392640 | -3.416422 | 15.632622 |
| C | -3.416422 | -2.392640 | 15.632622 |
| C | -4.154974 | 0.363861  | 15.632622 |
| C | -3.780265 | 1.762384  | 15.632622 |
| C | 0.364887  | 4.152633  | 16.880516 |
| C | 1.760323  | 3.778750  | 16.880516 |
| C | 3.778750  | 1.760324  | 16.880516 |
| C | 4.152633  | 0.364887  | 16.880516 |
| C | 3.413880  | -2.392357 | 16.880516 |
| C | 2.392357  | -3.413880 | 16.880516 |
| C | -0.364887 | -4.152633 | 16.880516 |
| C | -1.760323 | -3.778750 | 16.880516 |
| C | -3.778750 | -1.760323 | 16.880516 |
| C | -4.152633 | -0.364887 | 16.880516 |
| C | -3.413880 | 2.392357  | 16.880516 |
| C | -2.392357 | 3.413880  | 16.880516 |
| C | 2.392100  | 3.410935  | 18.133633 |
| C | 3.410935  | 2.392100  | 18.133633 |
| C | 4.149957  | -0.366137 | 18.133633 |
| C | 3.777057  | -1.757902 | 18.133633 |
| C | 1.757902  | -3.777057 | 18.133633 |
| C | 0.366137  | -4.149957 | 18.133633 |
| C | -2.392100 | -3.410935 | 18.133633 |
| C | -3.410935 | -2.392100 | 18.133633 |
| C | -4.149957 | 0.366137  | 18.133633 |
| C | -3.777057 | 1.757902  | 18.133633 |
| C | -1.757902 | 3.777057  | 18.133633 |
| C | -0.366137 | 4.149957  | 18.133633 |
| C | 3.779941  | 1.761930  | 19.384958 |
| C | 4.154467  | 0.364092  | 19.384958 |
| C | 3.415868  | -2.392587 | 19.384958 |
| C | 2.392587  | -3.415867 | 19.384958 |
| C | -0.364092 | -4.154467 | 19.384958 |
| C | -1.761929 | -3.779941 | 19.384958 |
| C | -3.779941 | -1.761929 | 19.384958 |
| C | -4.154467 | -0.364092 | 19.384958 |
| C | -3.415868 | 2.392587  | 19.384958 |
| C | -2.392587 | 3.415868  | 19.384958 |
| C | 0.364092  | 4.154467  | 19.384958 |
| C | 1.761930  | 3.779941  | 19.384958 |
| C | 4.153616  | -0.364431 | 20.632352 |
| C | 3.779374  | -1.761211 | 20.632351 |
| C | 1.761212  | -3.779374 | 20.632351 |
| C | 0.364431  | -4.153616 | 20.632352 |
| C | -2.392453 | -3.414960 | 20.632352 |
| C | -3.414960 | -2.392453 | 20.632352 |
| C | -4.153616 | 0.364431  | 20.632352 |
| C | -3.779374 | 1.761212  | 20.632351 |
| C | -1.761211 | 3.779374  | 20.632351 |
| C | -0.364431 | 4.153616  | 20.632352 |
| C | 2.392453  | 3.414960  | 20.632352 |
| C | 3.414960  | 2.392453  | 20.632352 |
| C | 3.410601  | -2.392061 | 21.884723 |

|   |           |           |           |
|---|-----------|-----------|-----------|
| C | 2.392061  | -3.410601 | 21.884723 |
| C | -0.366269 | -4.149646 | 21.884723 |
| C | -1.757631 | -3.776854 | 21.884723 |
| C | -3.776854 | -1.757631 | 21.884723 |
| C | -4.149646 | -0.366269 | 21.884723 |
| C | -3.410601 | 2.392061  | 21.884723 |
| C | -2.392061 | 3.410601  | 21.884723 |
| C | 0.366269  | 4.149646  | 21.884723 |
| C | 1.757631  | 3.776854  | 21.884723 |
| C | 3.776854  | 1.757631  | 21.884723 |
| C | 4.149646  | 0.366269  | 21.884723 |
| C | 1.761227  | -3.779454 | 23.137189 |
| C | 0.364458  | -4.153693 | 23.137189 |
| C | -2.392514 | -3.415013 | 23.137189 |
| C | -3.415013 | -2.392514 | 23.137189 |
| C | -4.153693 | 0.364458  | 23.137189 |
| C | -3.779454 | 1.761227  | 23.137189 |
| C | -1.761227 | 3.779454  | 23.137189 |
| C | -0.364458 | 4.153693  | 23.137189 |
| C | 2.392514  | 3.415013  | 23.137189 |
| C | 3.415013  | 2.392514  | 23.137189 |
| C | 4.153693  | -0.364458 | 23.137189 |
| C | 3.779454  | -1.761227 | 23.137189 |
| C | -0.363994 | -4.154585 | 24.384425 |
| C | -1.762073 | -3.779994 | 24.384425 |
| C | -3.779994 | -1.762073 | 24.384425 |
| C | -4.154585 | -0.363994 | 24.384425 |
| C | -3.416020 | 2.392562  | 24.384425 |
| C | -2.392562 | 3.416020  | 24.384425 |
| C | 0.363994  | 4.154585  | 24.384425 |
| C | 1.762073  | 3.779994  | 24.384425 |
| C | 3.779994  | 1.762073  | 24.384425 |
| C | 4.154585  | 0.363994  | 24.384425 |
| C | 3.416020  | -2.392562 | 24.384425 |
| C | 2.392562  | -3.416020 | 24.384425 |
| C | -2.392057 | -3.410620 | 25.635736 |
| C | -3.410620 | -2.392057 | 25.635736 |
| C | -4.149664 | 0.366259  | 25.635735 |
| C | -3.776865 | 1.757652  | 25.635735 |
| C | -1.757652 | 3.776865  | 25.635735 |
| C | -0.366258 | 4.149664  | 25.635735 |
| C | 2.392057  | 3.410620  | 25.635736 |
| C | 3.410620  | 2.392057  | 25.635736 |
| C | 4.149664  | -0.366258 | 25.635735 |
| C | 3.776865  | -1.757652 | 25.635735 |
| C | 1.757652  | -3.776865 | 25.635735 |
| C | 0.366258  | -4.149664 | 25.635735 |
| C | -3.778827 | -1.760312 | 26.889240 |
| C | -4.152696 | -0.364934 | 26.889239 |
| C | -3.413913 | 2.392433  | 26.889239 |
| C | -2.392433 | 3.413913  | 26.889239 |
| C | 0.364934  | 4.152696  | 26.889239 |
| C | 1.760312  | 3.778827  | 26.889240 |
| C | 3.778827  | 1.760312  | 26.889240 |
| C | 4.152696  | 0.364934  | 26.889239 |
| C | 3.413913  | -2.392433 | 26.889239 |
| C | 2.392433  | -3.413913 | 26.889239 |
| C | -0.364934 | -4.152696 | 26.889239 |
| C | -1.760312 | -3.778827 | 26.889240 |
| C | -4.155457 | 0.363620  | 28.136712 |
| C | -3.780563 | 1.762838  | 28.136712 |
| C | -1.762838 | 3.780563  | 28.136712 |
| C | -0.363620 | 4.155457  | 28.136712 |
| C | 2.392668  | 3.416960  | 28.136712 |
| C | 3.416960  | 2.392668  | 28.136712 |
| C | 4.155457  | -0.363620 | 28.136712 |
| C | 3.780563  | -1.762838 | 28.136712 |
| C | 1.762838  | -3.780563 | 28.136712 |
| C | 0.363620  | -4.155457 | 28.136712 |
| C | -2.392668 | -3.416960 | 28.136712 |

|   |           |           |           |
|---|-----------|-----------|-----------|
| C | -3.416960 | -2.392668 | 28.136712 |
| C | -3.411036 | 2.392098  | 29.386701 |
| C | -2.392098 | 3.411036  | 29.386701 |
| C | 0.366081  | 4.150037  | 29.386701 |
| C | 1.757986  | 3.777098  | 29.386701 |
| C | 3.777098  | 1.757986  | 29.386701 |
| C | 4.150037  | 0.366081  | 29.386701 |
| C | 3.411036  | -2.392098 | 29.386701 |
| C | 2.392098  | -3.411036 | 29.386701 |
| C | -0.366081 | -4.150037 | 29.386701 |
| C | -1.757986 | -3.777098 | 29.386701 |
| C | -3.777098 | -1.757986 | 29.386701 |
| C | -4.150037 | -0.366081 | 29.386701 |
| C | -1.759222 | 3.778080  | 30.641044 |
| C | -0.365509 | 4.151499  | 30.641044 |
| C | 2.392322  | 3.412583  | 30.641043 |
| C | 3.412583  | 2.392322  | 30.641043 |
| C | 4.151499  | -0.365509 | 30.641044 |
| C | 3.778080  | -1.759222 | 30.641044 |
| C | 1.759222  | -3.778080 | 30.641044 |
| C | 0.365509  | -4.151499 | 30.641043 |
| C | -2.392322 | -3.412583 | 30.641043 |
| C | -3.412583 | -2.392322 | 30.641043 |
| C | -4.151499 | 0.365509  | 30.641043 |
| C | -3.778080 | 1.759222  | 30.641044 |
| C | 0.363322  | 4.156118  | 31.889207 |
| C | 1.763417  | 3.780985  | 31.889207 |
| C | 3.780985  | 1.763417  | 31.889207 |
| C | 4.156118  | 0.363322  | 31.889207 |
| C | 3.417687  | -2.392753 | 31.889207 |
| C | 2.392752  | -3.417687 | 31.889207 |
| C | -0.363322 | -4.156118 | 31.889207 |
| C | -1.763417 | -3.780985 | 31.889207 |
| C | -3.780985 | -1.763417 | 31.889207 |
| C | -4.156118 | -0.363322 | 31.889207 |
| C | -3.417687 | 2.392752  | 31.889207 |
| C | -2.392752 | 3.417687  | 31.889207 |
| C | 2.392131  | 3.411837  | 33.137654 |
| C | 3.411837  | 2.392131  | 33.137654 |
| C | 4.150759  | -0.365718 | 33.137654 |
| C | 3.777544  | -1.758673 | 33.137654 |
| C | 1.758673  | -3.777544 | 33.137654 |
| C | 0.365718  | -4.150759 | 33.137654 |
| C | -2.392131 | -3.411837 | 33.137654 |
| C | -3.411837 | -2.392131 | 33.137654 |
| C | -4.150759 | 0.365718  | 33.137654 |
| C | -3.777544 | 1.758673  | 33.137654 |
| C | -1.758673 | 3.777544  | 33.137654 |
| C | -0.365718 | 4.150759  | 33.137654 |
| C | 3.777203  | 1.757940  | 34.392556 |
| C | 4.150107  | 0.366171  | 34.392556 |
| C | 3.411053  | -2.392215 | 34.392557 |
| C | 2.392214  | -3.411053 | 34.392557 |
| C | -0.366171 | -4.150107 | 34.392556 |
| C | -1.757940 | -3.777203 | 34.392556 |
| C | -3.777203 | -1.757940 | 34.392556 |
| C | -4.150107 | -0.366171 | 34.392556 |
| C | -3.411053 | 2.392214  | 34.392557 |
| C | -2.392214 | 3.411053  | 34.392557 |
| C | 0.366171  | 4.150107  | 34.392556 |
| C | 1.757940  | 3.777203  | 34.392556 |
| C | 4.156810  | -0.363163 | 35.642005 |
| C | 3.781507  | -1.763916 | 35.642006 |
| C | 1.763916  | -3.781507 | 35.642006 |
| C | 0.363162  | -4.156810 | 35.642005 |
| C | -2.392944 | -3.418359 | 35.642003 |
| C | -3.418359 | -2.392944 | 35.642003 |
| C | -4.156810 | 0.363162  | 35.642005 |
| C | -3.781507 | 1.763916  | 35.642006 |
| C | -1.763916 | 3.781507  | 35.642006 |

|   |           |           |           |
|---|-----------|-----------|-----------|
| C | -0.363162 | 4.156810  | 35.642005 |
| C | 2.392944  | 3.418359  | 35.642004 |
| C | 3.418359  | 2.392943  | 35.642004 |
| C | 3.413742  | -2.392605 | 36.888606 |
| C | 2.392605  | -3.413742 | 36.888606 |
| C | -0.365165 | -4.152628 | 36.888604 |
| C | -1.760073 | -3.778884 | 36.888602 |
| C | -3.778884 | -1.760073 | 36.888602 |
| C | -4.152628 | -0.365165 | 36.888604 |
| C | -3.413742 | 2.392605  | 36.888606 |
| C | -2.392605 | 3.413742  | 36.888606 |
| C | 0.365165  | 4.152628  | 36.888604 |
| C | 1.760073  | 3.778884  | 36.888602 |
| C | 3.778884  | 1.760072  | 36.888602 |
| C | 4.152628  | 0.365165  | 36.888604 |
| C | 1.756446  | -3.776681 | 38.143569 |
| C | 0.367214  | -4.148898 | 38.143567 |
| C | -2.392496 | -3.409475 | 38.143563 |
| C | -3.409475 | -2.392496 | 38.143563 |
| C | -4.148898 | 0.367215  | 38.143567 |
| C | -3.776681 | 1.756446  | 38.143569 |
| C | -1.756446 | 3.776681  | 38.143569 |
| C | -0.367215 | 4.148898  | 38.143567 |
| C | 2.392496  | 3.409475  | 38.143563 |
| C | 3.409475  | 2.392496  | 38.143563 |
| C | 4.148898  | -0.367215 | 38.143567 |
| C | 3.776681  | -1.756446 | 38.143569 |
| C | -0.362974 | -4.155898 | 39.395327 |
| C | -1.763608 | -3.780618 | 39.395324 |
| C | -3.780618 | -1.763608 | 39.395324 |
| C | -4.155898 | -0.362973 | 39.395327 |
| C | -3.417668 | 2.392338  | 39.395331 |
| C | -2.392338 | 3.417667  | 39.395331 |
| C | 0.362973  | 4.155897  | 39.395327 |
| C | 1.763608  | 3.780618  | 39.395324 |
| C | 3.780618  | 1.763608  | 39.395324 |
| C | 4.155897  | 0.362973  | 39.395327 |
| C | 3.417667  | -2.392338 | 39.395331 |
| C | 2.392338  | -3.417668 | 39.395331 |
| C | -2.389158 | -3.411522 | 40.639341 |
| C | -3.411522 | -2.389158 | 40.639341 |
| C | -4.149003 | 0.363300  | 40.639348 |
| C | -3.774807 | 1.759883  | 40.639351 |
| C | -1.759883 | 3.774807  | 40.639351 |
| C | -0.363300 | 4.149003  | 40.639348 |
| C | 2.389158  | 3.411522  | 40.639341 |
| C | 3.411522  | 2.389158  | 40.639341 |
| C | 4.149003  | -0.363300 | 40.639348 |
| C | 3.774807  | -1.759883 | 40.639351 |
| C | 1.759882  | -3.774807 | 40.639351 |
| C | 0.363300  | -4.149003 | 40.639348 |
| C | -3.762222 | -1.748207 | 41.894028 |
| C | -4.132276 | -0.367111 | 41.894037 |
| C | -3.395115 | 2.384088  | 41.894042 |
| C | -2.384088 | 3.395114  | 41.894042 |
| C | 0.367111  | 4.132276  | 41.894037 |
| C | 1.748207  | 3.762221  | 41.894028 |
| C | 3.762221  | 1.748206  | 41.894028 |
| C | 4.132276  | 0.367111  | 41.894037 |
| C | 3.395114  | -2.384088 | 41.894042 |
| C | 2.384088  | -3.395115 | 41.894042 |
| C | -0.367112 | -4.132276 | 41.894037 |
| C | -1.748207 | -3.762221 | 41.894028 |
| C | -4.146109 | 0.359157  | 43.154701 |
| C | -3.770224 | 1.762004  | 43.154698 |
| C | -1.762004 | 3.770224  | 43.154698 |
| C | -0.359157 | 4.146109  | 43.154701 |
| C | 2.384136  | 3.411086  | 43.154677 |
| C | 3.411086  | 2.384136  | 43.154677 |
| C | 4.146109  | -0.359157 | 43.154701 |

|   |           |           |            |
|---|-----------|-----------|------------|
| C | 3.770224  | -1.762005 | 43.154698  |
| C | 1.762004  | -3.770224 | 43.154698  |
| C | 0.359156  | -4.146109 | 43.154701  |
| C | -2.384136 | -3.411086 | 43.154677  |
| C | -3.411086 | -2.384136 | 43.154677  |
| C | -3.450631 | 2.412579  | 44.395117  |
| C | -2.412579 | 3.450630  | 44.395117  |
| C | 0.364045  | 4.194575  | 44.395118  |
| C | 1.782067  | 3.814670  | 44.395095  |
| C | 3.814670  | 1.782067  | 44.395095  |
| C | 4.194575  | 0.364045  | 44.395118  |
| C | 3.450630  | -2.412579 | 44.395117  |
| C | 2.412579  | -3.450631 | 44.395117  |
| C | -0.364045 | -4.194575 | 44.395118  |
| C | -1.782067 | -3.814671 | 44.395095  |
| C | -3.814671 | -1.782067 | 44.395095  |
| C | -4.194575 | -0.364045 | 44.395118  |
| C | -1.757890 | 3.888863  | 45.611550  |
| C | -0.422026 | 4.246768  | 45.611552  |
| C | 2.489010  | 3.466921  | 45.611518  |
| C | 3.466921  | 2.489009  | 45.611518  |
| C | 4.246768  | -0.422026 | 45.611552  |
| C | 3.888863  | -1.757891 | 45.611550  |
| C | 1.757890  | -3.888863 | 45.611550  |
| C | 0.422026  | -4.246768 | 45.611552  |
| C | -2.489010 | -3.466921 | 45.611518  |
| C | -3.466921 | -2.489010 | 45.611518  |
| C | -4.246768 | 0.422026  | 45.611552  |
| C | -3.888863 | 1.757890  | 45.611550  |
| H | -3.891958 | 2.156676  | -46.567379 |
| H | -2.156676 | 3.891958  | -46.567379 |
| H | -0.078301 | 4.448624  | -46.567428 |
| H | 2.292121  | 3.813522  | -46.567424 |
| H | 3.813522  | 2.292121  | -46.567424 |
| H | 4.448624  | -0.078301 | -46.567428 |
| H | 3.891958  | -2.156676 | -46.567379 |
| H | 2.156675  | -3.891958 | -46.567379 |
| H | 0.078300  | -4.448624 | -46.567428 |
| H | -2.292121 | -3.813522 | -46.567424 |
| H | -3.813522 | -2.292121 | -46.567424 |
| H | -4.448624 | 0.078301  | -46.567428 |
| H | -2.292121 | 3.813522  | 46.567424  |
| H | 0.078300  | 4.448624  | 46.567428  |
| H | 2.156676  | 3.891958  | 46.567379  |
| H | 3.891958  | 2.156675  | 46.567379  |
| H | 4.448624  | 0.078300  | 46.567428  |
| H | 3.813522  | -2.292121 | 46.567424  |
| H | 2.292121  | -3.813522 | 46.567424  |
| H | -0.078301 | -4.448624 | 46.567428  |
| H | -2.156676 | -3.891958 | 46.567379  |
| H | -3.891958 | -2.156676 | 46.567379  |
| H | -4.448624 | -0.078301 | 46.567428  |
| H | -3.813522 | 2.292121  | 46.567424  |

Nanotube (6,6) u37v6s  
B3LYP/STO-3G Energy: -33897.181946

|   |           |           |           |
|---|-----------|-----------|-----------|
| 6 | 2.878702  | 3.153227  | 46.220317 |
| 6 | 1.718057  | 3.908717  | 46.220302 |
| 6 | -1.291424 | 4.069642  | 46.220317 |
| 6 | -2.526020 | 3.442240  | 46.220302 |
| 6 | -4.170126 | 0.916415  | 46.220317 |
| 6 | -4.244077 | -0.466477 | 46.220302 |
| 6 | -2.878702 | -3.153227 | 46.220317 |
| 6 | -1.718057 | -3.908717 | 46.220302 |
| 6 | 1.291424  | -4.069642 | 46.220317 |
| 6 | 2.526020  | -3.442240 | 46.220302 |
| 6 | 4.170126  | -0.916415 | 46.220317 |

|   |           |           |           |
|---|-----------|-----------|-----------|
| 6 | 4.244077  | 0.466477  | 46.220302 |
| 6 | 0.956105  | 4.103438  | 45.005756 |
| 6 | -0.513036 | 4.182003  | 45.005770 |
| 6 | -3.075629 | 2.879730  | 45.005756 |
| 6 | -3.878239 | 1.646699  | 45.005770 |
| 6 | -4.031734 | -1.223708 | 45.005756 |
| 6 | -3.365203 | -2.535304 | 45.005770 |
| 6 | -0.956105 | -4.103438 | 45.005756 |
| 6 | 0.513036  | -4.182003 | 45.005770 |
| 6 | 3.075629  | -2.879730 | 45.005756 |
| 6 | 3.878239  | -1.646699 | 45.005770 |
| 6 | 4.031734  | 1.223708  | 45.005756 |
| 6 | 3.365203  | 2.535304  | 45.005770 |
| 6 | -1.209474 | 3.982053  | 43.765636 |
| 6 | -2.503564 | 3.324447  | 43.765628 |
| 6 | -4.053296 | 0.943592  | 43.765636 |
| 6 | -4.130838 | -0.505926 | 43.765628 |
| 6 | -2.843822 | -3.038461 | 43.765636 |
| 6 | -1.627274 | -3.830374 | 43.765628 |
| 6 | 1.209474  | -3.982053 | 43.765636 |
| 6 | 2.503564  | -3.324447 | 43.765628 |
| 6 | 4.053296  | -0.943592 | 43.765636 |
| 6 | 4.130838  | 0.505926  | 43.765628 |
| 6 | 2.843822  | 3.038461  | 43.765636 |
| 6 | 1.627274  | 3.830374  | 43.765628 |
| 6 | -3.035555 | 2.829665  | 42.503799 |
| 6 | -3.816247 | 1.630309  | 42.503799 |
| 6 | -3.968339 | -1.214035 | 42.503799 |
| 6 | -3.320013 | -2.489812 | 42.503799 |
| 6 | -0.932784 | -4.043700 | 42.503799 |
| 6 | 0.496234  | -4.120122 | 42.503799 |
| 6 | 3.035555  | -2.829665 | 42.503799 |
| 6 | 3.816247  | -1.630309 | 42.503799 |
| 6 | 3.968339  | 1.214035  | 42.503799 |
| 6 | 3.320013  | 2.489812  | 42.503799 |
| 6 | 0.932784  | 4.043700  | 42.503799 |
| 6 | -0.496234 | 4.120122  | 42.503799 |
| 6 | -4.059796 | 0.942757  | 41.251157 |
| 6 | -4.137170 | -0.504445 | 41.251154 |
| 6 | -2.846350 | -3.044508 | 41.251157 |
| 6 | -1.631723 | -3.835117 | 41.251154 |
| 6 | 1.213446  | -3.987265 | 41.251157 |
| 6 | 2.505447  | -3.330672 | 41.251154 |
| 6 | 4.059796  | -0.942757 | 41.251157 |
| 6 | 4.137170  | 0.504445  | 41.251154 |
| 6 | 2.846350  | 3.044508  | 41.251157 |
| 6 | 1.631723  | 3.835117  | 41.251154 |
| 6 | -1.213446 | 3.987265  | 41.251157 |
| 6 | -2.505447 | 3.330672  | 41.251154 |
| 6 | -3.990895 | -1.215250 | 40.007936 |
| 6 | -3.334312 | -2.507333 | 40.007937 |
| 6 | -0.943010 | -4.063841 | 40.007936 |
| 6 | 0.504258  | -4.141265 | 40.007937 |
| 6 | 3.047885  | -2.848591 | 40.007936 |
| 6 | 3.838570  | -1.633933 | 40.007937 |
| 6 | 3.990895  | 1.215250  | 40.007936 |
| 6 | 3.334312  | 2.507333  | 40.007937 |
| 6 | 0.943010  | 4.063841  | 40.007936 |
| 6 | -0.504258 | 4.141265  | 40.007937 |
| 6 | -3.047885 | 2.848591  | 40.007936 |
| 6 | -3.838570 | 1.633933  | 40.007937 |
| 6 | -2.841483 | -3.046657 | 38.754473 |
| 6 | -1.635647 | -3.831559 | 38.754469 |
| 6 | 1.217742  | -3.984125 | 38.754473 |
| 6 | 2.500403  | -3.332291 | 38.754469 |
| 6 | 4.059224  | -0.937467 | 38.754473 |
| 6 | 4.136051  | 0.499267  | 38.754469 |
| 6 | 2.841483  | 3.046657  | 38.754473 |
| 6 | 1.635647  | 3.831559  | 38.754469 |
| 6 | -1.217742 | 3.984125  | 38.754473 |

|   |           |           |           |
|---|-----------|-----------|-----------|
| 6 | -2.500403 | 3.332291  | 38.754469 |
| 6 | -4.059224 | 0.937467  | 38.754473 |
| 6 | -4.136051 | -0.499267 | 38.754469 |
| 6 | -0.942403 | -4.064118 | 37.501365 |
| 6 | 0.503662  | -4.141425 | 37.501366 |
| 6 | 3.048427  | -2.848204 | 37.501365 |
| 6 | 3.838410  | -1.634528 | 37.501366 |
| 6 | 3.990831  | 1.215913  | 37.501365 |
| 6 | 3.334748  | 2.506897  | 37.501366 |
| 6 | 0.942403  | 4.064118  | 37.501365 |
| 6 | -0.503662 | 4.141425  | 37.501366 |
| 6 | -3.048427 | 2.848204  | 37.501365 |
| 6 | -3.838410 | 1.634528  | 37.501366 |
| 6 | -3.990831 | -1.215913 | 37.501365 |
| 6 | -3.334748 | -2.506897 | 37.501366 |
| 6 | 1.215560  | -3.991944 | 36.256250 |
| 6 | 2.508020  | -3.335165 | 36.256249 |
| 6 | 4.064905  | -0.943266 | 36.256250 |
| 6 | 4.142347  | 0.504426  | 36.256249 |
| 6 | 2.849345  | 3.048678  | 36.256250 |
| 6 | 1.634328  | 3.839591  | 36.256249 |
| 6 | -1.215560 | 3.991944  | 36.256250 |
| 6 | -2.508020 | 3.335165  | 36.256249 |
| 6 | -4.064905 | 0.943266  | 36.256250 |
| 6 | -4.142347 | -0.504426 | 36.256249 |
| 6 | -2.849345 | -3.048678 | 36.256250 |
| 6 | -1.634328 | -3.839591 | 36.256249 |
| 6 | 3.046468  | -2.842366 | 35.004686 |
| 6 | 3.832299  | -1.635094 | 35.004683 |
| 6 | 3.984795  | 1.217135  | 35.004686 |
| 6 | 3.332182  | 2.501322  | 35.004683 |
| 6 | 0.938327  | 4.059501  | 35.004686 |
| 6 | -0.500117 | 4.136415  | 35.004683 |
| 6 | -3.046468 | 2.842366  | 35.004686 |
| 6 | -3.832299 | 1.635094  | 35.004683 |
| 6 | -3.984795 | -1.217135 | 35.004686 |
| 6 | -3.332182 | -2.501322 | 35.004683 |
| 6 | -0.938327 | -4.059501 | 35.004686 |
| 6 | 0.500117  | -4.136415 | 35.004683 |
| 6 | 4.062732  | -0.941501 | 33.751219 |
| 6 | 4.139948  | 0.502935  | 33.751220 |
| 6 | 2.846730  | 3.047678  | 33.751219 |
| 6 | 1.634420  | 3.836767  | 33.751220 |
| 6 | -1.216002 | 3.989180  | 33.751219 |
| 6 | -2.505528 | 3.333832  | 33.751220 |
| 6 | -4.062732 | 0.941501  | 33.751219 |
| 6 | -4.139948 | -0.502935 | 33.751220 |
| 6 | -2.846730 | -3.047678 | 33.751219 |
| 6 | -1.634420 | -3.836767 | 33.751220 |
| 6 | 1.216002  | -3.989180 | 33.751219 |
| 6 | 2.505528  | -3.333832 | 33.751220 |
| 6 | 3.991768  | 1.215504  | 32.505039 |
| 6 | 3.335004  | 2.507927  | 32.505039 |
| 6 | 0.943227  | 4.064725  | 32.505039 |
| 6 | -0.504427 | 4.142161  | 32.505039 |
| 6 | -3.048541 | 2.849221  | 32.505039 |
| 6 | -3.839431 | 1.634234  | 32.505039 |
| 6 | -3.991768 | -1.215504 | 32.505039 |
| 6 | -3.335004 | -2.507927 | 32.505039 |
| 6 | -0.943227 | -4.064725 | 32.505039 |
| 6 | 0.504427  | -4.142161 | 32.505039 |
| 6 | 3.048541  | -2.849221 | 32.505039 |
| 6 | 3.839431  | -1.634234 | 32.505039 |
| 6 | 2.843154  | 3.046711  | 31.254586 |
| 6 | 1.634980  | 3.833126  | 31.254584 |
| 6 | -1.216952 | 3.985599  | 31.254586 |
| 6 | -2.502095 | 3.332497  | 31.254584 |
| 6 | -4.060106 | 0.938889  | 31.254586 |
| 6 | -4.137075 | -0.500629 | 31.254584 |
| 6 | -2.843154 | -3.046711 | 31.254586 |

|   |           |           |           |
|---|-----------|-----------|-----------|
| 6 | -1.634980 | -3.833126 | 31.254584 |
| 6 | 1.216952  | -3.985599 | 31.254586 |
| 6 | 2.502095  | -3.332497 | 31.254584 |
| 6 | 4.060106  | -0.938889 | 31.254586 |
| 6 | 4.137075  | 0.500629  | 31.254584 |
| 6 | 0.940974  | 4.062241  | 30.001030 |
| 6 | -0.502479 | 4.139401  | 30.001032 |
| 6 | -3.047517 | 2.846027  | 30.001030 |
| 6 | -3.836066 | 1.634541  | 30.001032 |
| 6 | -3.988491 | -1.216213 | 30.001030 |
| 6 | -3.333587 | -2.504860 | 30.001032 |
| 6 | -0.940974 | -4.062241 | 30.001030 |
| 6 | 0.502479  | -4.139401 | 30.001032 |
| 6 | 3.047517  | -2.846027 | 30.001030 |
| 6 | 3.836066  | -1.634541 | 30.001032 |
| 6 | 3.988491  | 1.216213  | 30.001030 |
| 6 | 3.333587  | 2.504860  | 30.001032 |
| 6 | -1.215517 | 3.991795  | 28.754074 |
| 6 | -2.507953 | 3.335021  | 28.754074 |
| 6 | -4.064754 | 0.943229  | 28.754074 |
| 6 | -4.142189 | -0.504441 | 28.754074 |
| 6 | -2.849237 | -3.048566 | 28.754074 |
| 6 | -1.634236 | -3.839461 | 28.754074 |
| 6 | 1.215517  | -3.991795 | 28.754074 |
| 6 | 2.507953  | -3.335021 | 28.754074 |
| 6 | 4.064754  | -0.943229 | 28.754074 |
| 6 | 4.142189  | 0.504441  | 28.754074 |
| 6 | 2.849237  | 3.048566  | 28.754074 |
| 6 | 1.634236  | 3.839461  | 28.754074 |
| 6 | -3.046911 | 2.843788  | 27.504406 |
| 6 | -3.833791 | 1.634895  | 27.504404 |
| 6 | -3.986248 | -1.216809 | 27.504406 |
| 6 | -3.332757 | -2.502713 | 27.504404 |
| 6 | -0.939337 | -4.060596 | 27.504406 |
| 6 | 0.501035  | -4.137609 | 27.504404 |
| 6 | 3.046911  | -2.843788 | 27.504406 |
| 6 | 3.833791  | -1.634895 | 27.504404 |
| 6 | 3.986248  | 1.216809  | 27.504406 |
| 6 | 3.332757  | 2.502713  | 27.504404 |
| 6 | 0.939337  | 4.060596  | 27.504406 |
| 6 | -0.501035 | 4.137609  | 27.504404 |
| 6 | -4.061816 | 0.940556  | 26.250847 |
| 6 | -4.138932 | -0.502120 | 26.250848 |
| 6 | -2.845453 | -3.047358 | 26.250847 |
| 6 | -1.634617 | -3.835480 | 26.250848 |
| 6 | 1.216363  | -3.987914 | 26.250847 |
| 6 | 2.504315  | -3.333360 | 26.250848 |
| 6 | 4.061816  | -0.940556 | 26.250847 |
| 6 | 4.138932  | 0.502120  | 26.250848 |
| 6 | 2.845453  | 3.047358  | 26.250847 |
| 6 | 1.634617  | 3.835480  | 26.250848 |
| 6 | -1.216363 | 3.987914  | 26.250847 |
| 6 | -2.504315 | 3.333360  | 26.250848 |
| 6 | -3.991744 | -1.215526 | 25.003208 |
| 6 | -3.334992 | -2.507914 | 25.003208 |
| 6 | -0.943195 | -4.064715 | 25.003208 |
| 6 | 0.504421  | -4.142145 | 25.003208 |
| 6 | 3.048549  | -2.849189 | 25.003208 |
| 6 | 3.839414  | -1.634231 | 25.003208 |
| 6 | 3.991744  | 1.215526  | 25.003208 |
| 6 | 3.334992  | 2.507914  | 25.003208 |
| 6 | 0.943195  | 4.064715  | 25.003208 |
| 6 | -0.504421 | 4.142145  | 25.003208 |
| 6 | -3.048549 | 2.849189  | 25.003208 |
| 6 | -3.839414 | 1.634231  | 25.003208 |
| 6 | -2.844351 | -3.047084 | 23.754166 |
| 6 | -1.634817 | -3.834380 | 23.754164 |
| 6 | 1.216677  | -3.986822 | 23.754166 |
| 6 | 2.503262  | -3.332983 | 23.754164 |
| 6 | 4.061028  | -0.939738 | 23.754166 |



|   |           |           |           |
|---|-----------|-----------|-----------|
| 6 | 4.138079  | 0.501397  | 23.754164 |
| 6 | 2.844351  | 3.047084  | 23.754166 |
| 6 | 1.634817  | 3.834380  | 23.754164 |
| 6 | -1.216677 | 3.986822  | 23.754166 |
| 6 | -2.503262 | 3.332983  | 23.754164 |
| 6 | -4.061028 | 0.939738  | 23.754166 |
| 6 | -4.138079 | -0.501397 | 23.754164 |
| 6 | -0.940210 | -4.061460 | 22.500674 |
| 6 | 0.501821  | -4.138541 | 22.500676 |
| 6 | 3.047223  | -2.844976 | 22.500674 |
| 6 | 3.834992  | -1.634681 | 22.500676 |
| 6 | 3.987433  | 1.216485  | 22.500674 |
| 6 | 3.333171  | 2.503860  | 22.500676 |
| 6 | 0.940210  | 4.061460  | 22.500674 |
| 6 | -0.501821 | 4.138541  | 22.500676 |
| 6 | -3.047223 | 2.844976  | 22.500674 |
| 6 | -3.834992 | 1.634681  | 22.500676 |
| 6 | -3.987433 | -1.216485 | 22.500674 |
| 6 | -3.333171 | -2.503860 | 22.500676 |
| 6 | 1.215548  | -3.991642 | 21.252397 |
| 6 | 2.507824  | -3.334946 | 21.252397 |
| 6 | 4.064638  | -0.943125 | 21.252397 |
| 6 | 4.142060  | 0.504366  | 21.252397 |
| 6 | 2.849089  | 3.048517  | 21.252397 |
| 6 | 1.634236  | 3.839312  | 21.252397 |
| 6 | -1.215548 | 3.991642  | 21.252397 |
| 6 | -2.507824 | 3.334946  | 21.252397 |
| 6 | -4.064638 | 0.943125  | 21.252397 |
| 6 | -4.142060 | -0.504366 | 21.252397 |
| 6 | -2.849089 | -3.048517 | 21.252397 |
| 6 | -1.634236 | -3.839312 | 21.252397 |
| 6 | 3.047248  | -2.844889 | 20.003874 |
| 6 | 3.834941  | -1.634744 | 20.003872 |
| 6 | 3.987370  | 1.216550  | 20.003874 |
| 6 | 3.333201  | 2.503784  | 20.003872 |
| 6 | 0.940122  | 4.061439  | 20.003874 |
| 6 | -0.501740 | 4.138528  | 20.003872 |
| 6 | -3.047248 | 2.844889  | 20.003874 |
| 6 | -3.834941 | 1.634744  | 20.003872 |
| 6 | -3.987370 | -1.216550 | 20.003874 |
| 6 | -3.333201 | -2.503784 | 20.003872 |
| 6 | -0.940122 | -4.061439 | 20.003874 |
| 6 | 0.501740  | -4.138528 | 20.003872 |
| 6 | 4.061161  | -0.939920 | 18.750519 |
| 6 | 4.138211  | 0.501569  | 18.750520 |
| 6 | 2.844575  | 3.047109  | 18.750519 |
| 6 | 1.634734  | 3.834581  | 18.750520 |
| 6 | -1.216586 | 3.987029  | 18.750519 |
| 6 | -2.503477 | 3.333011  | 18.750520 |
| 6 | -4.061161 | 0.939920  | 18.750519 |
| 6 | -4.138211 | -0.501569 | 18.750520 |
| 6 | -2.844575 | -3.047109 | 18.750519 |
| 6 | -1.634734 | -3.834581 | 18.750520 |
| 6 | 1.216586  | -3.987029 | 18.750519 |
| 6 | 2.503477  | -3.333011 | 18.750520 |
| 6 | 3.991484  | 1.215584  | 17.501624 |
| 6 | 3.334879  | 2.507679  | 17.501624 |
| 6 | 0.943015  | 4.064518  | 17.501624 |
| 6 | -0.504274 | 4.141929  | 17.501624 |
| 6 | -3.048468 | 2.848934  | 17.501624 |
| 6 | -3.839153 | 1.634250  | 17.501624 |
| 6 | -3.991484 | -1.215584 | 17.501624 |
| 6 | -3.334879 | -2.507679 | 17.501624 |
| 6 | -0.943015 | -4.064518 | 17.501624 |
| 6 | 0.504274  | -4.141929 | 17.501624 |
| 6 | 3.048468  | -2.848934 | 17.501624 |
| 6 | 3.839153  | -1.634250 | 17.501624 |
| 6 | 2.845413  | 3.047408  | 16.253532 |
| 6 | 1.634675  | 3.835486  | 16.253530 |
| 6 | -1.216426 | 3.987904  | 16.253532 |

|   |           |           |           |
|---|-----------|-----------|-----------|
| 6 | -2.504291 | 3.333413  | 16.253530 |
| 6 | -4.061839 | 0.940496  | 16.253532 |
| 6 | -4.138966 | -0.502073 | 16.253530 |
| 6 | -2.845413 | -3.047408 | 16.253532 |
| 6 | -1.634675 | -3.835486 | 16.253530 |
| 6 | 1.216426  | -3.987904 | 16.253532 |
| 6 | 2.504291  | -3.333413 | 16.253530 |
| 6 | 4.061839  | -0.940496 | 16.253532 |
| 6 | 4.138966  | 0.502073  | 16.253530 |
| 6 | 0.939681  | 4.060915  | 15.000382 |
| 6 | -0.501362 | 4.137941  | 15.000384 |
| 6 | -3.047015 | 2.844245  | 15.000382 |
| 6 | -3.834243 | 1.634778  | 15.000384 |
| 6 | -3.986696 | -1.216670 | 15.000382 |
| 6 | -3.332881 | -2.503163 | 15.000384 |
| 6 | -0.939681 | -4.060915 | 15.000382 |
| 6 | 0.501362  | -4.137941 | 15.000384 |
| 6 | 3.047015  | -2.844245 | 15.000382 |
| 6 | 3.834243  | -1.634778 | 15.000384 |
| 6 | 3.986696  | 1.216670  | 15.000382 |
| 6 | 3.332881  | 2.503163  | 15.000384 |
| 6 | -1.215633 | 3.991267  | 13.750885 |
| 6 | -2.507477 | 3.334789  | 13.750885 |
| 6 | -4.064355 | 0.942864  | 13.750885 |
| 6 | -4.141750 | -0.504145 | 13.750885 |
| 6 | -2.848722 | -3.048403 | 13.750885 |
| 6 | -1.634273 | -3.838933 | 13.750885 |
| 6 | 1.215633  | -3.991267 | 13.750885 |
| 6 | 2.507477  | -3.334789 | 13.750885 |
| 6 | 4.064355  | -0.942864 | 13.750885 |
| 6 | 4.141750  | 0.504145  | 13.750885 |
| 6 | 2.848722  | 3.048403  | 13.750885 |
| 6 | 1.634273  | 3.838933  | 13.750885 |
| 6 | -3.047565 | 2.845926  | 12.503141 |
| 6 | -3.836021 | 1.634607  | 12.503139 |
| 6 | -3.988427 | -1.216306 | 12.503141 |
| 6 | -3.333622 | -2.504788 | 12.503139 |
| 6 | -0.940862 | -4.062232 | 12.503141 |
| 6 | 0.502399  | -4.139395 | 12.503139 |
| 6 | 3.047565  | -2.845926 | 12.503141 |
| 6 | 3.836021  | -1.634607 | 12.503139 |
| 6 | 3.988427  | 1.216306  | 12.503141 |
| 6 | 3.333622  | 2.504788  | 12.503139 |
| 6 | 0.940862  | 4.062232  | 12.503141 |
| 6 | -0.502399 | 4.139395  | 12.503139 |
| 6 | -4.060722 | 0.939493  | 11.250265 |
| 6 | -4.137728 | -0.501200 | 11.250267 |
| 6 | -2.843986 | -3.046942 | 11.250265 |
| 6 | -1.634812 | -3.833978 | 11.250267 |
| 6 | 1.216736  | -3.986435 | 11.250265 |
| 6 | 2.502916  | -3.332778 | 11.250267 |
| 6 | 4.060722  | -0.939493 | 11.250265 |
| 6 | 4.137728  | 0.501200  | 11.250267 |
| 6 | 2.843986  | 3.046942  | 11.250265 |
| 6 | 1.634812  | 3.833978  | 11.250267 |
| 6 | -1.216736 | 3.986435  | 11.250265 |
| 6 | -2.502916 | 3.332778  | 11.250267 |
| 6 | -3.990992 | -1.215698 | 10.000183 |
| 6 | -3.334676 | -2.507221 | 10.000183 |
| 6 | -0.942671 | -4.064150 | 10.000183 |
| 6 | 0.503979  | -4.141525 | 10.000183 |
| 6 | 3.048321  | -2.848452 | 10.000183 |
| 6 | 3.838655  | -1.634304 | 10.000183 |
| 6 | 3.990992  | 1.215698  | 10.000183 |
| 6 | 3.334676  | 2.507221  | 10.000183 |
| 6 | 0.942671  | 4.064150  | 10.000183 |
| 6 | -0.503979 | 4.141525  | 10.000183 |
| 6 | -3.048321 | 2.848452  | 10.000183 |
| 6 | -3.838655 | 1.634304  | 10.000183 |
| 6 | -2.846425 | -3.047718 | 8.752701  |

|   |           |           |          |
|---|-----------|-----------|----------|
| 6 | -1.634542 | -3.836540 | 8.752699 |
| 6 | 1.216189  | -3.988935 | 8.752701 |
| 6 | 2.505271  | -3.333825 | 8.752699 |
| 6 | 4.062614  | -0.941217 | 8.752701 |
| 6 | 4.139812  | 0.502715  | 8.752699 |
| 6 | 2.846425  | 3.047718  | 8.752701 |
| 6 | 1.634542  | 3.836540  | 8.752699 |
| 6 | -1.216189 | 3.988935  | 8.752701 |
| 6 | -2.505271 | 3.333825  | 8.752699 |
| 6 | -4.062614 | 0.941217  | 8.752701 |
| 6 | -4.139812 | -0.502715 | 8.752699 |
| 6 | -0.939357 | -4.060584 | 7.500165 |
| 6 | 0.501084  | -4.137575 | 7.500167 |
| 6 | 3.046890  | -2.843799 | 7.500165 |
| 6 | 3.833787  | -1.634837 | 7.500167 |
| 6 | 3.986247  | 1.216785  | 7.500165 |
| 6 | 3.332704  | 2.502739  | 7.500167 |
| 6 | 0.939357  | 4.060584  | 7.500165 |
| 6 | -0.501084 | 4.137575  | 7.500167 |
| 6 | -3.046890 | 2.843799  | 7.500165 |
| 6 | -3.833787 | 1.634837  | 7.500167 |
| 6 | -3.986247 | -1.216785 | 7.500165 |
| 6 | -3.332704 | -2.502739 | 7.500167 |
| 6 | 1.215776  | -3.990663 | 6.249519 |
| 6 | 2.506913  | -3.334542 | 6.249519 |
| 6 | 4.063903  | -0.942439 | 6.249519 |
| 6 | 4.141255  | 0.503779  | 6.249519 |
| 6 | 2.848127  | 3.048224  | 6.249519 |
| 6 | 1.634342  | 3.838321  | 6.249519 |
| 6 | -1.215776 | 3.990663  | 6.249519 |
| 6 | -2.506913 | 3.334542  | 6.249519 |
| 6 | -4.063903 | 0.942439  | 6.249519 |
| 6 | -4.141255 | -0.503779 | 6.249519 |
| 6 | -2.848127 | -3.048224 | 6.249519 |
| 6 | -1.634342 | -3.838321 | 6.249519 |
| 6 | 3.047866  | -2.846902 | 5.002214 |
| 6 | 3.837038  | -1.634479 | 5.002212 |
| 6 | 3.989423  | 1.216079  | 5.002214 |
| 6 | 3.334019  | 2.505734  | 5.002212 |
| 6 | 0.941556  | 4.062981  | 5.002214 |
| 6 | -0.503019 | 4.140212  | 5.002212 |
| 6 | -3.047866 | 2.846902  | 5.002214 |
| 6 | -3.837038 | 1.634479  | 5.002212 |
| 6 | -3.989423 | -1.216079 | 5.002214 |
| 6 | -3.334019 | -2.505734 | 5.002212 |
| 6 | -0.941556 | -4.062981 | 5.002214 |
| 6 | 0.503019  | -4.140212 | 5.002212 |
| 6 | 4.060500  | -0.939273 | 3.750078 |
| 6 | 4.137483  | 0.501015  | 3.750080 |
| 6 | 2.843684  | 3.046860  | 3.750078 |
| 6 | 1.634850  | 3.833673  | 3.750080 |
| 6 | -1.216816 | 3.986133  | 3.750078 |
| 6 | -2.502634 | 3.332658  | 3.750080 |
| 6 | -4.060500 | 0.939273  | 3.750078 |
| 6 | -4.137483 | -0.501015 | 3.750080 |
| 6 | -2.843684 | -3.046860 | 3.750078 |
| 6 | -1.634850 | -3.833673 | 3.750080 |
| 6 | 1.216816  | -3.986133 | 3.750078 |
| 6 | 2.502634  | -3.332658 | 3.750080 |
| 6 | 3.990282  | 1.215866  | 2.498897 |
| 6 | 3.334387  | 2.506558  | 2.498897 |
| 6 | 0.942170  | 4.063619  | 2.498897 |
| 6 | -0.503549 | 4.140943  | 2.498897 |
| 6 | -3.048112 | 2.847753  | 2.498897 |
| 6 | -3.837937 | 1.634385  | 2.498897 |
| 6 | -3.990282 | -1.215866 | 2.498897 |
| 6 | -3.334387 | -2.506558 | 2.498897 |
| 6 | -0.942170 | -4.063619 | 2.498897 |
| 6 | 0.503549  | -4.140943 | 2.498897 |
| 6 | 3.048112  | -2.847753 | 2.498897 |

|   |           |           |           |
|---|-----------|-----------|-----------|
| 6 | 3.837937  | -1.634385 | 2.498897  |
| 6 | 2.847354  | 3.048011  | 1.251681  |
| 6 | 1.634418  | 3.837504  | 1.251679  |
| 6 | -1.215978 | 3.989886  | 1.251681  |
| 6 | -2.506167 | 3.334199  | 1.251679  |
| 6 | -4.063331 | 0.941875  | 1.251681  |
| 6 | -4.140585 | -0.503305 | 1.251679  |
| 6 | -2.847354 | -3.048011 | 1.251681  |
| 6 | -1.634418 | -3.837504 | 1.251679  |
| 6 | 1.215978  | -3.989886 | 1.251681  |
| 6 | 2.506167  | -3.334199 | 1.251679  |
| 6 | 4.063331  | -0.941875 | 1.251681  |
| 6 | 4.140585  | 0.503305  | 1.251679  |
| 6 | 0.939238  | 4.060462  | 0.000000  |
| 6 | -0.501000 | 4.137473  | 0.000000  |
| 6 | -3.046845 | 2.843635  | 0.000000  |
| 6 | -3.833656 | 1.634858  | 0.000000  |
| 6 | -3.986083 | -1.216827 | 0.000000  |
| 6 | -3.332656 | -2.502615 | 0.000000  |
| 6 | -0.939238 | -4.060462 | 0.000000  |
| 6 | 0.501000  | -4.137473 | 0.000000  |
| 6 | 3.046845  | -2.843635 | 0.000000  |
| 6 | 3.833656  | -1.634858 | 0.000000  |
| 6 | 3.986083  | 1.216827  | 0.000000  |
| 6 | 3.332656  | 2.502615  | 0.000000  |
| 6 | -1.215978 | 3.989886  | -1.251681 |
| 6 | -2.506167 | 3.334199  | -1.251679 |
| 6 | -4.063331 | 0.941875  | -1.251681 |
| 6 | -4.140585 | -0.503305 | -1.251679 |
| 6 | -2.847354 | -3.048011 | -1.251681 |
| 6 | -1.634418 | -3.837504 | -1.251679 |
| 6 | 1.215978  | -3.989886 | -1.251681 |
| 6 | 2.506167  | -3.334199 | -1.251679 |
| 6 | 4.063331  | -0.941875 | -1.251681 |
| 6 | 4.140585  | 0.503305  | -1.251679 |
| 6 | 2.847354  | 3.048011  | -1.251681 |
| 6 | 1.634418  | 3.837504  | -1.251679 |
| 6 | -3.048112 | 2.847753  | -2.498897 |
| 6 | -3.837937 | 1.634385  | -2.498897 |
| 6 | -3.990282 | -1.215866 | -2.498897 |
| 6 | -3.334387 | -2.506558 | -2.498897 |
| 6 | -0.942170 | -4.063619 | -2.498897 |
| 6 | 0.503549  | -4.140943 | -2.498897 |
| 6 | 3.048112  | -2.847753 | -2.498897 |
| 6 | 3.837937  | -1.634385 | -2.498897 |
| 6 | 3.990282  | 1.215866  | -2.498897 |
| 6 | 3.334387  | 2.506558  | -2.498897 |
| 6 | 0.942170  | 4.063619  | -2.498897 |
| 6 | -0.503549 | 4.140943  | -2.498897 |
| 6 | -4.060500 | 0.939273  | -3.750078 |
| 6 | -4.137483 | -0.501015 | -3.750080 |
| 6 | -2.843684 | -3.046860 | -3.750078 |
| 6 | -1.634850 | -3.833673 | -3.750080 |
| 6 | 1.216816  | -3.986133 | -3.750078 |
| 6 | 2.502634  | -3.332658 | -3.750080 |
| 6 | 4.060500  | -0.939273 | -3.750078 |
| 6 | 4.137483  | 0.501015  | -3.750080 |
| 6 | 2.843684  | 3.046860  | -3.750078 |
| 6 | 1.634850  | 3.833673  | -3.750080 |
| 6 | -1.216816 | 3.986133  | -3.750078 |
| 6 | -2.502634 | 3.332658  | -3.750080 |
| 6 | -3.989423 | -1.216079 | -5.002214 |
| 6 | -3.334019 | -2.505734 | -5.002212 |
| 6 | -0.941556 | -4.062981 | -5.002214 |
| 6 | 0.503019  | -4.140212 | -5.002212 |
| 6 | 3.047866  | -2.846902 | -5.002214 |
| 6 | 3.837038  | -1.634479 | -5.002212 |
| 6 | 3.989423  | 1.216079  | -5.002214 |
| 6 | 3.334019  | 2.505734  | -5.002212 |
| 6 | 0.941556  | 4.062981  | -5.002214 |

|   |           |           |            |
|---|-----------|-----------|------------|
| 6 | -0.503019 | 4.140212  | -5.002212  |
| 6 | -3.047866 | 2.846902  | -5.002214  |
| 6 | -3.837038 | 1.634479  | -5.002212  |
| 6 | -2.848127 | -3.048224 | -6.249519  |
| 6 | -1.634342 | -3.838321 | -6.249519  |
| 6 | 1.215776  | -3.990663 | -6.249519  |
| 6 | 2.506913  | -3.334542 | -6.249519  |
| 6 | 4.063903  | -0.942439 | -6.249519  |
| 6 | 4.141255  | 0.503779  | -6.249519  |
| 6 | 2.848127  | 3.048224  | -6.249519  |
| 6 | 1.634342  | 3.838321  | -6.249519  |
| 6 | -1.215776 | 3.990663  | -6.249519  |
| 6 | -2.506913 | 3.334542  | -6.249519  |
| 6 | -4.063903 | 0.942439  | -6.249519  |
| 6 | -4.141255 | -0.503779 | -6.249519  |
| 6 | -0.939357 | -4.060584 | -7.500165  |
| 6 | 0.501084  | -4.137575 | -7.500167  |
| 6 | 3.046890  | -2.843799 | -7.500165  |
| 6 | 3.833787  | -1.634837 | -7.500167  |
| 6 | 3.986247  | 1.216785  | -7.500165  |
| 6 | 3.332704  | 2.502739  | -7.500167  |
| 6 | 0.939357  | 4.060584  | -7.500165  |
| 6 | -0.501084 | 4.137575  | -7.500167  |
| 6 | -3.046890 | 2.843799  | -7.500165  |
| 6 | -3.833787 | 1.634837  | -7.500167  |
| 6 | -3.986247 | -1.216785 | -7.500165  |
| 6 | -3.332704 | -2.502739 | -7.500167  |
| 6 | 1.216189  | -3.988935 | -8.752701  |
| 6 | 2.505271  | -3.333825 | -8.752699  |
| 6 | 4.062614  | -0.941217 | -8.752701  |
| 6 | 4.139812  | 0.502715  | -8.752699  |
| 6 | 2.846425  | 3.047718  | -8.752701  |
| 6 | 1.634542  | 3.836540  | -8.752699  |
| 6 | -1.216189 | 3.988935  | -8.752701  |
| 6 | -2.505271 | 3.333825  | -8.752699  |
| 6 | -4.062614 | 0.941217  | -8.752701  |
| 6 | -4.139812 | -0.502715 | -8.752699  |
| 6 | -2.846425 | -3.047718 | -8.752701  |
| 6 | -1.634542 | -3.836540 | -8.752699  |
| 6 | 3.048321  | -2.848452 | -10.000183 |
| 6 | 3.838655  | -1.634304 | -10.000183 |
| 6 | 3.990992  | 1.215698  | -10.000183 |
| 6 | 3.334676  | 2.507221  | -10.000183 |
| 6 | 0.942671  | 4.064150  | -10.000183 |
| 6 | -0.503979 | 4.141525  | -10.000183 |
| 6 | -3.048321 | 2.848452  | -10.000183 |
| 6 | -3.838655 | 1.634304  | -10.000183 |
| 6 | -3.990992 | -1.215698 | -10.000183 |
| 6 | -3.334676 | -2.507221 | -10.000183 |
| 6 | -0.942671 | -4.064150 | -10.000183 |
| 6 | 0.503979  | -4.141525 | -10.000183 |
| 6 | 4.060722  | -0.939493 | -11.250265 |
| 6 | 4.137728  | 0.501200  | -11.250267 |
| 6 | 2.843986  | 3.046942  | -11.250265 |
| 6 | 1.634812  | 3.833978  | -11.250267 |
| 6 | -1.216736 | 3.986435  | -11.250265 |
| 6 | -2.502916 | 3.332778  | -11.250267 |
| 6 | -4.060722 | 0.939493  | -11.250265 |
| 6 | -4.137728 | -0.501200 | -11.250267 |
| 6 | -2.843986 | -3.046942 | -11.250265 |
| 6 | -1.634812 | -3.833978 | -11.250267 |
| 6 | 1.216736  | -3.986435 | -11.250265 |
| 6 | 2.502916  | -3.332778 | -11.250267 |
| 6 | 3.988427  | 1.216306  | -12.503141 |
| 6 | 3.333622  | 2.504788  | -12.503139 |
| 6 | 0.940862  | 4.062232  | -12.503141 |
| 6 | -0.502399 | 4.139395  | -12.503139 |
| 6 | -3.047565 | 2.845926  | -12.503141 |
| 6 | -3.836021 | 1.634607  | -12.503139 |
| 6 | -3.988427 | -1.216306 | -12.503141 |

|   |           |           |            |
|---|-----------|-----------|------------|
| 6 | -3.333622 | -2.504788 | -12.503139 |
| 6 | -0.940862 | -4.062232 | -12.503141 |
| 6 | 0.502399  | -4.139395 | -12.503139 |
| 6 | 3.047565  | -2.845926 | -12.503141 |
| 6 | 3.836021  | -1.634607 | -12.503139 |
| 6 | 2.848722  | 3.048403  | -13.750885 |
| 6 | 1.634273  | 3.838933  | -13.750885 |
| 6 | -1.215633 | 3.991267  | -13.750885 |
| 6 | -2.507477 | 3.334789  | -13.750885 |
| 6 | -4.064355 | 0.942864  | -13.750885 |
| 6 | -4.141750 | -0.504145 | -13.750885 |
| 6 | -2.848722 | -3.048403 | -13.750885 |
| 6 | -1.634273 | -3.838933 | -13.750885 |
| 6 | 1.215633  | -3.991267 | -13.750885 |
| 6 | 2.507477  | -3.334789 | -13.750885 |
| 6 | 4.064355  | -0.942864 | -13.750885 |
| 6 | 4.141750  | 0.504145  | -13.750885 |
| 6 | 0.939681  | 4.060915  | -15.000382 |
| 6 | -0.501362 | 4.137941  | -15.000384 |
| 6 | -3.047015 | 2.844245  | -15.000382 |
| 6 | -3.834243 | 1.634778  | -15.000384 |
| 6 | -3.986696 | -1.216670 | -15.000382 |
| 6 | -3.332881 | -2.503163 | -15.000384 |
| 6 | -0.939681 | -4.060915 | -15.000382 |
| 6 | 0.501362  | -4.137941 | -15.000384 |
| 6 | 3.047015  | -2.844245 | -15.000382 |
| 6 | 3.834243  | -1.634778 | -15.000384 |
| 6 | 3.986696  | 1.216670  | -15.000382 |
| 6 | 3.332881  | 2.503163  | -15.000384 |
| 6 | -1.216426 | 3.987904  | -16.253532 |
| 6 | -2.504291 | 3.333413  | -16.253530 |
| 6 | -4.061839 | 0.940496  | -16.253532 |
| 6 | -4.138966 | -0.502073 | -16.253530 |
| 6 | -2.845413 | -3.047408 | -16.253532 |
| 6 | -1.634675 | -3.835486 | -16.253530 |
| 6 | 1.216426  | -3.987904 | -16.253532 |
| 6 | 2.504291  | -3.333413 | -16.253530 |
| 6 | 4.061839  | -0.940496 | -16.253532 |
| 6 | 4.138966  | 0.502073  | -16.253530 |
| 6 | 2.845413  | 3.047408  | -16.253532 |
| 6 | 1.634675  | 3.835486  | -16.253530 |
| 6 | -3.048468 | 2.848934  | -17.501624 |
| 6 | -3.839153 | 1.634250  | -17.501624 |
| 6 | -3.991484 | -1.215584 | -17.501624 |
| 6 | -3.334879 | -2.507679 | -17.501624 |
| 6 | -0.943015 | -4.064518 | -17.501624 |
| 6 | 0.504274  | -4.141929 | -17.501624 |
| 6 | 3.048468  | -2.848934 | -17.501624 |
| 6 | 3.839153  | -1.634250 | -17.501624 |
| 6 | 3.991484  | 1.215584  | -17.501624 |
| 6 | 3.334879  | 2.507679  | -17.501624 |
| 6 | 0.943015  | 4.064518  | -17.501624 |
| 6 | -0.504274 | 4.141929  | -17.501624 |
| 6 | -4.061161 | 0.939920  | -18.750519 |
| 6 | -4.138211 | -0.501569 | -18.750520 |
| 6 | -2.844575 | -3.047109 | -18.750519 |
| 6 | -1.634734 | -3.834581 | -18.750520 |
| 6 | 1.216586  | -3.987029 | -18.750519 |
| 6 | 2.503477  | -3.333011 | -18.750520 |
| 6 | 4.061161  | -0.939920 | -18.750519 |
| 6 | 4.138211  | 0.501569  | -18.750520 |
| 6 | 2.844575  | 3.047109  | -18.750519 |
| 6 | 1.634734  | 3.834581  | -18.750520 |
| 6 | -1.216586 | 3.987029  | -18.750519 |
| 6 | -2.503477 | 3.333011  | -18.750520 |
| 6 | -3.987370 | -1.216550 | -20.003874 |
| 6 | -3.333201 | -2.503784 | -20.003872 |
| 6 | -0.940122 | -4.061439 | -20.003874 |
| 6 | 0.501740  | -4.138528 | -20.003872 |
| 6 | 3.047248  | -2.844889 | -20.003874 |

|   |           |           |            |
|---|-----------|-----------|------------|
| 6 | 3.834941  | -1.634744 | -20.003872 |
| 6 | 3.987370  | 1.216550  | -20.003874 |
| 6 | 3.333201  | 2.503784  | -20.003872 |
| 6 | 0.940122  | 4.061439  | -20.003874 |
| 6 | -0.501740 | 4.138528  | -20.003872 |
| 6 | -3.047248 | 2.844889  | -20.003874 |
| 6 | -3.834941 | 1.634744  | -20.003872 |
| 6 | -2.849089 | -3.048517 | -21.252397 |
| 6 | -1.634236 | -3.839312 | -21.252397 |
| 6 | 1.215548  | -3.991642 | -21.252397 |
| 6 | 2.507824  | -3.334946 | -21.252397 |
| 6 | 4.064638  | -0.943125 | -21.252397 |
| 6 | 4.142060  | 0.504366  | -21.252397 |
| 6 | 2.849089  | 3.048517  | -21.252397 |
| 6 | 1.634236  | 3.839312  | -21.252397 |
| 6 | -1.215548 | 3.991642  | -21.252397 |
| 6 | -2.507824 | 3.334946  | -21.252397 |
| 6 | -4.064638 | 0.943125  | -21.252397 |
| 6 | -4.142060 | -0.504366 | -21.252397 |
| 6 | -0.940210 | -4.061460 | -22.500674 |
| 6 | 0.501821  | -4.138541 | -22.500676 |
| 6 | 3.047223  | -2.844976 | -22.500674 |
| 6 | 3.834992  | -1.634681 | -22.500676 |
| 6 | 3.987433  | 1.216485  | -22.500674 |
| 6 | 3.333171  | 2.503860  | -22.500676 |
| 6 | 0.940210  | 4.061460  | -22.500674 |
| 6 | -0.501821 | 4.138541  | -22.500676 |
| 6 | -3.047223 | 2.844976  | -22.500674 |
| 6 | -3.834992 | 1.634681  | -22.500676 |
| 6 | -3.987433 | -1.216485 | -22.500674 |
| 6 | -3.333171 | -2.503860 | -22.500676 |
| 6 | 1.216677  | -3.986822 | -23.754166 |
| 6 | 2.503262  | -3.332983 | -23.754164 |
| 6 | 4.061028  | -0.939738 | -23.754166 |
| 6 | 4.138079  | 0.501397  | -23.754164 |
| 6 | 2.844351  | 3.047084  | -23.754166 |
| 6 | 1.634817  | 3.834380  | -23.754164 |
| 6 | -1.216677 | 3.986822  | -23.754166 |
| 6 | -2.503262 | 3.332983  | -23.754164 |
| 6 | -4.061028 | 0.939738  | -23.754166 |
| 6 | -4.138079 | -0.501397 | -23.754164 |
| 6 | -2.844351 | -3.047084 | -23.754166 |
| 6 | -1.634817 | -3.834380 | -23.754164 |
| 6 | 3.048549  | -2.849189 | -25.003208 |
| 6 | 3.839414  | -1.634231 | -25.003208 |
| 6 | 3.991744  | 1.215526  | -25.003208 |
| 6 | 3.334992  | 2.507914  | -25.003208 |
| 6 | 0.943195  | 4.064715  | -25.003208 |
| 6 | -0.504421 | 4.142145  | -25.003208 |
| 6 | -3.048549 | 2.849189  | -25.003208 |
| 6 | -3.839414 | 1.634231  | -25.003208 |
| 6 | -3.991744 | -1.215526 | -25.003208 |
| 6 | -3.334992 | -2.507914 | -25.003208 |
| 6 | -0.943195 | -4.064715 | -25.003208 |
| 6 | 0.504421  | -4.142145 | -25.003208 |
| 6 | 4.061816  | -0.940556 | -26.250847 |
| 6 | 4.138932  | 0.502120  | -26.250848 |
| 6 | 2.845453  | 3.047358  | -26.250847 |
| 6 | 1.634617  | 3.835480  | -26.250848 |
| 6 | -1.216363 | 3.987914  | -26.250847 |
| 6 | -2.504315 | 3.333360  | -26.250848 |
| 6 | -4.061816 | 0.940556  | -26.250847 |
| 6 | -4.138932 | -0.502120 | -26.250848 |
| 6 | -2.845453 | -3.047358 | -26.250847 |
| 6 | -1.634617 | -3.835480 | -26.250848 |
| 6 | 1.216363  | -3.987914 | -26.250847 |
| 6 | 2.504315  | -3.333360 | -26.250848 |
| 6 | 3.986248  | 1.216809  | -27.504406 |
| 6 | 3.332757  | 2.502713  | -27.504404 |
| 6 | 0.939337  | 4.060596  | -27.504406 |

|   |           |           |            |
|---|-----------|-----------|------------|
| 6 | -0.501035 | 4.137609  | -27.504404 |
| 6 | -3.046911 | 2.843788  | -27.504406 |
| 6 | -3.833791 | 1.634895  | -27.504404 |
| 6 | -3.986248 | -1.216809 | -27.504406 |
| 6 | -3.332757 | -2.502713 | -27.504404 |
| 6 | -0.939337 | -4.060596 | -27.504406 |
| 6 | 0.501035  | -4.137609 | -27.504404 |
| 6 | 3.046911  | -2.843788 | -27.504406 |
| 6 | 3.833791  | -1.634895 | -27.504404 |
| 6 | 2.849237  | 3.048566  | -28.754074 |
| 6 | 1.634236  | 3.839461  | -28.754074 |
| 6 | -1.215517 | 3.991795  | -28.754074 |
| 6 | -2.507953 | 3.335021  | -28.754074 |
| 6 | -4.064754 | 0.943229  | -28.754074 |
| 6 | -4.142189 | -0.504441 | -28.754074 |
| 6 | -2.849237 | -3.048566 | -28.754074 |
| 6 | -1.634236 | -3.839461 | -28.754074 |
| 6 | 1.215517  | -3.991795 | -28.754074 |
| 6 | 2.507953  | -3.335021 | -28.754074 |
| 6 | 4.064754  | -0.943229 | -28.754074 |
| 6 | 4.142189  | 0.504441  | -28.754074 |
| 6 | 0.940974  | 4.062241  | -30.001030 |
| 6 | -0.502479 | 4.139401  | -30.001032 |
| 6 | -3.047517 | 2.846027  | -30.001030 |
| 6 | -3.836066 | 1.634541  | -30.001032 |
| 6 | -3.988491 | -1.216213 | -30.001030 |
| 6 | -3.333587 | -2.504860 | -30.001032 |
| 6 | -0.940974 | -4.062241 | -30.001030 |
| 6 | 0.502479  | -4.139401 | -30.001032 |
| 6 | 3.047517  | -2.846027 | -30.001030 |
| 6 | 3.836066  | -1.634541 | -30.001032 |
| 6 | 3.988491  | 1.216213  | -30.001030 |
| 6 | 3.333587  | 2.504860  | -30.001032 |
| 6 | -1.216952 | 3.985599  | -31.254586 |
| 6 | -2.502095 | 3.332497  | -31.254584 |
| 6 | -4.060106 | 0.938889  | -31.254586 |
| 6 | -4.137075 | -0.500629 | -31.254584 |
| 6 | -2.843154 | -3.046711 | -31.254586 |
| 6 | -1.634980 | -3.833126 | -31.254584 |
| 6 | 1.216952  | -3.985599 | -31.254586 |
| 6 | 2.502095  | -3.332497 | -31.254584 |
| 6 | 4.060106  | -0.938889 | -31.254586 |
| 6 | 4.137075  | 0.500629  | -31.254584 |
| 6 | 2.843154  | 3.046711  | -31.254586 |
| 6 | 1.634980  | 3.833126  | -31.254584 |
| 6 | -3.048541 | 2.849221  | -32.505039 |
| 6 | -3.839431 | 1.634234  | -32.505039 |
| 6 | -3.991768 | -1.215504 | -32.505039 |
| 6 | -3.335004 | -2.507927 | -32.505039 |
| 6 | -0.943227 | -4.064725 | -32.505039 |
| 6 | 0.504427  | -4.142161 | -32.505039 |
| 6 | 3.048541  | -2.849221 | -32.505039 |
| 6 | 3.839431  | -1.634234 | -32.505039 |
| 6 | 3.991768  | 1.215504  | -32.505039 |
| 6 | 3.335004  | 2.507927  | -32.505039 |
| 6 | 0.943227  | 4.064725  | -32.505039 |
| 6 | -0.504427 | 4.142161  | -32.505039 |
| 6 | -4.062732 | 0.941501  | -33.751219 |
| 6 | -4.139948 | -0.502935 | -33.751220 |
| 6 | -2.846730 | -3.047678 | -33.751219 |
| 6 | -1.634420 | -3.836767 | -33.751220 |
| 6 | 1.216002  | -3.989180 | -33.751219 |
| 6 | 2.505528  | -3.333832 | -33.751220 |
| 6 | 4.062732  | -0.941501 | -33.751219 |
| 6 | 4.139948  | 0.502935  | -33.751220 |
| 6 | 2.846730  | 3.047678  | -33.751219 |
| 6 | 1.634420  | 3.836767  | -33.751220 |
| 6 | -1.216002 | 3.989180  | -33.751219 |
| 6 | -2.505528 | 3.333832  | -33.751220 |
| 6 | -3.984795 | -1.217135 | -35.004686 |



|   |           |           |            |
|---|-----------|-----------|------------|
| 6 | -3.332182 | -2.501322 | -35.004683 |
| 6 | -0.938327 | -4.059501 | -35.004686 |
| 6 | 0.500117  | -4.136415 | -35.004683 |
| 6 | 3.046468  | -2.842366 | -35.004686 |
| 6 | 3.832299  | -1.635094 | -35.004683 |
| 6 | 3.984795  | 1.217135  | -35.004686 |
| 6 | 3.332182  | 2.501322  | -35.004683 |
| 6 | 0.938327  | 4.059501  | -35.004686 |
| 6 | -0.500117 | 4.136415  | -35.004683 |
| 6 | -3.046468 | 2.842366  | -35.004686 |
| 6 | -3.832299 | 1.635094  | -35.004683 |
| 6 | -2.849345 | -3.048678 | -36.256250 |
| 6 | -1.634328 | -3.839591 | -36.256249 |
| 6 | 1.215560  | -3.991944 | -36.256250 |
| 6 | 2.508020  | -3.335165 | -36.256249 |
| 6 | 4.064905  | -0.943266 | -36.256250 |
| 6 | 4.142347  | 0.504426  | -36.256249 |
| 6 | 2.849345  | 3.048678  | -36.256250 |
| 6 | 1.634328  | 3.839591  | -36.256249 |
| 6 | -1.215560 | 3.991944  | -36.256250 |
| 6 | -2.508020 | 3.335165  | -36.256249 |
| 6 | -4.064905 | 0.943266  | -36.256250 |
| 6 | -4.142347 | -0.504426 | -36.256249 |
| 6 | -0.942403 | -4.064118 | -37.501365 |
| 6 | 0.503662  | -4.141425 | -37.501366 |
| 6 | 3.048427  | -2.848204 | -37.501365 |
| 6 | 3.838410  | -1.634528 | -37.501366 |
| 6 | 3.990831  | 1.215913  | -37.501365 |
| 6 | 3.334748  | 2.506897  | -37.501366 |
| 6 | 0.942403  | 4.064118  | -37.501365 |
| 6 | -0.503662 | 4.141425  | -37.501366 |
| 6 | -3.048427 | 2.848204  | -37.501365 |
| 6 | -3.838410 | 1.634528  | -37.501366 |
| 6 | -3.990831 | -1.215913 | -37.501365 |
| 6 | -3.334748 | -2.506897 | -37.501366 |
| 6 | 1.217742  | -3.984125 | -38.754473 |
| 6 | 2.500403  | -3.332291 | -38.754469 |
| 6 | 4.059224  | -0.937467 | -38.754473 |
| 6 | 4.136051  | 0.499267  | -38.754469 |
| 6 | 2.841483  | 3.046657  | -38.754473 |
| 6 | 1.635647  | 3.831559  | -38.754469 |
| 6 | -1.217742 | 3.984125  | -38.754473 |
| 6 | -2.500403 | 3.332291  | -38.754469 |
| 6 | -4.059224 | 0.937467  | -38.754473 |
| 6 | -4.136051 | -0.499267 | -38.754469 |
| 6 | -2.841483 | -3.046657 | -38.754473 |
| 6 | -1.635647 | -3.831559 | -38.754469 |
| 6 | 3.047885  | -2.848591 | -40.007936 |
| 6 | 3.838570  | -1.633933 | -40.007937 |
| 6 | 3.990895  | 1.215250  | -40.007936 |
| 6 | 3.334312  | 2.507333  | -40.007937 |
| 6 | 0.943010  | 4.063841  | -40.007936 |
| 6 | -0.504258 | 4.141265  | -40.007937 |
| 6 | -3.047885 | 2.848591  | -40.007936 |
| 6 | -3.838570 | 1.633933  | -40.007937 |
| 6 | -3.990895 | -1.215250 | -40.007936 |
| 6 | -3.334312 | -2.507333 | -40.007937 |
| 6 | -0.943010 | -4.063841 | -40.007936 |
| 6 | 0.504258  | -4.141265 | -40.007937 |
| 6 | 4.059796  | -0.942757 | -41.251157 |
| 6 | 4.137170  | 0.504445  | -41.251154 |
| 6 | 2.846350  | 3.044508  | -41.251157 |
| 6 | 1.631723  | 3.835117  | -41.251154 |
| 6 | -1.213446 | 3.987265  | -41.251157 |
| 6 | -2.505447 | 3.330672  | -41.251154 |
| 6 | -4.059796 | 0.942757  | -41.251157 |
| 6 | -4.137170 | -0.504445 | -41.251154 |
| 6 | -2.846350 | -3.044508 | -41.251157 |
| 6 | -1.631723 | -3.835117 | -41.251154 |
| 6 | 1.213446  | -3.987265 | -41.251157 |

|   |           |           |            |
|---|-----------|-----------|------------|
| 6 | 2.505447  | -3.330672 | -41.251154 |
| 6 | 3.968339  | 1.214035  | -42.503799 |
| 6 | 3.320013  | 2.489812  | -42.503799 |
| 6 | 0.932784  | 4.043700  | -42.503799 |
| 6 | -0.496234 | 4.120122  | -42.503799 |
| 6 | -3.035555 | 2.829665  | -42.503799 |
| 6 | -3.816247 | 1.630309  | -42.503799 |
| 6 | -3.968339 | -1.214035 | -42.503799 |
| 6 | -3.320013 | -2.489812 | -42.503799 |
| 6 | -0.932784 | -4.043700 | -42.503799 |
| 6 | 0.496234  | -4.120122 | -42.503799 |
| 6 | 3.035555  | -2.829665 | -42.503799 |
| 6 | 3.816247  | -1.630309 | -42.503799 |
| 6 | 2.843822  | 3.038461  | -43.765636 |
| 6 | 1.627274  | 3.830374  | -43.765628 |
| 6 | -1.209474 | 3.982053  | -43.765636 |
| 6 | -2.503564 | 3.324447  | -43.765628 |
| 6 | -4.053296 | 0.943592  | -43.765636 |
| 6 | -4.130838 | -0.505926 | -43.765628 |
| 6 | -2.843822 | -3.038461 | -43.765636 |
| 6 | -1.627274 | -3.830374 | -43.765628 |
| 6 | 1.209474  | -3.982053 | -43.765636 |
| 6 | 2.503564  | -3.324447 | -43.765628 |
| 6 | 4.053296  | -0.943592 | -43.765636 |
| 6 | 4.130838  | 0.505926  | -43.765628 |
| 6 | 0.956105  | 4.103438  | -45.005756 |
| 6 | -0.513036 | 4.182003  | -45.005770 |
| 6 | -3.075629 | 2.879730  | -45.005756 |
| 6 | -3.878239 | 1.646699  | -45.005770 |
| 6 | -4.031734 | -1.223708 | -45.005756 |
| 6 | -3.365203 | -2.535304 | -45.005770 |
| 6 | -0.956105 | -4.103438 | -45.005756 |
| 6 | 0.513036  | -4.182003 | -45.005770 |
| 6 | 3.075629  | -2.879730 | -45.005756 |
| 6 | 3.878239  | -1.646699 | -45.005770 |
| 6 | 4.031734  | 1.223708  | -45.005756 |
| 6 | 3.365203  | 2.535304  | -45.005770 |
| 6 | -1.291424 | 4.069642  | -46.220317 |
| 6 | -2.526020 | 3.442240  | -46.220302 |
| 6 | -4.170126 | 0.916415  | -46.220317 |
| 6 | -4.244077 | -0.466477 | -46.220302 |
| 6 | -2.878702 | -3.153227 | -46.220317 |
| 6 | -1.718057 | -3.908717 | -46.220302 |
| 6 | 1.291424  | -4.069642 | -46.220317 |
| 6 | 2.526020  | -3.442240 | -46.220302 |
| 6 | 4.170126  | -0.916415 | -46.220317 |
| 6 | 4.244077  | 0.466477  | -46.220302 |
| 6 | 2.878702  | 3.153227  | -46.220317 |
| 6 | 1.718057  | 3.908717  | -46.220302 |
| 1 | 3.360227  | 2.913659  | 47.177108  |
| 1 | 1.304072  | 4.252070  | 47.177083  |
| 1 | -0.843189 | 4.366871  | 47.177108  |
| 1 | -3.030364 | 3.255395  | 47.177083  |
| 1 | -4.203416 | 1.453213  | 47.177108  |
| 1 | -4.334436 | -0.996675 | 47.177083  |
| 1 | -3.360227 | -2.913659 | 47.177108  |
| 1 | -1.304072 | -4.252070 | 47.177083  |
| 1 | 0.843189  | -4.366871 | 47.177108  |
| 1 | 3.030364  | -3.255395 | 47.177083  |
| 1 | 4.203416  | -1.453213 | 47.177108  |
| 1 | 4.334436  | 0.996675  | 47.177083  |
| 1 | -0.843189 | 4.366871  | -47.177108 |
| 1 | -3.030364 | 3.255395  | -47.177083 |
| 1 | -4.203416 | 1.453213  | -47.177108 |
| 1 | -4.334436 | -0.996675 | -47.177083 |
| 1 | -3.360227 | -2.913659 | -47.177108 |
| 1 | -1.304072 | -4.252070 | -47.177083 |
| 1 | 0.843189  | -4.366871 | -47.177108 |
| 1 | 3.030364  | -3.255395 | -47.177083 |
| 1 | 4.203416  | -1.453213 | -47.177108 |

|   |          |          |            |
|---|----------|----------|------------|
| 1 | 4.334436 | 0.996675 | -47.177083 |
| 1 | 3.360227 | 2.913659 | -47.177108 |
| 1 | 1.304072 | 4.252070 | -47.177083 |

Nanotube (6,6) u38v0s  
B3LYP/STO-3G Energy: -34348.958317

|   |           |           |            |
|---|-----------|-----------|------------|
| C | -3.467888 | 2.489253  | -46.846992 |
| C | -2.489248 | 3.467893  | -46.846992 |
| C | 0.421745  | 4.247720  | -46.847028 |
| C | 1.758606  | 3.889547  | -46.847026 |
| C | 3.889547  | 1.758606  | -46.847026 |
| C | 4.247720  | 0.421745  | -46.847028 |
| C | 3.467893  | -2.489248 | -46.846992 |
| C | 2.489252  | -3.467888 | -46.846992 |
| C | -0.421740 | -4.247715 | -46.847029 |
| C | -1.758601 | -3.889542 | -46.847027 |
| C | -3.889542 | -1.758601 | -46.847027 |
| C | -4.247715 | -0.421740 | -46.847029 |
| C | -1.783666 | 3.816165  | -45.631371 |
| C | -0.363406 | 4.196667  | -45.631394 |
| C | 2.413069  | 3.452760  | -45.631395 |
| C | 3.452760  | 2.413069  | -45.631395 |
| C | 4.196667  | -0.363406 | -45.631394 |
| C | 3.816165  | -1.783666 | -45.631371 |
| C | 1.783671  | -3.816160 | -45.631371 |
| C | 0.363410  | -4.196662 | -45.631395 |
| C | -2.413064 | -3.452756 | -45.631396 |
| C | -3.452756 | -2.413064 | -45.631396 |
| C | -4.196662 | 0.363410  | -45.631395 |
| C | -3.816160 | 1.783671  | -45.631371 |
| C | 0.359361  | 4.145968  | -44.391516 |
| C | 1.761757  | 3.770201  | -44.391514 |
| C | 3.770201  | 1.761757  | -44.391514 |
| C | 4.145968  | 0.359361  | -44.391516 |
| C | 3.410862  | -2.384238 | -44.391492 |
| C | 2.384243  | -3.410858 | -44.391492 |
| C | -0.359356 | -4.145963 | -44.391517 |
| C | -1.761752 | -3.770197 | -44.391515 |
| C | -3.770197 | -1.761752 | -44.391515 |
| C | -4.145963 | -0.359356 | -44.391517 |
| C | -3.410858 | 2.384243  | -44.391492 |
| C | -2.384238 | 3.410862  | -44.391492 |
| C | 2.384252  | 3.395663  | -43.129904 |
| C | 3.395663  | 2.384252  | -43.129904 |
| C | 4.132835  | -0.366977 | -43.129898 |
| C | 3.762640  | -1.748598 | -43.129889 |
| C | 1.748602  | -3.762636 | -43.129889 |
| C | 0.366981  | -4.132831 | -43.129899 |
| C | -2.384248 | -3.395659 | -43.129905 |
| C | -3.395659 | -2.384248 | -43.129905 |
| C | -4.132831 | 0.366981  | -43.129899 |
| C | -3.762636 | 1.748602  | -43.129889 |
| C | -1.748598 | 3.762640  | -43.129889 |
| C | -0.366977 | 4.132835  | -43.129898 |
| C | 3.776429  | 1.761502  | -41.876623 |
| C | 4.151217  | 0.362712  | -41.876620 |
| C | 3.413735  | -2.389752 | -41.876613 |
| C | 2.389755  | -3.413732 | -41.876613 |
| C | -0.362708 | -4.151213 | -41.876621 |
| C | -1.761498 | -3.776425 | -41.876624 |
| C | -3.776425 | -1.761498 | -41.876624 |
| C | -4.151213 | -0.362708 | -41.876621 |
| C | -3.413732 | 2.389755  | -41.876613 |
| C | -2.389752 | 3.413735  | -41.876613 |
| C | 0.362711  | 4.151217  | -41.876620 |
| C | 1.761502  | 3.776429  | -41.876623 |
| C | 4.155906  | -0.363213 | -40.633374 |

|   |           |           |            |
|---|-----------|-----------|------------|
| C | 3.780746  | -1.763400 | -40.633371 |
| C | 1.763404  | -3.780742 | -40.633372 |
| C | 0.363216  | -4.155903 | -40.633375 |
| C | -2.392547 | -3.417549 | -40.633380 |
| C | -3.417549 | -2.392547 | -40.633380 |
| C | -4.155903 | 0.363216  | -40.633375 |
| C | -3.780743 | 1.763404  | -40.633372 |
| C | -1.763400 | 3.780746  | -40.633371 |
| C | -0.363213 | 4.155906  | -40.633374 |
| C | 2.392551  | 3.417553  | -40.633379 |
| C | 3.417553  | 2.392551  | -40.633379 |
| C | 3.409833  | -2.392775 | -39.380522 |
| C | 2.392778  | -3.409829 | -39.380522 |
| C | -0.367278 | -4.149346 | -39.380526 |
| C | -1.756613 | -3.777101 | -39.380528 |
| C | -3.777101 | -1.756612 | -39.380528 |
| C | -4.149346 | -0.367278 | -39.380526 |
| C | -3.409830 | 2.392778  | -39.380522 |
| C | -2.392775 | 3.409833  | -39.380522 |
| C | 0.367281  | 4.149349  | -39.380525 |
| C | 1.756616  | 3.777104  | -39.380527 |
| C | 3.777104  | 1.756616  | -39.380527 |
| C | 4.149349  | 0.367281  | -39.380525 |
| C | 1.761839  | -3.780484 | -38.126854 |
| C | 0.364439  | -4.154896 | -38.126856 |
| C | -2.393109 | -3.416071 | -38.126859 |
| C | -3.416071 | -2.393109 | -38.126859 |
| C | -4.154896 | 0.364439  | -38.126856 |
| C | -3.780484 | 1.761839  | -38.126854 |
| C | -1.761837 | 3.780487  | -38.126854 |
| C | -0.364436 | 4.154899  | -38.126855 |
| C | 2.393112  | 3.416073  | -38.126858 |
| C | 3.416073  | 2.393112  | -38.126858 |
| C | 4.154899  | -0.364436 | -38.126855 |
| C | 3.780487  | -1.761836 | -38.126854 |
| C | -0.363317 | -4.156948 | -36.881464 |
| C | -1.763849 | -3.781704 | -36.881465 |
| C | -3.781704 | -1.763849 | -36.881465 |
| C | -4.156948 | -0.363317 | -36.881464 |
| C | -3.418400 | 2.393149  | -36.881462 |
| C | -2.393147 | 3.418402  | -36.881461 |
| C | 0.363320  | 4.156951  | -36.881463 |
| C | 1.763852  | 3.781707  | -36.881464 |
| C | 3.781707  | 1.763852  | -36.881464 |
| C | 4.156951  | 0.363320  | -36.881463 |
| C | 3.418402  | -2.393147 | -36.881461 |
| C | 2.393149  | -3.418400 | -36.881462 |
| C | -2.392426 | -3.410893 | -35.630811 |
| C | -3.410893 | -2.392426 | -35.630811 |
| C | -4.150076 | 0.366436  | -35.630811 |
| C | -3.777308 | 1.757697  | -35.630810 |
| C | -1.757695 | 3.777310  | -35.630809 |
| C | -0.366433 | 4.150078  | -35.630810 |
| C | 2.392428  | 3.410895  | -35.630810 |
| C | 3.410895  | 2.392428  | -35.630810 |
| C | 4.150078  | -0.366433 | -35.630810 |
| C | 3.777310  | -1.757695 | -35.630809 |
| C | 1.757697  | -3.777308 | -35.630810 |
| C | 0.366436  | -4.150076 | -35.630811 |
| C | -3.779154 | -1.760491 | -34.376856 |
| C | -4.153063 | -0.364948 | -34.376856 |
| C | -3.414217 | 2.392619  | -34.376856 |
| C | -2.392617 | 3.414219  | -34.376855 |
| C | 0.364950  | 4.153065  | -34.376855 |
| C | 1.760493  | 3.779156  | -34.376855 |
| C | 3.779156  | 1.760493  | -34.376855 |
| C | 4.153065  | 0.364950  | -34.376855 |
| C | 3.414219  | -2.392617 | -34.376855 |
| C | 2.392619  | -3.414217 | -34.376856 |
| C | -0.364948 | -4.153063 | -34.376856 |

|   |           |           |            |
|---|-----------|-----------|------------|
| C | -1.760491 | -3.779154 | -34.376856 |
| C | -4.156685 | 0.363332  | -33.130122 |
| C | -3.781480 | 1.763694  | -33.130122 |
| C | -1.763693 | 3.781481  | -33.130121 |
| C | -0.363330 | 4.156687  | -33.130121 |
| C | 2.393044  | 3.418174  | -33.130121 |
| C | 3.418174  | 2.393044  | -33.130121 |
| C | 4.156687  | -0.363330 | -33.130121 |
| C | 3.781481  | -1.763693 | -33.130121 |
| C | 1.763694  | -3.781480 | -33.130122 |
| C | 0.363332  | -4.156685 | -33.130122 |
| C | -2.393042 | -3.418173 | -33.130122 |
| C | -3.418173 | -2.393042 | -33.130122 |
| C | -3.411991 | 2.392510  | -31.880783 |
| C | -2.392508 | 3.411992  | -31.880783 |
| C | 0.365967  | 4.151081  | -31.880783 |
| C | 1.758617  | 3.777947  | -31.880783 |
| C | 3.777947  | 1.758617  | -31.880783 |
| C | 4.151081  | 0.365967  | -31.880783 |
| C | 3.411992  | -2.392508 | -31.880783 |
| C | 2.392510  | -3.411991 | -31.880783 |
| C | -0.365966 | -4.151080 | -31.880784 |
| C | -1.758616 | -3.777946 | -31.880784 |
| C | -3.777946 | -1.758615 | -31.880784 |
| C | -4.151080 | -0.365966 | -31.880784 |
| C | -1.759741 | 3.778679  | -30.626890 |
| C | -0.365351 | 4.152284  | -30.626889 |
| C | 2.392589  | 3.413347  | -30.626889 |
| C | 3.413347  | 2.392589  | -30.626889 |
| C | 4.152284  | -0.365351 | -30.626890 |
| C | 3.778679  | -1.759741 | -30.626890 |
| C | 1.759742  | -3.778678 | -30.626890 |
| C | 0.365352  | -4.152283 | -30.626890 |
| C | -2.392588 | -3.413346 | -30.626890 |
| C | -3.413346 | -2.392588 | -30.626890 |
| C | -4.152283 | 0.365352  | -30.626890 |
| C | -3.778678 | 1.759742  | -30.626890 |
| C | 0.363418  | 4.156549  | -29.379061 |
| C | 1.763559  | 3.781407  | -29.379061 |
| C | 3.781407  | 1.763559  | -29.379061 |
| C | 4.156549  | 0.363418  | -29.379061 |
| C | 3.418007  | -2.393038 | -29.379062 |
| C | 2.393039  | -3.418006 | -29.379062 |
| C | -0.363417 | -4.156548 | -29.379062 |
| C | -1.763559 | -3.781406 | -29.379062 |
| C | -3.781406 | -1.763559 | -29.379062 |
| C | -4.156548 | -0.363417 | -29.379062 |
| C | -3.418006 | 2.393039  | -29.379062 |
| C | -2.393038 | 3.418007  | -29.379062 |
| C | 2.392597  | 3.412953  | -28.130611 |
| C | 3.412953  | 2.392597  | -28.130611 |
| C | 4.151950  | -0.365556 | -28.130612 |
| C | 3.778492  | -1.759399 | -28.130612 |
| C | 1.759399  | -3.778492 | -28.130613 |
| C | 0.365557  | -4.151949 | -28.130613 |
| C | -2.392597 | -3.412953 | -28.130612 |
| C | -3.412953 | -2.392597 | -28.130612 |
| C | -4.151949 | 0.365557  | -28.130613 |
| C | -3.778492 | 1.759399  | -28.130613 |
| C | -1.759399 | 3.778492  | -28.130612 |
| C | -0.365556 | 4.151950  | -28.130612 |
| C | 3.778303  | 1.759192  | -26.876949 |
| C | 4.151679  | 0.365645  | -26.876950 |
| C | 3.412673  | -2.392533 | -26.876951 |
| C | 2.392533  | -3.412673 | -26.876951 |
| C | -0.365644 | -4.151679 | -26.876951 |
| C | -1.759191 | -3.778303 | -26.876951 |
| C | -3.778303 | -1.759191 | -26.876951 |
| C | -4.151679 | -0.365644 | -26.876951 |
| C | -3.412673 | 2.392533  | -26.876951 |

|   |           |           |            |
|---|-----------|-----------|------------|
| C | -2.392533 | 3.412673  | -26.876951 |
| C | 0.365645  | 4.151679  | -26.876950 |
| C | 1.759192  | 3.778303  | -26.876949 |
| C | 4.156255  | -0.363546 | -25.628110 |
| C | 3.781216  | -1.763296 | -25.628111 |
| C | 1.763296  | -3.781216 | -25.628111 |
| C | 0.363546  | -4.156255 | -25.628111 |
| C | -2.393008 | -3.417691 | -25.628111 |
| C | -3.417691 | -2.393009 | -25.628111 |
| C | -4.156255 | 0.363546  | -25.628111 |
| C | -3.781216 | 1.763296  | -25.628111 |
| C | -1.763296 | 3.781216  | -25.628111 |
| C | -0.363546 | 4.156255  | -25.628110 |
| C | 2.393008  | 3.417690  | -25.628110 |
| C | 3.417690  | 2.393008  | -25.628110 |
| C | 3.413826  | -2.392665 | -24.380289 |
| C | 2.392665  | -3.413826 | -24.380289 |
| C | -0.365182 | -4.152742 | -24.380289 |
| C | -1.760124 | -3.778992 | -24.380289 |
| C | -3.778992 | -1.760124 | -24.380289 |
| C | -4.152742 | -0.365182 | -24.380289 |
| C | -3.413826 | 2.392665  | -24.380289 |
| C | -2.392665 | 3.413826  | -24.380289 |
| C | 0.365181  | 4.152742  | -24.380288 |
| C | 1.760124  | 3.778992  | -24.380288 |
| C | 3.778992  | 1.760124  | -24.380288 |
| C | 4.152742  | 0.365181  | -24.380288 |
| C | 1.758795  | -3.778029 | -23.127011 |
| C | 0.365849  | -4.151245 | -23.127012 |
| C | -2.392496 | -3.412196 | -23.127012 |
| C | -3.412196 | -2.392497 | -23.127012 |
| C | -4.151245 | 0.365848  | -23.127012 |
| C | -3.778029 | 1.758795  | -23.127011 |
| C | -1.758795 | 3.778028  | -23.127011 |
| C | -0.365849 | 4.151245  | -23.127011 |
| C | 2.392496  | 3.412196  | -23.127011 |
| C | 3.412196  | 2.392496  | -23.127011 |
| C | 4.151245  | -0.365849 | -23.127011 |
| C | 3.778028  | -1.758795 | -23.127011 |
| C | -0.363732 | -4.155848 | -21.877221 |
| C | -1.762934 | -3.780956 | -21.877220 |
| C | -3.780956 | -1.762934 | -21.877220 |
| C | -4.155848 | -0.363732 | -21.877221 |
| C | -3.417244 | 2.392963  | -21.877220 |
| C | -2.392963 | 3.417243  | -21.877220 |
| C | 0.363731  | 4.155847  | -21.877220 |
| C | 1.762933  | 3.780955  | -21.877219 |
| C | 3.780955  | 1.762933  | -21.877219 |
| C | 4.155847  | 0.363731  | -21.877220 |
| C | 3.417243  | -2.392963 | -21.877220 |
| C | 2.392963  | -3.417244 | -21.877221 |
| C | -2.392733 | -3.414647 | -20.629811 |
| C | -3.414647 | -2.392733 | -20.629811 |
| C | -4.153485 | 0.364828  | -20.629811 |
| C | -3.779459 | 1.760799  | -20.629812 |
| C | -1.760800 | 3.779457  | -20.629811 |
| C | -0.364829 | 4.153484  | -20.629811 |
| C | 2.392732  | 3.414646  | -20.629810 |
| C | 3.414646  | 2.392732  | -20.629810 |
| C | 4.153484  | -0.364829 | -20.629811 |
| C | 3.779458  | -1.760800 | -20.629811 |
| C | 1.760799  | -3.779459 | -20.629812 |
| C | 0.364828  | -4.153485 | -20.629811 |
| C | -3.777859 | -1.758552 | -19.377056 |
| C | -4.150975 | -0.365976 | -19.377057 |
| C | -3.411898 | 2.392469  | -19.377056 |
| C | -2.392470 | 3.411897  | -19.377056 |
| C | 0.365975  | 4.150974  | -19.377056 |
| C | 1.758550  | 3.777857  | -19.377056 |
| C | 3.777857  | 1.758550  | -19.377056 |

|   |           |           |            |
|---|-----------|-----------|------------|
| C | 4.150974  | 0.365975  | -19.377056 |
| C | 3.411897  | -2.392470 | -19.377056 |
| C | 2.392469  | -3.411898 | -19.377056 |
| C | -0.365976 | -4.150975 | -19.377057 |
| C | -1.758551 | -3.777859 | -19.377056 |
| C | -4.155332 | 0.363965  | -18.126385 |
| C | -3.780627 | 1.762471  | -18.126384 |
| C | -1.762472 | 3.780625  | -18.126384 |
| C | -0.363966 | 4.155331  | -18.126384 |
| C | 2.392908  | 3.416679  | -18.126384 |
| C | 3.416679  | 2.392908  | -18.126384 |
| C | 4.155331  | -0.363966 | -18.126384 |
| C | 3.780625  | -1.762472 | -18.126384 |
| C | 1.762471  | -3.780627 | -18.126384 |
| C | 0.363965  | -4.155332 | -18.126385 |
| C | -2.392910 | -3.416680 | -18.126385 |
| C | -3.416680 | -2.392910 | -18.126385 |
| C | -3.415398 | 2.392793  | -16.879181 |
| C | -2.392795 | 3.415396  | -16.879181 |
| C | 0.364507  | 4.154164  | -16.879181 |
| C | 1.761418  | 3.779886  | -16.879181 |
| C | 3.779886  | 1.761418  | -16.879181 |
| C | 4.154165  | 0.364507  | -16.879181 |
| C | 3.415396  | -2.392795 | -16.879181 |
| C | 2.392793  | -3.415398 | -16.879181 |
| C | -0.364508 | -4.154166 | -16.879182 |
| C | -1.761420 | -3.779888 | -16.879182 |
| C | -3.779888 | -1.761420 | -16.879182 |
| C | -4.154166 | -0.364508 | -16.879182 |
| C | -1.758459 | 3.777790  | -15.627070 |
| C | -0.366023 | 4.150870  | -15.627070 |
| C | 2.392457  | 3.411784  | -15.627070 |
| C | 3.411784  | 2.392457  | -15.627070 |
| C | 4.150870  | -0.366023 | -15.627070 |
| C | 3.777790  | -1.758459 | -15.627070 |
| C | 1.758457  | -3.777792 | -15.627070 |
| C | 0.366021  | -4.150872 | -15.627070 |
| C | -2.392459 | -3.411786 | -15.627071 |
| C | -3.411786 | -2.392459 | -15.627071 |
| C | -4.150872 | 0.366021  | -15.627070 |
| C | -3.777792 | 1.758457  | -15.627070 |
| C | 0.364241  | 4.154725  | -14.375614 |
| C | 1.761928  | 3.780239  | -14.375614 |
| C | 3.780239  | 1.761928  | -14.375614 |
| C | 4.154725  | 0.364241  | -14.375614 |
| C | 3.416015  | -2.392846 | -14.375614 |
| C | 2.392844  | -3.416017 | -14.375614 |
| C | -0.364243 | -4.154727 | -14.375614 |
| C | -1.761931 | -3.780241 | -14.375614 |
| C | -3.780241 | -1.761931 | -14.375614 |
| C | -4.154727 | -0.364243 | -14.375614 |
| C | -3.416017 | 2.392844  | -14.375614 |
| C | -2.392846 | 3.416015  | -14.375614 |
| C | 2.392849  | 3.416051  | -13.128412 |
| C | 3.416051  | 2.392849  | -13.128412 |
| C | 4.154758  | -0.364229 | -13.128412 |
| C | 3.780261  | -1.761959 | -13.128413 |
| C | 1.761957  | -3.780263 | -13.128413 |
| C | 0.364227  | -4.154761 | -13.128413 |
| C | -2.392851 | -3.416053 | -13.128413 |
| C | -3.416053 | -2.392851 | -13.128413 |
| C | -4.154761 | 0.364227  | -13.128413 |
| C | -3.780263 | 1.761957  | -13.128413 |
| C | -1.761959 | 3.780261  | -13.128413 |
| C | -0.364229 | 4.154758  | -13.128412 |
| C | 3.777831  | 1.758520  | -11.877037 |
| C | 4.150937  | 0.365987  | -11.877038 |
| C | 3.411858  | -2.392463 | -11.877038 |
| C | 2.392461  | -3.411861 | -11.877038 |
| C | -0.365989 | -4.150939 | -11.877038 |

|   |           |           |            |
|---|-----------|-----------|------------|
| C | -1.758523 | -3.777834 | -11.877038 |
| C | -3.777834 | -1.758523 | -11.877038 |
| C | -4.150939 | -0.365989 | -11.877038 |
| C | -3.411861 | 2.392461  | -11.877038 |
| C | -2.392463 | 3.411858  | -11.877038 |
| C | 0.365987  | 4.150937  | -11.877038 |
| C | 1.758520  | 3.777831  | -11.877037 |
| C | 4.154059  | -0.364548 | -10.624927 |
| C | 3.779815  | -1.761334 | -10.624927 |
| C | 1.761331  | -3.779817 | -10.624927 |
| C | 0.364545  | -4.154062 | -10.624927 |
| C | -2.392778 | -3.415288 | -10.624928 |
| C | -3.415288 | -2.392778 | -10.624928 |
| C | -4.154062 | 0.364545  | -10.624927 |
| C | -3.779817 | 1.761331  | -10.624927 |
| C | -1.761334 | 3.779815  | -10.624927 |
| C | -0.364548 | 4.154059  | -10.624927 |
| C | 2.392775  | 3.415286  | -10.624927 |
| C | 3.415286  | 2.392775  | -10.624927 |
| C | 3.416577  | -2.392896 | -9.377527  |
| C | 2.392893  | -3.416580 | -9.377527  |
| C | -0.364006 | -4.155239 | -9.377527  |
| C | -1.762393 | -3.780566 | -9.377527  |
| C | -3.780565 | -1.762393 | -9.377527  |
| C | -4.155239 | -0.364006 | -9.377527  |
| C | -3.416580 | 2.392893  | -9.377527  |
| C | -2.392896 | 3.416577  | -9.377527  |
| C | 0.364003  | 4.155236  | -9.377527  |
| C | 1.762390  | 3.780563  | -9.377527  |
| C | 3.780563  | 1.762390  | -9.377527  |
| C | 4.155236  | 0.364003  | -9.377527  |
| C | 1.758733  | -3.777981 | -8.126944  |
| C | 0.365876  | -4.151173 | -8.126944  |
| C | -2.392485 | -3.412119 | -8.126944  |
| C | -3.412119 | -2.392485 | -8.126944  |
| C | -4.151173 | 0.365876  | -8.126944  |
| C | -3.777981 | 1.758733  | -8.126944  |
| C | -1.758736 | 3.777978  | -8.126943  |
| C | -0.365879 | 4.151170  | -8.126943  |
| C | 2.392482  | 3.412116  | -8.126943  |
| C | 3.412116  | 2.392482  | -8.126943  |
| C | 4.151170  | -0.365879 | -8.126943  |
| C | 3.777978  | -1.758736 | -8.126943  |
| C | -0.364865 | -4.153373 | -6.874340  |
| C | -1.760715 | -3.779379 | -6.874340  |
| C | -3.779379 | -1.760715 | -6.874340  |
| C | -4.153373 | -0.364865 | -6.874340  |
| C | -3.414533 | 2.392704  | -6.874340  |
| C | -2.392707 | 3.414530  | -6.874340  |
| C | 0.364862  | 4.153370  | -6.874339  |
| C | 1.760712  | 3.779376  | -6.874339  |
| C | 3.779376  | 1.760712  | -6.874339  |
| C | 4.153370  | 0.364862  | -6.874339  |
| C | 3.414530  | -2.392707 | -6.874340  |
| C | 2.392704  | -3.414533 | -6.874340  |
| C | -2.392928 | -3.416948 | -5.626554  |
| C | -3.416948 | -2.392928 | -5.626554  |
| C | -4.155574 | 0.363846  | -5.626554  |
| C | -3.780777 | 1.762693  | -5.626554  |
| C | -1.762696 | 3.780774  | -5.626554  |
| C | -0.363849 | 4.155571  | -5.626554  |
| C | 2.392925  | 3.416945  | -5.626554  |
| C | 3.416945  | 2.392925  | -5.626554  |
| C | 4.155571  | -0.363849 | -5.626554  |
| C | 3.780774  | -1.762696 | -5.626554  |
| C | 1.762693  | -3.780777 | -5.626554  |
| C | 0.363846  | -4.155574 | -5.626554  |
| C | -3.778226 | -1.759086 | -4.376771  |
| C | -4.151560 | -0.365699 | -4.376771  |
| C | -3.412545 | 2.392519  | -4.376771  |



|   |           |           |           |
|---|-----------|-----------|-----------|
| C | -2.392522 | 3.412541  | -4.376771 |
| C | 0.365695  | 4.151557  | -4.376771 |
| C | 1.759082  | 3.778223  | -4.376771 |
| C | 3.778223  | 1.759082  | -4.376771 |
| C | 4.151557  | 0.365695  | -4.376771 |
| C | 3.412541  | -2.392522 | -4.376771 |
| C | 2.392519  | -3.412545 | -4.376771 |
| C | -0.365699 | -4.151560 | -4.376771 |
| C | -1.759086 | -3.778226 | -4.376771 |
| C | -4.152701 | 0.365171  | -3.123861 |
| C | -3.778952 | 1.760108  | -3.123861 |
| C | -1.760111 | 3.778949  | -3.123860 |
| C | -0.365174 | 4.152698  | -3.123860 |
| C | 2.392636  | 3.413793  | -3.123861 |
| C | 3.413793  | 2.392635  | -3.123861 |
| C | 4.152698  | -0.365174 | -3.123860 |
| C | 3.778949  | -1.760111 | -3.123860 |
| C | 1.760108  | -3.778952 | -3.123861 |
| C | 0.365171  | -4.152702 | -3.123861 |
| C | -2.392639 | -3.413796 | -3.123861 |
| C | -3.413796 | -2.392639 | -3.123861 |
| C | -3.417139 | 2.392942  | -1.875525 |
| C | -2.392946 | 3.417136  | -1.875525 |
| C | 0.363765  | 4.155744  | -1.875525 |
| C | 1.762849  | 3.780884  | -1.875525 |
| C | 3.780884  | 1.762849  | -1.875525 |
| C | 4.155744  | 0.363765  | -1.875525 |
| C | 3.417136  | -2.392946 | -1.875525 |
| C | 2.392942  | -3.417139 | -1.875525 |
| C | -0.363769 | -4.155748 | -1.875525 |
| C | -1.762853 | -3.780887 | -1.875525 |
| C | -3.780887 | -1.762853 | -1.875525 |
| C | -4.155748 | -0.363769 | -1.875525 |
| C | -1.759552 | 3.778553  | -0.626507 |
| C | -0.365460 | 4.152076  | -0.626507 |
| C | 2.392572  | 3.413110  | -0.626507 |
| C | 3.413110  | 2.392572  | -0.626507 |
| C | 4.152076  | -0.365461 | -0.626507 |
| C | 3.778553  | -1.759552 | -0.626507 |
| C | 1.759548  | -3.778557 | -0.626507 |
| C | 0.365457  | -4.152079 | -0.626507 |
| C | -2.392576 | -3.413114 | -0.626507 |
| C | -3.413114 | -2.392576 | -0.626507 |
| C | -4.152079 | 0.365457  | -0.626507 |
| C | -3.778556 | 1.759548  | -0.626508 |
| C | 0.365457  | 4.152076  | 0.626507  |
| C | 1.759548  | 3.778553  | 0.626508  |
| C | 3.778553  | 1.759548  | 0.626508  |
| C | 4.152076  | 0.365457  | 0.626507  |
| C | 3.413110  | -2.392576 | 0.626507  |
| C | 2.392572  | -3.413114 | 0.626507  |
| C | -0.365461 | -4.152079 | 0.626507  |
| C | -1.759552 | -3.778557 | 0.626507  |
| C | -3.778557 | -1.759552 | 0.626507  |
| C | -4.152079 | -0.365461 | 0.626507  |
| C | -3.413114 | 2.392572  | 0.626507  |
| C | -2.392576 | 3.413110  | 0.626507  |
| C | 2.392942  | 3.417136  | 1.875525  |
| C | 3.417136  | 2.392942  | 1.875525  |
| C | 4.155744  | -0.363769 | 1.875525  |
| C | 3.780884  | -1.762853 | 1.875525  |
| C | 1.762849  | -3.780887 | 1.875525  |
| C | 0.363765  | -4.155748 | 1.875525  |
| C | -2.392946 | -3.417139 | 1.875525  |
| C | -3.417139 | -2.392946 | 1.875525  |
| C | -4.155748 | 0.363765  | 1.875525  |
| C | -3.780887 | 1.762849  | 1.875525  |
| C | -1.762853 | 3.780884  | 1.875525  |
| C | -0.363769 | 4.155744  | 1.875525  |
| C | 3.778949  | 1.760108  | 3.123860  |

|   |           |           |          |
|---|-----------|-----------|----------|
| C | 4.152698  | 0.365171  | 3.123861 |
| C | 3.413793  | -2.392639 | 3.123861 |
| C | 2.392635  | -3.413796 | 3.123861 |
| C | -0.365174 | -4.152702 | 3.123861 |
| C | -1.760111 | -3.778952 | 3.123861 |
| C | -3.778952 | -1.760111 | 3.123861 |
| C | -4.152702 | -0.365174 | 3.123861 |
| C | -3.413796 | 2.392635  | 3.123861 |
| C | -2.392639 | 3.413793  | 3.123861 |
| C | 0.365171  | 4.152698  | 3.123861 |
| C | 1.760108  | 3.778949  | 3.123860 |
| C | 4.151557  | -0.365699 | 4.376771 |
| C | 3.778223  | -1.759086 | 4.376771 |
| C | 1.759082  | -3.778226 | 4.376771 |
| C | 0.365695  | -4.151560 | 4.376771 |
| C | -2.392522 | -3.412545 | 4.376771 |
| C | -3.412545 | -2.392522 | 4.376771 |
| C | -4.151560 | 0.365695  | 4.376771 |
| C | -3.778226 | 1.759082  | 4.376771 |
| C | -1.759086 | 3.778223  | 4.376771 |
| C | -0.365699 | 4.151557  | 4.376771 |
| C | 2.392519  | 3.412541  | 4.376771 |
| C | 3.412541  | 2.392519  | 4.376771 |
| C | 3.416945  | -2.392928 | 5.626554 |
| C | 2.392925  | -3.416949 | 5.626554 |
| C | -0.363849 | -4.155574 | 5.626554 |
| C | -1.762696 | -3.780777 | 5.626554 |
| C | -3.780777 | -1.762696 | 5.626554 |
| C | -4.155574 | -0.363849 | 5.626554 |
| C | -3.416949 | 2.392925  | 5.626554 |
| C | -2.392928 | 3.416945  | 5.626554 |
| C | 0.363846  | 4.155570  | 5.626554 |
| C | 1.762693  | 3.780774  | 5.626554 |
| C | 3.780774  | 1.762693  | 5.626554 |
| C | 4.155570  | 0.363846  | 5.626554 |
| C | 1.760712  | -3.779379 | 6.874339 |
| C | 0.364862  | -4.153374 | 6.874340 |
| C | -2.392707 | -3.414533 | 6.874340 |
| C | -3.414533 | -2.392707 | 6.874340 |
| C | -4.153374 | 0.364862  | 6.874340 |
| C | -3.779379 | 1.760712  | 6.874339 |
| C | -1.760715 | 3.779376  | 6.874339 |
| C | -0.364865 | 4.153370  | 6.874339 |
| C | 2.392704  | 3.414530  | 6.874340 |
| C | 3.414530  | 2.392704  | 6.874340 |
| C | 4.153370  | -0.364865 | 6.874339 |
| C | 3.779376  | -1.760715 | 6.874339 |
| C | -0.365879 | -4.151174 | 8.126944 |
| C | -1.758736 | -3.777981 | 8.126944 |
| C | -3.777981 | -1.758736 | 8.126944 |
| C | -4.151174 | -0.365879 | 8.126944 |
| C | -3.412119 | 2.392482  | 8.126943 |
| C | -2.392485 | 3.412116  | 8.126943 |
| C | 0.365876  | 4.151170  | 8.126943 |
| C | 1.758733  | 3.777978  | 8.126943 |
| C | 3.777978  | 1.758732  | 8.126943 |
| C | 4.151170  | 0.365876  | 8.126943 |
| C | 3.412116  | -2.392485 | 8.126943 |
| C | 2.392482  | -3.412119 | 8.126943 |
| C | -2.392897 | -3.416580 | 9.377527 |
| C | -3.416580 | -2.392897 | 9.377527 |
| C | -4.155239 | 0.364003  | 9.377527 |
| C | -3.780566 | 1.762390  | 9.377527 |
| C | -1.762393 | 3.780562  | 9.377527 |
| C | -0.364006 | 4.155236  | 9.377527 |
| C | 2.392893  | 3.416577  | 9.377527 |
| C | 3.416577  | 2.392893  | 9.377527 |
| C | 4.155236  | -0.364006 | 9.377527 |
| C | 3.780562  | -1.762393 | 9.377527 |
| C | 1.762390  | -3.780566 | 9.377527 |

|   |           |           |           |
|---|-----------|-----------|-----------|
| C | 0.364003  | -4.155239 | 9.377527  |
| C | -3.779817 | -1.761334 | 10.624927 |
| C | -4.154062 | -0.364548 | 10.624927 |
| C | -3.415289 | 2.392775  | 10.624928 |
| C | -2.392778 | 3.415285  | 10.624927 |
| C | 0.364545  | 4.154059  | 10.624927 |
| C | 1.761331  | 3.779814  | 10.624927 |
| C | 3.779814  | 1.761331  | 10.624927 |
| C | 4.154059  | 0.364545  | 10.624927 |
| C | 3.415285  | -2.392778 | 10.624927 |
| C | 2.392775  | -3.415289 | 10.624928 |
| C | -0.364548 | -4.154062 | 10.624927 |
| C | -1.761334 | -3.779817 | 10.624927 |
| C | -4.150940 | 0.365987  | 11.877038 |
| C | -3.777834 | 1.758520  | 11.877038 |
| C | -1.758523 | 3.777831  | 11.877038 |
| C | -0.365990 | 4.150937  | 11.877038 |
| C | 2.392461  | 3.411858  | 11.877037 |
| C | 3.411858  | 2.392461  | 11.877037 |
| C | 4.150937  | -0.365990 | 11.877038 |
| C | 3.777831  | -1.758523 | 11.877038 |
| C | 1.758520  | -3.777834 | 11.877038 |
| C | 0.365987  | -4.150940 | 11.877038 |
| C | -2.392464 | -3.411861 | 11.877038 |
| C | -3.411861 | -2.392464 | 11.877038 |
| C | -3.416053 | 2.392848  | 13.128412 |
| C | -2.392851 | 3.416051  | 13.128412 |
| C | 0.364227  | 4.154758  | 13.128412 |
| C | 1.761957  | 3.780260  | 13.128413 |
| C | 3.780260  | 1.761957  | 13.128413 |
| C | 4.154758  | 0.364227  | 13.128412 |
| C | 3.416051  | -2.392851 | 13.128412 |
| C | 2.392848  | -3.416054 | 13.128412 |
| C | -0.364229 | -4.154761 | 13.128413 |
| C | -1.761959 | -3.780263 | 13.128413 |
| C | -3.780263 | -1.761959 | 13.128413 |
| C | -4.154761 | -0.364230 | 13.128413 |
| C | -1.761931 | 3.780239  | 14.375614 |
| C | -0.364244 | 4.154725  | 14.375614 |
| C | 2.392844  | 3.416015  | 14.375614 |
| C | 3.416015  | 2.392844  | 14.375614 |
| C | 4.154725  | -0.364244 | 14.375614 |
| C | 3.780239  | -1.761931 | 14.375614 |
| C | 1.761928  | -3.780242 | 14.375614 |
| C | 0.364241  | -4.154728 | 14.375614 |
| C | -2.392846 | -3.416018 | 14.375615 |
| C | -3.416018 | -2.392846 | 14.375615 |
| C | -4.154728 | 0.364241  | 14.375614 |
| C | -3.780242 | 1.761928  | 14.375614 |
| C | 0.366020  | 4.150870  | 15.627070 |
| C | 1.758457  | 3.777790  | 15.627070 |
| C | 3.777790  | 1.758457  | 15.627070 |
| C | 4.150870  | 0.366020  | 15.627070 |
| C | 3.411783  | -2.392459 | 15.627070 |
| C | 2.392457  | -3.411786 | 15.627070 |
| C | -0.366023 | -4.150872 | 15.627070 |
| C | -1.758460 | -3.777792 | 15.627070 |
| C | -3.777792 | -1.758460 | 15.627070 |
| C | -4.150872 | -0.366023 | 15.627070 |
| C | -3.411786 | 2.392457  | 15.627070 |
| C | -2.392459 | 3.411783  | 15.627070 |
| C | 2.392793  | 3.415396  | 16.879181 |
| C | 3.415396  | 2.392793  | 16.879181 |
| C | 4.154164  | -0.364509 | 16.879181 |
| C | 3.779886  | -1.761420 | 16.879181 |
| C | 1.761418  | -3.779888 | 16.879182 |
| C | 0.364506  | -4.154167 | 16.879182 |
| C | -2.392795 | -3.415398 | 16.879182 |
| C | -3.415398 | -2.392795 | 16.879182 |
| C | -4.154167 | 0.364506  | 16.879182 |

|   |           |           |           |
|---|-----------|-----------|-----------|
| C | -3.779888 | 1.761418  | 16.879182 |
| C | -1.761420 | 3.779886  | 16.879181 |
| C | -0.364509 | 4.154164  | 16.879181 |
| C | 3.780625  | 1.762470  | 18.126384 |
| C | 4.155331  | 0.363965  | 18.126384 |
| C | 3.416678  | -2.392910 | 18.126384 |
| C | 2.392908  | -3.416681 | 18.126384 |
| C | -0.363967 | -4.155333 | 18.126385 |
| C | -1.762473 | -3.780627 | 18.126385 |
| C | -3.780627 | -1.762473 | 18.126385 |
| C | -4.155333 | -0.363967 | 18.126385 |
| C | -3.416681 | 2.392908  | 18.126384 |
| C | -2.392910 | 3.416678  | 18.126384 |
| C | 0.363965  | 4.155331  | 18.126384 |
| C | 1.762470  | 3.780625  | 18.126384 |
| C | 4.150974  | -0.365977 | 19.377056 |
| C | 3.777857  | -1.758552 | 19.377056 |
| C | 1.758550  | -3.777859 | 19.377056 |
| C | 0.365975  | -4.150976 | 19.377056 |
| C | -2.392470 | -3.411898 | 19.377057 |
| C | -3.411898 | -2.392470 | 19.377057 |
| C | -4.150976 | 0.365975  | 19.377056 |
| C | -3.777859 | 1.758550  | 19.377056 |
| C | -1.758552 | 3.777857  | 19.377056 |
| C | -0.365977 | 4.150974  | 19.377056 |
| C | 2.392468  | 3.411896  | 19.377056 |
| C | 3.411896  | 2.392468  | 19.377056 |
| C | 3.414646  | -2.392733 | 20.629811 |
| C | 2.392732  | -3.414648 | 20.629811 |
| C | -0.364830 | -4.153485 | 20.629812 |
| C | -1.760800 | -3.779459 | 20.629812 |
| C | -3.779459 | -1.760800 | 20.629812 |
| C | -4.153485 | -0.364830 | 20.629812 |
| C | -3.414648 | 2.392732  | 20.629811 |
| C | -2.392733 | 3.414646  | 20.629811 |
| C | 0.364828  | 4.153484  | 20.629811 |
| C | 1.760798  | 3.779457  | 20.629811 |
| C | 3.779457  | 1.760798  | 20.629811 |
| C | 4.153484  | 0.364828  | 20.629811 |
| C | 1.762933  | -3.780957 | 21.877220 |
| C | 0.363731  | -4.155848 | 21.877220 |
| C | -2.392964 | -3.417244 | 21.877221 |
| C | -3.417244 | -2.392964 | 21.877221 |
| C | -4.155848 | 0.363731  | 21.877220 |
| C | -3.780957 | 1.762933  | 21.877220 |
| C | -1.762934 | 3.780955  | 21.877220 |
| C | -0.363732 | 4.155847  | 21.877220 |
| C | 2.392962  | 3.417243  | 21.877220 |
| C | 3.417243  | 2.392962  | 21.877220 |
| C | 4.155847  | -0.363732 | 21.877220 |
| C | 3.780955  | -1.762934 | 21.877220 |
| C | -0.365849 | -4.151246 | 23.127012 |
| C | -1.758795 | -3.778029 | 23.127012 |
| C | -3.778029 | -1.758795 | 23.127012 |
| C | -4.151246 | -0.365849 | 23.127012 |
| C | -3.412196 | 2.392496  | 23.127011 |
| C | -2.392497 | 3.412195  | 23.127011 |
| C | 0.365848  | 4.151245  | 23.127011 |
| C | 1.758794  | 3.778028  | 23.127011 |
| C | 3.778028  | 1.758794  | 23.127011 |
| C | 4.151245  | 0.365848  | 23.127011 |
| C | 3.412195  | -2.392497 | 23.127011 |
| C | 2.392496  | -3.412196 | 23.127011 |
| C | -2.392665 | -3.413826 | 24.380289 |
| C | -3.413826 | -2.392665 | 24.380289 |
| C | -4.152743 | 0.365181  | 24.380289 |
| C | -3.778992 | 1.760123  | 24.380289 |
| C | -1.760124 | 3.778992  | 24.380289 |
| C | -0.365182 | 4.152742  | 24.380288 |
| C | 2.392665  | 3.413826  | 24.380288 |

|   |           |           |           |
|---|-----------|-----------|-----------|
| C | 3.413826  | 2.392665  | 24.380288 |
| C | 4.152742  | -0.365182 | 24.380288 |
| C | 3.778992  | -1.760124 | 24.380289 |
| C | 1.760123  | -3.778992 | 24.380289 |
| C | 0.365181  | -4.152743 | 24.380289 |
| C | -3.781216 | -1.763297 | 25.628111 |
| C | -4.156255 | -0.363546 | 25.628111 |
| C | -3.417691 | 2.393008  | 25.628110 |
| C | -2.393009 | 3.417690  | 25.628110 |
| C | 0.363545  | 4.156255  | 25.628110 |
| C | 1.763296  | 3.781215  | 25.628110 |
| C | 3.781215  | 1.763296  | 25.628110 |
| C | 4.156255  | 0.363545  | 25.628110 |
| C | 3.417690  | -2.393009 | 25.628110 |
| C | 2.393008  | -3.417691 | 25.628110 |
| C | -0.363546 | -4.156255 | 25.628111 |
| C | -1.763297 | -3.781216 | 25.628111 |
| C | -4.151679 | 0.365644  | 26.876951 |
| C | -3.778303 | 1.759191  | 26.876950 |
| C | -1.759192 | 3.778303  | 26.876950 |
| C | -0.365645 | 4.151679  | 26.876950 |
| C | 2.392533  | 3.412673  | 26.876950 |
| C | 3.412673  | 2.392533  | 26.876950 |
| C | 4.151679  | -0.365645 | 26.876950 |
| C | 3.778303  | -1.759192 | 26.876950 |
| C | 1.759191  | -3.778303 | 26.876950 |
| C | 0.365644  | -4.151679 | 26.876951 |
| C | -2.392533 | -3.412673 | 26.876952 |
| C | -3.412673 | -2.392533 | 26.876952 |
| C | -3.412953 | 2.392597  | 28.130612 |
| C | -2.392597 | 3.412953  | 28.130611 |
| C | 0.365556  | 4.151950  | 28.130612 |
| C | 1.759399  | 3.778492  | 28.130612 |
| C | 3.778492  | 1.759399  | 28.130612 |
| C | 4.151949  | 0.365556  | 28.130612 |
| C | 3.412953  | -2.392597 | 28.130611 |
| C | 2.392597  | -3.412953 | 28.130612 |
| C | -0.365556 | -4.151949 | 28.130613 |
| C | -1.759399 | -3.778492 | 28.130613 |
| C | -3.778492 | -1.759399 | 28.130613 |
| C | -4.151949 | -0.365556 | 28.130613 |
| C | -1.763559 | 3.781407  | 29.379061 |
| C | -0.363417 | 4.156549  | 29.379061 |
| C | 2.393039  | 3.418007  | 29.379061 |
| C | 3.418007  | 2.393039  | 29.379061 |
| C | 4.156549  | -0.363417 | 29.379061 |
| C | 3.781407  | -1.763559 | 29.379061 |
| C | 1.763559  | -3.781406 | 29.379062 |
| C | 0.363418  | -4.156549 | 29.379062 |
| C | -2.393039 | -3.418007 | 29.379063 |
| C | -3.418007 | -2.393039 | 29.379063 |
| C | -4.156549 | 0.363418  | 29.379062 |
| C | -3.781406 | 1.763559  | 29.379062 |
| C | 0.365352  | 4.152284  | 30.626889 |
| C | 1.759742  | 3.778679  | 30.626889 |
| C | 3.778679  | 1.759742  | 30.626889 |
| C | 4.152284  | 0.365352  | 30.626889 |
| C | 3.413346  | -2.392588 | 30.626890 |
| C | 2.392589  | -3.413346 | 30.626890 |
| C | -0.365351 | -4.152283 | 30.626891 |
| C | -1.759742 | -3.778678 | 30.626891 |
| C | -3.778678 | -1.759742 | 30.626891 |
| C | -4.152283 | -0.365351 | 30.626890 |
| C | -3.413346 | 2.392589  | 30.626890 |
| C | -2.392588 | 3.413346  | 30.626890 |
| C | 2.392510  | 3.411992  | 31.880782 |
| C | 3.411992  | 2.392510  | 31.880782 |
| C | 4.151081  | -0.365966 | 31.880783 |
| C | 3.777947  | -1.758616 | 31.880783 |
| C | 1.758617  | -3.777946 | 31.880783 |

|   |           |           |           |
|---|-----------|-----------|-----------|
| C | 0.365967  | -4.151080 | 31.880784 |
| C | -2.392509 | -3.411991 | 31.880784 |
| C | -3.411991 | -2.392508 | 31.880784 |
| C | -4.151080 | 0.365967  | 31.880784 |
| C | -3.777946 | 1.758617  | 31.880783 |
| C | -1.758616 | 3.777947  | 31.880783 |
| C | -0.365966 | 4.151081  | 31.880783 |
| C | 3.781481  | 1.763694  | 33.130121 |
| C | 4.156687  | 0.363332  | 33.130121 |
| C | 3.418174  | -2.393042 | 33.130121 |
| C | 2.393044  | -3.418173 | 33.130121 |
| C | -0.363330 | -4.156685 | 33.130122 |
| C | -1.763693 | -3.781480 | 33.130122 |
| C | -3.781480 | -1.763693 | 33.130122 |
| C | -4.156685 | -0.363330 | 33.130122 |
| C | -3.418173 | 2.393044  | 33.130121 |
| C | -2.393042 | 3.418174  | 33.130121 |
| C | 0.363331  | 4.156687  | 33.130121 |
| C | 1.763694  | 3.781481  | 33.130121 |
| C | 4.153065  | -0.364948 | 34.376855 |
| C | 3.779156  | -1.760491 | 34.376855 |
| C | 1.760493  | -3.779154 | 34.376856 |
| C | 0.364950  | -4.153063 | 34.376856 |
| C | -2.392617 | -3.414217 | 34.376856 |
| C | -3.414217 | -2.392617 | 34.376856 |
| C | -4.153063 | 0.364950  | 34.376856 |
| C | -3.779154 | 1.760493  | 34.376856 |
| C | -1.760491 | 3.779156  | 34.376855 |
| C | -0.364948 | 4.153065  | 34.376855 |
| C | 2.392619  | 3.414219  | 34.376855 |
| C | 3.414219  | 2.392619  | 34.376855 |
| C | 3.410895  | -2.392426 | 35.630811 |
| C | 2.392428  | -3.410893 | 35.630811 |
| C | -0.366433 | -4.150076 | 35.630811 |
| C | -1.757695 | -3.777308 | 35.630810 |
| C | -3.777308 | -1.757695 | 35.630810 |
| C | -4.150076 | -0.366433 | 35.630811 |
| C | -3.410893 | 2.392428  | 35.630811 |
| C | -2.392426 | 3.410895  | 35.630811 |
| C | 0.366436  | 4.150078  | 35.630810 |
| C | 1.757697  | 3.777310  | 35.630809 |
| C | 3.777310  | 1.757697  | 35.630809 |
| C | 4.150078  | 0.366436  | 35.630810 |
| C | 1.763852  | -3.781704 | 36.881465 |
| C | 0.363320  | -4.156948 | 36.881464 |
| C | -2.393147 | -3.418400 | 36.881462 |
| C | -3.418400 | -2.393146 | 36.881462 |
| C | -4.156948 | 0.363320  | 36.881464 |
| C | -3.781704 | 1.763852  | 36.881465 |
| C | -1.763849 | 3.781707  | 36.881464 |
| C | -0.363317 | 4.156951  | 36.881463 |
| C | 2.393149  | 3.418402  | 36.881461 |
| C | 3.418402  | 2.393149  | 36.881461 |
| C | 4.156951  | -0.363317 | 36.881463 |
| C | 3.781707  | -1.763849 | 36.881464 |
| C | -0.364436 | -4.154896 | 38.126856 |
| C | -1.761836 | -3.780484 | 38.126855 |
| C | -3.780484 | -1.761836 | 38.126855 |
| C | -4.154896 | -0.364436 | 38.126856 |
| C | -3.416071 | 2.393112  | 38.126859 |
| C | -2.393109 | 3.416074  | 38.126858 |
| C | 0.364439  | 4.154899  | 38.126855 |
| C | 1.761839  | 3.780487  | 38.126853 |
| C | 3.780487  | 1.761839  | 38.126853 |
| C | 4.154899  | 0.364439  | 38.126855 |
| C | 3.416074  | -2.393109 | 38.126858 |
| C | 2.393112  | -3.416071 | 38.126859 |
| C | -2.392775 | -3.409829 | 39.380523 |
| C | -3.409829 | -2.392775 | 39.380523 |
| C | -4.149346 | 0.367282  | 39.380526 |

|   |           |           |           |
|---|-----------|-----------|-----------|
| C | -3.777101 | 1.756616  | 39.380528 |
| C | -1.756612 | 3.777104  | 39.380527 |
| C | -0.367278 | 4.149349  | 39.380525 |
| C | 2.392778  | 3.409833  | 39.380521 |
| C | 3.409833  | 2.392778  | 39.380521 |
| C | 4.149349  | -0.367278 | 39.380525 |
| C | 3.777104  | -1.756612 | 39.380527 |
| C | 1.756616  | -3.777101 | 39.380528 |
| C | 0.367281  | -4.149346 | 39.380526 |
| C | -3.780742 | -1.763400 | 40.633372 |
| C | -4.155902 | -0.363213 | 40.633375 |
| C | -3.417549 | 2.392551  | 40.633379 |
| C | -2.392547 | 3.417553  | 40.633379 |
| C | 0.363217  | 4.155906  | 40.633374 |
| C | 1.763404  | 3.780746  | 40.633371 |
| C | 3.780746  | 1.763404  | 40.633371 |
| C | 4.155906  | 0.363217  | 40.633374 |
| C | 3.417553  | -2.392547 | 40.633379 |
| C | 2.392551  | -3.417549 | 40.633379 |
| C | -0.363213 | -4.155902 | 40.633375 |
| C | -1.763400 | -3.780742 | 40.633372 |
| C | -4.151213 | 0.362712  | 41.876621 |
| C | -3.776425 | 1.761502  | 41.876624 |
| C | -1.761498 | 3.776429  | 41.876623 |
| C | -0.362708 | 4.151217  | 41.876620 |
| C | 2.389756  | 3.413736  | 41.876612 |
| C | 3.413736  | 2.389756  | 41.876612 |
| C | 4.151217  | -0.362708 | 41.876620 |
| C | 3.776429  | -1.761498 | 41.876623 |
| C | 1.761502  | -3.776425 | 41.876624 |
| C | 0.362712  | -4.151213 | 41.876621 |
| C | -2.389751 | -3.413731 | 41.876614 |
| C | -3.413731 | -2.389751 | 41.876614 |
| C | -3.395659 | 2.384252  | 43.129905 |
| C | -2.384248 | 3.395664  | 43.129905 |
| C | 0.366982  | 4.132836  | 43.129898 |
| C | 1.748603  | 3.762640  | 43.129888 |
| C | 3.762640  | 1.748603  | 43.129888 |
| C | 4.132836  | 0.366982  | 43.129898 |
| C | 3.395664  | -2.384248 | 43.129905 |
| C | 2.384252  | -3.395659 | 43.129905 |
| C | -0.366977 | -4.132831 | 43.129899 |
| C | -1.748598 | -3.762635 | 43.129890 |
| C | -3.762635 | -1.748598 | 43.129890 |
| C | -4.132831 | -0.366977 | 43.129899 |
| C | -1.761752 | 3.770202  | 44.391514 |
| C | -0.359356 | 4.145968  | 44.391516 |
| C | 2.384243  | 3.410862  | 44.391491 |
| C | 3.410862  | 2.384243  | 44.391491 |
| C | 4.145968  | -0.359356 | 44.391516 |
| C | 3.770202  | -1.761752 | 44.391514 |
| C | 1.761757  | -3.770197 | 44.391515 |
| C | 0.359361  | -4.145963 | 44.391517 |
| C | -2.384238 | -3.410857 | 44.391493 |
| C | -3.410857 | -2.384238 | 44.391493 |
| C | -4.145963 | 0.359361  | 44.391517 |
| C | -3.770197 | 1.761757  | 44.391515 |
| C | 0.363411  | 4.196667  | 45.631393 |
| C | 1.783671  | 3.816165  | 45.631370 |
| C | 3.816165  | 1.783671  | 45.631370 |
| C | 4.196667  | 0.363411  | 45.631393 |
| C | 3.452761  | -2.413064 | 45.631395 |
| C | 2.413069  | -3.452755 | 45.631395 |
| C | -0.363405 | -4.196662 | 45.631395 |
| C | -1.783666 | -3.816160 | 45.631372 |
| C | -3.816160 | -1.783666 | 45.631372 |
| C | -4.196662 | -0.363405 | 45.631395 |
| C | -3.452755 | 2.413069  | 45.631395 |
| C | -2.413064 | 3.452761  | 45.631395 |
| C | 2.489253  | 3.467893  | 46.846991 |

|   |           |           |            |
|---|-----------|-----------|------------|
| C | 3.467893  | 2.489253  | 46.846991  |
| C | 4.247720  | -0.421740 | 46.847028  |
| C | 3.889548  | -1.758600 | 46.847026  |
| C | 1.758606  | -3.889542 | 46.847027  |
| C | 0.421746  | -4.247714 | 46.847029  |
| C | -2.489247 | -3.467888 | 46.846993  |
| C | -3.467888 | -2.489247 | 46.846993  |
| C | -4.247714 | 0.421746  | 46.847029  |
| C | -3.889542 | 1.758606  | 46.847027  |
| C | -1.758600 | 3.889548  | 46.847026  |
| C | -0.421740 | 4.247720  | 46.847028  |
| H | -3.891958 | 2.156094  | -47.802926 |
| H | -2.156089 | 3.891963  | -47.802926 |
| H | -0.078814 | 4.448318  | -47.802976 |
| H | 2.292407  | 3.813002  | -47.802974 |
| H | 3.813002  | 2.292407  | -47.802974 |
| H | 4.448318  | -0.078814 | -47.802976 |
| H | 3.891963  | -2.156089 | -47.802926 |
| H | 2.156094  | -3.891958 | -47.802926 |
| H | 0.078819  | -4.448313 | -47.802977 |
| H | -2.292402 | -3.812997 | -47.802976 |
| H | -3.812997 | -2.292402 | -47.802976 |
| H | -4.448313 | 0.078819  | -47.802977 |
| H | 2.156095  | 3.891964  | 47.802925  |
| H | 3.891964  | 2.156095  | 47.802925  |
| H | 4.448318  | 0.078820  | 47.802976  |
| H | 3.813002  | -2.292402 | 47.802975  |
| H | 2.292408  | -3.812996 | 47.802975  |
| H | -0.078814 | -4.448312 | 47.802977  |
| H | -2.156089 | -3.891957 | 47.802927  |
| H | -3.891958 | -2.156089 | 47.802927  |
| H | -4.448312 | -0.078814 | 47.802977  |
| H | -3.812996 | 2.292408  | 47.802975  |
| H | -2.292402 | 3.813002  | 47.802975  |
| H | 0.078820  | 4.448318  | 47.802976  |

Nanotube (6,6) u38v6s  
B3LYP/STO-3G Energy: -34800.732243

|   |           |           |            |
|---|-----------|-----------|------------|
| C | -0.691466 | 4.211097  | -47.487079 |
| C | 0.691466  | 4.211097  | -47.487079 |
| C | 3.301391  | 2.704490  | -47.487017 |
| C | 3.992827  | 1.506818  | -47.487018 |
| C | 3.992827  | -1.506819 | -47.487018 |
| C | 3.301391  | -2.704491 | -47.487017 |
| C | 0.691466  | -4.211099 | -47.487078 |
| C | -0.691466 | -4.211099 | -47.487078 |
| C | -3.301391 | -2.704491 | -47.487017 |
| C | -3.992827 | -1.506819 | -47.487018 |
| C | -3.992827 | 1.506818  | -47.487018 |
| C | -3.301391 | 2.704490  | -47.487017 |
| C | 1.437240  | 3.957497  | -46.270479 |
| C | 2.708721  | 3.223468  | -46.270452 |
| C | 4.145882  | 0.734071  | -46.270449 |
| C | 4.145882  | -0.734072 | -46.270449 |
| C | 2.708721  | -3.223470 | -46.270452 |
| C | 1.437240  | -3.957498 | -46.270479 |
| C | -1.437240 | -3.957498 | -46.270478 |
| C | -2.708721 | -3.223470 | -46.270452 |
| C | -4.145882 | -0.734072 | -46.270449 |
| C | -4.145882 | 0.734071  | -46.270449 |
| C | -2.708721 | 3.223468  | -46.270452 |
| C | -1.437240 | 3.957497  | -46.270479 |
| C | 3.185855  | 2.677864  | -45.030098 |
| C | 3.911973  | 1.420103  | -45.030099 |
| C | 3.911973  | -1.420105 | -45.030099 |
| C | 3.185855  | -2.677866 | -45.030097 |
| C | 0.726154  | -4.097972 | -45.030130 |



|   |           |           |            |
|---|-----------|-----------|------------|
| C | -0.726154 | -4.097972 | -45.030130 |
| C | -3.185855 | -2.677866 | -45.030097 |
| C | -3.911973 | -1.420105 | -45.030099 |
| C | -3.911973 | 1.420103  | -45.030099 |
| C | -3.185855 | 2.677864  | -45.030098 |
| C | -0.726154 | 4.097970  | -45.030130 |
| C | 0.726154  | 4.097970  | -45.030130 |
| C | 4.086560  | 0.714975  | -43.769403 |
| C | 4.086560  | -0.714977 | -43.769403 |
| C | 2.662489  | -3.181655 | -43.769408 |
| C | 1.424108  | -3.896643 | -43.769420 |
| C | -1.424108 | -3.896643 | -43.769420 |
| C | -2.662489 | -3.181655 | -43.769408 |
| C | -4.086560 | -0.714977 | -43.769403 |
| C | -4.086560 | 0.714975  | -43.769403 |
| C | -2.662489 | 3.181654  | -43.769408 |
| C | -1.424108 | 3.896641  | -43.769420 |
| C | 1.424108  | 3.896641  | -43.769420 |
| C | 2.662489  | 3.181654  | -43.769408 |
| C | 3.913868  | -1.424817 | -42.514834 |
| C | 3.190870  | -2.677159 | -42.514836 |
| C | 0.723027  | -4.101980 | -42.514841 |
| C | -0.723027 | -4.101980 | -42.514841 |
| C | -3.190870 | -2.677159 | -42.514836 |
| C | -3.913868 | -1.424817 | -42.514834 |
| C | -3.913868 | 1.424816  | -42.514834 |
| C | -3.190870 | 2.677158  | -42.514837 |
| C | -0.723027 | 4.101979  | -42.514841 |
| C | 0.723027  | 4.101979  | -42.514841 |
| C | 3.190870  | 2.677158  | -42.514837 |
| C | 3.913867  | 1.424816  | -42.514834 |
| C | 2.682044  | -3.195419 | -41.270939 |
| C | 1.426265  | -3.920441 | -41.270943 |
| C | -1.426265 | -3.920441 | -41.270943 |
| C | -2.682044 | -3.195419 | -41.270939 |
| C | -4.108252 | -0.725023 | -41.270940 |
| C | -4.108252 | 0.725022  | -41.270940 |
| C | -2.682044 | 3.195418  | -41.270940 |
| C | -1.426265 | 3.920439  | -41.270943 |
| C | 1.426265  | 3.920439  | -41.270943 |
| C | 2.682044  | 3.195418  | -41.270940 |
| C | 4.108252  | 0.725022  | -41.270940 |
| C | 4.108252  | -0.725023 | -41.270940 |
| C | 0.719118  | -4.102639 | -40.019077 |
| C | -0.719118 | -4.102639 | -40.019077 |
| C | -3.193412 | -2.674106 | -40.019076 |
| C | -3.912499 | -1.428533 | -40.019076 |
| C | -3.912499 | 1.428532  | -40.019076 |
| C | -3.193412 | 2.674105  | -40.019076 |
| C | -0.719118 | 4.102638  | -40.019078 |
| C | 0.719118  | 4.102638  | -40.019078 |
| C | 3.193412  | 2.674105  | -40.019076 |
| C | 3.912499  | 1.428532  | -40.019076 |
| C | 3.912499  | -1.428533 | -40.019076 |
| C | 3.193412  | -2.674106 | -40.019076 |
| C | -1.427491 | -3.916901 | -38.764226 |
| C | -2.678372 | -3.194714 | -38.764225 |
| C | -4.105812 | -0.722192 | -38.764225 |
| C | -4.105812 | 0.722191  | -38.764225 |
| C | -2.678372 | 3.194713  | -38.764226 |
| C | -1.427491 | 3.916900  | -38.764226 |
| C | 1.427491  | 3.916900  | -38.764226 |
| C | 2.678372  | 3.194713  | -38.764226 |
| C | 4.105812  | 0.722191  | -38.764225 |
| C | 4.105812  | -0.722192 | -38.764225 |
| C | 2.678372  | -3.194714 | -38.764225 |
| C | 1.427491  | -3.916901 | -38.764226 |
| C | -3.196134 | -2.682569 | -37.517776 |
| C | -3.921191 | -1.426662 | -37.517777 |
| C | -3.921191 | 1.426661  | -37.517777 |

|   |           |           |            |
|---|-----------|-----------|------------|
| C | -3.196134 | 2.682568  | -37.517776 |
| C | -0.725086 | 4.109214  | -37.517775 |
| C | 0.725086  | 4.109214  | -37.517775 |
| C | 3.196134  | 2.682568  | -37.517776 |
| C | 3.921191  | 1.426661  | -37.517777 |
| C | 3.921191  | -1.426662 | -37.517777 |
| C | 3.196134  | -2.682569 | -37.517776 |
| C | 0.725086  | -4.109215 | -37.517775 |
| C | -0.725086 | -4.109215 | -37.517775 |
| C | -4.103430 | -0.720388 | -36.268195 |
| C | -4.103430 | 0.720388  | -36.268195 |
| C | -2.675615 | 3.193540  | -36.268191 |
| C | -1.427855 | 3.913920  | -36.268191 |
| C | 1.427855  | 3.913920  | -36.268191 |
| C | 2.675615  | 3.193540  | -36.268191 |
| C | 4.103430  | 0.720388  | -36.268195 |
| C | 4.103430  | -0.720388 | -36.268195 |
| C | 2.675615  | -3.193541 | -36.268191 |
| C | 1.427855  | -3.913921 | -36.268190 |
| C | -1.427855 | -3.913921 | -36.268190 |
| C | -2.675615 | -3.193541 | -36.268191 |
| C | -3.914932 | 1.427529  | -35.013356 |
| C | -3.193761 | 2.676698  | -35.013355 |
| C | -0.721196 | 4.104214  | -35.013351 |
| C | 0.721196  | 4.104214  | -35.013351 |
| C | 3.193761  | 2.676698  | -35.013355 |
| C | 3.914932  | 1.427529  | -35.013356 |
| C | 3.914932  | -1.427530 | -35.013356 |
| C | 3.193761  | -2.676699 | -35.013355 |
| C | 0.721196  | -4.104215 | -35.013351 |
| C | -0.721196 | -4.104215 | -35.013351 |
| C | -3.193761 | -2.676699 | -35.013355 |
| C | -3.914932 | -1.427530 | -35.013356 |
| C | -2.682017 | 3.195828  | -33.765124 |
| C | -1.426647 | 3.920598  | -33.765123 |
| C | 1.426647  | 3.920598  | -33.765123 |
| C | 2.682017  | 3.195828  | -33.765124 |
| C | 4.108621  | 0.724782  | -33.765126 |
| C | 4.108621  | -0.724782 | -33.765126 |
| C | 2.682018  | -3.195828 | -33.765124 |
| C | 1.426647  | -3.920598 | -33.765123 |
| C | -1.426647 | -3.920598 | -33.765123 |
| C | -2.682017 | -3.195828 | -33.765124 |
| C | -4.108621 | -0.724782 | -33.765126 |
| C | -4.108621 | 0.724782  | -33.765126 |
| C | -0.721358 | 4.104606  | -32.516832 |
| C | 0.721358  | 4.104606  | -32.516832 |
| C | 3.194028  | 2.677036  | -32.516832 |
| C | 3.915364  | 1.427589  | -32.516834 |
| C | 3.915364  | -1.427589 | -32.516833 |
| C | 3.194028  | -2.677036 | -32.516832 |
| C | 0.721358  | -4.104606 | -32.516831 |
| C | -0.721358 | -4.104606 | -32.516831 |
| C | -3.194028 | -2.677036 | -32.516832 |
| C | -3.915364 | -1.427589 | -32.516833 |
| C | -3.915364 | 1.427589  | -32.516834 |
| C | -3.194028 | 2.677036  | -32.516832 |
| C | 1.427709  | 3.914169  | -31.262483 |
| C | 2.675919  | 3.193536  | -31.262484 |
| C | 4.103595  | 0.720646  | -31.262485 |
| C | 4.103595  | -0.720646 | -31.262485 |
| C | 2.675919  | -3.193537 | -31.262484 |
| C | 1.427709  | -3.914169 | -31.262483 |
| C | -1.427708 | -3.914169 | -31.262483 |
| C | -2.675919 | -3.193537 | -31.262484 |
| C | -4.103595 | -0.720646 | -31.262485 |
| C | -4.103595 | 0.720646  | -31.262485 |
| C | -2.675919 | 3.193536  | -31.262484 |
| C | -1.427709 | 3.914169  | -31.262483 |
| C | 3.195600  | 2.681433  | -30.012770 |

|   |           |           |            |
|---|-----------|-----------|------------|
| C | 3.919959  | 1.426753  | -30.012771 |
| C | 3.919959  | -1.426753 | -30.012770 |
| C | 3.195600  | -2.681433 | -30.012769 |
| C | 0.724380  | -4.108159 | -30.012767 |
| C | -0.724380 | -4.108159 | -30.012767 |
| C | -3.195600 | -2.681433 | -30.012769 |
| C | -3.919959 | -1.426753 | -30.012770 |
| C | -3.919959 | 1.426753  | -30.012771 |
| C | -3.195600 | 2.681433  | -30.012770 |
| C | -0.724380 | 4.108159  | -30.012767 |
| C | 0.724380  | 4.108159  | -30.012767 |
| C | 4.105579  | 0.722192  | -28.765206 |
| C | 4.105579  | -0.722192 | -28.765206 |
| C | 2.678249  | -3.194476 | -28.765203 |
| C | 1.427361  | -3.916652 | -28.765202 |
| C | -1.427361 | -3.916652 | -28.765202 |
| C | -2.678249 | -3.194476 | -28.765203 |
| C | -4.105579 | -0.722192 | -28.765206 |
| C | -4.105579 | 0.722192  | -28.765206 |
| C | -2.678249 | 3.194475  | -28.765203 |
| C | -1.427361 | 3.916652  | -28.765202 |
| C | 1.427361  | 3.916652  | -28.765202 |
| C | 2.678249  | 3.194475  | -28.765203 |
| C | 3.913716  | -1.427793 | -27.511607 |
| C | 3.193383  | -2.675497 | -27.511606 |
| C | 0.720352  | -4.103268 | -27.511604 |
| C | -0.720352 | -4.103268 | -27.511604 |
| C | -3.193383 | -2.675497 | -27.511606 |
| C | -3.913716 | -1.427793 | -27.511607 |
| C | -3.913716 | 1.427793  | -27.511607 |
| C | -3.193383 | 2.675497  | -27.511606 |
| C | -0.720352 | 4.103268  | -27.511604 |
| C | 0.720352  | 4.103268  | -27.511604 |
| C | 3.193383  | 2.675497  | -27.511606 |
| C | 3.913716  | 1.427793  | -27.511607 |
| C | 2.680636  | -3.195292 | -26.260598 |
| C | 1.426879  | -3.919124 | -26.260597 |
| C | -1.426879 | -3.919124 | -26.260597 |
| C | -2.680636 | -3.195292 | -26.260598 |
| C | -4.107482 | -0.723849 | -26.260598 |
| C | -4.107482 | 0.723849  | -26.260598 |
| C | -2.680636 | 3.195292  | -26.260598 |
| C | -1.426879 | 3.919124  | -26.260597 |
| C | 1.426879  | 3.919124  | -26.260597 |
| C | 2.680636  | 3.195292  | -26.260598 |
| C | 4.107482  | 0.723849  | -26.260598 |
| C | 4.107482  | -0.723849 | -26.260598 |
| C | 0.722901  | -4.106415 | -25.013334 |
| C | -0.722901 | -4.106415 | -25.013334 |
| C | -3.194836 | -2.679280 | -25.013334 |
| C | -3.917719 | -1.427163 | -25.013335 |
| C | -3.917719 | 1.427163  | -25.013335 |
| C | -3.194836 | 2.679281  | -25.013334 |
| C | -0.722901 | 4.106415  | -25.013335 |
| C | 0.722901  | 4.106415  | -25.013335 |
| C | 3.194836  | 2.679280  | -25.013334 |
| C | 3.917719  | 1.427163  | -25.013335 |
| C | 3.917719  | -1.427163 | -25.013335 |
| C | 3.194836  | -2.679280 | -25.013334 |
| C | -1.427813 | -3.913623 | -23.760679 |
| C | -2.675402 | -3.193354 | -23.760679 |
| C | -4.103189 | -0.720286 | -23.760680 |
| C | -4.103189 | 0.720286  | -23.760680 |
| C | -2.675402 | 3.193354  | -23.760679 |
| C | -1.427813 | 3.913624  | -23.760679 |
| C | 1.427813  | 3.913624  | -23.760679 |
| C | 2.675402  | 3.193354  | -23.760679 |
| C | 4.103189  | 0.720286  | -23.760680 |
| C | 4.103189  | -0.720286 | -23.760680 |
| C | 2.675402  | -3.193354 | -23.760679 |

|   |           |           |            |
|---|-----------|-----------|------------|
| C | 1.427813  | -3.913623 | -23.760679 |
| C | -3.194937 | -2.679718 | -22.508600 |
| C | -3.918149 | -1.427032 | -22.508601 |
| C | -3.918149 | 1.427032  | -22.508601 |
| C | -3.194937 | 2.679718  | -22.508600 |
| C | -0.723230 | 4.106720  | -22.508599 |
| C | 0.723230  | 4.106720  | -22.508599 |
| C | 3.194937  | 2.679718  | -22.508600 |
| C | 3.918149  | 1.427032  | -22.508601 |
| C | 3.918149  | -1.427032 | -22.508601 |
| C | 3.194937  | -2.679718 | -22.508600 |
| C | 0.723230  | -4.106720 | -22.508599 |
| C | -0.723230 | -4.106720 | -22.508599 |
| C | -4.107071 | -0.723465 | -21.261267 |
| C | -4.107071 | 0.723465  | -21.261267 |
| C | -2.680098 | 3.195124  | -21.261266 |
| C | -1.427004 | 3.918572  | -21.261266 |
| C | 1.427004  | 3.918572  | -21.261266 |
| C | 2.680098  | 3.195124  | -21.261266 |
| C | 4.107071  | 0.723465  | -21.261267 |
| C | 4.107071  | -0.723465 | -21.261267 |
| C | 2.680098  | -3.195124 | -21.261266 |
| C | 1.427004  | -3.918572 | -21.261266 |
| C | -1.427004 | -3.918572 | -21.261266 |
| C | -2.680098 | -3.195124 | -21.261266 |
| C | -3.913844 | 1.427776  | -20.009666 |
| C | -3.193432 | 2.675612  | -20.009666 |
| C | -0.720429 | 4.103363  | -20.009666 |
| C | 0.720429  | 4.103363  | -20.009666 |
| C | 3.193432  | 2.675612  | -20.009666 |
| C | 3.913844  | 1.427776  | -20.009666 |
| C | 3.913844  | -1.427776 | -20.009666 |
| C | 3.193432  | -2.675612 | -20.009666 |
| C | 0.720429  | -4.103363 | -20.009666 |
| C | -0.720429 | -4.103363 | -20.009666 |
| C | -3.193432 | -2.675612 | -20.009666 |
| C | -3.913844 | -1.427776 | -20.009666 |
| C | -2.678747 | 3.194570  | -18.756784 |
| C | -1.427198 | 3.917126  | -18.756784 |
| C | 1.427198  | 3.917126  | -18.756784 |
| C | 2.678747  | 3.194570  | -18.756784 |
| C | 4.105916  | 0.722574  | -18.756783 |
| C | 4.105916  | -0.722573 | -18.756783 |
| C | 2.678747  | -3.194570 | -18.756784 |
| C | 1.427198  | -3.917125 | -18.756784 |
| C | -1.427198 | -3.917125 | -18.756784 |
| C | -2.678747 | -3.194570 | -18.756784 |
| C | -4.105916 | -0.722573 | -18.756783 |
| C | -4.105916 | 0.722574  | -18.756783 |
| C | -0.723856 | 4.107522  | -17.509050 |
| C | 0.723856  | 4.107522  | -17.509050 |
| C | 3.195320  | 2.680662  | -17.509049 |
| C | 3.919158  | 1.426892  | -17.509049 |
| C | 3.919158  | -1.426891 | -17.509049 |
| C | 3.195320  | -2.680661 | -17.509049 |
| C | 0.723856  | -4.107521 | -17.509050 |
| C | -0.723856 | -4.107521 | -17.509050 |
| C | -3.195320 | -2.680661 | -17.509049 |
| C | -3.919158 | -1.426891 | -17.509049 |
| C | -3.919158 | 1.426892  | -17.509049 |
| C | -3.195320 | 2.680662  | -17.509049 |
| C | 1.427690  | 3.914343  | -16.258525 |
| C | 2.676088  | 3.193606  | -16.258526 |
| C | 4.103752  | 0.720754  | -16.258526 |
| C | 4.103752  | -0.720753 | -16.258526 |
| C | 2.676088  | -3.193606 | -16.258525 |
| C | 1.427690  | -3.914342 | -16.258525 |
| C | -1.427690 | -3.914342 | -16.258525 |
| C | -2.676088 | -3.193606 | -16.258525 |
| C | -4.103752 | -0.720753 | -16.258526 |

|   |           |           |            |
|---|-----------|-----------|------------|
| C | -4.103752 | 0.720754  | -16.258526 |
| C | -2.676088 | 3.193606  | -16.258526 |
| C | -1.427690 | 3.914343  | -16.258525 |
| C | 3.194218  | 2.677806  | -15.005152 |
| C | 3.916135  | 1.427362  | -15.005152 |
| C | 3.916135  | -1.427362 | -15.005152 |
| C | 3.194218  | -2.677805 | -15.005151 |
| C | 0.721935  | -4.105139 | -15.005150 |
| C | -0.721935 | -4.105139 | -15.005150 |
| C | -3.194218 | -2.677805 | -15.005151 |
| C | -3.916135 | -1.427362 | -15.005152 |
| C | -3.916135 | 1.427363  | -15.005152 |
| C | -3.194218 | 2.677806  | -15.005152 |
| C | -0.721935 | 4.105140  | -15.005150 |
| C | 0.721935  | 4.105140  | -15.005150 |
| C | 4.107742  | 0.724052  | -13.756743 |
| C | 4.107742  | -0.724051 | -13.756743 |
| C | 2.680941  | -3.195411 | -13.756742 |
| C | 1.426832  | -3.919445 | -13.756742 |
| C | -1.426832 | -3.919445 | -13.756742 |
| C | -2.680941 | -3.195411 | -13.756742 |
| C | -4.107742 | -0.724051 | -13.756743 |
| C | -4.107742 | 0.724052  | -13.756743 |
| C | -2.680941 | 3.195412  | -13.756742 |
| C | -1.426832 | 3.919446  | -13.756742 |
| C | 1.426832  | 3.919446  | -13.756742 |
| C | 2.680941  | 3.195412  | -13.756742 |
| C | 3.915063  | -1.427564 | -12.507224 |
| C | 3.193858  | -2.676774 | -12.507224 |
| C | 0.721222  | -4.104312 | -12.507225 |
| C | -0.721222 | -4.104312 | -12.507225 |
| C | -3.193858 | -2.676774 | -12.507224 |
| C | -3.915063 | -1.427564 | -12.507224 |
| C | -3.915063 | 1.427565  | -12.507224 |
| C | -3.193858 | 2.676775  | -12.507224 |
| C | -0.721222 | 4.104313  | -12.507225 |
| C | 0.721222  | 4.104313  | -12.507225 |
| C | 3.193858  | 2.676775  | -12.507224 |
| C | 3.915063  | 1.427565  | -12.507224 |
| C | 2.676974  | -3.193908 | -11.253690 |
| C | 1.427510  | -3.915260 | -11.253690 |
| C | -1.427510 | -3.915260 | -11.253690 |
| C | -2.676974 | -3.193908 | -11.253690 |
| C | -4.104457 | -0.721369 | -11.253689 |
| C | -4.104457 | 0.721370  | -11.253689 |
| C | -2.676974 | 3.193909  | -11.253690 |
| C | -1.427510 | 3.915261  | -11.253690 |
| C | 1.427510  | 3.915261  | -11.253690 |
| C | 2.676974  | 3.193909  | -11.253690 |
| C | 4.104457  | 0.721370  | -11.253689 |
| C | 4.104457  | -0.721369 | -11.253689 |
| C | 0.724044  | -4.107720 | -10.004408 |
| C | -0.724044 | -4.107720 | -10.004408 |
| C | -3.195397 | -2.680924 | -10.004408 |
| C | -3.919424 | -1.426827 | -10.004408 |
| C | -3.919424 | 1.426828  | -10.004408 |
| C | -3.195397 | 2.680925  | -10.004408 |
| C | -0.724044 | 4.107721  | -10.004408 |
| C | 0.724044  | 4.107721  | -10.004408 |
| C | 3.195397  | 2.680925  | -10.004408 |
| C | 3.919424  | 1.426828  | -10.004408 |
| C | 3.919424  | -1.426827 | -10.004408 |
| C | 3.195397  | -2.680924 | -10.004408 |
| C | -1.427415 | -3.915928 | -8.755735  |
| C | -2.677601 | -3.194160 | -8.755735  |
| C | -4.104988 | -0.721786 | -8.755736  |
| C | -4.104988 | 0.721787  | -8.755736  |
| C | -2.677601 | 3.194161  | -8.755735  |
| C | -1.427415 | 3.915929  | -8.755735  |
| C | 1.427415  | 3.915929  | -8.755735  |

|   |           |           |           |
|---|-----------|-----------|-----------|
| C | 2.677601  | 3.194161  | -8.755735 |
| C | 4.104988  | 0.721787  | -8.755736 |
| C | 4.104988  | -0.721786 | -8.755736 |
| C | 2.677601  | -3.194160 | -8.755735 |
| C | 1.427415  | -3.915928 | -8.755735 |
| C | -3.193668 | -2.676322 | -7.502372 |
| C | -3.914577 | -1.427626 | -7.502372 |
| C | -3.914577 | 1.427627  | -7.502372 |
| C | -3.193668 | 2.676323  | -7.502372 |
| C | -0.720926 | 4.103923  | -7.502371 |
| C | 0.720926  | 4.103923  | -7.502371 |
| C | 3.193668  | 2.676323  | -7.502372 |
| C | 3.914577  | 1.427627  | -7.502372 |
| C | 3.914577  | -1.427626 | -7.502372 |
| C | 3.193668  | -2.676322 | -7.502372 |
| C | 0.720926  | -4.103922 | -7.502371 |
| C | -0.720926 | -4.103922 | -7.502371 |
| C | -4.107469 | -0.723842 | -6.252109 |
| C | -4.107469 | 0.723843  | -6.252109 |
| C | -2.680624 | 3.195281  | -6.252109 |
| C | -1.426876 | 3.919106  | -6.252109 |
| C | 1.426876  | 3.919106  | -6.252109 |
| C | 2.680624  | 3.195281  | -6.252109 |
| C | 4.107469  | 0.723843  | -6.252109 |
| C | 4.107469  | -0.723842 | -6.252109 |
| C | 2.680624  | -3.195280 | -6.252109 |
| C | 1.426876  | -3.919105 | -6.252109 |
| C | -1.426876 | -3.919105 | -6.252109 |
| C | -2.680624 | -3.195280 | -6.252109 |
| C | -3.916856 | 1.427256  | -5.004046 |
| C | -3.194485 | 2.678485  | -5.004046 |
| C | -0.722389 | 4.105711  | -5.004047 |
| C | 0.722389  | 4.105711  | -5.004047 |
| C | 3.194485  | 2.678485  | -5.004046 |
| C | 3.916856  | 1.427255  | -5.004046 |
| C | 3.916856  | -1.427254 | -5.004046 |
| C | 3.194485  | -2.678484 | -5.004046 |
| C | 0.722389  | -4.105710 | -5.004047 |
| C | -0.722389 | -4.105710 | -5.004047 |
| C | -3.194485 | -2.678484 | -5.004046 |
| C | -3.916856 | -1.427254 | -5.004046 |
| C | -2.675908 | 3.193517  | -3.751159 |
| C | -1.427702 | 3.914142  | -3.751159 |
| C | 1.427702  | 3.914142  | -3.751159 |
| C | 2.675908  | 3.193517  | -3.751159 |
| C | 4.103584  | 0.720643  | -3.751158 |
| C | 4.103584  | -0.720642 | -3.751158 |
| C | 2.675908  | -3.193516 | -3.751158 |
| C | 1.427702  | -3.914141 | -3.751159 |
| C | -1.427702 | -3.914141 | -3.751159 |
| C | -2.675908 | -3.193516 | -3.751159 |
| C | -4.103584 | -0.720642 | -3.751158 |
| C | -4.103584 | 0.720643  | -3.751158 |
| C | -0.723472 | 4.107017  | -2.499903 |
| C | 0.723472  | 4.107017  | -2.499903 |
| C | 3.195074  | 2.680076  | -2.499904 |
| C | 3.918528  | 1.426972  | -2.499904 |
| C | 3.918528  | -1.426971 | -2.499904 |
| C | 3.195074  | -2.680075 | -2.499904 |
| C | 0.723472  | -4.107016 | -2.499903 |
| C | -0.723472 | -4.107016 | -2.499903 |
| C | -3.195074 | -2.680075 | -2.499904 |
| C | -3.918528 | -1.426970 | -2.499904 |
| C | -3.918528 | 1.426972  | -2.499904 |
| C | -3.195074 | 2.680077  | -2.499904 |
| C | 1.427102  | 3.917752  | -1.252160 |
| C | 2.679337  | 3.194800  | -1.252160 |
| C | 4.106410  | 0.722970  | -1.252161 |
| C | 4.106410  | -0.722969 | -1.252161 |
| C | 2.679337  | -3.194799 | -1.252160 |

|   |           |           |           |
|---|-----------|-----------|-----------|
| C | 1.427102  | -3.917751 | -1.252160 |
| C | -1.427102 | -3.917751 | -1.252160 |
| C | -2.679337 | -3.194799 | -1.252160 |
| C | -4.106410 | -0.722969 | -1.252161 |
| C | -4.106410 | 0.722970  | -1.252161 |
| C | -2.679337 | 3.194800  | -1.252160 |
| C | -1.427102 | 3.917752  | -1.252160 |
| C | 3.193464  | 2.675767  | 0.000000  |
| C | 3.913993  | 1.427728  | 0.000000  |
| C | 3.913993  | -1.427727 | 0.000000  |
| C | 3.193464  | -2.675765 | 0.000000  |
| C | 0.720546  | -4.103467 | 0.000000  |
| C | -0.720546 | -4.103467 | 0.000000  |
| C | -3.193464 | -2.675765 | 0.000000  |
| C | -3.913993 | -1.427727 | 0.000000  |
| C | -3.913993 | 1.427728  | 0.000000  |
| C | -3.193464 | 2.675767  | 0.000000  |
| C | -0.720546 | 4.103468  | 0.000000  |
| C | 0.720546  | 4.103468  | 0.000000  |
| C | 4.106410  | 0.722970  | 1.252161  |
| C | 4.106410  | -0.722969 | 1.252161  |
| C | 2.679337  | -3.194799 | 1.252160  |
| C | 1.427102  | -3.917751 | 1.252160  |
| C | -1.427102 | -3.917751 | 1.252160  |
| C | -2.679337 | -3.194799 | 1.252160  |
| C | -4.106410 | -0.722969 | 1.252161  |
| C | -4.106410 | 0.722970  | 1.252161  |
| C | -2.679337 | 3.194800  | 1.252160  |
| C | -1.427102 | 3.917752  | 1.252160  |
| C | 1.427102  | 3.917752  | 1.252160  |
| C | 2.679337  | 3.194800  | 1.252160  |
| C | 3.918528  | -1.426971 | 2.499904  |
| C | 3.195074  | -2.680075 | 2.499904  |
| C | 0.723472  | -4.107016 | 2.499903  |
| C | -0.723472 | -4.107016 | 2.499903  |
| C | -3.195074 | -2.680075 | 2.499904  |
| C | -3.918528 | -1.426970 | 2.499904  |
| C | -3.918528 | 1.426972  | 2.499904  |
| C | -3.195074 | 2.680076  | 2.499904  |
| C | -0.723472 | 4.107017  | 2.499903  |
| C | 0.723472  | 4.107017  | 2.499903  |
| C | 3.195074  | 2.680076  | 2.499904  |
| C | 3.918528  | 1.426972  | 2.499904  |
| C | 2.675908  | -3.193516 | 3.751159  |
| C | 1.427702  | -3.914141 | 3.751159  |
| C | -1.427702 | -3.914141 | 3.751159  |
| C | -2.675908 | -3.193516 | 3.751159  |
| C | -4.103584 | -0.720642 | 3.751158  |
| C | -4.103584 | 0.720643  | 3.751158  |
| C | -2.675908 | 3.193517  | 3.751159  |
| C | -1.427702 | 3.914142  | 3.751159  |
| C | 1.427702  | 3.914142  | 3.751159  |
| C | 2.675908  | 3.193517  | 3.751159  |
| C | 4.103584  | 0.720643  | 3.751158  |
| C | 4.103584  | -0.720642 | 3.751158  |
| C | 0.722389  | -4.105710 | 5.004047  |
| C | -0.722389 | -4.105710 | 5.004047  |
| C | -3.194485 | -2.678484 | 5.004046  |
| C | -3.916856 | -1.427254 | 5.004046  |
| C | -3.916856 | 1.427256  | 5.004046  |
| C | -3.194485 | 2.678485  | 5.004046  |
| C | -0.722389 | 4.105711  | 5.004047  |
| C | 0.722389  | 4.105711  | 5.004047  |
| C | 3.194485  | 2.678485  | 5.004046  |
| C | 3.916856  | 1.427256  | 5.004046  |
| C | 3.916856  | -1.427254 | 5.004046  |
| C | 3.194485  | -2.678484 | 5.004046  |
| C | -1.426876 | -3.919105 | 6.252109  |
| C | -2.680624 | -3.195280 | 6.252109  |
| C | -4.107469 | -0.723842 | 6.252109  |

|   |           |           |           |
|---|-----------|-----------|-----------|
| C | -4.107469 | 0.723843  | 6.252109  |
| C | -2.680624 | 3.195281  | 6.252109  |
| C | -1.426876 | 3.919106  | 6.252109  |
| C | 1.426876  | 3.919106  | 6.252109  |
| C | 2.680624  | 3.195281  | 6.252109  |
| C | 4.107469  | 0.723843  | 6.252109  |
| C | 4.107469  | -0.723842 | 6.252109  |
| C | 2.680624  | -3.195280 | 6.252109  |
| C | 1.426876  | -3.919105 | 6.252109  |
| C | -3.193668 | -2.676322 | 7.502372  |
| C | -3.914577 | -1.427626 | 7.502372  |
| C | -3.914577 | 1.427627  | 7.502372  |
| C | -3.193668 | 2.676323  | 7.502372  |
| C | -0.720926 | 4.103923  | 7.502371  |
| C | 0.720926  | 4.103923  | 7.502371  |
| C | 3.193668  | 2.676323  | 7.502372  |
| C | 3.914577  | 1.427627  | 7.502372  |
| C | 3.914577  | -1.427626 | 7.502372  |
| C | 3.193668  | -2.676322 | 7.502372  |
| C | 0.720926  | -4.103922 | 7.502371  |
| C | -0.720926 | -4.103922 | 7.502371  |
| C | -4.104988 | -0.721786 | 8.755736  |
| C | -4.104988 | 0.721787  | 8.755736  |
| C | -2.677601 | 3.194161  | 8.755735  |
| C | -1.427415 | 3.915929  | 8.755735  |
| C | 1.427415  | 3.915929  | 8.755735  |
| C | 2.677601  | 3.194161  | 8.755735  |
| C | 4.104988  | 0.721787  | 8.755736  |
| C | 4.104988  | -0.721786 | 8.755736  |
| C | 2.677601  | -3.194160 | 8.755735  |
| C | 1.427415  | -3.915928 | 8.755735  |
| C | -1.427415 | -3.915928 | 8.755735  |
| C | -2.677601 | -3.194160 | 8.755735  |
| C | -3.919424 | 1.426828  | 10.004408 |
| C | -3.195397 | 2.680925  | 10.004408 |
| C | -0.724044 | 4.107721  | 10.004408 |
| C | 0.724044  | 4.107721  | 10.004408 |
| C | 3.195397  | 2.680925  | 10.004408 |
| C | 3.919424  | 1.426828  | 10.004408 |
| C | 3.919424  | -1.426827 | 10.004408 |
| C | 3.195397  | -2.680924 | 10.004408 |
| C | 0.724044  | -4.107720 | 10.004408 |
| C | -0.724044 | -4.107720 | 10.004408 |
| C | -3.195397 | -2.680924 | 10.004408 |
| C | -3.919424 | -1.426827 | 10.004408 |
| C | -2.676974 | 3.193909  | 11.253690 |
| C | -1.427510 | 3.915261  | 11.253690 |
| C | 1.427510  | 3.915261  | 11.253690 |
| C | 2.676974  | 3.193909  | 11.253690 |
| C | 4.104457  | 0.721370  | 11.253689 |
| C | 4.104457  | -0.721369 | 11.253689 |
| C | 2.676974  | -3.193908 | 11.253690 |
| C | 1.427510  | -3.915260 | 11.253690 |
| C | -1.427510 | -3.915260 | 11.253690 |
| C | -2.676974 | -3.193908 | 11.253690 |
| C | -4.104457 | -0.721369 | 11.253689 |
| C | -4.104457 | 0.721370  | 11.253689 |
| C | -0.721222 | 4.104313  | 12.507225 |
| C | 0.721222  | 4.104313  | 12.507225 |
| C | 3.193858  | 2.676775  | 12.507224 |
| C | 3.915063  | 1.427565  | 12.507224 |
| C | 3.915063  | -1.427564 | 12.507224 |
| C | 3.193858  | -2.676774 | 12.507224 |
| C | 0.721222  | -4.104312 | 12.507225 |
| C | -0.721222 | -4.104312 | 12.507225 |
| C | -3.193858 | -2.676774 | 12.507224 |
| C | -3.915063 | -1.427564 | 12.507224 |
| C | -3.915063 | 1.427565  | 12.507224 |
| C | -3.193858 | 2.676775  | 12.507224 |
| C | 1.426832  | 3.919445  | 13.756742 |



|   |           |           |           |
|---|-----------|-----------|-----------|
| C | 2.680941  | 3.195412  | 13.756742 |
| C | 4.107742  | 0.724052  | 13.756743 |
| C | 4.107742  | -0.724051 | 13.756743 |
| C | 2.680941  | -3.195411 | 13.756742 |
| C | 1.426832  | -3.919445 | 13.756742 |
| C | -1.426832 | -3.919445 | 13.756742 |
| C | -2.680941 | -3.195411 | 13.756742 |
| C | -4.107742 | -0.724051 | 13.756743 |
| C | -4.107742 | 0.724052  | 13.756743 |
| C | -2.680941 | 3.195412  | 13.756742 |
| C | -1.426832 | 3.919446  | 13.756742 |
| C | 3.194218  | 2.677806  | 15.005152 |
| C | 3.916135  | 1.427362  | 15.005152 |
| C | 3.916135  | -1.427362 | 15.005152 |
| C | 3.194218  | -2.677805 | 15.005151 |
| C | 0.721935  | -4.105139 | 15.005150 |
| C | -0.721935 | -4.105139 | 15.005150 |
| C | -3.194218 | -2.677805 | 15.005151 |
| C | -3.916135 | -1.427362 | 15.005152 |
| C | -3.916135 | 1.427362  | 15.005152 |
| C | -3.194218 | 2.677806  | 15.005152 |
| C | -0.721935 | 4.105140  | 15.005150 |
| C | 0.721935  | 4.105140  | 15.005150 |
| C | 4.103752  | 0.720754  | 16.258526 |
| C | 4.103752  | -0.720753 | 16.258526 |
| C | 2.676088  | -3.193606 | 16.258525 |
| C | 1.427690  | -3.914342 | 16.258525 |
| C | -1.427690 | -3.914342 | 16.258525 |
| C | -2.676088 | -3.193606 | 16.258525 |
| C | -4.103752 | -0.720753 | 16.258526 |
| C | -4.103752 | 0.720754  | 16.258526 |
| C | -2.676088 | 3.193606  | 16.258526 |
| C | -1.427690 | 3.914343  | 16.258525 |
| C | 1.427690  | 3.914343  | 16.258525 |
| C | 2.676088  | 3.193606  | 16.258526 |
| C | 3.919158  | -1.426891 | 17.509049 |
| C | 3.195320  | -2.680661 | 17.509049 |
| C | 0.723856  | -4.107521 | 17.509050 |
| C | -0.723856 | -4.107521 | 17.509050 |
| C | -3.195320 | -2.680661 | 17.509049 |
| C | -3.919158 | -1.426891 | 17.509049 |
| C | -3.919158 | 1.426892  | 17.509049 |
| C | -3.195320 | 2.680662  | 17.509049 |
| C | -0.723856 | 4.107522  | 17.509050 |
| C | 0.723856  | 4.107522  | 17.509050 |
| C | 3.195319  | 2.680662  | 17.509049 |
| C | 3.919158  | 1.426892  | 17.509049 |
| C | 2.678747  | -3.194570 | 18.756784 |
| C | 1.427198  | -3.917125 | 18.756784 |
| C | -1.427198 | -3.917125 | 18.756784 |
| C | -2.678747 | -3.194570 | 18.756784 |
| C | -4.105916 | -0.722573 | 18.756783 |
| C | -4.105916 | 0.722574  | 18.756783 |
| C | -2.678747 | 3.194570  | 18.756784 |
| C | -1.427198 | 3.917126  | 18.756784 |
| C | 1.427198  | 3.917126  | 18.756784 |
| C | 2.678747  | 3.194570  | 18.756784 |
| C | 4.105916  | 0.722574  | 18.756783 |
| C | 4.105916  | -0.722573 | 18.756783 |
| C | 0.720429  | -4.103363 | 20.009666 |
| C | -0.720429 | -4.103363 | 20.009666 |
| C | -3.193432 | -2.675612 | 20.009666 |
| C | -3.913844 | -1.427776 | 20.009666 |
| C | -3.913844 | 1.427776  | 20.009666 |
| C | -3.193432 | 2.675612  | 20.009666 |
| C | -0.720429 | 4.103363  | 20.009666 |
| C | 0.720429  | 4.103363  | 20.009666 |
| C | 3.193432  | 2.675612  | 20.009666 |
| C | 3.913844  | 1.427776  | 20.009666 |
| C | 3.913844  | -1.427776 | 20.009666 |

|   |           |           |           |
|---|-----------|-----------|-----------|
| C | 3.193432  | -2.675612 | 20.009666 |
| C | -1.427004 | -3.918572 | 21.261266 |
| C | -2.680098 | -3.195124 | 21.261266 |
| C | -4.107071 | -0.723465 | 21.261267 |
| C | -4.107071 | 0.723465  | 21.261267 |
| C | -2.680098 | 3.195124  | 21.261266 |
| C | -1.427004 | 3.918572  | 21.261266 |
| C | 1.427004  | 3.918572  | 21.261266 |
| C | 2.680098  | 3.195124  | 21.261266 |
| C | 4.107071  | 0.723465  | 21.261267 |
| C | 4.107071  | -0.723465 | 21.261267 |
| C | 2.680098  | -3.195124 | 21.261266 |
| C | 1.427004  | -3.918572 | 21.261266 |
| C | -3.194937 | -2.679718 | 22.508600 |
| C | -3.918149 | -1.427032 | 22.508601 |
| C | -3.918149 | 1.427032  | 22.508601 |
| C | -3.194937 | 2.679718  | 22.508600 |
| C | -0.723230 | 4.106720  | 22.508599 |
| C | 0.723230  | 4.106720  | 22.508599 |
| C | 3.194937  | 2.679718  | 22.508600 |
| C | 3.918149  | 1.427032  | 22.508601 |
| C | 3.918149  | -1.427032 | 22.508601 |
| C | 3.194937  | -2.679718 | 22.508600 |
| C | 0.723230  | -4.106720 | 22.508599 |
| C | -0.723230 | -4.106720 | 22.508599 |
| C | -4.103189 | -0.720286 | 23.760680 |
| C | -4.103189 | 0.720286  | 23.760680 |
| C | -2.675402 | 3.193354  | 23.760679 |
| C | -1.427813 | 3.913624  | 23.760679 |
| C | 1.427813  | 3.913624  | 23.760679 |
| C | 2.675402  | 3.193354  | 23.760679 |
| C | 4.103189  | 0.720286  | 23.760680 |
| C | 4.103189  | -0.720286 | 23.760680 |
| C | 2.675402  | -3.193354 | 23.760679 |
| C | 1.427813  | -3.913623 | 23.760679 |
| C | -1.427813 | -3.913623 | 23.760679 |
| C | -2.675402 | -3.193354 | 23.760679 |
| C | -3.917719 | 1.427163  | 25.013335 |
| C | -3.194836 | 2.679281  | 25.013334 |
| C | -0.722901 | 4.106415  | 25.013335 |
| C | 0.722901  | 4.106415  | 25.013335 |
| C | 3.194836  | 2.679280  | 25.013334 |
| C | 3.917719  | 1.427163  | 25.013335 |
| C | 3.917719  | -1.427163 | 25.013335 |
| C | 3.194836  | -2.679280 | 25.013334 |
| C | 0.722901  | -4.106415 | 25.013334 |
| C | -0.722901 | -4.106415 | 25.013334 |
| C | -3.194836 | -2.679280 | 25.013334 |
| C | -3.917719 | -1.427163 | 25.013335 |
| C | -2.680636 | 3.195292  | 26.260598 |
| C | -1.426879 | 3.919124  | 26.260597 |
| C | 1.426879  | 3.919124  | 26.260597 |
| C | 2.680636  | 3.195292  | 26.260598 |
| C | 4.107482  | 0.723849  | 26.260598 |
| C | 4.107482  | -0.723849 | 26.260598 |
| C | 2.680636  | -3.195292 | 26.260598 |
| C | 1.426879  | -3.919124 | 26.260597 |
| C | -1.426879 | -3.919124 | 26.260597 |
| C | -2.680636 | -3.195292 | 26.260598 |
| C | -4.107482 | -0.723849 | 26.260598 |
| C | -4.107482 | 0.723849  | 26.260598 |
| C | -0.720352 | 4.103268  | 27.511604 |
| C | 0.720352  | 4.103268  | 27.511604 |
| C | 3.193383  | 2.675497  | 27.511606 |
| C | 3.913716  | 1.427793  | 27.511607 |
| C | 3.913716  | -1.427793 | 27.511607 |
| C | 3.193383  | -2.675497 | 27.511606 |
| C | 0.720352  | -4.103268 | 27.511604 |
| C | -0.720352 | -4.103268 | 27.511604 |
| C | -3.193383 | -2.675497 | 27.511606 |

|   |           |           |           |
|---|-----------|-----------|-----------|
| C | -3.913716 | -1.427793 | 27.511607 |
| C | -3.913716 | 1.427793  | 27.511607 |
| C | -3.193383 | 2.675497  | 27.511606 |
| C | 1.427361  | 3.916652  | 28.765202 |
| C | 2.678249  | 3.194475  | 28.765203 |
| C | 4.105579  | 0.722192  | 28.765206 |
| C | 4.105579  | -0.722192 | 28.765206 |
| C | 2.678249  | -3.194476 | 28.765203 |
| C | 1.427361  | -3.916652 | 28.765202 |
| C | -1.427361 | -3.916652 | 28.765202 |
| C | -2.678249 | -3.194476 | 28.765203 |
| C | -4.105579 | -0.722192 | 28.765206 |
| C | -4.105579 | 0.722192  | 28.765206 |
| C | -2.678249 | 3.194475  | 28.765203 |
| C | -1.427361 | 3.916652  | 28.765202 |
| C | 3.195600  | 2.681433  | 30.012770 |
| C | 3.919959  | 1.426753  | 30.012771 |
| C | 3.919959  | -1.426753 | 30.012770 |
| C | 3.195600  | -2.681433 | 30.012769 |
| C | 0.724380  | -4.108159 | 30.012767 |
| C | -0.724380 | -4.108159 | 30.012767 |
| C | -3.195600 | -2.681433 | 30.012769 |
| C | -3.919959 | -1.426753 | 30.012770 |
| C | -3.919959 | 1.426753  | 30.012771 |
| C | -3.195600 | 2.681433  | 30.012770 |
| C | -0.724380 | 4.108159  | 30.012767 |
| C | 0.724380  | 4.108159  | 30.012767 |
| C | 4.103595  | 0.720646  | 31.262485 |
| C | 4.103595  | -0.720646 | 31.262485 |
| C | 2.675919  | -3.193537 | 31.262484 |
| C | 1.427709  | -3.914169 | 31.262483 |
| C | -1.427708 | -3.914169 | 31.262483 |
| C | -2.675919 | -3.193537 | 31.262484 |
| C | -4.103595 | -0.720646 | 31.262485 |
| C | -4.103595 | 0.720646  | 31.262485 |
| C | -2.675919 | 3.193536  | 31.262484 |
| C | -1.427709 | 3.914169  | 31.262483 |
| C | 1.427709  | 3.914169  | 31.262483 |
| C | 2.675919  | 3.193536  | 31.262484 |
| C | 3.915364  | -1.427589 | 32.516833 |
| C | 3.194028  | -2.677036 | 32.516832 |
| C | 0.721358  | -4.104606 | 32.516831 |
| C | -0.721358 | -4.104606 | 32.516831 |
| C | -3.194028 | -2.677036 | 32.516832 |
| C | -3.915364 | -1.427589 | 32.516833 |
| C | -3.915364 | 1.427589  | 32.516834 |
| C | -3.194028 | 2.677036  | 32.516832 |
| C | -0.721358 | 4.104606  | 32.516832 |
| C | 0.721358  | 4.104606  | 32.516832 |
| C | 3.194028  | 2.677036  | 32.516832 |
| C | 3.915364  | 1.427589  | 32.516834 |
| C | 2.682018  | -3.195828 | 33.765124 |
| C | 1.426647  | -3.920598 | 33.765123 |
| C | -1.426647 | -3.920598 | 33.765123 |
| C | -2.682017 | -3.195828 | 33.765124 |
| C | -4.108621 | -0.724782 | 33.765126 |
| C | -4.108621 | 0.724782  | 33.765126 |
| C | -2.682017 | 3.195828  | 33.765124 |
| C | -1.426647 | 3.920598  | 33.765123 |
| C | 1.426647  | 3.920598  | 33.765123 |
| C | 2.682017  | 3.195828  | 33.765124 |
| C | 4.108621  | 0.724782  | 33.765126 |
| C | 4.108621  | -0.724782 | 33.765126 |
| C | 0.721196  | -4.104215 | 35.013351 |
| C | -0.721196 | -4.104215 | 35.013351 |
| C | -3.193761 | -2.676699 | 35.013355 |
| C | -3.914932 | -1.427530 | 35.013356 |
| C | -3.914932 | 1.427529  | 35.013356 |
| C | -3.193761 | 2.676698  | 35.013355 |
| C | -0.721196 | 4.104214  | 35.013351 |

|   |           |           |           |
|---|-----------|-----------|-----------|
| C | 0.721196  | 4.104214  | 35.013351 |
| C | 3.193761  | 2.676698  | 35.013355 |
| C | 3.914932  | 1.427529  | 35.013356 |
| C | 3.914932  | -1.427530 | 35.013356 |
| C | 3.193761  | -2.676699 | 35.013355 |
| C | -1.427855 | -3.913921 | 36.268190 |
| C | -2.675615 | -3.193541 | 36.268191 |
| C | -4.103430 | -0.720388 | 36.268195 |
| C | -4.103430 | 0.720388  | 36.268195 |
| C | -2.675615 | 3.193540  | 36.268191 |
| C | -1.427855 | 3.913920  | 36.268191 |
| C | 1.427855  | 3.913920  | 36.268191 |
| C | 2.675615  | 3.193540  | 36.268191 |
| C | 4.103430  | 0.720388  | 36.268195 |
| C | 4.103430  | -0.720388 | 36.268195 |
| C | 2.675615  | -3.193541 | 36.268191 |
| C | 1.427855  | -3.913921 | 36.268190 |
| C | -3.196134 | -2.682569 | 37.517776 |
| C | -3.921191 | -1.426662 | 37.517777 |
| C | -3.921191 | 1.426661  | 37.517777 |
| C | -3.196134 | 2.682568  | 37.517776 |
| C | -0.725086 | 4.109214  | 37.517775 |
| C | 0.725086  | 4.109214  | 37.517775 |
| C | 3.196134  | 2.682568  | 37.517776 |
| C | 3.921191  | 1.426661  | 37.517777 |
| C | 3.921191  | -1.426662 | 37.517777 |
| C | 3.196134  | -2.682569 | 37.517776 |
| C | 0.725086  | -4.109215 | 37.517775 |
| C | -0.725086 | -4.109215 | 37.517775 |
| C | -4.105812 | -0.722192 | 38.764225 |
| C | -4.105812 | 0.722191  | 38.764225 |
| C | -2.678372 | 3.194713  | 38.764226 |
| C | -1.427491 | 3.916900  | 38.764226 |
| C | 1.427491  | 3.916900  | 38.764226 |
| C | 2.678372  | 3.194713  | 38.764226 |
| C | 4.105812  | 0.722191  | 38.764225 |
| C | 4.105812  | -0.722192 | 38.764225 |
| C | 2.678372  | -3.194714 | 38.764225 |
| C | 1.427491  | -3.916901 | 38.764226 |
| C | -1.427491 | -3.916901 | 38.764226 |
| C | -2.678372 | -3.194714 | 38.764225 |
| C | -3.912499 | 1.428532  | 40.019076 |
| C | -3.193412 | 2.674105  | 40.019076 |
| C | -0.719118 | 4.102638  | 40.019078 |
| C | 0.719118  | 4.102638  | 40.019078 |
| C | 3.193412  | 2.674105  | 40.019076 |
| C | 3.912499  | 1.428532  | 40.019076 |
| C | 3.912499  | -1.428533 | 40.019076 |
| C | 3.193412  | -2.674106 | 40.019076 |
| C | 0.719118  | -4.102639 | 40.019077 |
| C | -0.719118 | -4.102639 | 40.019077 |
| C | -3.193412 | -2.674106 | 40.019076 |
| C | -3.912499 | -1.428533 | 40.019076 |
| C | -2.682044 | 3.195418  | 41.270940 |
| C | -1.426265 | 3.920439  | 41.270943 |
| C | 1.426265  | 3.920439  | 41.270943 |
| C | 2.682044  | 3.195418  | 41.270940 |
| C | 4.108252  | 0.725022  | 41.270940 |
| C | 4.108252  | -0.725023 | 41.270940 |
| C | 2.682044  | -3.195419 | 41.270939 |
| C | 1.426265  | -3.920441 | 41.270943 |
| C | -1.426265 | -3.920441 | 41.270943 |
| C | -2.682044 | -3.195419 | 41.270939 |
| C | -4.108252 | -0.725023 | 41.270940 |
| C | -4.108252 | 0.725022  | 41.270940 |
| C | -0.723027 | 4.101979  | 42.514841 |
| C | 0.723027  | 4.101979  | 42.514841 |
| C | 3.190870  | 2.677158  | 42.514837 |
| C | 3.913868  | 1.424816  | 42.514834 |
| C | 3.913868  | -1.424817 | 42.514834 |

|   |           |           |            |
|---|-----------|-----------|------------|
| C | 3.190870  | -2.677159 | 42.514836  |
| C | 0.723027  | -4.101980 | 42.514841  |
| C | -0.723027 | -4.101980 | 42.514841  |
| C | -3.190870 | -2.677159 | 42.514836  |
| C | -3.913867 | -1.424817 | 42.514834  |
| C | -3.913868 | 1.424816  | 42.514834  |
| C | -3.190870 | 2.677158  | 42.514837  |
| C | 1.424108  | 3.896641  | 43.769420  |
| C | 2.662489  | 3.181654  | 43.769408  |
| C | 4.086560  | 0.714975  | 43.769403  |
| C | 4.086560  | -0.714977 | 43.769403  |
| C | 2.662489  | -3.181655 | 43.769408  |
| C | 1.424108  | -3.896643 | 43.769420  |
| C | -1.424108 | -3.896643 | 43.769420  |
| C | -2.662489 | -3.181655 | 43.769408  |
| C | -4.086560 | -0.714977 | 43.769403  |
| C | -4.086560 | 0.714975  | 43.769403  |
| C | -2.662489 | 3.181654  | 43.769408  |
| C | -1.424108 | 3.896641  | 43.769420  |
| C | 3.185855  | 2.677864  | 45.030098  |
| C | 3.911973  | 1.420103  | 45.030099  |
| C | 3.911973  | -1.420105 | 45.030099  |
| C | 3.185855  | -2.677866 | 45.030097  |
| C | 0.726154  | -4.097972 | 45.030130  |
| C | -0.726154 | -4.097972 | 45.030130  |
| C | -3.185855 | -2.677866 | 45.030097  |
| C | -3.911973 | -1.420105 | 45.030099  |
| C | -3.911973 | 1.420103  | 45.030099  |
| C | -3.185855 | 2.677864  | 45.030098  |
| C | -0.726154 | 4.097970  | 45.030130  |
| C | 0.726154  | 4.097970  | 45.030130  |
| C | 4.145882  | 0.734071  | 46.270449  |
| C | 4.145882  | -0.734072 | 46.270449  |
| C | 2.708721  | -3.223470 | 46.270452  |
| C | 1.437240  | -3.957498 | 46.270479  |
| C | -1.437240 | -3.957498 | 46.270479  |
| C | -2.708721 | -3.223470 | 46.270452  |
| C | -4.145882 | -0.734072 | 46.270449  |
| C | -4.145882 | 0.734071  | 46.270449  |
| C | -2.708721 | 3.223468  | 46.270452  |
| C | -1.437240 | 3.957497  | 46.270479  |
| C | 1.437240  | 3.957497  | 46.270479  |
| C | 2.708721  | 3.223468  | 46.270452  |
| C | 3.992827  | -1.506819 | 47.487018  |
| C | 3.301391  | -2.704491 | 47.487017  |
| C | 0.691466  | -4.211099 | 47.487078  |
| C | -0.691466 | -4.211099 | 47.487078  |
| C | -3.301391 | -2.704491 | 47.487017  |
| C | -3.992827 | -1.506819 | 47.487018  |
| C | -3.992827 | 1.506818  | 47.487018  |
| C | -3.301391 | 2.704490  | 47.487017  |
| C | -0.691466 | 4.211097  | 47.487079  |
| C | 0.691466  | 4.211097  | 47.487079  |
| C | 3.301391  | 2.704490  | 47.487017  |
| C | 3.992827  | 1.506818  | 47.487018  |
| H | -1.227223 | 4.276659  | -48.442959 |
| H | 1.227223  | 4.276659  | -48.442959 |
| H | 3.090438  | 3.201336  | -48.442887 |
| H | 4.317632  | 1.075705  | -48.442887 |
| H | 4.317632  | -1.075707 | -48.442887 |
| H | 3.090438  | -3.201338 | -48.442887 |
| H | 1.227223  | -4.276660 | -48.442959 |
| H | -1.227223 | -4.276660 | -48.442959 |
| H | -3.090438 | -3.201337 | -48.442887 |
| H | -4.317632 | -1.075707 | -48.442887 |
| H | -4.317632 | 1.075705  | -48.442887 |
| H | -3.090438 | 3.201336  | -48.442887 |
| H | 4.317632  | -1.075707 | 48.442887  |
| H | 3.090438  | -3.201338 | 48.442887  |
| H | 1.227223  | -4.276660 | 48.442959  |

|   |           |           |           |
|---|-----------|-----------|-----------|
| H | -1.227223 | -4.276660 | 48.442959 |
| H | -3.090438 | -3.201337 | 48.442887 |
| H | -4.317632 | -1.075707 | 48.442887 |
| H | -4.317632 | 1.075705  | 48.442887 |
| H | -3.090438 | 3.201336  | 48.442887 |
| H | -1.227223 | 4.276659  | 48.442959 |
| H | 1.227223  | 4.276659  | 48.442959 |
| H | 3.090438  | 3.201336  | 48.442887 |
| H | 4.317632  | 1.075705  | 48.442887 |

Nanotube (6,6) u39v0s  
B3LYP/STO-3G Energy: -35252.513613

|   |           |           |            |
|---|-----------|-----------|------------|
| 6 | -4.248860 | 0.421554  | -48.093995 |
| 6 | -3.890439 | 1.759339  | -48.093993 |
| 6 | -1.759339 | 3.890439  | -48.093993 |
| 6 | -0.421554 | 4.248860  | -48.093995 |
| 6 | 2.489652  | 3.468970  | -48.093960 |
| 6 | 3.468970  | 2.489652  | -48.093960 |
| 6 | 4.248860  | -0.421554 | -48.093995 |
| 6 | 3.890439  | -1.759339 | -48.093993 |
| 6 | 1.759339  | -3.890439 | -48.093993 |
| 6 | 0.421554  | -4.248860 | -48.093995 |
| 6 | -2.489652 | -3.468970 | -48.093960 |
| 6 | -3.468970 | -2.489652 | -48.093960 |
| 6 | -3.453854 | 2.413435  | -46.879571 |
| 6 | -2.413435 | 3.453854  | -46.879571 |
| 6 | 0.363178  | 4.197800  | -46.879571 |
| 6 | 1.784434  | 3.817030  | -46.879548 |
| 6 | 3.817030  | 1.784434  | -46.879548 |
| 6 | 4.197800  | 0.363178  | -46.879571 |
| 6 | 3.453854  | -2.413435 | -46.879571 |
| 6 | 2.413435  | -3.453854 | -46.879571 |
| 6 | -0.363179 | -4.197800 | -46.879571 |
| 6 | -1.784434 | -3.817030 | -46.879548 |
| 6 | -3.817030 | -1.784434 | -46.879548 |
| 6 | -4.197800 | -0.363179 | -46.879571 |
| 6 | -1.761658 | 3.770422  | -45.639450 |
| 6 | -0.359553 | 4.146111  | -45.639453 |
| 6 | 2.384482  | 3.410889  | -45.639428 |
| 6 | 3.410889  | 2.384482  | -45.639428 |
| 6 | 4.146111  | -0.359553 | -45.639453 |
| 6 | 3.770422  | -1.761658 | -45.639450 |
| 6 | 1.761658  | -3.770422 | -45.639450 |
| 6 | 0.359553  | -4.146111 | -45.639453 |
| 6 | -2.384482 | -3.410889 | -45.639428 |
| 6 | -3.410889 | -2.384482 | -45.639428 |
| 6 | -4.146111 | 0.359553  | -45.639453 |
| 6 | -3.770422 | 1.761658  | -45.639450 |
| 6 | 0.366809  | 4.133662  | -44.377576 |
| 6 | 1.749163  | 3.763271  | -44.377566 |
| 6 | 3.763271  | 1.749163  | -44.377566 |
| 6 | 4.133662  | 0.366809  | -44.377576 |
| 6 | 3.396464  | -2.384516 | -44.377582 |
| 6 | 2.384516  | -3.396464 | -44.377582 |
| 6 | -0.366809 | -4.133662 | -44.377576 |
| 6 | -1.749163 | -3.763271 | -44.377566 |
| 6 | -3.763271 | -1.749163 | -44.377566 |
| 6 | -4.133662 | -0.366809 | -44.377576 |
| 6 | -3.396464 | 2.384516  | -44.377582 |
| 6 | -2.384516 | 3.396464  | -44.377582 |
| 6 | 2.389849  | 3.414742  | -43.125025 |
| 6 | 3.414742  | 2.389849  | -43.125025 |
| 6 | 4.152135  | -0.362288 | -43.125032 |
| 6 | 3.777013  | -1.762325 | -43.125035 |
| 6 | 1.762325  | -3.777013 | -43.125035 |
| 6 | 0.362288  | -4.152135 | -43.125032 |
| 6 | -2.389850 | -3.414743 | -43.125025 |

|   |           |           |            |
|---|-----------|-----------|------------|
| 6 | -3.414743 | -2.389850 | -43.125025 |
| 6 | -4.152135 | 0.362288  | -43.125032 |
| 6 | -3.777013 | 1.762325  | -43.125035 |
| 6 | -1.762325 | 3.777013  | -43.125035 |
| 6 | -0.362288 | 4.152135  | -43.125032 |
| 6 | 3.780841  | 1.763283  | -41.881838 |
| 6 | 4.155929  | 0.363367  | -41.881841 |
| 6 | 3.417496  | -2.392692 | -41.881845 |
| 6 | 2.392692  | -3.417496 | -41.881845 |
| 6 | -0.363367 | -4.155929 | -41.881841 |
| 6 | -1.763283 | -3.780842 | -41.881838 |
| 6 | -3.780842 | -1.763283 | -41.881838 |
| 6 | -4.155929 | -0.363367 | -41.881841 |
| 6 | -3.417496 | 2.392692  | -41.881845 |
| 6 | -2.392692 | 3.417496  | -41.881845 |
| 6 | 0.363367  | 4.155929  | -41.881841 |
| 6 | 1.763283  | 3.780841  | -41.881838 |
| 6 | 4.149870  | -0.367169 | -40.628315 |
| 6 | 3.777499  | -1.756971 | -40.628317 |
| 6 | 1.756970  | -3.777499 | -40.628317 |
| 6 | 0.367169  | -4.149870 | -40.628315 |
| 6 | -2.392943 | -3.410339 | -40.628311 |
| 6 | -3.410339 | -2.392943 | -40.628311 |
| 6 | -4.149870 | 0.367169  | -40.628315 |
| 6 | -3.777499 | 1.756970  | -40.628317 |
| 6 | -1.756971 | 3.777499  | -40.628317 |
| 6 | -0.367169 | 4.149870  | -40.628315 |
| 6 | 2.392942  | 3.410339  | -40.628311 |
| 6 | 3.410339  | 2.392942  | -40.628311 |
| 6 | 3.417428  | -2.393313 | -39.375327 |
| 6 | 2.393313  | -3.417429 | -39.375327 |
| 6 | -0.363935 | -4.156174 | -39.375324 |
| 6 | -1.762912 | -3.781340 | -39.375322 |
| 6 | -3.781340 | -1.762912 | -39.375322 |
| 6 | -4.156174 | -0.363935 | -39.375324 |
| 6 | -3.417429 | 2.393313  | -39.375327 |
| 6 | -2.393313 | 3.417428  | -39.375327 |
| 6 | 0.363935  | 4.156174  | -39.375324 |
| 6 | 1.762912  | 3.781340  | -39.375322 |
| 6 | 3.781340  | 1.762912  | -39.375322 |
| 6 | 4.156174  | 0.363935  | -39.375324 |
| 6 | 1.763772  | -3.781833 | -38.130262 |
| 6 | 0.363450  | -4.157021 | -38.130261 |
| 6 | -2.393297 | -3.418397 | -38.130259 |
| 6 | -3.418397 | -2.393297 | -38.130259 |
| 6 | -4.157021 | 0.363450  | -38.130261 |
| 6 | -3.781833 | 1.763772  | -38.130262 |
| 6 | -1.763772 | 3.781833  | -38.130262 |
| 6 | -0.363450 | 4.157021  | -38.130261 |
| 6 | 2.393297  | 3.418397  | -38.130259 |
| 6 | 3.418397  | 2.393297  | -38.130259 |
| 6 | 4.157021  | -0.363450 | -38.130261 |
| 6 | 3.781833  | -1.763772 | -38.130262 |
| 6 | -0.366426 | -4.150379 | -36.878611 |
| 6 | -1.757854 | -3.777566 | -36.878610 |
| 6 | -3.777566 | -1.757854 | -36.878610 |
| 6 | -4.150379 | -0.366426 | -36.878611 |
| 6 | -3.411159 | 2.392570  | -36.878612 |
| 6 | -2.392570 | 3.411159  | -36.878612 |
| 6 | 0.366426  | 4.150379  | -36.878611 |
| 6 | 1.757854  | 3.777566  | -36.878610 |
| 6 | 3.777566  | 1.757854  | -36.878610 |
| 6 | 4.150379  | 0.366426  | -36.878611 |
| 6 | 3.411159  | -2.392570 | -36.878612 |
| 6 | 2.392570  | -3.411159 | -36.878612 |
| 6 | -2.392865 | -3.415842 | -35.625262 |
| 6 | -3.415842 | -2.392865 | -35.625262 |
| 6 | -4.154593 | 0.364351  | -35.625262 |
| 6 | -3.780180 | 1.761775  | -35.625262 |
| 6 | -1.761775 | 3.780180  | -35.625262 |

|   |           |           |            |
|---|-----------|-----------|------------|
| 6 | -0.364351 | 4.154593  | -35.625262 |
| 6 | 2.392864  | 3.415842  | -35.625262 |
| 6 | 3.415842  | 2.392864  | -35.625262 |
| 6 | 4.154593  | -0.364351 | -35.625262 |
| 6 | 3.780180  | -1.761775 | -35.625262 |
| 6 | 1.761775  | -3.780180 | -35.625262 |
| 6 | 0.364351  | -4.154593 | -35.625262 |
| 6 | -3.781653 | -1.763699 | -34.379159 |
| 6 | -4.156838 | -0.363412 | -34.379159 |
| 6 | -3.418265 | 2.393189  | -34.379159 |
| 6 | -2.393189 | 3.418265  | -34.379159 |
| 6 | 0.363412  | 4.156838  | -34.379159 |
| 6 | 1.763699  | 3.781652  | -34.379159 |
| 6 | 3.781652  | 1.763699  | -34.379159 |
| 6 | 4.156838  | 0.363412  | -34.379159 |
| 6 | 3.418264  | -2.393189 | -34.379159 |
| 6 | 2.393189  | -3.418265 | -34.379159 |
| 6 | -0.363412 | -4.156838 | -34.379159 |
| 6 | -1.763699 | -3.781652 | -34.379159 |
| 6 | -4.151111 | 0.366089  | -33.128602 |
| 6 | -3.778033 | 1.758525  | -33.128602 |
| 6 | -1.758525 | 3.778033  | -33.128602 |
| 6 | -0.366089 | 4.151111  | -33.128602 |
| 6 | 2.392629  | 3.411955  | -33.128602 |
| 6 | 3.411955  | 2.392629  | -33.128602 |
| 6 | 4.151111  | -0.366089 | -33.128602 |
| 6 | 3.778033  | -1.758525 | -33.128602 |
| 6 | 1.758525  | -3.778033 | -33.128602 |
| 6 | 0.366089  | -4.151111 | -33.128602 |
| 6 | -2.392629 | -3.411955 | -33.128602 |
| 6 | -3.411955 | -2.392629 | -33.128602 |
| 6 | -3.415152 | 2.392857  | -31.875159 |
| 6 | -2.392857 | 3.415152  | -31.875159 |
| 6 | 0.364681  | 4.153981  | -31.875159 |
| 6 | 1.761171  | 3.779813  | -31.875159 |
| 6 | 3.779813  | 1.761171  | -31.875159 |
| 6 | 4.153981  | 0.364681  | -31.875159 |
| 6 | 3.415152  | -2.392857 | -31.875159 |
| 6 | 2.392857  | -3.415152 | -31.875159 |
| 6 | -0.364681 | -4.153981 | -31.875159 |
| 6 | -1.761172 | -3.779813 | -31.875159 |
| 6 | -3.779813 | -1.761172 | -31.875159 |
| 6 | -4.153981 | -0.364681 | -31.875159 |
| 6 | -1.763730 | 3.781694  | -30.628309 |
| 6 | -0.363414 | 4.156883  | -30.628309 |
| 6 | 2.393202  | 3.418297  | -30.628309 |
| 6 | 3.418297  | 2.393202  | -30.628309 |
| 6 | 4.156883  | -0.363414 | -30.628309 |
| 6 | 3.781694  | -1.763730 | -30.628309 |
| 6 | 1.763729  | -3.781694 | -30.628309 |
| 6 | 0.363414  | -4.156883 | -30.628309 |
| 6 | -2.393202 | -3.418297 | -30.628309 |
| 6 | -3.418297 | -2.393202 | -30.628309 |
| 6 | -4.156883 | 0.363414  | -30.628309 |
| 6 | -3.781694 | 1.763729  | -30.628309 |
| 6 | 0.365817  | 4.151696  | -29.378524 |
| 6 | 1.759045  | 3.778402  | -29.378525 |
| 6 | 3.778402  | 1.759045  | -29.378525 |
| 6 | 4.151696  | 0.365817  | -29.378524 |
| 6 | 3.412603  | -2.392696 | -29.378524 |
| 6 | 2.392696  | -3.412603 | -29.378524 |
| 6 | -0.365817 | -4.151696 | -29.378524 |
| 6 | -1.759045 | -3.778402 | -29.378525 |
| 6 | -3.778402 | -1.759045 | -29.378525 |
| 6 | -4.151696 | -0.365817 | -29.378524 |
| 6 | -3.412603 | 2.392696  | -29.378524 |
| 6 | -2.392696 | 3.412603  | -29.378524 |
| 6 | 2.392814  | 3.414570  | -28.125066 |
| 6 | 3.414570  | 2.392814  | -28.125066 |
| 6 | 4.153463  | -0.364940 | -28.125065 |



|   |           |           |            |
|---|-----------|-----------|------------|
| 6 | 3.779495  | -1.760695 | -28.125065 |
| 6 | 1.760695  | -3.779495 | -28.125065 |
| 6 | 0.364940  | -4.153463 | -28.125065 |
| 6 | -2.392814 | -3.414570 | -28.125066 |
| 6 | -3.414570 | -2.392814 | -28.125066 |
| 6 | -4.153463 | 0.364940  | -28.125065 |
| 6 | -3.779495 | 1.760695  | -28.125065 |
| 6 | -1.760695 | 3.779495  | -28.125065 |
| 6 | -0.364940 | 4.153463  | -28.125065 |
| 6 | 3.781670  | 1.763703  | -26.877566 |
| 6 | 4.156853  | 0.363420  | -26.877566 |
| 6 | 3.418271  | -2.393199 | -26.877565 |
| 6 | 2.393199  | -3.418271 | -26.877565 |
| 6 | -0.363420 | -4.156853 | -26.877566 |
| 6 | -1.763703 | -3.781670 | -26.877566 |
| 6 | -3.781670 | -1.763703 | -26.877566 |
| 6 | -4.156853 | -0.363420 | -26.877566 |
| 6 | -3.418271 | 2.393199  | -26.877565 |
| 6 | -2.393199 | 3.418271  | -26.877565 |
| 6 | 0.363420  | 4.156853  | -26.877566 |
| 6 | 1.763703  | 3.781670  | -26.877566 |
| 6 | 4.152209  | -0.365579 | -25.628399 |
| 6 | 3.778729  | -1.759512 | -25.628399 |
| 6 | 1.759512  | -3.778729 | -25.628399 |
| 6 | 0.365579  | -4.152209 | -25.628399 |
| 6 | -2.392742 | -3.413164 | -25.628399 |
| 6 | -3.413164 | -2.392742 | -25.628399 |
| 6 | -4.152209 | 0.365579  | -25.628399 |
| 6 | -3.778729 | 1.759512  | -25.628399 |
| 6 | -1.759512 | 3.778729  | -25.628399 |
| 6 | -0.365579 | 4.152209  | -25.628399 |
| 6 | 2.392742  | 3.413164  | -25.628399 |
| 6 | 3.413164  | 2.392742  | -25.628399 |
| 6 | 3.414089  | -2.392783 | -24.374989 |
| 6 | 2.392783  | -3.414089 | -24.374989 |
| 6 | -0.365151 | -4.153027 | -24.374989 |
| 6 | -1.760291 | -3.779222 | -24.374989 |
| 6 | -3.779222 | -1.760291 | -24.374989 |
| 6 | -4.153027 | -0.365151 | -24.374989 |
| 6 | -3.414089 | 2.392783  | -24.374989 |
| 6 | -2.392783 | 3.414089  | -24.374989 |
| 6 | 0.365151  | 4.153027  | -24.374989 |
| 6 | 1.760291  | 3.779222  | -24.374989 |
| 6 | 3.779222  | 1.760291  | -24.374989 |
| 6 | 4.153027  | 0.365151  | -24.374989 |
| 6 | 1.763642  | -3.781625 | -23.126883 |
| 6 | 0.363452  | -4.156781 | -23.126883 |
| 6 | -2.393188 | -3.418191 | -23.126883 |
| 6 | -3.418191 | -2.393188 | -23.126883 |
| 6 | -4.156781 | 0.363452  | -23.126883 |
| 6 | -3.781625 | 1.763642  | -23.126883 |
| 6 | -1.763642 | 3.781625  | -23.126883 |
| 6 | -0.363452 | 4.156781  | -23.126883 |
| 6 | 2.393188  | 3.418191  | -23.126883 |
| 6 | 3.418191  | 2.393188  | -23.126883 |
| 6 | 4.156781  | -0.363452 | -23.126883 |
| 6 | 3.781625  | -1.763642 | -23.126883 |
| 6 | -0.365351 | -4.152696 | -21.878234 |
| 6 | -1.759952 | -3.779036 | -21.878234 |
| 6 | -3.779036 | -1.759952 | -21.878234 |
| 6 | -4.152696 | -0.365351 | -21.878234 |
| 6 | -3.413701 | 2.392790  | -21.878234 |
| 6 | -2.392790 | 3.413701  | -21.878234 |
| 6 | 0.365351  | 4.152696  | -21.878234 |
| 6 | 1.759952  | 3.779036  | -21.878234 |
| 6 | 3.779036  | 1.759952  | -21.878234 |
| 6 | 4.152696  | 0.365351  | -21.878234 |
| 6 | 3.413701  | -2.392790 | -21.878234 |
| 6 | 2.392790  | -3.413701 | -21.878234 |
| 6 | -2.392753 | -3.413677 | -20.624936 |

|   |           |           |            |
|---|-----------|-----------|------------|
| 6 | -3.413677 | -2.392753 | -20.624936 |
| 6 | -4.152658 | 0.365332  | -20.624935 |
| 6 | -3.778993 | 1.759950  | -20.624935 |
| 6 | -1.759950 | 3.778993  | -20.624935 |
| 6 | -0.365332 | 4.152658  | -20.624935 |
| 6 | 2.392753  | 3.413677  | -20.624936 |
| 6 | 3.413677  | 2.392753  | -20.624936 |
| 6 | 4.152658  | -0.365332 | -20.624935 |
| 6 | 3.778993  | -1.759950 | -20.624935 |
| 6 | 1.759950  | -3.778993 | -20.624935 |
| 6 | 0.365332  | -4.152658 | -20.624935 |
| 6 | -3.781547 | -1.763534 | -19.376245 |
| 6 | -4.156660 | -0.363506 | -19.376245 |
| 6 | -3.418060 | 2.393175  | -19.376244 |
| 6 | -2.393175 | 3.418060  | -19.376244 |
| 6 | 0.363506  | 4.156660  | -19.376245 |
| 6 | 1.763534  | 3.781547  | -19.376245 |
| 6 | 3.781547  | 1.763534  | -19.376245 |
| 6 | 4.156660  | 0.363506  | -19.376245 |
| 6 | 3.418060  | -2.393175 | -19.376244 |
| 6 | 2.393175  | -3.418060 | -19.376244 |
| 6 | -0.363506 | -4.156660 | -19.376245 |
| 6 | -1.763534 | -3.781547 | -19.376245 |
| 6 | -4.153170 | 0.365130  | -18.128030 |
| 6 | -3.779336 | 1.760381  | -18.128030 |
| 6 | -1.760381 | 3.779336  | -18.128030 |
| 6 | -0.365130 | 4.153170  | -18.128030 |
| 6 | 2.392835  | 3.414222  | -18.128030 |
| 6 | 3.414222  | 2.392835  | -18.128030 |
| 6 | 4.153170  | -0.365130 | -18.128030 |
| 6 | 3.779336  | -1.760381 | -18.128030 |
| 6 | 1.760381  | -3.779336 | -18.128030 |
| 6 | 0.365130  | -4.153170 | -18.128030 |
| 6 | -2.392835 | -3.414222 | -18.128030 |
| 6 | -3.414222 | -2.392835 | -18.128030 |
| 6 | -3.413334 | 2.392729  | -16.874906 |
| 6 | -2.392729 | 3.413334  | -16.874906 |
| 6 | 0.365482  | 4.152348  | -16.874906 |
| 6 | 1.759665  | 3.778800  | -16.874906 |
| 6 | 3.778800  | 1.759665  | -16.874906 |
| 6 | 4.152348  | 0.365482  | -16.874906 |
| 6 | 3.413334  | -2.392729 | -16.874906 |
| 6 | 2.392729  | -3.413334 | -16.874906 |
| 6 | -0.365482 | -4.152348 | -16.874906 |
| 6 | -1.759665 | -3.778800 | -16.874906 |
| 6 | -3.778800 | -1.759665 | -16.874906 |
| 6 | -4.152348 | -0.365482 | -16.874906 |
| 6 | -1.763381 | 3.781438  | -15.625643 |
| 6 | -0.363584 | 4.156489  | -15.625643 |
| 6 | 2.393157  | 3.417873  | -15.625643 |
| 6 | 3.417873  | 2.393157  | -15.625643 |
| 6 | 4.156489  | -0.363584 | -15.625643 |
| 6 | 3.781438  | -1.763381 | -15.625643 |
| 6 | 1.763381  | -3.781438 | -15.625643 |
| 6 | 0.363584  | -4.156489 | -15.625643 |
| 6 | -2.393157 | -3.417873 | -15.625643 |
| 6 | -3.417873 | -2.393157 | -15.625643 |
| 6 | -4.156489 | 0.363584  | -15.625643 |
| 6 | -3.781438 | 1.763381  | -15.625643 |
| 6 | 0.364914  | 4.153634  | -14.377786 |
| 6 | 1.760801  | 3.779629  | -14.377786 |
| 6 | 3.779629  | 1.760801  | -14.377786 |
| 6 | 4.153634  | 0.364914  | -14.377786 |
| 6 | 3.414733  | -2.392880 | -14.377786 |
| 6 | 2.392880  | -3.414732 | -14.377786 |
| 6 | -0.364914 | -4.153634 | -14.377786 |
| 6 | -1.760801 | -3.779629 | -14.377786 |
| 6 | -3.779629 | -1.760801 | -14.377786 |
| 6 | -4.153634 | -0.364914 | -14.377786 |
| 6 | -3.414732 | 2.392880  | -14.377786 |

|   |           |           |            |
|---|-----------|-----------|------------|
| 6 | -2.392880 | 3.414733  | -14.377786 |
| 6 | 2.392709  | 3.413056  | -13.124900 |
| 6 | 3.413056  | 2.392709  | -13.124900 |
| 6 | 4.152097  | -0.365604 | -13.124899 |
| 6 | 3.778644  | -1.759434 | -13.124899 |
| 6 | 1.759434  | -3.778644 | -13.124899 |
| 6 | 0.365604  | -4.152097 | -13.124899 |
| 6 | -2.392709 | -3.413056 | -13.124900 |
| 6 | -3.413056 | -2.392709 | -13.124900 |
| 6 | -4.152097 | 0.365604  | -13.124899 |
| 6 | -3.778644 | 1.759434  | -13.124899 |
| 6 | -1.759434 | 3.778644  | -13.124899 |
| 6 | -0.365604 | 4.152097  | -13.124899 |
| 6 | 3.781297  | 1.763182  | -11.875078 |
| 6 | 4.156267  | 0.363687  | -11.875078 |
| 6 | 3.417629  | -2.393134 | -11.875078 |
| 6 | 2.393134  | -3.417629 | -11.875078 |
| 6 | -0.363686 | -4.156267 | -11.875078 |
| 6 | -1.763182 | -3.781297 | -11.875078 |
| 6 | -3.781297 | -1.763182 | -11.875078 |
| 6 | -4.156267 | -0.363686 | -11.875078 |
| 6 | -3.417629 | 2.393134  | -11.875078 |
| 6 | -2.393134 | 3.417629  | -11.875078 |
| 6 | 0.363687  | 4.156267  | -11.875078 |
| 6 | 1.763182  | 3.781297  | -11.875078 |
| 6 | 4.154086  | -0.364702 | -10.627501 |
| 6 | 3.779915  | -1.761210 | -10.627501 |
| 6 | 1.761210  | -3.779915 | -10.627501 |
| 6 | 0.364702  | -4.154086 | -10.627501 |
| 6 | -2.392923 | -3.415231 | -10.627500 |
| 6 | -3.415231 | -2.392923 | -10.627500 |
| 6 | -4.154086 | 0.364702  | -10.627501 |
| 6 | -3.779915 | 1.761210  | -10.627501 |
| 6 | -1.761210 | 3.779915  | -10.627501 |
| 6 | -0.364702 | 4.154086  | -10.627501 |
| 6 | 2.392923  | 3.415231  | -10.627500 |
| 6 | 3.415231  | 2.392923  | -10.627500 |
| 6 | 3.412845  | -2.392693 | -9.374913  |
| 6 | 2.392693  | -3.412844 | -9.374913  |
| 6 | -0.365696 | -4.151907 | -9.374913  |
| 6 | -1.759259 | -3.778525 | -9.374913  |
| 6 | -3.778525 | -1.759259 | -9.374913  |
| 6 | -4.151907 | -0.365696 | -9.374913  |
| 6 | -3.412844 | 2.392693  | -9.374913  |
| 6 | -2.392693 | 3.412845  | -9.374913  |
| 6 | 0.365696  | 4.151907  | -9.374913  |
| 6 | 1.759259  | 3.778525  | -9.374913  |
| 6 | 3.778525  | 1.759259  | -9.374913  |
| 6 | 4.151907  | 0.365696  | -9.374913  |
| 6 | 1.762938  | -3.781125 | -8.124548  |
| 6 | 0.363811  | -4.155997 | -8.124548  |
| 6 | -2.393107 | -3.417332 | -8.124549  |
| 6 | -3.417332 | -2.393107 | -8.124549  |
| 6 | -4.155997 | 0.363811  | -8.124548  |
| 6 | -3.781125 | 1.762938  | -8.124548  |
| 6 | -1.762938 | 3.781125  | -8.124548  |
| 6 | -0.363811 | 4.155997  | -8.124548  |
| 6 | 2.393107  | 3.417332  | -8.124549  |
| 6 | 3.417332  | 2.393107  | -8.124549  |
| 6 | 4.155997  | -0.363811 | -8.124549  |
| 6 | 3.781125  | -1.762938 | -8.124548  |
| 6 | -0.364498 | -4.154523 | -6.877173  |
| 6 | -1.761606 | -3.780191 | -6.877173  |
| 6 | -3.780191 | -1.761606 | -6.877173  |
| 6 | -4.154523 | -0.364498 | -6.877173  |
| 6 | -3.415711 | 2.392964  | -6.877173  |
| 6 | -2.392964 | 3.415711  | -6.877173  |
| 6 | 0.364498  | 4.154523  | -6.877173  |
| 6 | 1.761606  | 3.780191  | -6.877174  |
| 6 | 3.780191  | 1.761606  | -6.877174  |

|   |           |           |           |
|---|-----------|-----------|-----------|
| 6 | 4.154523  | 0.364498  | -6.877173 |
| 6 | 3.415711  | -2.392964 | -6.877173 |
| 6 | 2.392964  | -3.415711 | -6.877173 |
| 6 | -2.392683 | -3.412702 | -5.624941 |
| 6 | -3.412702 | -2.392683 | -5.624941 |
| 6 | -4.151779 | 0.365758  | -5.624941 |
| 6 | -3.778445 | 1.759141  | -5.624941 |
| 6 | -1.759141 | 3.778445  | -5.624941 |
| 6 | -0.365758 | 4.151779  | -5.624941 |
| 6 | 2.392683  | 3.412702  | -5.624941 |
| 6 | 3.412702  | 2.392683  | -5.624941 |
| 6 | 4.151779  | -0.365758 | -5.624941 |
| 6 | 3.778445  | -1.759141 | -5.624941 |
| 6 | 1.759141  | -3.778445 | -5.624941 |
| 6 | 0.365758  | -4.151779 | -5.624941 |
| 6 | -3.780925 | -1.762653 | -4.374057 |
| 6 | -4.155681 | -0.363957 | -4.374057 |
| 6 | -3.416986 | 2.393076  | -4.374058 |
| 6 | -2.393076 | 3.416986  | -4.374058 |
| 6 | 0.363958  | 4.155681  | -4.374057 |
| 6 | 1.762654  | 3.780925  | -4.374057 |
| 6 | 3.780925  | 1.762654  | -4.374057 |
| 6 | 4.155681  | 0.363958  | -4.374057 |
| 6 | 3.416986  | -2.393076 | -4.374058 |
| 6 | 2.393076  | -3.416986 | -4.374058 |
| 6 | -0.363957 | -4.155681 | -4.374057 |
| 6 | -1.762653 | -3.780925 | -4.374057 |
| 6 | -4.154938 | 0.364304  | -3.126804 |
| 6 | -3.780454 | 1.761982  | -3.126805 |
| 6 | -1.761982 | 3.780454  | -3.126805 |
| 6 | -0.364303 | 4.154938  | -3.126804 |
| 6 | 2.393004  | 3.416168  | -3.126804 |
| 6 | 3.416168  | 2.393004  | -3.126804 |
| 6 | 4.154938  | -0.364303 | -3.126804 |
| 6 | 3.780454  | -1.761982 | -3.126805 |
| 6 | 1.761982  | -3.780454 | -3.126805 |
| 6 | 0.364304  | -4.154938 | -3.126804 |
| 6 | -2.393004 | -3.416168 | -3.126804 |
| 6 | -3.416168 | -2.393004 | -3.126804 |
| 6 | -3.412631 | 2.392677  | -1.874979 |
| 6 | -2.392677 | 3.412631  | -1.874979 |
| 6 | 0.365789  | 4.151714  | -1.874979 |
| 6 | 1.759082  | 3.778405  | -1.874979 |
| 6 | 3.778405  | 1.759082  | -1.874979 |
| 6 | 4.151714  | 0.365789  | -1.874979 |
| 6 | 3.412631  | -2.392677 | -1.874979 |
| 6 | 2.392677  | -3.412631 | -1.874979 |
| 6 | -0.365789 | -4.151714 | -1.874979 |
| 6 | -1.759082 | -3.778405 | -1.874979 |
| 6 | -3.778405 | -1.759082 | -1.874979 |
| 6 | -4.151714 | -0.365789 | -1.874979 |
| 6 | -1.762333 | 3.780700  | -0.623606 |
| 6 | -0.364122 | 4.155327  | -0.623606 |
| 6 | 2.393041  | 3.416596  | -0.623606 |
| 6 | 3.416596  | 2.393041  | -0.623606 |
| 6 | 4.155327  | -0.364122 | -0.623606 |
| 6 | 3.780700  | -1.762333 | -0.623606 |
| 6 | 1.762333  | -3.780700 | -0.623606 |
| 6 | 0.364122  | -4.155327 | -0.623606 |
| 6 | -2.393041 | -3.416596 | -0.623606 |
| 6 | -3.416596 | -2.393041 | -0.623606 |
| 6 | -4.155327 | 0.364122  | -0.623606 |
| 6 | -3.780700 | 1.762333  | -0.623606 |
| 6 | 0.364122  | 4.155327  | 0.623606  |
| 6 | 1.762333  | 3.780700  | 0.623606  |
| 6 | 3.780700  | 1.762333  | 0.623606  |
| 6 | 4.155327  | 0.364122  | 0.623606  |
| 6 | 3.416596  | -2.393041 | 0.623606  |
| 6 | 2.393041  | -3.416596 | 0.623606  |
| 6 | -0.364122 | -4.155327 | 0.623606  |

|   |           |           |          |
|---|-----------|-----------|----------|
| 6 | -1.762333 | -3.780700 | 0.623606 |
| 6 | -3.780700 | -1.762333 | 0.623606 |
| 6 | -4.155327 | -0.364122 | 0.623606 |
| 6 | -3.416596 | 2.393041  | 0.623606 |
| 6 | -2.393041 | 3.416596  | 0.623606 |
| 6 | 2.392677  | 3.412631  | 1.874979 |
| 6 | 3.412631  | 2.392677  | 1.874979 |
| 6 | 4.151714  | -0.365789 | 1.874979 |
| 6 | 3.778405  | -1.759082 | 1.874979 |
| 6 | 1.759082  | -3.778405 | 1.874979 |
| 6 | 0.365789  | -4.151714 | 1.874979 |
| 6 | -2.392677 | -3.412631 | 1.874979 |
| 6 | -3.412631 | -2.392677 | 1.874979 |
| 6 | -4.151714 | 0.365789  | 1.874979 |
| 6 | -3.778405 | 1.759082  | 1.874979 |
| 6 | -1.759082 | 3.778405  | 1.874979 |
| 6 | -0.365789 | 4.151714  | 1.874979 |
| 6 | 3.780454  | 1.761982  | 3.126805 |
| 6 | 4.154938  | 0.364304  | 3.126804 |
| 6 | 3.416168  | -2.393004 | 3.126804 |
| 6 | 2.393004  | -3.416168 | 3.126804 |
| 6 | -0.364303 | -4.154938 | 3.126804 |
| 6 | -1.761982 | -3.780454 | 3.126805 |
| 6 | -3.780454 | -1.761982 | 3.126805 |
| 6 | -4.154938 | -0.364303 | 3.126804 |
| 6 | -3.416168 | 2.393004  | 3.126804 |
| 6 | -2.393004 | 3.416168  | 3.126804 |
| 6 | 0.364304  | 4.154938  | 3.126804 |
| 6 | 1.761982  | 3.780454  | 3.126805 |
| 6 | 4.155681  | -0.363957 | 4.374058 |
| 6 | 3.780925  | -1.762653 | 4.374057 |
| 6 | 1.762654  | -3.780925 | 4.374057 |
| 6 | 0.363958  | -4.155681 | 4.374058 |
| 6 | -2.393076 | -3.416986 | 4.374058 |
| 6 | -3.416986 | -2.393076 | 4.374058 |
| 6 | -4.155681 | 0.363958  | 4.374058 |
| 6 | -3.780925 | 1.762654  | 4.374057 |
| 6 | -1.762653 | 3.780925  | 4.374057 |
| 6 | -0.363957 | 4.155681  | 4.374058 |
| 6 | 2.393076  | 3.416986  | 4.374058 |
| 6 | 3.416986  | 2.393076  | 4.374058 |
| 6 | 3.412702  | -2.392683 | 5.624941 |
| 6 | 2.392683  | -3.412702 | 5.624941 |
| 6 | -0.365758 | -4.151779 | 5.624941 |
| 6 | -1.759141 | -3.778445 | 5.624941 |
| 6 | -3.778445 | -1.759141 | 5.624941 |
| 6 | -4.151779 | -0.365758 | 5.624941 |
| 6 | -3.412702 | 2.392683  | 5.624941 |
| 6 | -2.392683 | 3.412702  | 5.624941 |
| 6 | 0.365758  | 4.151779  | 5.624941 |
| 6 | 1.759141  | 3.778445  | 5.624941 |
| 6 | 3.778445  | 1.759141  | 5.624941 |
| 6 | 4.151779  | 0.365758  | 5.624941 |
| 6 | 1.761606  | -3.780191 | 6.877174 |
| 6 | 0.364498  | -4.154523 | 6.877173 |
| 6 | -2.392964 | -3.415711 | 6.877173 |
| 6 | -3.415711 | -2.392964 | 6.877173 |
| 6 | -4.154523 | 0.364498  | 6.877173 |
| 6 | -3.780191 | 1.761606  | 6.877174 |
| 6 | -1.761606 | 3.780191  | 6.877174 |
| 6 | -0.364498 | 4.154523  | 6.877173 |
| 6 | 2.392964  | 3.415711  | 6.877173 |
| 6 | 3.415711  | 2.392964  | 6.877173 |
| 6 | 4.154523  | -0.364498 | 6.877173 |
| 6 | 3.780191  | -1.761606 | 6.877174 |
| 6 | -0.363811 | -4.155997 | 8.124549 |
| 6 | -1.762938 | -3.781125 | 8.124548 |
| 6 | -3.781125 | -1.762938 | 8.124548 |
| 6 | -4.155997 | -0.363811 | 8.124549 |
| 6 | -3.417332 | 2.393107  | 8.124549 |

|   |           |           |           |
|---|-----------|-----------|-----------|
| 6 | -2.393107 | 3.417332  | 8.124549  |
| 6 | 0.363811  | 4.155997  | 8.124549  |
| 6 | 1.762938  | 3.781125  | 8.124548  |
| 6 | 3.781125  | 1.762938  | 8.124548  |
| 6 | 4.155997  | 0.363811  | 8.124549  |
| 6 | 3.417332  | -2.393107 | 8.124549  |
| 6 | 2.393107  | -3.417332 | 8.124549  |
| 6 | -2.392693 | -3.412844 | 9.374913  |
| 6 | -3.412844 | -2.392693 | 9.374913  |
| 6 | -4.151907 | 0.365696  | 9.374913  |
| 6 | -3.778525 | 1.759259  | 9.374913  |
| 6 | -1.759259 | 3.778525  | 9.374913  |
| 6 | -0.365696 | 4.151907  | 9.374913  |
| 6 | 2.392693  | 3.412845  | 9.374913  |
| 6 | 3.412845  | 2.392693  | 9.374913  |
| 6 | 4.151907  | -0.365696 | 9.374913  |
| 6 | 3.778525  | -1.759259 | 9.374913  |
| 6 | 1.759259  | -3.778525 | 9.374913  |
| 6 | 0.365696  | -4.151907 | 9.374913  |
| 6 | -3.779915 | -1.761210 | 10.627501 |
| 6 | -4.154086 | -0.364702 | 10.627501 |
| 6 | -3.415231 | 2.392923  | 10.627500 |
| 6 | -2.392923 | 3.415231  | 10.627500 |
| 6 | 0.364702  | 4.154086  | 10.627501 |
| 6 | 1.761210  | 3.779915  | 10.627501 |
| 6 | 3.779915  | 1.761210  | 10.627501 |
| 6 | 4.154086  | 0.364702  | 10.627501 |
| 6 | 3.415231  | -2.392923 | 10.627500 |
| 6 | 2.392923  | -3.415231 | 10.627500 |
| 6 | -0.364702 | -4.154086 | 10.627501 |
| 6 | -1.761210 | -3.779915 | 10.627501 |
| 6 | -4.156267 | 0.363687  | 11.875078 |
| 6 | -3.781297 | 1.763182  | 11.875078 |
| 6 | -1.763182 | 3.781297  | 11.875078 |
| 6 | -0.363686 | 4.156267  | 11.875078 |
| 6 | 2.393134  | 3.417629  | 11.875078 |
| 6 | 3.417629  | 2.393134  | 11.875078 |
| 6 | 4.156267  | -0.363686 | 11.875078 |
| 6 | 3.781297  | -1.763182 | 11.875078 |
| 6 | 1.763182  | -3.781297 | 11.875078 |
| 6 | 0.363687  | -4.156267 | 11.875078 |
| 6 | -2.393134 | -3.417629 | 11.875078 |
| 6 | -3.417629 | -2.393134 | 11.875078 |
| 6 | -3.413056 | 2.392709  | 13.124900 |
| 6 | -2.392709 | 3.413056  | 13.124900 |
| 6 | 0.365604  | 4.152097  | 13.124899 |
| 6 | 1.759434  | 3.778644  | 13.124899 |
| 6 | 3.778644  | 1.759434  | 13.124899 |
| 6 | 4.152097  | 0.365604  | 13.124899 |
| 6 | 3.413056  | -2.392709 | 13.124900 |
| 6 | 2.392709  | -3.413056 | 13.124900 |
| 6 | -0.365604 | -4.152097 | 13.124899 |
| 6 | -1.759434 | -3.778644 | 13.124899 |
| 6 | -3.778644 | -1.759434 | 13.124899 |
| 6 | -4.152097 | -0.365604 | 13.124899 |
| 6 | -1.760801 | 3.779629  | 14.377786 |
| 6 | -0.364914 | 4.153634  | 14.377786 |
| 6 | 2.392880  | 3.414733  | 14.377786 |
| 6 | 3.414733  | 2.392880  | 14.377786 |
| 6 | 4.153634  | -0.364914 | 14.377786 |
| 6 | 3.779629  | -1.760801 | 14.377786 |
| 6 | 1.760801  | -3.779629 | 14.377786 |
| 6 | 0.364914  | -4.153634 | 14.377786 |
| 6 | -2.392880 | -3.414732 | 14.377786 |
| 6 | -3.414732 | -2.392880 | 14.377786 |
| 6 | -4.153634 | 0.364914  | 14.377786 |
| 6 | -3.779629 | 1.760801  | 14.377786 |
| 6 | 0.363584  | 4.156489  | 15.625643 |
| 6 | 1.763381  | 3.781438  | 15.625643 |
| 6 | 3.781438  | 1.763381  | 15.625643 |

|   |           |           |           |
|---|-----------|-----------|-----------|
| 6 | 4.156489  | 0.363584  | 15.625643 |
| 6 | 3.417873  | -2.393157 | 15.625643 |
| 6 | 2.393157  | -3.417873 | 15.625643 |
| 6 | -0.363584 | -4.156489 | 15.625643 |
| 6 | -1.763381 | -3.781438 | 15.625643 |
| 6 | -3.781438 | -1.763381 | 15.625643 |
| 6 | -4.156489 | -0.363584 | 15.625643 |
| 6 | -3.417873 | 2.393157  | 15.625643 |
| 6 | -2.393157 | 3.417873  | 15.625643 |
| 6 | 2.392729  | 3.413334  | 16.874906 |
| 6 | 3.413334  | 2.392729  | 16.874906 |
| 6 | 4.152348  | -0.365482 | 16.874906 |
| 6 | 3.778800  | -1.759665 | 16.874906 |
| 6 | 1.759665  | -3.778800 | 16.874906 |
| 6 | 0.365482  | -4.152348 | 16.874906 |
| 6 | -2.392729 | -3.413334 | 16.874906 |
| 6 | -3.413334 | -2.392729 | 16.874906 |
| 6 | -4.152348 | 0.365482  | 16.874906 |
| 6 | -3.778800 | 1.759665  | 16.874906 |
| 6 | -1.759665 | 3.778800  | 16.874906 |
| 6 | -0.365482 | 4.152348  | 16.874906 |
| 6 | 3.779336  | 1.760381  | 18.128030 |
| 6 | 4.153170  | 0.365130  | 18.128030 |
| 6 | 3.414222  | -2.392835 | 18.128030 |
| 6 | 2.392835  | -3.414222 | 18.128030 |
| 6 | -0.365130 | -4.153170 | 18.128030 |
| 6 | -1.760381 | -3.779336 | 18.128030 |
| 6 | -3.779336 | -1.760381 | 18.128030 |
| 6 | -4.153170 | -0.365130 | 18.128030 |
| 6 | -3.414222 | 2.392835  | 18.128030 |
| 6 | -2.392835 | 3.414222  | 18.128030 |
| 6 | 0.365130  | 4.153170  | 18.128030 |
| 6 | 1.760381  | 3.779336  | 18.128030 |
| 6 | 4.156660  | -0.363506 | 19.376245 |
| 6 | 3.781547  | -1.763534 | 19.376245 |
| 6 | 1.763534  | -3.781547 | 19.376245 |
| 6 | 0.363506  | -4.156660 | 19.376245 |
| 6 | -2.393175 | -3.418060 | 19.376244 |
| 6 | -3.418060 | -2.393175 | 19.376244 |
| 6 | -4.156660 | 0.363506  | 19.376245 |
| 6 | -3.781547 | 1.763534  | 19.376245 |
| 6 | -1.763534 | 3.781547  | 19.376245 |
| 6 | -0.363506 | 4.156660  | 19.376245 |
| 6 | 2.393175  | 3.418060  | 19.376244 |
| 6 | 3.418060  | 2.393175  | 19.376244 |
| 6 | 3.413677  | -2.392753 | 20.624936 |
| 6 | 2.392753  | -3.413677 | 20.624936 |
| 6 | -0.365332 | -4.152658 | 20.624935 |
| 6 | -1.759950 | -3.778993 | 20.624935 |
| 6 | -3.778993 | -1.759950 | 20.624935 |
| 6 | -4.152658 | -0.365332 | 20.624935 |
| 6 | -3.413677 | 2.392753  | 20.624936 |
| 6 | -2.392753 | 3.413677  | 20.624936 |
| 6 | 0.365332  | 4.152658  | 20.624935 |
| 6 | 1.759950  | 3.778993  | 20.624935 |
| 6 | 3.778993  | 1.759950  | 20.624935 |
| 6 | 4.152658  | 0.365332  | 20.624935 |
| 6 | 1.759952  | -3.779036 | 21.878234 |
| 6 | 0.365351  | -4.152696 | 21.878234 |
| 6 | -2.392790 | -3.413701 | 21.878233 |
| 6 | -3.413701 | -2.392790 | 21.878233 |
| 6 | -4.152696 | 0.365351  | 21.878234 |
| 6 | -3.779036 | 1.759952  | 21.878234 |
| 6 | -1.759952 | 3.779036  | 21.878234 |
| 6 | -0.365351 | 4.152696  | 21.878234 |
| 6 | 2.392790  | 3.413701  | 21.878234 |
| 6 | 3.413701  | 2.392790  | 21.878234 |
| 6 | 4.152696  | -0.365351 | 21.878234 |
| 6 | 3.779036  | -1.759952 | 21.878234 |
| 6 | -0.363452 | -4.156781 | 23.126883 |

|   |           |           |           |
|---|-----------|-----------|-----------|
| 6 | -1.763642 | -3.781625 | 23.126883 |
| 6 | -3.781625 | -1.763642 | 23.126883 |
| 6 | -4.156781 | -0.363452 | 23.126883 |
| 6 | -3.418191 | 2.393188  | 23.126883 |
| 6 | -2.393188 | 3.418191  | 23.126883 |
| 6 | 0.363452  | 4.156781  | 23.126883 |
| 6 | 1.763642  | 3.781625  | 23.126883 |
| 6 | 3.781625  | 1.763642  | 23.126883 |
| 6 | 4.156781  | 0.363452  | 23.126883 |
| 6 | 3.418191  | -2.393188 | 23.126883 |
| 6 | 2.393188  | -3.418191 | 23.126883 |
| 6 | -2.392783 | -3.414089 | 24.374989 |
| 6 | -3.414089 | -2.392783 | 24.374989 |
| 6 | -4.153027 | 0.365151  | 24.374989 |
| 6 | -3.779222 | 1.760291  | 24.374989 |
| 6 | -1.760291 | 3.779222  | 24.374989 |
| 6 | -0.365151 | 4.153027  | 24.374989 |
| 6 | 2.392783  | 3.414089  | 24.374989 |
| 6 | 3.414089  | 2.392783  | 24.374989 |
| 6 | 4.153027  | -0.365151 | 24.374989 |
| 6 | 3.779222  | -1.760291 | 24.374989 |
| 6 | 1.760291  | -3.779222 | 24.374989 |
| 6 | 0.365151  | -4.153027 | 24.374989 |
| 6 | -3.778729 | -1.759512 | 25.628399 |
| 6 | -4.152209 | -0.365579 | 25.628399 |
| 6 | -3.413164 | 2.392742  | 25.628399 |
| 6 | -2.392742 | 3.413164  | 25.628399 |
| 6 | 0.365579  | 4.152209  | 25.628399 |
| 6 | 1.759512  | 3.778729  | 25.628399 |
| 6 | 3.778729  | 1.759512  | 25.628399 |
| 6 | 4.152209  | 0.365579  | 25.628399 |
| 6 | 3.413164  | -2.392742 | 25.628399 |
| 6 | 2.392742  | -3.413164 | 25.628399 |
| 6 | -0.365579 | -4.152209 | 25.628399 |
| 6 | -1.759512 | -3.778729 | 25.628399 |
| 6 | -4.156853 | 0.363420  | 26.877566 |
| 6 | -3.781670 | 1.763703  | 26.877566 |
| 6 | -1.763703 | 3.781670  | 26.877566 |
| 6 | -0.363420 | 4.156853  | 26.877566 |
| 6 | 2.393199  | 3.418271  | 26.877565 |
| 6 | 3.418271  | 2.393199  | 26.877565 |
| 6 | 4.156853  | -0.363420 | 26.877566 |
| 6 | 3.781670  | -1.763703 | 26.877566 |
| 6 | 1.763703  | -3.781670 | 26.877566 |
| 6 | 0.363420  | -4.156853 | 26.877566 |
| 6 | -2.393199 | -3.418271 | 26.877565 |
| 6 | -3.418271 | -2.393199 | 26.877565 |
| 6 | -3.414570 | 2.392814  | 28.125066 |
| 6 | -2.392814 | 3.414570  | 28.125066 |
| 6 | 0.364940  | 4.153463  | 28.125065 |
| 6 | 1.760695  | 3.779495  | 28.125065 |
| 6 | 3.779495  | 1.760695  | 28.125065 |
| 6 | 4.153463  | 0.364940  | 28.125065 |
| 6 | 3.414570  | -2.392814 | 28.125066 |
| 6 | 2.392814  | -3.414570 | 28.125066 |
| 6 | -0.364940 | -4.153463 | 28.125065 |
| 6 | -1.760695 | -3.779495 | 28.125065 |
| 6 | -3.779495 | -1.760695 | 28.125065 |
| 6 | -4.153463 | -0.364940 | 28.125065 |
| 6 | -1.759045 | 3.778402  | 29.378525 |
| 6 | -0.365817 | 4.151696  | 29.378524 |
| 6 | 2.392696  | 3.412603  | 29.378524 |
| 6 | 3.412603  | 2.392696  | 29.378524 |
| 6 | 4.151696  | -0.365817 | 29.378524 |
| 6 | 3.778402  | -1.759045 | 29.378525 |
| 6 | 1.759045  | -3.778402 | 29.378525 |
| 6 | 0.365817  | -4.151696 | 29.378524 |
| 6 | -2.392696 | -3.412603 | 29.378524 |
| 6 | -3.412603 | -2.392696 | 29.378524 |
| 6 | -4.151696 | 0.365817  | 29.378524 |



|   |           |           |           |
|---|-----------|-----------|-----------|
| 6 | -3.778402 | 1.759045  | 29.378525 |
| 6 | 0.363414  | 4.156883  | 30.628309 |
| 6 | 1.763729  | 3.781694  | 30.628309 |
| 6 | 3.781694  | 1.763729  | 30.628309 |
| 6 | 4.156883  | 0.363414  | 30.628309 |
| 6 | 3.418297  | -2.393202 | 30.628309 |
| 6 | 2.393202  | -3.418297 | 30.628309 |
| 6 | -0.363414 | -4.156883 | 30.628309 |
| 6 | -1.763730 | -3.781694 | 30.628309 |
| 6 | -3.781694 | -1.763730 | 30.628309 |
| 6 | -4.156883 | -0.363414 | 30.628309 |
| 6 | -3.418297 | 2.393202  | 30.628309 |
| 6 | -2.393202 | 3.418297  | 30.628309 |
| 6 | 2.392857  | 3.415152  | 31.875159 |
| 6 | 3.415152  | 2.392857  | 31.875159 |
| 6 | 4.153981  | -0.364681 | 31.875159 |
| 6 | 3.779813  | -1.761171 | 31.875159 |
| 6 | 1.761171  | -3.779813 | 31.875159 |
| 6 | 0.364681  | -4.153981 | 31.875159 |
| 6 | -2.392857 | -3.415152 | 31.875159 |
| 6 | -3.415152 | -2.392857 | 31.875159 |
| 6 | -4.153981 | 0.364681  | 31.875159 |
| 6 | -3.779813 | 1.761171  | 31.875159 |
| 6 | -1.761171 | 3.779813  | 31.875159 |
| 6 | -0.364681 | 4.153981  | 31.875159 |
| 6 | 3.778033  | 1.758525  | 33.128602 |
| 6 | 4.151111  | 0.366089  | 33.128602 |
| 6 | 3.411955  | -2.392629 | 33.128602 |
| 6 | 2.392629  | -3.411955 | 33.128602 |
| 6 | -0.366089 | -4.151111 | 33.128602 |
| 6 | -1.758525 | -3.778033 | 33.128602 |
| 6 | -3.778033 | -1.758525 | 33.128602 |
| 6 | -4.151111 | -0.366089 | 33.128602 |
| 6 | -3.411955 | 2.392629  | 33.128602 |
| 6 | -2.392629 | 3.411955  | 33.128602 |
| 6 | 0.366089  | 4.151111  | 33.128602 |
| 6 | 1.758525  | 3.778033  | 33.128602 |
| 6 | 4.156838  | -0.363412 | 34.379159 |
| 6 | 3.781652  | -1.763699 | 34.379159 |
| 6 | 1.763699  | -3.781652 | 34.379159 |
| 6 | 0.363412  | -4.156838 | 34.379159 |
| 6 | -2.393189 | -3.418265 | 34.379159 |
| 6 | -3.418265 | -2.393189 | 34.379159 |
| 6 | -4.156838 | 0.363412  | 34.379159 |
| 6 | -3.781652 | 1.763699  | 34.379159 |
| 6 | -1.763699 | 3.781652  | 34.379159 |
| 6 | -0.363412 | 4.156838  | 34.379159 |
| 6 | 2.393189  | 3.418265  | 34.379159 |
| 6 | 3.418264  | 2.393189  | 34.379159 |
| 6 | 3.415842  | -2.392865 | 35.625262 |
| 6 | 2.392864  | -3.415842 | 35.625262 |
| 6 | -0.364351 | -4.154593 | 35.625262 |
| 6 | -1.761775 | -3.780180 | 35.625262 |
| 6 | -3.780180 | -1.761775 | 35.625262 |
| 6 | -4.154593 | -0.364351 | 35.625262 |
| 6 | -3.415842 | 2.392864  | 35.625262 |
| 6 | -2.392865 | 3.415842  | 35.625262 |
| 6 | 0.364351  | 4.154593  | 35.625262 |
| 6 | 1.761775  | 3.780180  | 35.625262 |
| 6 | 3.780180  | 1.761775  | 35.625262 |
| 6 | 4.154593  | 0.364351  | 35.625262 |
| 6 | 1.757854  | -3.777566 | 36.878610 |
| 6 | 0.366426  | -4.150379 | 36.878611 |
| 6 | -2.392570 | -3.411159 | 36.878612 |
| 6 | -3.411159 | -2.392570 | 36.878612 |
| 6 | -4.150379 | 0.366426  | 36.878611 |
| 6 | -3.777566 | 1.757854  | 36.878610 |
| 6 | -1.757854 | 3.777566  | 36.878610 |
| 6 | -0.366426 | 4.150379  | 36.878611 |
| 6 | 2.392570  | 3.411159  | 36.878612 |

|   |           |           |           |
|---|-----------|-----------|-----------|
| 6 | 3.411159  | 2.392570  | 36.878612 |
| 6 | 4.150379  | -0.366426 | 36.878611 |
| 6 | 3.777566  | -1.757854 | 36.878610 |
| 6 | -0.363450 | -4.157021 | 38.130261 |
| 6 | -1.763772 | -3.781833 | 38.130262 |
| 6 | -3.781833 | -1.763772 | 38.130262 |
| 6 | -4.157021 | -0.363450 | 38.130261 |
| 6 | -3.418397 | 2.393297  | 38.130259 |
| 6 | -2.393297 | 3.418397  | 38.130259 |
| 6 | 0.363450  | 4.157021  | 38.130261 |
| 6 | 1.763772  | 3.781833  | 38.130262 |
| 6 | 3.781833  | 1.763772  | 38.130262 |
| 6 | 4.157021  | 0.363450  | 38.130261 |
| 6 | 3.418397  | -2.393297 | 38.130259 |
| 6 | 2.393297  | -3.418397 | 38.130259 |
| 6 | -2.393313 | -3.417429 | 39.375327 |
| 6 | -3.417429 | -2.393313 | 39.375327 |
| 6 | -4.156174 | 0.363935  | 39.375324 |
| 6 | -3.781340 | 1.762912  | 39.375322 |
| 6 | -1.762912 | 3.781340  | 39.375322 |
| 6 | -0.363935 | 4.156174  | 39.375324 |
| 6 | 2.393313  | 3.417428  | 39.375327 |
| 6 | 3.417428  | 2.393313  | 39.375327 |
| 6 | 4.156174  | -0.363935 | 39.375324 |
| 6 | 3.781340  | -1.762912 | 39.375322 |
| 6 | 1.762912  | -3.781340 | 39.375322 |
| 6 | 0.363935  | -4.156174 | 39.375324 |
| 6 | -3.777499 | -1.756971 | 40.628317 |
| 6 | -4.149870 | -0.367169 | 40.628315 |
| 6 | -3.410339 | 2.392942  | 40.628311 |
| 6 | -2.392943 | 3.410339  | 40.628311 |
| 6 | 0.367169  | 4.149870  | 40.628315 |
| 6 | 1.756970  | 3.777499  | 40.628317 |
| 6 | 3.777499  | 1.756970  | 40.628317 |
| 6 | 4.149870  | 0.367169  | 40.628315 |
| 6 | 3.410339  | -2.392943 | 40.628311 |
| 6 | 2.392942  | -3.410339 | 40.628311 |
| 6 | -0.367169 | -4.149870 | 40.628315 |
| 6 | -1.756971 | -3.777499 | 40.628317 |
| 6 | -4.155929 | 0.363366  | 41.881841 |
| 6 | -3.780842 | 1.763283  | 41.881838 |
| 6 | -1.763283 | 3.780841  | 41.881838 |
| 6 | -0.363367 | 4.155929  | 41.881841 |
| 6 | 2.392692  | 3.417496  | 41.881845 |
| 6 | 3.417496  | 2.392692  | 41.881845 |
| 6 | 4.155929  | -0.363367 | 41.881841 |
| 6 | 3.780841  | -1.763283 | 41.881838 |
| 6 | 1.763283  | -3.780841 | 41.881838 |
| 6 | 0.363366  | -4.155929 | 41.881841 |
| 6 | -2.392692 | -3.417496 | 41.881845 |
| 6 | -3.417496 | -2.392692 | 41.881845 |
| 6 | -3.414743 | 2.389849  | 43.125025 |
| 6 | -2.389850 | 3.414742  | 43.125025 |
| 6 | 0.362288  | 4.152135  | 43.125032 |
| 6 | 1.762325  | 3.777013  | 43.125035 |
| 6 | 3.777013  | 1.762325  | 43.125035 |
| 6 | 4.152135  | 0.362288  | 43.125032 |
| 6 | 3.414742  | -2.389850 | 43.125025 |
| 6 | 2.389849  | -3.414743 | 43.125025 |
| 6 | -0.362288 | -4.152135 | 43.125032 |
| 6 | -1.762325 | -3.777013 | 43.125035 |
| 6 | -3.777013 | -1.762325 | 43.125035 |
| 6 | -4.152135 | -0.362288 | 43.125032 |
| 6 | -1.749163 | 3.763271  | 44.377566 |
| 6 | -0.366809 | 4.133662  | 44.377576 |
| 6 | 2.384516  | 3.396464  | 44.377582 |
| 6 | 3.396464  | 2.384516  | 44.377582 |
| 6 | 4.133662  | -0.366809 | 44.377576 |
| 6 | 3.763271  | -1.749163 | 44.377566 |
| 6 | 1.749163  | -3.763271 | 44.377566 |

|   |           |           |            |
|---|-----------|-----------|------------|
| 6 | 0.366809  | -4.133662 | 44.377576  |
| 6 | -2.384516 | -3.396464 | 44.377582  |
| 6 | -3.396464 | -2.384516 | 44.377582  |
| 6 | -4.133662 | 0.366809  | 44.377576  |
| 6 | -3.763271 | 1.749163  | 44.377566  |
| 6 | 0.359553  | 4.146111  | 45.639453  |
| 6 | 1.761658  | 3.770422  | 45.639450  |
| 6 | 3.770422  | 1.761658  | 45.639450  |
| 6 | 4.146111  | 0.359553  | 45.639453  |
| 6 | 3.410889  | -2.384482 | 45.639428  |
| 6 | 2.384482  | -3.410889 | 45.639428  |
| 6 | -0.359553 | -4.146111 | 45.639453  |
| 6 | -1.761658 | -3.770422 | 45.639450  |
| 6 | -3.770422 | -1.761658 | 45.639450  |
| 6 | -4.146111 | -0.359553 | 45.639453  |
| 6 | -3.410889 | 2.384482  | 45.639428  |
| 6 | -2.384482 | 3.410889  | 45.639428  |
| 6 | 2.413435  | 3.453854  | 46.879571  |
| 6 | 3.453854  | 2.413435  | 46.879571  |
| 6 | 4.197800  | -0.363179 | 46.879571  |
| 6 | 3.817030  | -1.784434 | 46.879548  |
| 6 | 1.784434  | -3.817030 | 46.879548  |
| 6 | 0.363178  | -4.197800 | 46.879571  |
| 6 | -2.413435 | -3.453854 | 46.879571  |
| 6 | -3.453854 | -2.413435 | 46.879571  |
| 6 | -4.197800 | 0.363178  | 46.879571  |
| 6 | -3.817030 | 1.784434  | 46.879548  |
| 6 | -1.784434 | 3.817030  | 46.879548  |
| 6 | -0.363179 | 4.197800  | 46.879571  |
| 6 | 3.890439  | 1.759339  | 48.093993  |
| 6 | 4.248860  | 0.421554  | 48.093995  |
| 6 | 3.468970  | -2.489652 | 48.093960  |
| 6 | 2.489652  | -3.468970 | 48.093960  |
| 6 | -0.421554 | -4.248860 | 48.093995  |
| 6 | -1.759339 | -3.890439 | 48.093993  |
| 6 | -3.890439 | -1.759339 | 48.093993  |
| 6 | -4.248860 | -0.421554 | 48.093995  |
| 6 | -3.468970 | 2.489652  | 48.093960  |
| 6 | -2.489652 | 3.468970  | 48.093960  |
| 6 | 0.421554  | 4.248860  | 48.093995  |
| 6 | 1.759339  | 3.890439  | 48.093993  |
| 1 | -4.446617 | -0.078425 | -49.050866 |
| 1 | -3.811720 | 2.291217  | -49.050864 |
| 1 | -2.291217 | 3.811720  | -49.050864 |
| 1 | 0.078425  | 4.446617  | -49.050866 |
| 1 | 2.155568  | 3.890279  | -49.050818 |
| 1 | 3.890279  | 2.155568  | -49.050818 |
| 1 | 4.446617  | 0.078425  | -49.050866 |
| 1 | 3.811720  | -2.291217 | -49.050864 |
| 1 | 2.291217  | -3.811720 | -49.050864 |
| 1 | -0.078425 | -4.446617 | -49.050866 |
| 1 | -2.155568 | -3.890279 | -49.050818 |
| 1 | -3.890279 | -2.155568 | -49.050818 |
| 1 | 3.811720  | 2.291217  | 49.050864  |
| 1 | 4.446616  | -0.078425 | 49.050866  |
| 1 | 3.890279  | -2.155568 | 49.050818  |
| 1 | 2.155568  | -3.890279 | 49.050818  |
| 1 | 0.078425  | -4.446617 | 49.050866  |
| 1 | -2.291217 | -3.811720 | 49.050864  |
| 1 | -3.811720 | -2.291217 | 49.050864  |
| 1 | -4.446617 | 0.078425  | 49.050866  |
| 1 | -3.890279 | 2.155568  | 49.050818  |
| 1 | -2.155568 | 3.890279  | 49.050818  |
| 1 | -0.078425 | 4.446616  | 49.050866  |
| 1 | 2.291217  | 3.811720  | 49.050864  |

Nanotube (6,6) u39v6s  
B3LYP/STO-3G Energy: -35704.282867

|   |           |           |            |
|---|-----------|-----------|------------|
| C | 1.506837  | 3.996759  | -48.702726 |
| C | 2.707884  | 3.303362  | -48.702723 |
| C | 4.214503  | 0.693418  | -48.702780 |
| C | 4.214503  | -0.693415 | -48.702780 |
| C | 2.707884  | -3.303359 | -48.702723 |
| C | 1.506837  | -3.996756 | -48.702727 |
| C | -1.506833 | -3.996756 | -48.702727 |
| C | -2.707880 | -3.303359 | -48.702724 |
| C | -4.214498 | -0.693415 | -48.702781 |
| C | -4.214498 | 0.693418  | -48.702781 |
| C | -2.707880 | 3.303362  | -48.702723 |
| C | -1.506833 | 3.996759  | -48.702727 |
| C | 3.226573  | 2.714026  | -47.490191 |
| C | 3.963640  | 1.437280  | -47.490216 |
| C | 3.963640  | -1.437278 | -47.490216 |
| C | 3.226573  | -2.714024 | -47.490191 |
| C | 0.737116  | -4.151239 | -47.490193 |
| C | -0.737112 | -4.151239 | -47.490193 |
| C | -3.226568 | -2.714024 | -47.490192 |
| C | -3.963636 | -1.437278 | -47.490217 |
| C | -3.963636 | 1.437280  | -47.490217 |
| C | -3.226568 | 2.714026  | -47.490191 |
| C | -0.737112 | 4.151242  | -47.490192 |
| C | 0.737116  | 4.151242  | -47.490192 |
| C | 4.097877  | 0.725359  | -46.250119 |
| C | 4.097877  | -0.725357 | -46.250119 |
| C | 2.677127  | -3.186176 | -46.250088 |
| C | 1.420750  | -3.911508 | -46.250092 |
| C | -1.420746 | -3.911508 | -46.250093 |
| C | -2.677123 | -3.186176 | -46.250089 |
| C | -4.097873 | -0.725357 | -46.250120 |
| C | -4.097873 | 0.725359  | -46.250120 |
| C | -2.677123 | 3.186179  | -46.250088 |
| C | -1.420746 | 3.911510  | -46.250092 |
| C | 1.420750  | 3.911510  | -46.250092 |
| C | 2.677127  | 3.186179  | -46.250088 |
| C | 3.899566  | -1.424239 | -44.987252 |
| C | 3.183230  | -2.664960 | -44.987241 |
| C | 0.716329  | -4.089181 | -44.987238 |
| C | -0.716325 | -4.089181 | -44.987238 |
| C | -3.183227 | -2.664960 | -44.987241 |
| C | -3.899562 | -1.424239 | -44.987253 |
| C | -3.899562 | 1.424242  | -44.987252 |
| C | -3.183227 | 2.664963  | -44.987241 |
| C | -0.716325 | 4.089183  | -44.987237 |
| C | 0.716329  | 4.089183  | -44.987237 |
| C | 3.183230  | 2.664963  | -44.987240 |
| C | 3.899566  | 1.424242  | -44.987252 |
| C | 2.682249  | -3.193481 | -43.736890 |
| C | 1.424535  | -3.919591 | -43.736889 |
| C | -1.424531 | -3.919591 | -43.736889 |
| C | -2.682246 | -3.193481 | -43.736891 |
| C | -4.106776 | -0.726131 | -43.736895 |
| C | -4.106776 | 0.726133  | -43.736895 |
| C | -2.682246 | 3.193483  | -43.736890 |
| C | -1.424531 | 3.919593  | -43.736889 |
| C | 1.424535  | 3.919593  | -43.736889 |
| C | 2.682249  | 3.193483  | -43.736890 |
| C | 4.106780  | 0.726133  | -43.736894 |
| C | 4.106780  | -0.726131 | -43.736894 |
| C | 0.724133  | -4.108339 | -42.493820 |
| C | -0.724129 | -4.108339 | -42.493821 |
| C | -3.195922 | -2.681307 | -42.493819 |
| C | -3.920051 | -1.427072 | -42.493822 |
| C | -3.920051 | 1.427074  | -42.493822 |
| C | -3.195922 | 2.681309  | -42.493819 |
| C | -0.724129 | 4.108341  | -42.493820 |
| C | 0.724133  | 4.108341  | -42.493820 |
| C | 3.195925  | 2.681309  | -42.493818 |

|   |           |           |            |
|---|-----------|-----------|------------|
| C | 3.920054  | 1.427074  | -42.493821 |
| C | 3.920054  | -1.427072 | -42.493821 |
| C | 3.195925  | -2.681307 | -42.493818 |
| C | -1.428833 | -3.915065 | -41.238988 |
| C | -2.676165 | -3.194954 | -41.238988 |
| C | -4.105000 | -0.720135 | -41.238988 |
| C | -4.105000 | 0.720137  | -41.238988 |
| C | -2.676165 | 3.194955  | -41.238988 |
| C | -1.428833 | 3.915067  | -41.238987 |
| C | 1.428835  | 3.915067  | -41.238987 |
| C | 2.676168  | 3.194955  | -41.238987 |
| C | 4.105003  | 0.720137  | -41.238987 |
| C | 4.105003  | -0.720135 | -41.238987 |
| C | 2.676168  | -3.194954 | -41.238987 |
| C | 1.428835  | -3.915065 | -41.238988 |
| C | -3.197652 | -2.684230 | -39.988344 |
| C | -3.923440 | -1.427115 | -39.988344 |
| C | -3.923440 | 1.427116  | -39.988344 |
| C | -3.197652 | 2.684232  | -39.988343 |
| C | -0.725791 | 4.111303  | -39.988343 |
| C | 0.725794  | 4.111303  | -39.988343 |
| C | 3.197655  | 2.684232  | -39.988342 |
| C | 3.923443  | 1.427116  | -39.988343 |
| C | 3.923443  | -1.427115 | -39.988343 |
| C | 3.197655  | -2.684230 | -39.988343 |
| C | 0.725794  | -4.111302 | -39.988343 |
| C | -0.725791 | -4.111302 | -39.988343 |
| C | -4.109333 | -0.724235 | -38.743613 |
| C | -4.109333 | 0.724237  | -38.743612 |
| C | -2.681886 | 3.196664  | -38.743611 |
| C | -1.427454 | 3.920876  | -38.743612 |
| C | 1.427457  | 3.920876  | -38.743611 |
| C | 2.681888  | 3.196664  | -38.743611 |
| C | 4.109336  | 0.724237  | -38.743612 |
| C | 4.109336  | -0.724236 | -38.743612 |
| C | 2.681888  | -3.196663 | -38.743611 |
| C | 1.427457  | -3.920875 | -38.743612 |
| C | -1.427454 | -3.920875 | -38.743612 |
| C | -2.681886 | -3.196663 | -38.743612 |
| C | -3.915564 | 1.428275  | -37.490277 |
| C | -3.194721 | 2.676830  | -37.490277 |
| C | -0.720847 | 4.105072  | -37.490278 |
| C | 0.720849  | 4.105072  | -37.490278 |
| C | 3.194723  | 2.676830  | -37.490277 |
| C | 3.915566  | 1.428275  | -37.490276 |
| C | 3.915566  | -1.428273 | -37.490276 |
| C | 3.194723  | -2.676828 | -37.490277 |
| C | 0.720849  | -4.105071 | -37.490279 |
| C | -0.720847 | -4.105071 | -37.490279 |
| C | -3.194721 | -2.676828 | -37.490278 |
| C | -3.915564 | -1.428273 | -37.490277 |
| C | -2.683154 | 3.196929  | -36.239407 |
| C | -1.427048 | 3.922112  | -36.239408 |
| C | 1.427050  | 3.922112  | -36.239407 |
| C | 2.683156  | 3.196929  | -36.239406 |
| C | 4.110192  | 0.725204  | -36.239404 |
| C | 4.110192  | -0.725203 | -36.239404 |
| C | 2.683156  | -3.196928 | -36.239407 |
| C | 1.427050  | -3.922111 | -36.239408 |
| C | -1.427048 | -3.922111 | -36.239408 |
| C | -2.683154 | -3.196928 | -36.239407 |
| C | -4.110190 | -0.725203 | -36.239405 |
| C | -4.110191 | 0.725204  | -36.239405 |
| C | -0.724154 | 4.109048  | -34.993908 |
| C | 0.724156  | 4.109048  | -34.993908 |
| C | 3.196505  | 2.681683  | -34.993905 |
| C | 3.920653  | 1.427400  | -34.993904 |
| C | 3.920653  | -1.427399 | -34.993904 |
| C | 3.196505  | -2.681682 | -34.993905 |
| C | 0.724156  | -4.109047 | -34.993909 |

|   |           |           |            |
|---|-----------|-----------|------------|
| C | -0.724154 | -4.109047 | -34.993909 |
| C | -3.196504 | -2.681682 | -34.993906 |
| C | -3.920651 | -1.427399 | -34.993905 |
| C | -3.920651 | 1.427400  | -34.993905 |
| C | -3.196504 | 2.681683  | -34.993906 |
| C | 1.428183  | 3.916087  | -33.741291 |
| C | 2.677362  | 3.194903  | -33.741290 |
| C | 4.105535  | 0.721205  | -33.741288 |
| C | 4.105535  | -0.721204 | -33.741288 |
| C | 2.677362  | -3.194902 | -33.741290 |
| C | 1.428183  | -3.916087 | -33.741291 |
| C | -1.428182 | -3.916087 | -33.741291 |
| C | -2.677361 | -3.194902 | -33.741290 |
| C | -4.105534 | -0.721204 | -33.741289 |
| C | -4.105534 | 0.721205  | -33.741289 |
| C | -2.677361 | 3.194903  | -33.741290 |
| C | -1.428182 | 3.916087  | -33.741291 |
| C | 3.196858  | 2.682795  | -32.490402 |
| C | 3.921788  | 1.427152  | -32.490401 |
| C | 3.921788  | -1.427152 | -32.490401 |
| C | 3.196858  | -2.682795 | -32.490402 |
| C | 0.724941  | -4.109913 | -32.490403 |
| C | -0.724940 | -4.109913 | -32.490403 |
| C | -3.196857 | -2.682795 | -32.490403 |
| C | -3.921787 | -1.427152 | -32.490402 |
| C | -3.921787 | 1.427152  | -32.490402 |
| C | -3.196857 | 2.682795  | -32.490403 |
| C | -0.724940 | 4.109914  | -32.490403 |
| C | 0.724941  | 4.109914  | -32.490403 |
| C | 4.109086  | 0.724141  | -31.244478 |
| C | 4.109086  | -0.724141 | -31.244478 |
| C | 2.681683  | -3.196513 | -31.244479 |
| C | 1.427420  | -3.920636 | -31.244480 |
| C | -1.427419 | -3.920636 | -31.244480 |
| C | -2.681682 | -3.196513 | -31.244479 |
| C | -4.109085 | -0.724141 | -31.244479 |
| C | -4.109085 | 0.724141  | -31.244479 |
| C | -2.681682 | 3.196514  | -31.244479 |
| C | -1.427419 | 3.920636  | -31.244479 |
| C | 1.427420  | 3.920636  | -31.244479 |
| C | 2.681683  | 3.196514  | -31.244478 |
| C | 3.916432  | -1.428127 | -29.992266 |
| C | 3.195027  | -2.677668 | -29.992267 |
| C | 0.721416  | -4.105770 | -29.992268 |
| C | -0.721415 | -4.105770 | -29.992268 |
| C | -3.195027 | -2.677667 | -29.992268 |
| C | -3.916432 | -1.428127 | -29.992267 |
| C | -3.916432 | 1.428127  | -29.992267 |
| C | -3.195027 | 2.677668  | -29.992267 |
| C | -0.721416 | 4.105770  | -29.992268 |
| C | 0.721416  | 4.105770  | -29.992268 |
| C | 3.195027  | 2.677668  | -29.992267 |
| C | 3.916432  | 1.428127  | -29.992266 |
| C | 2.682561  | -3.196777 | -28.741377 |
| C | 1.427208  | -3.921531 | -28.741378 |
| C | -1.427208 | -3.921531 | -28.741378 |
| C | -2.682561 | -3.196777 | -28.741377 |
| C | -4.109749 | -0.724771 | -28.741375 |
| C | -4.109749 | 0.724771  | -28.741375 |
| C | -2.682561 | 3.196777  | -28.741377 |
| C | -1.427208 | 3.921531  | -28.741377 |
| C | 1.427208  | 3.921531  | -28.741377 |
| C | 2.682561  | 3.196777  | -28.741376 |
| C | 4.109749  | 0.724771  | -28.741374 |
| C | 4.109749  | -0.724771 | -28.741374 |
| C | 0.724134  | -4.109057 | -27.495178 |
| C | -0.724134 | -4.109057 | -27.495178 |
| C | -3.196510 | -2.681667 | -27.495176 |
| C | -3.920632 | -1.427418 | -27.495176 |
| C | -3.920632 | 1.427418  | -27.495176 |

|   |           |           |            |
|---|-----------|-----------|------------|
| C | -3.196510 | 2.681667  | -27.495176 |
| C | -0.724135 | 4.109057  | -27.495178 |
| C | 0.724134  | 4.109057  | -27.495178 |
| C | 3.196510  | 2.681667  | -27.495175 |
| C | 3.920632  | 1.427418  | -27.495175 |
| C | 3.920632  | -1.427418 | -27.495175 |
| C | 3.196510  | -2.681667 | -27.495176 |
| C | -1.428091 | -3.916635 | -26.243232 |
| C | -2.677873 | -3.195097 | -26.243231 |
| C | -4.105948 | -0.721554 | -26.243230 |
| C | -4.105948 | 0.721554  | -26.243230 |
| C | -2.677873 | 3.195096  | -26.243231 |
| C | -1.428091 | 3.916634  | -26.243231 |
| C | 1.428091  | 3.916634  | -26.243231 |
| C | 2.677872  | 3.195096  | -26.243230 |
| C | 4.105947  | 0.721554  | -26.243229 |
| C | 4.105947  | -0.721554 | -26.243230 |
| C | 2.677872  | -3.195097 | -26.243231 |
| C | 1.428091  | -3.916635 | -26.243231 |
| C | -3.196724 | -2.682388 | -24.992334 |
| C | -3.921362 | -1.427244 | -24.992333 |
| C | -3.921362 | 1.427244  | -24.992333 |
| C | -3.196724 | 2.682388  | -24.992334 |
| C | -0.724651 | 4.109605  | -24.992333 |
| C | 0.724650  | 4.109605  | -24.992333 |
| C | 3.196724  | 2.682388  | -24.992333 |
| C | 3.921362  | 1.427244  | -24.992333 |
| C | 3.921362  | -1.427245 | -24.992333 |
| C | 3.196724  | -2.682388 | -24.992333 |
| C | 0.724650  | -4.109605 | -24.992333 |
| C | -0.724651 | -4.109605 | -24.992333 |
| C | -4.109058 | -0.724138 | -23.745940 |
| C | -4.109058 | 0.724137  | -23.745940 |
| C | -2.681668 | 3.196500  | -23.745939 |
| C | -1.427412 | 3.920622  | -23.745939 |
| C | 1.427412  | 3.920622  | -23.745939 |
| C | 2.681667  | 3.196500  | -23.745939 |
| C | 4.109057  | 0.724137  | -23.745939 |
| C | 4.109057  | -0.724138 | -23.745939 |
| C | 2.681667  | -3.196501 | -23.745939 |
| C | 1.427412  | -3.920623 | -23.745939 |
| C | -1.427412 | -3.920623 | -23.745940 |
| C | -2.681668 | -3.196501 | -23.745940 |
| C | -3.916785 | 1.428065  | -22.494190 |
| C | -3.195150 | 2.678011  | -22.494190 |
| C | -0.721650 | 4.106055  | -22.494191 |
| C | 0.721648  | 4.106055  | -22.494190 |
| C | 3.195149  | 2.678010  | -22.494190 |
| C | 3.916784  | 1.428065  | -22.494190 |
| C | 3.916784  | -1.428065 | -22.494190 |
| C | 3.195149  | -2.678011 | -22.494190 |
| C | 0.721649  | -4.106056 | -22.494191 |
| C | -0.721649 | -4.106056 | -22.494191 |
| C | -3.195150 | -2.678011 | -22.494191 |
| C | -3.916785 | -1.428065 | -22.494191 |
| C | -2.682257 | 3.196678  | -21.243280 |
| C | -1.427272 | 3.921222  | -21.243280 |
| C | 1.427271  | 3.921222  | -21.243279 |
| C | 2.682255  | 3.196678  | -21.243279 |
| C | 4.109503  | 0.724558  | -21.243278 |
| C | 4.109503  | -0.724559 | -21.243278 |
| C | 2.682255  | -3.196678 | -21.243279 |
| C | 1.427271  | -3.921222 | -21.243280 |
| C | -1.427272 | -3.921222 | -21.243280 |
| C | -2.682257 | -3.196678 | -21.243280 |
| C | -4.109505 | -0.724559 | -21.243278 |
| C | -4.109505 | 0.724558  | -21.243278 |
| C | -0.724147 | 4.109061  | -19.996750 |
| C | 0.724146  | 4.109061  | -19.996750 |
| C | 3.196501  | 2.681678  | -19.996749 |

|   |           |           |            |
|---|-----------|-----------|------------|
| C | 3.920634  | 1.427407  | -19.996749 |
| C | 3.920634  | -1.427407 | -19.996749 |
| C | 3.196501  | -2.681679 | -19.996749 |
| C | 0.724146  | -4.109062 | -19.996751 |
| C | -0.724147 | -4.109062 | -19.996751 |
| C | -3.196502 | -2.681679 | -19.996750 |
| C | -3.920635 | -1.427407 | -19.996749 |
| C | -3.920635 | 1.427407  | -19.996749 |
| C | -3.196502 | 2.681678  | -19.996749 |
| C | 1.428045  | 3.916887  | -18.745153 |
| C | 2.678109  | 3.195183  | -18.745153 |
| C | 4.106136  | 0.721717  | -18.745153 |
| C | 4.106136  | -0.721718 | -18.745153 |
| C | 2.678109  | -3.195184 | -18.745153 |
| C | 1.428045  | -3.916888 | -18.745154 |
| C | -1.428046 | -3.916888 | -18.745154 |
| C | -2.678111 | -3.195184 | -18.745154 |
| C | -4.106137 | -0.721718 | -18.745153 |
| C | -4.106137 | 0.721717  | -18.745153 |
| C | -2.678111 | 3.195183  | -18.745153 |
| C | -1.428046 | 3.916887  | -18.745153 |
| C | 3.196643  | 2.682151  | -17.494218 |
| C | 3.921114  | 1.427294  | -17.494218 |
| C | 3.921114  | -1.427295 | -17.494218 |
| C | 3.196643  | -2.682152 | -17.494218 |
| C | 0.724484  | -4.109422 | -17.494218 |
| C | -0.724486 | -4.109422 | -17.494218 |
| C | -3.196645 | -2.682152 | -17.494219 |
| C | -3.921115 | -1.427295 | -17.494219 |
| C | -3.921115 | 1.427294  | -17.494219 |
| C | -3.196645 | 2.682151  | -17.494219 |
| C | -0.724486 | 4.109421  | -17.494218 |
| C | 0.724484  | 4.109421  | -17.494218 |
| C | 4.109070  | 0.724161  | -16.247590 |
| C | 4.109070  | -0.724162 | -16.247590 |
| C | 2.681695  | -3.196504 | -16.247590 |
| C | 1.427398  | -3.920651 | -16.247590 |
| C | -1.427400 | -3.920651 | -16.247590 |
| C | -2.681697 | -3.196504 | -16.247590 |
| C | -4.109072 | -0.724162 | -16.247591 |
| C | -4.109072 | 0.724161  | -16.247591 |
| C | -2.681697 | 3.196503  | -16.247590 |
| C | -1.427400 | 3.920650  | -16.247590 |
| C | 1.427398  | 3.920650  | -16.247589 |
| C | 2.681695  | 3.196503  | -16.247589 |
| C | 3.916961  | -1.428033 | -14.996115 |
| C | 3.195209  | -2.678183 | -14.996115 |
| C | 0.721765  | -4.106197 | -14.996116 |
| C | -0.721767 | -4.106197 | -14.996116 |
| C | -3.195211 | -2.678183 | -14.996116 |
| C | -3.916963 | -1.428033 | -14.996116 |
| C | -3.916963 | 1.428032  | -14.996116 |
| C | -3.195211 | 2.678181  | -14.996116 |
| C | -0.721767 | 4.106195  | -14.996115 |
| C | 0.721765  | 4.106195  | -14.996115 |
| C | 3.195209  | 2.678181  | -14.996115 |
| C | 3.916961  | 1.428032  | -14.996115 |
| C | 2.682063  | -3.196616 | -13.745151 |
| C | 1.427312  | -3.921027 | -13.745151 |
| C | -1.427314 | -3.921027 | -13.745152 |
| C | -2.682066 | -3.196616 | -13.745152 |
| C | -4.109354 | -0.724425 | -13.745151 |
| C | -4.109354 | 0.724424  | -13.745151 |
| C | -2.682066 | 3.196615  | -13.745151 |
| C | -1.427314 | 3.921025  | -13.745151 |
| C | 1.427312  | 3.921025  | -13.745151 |
| C | 2.682063  | 3.196615  | -13.745151 |
| C | 4.109351  | 0.724424  | -13.745150 |
| C | 4.109351  | -0.724425 | -13.745150 |
| C | 0.724179  | -4.109092 | -12.498454 |



|   |           |           |            |
|---|-----------|-----------|------------|
| C | -0.724181 | -4.109091 | -12.498454 |
| C | -3.196511 | -2.681722 | -12.498454 |
| C | -3.920677 | -1.427393 | -12.498453 |
| C | -3.920677 | 1.427392  | -12.498453 |
| C | -3.196511 | 2.681721  | -12.498453 |
| C | -0.724181 | 4.109090  | -12.498454 |
| C | 0.724179  | 4.109090  | -12.498454 |
| C | 3.196508  | 2.681721  | -12.498453 |
| C | 3.920674  | 1.427392  | -12.498453 |
| C | 3.920674  | -1.427393 | -12.498453 |
| C | 3.196508  | -2.681722 | -12.498453 |
| C | -1.428025 | -3.917015 | -11.247082 |
| C | -2.678233 | -3.195228 | -11.247082 |
| C | -4.106236 | -0.721801 | -11.247082 |
| C | -4.106236 | 0.721799  | -11.247082 |
| C | -2.678233 | 3.195227  | -11.247082 |
| C | -1.428025 | 3.917014  | -11.247082 |
| C | 1.428022  | 3.917014  | -11.247082 |
| C | 2.678230  | 3.195227  | -11.247082 |
| C | 4.106234  | 0.721799  | -11.247082 |
| C | 4.106234  | -0.721801 | -11.247082 |
| C | 2.678230  | -3.195229 | -11.247082 |
| C | 1.428022  | -3.917015 | -11.247082 |
| C | -3.196592 | -2.681993 | -9.996082  |
| C | -3.920952 | -1.427328 | -9.996082  |
| C | -3.920952 | 1.427327  | -9.996082  |
| C | -3.196592 | 2.681992  | -9.996082  |
| C | -0.724375 | 4.109295  | -9.996081  |
| C | 0.724373  | 4.109295  | -9.996081  |
| C | 3.196589  | 2.681992  | -9.996082  |
| C | 3.920949  | 1.427327  | -9.996082  |
| C | 3.920949  | -1.427328 | -9.996082  |
| C | 3.196589  | -2.681993 | -9.996082  |
| C | 0.724373  | -4.109297 | -9.996081  |
| C | -0.724375 | -4.109297 | -9.996081  |
| C | -4.109116 | -0.724203 | -8.749340  |
| C | -4.109116 | 0.724202  | -8.749340  |
| C | -2.681754 | 3.196519  | -8.749339  |
| C | -1.427387 | 3.920707  | -8.749338  |
| C | 1.427384  | 3.920707  | -8.749338  |
| C | 2.681752  | 3.196519  | -8.749338  |
| C | 4.109113  | 0.724202  | -8.749339  |
| C | 4.109113  | -0.724203 | -8.749339  |
| C | 2.681752  | -3.196520 | -8.749338  |
| C | 1.427384  | -3.920709 | -8.749338  |
| C | -1.427387 | -3.920709 | -8.749339  |
| C | -2.681754 | -3.196520 | -8.749339  |
| C | -3.917048 | 1.428015  | -7.498052  |
| C | -3.195239 | 2.678263  | -7.498052  |
| C | -0.721825 | 4.106259  | -7.498052  |
| C | 0.721822  | 4.106259  | -7.498052  |
| C | 3.195236  | 2.678263  | -7.498052  |
| C | 3.917045  | 1.428015  | -7.498052  |
| C | 3.917045  | -1.428016 | -7.498052  |
| C | 3.195236  | -2.678264 | -7.498052  |
| C | 0.721822  | -4.106261 | -7.498052  |
| C | -0.721825 | -4.106261 | -7.498052  |
| C | -3.195238 | -2.678264 | -7.498053  |
| C | -3.917048 | -1.428016 | -7.498053  |
| C | -2.681935 | 3.196574  | -6.247011  |
| C | -1.427345 | 3.920891  | -6.247011  |
| C | 1.427342  | 3.920891  | -6.247011  |
| C | 2.681932  | 3.196574  | -6.247011  |
| C | 4.109252  | 0.724330  | -6.247010  |
| C | 4.109252  | -0.724332 | -6.247010  |
| C | 2.681932  | -3.196576 | -6.247011  |
| C | 1.427342  | -3.920893 | -6.247011  |
| C | -1.427345 | -3.920893 | -6.247011  |
| C | -2.681935 | -3.196576 | -6.247011  |
| C | -4.109255 | -0.724332 | -6.247010  |

|   |           |           |           |
|---|-----------|-----------|-----------|
| C | -4.109255 | 0.724330  | -6.247010 |
| C | -0.724230 | 4.109137  | -5.000239 |
| C | 0.724227  | 4.109137  | -5.000239 |
| C | 3.196525  | 2.681786  | -5.000238 |
| C | 3.920740  | 1.427374  | -5.000238 |
| C | 3.920740  | -1.427375 | -5.000238 |
| C | 3.196525  | -2.681788 | -5.000238 |
| C | 0.724227  | -4.109139 | -5.000239 |
| C | -0.724230 | -4.109138 | -5.000239 |
| C | -3.196528 | -2.681788 | -5.000238 |
| C | -3.920743 | -1.427375 | -5.000238 |
| C | -3.920743 | 1.427374  | -5.000238 |
| C | -3.196528 | 2.681786  | -5.000238 |
| C | 1.428013  | 3.917068  | -3.749025 |
| C | 2.678282  | 3.195246  | -3.749025 |
| C | 4.106277  | 0.721835  | -3.749025 |
| C | 4.106277  | -0.721837 | -3.749025 |
| C | 2.678282  | -3.195248 | -3.749025 |
| C | 1.428013  | -3.917070 | -3.749025 |
| C | -1.428016 | -3.917070 | -3.749025 |
| C | -2.678285 | -3.195248 | -3.749025 |
| C | -4.106280 | -0.721837 | -3.749025 |
| C | -4.106280 | 0.721835  | -3.749025 |
| C | -2.678285 | 3.195246  | -3.749025 |
| C | -1.428016 | 3.917068  | -3.749025 |
| C | 3.196555  | 2.681877  | -2.497935 |
| C | 3.920833  | 1.427354  | -2.497935 |
| C | 3.920833  | -1.427355 | -2.497935 |
| C | 3.196555  | -2.681879 | -2.497935 |
| C | 0.724291  | -4.109209 | -2.497934 |
| C | -0.724294 | -4.109209 | -2.497934 |
| C | -3.196558 | -2.681879 | -2.497935 |
| C | -3.920836 | -1.427355 | -2.497935 |
| C | -3.920836 | 1.427354  | -2.497935 |
| C | -3.196558 | 2.681877  | -2.497935 |
| C | -0.724294 | 4.109208  | -2.497934 |
| C | 0.724291  | 4.109208  | -2.497934 |
| C | 4.109169  | 0.724257  | -1.251148 |
| C | 4.109169  | -0.724259 | -1.251148 |
| C | 2.681828  | -3.196541 | -1.251147 |
| C | 1.427364  | -3.920785 | -1.251147 |
| C | -1.427367 | -3.920785 | -1.251147 |
| C | -2.681831 | -3.196541 | -1.251147 |
| C | -4.109172 | -0.724259 | -1.251148 |
| C | -4.109172 | 0.724257  | -1.251148 |
| C | -2.681831 | 3.196539  | -1.251147 |
| C | -1.427367 | 3.920783  | -1.251147 |
| C | 1.427364  | 3.920783  | -1.251147 |
| C | 2.681828  | 3.196539  | -1.251147 |
| C | 3.917074  | -1.428014 | 0.000000  |
| C | 3.195248  | -2.678291 | 0.000000  |
| C | 0.721838  | -4.106284 | 0.000000  |
| C | -0.721841 | -4.106284 | 0.000000  |
| C | -3.195251 | -2.678291 | 0.000000  |
| C | -3.917077 | -1.428014 | 0.000000  |
| C | -3.917077 | 1.428012  | 0.000000  |
| C | -3.195251 | 2.678289  | 0.000000  |
| C | -0.721841 | 4.106283  | 0.000000  |
| C | 0.721838  | 4.106283  | 0.000000  |
| C | 3.195248  | 2.678289  | 0.000000  |
| C | 3.917074  | 1.428012  | 0.000000  |
| C | 2.681828  | -3.196541 | 1.251147  |
| C | 1.427364  | -3.920785 | 1.251147  |
| C | -1.427367 | -3.920785 | 1.251147  |
| C | -2.681831 | -3.196541 | 1.251147  |
| C | -4.109172 | -0.724259 | 1.251148  |
| C | -4.109172 | 0.724257  | 1.251148  |
| C | -2.681831 | 3.196539  | 1.251147  |
| C | -1.427367 | 3.920783  | 1.251147  |
| C | 1.427364  | 3.920783  | 1.251147  |

|   |           |           |          |
|---|-----------|-----------|----------|
| C | 2.681828  | 3.196539  | 1.251147 |
| C | 4.109169  | 0.724257  | 1.251148 |
| C | 4.109169  | -0.724259 | 1.251148 |
| C | 0.724291  | -4.109209 | 2.497934 |
| C | -0.724294 | -4.109209 | 2.497934 |
| C | -3.196558 | -2.681879 | 2.497935 |
| C | -3.920836 | -1.427355 | 2.497935 |
| C | -3.920836 | 1.427354  | 2.497935 |
| C | -3.196558 | 2.681877  | 2.497935 |
| C | -0.724294 | 4.109208  | 2.497934 |
| C | 0.724291  | 4.109208  | 2.497934 |
| C | 3.196555  | 2.681877  | 2.497935 |
| C | 3.920833  | 1.427354  | 2.497935 |
| C | 3.920833  | -1.427355 | 2.497935 |
| C | 3.196555  | -2.681879 | 2.497935 |
| C | -1.428016 | -3.917070 | 3.749025 |
| C | -2.678285 | -3.195248 | 3.749025 |
| C | -4.106280 | -0.721837 | 3.749025 |
| C | -4.106280 | 0.721835  | 3.749025 |
| C | -2.678285 | 3.195246  | 3.749025 |
| C | -1.428016 | 3.917068  | 3.749025 |
| C | 1.428013  | 3.917068  | 3.749025 |
| C | 2.678282  | 3.195246  | 3.749025 |
| C | 4.106277  | 0.721835  | 3.749025 |
| C | 4.106277  | -0.721837 | 3.749025 |
| C | 2.678282  | -3.195248 | 3.749025 |
| C | 1.428013  | -3.917070 | 3.749025 |
| C | -3.196528 | -2.681788 | 5.000238 |
| C | -3.920742 | -1.427375 | 5.000238 |
| C | -3.920743 | 1.427374  | 5.000238 |
| C | -3.196528 | 2.681786  | 5.000238 |
| C | -0.724230 | 4.109137  | 5.000239 |
| C | 0.724227  | 4.109137  | 5.000239 |
| C | 3.196525  | 2.681786  | 5.000238 |
| C | 3.920740  | 1.427374  | 5.000238 |
| C | 3.920740  | -1.427375 | 5.000238 |
| C | 3.196525  | -2.681788 | 5.000238 |
| C | 0.724227  | -4.109138 | 5.000239 |
| C | -0.724230 | -4.109138 | 5.000239 |
| C | -4.109255 | -0.724332 | 6.247010 |
| C | -4.109255 | 0.724330  | 6.247010 |
| C | -2.681935 | 3.196574  | 6.247011 |
| C | -1.427345 | 3.920891  | 6.247011 |
| C | 1.427342  | 3.920891  | 6.247011 |
| C | 2.681932  | 3.196574  | 6.247011 |
| C | 4.109252  | 0.724330  | 6.247010 |
| C | 4.109252  | -0.724332 | 6.247010 |
| C | 2.681932  | -3.196576 | 6.247011 |
| C | 1.427342  | -3.920893 | 6.247011 |
| C | -1.427345 | -3.920893 | 6.247011 |
| C | -2.681935 | -3.196576 | 6.247011 |
| C | -3.917048 | 1.428015  | 7.498052 |
| C | -3.195239 | 2.678263  | 7.498052 |
| C | -0.721825 | 4.106259  | 7.498052 |
| C | 0.721822  | 4.106259  | 7.498052 |
| C | 3.195236  | 2.678263  | 7.498052 |
| C | 3.917045  | 1.428015  | 7.498052 |
| C | 3.917045  | -1.428016 | 7.498052 |
| C | 3.195236  | -2.678264 | 7.498052 |
| C | 0.721822  | -4.106261 | 7.498052 |
| C | -0.721825 | -4.106261 | 7.498052 |
| C | -3.195238 | -2.678264 | 7.498053 |
| C | -3.917048 | -1.428016 | 7.498053 |
| C | -2.681754 | 3.196519  | 8.749339 |
| C | -1.427387 | 3.920707  | 8.749338 |
| C | 1.427384  | 3.920707  | 8.749338 |
| C | 2.681752  | 3.196519  | 8.749338 |
| C | 4.109113  | 0.724202  | 8.749339 |
| C | 4.109113  | -0.724203 | 8.749339 |
| C | 2.681752  | -3.196520 | 8.749338 |

|   |           |           |           |
|---|-----------|-----------|-----------|
| C | 1.427384  | -3.920709 | 8.749338  |
| C | -1.427387 | -3.920709 | 8.749339  |
| C | -2.681754 | -3.196520 | 8.749339  |
| C | -4.109116 | -0.724203 | 8.749340  |
| C | -4.109116 | 0.724202  | 8.749340  |
| C | -0.724375 | 4.109295  | 9.996081  |
| C | 0.724373  | 4.109295  | 9.996081  |
| C | 3.196589  | 2.681992  | 9.996082  |
| C | 3.920949  | 1.427327  | 9.996082  |
| C | 3.920949  | -1.427328 | 9.996082  |
| C | 3.196589  | -2.681993 | 9.996082  |
| C | 0.724373  | -4.109297 | 9.996081  |
| C | -0.724375 | -4.109297 | 9.996081  |
| C | -3.196592 | -2.681993 | 9.996082  |
| C | -3.920952 | -1.427328 | 9.996082  |
| C | -3.920952 | 1.427327  | 9.996082  |
| C | -3.196592 | 2.681992  | 9.996082  |
| C | 1.428022  | 3.917014  | 11.247082 |
| C | 2.678230  | 3.195227  | 11.247082 |
| C | 4.106234  | 0.721799  | 11.247082 |
| C | 4.106234  | -0.721801 | 11.247082 |
| C | 2.678230  | -3.195229 | 11.247082 |
| C | 1.428022  | -3.917015 | 11.247082 |
| C | -1.428025 | -3.917015 | 11.247082 |
| C | -2.678233 | -3.195228 | 11.247082 |
| C | -4.106236 | -0.721801 | 11.247082 |
| C | -4.106236 | 0.721799  | 11.247082 |
| C | -2.678233 | 3.195227  | 11.247082 |
| C | -1.428025 | 3.917014  | 11.247082 |
| C | 3.196508  | 2.681721  | 12.498453 |
| C | 3.920674  | 1.427392  | 12.498453 |
| C | 3.920674  | -1.427393 | 12.498453 |
| C | 3.196508  | -2.681722 | 12.498453 |
| C | 0.724179  | -4.109091 | 12.498454 |
| C | -0.724181 | -4.109091 | 12.498454 |
| C | -3.196511 | -2.681722 | 12.498454 |
| C | -3.920677 | -1.427393 | 12.498453 |
| C | -3.920677 | 1.427392  | 12.498453 |
| C | -3.196511 | 2.681721  | 12.498453 |
| C | -0.724181 | 4.109090  | 12.498454 |
| C | 0.724179  | 4.109090  | 12.498454 |
| C | 4.109351  | 0.724424  | 13.745150 |
| C | 4.109351  | -0.724425 | 13.745150 |
| C | 2.682063  | -3.196616 | 13.745151 |
| C | 1.427312  | -3.921027 | 13.745151 |
| C | -1.427314 | -3.921027 | 13.745152 |
| C | -2.682066 | -3.196616 | 13.745151 |
| C | -4.109354 | -0.724425 | 13.745151 |
| C | -4.109354 | 0.724424  | 13.745151 |
| C | -2.682066 | 3.196615  | 13.745151 |
| C | -1.427314 | 3.921025  | 13.745151 |
| C | 1.427312  | 3.921025  | 13.745151 |
| C | 2.682063  | 3.196615  | 13.745151 |
| C | 3.916961  | -1.428033 | 14.996115 |
| C | 3.195209  | -2.678183 | 14.996115 |
| C | 0.721765  | -4.106197 | 14.996116 |
| C | -0.721767 | -4.106197 | 14.996116 |
| C | -3.195211 | -2.678183 | 14.996116 |
| C | -3.916963 | -1.428033 | 14.996116 |
| C | -3.916963 | 1.428032  | 14.996116 |
| C | -3.195211 | 2.678181  | 14.996116 |
| C | -0.721767 | 4.106195  | 14.996115 |
| C | 0.721765  | 4.106195  | 14.996115 |
| C | 3.195209  | 2.678181  | 14.996115 |
| C | 3.916961  | 1.428032  | 14.996115 |
| C | 2.681695  | -3.196504 | 16.247590 |
| C | 1.427398  | -3.920651 | 16.247590 |
| C | -1.427400 | -3.920651 | 16.247590 |
| C | -2.681697 | -3.196504 | 16.247590 |
| C | -4.109072 | -0.724162 | 16.247591 |

|   |           |           |           |
|---|-----------|-----------|-----------|
| C | -4.109072 | 0.724161  | 16.247591 |
| C | -2.681697 | 3.196503  | 16.247590 |
| C | -1.427400 | 3.920650  | 16.247590 |
| C | 1.427398  | 3.920650  | 16.247589 |
| C | 2.681695  | 3.196503  | 16.247589 |
| C | 4.109070  | 0.724161  | 16.247590 |
| C | 4.109070  | -0.724162 | 16.247590 |
| C | 0.724484  | -4.109422 | 17.494218 |
| C | -0.724486 | -4.109422 | 17.494218 |
| C | -3.196645 | -2.682152 | 17.494219 |
| C | -3.921115 | -1.427295 | 17.494219 |
| C | -3.921115 | 1.427294  | 17.494219 |
| C | -3.196645 | 2.682151  | 17.494219 |
| C | -0.724486 | 4.109421  | 17.494218 |
| C | 0.724484  | 4.109421  | 17.494218 |
| C | 3.196643  | 2.682151  | 17.494218 |
| C | 3.921114  | 1.427294  | 17.494218 |
| C | 3.921114  | -1.427295 | 17.494218 |
| C | 3.196643  | -2.682152 | 17.494218 |
| C | -1.428046 | -3.916888 | 18.745154 |
| C | -2.678111 | -3.195184 | 18.745154 |
| C | -4.106137 | -0.721718 | 18.745153 |
| C | -4.106137 | 0.721717  | 18.745153 |
| C | -2.678111 | 3.195183  | 18.745153 |
| C | -1.428046 | 3.916887  | 18.745153 |
| C | 1.428045  | 3.916887  | 18.745153 |
| C | 2.678109  | 3.195183  | 18.745153 |
| C | 4.106136  | 0.721717  | 18.745153 |
| C | 4.106136  | -0.721718 | 18.745153 |
| C | 2.678109  | -3.195184 | 18.745153 |
| C | 1.428045  | -3.916888 | 18.745154 |
| C | -3.196502 | -2.681679 | 19.996750 |
| C | -3.920635 | -1.427407 | 19.996749 |
| C | -3.920635 | 1.427407  | 19.996749 |
| C | -3.196502 | 2.681678  | 19.996749 |
| C | -0.724147 | 4.109061  | 19.996750 |
| C | 0.724146  | 4.109061  | 19.996750 |
| C | 3.196501  | 2.681678  | 19.996749 |
| C | 3.920634  | 1.427407  | 19.996749 |
| C | 3.920634  | -1.427407 | 19.996749 |
| C | 3.196501  | -2.681679 | 19.996749 |
| C | 0.724146  | -4.109062 | 19.996751 |
| C | -0.724147 | -4.109062 | 19.996751 |
| C | -4.109504 | -0.724559 | 21.243278 |
| C | -4.109504 | 0.724558  | 21.243278 |
| C | -2.682257 | 3.196678  | 21.243280 |
| C | -1.427272 | 3.921222  | 21.243280 |
| C | 1.427271  | 3.921222  | 21.243279 |
| C | 2.682255  | 3.196678  | 21.243279 |
| C | 4.109503  | 0.724558  | 21.243278 |
| C | 4.109503  | -0.724559 | 21.243278 |
| C | 2.682255  | -3.196678 | 21.243279 |
| C | 1.427271  | -3.921222 | 21.243280 |
| C | -1.427272 | -3.921222 | 21.243280 |
| C | -2.682257 | -3.196678 | 21.243280 |
| C | -3.916785 | 1.428065  | 22.494190 |
| C | -3.195150 | 2.678011  | 22.494190 |
| C | -0.721649 | 4.106055  | 22.494191 |
| C | 0.721648  | 4.106055  | 22.494190 |
| C | 3.195149  | 2.678010  | 22.494190 |
| C | 3.916784  | 1.428065  | 22.494190 |
| C | 3.916784  | -1.428065 | 22.494190 |
| C | 3.195149  | -2.678011 | 22.494190 |
| C | 0.721649  | -4.106056 | 22.494191 |
| C | -0.721649 | -4.106056 | 22.494191 |
| C | -3.195150 | -2.678011 | 22.494191 |
| C | -3.916785 | -1.428065 | 22.494191 |
| C | -2.681668 | 3.196500  | 23.745939 |
| C | -1.427412 | 3.920622  | 23.745939 |
| C | 1.427412  | 3.920622  | 23.745939 |

|   |           |           |           |
|---|-----------|-----------|-----------|
| C | 2.681667  | 3.196500  | 23.745939 |
| C | 4.109057  | 0.724137  | 23.745939 |
| C | 4.109057  | -0.724138 | 23.745939 |
| C | 2.681667  | -3.196501 | 23.745939 |
| C | 1.427412  | -3.920623 | 23.745939 |
| C | -1.427412 | -3.920623 | 23.745940 |
| C | -2.681668 | -3.196501 | 23.745940 |
| C | -4.109058 | -0.724138 | 23.745940 |
| C | -4.109058 | 0.724137  | 23.745940 |
| C | -0.724651 | 4.109605  | 24.992333 |
| C | 0.724650  | 4.109605  | 24.992333 |
| C | 3.196724  | 2.682388  | 24.992333 |
| C | 3.921362  | 1.427244  | 24.992333 |
| C | 3.921362  | -1.427245 | 24.992333 |
| C | 3.196724  | -2.682388 | 24.992333 |
| C | 0.724650  | -4.109605 | 24.992333 |
| C | -0.724651 | -4.109605 | 24.992333 |
| C | -3.196724 | -2.682388 | 24.992334 |
| C | -3.921362 | -1.427245 | 24.992333 |
| C | -3.921362 | 1.427244  | 24.992333 |
| C | -3.196724 | 2.682388  | 24.992334 |
| C | 1.428091  | 3.916634  | 26.243231 |
| C | 2.677872  | 3.195096  | 26.243230 |
| C | 4.105947  | 0.721554  | 26.243229 |
| C | 4.105947  | -0.721554 | 26.243230 |
| C | 2.677872  | -3.195097 | 26.243231 |
| C | 1.428091  | -3.916635 | 26.243231 |
| C | -1.428091 | -3.916635 | 26.243232 |
| C | -2.677873 | -3.195097 | 26.243231 |
| C | -4.105948 | -0.721554 | 26.243230 |
| C | -4.105948 | 0.721554  | 26.243230 |
| C | -2.677873 | 3.195096  | 26.243231 |
| C | -1.428091 | 3.916634  | 26.243231 |
| C | 3.196510  | 2.681667  | 27.495175 |
| C | 3.920632  | 1.427418  | 27.495175 |
| C | 3.920632  | -1.427418 | 27.495175 |
| C | 3.196510  | -2.681667 | 27.495176 |
| C | 0.724134  | -4.109057 | 27.495178 |
| C | -0.724134 | -4.109057 | 27.495178 |
| C | -3.196510 | -2.681667 | 27.495176 |
| C | -3.920632 | -1.427418 | 27.495176 |
| C | -3.920632 | 1.427418  | 27.495176 |
| C | -3.196510 | 2.681667  | 27.495176 |
| C | -0.724135 | 4.109057  | 27.495178 |
| C | 0.724134  | 4.109057  | 27.495178 |
| C | 4.109749  | 0.724771  | 28.741374 |
| C | 4.109749  | -0.724771 | 28.741374 |
| C | 2.682561  | -3.196777 | 28.741377 |
| C | 1.427208  | -3.921531 | 28.741378 |
| C | -1.427208 | -3.921531 | 28.741378 |
| C | -2.682561 | -3.196777 | 28.741377 |
| C | -4.109749 | -0.724771 | 28.741375 |
| C | -4.109749 | 0.724771  | 28.741375 |
| C | -2.682561 | 3.196777  | 28.741377 |
| C | -1.427208 | 3.921531  | 28.741377 |
| C | 1.427208  | 3.921531  | 28.741377 |
| C | 2.682561  | 3.196777  | 28.741376 |
| C | 3.916432  | -1.428127 | 29.992266 |
| C | 3.195027  | -2.677668 | 29.992267 |
| C | 0.721416  | -4.105770 | 29.992268 |
| C | -0.721415 | -4.105770 | 29.992268 |
| C | -3.195027 | -2.677667 | 29.992268 |
| C | -3.916432 | -1.428127 | 29.992267 |
| C | -3.916432 | 1.428127  | 29.992267 |
| C | -3.195027 | 2.677668  | 29.992267 |
| C | -0.721415 | 4.105770  | 29.992268 |
| C | 0.721416  | 4.105770  | 29.992268 |
| C | 3.195027  | 2.677668  | 29.992267 |
| C | 3.916432  | 1.428127  | 29.992266 |
| C | 2.681683  | -3.196513 | 31.244479 |

|   |           |           |           |
|---|-----------|-----------|-----------|
| C | 1.427420  | -3.920636 | 31.244480 |
| C | -1.427419 | -3.920636 | 31.244480 |
| C | -2.681682 | -3.196513 | 31.244479 |
| C | -4.109085 | -0.724141 | 31.244479 |
| C | -4.109085 | 0.724141  | 31.244479 |
| C | -2.681682 | 3.196514  | 31.244479 |
| C | -1.427419 | 3.920636  | 31.244479 |
| C | 1.427420  | 3.920636  | 31.244479 |
| C | 2.681683  | 3.196514  | 31.244478 |
| C | 4.109086  | 0.724141  | 31.244478 |
| C | 4.109086  | -0.724141 | 31.244478 |
| C | 0.724941  | -4.109913 | 32.490403 |
| C | -0.724940 | -4.109913 | 32.490403 |
| C | -3.196857 | -2.682795 | 32.490403 |
| C | -3.921787 | -1.427152 | 32.490402 |
| C | -3.921787 | 1.427152  | 32.490402 |
| C | -3.196857 | 2.682795  | 32.490403 |
| C | -0.724940 | 4.109914  | 32.490403 |
| C | 0.724941  | 4.109914  | 32.490403 |
| C | 3.196858  | 2.682795  | 32.490402 |
| C | 3.921788  | 1.427152  | 32.490401 |
| C | 3.921788  | -1.427152 | 32.490401 |
| C | 3.196858  | -2.682795 | 32.490402 |
| C | -1.428182 | -3.916087 | 33.741291 |
| C | -2.677361 | -3.194902 | 33.741290 |
| C | -4.105534 | -0.721204 | 33.741289 |
| C | -4.105534 | 0.721205  | 33.741289 |
| C | -2.677361 | 3.194903  | 33.741290 |
| C | -1.428182 | 3.916087  | 33.741291 |
| C | 1.428183  | 3.916087  | 33.741291 |
| C | 2.677362  | 3.194903  | 33.741290 |
| C | 4.105535  | 0.721205  | 33.741288 |
| C | 4.105535  | -0.721204 | 33.741288 |
| C | 2.677362  | -3.194902 | 33.741290 |
| C | 1.428183  | -3.916087 | 33.741291 |
| C | -3.196504 | -2.681682 | 34.993906 |
| C | -3.920651 | -1.427399 | 34.993905 |
| C | -3.920651 | 1.427400  | 34.993905 |
| C | -3.196504 | 2.681683  | 34.993906 |
| C | -0.724154 | 4.109048  | 34.993908 |
| C | 0.724156  | 4.109048  | 34.993908 |
| C | 3.196505  | 2.681683  | 34.993905 |
| C | 3.920653  | 1.427400  | 34.993904 |
| C | 3.920653  | -1.427399 | 34.993904 |
| C | 3.196505  | -2.681682 | 34.993905 |
| C | 0.724156  | -4.109047 | 34.993909 |
| C | -0.724154 | -4.109047 | 34.993909 |
| C | -4.110190 | -0.725203 | 36.239405 |
| C | -4.110191 | 0.725204  | 36.239405 |
| C | -2.683154 | 3.196929  | 36.239407 |
| C | -1.427048 | 3.922112  | 36.239408 |
| C | 1.427050  | 3.922112  | 36.239407 |
| C | 2.683156  | 3.196929  | 36.239406 |
| C | 4.110192  | 0.725204  | 36.239404 |
| C | 4.110192  | -0.725203 | 36.239404 |
| C | 2.683156  | -3.196928 | 36.239407 |
| C | 1.427050  | -3.922111 | 36.239408 |
| C | -1.427048 | -3.922111 | 36.239408 |
| C | -2.683154 | -3.196928 | 36.239407 |
| C | -3.915564 | 1.428275  | 37.490277 |
| C | -3.194721 | 2.676830  | 37.490277 |
| C | -0.720847 | 4.105072  | 37.490278 |
| C | 0.720849  | 4.105072  | 37.490278 |
| C | 3.194723  | 2.676830  | 37.490277 |
| C | 3.915566  | 1.428275  | 37.490276 |
| C | 3.915566  | -1.428273 | 37.490276 |
| C | 3.194723  | -2.676828 | 37.490277 |
| C | 0.720849  | -4.105071 | 37.490279 |
| C | -0.720847 | -4.105071 | 37.490279 |
| C | -3.194721 | -2.676828 | 37.490278 |

|   |           |           |           |
|---|-----------|-----------|-----------|
| C | -3.915564 | -1.428273 | 37.490277 |
| C | -2.681886 | 3.196664  | 38.743611 |
| C | -1.427454 | 3.920876  | 38.743612 |
| C | 1.427457  | 3.920876  | 38.743611 |
| C | 2.681888  | 3.196664  | 38.743611 |
| C | 4.109336  | 0.724237  | 38.743612 |
| C | 4.109336  | -0.724236 | 38.743612 |
| C | 2.681888  | -3.196663 | 38.743611 |
| C | 1.427457  | -3.920875 | 38.743612 |
| C | -1.427454 | -3.920875 | 38.743612 |
| C | -2.681886 | -3.196663 | 38.743612 |
| C | -4.109333 | -0.724235 | 38.743613 |
| C | -4.109333 | 0.724237  | 38.743612 |
| C | -0.725791 | 4.111303  | 39.988343 |
| C | 0.725793  | 4.111303  | 39.988343 |
| C | 3.197655  | 2.684232  | 39.988342 |
| C | 3.923443  | 1.427116  | 39.988343 |
| C | 3.923443  | -1.427115 | 39.988343 |
| C | 3.197655  | -2.684230 | 39.988343 |
| C | 0.725794  | -4.111302 | 39.988343 |
| C | -0.725791 | -4.111302 | 39.988343 |
| C | -3.197652 | -2.684230 | 39.988344 |
| C | -3.923440 | -1.427115 | 39.988344 |
| C | -3.923440 | 1.427116  | 39.988344 |
| C | -3.197652 | 2.684232  | 39.988343 |
| C | 1.428835  | 3.915067  | 41.238987 |
| C | 2.676168  | 3.194955  | 41.238987 |
| C | 4.105003  | 0.720137  | 41.238987 |
| C | 4.105003  | -0.720135 | 41.238987 |
| C | 2.676168  | -3.194954 | 41.238987 |
| C | 1.428835  | -3.915065 | 41.238988 |
| C | -1.428833 | -3.915065 | 41.238988 |
| C | -2.676165 | -3.194954 | 41.238988 |
| C | -4.105000 | -0.720135 | 41.238988 |
| C | -4.105000 | 0.720137  | 41.238988 |
| C | -2.676165 | 3.194955  | 41.238988 |
| C | -1.428833 | 3.915067  | 41.238987 |
| C | 3.195925  | 2.681308  | 42.493818 |
| C | 3.920054  | 1.427074  | 42.493821 |
| C | 3.920054  | -1.427072 | 42.493821 |
| C | 3.195925  | -2.681307 | 42.493818 |
| C | 0.724133  | -4.108339 | 42.493821 |
| C | -0.724129 | -4.108339 | 42.493821 |
| C | -3.195922 | -2.681307 | 42.493819 |
| C | -3.920051 | -1.427072 | 42.493822 |
| C | -3.920051 | 1.427074  | 42.493822 |
| C | -3.195922 | 2.681309  | 42.493819 |
| C | -0.724129 | 4.108341  | 42.493820 |
| C | 0.724132  | 4.108341  | 42.493820 |
| C | 4.106780  | 0.726133  | 43.736894 |
| C | 4.106780  | -0.726131 | 43.736894 |
| C | 2.682249  | -3.193481 | 43.736890 |
| C | 1.424535  | -3.919591 | 43.736889 |
| C | -1.424531 | -3.919591 | 43.736889 |
| C | -2.682246 | -3.193481 | 43.736891 |
| C | -4.106776 | -0.726131 | 43.736895 |
| C | -4.106776 | 0.726133  | 43.736895 |
| C | -2.682246 | 3.193483  | 43.736890 |
| C | -1.424531 | 3.919593  | 43.736889 |
| C | 1.424535  | 3.919593  | 43.736889 |
| C | 2.682249  | 3.193483  | 43.736890 |
| C | 3.899566  | -1.424239 | 44.987252 |
| C | 3.183230  | -2.664960 | 44.987241 |
| C | 0.716329  | -4.089181 | 44.987238 |
| C | -0.716325 | -4.089181 | 44.987238 |
| C | -3.183227 | -2.664960 | 44.987241 |
| C | -3.899562 | -1.424239 | 44.987253 |
| C | -3.899562 | 1.424242  | 44.987252 |
| C | -3.183227 | 2.664963  | 44.987241 |
| C | -0.716325 | 4.089183  | 44.987237 |



|   |           |           |            |
|---|-----------|-----------|------------|
| C | 0.716329  | 4.089183  | 44.987237  |
| C | 3.183230  | 2.664963  | 44.987240  |
| C | 3.899566  | 1.424242  | 44.987252  |
| C | 2.677127  | -3.186176 | 46.250088  |
| C | 1.420750  | -3.911508 | 46.250092  |
| C | -1.420746 | -3.911508 | 46.250093  |
| C | -2.677123 | -3.186176 | 46.250089  |
| C | -4.097873 | -0.725357 | 46.250120  |
| C | -4.097873 | 0.725359  | 46.250120  |
| C | -2.677123 | 3.186179  | 46.250088  |
| C | -1.420746 | 3.911510  | 46.250092  |
| C | 1.420750  | 3.911510  | 46.250092  |
| C | 2.677127  | 3.186179  | 46.250088  |
| C | 4.097877  | 0.725359  | 46.250119  |
| C | 4.097877  | -0.725357 | 46.250119  |
| C | 0.737116  | -4.151239 | 47.490193  |
| C | -0.737112 | -4.151239 | 47.490193  |
| C | -3.226568 | -2.714024 | 47.490192  |
| C | -3.963636 | -1.437278 | 47.490217  |
| C | -3.963636 | 1.437280  | 47.490217  |
| C | -3.226568 | 2.714026  | 47.490191  |
| C | -0.737112 | 4.151242  | 47.490192  |
| C | 0.737116  | 4.151242  | 47.490192  |
| C | 3.226573  | 2.714026  | 47.490191  |
| C | 3.963640  | 1.437280  | 47.490216  |
| C | 3.963640  | -1.437278 | 47.490216  |
| C | 3.226573  | -2.714024 | 47.490191  |
| C | -1.506833 | -3.996756 | 48.702727  |
| C | -2.707880 | -3.303359 | 48.702724  |
| C | -4.214498 | -0.693415 | 48.702781  |
| C | -4.214498 | 0.693418  | 48.702781  |
| C | -2.707880 | 3.303362  | 48.702723  |
| C | -1.506833 | 3.996759  | 48.702727  |
| C | 1.506837  | 3.996759  | 48.702726  |
| C | 2.707884  | 3.303362  | 48.702723  |
| C | 4.214503  | 0.693418  | 48.702780  |
| C | 4.214503  | -0.693415 | 48.702780  |
| C | 2.707884  | -3.303359 | 48.702723  |
| C | 1.506837  | -3.996756 | 48.702727  |
| H | 1.074281  | 4.313374  | -49.660461 |
| H | 3.198359  | 3.087049  | -49.660458 |
| H | 4.272265  | 1.226337  | -49.660523 |
| H | 4.272265  | -1.226334 | -49.660523 |
| H | 3.198359  | -3.087046 | -49.660458 |
| H | 1.074281  | -4.313371 | -49.660462 |
| H | -1.074276 | -4.313371 | -49.660462 |
| H | -3.198354 | -3.087046 | -49.660459 |
| H | -4.272260 | -1.226334 | -49.660524 |
| H | -4.272260 | 1.226337  | -49.660524 |
| H | -3.198354 | 3.087049  | -49.660459 |
| H | -1.074276 | 4.313374  | -49.660462 |
| H | -1.074276 | -4.313371 | 49.660462  |
| H | -3.198354 | -3.087046 | 49.660459  |
| H | -4.272260 | -1.226334 | 49.660524  |
| H | -4.272260 | 1.226337  | 49.660524  |
| H | -3.198354 | 3.087049  | 49.660459  |
| H | -1.074276 | 4.313374  | 49.660462  |
| H | 1.074281  | 4.313374  | 49.660461  |
| H | 3.198359  | 3.087049  | 49.660458  |
| H | 4.272265  | 1.226337  | 49.660523  |
| H | 4.272265  | -1.226334 | 49.660523  |
| H | 3.198359  | -3.087046 | 49.660458  |
| H | 1.074281  | -4.313371 | 49.660462  |

Nanotube (6,6) u40v0s  
B3LYP/STO-3G Energy: -36156.064276

|   |             |              |              |
|---|-------------|--------------|--------------|
| C | 4.211679000 | -0.691631000 | 49.359524000 |
|---|-------------|--------------|--------------|

|   |              |              |              |
|---|--------------|--------------|--------------|
| C | 4.211679000  | 0.691631000  | 49.359524000 |
| C | 2.704809000  | 3.301606000  | 49.359524000 |
| C | 1.506870000  | 3.993237000  | 49.359524000 |
| C | -1.506870000 | 3.993237000  | 49.359524000 |
| C | -2.704809000 | 3.301606000  | 49.359524000 |
| C | -4.211679000 | 0.691631000  | 49.359524000 |
| C | -4.211679000 | -0.691631000 | 49.359524000 |
| C | -2.704809000 | -3.301606000 | 49.359524000 |
| C | -1.506870000 | -3.993237000 | 49.359524000 |
| C | 1.506870000  | -3.993237000 | 49.359524000 |
| C | 2.704809000  | -3.301606000 | 49.359524000 |
| C | 3.957913000  | 1.437268000  | 48.143309000 |
| C | 3.223667000  | 2.709020000  | 48.143309000 |
| C | 0.734246000  | 4.146288000  | 48.143309000 |
| C | -0.734246000 | 4.146288000  | 48.143309000 |
| C | -3.223667000 | 2.709020000  | 48.143309000 |
| C | -3.957913000 | 1.437268000  | 48.143309000 |
| C | -3.957913000 | -1.437268000 | 48.143309000 |
| C | -3.223667000 | -2.709020000 | 48.143309000 |
| C | -0.734246000 | -4.146288000 | 48.143309000 |
| C | 0.734246000  | -4.146288000 | 48.143309000 |
| C | 3.223667000  | -2.709020000 | 48.143309000 |
| C | 3.957913000  | -1.437268000 | 48.143309000 |
| C | 2.677782000  | 3.185812000  | 46.902940000 |
| C | 1.420103000  | 3.911933000  | 46.902940000 |
| C | -1.420103000 | 3.911933000  | 46.902940000 |
| C | -2.677782000 | 3.185812000  | 46.902940000 |
| C | -4.097885000 | 0.726121000  | 46.902940000 |
| C | -4.097885000 | -0.726121000 | 46.902940000 |
| C | -2.677782000 | -3.185812000 | 46.902940000 |
| C | -1.420103000 | -3.911933000 | 46.902940000 |
| C | 1.420103000  | -3.911933000 | 46.902940000 |
| C | 2.677782000  | -3.185812000 | 46.902940000 |
| C | 4.097885000  | -0.726121000 | 46.902940000 |
| C | 4.097885000  | 0.726121000  | 46.902940000 |
| C | 0.715010000  | 4.086662000  | 45.642118000 |
| C | -0.715010000 | 4.086662000  | 45.642118000 |
| C | -3.181648000 | 2.662548000  | 45.642118000 |
| C | -3.896658000 | 1.424114000  | 45.642118000 |
| C | -3.896658000 | -1.424114000 | 45.642118000 |
| C | -3.181648000 | -2.662548000 | 45.642118000 |
| C | -0.715010000 | -4.086662000 | 45.642118000 |
| C | 0.715010000  | -4.086662000 | 45.642118000 |
| C | 3.181648000  | -2.662548000 | 45.642118000 |
| C | 3.896658000  | -1.424114000 | 45.642118000 |
| C | 3.896658000  | 1.424114000  | 45.642118000 |
| C | 3.181648000  | 2.662548000  | 45.642118000 |
| C | -1.424737000 | 3.914111000  | 44.387711000 |
| C | -2.677351000 | 3.190914000  | 44.387711000 |
| C | -4.102089000 | 0.723197000  | 44.387711000 |
| C | -4.102089000 | -0.723197000 | 44.387711000 |
| C | -2.677351000 | -3.190914000 | 44.387711000 |
| C | -1.424737000 | -3.914111000 | 44.387711000 |
| C | 1.424737000  | -3.914111000 | 44.387711000 |
| C | 2.677351000  | -3.190914000 | 44.387711000 |
| C | 4.102089000  | -0.723197000 | 44.387711000 |
| C | 4.102089000  | 0.723197000  | 44.387711000 |
| C | 2.677351000  | 3.190914000  | 44.387711000 |
| C | 1.424737000  | 3.914111000  | 44.387711000 |
| C | -3.195395000 | 2.682000000  | 43.143877000 |
| C | -3.920378000 | 1.426293000  | 43.143877000 |
| C | -3.920378000 | -1.426293000 | 43.143877000 |
| C | -3.195395000 | -2.682000000 | 43.143877000 |
| C | -0.724983000 | -4.108294000 | 43.143877000 |
| C | 0.724983000  | -4.108294000 | 43.143877000 |
| C | 3.195395000  | -2.682000000 | 43.143877000 |
| C | 3.920378000  | -1.426293000 | 43.143877000 |
| C | 3.920378000  | 1.426293000  | 43.143877000 |
| C | 3.195395000  | 2.682000000  | 43.143877000 |
| C | 0.724983000  | 4.108294000  | 43.143877000 |

|   |              |              |              |
|---|--------------|--------------|--------------|
| C | -0.724983000 | 4.108294000  | 43.143877000 |
| C | -4.102668000 | 0.719128000  | 41.891834000 |
| C | -4.102668000 | -0.719128000 | 41.891834000 |
| C | -2.674118000 | -3.193451000 | 41.891834000 |
| C | -1.428551000 | -3.912579000 | 41.891834000 |
| C | 1.428551000  | -3.912579000 | 41.891834000 |
| C | 2.674118000  | -3.193451000 | 41.891834000 |
| C | 4.102668000  | -0.719128000 | 41.891834000 |
| C | 4.102668000  | 0.719128000  | 41.891834000 |
| C | 2.674118000  | 3.193451000  | 41.891834000 |
| C | 1.428551000  | 3.912579000  | 41.891834000 |
| C | -1.428551000 | 3.912579000  | 41.891834000 |
| C | -2.674118000 | 3.193451000  | 41.891834000 |
| C | -3.917194000 | -1.427453000 | 40.637107000 |
| C | -3.194808000 | -2.678663000 | 40.637107000 |
| C | -0.722386000 | -4.106116000 | 40.637107000 |
| C | 0.722386000  | -4.106116000 | 40.637107000 |
| C | 3.194808000  | -2.678663000 | 40.637107000 |
| C | 3.917194000  | -1.427453000 | 40.637107000 |
| C | 3.917194000  | 1.427453000  | 40.637107000 |
| C | 3.194808000  | 2.678663000  | 40.637107000 |
| C | 0.722386000  | 4.106116000  | 40.637107000 |
| C | -0.722386000 | 4.106116000  | 40.637107000 |
| C | -3.194808000 | 2.678663000  | 40.637107000 |
| C | -3.917194000 | 1.427453000  | 40.637107000 |
| C | -2.682574000 | -3.196179000 | 39.390811000 |
| C | -1.426685000 | -3.921266000 | 39.390811000 |
| C | 1.426685000  | -3.921266000 | 39.390811000 |
| C | 2.682574000  | -3.196179000 | 39.390811000 |
| C | 4.109259000  | -0.725088000 | 39.390811000 |
| C | 4.109259000  | 0.725088000  | 39.390811000 |
| C | 2.682574000  | 3.196179000  | 39.390811000 |
| C | 1.426685000  | 3.921266000  | 39.390811000 |
| C | -1.426685000 | 3.921266000  | 39.390811000 |
| C | -2.682574000 | 3.196179000  | 39.390811000 |
| C | -4.109259000 | 0.725088000  | 39.390811000 |
| C | -4.109259000 | -0.725088000 | 39.390811000 |
| C | -0.720347000 | -4.103469000 | 38.141020000 |
| C | 0.720347000  | -4.103469000 | 38.141020000 |
| C | 3.193535000  | -2.675573000 | 38.141020000 |
| C | 3.913881000  | -1.427896000 | 38.141020000 |
| C | 3.913881000  | 1.427896000  | 38.141020000 |
| C | 3.193535000  | 2.675573000  | 38.141020000 |
| C | 0.720347000  | 4.103469000  | 38.141020000 |
| C | -0.720347000 | 4.103469000  | 38.141020000 |
| C | -3.193535000 | 2.675573000  | 38.141020000 |
| C | -3.913881000 | 1.427896000  | 38.141020000 |
| C | -3.913881000 | -1.427896000 | 38.141020000 |
| C | -3.193535000 | -2.675573000 | 38.141020000 |
| C | 1.427500000  | -3.915294000 | 36.886251000 |
| C | 2.676994000  | -3.193898000 | 36.886251000 |
| C | 4.104494000  | -0.721396000 | 36.886251000 |
| C | 4.104494000  | 0.721396000  | 36.886251000 |
| C | 2.676994000  | 3.193898000  | 36.886251000 |
| C | 1.427500000  | 3.915294000  | 36.886251000 |
| C | -1.427500000 | 3.915294000  | 36.886251000 |
| C | -2.676994000 | 3.193898000  | 36.886251000 |
| C | -4.104494000 | 0.721396000  | 36.886251000 |
| C | -4.104494000 | -0.721396000 | 36.886251000 |
| C | -2.676994000 | -3.193898000 | 36.886251000 |
| C | -1.427500000 | -3.915294000 | 36.886251000 |
| C | 3.195900000  | -2.682115000 | 35.638266000 |
| C | 3.920729000  | -1.426673000 | 35.638266000 |
| C | 3.920729000  | 1.426673000  | 35.638266000 |
| C | 3.195900000  | 2.682115000  | 35.638266000 |
| C | 0.724830000  | 4.108788000  | 35.638266000 |
| C | -0.724830000 | 4.108788000  | 35.638266000 |
| C | -3.195900000 | 2.682115000  | 35.638266000 |
| C | -3.920729000 | 1.426673000  | 35.638266000 |
| C | -3.920729000 | -1.426673000 | 35.638266000 |

|   |              |              |              |
|---|--------------|--------------|--------------|
| C | -3.195900000 | -2.682115000 | 35.638266000 |
| C | -0.724830000 | -4.108788000 | 35.638266000 |
| C | 0.724830000  | -4.108788000 | 35.638266000 |
| C | 4.104579000  | -0.721271000 | 34.389793000 |
| C | 4.104579000  | 0.721271000  | 34.389793000 |
| C | 2.676928000  | 3.194035000  | 34.389793000 |
| C | 1.427651000  | 3.915305000  | 34.389793000 |
| C | -1.427651000 | 3.915305000  | 34.389793000 |
| C | -2.676928000 | 3.194035000  | 34.389793000 |
| C | -4.104579000 | 0.721271000  | 34.389793000 |
| C | -4.104579000 | -0.721271000 | 34.389793000 |
| C | -2.676928000 | -3.194035000 | 34.389793000 |
| C | -1.427651000 | -3.915305000 | 34.389793000 |
| C | 1.427651000  | -3.915305000 | 34.389793000 |
| C | 2.676928000  | -3.194035000 | 34.389793000 |
| C | 3.914506000  | 1.427697000  | 33.135448000 |
| C | 3.193675000  | 2.676213000  | 33.135448000 |
| C | 0.720831000  | 4.103911000  | 33.135448000 |
| C | -0.720831000 | 4.103911000  | 33.135448000 |
| C | -3.193675000 | 2.676213000  | 33.135448000 |
| C | -3.914506000 | 1.427697000  | 33.135448000 |
| C | -3.914506000 | -1.427697000 | 33.135448000 |
| C | -3.193675000 | -2.676213000 | 33.135448000 |
| C | -0.720831000 | -4.103911000 | 33.135448000 |
| C | 0.720831000  | -4.103911000 | 33.135448000 |
| C | 3.193675000  | -2.676213000 | 33.135448000 |
| C | 3.914506000  | -1.427697000 | 33.135448000 |
| C | 2.681627000  | 3.195738000  | 31.886062000 |
| C | 1.426777000  | 3.920227000  | 31.886062000 |
| C | -1.426777000 | 3.920227000  | 31.886062000 |
| C | -2.681627000 | 3.195738000  | 31.886062000 |
| C | -4.108404000 | 0.724488000  | 31.886062000 |
| C | -4.108404000 | -0.724488000 | 31.886062000 |
| C | -2.681627000 | -3.195738000 | 31.886062000 |
| C | -1.426777000 | -3.920227000 | 31.886062000 |
| C | 1.426777000  | -3.920227000 | 31.886062000 |
| C | 2.681627000  | -3.195738000 | 31.886062000 |
| C | 4.108404000  | -0.724488000 | 31.886062000 |
| C | 4.108404000  | 0.724488000  | 31.886062000 |
| C | 0.722075000  | 4.105558000  | 30.638382000 |
| C | -0.722075000 | 4.105558000  | 30.638382000 |
| C | -3.194480000 | 2.678114000  | 30.638382000 |
| C | -3.916555000 | 1.427444000  | 30.638382000 |
| C | -3.916555000 | -1.427444000 | 30.638382000 |
| C | -3.194480000 | -2.678114000 | 30.638382000 |
| C | -0.722075000 | -4.105558000 | 30.638382000 |
| C | 0.722075000  | -4.105558000 | 30.638382000 |
| C | 3.194480000  | -2.678114000 | 30.638382000 |
| C | 3.916555000  | -1.427444000 | 30.638382000 |
| C | 3.916555000  | 1.427444000  | 30.638382000 |
| C | 3.194480000  | 2.678114000  | 30.638382000 |
| C | -1.427803000 | 3.914029000  | 29.384711000 |
| C | -2.675747000 | 3.193529000  | 29.384711000 |
| C | -4.103551000 | 0.720501000  | 29.384711000 |
| C | -4.103551000 | -0.720501000 | 29.384711000 |
| C | -2.675747000 | -3.193529000 | 29.384711000 |
| C | -1.427803000 | -3.914029000 | 29.384711000 |
| C | 1.427803000  | -3.914029000 | 29.384711000 |
| C | 2.675747000  | -3.193529000 | 29.384711000 |
| C | 4.103551000  | -0.720501000 | 29.384711000 |
| C | 4.103551000  | 0.720501000  | 29.384711000 |
| C | 2.675747000  | 3.193529000  | 29.384711000 |
| C | 1.427803000  | 3.914029000  | 29.384711000 |
| C | -3.195479000 | 2.680936000  | 28.134085000 |
| C | -3.919498000 | 1.426898000  | 28.134085000 |
| C | -3.919498000 | -1.426898000 | 28.134085000 |
| C | -3.195479000 | -2.680936000 | 28.134085000 |
| C | -0.724019000 | -4.107834000 | 28.134085000 |
| C | 0.724019000  | -4.107834000 | 28.134085000 |
| C | 3.195479000  | -2.680936000 | 28.134085000 |

|   |              |              |              |
|---|--------------|--------------|--------------|
| C | 3.919498000  | -1.426898000 | 28.134085000 |
| C | 3.919498000  | 1.426898000  | 28.134085000 |
| C | 3.195479000  | 2.680936000  | 28.134085000 |
| C | 0.724019000  | 4.107834000  | 28.134085000 |
| C | -0.724019000 | 4.107834000  | 28.134085000 |
| C | -4.106394000 | 0.722770000  | 26.886804000 |
| C | -4.106394000 | -0.722770000 | 26.886804000 |
| C | -2.679134000 | -3.194856000 | 26.886804000 |
| C | -1.427259000 | -3.917627000 | 26.886804000 |
| C | 1.427259000  | -3.917627000 | 26.886804000 |
| C | 2.679134000  | -3.194856000 | 26.886804000 |
| C | 4.106394000  | -0.722770000 | 26.886804000 |
| C | 4.106394000  | 0.722770000  | 26.886804000 |
| C | 2.679134000  | 3.194856000  | 26.886804000 |
| C | 1.427259000  | 3.917627000  | 26.886804000 |
| C | -1.427259000 | 3.917627000  | 26.886804000 |
| C | -2.679134000 | 3.194856000  | 26.886804000 |
| C | -3.913860000 | -1.427845000 | 25.633997000 |
| C | -3.193480000 | -2.675580000 | 25.633997000 |
| C | -0.720380000 | -4.103425000 | 25.633997000 |
| C | 0.720380000  | -4.103425000 | 25.633997000 |
| C | 3.193480000  | -2.675580000 | 25.633997000 |
| C | 3.913860000  | -1.427845000 | 25.633997000 |
| C | 3.913860000  | 1.427845000  | 25.633997000 |
| C | 3.193480000  | 2.675580000  | 25.633997000 |
| C | 0.720380000  | 4.103425000  | 25.633997000 |
| C | -0.720380000 | 4.103425000  | 25.633997000 |
| C | -3.193480000 | 2.675580000  | 25.633997000 |
| C | -3.913860000 | 1.427845000  | 25.633997000 |
| C | -2.680106000 | -3.195169000 | 24.382314000 |
| C | -1.427045000 | -3.918624000 | 24.382314000 |
| C | 1.427045000  | -3.918624000 | 24.382314000 |
| C | 2.680106000  | -3.195169000 | 24.382314000 |
| C | 4.107150000  | -0.723455000 | 24.382314000 |
| C | 4.107150000  | 0.723455000  | 24.382314000 |
| C | 2.680106000  | 3.195169000  | 24.382314000 |
| C | 1.427045000  | 3.918624000  | 24.382314000 |
| C | -1.427045000 | 3.918624000  | 24.382314000 |
| C | -2.680106000 | 3.195169000  | 24.382314000 |
| C | -4.107150000 | 0.723455000  | 24.382314000 |
| C | -4.107150000 | -0.723455000 | 24.382314000 |
| C | -0.723345000 | -4.107077000 | 23.135081000 |
| C | 0.723345000  | -4.107077000 | 23.135081000 |
| C | 3.195161000  | -2.679974000 | 23.135081000 |
| C | 3.918506000  | -1.427104000 | 23.135081000 |
| C | 3.918506000  | 1.427104000  | 23.135081000 |
| C | 3.195161000  | 2.679974000  | 23.135081000 |
| C | 0.723345000  | 4.107077000  | 23.135081000 |
| C | -0.723345000 | 4.107077000  | 23.135081000 |
| C | -3.195161000 | 2.679974000  | 23.135081000 |
| C | -3.918506000 | 1.427104000  | 23.135081000 |
| C | -3.918506000 | -1.427104000 | 23.135081000 |
| C | -3.195161000 | -2.679974000 | 23.135081000 |
| C | 1.427831000  | -3.913981000 | 21.883260000 |
| C | 2.675692000  | -3.193529000 | 21.883260000 |
| C | 4.103523000  | -0.720452000 | 21.883260000 |
| C | 4.103523000  | 0.720452000  | 21.883260000 |
| C | 2.675692000  | 3.193529000  | 21.883260000 |
| C | 1.427831000  | 3.913981000  | 21.883260000 |
| C | -1.427831000 | 3.913981000  | 21.883260000 |
| C | -2.675692000 | 3.193529000  | 21.883260000 |
| C | -4.103523000 | 0.720452000  | 21.883260000 |
| C | -4.103523000 | -0.720452000 | 21.883260000 |
| C | -2.675692000 | -3.193529000 | 21.883260000 |
| C | -1.427831000 | -3.913981000 | 21.883260000 |
| C | 3.194829000  | -2.679199000 | 20.630741000 |
| C | 3.917669000  | -1.427204000 | 20.630741000 |
| C | 3.917669000  | 1.427204000  | 20.630741000 |
| C | 3.194829000  | 2.679199000  | 20.630741000 |
| C | 0.722840000  | 4.106403000  | 20.630741000 |

|   |              |              |              |
|---|--------------|--------------|--------------|
| C | -0.722840000 | 4.106403000  | 20.630741000 |
| C | -3.194829000 | 2.679199000  | 20.630741000 |
| C | -3.917669000 | 1.427204000  | 20.630741000 |
| C | -3.917669000 | -1.427204000 | 20.630741000 |
| C | -3.194829000 | -2.679199000 | 20.630741000 |
| C | -0.722840000 | -4.106403000 | 20.630741000 |
| C | 0.722840000  | -4.106403000 | 20.630741000 |
| C | 4.107580000  | -0.723773000 | 19.383234000 |
| C | 4.107580000  | 0.723773000  | 19.383234000 |
| C | 2.680595000  | 3.195382000  | 19.383234000 |
| C | 1.426984000  | 3.919155000  | 19.383234000 |
| C | -1.426984000 | 3.919155000  | 19.383234000 |
| C | -2.680595000 | 3.195382000  | 19.383234000 |
| C | -4.107580000 | 0.723773000  | 19.383234000 |
| C | -4.107580000 | -0.723773000 | 19.383234000 |
| C | -2.680595000 | -3.195382000 | 19.383234000 |
| C | -1.426984000 | -3.919155000 | 19.383234000 |
| C | 1.426984000  | -3.919155000 | 19.383234000 |
| C | 2.680595000  | -3.195382000 | 19.383234000 |
| C | 3.914369000  | 1.427767000  | 18.132447000 |
| C | 3.193667000  | 2.676060000  | 18.132447000 |
| C | 0.720703000  | 4.103827000  | 18.132447000 |
| C | -0.720703000 | 4.103827000  | 18.132447000 |
| C | -3.193667000 | 2.676060000  | 18.132447000 |
| C | -3.914369000 | 1.427767000  | 18.132447000 |
| C | -3.914369000 | -1.427767000 | 18.132447000 |
| C | -3.193667000 | -2.676060000 | 18.132447000 |
| C | -0.720703000 | -4.103827000 | 18.132447000 |
| C | 0.720703000  | -4.103827000 | 18.132447000 |
| C | 3.193667000  | -2.676060000 | 18.132447000 |
| C | 3.914369000  | -1.427767000 | 18.132447000 |
| C | 2.678287000  | 3.194489000  | 16.879360000 |
| C | 1.427365000  | 3.916709000  | 16.879360000 |
| C | -1.427365000 | 3.916709000  | 16.879360000 |
| C | -2.678287000 | 3.194489000  | 16.879360000 |
| C | -4.105652000 | 0.722220000  | 16.879360000 |
| C | -4.105652000 | -0.722220000 | 16.879360000 |
| C | -2.678287000 | -3.194489000 | 16.879360000 |
| C | -1.427365000 | -3.916709000 | 16.879360000 |
| C | 1.427365000  | -3.916709000 | 16.879360000 |
| C | 2.678287000  | -3.194489000 | 16.879360000 |
| C | 4.105652000  | -0.722220000 | 16.879360000 |
| C | 4.105652000  | 0.722220000  | 16.879360000 |
| C | 0.724027000  | 4.107878000  | 15.631305000 |
| C | -0.724027000 | 4.107878000  | 15.631305000 |
| C | -3.195513000 | 2.680965000  | 15.631305000 |
| C | -3.919540000 | 1.426913000  | 15.631305000 |
| C | -3.919540000 | -1.426913000 | 15.631305000 |
| C | -3.195513000 | -2.680965000 | 15.631305000 |
| C | -0.724027000 | -4.107878000 | 15.631305000 |
| C | 0.724027000  | -4.107878000 | 15.631305000 |
| C | 3.195513000  | -2.680965000 | 15.631305000 |
| C | 3.919540000  | -1.426913000 | 15.631305000 |
| C | 3.919540000  | 1.426913000  | 15.631305000 |
| C | 3.195513000  | 2.680965000  | 15.631305000 |
| C | -1.427664000 | 3.914984000  | 14.381519000 |
| C | -2.676644000 | 3.193885000  | 14.381519000 |
| C | -4.104308000 | 0.721099000  | 14.381519000 |
| C | -4.104308000 | -0.721099000 | 14.381519000 |
| C | -2.676644000 | -3.193885000 | 14.381519000 |
| C | -1.427664000 | -3.914984000 | 14.381519000 |
| C | 1.427664000  | -3.914984000 | 14.381519000 |
| C | 2.676644000  | -3.193885000 | 14.381519000 |
| C | 4.104308000  | -0.721099000 | 14.381519000 |
| C | 4.104308000  | 0.721099000  | 14.381519000 |
| C | 2.676644000  | 3.193885000  | 14.381519000 |
| C | 1.427664000  | 3.914984000  | 14.381519000 |
| C | -3.194181000 | 2.677447000  | 13.128161000 |
| C | -3.915828000 | 1.427518000  | 13.128161000 |
| C | -3.915828000 | -1.427518000 | 13.128161000 |

|   |              |              |              |
|---|--------------|--------------|--------------|
| C | -3.194181000 | -2.677447000 | 13.128161000 |
| C | -0.721647000 | -4.104965000 | 13.128161000 |
| C | 0.721647000  | -4.104965000 | 13.128161000 |
| C | 3.194181000  | -2.677447000 | 13.128161000 |
| C | 3.915828000  | -1.427518000 | 13.128161000 |
| C | 3.915828000  | 1.427518000  | 13.128161000 |
| C | 3.194181000  | 2.677447000  | 13.128161000 |
| C | 0.721647000  | 4.104965000  | 13.128161000 |
| C | -0.721647000 | 4.104965000  | 13.128161000 |
| C | -4.107959000 | 0.724098000  | 11.879344000 |
| C | -4.107959000 | -0.724098000 | 11.879344000 |
| C | -2.681067000 | -3.195547000 | 11.879344000 |
| C | -1.426892000 | -3.919646000 | 11.879344000 |
| C | 1.426892000  | -3.919646000 | 11.879344000 |
| C | 2.681067000  | -3.195547000 | 11.879344000 |
| C | 4.107959000  | -0.724098000 | 11.879344000 |
| C | 4.107959000  | 0.724098000  | 11.879344000 |
| C | 2.681067000  | 3.195547000  | 11.879344000 |
| C | 1.426892000  | 3.919646000  | 11.879344000 |
| C | -1.426892000 | 3.919646000  | 11.879344000 |
| C | -2.681067000 | 3.195547000  | 11.879344000 |
| C | -3.915771000 | -1.427532000 | 10.630442000 |
| C | -3.194165000 | -2.677391000 | 10.630442000 |
| C | -0.721606000 | -4.104924000 | 10.630442000 |
| C | 0.721606000  | -4.104924000 | 10.630442000 |
| C | 3.194165000  | -2.677391000 | 10.630442000 |
| C | 3.915771000  | -1.427532000 | 10.630442000 |
| C | 3.915771000  | 1.427532000  | 10.630442000 |
| C | 3.194165000  | 2.677391000  | 10.630442000 |
| C | 0.721606000  | 4.104924000  | 10.630442000 |
| C | -0.721606000 | 4.104924000  | 10.630442000 |
| C | -3.194165000 | 2.677391000  | 10.630442000 |
| C | -3.915771000 | 1.427532000  | 10.630442000 |
| C | -2.676750000 | -3.193927000 | 9.377124000  |
| C | -1.427647000 | -3.915097000 | 9.377124000  |
| C | 1.427647000  | -3.915097000 | 9.377124000  |
| C | 2.676750000  | -3.193927000 | 9.377124000  |
| C | 4.104397000  | -0.721170000 | 9.377124000  |
| C | 4.104397000  | 0.721170000  | 9.377124000  |
| C | 2.676750000  | 3.193927000  | 9.377124000  |
| C | 1.427647000  | 3.915097000  | 9.377124000  |
| C | -1.427647000 | 3.915097000  | 9.377124000  |
| C | -2.676750000 | 3.193927000  | 9.377124000  |
| C | -4.104397000 | 0.721170000  | 9.377124000  |
| C | -4.104397000 | -0.721170000 | 9.377124000  |
| C | -0.723983000 | -4.107821000 | 8.127406000  |
| C | 0.723983000  | -4.107821000 | 8.127406000  |
| C | 3.195486000  | -2.680898000 | 8.127406000  |
| C | 3.919469000  | -1.426923000 | 8.127406000  |
| C | 3.919469000  | 1.426923000  | 8.127406000  |
| C | 3.195486000  | 2.680898000  | 8.127406000  |
| C | 0.723983000  | 4.107821000  | 8.127406000  |
| C | -0.723983000 | 4.107821000  | 8.127406000  |
| C | -3.195486000 | 2.680898000  | 8.127406000  |
| C | -3.919469000 | 1.426923000  | 8.127406000  |
| C | -3.919469000 | -1.426923000 | 8.127406000  |
| C | -3.195486000 | -2.680898000 | 8.127406000  |
| C | 1.427386000  | -3.916652000 | 6.879198000  |
| C | 2.678227000  | -3.194478000 | 6.879198000  |
| C | 4.105613000  | -0.722173000 | 6.879198000  |
| C | 4.105613000  | 0.722173000  | 6.879198000  |
| C | 2.678227000  | 3.194478000  | 6.879198000  |
| C | 1.427386000  | 3.916652000  | 6.879198000  |
| C | -1.427386000 | 3.916652000  | 6.879198000  |
| C | -2.678227000 | 3.194478000  | 6.879198000  |
| C | -4.105613000 | 0.722173000  | 6.879198000  |
| C | -4.105613000 | -0.722173000 | 6.879198000  |
| C | -2.678227000 | -3.194478000 | 6.879198000  |
| C | -1.427386000 | -3.916652000 | 6.879198000  |
| C | 3.193748000  | -2.676251000 | 5.626217000  |

|   |              |              |              |
|---|--------------|--------------|--------------|
| C | 3.914576000  | -1.427741000 | 5.626217000  |
| C | 3.914576000  | 1.427741000  | 5.626217000  |
| C | 3.193748000  | 2.676251000  | 5.626217000  |
| C | 0.720827000  | 4.103993000  | 5.626217000  |
| C | -0.720827000 | 4.103993000  | 5.626217000  |
| C | -3.193748000 | 2.676251000  | 5.626217000  |
| C | -3.914576000 | 1.427741000  | 5.626217000  |
| C | -3.914576000 | -1.427741000 | 5.626217000  |
| C | -3.193748000 | -2.676251000 | 5.626217000  |
| C | -0.720827000 | -4.103993000 | 5.626217000  |
| C | 0.720827000  | -4.103993000 | 5.626217000  |
| C | 4.107476000  | -0.723698000 | 4.375545000  |
| C | 4.107476000  | 0.723698000  | 4.375545000  |
| C | 2.680478000  | 3.195329000  | 4.375545000  |
| C | 1.426997000  | 3.919027000  | 4.375545000  |
| C | -1.426997000 | 3.919027000  | 4.375545000  |
| C | -2.680478000 | 3.195329000  | 4.375545000  |
| C | -4.107476000 | 0.723698000  | 4.375545000  |
| C | -4.107476000 | -0.723698000 | 4.375545000  |
| C | -2.680478000 | -3.195329000 | 4.375545000  |
| C | -1.426997000 | -3.919027000 | 4.375545000  |
| C | 1.426997000  | -3.919027000 | 4.375545000  |
| C | 2.680478000  | -3.195329000 | 4.375545000  |
| C | 3.917535000  | 1.427235000  | 3.127779000  |
| C | 3.194789000  | 2.679068000  | 3.127779000  |
| C | 0.722746000  | 4.106303000  | 3.127779000  |
| C | -0.722746000 | 4.106303000  | 3.127779000  |
| C | -3.194789000 | 2.679068000  | 3.127779000  |
| C | -3.917535000 | 1.427235000  | 3.127779000  |
| C | -3.917535000 | -1.427235000 | 3.127779000  |
| C | -3.194789000 | -2.679068000 | 3.127779000  |
| C | -0.722746000 | -4.106303000 | 3.127779000  |
| C | 0.722746000  | -4.106303000 | 3.127779000  |
| C | 3.194789000  | -2.679068000 | 3.127779000  |
| C | 3.917535000  | -1.427235000 | 3.127779000  |
| C | 2.675991000  | 3.193651000  | 1.875393000  |
| C | 1.427787000  | 3.914302000  | 1.875393000  |
| C | -1.427787000 | 3.914302000  | 1.875393000  |
| C | -2.675991000 | 3.193651000  | 1.875393000  |
| C | -4.103779000 | 0.720651000  | 1.875393000  |
| C | -4.103779000 | -0.720651000 | 1.875393000  |
| C | -2.675991000 | -3.193651000 | 1.875393000  |
| C | -1.427787000 | -3.914302000 | 1.875393000  |
| C | 1.427787000  | -3.914302000 | 1.875393000  |
| C | 2.675991000  | -3.193651000 | 1.875393000  |
| C | 4.103779000  | -0.720651000 | 1.875393000  |
| C | 4.103779000  | 0.720651000  | 1.875393000  |
| C | 0.723273000  | 4.106969000  | 0.623805000  |
| C | -0.723273000 | 4.106969000  | 0.623805000  |
| C | -3.195103000 | 2.679857000  | 0.623805000  |
| C | -3.918375000 | 1.427112000  | 0.623805000  |
| C | -3.918375000 | -1.427112000 | 0.623805000  |
| C | -3.195103000 | -2.679857000 | 0.623805000  |
| C | -0.723273000 | -4.106969000 | 0.623805000  |
| C | 0.723273000  | -4.106969000 | 0.623805000  |
| C | 3.195103000  | -2.679857000 | 0.623805000  |
| C | 3.918375000  | -1.427112000 | 0.623805000  |
| C | 3.918375000  | 1.427112000  | 0.623805000  |
| C | 3.195103000  | 2.679857000  | 0.623805000  |
| C | -1.427112000 | 3.918375000  | -0.623805000 |
| C | -2.679857000 | 3.195103000  | -0.623805000 |
| C | -4.106969000 | 0.723273000  | -0.623805000 |
| C | -4.106969000 | -0.723273000 | -0.623805000 |
| C | -2.679857000 | -3.195103000 | -0.623805000 |
| C | -1.427112000 | -3.918375000 | -0.623805000 |
| C | 1.427112000  | -3.918375000 | -0.623805000 |
| C | 2.679857000  | -3.195103000 | -0.623805000 |
| C | 4.106969000  | -0.723273000 | -0.623805000 |
| C | 4.106969000  | 0.723273000  | -0.623805000 |
| C | 2.679857000  | 3.195103000  | -0.623805000 |



|   |              |              |              |
|---|--------------|--------------|--------------|
| C | 1.427112000  | 3.918375000  | -0.623805000 |
| C | -3.193651000 | 2.675991000  | -1.875393000 |
| C | -3.914302000 | 1.427787000  | -1.875393000 |
| C | -3.914302000 | -1.427787000 | -1.875393000 |
| C | -3.193651000 | -2.675991000 | -1.875393000 |
| C | -0.720651000 | -4.103779000 | -1.875393000 |
| C | 0.720651000  | -4.103779000 | -1.875393000 |
| C | 3.193651000  | -2.675991000 | -1.875393000 |
| C | 3.914302000  | -1.427787000 | -1.875393000 |
| C | 3.914302000  | 1.427787000  | -1.875393000 |
| C | 3.193651000  | 2.675991000  | -1.875393000 |
| C | 0.720651000  | 4.103779000  | -1.875393000 |
| C | -0.720651000 | 4.103779000  | -1.875393000 |
| C | -4.106303000 | 0.722746000  | -3.127779000 |
| C | -4.106303000 | -0.722746000 | -3.127779000 |
| C | -2.679068000 | -3.194789000 | -3.127779000 |
| C | -1.427235000 | -3.917535000 | -3.127779000 |
| C | 1.427235000  | -3.917535000 | -3.127779000 |
| C | 2.679068000  | -3.194789000 | -3.127779000 |
| C | 4.106303000  | -0.722746000 | -3.127779000 |
| C | 4.106303000  | 0.722746000  | -3.127779000 |
| C | 2.679068000  | 3.194789000  | -3.127779000 |
| C | 1.427235000  | 3.917535000  | -3.127779000 |
| C | -1.427235000 | 3.917535000  | -3.127779000 |
| C | -2.679068000 | 3.194789000  | -3.127779000 |
| C | -3.919027000 | -1.426997000 | -4.375545000 |
| C | -3.195329000 | -2.680478000 | -4.375545000 |
| C | -0.723698000 | -4.107476000 | -4.375545000 |
| C | 0.723698000  | -4.107476000 | -4.375545000 |
| C | 3.195329000  | -2.680478000 | -4.375545000 |
| C | 3.919027000  | -1.426997000 | -4.375545000 |
| C | 3.919027000  | 1.426997000  | -4.375545000 |
| C | 3.195329000  | 2.680478000  | -4.375545000 |
| C | 0.723698000  | 4.107476000  | -4.375545000 |
| C | -0.723698000 | 4.107476000  | -4.375545000 |
| C | -3.195329000 | 2.680478000  | -4.375545000 |
| C | -3.919027000 | 1.426997000  | -4.375545000 |
| C | -2.676251000 | -3.193748000 | -5.626217000 |
| C | -1.427741000 | -3.914576000 | -5.626217000 |
| C | 1.427741000  | -3.914576000 | -5.626217000 |
| C | 2.676251000  | -3.193748000 | -5.626217000 |
| C | 4.103993000  | -0.720827000 | -5.626217000 |
| C | 4.103993000  | 0.720827000  | -5.626217000 |
| C | 2.676251000  | 3.193748000  | -5.626217000 |
| C | 1.427741000  | 3.914576000  | -5.626217000 |
| C | -1.427741000 | 3.914576000  | -5.626217000 |
| C | -2.676251000 | 3.193748000  | -5.626217000 |
| C | -4.103993000 | 0.720827000  | -5.626217000 |
| C | -4.103993000 | -0.720827000 | -5.626217000 |
| C | -0.722173000 | -4.105613000 | -6.879198000 |
| C | 0.722173000  | -4.105613000 | -6.879198000 |
| C | 3.194478000  | -2.678227000 | -6.879198000 |
| C | 3.916652000  | -1.427386000 | -6.879198000 |
| C | 3.916652000  | 1.427386000  | -6.879198000 |
| C | 3.194478000  | 2.678227000  | -6.879198000 |
| C | 0.722173000  | 4.105613000  | -6.879198000 |
| C | -0.722173000 | 4.105613000  | -6.879198000 |
| C | -3.194478000 | 2.678227000  | -6.879198000 |
| C | -3.916652000 | 1.427386000  | -6.879198000 |
| C | -3.916652000 | -1.427386000 | -6.879198000 |
| C | -3.194478000 | -2.678227000 | -6.879198000 |
| C | 1.426923000  | -3.919469000 | -8.127406000 |
| C | 2.680898000  | -3.195486000 | -8.127406000 |
| C | 4.107821000  | -0.723983000 | -8.127406000 |
| C | 4.107821000  | 0.723983000  | -8.127406000 |
| C | 2.680898000  | 3.195486000  | -8.127406000 |
| C | 1.426923000  | 3.919469000  | -8.127406000 |
| C | -1.426923000 | 3.919469000  | -8.127406000 |
| C | -2.680898000 | 3.195486000  | -8.127406000 |
| C | -4.107821000 | 0.723983000  | -8.127406000 |

|   |              |              |               |
|---|--------------|--------------|---------------|
| C | -4.107821000 | -0.723983000 | -8.127406000  |
| C | -2.680898000 | -3.195486000 | -8.127406000  |
| C | -1.426923000 | -3.919469000 | -8.127406000  |
| C | 3.193927000  | -2.676750000 | -9.377124000  |
| C | 3.915097000  | -1.427647000 | -9.377124000  |
| C | 3.915097000  | 1.427647000  | -9.377124000  |
| C | 3.193927000  | 2.676750000  | -9.377124000  |
| C | 0.721170000  | 4.104397000  | -9.377124000  |
| C | -0.721170000 | 4.104397000  | -9.377124000  |
| C | -3.193927000 | 2.676750000  | -9.377124000  |
| C | -3.915097000 | 1.427647000  | -9.377124000  |
| C | -3.915097000 | -1.427647000 | -9.377124000  |
| C | -3.193927000 | -2.676750000 | -9.377124000  |
| C | -0.721170000 | -4.104397000 | -9.377124000  |
| C | 0.721170000  | -4.104397000 | -9.377124000  |
| C | 4.104924000  | -0.721606000 | -10.630442000 |
| C | 4.104924000  | 0.721606000  | -10.630442000 |
| C | 2.677391000  | 3.194165000  | -10.630442000 |
| C | 1.427532000  | 3.915771000  | -10.630442000 |
| C | -1.427532000 | 3.915771000  | -10.630442000 |
| C | -2.677391000 | 3.194165000  | -10.630442000 |
| C | -4.104924000 | 0.721606000  | -10.630442000 |
| C | -4.104924000 | -0.721606000 | -10.630442000 |
| C | -2.677391000 | -3.194165000 | -10.630442000 |
| C | -1.427532000 | -3.915771000 | -10.630442000 |
| C | 1.427532000  | -3.915771000 | -10.630442000 |
| C | 2.677391000  | -3.194165000 | -10.630442000 |
| C | 3.919646000  | 1.426892000  | -11.879344000 |
| C | 3.195547000  | 2.681067000  | -11.879344000 |
| C | 0.724098000  | 4.107959000  | -11.879344000 |
| C | -0.724098000 | 4.107959000  | -11.879344000 |
| C | -3.195547000 | 2.681067000  | -11.879344000 |
| C | -3.919646000 | 1.426892000  | -11.879344000 |
| C | -3.919646000 | -1.426892000 | -11.879344000 |
| C | -3.195547000 | -2.681067000 | -11.879344000 |
| C | -0.724098000 | -4.107959000 | -11.879344000 |
| C | 0.724098000  | -4.107959000 | -11.879344000 |
| C | 3.195547000  | -2.681067000 | -11.879344000 |
| C | 3.919646000  | -1.426892000 | -11.879344000 |
| C | 2.677447000  | 3.194181000  | -13.128161000 |
| C | 1.427518000  | 3.915828000  | -13.128161000 |
| C | -1.427518000 | 3.915828000  | -13.128161000 |
| C | -2.677447000 | 3.194181000  | -13.128161000 |
| C | -4.104965000 | 0.721647000  | -13.128161000 |
| C | -4.104965000 | -0.721647000 | -13.128161000 |
| C | -2.677447000 | -3.194181000 | -13.128161000 |
| C | -1.427518000 | -3.915828000 | -13.128161000 |
| C | 1.427518000  | -3.915828000 | -13.128161000 |
| C | 2.677447000  | -3.194181000 | -13.128161000 |
| C | 4.104965000  | -0.721647000 | -13.128161000 |
| C | 4.104965000  | 0.721647000  | -13.128161000 |
| C | 0.721099000  | 4.104308000  | -14.381519000 |
| C | -0.721099000 | 4.104308000  | -14.381519000 |
| C | -3.193885000 | 2.676644000  | -14.381519000 |
| C | -3.914984000 | 1.427664000  | -14.381519000 |
| C | -3.914984000 | -1.427664000 | -14.381519000 |
| C | -3.193885000 | -2.676644000 | -14.381519000 |
| C | -0.721099000 | -4.104308000 | -14.381519000 |
| C | 0.721099000  | -4.104308000 | -14.381519000 |
| C | 3.193885000  | -2.676644000 | -14.381519000 |
| C | 3.914984000  | -1.427664000 | -14.381519000 |
| C | 3.914984000  | 1.427664000  | -14.381519000 |
| C | 3.193885000  | 2.676644000  | -14.381519000 |
| C | -1.426913000 | 3.919540000  | -15.631305000 |
| C | -2.680965000 | 3.195513000  | -15.631305000 |
| C | -4.107878000 | 0.724027000  | -15.631305000 |
| C | -4.107878000 | -0.724027000 | -15.631305000 |
| C | -2.680965000 | -3.195513000 | -15.631305000 |
| C | -1.426913000 | -3.919540000 | -15.631305000 |
| C | 1.426913000  | -3.919540000 | -15.631305000 |

|   |              |              |               |
|---|--------------|--------------|---------------|
| C | 2.680965000  | -3.195513000 | -15.631305000 |
| C | 4.107878000  | -0.724027000 | -15.631305000 |
| C | 4.107878000  | 0.724027000  | -15.631305000 |
| C | 2.680965000  | 3.195513000  | -15.631305000 |
| C | 1.426913000  | 3.919540000  | -15.631305000 |
| C | -3.194489000 | 2.678287000  | -16.879360000 |
| C | -3.916709000 | 1.427365000  | -16.879360000 |
| C | -3.916709000 | -1.427365000 | -16.879360000 |
| C | -3.194489000 | -2.678287000 | -16.879360000 |
| C | -0.722220000 | -4.105652000 | -16.879360000 |
| C | 0.722220000  | -4.105652000 | -16.879360000 |
| C | 3.194489000  | -2.678287000 | -16.879360000 |
| C | 3.916709000  | -1.427365000 | -16.879360000 |
| C | 3.916709000  | 1.427365000  | -16.879360000 |
| C | 3.194489000  | 2.678287000  | -16.879360000 |
| C | 0.722220000  | 4.105652000  | -16.879360000 |
| C | -0.722220000 | 4.105652000  | -16.879360000 |
| C | -4.103827000 | 0.720703000  | -18.132447000 |
| C | -4.103827000 | -0.720703000 | -18.132447000 |
| C | -2.676060000 | -3.193667000 | -18.132447000 |
| C | -1.427767000 | -3.914369000 | -18.132447000 |
| C | 1.427767000  | -3.914369000 | -18.132447000 |
| C | 2.676060000  | -3.193667000 | -18.132447000 |
| C | 4.103827000  | -0.720703000 | -18.132447000 |
| C | 4.103827000  | 0.720703000  | -18.132447000 |
| C | 2.676060000  | 3.193667000  | -18.132447000 |
| C | 1.427767000  | 3.914369000  | -18.132447000 |
| C | -1.427767000 | 3.914369000  | -18.132447000 |
| C | -2.676060000 | 3.193667000  | -18.132447000 |
| C | -3.919155000 | -1.426984000 | -19.383234000 |
| C | -3.195382000 | -2.680595000 | -19.383234000 |
| C | -0.723773000 | -4.107580000 | -19.383234000 |
| C | 0.723773000  | -4.107580000 | -19.383234000 |
| C | 3.195382000  | -2.680595000 | -19.383234000 |
| C | 3.919155000  | -1.426984000 | -19.383234000 |
| C | 3.919155000  | 1.426984000  | -19.383234000 |
| C | 3.195382000  | 2.680595000  | -19.383234000 |
| C | 0.723773000  | 4.107580000  | -19.383234000 |
| C | -0.723773000 | 4.107580000  | -19.383234000 |
| C | -3.195382000 | 2.680595000  | -19.383234000 |
| C | -3.919155000 | 1.426984000  | -19.383234000 |
| C | -2.679199000 | -3.194829000 | -20.630741000 |
| C | -1.427204000 | -3.917669000 | -20.630741000 |
| C | 1.427204000  | -3.917669000 | -20.630741000 |
| C | 2.679199000  | -3.194829000 | -20.630741000 |
| C | 4.106403000  | -0.722840000 | -20.630741000 |
| C | 4.106403000  | 0.722840000  | -20.630741000 |
| C | 2.679199000  | 3.194829000  | -20.630741000 |
| C | 1.427204000  | 3.917669000  | -20.630741000 |
| C | -1.427204000 | 3.917669000  | -20.630741000 |
| C | -2.679199000 | 3.194829000  | -20.630741000 |
| C | -4.106403000 | 0.722840000  | -20.630741000 |
| C | -4.106403000 | -0.722840000 | -20.630741000 |
| C | -0.720452000 | -4.103523000 | -21.883260000 |
| C | 0.720452000  | -4.103523000 | -21.883260000 |
| C | 3.193529000  | -2.675692000 | -21.883260000 |
| C | 3.913981000  | -1.427831000 | -21.883260000 |
| C | 3.913981000  | 1.427831000  | -21.883260000 |
| C | 3.193529000  | 2.675692000  | -21.883260000 |
| C | 0.720452000  | 4.103523000  | -21.883260000 |
| C | -0.720452000 | 4.103523000  | -21.883260000 |
| C | -3.193529000 | 2.675692000  | -21.883260000 |
| C | -3.913981000 | 1.427831000  | -21.883260000 |
| C | -3.913981000 | -1.427831000 | -21.883260000 |
| C | -3.193529000 | -2.675692000 | -21.883260000 |
| C | 1.427104000  | -3.918506000 | -23.135081000 |
| C | 2.679974000  | -3.195161000 | -23.135081000 |
| C | 4.107077000  | -0.723345000 | -23.135081000 |
| C | 4.107077000  | 0.723345000  | -23.135081000 |
| C | 2.679974000  | 3.195161000  | -23.135081000 |

|   |              |              |               |
|---|--------------|--------------|---------------|
| C | 1.427104000  | 3.918506000  | -23.135081000 |
| C | -1.427104000 | 3.918506000  | -23.135081000 |
| C | -2.679974000 | 3.195161000  | -23.135081000 |
| C | -4.107077000 | 0.723345000  | -23.135081000 |
| C | -4.107077000 | -0.723345000 | -23.135081000 |
| C | -2.679974000 | -3.195161000 | -23.135081000 |
| C | -1.427104000 | -3.918506000 | -23.135081000 |
| C | 3.195169000  | -2.680106000 | -24.382314000 |
| C | 3.918624000  | -1.427045000 | -24.382314000 |
| C | 3.918624000  | 1.427045000  | -24.382314000 |
| C | 3.195169000  | 2.680106000  | -24.382314000 |
| C | 0.723455000  | 4.107150000  | -24.382314000 |
| C | -0.723455000 | 4.107150000  | -24.382314000 |
| C | -3.195169000 | 2.680106000  | -24.382314000 |
| C | -3.918624000 | 1.427045000  | -24.382314000 |
| C | -3.918624000 | -1.427045000 | -24.382314000 |
| C | -3.195169000 | -2.680106000 | -24.382314000 |
| C | -0.723455000 | -4.107150000 | -24.382314000 |
| C | 0.723455000  | -4.107150000 | -24.382314000 |
| C | 4.103425000  | -0.720380000 | -25.633997000 |
| C | 4.103425000  | 0.720380000  | -25.633997000 |
| C | 2.675580000  | 3.193480000  | -25.633997000 |
| C | 1.427845000  | 3.913860000  | -25.633997000 |
| C | -1.427845000 | 3.913860000  | -25.633997000 |
| C | -2.675580000 | 3.193480000  | -25.633997000 |
| C | -4.103425000 | 0.720380000  | -25.633997000 |
| C | -4.103425000 | -0.720380000 | -25.633997000 |
| C | -2.675580000 | -3.193480000 | -25.633997000 |
| C | -1.427845000 | -3.913860000 | -25.633997000 |
| C | 1.427845000  | -3.913860000 | -25.633997000 |
| C | 2.675580000  | -3.193480000 | -25.633997000 |
| C | 3.917627000  | 1.427259000  | -26.886804000 |
| C | 3.194856000  | 2.679134000  | -26.886804000 |
| C | 0.722770000  | 4.106394000  | -26.886804000 |
| C | -0.722770000 | 4.106394000  | -26.886804000 |
| C | -3.194856000 | 2.679134000  | -26.886804000 |
| C | -3.917627000 | 1.427259000  | -26.886804000 |
| C | -3.917627000 | -1.427259000 | -26.886804000 |
| C | -3.194856000 | -2.679134000 | -26.886804000 |
| C | -0.722770000 | -4.106394000 | -26.886804000 |
| C | 0.722770000  | -4.106394000 | -26.886804000 |
| C | 3.194856000  | -2.679134000 | -26.886804000 |
| C | 3.917627000  | -1.427259000 | -26.886804000 |
| C | 2.680936000  | 3.195479000  | -28.134085000 |
| C | 1.426898000  | 3.919498000  | -28.134085000 |
| C | -1.426898000 | 3.919498000  | -28.134085000 |
| C | -2.680936000 | 3.195479000  | -28.134085000 |
| C | -4.107834000 | 0.724019000  | -28.134085000 |
| C | -4.107834000 | -0.724019000 | -28.134085000 |
| C | -2.680936000 | -3.195479000 | -28.134085000 |
| C | -1.426898000 | -3.919498000 | -28.134085000 |
| C | 1.426898000  | -3.919498000 | -28.134085000 |
| C | 2.680936000  | -3.195479000 | -28.134085000 |
| C | 4.107834000  | -0.724019000 | -28.134085000 |
| C | 4.107834000  | 0.724019000  | -28.134085000 |
| C | 0.720501000  | 4.103551000  | -29.384711000 |
| C | -0.720501000 | 4.103551000  | -29.384711000 |
| C | -3.193529000 | 2.675747000  | -29.384711000 |
| C | -3.914029000 | 1.427803000  | -29.384711000 |
| C | -3.914029000 | -1.427803000 | -29.384711000 |
| C | -3.193529000 | -2.675747000 | -29.384711000 |
| C | -0.720501000 | -4.103551000 | -29.384711000 |
| C | 0.720501000  | -4.103551000 | -29.384711000 |
| C | 3.193529000  | -2.675747000 | -29.384711000 |
| C | 3.914029000  | -1.427803000 | -29.384711000 |
| C | 3.914029000  | 1.427803000  | -29.384711000 |
| C | 3.193529000  | 2.675747000  | -29.384711000 |
| C | -1.427444000 | 3.916555000  | -30.638382000 |
| C | -2.678114000 | 3.194480000  | -30.638382000 |
| C | -4.105558000 | 0.722075000  | -30.638382000 |

|   |              |              |               |
|---|--------------|--------------|---------------|
| C | -4.105558000 | -0.722075000 | -30.638382000 |
| C | -2.678114000 | -3.194480000 | -30.638382000 |
| C | -1.427444000 | -3.916555000 | -30.638382000 |
| C | 1.427444000  | -3.916555000 | -30.638382000 |
| C | 2.678114000  | -3.194480000 | -30.638382000 |
| C | 4.105558000  | -0.722075000 | -30.638382000 |
| C | 4.105558000  | 0.722075000  | -30.638382000 |
| C | 2.678114000  | 3.194480000  | -30.638382000 |
| C | 1.427444000  | 3.916555000  | -30.638382000 |
| C | -3.195738000 | 2.681627000  | -31.886062000 |
| C | -3.920227000 | 1.426777000  | -31.886062000 |
| C | -3.920227000 | -1.426777000 | -31.886062000 |
| C | -3.195738000 | -2.681627000 | -31.886062000 |
| C | -0.724488000 | -4.108404000 | -31.886062000 |
| C | 0.724488000  | -4.108404000 | -31.886062000 |
| C | 3.195738000  | -2.681627000 | -31.886062000 |
| C | 3.920227000  | -1.426777000 | -31.886062000 |
| C | 3.920227000  | 1.426777000  | -31.886062000 |
| C | 3.195738000  | 2.681627000  | -31.886062000 |
| C | 0.724488000  | 4.108404000  | -31.886062000 |
| C | -0.724488000 | 4.108404000  | -31.886062000 |
| C | -4.103911000 | 0.720831000  | -33.135448000 |
| C | -4.103911000 | -0.720831000 | -33.135448000 |
| C | -2.676213000 | -3.193675000 | -33.135448000 |
| C | -1.427697000 | -3.914506000 | -33.135448000 |
| C | 1.427697000  | -3.914506000 | -33.135448000 |
| C | 2.676213000  | -3.193675000 | -33.135448000 |
| C | 4.103911000  | -0.720831000 | -33.135448000 |
| C | 4.103911000  | 0.720831000  | -33.135448000 |
| C | 2.676213000  | 3.193675000  | -33.135448000 |
| C | 1.427697000  | 3.914506000  | -33.135448000 |
| C | -1.427697000 | 3.914506000  | -33.135448000 |
| C | -2.676213000 | 3.193675000  | -33.135448000 |
| C | -3.915305000 | -1.427651000 | -34.389793000 |
| C | -3.194035000 | -2.676928000 | -34.389793000 |
| C | -0.721271000 | -4.104579000 | -34.389793000 |
| C | 0.721271000  | -4.104579000 | -34.389793000 |
| C | 3.194035000  | -2.676928000 | -34.389793000 |
| C | 3.915305000  | -1.427651000 | -34.389793000 |
| C | 3.915305000  | 1.427651000  | -34.389793000 |
| C | 3.194035000  | 2.676928000  | -34.389793000 |
| C | 0.721271000  | 4.104579000  | -34.389793000 |
| C | -0.721271000 | 4.104579000  | -34.389793000 |
| C | -3.194035000 | 2.676928000  | -34.389793000 |
| C | -3.915305000 | 1.427651000  | -34.389793000 |
| C | -2.682115000 | -3.195900000 | -35.638266000 |
| C | -1.426673000 | -3.920729000 | -35.638266000 |
| C | 1.426673000  | -3.920729000 | -35.638266000 |
| C | 2.682115000  | -3.195900000 | -35.638266000 |
| C | 4.108788000  | -0.724830000 | -35.638266000 |
| C | 4.108788000  | 0.724830000  | -35.638266000 |
| C | 2.682115000  | 3.195900000  | -35.638266000 |
| C | 1.426673000  | 3.920729000  | -35.638266000 |
| C | -1.426673000 | 3.920729000  | -35.638266000 |
| C | -2.682115000 | 3.195900000  | -35.638266000 |
| C | -4.108788000 | 0.724830000  | -35.638266000 |
| C | -4.108788000 | -0.724830000 | -35.638266000 |
| C | -0.721396000 | -4.104494000 | -36.886251000 |
| C | 0.721396000  | -4.104494000 | -36.886251000 |
| C | 3.193898000  | -2.676994000 | -36.886251000 |
| C | 3.915294000  | -1.427500000 | -36.886251000 |
| C | 3.915294000  | 1.427500000  | -36.886251000 |
| C | 3.193898000  | 2.676994000  | -36.886251000 |
| C | 0.721396000  | 4.104494000  | -36.886251000 |
| C | -0.721396000 | 4.104494000  | -36.886251000 |
| C | -3.193898000 | 2.676994000  | -36.886251000 |
| C | -3.915294000 | 1.427500000  | -36.886251000 |
| C | -3.915294000 | -1.427500000 | -36.886251000 |
| C | -3.193898000 | -2.676994000 | -36.886251000 |
| C | 1.427896000  | -3.913881000 | -38.141020000 |

|   |              |              |               |
|---|--------------|--------------|---------------|
| C | 2.675573000  | -3.193535000 | -38.141020000 |
| C | 4.103469000  | -0.720347000 | -38.141020000 |
| C | 4.103469000  | 0.720347000  | -38.141020000 |
| C | 2.675573000  | 3.193535000  | -38.141020000 |
| C | 1.427896000  | 3.913881000  | -38.141020000 |
| C | -1.427896000 | 3.913881000  | -38.141020000 |
| C | -2.675573000 | 3.193535000  | -38.141020000 |
| C | -4.103469000 | 0.720347000  | -38.141020000 |
| C | -4.103469000 | -0.720347000 | -38.141020000 |
| C | -2.675573000 | -3.193535000 | -38.141020000 |
| C | -1.427896000 | -3.913881000 | -38.141020000 |
| C | 3.196179000  | -2.682574000 | -39.390811000 |
| C | 3.921266000  | -1.426685000 | -39.390811000 |
| C | 3.921266000  | 1.426685000  | -39.390811000 |
| C | 3.196179000  | 2.682574000  | -39.390811000 |
| C | 0.725088000  | 4.109259000  | -39.390811000 |
| C | -0.725088000 | 4.109259000  | -39.390811000 |
| C | -3.196179000 | 2.682574000  | -39.390811000 |
| C | -3.921266000 | 1.426685000  | -39.390811000 |
| C | -3.921266000 | -1.426685000 | -39.390811000 |
| C | -3.196179000 | -2.682574000 | -39.390811000 |
| C | -0.725088000 | -4.109259000 | -39.390811000 |
| C | 0.725088000  | -4.109259000 | -39.390811000 |
| C | 4.106116000  | -0.722386000 | -40.637107000 |
| C | 4.106116000  | 0.722386000  | -40.637107000 |
| C | 2.678663000  | 3.194808000  | -40.637107000 |
| C | 1.427453000  | 3.917194000  | -40.637107000 |
| C | -1.427453000 | 3.917194000  | -40.637107000 |
| C | -2.678663000 | 3.194808000  | -40.637107000 |
| C | -4.106116000 | 0.722386000  | -40.637107000 |
| C | -4.106116000 | -0.722386000 | -40.637107000 |
| C | -2.678663000 | -3.194808000 | -40.637107000 |
| C | -1.427453000 | -3.917194000 | -40.637107000 |
| C | 1.427453000  | -3.917194000 | -40.637107000 |
| C | 2.678663000  | -3.194808000 | -40.637107000 |
| C | 3.912579000  | 1.428551000  | -41.891834000 |
| C | 3.193451000  | 2.674118000  | -41.891834000 |
| C | 0.719128000  | 4.102668000  | -41.891834000 |
| C | -0.719128000 | 4.102668000  | -41.891834000 |
| C | -3.193451000 | 2.674118000  | -41.891834000 |
| C | -3.912579000 | 1.428551000  | -41.891834000 |
| C | -3.912579000 | -1.428551000 | -41.891834000 |
| C | -3.193451000 | -2.674118000 | -41.891834000 |
| C | -0.719128000 | -4.102668000 | -41.891834000 |
| C | 0.719128000  | -4.102668000 | -41.891834000 |
| C | 3.193451000  | -2.674118000 | -41.891834000 |
| C | 3.912579000  | -1.428551000 | -41.891834000 |
| C | 2.682000000  | 3.195395000  | -43.143877000 |
| C | 1.426293000  | 3.920378000  | -43.143877000 |
| C | -1.426293000 | 3.920378000  | -43.143877000 |
| C | -2.682000000 | 3.195395000  | -43.143877000 |
| C | -4.108294000 | 0.724983000  | -43.143877000 |
| C | -4.108294000 | -0.724983000 | -43.143877000 |
| C | -2.682000000 | -3.195395000 | -43.143877000 |
| C | -1.426293000 | -3.920378000 | -43.143877000 |
| C | 1.426293000  | -3.920378000 | -43.143877000 |
| C | 2.682000000  | -3.195395000 | -43.143877000 |
| C | 4.108294000  | -0.724983000 | -43.143877000 |
| C | 4.108294000  | 0.724983000  | -43.143877000 |
| C | 0.723197000  | 4.102089000  | -44.387711000 |
| C | -0.723197000 | 4.102089000  | -44.387711000 |
| C | -3.190914000 | 2.677351000  | -44.387711000 |
| C | -3.914111000 | 1.424737000  | -44.387711000 |
| C | -3.914111000 | -1.424737000 | -44.387711000 |
| C | -3.190914000 | -2.677351000 | -44.387711000 |
| C | -0.723197000 | -4.102089000 | -44.387711000 |
| C | 0.723197000  | -4.102089000 | -44.387711000 |
| C | 3.190914000  | -2.677351000 | -44.387711000 |
| C | 3.914111000  | -1.424737000 | -44.387711000 |
| C | 3.914111000  | 1.424737000  | -44.387711000 |

|   |              |              |               |
|---|--------------|--------------|---------------|
| C | 3.190914000  | 2.677351000  | -44.387711000 |
| C | -1.424114000 | 3.896658000  | -45.642118000 |
| C | -2.662548000 | 3.181648000  | -45.642118000 |
| C | -4.086662000 | 0.715010000  | -45.642118000 |
| C | -4.086662000 | -0.715010000 | -45.642118000 |
| C | -2.662548000 | -3.181648000 | -45.642118000 |
| C | -1.424114000 | -3.896658000 | -45.642118000 |
| C | 1.424114000  | -3.896658000 | -45.642118000 |
| C | 2.662548000  | -3.181648000 | -45.642118000 |
| C | 4.086662000  | -0.715010000 | -45.642118000 |
| C | 4.086662000  | 0.715010000  | -45.642118000 |
| C | 2.662548000  | 3.181648000  | -45.642118000 |
| C | 1.424114000  | 3.896658000  | -45.642118000 |
| C | -3.185812000 | 2.677782000  | -46.902940000 |
| C | -3.911933000 | 1.420103000  | -46.902940000 |
| C | -3.911933000 | -1.420103000 | -46.902940000 |
| C | -3.185812000 | -2.677782000 | -46.902940000 |
| C | -0.726121000 | -4.097885000 | -46.902940000 |
| C | 0.726121000  | -4.097885000 | -46.902940000 |
| C | 3.185812000  | -2.677782000 | -46.902940000 |
| C | 3.911933000  | -1.420103000 | -46.902940000 |
| C | 3.911933000  | 1.420103000  | -46.902940000 |
| C | 3.185812000  | 2.677782000  | -46.902940000 |
| C | 0.726121000  | 4.097885000  | -46.902940000 |
| C | -0.726121000 | 4.097885000  | -46.902940000 |
| C | -4.146288000 | 0.734246000  | -48.143309000 |
| C | -4.146288000 | -0.734246000 | -48.143309000 |
| C | -2.709020000 | -3.223667000 | -48.143309000 |
| C | -1.437268000 | -3.957913000 | -48.143309000 |
| C | 1.437268000  | -3.957913000 | -48.143309000 |
| C | 2.709020000  | -3.223667000 | -48.143309000 |
| C | 4.146288000  | -0.734246000 | -48.143309000 |
| C | 4.146288000  | 0.734246000  | -48.143309000 |
| C | 2.709020000  | 3.223667000  | -48.143309000 |
| C | 1.437268000  | 3.957913000  | -48.143309000 |
| C | -1.437268000 | 3.957913000  | -48.143309000 |
| C | -2.709020000 | 3.223667000  | -48.143309000 |
| C | -3.993237000 | -1.506870000 | -49.359524000 |
| C | -3.301606000 | -2.704809000 | -49.359524000 |
| C | -0.691631000 | -4.211679000 | -49.359524000 |
| C | 0.691631000  | -4.211679000 | -49.359524000 |
| C | 3.301606000  | -2.704809000 | -49.359524000 |
| C | 3.993237000  | -1.506870000 | -49.359524000 |
| C | 3.993237000  | 1.506870000  | -49.359524000 |
| C | 3.301606000  | 2.704809000  | -49.359524000 |
| C | 0.691631000  | 4.211679000  | -49.359524000 |
| C | -0.691631000 | 4.211679000  | -49.359524000 |
| C | -3.301606000 | 2.704809000  | -49.359524000 |
| C | -3.993237000 | 1.506870000  | -49.359524000 |
| H | 4.276875000  | -1.227005000 | 50.315479000  |
| H | 4.276875000  | 1.227005000  | 50.315479000  |
| H | 3.201055000  | 3.090380000  | 50.315479000  |
| H | 1.075820000  | 4.317385000  | 50.315479000  |
| H | -1.075820000 | 4.317385000  | 50.315479000  |
| H | -3.201055000 | 3.090380000  | 50.315479000  |
| H | -4.276875000 | 1.227005000  | 50.315479000  |
| H | -4.276875000 | -1.227005000 | 50.315479000  |
| H | -3.201055000 | -3.090380000 | 50.315479000  |
| H | -1.075820000 | -4.317385000 | 50.315479000  |
| H | 1.075820000  | -4.317385000 | 50.315479000  |
| H | 3.201055000  | -3.090380000 | 50.315479000  |
| H | -4.317385000 | -1.075820000 | -50.315479000 |
| H | -3.090380000 | -3.201055000 | -50.315479000 |
| H | -1.227005000 | -4.276875000 | -50.315479000 |
| H | 1.227005000  | -4.276875000 | -50.315479000 |
| H | 3.090380000  | -3.201055000 | -50.315479000 |
| H | 4.317385000  | -1.075820000 | -50.315479000 |
| H | 4.317385000  | 1.075820000  | -50.315479000 |
| H | 3.090380000  | 3.201055000  | -50.315479000 |
| H | 1.227005000  | 4.276875000  | -50.315479000 |

|   |              |             |               |
|---|--------------|-------------|---------------|
| H | -1.227005000 | 4.276875000 | -50.315479000 |
| H | -3.090380000 | 3.201055000 | -50.315479000 |
| H | -4.317385000 | 1.075820000 | -50.315479000 |

Nanotube (6,6) u40v6\_  
B3LYP/STO-3G Energy: -36607.845686

|   |             |             |             |
|---|-------------|-------------|-------------|
| C | 2.39246735  | 3.41233150  | 0.00000000  |
| C | -4.15139944 | 0.36577175  | 0.00000000  |
| C | 1.75893209  | -3.77810326 | 0.00000000  |
| C | -2.39246735 | -3.41233150 | 0.00000000  |
| C | 4.15139944  | -0.36577175 | 0.00000000  |
| C | -1.75893209 | 3.77810326  | 0.00000000  |
| C | 3.41233150  | 2.39246735  | 0.00000000  |
| C | 0.36577175  | -4.15139944 | 0.00000000  |
| C | -3.77810326 | 1.75893209  | 0.00000000  |
| C | -3.41233150 | -2.39246735 | 0.00000000  |
| C | -0.36577175 | 4.15139944  | 0.00000000  |
| C | 3.77810326  | -1.75893209 | 0.00000000  |
| C | 3.78098224  | 1.76229755  | 1.25094951  |
| C | -3.41668557 | 2.39327790  | 1.25094951  |
| C | -0.36429667 | -4.15557545 | 1.25094951  |
| C | -3.78098224 | -1.76229755 | 1.25094951  |
| C | 3.41668557  | -2.39327790 | 1.25094951  |
| C | 0.36429667  | 4.15557545  | 1.25094951  |
| C | 1.76229755  | 3.78098224  | -1.25094951 |
| C | 2.39327790  | -3.41668557 | -1.25094951 |
| C | -4.15557545 | -0.36429667 | -1.25094951 |
| C | -1.76229755 | -3.78098224 | -1.25094951 |
| C | -2.39327790 | 3.41668557  | -1.25094951 |
| C | 4.15557545  | 0.36429667  | -1.25094951 |
| C | -3.78098224 | -1.76229755 | -1.25094951 |
| C | 3.41668557  | -2.39327790 | -1.25094951 |
| C | 0.36429667  | 4.15557545  | -1.25094951 |
| C | 3.78098224  | 1.76229755  | -1.25094951 |
| C | -3.41668557 | 2.39327790  | -1.25094951 |
| C | -0.36429667 | -4.15557545 | -1.25094951 |
| C | -1.76229755 | -3.78098224 | 1.25094951  |
| C | -2.39327790 | 3.41668557  | 1.25094951  |
| C | 4.15557545  | 0.36429667  | 1.25094951  |
| C | 1.76229755  | 3.78098224  | 1.25094951  |
| C | 2.39327790  | -3.41668557 | 1.25094951  |
| C | -4.15557545 | -0.36429667 | 1.25094951  |
| C | 4.15617536  | -0.36429187 | 2.49743789  |
| C | -1.76260167 | 3.78149938  | 2.49743789  |
| C | -2.39357369 | -3.41720751 | 2.49743789  |
| C | -4.15617536 | 0.36429187  | 2.49743789  |
| C | 1.76260167  | -3.78149938 | 2.49743789  |
| C | 2.39357369  | 3.41720751  | 2.49743789  |
| C | -0.36429187 | 4.15617536  | -2.49743789 |
| C | 3.78149938  | -1.76260167 | -2.49743789 |
| C | -3.41720751 | -2.39357369 | -2.49743789 |
| C | 0.36429187  | -4.15617536 | -2.49743789 |
| C | -3.78149938 | 1.76260167  | -2.49743789 |
| C | 3.41720751  | 2.39357369  | -2.49743789 |
| C | -4.15617536 | 0.36429187  | -2.49743789 |
| C | 1.76260167  | -3.78149938 | -2.49743789 |
| C | 2.39357369  | 3.41720751  | -2.49743789 |
| C | 4.15617536  | -0.36429187 | -2.49743789 |
| C | -1.76260167 | 3.78149938  | -2.49743789 |
| C | -2.39357369 | -3.41720751 | -2.49743789 |
| C | 0.36429187  | -4.15617536 | 2.49743789  |
| C | -3.78149938 | 1.76260167  | 2.49743789  |
| C | 3.41720751  | 2.39357369  | 2.49743789  |
| C | -0.36429187 | 4.15617536  | 2.49743789  |
| C | 3.78149938  | -1.76260167 | 2.49743789  |
| C | -3.41720751 | -2.39357369 | 2.49743789  |
| C | 3.41317321  | -2.39313137 | 3.74816605  |



|   |             |             |             |
|---|-------------|-------------|-------------|
| C | 0.36592596  | 4.15246039  | 3.74816605  |
| C | -3.77909916 | -1.75932902 | 3.74816605  |
| C | -3.41317321 | 2.39313137  | 3.74816605  |
| C | -0.36592596 | -4.15246039 | 3.74816605  |
| C | 3.77909916  | 1.75932902  | 3.74816605  |
| C | -2.39313137 | 3.41317321  | -3.74816605 |
| C | 4.15246039  | 0.36592596  | -3.74816605 |
| C | -1.75932902 | -3.77909916 | -3.74816605 |
| C | 2.39313137  | -3.41317321 | -3.74816605 |
| C | -4.15246039 | -0.36592596 | -3.74816605 |
| C | 1.75932902  | 3.77909916  | -3.74816605 |
| C | -3.41317321 | 2.39313137  | -3.74816605 |
| C | -0.36592596 | -4.15246039 | -3.74816605 |
| C | 3.77909916  | 1.75932902  | -3.74816605 |
| C | 3.41317321  | -2.39313137 | -3.74816605 |
| C | 0.36592596  | 4.15246039  | -3.74816605 |
| C | -3.77909916 | -1.75932902 | -3.74816605 |
| C | 2.39313137  | -3.41317321 | 3.74816605  |
| C | -4.15246039 | -0.36592596 | 3.74816605  |
| C | 1.75932902  | 3.77909916  | 3.74816605  |
| C | -2.39313137 | 3.41317321  | 3.74816605  |
| C | 4.15246039  | 0.36592596  | 3.74816605  |
| C | -1.75932902 | -3.77909916 | 3.74816605  |
| C | 1.76202821  | -3.78099565 | 4.99948627  |
| C | 2.39342418  | 3.41645901  | 4.99948627  |
| C | -4.15545238 | 0.36453664  | 4.99948627  |
| C | -1.76202821 | 3.78099565  | 4.99948627  |
| C | -2.39342418 | -3.41645901 | 4.99948627  |
| C | 4.15545238  | -0.36453664 | 4.99948627  |
| C | -3.78099565 | 1.76202821  | -4.99948627 |
| C | 3.41645901  | 2.39342418  | -4.99948627 |
| C | 0.36453664  | -4.15545238 | -4.99948627 |
| C | 3.78099565  | -1.76202821 | -4.99948627 |
| C | -3.41645901 | -2.39342418 | -4.99948627 |
| C | -0.36453664 | 4.15545238  | -4.99948627 |
| C | -1.76202821 | 3.78099565  | -4.99948627 |
| C | -2.39342418 | -3.41645901 | -4.99948627 |
| C | 4.15545238  | -0.36453664 | -4.99948627 |
| C | 1.76202821  | -3.78099565 | -4.99948627 |
| C | 2.39342418  | 3.41645901  | -4.99948627 |
| C | -4.15545238 | 0.36453664  | -4.99948627 |
| C | 3.78099565  | -1.76202821 | 4.99948627  |
| C | -3.41645901 | -2.39342418 | 4.99948627  |
| C | -0.36453664 | 4.15545238  | 4.99948627  |
| C | -3.78099565 | 1.76202821  | 4.99948627  |
| C | 3.41645901  | 2.39342418  | 4.99948627  |
| C | 0.36453664  | -4.15545238 | 4.99948627  |
| C | -0.36409639 | -4.15653455 | 6.24605857  |
| C | 3.78171271  | 1.76295055  | 6.24605857  |
| C | -3.41761632 | 2.39358400  | 6.24605857  |
| C | 0.36409639  | 4.15653455  | 6.24605857  |
| C | -3.78171271 | -1.76295055 | 6.24605857  |
| C | 3.41761632  | -2.39358400 | 6.24605857  |
| C | -4.15653455 | -0.36409639 | -6.24605857 |
| C | 1.76295055  | 3.78171271  | -6.24605857 |
| C | 2.39358400  | -3.41761632 | -6.24605857 |
| C | 4.15653455  | 0.36409639  | -6.24605857 |
| C | -1.76295055 | -3.78171271 | -6.24605857 |
| C | -2.39358400 | 3.41761632  | -6.24605857 |
| C | 0.36409639  | 4.15653455  | -6.24605857 |
| C | -3.78171271 | -1.76295055 | -6.24605857 |
| C | 3.41761632  | -2.39358400 | -6.24605857 |
| C | -0.36409639 | -4.15653455 | -6.24605857 |
| C | 3.78171271  | 1.76295055  | -6.24605857 |
| C | -3.41761632 | 2.39358400  | -6.24605857 |
| C | 4.15653455  | 0.36409639  | 6.24605857  |
| C | -1.76295055 | -3.78171271 | 6.24605857  |
| C | -2.39358400 | 3.41761632  | 6.24605857  |
| C | -4.15653455 | -0.36409639 | 6.24605857  |
| C | 1.76295055  | 3.78171271  | 6.24605857  |

|   |             |             |             |
|---|-------------|-------------|-------------|
| C | 2.39358400  | -3.41761632 | 6.24605857  |
| C | -2.39318065 | -3.41328975 | 7.49588603  |
| C | 4.15258596  | -0.36591036 | 7.49588603  |
| C | -1.75940531 | 3.77920011  | 7.49588603  |
| C | 2.39318065  | 3.41328975  | 7.49588603  |
| C | -4.15258596 | 0.36591036  | 7.49588603  |
| C | 1.75940531  | -3.77920011 | 7.49588603  |
| C | -3.41328975 | -2.39318065 | -7.49588603 |
| C | -0.36591036 | 4.15258596  | -7.49588603 |
| C | 3.77920011  | -1.75940531 | -7.49588603 |
| C | 3.41328975  | 2.39318065  | -7.49588603 |
| C | 0.36591036  | -4.15258596 | -7.49588603 |
| C | -3.77920011 | 1.75940531  | -7.49588603 |
| C | 2.39318065  | 3.41328975  | -7.49588603 |
| C | -4.15258596 | 0.36591036  | -7.49588603 |
| C | 1.75940531  | -3.77920011 | -7.49588603 |
| C | -2.39318065 | -3.41328975 | -7.49588603 |
| C | 4.15258596  | -0.36591036 | -7.49588603 |
| C | -1.75940531 | 3.77920011  | -7.49588603 |
| C | 3.41328975  | 2.39318065  | 7.49588603  |
| C | 0.36591036  | -4.15258596 | 7.49588603  |
| C | -3.77920011 | 1.75940531  | 7.49588603  |
| C | -3.41328975 | -2.39318065 | 7.49588603  |
| C | -0.36591036 | 4.15258596  | 7.49588603  |
| C | 3.77920011  | -1.75940531 | 7.49588603  |
| C | -3.78077385 | -1.76160865 | 8.74720286  |
| C | 3.41598476  | -2.39344188 | 8.74720286  |
| C | 0.36478909  | 4.15505052  | 8.74720286  |
| C | 3.78077385  | 1.76160865  | 8.74720286  |
| C | -3.41598476 | 2.39344188  | 8.74720286  |
| C | -0.36478909 | -4.15505052 | 8.74720286  |
| C | -1.76160865 | -3.78077385 | -8.74720286 |
| C | -2.39344188 | 3.41598476  | -8.74720286 |
| C | 4.15505052  | 0.36478909  | -8.74720286 |
| C | 1.76160865  | 3.78077385  | -8.74720286 |
| C | 2.39344188  | -3.41598476 | -8.74720286 |
| C | -4.15505052 | -0.36478909 | -8.74720286 |
| C | 3.78077385  | 1.76160865  | -8.74720286 |
| C | -3.41598476 | 2.39344188  | -8.74720286 |
| C | -0.36478909 | -4.15505052 | -8.74720286 |
| C | -3.78077385 | -1.76160865 | -8.74720286 |
| C | 3.41598476  | -2.39344188 | -8.74720286 |
| C | 0.36478909  | 4.15505052  | -8.74720286 |
| C | 1.76160865  | 3.78077385  | 8.74720286  |
| C | 2.39344188  | -3.41598476 | 8.74720286  |
| C | -4.15505052 | -0.36478909 | 8.74720286  |
| C | -1.76160865 | -3.78077385 | 8.74720286  |
| C | -2.39344188 | 3.41598476  | 8.74720286  |
| C | 4.15505052  | 0.36478909  | 8.74720286  |
| C | -4.15685178 | 0.36396410  | 9.99369949  |
| C | 1.76322374  | -3.78192129 | 9.99369949  |
| C | 2.39362804  | 3.41795719  | 9.99369949  |
| C | 4.15685178  | -0.36396410 | 9.99369949  |
| C | -1.76322374 | 3.78192129  | 9.99369949  |
| C | -2.39362804 | -3.41795719 | 9.99369949  |
| C | 0.36396410  | -4.15685178 | -9.99369949 |
| C | -3.78192129 | 1.76322374  | -9.99369949 |
| C | 3.41795719  | 2.39362804  | -9.99369949 |
| C | -0.36396410 | 4.15685178  | -9.99369949 |
| C | 3.78192129  | -1.76322374 | -9.99369949 |
| C | -3.41795719 | -2.39362804 | -9.99369949 |
| C | 4.15685178  | -0.36396410 | -9.99369949 |
| C | -1.76322374 | 3.78192129  | -9.99369949 |
| C | -2.39362804 | -3.41795719 | -9.99369949 |
| C | -4.15685178 | 0.36396410  | -9.99369949 |
| C | 1.76322374  | -3.78192129 | -9.99369949 |
| C | 2.39362804  | 3.41795719  | -9.99369949 |
| C | -0.36396410 | 4.15685178  | 9.99369949  |
| C | 3.78192129  | -1.76322374 | 9.99369949  |
| C | -3.41795719 | -2.39362804 | 9.99369949  |

|   |             |             |              |
|---|-------------|-------------|--------------|
| C | 0.36396410  | -4.15685178 | 9.99369949   |
| C | -3.78192129 | 1.76322374  | 9.99369949   |
| C | 3.41795719  | 2.39362804  | 9.99369949   |
| C | -3.41348460 | 2.39319360  | 11.24289985  |
| C | -0.36582415 | -4.15276118 | 11.24289985  |
| C | 3.77930875  | 1.75956758  | 11.24289985  |
| C | 3.41348460  | -2.39319360 | 11.24289985  |
| C | 0.36582415  | 4.15276118  | 11.24289985  |
| C | -3.77930875 | -1.75956758 | 11.24289985  |
| C | 2.39319360  | -3.41348460 | -11.24289985 |
| C | -4.15276118 | -0.36582415 | -11.24289985 |
| C | 1.75956758  | 3.77930875  | -11.24289985 |
| C | -2.39319360 | 3.41348460  | -11.24289985 |
| C | 4.15276118  | 0.36582415  | -11.24289985 |
| C | -1.75956758 | -3.77930875 | -11.24289985 |
| C | 3.41348460  | -2.39319360 | -11.24289985 |
| C | 0.36582415  | 4.15276118  | -11.24289985 |
| C | -3.77930875 | -1.75956758 | -11.24289985 |
| C | -3.41348460 | 2.39319360  | -11.24289985 |
| C | -0.36582415 | -4.15276118 | -11.24289985 |
| C | 3.77930875  | 1.75956758  | -11.24289985 |
| C | -2.39319360 | 3.41348460  | 11.24289985  |
| C | 4.15276118  | 0.36582415  | 11.24289985  |
| C | -1.75956758 | -3.77930875 | 11.24289985  |
| C | 2.39319360  | -3.41348460 | 11.24289985  |
| C | -4.15276118 | -0.36582415 | 11.24289985  |
| C | 1.75956758  | 3.77930875  | 11.24289985  |
| C | -1.76123193 | 3.78052214  | 12.49452921  |
| C | -2.39341225 | -3.41553266 | 12.49452921  |
| C | 4.15464418  | -0.36498948 | 12.49452921  |
| C | 1.76123193  | -3.78052214 | 12.49452921  |
| C | 2.39341225  | 3.41553266  | 12.49452921  |
| C | -4.15464418 | 0.36498948  | 12.49452921  |
| C | 3.78052214  | -1.76123193 | -12.49452921 |
| C | -3.41553266 | -2.39341225 | -12.49452921 |
| C | -0.36498948 | 4.15464418  | -12.49452921 |
| C | -3.78052214 | 1.76123193  | -12.49452921 |
| C | 3.41553266  | 2.39341225  | -12.49452921 |
| C | 0.36498948  | -4.15464418 | -12.49452921 |
| C | 1.76123193  | -3.78052214 | -12.49452921 |
| C | 2.39341225  | 3.41553266  | -12.49452921 |
| C | -4.15464418 | 0.36498948  | -12.49452921 |
| C | -1.76123193 | 3.78052214  | -12.49452921 |
| C | -2.39341225 | -3.41553266 | -12.49452921 |
| C | 4.15464418  | -0.36498948 | -12.49452921 |
| C | -3.78052214 | 1.76123193  | 12.49452921  |
| C | 3.41553266  | 2.39341225  | 12.49452921  |
| C | 0.36498948  | -4.15464418 | 12.49452921  |
| C | 3.78052214  | -1.76123193 | 12.49452921  |
| C | -3.41553266 | -2.39341225 | 12.49452921  |
| C | -0.36498948 | 4.15464418  | 12.49452921  |
| C | 0.36385353  | 4.15707508  | 13.74127021  |
| C | -3.78205939 | -1.76343114 | 13.74127021  |
| C | 3.41820586  | -2.39364394 | 13.74127021  |
| C | -0.36385353 | -4.15707508 | 13.74127021  |
| C | 3.78205939  | 1.76343114  | 13.74127021  |
| C | -3.41820586 | 2.39364394  | 13.74127021  |
| C | 4.15707508  | 0.36385353  | -13.74127021 |
| C | -1.76343114 | -3.78205939 | -13.74127021 |
| C | -2.39364394 | 3.41820586  | -13.74127021 |
| C | -4.15707508 | -0.36385353 | -13.74127021 |
| C | 1.76343114  | 3.78205939  | -13.74127021 |
| C | 2.39364394  | -3.41820586 | -13.74127021 |
| C | -0.36385353 | -4.15707508 | -13.74127021 |
| C | 3.78205939  | 1.76343114  | -13.74127021 |
| C | -3.41820586 | 2.39364394  | -13.74127021 |
| C | 0.36385353  | 4.15707508  | -13.74127021 |
| C | -3.78205939 | -1.76343114 | -13.74127021 |
| C | 3.41820586  | -2.39364394 | -13.74127021 |
| C | -4.15707508 | -0.36385353 | 13.74127021  |

|   |             |             |              |
|---|-------------|-------------|--------------|
| C | 1.76343114  | 3.78205939  | 13.74127021  |
| C | 2.39364394  | -3.41820586 | 13.74127021  |
| C | 4.15707508  | 0.36385353  | 13.74127021  |
| C | -1.76343114 | -3.78205939 | 13.74127021  |
| C | -2.39364394 | 3.41820586  | 13.74127021  |
| C | 2.39318915  | 3.41370140  | 14.98996262  |
| C | -4.15294671 | 0.36571190  | 14.98996262  |
| C | 1.75975756  | -3.77941330 | 14.98996262  |
| C | -2.39318915 | -3.41370140 | 14.98996262  |
| C | 4.15294671  | -0.36571190 | 14.98996262  |
| C | -1.75975756 | 3.77941330  | 14.98996262  |
| C | 3.41370140  | 2.39318915  | -14.98996262 |
| C | 0.36571190  | -4.15294671 | -14.98996262 |
| C | -3.77941330 | 1.75975756  | -14.98996262 |
| C | -3.41370140 | -2.39318915 | -14.98996262 |
| C | -0.36571190 | 4.15294671  | -14.98996262 |
| C | 3.77941330  | -1.75975756 | -14.98996262 |
| C | -2.39318915 | -3.41370140 | -14.98996262 |
| C | 4.15294671  | -0.36571190 | -14.98996262 |
| C | -1.75975756 | 3.77941330  | -14.98996262 |
| C | 2.39318915  | 3.41370140  | -14.98996262 |
| C | -4.15294671 | 0.36571190  | -14.98996262 |
| C | 1.75975756  | -3.77941330 | -14.98996262 |
| C | -3.41370140 | -2.39318915 | 14.98996262  |
| C | -0.36571190 | 4.15294671  | 14.98996262  |
| C | 3.77941330  | -1.75975756 | 14.98996262  |
| C | 3.41370140  | 2.39318915  | 14.98996262  |
| C | 0.36571190  | -4.15294671 | 14.98996262  |
| C | -3.77941330 | 1.75975756  | 14.98996262  |
| C | 3.78019239  | 1.76084493  | 16.24187942  |
| C | -3.41503264 | 2.39332018  | 16.24187942  |
| C | -0.36515975 | -4.15416511 | 16.24187942  |
| C | -3.78019239 | -1.76084493 | 16.24187942  |
| C | 3.41503264  | -2.39332018 | 16.24187942  |
| C | 0.36515975  | 4.15416511  | 16.24187942  |
| C | 1.76084493  | 3.78019239  | -16.24187942 |
| C | 2.39332018  | -3.41503264 | -16.24187942 |
| C | -4.15416511 | -0.36515975 | -16.24187942 |
| C | -1.76084493 | -3.78019239 | -16.24187942 |
| C | -2.39332018 | 3.41503264  | -16.24187942 |
| C | 4.15416511  | 0.36515975  | -16.24187942 |
| C | -3.78019239 | -1.76084493 | -16.24187942 |
| C | 3.41503264  | -2.39332018 | -16.24187942 |
| C | 0.36515975  | 4.15416511  | -16.24187942 |
| C | 3.78019239  | 1.76084493  | -16.24187942 |
| C | -3.41503264 | 2.39332018  | -16.24187942 |
| C | -0.36515975 | -4.15416511 | -16.24187942 |
| C | -1.76084493 | -3.78019239 | 16.24187942  |
| C | -2.39332018 | 3.41503264  | 16.24187942  |
| C | 4.15416511  | 0.36515975  | 16.24187942  |
| C | 1.76084493  | 3.78019239  | 16.24187942  |
| C | 2.39332018  | -3.41503264 | 16.24187942  |
| C | -4.15416511 | -0.36515975 | 16.24187942  |
| C | 4.15723803  | -0.36374588 | 17.48895467  |
| C | -1.76360584 | 3.78214668  | 17.48895467  |
| C | -2.39363219 | -3.41840080 | 17.48895467  |
| C | -4.15723803 | 0.36374588  | 17.48895467  |
| C | 1.76360584  | -3.78214668 | 17.48895467  |
| C | 2.39363219  | 3.41840080  | 17.48895467  |
| C | -0.36374588 | 4.15723803  | -17.48895467 |
| C | 3.78214668  | -1.76360584 | -17.48895467 |
| C | -3.41840080 | -2.39363219 | -17.48895467 |
| C | 0.36374588  | -4.15723803 | -17.48895467 |
| C | -3.78214668 | 1.76360584  | -17.48895467 |
| C | 3.41840080  | 2.39363219  | -17.48895467 |
| C | -4.15723803 | 0.36374588  | -17.48895467 |
| C | 1.76360584  | -3.78214668 | -17.48895467 |
| C | 2.39363219  | 3.41840080  | -17.48895467 |
| C | 4.15723803  | -0.36374588 | -17.48895467 |
| C | -1.76360584 | 3.78214668  | -17.48895467 |

|   |             |             |              |
|---|-------------|-------------|--------------|
| C | -2.39363219 | -3.41840080 | -17.48895467 |
| C | 0.36374588  | -4.15723803 | 17.48895467  |
| C | -3.78214668 | 1.76360584  | 17.48895467  |
| C | 3.41840080  | 2.39363219  | 17.48895467  |
| C | -0.36374588 | 4.15723803  | 17.48895467  |
| C | 3.78214668  | -1.76360584 | 17.48895467  |
| C | -3.41840080 | -2.39363219 | 17.48895467  |
| C | 3.41399240  | -2.39320847 | 18.73714398  |
| C | 0.36558313  | 4.15320838  | 18.73714398  |
| C | -3.77957553 | -1.75999991 | 18.73714398  |
| C | -3.41399240 | 2.39320847  | 18.73714398  |
| C | -0.36558313 | -4.15320838 | 18.73714398  |
| C | 3.77957553  | 1.75999991  | 18.73714398  |
| C | -2.39320847 | 3.41399240  | -18.73714398 |
| C | 4.15320838  | 0.36558313  | -18.73714398 |
| C | -1.75999991 | -3.77957553 | -18.73714398 |
| C | 2.39320847  | -3.41399240 | -18.73714398 |
| C | -4.15320838 | -0.36558313 | -18.73714398 |
| C | 1.75999991  | 3.77957553  | -18.73714398 |
| C | -3.41399240 | 2.39320847  | -18.73714398 |
| C | -0.36558313 | -4.15320838 | -18.73714398 |
| C | 3.77957553  | 1.75999991  | -18.73714398 |
| C | 3.41399240  | -2.39320847 | -18.73714398 |
| C | 0.36558313  | 4.15320838  | -18.73714398 |
| C | -3.77957553 | -1.75999991 | -18.73714398 |
| C | 2.39320847  | -3.41399240 | 18.73714398  |
| C | -4.15320838 | -0.36558313 | 18.73714398  |
| C | 1.75999991  | 3.77957553  | 18.73714398  |
| C | -2.39320847 | 3.41399240  | 18.73714398  |
| C | 4.15320838  | 0.36558313  | 18.73714398  |
| C | -1.75999991 | -3.77957553 | 18.73714398  |
| C | 1.76042287  | -3.77988188 | 19.98931329  |
| C | 2.39326230  | 3.41451187  | 19.98931329  |
| C | -4.15368517 | 0.36537002  | 19.98931329  |
| C | -1.76042287 | 3.77988188  | 19.98931329  |
| C | -2.39326230 | -3.41451187 | 19.98931329  |
| C | 4.15368517  | -0.36537002 | 19.98931329  |
| C | -3.77988188 | 1.76042287  | -19.98931329 |
| C | 3.41451187  | 2.39326230  | -19.98931329 |
| C | 0.36537002  | -4.15368517 | -19.98931329 |
| C | 3.77988188  | -1.76042287 | -19.98931329 |
| C | -3.41451187 | -2.39326230 | -19.98931329 |
| C | -0.36537002 | 4.15368517  | -19.98931329 |
| C | -1.76042287 | 3.77988188  | -19.98931329 |
| C | -2.39326230 | -3.41451187 | -19.98931329 |
| C | 4.15368517  | -0.36537002 | -19.98931329 |
| C | 1.76042287  | -3.77988188 | -19.98931329 |
| C | 2.39326230  | 3.41451187  | -19.98931329 |
| C | -4.15368517 | 0.36537002  | -19.98931329 |
| C | 3.77988188  | -1.76042287 | 19.98931329  |
| C | -3.41451187 | -2.39326230 | 19.98931329  |
| C | -0.36537002 | 4.15368517  | 19.98931329  |
| C | -3.77988188 | 1.76042287  | 19.98931329  |
| C | 3.41451187  | 2.39326230  | 19.98931329  |
| C | 0.36537002  | -4.15368517 | 19.98931329  |
| C | -0.36367342 | -4.15730163 | 21.23681415  |
| C | 3.78216553  | 1.76370039  | 21.23681415  |
| C | -3.41849211 | 2.39360124  | 21.23681415  |
| C | 0.36367342  | 4.15730163  | 21.23681415  |
| C | -3.78216553 | -1.76370039 | 21.23681415  |
| C | 3.41849211  | -2.39360124 | 21.23681415  |
| C | -4.15730163 | -0.36367342 | -21.23681415 |
| C | 1.76370039  | 3.78216553  | -21.23681415 |
| C | 2.39360124  | -3.41849211 | -21.23681415 |
| C | 4.15730163  | 0.36367342  | -21.23681415 |
| C | -1.76370039 | -3.78216553 | -21.23681415 |
| C | -2.39360124 | 3.41849211  | -21.23681415 |
| C | 0.36367342  | 4.15730163  | -21.23681415 |
| C | -3.78216553 | -1.76370039 | -21.23681415 |
| C | 3.41849211  | -2.39360124 | -21.23681415 |

|   |             |             |              |
|---|-------------|-------------|--------------|
| C | -0.36367342 | -4.15730163 | -21.23681415 |
| C | 3.78216553  | 1.76370039  | -21.23681415 |
| C | -3.41849211 | 2.39360124  | -21.23681415 |
| C | 4.15730163  | 0.36367342  | 21.23681415  |
| C | -1.76370039 | -3.78216553 | 21.23681415  |
| C | -2.39360124 | 3.41849211  | 21.23681415  |
| C | -4.15730163 | -0.36367342 | 21.23681415  |
| C | 1.76370039  | 3.78216553  | 21.23681415  |
| C | 2.39360124  | -3.41849211 | 21.23681415  |
| C | -2.39315719 | -3.41424730 | 22.48453521  |
| C | 4.15340349  | -0.36541127 | 22.48453521  |
| C | -1.76024630 | 3.77965857  | 22.48453521  |
| C | 2.39315719  | 3.41424730  | 22.48453521  |
| C | -4.15340349 | 0.36541127  | 22.48453521  |
| C | 1.76024630  | -3.77965857 | 22.48453521  |
| C | -3.41424730 | -2.39315719 | -22.48453521 |
| C | -0.36541127 | 4.15340349  | -22.48453521 |
| C | 3.77965857  | -1.76024630 | -22.48453521 |
| C | 3.41424730  | 2.39315719  | -22.48453521 |
| C | 0.36541127  | -4.15340349 | -22.48453521 |
| C | -3.77965857 | 1.76024630  | -22.48453521 |
| C | 2.39315719  | 3.41424730  | -22.48453521 |
| C | -4.15340349 | 0.36541127  | -22.48453521 |
| C | 1.76024630  | -3.77965857 | -22.48453521 |
| C | -2.39315719 | -3.41424730 | -22.48453521 |
| C | 4.15340349  | -0.36541127 | -22.48453521 |
| C | -1.76024630 | 3.77965857  | -22.48453521 |
| C | 3.41424730  | 2.39315719  | 22.48453521  |
| C | 0.36541127  | -4.15340349 | 22.48453521  |
| C | -3.77965857 | 1.76024630  | 22.48453521  |
| C | -3.41424730 | -2.39315719 | 22.48453521  |
| C | -0.36541127 | 4.15340349  | 22.48453521  |
| C | 3.77965857  | -1.76024630 | 22.48453521  |
| C | -3.77941873 | -1.75998061 | 23.73694578  |
| C | 3.41389728  | -2.39308233 | 23.73694578  |
| C | 0.36552145  | 4.15306293  | 23.73694578  |
| C | 3.77941873  | 1.75998061  | 23.73694578  |
| C | -3.41389728 | 2.39308233  | 23.73694578  |
| C | -0.36552145 | -4.15306293 | 23.73694578  |
| C | -1.75998061 | -3.77941873 | -23.73694578 |
| C | -2.39308233 | 3.41389728  | -23.73694578 |
| C | 4.15306293  | 0.36552145  | -23.73694578 |
| C | 1.75998061  | 3.77941873  | -23.73694578 |
| C | 2.39308233  | -3.41389728 | -23.73694578 |
| C | -4.15306293 | -0.36552145 | -23.73694578 |
| C | 3.77941873  | 1.75998061  | -23.73694578 |
| C | -3.41389728 | 2.39308233  | -23.73694578 |
| C | -0.36552145 | -4.15306293 | -23.73694578 |
| C | -3.77941873 | -1.75998061 | -23.73694578 |
| C | 3.41389728  | -2.39308233 | -23.73694578 |
| C | 0.36552145  | 4.15306293  | -23.73694578 |
| C | 1.75998061  | 3.77941873  | 23.73694578  |
| C | 2.39308233  | -3.41389728 | 23.73694578  |
| C | -4.15306293 | -0.36552145 | 23.73694578  |
| C | -1.75998061 | -3.77941873 | 23.73694578  |
| C | -2.39308233 | 3.41389728  | 23.73694578  |
| C | 4.15306293  | 0.36552145  | 23.73694578  |
| C | -4.15725880 | 0.36359599  | 24.98496629  |
| C | 1.76374603  | -3.78208973 | 24.98496629  |
| C | 2.39351277  | 3.41849374  | 24.98496629  |
| C | 4.15725880  | -0.36359599 | 24.98496629  |
| C | -1.76374603 | 3.78208973  | 24.98496629  |
| C | -2.39351277 | -3.41849374 | 24.98496629  |
| C | 0.36359599  | -4.15725880 | -24.98496629 |
| C | -3.78208973 | 1.76374603  | -24.98496629 |
| C | 3.41849374  | 2.39351277  | -24.98496629 |
| C | -0.36359599 | 4.15725880  | -24.98496629 |
| C | 3.78208973  | -1.76374603 | -24.98496629 |
| C | -3.41849374 | -2.39351277 | -24.98496629 |
| C | 4.15725880  | -0.36359599 | -24.98496629 |

|   |             |             |              |
|---|-------------|-------------|--------------|
| C | -1.76374603 | 3.78208973  | -24.98496629 |
| C | -2.39351277 | -3.41849374 | -24.98496629 |
| C | -4.15725880 | 0.36359599  | -24.98496629 |
| C | 1.76374603  | -3.78208973 | -24.98496629 |
| C | 2.39351277  | 3.41849374  | -24.98496629 |
| C | -0.36359599 | 4.15725880  | 24.98496629  |
| C | 3.78208973  | -1.76374603 | 24.98496629  |
| C | -3.41849374 | -2.39351277 | 24.98496629  |
| C | 0.36359599  | -4.15725880 | 24.98496629  |
| C | -3.78208973 | 1.76374603  | 24.98496629  |
| C | 3.41849374  | 2.39351277  | 24.98496629  |
| C | -3.41457677 | 2.39312110  | 26.23223160  |
| C | -0.36521528 | -4.15367078 | 26.23223160  |
| C | 3.77979205  | 1.76054968  | 26.23223160  |
| C | 3.41457677  | -2.39312110 | 26.23223160  |
| C | 0.36521528  | 4.15367078  | 26.23223160  |
| C | -3.77979205 | -1.76054968 | 26.23223160  |
| C | 2.39312110  | -3.41457677 | -26.23223160 |
| C | -4.15367078 | -0.36521528 | -26.23223160 |
| C | 1.76054968  | 3.77979205  | -26.23223160 |
| C | -2.39312110 | 3.41457677  | -26.23223160 |
| C | 4.15367078  | 0.36521528  | -26.23223160 |
| C | -1.76054968 | -3.77979205 | -26.23223160 |
| C | 3.41457677  | -2.39312110 | -26.23223160 |
| C | 0.36521528  | 4.15367078  | -26.23223160 |
| C | -3.77979205 | -1.76054968 | -26.23223160 |
| C | -3.41457677 | 2.39312110  | -26.23223160 |
| C | -0.36521528 | -4.15367078 | -26.23223160 |
| C | 3.77979205  | 1.76054968  | -26.23223160 |
| C | -2.39312110 | 3.41457677  | 26.23223160  |
| C | 4.15367078  | 0.36521528  | 26.23223160  |
| C | -1.76054968 | -3.77979205 | 26.23223160  |
| C | 2.39312110  | -3.41457677 | 26.23223160  |
| C | -4.15367078 | -0.36521528 | 26.23223160  |
| C | 1.76054968  | 3.77979205  | 26.23223160  |
| C | -1.75956712 | 3.77914588  | 27.48481151  |
| C | -2.39305277 | -3.41340276 | 27.48481151  |
| C | 4.15261989  | -0.36574311 | 27.48481151  |
| C | 1.75956712  | -3.77914588 | 27.48481151  |
| C | 2.39305277  | 3.41340276  | 27.48481151  |
| C | -4.15261989 | 0.36574311  | 27.48481151  |
| C | 3.77914588  | -1.75956712 | -27.48481151 |
| C | -3.41340276 | -2.39305277 | -27.48481151 |
| C | -0.36574311 | 4.15261989  | -27.48481151 |
| C | -3.77914588 | 1.75956712  | -27.48481151 |
| C | 3.41340276  | 2.39305277  | -27.48481151 |
| C | 0.36574311  | -4.15261989 | -27.48481151 |
| C | 1.75956712  | -3.77914588 | -27.48481151 |
| C | 2.39305277  | 3.41340276  | -27.48481151 |
| C | -4.15261989 | 0.36574311  | -27.48481151 |
| C | -1.75956712 | 3.77914588  | -27.48481151 |
| C | -2.39305277 | -3.41340276 | -27.48481151 |
| C | 4.15261989  | -0.36574311 | -27.48481151 |
| C | -3.77914588 | 1.75956712  | 27.48481151  |
| C | 3.41340276  | 2.39305277  | 27.48481151  |
| C | 0.36574311  | -4.15261989 | 27.48481151  |
| C | 3.77914588  | -1.75956712 | 27.48481151  |
| C | -3.41340276 | -2.39305277 | 27.48481151  |
| C | -0.36574311 | 4.15261989  | 27.48481151  |
| C | 0.36355508  | 4.15728633  | 28.73342374  |
| C | -3.78209311 | -1.76379523 | 28.73342374  |
| C | 3.41853804  | -2.39349110 | 28.73342374  |
| C | -0.36355508 | -4.15728633 | 28.73342374  |
| C | 3.78209311  | 1.76379523  | 28.73342374  |
| C | -3.41853804 | 2.39349110  | 28.73342374  |
| C | 4.15728633  | 0.36355508  | -28.73342374 |
| C | -1.76379523 | -3.78209311 | -28.73342374 |
| C | -2.39349110 | 3.41853804  | -28.73342374 |
| C | -4.15728633 | -0.36355508 | -28.73342374 |
| C | 1.76379523  | 3.78209311  | -28.73342374 |

|   |             |             |              |
|---|-------------|-------------|--------------|
| C | 2.39349110  | -3.41853804 | -28.73342374 |
| C | -0.36355508 | -4.15728633 | -28.73342374 |
| C | 3.78209311  | 1.76379523  | -28.73342374 |
| C | -3.41853804 | 2.39349110  | -28.73342374 |
| C | 0.36355508  | 4.15728633  | -28.73342374 |
| C | -3.78209311 | -1.76379523 | -28.73342374 |
| C | 3.41853804  | -2.39349110 | -28.73342374 |
| C | -4.15728633 | -0.36355508 | 28.73342374  |
| C | 1.76379523  | 3.78209311  | 28.73342374  |
| C | 2.39349110  | -3.41853804 | 28.73342374  |
| C | 4.15728633  | 0.36355508  | 28.73342374  |
| C | -1.76379523 | -3.78209311 | 28.73342374  |
| C | -2.39349110 | 3.41853804  | 28.73342374  |
| C | 2.39311964  | 3.41502365  | 29.98020427  |
| C | -4.15405706 | 0.36499057  | 29.98020427  |
| C | 1.76093742  | -3.78001422 | 29.98020427  |
| C | -2.39311964 | -3.41502365 | 29.98020427  |
| C | 4.15405706  | -0.36499057 | 29.98020427  |
| C | -1.76093742 | 3.78001422  | 29.98020427  |
| C | 3.41502365  | 2.39311964  | -29.98020427 |
| C | 0.36499057  | -4.15405706 | -29.98020427 |
| C | -3.78001422 | 1.76093742  | -29.98020427 |
| C | -3.41502365 | -2.39311964 | -29.98020427 |
| C | -0.36499057 | 4.15405706  | -29.98020427 |
| C | 3.78001422  | -1.76093742 | -29.98020427 |
| C | -2.39311964 | -3.41502365 | -29.98020427 |
| C | 4.15405706  | -0.36499057 | -29.98020427 |
| C | -1.76093742 | 3.78001422  | -29.98020427 |
| C | 2.39311964  | 3.41502365  | -29.98020427 |
| C | -4.15405706 | 0.36499057  | -29.98020427 |
| C | 1.76093742  | -3.78001422 | -29.98020427 |
| C | -3.41502365 | -2.39311964 | 29.98020427  |
| C | -0.36499057 | 4.15405706  | 29.98020427  |
| C | 3.78001422  | -1.76093742 | 29.98020427  |
| C | 3.41502365  | 2.39311964  | 29.98020427  |
| C | 0.36499057  | -4.15405706 | 29.98020427  |
| C | -3.78001422 | 1.76093742  | 29.98020427  |
| C | 3.77863619  | 1.75907396  | 31.23293353  |
| C | -3.41272083 | 2.39285795  | 31.23293353  |
| C | -0.36591536 | -4.15193191 | 31.23293353  |
| C | -3.77863619 | -1.75907396 | 31.23293353  |
| C | 3.41272083  | -2.39285795 | 31.23293353  |
| C | 0.36591536  | 4.15193191  | 31.23293353  |
| C | 1.75907396  | 3.77863619  | -31.23293353 |
| C | 2.39285795  | -3.41272083 | -31.23293353 |
| C | -4.15193191 | -0.36591536 | -31.23293353 |
| C | -1.75907396 | -3.77863619 | -31.23293353 |
| C | -2.39285795 | 3.41272083  | -31.23293353 |
| C | 4.15193191  | 0.36591536  | -31.23293353 |
| C | -3.77863619 | -1.75907396 | -31.23293353 |
| C | 3.41272083  | -2.39285795 | -31.23293353 |
| C | 0.36591536  | 4.15193191  | -31.23293353 |
| C | 3.77863619  | 1.75907396  | -31.23293353 |
| C | -3.41272083 | 2.39285795  | -31.23293353 |
| C | -0.36591536 | -4.15193191 | -31.23293353 |
| C | -1.75907396 | -3.77863619 | 31.23293353  |
| C | -2.39285795 | 3.41272083  | 31.23293353  |
| C | 4.15193191  | 0.36591536  | 31.23293353  |
| C | 1.75907396  | 3.77863619  | 31.23293353  |
| C | 2.39285795  | -3.41272083 | 31.23293353  |
| C | -4.15193191 | -0.36591536 | 31.23293353  |
| C | 4.15699712  | -0.36347872 | 32.48226169  |
| C | -1.76371675 | 3.78180447  | 32.48226169  |
| C | -2.39328037 | -3.41832575 | 32.48226169  |
| C | -4.15699712 | 0.36347872  | 32.48226169  |
| C | 1.76371675  | -3.78180447 | 32.48226169  |
| C | 2.39328037  | 3.41832575  | 32.48226169  |
| C | -0.36347872 | 4.15699712  | -32.48226169 |
| C | 3.78180447  | -1.76371675 | -32.48226169 |
| C | -3.41832575 | -2.39328037 | -32.48226169 |



|   |             |             |              |
|---|-------------|-------------|--------------|
| C | 0.36347872  | -4.15699712 | -32.48226169 |
| C | -3.78180447 | 1.76371675  | -32.48226169 |
| C | 3.41832575  | 2.39328037  | -32.48226169 |
| C | -4.15699712 | 0.36347872  | -32.48226169 |
| C | 1.76371675  | -3.78180447 | -32.48226169 |
| C | 2.39328037  | 3.41832575  | -32.48226169 |
| C | 4.15699712  | -0.36347872 | -32.48226169 |
| C | -1.76371675 | 3.78180447  | -32.48226169 |
| C | -2.39328037 | -3.41832575 | -32.48226169 |
| C | 0.36347872  | -4.15699712 | 32.48226169  |
| C | -3.78180447 | 1.76371675  | 32.48226169  |
| C | 3.41832575  | 2.39328037  | 32.48226169  |
| C | -0.36347872 | 4.15699712  | 32.48226169  |
| C | 3.78180447  | -1.76371675 | 32.48226169  |
| C | -3.41832575 | -2.39328037 | 32.48226169  |
| C | 3.41533132  | -2.39294296 | 33.72850782  |
| C | 0.36468373  | 4.15423517  | 33.72850782  |
| C | -3.78001505 | -1.76129221 | 33.72850782  |
| C | -3.41533132 | 2.39294296  | 33.72850782  |
| C | -0.36468373 | -4.15423517 | 33.72850782  |
| C | 3.78001505  | 1.76129221  | 33.72850782  |
| C | -2.39294296 | 3.41533132  | -33.72850782 |
| C | 4.15423517  | 0.36468373  | -33.72850782 |
| C | -1.76129221 | -3.78001505 | -33.72850782 |
| C | 2.39294296  | -3.41533132 | -33.72850782 |
| C | -4.15423517 | -0.36468373 | -33.72850782 |
| C | 1.76129221  | 3.78001505  | -33.72850782 |
| C | -3.41533132 | 2.39294296  | -33.72850782 |
| C | -0.36468373 | -4.15423517 | -33.72850782 |
| C | 3.78001505  | 1.76129221  | -33.72850782 |
| C | 3.41533132  | -2.39294296 | -33.72850782 |
| C | 0.36468373  | 4.15423517  | -33.72850782 |
| C | -3.78001505 | -1.76129221 | -33.72850782 |
| C | 2.39294296  | -3.41533132 | 33.72850782  |
| C | -4.15423517 | -0.36468373 | 33.72850782  |
| C | 1.76129221  | 3.78001505  | 33.72850782  |
| C | -2.39294296 | 3.41533132  | 33.72850782  |
| C | 4.15423517  | 0.36468373  | 33.72850782  |
| C | -1.76129221 | -3.78001505 | 33.72850782  |
| C | 1.75846800  | -3.77805983 | 34.98129572  |
| C | 2.39266179  | 3.41190788  | 34.98129572  |
| C | -4.15112979 | 0.36615195  | 34.98129572  |
| C | -1.75846800 | 3.77805983  | 34.98129572  |
| C | -2.39266179 | -3.41190788 | 34.98129572  |
| C | 4.15112979  | -0.36615195 | 34.98129572  |
| C | -3.77805983 | 1.75846800  | -34.98129572 |
| C | 3.41190788  | 2.39266179  | -34.98129572 |
| C | 0.36615195  | -4.15112979 | -34.98129572 |
| C | 3.77805983  | -1.75846800 | -34.98129572 |
| C | -3.41190788 | -2.39266179 | -34.98129572 |
| C | -0.36615195 | 4.15112979  | -34.98129572 |
| C | -1.75846800 | 3.77805983  | -34.98129572 |
| C | -2.39266179 | -3.41190788 | -34.98129572 |
| C | 4.15112979  | -0.36615195 | -34.98129572 |
| C | 1.75846800  | -3.77805983 | -34.98129572 |
| C | 2.39266179  | 3.41190788  | -34.98129572 |
| C | -4.15112979 | 0.36615195  | -34.98129572 |
| C | 3.77805983  | -1.75846800 | 34.98129572  |
| C | -3.41190788 | -2.39266179 | 34.98129572  |
| C | -0.36615195 | 4.15112979  | 34.98129572  |
| C | -3.77805983 | 1.75846800  | 34.98129572  |
| C | 3.41190788  | 2.39266179  | 34.98129572  |
| C | 0.36615195  | -4.15112979 | 34.98129572  |
| C | -0.36348259 | -4.15680945 | 36.23143439  |
| C | 3.78164388  | 1.76361957  | 36.23143439  |
| C | -3.41816129 | 2.39318988  | 36.23143439  |
| C | 0.36348259  | 4.15680945  | 36.23143439  |
| C | -3.78164388 | -1.76361957 | 36.23143439  |
| C | 3.41816129  | -2.39318988 | 36.23143439  |
| C | -4.15680945 | -0.36348259 | -36.23143439 |

|   |             |             |              |
|---|-------------|-------------|--------------|
| C | 1.76361957  | 3.78164388  | -36.23143439 |
| C | 2.39318988  | -3.41816129 | -36.23143439 |
| C | 4.15680945  | 0.36348259  | -36.23143439 |
| C | -1.76361957 | -3.78164388 | -36.23143439 |
| C | -2.39318988 | 3.41816129  | -36.23143439 |
| C | 0.36348259  | 4.15680945  | -36.23143439 |
| C | -3.78164388 | -1.76361957 | -36.23143439 |
| C | 3.41816129  | -2.39318988 | -36.23143439 |
| C | -0.36348259 | -4.15680945 | -36.23143439 |
| C | 3.78164388  | 1.76361957  | -36.23143439 |
| C | -3.41816129 | 2.39318988  | -36.23143439 |
| C | 4.15680945  | 0.36348259  | 36.23143439  |
| C | -1.76361957 | -3.78164388 | 36.23143439  |
| C | -2.39318988 | 3.41816129  | 36.23143439  |
| C | -4.15680945 | -0.36348259 | 36.23143439  |
| C | 1.76361957  | 3.78164388  | 36.23143439  |
| C | 2.39318988  | -3.41816129 | 36.23143439  |
| C | -2.39285369 | -3.41584504 | 37.47700039  |
| C | 4.15463543  | -0.36434957 | 37.47700039  |
| C | -1.76178173 | 3.78019461  | 37.47700039  |
| C | 2.39285369  | 3.41584504  | 37.47700039  |
| C | -4.15463543 | 0.36434957  | 37.47700039  |
| C | 1.76178173  | -3.78019461 | 37.47700039  |
| C | -3.41584504 | -2.39285369 | -37.47700039 |
| C | -0.36434957 | 4.15463543  | -37.47700039 |
| C | 3.78019461  | -1.76178173 | -37.47700039 |
| C | 3.41584504  | 2.39285369  | -37.47700039 |
| C | 0.36434957  | -4.15463543 | -37.47700039 |
| C | -3.78019461 | 1.76178173  | -37.47700039 |
| C | 2.39285369  | 3.41584504  | -37.47700039 |
| C | -4.15463543 | 0.36434957  | -37.47700039 |
| C | 1.76178173  | -3.78019461 | -37.47700039 |
| C | -2.39285369 | -3.41584504 | -37.47700039 |
| C | 4.15463543  | -0.36434957 | -37.47700039 |
| C | -1.76178173 | 3.78019461  | -37.47700039 |
| C | 3.41584504  | 2.39285369  | 37.47700039  |
| C | 0.36434957  | -4.15463543 | 37.47700039  |
| C | -3.78019461 | 1.76178173  | 37.47700039  |
| C | -3.41584504 | -2.39285369 | 37.47700039  |
| C | -0.36434957 | 4.15463543  | 37.47700039  |
| C | 3.78019461  | -1.76178173 | 37.47700039  |
| C | -3.77726499 | -1.75767051 | 38.72977741  |
| C | 3.41081981  | -2.39237218 | 38.72977741  |
| C | 0.36644518  | 4.15004269  | 38.72977741  |
| C | 3.77726499  | 1.75767051  | 38.72977741  |
| C | -3.41081981 | 2.39237218  | 38.72977741  |
| C | -0.36644518 | -4.15004269 | 38.72977741  |
| C | -1.75767051 | -3.77726499 | -38.72977741 |
| C | -2.39237218 | 3.41081981  | -38.72977741 |
| C | 4.15004269  | 0.36644518  | -38.72977741 |
| C | 1.75767051  | 3.77726499  | -38.72977741 |
| C | 2.39237218  | -3.41081981 | -38.72977741 |
| C | -4.15004269 | -0.36644518 | -38.72977741 |
| C | 3.77726499  | 1.75767051  | -38.72977741 |
| C | -3.41081981 | 2.39237218  | -38.72977741 |
| C | -0.36644518 | -4.15004269 | -38.72977741 |
| C | -3.77726499 | -1.75767051 | -38.72977741 |
| C | 3.41081981  | -2.39237218 | -38.72977741 |
| C | 0.36644518  | 4.15004269  | -38.72977741 |
| C | 1.75767051  | 3.77726499  | 38.72977741  |
| C | 2.39237218  | -3.41081981 | 38.72977741  |
| C | -4.15004269 | -0.36644518 | 38.72977741  |
| C | -1.75767051 | -3.77726499 | 38.72977741  |
| C | -2.39237218 | 3.41081981  | 38.72977741  |
| C | 4.15004269  | 0.36644518  | 38.72977741  |
| C | -4.15660465 | 0.36346550  | 39.98106602  |
| C | 1.76353197  | -3.78145797 | 39.98106602  |
| C | 2.39307268  | 3.41799247  | 39.98106602  |
| C | 4.15660465  | -0.36346550 | 39.98106602  |
| C | -1.76353197 | 3.78145797  | 39.98106602  |

|   |             |             |              |
|---|-------------|-------------|--------------|
| C | -2.39307268 | -3.41799247 | 39.98106602  |
| C | 0.36346550  | -4.15660465 | -39.98106602 |
| C | -3.78145797 | 1.76353197  | -39.98106602 |
| C | 3.41799247  | 2.39307268  | -39.98106602 |
| C | -0.36346550 | 4.15660465  | -39.98106602 |
| C | 3.78145797  | -1.76353197 | -39.98106602 |
| C | -3.41799247 | -2.39307268 | -39.98106602 |
| C | 4.15660465  | -0.36346550 | -39.98106602 |
| C | -1.76353197 | 3.78145797  | -39.98106602 |
| C | -2.39307268 | -3.41799247 | -39.98106602 |
| C | -4.15660465 | 0.36346550  | -39.98106602 |
| C | 1.76353197  | -3.78145797 | -39.98106602 |
| C | 2.39307268  | 3.41799247  | -39.98106602 |
| C | -0.36346550 | 4.15660465  | 39.98106602  |
| C | 3.78145797  | -1.76353197 | 39.98106602  |
| C | -3.41799247 | -2.39307268 | 39.98106602  |
| C | 0.36346550  | -4.15660465 | 39.98106602  |
| C | -3.78145797 | 1.76353197  | 39.98106602  |
| C | 3.41799247  | 2.39307268  | 39.98106602  |
| C | -3.41732906 | 2.39323503  | 41.22569149  |
| C | -0.36393781 | -4.15611129 | 41.22569149  |
| C | 3.78126687  | 1.76287626  | 41.22569149  |
| C | 3.41732906  | -2.39323503 | 41.22569149  |
| C | 0.36393781  | 4.15611129  | 41.22569149  |
| C | -3.78126687 | -1.76287626 | 41.22569149  |
| C | 2.39323503  | -3.41732906 | -41.22569149 |
| C | -4.15611129 | -0.36393781 | -41.22569149 |
| C | 1.76287626  | 3.78126687  | -41.22569149 |
| C | -2.39323503 | 3.41732906  | -41.22569149 |
| C | 4.15611129  | 0.36393781  | -41.22569149 |
| C | -1.76287626 | -3.78126687 | -41.22569149 |
| C | 3.41732906  | -2.39323503 | -41.22569149 |
| C | 0.36393781  | 4.15611129  | -41.22569149 |
| C | -3.78126687 | -1.76287626 | -41.22569149 |
| C | -3.41732906 | 2.39323503  | -41.22569149 |
| C | -0.36393781 | -4.15611129 | -41.22569149 |
| C | 3.78126687  | 1.76287626  | -41.22569149 |
| C | -2.39323503 | 3.41732906  | 41.22569149  |
| C | 4.15611129  | 0.36393781  | 41.22569149  |
| C | -1.76287626 | -3.78126687 | 41.22569149  |
| C | 2.39323503  | -3.41732906 | 41.22569149  |
| C | -4.15611129 | -0.36393781 | 41.22569149  |
| C | 1.76287626  | 3.78126687  | 41.22569149  |
| C | -1.75691973 | 3.77753273  | 42.47810733  |
| C | -2.39297944 | -3.41030348 | 42.47810733  |
| C | 4.14989917  | -0.36722925 | 42.47810733  |
| C | 1.75691973  | -3.77753273 | 42.47810733  |
| C | 2.39297944  | 3.41030348  | 42.47810733  |
| C | -4.14989917 | 0.36722925  | 42.47810733  |
| C | 3.77753273  | -1.75691973 | -42.47810733 |
| C | -3.41030348 | -2.39297944 | -42.47810733 |
| C | -0.36722925 | 4.14989917  | -42.47810733 |
| C | -3.77753273 | 1.75691973  | -42.47810733 |
| C | 3.41030348  | 2.39297944  | -42.47810733 |
| C | 0.36722925  | -4.14989917 | -42.47810733 |
| C | 1.75691973  | -3.77753273 | -42.47810733 |
| C | 2.39297944  | 3.41030348  | -42.47810733 |
| C | -4.14989917 | 0.36722925  | -42.47810733 |
| C | -1.75691973 | 3.77753273  | -42.47810733 |
| C | -2.39297944 | -3.41030348 | -42.47810733 |
| C | 4.14989917  | -0.36722925 | -42.47810733 |
| C | -3.77753273 | 1.75691973  | 42.47810733  |
| C | 3.41030348  | 2.39297944  | 42.47810733  |
| C | 0.36722925  | -4.14989917 | 42.47810733  |
| C | 3.77753273  | -1.75691973 | 42.47810733  |
| C | -3.41030348 | -2.39297944 | 42.47810733  |
| C | -0.36722925 | 4.14989917  | 42.47810733  |
| C | 0.36348949  | 4.15619916  | 43.73124422  |
| C | -3.78111880 | -1.76330845 | 43.73124422  |
| C | 3.41762931  | -2.39289071 | 43.73124422  |

|   |             |             |              |
|---|-------------|-------------|--------------|
| C | -0.36348949 | -4.15619916 | 43.73124422  |
| C | 3.78111880  | 1.76330845  | 43.73124422  |
| C | -3.41762931 | 2.39289071  | 43.73124422  |
| C | 4.15619916  | 0.36348949  | -43.73124422 |
| C | -1.76330845 | -3.78111880 | -43.73124422 |
| C | -2.39289071 | 3.41762931  | -43.73124422 |
| C | -4.15619916 | -0.36348949 | -43.73124422 |
| C | 1.76330845  | 3.78111880  | -43.73124422 |
| C | 2.39289071  | -3.41762931 | -43.73124422 |
| C | -0.36348949 | -4.15619916 | -43.73124422 |
| C | 3.78111880  | 1.76330845  | -43.73124422 |
| C | -3.41762931 | 2.39289071  | -43.73124422 |
| C | 0.36348949  | 4.15619916  | -43.73124422 |
| C | -3.78111880 | -1.76330845 | -43.73124422 |
| C | 3.41762931  | -2.39289071 | -43.73124422 |
| C | -4.15619916 | -0.36348949 | 43.73124422  |
| C | 1.76330845  | 3.78111880  | 43.73124422  |
| C | 2.39289071  | -3.41762931 | 43.73124422  |
| C | 4.15619916  | 0.36348949  | 43.73124422  |
| C | -1.76330845 | -3.78111880 | 43.73124422  |
| C | -2.39289071 | 3.41762931  | 43.73124422  |
| C | 2.39023574  | 3.41522082  | 44.97399344  |
| C | -4.15278586 | 0.36239446  | 44.97399344  |
| C | 1.76255012  | -3.77761528 | 44.97399344  |
| C | -2.39023574 | -3.41522082 | 44.97399344  |
| C | 4.15278586  | -0.36239446 | 44.97399344  |
| C | -1.76255012 | 3.77761528  | 44.97399344  |
| C | 3.41522082  | 2.39023574  | -44.97399344 |
| C | 0.36239446  | -4.15278586 | -44.97399344 |
| C | -3.77761528 | 1.76255012  | -44.97399344 |
| C | -3.41522082 | -2.39023574 | -44.97399344 |
| C | -0.36239446 | 4.15278586  | -44.97399344 |
| C | 3.77761528  | -1.76255012 | -44.97399344 |
| C | -2.39023574 | -3.41522082 | -44.97399344 |
| C | 4.15278586  | -0.36239446 | -44.97399344 |
| C | -1.76255012 | 3.77761528  | -44.97399344 |
| C | 2.39023574  | 3.41522082  | -44.97399344 |
| C | -4.15278586 | 0.36239446  | -44.97399344 |
| C | 1.76255012  | -3.77761528 | -44.97399344 |
| C | -3.41522082 | -2.39023574 | 44.97399344  |
| C | -0.36239446 | 4.15278586  | 44.97399344  |
| C | 3.77761528  | -1.76255012 | 44.97399344  |
| C | 3.41522082  | 2.39023574  | 44.97399344  |
| C | 0.36239446  | -4.15278586 | 44.97399344  |
| C | -3.77761528 | 1.76255012  | 44.97399344  |
| C | 3.76385369  | 1.74931882  | 46.22597914  |
| C | -3.39688138 | 2.38493350  | 46.22597914  |
| C | -0.36697231 | -4.13425232 | 46.22597914  |
| C | -3.76385369 | -1.74931882 | 46.22597914  |
| C | 3.39688138  | -2.38493350 | 46.22597914  |
| C | 0.36697231  | 4.13425232  | 46.22597914  |
| C | 1.74931882  | 3.76385369  | -46.22597914 |
| C | 2.38493350  | -3.39688138 | -46.22597914 |
| C | -4.13425232 | -0.36697231 | -46.22597914 |
| C | -1.74931882 | -3.76385369 | -46.22597914 |
| C | -2.38493350 | 3.39688138  | -46.22597914 |
| C | 4.13425232  | 0.36697231  | -46.22597914 |
| C | -3.76385369 | -1.74931882 | -46.22597914 |
| C | 3.39688138  | -2.38493350 | -46.22597914 |
| C | 0.36697231  | 4.13425232  | -46.22597914 |
| C | 3.76385369  | 1.74931882  | -46.22597914 |
| C | -3.39688138 | 2.38493350  | -46.22597914 |
| C | -0.36697231 | -4.13425232 | -46.22597914 |
| C | -1.74931882 | -3.76385369 | 46.22597914  |
| C | -2.38493350 | 3.39688138  | 46.22597914  |
| C | 4.13425232  | 0.36697231  | 46.22597914  |
| C | 1.74931882  | 3.76385369  | 46.22597914  |
| C | 2.38493350  | -3.39688138 | 46.22597914  |
| C | -4.13425232 | -0.36697231 | 46.22597914  |
| C | 4.14676791  | -0.35978102 | 47.48751930  |

|   |             |             |              |
|---|-------------|-------------|--------------|
| C | -1.76180445 | 3.77109686  | 47.48751930  |
| C | -2.38496346 | -3.41131584 | 47.48751930  |
| C | -4.14676791 | 0.35978102  | 47.48751930  |
| C | 1.76180445  | -3.77109686 | 47.48751930  |
| C | 2.38496346  | 3.41131584  | 47.48751930  |
| C | -0.35978102 | 4.14676791  | -47.48751930 |
| C | 3.77109686  | -1.76180445 | -47.48751930 |
| C | -3.41131584 | -2.38496346 | -47.48751930 |
| C | 0.35978102  | -4.14676791 | -47.48751930 |
| C | -3.77109686 | 1.76180445  | -47.48751930 |
| C | 3.41131584  | 2.38496346  | -47.48751930 |
| C | -4.14676791 | 0.35978102  | -47.48751930 |
| C | 1.76180445  | -3.77109686 | -47.48751930 |
| C | 2.38496346  | 3.41131584  | -47.48751930 |
| C | 4.14676791  | -0.35978102 | -47.48751930 |
| C | -1.76180445 | 3.77109686  | -47.48751930 |
| C | -2.38496346 | -3.41131584 | -47.48751930 |
| C | 0.35978102  | -4.14676791 | 47.48751930  |
| C | -3.77109686 | 1.76180445  | 47.48751930  |
| C | 3.41131584  | 2.38496346  | 47.48751930  |
| C | -0.35978102 | 4.14676791  | 47.48751930  |
| C | 3.77109686  | -1.76180445 | 47.48751930  |
| C | -3.41131584 | -2.38496346 | 47.48751930  |
| C | 3.45470391  | -2.41415411 | 48.72737368  |
| C | 0.36336683  | 4.19893840  | 48.72737368  |
| C | -3.81807074 | -1.78478429 | 48.72737368  |
| C | -3.45470391 | 2.41415411  | 48.72737368  |
| C | -0.36336683 | -4.19893840 | 48.72737368  |
| C | 3.81807074  | 1.78478429  | 48.72737368  |
| C | -2.41415411 | 3.45470391  | -48.72737368 |
| C | 4.19893840  | 0.36336683  | -48.72737368 |
| C | -1.78478429 | -3.81807074 | -48.72737368 |
| C | 2.41415411  | -3.45470391 | -48.72737368 |
| C | -4.19893840 | -0.36336683 | -48.72737368 |
| C | 1.78478429  | 3.81807074  | -48.72737368 |
| C | -3.45470391 | 2.41415411  | -48.72737368 |
| C | -0.36336683 | -4.19893840 | -48.72737368 |
| C | 3.81807074  | 1.78478429  | -48.72737368 |
| C | 3.45470391  | -2.41415411 | -48.72737368 |
| C | 0.36336683  | 4.19893840  | -48.72737368 |
| C | -3.81807074 | -1.78478429 | -48.72737368 |
| C | 2.41415411  | -3.45470391 | 48.72737368  |
| C | -4.19893840 | -0.36336683 | 48.72737368  |
| C | 1.78478429  | 3.81807074  | 48.72737368  |
| C | -2.41415411 | 3.45470391  | 48.72737368  |
| C | 4.19893840  | 0.36336683  | 48.72737368  |
| C | -1.78478429 | -3.81807074 | 48.72737368  |
| C | 1.75973764  | -3.89198510 | 49.94128958  |
| C | 2.49068915  | 3.46997005  | 49.94128958  |
| C | -4.25042678 | 0.42201505  | 49.94128958  |
| C | -1.75973764 | 3.89198510  | 49.94128958  |
| C | -2.49068915 | -3.46997005 | 49.94128958  |
| C | 4.25042678  | -0.42201505 | 49.94128958  |
| C | -3.89198510 | 1.75973764  | -49.94128958 |
| C | 3.46997005  | 2.49068915  | -49.94128958 |
| C | 0.42201505  | -4.25042678 | -49.94128958 |
| C | 3.89198510  | -1.75973764 | -49.94128958 |
| C | -3.46997005 | -2.49068915 | -49.94128958 |
| C | -0.42201505 | 4.25042678  | -49.94128958 |
| C | -1.75973764 | 3.89198510  | -49.94128958 |
| C | -2.49068915 | -3.46997005 | -49.94128958 |
| C | 4.25042678  | -0.42201505 | -49.94128958 |
| C | 1.75973764  | -3.89198510 | -49.94128958 |
| C | 2.49068915  | 3.46997005  | -49.94128958 |
| C | -4.25042678 | 0.42201505  | -49.94128958 |
| C | 3.89198510  | -1.75973764 | 49.94128958  |
| C | -3.46997005 | -2.49068915 | 49.94128958  |
| C | -0.42201505 | 4.25042678  | 49.94128958  |
| C | -3.89198510 | 1.75973764  | 49.94128958  |
| C | 3.46997005  | 2.49068915  | 49.94128958  |

|   |             |             |              |
|---|-------------|-------------|--------------|
| C | 0.42201505  | -4.25042678 | 49.94128958  |
| H | -0.07736675 | -4.44770511 | 50.89858428  |
| H | 3.89050898  | 2.15685099  | 50.89858428  |
| H | -3.81314224 | 2.29085412  | 50.89858428  |
| H | 0.07736675  | 4.44770511  | 50.89858428  |
| H | -3.89050898 | -2.15685099 | 50.89858428  |
| H | 3.81314224  | -2.29085412 | 50.89858428  |
| H | -4.44770511 | -0.07736675 | -50.89858428 |
| H | 2.15685099  | 3.89050898  | -50.89858428 |
| H | 2.29085412  | -3.81314224 | -50.89858428 |
| H | 4.44770511  | 0.07736675  | -50.89858428 |
| H | -2.15685099 | -3.89050898 | -50.89858428 |
| H | -2.29085412 | 3.81314224  | -50.89858428 |
| H | 0.07736675  | 4.44770511  | -50.89858428 |
| H | -3.89050898 | -2.15685099 | -50.89858428 |
| H | 3.81314224  | -2.29085412 | -50.89858428 |
| H | -0.07736675 | -4.44770511 | -50.89858428 |
| H | 3.89050898  | 2.15685099  | -50.89858428 |
| H | -3.81314224 | 2.29085412  | -50.89858428 |
| H | 4.44770511  | 0.07736675  | 50.89858428  |
| H | -2.15685099 | -3.89050898 | 50.89858428  |
| H | -2.29085412 | 3.81314224  | 50.89858428  |
| H | -4.44770511 | -0.07736675 | 50.89858428  |
| H | 2.15685099  | 3.89050898  | 50.89858428  |
| H | 2.29085412  | -3.81314224 | 50.89858428  |

Nanotube (6,6) u41v0\_  
B3LYP/STO-3G Energy: -37059.619891

|   |             |             |             |
|---|-------------|-------------|-------------|
| C | 1.42803489  | 3.91693571  | 0.62600635  |
| C | -0.72175336 | 4.10618328  | -0.62600635 |
| C | -2.67814838 | 3.19518235  | 0.62600635  |
| C | -1.42803489 | -3.91693571 | 0.62600635  |
| C | 0.72175336  | -4.10618328 | -0.62600635 |
| C | 2.67814838  | -3.19518235 | 0.62600635  |
| C | -3.91693571 | 1.42803489  | -0.62600635 |
| C | -4.10618328 | -0.72175336 | 0.62600635  |
| C | -3.19518235 | -2.67814838 | -0.62600635 |
| C | 3.91693571  | -1.42803489 | -0.62600635 |
| C | 4.10618328  | 0.72175336  | 0.62600635  |
| C | 3.19518235  | 2.67814838  | -0.62600635 |
| C | 1.42803489  | -3.91693571 | 0.62600635  |
| C | -0.72175336 | -4.10618328 | -0.62600635 |
| C | -2.67814838 | -3.19518235 | 0.62600635  |
| C | -1.42803489 | 3.91693571  | 0.62600635  |
| C | 0.72175336  | 4.10618328  | -0.62600635 |
| C | 2.67814838  | 3.19518235  | 0.62600635  |
| C | -3.91693571 | -1.42803489 | -0.62600635 |
| C | -4.10618328 | 0.72175336  | 0.62600635  |
| C | -3.19518235 | 2.67814838  | -0.62600635 |
| C | 3.91693571  | 1.42803489  | -0.62600635 |
| C | 4.10618328  | -0.72175336 | 0.62600635  |
| C | 3.19518235  | -2.67814838 | -0.62600635 |
| C | 3.19677296  | 2.68201506  | 1.87387040  |
| C | 1.42747906  | 3.92107966  | -1.87387040 |
| C | -0.72430670 | 4.10949413  | 1.87387040  |
| C | -3.19677296 | -2.68201506 | 1.87387040  |
| C | -1.42747906 | -3.92107966 | -1.87387040 |
| C | 0.72430670  | -4.10949413 | 1.87387040  |
| C | -2.68201506 | 3.19677296  | -1.87387040 |
| C | -3.92107966 | 1.42747906  | 1.87387040  |
| C | -4.10949413 | -0.72430670 | -1.87387040 |
| C | 2.68201506  | -3.19677296 | -1.87387040 |
| C | 3.92107966  | -1.42747906 | 1.87387040  |
| C | 4.10949413  | 0.72430670  | -1.87387040 |
| C | 3.19677296  | -2.68201506 | 1.87387040  |
| C | 1.42747906  | -3.92107966 | -1.87387040 |
| C | -0.72430670 | -4.10949413 | 1.87387040  |

|   |             |             |             |
|---|-------------|-------------|-------------|
| C | -3.19677296 | 2.68201506  | 1.87387040  |
| C | -1.42747906 | 3.92107966  | -1.87387040 |
| C | 0.72430670  | 4.10949413  | 1.87387040  |
| C | -2.68201506 | -3.19677296 | -1.87387040 |
| C | -3.92107966 | -1.42747906 | 1.87387040  |
| C | -4.10949413 | 0.72430670  | -1.87387040 |
| C | 2.68201506  | 3.19677296  | -1.87387040 |
| C | 3.92107966  | 1.42747906  | 1.87387040  |
| C | 4.10949413  | -0.72430670 | -1.87387040 |
| C | 4.10676178  | 0.72209101  | 3.12116719  |
| C | 3.19551453  | 2.67873005  | -3.12116719 |
| C | 1.42803173  | 3.91760554  | 3.12116719  |
| C | -4.10676178 | -0.72209101 | 3.12116719  |
| C | -3.19551453 | -2.67873005 | -3.12116719 |
| C | -1.42803173 | -3.91760554 | 3.12116719  |
| C | -0.72209101 | 4.10676178  | -3.12116719 |
| C | -2.67873005 | 3.19551453  | 3.12116719  |
| C | -3.91760554 | 1.42803173  | -3.12116719 |
| C | 0.72209101  | -4.10676178 | -3.12116719 |
| C | 2.67873005  | -3.19551453 | 3.12116719  |
| C | 3.91760554  | -1.42803173 | -3.12116719 |
| C | 4.10676178  | -0.72209101 | 3.12116719  |
| C | 3.19551453  | -2.67873005 | -3.12116719 |
| C | 1.42803173  | -3.91760554 | 3.12116719  |
| C | -4.10676178 | 0.72209101  | 3.12116719  |
| C | -3.19551453 | 2.67873005  | -3.12116719 |
| C | -1.42803173 | 3.91760554  | 3.12116719  |
| C | -0.72209101 | -4.10676178 | -3.12116719 |
| C | -2.67873005 | -3.19551453 | 3.12116719  |
| C | -3.91760554 | -1.42803173 | -3.12116719 |
| C | 0.72209101  | 4.10676178  | -3.12116719 |
| C | 2.67873005  | 3.19551453  | 3.12116719  |
| C | 3.91760554  | 1.42803173  | -3.12116719 |
| C | 3.91655914  | -1.42818278 | 4.37313706  |
| C | 4.10593110  | 0.72143700  | -4.37313706 |
| C | 3.19512214  | 2.67774832  | 4.37313706  |
| C | -3.91655914 | 1.42818278  | 4.37313706  |
| C | -4.10593110 | -0.72143700 | -4.37313706 |
| C | -3.19512214 | -2.67774832 | 4.37313706  |
| C | 1.42818278  | 3.91655914  | -4.37313706 |
| C | -0.72143700 | 4.10593110  | 4.37313706  |
| C | -2.67774832 | 3.19512214  | -4.37313706 |
| C | -1.42818278 | -3.91655914 | -4.37313706 |
| C | 0.72143700  | -4.10593110 | 4.37313706  |
| C | 2.67774832  | -3.19512214 | -4.37313706 |
| C | 3.91655914  | 1.42818278  | 4.37313706  |
| C | 4.10593110  | -0.72143700 | -4.37313706 |
| C | 3.19512214  | -2.67774832 | 4.37313706  |
| C | -3.91655914 | -1.42818278 | 4.37313706  |
| C | -4.10593110 | 0.72143700  | -4.37313706 |
| C | -3.19512214 | 2.67774832  | 4.37313706  |
| C | 1.42818278  | -3.91655914 | -4.37313706 |
| C | -0.72143700 | -4.10593110 | 4.37313706  |
| C | -2.67774832 | -3.19512214 | -4.37313706 |
| C | -1.42818278 | 3.91655914  | -4.37313706 |
| C | 0.72143700  | 4.10593110  | 4.37313706  |
| C | 2.67774832  | 3.19512214  | -4.37313706 |
| C | 2.68190872  | -3.19674575 | 5.62165420  |
| C | 3.92097395  | -1.42750867 | -5.62165420 |
| C | 4.10941739  | 0.72422821  | 5.62165420  |
| C | -2.68190872 | 3.19674575  | 5.62165420  |
| C | -3.92097395 | 1.42750867  | -5.62165420 |
| C | -4.10941739 | -0.72422821 | 5.62165420  |
| C | 3.19674575  | 2.68190872  | -5.62165420 |
| C | 1.42750867  | 3.92097395  | 5.62165420  |
| C | -0.72422821 | 4.10941739  | -5.62165420 |
| C | -3.19674575 | -2.68190872 | -5.62165420 |
| C | -1.42750867 | -3.92097395 | 5.62165420  |
| C | 0.72422821  | -4.10941739 | -5.62165420 |
| C | 2.68190872  | 3.19674575  | 5.62165420  |

|   |             |             |             |
|---|-------------|-------------|-------------|
| C | 3.92097395  | 1.42750867  | -5.62165420 |
| C | 4.10941739  | -0.72422821 | 5.62165420  |
| C | -2.68190872 | -3.19674575 | 5.62165420  |
| C | -3.92097395 | -1.42750867 | -5.62165420 |
| C | -4.10941739 | 0.72422821  | 5.62165420  |
| C | 3.19674575  | -2.68190872 | -5.62165420 |
| C | 1.42750867  | -3.92097395 | 5.62165420  |
| C | -0.72422821 | -4.10941739 | -5.62165420 |
| C | -3.19674575 | 2.68190872  | -5.62165420 |
| C | -1.42750867 | 3.92097395  | 5.62165420  |
| C | 0.72422821  | 4.10941739  | -5.62165420 |
| C | 0.72251300  | -4.10726905 | 6.86844258  |
| C | 2.67934914  | -3.19574284 | -6.86844258 |
| C | 3.91825584  | -1.42791992 | 6.86844258  |
| C | -0.72251300 | 4.10726905  | 6.86844258  |
| C | -2.67934914 | 3.19574284  | -6.86844258 |
| C | -3.91825584 | 1.42791992  | 6.86844258  |
| C | 4.10726905  | 0.72251300  | -6.86844258 |
| C | 3.19574284  | 2.67934914  | 6.86844258  |
| C | 1.42791992  | 3.91825584  | -6.86844258 |
| C | -4.10726905 | -0.72251300 | -6.86844258 |
| C | -3.19574284 | -2.67934914 | 6.86844258  |
| C | -1.42791992 | -3.91825584 | -6.86844258 |
| C | 0.72251300  | 4.10726905  | 6.86844258  |
| C | 2.67934914  | 3.19574284  | -6.86844258 |
| C | 3.91825584  | 1.42791992  | 6.86844258  |
| C | -0.72251300 | -4.10726905 | 6.86844258  |
| C | -2.67934914 | -3.19574284 | -6.86844258 |
| C | -3.91825584 | -1.42791992 | 6.86844258  |
| C | 4.10726905  | -0.72251300 | -6.86844258 |
| C | 3.19574284  | -2.67934914 | 6.86844258  |
| C | 1.42791992  | -3.91825584 | -6.86844258 |
| C | -4.10726905 | 0.72251300  | -6.86844258 |
| C | -3.19574284 | 2.67934914  | 6.86844258  |
| C | -1.42791992 | 3.91825584  | -6.86844258 |
| C | -1.42826295 | -3.91617982 | 8.12011752  |
| C | 0.72117791  | -4.10564269 | -8.12011752 |
| C | 2.67737974  | -3.19500191 | 8.12011752  |
| C | 1.42826295  | 3.91617982  | 8.12011752  |
| C | -0.72117791 | 4.10564269  | -8.12011752 |
| C | -2.67737974 | 3.19500191  | 8.12011752  |
| C | 3.91617982  | -1.42826295 | -8.12011752 |
| C | 4.10564269  | 0.72117791  | 8.12011752  |
| C | 3.19500191  | 2.67737974  | -8.12011752 |
| C | -3.91617982 | 1.42826295  | -8.12011752 |
| C | -4.10564269 | -0.72117791 | 8.12011752  |
| C | -3.19500191 | -2.67737974 | -8.12011752 |
| C | -1.42826295 | 3.91617982  | 8.12011752  |
| C | 0.72117791  | 4.10564269  | -8.12011752 |
| C | 2.67737974  | 3.19500191  | 8.12011752  |
| C | 1.42826295  | -3.91617982 | 8.12011752  |
| C | -0.72117791 | -4.10564269 | -8.12011752 |
| C | -2.67737974 | -3.19500191 | 8.12011752  |
| C | 3.91617982  | 1.42826295  | -8.12011752 |
| C | 4.10564269  | -0.72117791 | 8.12011752  |
| C | 3.19500191  | -2.67737974 | -8.12011752 |
| C | -3.91617982 | -1.42826295 | -8.12011752 |
| C | -4.10564269 | 0.72117791  | 8.12011752  |
| C | -3.19500191 | 2.67737974  | -8.12011752 |
| C | -3.19666051 | -2.68165064 | 9.36930827  |
| C | -1.42756388 | -3.92070783 | -9.36930827 |
| C | 0.72404733  | -4.10921453 | 9.36930827  |
| C | 3.19666051  | 2.68165064  | 9.36930827  |
| C | 1.42756388  | 3.92070783  | -9.36930827 |
| C | -0.72404733 | 4.10921453  | 9.36930827  |
| C | 2.68165064  | -3.19666051 | -9.36930827 |
| C | 3.92070783  | -1.42756388 | 9.36930827  |
| C | 4.10921453  | 0.72404733  | -9.36930827 |
| C | -2.68165064 | 3.19666051  | -9.36930827 |
| C | -3.92070783 | 1.42756388  | 9.36930827  |



|   |             |             |              |
|---|-------------|-------------|--------------|
| C | -4.10921453 | -0.72404733 | -9.36930827  |
| C | -3.19666051 | 2.68165064  | 9.36930827   |
| C | -1.42756388 | 3.92070783  | -9.36930827  |
| C | 0.72404733  | 4.10921453  | 9.36930827   |
| C | 3.19666051  | -2.68165064 | 9.36930827   |
| C | 1.42756388  | -3.92070783 | -9.36930827  |
| C | -0.72404733 | -4.10921453 | 9.36930827   |
| C | 2.68165064  | 3.19666051  | -9.36930827  |
| C | 3.92070783  | 1.42756388  | 9.36930827   |
| C | 4.10921453  | -0.72404733 | -9.36930827  |
| C | -2.68165064 | -3.19666051 | -9.36930827  |
| C | -3.92070783 | -1.42756388 | 9.36930827   |
| C | -4.10921453 | 0.72404733  | -9.36930827  |
| C | -4.10782631 | -0.72295615 | 10.61570857  |
| C | -3.19600386 | -2.68001154 | -10.61570857 |
| C | -1.42781476 | -3.91896001 | 10.61570857  |
| C | 4.10782631  | 0.72295615  | 10.61570857  |
| C | 3.19600386  | 2.68001154  | -10.61570857 |
| C | 1.42781476  | 3.91896001  | 10.61570857  |
| C | 0.72295615  | -4.10782631 | -10.61570857 |
| C | 2.68001154  | -3.19600386 | 10.61570857  |
| C | 3.91896001  | -1.42781476 | -10.61570857 |
| C | -0.72295615 | 4.10782631  | -10.61570857 |
| C | -2.68001154 | 3.19600386  | 10.61570857  |
| C | -3.91896001 | 1.42781476  | -10.61570857 |
| C | -4.10782631 | 0.72295615  | 10.61570857  |
| C | -3.19600386 | 2.68001154  | -10.61570857 |
| C | -1.42781476 | 3.91896001  | 10.61570857  |
| C | 4.10782631  | -0.72295615 | 10.61570857  |
| C | 3.19600386  | -2.68001154 | -10.61570857 |
| C | 1.42781476  | -3.91896001 | 10.61570857  |
| C | 0.72295615  | 4.10782631  | -10.61570857 |
| C | 2.68001154  | 3.19600386  | 10.61570857  |
| C | 3.91896001  | 1.42781476  | -10.61570857 |
| C | -0.72295615 | -4.10782631 | -10.61570857 |
| C | -2.68001154 | -3.19600386 | 10.61570857  |
| C | -3.91896001 | -1.42781476 | -10.61570857 |
| C | -3.91592552 | 1.42831162  | 11.86700031  |
| C | -4.10544680 | -0.72100861 | -11.86700031 |
| C | -3.19491691 | -2.67713517 | 11.86700031  |
| C | 3.91592552  | -1.42831162 | 11.86700031  |
| C | 4.10544680  | 0.72100861  | -11.86700031 |
| C | 3.19491691  | 2.67713517  | 11.86700031  |
| C | -1.42831162 | -3.91592552 | -11.86700031 |
| C | 0.72100861  | -4.10544680 | 11.86700031  |
| C | 2.67713517  | -3.19491691 | -11.86700031 |
| C | 1.42831162  | 3.91592552  | -11.86700031 |
| C | -0.72100861 | 4.10544680  | 11.86700031  |
| C | -2.67713517 | 3.19491691  | -11.86700031 |
| C | -3.91592552 | -1.42831162 | 11.86700031  |
| C | -4.10544680 | 0.72100861  | -11.86700031 |
| C | -3.19491691 | 2.67713517  | 11.86700031  |
| C | 3.91592552  | 1.42831162  | 11.86700031  |
| C | 4.10544680  | -0.72100861 | -11.86700031 |
| C | 3.19491691  | -2.67713517 | 11.86700031  |
| C | -1.42831162 | 3.91592552  | -11.86700031 |
| C | 0.72100861  | 4.10544680  | 11.86700031  |
| C | 2.67713517  | 3.19491691  | -11.86700031 |
| C | 1.42831162  | -3.91592552 | -11.86700031 |
| C | -0.72100861 | -4.10544680 | 11.86700031  |
| C | -2.67713517 | -3.19491691 | -11.86700031 |
| C | -2.68127693 | 3.19653504  | 13.11692168  |
| C | -3.92032146 | 1.42764209  | -13.11692168 |
| C | -4.10891902 | -0.72378642 | 13.11692168  |
| C | 2.68127693  | -3.19653504 | 13.11692168  |
| C | 3.92032146  | -1.42764209 | -13.11692168 |
| C | 4.10891902  | 0.72378642  | 13.11692168  |
| C | -3.19653504 | -2.68127693 | -13.11692168 |
| C | -1.42764209 | -3.92032146 | 13.11692168  |
| C | 0.72378642  | -4.10891902 | -13.11692168 |

|   |             |             |              |
|---|-------------|-------------|--------------|
| C | 3.19653504  | 2.68127693  | -13.11692168 |
| C | 1.42764209  | 3.92032146  | 13.11692168  |
| C | -0.72378642 | 4.10891902  | -13.11692168 |
| C | -2.68127693 | -3.19653504 | 13.11692168  |
| C | -3.92032146 | -1.42764209 | -13.11692168 |
| C | -4.10891902 | 0.72378642  | 13.11692168  |
| C | 2.68127693  | 3.19653504  | 13.11692168  |
| C | 3.92032146  | 1.42764209  | -13.11692168 |
| C | 4.10891902  | -0.72378642 | 13.11692168  |
| C | -3.19653504 | 2.68127693  | -13.11692168 |
| C | -1.42764209 | 3.92032146  | 13.11692168  |
| C | 0.72378642  | 4.10891902  | -13.11692168 |
| C | 3.19653504  | -2.68127693 | -13.11692168 |
| C | 1.42764209  | -3.92032146 | 13.11692168  |
| C | -0.72378642 | -4.10891902 | -13.11692168 |
| C | -0.72337134 | 4.10833626  | 14.36311562  |
| C | -2.68062609 | 3.19623790  | -14.36311562 |
| C | -3.91960924 | 1.42771017  | 14.36311562  |
| C | 0.72337134  | -4.10833626 | 14.36311562  |
| C | 2.68062609  | -3.19623790 | -14.36311562 |
| C | 3.91960924  | -1.42771017 | 14.36311562  |
| C | -4.10833626 | -0.72337134 | -14.36311562 |
| C | -3.19623790 | -2.68062609 | 14.36311562  |
| C | -1.42771017 | -3.91960924 | -14.36311562 |
| C | 4.10833626  | 0.72337134  | -14.36311562 |
| C | 3.19623790  | 2.68062609  | 14.36311562  |
| C | 1.42771017  | 3.91960924  | -14.36311562 |
| C | -0.72337134 | -4.10833626 | 14.36311562  |
| C | -2.68062609 | -3.19623790 | -14.36311562 |
| C | -3.91960924 | -1.42771017 | 14.36311562  |
| C | 0.72337134  | 4.10833626  | 14.36311562  |
| C | 2.68062609  | 3.19623790  | -14.36311562 |
| C | 3.91960924  | 1.42771017  | 14.36311562  |
| C | -4.10833626 | 0.72337134  | -14.36311562 |
| C | -3.19623790 | 2.68062609  | 14.36311562  |
| C | -1.42771017 | 3.91960924  | -14.36311562 |
| C | 4.10833626  | -0.72337134 | -14.36311562 |
| C | 3.19623790  | -2.68062609 | 14.36311562  |
| C | 1.42771017  | -3.91960924 | -14.36311562 |
| C | 1.42832137  | 3.91577464  | 15.61391166  |
| C | -0.72092473 | 4.10532100  | -15.61391166 |
| C | -2.67699963 | 3.19484991  | 15.61391166  |
| C | -1.42832137 | -3.91577464 | 15.61391166  |
| C | 0.72092473  | -4.10532100 | -15.61391166 |
| C | 2.67699963  | -3.19484991 | 15.61391166  |
| C | -3.91577464 | 1.42832137  | -15.61391166 |
| C | -4.10532100 | -0.72092473 | 15.61391166  |
| C | -3.19484991 | -2.67699963 | -15.61391166 |
| C | 3.91577464  | -1.42832137 | -15.61391166 |
| C | 4.10532100  | 0.72092473  | 15.61391166  |
| C | 3.19484991  | 2.67699963  | -15.61391166 |
| C | 1.42832137  | -3.91577464 | 15.61391166  |
| C | -0.72092473 | -4.10532100 | -15.61391166 |
| C | -2.67699963 | -3.19484991 | 15.61391166  |
| C | -1.42832137 | 3.91577464  | 15.61391166  |
| C | 0.72092473  | 4.10532100  | -15.61391166 |
| C | 2.67699963  | 3.19484991  | 15.61391166  |
| C | -3.91577464 | -1.42832137 | -15.61391166 |
| C | -4.10532100 | 0.72092473  | 15.61391166  |
| C | -3.19484991 | 2.67699963  | -15.61391166 |
| C | 3.91577464  | 1.42832137  | -15.61391166 |
| C | 4.10532100  | -0.72092473 | 15.61391166  |
| C | 3.19484991  | -2.67699963 | -15.61391166 |
| C | 3.19630214  | 2.68077527  | 16.86454811  |
| C | 1.42769122  | 3.91977056  | -16.86454811 |
| C | -0.72346841 | 4.10846649  | 16.86454811  |
| C | -3.19630214 | -2.68077527 | 16.86454811  |
| C | -1.42769122 | -3.91977056 | -16.86454811 |
| C | 0.72346841  | -4.10846649 | 16.86454811  |
| C | -2.68077527 | 3.19630214  | -16.86454811 |

|   |             |             |              |
|---|-------------|-------------|--------------|
| C | -3.91977056 | 1.42769122  | 16.86454811  |
| C | -4.10846649 | -0.72346841 | -16.86454811 |
| C | 2.68077527  | -3.19630214 | -16.86454811 |
| C | 3.91977056  | -1.42769122 | 16.86454811  |
| C | 4.10846649  | 0.72346841  | -16.86454811 |
| C | 3.19630214  | -2.68077527 | 16.86454811  |
| C | 1.42769122  | -3.91977056 | -16.86454811 |
| C | -0.72346841 | -4.10846649 | 16.86454811  |
| C | -3.19630214 | 2.68077527  | 16.86454811  |
| C | -1.42769122 | 3.91977056  | -16.86454811 |
| C | 0.72346841  | 4.10846649  | 16.86454811  |
| C | -2.68077527 | -3.19630214 | -16.86454811 |
| C | -3.91977056 | -1.42769122 | 16.86454811  |
| C | -4.10846649 | 0.72346841  | -16.86454811 |
| C | 2.68077527  | 3.19630214  | -16.86454811 |
| C | 3.91977056  | 1.42769122  | 16.86454811  |
| C | 4.10846649  | -0.72346841 | -16.86454811 |
| C | 4.10880348  | 0.72378535  | 18.11071219  |
| C | 3.19643552  | 2.68121824  | -18.11071219 |
| C | 1.42758524  | 3.92022087  | 18.11071219  |
| C | -4.10880348 | -0.72378535 | 18.11071219  |
| C | -3.19643552 | -2.68121824 | -18.11071219 |
| C | -1.42758524 | -3.92022087 | 18.11071219  |
| C | -0.72378535 | 4.10880348  | -18.11071219 |
| C | -2.68121824 | 3.19643552  | 18.11071219  |
| C | -3.92022087 | 1.42758524  | -18.11071219 |
| C | 0.72378535  | -4.10880348 | -18.11071219 |
| C | 2.68121824  | -3.19643552 | 18.11071219  |
| C | 3.92022087  | -1.42758524 | -18.11071219 |
| C | 4.10880348  | -0.72378535 | 18.11071219  |
| C | 3.19643552  | -2.68121824 | -18.11071219 |
| C | 1.42758524  | -3.92022087 | 18.11071219  |
| C | -4.10880348 | 0.72378535  | 18.11071219  |
| C | -3.19643552 | 2.68121824  | -18.11071219 |
| C | -1.42758524 | 3.92022087  | 18.11071219  |
| C | -0.72378535 | -4.10880348 | -18.11071219 |
| C | -2.68121824 | -3.19643552 | 18.11071219  |
| C | -3.92022087 | -1.42758524 | -18.11071219 |
| C | 0.72378535  | 4.10880348  | -18.11071219 |
| C | 2.68121824  | 3.19643552  | 18.11071219  |
| C | 3.92022087  | 1.42758524  | -18.11071219 |
| C | 3.91579238  | -1.42831780 | 19.36090340  |
| C | 4.10533458  | 0.72093669  | -19.36090340 |
| C | 3.19485569  | 2.67701678  | 19.36090340  |
| C | -3.91579238 | 1.42831780  | 19.36090340  |
| C | -4.10533458 | -0.72093669 | -19.36090340 |
| C | -3.19485569 | -2.67701678 | 19.36090340  |
| C | 1.42831780  | 3.91579238  | -19.36090340 |
| C | -0.72093669 | 4.10533458  | 19.36090340  |
| C | -2.67701678 | 3.19485569  | -19.36090340 |
| C | -1.42831780 | -3.91579238 | -19.36090340 |
| C | 0.72093669  | -4.10533458 | 19.36090340  |
| C | 2.67701678  | -3.19485569 | -19.36090340 |
| C | 3.91579238  | 1.42831780  | 19.36090340  |
| C | 4.10533458  | -0.72093669 | -19.36090340 |
| C | 3.19485569  | -2.67701678 | 19.36090340  |
| C | -3.91579238 | -1.42831780 | 19.36090340  |
| C | -4.10533458 | 0.72093669  | -19.36090340 |
| C | -3.19485569 | 2.67701678  | 19.36090340  |
| C | 1.42831780  | -3.91579238 | -19.36090340 |
| C | -0.72093669 | -4.10533458 | 19.36090340  |
| C | -2.67701678 | -3.19485569 | -19.36090340 |
| C | -1.42831780 | 3.91579238  | -19.36090340 |
| C | 0.72093669  | 4.10533458  | 19.36090340  |
| C | 2.67701678  | 3.19485569  | -19.36090340 |
| C | 2.68015021  | -3.19607388 | 20.61222876  |
| C | 3.91911511  | -1.42780606 | -20.61222876 |
| C | 4.10795627  | 0.72304123  | 20.61222876  |
| C | -2.68015021 | 3.19607388  | 20.61222876  |
| C | -3.91911511 | 1.42780606  | -20.61222876 |

|   |             |             |              |
|---|-------------|-------------|--------------|
| C | -4.10795627 | -0.72304123 | 20.61222876  |
| C | 3.19607388  | 2.68015021  | -20.61222876 |
| C | 1.42780606  | 3.91911511  | 20.61222876  |
| C | -0.72304123 | 4.10795627  | -20.61222876 |
| C | -3.19607388 | -2.68015021 | -20.61222876 |
| C | -1.42780606 | -3.91911511 | 20.61222876  |
| C | 0.72304123  | -4.10795627 | -20.61222876 |
| C | 2.68015021  | 3.19607388  | 20.61222876  |
| C | 3.91911511  | 1.42780606  | -20.61222876 |
| C | 4.10795627  | -0.72304123 | 20.61222876  |
| C | -2.68015021 | -3.19607388 | 20.61222876  |
| C | -3.91911511 | -1.42780606 | -20.61222876 |
| C | -4.10795627 | 0.72304123  | 20.61222876  |
| C | 3.19607388  | -2.68015021 | -20.61222876 |
| C | 1.42780606  | -3.91911511 | 20.61222876  |
| C | -0.72304123 | -4.10795627 | -20.61222876 |
| C | -3.19607388 | 2.68015021  | -20.61222876 |
| C | -1.42780606 | 3.91911511  | 20.61222876  |
| C | 0.72304123  | 4.10795627  | -20.61222876 |
| C | 0.72412670  | -4.10917828 | 21.85855635  |
| C | 2.68170125  | -3.19658943 | -21.85855635 |
| C | 3.92071612  | -1.42747702 | 21.85855635  |
| C | -0.72412670 | 4.10917828  | 21.85855635  |
| C | -2.68170125 | 3.19658943  | -21.85855635 |
| C | -3.92071612 | 1.42747702  | 21.85855635  |
| C | 4.10917828  | 0.72412670  | -21.85855635 |
| C | 3.19658943  | 2.68170125  | 21.85855635  |
| C | 1.42747702  | 3.92071612  | -21.85855635 |
| C | -4.10917828 | -0.72412670 | -21.85855635 |
| C | -3.19658943 | -2.68170125 | 21.85855635  |
| C | -1.42747702 | -3.92071612 | -21.85855635 |
| C | 0.72412670  | 4.10917828  | 21.85855635  |
| C | 2.68170125  | 3.19658943  | -21.85855635 |
| C | 3.92071612  | 1.42747702  | 21.85855635  |
| C | -0.72412670 | -4.10917828 | 21.85855635  |
| C | -2.68170125 | -3.19658943 | -21.85855635 |
| C | -3.92071612 | -1.42747702 | 21.85855635  |
| C | 4.10917828  | -0.72412670 | -21.85855635 |
| C | 3.19658943  | -2.68170125 | 21.85855635  |
| C | 1.42747702  | -3.92071612 | -21.85855635 |
| C | -4.10917828 | 0.72412670  | -21.85855635 |
| C | -3.19658943 | 2.68170125  | 21.85855635  |
| C | -1.42747702 | 3.92071612  | -21.85855635 |
| C | -1.42823894 | -3.91585250 | 23.10809228  |
| C | 0.72103504  | -4.10534721 | -23.10809228 |
| C | 2.67710827  | -3.19481746 | 23.10809228  |
| C | 1.42823894  | 3.91585250  | 23.10809228  |
| C | -0.72103504 | 4.10534721  | -23.10809228 |
| C | -2.67710827 | 3.19481746  | 23.10809228  |
| C | 3.91585250  | -1.42823894 | -23.10809228 |
| C | 4.10534721  | 0.72103504  | 23.10809228  |
| C | 3.19481746  | 2.67710827  | -23.10809228 |
| C | -3.91585250 | 1.42823894  | -23.10809228 |
| C | -4.10534721 | -0.72103504 | 23.10809228  |
| C | -3.19481746 | -2.67710827 | -23.10809228 |
| C | -1.42823894 | 3.91585250  | 23.10809228  |
| C | 0.72103504  | 4.10534721  | -23.10809228 |
| C | 2.67710827  | 3.19481746  | 23.10809228  |
| C | 1.42823894  | -3.91585250 | 23.10809228  |
| C | -0.72103504 | -4.10534721 | -23.10809228 |
| C | -2.67710827 | -3.19481746 | 23.10809228  |
| C | 3.91585250  | 1.42823894  | -23.10809228 |
| C | 4.10534721  | -0.72103504 | 23.10809228  |
| C | 3.19481746  | -2.67710827 | -23.10809228 |
| C | -3.91585250 | -1.42823894 | -23.10809228 |
| C | -4.10534721 | 0.72103504  | 23.10809228  |
| C | -3.19481746 | 2.67710827  | -23.10809228 |
| C | -3.19567064 | -2.67941003 | 24.36007609  |
| C | -1.42782695 | -3.91827247 | -24.36007609 |
| C | 0.72260183  | -4.10723697 | 24.36007609  |

|   |             |             |              |
|---|-------------|-------------|--------------|
| C | 3.19567064  | 2.67941003  | 24.36007609  |
| C | 1.42782695  | 3.91827247  | -24.36007609 |
| C | -0.72260183 | 4.10723697  | 24.36007609  |
| C | 2.67941003  | -3.19567064 | -24.36007609 |
| C | 3.91827247  | -1.42782695 | 24.36007609  |
| C | 4.10723697  | 0.72260183  | -24.36007609 |
| C | -2.67941003 | 3.19567064  | -24.36007609 |
| C | -3.91827247 | 1.42782695  | 24.36007609  |
| C | -4.10723697 | -0.72260183 | -24.36007609 |
| C | -3.19567064 | 2.67941003  | 24.36007609  |
| C | -1.42782695 | 3.91827247  | -24.36007609 |
| C | 0.72260183  | 4.10723697  | 24.36007609  |
| C | 3.19567064  | -2.67941003 | 24.36007609  |
| C | 1.42782695  | -3.91827247 | -24.36007609 |
| C | -0.72260183 | -4.10723697 | 24.36007609  |
| C | 2.67941003  | 3.19567064  | -24.36007609 |
| C | 3.91827247  | 1.42782695  | 24.36007609  |
| C | 4.10723697  | -0.72260183 | -24.36007609 |
| C | -2.67941003 | -3.19567064 | -24.36007609 |
| C | -3.91827247 | -1.42782695 | 24.36007609  |
| C | -4.10723697 | 0.72260183  | -24.36007609 |
| C | -4.10941908 | -0.72442915 | 25.60675934  |
| C | -3.19664674 | -2.68208359 | -25.60675934 |
| C | -1.42733549 | -3.92107589 | 25.60675934  |
| C | 4.10941908  | 0.72442915  | 25.60675934  |
| C | 3.19664674  | 2.68208359  | -25.60675934 |
| C | 1.42733549  | 3.92107589  | 25.60675934  |
| C | 0.72442915  | -4.10941908 | -25.60675934 |
| C | 2.68208359  | -3.19664674 | 25.60675934  |
| C | 3.92107589  | -1.42733549 | -25.60675934 |
| C | -0.72442915 | 4.10941908  | -25.60675934 |
| C | -2.68208359 | 3.19664674  | 25.60675934  |
| C | -3.92107589 | 1.42733549  | -25.60675934 |
| C | -4.10941908 | 0.72442915  | 25.60675934  |
| C | -3.19664674 | 2.68208359  | -25.60675934 |
| C | -1.42733549 | 3.92107589  | 25.60675934  |
| C | 4.10941908  | -0.72442915 | 25.60675934  |
| C | 3.19664674  | -2.68208359 | -25.60675934 |
| C | 1.42733549  | -3.92107589 | 25.60675934  |
| C | 0.72442915  | 4.10941908  | -25.60675934 |
| C | 2.68208359  | 3.19664674  | 25.60675934  |
| C | 3.92107589  | 1.42733549  | -25.60675934 |
| C | -0.72442915 | -4.10941908 | -25.60675934 |
| C | -2.68208359 | -3.19664674 | 25.60675934  |
| C | -3.92107589 | -1.42733549 | -25.60675934 |
| C | -3.91606878 | 1.42813584  | 26.85558530  |
| C | -4.10548296 | -0.72123247 | -26.85558530 |
| C | -3.19483630 | -2.67734712 | 26.85558530  |
| C | 3.91606878  | -1.42813584 | 26.85558530  |
| C | 4.10548296  | 0.72123247  | -26.85558530 |
| C | 3.19483630  | 2.67734712  | 26.85558530  |
| C | -1.42813584 | -3.91606878 | -26.85558530 |
| C | 0.72123247  | -4.10548296 | 26.85558530  |
| C | 2.67734712  | -3.19483630 | -26.85558530 |
| C | 1.42813584  | 3.91606878  | -26.85558530 |
| C | -0.72123247 | 4.10548296  | 26.85558530  |
| C | -2.67734712 | 3.19483630  | -26.85558530 |
| C | -3.91606878 | -1.42813584 | 26.85558530  |
| C | -4.10548296 | 0.72123247  | -26.85558530 |
| C | -3.19483630 | 2.67734712  | 26.85558530  |
| C | 3.91606878  | 1.42813584  | 26.85558530  |
| C | 4.10548296  | -0.72123247 | -26.85558530 |
| C | 3.19483630  | -2.67734712 | 26.85558530  |
| C | -1.42813584 | 3.91606878  | -26.85558530 |
| C | 0.72123247  | 4.10548296  | 26.85558530  |
| C | 2.67734712  | 3.19483630  | -26.85558530 |
| C | 1.42813584  | -3.91606878 | -26.85558530 |
| C | -0.72123247 | -4.10548296 | 26.85558530  |
| C | -2.67734712 | -3.19483630 | -26.85558530 |
| C | -2.67868551 | 3.19542409  | 28.10810607  |

|   |             |             |              |
|---|-------------|-------------|--------------|
| C | -3.91752175 | 1.42797568  | -28.10810607 |
| C | -4.10666120 | -0.72209766 | 28.10810607  |
| C | 2.67868551  | -3.19542409 | 28.10810607  |
| C | 3.91752175  | -1.42797568 | -28.10810607 |
| C | 4.10666120  | 0.72209766  | 28.10810607  |
| C | -3.19542409 | -2.67868551 | -28.10810607 |
| C | -1.42797568 | -3.91752175 | 28.10810607  |
| C | 0.72209766  | -4.10666120 | -28.10810607 |
| C | 3.19542409  | 2.67868551  | -28.10810607 |
| C | 1.42797568  | 3.91752175  | 28.10810607  |
| C | -0.72209766 | 4.10666120  | -28.10810607 |
| C | -2.67868551 | -3.19542409 | 28.10810607  |
| C | -3.91752175 | -1.42797568 | -28.10810607 |
| C | -4.10666120 | 0.72209766  | 28.10810607  |
| C | 2.67868551  | 3.19542409  | 28.10810607  |
| C | 3.91752175  | 1.42797568  | -28.10810607 |
| C | 4.10666120  | -0.72209766 | 28.10810607  |
| C | -3.19542409 | 2.67868551  | -28.10810607 |
| C | -1.42797568 | 3.91752175  | 28.10810607  |
| C | 0.72209766  | 4.10666120  | -28.10810607 |
| C | 3.19542409  | -2.67868551 | -28.10810607 |
| C | 1.42797568  | -3.91752175 | 28.10810607  |
| C | -0.72209766 | -4.10666120 | -28.10810607 |
| C | -0.72468029 | 4.10967593  | 29.35531466  |
| C | -2.68242951 | 3.19674361  | -29.35531466 |
| C | -3.92142390 | 1.42724643  | 29.35531466  |
| C | 0.72468029  | -4.10967593 | 29.35531466  |
| C | 2.68242951  | -3.19674361 | -29.35531466 |
| C | 3.92142390  | -1.42724643 | 29.35531466  |
| C | -4.10967593 | -0.72468029 | -29.35531466 |
| C | -3.19674361 | -2.68242951 | 29.35531466  |
| C | -1.42724643 | -3.92142390 | -29.35531466 |
| C | 4.10967593  | 0.72468029  | -29.35531466 |
| C | 3.19674361  | 2.68242951  | 29.35531466  |
| C | 1.42724643  | 3.92142390  | -29.35531466 |
| C | -0.72468029 | -4.10967593 | 29.35531466  |
| C | -2.68242951 | -3.19674361 | -29.35531466 |
| C | -3.92142390 | -1.42724643 | 29.35531466  |
| C | 0.72468029  | 4.10967593  | 29.35531466  |
| C | 2.68242951  | 3.19674361  | -29.35531466 |
| C | 3.92142390  | 1.42724643  | 29.35531466  |
| C | -4.10967593 | 0.72468029  | -29.35531466 |
| C | -3.19674361 | 2.68242951  | 29.35531466  |
| C | -1.42724643 | 3.92142390  | -29.35531466 |
| C | 4.10967593  | -0.72468029 | -29.35531466 |
| C | 3.19674361  | -2.68242951 | 29.35531466  |
| C | 1.42724643  | -3.92142390 | -29.35531466 |
| C | 1.42801749  | 3.91649142  | 30.60335534  |
| C | -0.72154628 | 4.10578981  | -30.60335534 |
| C | -2.67777231 | 3.19494514  | 30.60335534  |
| C | -1.42801749 | -3.91649142 | 30.60335534  |
| C | 0.72154628  | -4.10578981 | -30.60335534 |
| C | 2.67777231  | -3.19494514 | 30.60335534  |
| C | -3.91649142 | 1.42801749  | -30.60335534 |
| C | -4.10578981 | -0.72154628 | 30.60335534  |
| C | -3.19494514 | -2.67777231 | -30.60335534 |
| C | 3.91649142  | -1.42801749 | -30.60335534 |
| C | 4.10578981  | 0.72154628  | 30.60335534  |
| C | 3.19494514  | 2.67777231  | -30.60335534 |
| C | 1.42801749  | -3.91649142 | 30.60335534  |
| C | -0.72154628 | -4.10578981 | -30.60335534 |
| C | -2.67777231 | -3.19494514 | 30.60335534  |
| C | -1.42801749 | 3.91649142  | 30.60335534  |
| C | 0.72154628  | 4.10578981  | -30.60335534 |
| C | 2.67777231  | 3.19494514  | 30.60335534  |
| C | -3.91649142 | -1.42801749 | -30.60335534 |
| C | -4.10578981 | 0.72154628  | 30.60335534  |
| C | -3.19494514 | 2.67777231  | -30.60335534 |
| C | 3.91649142  | 1.42801749  | -30.60335534 |
| C | 4.10578981  | -0.72154628 | 30.60335534  |

|   |             |             |              |
|---|-------------|-------------|--------------|
| C | 3.19494514  | -2.67777231 | -30.60335534 |
| C | 3.19494746  | 2.67779954  | 31.85634060  |
| C | 1.42800589  | 3.91651615  | -31.85634060 |
| C | -0.72156870 | 4.10580543  | 31.85634060  |
| C | -3.19494746 | -2.67779954 | 31.85634060  |
| C | -1.42800589 | -3.91651615 | -31.85634060 |
| C | 0.72156870  | -4.10580543 | 31.85634060  |
| C | -2.67779954 | 3.19494746  | -31.85634060 |
| C | -3.91651615 | 1.42800589  | 31.85634060  |
| C | -4.10580543 | -0.72156870 | -31.85634060 |
| C | 2.67779954  | -3.19494746 | -31.85634060 |
| C | 3.91651615  | -1.42800589 | 31.85634060  |
| C | 4.10580543  | 0.72156870  | -31.85634060 |
| C | 3.19494746  | -2.67779954 | 31.85634060  |
| C | 1.42800589  | -3.91651615 | -31.85634060 |
| C | -0.72156870 | -4.10580543 | 31.85634060  |
| C | -3.19494746 | 2.67779954  | 31.85634060  |
| C | -1.42800589 | 3.91651615  | -31.85634060 |
| C | 0.72156870  | 4.10580543  | 31.85634060  |
| C | -2.67779954 | -3.19494746 | -31.85634060 |
| C | -3.91651615 | -1.42800589 | 31.85634060  |
| C | -4.10580543 | 0.72156870  | -31.85634060 |
| C | 2.67779954  | 3.19494746  | -31.85634060 |
| C | 3.91651615  | 1.42800589  | 31.85634060  |
| C | 4.10580543  | -0.72156870 | -31.85634060 |
| C | 4.10956665  | 0.72484857  | 33.10428711  |
| C | 3.19656484  | 2.68252060  | -33.10428711 |
| C | 1.42704605  | 3.92141340  | 33.10428711  |
| C | -4.10956665 | -0.72484857 | 33.10428711  |
| C | -3.19656484 | -2.68252060 | -33.10428711 |
| C | -1.42704605 | -3.92141340 | 33.10428711  |
| C | -0.72484857 | 4.10956665  | -33.10428711 |
| C | -2.68252060 | 3.19656484  | 33.10428711  |
| C | -3.92141340 | 1.42704605  | -33.10428711 |
| C | 0.72484857  | -4.10956665 | -33.10428711 |
| C | 2.68252060  | -3.19656484 | 33.10428711  |
| C | 3.92141340  | -1.42704605 | -33.10428711 |
| C | 4.10956665  | -0.72484857 | 33.10428711  |
| C | 3.19656484  | -2.68252060 | -33.10428711 |
| C | 1.42704605  | -3.92141340 | 33.10428711  |
| C | -4.10956665 | 0.72484857  | 33.10428711  |
| C | -3.19656484 | 2.68252060  | -33.10428711 |
| C | -1.42704605 | 3.92141340  | 33.10428711  |
| C | -0.72484857 | -4.10956665 | -33.10428711 |
| C | -2.68252060 | -3.19656484 | 33.10428711  |
| C | -3.92141340 | -1.42704605 | -33.10428711 |
| C | 0.72484857  | 4.10956665  | -33.10428711 |
| C | 2.68252060  | 3.19656484  | 33.10428711  |
| C | 3.92141340  | 1.42704605  | -33.10428711 |
| C | 3.91680735  | -1.42775128 | 34.35146610  |
| C | 4.10593031  | 0.72193479  | -34.35146610 |
| C | 3.19487256  | 2.67817903  | 34.35146610  |
| C | -3.91680735 | 1.42775128  | 34.35146610  |
| C | -4.10593031 | -0.72193479 | -34.35146610 |
| C | -3.19487256 | -2.67817903 | 34.35146610  |
| C | 1.42775128  | 3.91680735  | -34.35146610 |
| C | -0.72193479 | 4.10593031  | 34.35146610  |
| C | -2.67817903 | 3.19487256  | -34.35146610 |
| C | -1.42775128 | -3.91680735 | -34.35146610 |
| C | 0.72193479  | -4.10593031 | 34.35146610  |
| C | 2.67817903  | -3.19487256 | -34.35146610 |
| C | 3.91680735  | 1.42775128  | 34.35146610  |
| C | 4.10593031  | -0.72193479 | -34.35146610 |
| C | 3.19487256  | -2.67817903 | 34.35146610  |
| C | -3.91680735 | -1.42775128 | 34.35146610  |
| C | -4.10593031 | 0.72193479  | -34.35146610 |
| C | -3.19487256 | 2.67817903  | 34.35146610  |
| C | 1.42775128  | -3.91680735 | -34.35146610 |
| C | -0.72193479 | -4.10593031 | 34.35146610  |
| C | -2.67817903 | -3.19487256 | -34.35146610 |

|   |             |             |              |
|---|-------------|-------------|--------------|
| C | -1.42775128 | 3.91680735  | -34.35146610 |
| C | 0.72193479  | 4.10593031  | 34.35146610  |
| C | 2.67817903  | 3.19487256  | -34.35146610 |
| C | 2.67677391  | -3.19443723 | 35.60474460  |
| C | 3.91537283  | -1.42807684 | -35.60474460 |
| C | 4.10485075  | 0.72093559  | 35.60474460  |
| C | -2.67677391 | 3.19443723  | 35.60474460  |
| C | -3.91537283 | 1.42807684  | -35.60474460 |
| C | -4.10485075 | -0.72093559 | 35.60474460  |
| C | 3.19443723  | 2.67677391  | -35.60474460 |
| C | 1.42807684  | 3.91537283  | 35.60474460  |
| C | -0.72093559 | 4.10485075  | -35.60474460 |
| C | -3.19443723 | -2.67677391 | -35.60474460 |
| C | -1.42807684 | -3.91537283 | 35.60474460  |
| C | 0.72093559  | -4.10485075 | -35.60474460 |
| C | 2.67677391  | 3.19443723  | 35.60474460  |
| C | 3.91537283  | 1.42807684  | -35.60474460 |
| C | 4.10485075  | -0.72093559 | 35.60474460  |
| C | -2.67677391 | -3.19443723 | 35.60474460  |
| C | -3.91537283 | -1.42807684 | -35.60474460 |
| C | -4.10485075 | 0.72093559  | 35.60474460  |
| C | 3.19443723  | -2.67677391 | -35.60474460 |
| C | 1.42807684  | -3.91537283 | 35.60474460  |
| C | -0.72093559 | -4.10485075 | -35.60474460 |
| C | -3.19443723 | 2.67677391  | -35.60474460 |
| C | -1.42807684 | 3.91537283  | 35.60474460  |
| C | 0.72093559  | 4.10485075  | -35.60474460 |
| C | 0.72490807  | -4.10951505 | 36.85359554  |
| C | 2.68254633  | -3.19649040 | -36.85359554 |
| C | 3.92139847  | -1.42696872 | 36.85359554  |
| C | -0.72490807 | 4.10951505  | 36.85359554  |
| C | -2.68254633 | 3.19649040  | -36.85359554 |
| C | -3.92139847 | 1.42696872  | 36.85359554  |
| C | 4.10951505  | 0.72490807  | -36.85359554 |
| C | 3.19649040  | 2.68254633  | 36.85359554  |
| C | 1.42696872  | 3.92139847  | -36.85359554 |
| C | -4.10951505 | -0.72490807 | -36.85359554 |
| C | -3.19649040 | -2.68254633 | 36.85359554  |
| C | -1.42696872 | -3.92139847 | -36.85359554 |
| C | 0.72490807  | 4.10951505  | 36.85359554  |
| C | 2.68254633  | 3.19649040  | -36.85359554 |
| C | 3.92139847  | 1.42696872  | 36.85359554  |
| C | -0.72490807 | -4.10951505 | 36.85359554  |
| C | -2.68254633 | -3.19649040 | -36.85359554 |
| C | -3.92139847 | -1.42696872 | 36.85359554  |
| C | 4.10951505  | -0.72490807 | -36.85359554 |
| C | 3.19649040  | -2.68254633 | 36.85359554  |
| C | 1.42696872  | -3.92139847 | -36.85359554 |
| C | -4.10951505 | 0.72490807  | -36.85359554 |
| C | -3.19649040 | 2.68254633  | 36.85359554  |
| C | -1.42696872 | 3.92139847  | -36.85359554 |
| C | -1.42751390 | -3.91740541 | 38.09977517  |
| C | 0.72243940  | -4.10632955 | -38.09977517 |
| C | 2.67881565  | -3.19496601 | 38.09977517  |
| C | 1.42751390  | 3.91740541  | 38.09977517  |
| C | -0.72243940 | 4.10632955  | -38.09977517 |
| C | -2.67881565 | 3.19496601  | 38.09977517  |
| C | 3.91740541  | -1.42751390 | -38.09977517 |
| C | 4.10632955  | 0.72243940  | 38.09977517  |
| C | 3.19496601  | 2.67881565  | -38.09977517 |
| C | -3.91740541 | 1.42751390  | -38.09977517 |
| C | -4.10632955 | -0.72243940 | 38.09977517  |
| C | -3.19496601 | -2.67881565 | -38.09977517 |
| C | -1.42751390 | 3.91740541  | 38.09977517  |
| C | 0.72243940  | 4.10632955  | -38.09977517 |
| C | 2.67881565  | 3.19496601  | 38.09977517  |
| C | 1.42751390  | -3.91740541 | 38.09977517  |
| C | -0.72243940 | -4.10632955 | -38.09977517 |
| C | -2.67881565 | -3.19496601 | 38.09977517  |
| C | 3.91740541  | 1.42751390  | -38.09977517 |



|   |             |             |              |
|---|-------------|-------------|--------------|
| C | 4.10632955  | -0.72243940 | 38.09977517  |
| C | 3.19496601  | -2.67881565 | -38.09977517 |
| C | -3.91740541 | -1.42751390 | -38.09977517 |
| C | -4.10632955 | 0.72243940  | 38.09977517  |
| C | -3.19496601 | 2.67881565  | -38.09977517 |
| C | -3.19378314 | -2.67553423 | 39.35321492  |
| C | -1.42813021 | -3.91397218 | -39.35321492 |
| C | 0.72018905  | -4.10366445 | 39.35321492  |
| C | 3.19378314  | 2.67553423  | 39.35321492  |
| C | 1.42813021  | 3.91397218  | -39.35321492 |
| C | -0.72018905 | 4.10366445  | 39.35321492  |
| C | 2.67553423  | -3.19378314 | -39.35321492 |
| C | 3.91397218  | -1.42813021 | 39.35321492  |
| C | 4.10366445  | 0.72018905  | -39.35321492 |
| C | -2.67553423 | 3.19378314  | -39.35321492 |
| C | -3.91397218 | 1.42813021  | 39.35321492  |
| C | -4.10366445 | -0.72018905 | -39.35321492 |
| C | -3.19378314 | 2.67553423  | 39.35321492  |
| C | -1.42813021 | 3.91397218  | -39.35321492 |
| C | 0.72018905  | 4.10366445  | 39.35321492  |
| C | 3.19378314  | -2.67553423 | 39.35321492  |
| C | 1.42813021  | -3.91397218 | -39.35321492 |
| C | -0.72018905 | -4.10366445 | 39.35321492  |
| C | 2.67553423  | 3.19378314  | -39.35321492 |
| C | 3.91397218  | 1.42813021  | 39.35321492  |
| C | 4.10366445  | -0.72018905 | -39.35321492 |
| C | -2.67553423 | -3.19378314 | -39.35321492 |
| C | -3.91397218 | -1.42813021 | 39.35321492  |
| C | -4.10366445 | 0.72018905  | -39.35321492 |
| C | -4.10940611 | -0.72494082 | 40.60337887  |
| C | -3.19637967 | -2.68252022 | -40.60337887 |
| C | -1.42688589 | -3.92132049 | 40.60337887  |
| C | 4.10940611  | 0.72494082  | 40.60337887  |
| C | 3.19637967  | 2.68252022  | -40.60337887 |
| C | 1.42688589  | 3.92132049  | 40.60337887  |
| C | 0.72494082  | -4.10940611 | -40.60337887 |
| C | 2.68252022  | -3.19637967 | 40.60337887  |
| C | 3.92132049  | -1.42688589 | -40.60337887 |
| C | -0.72494082 | 4.10940611  | -40.60337887 |
| C | -2.68252022 | 3.19637967  | 40.60337887  |
| C | -3.92132049 | 1.42688589  | -40.60337887 |
| C | -4.10940611 | 0.72494082  | 40.60337887  |
| C | -3.19637967 | 2.68252022  | -40.60337887 |
| C | -1.42688589 | 3.92132049  | 40.60337887  |
| C | 4.10940611  | -0.72494082 | 40.60337887  |
| C | 3.19637967  | -2.68252022 | -40.60337887 |
| C | 1.42688589  | -3.92132049 | 40.60337887  |
| C | 0.72494082  | 4.10940611  | -40.60337887 |
| C | 2.68252022  | 3.19637967  | 40.60337887  |
| C | 3.92132049  | 1.42688589  | -40.60337887 |
| C | -0.72494082 | -4.10940611 | -40.60337887 |
| C | -2.68252022 | -3.19637967 | 40.60337887  |
| C | -3.92132049 | -1.42688589 | -40.60337887 |
| C | -3.91911905 | 1.42747377  | 41.84834203  |
| C | -4.10779355 | -0.72333098 | -41.84834203 |
| C | -3.19578807 | -2.68031978 | 41.84834203  |
| C | 3.91911905  | -1.42747377 | 41.84834203  |
| C | 4.10779355  | 0.72333098  | -41.84834203 |
| C | 3.19578807  | 2.68031978  | 41.84834203  |
| C | -1.42747377 | -3.91911905 | -41.84834203 |
| C | 0.72333098  | -4.10779355 | 41.84834203  |
| C | 2.68031978  | -3.19578807 | -41.84834203 |
| C | 1.42747377  | 3.91911905  | -41.84834203 |
| C | -0.72333098 | 4.10779355  | 41.84834203  |
| C | -2.68031978 | 3.19578807  | -41.84834203 |
| C | -3.91911905 | -1.42747377 | 41.84834203  |
| C | -4.10779355 | 0.72333098  | -41.84834203 |
| C | -3.19578807 | 2.68031978  | 41.84834203  |
| C | 3.91911905  | 1.42747377  | 41.84834203  |
| C | 4.10779355  | -0.72333098 | -41.84834203 |

|   |             |             |              |
|---|-------------|-------------|--------------|
| C | 3.19578807  | -2.68031978 | 41.84834203  |
| C | -1.42747377 | 3.91911905  | -41.84834203 |
| C | 0.72333098  | 4.10779355  | 41.84834203  |
| C | 2.68031978  | 3.19578807  | -41.84834203 |
| C | 1.42747377  | -3.91911905 | -41.84834203 |
| C | -0.72333098 | -4.10779355 | 41.84834203  |
| C | -2.68031978 | -3.19578807 | -41.84834203 |
| C | -2.67463933 | 3.19414006  | 43.10151065  |
| C | -3.91337563 | 1.42888677  | -43.10151065 |
| C | -4.10352610 | -0.71923557 | 43.10151065  |
| C | 2.67463933  | -3.19414006 | 43.10151065  |
| C | 3.91337563  | -1.42888677 | -43.10151065 |
| C | 4.10352610  | 0.71923557  | 43.10151065  |
| C | -3.19414006 | -2.67463933 | -43.10151065 |
| C | -1.42888677 | -3.91337563 | 43.10151065  |
| C | 0.71923557  | -4.10352610 | -43.10151065 |
| C | 3.19414006  | 2.67463933  | -43.10151065 |
| C | 1.42888677  | 3.91337563  | 43.10151065  |
| C | -0.71923557 | 4.10352610  | -43.10151065 |
| C | -2.67463933 | -3.19414006 | 43.10151065  |
| C | -3.91337563 | -1.42888677 | -43.10151065 |
| C | -4.10352610 | 0.71923557  | 43.10151065  |
| C | 2.67463933  | 3.19414006  | 43.10151065  |
| C | 3.91337563  | 1.42888677  | -43.10151065 |
| C | 4.10352610  | -0.71923557 | 43.10151065  |
| C | -3.19414006 | 2.67463933  | -43.10151065 |
| C | -1.42888677 | 3.91337563  | 43.10151065  |
| C | 0.71923557  | 4.10352610  | -43.10151065 |
| C | 3.19414006  | -2.67463933 | -43.10151065 |
| C | 1.42888677  | -3.91337563 | 43.10151065  |
| C | -0.71923557 | -4.10352610 | -43.10151065 |
| C | -0.72482742 | 4.10901861  | 44.35374138  |
| C | -2.68222827 | 3.19610079  | -44.35374138 |
| C | -3.92092821 | 1.42679034  | 44.35374138  |
| C | 0.72482742  | -4.10901861 | 44.35374138  |
| C | 2.68222827  | -3.19610079 | -44.35374138 |
| C | 3.92092821  | -1.42679034 | 44.35374138  |
| C | -4.10901861 | -0.72482742 | -44.35374138 |
| C | -3.19610079 | -2.68222827 | 44.35374138  |
| C | -1.42679034 | -3.92092821 | -44.35374138 |
| C | 4.10901861  | 0.72482742  | -44.35374138 |
| C | 3.19610079  | 2.68222827  | 44.35374138  |
| C | 1.42679034  | 3.92092821  | -44.35374138 |
| C | -0.72482742 | -4.10901861 | 44.35374138  |
| C | -2.68222827 | -3.19610079 | -44.35374138 |
| C | -3.92092821 | -1.42679034 | 44.35374138  |
| C | 0.72482742  | 4.10901861  | 44.35374138  |
| C | 2.68222827  | 3.19610079  | -44.35374138 |
| C | 3.92092821  | 1.42679034  | 44.35374138  |
| C | -4.10901861 | 0.72482742  | -44.35374138 |
| C | -3.19610079 | 2.68222827  | 44.35374138  |
| C | -1.42679034 | 3.92092821  | -44.35374138 |
| C | 4.10901861  | -0.72482742 | -44.35374138 |
| C | 3.19610079  | -2.68222827 | 44.35374138  |
| C | 1.42679034  | -3.92092821 | -44.35374138 |
| C | 1.42506950  | 3.91646501  | 45.59658616  |
| C | -0.72408611 | 4.10429294  | -45.59658616 |
| C | -2.67922344 | 3.19237890  | 45.59658616  |
| C | -1.42506950 | -3.91646501 | 45.59658616  |
| C | 0.72408611  | -4.10429294 | -45.59658616 |
| C | 2.67922344  | -3.19237890 | 45.59658616  |
| C | -3.91646501 | 1.42506950  | -45.59658616 |
| C | -4.10429294 | -0.72408611 | 45.59658616  |
| C | -3.19237890 | -2.67922344 | -45.59658616 |
| C | 3.91646501  | -1.42506950 | -45.59658616 |
| C | 4.10429294  | 0.72408611  | 45.59658616  |
| C | 3.19237890  | 2.67922344  | -45.59658616 |
| C | 1.42506950  | -3.91646501 | 45.59658616  |
| C | -0.72408611 | -4.10429294 | -45.59658616 |
| C | -2.67922344 | -3.19237890 | 45.59658616  |

|   |             |             |              |
|---|-------------|-------------|--------------|
| C | -1.42506950 | 3.91646501  | 45.59658616  |
| C | 0.72408611  | 4.10429294  | -45.59658616 |
| C | 2.67922344  | 3.19237890  | 45.59658616  |
| C | -3.91646501 | -1.42506950 | -45.59658616 |
| C | -4.10429294 | 0.72408611  | 45.59658616  |
| C | -3.19237890 | 2.67922344  | -45.59658616 |
| C | 3.91646501  | 1.42506950  | -45.59658616 |
| C | 4.10429294  | -0.72408611 | 45.59658616  |
| C | 3.19237890  | -2.67922344 | -45.59658616 |
| C | 3.18280196  | 2.66355656  | 46.84934212  |
| C | 1.42460907  | 3.89810863  | -46.84934212 |
| C | -0.71530667 | 4.08816563  | 46.84934212  |
| C | -3.18280196 | -2.66355656 | 46.84934212  |
| C | -1.42460907 | -3.89810863 | -46.84934212 |
| C | 0.71530667  | -4.08816563 | 46.84934212  |
| C | -2.66355656 | 3.18280196  | -46.84934212 |
| C | -3.89810863 | 1.42460907  | 46.84934212  |
| C | -4.08816563 | -0.71530667 | -46.84934212 |
| C | 2.66355656  | -3.18280196 | -46.84934212 |
| C | 3.89810863  | -1.42460907 | 46.84934212  |
| C | 4.08816563  | 0.71530667  | -46.84934212 |
| C | 3.18280196  | -2.66355656 | 46.84934212  |
| C | 1.42460907  | -3.89810863 | -46.84934212 |
| C | -0.71530667 | -4.08816563 | 46.84934212  |
| C | -3.18280196 | 2.66355656  | 46.84934212  |
| C | -1.42460907 | 3.89810863  | -46.84934212 |
| C | 0.71530667  | 4.08816563  | 46.84934212  |
| C | -2.66355656 | -3.18280196 | -46.84934212 |
| C | -3.89810863 | -1.42460907 | 46.84934212  |
| C | -4.08816563 | 0.71530667  | -46.84934212 |
| C | 2.66355656  | 3.18280196  | -46.84934212 |
| C | 3.89810863  | 1.42460907  | 46.84934212  |
| C | 4.08816563  | -0.71530667 | -46.84934212 |
| C | 4.09895272  | 0.72592641  | 48.11020102  |
| C | 3.18683398  | 2.67814707  | -48.11020102 |
| C | 1.42080565  | 3.91276039  | 48.11020102  |
| C | -4.09895272 | -0.72592641 | 48.11020102  |
| C | -3.18683398 | -2.67814707 | -48.11020102 |
| C | -1.42080565 | -3.91276039 | 48.11020102  |
| C | -0.72592641 | 4.09895272  | -48.11020102 |
| C | -2.67814707 | 3.18683398  | 48.11020102  |
| C | -3.91276039 | 1.42080565  | -48.11020102 |
| C | 0.72592641  | -4.09895272 | -48.11020102 |
| C | 2.67814707  | -3.18683398 | 48.11020102  |
| C | 3.91276039  | -1.42080565 | -48.11020102 |
| C | 4.09895272  | -0.72592641 | 48.11020102  |
| C | 3.18683398  | -2.67814707 | -48.11020102 |
| C | 1.42080565  | -3.91276039 | 48.11020102  |
| C | -4.09895272 | 0.72592641  | 48.11020102  |
| C | -3.18683398 | 2.67814707  | -48.11020102 |
| C | -1.42080565 | 3.91276039  | 48.11020102  |
| C | -0.72592641 | -4.09895272 | -48.11020102 |
| C | -2.67814707 | -3.18683398 | 48.11020102  |
| C | -3.91276039 | -1.42080565 | -48.11020102 |
| C | 0.72592641  | 4.09895272  | -48.11020102 |
| C | 2.67814707  | 3.18683398  | 48.11020102  |
| C | 3.91276039  | 1.42080565  | -48.11020102 |
| C | 3.96088961  | -1.43794855 | 49.35003691  |
| C | 4.14920530  | 0.73514483  | -49.35003691 |
| C | 3.22574478  | 2.71125674  | 49.35003691  |
| C | -3.96088961 | 1.43794855  | 49.35003691  |
| C | -4.14920530 | -0.73514483 | -49.35003691 |
| C | -3.22574478 | -2.71125674 | 49.35003691  |
| C | 1.43794855  | 3.96088961  | -49.35003691 |
| C | -0.73514483 | 4.14920530  | 49.35003691  |
| C | -2.71125674 | 3.22574478  | -49.35003691 |
| C | -1.43794855 | -3.96088961 | -49.35003691 |
| C | 0.73514483  | -4.14920530 | 49.35003691  |
| C | 2.71125674  | -3.22574478 | -49.35003691 |
| C | 3.96088961  | 1.43794855  | 49.35003691  |

|   |             |             |              |
|---|-------------|-------------|--------------|
| C | 4.14920530  | -0.73514483 | -49.35003691 |
| C | 3.22574478  | -2.71125674 | 49.35003691  |
| C | -3.96088961 | -1.43794855 | 49.35003691  |
| C | -4.14920530 | 0.73514483  | -49.35003691 |
| C | -3.22574478 | 2.71125674  | 49.35003691  |
| C | 1.43794855  | -3.96088961 | -49.35003691 |
| C | -0.73514483 | -4.14920530 | 49.35003691  |
| C | -2.71125674 | -3.22574478 | -49.35003691 |
| C | -1.43794855 | 3.96088961  | -49.35003691 |
| C | 0.73514483  | 4.14920530  | 49.35003691  |
| C | 2.71125674  | 3.22574478  | -49.35003691 |
| C | 2.70659172  | -3.30378736 | 50.56467682  |
| C | 3.99587087  | -1.50786793 | -50.56467682 |
| C | 4.21445965  | 0.69208351  | 50.56467682  |
| C | -2.70659172 | 3.30378736  | 50.56467682  |
| C | -3.99587087 | 1.50786793  | -50.56467682 |
| C | -4.21445965 | -0.69208351 | 50.56467682  |
| C | 3.30378736  | 2.70659172  | -50.56467682 |
| C | 1.50786793  | 3.99587087  | 50.56467682  |
| C | -0.69208351 | 4.21445965  | -50.56467682 |
| C | -3.30378736 | -2.70659172 | -50.56467682 |
| C | -1.50786793 | -3.99587087 | 50.56467682  |
| C | 0.69208351  | -4.21445965 | -50.56467682 |
| C | 2.70659172  | 3.30378736  | 50.56467682  |
| C | 3.99587087  | 1.50786793  | -50.56467682 |
| C | 4.21445965  | -0.69208351 | 50.56467682  |
| C | -2.70659172 | -3.30378736 | 50.56467682  |
| C | -3.99587087 | -1.50786793 | -50.56467682 |
| C | -4.21445965 | 0.69208351  | 50.56467682  |
| C | 3.30378736  | -2.70659172 | -50.56467682 |
| C | 1.50786793  | -3.99587087 | 50.56467682  |
| C | -0.69208351 | -4.21445965 | -50.56467682 |
| C | -3.30378736 | 2.70659172  | -50.56467682 |
| C | -1.50786793 | 3.99587087  | 50.56467682  |
| C | 0.69208351  | 4.21445965  | -50.56467682 |
| H | 1.07655028  | -4.31650794 | 51.52162614  |
| H | 3.09057386  | -3.19993039 | -51.52162614 |
| H | 4.27648067  | -1.22593408 | 51.52162614  |
| H | -1.07655028 | 4.31650794  | 51.52162614  |
| H | -3.09057386 | 3.19993039  | -51.52162614 |
| H | -4.27648067 | 1.22593408  | 51.52162614  |
| H | 4.31650794  | 1.07655028  | -51.52162614 |
| H | 3.19993039  | 3.09057386  | 51.52162614  |
| H | 1.22593408  | 4.27648067  | -51.52162614 |
| H | -4.31650794 | -1.07655028 | -51.52162614 |
| H | -3.19993039 | -3.09057386 | 51.52162614  |
| H | -1.22593408 | -4.27648067 | -51.52162614 |
| H | 1.07655028  | 4.31650794  | 51.52162614  |
| H | 3.09057386  | 3.19993039  | -51.52162614 |
| H | 4.27648067  | 1.22593408  | 51.52162614  |
| H | -1.07655028 | -4.31650794 | 51.52162614  |
| H | -3.09057386 | -3.19993039 | -51.52162614 |
| H | -4.27648067 | -1.22593408 | 51.52162614  |
| H | 4.31650794  | -1.07655028 | -51.52162614 |
| H | 3.19993039  | -3.09057386 | 51.52162614  |
| H | 1.22593408  | -4.27648067 | -51.52162614 |
| H | -4.31650794 | 1.07655028  | -51.52162614 |
| H | -3.19993039 | 3.09057386  | 51.52162614  |
| H | -1.22593408 | 4.27648067  | -51.52162614 |

Nanotube (6,6) u41v6\_  
B3LYP/STO-3G Energy: -37511.397228

|   |             |             |             |
|---|-------------|-------------|-------------|
| H | 2.29168838  | 3.81156019  | 52.18990409 |
| H | -4.44675214 | 0.07888026  | 52.18990409 |
| H | 2.15506376  | -3.89044045 | 52.18990409 |
| H | -2.29168838 | -3.81156019 | 52.18990409 |
| H | 4.44675214  | -0.07888026 | 52.18990409 |

|   |             |             |              |
|---|-------------|-------------|--------------|
| H | -2.15506376 | 3.89044045  | 52.18990409  |
| H | 3.81156019  | 2.29168838  | -52.18990409 |
| H | 0.07888026  | -4.44675214 | -52.18990409 |
| H | -3.89044045 | 2.15506376  | -52.18990409 |
| H | -3.81156019 | -2.29168838 | -52.18990409 |
| H | -0.07888026 | 4.44675214  | -52.18990409 |
| H | 3.89044045  | -2.15506376 | -52.18990409 |
| H | -2.29168838 | -3.81156019 | -52.18990409 |
| H | 4.44675214  | -0.07888026 | -52.18990409 |
| H | -2.15506376 | 3.89044045  | -52.18990409 |
| H | 2.29168838  | 3.81156019  | -52.18990409 |
| H | -4.44675214 | 0.07888026  | -52.18990409 |
| H | 2.15506376  | -3.89044045 | -52.18990409 |
| H | -3.81156019 | -2.29168838 | 52.18990409  |
| H | -0.07888026 | 4.44675214  | 52.18990409  |
| H | 3.89044045  | -2.15506376 | 52.18990409  |
| H | 3.81156019  | 2.29168838  | 52.18990409  |
| H | 0.07888026  | -4.44675214 | 52.18990409  |
| H | -3.89044045 | 2.15506376  | 52.18990409  |
| C | 1.75776518  | 3.88788248  | 51.23405794  |
| C | -4.24588758 | -0.42167194 | 51.23405794  |
| C | 2.48812240  | -3.46621054 | 51.23405794  |
| C | -1.75776518 | -3.88788248 | 51.23405794  |
| C | 4.24588758  | 0.42167194  | 51.23405794  |
| C | -2.48812240 | 3.46621054  | 51.23405794  |
| C | 3.88788248  | 1.75776518  | -51.23405794 |
| C | -0.42167194 | -4.24588758 | -51.23405794 |
| C | -3.46621054 | 2.48812240  | -51.23405794 |
| C | -3.88788248 | -1.75776518 | -51.23405794 |
| C | 0.42167194  | 4.24588758  | -51.23405794 |
| C | 3.46621054  | -2.48812240 | -51.23405794 |
| C | -1.75776518 | -3.88788248 | -51.23405794 |
| C | 4.24588758  | 0.42167194  | -51.23405794 |
| C | -2.48812240 | 3.46621054  | -51.23405794 |
| C | 1.75776518  | 3.88788248  | -51.23405794 |
| C | -4.24588758 | -0.42167194 | -51.23405794 |
| C | 2.48812240  | -3.46621054 | -51.23405794 |
| C | -3.88788248 | -1.75776518 | 51.23405794  |
| C | 0.42167194  | 4.24588758  | 51.23405794  |
| C | 3.46621054  | -2.48812240 | 51.23405794  |
| C | 3.88788248  | 1.75776518  | 51.23405794  |
| C | -0.42167194 | -4.24588758 | 51.23405794  |
| C | -3.46621054 | 2.48812240  | 51.23405794  |
| C | -0.36377572 | 4.19431562  | 50.01780237  |
| C | -3.45049602 | -2.41219683 | 50.01780237  |
| C | 3.81427174  | -1.78211879 | 50.01780237  |
| C | 0.36377572  | -4.19431562 | 50.01780237  |
| C | 3.45049602  | 2.41219683  | 50.01780237  |
| C | -3.81427174 | 1.78211879  | 50.01780237  |
| C | 4.19431562  | -0.36377572 | -50.01780237 |
| C | -2.41219683 | -3.45049602 | -50.01780237 |
| C | -1.78211879 | 3.81427174  | -50.01780237 |
| C | -4.19431562 | 0.36377572  | -50.01780237 |
| C | 2.41219683  | 3.45049602  | -50.01780237 |
| C | 1.78211879  | -3.81427174 | -50.01780237 |
| C | 0.36377572  | -4.19431562 | -50.01780237 |
| C | 3.45049602  | 2.41219683  | -50.01780237 |
| C | -3.81427174 | 1.78211879  | -50.01780237 |
| C | -0.36377572 | 4.19431562  | -50.01780237 |
| C | -3.45049602 | -2.41219683 | -50.01780237 |
| C | 3.81427174  | -1.78211879 | -50.01780237 |
| C | -4.19431562 | 0.36377572  | 50.01780237  |
| C | 2.41219683  | 3.45049602  | 50.01780237  |
| C | 1.78211879  | -3.81427174 | 50.01780237  |
| C | 4.19431562  | -0.36377572 | 50.01780237  |
| C | -2.41219683 | -3.45049602 | 50.01780237  |
| C | -1.78211879 | 3.81427174  | 50.01780237  |
| C | -2.38389296 | 3.41056778  | 48.77750285  |
| C | -1.76169186 | -3.76979576 | 48.77750285  |
| C | 4.14558482  | 0.35922798  | 48.77750285  |

|   |             |             |              |
|---|-------------|-------------|--------------|
| C | 2.38389296  | -3.41056778 | 48.77750285  |
| C | 1.76169186  | 3.76979576  | 48.77750285  |
| C | -4.14558482 | -0.35922798 | 48.77750285  |
| C | 3.41056778  | -2.38389296 | -48.77750285 |
| C | -3.76979576 | -1.76169186 | -48.77750285 |
| C | 0.35922798  | 4.14558482  | -48.77750285 |
| C | -3.41056778 | 2.38389296  | -48.77750285 |
| C | 3.76979576  | 1.76169186  | -48.77750285 |
| C | -0.35922798 | -4.14558482 | -48.77750285 |
| C | 2.38389296  | -3.41056778 | -48.77750285 |
| C | 1.76169186  | 3.76979576  | -48.77750285 |
| C | -4.14558482 | -0.35922798 | -48.77750285 |
| C | -2.38389296 | 3.41056778  | -48.77750285 |
| C | -1.76169186 | -3.76979576 | -48.77750285 |
| C | 4.14558482  | 0.35922798  | -48.77750285 |
| C | -3.41056778 | 2.38389296  | 48.77750285  |
| C | 3.76979576  | 1.76169186  | 48.77750285  |
| C | -0.35922798 | -4.14558482 | 48.77750285  |
| C | 3.41056778  | -2.38389296 | 48.77750285  |
| C | -3.76979576 | -1.76169186 | 48.77750285  |
| C | 0.35922798  | 4.14558482  | 48.77750285  |
| C | -3.76279311 | 1.74856110  | 47.51667938  |
| C | 0.36709822  | -4.13295497 | 47.51667938  |
| C | 3.39569489  | 2.38439387  | 47.51667938  |
| C | 3.76279311  | -1.74856110 | 47.51667938  |
| C | -0.36709822 | 4.13295497  | 47.51667938  |
| C | -3.39569489 | -2.38439387 | 47.51667938  |
| C | 1.74856110  | -3.76279311 | -47.51667938 |
| C | -4.13295497 | 0.36709822  | -47.51667938 |
| C | 2.38439387  | 3.39569489  | -47.51667938 |
| C | -1.74856110 | 3.76279311  | -47.51667938 |
| C | 4.13295497  | -0.36709822 | -47.51667938 |
| C | -2.38439387 | -3.39569489 | -47.51667938 |
| C | 3.76279311  | -1.74856110 | -47.51667938 |
| C | -0.36709822 | 4.13295497  | -47.51667938 |
| C | -3.39569489 | -2.38439387 | -47.51667938 |
| C | -3.76279311 | 1.74856110  | -47.51667938 |
| C | 0.36709822  | -4.13295497 | -47.51667938 |
| C | 3.39569489  | 2.38439387  | -47.51667938 |
| C | -1.74856110 | 3.76279311  | 47.51667938  |
| C | 4.13295497  | -0.36709822 | 47.51667938  |
| C | -2.38439387 | -3.39569489 | 47.51667938  |
| C | 1.74856110  | -3.76279311 | 47.51667938  |
| C | -4.13295497 | 0.36709822  | 47.51667938  |
| C | 2.38439387  | 3.39569489  | 47.51667938  |
| C | -4.15095338 | -0.36323490 | 46.26263115  |
| C | 2.39004734  | -3.41321363 | 46.26263115  |
| C | 1.76090604  | 3.77644853  | 46.26263115  |
| C | 4.15095338  | 0.36323490  | 46.26263115  |
| C | -2.39004734 | 3.41321363  | 46.26263115  |
| C | -1.76090604 | -3.77644853 | 46.26263115  |
| C | -0.36323490 | -4.15095338 | -46.26263115 |
| C | -3.41321363 | 2.39004734  | -46.26263115 |
| C | 3.77644853  | 1.76090604  | -46.26263115 |
| C | 0.36323490  | 4.15095338  | -46.26263115 |
| C | 3.41321363  | -2.39004734 | -46.26263115 |
| C | -3.77644853 | -1.76090604 | -46.26263115 |
| C | 4.15095338  | 0.36323490  | -46.26263115 |
| C | -2.39004734 | 3.41321363  | -46.26263115 |
| C | -1.76090604 | -3.77644853 | -46.26263115 |
| C | -4.15095338 | -0.36323490 | -46.26263115 |
| C | 2.39004734  | -3.41321363 | -46.26263115 |
| C | 1.76090604  | 3.77644853  | -46.26263115 |
| C | 0.36323490  | 4.15095338  | 46.26263115  |
| C | 3.41321363  | -2.39004734 | 46.26263115  |
| C | -3.77644853 | -1.76090604 | 46.26263115  |
| C | -0.36323490 | -4.15095338 | 46.26263115  |
| C | -3.41321363 | 2.39004734  | 46.26263115  |
| C | 3.77644853  | 1.76090604  | 46.26263115  |
| C | -3.41855237 | -2.39307951 | 45.01905440  |

|   |             |             |              |
|---|-------------|-------------|--------------|
| C | 3.78174384  | -1.76401344 | 45.01905440  |
| C | -0.36319146 | 4.15709296  | 45.01905440  |
| C | 3.41855237  | 2.39307951  | 45.01905440  |
| C | -3.78174384 | 1.76401344  | 45.01905440  |
| C | 0.36319146  | -4.15709296 | 45.01905440  |
| C | -2.39307951 | -3.41855237 | -45.01905440 |
| C | -1.76401344 | 3.78174384  | -45.01905440 |
| C | 4.15709296  | -0.36319146 | -45.01905440 |
| C | 2.39307951  | 3.41855237  | -45.01905440 |
| C | 1.76401344  | -3.78174384 | -45.01905440 |
| C | -4.15709296 | 0.36319146  | -45.01905440 |
| C | 3.41855237  | 2.39307951  | -45.01905440 |
| C | -3.78174384 | 1.76401344  | -45.01905440 |
| C | 0.36319146  | -4.15709296 | -45.01905440 |
| C | -3.41855237 | -2.39307951 | -45.01905440 |
| C | 3.78174384  | -1.76401344 | -45.01905440 |
| C | -0.36319146 | 4.15709296  | -45.01905440 |
| C | 2.39307951  | 3.41855237  | 45.01905440  |
| C | 1.76401344  | -3.78174384 | 45.01905440  |
| C | -4.15709296 | 0.36319146  | 45.01905440  |
| C | -2.39307951 | -3.41855237 | 45.01905440  |
| C | -1.76401344 | 3.78174384  | 45.01905440  |
| C | 4.15709296  | -0.36319146 | 45.01905440  |
| C | -1.75668688 | -3.77728757 | 43.76706667  |
| C | 4.14957043  | 0.36730832  | 43.76706667  |
| C | -2.39288356 | 3.40997925  | 43.76706667  |
| C | 1.75668688  | 3.77728757  | 43.76706667  |
| C | -4.14957043 | -0.36730832 | 43.76706667  |
| C | 2.39288356  | -3.40997925 | 43.76706667  |
| C | -3.77728757 | -1.75668688 | -43.76706667 |
| C | 0.36730832  | 4.14957043  | -43.76706667 |
| C | 3.40997925  | -2.39288356 | -43.76706667 |
| C | 3.77728757  | 1.75668688  | -43.76706667 |
| C | -0.36730832 | -4.14957043 | -43.76706667 |
| C | -3.40997925 | 2.39288356  | -43.76706667 |
| C | 1.75668688  | 3.77728757  | -43.76706667 |
| C | -4.14957043 | -0.36730832 | -43.76706667 |
| C | 2.39288356  | -3.40997925 | -43.76706667 |
| C | -1.75668688 | -3.77728757 | -43.76706667 |
| C | 4.14957043  | 0.36730832  | -43.76706667 |
| C | -2.39288356 | 3.40997925  | -43.76706667 |
| C | 3.77728757  | 1.75668688  | 43.76706667  |
| C | -0.36730832 | -4.14957043 | 43.76706667  |
| C | -3.40997925 | 2.39288356  | 43.76706667  |
| C | -3.77728757 | -1.75668688 | 43.76706667  |
| C | 0.36730832  | 4.14957043  | 43.76706667  |
| C | 3.40997925  | -2.39288356 | 43.76706667  |
| C | 0.36488891  | -4.15307973 | 42.51243240  |
| C | 3.41422810  | 2.39254293  | 42.51243240  |
| C | -3.77911700 | 1.76053680  | 42.51243240  |
| C | -0.36488891 | 4.15307973  | 42.51243240  |
| C | -3.41422810 | -2.39254293 | 42.51243240  |
| C | 3.77911700  | -1.76053680 | 42.51243240  |
| C | -4.15307973 | 0.36488891  | -42.51243240 |
| C | 2.39254293  | 3.41422810  | -42.51243240 |
| C | 1.76053680  | -3.77911700 | -42.51243240 |
| C | 4.15307973  | -0.36488891 | -42.51243240 |
| C | -2.39254293 | -3.41422810 | -42.51243240 |
| C | -1.76053680 | 3.77911700  | -42.51243240 |
| C | -0.36488891 | 4.15307973  | -42.51243240 |
| C | -3.41422810 | -2.39254293 | -42.51243240 |
| C | 3.77911700  | -1.76053680 | -42.51243240 |
| C | 0.36488891  | -4.15307973 | -42.51243240 |
| C | 3.41422810  | 2.39254293  | -42.51243240 |
| C | -3.77911700 | 1.76053680  | -42.51243240 |
| C | 4.15307973  | -0.36488891 | 42.51243240  |
| C | -2.39254293 | -3.41422810 | 42.51243240  |
| C | -1.76053680 | 3.77911700  | 42.51243240  |
| C | -4.15307973 | 0.36488891  | 42.51243240  |
| C | 2.39254293  | 3.41422810  | 42.51243240  |

|   |             |             |              |
|---|-------------|-------------|--------------|
| C | 1.76053680  | -3.77911700 | 42.51243240  |
| C | 2.39277641  | -3.41802649 | 41.26616039  |
| C | 1.76370957  | 3.78121841  | 41.26616039  |
| C | -4.15648598 | -0.36319191 | 41.26616039  |
| C | -2.39277641 | 3.41802649  | 41.26616039  |
| C | -1.76370957 | -3.78121841 | 41.26616039  |
| C | 4.15648598  | 0.36319191  | 41.26616039  |
| C | -3.41802649 | 2.39277641  | -41.26616039 |
| C | 3.78121841  | 1.76370957  | -41.26616039 |
| C | -0.36319191 | -4.15648598 | -41.26616039 |
| C | 3.41802649  | -2.39277641 | -41.26616039 |
| C | -3.78121841 | -1.76370957 | -41.26616039 |
| C | 0.36319191  | 4.15648598  | -41.26616039 |
| C | -2.39277641 | 3.41802649  | -41.26616039 |
| C | -1.76370957 | -3.78121841 | -41.26616039 |
| C | 4.15648598  | 0.36319191  | -41.26616039 |
| C | 2.39277641  | -3.41802649 | -41.26616039 |
| C | 1.76370957  | 3.78121841  | -41.26616039 |
| C | -4.15648598 | -0.36319191 | -41.26616039 |
| C | 3.41802649  | -2.39277641 | 41.26616039  |
| C | -3.78121841 | -1.76370957 | 41.26616039  |
| C | 0.36319191  | 4.15648598  | 41.26616039  |
| C | -3.41802649 | 2.39277641  | 41.26616039  |
| C | 3.78121841  | 1.76370957  | 41.26616039  |
| C | -0.36319191 | -4.15648598 | 41.26616039  |
| C | 3.77688762  | -1.75768994 | 40.01612718  |
| C | -0.36623968 | 4.14972560  | 40.01612718  |
| C | -3.41064795 | -2.39203566 | 40.01612718  |
| C | -3.77688762 | 1.75768994  | 40.01612718  |
| C | 0.36623968  | -4.14972560 | 40.01612718  |
| C | 3.41064795  | 2.39203566  | 40.01612718  |
| C | -1.75768994 | 3.77688762  | -40.01612718 |
| C | 4.14972560  | -0.36623968 | -40.01612718 |
| C | -2.39203566 | -3.41064795 | -40.01612718 |
| C | 1.75768994  | -3.77688762 | -40.01612718 |
| C | -4.14972560 | 0.36623968  | -40.01612718 |
| C | 2.39203566  | 3.41064795  | -40.01612718 |
| C | -3.77688762 | 1.75768994  | -40.01612718 |
| C | 0.36623968  | -4.14972560 | -40.01612718 |
| C | 3.41064795  | 2.39203566  | -40.01612718 |
| C | 3.77688762  | -1.75768994 | -40.01612718 |
| C | -0.36623968 | 4.14972560  | -40.01612718 |
| C | -3.41064795 | -2.39203566 | -40.01612718 |
| C | 1.75768994  | -3.77688762 | 40.01612718  |
| C | -4.14972560 | 0.36623968  | 40.01612718  |
| C | 2.39203566  | 3.41064795  | 40.01612718  |
| C | -1.75768994 | 3.77688762  | 40.01612718  |
| C | 4.14972560  | -0.36623968 | 40.01612718  |
| C | -2.39203566 | -3.41064795 | 40.01612718  |
| C | 4.15084416  | 0.36525128  | 38.76131451  |
| C | -2.39173896 | 3.41211085  | 38.76131451  |
| C | -1.75910519 | -3.77736213 | 38.76131451  |
| C | -4.15084416 | -0.36525128 | 38.76131451  |
| C | 2.39173896  | -3.41211085 | 38.76131451  |
| C | 1.75910519  | 3.77736213  | 38.76131451  |
| C | 0.36525128  | 4.15084416  | -38.76131451 |
| C | 3.41211085  | -2.39173896 | -38.76131451 |
| C | -3.77736213 | -1.75910519 | -38.76131451 |
| C | -0.36525128 | -4.15084416 | -38.76131451 |
| C | -3.41211085 | 2.39173896  | -38.76131451 |
| C | 3.77736213  | 1.75910519  | -38.76131451 |
| C | -4.15084416 | -0.36525128 | -38.76131451 |
| C | 2.39173896  | -3.41211085 | -38.76131451 |
| C | 1.75910519  | 3.77736213  | -38.76131451 |
| C | 4.15084416  | 0.36525128  | -38.76131451 |
| C | -2.39173896 | 3.41211085  | -38.76131451 |
| C | -1.75910519 | -3.77736213 | -38.76131451 |
| C | -0.36525128 | -4.15084416 | 38.76131451  |
| C | -3.41211085 | 2.39173896  | 38.76131451  |
| C | 3.77736213  | 1.75910519  | 38.76131451  |



|   |             |             |              |
|---|-------------|-------------|--------------|
| C | 0.36525128  | 4.15084416  | 38.76131451  |
| C | 3.41211085  | -2.39173896 | 38.76131451  |
| C | -3.77736213 | -1.75910519 | 38.76131451  |
| C | 3.41760711  | 2.39253137  | 37.51320625  |
| C | -3.78079650 | 1.76346890  | 37.51320625  |
| C | 0.36318939  | -4.15600026 | 37.51320625  |
| C | -3.41760711 | -2.39253137 | 37.51320625  |
| C | 3.78079650  | -1.76346890 | 37.51320625  |
| C | -0.36318939 | 4.15600026  | 37.51320625  |
| C | 2.39253137  | 3.41760711  | -37.51320625 |
| C | 1.76346890  | -3.78079650 | -37.51320625 |
| C | -4.15600026 | 0.36318939  | -37.51320625 |
| C | -2.39253137 | -3.41760711 | -37.51320625 |
| C | -1.76346890 | 3.78079650  | -37.51320625 |
| C | 4.15600026  | -0.36318939 | -37.51320625 |
| C | -3.41760711 | -2.39253137 | -37.51320625 |
| C | 3.78079650  | -1.76346890 | -37.51320625 |
| C | -0.36318939 | 4.15600026  | -37.51320625 |
| C | 3.41760711  | 2.39253137  | -37.51320625 |
| C | -3.78079650 | 1.76346890  | -37.51320625 |
| C | 0.36318939  | -4.15600026 | -37.51320625 |
| C | -2.39253137 | -3.41760711 | 37.51320625  |
| C | -1.76346890 | 3.78079650  | 37.51320625  |
| C | 4.15600026  | -0.36318939 | 37.51320625  |
| C | 2.39253137  | 3.41760711  | 37.51320625  |
| C | 1.76346890  | -3.78079650 | 37.51320625  |
| C | -4.15600026 | 0.36318939  | 37.51320625  |
| C | 1.75907457  | 3.77821985  | 36.26450582  |
| C | -4.15157166 | -0.36570666 | 36.26450582  |
| C | 2.39249709  | -3.41251319 | 36.26450582  |
| C | -1.75907457 | -3.77821985 | 36.26450582  |
| C | 4.15157166  | 0.36570666  | 36.26450582  |
| C | -2.39249709 | 3.41251319  | 36.26450582  |
| C | 3.77821985  | 1.75907457  | -36.26450582 |
| C | -0.36570666 | -4.15157166 | -36.26450582 |
| C | -3.41251319 | 2.39249709  | -36.26450582 |
| C | -3.77821985 | -1.75907457 | -36.26450582 |
| C | 0.36570666  | 4.15157166  | -36.26450582 |
| C | 3.41251319  | -2.39249709 | -36.26450582 |
| C | -1.75907457 | -3.77821985 | -36.26450582 |
| C | 4.15157166  | 0.36570666  | -36.26450582 |
| C | -2.39249709 | 3.41251319  | -36.26450582 |
| C | 1.75907457  | 3.77821985  | -36.26450582 |
| C | -4.15157166 | -0.36570666 | -36.26450582 |
| C | 2.39249709  | -3.41251319 | -36.26450582 |
| C | -3.77821985 | -1.75907457 | 36.26450582  |
| C | 0.36570666  | 4.15157166  | 36.26450582  |
| C | 3.41251319  | -2.39249709 | 36.26450582  |
| C | 3.77821985  | 1.75907457  | 36.26450582  |
| C | -0.36570666 | -4.15157166 | 36.26450582  |
| C | -3.41251319 | 2.39249709  | 36.26450582  |
| C | -0.36581886 | 4.15068123  | 35.01003034  |
| C | -3.41168596 | -2.39214904 | 35.01003034  |
| C | 3.77750481  | -1.75853219 | 35.01003034  |
| C | 0.36581886  | -4.15068123 | 35.01003034  |
| C | 3.41168596  | 2.39214904  | 35.01003034  |
| C | -3.77750481 | 1.75853219  | 35.01003034  |
| C | 4.15068123  | -0.36581886 | -35.01003034 |
| C | -2.39214904 | -3.41168596 | -35.01003034 |
| C | -1.75853219 | 3.77750481  | -35.01003034 |
| C | -4.15068123 | 0.36581886  | -35.01003034 |
| C | 2.39214904  | 3.41168596  | -35.01003034 |
| C | 1.75853219  | -3.77750481 | -35.01003034 |
| C | 0.36581886  | -4.15068123 | -35.01003034 |
| C | 3.41168596  | 2.39214904  | -35.01003034 |
| C | -3.77750481 | 1.75853219  | -35.01003034 |
| C | -0.36581886 | 4.15068123  | -35.01003034 |
| C | -3.41168596 | -2.39214904 | -35.01003034 |
| C | 3.77750481  | -1.75853219 | -35.01003034 |
| C | -4.15068123 | 0.36581886  | 35.01003034  |

|   |             |             |              |
|---|-------------|-------------|--------------|
| C | 2.39214904  | 3.41168596  | 35.01003034  |
| C | 1.75853219  | -3.77750481 | 35.01003034  |
| C | 4.15068123  | -0.36581886 | 35.01003034  |
| C | -2.39214904 | -3.41168596 | 35.01003034  |
| C | -1.75853219 | 3.77750481  | 35.01003034  |
| C | -2.39241894 | 3.41688243  | 33.76058506  |
| C | -1.76289752 | -3.78033679 | 33.76058506  |
| C | 4.15531646  | 0.36345436  | 33.76058506  |
| C | 2.39241894  | -3.41688243 | 33.76058506  |
| C | 1.76289752  | 3.78033679  | 33.76058506  |
| C | -4.15531646 | -0.36345436 | 33.76058506  |
| C | 3.41688243  | -2.39241894 | -33.76058506 |
| C | -3.78033679 | -1.76289752 | -33.76058506 |
| C | 0.36345436  | 4.15531646  | -33.76058506 |
| C | -3.41688243 | 2.39241894  | -33.76058506 |
| C | 3.78033679  | 1.76289752  | -33.76058506 |
| C | -0.36345436 | -4.15531646 | -33.76058506 |
| C | 2.39241894  | -3.41688243 | -33.76058506 |
| C | 1.76289752  | 3.78033679  | -33.76058506 |
| C | -4.15531646 | -0.36345436 | -33.76058506 |
| C | -2.39241894 | 3.41688243  | -33.76058506 |
| C | -1.76289752 | -3.78033679 | -33.76058506 |
| C | 4.15531646  | 0.36345436  | -33.76058506 |
| C | -3.41688243 | 2.39241894  | 33.76058506  |
| C | 3.78033679  | 1.76289752  | 33.76058506  |
| C | -0.36345436 | -4.15531646 | 33.76058506  |
| C | 3.41688243  | -2.39241894 | 33.76058506  |
| C | -3.78033679 | -1.76289752 | 33.76058506  |
| C | 0.36345436  | 4.15531646  | 33.76058506  |
| C | -3.77834317 | 1.75978622  | 32.51250358  |
| C | 0.36515201  | -4.15203427 | 32.51250358  |
| C | 3.41319115  | 2.39224806  | 32.51250358  |
| C | 3.77834317  | -1.75978622 | 32.51250358  |
| C | -0.36515201 | 4.15203427  | 32.51250358  |
| C | -3.41319115 | -2.39224806 | 32.51250358  |
| C | 1.75978622  | -3.77834317 | -32.51250358 |
| C | -4.15203427 | 0.36515201  | -32.51250358 |
| C | 2.39224806  | 3.41319115  | -32.51250358 |
| C | -1.75978622 | 3.77834317  | -32.51250358 |
| C | 4.15203427  | -0.36515201 | -32.51250358 |
| C | -2.39224806 | -3.41319115 | -32.51250358 |
| C | 3.77834317  | -1.75978622 | -32.51250358 |
| C | -0.36515201 | 4.15203427  | -32.51250358 |
| C | -3.41319115 | -2.39224806 | -32.51250358 |
| C | -3.77834317 | 1.75978622  | -32.51250358 |
| C | 0.36515201  | -4.15203427 | -32.51250358 |
| C | 3.41319115  | 2.39224806  | -32.51250358 |
| C | -1.75978622 | 3.77834317  | 32.51250358  |
| C | 4.15203427  | -0.36515201 | 32.51250358  |
| C | -2.39224806 | -3.41319115 | 32.51250358  |
| C | 1.75978622  | -3.77834317 | 32.51250358  |
| C | -4.15203427 | 0.36515201  | 32.51250358  |
| C | 2.39224806  | 3.41319115  | 32.51250358  |
| C | -4.15023391 | -0.36599106 | 31.25852951  |
| C | 2.39207451  | -3.41121247 | 31.25852951  |
| C | 1.75815940  | 3.77720353  | 31.25852951  |
| C | 4.15023391  | 0.36599106  | 31.25852951  |
| C | -2.39207451 | 3.41121247  | 31.25852951  |
| C | -1.75815940 | -3.77720353 | 31.25852951  |
| C | -0.36599106 | -4.15023391 | -31.25852951 |
| C | -3.41121247 | 2.39207451  | -31.25852951 |
| C | 3.77720353  | 1.75815940  | -31.25852951 |
| C | 0.36599106  | 4.15023391  | -31.25852951 |
| C | 3.41121247  | -2.39207451 | -31.25852951 |
| C | -3.77720353 | -1.75815940 | -31.25852951 |
| C | 4.15023391  | 0.36599106  | -31.25852951 |
| C | -2.39207451 | 3.41121247  | -31.25852951 |
| C | -1.75815940 | -3.77720353 | -31.25852951 |
| C | -4.15023391 | -0.36599106 | -31.25852951 |
| C | 2.39207451  | -3.41121247 | -31.25852951 |

|   |             |             |              |
|---|-------------|-------------|--------------|
| C | 1.75815940  | 3.77720353  | -31.25852951 |
| C | 0.36599106  | 4.15023391  | 31.25852951  |
| C | 3.41121247  | -2.39207451 | 31.25852951  |
| C | -3.77720353 | -1.75815940 | 31.25852951  |
| C | -0.36599106 | -4.15023391 | 31.25852951  |
| C | -3.41121247 | 2.39207451  | 31.25852951  |
| C | 3.77720353  | 1.75815940  | 31.25852951  |
| C | -3.41676320 | -2.39262070 | 30.00782638  |
| C | 3.78045191  | -1.76269337 | 30.00782638  |
| C | -0.36368871 | 4.15531408  | 30.00782638  |
| C | 3.41676320  | 2.39262070  | 30.00782638  |
| C | -3.78045191 | 1.76269337  | 30.00782638  |
| C | 0.36368871  | -4.15531408 | 30.00782638  |
| C | -2.39262070 | -3.41676320 | -30.00782638 |
| C | -1.76269337 | 3.78045191  | -30.00782638 |
| C | 4.15531408  | -0.36368871 | -30.00782638 |
| C | 2.39262070  | 3.41676320  | -30.00782638 |
| C | 1.76269337  | -3.78045191 | -30.00782638 |
| C | -4.15531408 | 0.36368871  | -30.00782638 |
| C | 3.41676320  | 2.39262070  | -30.00782638 |
| C | -3.78045191 | 1.76269337  | -30.00782638 |
| C | 0.36368871  | -4.15531408 | -30.00782638 |
| C | -3.41676320 | -2.39262070 | -30.00782638 |
| C | 3.78045191  | -1.76269337 | -30.00782638 |
| C | -0.36368871 | 4.15531408  | -30.00782638 |
| C | 2.39262070  | 3.41676320  | 30.00782638  |
| C | 1.76269337  | -3.78045191 | 30.00782638  |
| C | -4.15531408 | 0.36368871  | 30.00782638  |
| C | -2.39262070 | -3.41676320 | 30.00782638  |
| C | -1.76269337 | 3.78045191  | 30.00782638  |
| C | 4.15531408  | -0.36368871 | 30.00782638  |
| C | -1.76095250 | -3.77932624 | 28.76022590  |
| C | 4.15346878  | 0.36463352  | 28.76022590  |
| C | -2.39251629 | 3.41469272  | 28.76022590  |
| C | 1.76095250  | 3.77932624  | 28.76022590  |
| C | -4.15346878 | -0.36463352 | 28.76022590  |
| C | 2.39251629  | -3.41469272 | 28.76022590  |
| C | -3.77932624 | -1.76095250 | -28.76022590 |
| C | 0.36463352  | 4.15346878  | -28.76022590 |
| C | 3.41469272  | -2.39251629 | -28.76022590 |
| C | 3.77932624  | 1.76095250  | -28.76022590 |
| C | -0.36463352 | -4.15346878 | -28.76022590 |
| C | -3.41469272 | 2.39251629  | -28.76022590 |
| C | 1.76095250  | 3.77932624  | -28.76022590 |
| C | -4.15346878 | -0.36463352 | -28.76022590 |
| C | 2.39251629  | -3.41469272 | -28.76022590 |
| C | -1.76095250 | -3.77932624 | -28.76022590 |
| C | 4.15346878  | 0.36463352  | -28.76022590 |
| C | -2.39251629 | 3.41469272  | -28.76022590 |
| C | 3.77932624  | 1.76095250  | 28.76022590  |
| C | -0.36463352 | -4.15346878 | 28.76022590  |
| C | -3.41469272 | 2.39251629  | 28.76022590  |
| C | -3.77932624 | -1.76095250 | 28.76022590  |
| C | 0.36463352  | 4.15346878  | 28.76022590  |
| C | 3.41469272  | -2.39251629 | 28.76022590  |
| C | 0.36612748  | -4.15016267 | 27.50703759  |
| C | 3.41108256  | 2.39215704  | 27.50703759  |
| C | -3.77721004 | 1.75800563  | 27.50703759  |
| C | -0.36612748 | 4.15016267  | 27.50703759  |
| C | -3.41108256 | -2.39215704 | 27.50703759  |
| C | 3.77721004  | -1.75800563 | 27.50703759  |
| C | -4.15016267 | 0.36612748  | -27.50703759 |
| C | 2.39215704  | 3.41108256  | -27.50703759 |
| C | 1.75800563  | -3.77721004 | -27.50703759 |
| C | 4.15016267  | -0.36612748 | -27.50703759 |
| C | -2.39215704 | -3.41108256 | -27.50703759 |
| C | -1.75800563 | 3.77721004  | -27.50703759 |
| C | -0.36612748 | 4.15016267  | -27.50703759 |
| C | -3.41108256 | -2.39215704 | -27.50703759 |
| C | 3.77721004  | -1.75800563 | -27.50703759 |

|   |             |             |              |
|---|-------------|-------------|--------------|
| C | 0.36612748  | -4.15016267 | -27.50703759 |
| C | 3.41108256  | 2.39215704  | -27.50703759 |
| C | -3.77721004 | 1.75800563  | -27.50703759 |
| C | 4.15016267  | -0.36612748 | 27.50703759  |
| C | -2.39215704 | -3.41108256 | 27.50703759  |
| C | -1.75800563 | 3.77721004  | 27.50703759  |
| C | -4.15016267 | 0.36612748  | 27.50703759  |
| C | 2.39215704  | 3.41108256  | 27.50703759  |
| C | 1.75800563  | -3.77721004 | 27.50703759  |
| C | 2.39268612  | -3.41596934 | 26.25529699  |
| C | 1.76197317  | 3.78011163  | 26.25529699  |
| C | -4.15465929 | -0.36414229 | 26.25529699  |
| C | -2.39268612 | 3.41596934  | 26.25529699  |
| C | -1.76197317 | -3.78011163 | 26.25529699  |
| C | 4.15465929  | 0.36414229  | 26.25529699  |
| C | -3.41596934 | 2.39268612  | -26.25529699 |
| C | 3.78011163  | 1.76197317  | -26.25529699 |
| C | -0.36414229 | -4.15465929 | -26.25529699 |
| C | 3.41596934  | -2.39268612 | -26.25529699 |
| C | -3.78011163 | -1.76197317 | -26.25529699 |
| C | 0.36414229  | 4.15465929  | -26.25529699 |
| C | -2.39268612 | 3.41596934  | -26.25529699 |
| C | -1.76197317 | -3.78011163 | -26.25529699 |
| C | 4.15465929  | 0.36414229  | -26.25529699 |
| C | 2.39268612  | -3.41596934 | -26.25529699 |
| C | 1.76197317  | 3.78011163  | -26.25529699 |
| C | -4.15465929 | -0.36414229 | -26.25529699 |
| C | 3.41596934  | -2.39268612 | 26.25529699  |
| C | -3.78011163 | -1.76197317 | 26.25529699  |
| C | 0.36414229  | 4.15465929  | 26.25529699  |
| C | -3.41596934 | 2.39268612  | 26.25529699  |
| C | 3.78011163  | 1.76197317  | 26.25529699  |
| C | -0.36414229 | -4.15465929 | 26.25529699  |
| C | 3.78013096  | -1.76162633 | 25.00803062  |
| C | -0.36445232 | 4.15450260  | 25.00803062  |
| C | -3.41567863 | -2.39287627 | 25.00803062  |
| C | -3.78013096 | 1.76162633  | 25.00803062  |
| C | 0.36445232  | -4.15450260 | 25.00803062  |
| C | 3.41567863  | 2.39287627  | 25.00803062  |
| C | -1.76162633 | 3.78013096  | -25.00803062 |
| C | 4.15450260  | -0.36445232 | -25.00803062 |
| C | -2.39287627 | -3.41567863 | -25.00803062 |
| C | 1.76162633  | -3.78013096 | -25.00803062 |
| C | -4.15450260 | 0.36445232  | -25.00803062 |
| C | 2.39287627  | 3.41567863  | -25.00803062 |
| C | -3.78013096 | 1.76162633  | -25.00803062 |
| C | 0.36445232  | -4.15450260 | -25.00803062 |
| C | 3.41567863  | 2.39287627  | -25.00803062 |
| C | 3.78013096  | -1.76162633 | -25.00803062 |
| C | -0.36445232 | 4.15450260  | -25.00803062 |
| C | -3.41567863 | -2.39287627 | -25.00803062 |
| C | 1.76162633  | -3.78013096 | 25.00803062  |
| C | -4.15450260 | 0.36445232  | 25.00803062  |
| C | 2.39287627  | 3.41567863  | 25.00803062  |
| C | -1.76162633 | 3.78013096  | 25.00803062  |
| C | 4.15450260  | -0.36445232 | 25.00803062  |
| C | -2.39287627 | -3.41567863 | 25.00803062  |
| C | 4.15048732  | 0.36625076  | 23.75592566  |
| C | -2.39242612 | 3.41130207  | 23.75592566  |
| C | -1.75806119 | -3.77755284 | 23.75592566  |
| C | -4.15048732 | -0.36625076 | 23.75592566  |
| C | 2.39242612  | -3.41130207 | 23.75592566  |
| C | 1.75806119  | 3.77755284  | 23.75592566  |
| C | 0.36625076  | 4.15048732  | -23.75592566 |
| C | 3.41130207  | -2.39242612 | -23.75592566 |
| C | -3.77755284 | -1.75806119 | -23.75592566 |
| C | -0.36625076 | -4.15048732 | -23.75592566 |
| C | -3.41130207 | 2.39242612  | -23.75592566 |
| C | 3.77755284  | 1.75806119  | -23.75592566 |
| C | -4.15048732 | -0.36625076 | -23.75592566 |

|   |             |             |              |
|---|-------------|-------------|--------------|
| C | 2.39242612  | -3.41130207 | -23.75592566 |
| C | 1.75806119  | 3.77755284  | -23.75592566 |
| C | 4.15048732  | 0.36625076  | -23.75592566 |
| C | -2.39242612 | 3.41130207  | -23.75592566 |
| C | -1.75806119 | -3.77755284 | -23.75592566 |
| C | -0.36625076 | -4.15048732 | 23.75592566  |
| C | -3.41130207 | 2.39242612  | 23.75592566  |
| C | 3.77755284  | 1.75806119  | 23.75592566  |
| C | 0.36625076  | 4.15048732  | 23.75592566  |
| C | 3.41130207  | -2.39242612 | 23.75592566  |
| C | -3.77755284 | -1.75806119 | 23.75592566  |
| C | 3.41525186  | 2.39269326  | 22.50373509  |
| C | -3.77975908 | 1.76134824  | 22.50373509  |
| C | 0.36450722  | -4.15404150 | 22.50373509  |
| C | -3.41525186 | -2.39269326 | 22.50373509  |
| C | 3.77975908  | -1.76134824 | 22.50373509  |
| C | -0.36450722 | 4.15404150  | 22.50373509  |
| C | 2.39269326  | 3.41525186  | -22.50373509 |
| C | 1.76134824  | -3.77975908 | -22.50373509 |
| C | -4.15404150 | 0.36450722  | -22.50373509 |
| C | -2.39269326 | -3.41525186 | -22.50373509 |
| C | -1.76134824 | 3.77975908  | -22.50373509 |
| C | 4.15404150  | -0.36450722 | -22.50373509 |
| C | -3.41525186 | -2.39269326 | -22.50373509 |
| C | 3.77975908  | -1.76134824 | -22.50373509 |
| C | -0.36450722 | 4.15404150  | -22.50373509 |
| C | 3.41525186  | 2.39269326  | -22.50373509 |
| C | -3.77975908 | 1.76134824  | -22.50373509 |
| C | 0.36450722  | -4.15404150 | -22.50373509 |
| C | -2.39269326 | -3.41525186 | 22.50373509  |
| C | -1.76134824 | 3.77975908  | 22.50373509  |
| C | 4.15404150  | -0.36450722 | 22.50373509  |
| C | 2.39269326  | 3.41525186  | 22.50373509  |
| C | 1.76134824  | -3.77975908 | 22.50373509  |
| C | -4.15404150 | 0.36450722  | 22.50373509  |
| C | 1.76233061  | 3.78062276  | 21.25651128  |
| C | -4.15528066 | -0.36408830 | 21.25651128  |
| C | 2.39295004  | -3.41653446 | 21.25651128  |
| C | -1.76233061 | -3.78062276 | 21.25651128  |
| C | 4.15528066  | 0.36408830  | 21.25651128  |
| C | -2.39295004 | 3.41653446  | 21.25651128  |
| C | 3.78062276  | 1.76233061  | -21.25651128 |
| C | -0.36408830 | -4.15528066 | -21.25651128 |
| C | -3.41653446 | 2.39295004  | -21.25651128 |
| C | -3.78062276 | -1.76233061 | -21.25651128 |
| C | 0.36408830  | 4.15528066  | -21.25651128 |
| C | 3.41653446  | -2.39295004 | -21.25651128 |
| C | -1.76233061 | -3.78062276 | -21.25651128 |
| C | 4.15528066  | 0.36408830  | -21.25651128 |
| C | -2.39295004 | 3.41653446  | -21.25651128 |
| C | 1.76233061  | 3.78062276  | -21.25651128 |
| C | -4.15528066 | -0.36408830 | -21.25651128 |
| C | 2.39295004  | -3.41653446 | -21.25651128 |
| C | -3.78062276 | -1.76233061 | 21.25651128  |
| C | 0.36408830  | 4.15528066  | 21.25651128  |
| C | 3.41653446  | -2.39295004 | 21.25651128  |
| C | 3.78062276  | 1.76233061  | 21.25651128  |
| C | -0.36408830 | -4.15528066 | 21.25651128  |
| C | -3.41653446 | 2.39295004  | 21.25651128  |
| C | -0.36602725 | 4.15092685  | 20.00567868  |
| C | -3.41179448 | -2.39245232 | 20.00567868  |
| C | 3.77782173  | -1.75847453 | 20.00567868  |
| C | 0.36602725  | -4.15092685 | 20.00567868  |
| C | 3.41179448  | 2.39245232  | 20.00567868  |
| C | -3.77782173 | 1.75847453  | 20.00567868  |
| C | 4.15092685  | -0.36602725 | -20.00567868 |
| C | -2.39245232 | -3.41179448 | -20.00567868 |
| C | -1.75847453 | 3.77782173  | -20.00567868 |
| C | -4.15092685 | 0.36602725  | -20.00567868 |
| C | 2.39245232  | 3.41179448  | -20.00567868 |

|   |             |             |              |
|---|-------------|-------------|--------------|
| C | 1.75847453  | -3.77782173 | -20.00567868 |
| C | 0.36602725  | -4.15092685 | -20.00567868 |
| C | 3.41179448  | 2.39245232  | -20.00567868 |
| C | -3.77782173 | 1.75847453  | -20.00567868 |
| C | -0.36602725 | 4.15092685  | -20.00567868 |
| C | -3.41179448 | -2.39245232 | -20.00567868 |
| C | 3.77782173  | -1.75847453 | -20.00567868 |
| C | -4.15092685 | 0.36602725  | 20.00567868  |
| C | 2.39245232  | 3.41179448  | 20.00567868  |
| C | 1.75847453  | -3.77782173 | 20.00567868  |
| C | 4.15092685  | -0.36602725 | 20.00567868  |
| C | -2.39245232 | -3.41179448 | 20.00567868  |
| C | -1.75847453 | 3.77782173  | 20.00567868  |
| C | -2.39267170 | 3.41440750  | 18.75309861  |
| C | -1.76062778 | -3.77931823 | 18.75309861  |
| C | 4.15329948  | 0.36491072  | 18.75309861  |
| C | 2.39267170  | -3.41440750 | 18.75309861  |
| C | 1.76062778  | 3.77931823  | 18.75309861  |
| C | -4.15329948 | -0.36491072 | 18.75309861  |
| C | 3.41440750  | -2.39267170 | -18.75309861 |
| C | -3.77931823 | -1.76062778 | -18.75309861 |
| C | 0.36491072  | 4.15329948  | -18.75309861 |
| C | -3.41440750 | 2.39267170  | -18.75309861 |
| C | 3.77931823  | 1.76062778  | -18.75309861 |
| C | -0.36491072 | -4.15329948 | -18.75309861 |
| C | 2.39267170  | -3.41440750 | -18.75309861 |
| C | 1.76062778  | 3.77931823  | -18.75309861 |
| C | -4.15329948 | -0.36491072 | -18.75309861 |
| C | -2.39267170 | 3.41440750  | -18.75309861 |
| C | -1.76062778 | -3.77931823 | -18.75309861 |
| C | 4.15329948  | 0.36491072  | -18.75309861 |
| C | -3.41440750 | 2.39267170  | 18.75309861  |
| C | 3.77931823  | 1.76062778  | 18.75309861  |
| C | -0.36491072 | -4.15329948 | 18.75309861  |
| C | 3.41440750  | -2.39267170 | 18.75309861  |
| C | -3.77931823 | -1.76062778 | 18.75309861  |
| C | 0.36491072  | 4.15329948  | 18.75309861  |
| C | -3.78092932 | 1.76265692  | 17.50548684  |
| C | 0.36395899  | -4.15570930 | 17.50548684  |
| C | 3.41697033  | 2.39305238  | 17.50548684  |
| C | 3.78092932  | -1.76265692 | 17.50548684  |
| C | -0.36395899 | 4.15570930  | 17.50548684  |
| C | -3.41697033 | -2.39305238 | 17.50548684  |
| C | 1.76265692  | -3.78092932 | -17.50548684 |
| C | -4.15570930 | 0.36395899  | -17.50548684 |
| C | 2.39305238  | 3.41697033  | -17.50548684 |
| C | -1.76265692 | 3.78092932  | -17.50548684 |
| C | 4.15570930  | -0.36395899 | -17.50548684 |
| C | -2.39305238 | -3.41697033 | -17.50548684 |
| C | 3.78092932  | -1.76265692 | -17.50548684 |
| C | -0.36395899 | 4.15570930  | -17.50548684 |
| C | -3.41697033 | -2.39305238 | -17.50548684 |
| C | -3.78092932 | 1.76265692  | -17.50548684 |
| C | 0.36395899  | -4.15570930 | -17.50548684 |
| C | 3.41697033  | 2.39305238  | -17.50548684 |
| C | -1.76265692 | 3.78092932  | 17.50548684  |
| C | 4.15570930  | -0.36395899 | 17.50548684  |
| C | -2.39305238 | -3.41697033 | 17.50548684  |
| C | 1.76265692  | -3.78092932 | 17.50548684  |
| C | -4.15570930 | 0.36395899  | 17.50548684  |
| C | 2.39305238  | 3.41697033  | 17.50548684  |
| C | -4.15138128 | -0.36590932 | 16.25573942  |
| C | 2.39257741  | -3.41224699 | 16.25573942  |
| C | 1.75880387  | 3.77815631  | 16.25573942  |
| C | 4.15138128  | 0.36590932  | 16.25573942  |
| C | -2.39257741 | 3.41224699  | 16.25573942  |
| C | -1.75880387 | -3.77815631 | 16.25573942  |
| C | -0.36590932 | -4.15138128 | -16.25573942 |
| C | -3.41224699 | 2.39257741  | -16.25573942 |
| C | 3.77815631  | 1.75880387  | -16.25573942 |

|   |             |             |              |
|---|-------------|-------------|--------------|
| C | 0.36590932  | 4.15138128  | -16.25573942 |
| C | 3.41224699  | -2.39257741 | -16.25573942 |
| C | -3.77815631 | -1.75880387 | -16.25573942 |
| C | 4.15138128  | 0.36590932  | -16.25573942 |
| C | -2.39257741 | 3.41224699  | -16.25573942 |
| C | -1.75880387 | -3.77815631 | -16.25573942 |
| C | -4.15138128 | -0.36590932 | -16.25573942 |
| C | 2.39257741  | -3.41224699 | -16.25573942 |
| C | 1.75880387  | 3.77815631  | -16.25573942 |
| C | 0.36590932  | 4.15138128  | 16.25573942  |
| C | 3.41224699  | -2.39257741 | 16.25573942  |
| C | -3.77815631 | -1.75880387 | 16.25573942  |
| C | -0.36590932 | -4.15138128 | 16.25573942  |
| C | -3.41224699 | 2.39257741  | 16.25573942  |
| C | 3.77815631  | 1.75880387  | 16.25573942  |
| C | -3.41343460 | -2.39259817 | 15.00281303  |
| C | 3.77876809  | -1.75982199 | 15.00281303  |
| C | -0.36533350 | 4.15242016  | 15.00281303  |
| C | 3.41343460  | 2.39259817  | 15.00281303  |
| C | -3.77876809 | 1.75982199  | 15.00281303  |
| C | 0.36533350  | -4.15242016 | 15.00281303  |
| C | -2.39259817 | -3.41343460 | -15.00281303 |
| C | -1.75982199 | 3.77876809  | -15.00281303 |
| C | 4.15242016  | -0.36533350 | -15.00281303 |
| C | 2.39259817  | 3.41343460  | -15.00281303 |
| C | 1.75982199  | -3.77876809 | -15.00281303 |
| C | -4.15242016 | 0.36533350  | -15.00281303 |
| C | 3.41343460  | 2.39259817  | -15.00281303 |
| C | -3.77876809 | 1.75982199  | -15.00281303 |
| C | 0.36533350  | -4.15242016 | -15.00281303 |
| C | -3.41343460 | -2.39259817 | -15.00281303 |
| C | 3.77876809  | -1.75982199 | -15.00281303 |
| C | -0.36533350 | 4.15242016  | -15.00281303 |
| C | 2.39259817  | 3.41343460  | 15.00281303  |
| C | 1.75982199  | -3.77876809 | 15.00281303  |
| C | -4.15242016 | 0.36533350  | 15.00281303  |
| C | -2.39259817 | -3.41343460 | 15.00281303  |
| C | -1.75982199 | 3.77876809  | 15.00281303  |
| C | 4.15242016  | -0.36533350 | 15.00281303  |
| C | -1.76275473 | -3.78089849 | 13.75458218  |
| C | 4.15573151  | 0.36385887  | 13.75458218  |
| C | -2.39297678 | 3.41703963  | 13.75458218  |
| C | 1.76275473  | 3.78089849  | 13.75458218  |
| C | -4.15573151 | -0.36385887 | 13.75458218  |
| C | 2.39297678  | -3.41703963 | 13.75458218  |
| C | -3.78089849 | -1.76275473 | -13.75458218 |
| C | 0.36385887  | 4.15573151  | -13.75458218 |
| C | 3.41703963  | -2.39297678 | -13.75458218 |
| C | 3.78089849  | 1.76275473  | -13.75458218 |
| C | -0.36385887 | -4.15573151 | -13.75458218 |
| C | -3.41703963 | 2.39297678  | -13.75458218 |
| C | 1.76275473  | 3.78089849  | -13.75458218 |
| C | -4.15573151 | -0.36385887 | -13.75458218 |
| C | 2.39297678  | -3.41703963 | -13.75458218 |
| C | -1.76275473 | -3.78089849 | -13.75458218 |
| C | 4.15573151  | 0.36385887  | -13.75458218 |
| C | -2.39297678 | 3.41703963  | -13.75458218 |
| C | 3.78089849  | 1.76275473  | 13.75458218  |
| C | -0.36385887 | -4.15573151 | 13.75458218  |
| C | -3.41703963 | 2.39297678  | 13.75458218  |
| C | -3.78089849 | -1.76275473 | 13.75458218  |
| C | 0.36385887  | 4.15573151  | 13.75458218  |
| C | 3.41703963  | -2.39297678 | 13.75458218  |
| C | 0.36555441  | -4.15184772 | 12.50575678  |
| C | 3.41282840  | 2.39250326  | 12.50575678  |
| C | -3.77838280 | 1.75934446  | 12.50575678  |
| C | -0.36555441 | 4.15184772  | 12.50575678  |
| C | -3.41282840 | -2.39250326 | 12.50575678  |
| C | 3.77838280  | -1.75934446 | 12.50575678  |
| C | -4.15184772 | 0.36555441  | -12.50575678 |

|   |             |             |              |
|---|-------------|-------------|--------------|
| C | 2.39250326  | 3.41282840  | -12.50575678 |
| C | 1.75934446  | -3.77838280 | -12.50575678 |
| C | 4.15184772  | -0.36555441 | -12.50575678 |
| C | -2.39250326 | -3.41282840 | -12.50575678 |
| C | -1.75934446 | 3.77838280  | -12.50575678 |
| C | -0.36555441 | 4.15184772  | -12.50575678 |
| C | -3.41282840 | -2.39250326 | -12.50575678 |
| C | 3.77838280  | -1.75934446 | -12.50575678 |
| C | 0.36555441  | -4.15184772 | -12.50575678 |
| C | 3.41282840  | 2.39250326  | -12.50575678 |
| C | -3.77838280 | 1.75934446  | -12.50575678 |
| C | 4.15184772  | -0.36555441 | 12.50575678  |
| C | -2.39250326 | -3.41282840 | 12.50575678  |
| C | -1.75934446 | 3.77838280  | 12.50575678  |
| C | -4.15184772 | 0.36555441  | 12.50575678  |
| C | 2.39250326  | 3.41282840  | 12.50575678  |
| C | 1.75934446  | -3.77838280 | 12.50575678  |
| C | 2.39238683  | -3.41253953 | 11.25279114  |
| C | 1.75915251  | 3.77813754  | 11.25279114  |
| C | -4.15153934 | -0.36559801 | 11.25279114  |
| C | -2.39238683 | 3.41253953  | 11.25279114  |
| C | -1.75915251 | -3.77813754 | 11.25279114  |
| C | 4.15153934  | 0.36559801  | 11.25279114  |
| C | -3.41253953 | 2.39238683  | -11.25279114 |
| C | 3.77813754  | 1.75915251  | -11.25279114 |
| C | -0.36559801 | -4.15153934 | -11.25279114 |
| C | 3.41253953  | -2.39238683 | -11.25279114 |
| C | -3.77813754 | -1.75915251 | -11.25279114 |
| C | 0.36559801  | 4.15153934  | -11.25279114 |
| C | -2.39238683 | 3.41253953  | -11.25279114 |
| C | -1.75915251 | -3.77813754 | -11.25279114 |
| C | 4.15153934  | 0.36559801  | -11.25279114 |
| C | 2.39238683  | -3.41253953 | -11.25279114 |
| C | 1.75915251  | 3.77813754  | -11.25279114 |
| C | -4.15153934 | -0.36559801 | -11.25279114 |
| C | 3.41253953  | -2.39238683 | 11.25279114  |
| C | -3.77813754 | -1.75915251 | 11.25279114  |
| C | 0.36559801  | 4.15153934  | 11.25279114  |
| C | -3.41253953 | 2.39238683  | 11.25279114  |
| C | 3.77813754  | 1.75915251  | 11.25279114  |
| C | -0.36559801 | -4.15153934 | 11.25279114  |
| C | 3.78066155  | -1.76261947 | 10.00376117  |
| C | -0.36385754 | 4.15545868  | 10.00376117  |
| C | -3.41680401 | -2.39283921 | 10.00376117  |
| C | -3.78066155 | 1.76261947  | 10.00376117  |
| C | 0.36385754  | -4.15545868 | 10.00376117  |
| C | 3.41680401  | 2.39283921  | 10.00376117  |
| C | -1.76261947 | 3.78066155  | -10.00376117 |
| C | 4.15545868  | -0.36385754 | -10.00376117 |
| C | -2.39283921 | -3.41680401 | -10.00376117 |
| C | 1.76261947  | -3.78066155 | -10.00376117 |
| C | -4.15545868 | 0.36385754  | -10.00376117 |
| C | 2.39283921  | 3.41680401  | -10.00376117 |
| C | -3.78066155 | 1.76261947  | -10.00376117 |
| C | 0.36385754  | -4.15545868 | -10.00376117 |
| C | 3.41680401  | 2.39283921  | -10.00376117 |
| C | 3.78066155  | -1.76261947 | -10.00376117 |
| C | -0.36385754 | 4.15545868  | -10.00376117 |
| C | -3.41680401 | -2.39283921 | -10.00376117 |
| C | 1.76261947  | -3.78066155 | 10.00376117  |
| C | -4.15545868 | 0.36385754  | 10.00376117  |
| C | 2.39283921  | 3.41680401  | 10.00376117  |
| C | -1.76261947 | 3.78066155  | 10.00376117  |
| C | 4.15545868  | -0.36385754 | 10.00376117  |
| C | -2.39283921 | -3.41680401 | 10.00376117  |
| C | 4.15239775  | 0.36521161  | 8.75561924   |
| C | -2.39248141 | 3.41347613  | 8.75561924   |
| C | -1.75991634 | -3.77868774 | 8.75561924   |
| C | -4.15239775 | -0.36521161 | 8.75561924   |
| C | 2.39248141  | -3.41347613 | 8.75561924   |



|   |             |             |             |
|---|-------------|-------------|-------------|
| C | 1.75991634  | 3.77868774  | 8.75561924  |
| C | 0.36521161  | 4.15239775  | -8.75561924 |
| C | 3.41347613  | -2.39248141 | -8.75561924 |
| C | -3.77868774 | -1.75991634 | -8.75561924 |
| C | -0.36521161 | -4.15239775 | -8.75561924 |
| C | -3.41347613 | 2.39248141  | -8.75561924 |
| C | 3.77868774  | 1.75991634  | -8.75561924 |
| C | -4.15239775 | -0.36521161 | -8.75561924 |
| C | 2.39248141  | -3.41347613 | -8.75561924 |
| C | 1.75991634  | 3.77868774  | -8.75561924 |
| C | 4.15239775  | 0.36521161  | -8.75561924 |
| C | -2.39248141 | 3.41347613  | -8.75561924 |
| C | -1.75991634 | -3.77868774 | -8.75561924 |
| C | -0.36521161 | -4.15239775 | 8.75561924  |
| C | -3.41347613 | 2.39248141  | 8.75561924  |
| C | 3.77868774  | 1.75991634  | 8.75561924  |
| C | 0.36521161  | 4.15239775  | 8.75561924  |
| C | 3.41347613  | -2.39248141 | 8.75561924  |
| C | -3.77868774 | -1.75991634 | 8.75561924  |
| C | 3.41184265  | 2.39224006  | 7.50272817  |
| C | -3.77766199 | 1.75862238  | 7.50272817  |
| C | 0.36581934  | -4.15086244 | 7.50272817  |
| C | -3.41184265 | -2.39224006 | 7.50272817  |
| C | 3.77766199  | -1.75862238 | 7.50272817  |
| C | -0.36581934 | 4.15086244  | 7.50272817  |
| C | 2.39224006  | 3.41184265  | -7.50272817 |
| C | 1.75862238  | -3.77766199 | -7.50272817 |
| C | -4.15086244 | 0.36581934  | -7.50272817 |
| C | -2.39224006 | -3.41184265 | -7.50272817 |
| C | -1.75862238 | 3.77766199  | -7.50272817 |
| C | 4.15086244  | -0.36581934 | -7.50272817 |
| C | -3.41184265 | -2.39224006 | -7.50272817 |
| C | 3.77766199  | -1.75862238 | -7.50272817 |
| C | -0.36581934 | 4.15086244  | -7.50272817 |
| C | 3.41184265  | 2.39224006  | -7.50272817 |
| C | -3.77766199 | 1.75862238  | -7.50272817 |
| C | 0.36581934  | -4.15086244 | -7.50272817 |
| C | -2.39224006 | -3.41184265 | 7.50272817  |
| C | -1.75862238 | 3.77766199  | 7.50272817  |
| C | 4.15086244  | -0.36581934 | 7.50272817  |
| C | 2.39224006  | 3.41184265  | 7.50272817  |
| C | 1.75862238  | -3.77766199 | 7.50272817  |
| C | -4.15086244 | 0.36581934  | 7.50272817  |
| C | 1.76237403  | 3.78036438  | 6.25260321  |
| C | -4.15507861 | -0.36392151 | 6.25260321  |
| C | 2.39270458  | -3.41644287 | 6.25260321  |
| C | -1.76237403 | -3.78036438 | 6.25260321  |
| C | 4.15507861  | 0.36392151  | 6.25260321  |
| C | -2.39270458 | 3.41644287  | 6.25260321  |
| C | 3.78036438  | 1.76237403  | -6.25260321 |
| C | -0.36392151 | -4.15507861 | -6.25260321 |
| C | -3.41644287 | 2.39270458  | -6.25260321 |
| C | -3.78036438 | -1.76237403 | -6.25260321 |
| C | 0.36392151  | 4.15507861  | -6.25260321 |
| C | 3.41644287  | -2.39270458 | -6.25260321 |
| C | -1.76237403 | -3.78036438 | -6.25260321 |
| C | 4.15507861  | 0.36392151  | -6.25260321 |
| C | -2.39270458 | 3.41644287  | -6.25260321 |
| C | 1.76237403  | 3.78036438  | -6.25260321 |
| C | -4.15507861 | -0.36392151 | -6.25260321 |
| C | 2.39270458  | -3.41644287 | -6.25260321 |
| C | -3.78036438 | -1.76237403 | 6.25260321  |
| C | 0.36392151  | 4.15507861  | 6.25260321  |
| C | 3.41644287  | -2.39270458 | 6.25260321  |
| C | 3.78036438  | 1.76237403  | 6.25260321  |
| C | -0.36392151 | -4.15507861 | 6.25260321  |
| C | -3.41644287 | 2.39270458  | 6.25260321  |
| C | -0.36477807 | 4.15314927  | 5.00468873  |
| C | -3.41434373 | -2.39248171 | 5.00468873  |
| C | 3.77912181  | -1.76066755 | 5.00468873  |

|   |             |             |             |
|---|-------------|-------------|-------------|
| C | 0.36477807  | -4.15314927 | 5.00468873  |
| C | 3.41434373  | 2.39248171  | 5.00468873  |
| C | -3.77912181 | 1.76066755  | 5.00468873  |
| C | 4.15314927  | -0.36477807 | -5.00468873 |
| C | -2.39248171 | -3.41434373 | -5.00468873 |
| C | -1.76066755 | 3.77912181  | -5.00468873 |
| C | -4.15314927 | 0.36477807  | -5.00468873 |
| C | 2.39248171  | 3.41434373  | -5.00468873 |
| C | 1.76066755  | -3.77912181 | -5.00468873 |
| C | 0.36477807  | -4.15314927 | -5.00468873 |
| C | 3.41434373  | 2.39248171  | -5.00468873 |
| C | -3.77912181 | 1.76066755  | -5.00468873 |
| C | -0.36477807 | 4.15314927  | -5.00468873 |
| C | -3.41434373 | -2.39248171 | -5.00468873 |
| C | 3.77912181  | -1.76066755 | -5.00468873 |
| C | -4.15314927 | 0.36477807  | 5.00468873  |
| C | 2.39248171  | 3.41434373  | 5.00468873  |
| C | 1.76066755  | -3.77912181 | 5.00468873  |
| C | 4.15314927  | -0.36477807 | 5.00468873  |
| C | -2.39248171 | -3.41434373 | 5.00468873  |
| C | -1.76066755 | 3.77912181  | 5.00468873  |
| C | -2.39216687 | 3.41150722  | 3.75188098  |
| C | -1.75836848 | -3.77743089 | 3.75188098  |
| C | 4.15053535  | 0.36592367  | 3.75188098  |
| C | 2.39216687  | -3.41150722 | 3.75188098  |
| C | 1.75836848  | 3.77743089  | 3.75188098  |
| C | -4.15053535 | -0.36592367 | 3.75188098  |
| C | 3.41150722  | -2.39216687 | -3.75188098 |
| C | -3.77743089 | -1.75836848 | -3.75188098 |
| C | 0.36592367  | 4.15053535  | -3.75188098 |
| C | -3.41150722 | 2.39216687  | -3.75188098 |
| C | 3.77743089  | 1.75836848  | -3.75188098 |
| C | -0.36592367 | -4.15053535 | -3.75188098 |
| C | 2.39216687  | -3.41150722 | -3.75188098 |
| C | 1.75836848  | 3.77743089  | -3.75188098 |
| C | -4.15053535 | -0.36592367 | -3.75188098 |
| C | -2.39216687 | 3.41150722  | -3.75188098 |
| C | -1.75836848 | -3.77743089 | -3.75188098 |
| C | 4.15053535  | 0.36592367  | -3.75188098 |
| C | -3.41150722 | 2.39216687  | 3.75188098  |
| C | 3.77743089  | 1.75836848  | 3.75188098  |
| C | -0.36592367 | -4.15053535 | 3.75188098  |
| C | 3.41150722  | -2.39216687 | 3.75188098  |
| C | -3.77743089 | -1.75836848 | 3.75188098  |
| C | 0.36592367  | 4.15053535  | 3.75188098  |
| C | -3.78007314 | 1.76195550  | 2.50044730  |
| C | 0.36413835  | -4.15461712 | 2.50044730  |
| C | 3.41593480  | 2.39266162  | 2.50044730  |
| C | 3.78007314  | -1.76195550 | 2.50044730  |
| C | -0.36413835 | 4.15461712  | 2.50044730  |
| C | -3.41593480 | -2.39266162 | 2.50044730  |
| C | 1.76195550  | -3.78007314 | -2.50044730 |
| C | -4.15461712 | 0.36413835  | -2.50044730 |
| C | 2.39266162  | 3.41593480  | -2.50044730 |
| C | -1.76195550 | 3.78007314  | -2.50044730 |
| C | 4.15461712  | -0.36413835 | -2.50044730 |
| C | -2.39266162 | -3.41593480 | -2.50044730 |
| C | 3.78007314  | -1.76195550 | -2.50044730 |
| C | -0.36413835 | 4.15461712  | -2.50044730 |
| C | -3.41593480 | -2.39266162 | -2.50044730 |
| C | -3.78007314 | 1.76195550  | -2.50044730 |
| C | 0.36413835  | -4.15461712 | -2.50044730 |
| C | 3.41593480  | 2.39266162  | -2.50044730 |
| C | -1.76195550 | 3.78007314  | 2.50044730  |
| C | 4.15461712  | -0.36413835 | 2.50044730  |
| C | -2.39266162 | -3.41593480 | 2.50044730  |
| C | 1.76195550  | -3.78007314 | 2.50044730  |
| C | -4.15461712 | 0.36413835  | 2.50044730  |
| C | 2.39266162  | 3.41593480  | 2.50044730  |
| C | -4.15394277 | -0.36445385 | 1.25242995  |

|   |             |             |             |
|---|-------------|-------------|-------------|
| C | 2.39259768  | -3.41519304 | 1.25242995  |
| C | 1.76134509  | 3.77964689  | 1.25242995  |
| C | 4.15394277  | 0.36445385  | 1.25242995  |
| C | -2.39259768 | 3.41519304  | 1.25242995  |
| C | -1.76134509 | -3.77964689 | 1.25242995  |
| C | -0.36445385 | -4.15394277 | -1.25242995 |
| C | -3.41519304 | 2.39259768  | -1.25242995 |
| C | 3.77964689  | 1.76134509  | -1.25242995 |
| C | 0.36445385  | 4.15394277  | -1.25242995 |
| C | 3.41519304  | -2.39259768 | -1.25242995 |
| C | -3.77964689 | -1.76134509 | -1.25242995 |
| C | 4.15394277  | 0.36445385  | -1.25242995 |
| C | -2.39259768 | 3.41519304  | -1.25242995 |
| C | -1.76134509 | -3.77964689 | -1.25242995 |
| C | -4.15394277 | -0.36445385 | -1.25242995 |
| C | 2.39259768  | -3.41519304 | -1.25242995 |
| C | 1.76134509  | 3.77964689  | -1.25242995 |
| C | 0.36445385  | 4.15394277  | 1.25242995  |
| C | 3.41519304  | -2.39259768 | 1.25242995  |
| C | -3.77964689 | -1.76134509 | 1.25242995  |
| C | -0.36445385 | -4.15394277 | 1.25242995  |
| C | -3.41519304 | 2.39259768  | 1.25242995  |
| C | 3.77964689  | 1.76134509  | 1.25242995  |
| C | -3.41138513 | -2.39220576 | 0.00000000  |
| C | 3.77740353  | -1.75824331 | 0.00000000  |
| C | -0.36601839 | 4.15044907  | 0.00000000  |
| C | 3.41138513  | 2.39220576  | 0.00000000  |
| C | -3.77740353 | 1.75824331  | 0.00000000  |
| C | 0.36601839  | -4.15044907 | 0.00000000  |
| C | -2.39220576 | -3.41138513 | 0.00000000  |
| C | -1.75824331 | 3.77740353  | 0.00000000  |
| C | 4.15044907  | -0.36601839 | 0.00000000  |
| C | 2.39220576  | 3.41138513  | 0.00000000  |
| C | 1.75824331  | -3.77740353 | 0.00000000  |
| C | -4.15044907 | 0.36601839  | 0.00000000  |

Nanotube (7,5) u05v00  
B3LYP/STO-3G Energy: -4531.654068

|   |           |           |           |
|---|-----------|-----------|-----------|
| 6 | -6.485553 | -0.949155 | -3.570396 |
| 6 | -6.318427 | -2.218303 | -3.066340 |
| 6 | -5.682343 | 2.874638  | 3.549197  |
| 6 | -5.643581 | 3.732305  | 2.472528  |
| 6 | -5.824029 | -4.060775 | -0.732278 |
| 6 | -5.572902 | -4.286560 | 0.608582  |
| 6 | -5.585081 | 4.207656  | -0.505183 |
| 6 | -5.557622 | 3.735991  | -1.807782 |
| 6 | -5.043805 | -3.182376 | 3.365618  |
| 6 | -4.840800 | -2.115339 | 4.230650  |
| 6 | -5.436361 | 1.339640  | -3.601157 |
| 6 | -5.334123 | -0.070513 | -3.756782 |
| 6 | -4.551256 | 0.854625  | 4.542840  |
| 6 | -4.483447 | 2.154880  | 3.964888  |
| 6 | -4.992565 | -2.735316 | -2.743859 |
| 6 | -4.760368 | -3.657065 | -1.631711 |
| 6 | -4.405158 | 3.973838  | 1.742864  |
| 6 | -4.383239 | 4.231599  | 0.299645  |
| 6 | -4.236281 | -4.157491 | 1.151338  |
| 6 | -3.980481 | -3.654319 | 2.511481  |
| 6 | -4.326879 | 3.281561  | -2.412332 |
| 6 | -4.281444 | 2.130895  | -3.350537 |
| 6 | -3.557163 | -1.466827 | 4.327933  |
| 6 | -3.418114 | -0.001853 | 4.546780  |
| 6 | -4.027906 | -0.685174 | -3.785302 |
| 6 | -3.862798 | -2.044130 | -3.298792 |
| 6 | -3.214197 | 2.649553  | 3.488282  |
| 6 | -3.178904 | 3.588552  | 2.380691  |
| 6 | -3.410678 | -3.886847 | -1.188014 |

|   |           |           |           |
|---|-----------|-----------|-----------|
| 6 | -3.149616 | -4.162953 | 0.214798  |
| 6 | -3.129929 | 4.143722  | -0.403397 |
| 6 | -3.105434 | 3.684096  | -1.780906 |
| 6 | -2.643037 | -3.263409 | 2.863471  |
| 6 | -2.428698 | -2.177571 | 3.801131  |
| 6 | -2.984848 | 1.559623  | -3.666505 |
| 6 | -2.867217 | 0.153089  | -3.941877 |
| 6 | -2.111991 | 0.597637  | 4.336372  |
| 6 | -2.010349 | 1.949745  | 3.859272  |
| 6 | -2.518922 | -2.544714 | -3.072680 |
| 6 | -2.294439 | -3.502546 | -2.035177 |
| 6 | -1.905027 | 3.855714  | 1.734420  |
| 6 | -1.880636 | 4.170694  | 0.339687  |
| 6 | -1.776569 | -4.118682 | 0.698933  |
| 6 | -1.521716 | -3.702778 | 2.043774  |
| 6 | -1.820411 | 3.342081  | -2.387258 |
| 6 | -1.767560 | 2.304723  | -3.376469 |
| 6 | -1.081813 | -1.630601 | 3.952416  |
| 6 | -0.922702 | -0.241110 | 4.275517  |
| 6 | -1.547273 | -0.460903 | -4.034269 |
| 6 | -1.381816 | -1.837058 | -3.638331 |
| 6 | -0.717413 | 2.476110  | 3.437243  |
| 6 | -0.669421 | 3.470457  | 2.392725  |
| 6 | -0.933369 | -3.805712 | -1.625413 |
| 6 | -0.676272 | -4.158218 | -0.244208 |
| 6 | -0.614167 | 4.170538  | -0.370262 |
| 6 | -0.592679 | 3.782923  | -1.769325 |
| 6 | -0.165918 | -3.397879 | 2.453443  |
| 6 | 0.053656  | -2.367921 | 3.455609  |
| 6 | -0.485606 | 1.771671  | -3.783439 |
| 6 | -0.382149 | 0.371386  | -4.165482 |
| 6 | 0.382145  | 0.371055  | 4.165507  |
| 6 | 0.485602  | 1.771368  | 3.783576  |
| 6 | -0.053655 | -2.367644 | -3.455797 |
| 6 | 0.165922  | -3.397681 | -2.453711 |
| 6 | 0.592678  | 3.782779  | 1.769620  |
| 6 | 0.614167  | 4.170505  | 0.370589  |
| 6 | 0.676278  | -4.158236 | 0.243879  |
| 6 | 0.933374  | -3.805843 | 1.625113  |
| 6 | 0.669420  | 3.470648  | -2.392455 |
| 6 | 0.717409  | 2.476384  | -3.437051 |
| 6 | 1.381816  | -1.837348 | 3.638188  |
| 6 | 1.547271  | -0.461224 | 4.034235  |
| 6 | 0.922698  | -0.240769 | -4.275539 |
| 6 | 1.081813  | -1.630284 | -3.952544 |
| 6 | 1.767556  | 2.304454  | 3.376650  |
| 6 | 1.820409  | 3.341888  | 2.387519  |
| 6 | 1.521720  | -3.702609 | -2.044066 |
| 6 | 1.776575  | -4.118622 | -0.699258 |
| 6 | 1.880636  | 4.170716  | -0.339360 |
| 6 | 1.905026  | 3.855851  | -1.734120 |
| 6 | 2.294442  | -3.502705 | 2.034902  |
| 6 | 2.518922  | -2.544957 | 3.072481  |
| 6 | 2.010346  | 1.950054  | -3.859125 |
| 6 | 2.111987  | 0.597985  | -4.336331 |
| 6 | 2.867213  | 0.152779  | 3.941892  |
| 6 | 2.984844  | 1.559331  | 3.666630  |
| 6 | 2.428699  | -2.177263 | -3.801304 |
| 6 | 2.643041  | -3.263175 | -2.863727 |
| 6 | 3.105433  | 3.683949  | 1.781194  |
| 6 | 3.129930  | 4.143683  | 0.403721  |
| 6 | 3.149621  | -4.162929 | -0.215128 |
| 6 | 3.410683  | -3.886937 | 1.187708  |
| 6 | 3.178903  | 3.588740  | -2.380412 |
| 6 | 3.214194  | 2.649833  | -3.488081 |
| 6 | 3.862799  | -2.044390 | 3.298636  |
| 6 | 4.027904  | -0.685473 | 3.785257  |
| 6 | 3.418111  | -0.001487 | -4.546789 |
| 6 | 3.557162  | -1.466478 | -4.328053 |
| 6 | 4.281441  | 2.130629  | 3.350711  |

|   |           |           |           |
|---|-----------|-----------|-----------|
| 6 | 4.326878  | 3.281365  | 2.412590  |
| 6 | 3.980486  | -3.654110 | -2.511771 |
| 6 | 4.236287  | -4.157388 | -1.151665 |
| 6 | 4.383240  | 4.231616  | -0.299313 |
| 6 | 4.405158  | 3.973973  | -1.742556 |
| 6 | 4.760371  | -3.657191 | 1.631426  |
| 6 | 4.992567  | -2.735534 | 2.743655  |
| 6 | 4.483444  | 2.155201  | -3.964730 |
| 6 | 4.551252  | 0.854989  | -4.542782 |
| 6 | 5.334120  | -0.070807 | 3.756794  |
| 6 | 5.436357  | 1.339357  | 3.601277  |
| 6 | 4.840798  | -2.114998 | -4.230826 |
| 6 | 5.043808  | -3.182099 | -3.365873 |
| 6 | 5.557619  | 3.735843  | 1.808077  |
| 6 | 5.585079  | 4.207608  | 0.505514  |
| 6 | 5.572909  | -4.286496 | -0.608919 |
| 6 | 5.824035  | -4.060822 | 0.731961  |
| 6 | 5.643581  | 3.732498  | -2.472239 |
| 6 | 5.682339  | 2.874921  | -3.548980 |
| 6 | 6.318428  | -2.218548 | 3.066186  |
| 6 | 6.485552  | -0.949434 | 3.570346  |
| 1 | -7.493842 | -0.535153 | -3.709669 |
| 1 | -7.200734 | -2.818279 | -2.808556 |
| 1 | -6.641560 | 2.620459  | 4.021281  |
| 1 | -6.578610 | 4.163577  | 2.092194  |
| 1 | -6.861946 | -4.053402 | -1.088850 |
| 1 | -6.416436 | -4.453393 | 1.290877  |
| 1 | -6.552834 | 4.429162  | -0.037597 |
| 1 | -6.505427 | 3.593686  | -2.343018 |
| 1 | -6.061603 | -3.568272 | 3.225899  |
| 1 | -5.704270 | -1.683787 | 4.753380  |
| 1 | -6.434323 | 1.764196  | -3.433637 |
| 1 | -5.545731 | 0.443821  | 4.759173  |
| 1 | 5.545724  | 0.444202  | -4.759146 |
| 1 | 6.434318  | 1.763928  | 3.433796  |
| 1 | 5.704265  | -1.683411 | -4.753531 |
| 1 | 6.061611  | -3.568008 | -3.226186 |
| 1 | 6.505423  | 3.593500  | 2.343303  |
| 1 | 6.552836  | 4.429151  | 0.037947  |
| 1 | 6.416442  | -4.453269 | -1.291227 |
| 1 | 6.861950  | -4.053477 | 1.088535  |
| 1 | 6.578609  | 4.163734  | -2.091866 |
| 1 | 6.641554  | 2.620783  | -4.021085 |
| 1 | 7.200733  | -2.818508 | 2.808363  |
| 1 | 7.493833  | -0.535442 | 3.709663  |

Nanotube (7,5) u05v01  
B3LYP/STO-3G Energy: -4606.949986

|   |           |           |           |
|---|-----------|-----------|-----------|
| 6 | -6.267844 | 0.076868  | -4.141242 |
| 6 | -6.134861 | -1.280793 | -3.968162 |
| 6 | -6.075656 | 1.941108  | 3.754883  |
| 6 | -5.956628 | 3.046211  | 2.942855  |
| 6 | -5.824377 | -3.669196 | -2.154647 |
| 6 | -5.683220 | -4.235213 | -0.902014 |
| 6 | -5.661740 | 4.268487  | 0.201435  |
| 6 | -5.524478 | 4.144322  | -1.170813 |
| 6 | -5.386814 | -3.878339 | 2.079113  |
| 6 | -5.260252 | -3.069466 | 3.199289  |
| 6 | -5.236048 | 2.281670  | -3.498532 |
| 6 | -5.110716 | 0.957669  | -3.997993 |
| 6 | -5.014254 | -0.282163 | 4.280803  |
| 6 | -4.908654 | 1.120859  | 4.063984  |
| 6 | -4.836565 | -1.883307 | -3.679707 |
| 6 | -4.691758 | -3.062932 | -2.830480 |
| 6 | -4.664648 | 3.450450  | 2.400749  |
| 6 | -4.528349 | 4.070952  | 1.080606  |
| 6 | -4.395321 | -4.270562 | -0.237564 |

|   |           |           |           |
|---|-----------|-----------|-----------|
| 6 | -4.254158 | -4.134539 | 1.219926  |
| 6 | -4.243371 | 3.843941  | -1.769984 |
| 6 | -4.110713 | 2.968572  | -2.960526 |
| 6 | -3.991064 | -2.485846 | 3.560057  |
| 6 | -3.878909 | -1.127706 | 4.154715  |
| 6 | -3.801401 | 0.351439  | -4.074072 |
| 6 | -3.668204 | -1.088842 | -3.942632 |
| 6 | -3.608257 | 1.703714  | 3.833625  |
| 6 | -3.490744 | 2.897047  | 3.013668  |
| 6 | -3.381235 | -3.423098 | -2.354634 |
| 6 | -3.235117 | -4.056145 | -1.054443 |
| 6 | -3.221684 | 4.153483  | 0.482363  |
| 6 | -3.081138 | 4.061353  | -0.960831 |
| 6 | -2.951502 | -3.868281 | 1.766540  |
| 6 | -2.820158 | -3.057448 | 2.962961  |
| 6 | -2.788452 | 2.478573  | -3.302998 |
| 6 | -2.638024 | 1.184757  | -3.914458 |
| 6 | -2.564383 | -0.513121 | 4.208514  |
| 6 | -2.433582 | 0.914768  | 4.104583  |
| 6 | -2.345497 | -1.651473 | -3.744656 |
| 6 | -2.201621 | -2.850744 | -2.978861 |
| 6 | -2.171545 | 3.305254  | 2.562731  |
| 6 | -2.037285 | 3.971613  | 1.305032  |
| 6 | -1.907468 | -4.160405 | -0.466452 |
| 6 | -1.765827 | -4.103489 | 0.955243  |
| 6 | -1.748935 | 3.869042  | -1.528093 |
| 6 | -1.605732 | 3.111446  | -2.735489 |
| 6 | -1.493143 | -2.585187 | 3.353188  |
| 6 | -1.368762 | -1.325637 | 4.028572  |
| 6 | -1.310990 | 0.594721  | -4.046325 |
| 6 | -1.169754 | -0.837138 | -4.007306 |
| 6 | -1.114111 | 1.513375  | 3.935448  |
| 6 | -0.989251 | 2.744009  | 3.193952  |
| 6 | -0.876829 | -3.273114 | -2.552593 |
| 6 | -0.732469 | -3.974741 | -1.297618 |
| 6 | -0.716895 | 4.140310  | 0.723418  |
| 6 | -0.577599 | 4.127349  | -0.720325 |
| 6 | -0.447739 | -3.932984 | 1.536317  |
| 6 | -0.316424 | -3.190904 | 2.778524  |
| 6 | -0.287742 | 2.680628  | -3.155878 |
| 6 | -0.143520 | 1.418749  | -3.861085 |
| 6 | -0.062410 | -0.724302 | 4.181391  |
| 6 | 0.062417  | 0.725407  | 4.181201  |
| 6 | 0.143524  | -1.419771 | -3.860711 |
| 6 | 0.287742  | -2.681466 | -3.155173 |
| 6 | 0.316424  | 3.191640  | 2.777683  |
| 6 | 0.447735  | 3.933393  | 1.535278  |
| 6 | 0.577592  | -4.127544 | -0.719237 |
| 6 | 0.716889  | -4.140122 | 0.724510  |
| 6 | 0.732464  | 3.974398  | -1.298666 |
| 6 | 0.876827  | 3.272440  | -2.553455 |
| 6 | 0.989253  | -2.743165 | 3.194672  |
| 6 | 1.114117  | -1.512334 | 3.935841  |
| 6 | 1.169758  | 0.836078  | -4.007520 |
| 6 | 1.310994  | -0.595793 | -4.046164 |
| 6 | 1.368768  | 1.326702  | 4.028216  |
| 6 | 1.493145  | 2.586076  | 3.352502  |
| 6 | 1.605731  | -3.112176 | -2.734668 |
| 6 | 1.748930  | -3.869455 | -1.527073 |
| 6 | 1.765821  | 4.103750  | 0.954160  |
| 6 | 1.907462  | 4.160291  | -0.467550 |
| 6 | 2.037281  | -3.971276 | 1.306078  |
| 6 | 2.171545  | -3.304580 | 2.563598  |
| 6 | 2.201620  | 2.849957  | -2.979607 |
| 6 | 2.345500  | 1.650481  | -3.745079 |
| 6 | 2.433589  | -0.913683 | 4.104811  |
| 6 | 2.564390  | 0.514234  | 4.208367  |
| 6 | 2.638028  | -1.185793 | -3.914133 |
| 6 | 2.788453  | -2.479452 | -3.302341 |
| 6 | 2.820158  | 3.058238  | 2.962150  |

|   |           |           |           |
|---|-----------|-----------|-----------|
| 6 | 2.951497  | 3.868763  | 1.765519  |
| 6 | 3.081132  | -4.061625 | -0.959762 |
| 6 | 3.221678  | -4.153371 | 0.483457  |
| 6 | 3.235111  | 4.055879  | -1.055513 |
| 6 | 3.381232  | 3.422482  | -2.355532 |
| 6 | 3.490746  | -2.896254 | 3.014423  |
| 6 | 3.608263  | -1.702701 | 3.834058  |
| 6 | 3.668210  | 1.087798  | -3.942899 |
| 6 | 3.801406  | -0.352518 | -4.073958 |
| 6 | 3.878916  | 1.128805  | 4.154398  |
| 6 | 3.991067  | 2.486795  | 3.559392  |
| 6 | 4.110712  | -2.969366 | -2.959739 |
| 6 | 4.243366  | -3.844429 | -1.768972 |
| 6 | 4.254152  | 4.134883  | 1.218835  |
| 6 | 4.395314  | 4.270522  | -0.238692 |
| 6 | 4.528343  | -4.070687 | 1.081677  |
| 6 | 4.664647  | -3.449825 | 2.401649  |
| 6 | 4.691758  | 3.062194  | -2.831280 |
| 6 | 4.836569  | 1.882334  | -3.680182 |
| 6 | 4.908661  | -1.119784 | 4.064255  |
| 6 | 5.014262  | 0.283296  | 4.280699  |
| 6 | 5.110721  | -0.958729 | -3.997718 |
| 6 | 5.236049  | -2.282604 | -3.497921 |
| 6 | 5.260253  | 3.070327  | 3.198472  |
| 6 | 5.386809  | 3.878916  | 2.078090  |
| 6 | 5.524473  | -4.144662 | -1.169724 |
| 6 | 5.661734  | -4.268466 | 0.202558  |
| 6 | 5.683213  | 4.235003  | -0.903133 |
| 6 | 5.824373  | 3.668650  | -2.155612 |
| 6 | 5.956631  | -3.045436 | 2.943637  |
| 6 | 6.075663  | -1.940113 | 3.755363  |
| 6 | 6.134865  | 1.279742  | -3.968468 |
| 6 | 6.267848  | -0.077965 | -4.141190 |
| 1 | -7.263379 | 0.527799  | -4.255146 |
| 1 | -7.031029 | -1.914402 | -3.949657 |
| 1 | -7.067644 | 1.587809  | 4.069025  |
| 1 | -6.860738 | 3.575087  | 2.614491  |
| 1 | -6.829085 | -3.555249 | -2.581357 |
| 1 | -6.578519 | -4.559902 | -0.356155 |
| 1 | -6.665857 | 4.376351  | 0.630857  |
| 1 | -6.423893 | 4.155837  | -1.800072 |
| 1 | -6.387407 | -4.202204 | 1.765587  |
| 1 | -6.164879 | -2.772849 | 3.745820  |
| 1 | -6.247253 | 2.665342  | -3.313209 |
| 1 | -6.019963 | -0.720603 | 4.306113  |
| 1 | 6.019974  | 0.721741  | 4.305883  |
| 1 | 6.247250  | -2.666235 | -3.312510 |
| 1 | 6.164881  | 2.773853  | 3.745078  |
| 1 | 6.387393  | 4.202705  | 1.764483  |
| 1 | 6.423885  | -4.156348 | -1.798982 |
| 1 | 6.665847  | -4.376223 | 0.632008  |
| 1 | 6.578512  | 4.559846  | -0.357362 |
| 1 | 6.829082  | 3.554598  | -2.582293 |
| 1 | 6.860739  | -3.574398 | 2.615409  |
| 1 | 7.067654  | -1.586721 | 4.069397  |
| 1 | 7.031035  | 1.913353  | -3.950125 |
| 1 | 7.263385  | -0.528926 | -4.254971 |

Nanotube (7,5) u05v02  
B3LYP/STO-3G Energy: -4682.245478

|   |           |           |           |
|---|-----------|-----------|-----------|
| 6 | -6.632703 | -3.584016 | -1.174573 |
| 6 | -6.520437 | -3.772336 | 0.182259  |
| 6 | -5.869529 | 4.487419  | -0.949062 |
| 6 | -5.778303 | 3.979537  | -2.224467 |
| 6 | -6.150162 | -2.656659 | 2.958172  |
| 6 | -5.942047 | -1.605134 | 3.828992  |
| 6 | -5.640386 | 1.629164  | -4.109543 |

|   |           |           |           |
|---|-----------|-----------|-----------|
| 6 | -5.598815 | 0.265720  | -4.342100 |
| 6 | -5.443264 | 1.339666  | 4.252097  |
| 6 | -5.222497 | 2.616112  | 3.758068  |
| 6 | -5.509728 | -2.474042 | -3.135360 |
| 6 | -5.447944 | -3.299988 | -1.982915 |
| 6 | -4.831834 | 4.349661  | 1.341969  |
| 6 | -4.705189 | 4.488918  | -0.067405 |
| 6 | -5.219910 | -3.736146 | 0.846814  |
| 6 | -5.048609 | -3.230274 | 2.204963  |
| 6 | -4.516137 | 3.465451  | -2.745621 |
| 6 | -4.454394 | 2.345519  | -3.684808 |
| 6 | -4.614075 | -1.062771 | 4.044183  |
| 6 | -4.375065 | 0.365975  | 4.290246  |
| 6 | -4.367196 | -0.480302 | -4.199294 |
| 6 | -4.334485 | -1.859107 | -3.657270 |
| 6 | -3.915904 | 3.024105  | 3.297786  |
| 6 | -3.728453 | 3.931983  | 2.137368  |
| 6 | -4.160209 | -3.618910 | -1.408363 |
| 6 | -4.052485 | -3.867705 | 0.018586  |
| 6 | -3.408250 | 4.320631  | -0.680627 |
| 6 | -3.316678 | 3.828845  | -2.044112 |
| 6 | -3.718934 | -2.955286 | 2.685175  |
| 6 | -3.504413 | -1.875902 | 3.635139  |
| 6 | -3.188837 | 1.697842  | -3.914608 |
| 6 | -3.148271 | 0.273220  | -4.198362 |
| 6 | -3.033245 | 0.870585  | 4.187879  |
| 6 | -2.802339 | 2.222672  | 3.711994  |
| 6 | -3.049951 | -2.407714 | -3.264627 |
| 6 | -2.970368 | -3.335230 | -2.166712 |
| 6 | -2.398408 | 4.044906  | 1.567140  |
| 6 | -2.238711 | 4.295130  | 0.159681  |
| 6 | -2.733710 | -3.910671 | 0.621378  |
| 6 | -2.569036 | -3.489681 | 1.978296  |
| 6 | -2.022297 | 3.404716  | -2.546748 |
| 6 | -1.956810 | 2.357839  | -3.518586 |
| 6 | -2.144920 | -1.428319 | 3.898444  |
| 6 | -1.909835 | -0.054513 | 4.214926  |
| 6 | -1.862825 | -0.417303 | -4.152189 |
| 6 | -1.818293 | -1.783197 | -3.726456 |
| 6 | -1.441311 | 2.625907  | 3.366591  |
| 6 | -1.239270 | 3.581517  | 2.318442  |
| 6 | -1.668578 | -3.702617 | -1.620964 |
| 6 | -1.558301 | -4.036370 | -0.226119 |
| 6 | -0.919602 | 4.184114  | -0.452445 |
| 6 | -0.814246 | 3.778246  | -1.830096 |
| 6 | -1.229236 | -3.277992 | 2.504847  |
| 6 | -1.021090 | -2.262277 | 3.510171  |
| 6 | -0.674474 | 1.746326  | -3.826803 |
| 6 | -0.632887 | 0.345839  | -4.188916 |
| 6 | -0.551823 | 0.457799  | 4.213664  |
| 6 | -0.319216 | 1.835622  | 3.820452  |
| 6 | -0.539936 | -2.391107 | -3.409736 |
| 6 | -0.472261 | -3.398048 | -2.365407 |
| 6 | 0.091961  | 3.785688  | 1.785573  |
| 6 | 0.251743  | 4.133386  | 0.383928  |
| 6 | -0.251740 | -4.133490 | 0.382835  |
| 6 | -0.091960 | -3.786161 | 1.784573  |
| 6 | 0.472263  | 3.398673  | -2.364508 |
| 6 | 0.539936  | 2.392010  | -3.409105 |
| 6 | 0.319212  | -1.836633 | 3.819968  |
| 6 | 0.551817  | -0.458914 | 4.213543  |
| 6 | 0.632885  | -0.344730 | -4.189008 |
| 6 | 0.674473  | -1.745312 | -3.827266 |
| 6 | 1.021087  | 2.261347  | 3.510772  |
| 6 | 1.229236  | 3.277327  | 2.505715  |
| 6 | 0.814250  | -3.777760 | -1.831095 |
| 6 | 0.919606  | -4.183991 | -0.453552 |
| 6 | 1.558305  | 4.036425  | -0.225050 |
| 6 | 1.668581  | 3.703042  | -1.619984 |
| 6 | 1.239271  | -3.582130 | 2.317495  |



|   |           |           |           |
|---|-----------|-----------|-----------|
| 6 | 1.441308  | -2.626798 | 3.365899  |
| 6 | 1.818292  | 1.784183  | -3.725987 |
| 6 | 1.862823  | 0.418403  | -4.152084 |
| 6 | 1.909830  | 0.053397  | 4.214948  |
| 6 | 2.144917  | 1.427287  | 3.898828  |
| 6 | 1.956811  | -2.356905 | -3.519211 |
| 6 | 2.022300  | -3.404037 | -2.547649 |
| 6 | 2.569037  | 3.489153  | 1.979222  |
| 6 | 2.733712  | 3.910498  | 0.622414  |
| 6 | 2.238716  | -4.295166 | 0.158546  |
| 6 | 2.398410  | -4.045316 | 1.566072  |
| 6 | 2.970369  | 3.335800  | -2.165830 |
| 6 | 3.049951  | 2.408576  | -3.263994 |
| 6 | 2.802334  | -2.223653 | 3.711413  |
| 6 | 3.033239  | -0.871695 | 4.187658  |
| 6 | 3.148269  | -0.272108 | -4.198443 |
| 6 | 3.188837  | -1.696804 | -3.915063 |
| 6 | 3.504409  | 1.874938  | 3.635642  |
| 6 | 3.718934  | 2.954569  | 2.685960  |
| 6 | 3.316682  | -3.828295 | -2.045124 |
| 6 | 3.408255  | -4.320441 | -0.681769 |
| 6 | 4.052487  | 3.867687  | 0.019611  |
| 6 | 4.160211  | 3.619272  | -1.407403 |
| 6 | 3.728455  | -3.932540 | 2.136331  |
| 6 | 3.915903  | -3.024973 | 3.296993  |
| 6 | 4.334484  | 1.860073  | -3.656785 |
| 6 | 4.367193  | 0.481416  | -4.199178 |
| 6 | 4.375059  | -0.367112 | 4.290163  |
| 6 | 4.614070  | 1.061697  | 4.044476  |
| 6 | 4.454394  | -2.344538 | -3.685434 |
| 6 | 4.516140  | -3.464714 | -2.746536 |
| 6 | 5.048611  | 3.229679  | 2.205818  |
| 6 | 5.219913  | 3.735905  | 0.847803  |
| 6 | 4.705195  | -4.488882 | -0.068590 |
| 6 | 4.831839  | -4.349999 | 1.340821  |
| 6 | 5.447945  | 3.300502  | -1.982043 |
| 6 | 5.509727  | 2.474872  | -3.134713 |
| 6 | 5.222491  | -2.617106 | 3.757394  |
| 6 | 5.443257  | -1.340793 | 4.251764  |
| 6 | 5.598812  | -0.264567 | -4.342185 |
| 6 | 5.640385  | -1.628072 | -4.109989 |
| 6 | 5.942043  | 1.604112  | 3.829425  |
| 6 | 6.150162  | 2.655862  | 2.958877  |
| 6 | 5.778308  | -3.978930 | -2.225517 |
| 6 | 5.869535  | -4.487145 | -0.950246 |
| 6 | 6.520439  | 3.772269  | 0.183257  |
| 6 | 6.632704  | 3.584313  | -1.173625 |
| 1 | -7.622720 | -3.512060 | -1.646130 |
| 1 | -7.427820 | -3.856689 | 0.794255  |
| 1 | -6.845977 | 4.774250  | -0.534187 |
| 1 | -6.688436 | 3.866586  | -2.827743 |
| 1 | -7.177226 | -2.970599 | 2.731506  |
| 1 | -6.807340 | -1.101144 | 4.278731  |
| 1 | -6.610260 | 2.143021  | -4.109121 |
| 1 | -6.537579 | -0.274439 | -4.521132 |
| 1 | -6.470361 | 1.024185  | 4.476487  |
| 1 | -6.080779 | 3.282800  | 3.603256  |
| 1 | -6.497223 | -2.127565 | -3.465538 |
| 1 | -5.844070 | 4.336999  | 1.765762  |
| 1 | 5.844077  | -4.337434 | 1.764615  |
| 1 | 6.497219  | 2.128497  | -3.464998 |
| 1 | 6.080776  | -3.283751 | 3.602406  |
| 1 | 6.470355  | -1.025375 | 4.476249  |
| 1 | 6.537577  | 0.275641  | -4.521079 |
| 1 | 6.610259  | -2.141930 | -4.109706 |
| 1 | 6.807335  | 1.100000  | 4.279029  |
| 1 | 7.177226  | 2.969852  | 2.732286  |
| 1 | 6.688441  | -3.865818 | -2.828761 |
| 1 | 6.845986  | -4.774082 | -0.535448 |
| 1 | 7.427823  | 3.856456  | 0.795275  |

1 7.622722 3.512483 -1.645202

Nanotube (7,5) u05v03  
B3LYP/STO-3G Energy: -4757.540481

|   |          |           |           |
|---|----------|-----------|-----------|
| 6 | 6.555999 | -3.539303 | 1.940489  |
| 6 | 6.380553 | -4.059388 | 0.681034  |
| 6 | 6.258882 | 4.235347  | -0.345966 |
| 6 | 6.183604 | 4.077570  | 1.018010  |
| 6 | 5.971821 | -3.669533 | -2.280035 |
| 6 | 5.794953 | -2.865995 | -3.388287 |
| 6 | 5.978049 | 2.304714  | 3.449094  |
| 6 | 5.866758 | 1.053818  | 4.028138  |
| 6 | 5.459677 | -0.101945 | -4.549959 |
| 6 | 5.334160 | 1.269580  | -4.399440 |
| 6 | 5.575378 | -1.892440 | 3.572676  |
| 6 | 5.421592 | -2.978609 | 2.674686  |
| 6 | 5.134104 | 3.585338  | -2.503568 |
| 6 | 5.065561 | 4.086265  | -1.176219 |
| 6 | 5.059279 | -4.104934 | 0.057407  |
| 6 | 4.866748 | -3.952201 | -1.379179 |
| 6 | 4.912319 | 3.795974  | 1.678507  |
| 6 | 4.819826 | 2.962661  | 2.875618  |
| 6 | 4.494442 | -2.306371 | -3.708212 |
| 6 | 4.333275 | -0.978979 | -4.312659 |
| 6 | 4.588885 | 0.377473  | 4.109003  |
| 6 | 4.456841 | -1.088135 | 3.945092  |
| 6 | 4.070685 | 1.869655  | -4.035295 |
| 6 | 3.979173 | 3.052824  | -3.144960 |
| 6 | 4.095647 | -3.349025 | 2.230741  |
| 6 | 3.918166 | -3.943731 | 0.918038  |
| 6 | 3.782948 | 4.165688  | -0.515045 |
| 6 | 3.711496 | 4.045162  | 0.930590  |
| 6 | 3.538043 | -3.718845 | -1.885513 |
| 6 | 3.353293 | -2.908923 | -3.078521 |
| 6 | 3.528135 | 2.480243  | 3.291555  |
| 6 | 3.416211 | 1.183239  | 3.938127  |
| 6 | 3.028373 | -0.375714 | -4.321673 |
| 6 | 2.896690 | 1.066133  | -4.209822 |
| 6 | 3.129936 | -1.635081 | 3.738629  |
| 6 | 2.954912 | -2.806067 | 2.918940  |
| 6 | 2.679756 | 3.396508  | -2.597974 |
| 6 | 2.585433 | 4.005021  | -1.297568 |
| 6 | 2.577449 | -4.048538 | 0.375803  |
| 6 | 2.386520 | -3.973862 | -1.040197 |
| 6 | 2.413914 | 3.848055  | 1.550484  |
| 6 | 2.322970 | 3.092879  | 2.761145  |
| 6 | 2.015350 | -2.453048 | -3.421314 |
| 6 | 1.851551 | -1.197184 | -4.083777 |
| 6 | 2.092956 | 0.589432  | 4.099948  |
| 6 | 1.954435 | -0.833253 | 4.048203  |
| 6 | 1.576351 | 1.635254  | -3.955149 |
| 6 | 1.469428 | 2.836099  | -3.183673 |
| 6 | 1.614505 | -3.214235 | 2.515291  |
| 6 | 1.430466 | -3.877277 | 1.254383  |
| 6 | 1.284382 | 4.138364  | -0.651385 |
| 6 | 1.204363 | 4.102805  | 0.784974  |
| 6 | 1.042764 | -3.808092 | -1.573144 |
| 6 | 0.858368 | -3.076150 | -2.801715 |
| 6 | 1.018670 | 2.665513  | 3.242419  |
| 6 | 0.909758 | 1.414558  | 3.959837  |
| 6 | 0.527029 | -0.610675 | -4.191717 |
| 6 | 0.391991 | 0.831191  | -4.169174 |
| 6 | 0.631704 | -1.418789 | 3.930740  |
| 6 | 0.465785 | -2.654212 | 3.187508  |
| 6 | 0.170996 | 3.257764  | -2.695316 |
| 6 | 0.082624 | 3.956207  | -1.424862 |
| 6 | 0.095608 | -4.036181 | 0.719776  |

|   |           |           |           |
|---|-----------|-----------|-----------|
| 6 | -0.095623 | -4.036340 | -0.718898 |
| 6 | -0.082643 | 3.956522  | 1.424006  |
| 6 | -0.171001 | 3.258359  | 2.694614  |
| 6 | -0.465780 | -2.654915 | -3.186938 |
| 6 | -0.631687 | -1.419654 | -3.930442 |
| 6 | -0.391970 | 0.832107  | 4.169004  |
| 6 | -0.527008 | -0.609755 | 4.191858  |
| 6 | -0.909742 | 1.413685  | -3.960152 |
| 6 | -1.018667 | 2.664792  | -3.243001 |
| 6 | -0.858368 | -3.075525 | 2.802385  |
| 6 | -1.042776 | -3.807729 | 1.573972  |
| 6 | -1.204385 | 4.102610  | -0.785862 |
| 6 | -1.284405 | 4.138486  | 0.650488  |
| 6 | -1.430478 | -3.877538 | -1.253542 |
| 6 | -1.614507 | -3.214781 | -2.514601 |
| 6 | -1.469427 | 2.836794  | 3.183073  |
| 6 | -1.576334 | 1.636122  | 3.954820  |
| 6 | -1.954416 | -0.834145 | -4.048053 |
| 6 | -2.092937 | 0.588529  | -4.100107 |
| 6 | -1.851532 | -1.196286 | 4.084062  |
| 6 | -2.015342 | -2.452286 | 3.421859  |
| 6 | -2.322973 | 3.092251  | -2.761824 |
| 6 | -2.413932 | 3.847678  | -1.551319 |
| 6 | -2.386535 | -3.973597 | 1.041061  |
| 6 | -2.577465 | -4.048584 | -0.374923 |
| 6 | -2.585454 | 4.005267  | 1.296702  |
| 6 | -2.679764 | 3.397057  | 2.597251  |
| 6 | -2.954909 | -2.806699 | -2.918353 |
| 6 | -3.129921 | -1.635903 | -3.738316 |
| 6 | -2.896668 | 1.067056  | 4.209641  |
| 6 | -3.028349 | -0.374766 | 4.321805  |
| 6 | -3.416194 | 1.182369  | -3.938431 |
| 6 | -3.528130 | 2.479503  | -3.292121 |
| 6 | -3.353291 | -2.908222 | 3.079167  |
| 6 | -3.538054 | -3.718385 | 1.886324  |
| 6 | -3.711518 | 4.044894  | -0.931467 |
| 6 | -3.782972 | 4.165733  | 0.514142  |
| 6 | -3.918180 | -3.943882 | -0.917184 |
| 6 | -4.095652 | -3.349485 | -2.230029 |
| 6 | -3.979174 | 3.053489  | 3.144327  |
| 6 | -4.070668 | 1.870535  | 4.034951  |
| 6 | -4.456824 | -1.089004 | -3.944923 |
| 6 | -4.588866 | 0.376567  | -4.109160 |
| 6 | -4.333252 | -0.978029 | 4.312937  |
| 6 | -4.494431 | -2.305536 | 3.708748  |
| 6 | -4.819828 | 2.961994  | -2.876289 |
| 6 | -4.912336 | 3.795533  | -1.679337 |
| 6 | -4.866763 | -3.951826 | 1.380037  |
| 6 | -5.059295 | -4.104869 | -0.056515 |
| 6 | -5.065584 | 4.086434  | 1.175335  |
| 6 | -5.134116 | 3.585822  | 2.502804  |
| 6 | -5.421592 | -2.979166 | -2.674070 |
| 6 | -5.575366 | -1.893217 | -3.572329 |
| 6 | -5.334136 | 1.270546  | 4.399267  |
| 6 | -5.459649 | -0.100947 | 4.550088  |
| 6 | -5.866741 | 1.052927  | -4.028462 |
| 6 | -5.978042 | 2.303934  | -3.449660 |
| 6 | -5.794949 | -2.865204 | 3.388933  |
| 6 | -5.971832 | -3.668954 | 2.280835  |
| 6 | -6.183625 | 4.077235  | -1.018895 |
| 6 | -6.258907 | 4.235299  | 0.345048  |
| 6 | -6.380569 | -4.059443 | -0.680153 |
| 6 | -6.556007 | -3.539664 | -1.939737 |
| 1 | 7.565591  | -3.417080 | 2.356743  |
| 1 | 7.256651  | -4.359368 | 0.091700  |
| 1 | 7.234551  | 4.343799  | -0.839853 |
| 1 | 7.105937  | 4.065483  | 1.613039  |
| 1 | 6.985272  | -3.986610 | -2.002750 |
| 1 | 6.670701  | -2.557004 | -3.973512 |
| 1 | 6.974739  | 2.738538  | 3.297619  |

|   |           |           |           |
|---|-----------|-----------|-----------|
| 1 | 6.778220  | 0.518764  | 4.324663  |
| 1 | 6.456628  | -0.533641 | -4.706258 |
| 1 | 6.235418  | 1.894910  | -4.440347 |
| 1 | 6.592926  | -1.538085 | 3.781255  |
| 1 | 6.127862  | 3.398700  | -2.930324 |
| 1 | -6.127879 | 3.399256  | 2.929598  |
| 1 | -6.592914 | -1.538907 | -3.780997 |
| 1 | -6.235390 | 1.895886  | 4.440064  |
| 1 | -6.456591 | -0.532609 | 4.706509  |
| 1 | -6.778195 | 0.517816  | -4.324907 |
| 1 | -6.974733 | 2.737791  | -3.298289 |
| 1 | -6.670693 | -2.556085 | 3.974098  |
| 1 | -6.985294 | -3.986068 | 2.003607  |
| 1 | -7.105960 | 4.065001  | -1.613921 |
| 1 | -7.234581 | 4.343830  | 0.838910  |
| 1 | -7.256673 | -4.359265 | -0.090745 |
| 1 | -7.565595 | -3.417527 | -2.356019 |

Nanotube (7,5) u05v04  
B3LYP/STO-3G Energy: -4832.835097

|   |          |           |           |
|---|----------|-----------|-----------|
| 6 | 6.699862 | 2.636001  | -2.992093 |
| 6 | 6.606167 | 3.466500  | -1.902183 |
| 6 | 6.202352 | -4.277687 | 1.222487  |
| 6 | 6.064876 | -4.466022 | -0.132188 |
| 6 | 6.323313 | 3.861223  | 1.073269  |
| 6 | 6.167383 | 3.375180  | 2.354913  |
| 6 | 5.809393 | -3.360271 | -2.926391 |
| 6 | 5.720885 | -2.295088 | -3.802742 |
| 6 | 5.779815 | 1.019472  | 4.199077  |
| 6 | 5.594150 | -0.335980 | 4.412365  |
| 6 | 5.574577 | 0.681004  | -4.109950 |
| 6 | 5.509247 | 1.965754  | -3.517042 |
| 6 | 5.212560 | -3.045553 | 3.183523  |
| 6 | 5.058622 | -3.861722 | 2.033030  |
| 6 | 5.318624 | 3.736070  | -1.263196 |
| 6 | 5.188336 | 3.961012  | 0.169282  |
| 6 | 4.773793 | -4.293970 | -0.793748 |
| 6 | 4.655069 | -3.787492 | -2.157631 |
| 6 | 4.861567 | 2.980173  | 2.853388  |
| 6 | 4.677557 | 1.861907  | 3.783519  |
| 6 | 4.469034 | -1.594372 | -4.005854 |
| 6 | 4.405846 | -0.132753 | -4.222068 |
| 6 | 4.291222 | -0.945685 | 4.261944  |
| 6 | 4.110752 | -2.310386 | 3.711869  |
| 6 | 4.221932 | 2.506756  | -3.136740 |
| 6 | 4.131753 | 3.422643  | -2.014357 |
| 6 | 3.741716 | -4.042551 | 1.463863  |
| 6 | 3.602327 | -4.285732 | 0.039056  |
| 6 | 3.876337 | 3.931406  | 0.765827  |
| 6 | 3.716354 | 3.459945  | 2.131951  |
| 6 | 3.364308 | -3.359157 | -2.633585 |
| 6 | 3.273595 | -2.266669 | -3.588233 |
| 6 | 3.351996 | 1.347482  | 3.995928  |
| 6 | 3.159206 | -0.066531 | 4.266738  |
| 6 | 3.114403 | 0.518208  | -4.118266 |
| 6 | 3.028172 | 1.868157  | -3.622996 |
| 6 | 2.774500 | -2.718643 | 3.323401  |
| 6 | 2.592228 | -3.632308 | 2.226169  |
| 6 | 2.824216 | 3.730470  | -1.469485 |
| 6 | 2.697839 | 4.023273  | -0.074426 |
| 6 | 2.284692 | -4.183643 | -0.559718 |
| 6 | 2.163925 | -3.751966 | -1.917934 |
| 6 | 2.379578 | 3.172680  | 2.626998  |
| 6 | 2.198330 | 2.137401  | 3.595264  |
| 6 | 1.970471 | -1.665182 | -3.848148 |
| 6 | 1.893194 | -0.272779 | -4.165274 |
| 6 | 1.807482 | -0.615343 | 4.216785  |

|   |           |           |           |
|---|-----------|-----------|-----------|
| 6 | 1.616824  | -1.966780 | 3.789422  |
| 6 | 1.727255  | 2.435449  | -3.290345 |
| 6 | 1.630935  | 3.402852  | -2.234774 |
| 6 | 1.256733  | -3.859764 | 1.685824  |
| 6 | 1.105936  | -4.177115 | 0.292419  |
| 6 | 1.374621  | 4.063639  | 0.530843  |
| 6 | 1.219424  | 3.674742  | 1.909535  |
| 6 | 0.855628  | -3.388538 | -2.439673 |
| 6 | 0.762139  | -2.361021 | -3.449853 |
| 6 | 0.857645  | 1.664639  | 3.897957  |
| 6 | 0.665609  | 0.275632  | 4.256910  |
| 6 | 0.602512  | 0.393330  | -4.157452 |
| 6 | 0.524209  | 1.783130  | -3.756661 |
| 6 | 0.279890  | -2.436085 | 3.478061  |
| 6 | 0.101077  | -3.431421 | 2.436663  |
| 6 | 0.329280  | 3.760620  | -1.710815 |
| 6 | 0.206942  | 4.129192  | -0.312537 |
| 6 | -0.206933 | -4.129212 | -0.312278 |
| 6 | -0.329274 | -3.760730 | -1.710580 |
| 6 | -0.101076 | 3.431578  | 2.436448  |
| 6 | -0.279895 | 2.436307  | 3.477908  |
| 6 | -0.524213 | -1.783369 | -3.756549 |
| 6 | -0.602519 | -0.393592 | -4.157424 |
| 6 | -0.665621 | -0.275362 | 4.256922  |
| 6 | -0.857653 | -1.664392 | 3.898056  |
| 6 | -0.762141 | 2.360803  | -3.449997 |
| 6 | -0.855625 | 3.388386  | -2.439884 |
| 6 | -1.219420 | -3.674626 | 1.909764  |
| 6 | -1.374613 | -4.063614 | 0.531097  |
| 6 | -1.105927 | 4.177144  | 0.292157  |
| 6 | -1.256727 | 3.859881  | 1.685581  |
| 6 | -1.630931 | -3.403002 | -2.234560 |
| 6 | -1.727256 | -2.435661 | -3.290189 |
| 6 | -1.616832 | 1.967021  | 3.789289  |
| 6 | -1.807493 | 0.615610  | 4.216731  |
| 6 | -1.893200 | 0.272515  | -4.165278 |
| 6 | -1.970476 | 1.664939  | -3.848240 |
| 6 | -2.198336 | -2.137175 | 3.595387  |
| 6 | -2.379577 | -3.172521 | 2.627192  |
| 6 | -2.163919 | 3.751856  | -1.918168 |
| 6 | -2.284682 | 4.183625  | -0.559982 |
| 6 | -2.697831 | -4.023297 | -0.074176 |
| 6 | -2.824210 | -3.730580 | -1.469252 |
| 6 | -2.592225 | 3.632463  | 2.225938  |
| 6 | -2.774504 | 2.718860  | 3.323219  |
| 6 | -3.028175 | -1.868390 | -3.622866 |
| 6 | -3.114409 | -0.518469 | -4.118213 |
| 6 | -3.159218 | 0.066802  | 4.266707  |
| 6 | -3.352005 | -1.347229 | 3.995989  |
| 6 | -3.273598 | 2.266443  | -3.588357 |
| 6 | -3.364306 | 3.359000  | -2.633788 |
| 6 | -3.716351 | -3.459827 | 2.132163  |
| 6 | -3.876330 | -3.931385 | 0.766072  |
| 6 | -3.602316 | 4.285764  | 0.038786  |
| 6 | -3.741708 | 4.042672  | 1.463608  |
| 6 | -4.131748 | -3.422792 | -2.014143 |
| 6 | -4.221932 | -2.506966 | -3.136574 |
| 6 | -4.110759 | 2.310628  | 3.711703  |
| 6 | -4.291234 | 0.945956  | 4.261850  |
| 6 | -4.405854 | 0.132485  | -4.222046 |
| 6 | -4.469040 | 1.594118  | -4.005924 |
| 6 | -4.677565 | -1.861671 | 3.783610  |
| 6 | -4.861567 | -2.980010 | 2.853564  |
| 6 | -4.655064 | 3.787376  | -2.157864 |
| 6 | -4.773782 | 4.293958  | -0.794018 |
| 6 | -5.188328 | -3.961040 | 0.169527  |
| 6 | -5.318618 | -3.736185 | -1.262964 |
| 6 | -5.058616 | 3.861885  | 2.032784  |
| 6 | -5.212562 | 3.045774  | 3.183317  |
| 6 | -5.509249 | -1.965987 | -3.516900 |

|   |           |           |           |
|---|-----------|-----------|-----------|
| 6 | -5.574584 | -0.681265 | -4.109870 |
| 6 | -5.594163 | 0.336259  | 4.412294  |
| 6 | -5.779826 | -1.019207 | 4.199096  |
| 6 | -5.720889 | 2.294847  | -3.802854 |
| 6 | -5.809391 | 3.360098  | -2.926584 |
| 6 | -6.167380 | -3.375065 | 2.355117  |
| 6 | -6.323306 | -3.861200 | 1.073508  |
| 6 | -6.064864 | 4.466069  | -0.132470 |
| 6 | -6.202342 | 4.277818  | 1.222218  |
| 6 | -6.606162 | -3.466656 | -1.901966 |
| 6 | -6.699861 | -2.636212 | -2.991915 |
| 1 | 7.682391  | 2.361011  | -3.400028 |
| 1 | 7.520694  | 3.861563  | -1.441270 |
| 1 | 7.196129  | -4.309231 | 1.690234  |
| 1 | 6.955424  | -4.653774 | -0.745816 |
| 1 | 7.333883  | 4.048413  | 0.688551  |
| 1 | 7.056448  | 3.183089  | 2.969347  |
| 1 | 6.793022  | -3.795277 | -2.708347 |
| 1 | 6.636928  | -1.903697 | -4.263895 |
| 1 | 6.798641  | 1.427388  | 4.204177  |
| 1 | 6.470752  | -0.974369 | 4.582610  |
| 1 | 6.565040  | 0.231817  | -4.257182 |
| 1 | 6.232525  | -2.806490 | 3.510790  |
| 1 | -6.232527 | 2.806737  | 3.510596  |
| 1 | -6.565052 | -0.232083 | -4.257114 |
| 1 | -6.470768 | 0.974659  | 4.582484  |
| 1 | -6.798655 | -1.427121 | 4.204205  |
| 1 | -6.636936 | 1.903419  | -4.263968 |
| 1 | -6.793017 | 3.795121  | -2.708568 |
| 1 | -7.056447 | -3.182938 | 2.969539  |
| 1 | -7.333878 | -4.048420 | 0.688799  |
| 1 | -6.955409 | 4.653795  | -0.746110 |
| 1 | -7.196116 | 4.309405  | 1.689963  |
| 1 | -7.520687 | -3.861700 | -1.441033 |
| 1 | -7.682391 | -2.361246 | -3.399863 |

Nanotube (7,5) u05v05  
B3LYP/STO-3G Energy: -4908.129191

|   |           |           |           |
|---|-----------|-----------|-----------|
| 6 | -6.875134 | -2.009422 | -3.328638 |
| 6 | -6.704719 | -3.087321 | -2.495579 |
| 6 | -6.359976 | 3.609181  | 2.502919  |
| 6 | -6.295690 | 4.142826  | 1.238266  |
| 6 | -6.259418 | -4.218895 | 0.264150  |
| 6 | -6.050304 | -4.069776 | 1.618911  |
| 6 | -6.147078 | 3.799692  | -1.754706 |
| 6 | -6.071735 | 2.998856  | -2.877637 |
| 6 | -5.632908 | -2.251805 | 3.989647  |
| 6 | -5.475468 | -0.991030 | 4.538112  |
| 6 | -5.859428 | 0.209471  | -3.946847 |
| 6 | -5.730178 | -1.179817 | -3.710631 |
| 6 | -5.237006 | 1.956790  | 4.036546  |
| 6 | -5.165164 | 3.046049  | 3.131905  |
| 6 | -5.379121 | -3.461838 | -2.001907 |
| 6 | -5.169917 | -4.039708 | -0.683970 |
| 6 | -5.034144 | 4.197883  | 0.502217  |
| 6 | -4.968144 | 4.061248  | -0.947937 |
| 6 | -4.730909 | -3.762066 | 2.145203  |
| 6 | -4.530003 | -2.912573 | 3.320984  |
| 6 | -4.811315 | 2.422342  | -3.303858 |
| 6 | -4.718790 | 1.070163  | -3.892224 |
| 6 | -4.199782 | -0.309023 | 4.493640  |
| 6 | -4.087571 | 1.156139  | 4.311031  |
| 6 | -4.410909 | -1.750984 | -3.538723 |
| 6 | -4.240109 | -2.921503 | -2.697953 |
| 6 | -3.883648 | 3.422611  | 2.576265  |
| 6 | -3.822490 | 4.027003  | 1.257824  |
| 6 | -3.829611 | -4.114006 | -0.156662 |

|   |           |           |           |
|---|-----------|-----------|-----------|
| 6 | -3.611489 | -3.998249 | 1.276205  |
| 6 | -3.690316 | 3.821024  | -1.570001 |
| 6 | -3.616011 | 3.012353  | -2.776143 |
| 6 | -3.209797 | -2.415518 | 3.600994  |
| 6 | -3.043773 | -1.112260 | 4.221101  |
| 6 | -3.407266 | 0.465296  | -4.013971 |
| 6 | -3.260600 | -0.962972 | -3.891382 |
| 6 | -2.785356 | 1.706984  | 3.989347  |
| 6 | -2.685903 | 2.880140  | 3.160478  |
| 6 | -2.899905 | -3.310077 | -2.308595 |
| 6 | -2.694651 | -3.945460 | -1.042490 |
| 6 | -2.534331 | 4.135252  | 0.600169  |
| 6 | -2.468474 | 4.066537  | -0.827049 |
| 6 | -2.259695 | -3.791618 | 1.768958  |
| 6 | -2.057363 | -3.027575 | 2.959941  |
| 6 | -2.311380 | 2.547738  | -3.232952 |
| 6 | -2.211504 | 1.288146  | -3.901542 |
| 6 | -1.713786 | -0.513639 | 4.257783  |
| 6 | -1.584135 | 0.908848  | 4.193623  |
| 6 | -1.930218 | -1.546340 | -3.771814 |
| 6 | -1.755650 | -2.749718 | -3.012074 |
| 6 | -1.386925 | 3.294283  | 2.643606  |
| 6 | -1.315026 | 3.960953  | 1.374414  |
| 6 | -1.341429 | -4.087971 | -0.525096 |
| 6 | -1.125141 | -4.050642 | 0.896792  |
| 6 | -1.176817 | 3.898331  | -1.476303 |
| 6 | -1.103862 | 3.165438  | -2.716944 |
| 6 | -0.716461 | -2.589834 | 3.312106  |
| 6 | -0.545647 | -1.336118 | 4.010453  |
| 6 | -0.903577 | 0.693043  | -4.118639 |
| 6 | -0.768340 | -0.748426 | -4.100068 |
| 6 | -0.278229 | 1.499636  | 3.962088  |
| 6 | -0.181574 | 2.736139  | 3.212754  |
| 6 | -0.419756 | -3.183004 | -2.656290 |
| 6 | -0.216047 | -3.895791 | -1.409307 |
| 6 | -0.031650 | 4.122928  | 0.724796  |
| 6 | 0.031648  | 4.122882  | -0.725055 |
| 6 | 0.216044  | -3.895699 | 1.409552  |
| 6 | 0.419755  | -3.182832 | 2.656489  |
| 6 | 0.181575  | 2.735932  | -3.212923 |
| 6 | 0.278231  | 1.499382  | -3.962180 |
| 6 | 0.768343  | -0.748164 | 4.100112  |
| 6 | 0.903580  | 0.693306  | 4.118594  |
| 6 | 0.545649  | -1.336375 | -4.010368 |
| 6 | 0.716462  | -2.590048 | -3.311944 |
| 6 | 1.103862  | 3.165614  | 2.716746  |
| 6 | 1.176816  | 3.898428  | 1.476059  |
| 6 | 1.125138  | -4.050703 | -0.896537 |
| 6 | 1.341426  | -4.087939 | 0.525353  |
| 6 | 1.315024  | 3.960866  | -1.374663 |
| 6 | 1.386925  | 3.294114  | -2.643811 |
| 6 | 1.755650  | -2.749525 | 3.012244  |
| 6 | 1.930220  | -1.546099 | 3.771907  |
| 6 | 1.584138  | 0.908580  | -4.193675 |
| 6 | 1.713789  | -0.513911 | -4.257747 |
| 6 | 2.211506  | 1.288396  | 3.901458  |
| 6 | 2.311381  | 2.547947  | 3.232791  |
| 6 | 2.057363  | -3.027768 | -2.959750 |
| 6 | 2.259692  | -3.791737 | -1.768720 |
| 6 | 2.468472  | 4.066595  | 0.826794  |
| 6 | 2.534329  | 4.135219  | -0.600429 |
| 6 | 2.694649  | -3.945398 | 1.042737  |
| 6 | 2.899904  | -3.309931 | 2.308800  |
| 6 | 2.685904  | 2.879939  | -3.160655 |
| 6 | 2.785358  | 1.706728  | -3.989448 |
| 6 | 3.260602  | -0.962724 | 3.891435  |
| 6 | 3.407268  | 0.465553  | 4.013935  |
| 6 | 3.043775  | -1.112531 | -4.221026 |
| 6 | 3.209797  | -2.415751 | -3.600840 |
| 6 | 3.616012  | 3.012535  | 2.775953  |

|   |           |           |           |
|---|-----------|-----------|-----------|
| 6 | 3.690315  | 3.821133  | 1.569762  |
| 6 | 3.611486  | -3.998340 | -1.275953 |
| 6 | 3.829607  | -4.114004 | 0.156920  |
| 6 | 3.822489  | 4.026929  | -1.258076 |
| 6 | 3.883648  | 3.422449  | -2.576477 |
| 6 | 4.240108  | -2.921332 | 2.698132  |
| 6 | 4.410910  | -1.750757 | 3.538823  |
| 6 | 4.087574  | 1.155863  | -4.311093 |
| 6 | 4.199786  | -0.309309 | -4.493610 |
| 6 | 4.718793  | 1.070411  | 3.892147  |
| 6 | 4.811316  | 2.422556  | 3.303702  |
| 6 | 4.530003  | -2.912791 | -3.320798 |
| 6 | 4.730906  | -3.762213 | -2.144966 |
| 6 | 4.968143  | 4.061319  | 0.947682  |
| 6 | 5.034142  | 4.197861  | -0.502480 |
| 6 | 5.169914  | -4.039674 | 0.684224  |
| 6 | 5.379120  | -3.461715 | 2.002120  |
| 6 | 5.165165  | 3.045852  | -3.132090 |
| 6 | 5.237008  | 1.956532  | -4.036658 |
| 6 | 5.730180  | -1.179581 | 3.710692  |
| 6 | 5.859430  | 0.209723  | 3.946819  |
| 6 | 5.475472  | -0.991320 | -4.538037 |
| 6 | 5.632910  | -2.252062 | -3.989496 |
| 6 | 6.071736  | 2.999046  | 2.877446  |
| 6 | 6.147077  | 3.799815  | 1.754468  |
| 6 | 6.050300  | -4.069896 | -1.618656 |
| 6 | 6.259414  | -4.218929 | -0.263885 |
| 6 | 6.295688  | 4.142758  | -1.238526 |
| 6 | 6.359976  | 3.609028  | -2.503142 |
| 6 | 6.704718  | -3.087165 | 2.495766  |
| 6 | 6.875134  | -2.009210 | 3.328751  |
| 1 | -7.883724 | -1.677681 | -3.611663 |
| 1 | -7.583705 | -3.623763 | -2.115419 |
| 1 | -7.329501 | 3.480131  | 3.003643  |
| 1 | -7.220516 | 4.445652  | 0.730451  |
| 1 | -7.282862 | -4.343038 | -0.111992 |
| 1 | -6.910658 | -4.077518 | 2.300513  |
| 1 | -7.130197 | 4.127515  | -1.393681 |
| 1 | -6.997339 | 2.704385  | -3.389003 |
| 1 | -6.637314 | -2.690762 | 3.935445  |
| 1 | -6.359165 | -0.455420 | 4.908458  |
| 1 | -6.867525 | 0.643157  | -3.932787 |
| 1 | -6.231410 | 1.598896  | 4.332517  |
| 1 | 6.231415  | 1.598617  | -4.332603 |
| 1 | 6.867527  | 0.643408  | 3.932731  |
| 1 | 6.359169  | -0.455731 | -4.908413 |
| 1 | 6.637316  | -2.691016 | -3.935266 |
| 1 | 6.997340  | 2.704608  | 3.388830  |
| 1 | 7.130194  | 4.127619  | 1.393425  |
| 1 | 6.910654  | -4.077687 | -2.300258 |
| 1 | 7.282858  | -4.343054 | 0.112265  |
| 1 | 7.220513  | 4.445621  | -0.730730 |
| 1 | 7.329504  | 3.479942  | -3.003856 |
| 1 | 7.583704  | -3.623633 | 2.115641  |
| 1 | 7.883726  | -1.677450 | 3.611752  |

Nanotube (7,5) u05v06  
B3LYP/STO-3G Energy: -4983.423049

|   |           |           |           |
|---|-----------|-----------|-----------|
| 6 | -6.805272 | -0.954207 | -4.023434 |
| 6 | -6.693490 | -2.213305 | -3.488399 |
| 6 | -6.558623 | 2.976242  | 3.070833  |
| 6 | -6.420984 | 3.814404  | 1.991396  |
| 6 | -6.414272 | -4.023445 | -1.091743 |
| 6 | -6.277768 | -4.229272 | 0.264365  |
| 6 | -6.110023 | 4.243323  | -0.978893 |
| 6 | -5.978688 | 3.752555  | -2.262650 |
| 6 | -5.969267 | -3.085870 | 3.039114  |



|   |           |           |           |
|---|-----------|-----------|-----------|
| 6 | -5.828264 | -2.010993 | 3.897894  |
| 6 | -5.733096 | 1.323057  | -3.996043 |
| 6 | -5.631780 | -0.082210 | -4.118068 |
| 6 | -5.534801 | 0.960371  | 4.180357  |
| 6 | -5.404293 | 2.242490  | 3.592621  |
| 6 | -5.401492 | -2.734748 | -3.039986 |
| 6 | -5.272086 | -3.635341 | -1.907201 |
| 6 | -5.119989 | 4.027921  | 1.358550  |
| 6 | -4.975208 | 4.264102  | -0.071306 |
| 6 | -4.985035 | -4.098033 | 0.917266  |
| 6 | -4.838436 | -3.580541 | 2.277732  |
| 6 | -4.700871 | 3.272835  | -2.755222 |
| 6 | -4.588029 | 2.113658  | -3.661874 |
| 6 | -4.544162 | -1.369442 | 4.090986  |
| 6 | -4.408015 | 0.089427  | 4.296345  |
| 6 | -4.329842 | -0.710939 | -4.030992 |
| 6 | -4.219018 | -2.062069 | -3.515062 |
| 6 | -4.090603 | 2.721353  | 3.219214  |
| 6 | -3.952493 | 3.643786  | 2.107009  |
| 6 | -3.963277 | -3.877235 | -1.350522 |
| 6 | -3.822363 | -4.135398 | 0.073160  |
| 6 | -3.666365 | 4.163293  | -0.667857 |
| 6 | -3.531367 | 3.683842  | -2.033990 |
| 6 | -3.529649 | -3.202957 | 2.740367  |
| 6 | -3.383532 | -2.103758 | 3.679616  |
| 6 | -3.277669 | 1.528080  | -3.865144 |
| 6 | -3.152984 | 0.112603  | -4.107479 |
| 6 | -3.085932 | 0.674476  | 4.192899  |
| 6 | -2.931368 | 2.019843  | 3.702342  |
| 6 | -2.907230 | -2.572480 | -3.173561 |
| 6 | -2.779825 | -3.517928 | -2.105904 |
| 6 | -2.630258 | 3.890510  | 1.566877  |
| 6 | -2.486370 | 4.187314  | 0.174780  |
| 6 | -2.497682 | -4.094286 | 0.668799  |
| 6 | -2.351604 | -3.659907 | 2.022690  |
| 6 | -2.207974 | 3.318550  | -2.523768 |
| 6 | -2.082547 | 2.265104  | -3.482168 |
| 6 | -2.051802 | -1.564415 | 3.931501  |
| 6 | -1.904819 | -0.177019 | 4.241003  |
| 6 | -1.838368 | -0.514700 | -4.073507 |
| 6 | -1.719427 | -1.878094 | -3.647394 |
| 6 | -1.602775 | 2.523945  | 3.375855  |
| 6 | -1.456264 | 3.494920  | 2.330682  |
| 6 | -1.459187 | -3.822807 | -1.575565 |
| 6 | -1.320351 | -4.152550 | -0.183688 |
| 6 | -1.162106 | 4.161630  | -0.428835 |
| 6 | -1.025711 | 3.760273  | -1.805622 |
| 6 | -1.026086 | -3.355930 | 2.539143  |
| 6 | -0.879597 | -2.324100 | 3.538721  |
| 6 | -0.769966 | 1.711169  | -3.771045 |
| 6 | -0.650602 | 0.312601  | -4.118352 |
| 6 | -0.581952 | 0.423357  | 4.233824  |
| 6 | -0.433646 | 1.809098  | 3.839198  |
| 6 | -0.409699 | -2.424533 | -3.350367 |
| 6 | -0.283704 | -3.440180 | -2.325280 |
| 6 | -0.137428 | 3.793544  | 1.812214  |
| 6 | 0.006179  | 4.166585  | 0.417551  |
| 6 | -0.006179 | -4.166563 | 0.417765  |
| 6 | 0.137428  | -3.793450 | 1.812409  |
| 6 | 0.283704  | 3.440059  | -2.325456 |
| 6 | 0.409700  | 2.424359  | -3.350491 |
| 6 | 0.433645  | -1.808899 | 3.839291  |
| 6 | 0.581951  | -0.423138 | 4.233847  |
| 6 | 0.650603  | -0.312814 | -4.118336 |
| 6 | 0.769966  | -1.711365 | -3.770958 |
| 6 | 0.879597  | 2.324283  | 3.538602  |
| 6 | 1.026085  | 3.356062  | 2.538971  |
| 6 | 1.025710  | -3.760367 | -1.805430 |
| 6 | 1.162106  | -4.161652 | -0.428620 |
| 6 | 1.320350  | 4.152541  | -0.183901 |

|   |           |           |           |
|---|-----------|-----------|-----------|
| 6 | 1.459187  | 3.822726  | -1.575761 |
| 6 | 1.456264  | -3.494798 | 2.330862  |
| 6 | 1.602774  | -2.523769 | 3.375984  |
| 6 | 1.719428  | 1.877905  | -3.647489 |
| 6 | 1.838368  | 0.514489  | -4.073533 |
| 6 | 1.904818  | 0.177238  | 4.240994  |
| 6 | 2.051801  | 1.564618  | 3.931421  |
| 6 | 2.082548  | -2.265284 | -3.482051 |
| 6 | 2.207974  | -3.318681 | -2.523597 |
| 6 | 2.351603  | 3.660013  | 2.022503  |
| 6 | 2.497682  | 4.094321  | 0.668589  |
| 6 | 2.486370  | -4.187304 | 0.174995  |
| 6 | 2.630258  | -3.890428 | 1.567077  |
| 6 | 2.779825  | 3.517818  | -2.106084 |
| 6 | 2.907230  | 2.572316  | -3.173692 |
| 6 | 2.931368  | -2.019650 | 3.702445  |
| 6 | 3.085933  | -0.674259 | 4.192933  |
| 6 | 3.152985  | -0.112816 | -4.107472 |
| 6 | 3.277670  | -1.528280 | -3.865065 |
| 6 | 3.383531  | 2.103949  | 3.679509  |
| 6 | 3.529648  | 3.203099  | 2.740204  |
| 6 | 3.531367  | -3.683949 | -2.033801 |
| 6 | 3.666365  | -4.163328 | -0.667643 |
| 6 | 3.822364  | 4.135402  | 0.072948  |
| 6 | 3.963277  | 3.877165  | -1.350720 |
| 6 | 3.952493  | -3.643676 | 2.107196  |
| 6 | 4.090603  | -2.721185 | 3.219353  |
| 6 | 4.219019  | 2.061886  | -3.515167 |
| 6 | 4.329843  | 0.710730  | -4.031027 |
| 6 | 4.408015  | -0.089204 | 4.296349  |
| 6 | 4.544161  | 1.369656  | 4.090917  |
| 6 | 4.588030  | -2.113848 | -3.661765 |
| 6 | 4.700872  | -3.272980 | -2.755054 |
| 6 | 4.838435  | 3.580660  | 2.277551  |
| 6 | 4.985034  | 4.098082  | 0.917057  |
| 6 | 4.975208  | -4.264109 | -0.071088 |
| 6 | 5.119988  | -4.027852 | 1.358757  |
| 6 | 5.272086  | 3.635243  | -1.907386 |
| 6 | 5.401493  | 2.734591  | -3.040126 |
| 6 | 5.404293  | -2.242302 | 3.592733  |
| 6 | 5.534801  | -0.960153 | 4.180403  |
| 6 | 5.631781  | 0.081996  | -4.118072 |
| 6 | 5.733097  | -1.323265 | -3.995974 |
| 6 | 5.828262  | 2.011199  | 3.897794  |
| 6 | 5.969265  | 3.086031  | 3.038961  |
| 6 | 5.978688  | -3.752678 | -2.262459 |
| 6 | 6.110021  | -4.243382 | -0.978677 |
| 6 | 6.277768  | 4.229285  | 0.264150  |
| 6 | 6.414273  | 4.023388  | -1.091948 |
| 6 | 6.420984  | -3.814300 | 1.991590  |
| 6 | 6.558624  | -2.976080 | 3.070983  |
| 6 | 6.693490  | 2.213125  | -3.488511 |
| 6 | 6.805273  | 0.953998  | -4.023482 |
| 1 | -7.792663 | -0.536270 | -4.264202 |
| 1 | -7.597930 | -2.807955 | -3.305730 |
| 1 | -7.554921 | 2.745507  | 3.473040  |
| 1 | -7.313728 | 4.259125  | 1.532925  |
| 1 | -7.416935 | -4.022585 | -1.538183 |
| 1 | -7.173849 | -4.389613 | 0.877753  |
| 1 | -7.108710 | 4.492645  | -0.597964 |
| 1 | -6.876213 | 3.620471  | -2.880714 |
| 1 | -6.973518 | -3.474622 | 2.826771  |
| 1 | -6.724253 | -1.567868 | 4.351587  |
| 1 | -6.735616 | 1.763920  | -3.925324 |
| 1 | -6.546701 | 0.560795  | 4.325153  |
| 1 | 6.546701  | -0.560568 | 4.325175  |
| 1 | 6.735619  | -1.764123 | -3.925230 |
| 1 | 6.724253  | 1.568100  | 4.351512  |
| 1 | 6.973517  | 3.474771  | 2.826599  |
| 1 | 6.876213  | -3.620628 | -2.880530 |

|   |          |           |           |
|---|----------|-----------|-----------|
| 1 | 7.108703 | -4.492691 | -0.597739 |
| 1 | 7.173849 | 4.389657  | 0.877531  |
| 1 | 7.416933 | 4.022505  | -1.538387 |
| 1 | 7.313728 | -4.259044 | 1.533141  |
| 1 | 7.554922 | -2.745321 | 3.473175  |
| 1 | 7.597930 | 2.807785  | -3.305873 |
| 1 | 7.792663 | 0.536050  | -4.264229 |

Nanotube (7,5) u05v07  
B3LYP/STO-3G Energy: -5058.716462

|   |          |           |           |
|---|----------|-----------|-----------|
| 6 | 7.105049 | -0.050487 | -3.849944 |
| 6 | 6.970669 | 1.302118  | -3.662904 |
| 6 | 6.494203 | -2.038281 | 4.001277  |
| 6 | 6.409804 | -3.126810 | 3.168261  |
| 6 | 6.581628 | 3.663327  | -1.826457 |
| 6 | 6.380268 | 4.207709  | -0.576996 |
| 6 | 6.249679 | -4.301639 | 0.393275  |
| 6 | 6.183626 | -4.155697 | -0.977564 |
| 6 | 5.930079 | 3.806899  | 2.380062  |
| 6 | 5.741076 | 2.986054  | 3.476119  |
| 6 | 6.027869 | -2.254438 | -3.286189 |
| 6 | 5.935068 | -0.930040 | -3.769501 |
| 6 | 5.421371 | 0.185304  | 4.498306  |
| 6 | 5.316878 | -1.205217 | 4.255457  |
| 6 | 5.659301 | 1.908220  | -3.423026 |
| 6 | 5.478268 | 3.067364  | -2.568739 |
| 6 | 5.142328 | -3.508578 | 2.545714  |
| 6 | 5.069958 | -4.103893 | 1.219804  |
| 6 | 5.055815 | 4.236523  | 0.025219  |
| 6 | 4.840225 | 4.082189  | 1.462257  |
| 6 | 4.931987 | -3.832846 | -1.638527 |
| 6 | 4.865404 | -2.945878 | -2.814600 |
| 6 | 4.445083 | 2.403858  | 3.762726  |
| 6 | 4.292647 | 1.046413  | 4.327179  |
| 6 | 4.631100 | -0.313257 | -3.908402 |
| 6 | 4.498680 | 1.123749  | -3.764250 |
| 6 | 4.022112 | -1.777575 | 3.951856  |
| 6 | 3.938435 | -2.957336 | 3.111483  |
| 6 | 4.144465 | 3.433711  | -2.157142 |
| 6 | 3.935532 | 4.048892  | -0.856520 |
| 6 | 3.792642 | -4.175846 | 0.553761  |
| 6 | 3.727003 | -4.062222 | -0.894312 |
| 6 | 3.507815 | 3.826430  | 1.942113  |
| 6 | 3.309479 | 3.000434  | 3.121413  |
| 6 | 3.567846 | -2.446288 | -3.223908 |
| 6 | 3.457764 | -1.140709 | -3.826026 |
| 6 | 2.975391 | 0.441689  | 4.310235  |
| 6 | 2.841631 | -0.986701 | 4.176947  |
| 6 | 3.173907 | 1.691843  | -3.628140 |
| 6 | 2.998139 | 2.880493  | -2.849139 |
| 6 | 2.645139 | -3.350705 | 2.589379  |
| 6 | 2.571804 | -3.998447 | 1.315499  |
| 6 | 2.584080 | 4.152711  | -0.335589 |
| 6 | 2.369634 | 4.078129  | 1.075660  |
| 6 | 2.430820 | -3.849136 | -1.524730 |
| 6 | 2.354329 | -3.074254 | -2.723268 |
| 6 | 1.964984 | 2.530523  | 3.433947  |
| 6 | 1.797062 | 1.265147  | 4.076531  |
| 6 | 2.144288 | -0.538890 | -4.014559 |
| 6 | 2.007907 | 0.886038  | -3.959945 |
| 6 | 1.530666 | -1.571559 | 3.924599  |
| 6 | 1.434629 | -2.782994 | 3.164177  |
| 6 | 1.654127 | 3.299842  | -2.478889 |
| 6 | 1.449393 | 3.978576  | -1.230537 |
| 6 | 1.279982 | -4.144241 | 0.661304  |
| 6 | 1.213085 | -4.108395 | -0.775500 |
| 6 | 1.018363 | 3.905973  | 1.587490  |

|   |           |           |           |
|---|-----------|-----------|-----------|
| 6 | 0.817077  | 3.157740  | 2.803339  |
| 6 | 1.057548  | -2.625458 | -3.205511 |
| 6 | 0.957502  | -1.363004 | -3.901533 |
| 6 | 0.473719  | 0.669099  | 4.152036  |
| 6 | 0.340814  | -0.771091 | 4.122782  |
| 6 | 0.686046  | 1.477750  | -3.875971 |
| 6 | 0.513813  | 2.723966  | -3.158609 |
| 6 | 0.142450  | -3.222816 | 2.676828  |
| 6 | 0.069145  | -3.946801 | 1.423952  |
| 6 | 0.107043  | 4.139950  | -0.717772 |
| 6 | -0.107054 | 4.140084  | 0.717003  |
| 6 | -0.069154 | -3.947066 | -1.423224 |
| 6 | -0.142452 | -3.223314 | -2.676235 |
| 6 | -0.513813 | 2.724555  | 3.158105  |
| 6 | -0.686038 | 1.478472  | 3.875700  |
| 6 | -0.340804 | -0.771859 | -4.122647 |
| 6 | -0.473709 | 0.668326  | -4.152169 |
| 6 | -0.957493 | -1.362277 | 3.901787  |
| 6 | -1.057546 | -2.624859 | 3.205997  |
| 6 | -0.817079 | 3.157213  | -2.803928 |
| 6 | -1.018372 | 3.905669  | -1.588216 |
| 6 | -1.213095 | -4.108241 | 0.776258  |
| 6 | -1.279991 | -4.144354 | -0.660539 |
| 6 | -1.449403 | 3.978797  | 1.229798  |
| 6 | -1.654130 | 3.300299  | 2.478280  |
| 6 | -1.434627 | -2.783580 | -3.163671 |
| 6 | -1.530657 | -1.572289 | -3.924323 |
| 6 | -2.007897 | 0.886775  | 3.959794  |
| 6 | -2.144277 | -0.538142 | 4.014672  |
| 6 | -1.797053 | 1.264387  | -4.076782 |
| 6 | -1.964981 | 2.529878  | -3.434426 |
| 6 | -2.354329 | -3.073738 | 2.723839  |
| 6 | -2.430827 | -3.848835 | 1.525441  |
| 6 | -2.369644 | 4.077907  | -1.076417 |
| 6 | -2.584091 | 4.152751  | 0.334817  |
| 6 | -2.571813 | -3.998672 | -1.314762 |
| 6 | -2.645141 | -3.351176 | -2.588767 |
| 6 | -2.998139 | 2.881016  | 2.848614  |
| 6 | -3.173899 | 1.692517  | 3.627845  |
| 6 | -2.841621 | -0.987478 | -4.176790 |
| 6 | -2.975379 | 0.440886  | -4.310344 |
| 6 | -3.457755 | -1.139996 | 3.826259  |
| 6 | -3.567842 | -2.445679 | 3.224373  |
| 6 | -3.309479 | 2.999840  | -3.121979 |
| 6 | -3.507823 | 3.826042  | -1.942825 |
| 6 | -3.727013 | -4.062025 | 0.895062  |
| 6 | -3.792653 | -4.175916 | -0.552990 |
| 6 | -3.935543 | 4.049021  | 0.855769  |
| 6 | -4.144471 | 3.434093  | 2.156513  |
| 6 | -3.938434 | -2.957904 | -3.110951 |
| 6 | -4.022103 | -1.778309 | -3.951557 |
| 6 | -4.498671 | 1.124448  | 3.764076  |
| 6 | -4.631090 | -0.312529 | 3.908498  |
| 6 | -4.292636 | 1.045606  | -4.327408 |
| 6 | -4.445079 | 2.403149  | -3.763192 |
| 6 | -4.865404 | -2.945339 | 2.815161  |
| 6 | -4.931995 | -3.832507 | 1.639238  |
| 6 | -4.840236 | 4.081876  | -1.463017 |
| 6 | -5.055828 | 4.236473  | -0.026005 |
| 6 | -5.069967 | -4.104081 | -1.219047 |
| 6 | -5.142331 | -3.509029 | -2.545078 |
| 6 | -5.478271 | 3.067824  | 2.568189  |
| 6 | -5.659296 | 1.908852  | 3.422713  |
| 6 | -5.316867 | -1.206010 | -4.255277 |
| 6 | -5.421357 | 0.184467  | -4.498389 |
| 6 | -5.935059 | -0.929336 | 3.769725  |
| 6 | -6.027864 | -2.253819 | 3.286644  |
| 6 | -5.741074 | 2.985385  | -3.476689 |
| 6 | -5.930086 | 3.806415  | -2.380773 |
| 6 | -6.183636 | -4.155457 | 0.978331  |

|   |           |           |           |
|---|-----------|-----------|-----------|
| 6 | -6.249690 | -4.301651 | -0.392482 |
| 6 | -6.380279 | 4.207761  | 0.576216  |
| 6 | -6.581634 | 3.663628  | 1.825789  |
| 6 | -6.409804 | -3.127380 | -3.167705 |
| 6 | -6.494195 | -2.039020 | -4.000940 |
| 6 | -6.970661 | 1.302797  | 3.662726  |
| 6 | -7.105038 | -0.049768 | 3.850024  |
| 1 | 8.101589  | -0.506254 | -3.931373 |
| 1 | 7.866264  | 1.933717  | -3.600117 |
| 1 | 7.468719  | -1.702937 | 4.382468  |
| 1 | 7.323227  | -3.666599 | 2.886758  |
| 1 | 7.604311  | 3.558821  | -2.210605 |
| 1 | 7.245574  | 4.529304  | 0.016914  |
| 1 | 7.227372  | -4.433815 | 0.873829  |
| 1 | 7.111070  | -4.174956 | -1.564420 |
| 1 | 6.945152  | 4.137582  | 2.125729  |
| 1 | 6.610646  | 2.681415  | 4.072731  |
| 1 | 7.024781  | -2.652737 | -3.058587 |
| 1 | 6.425491  | 0.618768  | 4.588669  |
| 1 | -6.425470 | 0.617912  | -4.588843 |
| 1 | -7.024779 | -2.652160 | 3.059122  |
| 1 | -6.610642 | 2.680635  | -4.073248 |
| 1 | -6.945164 | 4.137129  | -2.126496 |
| 1 | -7.111082 | -4.174592 | 1.565189  |
| 1 | -7.227384 | -4.433904 | -0.873011 |
| 1 | -7.245589 | 4.529227  | -0.017758 |
| 1 | -7.604314 | 3.559193  | 2.209958  |
| 1 | -7.323231 | -3.667106 | -2.886094 |
| 1 | -7.468709 | -1.703746 | -4.382197 |
| 1 | -7.866257 | 1.934383  | 3.599829  |
| 1 | -8.101576 | -0.505519 | 3.931549  |

Nanotube (7,5) u05v08  
B3LYP/STO-3G Energy: -5134.009727

|   |          |           |           |
|---|----------|-----------|-----------|
| 6 | 7.017394 | -4.000180 | 1.017885  |
| 6 | 6.869902 | -4.157960 | -0.336802 |
| 6 | 6.810123 | 4.114880  | 0.927927  |
| 6 | 6.703741 | 3.594199  | 2.193525  |
| 6 | 6.533426 | -2.971461 | -3.089450 |
| 6 | 6.384823 | -1.895973 | -3.937010 |
| 6 | 6.433987 | 1.225219  | 4.043693  |
| 6 | 6.302094 | -0.131406 | 4.255477  |
| 6 | 6.083956 | 1.084244  | -4.307756 |
| 6 | 5.959331 | 2.360798  | -3.793786 |
| 6 | 6.005913 | -2.839024 | 3.008591  |
| 6 | 5.867463 | -3.636898 | 1.851952  |
| 6 | 5.728654 | 4.077389  | -1.345788 |
| 6 | 5.633083 | 4.202244  | 0.059482  |
| 6 | 5.561974 | -4.012551 | -0.979866 |
| 6 | 5.404422 | -3.477255 | -2.318375 |
| 6 | 5.414158 | 3.151388  | 2.725719  |
| 6 | 5.290037 | 2.030353  | 3.642540  |
| 6 | 5.090572 | -1.254651 | -4.117164 |
| 6 | 4.947009 | 0.181565  | -4.337427 |
| 6 | 5.014953 | -0.791140 | 4.118015  |
| 6 | 4.878272 | -2.148322 | 3.562316  |
| 6 | 4.686268 | 2.850532  | -3.301297 |
| 6 | 4.579679 | 3.747335  | -2.133145 |
| 6 | 4.547587 | -3.861091 | 1.295250  |
| 6 | 4.398469 | -4.080875 | -0.129734 |
| 6 | 4.333591 | 4.118173  | 0.693920  |
| 6 | 4.228789 | 3.614556  | 2.050319  |
| 6 | 4.086235 | -3.106470 | -2.775437 |
| 6 | 3.931351 | -2.001189 | -3.706464 |
| 6 | 3.984187 | 1.469400  | 3.890417  |
| 6 | 3.849617 | 0.045947  | 4.155781  |
| 6 | 3.642679 | 0.777425  | -4.213042 |

|   |           |           |           |
|---|-----------|-----------|-----------|
| 6 | 3.512728  | 2.136641  | -3.715070 |
| 6 | 3.554601  | -2.607003 | 3.190284  |
| 6 | 3.393498  | -3.513256 | 2.079822  |
| 6 | 3.272437  | 3.949440  | -1.541178 |
| 6 | 3.153544  | 4.190431  | -0.125145 |
| 6 | 3.072833  | -4.026054 | -0.709180 |
| 6 | 2.916326  | -3.571619 | -2.058690 |
| 6 | 2.919569  | 3.274933  | 2.568628  |
| 6 | 2.797716  | 2.217576  | 3.525389  |
| 6 | 2.605682  | -1.458015 | -3.940758 |
| 6 | 2.460988  | -0.066145 | -4.233597 |
| 6 | 2.523175  | -0.553305 | 4.118881  |
| 6 | 2.377588  | -1.904524 | 3.676904  |
| 6 | 2.192202  | 2.624368  | -3.337605 |
| 6 | 2.072794  | 3.572148  | -2.275514 |
| 6 | 2.062924  | -3.779182 | 1.550475  |
| 6 | 1.905673  | -4.078486 | 0.158577  |
| 6 | 1.841040  | 4.157810  | 0.507895  |
| 6 | 1.727842  | 3.739941  | 1.873401  |
| 6 | 1.586077  | -3.253401 | -2.555961 |
| 6 | 1.431578  | -2.217918 | -3.537304 |
| 6 | 1.479121  | 1.686961  | 3.840000  |
| 6 | 1.345261  | 0.297103  | 4.180128  |
| 6 | 1.138698  | 0.539902  | -4.197323 |
| 6 | 1.006208  | 1.912686  | -3.783436 |
| 6 | 1.051811  | -2.420575 | 3.372156  |
| 6 | 0.896779  | -3.402403 | 2.326186  |
| 6 | 0.762368  | 3.859742  | -1.714576 |
| 6 | 0.649049  | 4.202123  | -0.314614 |
| 6 | 0.579390  | -4.076276 | -0.430458 |
| 6 | 0.422256  | -3.698118 | -1.817880 |
| 6 | 0.420596  | 3.445760  | 2.427831  |
| 6 | 0.300678  | 2.430458  | 3.454090  |
| 6 | 0.112688  | -1.697795 | -3.827099 |
| 6 | -0.031644 | -0.305314 | -4.200654 |
| 6 | 0.031641  | -0.307040 | 4.200530  |
| 6 | -0.112690 | -1.699369 | 3.826408  |
| 6 | -0.300678 | 2.431879  | -3.453096 |
| 6 | -0.420593 | 3.446761  | -2.426421 |
| 6 | -0.422257 | -3.698868 | 1.816369  |
| 6 | -0.579390 | -4.076454 | 0.428791  |
| 6 | -0.649045 | 4.201995  | 0.316335  |
| 6 | -0.762365 | 3.859037  | 1.716157  |
| 6 | -0.896780 | -3.401444 | -2.327574 |
| 6 | -1.051812 | -2.419187 | -3.373141 |
| 6 | -1.006208 | 1.911131  | 3.784215  |
| 6 | -1.138701 | 0.538178  | 4.197541  |
| 6 | -1.345263 | 0.298821  | -4.180002 |
| 6 | -1.479122 | 1.688541  | -3.839307 |
| 6 | -1.431580 | -2.219373 | 3.536398  |
| 6 | -1.586078 | -3.254455 | 2.554632  |
| 6 | -1.727839 | 3.740716  | -1.871870 |
| 6 | -1.841036 | 4.158023  | -0.506192 |
| 6 | -1.905673 | -4.078422 | -0.160244 |
| 6 | -2.062924 | -3.778544 | -1.552019 |
| 6 | -2.072791 | 3.571213  | 2.276975  |
| 6 | -2.192202 | 2.622997  | 3.338676  |
| 6 | -2.377589 | -1.903011 | -3.677677 |
| 6 | -2.523177 | -0.551612 | -4.119101 |
| 6 | -2.460991 | -0.067884 | 4.233566  |
| 6 | -2.605684 | -1.459634 | 3.940160  |
| 6 | -2.797716 | 2.219028  | -3.524478 |
| 6 | -2.919567 | 3.275995  | -2.567287 |
| 6 | -2.916328 | -3.572469 | 2.057230  |
| 6 | -3.072834 | -4.026349 | 0.707534  |
| 6 | -3.153540 | 4.190388  | 0.126861  |
| 6 | -3.272433 | 3.948812  | 1.542794  |
| 6 | -3.393498 | -3.512402 | -2.081257 |
| 6 | -3.554601 | -2.605691 | -3.191346 |
| 6 | -3.512728 | 2.135116  | 3.715938  |

|   |           |           |           |
|---|-----------|-----------|-----------|
| 6 | -3.642682 | 0.775695  | 4.213353  |
| 6 | -3.849620 | 0.047655  | -4.155754 |
| 6 | -3.984188 | 1.471001  | -3.889810 |
| 6 | -3.931354 | -2.002712 | 3.705643  |
| 6 | -4.086238 | -3.107614 | 2.774166  |
| 6 | -4.228786 | 3.615409  | -2.048839 |
| 6 | -4.333586 | 4.118471  | -0.692234 |
| 6 | -4.398469 | -4.080934 | 0.128064  |
| 6 | -4.547586 | -3.860564 | -1.296830 |
| 6 | -4.579676 | 3.746465  | 2.134677  |
| 6 | -4.686268 | 2.849178  | 3.302458  |
| 6 | -4.878273 | -2.146862 | -3.563194 |
| 6 | -5.014956 | -0.789449 | -4.118332 |
| 6 | -4.947012 | 0.179786  | 4.337493  |
| 6 | -5.090576 | -1.256341 | 4.116647  |
| 6 | -5.290038 | 2.031854  | -3.641704 |
| 6 | -5.414156 | 3.152519  | -2.724428 |
| 6 | -5.404425 | -3.478213 | 2.316952  |
| 6 | -5.561975 | -4.012962 | 0.978223  |
| 6 | -5.633078 | 4.202286  | -0.057761 |
| 6 | -5.728649 | 4.076850  | 1.347457  |
| 6 | -5.867461 | -3.636149 | -1.853445 |
| 6 | -6.005912 | -2.837804 | -3.009760 |
| 6 | -5.959333 | 2.359242  | 3.794742  |
| 6 | -6.083959 | 1.082477  | 4.308188  |
| 6 | -6.302098 | -0.129657 | -4.255528 |
| 6 | -6.433989 | 1.226884  | -4.043187 |
| 6 | -6.384826 | -1.897591 | 3.936233  |
| 6 | -6.533428 | -2.972735 | 3.088235  |
| 6 | -6.703738 | 3.595120  | -2.192055 |
| 6 | -6.810118 | 4.115284  | -0.926243 |
| 6 | -6.869902 | -4.158113 | 0.335096  |
| 6 | -7.017392 | -3.999781 | -1.019529 |
| 1 | 8.016024  | -4.015001 | 1.476121  |
| 1 | 7.756699  | -4.306091 | -0.966578 |
| 1 | 7.795685  | 4.351682  | 0.503707  |
| 1 | 7.610713  | 3.418507  | 2.786400  |
| 1 | 7.537519  | -3.368101 | -2.892298 |
| 1 | 7.272654  | -1.450042 | -4.403736 |
| 1 | 7.434542  | 1.676067  | 4.046073  |
| 1 | 7.200931  | -0.738717 | 4.423547  |
| 1 | 7.080632  | 0.703641  | -4.565277 |
| 1 | 6.860363  | 2.971934  | -3.653840 |
| 1 | 7.019080  | -2.569140 | 3.332925  |
| 1 | 6.729312  | 4.006758  | -1.791063 |
| 1 | -6.729308 | 4.006040  | 1.792702  |
| 1 | -7.019078 | -2.567802 | -3.333994 |
| 1 | -6.860363 | 2.970435  | 3.655044  |
| 1 | -7.080635 | 0.701770  | 4.565550  |
| 1 | -7.200936 | -0.736897 | -4.423848 |
| 1 | -7.434540 | 1.677734  | -4.045389 |
| 1 | -7.272657 | -1.451851 | 4.403141  |
| 1 | -7.537521 | -3.369296 | 2.890923  |
| 1 | -7.610710 | 3.419677  | -2.785003 |
| 1 | -7.795676 | 4.351920  | -0.501928 |
| 1 | -7.756699 | -4.306507 | 0.964809  |
| 1 | -8.016016 | -4.014427 | -1.477772 |

Nanotube (7,5) u05v09  
B3LYP/STO-3G Energy: -5209.302727

|   |          |           |           |
|---|----------|-----------|-----------|
| C | 7.132951 | 3.856287  | -0.829331 |
| C | 6.730467 | -4.452587 | 0.069322  |
| C | 6.609422 | -4.267913 | -1.285153 |
| C | 6.821974 | 3.428854  | 2.140524  |
| C | 6.655929 | 2.613779  | 3.237409  |
| C | 6.381736 | -2.441964 | -3.677067 |
| C | 6.296909 | -1.180986 | -4.228765 |

|   |           |           |           |
|---|-----------|-----------|-----------|
| C | 6.257757  | -0.157433 | 4.365623  |
| C | 6.073817  | -1.515870 | 4.199002  |
| C | 6.137156  | 1.766090  | -3.712791 |
| C | 6.057662  | 2.836986  | -2.797256 |
| C | 5.714236  | -3.789110 | 2.275396  |
| C | 5.575237  | -4.262355 | 0.951207  |
| C | 5.836617  | 3.933725  | -0.150885 |
| C | 5.692602  | 3.765146  | 1.280682  |
| C | 5.323739  | -3.917521 | -1.891385 |
| C | 5.218348  | -3.065382 | -3.062729 |
| C | 5.343585  | 2.092582  | 3.594937  |
| C | 5.154339  | 0.769996  | 4.179610  |
| C | 5.039930  | -0.451667 | -4.245702 |
| C | 4.969723  | 1.006001  | -4.055848 |
| C | 4.770142  | -2.062227 | 3.869796  |
| C | 4.599374  | -3.220480 | 2.972759  |
| C | 4.760956  | 3.252406  | -2.297457 |
| C | 4.655081  | 3.832817  | -0.974111 |
| C | 4.262348  | -4.285503 | 0.337790  |
| C | 4.139679  | -4.139399 | -1.099608 |
| C | 4.373058  | 3.578648  | 1.837162  |
| C | 4.201540  | 2.756650  | 3.023519  |
| C | 3.928578  | -2.529890 | -3.426499 |
| C | 3.842090  | -1.219068 | -4.049514 |
| C | 3.826292  | 0.217158  | 4.236045  |
| C | 3.634342  | -1.218163 | 4.108538  |
| C | 3.674407  | 1.602419  | -3.796716 |
| C | 3.575546  | 2.767661  | -2.952039 |
| C | 3.269931  | -3.512420 | 2.475270  |
| C | 3.103136  | -4.097857 | 1.168306  |
| C | 3.343489  | 3.982904  | -0.380706 |
| C | 3.203768  | 3.892892  | 1.042527  |
| C | 2.830977  | -3.885208 | -1.665578 |
| C | 2.724270  | -3.104704 | -2.861109 |
| C | 2.864175  | 2.347101  | 3.409624  |
| C | 2.677135  | 1.085467  | 4.055692  |
| C | 2.541652  | -0.573411 | -4.150626 |
| C | 2.459742  | 0.851312  | -4.071011 |
| C | 2.288432  | -1.731105 | 3.892702  |
| C | 2.105972  | -2.912256 | 3.110823  |
| C | 2.269995  | 3.215780  | -2.488847 |
| C | 2.158017  | 3.862292  | -1.216374 |
| C | 1.776370  | -4.167718 | 0.570147  |
| C | 1.641951  | -4.102351 | -0.854320 |
| C | 1.875197  | 3.765529  | 1.623585  |
| C | 1.707663  | 3.024150  | 2.839332  |
| C | 1.419742  | -2.614588 | -3.280820 |
| C | 1.330305  | -1.357832 | -3.970513 |
| C | 1.332839  | 0.545774  | 4.198397  |
| C | 1.140294  | -0.878902 | 4.159125  |
| C | 1.162983  | 1.485700  | -3.890894 |
| C | 1.071154  | 2.705324  | -3.128321 |
| C | 0.770599  | -3.278426 | 2.664678  |
| C | 0.606079  | -3.953091 | 1.399147  |
| C | 0.846606  | 4.064025  | -0.626700 |
| C | 0.709614  | 4.055516  | 0.812671  |
| C | 0.331852  | -3.897665 | -1.442828 |
| C | 0.223222  | -3.177761 | -2.693422 |
| C | 0.377872  | 2.651221  | 3.273610  |
| C | 0.193036  | 1.411285  | 3.999893  |
| C | 0.040350  | -0.722165 | -4.130802 |
| C | -0.040358 | 0.723156  | -4.130639 |
| C | -0.193047 | -1.412248 | 3.999560  |
| C | -0.377881 | -2.652017 | 3.272984  |
| C | -0.223221 | 3.178410  | -2.692676 |
| C | -0.331848 | 3.898016  | -1.441907 |
| C | -0.709611 | -4.055729 | 0.811713  |
| C | -0.846601 | -4.063892 | -0.627668 |
| C | -0.606078 | 3.952753  | 1.400082  |
| C | -0.770602 | 3.277782  | 2.665455  |



|   |           |           |           |
|---|-----------|-----------|-----------|
| C | -1.071153 | -2.704579 | -3.128955 |
| C | -1.162985 | -1.484765 | -3.891238 |
| C | -1.140304 | 0.877904  | 4.159327  |
| C | -1.332847 | -0.546788 | 4.198264  |
| C | -1.330308 | 1.358784  | -3.970197 |
| C | -1.419740 | 2.615389  | -3.280209 |
| C | -1.707665 | -3.024846 | 2.838615  |
| C | -1.875195 | -3.765944 | 1.622690  |
| C | -1.641939 | 4.102575  | -0.853351 |
| C | -1.776358 | 4.167596  | 0.571137  |
| C | -2.158011 | -3.862023 | -1.217292 |
| C | -2.269988 | -3.215191 | -2.489606 |
| C | -2.105976 | 2.911504  | 3.111503  |
| C | -2.288435 | 1.730166  | 3.893092  |
| C | -2.459743 | -0.850333 | -4.071185 |
| C | -2.541655 | 0.574404  | -4.150464 |
| C | -2.677141 | -1.086443 | 4.055411  |
| C | -2.864180 | -2.347923 | 3.409053  |
| C | -2.724262 | 3.105405  | -2.860367 |
| C | -2.830967 | 3.885631  | -1.664661 |
| C | -3.203766 | -3.893173 | 1.041599  |
| C | -3.343485 | -3.982843 | -0.381653 |
| C | -3.103128 | 4.097593  | 1.169277  |
| C | -3.269932 | 3.511826  | 2.476082  |
| C | -3.575545 | -2.766959 | -2.952686 |
| C | -3.674411 | -1.601508 | -3.797064 |
| C | -3.634354 | 1.217173  | 4.108788  |
| C | -3.826302 | -0.218171 | 4.235957  |
| C | -3.842097 | 1.220037  | -4.049180 |
| C | -3.928583 | 2.530718  | -3.425881 |
| C | -4.201548 | -2.757388 | 3.022852  |
| C | -4.373064 | -3.579122 | 1.836310  |
| C | -4.139671 | 4.139718  | -1.098629 |
| C | -4.262338 | 4.285480  | 0.338802  |
| C | -4.655079 | -3.832627 | -0.975026 |
| C | -4.760953 | -3.251882 | -2.298233 |
| C | -4.599386 | 3.219778  | 2.973496  |
| C | -4.770150 | 2.061295  | 3.870252  |
| C | -4.969730 | -1.005039 | -4.056052 |
| C | -5.039941 | 0.452688  | -4.245541 |
| C | -5.154347 | -0.770995 | 4.179397  |
| C | -5.343594 | -2.093460 | 3.594419  |
| C | -5.218344 | 3.066139  | -3.061983 |
| C | -5.323724 | 3.918045  | -1.890457 |
| C | -5.692603 | -3.765503 | 1.279788  |
| C | -5.836613 | -3.933744 | -0.151830 |
| C | -5.575219 | 4.262189  | 0.952207  |
| C | -5.714227 | 3.788596  | 2.276281  |
| C | -6.057656 | -2.836347 | -2.797928 |
| C | -6.137150 | -1.765213 | -3.713193 |
| C | -6.073823 | 1.514865  | 4.199291  |
| C | -6.257764 | 0.156382  | 4.365594  |
| C | -6.296913 | 1.181977  | -4.228384 |
| C | -6.381740 | 2.442843  | -3.676403 |
| C | -6.655936 | -2.614572 | 3.236768  |
| C | -6.821979 | -3.429405 | 2.139700  |
| C | -6.609410 | 4.268350  | -1.284144 |
| C | -6.730452 | 4.452670  | 0.070357  |
| C | -7.132944 | -3.856138 | -0.830258 |
| C | -7.240866 | -3.352166 | -2.101236 |
| H | 8.227581  | 3.209050  | -2.562261 |
| H | 8.039818  | 4.123593  | -0.271551 |
| H | 7.717272  | -4.618164 | 0.523508  |
| H | 7.505542  | -4.291206 | -1.918731 |
| H | 7.834131  | 3.722756  | 1.834473  |
| H | 7.537903  | 2.268154  | 3.792059  |
| H | 7.363433  | -2.923029 | -3.580103 |
| H | 7.213449  | -0.677618 | -4.562854 |
| H | 7.273567  | 0.235185  | 4.502186  |
| H | 6.947652  | -2.180189 | 4.207528  |

|   |           |           |           |
|---|-----------|-----------|-----------|
| H | 7.130717  | 1.378733  | -3.972081 |
| H | 6.728407  | -3.651494 | 2.671573  |
| H | -6.728408 | 3.650894  | 2.672408  |
| H | -7.130715 | -1.377798 | -3.972381 |
| H | -6.947672 | 2.179167  | 4.207912  |
| H | -7.273587 | -0.236262 | 4.501998  |
| H | -7.213475 | 0.678658  | -4.562483 |
| H | -7.363450 | 2.923838  | -3.579255 |
| H | -7.537913 | -2.269076 | 3.791493  |
| H | -7.834137 | -3.723239 | 1.833580  |
| H | -7.505497 | 4.291908  | -1.917767 |
| H | -7.717227 | 4.618243  | 0.524604  |
| H | -8.039810 | -4.123584 | -0.272546 |
| H | -8.227571 | -3.208463 | -2.563033 |

Nanotube (7,5) u05v10  
B3LYP/STO-3G Energy: -5284.595426

|   |           |           |           |
|---|-----------|-----------|-----------|
| C | -7.144222 | -3.730230 | -1.656649 |
| C | -6.963503 | 4.075436  | 1.337548  |
| C | -6.878100 | 4.248131  | -0.020907 |
| C | -6.747618 | -4.069109 | 1.315028  |
| C | -6.570168 | -3.557049 | 2.580188  |
| C | -6.668589 | 3.108735  | -2.807487 |
| C | -6.563665 | 2.036298  | -3.666803 |
| C | -6.222101 | -1.155373 | 4.374616  |
| C | -6.086699 | 0.206019  | 4.559965  |
| C | -6.303067 | -0.936902 | -3.928537 |
| C | -6.163576 | -2.202194 | -3.321816 |
| C | -5.860006 | 2.908495  | 3.276863  |
| C | -5.776399 | 3.708894  | 2.116275  |
| C | -5.824358 | -3.931381 | -1.052149 |
| C | -5.637795 | -4.129191 | 0.369715  |
| C | -5.601147 | 4.111854  | -0.724750 |
| C | -5.505438 | 3.593883  | -2.076580 |
| C | -5.263382 | -3.093370 | 3.027270  |
| C | -5.096522 | -1.960138 | 3.928355  |
| C | -5.286310 | 1.380448  | -3.897355 |
| C | -5.168234 | -0.071930 | -4.091636 |
| C | -4.811878 | 0.868974  | 4.352858  |
| C | -4.706044 | 2.223460  | 3.781544  |
| C | -4.839377 | -2.685889 | -2.977818 |
| C | -4.673581 | -3.581006 | -1.851556 |
| C | -4.483817 | 3.938313  | 1.500998  |
| C | -4.400133 | 4.168370  | 0.072358  |
| C | -4.306108 | -4.041078 | 0.923390  |
| C | -4.120415 | -3.543676 | 2.275908  |
| C | -4.211473 | 3.217080  | -2.594024 |
| C | -4.105442 | 2.114766  | -3.536263 |
| C | -3.784988 | -1.389458 | 4.094935  |
| C | -3.642498 | 0.036026  | 4.340433  |
| C | -3.849011 | -0.668238 | -4.027086 |
| C | -3.690079 | -2.008168 | -3.515392 |
| C | -3.402622 | 2.685175  | 3.348481  |
| C | -3.294487 | 3.590761  | 2.231474  |
| C | -3.339586 | -3.831035 | -1.349249 |
| C | -3.155024 | -4.099474 | 0.046629  |
| C | -3.102600 | 4.115783  | -0.567877 |
| C | -3.008582 | 3.670291  | -1.925583 |
| C | -2.784450 | -3.194691 | 2.721242  |
| C | -2.615689 | -2.135731 | 3.667689  |
| C | -2.791203 | 1.563947  | -3.828620 |
| C | -2.665855 | 0.171315  | -4.123849 |
| C | -2.321448 | 0.638979  | 4.236480  |
| C | -2.201305 | 1.988253  | 3.783684  |
| C | -2.358898 | -2.513767 | -3.215927 |
| C | -2.186883 | -3.459764 | -2.155652 |
| C | -1.990004 | 3.860750  | 1.642546  |
| C | -1.896538 | 4.162751  | 0.246484  |

|   |           |           |           |
|---|-----------|-----------|-----------|
| C | -1.812561 | -4.072019 | 0.607711  |
| C | -1.627364 | -3.655978 | 1.966945  |
| C | -1.702940 | 3.349720  | -2.483971 |
| C | -1.597233 | 2.317690  | -3.475439 |
| C | -1.285486 | -1.598938 | 3.913290  |
| C | -1.138749 | -0.208150 | 4.245160  |
| C | -1.345908 | -0.441458 | -4.144086 |
| C | -1.195358 | -1.812057 | -3.729832 |
| C | -0.892753 | 2.508493  | 3.418873  |
| C | -0.788107 | 3.487837  | 2.365755  |
| C | -0.851089 | -3.758626 | -1.669667 |
| C | -0.666180 | -4.105447 | -0.280177 |
| C | -0.598356 | 4.162045  | -0.402828 |
| C | -0.505548 | 3.787289  | -1.796780 |
| C | -0.295432 | -3.351898 | 2.447932  |
| C | -0.125251 | -2.336967 | 3.465823  |
| C | -0.294297 | 1.791735  | -3.823245 |
| C | -0.171980 | 0.400279  | -4.203574 |
| C | 0.171983  | 0.400629  | 4.203540  |
| C | 0.294298  | 1.792053  | 3.823096  |
| C | 0.125253  | -2.337256 | -3.465632 |
| C | 0.295432  | -3.352104 | -2.447657 |
| C | 0.505545  | 3.787440  | 1.796466  |
| C | 0.598353  | 4.162080  | 0.402484  |
| C | 0.666177  | -4.105425 | 0.280515  |
| C | 0.851088  | -3.758486 | 1.669976  |
| C | 0.788106  | 3.487641  | -2.366044 |
| C | 0.892754  | 2.508209  | -3.419080 |
| C | 1.195360  | -1.811745 | 3.729979  |
| C | 1.345911  | -0.441112 | 4.144119  |
| C | 1.138752  | -0.208503 | -4.245140 |
| C | 1.285488  | -1.599265 | -3.913157 |
| C | 1.597234  | 2.317981  | 3.475245  |
| C | 1.702939  | 3.349930  | 2.483694  |
| C | 1.627363  | -3.656145 | -1.966644 |
| C | 1.812558  | -4.072073 | -0.607376 |
| C | 1.896534  | 4.162735  | -0.246829 |
| C | 1.990002  | 3.860617  | -1.642865 |
| C | 2.186882  | -3.459585 | 2.155935  |
| C | 2.358899  | -2.513498 | 3.216130  |
| C | 2.201308  | 1.987939  | -3.783845 |
| C | 2.321452  | 0.638626  | -4.236527 |
| C | 2.665858  | 0.171660  | 4.123829  |
| C | 2.791205  | 1.564268  | 3.828487  |
| C | 2.615690  | -2.136038 | -3.667511 |
| C | 2.784450  | -3.194922 | -2.720978 |
| C | 3.008579  | 3.670458  | 1.925279  |
| C | 3.102596  | 4.115839  | 0.567537  |
| C | 3.155022  | -4.099483 | -0.046291 |
| C | 3.339584  | -3.830926 | 1.349564  |
| C | 3.294486  | 3.590580  | -2.231769 |
| C | 3.402625  | 2.684898  | -3.348698 |
| C | 3.690080  | -2.007874 | 3.515551  |
| C | 3.849013  | -0.667901 | 4.027132  |
| C | 3.642502  | 0.035664  | -4.340427 |
| C | 3.784990  | -1.389800 | -4.094815 |
| C | 4.105443  | 2.115065  | 3.536084  |
| C | 4.211472  | 3.217303  | 2.593757  |
| C | 4.120414  | -3.543873 | -2.275616 |
| C | 4.306106  | -4.041164 | -0.923057 |
| C | 4.400129  | 4.168377  | -0.072701 |
| C | 4.483815  | 3.938198  | -1.501322 |
| C | 4.673580  | -3.580856 | 1.851849  |
| C | 4.839378  | -2.685642 | 2.978033  |
| C | 4.706048  | 2.223143  | -3.781715 |
| C | 4.811882  | 0.868609  | -4.352918 |
| C | 5.168237  | -0.071587 | 4.091630  |
| C | 5.286311  | 1.380776  | 3.897232  |
| C | 5.096524  | -1.960469 | -3.928189 |
| C | 5.263382  | -3.093631 | -3.027014 |

|   |           |           |           |
|---|-----------|-----------|-----------|
| C | 5.505436  | 3.594068  | 2.076284  |
| C | 5.601143  | 4.111932  | 0.724412  |
| C | 5.637792  | -4.129233 | -0.369376 |
| C | 5.824357  | -3.931302 | 1.052472  |
| C | 5.776398  | 3.708722  | -2.116574 |
| C | 5.860012  | 2.908212  | -3.277083 |
| C | 6.163576  | -2.201918 | 3.321988  |
| C | 6.303069  | -0.936573 | 3.928600  |
| C | 6.086702  | 0.205637  | -4.559969 |
| C | 6.222102  | -1.155741 | -4.374513 |
| C | 6.563666  | 2.036611  | 3.666628  |
| C | 6.668586  | 3.108981  | 2.807229  |
| C | 6.570166  | -3.557279 | -2.579897 |
| C | 6.747616  | -4.069235 | -1.314694 |
| C | 6.878097  | 4.248155  | 0.020561  |
| C | 6.963501  | 4.075337  | -1.337878 |
| C | 7.144220  | -3.730103 | 1.656955  |
| C | 7.308234  | -2.922135 | 2.752711  |
| H | -8.313213 | -2.701653 | -3.138265 |
| H | -8.024124 | -4.164618 | -1.164625 |
| H | -7.940517 | 4.083238  | 1.840460  |
| H | -7.793214 | 4.400243  | -0.607801 |
| H | -7.759655 | -4.314868 | 0.968766  |
| H | -7.443053 | -3.400886 | 3.227225  |
| H | -7.660102 | 3.515246  | -2.570378 |
| H | -7.474189 | 1.604341  | -4.102037 |
| H | -7.219831 | -1.609440 | 4.429760  |
| H | -6.980058 | 0.811506  | 4.760783  |
| H | -7.314906 | -0.531615 | -4.056692 |
| H | -6.856577 | 2.635564  | 3.646821  |
| H | 6.856586  | 2.635221  | -3.646992 |
| H | 7.314908  | -0.531276 | 4.056721  |
| H | 6.980061  | 0.811107  | -4.760835 |
| H | 7.219831  | -1.609812 | -4.429623 |
| H | 7.474190  | 1.604690  | 4.101897  |
| H | 7.660100  | 3.515475  | 2.570089  |
| H | 7.443052  | -3.401171 | -3.226947 |
| H | 7.759652  | -4.314965 | -0.968411 |
| H | 7.793209  | 4.400319  | 0.607442  |
| H | 7.940514  | 4.083093  | -1.840791 |
| H | 8.024121  | -4.164536 | 1.164971  |
| H | 8.313212  | -2.701400 | 3.138484  |

Nanotube (7,5) u05v11  
B3LYP/STO-3G Energy: -5359.897538

|   |           |          |           |
|---|-----------|----------|-----------|
| 6 | 2.065684  | 7.301269 | -3.619732 |
| 6 | 1.085873  | 7.760162 | -2.761457 |
| 6 | 6.812827  | 4.110699 | 2.187571  |
| 6 | 7.185110  | 3.730266 | 0.911260  |
| 6 | 0.000888  | 8.082341 | 0.031135  |
| 6 | 0.075290  | 7.876258 | 1.402921  |
| 6 | 6.692161  | 3.683720 | -2.062754 |
| 6 | 5.920902  | 4.005577 | -3.176588 |
| 6 | 1.499952  | 6.651745 | 3.763567  |
| 6 | 2.517912  | 5.868064 | 4.308372  |
| 6 | 3.398992  | 5.249213 | -4.217614 |
| 6 | 2.145642  | 5.889406 | -3.957280 |
| 6 | 4.881271  | 4.085908 | 3.805987  |
| 6 | 5.746191  | 3.412292 | 2.881809  |
| 6 | 0.090833  | 6.860808 | -2.204910 |
| 6 | -0.462212 | 7.039854 | -0.851669 |
| 6 | 6.552055  | 2.608625 | 0.245559  |
| 6 | 6.338010  | 2.577205 | -1.214370 |
| 6 | -0.334968 | 6.627383 | 1.991445  |
| 6 | 0.338929  | 6.046460 | 3.174987  |
| 6 | 4.766427  | 3.228817 | -3.531982 |
| 6 | 3.534825  | 3.845516 | -4.103516 |
| 6 | 2.425614  | 4.437799 | 4.327735  |

|   |           |           |           |
|---|-----------|-----------|-----------|
| 6 | 3.613874  | 3.554829  | 4.133978  |
| 6 | 0.983944  | 5.078159  | -3.698389 |
| 6 | -0.066544 | 5.580647  | -2.833501 |
| 6 | 5.362931  | 2.118502  | 2.379247  |
| 6 | 5.790420  | 1.703675  | 1.057695  |
| 6 | -1.191926 | 5.954664  | -0.252432 |
| 6 | -1.147144 | 5.760837  | 1.183618  |
| 6 | 5.427099  | 1.605151  | -1.759796 |
| 6 | 4.652677  | 1.923558  | -2.942107 |
| 6 | 0.083971  | 4.670174  | 3.505941  |
| 6 | 1.123383  | 3.866147  | 4.113432  |
| 6 | 2.324450  | 3.037404  | -4.138457 |
| 6 | 1.038968  | 3.665317  | -3.995166 |
| 6 | 3.373634  | 2.142765  | 3.864635  |
| 6 | 4.286168  | 1.407019  | 3.031053  |
| 6 | -1.088988 | 4.656024  | -2.368574 |
| 6 | -1.688765 | 4.865173  | -1.082329 |
| 6 | 5.179915  | 0.522302  | 0.465678  |
| 6 | 5.030966  | 0.451986  | -0.961742 |
| 6 | -1.672446 | 4.523220  | 1.746919  |
| 6 | -1.078669 | 3.991991  | 2.945839  |
| 6 | 3.563174  | 1.033921  | -3.334056 |
| 6 | 2.402469  | 1.594817  | -3.987595 |
| 6 | 0.926694  | 2.424649  | 4.227679  |
| 6 | 2.080051  | 1.551895  | 4.151507  |
| 6 | -0.149419 | 2.850534  | -3.810590 |
| 6 | -1.248337 | 3.374309  | -3.018733 |
| 6 | 3.942776  | 0.070046  | 2.584793  |
| 6 | 4.433505  | -0.392069 | 1.295610  |
| 6 | -2.499759 | 3.823402  | -0.497100 |
| 6 | -2.520953 | 3.673897  | 0.951809  |
| 6 | 4.198686  | -0.572185 | -1.540608 |
| 6 | 3.477622  | -0.284942 | -2.774962 |
| 6 | -1.395472 | 2.652895  | 3.364027  |
| 6 | -0.380811 | 1.865182  | 4.055259  |
| 6 | 1.211150  | 0.797428  | -4.122027 |
| 6 | -0.090833 | 1.442683  | -4.074992 |
| 6 | 1.885048  | 0.137761  | 3.971467  |
| 6 | 2.855551  | -0.626159 | 3.207270  |
| 6 | -2.290521 | 2.482698  | -2.580283 |
| 6 | -2.950472 | 2.729835  | -1.315710 |
| 6 | 3.864547  | -1.577805 | 0.708067  |
| 6 | 3.776512  | -1.685916 | -0.730511 |
| 6 | -3.061139 | 2.468418  | 1.528865  |
| 6 | -2.518476 | 1.970212  | 2.770696  |
| 6 | 2.410015  | -1.169202 | -3.187810 |
| 6 | 1.282201  | -0.631066 | -3.905449 |
| 6 | -0.573476 | 0.436191  | 4.196553  |
| 6 | 0.573476  | -0.436191 | 4.196553  |
| 6 | -1.282201 | 0.631066  | -3.905449 |
| 6 | -2.410015 | 1.169202  | -3.187810 |
| 6 | 2.518476  | -1.970212 | 2.770696  |
| 6 | 3.061139  | -2.468418 | 1.528865  |
| 6 | -3.776512 | 1.685916  | -0.730511 |
| 6 | -3.864547 | 1.577805  | 0.708067  |
| 6 | 2.950472  | -2.729835 | -1.315710 |
| 6 | 2.290521  | -2.482698 | -2.580283 |
| 6 | -2.855551 | 0.626159  | 3.207270  |
| 6 | -1.885048 | -0.137761 | 3.971467  |
| 6 | 0.090833  | -1.442683 | -4.074992 |
| 6 | -1.211150 | -0.797428 | -4.122027 |
| 6 | 0.380811  | -1.865182 | 4.055259  |
| 6 | 1.395472  | -2.652895 | 3.364027  |
| 6 | -3.477622 | 0.284942  | -2.774962 |
| 6 | -4.198686 | 0.572185  | -1.540608 |
| 6 | 2.520953  | -3.673897 | 0.951809  |
| 6 | 2.499759  | -3.823402 | -0.497100 |
| 6 | -4.433505 | 0.392069  | 1.295610  |
| 6 | -3.942776 | -0.070046 | 2.584793  |
| 6 | 1.248337  | -3.374309 | -3.018733 |

|   |           |           |           |
|---|-----------|-----------|-----------|
| 6 | 0.149419  | -2.850534 | -3.810590 |
| 6 | -2.080051 | -1.551895 | 4.151507  |
| 6 | -0.926694 | -2.424649 | 4.227679  |
| 6 | -2.402469 | -1.594817 | -3.987595 |
| 6 | -3.563174 | -1.033921 | -3.334056 |
| 6 | 1.078669  | -3.991991 | 2.945839  |
| 6 | 1.672446  | -4.523220 | 1.746919  |
| 6 | -5.030966 | -0.451986 | -0.961742 |
| 6 | -5.179915 | -0.522302 | 0.465678  |
| 6 | 1.688765  | -4.865173 | -1.082329 |
| 6 | 1.088988  | -4.656024 | -2.368574 |
| 6 | -4.286168 | -1.407019 | 3.031053  |
| 6 | -3.373634 | -2.142765 | 3.864635  |
| 6 | -1.038968 | -3.665317 | -3.995166 |
| 6 | -2.324450 | -3.037404 | -4.138457 |
| 6 | -1.123383 | -3.866147 | 4.113432  |
| 6 | -0.083971 | -4.670174 | 3.505941  |
| 6 | -4.652677 | -1.923558 | -2.942107 |
| 6 | -5.427099 | -1.605151 | -1.759796 |
| 6 | 1.147144  | -5.760837 | 1.183618  |
| 6 | 1.191926  | -5.954664 | -0.252432 |
| 6 | -5.790420 | -1.703675 | 1.057695  |
| 6 | -5.362931 | -2.118502 | 2.379247  |
| 6 | 0.066544  | -5.580647 | -2.833501 |
| 6 | -0.983944 | -5.078159 | -3.698389 |
| 6 | -3.613874 | -3.554829 | 4.133978  |
| 6 | -2.425614 | -4.437799 | 4.327735  |
| 6 | -3.534825 | -3.845516 | -4.103516 |
| 6 | -4.766427 | -3.228817 | -3.531982 |
| 6 | -0.338929 | -6.046460 | 3.174987  |
| 6 | 0.334968  | -6.627383 | 1.991445  |
| 6 | -6.338010 | -2.577205 | -1.214370 |
| 6 | -6.552055 | -2.608625 | 0.245559  |
| 6 | 0.462212  | -7.039854 | -0.851669 |
| 6 | -0.090833 | -6.860808 | -2.204910 |
| 6 | -5.746191 | -3.412292 | 2.881809  |
| 6 | -4.881271 | -4.085908 | 3.805987  |
| 6 | -2.145642 | -5.889406 | -3.957280 |
| 6 | -3.398992 | -5.249213 | -4.217614 |
| 6 | -2.517912 | -5.868064 | 4.308372  |
| 6 | -1.499952 | -6.651745 | 3.763567  |
| 6 | -5.920902 | -4.005577 | -3.176588 |
| 6 | -6.692161 | -3.683720 | -2.062754 |
| 6 | -0.075290 | -7.876258 | 1.402921  |
| 6 | -0.000888 | -8.082341 | 0.031135  |
| 6 | -7.185110 | -3.730266 | 0.911260  |
| 6 | -6.812827 | -4.110699 | 2.187571  |
| 6 | -1.085873 | -7.760162 | -2.761457 |
| 6 | -2.065684 | -7.301269 | -3.619732 |
| 1 | 2.876093  | 7.969788  | -3.940924 |
| 1 | 1.123904  | 8.798823  | -2.408866 |
| 1 | 7.220810  | 5.029763  | 2.629790  |
| 1 | 7.892779  | 4.354723  | 0.350963  |
| 1 | 0.437775  | 8.994966  | -0.393359 |
| 1 | 0.570629  | 8.630734  | 2.027602  |
| 1 | 7.482990  | 4.376334  | -1.748462 |
| 1 | 6.124909  | 4.944875  | -3.706710 |
| 1 | 1.670383  | 7.729078  | 3.643250  |
| 1 | 3.458644  | 6.353935  | 4.597934  |
| 1 | 4.293622  | 5.883863  | -4.253389 |
| 1 | 5.115526  | 5.130512  | 4.046994  |
| 1 | -5.115526 | -5.130512 | 4.046994  |
| 1 | -4.293622 | -5.883863 | -4.253389 |
| 1 | -3.458644 | -6.353935 | 4.597934  |
| 1 | -1.670383 | -7.729078 | 3.643250  |
| 1 | -6.124909 | -4.944875 | -3.706710 |
| 1 | -7.482990 | -4.376334 | -1.748462 |
| 1 | -0.570629 | -8.630734 | 2.027602  |
| 1 | -0.437775 | -8.994966 | -0.393359 |
| 1 | -7.892779 | -4.354723 | 0.350963  |

|   |           |           |           |
|---|-----------|-----------|-----------|
| 1 | -7.220810 | -5.029763 | 2.629790  |
| 1 | -1.123904 | -8.798823 | -2.408866 |
| 1 | -2.876093 | -7.969788 | -3.940924 |

Nanotube (7,5) u06v00  
B3LYP/STO-3G Energy: -5435.197388

|   |           |           |           |
|---|-----------|-----------|-----------|
| 6 | -7.551063 | -1.060819 | -3.784098 |
| 6 | -7.405196 | -2.318857 | -3.234696 |
| 6 | -7.073712 | 2.956428  | 3.257015  |
| 6 | -6.987877 | 3.786167  | 2.155638  |
| 6 | -7.014665 | -4.095584 | -0.832354 |
| 6 | -6.824225 | -4.285759 | 0.529684  |
| 6 | -6.796841 | 4.183547  | -0.826860 |
| 6 | -6.711306 | 3.674114  | -2.118632 |
| 6 | -6.423209 | -3.105702 | 3.276301  |
| 6 | -6.261080 | -2.009246 | 4.121956  |
| 6 | -6.506794 | 1.230520  | -3.841754 |
| 6 | -6.396914 | -0.191530 | -3.949806 |
| 6 | -5.988402 | 0.970438  | 4.364836  |
| 6 | -5.896999 | 2.259360  | 3.747901  |
| 6 | -6.100289 | -2.823888 | -2.844267 |
| 6 | -5.916655 | -3.718772 | -1.690085 |
| 6 | -5.723391 | 4.013570  | 1.480529  |
| 6 | -5.637219 | 4.233339  | 0.025578  |
| 6 | -5.520422 | -4.141318 | 1.126595  |
| 6 | -5.326617 | -3.597806 | 2.488985  |
| 6 | -5.461064 | 3.208312  | -2.653854 |
| 6 | -5.371644 | 2.027334  | -3.558702 |
| 6 | -4.990621 | -1.356815 | 4.258426  |
| 6 | -4.862048 | 0.118507  | 4.440062  |
| 6 | -5.092739 | -0.801269 | -3.893966 |
| 6 | -4.947640 | -2.142284 | -3.359838 |
| 6 | -4.610846 | 2.737646  | 3.309272  |
| 6 | -4.526453 | 3.642395  | 2.178987  |
| 6 | -4.588825 | -3.924550 | -1.177163 |
| 6 | -4.391067 | -4.160723 | 0.239805  |
| 6 | -4.353734 | 4.121855  | -0.616644 |
| 6 | -4.266480 | 3.626977  | -1.976046 |
| 6 | -4.006409 | -3.188947 | 2.885499  |
| 6 | -3.835594 | -2.078928 | 3.799369  |
| 6 | -4.056480 | 1.450697  | -3.795216 |
| 6 | -3.923891 | 0.037364  | -4.024370 |
| 6 | -3.543544 | 0.712229  | 4.267911  |
| 6 | -3.420919 | 2.050573  | 3.756326  |
| 6 | -3.611309 | -2.633702 | -3.061908 |
| 6 | -3.431915 | -3.565388 | -1.986457 |
| 6 | -3.222317 | 3.897111  | 1.585379  |
| 6 | -3.135682 | 4.176949  | 0.180184  |
| 6 | -3.039544 | -4.106710 | 0.783461  |
| 6 | -2.846155 | -3.653505 | 2.134252  |
| 6 | -2.955370 | 3.281488  | -2.519086 |
| 6 | -2.857505 | 2.209096  | -3.481748 |
| 6 | -2.498115 | -1.531137 | 4.004270  |
| 6 | -2.355110 | -0.122186 | 4.294526  |
| 6 | -2.605484 | -0.573343 | -4.044869 |
| 6 | -2.456433 | -1.946270 | -3.597172 |
| 6 | -2.115901 | 2.567491  | 3.382771  |
| 6 | -2.022744 | 3.537447  | 2.305561  |
| 6 | -2.099096 | -3.856005 | -1.510857 |
| 6 | -1.904126 | -4.170774 | -0.102049 |
| 6 | -1.847571 | 4.163575  | -0.470458 |
| 6 | -1.763653 | 3.739046  | -1.862735 |
| 6 | -1.520024 | -3.336229 | 2.595863  |
| 6 | -1.346862 | -2.275752 | 3.582154  |
| 6 | -1.563760 | 1.668412  | -3.811180 |
| 6 | -1.441034 | 0.257788  | -4.141737 |
| 6 | -1.052572 | 0.486776  | 4.221195  |

|   |           |           |           |
|---|-----------|-----------|-----------|
| 6 | -0.932995 | 1.872031  | 3.798082  |
| 6 | -1.139272 | -2.464662 | -3.334012 |
| 6 | -0.962398 | -3.460639 | -2.297939 |
| 6 | -0.735799 | 3.829864  | 1.727702  |
| 6 | -0.650107 | 4.179741  | 0.326527  |
| 6 | -0.573213 | -4.150915 | 0.447817  |
| 6 | -0.379271 | -3.762321 | 1.825141  |
| 6 | -0.470118 | 3.415060  | -2.422047 |
| 6 | -0.371902 | 2.396652  | -3.437217 |
| 6 | -0.023511 | -1.739055 | 3.813366  |
| 6 | 0.125092  | -0.353100 | 4.178516  |
| 6 | -0.125091 | -0.353093 | -4.178516 |
| 6 | 0.023512  | -1.739048 | -3.813368 |
| 6 | 0.371902  | 2.396647  | 3.437221  |
| 6 | 0.470118  | 3.415056  | 2.422052  |
| 6 | 0.379270  | -3.762318 | -1.825146 |
| 6 | 0.573212  | -4.150915 | -0.447823 |
| 6 | 0.650106  | 4.179743  | -0.326520 |
| 6 | 0.735798  | 3.829868  | -1.727696 |
| 6 | 0.962397  | -3.460643 | 2.297934  |
| 6 | 1.139272  | -2.464668 | 3.334008  |
| 6 | 0.932995  | 1.872037  | -3.798079 |
| 6 | 1.052573  | 0.486783  | -4.221193 |
| 6 | 1.441035  | 0.257781  | 4.141737  |
| 6 | 1.563761  | 1.668406  | 3.811182  |
| 6 | 1.346862  | -2.275746 | -3.582156 |
| 6 | 1.520024  | -3.336225 | -2.595867 |
| 6 | 1.763651  | 3.739044  | 1.862742  |
| 6 | 1.847570  | 4.163576  | 0.470465  |
| 6 | 1.904125  | -4.170776 | 0.102043  |
| 6 | 2.099096  | -3.856009 | 1.510851  |
| 6 | 2.022743  | 3.537452  | -2.305555 |
| 6 | 2.115901  | 2.567497  | -3.382766 |
| 6 | 2.456433  | -1.946277 | 3.597168  |
| 6 | 2.605485  | -0.573349 | 4.044867  |
| 6 | 2.355111  | -0.122179 | -4.294524 |
| 6 | 2.498116  | -1.531131 | -4.004270 |
| 6 | 2.857505  | 2.209091  | 3.481750  |
| 6 | 2.955370  | 3.281485  | 2.519091  |
| 6 | 2.846155  | -3.653503 | -2.134257 |
| 6 | 3.039543  | -4.106711 | -0.783467 |
| 6 | 3.135680  | 4.176952  | -0.180177 |
| 6 | 3.222316  | 3.897116  | -1.585373 |
| 6 | 3.431914  | -3.565393 | 1.986451  |
| 6 | 3.611309  | -2.633707 | 3.061903  |
| 6 | 3.420919  | 2.050580  | -3.756321 |
| 6 | 3.543546  | 0.712236  | -4.267906 |
| 6 | 3.923893  | 0.037357  | 4.024367  |
| 6 | 4.056481  | 1.450692  | 3.795215  |
| 6 | 3.835594  | -2.078922 | -3.799369 |
| 6 | 4.006409  | -3.188944 | -2.885502 |
| 6 | 4.266479  | 3.626976  | 1.976052  |
| 6 | 4.353733  | 4.121858  | 0.616651  |
| 6 | 4.391066  | -4.160727 | -0.239812 |
| 6 | 4.588824  | -3.924555 | 1.177157  |
| 6 | 4.526452  | 3.642402  | -2.178980 |
| 6 | 4.610846  | 2.737653  | -3.309266 |
| 6 | 4.947641  | -2.142290 | 3.359831  |
| 6 | 5.092740  | -0.801275 | 3.893960  |
| 6 | 4.862050  | 0.118514  | -4.440057 |
| 6 | 4.990622  | -1.356809 | -4.258424 |
| 6 | 5.371644  | 2.027330  | 3.558703  |
| 6 | 5.461063  | 3.208310  | 2.653858  |
| 6 | 5.326617  | -3.597805 | -2.488990 |
| 6 | 5.520421  | -4.141322 | -1.126601 |
| 6 | 5.637218  | 4.233344  | -0.025572 |
| 6 | 5.723390  | 4.013577  | -1.480523 |
| 6 | 5.916655  | -3.718778 | 1.690078  |
| 6 | 6.100289  | -2.823893 | 2.844259  |
| 6 | 5.896999  | 2.259367  | -3.747895 |



|   |           |           |           |
|---|-----------|-----------|-----------|
| 6 | 5.988404  | 0.970445  | -4.364829 |
| 6 | 6.396916  | -0.191536 | 3.949800  |
| 6 | 6.506796  | 1.230514  | 3.841751  |
| 6 | 6.261080  | -2.009241 | -4.121956 |
| 6 | 6.423209  | -3.105700 | -3.276304 |
| 6 | 6.711306  | 3.674114  | 2.118637  |
| 6 | 6.796840  | 4.183551  | 0.826867  |
| 6 | 6.824224  | -4.285767 | -0.529691 |
| 6 | 7.014664  | -4.095592 | 0.832347  |
| 6 | 6.987876  | 3.786177  | -2.155632 |
| 6 | 7.073712  | 2.956437  | -3.257009 |
| 6 | 7.405197  | -2.318862 | 3.234685  |
| 6 | 7.551065  | -1.060824 | 3.784088  |
| 1 | -8.553772 | -0.651324 | -3.969246 |
| 1 | -8.299981 | -2.905452 | -2.989628 |
| 1 | -8.054595 | 2.706533  | 3.684601  |
| 1 | -7.908208 | 4.193306  | 1.717400  |
| 1 | -8.037285 | -4.090148 | -1.230585 |
| 1 | -7.701027 | -4.424351 | 1.175309  |
| 1 | -7.786903 | 4.405692  | -0.408675 |
| 1 | -7.637409 | 3.505510  | -2.683354 |
| 1 | -7.435495 | -3.490047 | 3.096868  |
| 1 | -7.151728 | -1.561453 | 4.581594  |
| 1 | -7.513122 | 1.653935  | -3.728921 |
| 1 | -6.992611 | 0.565268  | 4.544330  |
| 1 | 6.992613  | 0.565276  | -4.544324 |
| 1 | 7.513124  | 1.653931  | 3.728919  |
| 1 | 7.151729  | -1.561448 | -4.581593 |
| 1 | 7.435494  | -3.490046 | -3.096873 |
| 1 | 7.637410  | 3.505508  | 2.683358  |
| 1 | 7.786902  | 4.405698  | 0.408682  |
| 1 | 7.701025  | -4.424360 | -1.175317 |
| 1 | 8.037284  | -4.090159 | 1.230578  |
| 1 | 7.908206  | 4.193317  | -1.717395 |
| 1 | 8.054595  | 2.706544  | -3.684596 |
| 1 | 8.299982  | -2.905456 | 2.989615  |
| 1 | 8.553774  | -0.651328 | 3.969235  |

Nanotube (7,5) u06v01  
B3LYP/STO-3G Energy: -5510.496510

|   |           |           |           |
|---|-----------|-----------|-----------|
| 6 | -7.503518 | -0.012429 | -4.156523 |
| 6 | -7.376936 | -1.369288 | -3.942364 |
| 6 | -7.301600 | 2.069433  | 3.689329  |
| 6 | -7.177124 | 3.152830  | 2.841704  |
| 6 | -7.077087 | -3.704372 | -2.060874 |
| 6 | -6.938581 | -4.237610 | -0.787821 |
| 6 | -6.876174 | 4.296953  | 0.068387  |
| 6 | -6.740199 | 4.133280  | -1.305723 |
| 6 | -6.642168 | -3.800725 | 2.182026  |
| 6 | -6.512696 | -2.957859 | 3.283611  |
| 6 | -6.462367 | 2.208593  | -3.585525 |
| 6 | -6.344856 | 0.861969  | -4.048084 |
| 6 | -6.253377 | -0.141916 | 4.289213  |
| 6 | -6.141906 | 1.260659  | 4.026996  |
| 6 | -6.086283 | -1.968236 | -3.643112 |
| 6 | -5.946322 | -3.129294 | -2.752569 |
| 6 | -5.888553 | 3.536647  | 2.293768  |
| 6 | -5.748856 | 4.120893  | 0.948440  |
| 6 | -5.657101 | -4.262209 | -0.125462 |
| 6 | -5.515405 | -4.085700 | 1.335223  |
| 6 | -5.467994 | 3.811567  | -1.895073 |
| 6 | -5.339922 | 2.899457  | -3.065898 |
| 6 | -5.247743 | -2.372096 | 3.628004  |
| 6 | -5.128438 | -0.993395 | 4.184310  |
| 6 | -5.041997 | 0.247868  | -4.100388 |
| 6 | -4.915431 | -1.186807 | -3.923200 |
| 6 | -4.841327 | 1.826178  | 3.773067  |

|   |           |           |           |
|---|-----------|-----------|-----------|
| 6 | -4.717505 | 2.990660  | 2.917282  |
| 6 | -4.638810 | -3.473394 | -2.261669 |
| 6 | -4.495206 | -4.066919 | -0.945786 |
| 6 | -4.442143 | 4.170659  | 0.347421  |
| 6 | -4.301974 | 4.037732  | -1.089199 |
| 6 | -4.211516 | -3.803794 | 1.871544  |
| 6 | -4.076253 | -2.963268 | 3.043304  |
| 6 | -4.016075 | 2.391912  | -3.390602 |
| 6 | -3.871398 | 1.082195  | -3.965847 |
| 6 | -3.805963 | -0.385277 | 4.216908  |
| 6 | -3.667331 | 1.038511  | 4.070629  |
| 6 | -3.591730 | -1.749196 | -3.710004 |
| 6 | -3.452845 | -2.927566 | -2.906442 |
| 6 | -3.393097 | 3.380536  | 2.457427  |
| 6 | -3.255007 | 4.012139  | 1.176505  |
| 6 | -3.165752 | -4.165142 | -0.356524 |
| 6 | -3.023909 | -4.071725 | 1.069610  |
| 6 | -2.969948 | 3.832043  | -1.652516 |
| 6 | -2.831350 | 3.037329  | -2.848211 |
| 6 | -2.747523 | -2.495002 | 3.427684  |
| 6 | -2.617547 | -1.207837 | 4.070898  |
| 6 | -2.550725 | 0.485777  | -4.088058 |
| 6 | -2.416690 | -0.954906 | -4.003489 |
| 6 | -2.350086 | 1.624339  | 3.889539  |
| 6 | -2.219597 | 2.838757  | 3.104192  |
| 6 | -2.137215 | -3.343486 | -2.471976 |
| 6 | -1.996099 | -4.011574 | -1.187553 |
| 6 | -1.942954 | 4.159599  | 0.592860  |
| 6 | -1.804563 | 4.104313  | -0.857450 |
| 6 | -1.714440 | -3.893969 | 1.645327  |
| 6 | -1.580034 | -3.118088 | 2.873010  |
| 6 | -1.523089 | 2.588577  | -3.253681 |
| 6 | -1.384160 | 1.305639  | -3.924839 |
| 6 | -1.313802 | -0.610094 | 4.202353  |
| 6 | -1.181582 | 0.836611  | 4.153590  |
| 6 | -1.109653 | -1.535615 | -3.834406 |
| 6 | -0.971427 | -2.769838 | -3.087620 |
| 6 | -0.913306 | 3.262549  | 2.669784  |
| 6 | -0.776819 | 3.963128  | 1.411034  |
| 6 | -0.687305 | -4.148031 | -0.602670 |
| 6 | -0.546735 | -4.122985 | 0.835575  |
| 6 | -0.491323 | 3.926582  | -1.431945 |
| 6 | -0.350166 | 3.192608  | -2.664202 |
| 6 | -0.267408 | -2.667351 | 3.279896  |
| 6 | -0.134448 | -1.419902 | 3.989067  |
| 6 | -0.068212 | 0.713447  | -4.061090 |
| 6 | 0.068211  | -0.720333 | -4.059886 |
| 6 | 0.134442  | 1.426667  | 3.986670  |
| 6 | 0.267405  | 2.672917  | 3.275394  |
| 6 | 0.350167  | -3.197130 | -2.658811 |
| 6 | 0.491327  | -3.929010 | -1.425309 |
| 6 | 0.546738  | 4.124397  | 0.828606  |
| 6 | 0.687309  | 4.147000  | -0.609679 |
| 6 | 0.776821  | -3.960721 | 1.417728  |
| 6 | 0.913306  | -3.258007 | 2.675287  |
| 6 | 0.971428  | 2.764590  | -3.092288 |
| 6 | 1.109652  | 1.529108  | -3.836990 |
| 6 | 1.181576  | -0.829565 | 4.154996  |
| 6 | 1.313795  | 0.617220  | 4.201326  |
| 6 | 1.384159  | -1.312295 | -3.922639 |
| 6 | 1.523088  | -2.594098 | -3.249315 |
| 6 | 1.580032  | 3.122963  | 2.867747  |
| 6 | 1.714441  | 3.896758  | 1.638747  |
| 6 | 1.804567  | -4.105760 | -0.850513 |
| 6 | 1.942958  | -4.158579 | 0.599889  |
| 6 | 1.996103  | 4.009543  | -1.194328 |
| 6 | 2.137218  | 3.339278  | -2.477616 |
| 6 | 2.219596  | -2.833478 | 3.108979  |
| 6 | 2.350081  | -1.617737 | 3.892277  |
| 6 | 2.416689  | 0.948114  | -4.005096 |

|   |           |           |           |
|---|-----------|-----------|-----------|
| 6 | 2.550723  | -0.492709 | -4.087240 |
| 6 | 2.617541  | 1.214740  | 4.068867  |
| 6 | 2.747519  | 2.500817  | 3.423480  |
| 6 | 2.831350  | -3.042162 | -2.843086 |
| 6 | 2.969950  | -3.834842 | -1.646042 |
| 6 | 3.023912  | 4.073530  | 1.062730  |
| 6 | 3.165756  | 4.164518  | -0.363560 |
| 6 | 3.255011  | -4.010120 | 1.183282  |
| 6 | 3.393097  | -3.376346 | 2.463132  |
| 6 | 3.452847  | 2.922621  | -2.911377 |
| 6 | 3.591730  | 1.742897  | -3.712950 |
| 6 | 3.667326  | -1.031605 | 4.072385  |
| 6 | 3.805957  | 0.392428  | 4.216266  |
| 6 | 3.871396  | -1.088920 | -3.964028 |
| 6 | 4.016075  | -2.397665 | -3.386573 |
| 6 | 4.076251  | 2.968430  | 3.038309  |
| 6 | 4.211518  | 3.806962  | 1.865122  |
| 6 | 4.301977  | -4.039568 | -1.082376 |
| 6 | 4.442147  | -4.170045 | 0.354468  |
| 6 | 4.495210  | 4.065290  | -0.952652 |
| 6 | 4.638813  | 3.469535  | -2.267528 |
| 6 | 4.717505  | -2.985691 | 2.922328  |
| 6 | 4.841324  | -1.819770 | 3.776151  |
| 6 | 4.915430  | 1.180149  | -3.925202 |
| 6 | 5.041996  | -0.254822 | -4.099976 |
| 6 | 5.128431  | 1.000490  | 4.182652  |
| 6 | 5.247738  | 2.378249  | 3.624015  |
| 6 | 5.339922  | -2.904660 | -3.061014 |
| 6 | 5.467996  | -3.814775 | -1.888636 |
| 6 | 5.515408  | 4.087950  | 1.328323  |
| 6 | 5.657106  | 4.261968  | -0.132660 |
| 6 | 5.748860  | -4.119254 | 0.955400  |
| 6 | 5.888554  | -3.532727 | 2.299737  |
| 6 | 5.946326  | 3.124603  | -2.757845 |
| 6 | 6.086284  | 1.962047  | -3.646431 |
| 6 | 6.141902  | -1.253824 | 4.029134  |
| 6 | 6.253371  | 0.149189  | 4.288994  |
| 6 | 6.344853  | -0.868835 | -4.046646 |
| 6 | 6.462365  | -2.214678 | -3.581817 |
| 6 | 6.512693  | 2.963424  | 3.278631  |
| 6 | 6.642169  | 3.804414  | 2.175614  |
| 6 | 6.740203  | -4.135476 | -1.298738 |
| 6 | 6.876179  | -4.296804 | 0.075649  |
| 6 | 6.938586  | 4.236237  | -0.794973 |
| 6 | 7.077092  | 3.700844  | -2.067121 |
| 6 | 7.177124  | -3.147983 | 2.847023  |
| 6 | 7.301598  | -2.063162 | 3.692826  |
| 6 | 7.376936  | 1.362596  | -3.944681 |
| 6 | 7.503515  | 0.005379  | -4.156561 |
| 1 | -8.498616 | 0.439168  | -4.271739 |
| 1 | -8.278879 | -1.992874 | -3.892857 |
| 1 | -8.296887 | 1.725652  | 4.003415  |
| 1 | -8.081321 | 3.666164  | 2.489931  |
| 1 | -8.083353 | -3.589513 | -2.483497 |
| 1 | -7.838563 | -4.530870 | -0.232072 |
| 1 | -7.881845 | 4.411883  | 0.492491  |
| 1 | -7.643364 | 4.120896  | -1.929520 |
| 1 | -7.646274 | -4.119613 | 1.874287  |
| 1 | -7.419718 | -2.635430 | 3.811217  |
| 1 | -7.473073 | 2.598033  | -3.408059 |
| 1 | -7.262607 | -0.572129 | 4.323494  |
| 1 | 7.262598  | 0.579462  | 4.322559  |
| 1 | 7.473072  | -2.603820 | -3.403703 |
| 1 | 7.419713  | 2.641893  | 3.806788  |
| 1 | 7.646277  | 4.122774  | 1.867334  |
| 1 | 7.643367  | -4.124149 | -1.922556 |
| 1 | 7.881850  | -4.411005 | 0.499947  |
| 1 | 7.838570  | 4.530429  | -0.239718 |
| 1 | 8.083358  | 3.585261  | -2.489546 |
| 1 | 8.081322  | -3.661903 | 2.496112  |

|   |          |           |           |
|---|----------|-----------|-----------|
| 1 | 8.296884 | -1.718849 | 4.006332  |
| 1 | 8.278879 | 1.986264  | -3.896229 |
| 1 | 8.498613 | -0.446413 | -4.271027 |

Nanotube (7,5) u06v02  
B3LYP/STO-3G Energy: -5585.795178

|   |           |           |           |
|---|-----------|-----------|-----------|
| 6 | -7.741371 | -3.806896 | -1.071305 |
| 6 | -7.621791 | -3.952647 | 0.294547  |
| 6 | -7.257577 | 4.301522  | -1.062530 |
| 6 | -7.150450 | 3.757027  | -2.326341 |
| 6 | -7.286916 | -2.744202 | 3.034912  |
| 6 | -7.113673 | -1.657296 | 3.878334  |
| 6 | -6.932218 | 1.361039  | -4.144311 |
| 6 | -6.843949 | -0.011569 | -4.340346 |
| 6 | -6.716308 | 1.313197  | 4.221810  |
| 6 | -6.540633 | 2.588639  | 3.691723  |
| 6 | -6.659984 | -2.718561 | -3.068330 |
| 6 | -6.570590 | -3.514501 | -1.886802 |
| 6 | -6.214114 | 4.274173  | 1.230580  |
| 6 | -6.095496 | 4.376452  | -0.190585 |
| 6 | -6.327765 | -3.859047 | 0.952828  |
| 6 | -6.172077 | -3.302397 | 2.303337  |
| 6 | -5.876443 | 3.278602  | -2.835647 |
| 6 | -5.776572 | 2.126737  | -3.746111 |
| 6 | -5.811301 | -1.067617 | 4.076744  |
| 6 | -5.620445 | 0.382827  | 4.283787  |
| 6 | -5.593890 | -0.708308 | -4.181226 |
| 6 | -5.513457 | -2.077088 | -3.601643 |
| 6 | -5.256937 | 3.028141  | 3.218935  |
| 6 | -5.102327 | 3.914288  | 2.030030  |
| 6 | -5.275836 | -3.766849 | -1.304626 |
| 6 | -5.158443 | -3.968149 | 0.127925  |
| 6 | -4.797683 | 4.229516  | -0.799728 |
| 6 | -4.690585 | 3.698628  | -2.145627 |
| 6 | -4.853336 | -2.961602 | 2.765961  |
| 6 | -4.674396 | -1.849211 | 3.680108  |
| 6 | -4.490400 | 1.514137  | -3.950466 |
| 6 | -4.400001 | 0.087357  | -4.193290 |
| 6 | -4.296861 | 0.928583  | 4.155826  |
| 6 | -4.113162 | 2.271649  | 3.645112  |
| 6 | -4.206654 | -2.566877 | -3.193413 |
| 6 | -4.093761 | -3.462448 | -2.074270 |
| 6 | -3.773480 | 4.053521  | 1.453565  |
| 6 | -3.623745 | 4.270789  | 0.040269  |
| 6 | -3.834727 | -3.949926 | 0.728677  |
| 6 | -3.682874 | -3.482424 | 2.074441  |
| 6 | -3.379311 | 3.306999  | -2.638554 |
| 6 | -3.278217 | 2.230972  | -3.580444 |
| 6 | -3.327996 | -1.351074 | 3.931453  |
| 6 | -3.139128 | 0.044120  | 4.211676  |
| 6 | -3.089724 | -0.556094 | -4.138036 |
| 6 | -2.998310 | -1.917534 | -3.676750 |
| 6 | -2.766738 | 2.716176  | 3.294466  |
| 6 | -2.599547 | 3.658729  | 2.214930  |
| 6 | -2.782927 | -3.776614 | -1.526271 |
| 6 | -2.660967 | -4.067687 | -0.112505 |
| 6 | -2.305942 | 4.195820  | -0.569736 |
| 6 | -2.189015 | 3.747591  | -1.943676 |
| 6 | -2.357937 | -3.214466 | 2.591509  |
| 6 | -2.183387 | -2.153655 | 3.570741  |
| 6 | -1.983467 | 1.659353  | -3.874021 |
| 6 | -1.894424 | 0.242129  | -4.196751 |
| 6 | -1.809190 | 0.600874  | 4.195221  |
| 6 | -1.624819 | 1.981402  | 3.762183  |
| 6 | -1.707140 | -2.469894 | -3.346186 |
| 6 | -1.603442 | -3.449801 | -2.275806 |
| 6 | -1.284101 | 3.891116  | 1.674266  |

|   |           |           |           |
|---|-----------|-----------|-----------|
| 6 | -1.137155 | 4.206681  | 0.262451  |
| 6 | -1.355077 | -4.097303 | 0.494776  |
| 6 | -1.206266 | -3.699172 | 1.880622  |
| 6 | -0.893703 | 3.392576  | -2.464782 |
| 6 | -0.792463 | 2.356720  | -3.471763 |
| 6 | -0.858634 | -1.669733 | 3.859505  |
| 6 | -0.671756 | -0.280051 | 4.211030  |
| 6 | -0.603556 | -0.404379 | -4.174878 |
| 6 | -0.511216 | -1.788123 | -3.779724 |
| 6 | -0.295761 | 2.444701  | 3.436612  |
| 6 | -0.123587 | 3.438868  | 2.407990  |
| 6 | -0.299059 | -3.776047 | -1.735449 |
| 6 | -0.177135 | -4.144746 | -0.348571 |
| 6 | 0.177134  | 4.144848  | -0.347368 |
| 6 | 0.299059  | 3.776554  | -1.734354 |
| 6 | 0.123586  | -3.439569 | 2.406993  |
| 6 | 0.295761  | -2.445702 | 3.435904  |
| 6 | 0.511217  | 1.789224  | -3.779206 |
| 6 | 0.603557  | 0.405595  | -4.174761 |
| 6 | 0.671755  | 0.278826  | 4.211110  |
| 6 | 0.858633  | 1.668609  | 3.859987  |
| 6 | 0.792464  | -2.355708 | -3.472446 |
| 6 | 0.893704  | -3.391857 | -2.465765 |
| 6 | 1.206265  | 3.698624  | 1.881695  |
| 6 | 1.355077  | 4.097159  | 0.495965  |
| 6 | 1.137154  | -4.206757 | 0.261230  |
| 6 | 1.284100  | -3.891604 | 1.673138  |
| 6 | 1.603442  | 3.450465  | -2.274806 |
| 6 | 1.707140  | 2.470869  | -3.345470 |
| 6 | 1.624818  | -1.982497 | 3.761609  |
| 6 | 1.809190  | -0.602095 | 4.195046  |
| 6 | 1.894425  | -0.240907 | -4.196820 |
| 6 | 1.983468  | -1.658224 | -3.874501 |
| 6 | 2.183386  | 2.152615  | 3.571363  |
| 6 | 2.357936  | 3.213710  | 2.592440  |
| 6 | 2.189015  | -3.747024 | -1.944763 |
| 6 | 2.305942  | -4.195655 | -0.570953 |
| 6 | 2.660967  | 4.067721  | -0.111324 |
| 6 | 2.782927  | 3.777060  | -1.525175 |
| 6 | 2.599546  | -3.659376 | 2.213869  |
| 6 | 2.766737  | -2.717136 | 3.293678  |
| 6 | 2.998311  | 1.918605  | -3.676194 |
| 6 | 3.089725  | 0.557299  | -4.137875 |
| 6 | 3.139128  | -0.045346 | 4.211662  |
| 6 | 3.327995  | 1.349929  | 3.931843  |
| 6 | 3.278218  | -2.229929 | -3.581089 |
| 6 | 3.379311  | -3.306229 | -2.639512 |
| 6 | 3.682874  | 3.481818  | 2.075450  |
| 6 | 3.834727  | 3.949714  | 0.729823  |
| 6 | 3.623744  | -4.270802 | 0.039030  |
| 6 | 3.773480  | -4.053946 | 1.452390  |
| 6 | 4.093762  | 3.463053  | -2.073265 |
| 6 | 4.206654  | 2.567808  | -3.192669 |
| 6 | 4.113162  | -2.272710 | 3.644453  |
| 6 | 4.296860  | -0.929792 | 4.155554  |
| 6 | 4.400002  | -0.086136 | -4.193314 |
| 6 | 4.490402  | -1.512987 | -3.950903 |
| 6 | 4.674395  | 1.848139  | 3.680642  |
| 6 | 4.853335  | 2.960795  | 2.766818  |
| 6 | 4.690585  | -3.698003 | -2.146698 |
| 6 | 4.797683  | -4.229284 | -0.800955 |
| 6 | 5.158443  | 3.968113  | 0.129077  |
| 6 | 5.275837  | 3.767230  | -1.303532 |
| 6 | 5.102327  | -3.914881 | 2.028895  |
| 6 | 5.256937  | -3.029078 | 3.218057  |
| 6 | 5.513458  | 2.078138  | -3.601041 |
| 6 | 5.593892  | 0.709525  | -4.181019 |
| 6 | 5.620445  | -0.384074 | 4.283674  |
| 6 | 5.811300  | 1.066429  | 4.077052  |
| 6 | 5.776574  | -2.125645 | -3.746724 |

|   |           |           |           |
|---|-----------|-----------|-----------|
| 6 | 5.876444  | -3.277776 | -2.836596 |
| 6 | 6.172077  | 3.301724  | 2.304295  |
| 6 | 6.327765  | 3.858769  | 0.953949  |
| 6 | 6.095495  | -4.376399 | -0.191854 |
| 6 | 6.214113  | -4.274533 | 1.229341  |
| 6 | 6.570591  | 3.515050  | -1.885781 |
| 6 | 6.659985  | 2.719457  | -3.067543 |
| 6 | 6.540632  | -2.589713 | 3.690971  |
| 6 | 6.716307  | -1.314425 | 4.221428  |
| 6 | 6.843951  | 0.012834  | -4.340339 |
| 6 | 6.932220  | -1.359831 | -4.144700 |
| 6 | 7.113672  | 1.656165  | 3.878812  |
| 6 | 7.286915  | 2.743317  | 3.035707  |
| 6 | 7.150450  | -3.756351 | -2.327429 |
| 6 | 7.257576  | -4.301216 | -1.063778 |
| 6 | 7.621791  | 3.952562  | 0.295695  |
| 6 | 7.741371  | 3.807210  | -1.070199 |
| 1 | -8.734795 | -3.770965 | -1.539570 |
| 1 | -8.527629 | -4.037303 | 0.908640  |
| 1 | -8.244796 | 4.555137  | -0.651904 |
| 1 | -8.059866 | 3.584155  | -2.916214 |
| 1 | -8.304755 | -3.089451 | 2.812936  |
| 1 | -7.998321 | -1.165910 | 4.303547  |
| 1 | -7.921559 | 1.836049  | -4.147626 |
| 1 | -7.767015 | -0.586127 | -4.491404 |
| 1 | -7.733538 | 0.968491  | 4.447545  |
| 1 | -7.425548 | 3.213200  | 3.513294  |
| 1 | -7.660350 | -2.413319 | -3.401246 |
| 1 | -7.226208 | 4.234615  | 1.653526  |
| 1 | 7.226207  | -4.235096 | 1.652298  |
| 1 | 7.660346  | 2.414317  | -3.400549 |
| 1 | 7.425548  | -3.214224 | 3.512362  |
| 1 | 7.733537  | -0.969785 | 4.447264  |
| 1 | 7.767017  | 0.587436  | -4.491230 |
| 1 | 7.921561  | -1.834840 | -4.148149 |
| 1 | 7.998321  | 1.164655  | 4.303883  |
| 1 | 8.304755  | 3.088632  | 2.813832  |
| 1 | 8.059867  | -3.583306 | -2.917251 |
| 1 | 8.244794  | -4.554953 | -0.653228 |
| 1 | 8.527629  | 4.037042  | 0.909814  |
| 1 | 8.734797  | 3.771421  | -1.538474 |

Nanotube (7,5) u06v03  
B3LYP/STO-3G Energy: -5661.093292

|   |          |           |           |
|---|----------|-----------|-----------|
| 6 | 7.750107 | -3.609790 | 1.947386  |
| 6 | 7.600180 | -4.096644 | 0.666964  |
| 6 | 7.502623 | 4.236104  | -0.133160 |
| 6 | 7.401151 | 4.038090  | 1.228360  |
| 6 | 7.250322 | -3.622781 | -2.288140 |
| 6 | 7.095053 | -2.783896 | -3.379900 |
| 6 | 7.146225 | 2.196479  | 3.602239  |
| 6 | 7.022661 | 0.924130  | 4.144892  |
| 6 | 6.782915 | 0.012360  | -4.468465 |
| 6 | 6.655135 | 1.385088  | -4.281850 |
| 6 | 6.738587 | -2.010713 | 3.609340  |
| 6 | 6.603631 | -3.078520 | 2.673531  |
| 6 | 6.420312 | 3.654401  | -2.332454 |
| 6 | 6.328242 | 4.120722  | -0.985353 |
| 6 | 6.296322 | -4.130699 | 0.020093  |
| 6 | 6.132003 | -3.934473 | -1.424685 |
| 6 | 6.122052 | 3.746047  | 1.854903  |
| 6 | 6.005371 | 2.870861  | 3.031099  |
| 6 | 5.806952 | -2.218937 | -3.709456 |
| 6 | 5.657226 | -0.866031 | -4.280098 |
| 6 | 5.750008 | 0.250092  | 4.182494  |
| 6 | 5.620163 | -1.217598 | 3.974714  |
| 6 | 5.392150 | 1.974514  | -3.927146 |

|   |           |           |           |
|---|-----------|-----------|-----------|
| 6 | 5.284114  | 3.139048  | -3.004182 |
| 6 | 5.290843  | -3.429911 | 2.190436  |
| 6 | 5.139924  | -3.986722 | 0.858371  |
| 6 | 5.036654  | 4.177286  | -0.347268 |
| 6 | 4.937187  | 4.012722  | 1.091020  |
| 6 | 4.815637  | -3.679035 | -1.945917 |
| 6 | 4.654084  | -2.833395 | -3.114348 |
| 6 | 4.706141  | 2.373009  | 3.399002  |
| 6 | 4.579874  | 1.060141  | 4.002322  |
| 6 | 4.353379  | -0.261294 | -4.287169 |
| 6 | 4.219471  | 1.173820  | -4.137331 |
| 6 | 4.293385  | -1.753803 | 3.721449  |
| 6 | 4.133593  | -2.901165 | 2.869876  |
| 6 | 3.970530  | 3.465437  | -2.471277 |
| 6 | 3.850983  | 4.040278  | -1.158925 |
| 6 | 3.806695  | -4.076583 | 0.287021  |
| 6 | 3.643647  | -3.962664 | -1.131150 |
| 6 | 3.624011  | 3.801540  | 1.679614  |
| 6 | 3.508645  | 3.007931  | 2.867450  |
| 6 | 3.319900  | -2.369795 | -3.471551 |
| 6 | 3.168929  | -1.090203 | -4.101382 |
| 6 | 3.251168  | 0.466398  | 4.127922  |
| 6 | 3.112727  | -0.963276 | 4.035265  |
| 6 | 2.893329  | 1.738317  | -3.900248 |
| 6 | 2.772489  | 2.928089  | -3.096579 |
| 6 | 2.803392  | -3.301457 | 2.434571  |
| 6 | 2.645186  | -3.935859 | 1.143943  |
| 6 | 2.541148  | 4.164983  | -0.537938 |
| 6 | 2.434568  | 4.086173  | 0.905189  |
| 6 | 2.316561  | -3.788071 | -1.685377 |
| 6 | 2.156609  | -3.011482 | -2.901957 |
| 6 | 2.202777  | 2.572486  | 3.310689  |
| 6 | 2.079510  | 1.291110  | 3.990654  |
| 6 | 1.855356  | -0.502800 | -4.218572 |
| 6 | 1.720604  | 0.946651  | -4.155868 |
| 6 | 1.800321  | -1.540972 | 3.874570  |
| 6 | 1.647940  | -2.758689 | 3.092377  |
| 6 | 1.472524  | 3.335025  | -2.622346 |
| 6 | 1.359250  | 4.002639  | -1.335068 |
| 6 | 1.326831  | -4.074350 | 0.579026  |
| 6 | 1.163808  | -4.035100 | -0.861671 |
| 6 | 1.138527  | 3.917854  | 1.511813  |
| 6 | 1.025301  | 3.179431  | 2.752953  |
| 6 | 0.842391  | -2.574195 | -3.294609 |
| 6 | 0.691636  | -1.318177 | -3.996570 |
| 6 | 0.771512  | 0.702735  | 4.151366  |
| 6 | 0.633201  | -0.732696 | 4.130758  |
| 6 | 0.412605  | 1.523285  | -3.951271 |
| 6 | 0.288369  | 2.751950  | -3.207731 |
| 6 | 0.326086  | -3.169743 | 2.669065  |
| 6 | 0.165755  | -3.868698 | 1.420713  |
| 6 | 0.054602  | 4.139282  | -0.717617 |
| 6 | -0.054607 | 4.139152  | 0.718354  |
| 6 | -0.165757 | -3.868442 | -1.421399 |
| 6 | -0.326086 | -3.169263 | -2.669626 |
| 6 | -0.288369 | 2.751374  | 3.208220  |
| 6 | -0.412602 | 1.522578  | 3.951542  |
| 6 | -0.633197 | -0.731957 | -4.130888 |
| 6 | -0.771508 | 0.703477  | -4.151243 |
| 6 | -0.691633 | -1.318893 | 3.996341  |
| 6 | -0.842390 | -2.574785 | 3.294156  |
| 6 | -1.025302 | 3.179923  | -2.752390 |
| 6 | -1.138531 | 3.918122  | -1.511117 |
| 6 | -1.163811 | -4.035251 | 0.860955  |
| 6 | -1.326834 | -4.074242 | -0.579749 |
| 6 | -1.359254 | 4.002394  | 1.335780  |
| 6 | -1.472526 | 3.334550  | 2.622939  |
| 6 | -1.647940 | -2.758132 | -3.092866 |
| 6 | -1.800318 | -1.540278 | -3.874846 |
| 6 | -1.720601 | 0.945907  | 4.156042  |

|   |           |           |           |
|---|-----------|-----------|-----------|
| 6 | -1.855352 | -0.503556 | 4.218490  |
| 6 | -2.079506 | 1.291824  | -3.990431 |
| 6 | -2.202776 | 2.573078  | -3.310237 |
| 6 | -2.156609 | -3.012001 | 2.901427  |
| 6 | -2.316563 | -3.788369 | 1.684706  |
| 6 | -2.434572 | 4.086328  | -0.904462 |
| 6 | -2.541153 | 4.164876  | 0.538678  |
| 6 | -2.645189 | -3.935646 | -1.144641 |
| 6 | -2.803393 | -3.301014 | -2.435158 |
| 6 | -2.772490 | 2.927529  | 3.097101  |
| 6 | -2.893327 | 1.737616  | 3.900563  |
| 6 | -3.112723 | -0.962554 | -4.035445 |
| 6 | -3.251163 | 0.467136  | -4.127851 |
| 6 | -3.168925 | -1.090939 | 4.101201  |
| 6 | -3.319898 | -2.370417 | 3.471139  |
| 6 | -3.508645 | 3.008442  | -2.866922 |
| 6 | -3.624014 | 3.801833  | -1.678940 |
| 6 | -3.643649 | -3.962857 | 1.130447  |
| 6 | -3.806698 | -4.076519 | -0.287745 |
| 6 | -3.850988 | 4.040055  | 1.159642  |
| 6 | -3.970533 | 3.464983  | 2.471893  |
| 6 | -4.133593 | -2.900644 | -2.870393 |
| 6 | -4.293382 | -1.753135 | -3.721769 |
| 6 | -4.219467 | 1.173076  | 4.137551  |
| 6 | -4.353374 | -0.262064 | 4.287138  |
| 6 | -4.579870 | 1.060858  | -4.002151 |
| 6 | -4.706139 | 2.373617  | -3.398595 |
| 6 | -4.654083 | -2.833951 | 3.113854  |
| 6 | -4.815639 | -3.679375 | 1.945267  |
| 6 | -4.937191 | 4.012903  | -1.090309 |
| 6 | -5.036659 | 4.177203  | 0.348008  |
| 6 | -5.139927 | -3.986552 | -0.859078 |
| 6 | -5.290845 | -3.429507 | -2.191046 |
| 6 | -5.284116 | 3.138497  | 3.004743  |
| 6 | -5.392148 | 1.973806  | 3.927507  |
| 6 | -5.620160 | -1.216885 | -3.974945 |
| 6 | -5.750003 | 0.250842  | -4.182474 |
| 6 | -5.657222 | -0.866800 | 4.279966  |
| 6 | -5.806949 | -2.219602 | 3.709078  |
| 6 | -6.005369 | 2.871401  | -3.030604 |
| 6 | -6.122055 | 3.746366  | -1.854244 |
| 6 | -6.132005 | -3.934714 | 1.423988  |
| 6 | -6.296326 | -4.130675 | -0.020826 |
| 6 | -6.328247 | 4.120519  | 0.986082  |
| 6 | -6.420316 | 3.653961  | 2.333102  |
| 6 | -6.603631 | -3.078028 | -2.674080 |
| 6 | -6.738585 | -2.010060 | -3.609707 |
| 6 | -6.655132 | 1.384318  | 4.282117  |
| 6 | -6.782909 | 0.011558  | 4.468494  |
| 6 | -7.022656 | 0.924877  | -4.144764 |
| 6 | -7.146222 | 2.197127  | -3.601877 |
| 6 | -7.095050 | -2.784500 | 3.379421  |
| 6 | -7.250323 | -3.623179 | 2.287503  |
| 6 | -7.401155 | 4.038286  | -1.227647 |
| 6 | -7.502628 | 4.236048  | 0.133910  |
| 6 | -7.600183 | -4.096497 | -0.667690 |
| 6 | -7.750110 | -3.609418 | -1.948027 |
| 1 | 8.752686  | -3.489498 | 2.380801  |
| 1 | 8.490792  | -4.367961 | 0.085592  |
| 1 | 8.489365  | 4.345864  | -0.604110 |
| 1 | 8.314611  | 3.995374  | 1.835486  |
| 1 | 8.260464  | -3.937238 | -1.996365 |
| 1 | 7.985599  | -2.450811 | -3.928398 |
| 1 | 8.148268  | 2.625594  | 3.474870  |
| 1 | 7.931218  | 0.378456  | 4.430842  |
| 1 | 7.784842  | -0.413298 | -4.608314 |
| 1 | 7.560938  | 2.005198  | -4.278372 |
| 1 | 7.753189  | -1.662934 | 3.842154  |
| 1 | 7.423291  | 3.475349  | -2.740656 |
| 1 | -7.423294 | 3.474833  | 2.741272  |



|   |           |           |           |
|---|-----------|-----------|-----------|
| 1 | -7.753187 | -1.662236 | -3.842456 |
| 1 | -7.560934 | 2.004429  | 4.278752  |
| 1 | -7.784835 | -0.414125 | 4.608275  |
| 1 | -7.931211 | 0.379259  | -4.430825 |
| 1 | -8.148264 | 2.626220  | -3.474437 |
| 1 | -7.985595 | -2.451518 | 3.927983  |
| 1 | -8.260468 | -3.937578 | 1.995668  |
| 1 | -8.314614 | 3.995677  | -1.834781 |
| 1 | -8.489372 | 4.345716  | 0.604879  |
| 1 | -8.490797 | -4.367910 | -0.086365 |
| 1 | -8.752688 | -3.489041 | -2.381418 |

Nanotube (7,5) u06v04  
B3LYP/STO-3G Energy: -5736.390888

|   |          |           |           |
|---|----------|-----------|-----------|
| 6 | 7.884570 | 2.820207  | -2.919416 |
| 6 | 7.775234 | 3.622146  | -1.804911 |
| 6 | 7.517643 | -4.220433 | 1.105985  |
| 6 | 7.385955 | -4.374553 | -0.257906 |
| 6 | 7.483953 | 3.930723  | 1.178460  |
| 6 | 7.336418 | 3.404080  | 2.450680  |
| 6 | 7.111742 | -3.196744 | -3.019603 |
| 6 | 7.003258 | -2.103936 | -3.868026 |
| 6 | 6.992069 | 0.989485  | 4.225624  |
| 6 | 6.831794 | -0.380755 | 4.400709  |
| 6 | 6.798517 | 0.877081  | -4.097083 |
| 6 | 6.709476 | 2.151132  | -3.465450 |
| 6 | 6.502982 | -3.066364 | 3.102439  |
| 6 | 6.367349 | -3.858556 | 1.922780  |
| 6 | 6.487082 | 3.855536  | -1.165665 |
| 6 | 6.352127 | 4.039451  | 0.282302  |
| 6 | 6.097213 | -4.216706 | -0.914403 |
| 6 | 5.970035 | -3.669435 | -2.271922 |
| 6 | 6.043993 | 2.975420  | 2.935961  |
| 6 | 5.879925 | 1.819278  | 3.837226  |
| 6 | 5.744484 | -1.425832 | -4.053664 |
| 6 | 5.652916 | 0.047743  | -4.228287 |
| 6 | 5.548092 | -1.008556 | 4.232527  |
| 6 | 5.393791 | -2.367233 | 3.642281  |
| 6 | 5.415924 | 2.651873  | -3.067683 |
| 6 | 5.308446 | 3.534727  | -1.920323 |
| 6 | 5.058890 | -4.042965 | 1.345287  |
| 6 | 4.926354 | -4.248030 | -0.085371 |
| 6 | 5.042803 | 3.961289  | 0.874238  |
| 6 | 4.890771 | 3.446998  | 2.223288  |
| 6 | 4.673223 | -3.246712 | -2.731317 |
| 6 | 4.561478 | -2.129548 | -3.650242 |
| 6 | 4.564508 | 1.271012  | 4.023363  |
| 6 | 4.397786 | -0.150557 | 4.251283  |
| 6 | 4.345676 | 0.668178  | -4.100287 |
| 6 | 4.232099 | 1.999933  | -3.569702 |
| 6 | 4.061812 | -2.785691 | 3.236671  |
| 6 | 3.897685 | -3.672817 | 2.117421  |
| 6 | 3.991703 | 3.803394  | -1.368271 |
| 6 | 3.859114 | 4.057981  | 0.034381  |
| 6 | 3.604109 | -4.156603 | -0.683344 |
| 6 | 3.476228 | -3.688837 | -2.031197 |
| 6 | 3.555995 | 3.124191  | 2.709710  |
| 6 | 3.393397 | 2.054182  | 3.649947  |
| 6 | 3.244228 | -1.550138 | -3.899185 |
| 6 | 3.140208 | -0.143586 | -4.177538 |
| 6 | 3.055005 | -0.722409 | 4.191772  |
| 6 | 2.890260 | -2.074723 | 3.725720  |
| 6 | 2.921510 | 2.535094  | -3.228720 |
| 6 | 2.807343 | 3.480132  | -2.141641 |
| 6 | 2.569750 | -3.916771 | 1.573518  |
| 6 | 2.427772 | -4.202089 | 0.161500  |
| 6 | 2.540705 | 4.064432  | 0.637500  |

|   |           |           |           |
|---|-----------|-----------|-----------|
| 6 | 2.392756  | 3.628141  | 2.013835  |
| 6 | 2.168142  | -3.342742 | -2.545675 |
| 6 | 2.056545  | -2.278270 | -3.529874 |
| 6 | 2.070362  | 1.550984  | 3.937708  |
| 6 | 1.904552  | 0.139055  | 4.255520  |
| 6 | 1.844086  | 0.493312  | -4.150370 |
| 6 | 1.738057  | 1.874660  | -3.707512 |
| 6 | 1.570818  | -2.557329 | 3.398778  |
| 6 | 1.411409  | -3.529106 | 2.327705  |
| 6 | 1.504981  | 3.794743  | -1.608859 |
| 6 | 1.374964  | 4.125679  | -0.202021 |
| 6 | 1.120072  | -4.157701 | -0.442585 |
| 6 | 0.991703  | -3.753906 | -1.828787 |
| 6 | 1.079119  | 3.340212  | 2.528001  |
| 6 | 0.918913  | 2.310913  | 3.532602  |
| 6 | 0.759081  | -1.715123 | -3.814934 |
| 6 | 0.653543  | -0.319751 | -4.168524 |
| 6 | 0.581299  | -0.436928 | 4.232169  |
| 6 | 0.414238  | -1.812962 | 3.836064  |
| 6 | 0.436980  | 2.418065  | -3.383210 |
| 6 | 0.321880  | 3.415406  | -2.350931 |
| 6 | 0.090502  | -3.785013 | 1.791449  |
| 6 | -0.055791 | -4.140389 | 0.404315  |
| 6 | 0.055792  | 4.140404  | 0.404160  |
| 6 | -0.090501 | 3.785081  | 1.791307  |
| 6 | -0.321879 | -3.415496 | -2.350803 |
| 6 | -0.436980 | -2.418194 | -3.383119 |
| 6 | -0.414240 | 1.813107  | 3.835995  |
| 6 | -0.581302 | 0.437088  | 4.232151  |
| 6 | -0.653544 | 0.319593  | -4.168535 |
| 6 | -0.759082 | 1.714978  | -3.814998 |
| 6 | -0.918914 | -2.310779 | 3.532688  |
| 6 | -1.079119 | -3.340117 | 2.528126  |
| 6 | -0.991701 | 3.753838  | -1.828928 |
| 6 | -1.120070 | 4.157686  | -0.442742 |
| 6 | -1.374962 | -4.125689 | -0.201867 |
| 6 | -1.504980 | -3.794806 | -1.608717 |
| 6 | -1.411409 | 3.529195  | 2.327572  |
| 6 | -1.570819 | 2.557458  | 3.398680  |
| 6 | -1.738057 | -1.874801 | -3.707441 |
| 6 | -1.844087 | -0.493469 | -4.150350 |
| 6 | -1.904555 | -0.138894 | 4.255522  |
| 6 | -2.070365 | -1.550835 | 3.937764  |
| 6 | -2.056545 | 2.278137  | -3.529958 |
| 6 | -2.168141 | 3.342646  | -2.545801 |
| 6 | -2.392756 | -3.628067 | 2.013970  |
| 6 | -2.540704 | -4.064411 | 0.637652  |
| 6 | -2.427770 | 4.202099  | 0.161341  |
| 6 | -2.569749 | 3.916834  | 1.573369  |
| 6 | -2.807342 | -3.480217 | -2.141512 |
| 6 | -2.921509 | -2.535219 | -3.228625 |
| 6 | -2.890262 | 2.074865  | 3.725638  |
| 6 | -3.055008 | 0.722567  | 4.191740  |
| 6 | -3.140209 | 0.143428  | -4.177540 |
| 6 | -3.244228 | 1.549989  | -3.899240 |
| 6 | -3.393399 | -2.054044 | 3.650020  |
| 6 | -3.555995 | -3.124090 | 2.709825  |
| 6 | -3.476227 | 3.688763  | -2.031336 |
| 6 | -3.604107 | 4.156583  | -0.683501 |
| 6 | -3.859113 | -4.057986 | 0.034532  |
| 6 | -3.991701 | -3.803451 | -1.368130 |
| 6 | -3.897684 | 3.672901  | 2.117281  |
| 6 | -4.061812 | 2.785814  | 3.236562  |
| 6 | -4.232099 | -2.000070 | -3.569626 |
| 6 | -4.345678 | -0.668334 | -4.100258 |
| 6 | -4.397789 | 0.150718  | 4.251270  |
| 6 | -4.564511 | -1.270859 | 4.023404  |
| 6 | -4.561478 | 2.129410  | -3.650317 |
| 6 | -4.673223 | 3.246610  | -2.731437 |
| 6 | -4.890770 | -3.446918 | 2.223414  |

|   |           |           |           |
|---|-----------|-----------|-----------|
| 6 | -5.042801 | -3.961263 | 0.874385  |
| 6 | -4.926351 | 4.248034  | -0.085532 |
| 6 | -5.058889 | 4.043024  | 1.345133  |
| 6 | -5.308445 | -3.534806 | -1.920192 |
| 6 | -5.415924 | -2.651994 | -3.067584 |
| 6 | -5.393792 | 2.367374  | 3.642188  |
| 6 | -5.548095 | 1.008717  | 4.232482  |
| 6 | -5.652917 | -0.047904 | -4.228277 |
| 6 | -5.744485 | 1.425677  | -4.053709 |
| 6 | -5.879927 | -1.819133 | 3.837286  |
| 6 | -6.043993 | -2.975312 | 2.936067  |
| 6 | -5.970034 | 3.669354  | -2.272059 |
| 6 | -6.097211 | 4.216681  | -0.914562 |
| 6 | -6.352125 | -4.039450 | 0.282451  |
| 6 | -6.487080 | -3.855590 | -1.165522 |
| 6 | -6.367348 | 3.858639  | 1.922634  |
| 6 | -6.502980 | 3.066494  | 3.102326  |
| 6 | -6.709476 | -2.151266 | -3.465365 |
| 6 | -6.798519 | -0.877233 | -4.097035 |
| 6 | -6.831797 | 0.380922  | 4.400684  |
| 6 | -6.992073 | -0.989324 | 4.225647  |
| 6 | -7.003259 | 2.103787  | -3.868093 |
| 6 | -7.111741 | 3.196631  | -3.019717 |
| 6 | -7.336417 | -3.403992 | 2.450803  |
| 6 | -7.483951 | -3.930687 | 1.178604  |
| 6 | -7.385952 | 4.374556  | -0.258071 |
| 6 | -7.517642 | 4.220486  | 1.105826  |
| 6 | -7.775232 | -3.622223 | -1.804774 |
| 6 | -7.884570 | -2.820319 | -2.919305 |
| 1 | 8.873666  | 2.566603  | -3.325416 |
| 1 | 8.684554  | 4.010390  | -1.328241 |
| 1 | 8.513143  | -4.234221 | 1.571018  |
| 1 | 8.284026  | -4.515079 | -0.873170 |
| 1 | 8.493111  | 4.135326  | 0.798924  |
| 1 | 8.231788  | 3.201071  | 3.052308  |
| 1 | 8.106251  | -3.608832 | -2.806225 |
| 1 | 7.915691  | -1.676616 | -4.303767 |
| 1 | 8.005346  | 1.411104  | 4.234239  |
| 1 | 7.723978  | -1.004546 | 4.541776  |
| 1 | 7.798970  | 0.452731  | -4.250521 |
| 1 | 7.519218  | -2.815229 | 3.432483  |
| 1 | -7.519202 | 2.815397  | 3.432395  |
| 1 | -7.798986 | -0.452875 | -4.250458 |
| 1 | -7.723981 | 1.004717  | 4.541727  |
| 1 | -8.005353 | -1.410942 | 4.234267  |
| 1 | -7.915693 | 1.676447  | -4.303813 |
| 1 | -8.106251 | 3.608726  | -2.806353 |
| 1 | -8.231789 | -3.200960 | 3.052422  |
| 1 | -8.493110 | -4.135304 | 0.799075  |
| 1 | -8.284023 | 4.515061  | -0.873341 |
| 1 | -8.513143 | 4.234288  | 1.570858  |
| 1 | -8.684552 | -4.010450 | -1.328090 |
| 1 | -8.873670 | -2.566720 | -3.325307 |

Nanotube (7,5) u06v05  
B3LYP/STO-3G Energy: -5811.688012

|   |           |           |           |
|---|-----------|-----------|-----------|
| 6 | -8.023447 | -2.113178 | -3.405073 |
| 6 | -7.872966 | -3.171323 | -2.537117 |
| 6 | -7.656003 | 3.669440  | 2.284928  |
| 6 | -7.562348 | 4.170249  | 1.004308  |
| 6 | -7.496102 | -4.228192 | 0.260599  |
| 6 | -7.321207 | -4.041259 | 1.620694  |
| 6 | -7.342169 | 3.743039  | -1.972434 |
| 6 | -7.239146 | 2.906759  | -3.074065 |
| 6 | -6.964809 | -2.155122 | 3.947330  |
| 6 | -6.821463 | -0.873365 | 4.464870  |
| 6 | -6.996684 | 0.089717  | -4.065246 |

|   |           |           |           |
|---|-----------|-----------|-----------|
| 6 | -6.872696 | -1.301139 | -3.785968 |
| 6 | -6.570884 | 2.062364  | 3.893908  |
| 6 | -6.478919 | 3.133455  | 2.956614  |
| 6 | -6.564334 | -3.534202 | -2.007631 |
| 6 | -6.387311 | -4.079451 | -0.659779 |
| 6 | -6.288443 | 4.212302  | 0.301046  |
| 6 | -6.187993 | 4.032804  | -1.152470 |
| 6 | -6.021633 | -3.722138 | 2.169984  |
| 6 | -5.850231 | -2.832488 | 3.332363  |
| 6 | -5.974672 | 2.325341  | -3.454124 |
| 6 | -5.866313 | 0.948860  | -4.003411 |
| 6 | -5.551925 | -0.194587 | 4.434775  |
| 6 | -5.435615 | 1.272371  | 4.212075  |
| 6 | -5.561761 | -1.860950 | -3.560284 |
| 6 | -5.411086 | -3.007151 | -2.681994 |
| 6 | -5.188694 | 3.489744  | 2.418572  |
| 6 | -5.096806 | 4.057062  | 1.085763  |
| 6 | -5.063407 | -4.128866 | -0.097560 |
| 6 | -4.881476 | -3.972273 | 1.334531  |
| 6 | -4.897062 | 3.769836  | -1.732595 |
| 6 | -4.792414 | 2.927011  | -2.909332 |
| 6 | -4.538747 | -2.321543 | 3.623342  |
| 6 | -4.388314 | -1.002635 | 4.206270  |
| 6 | -4.547691 | 0.343581  | -4.068312 |
| 6 | -4.401311 | -1.077446 | -3.902741 |
| 6 | -4.122371 | 1.811511  | 3.900718  |
| 6 | -4.002283 | 2.960403  | 3.044815  |
| 6 | -4.076846 | -3.381796 | -2.247790 |
| 6 | -3.902479 | -3.983398 | -0.960915 |
| 6 | -3.789884 | 4.149902  | 0.456220  |
| 6 | -3.689639 | 4.043469  | -0.968237 |
| 6 | -3.539149 | -3.753749 | 1.856007  |
| 6 | -3.366850 | -2.955460 | 3.033178  |
| 6 | -3.473528 | 2.457240  | -3.325380 |
| 6 | -3.356158 | 1.172610  | -3.958140 |
| 6 | -3.057208 | -0.404421 | 4.264905  |
| 6 | -2.926693 | 1.024037  | 4.162651  |
| 6 | -3.074341 | -1.655534 | -3.740721 |
| 6 | -2.917823 | -2.846309 | -2.939131 |
| 6 | -2.692925 | 3.365394  | 2.553391  |
| 6 | -2.592260 | 4.004002  | 1.260253  |
| 6 | -2.567243 | -4.115965 | -0.409467 |
| 6 | -2.387142 | -4.039192 | 1.027043  |
| 6 | -2.389018 | 3.866827  | -1.581480 |
| 6 | -2.286845 | 3.091115  | -2.806252 |
| 6 | -2.042758 | -2.511793 | 3.408503  |
| 6 | -1.890444 | -1.227720 | 4.075742  |
| 6 | -2.050044 | 0.577121  | -4.124502 |
| 6 | -1.912911 | -0.869344 | -4.058307 |
| 6 | -1.623058 | 1.605452  | 3.944773  |
| 6 | -1.508057 | 2.824090  | 3.159461  |
| 6 | -1.597490 | -3.262773 | -2.536671 |
| 6 | -1.424226 | -3.940860 | -1.264763 |
| 6 | -1.299517 | 4.145008  | 0.637457  |
| 6 | -1.201209 | 4.108270  | -0.808977 |
| 6 | -1.063746 | -3.862934 | 1.566334  |
| 6 | -0.891266 | -3.117347 | 2.795761  |
| 6 | -0.989108 | 2.646616  | -3.253362 |
| 6 | -0.872396 | 1.391133  | -3.956719 |
| 6 | -0.578160 | -0.635724 | 4.173999  |
| 6 | -0.443649 | 0.800448  | 4.148713  |
| 6 | -0.596934 | -1.451874 | -3.915487 |
| 6 | -0.440758 | -2.680883 | -3.181593 |
| 6 | -0.206958 | 3.240134  | 2.680308  |
| 6 | -0.103207 | 3.940146  | 1.426745  |
| 6 | -0.090159 | -4.083296 | -0.713364 |
| 6 | 0.090159  | -4.083248 | 0.713644  |
| 6 | 0.103202  | 3.940049  | -1.427022 |
| 6 | 0.206955  | 3.239952  | -2.680534 |
| 6 | 0.440760  | -2.680664 | 3.181775  |

|   |          |           |           |
|---|----------|-----------|-----------|
| 6 | 0.596937 | -1.451607 | 3.915585  |
| 6 | 0.443652 | 0.800165  | -4.148769 |
| 6 | 0.578164 | -0.636009 | -4.173955 |
| 6 | 0.872398 | 1.391404  | 3.956619  |
| 6 | 0.989107 | 2.646839  | 3.253175  |
| 6 | 0.891267 | -3.117540 | -2.795548 |
| 6 | 1.063745 | -3.863043 | -1.566070 |
| 6 | 1.201202 | 4.108328  | 0.808690  |
| 6 | 1.299511 | 4.144970  | -0.637746 |
| 6 | 1.424226 | -3.940773 | 1.265032  |
| 6 | 1.597492 | -3.262598 | 2.536893  |
| 6 | 1.508057 | 2.823878  | -3.159658 |
| 6 | 1.623061 | 1.605184  | -3.944883 |
| 6 | 1.912915 | -0.869065 | 4.058362  |
| 6 | 2.050046 | 0.577405  | 4.124457  |
| 6 | 1.890447 | -1.227999 | -4.075656 |
| 6 | 2.042759 | -2.512027 | -3.408330 |
| 6 | 2.286841 | 3.091311  | 2.806033  |
| 6 | 2.389013 | 3.866940  | 1.581209  |
| 6 | 2.387141 | -4.039265 | -1.026767 |
| 6 | 2.567243 | -4.115939 | 0.409749  |
| 6 | 2.592254 | 4.003926  | -1.260533 |
| 6 | 2.692923 | 3.365226  | -2.553626 |
| 6 | 2.917825 | -2.846107 | 2.939321  |
| 6 | 3.074344 | -1.655274 | 3.740829  |
| 6 | 2.926697 | 1.023753  | -4.162714 |
| 6 | 3.057212 | -0.404712 | -4.264871 |
| 6 | 3.356160 | 1.172884  | 3.958048  |
| 6 | 3.473525 | 2.457473  | 3.325204  |
| 6 | 3.366850 | -2.955671 | -3.032975 |
| 6 | 3.539147 | -3.753884 | -1.855752 |
| 6 | 3.689630 | 4.043548  | 0.967955  |
| 6 | 3.789878 | 4.149884  | -0.456510 |
| 6 | 3.902479 | -3.983335 | 0.961187  |
| 6 | 4.076847 | -3.381640 | 2.248017  |
| 6 | 4.002285 | 2.960201  | -3.045013 |
| 6 | 4.122376 | 1.811242  | -3.900828 |
| 6 | 4.401315 | -1.077174 | 3.902801  |
| 6 | 4.547694 | 0.343866  | 4.068277  |
| 6 | 4.388316 | -1.002924 | -4.206194 |
| 6 | 4.538747 | -2.321797 | -3.623183 |
| 6 | 4.792409 | 2.927219  | 2.909125  |
| 6 | 4.897055 | 3.769967  | 1.732332  |
| 6 | 4.881474 | -3.972372 | -1.334261 |
| 6 | 5.063406 | -4.128864 | 0.097841  |
| 6 | 5.096800 | 4.057006  | -1.086042 |
| 6 | 5.188695 | 3.489587  | -2.418807 |
| 6 | 5.411087 | -3.006965 | 2.682194  |
| 6 | 5.561764 | -1.860702 | 3.560402  |
| 6 | 5.435621 | 1.272078  | -4.212135 |
| 6 | 5.551927 | -0.194893 | -4.434743 |
| 6 | 5.866316 | 0.949139  | 4.003331  |
| 6 | 5.974670 | 2.325591  | 3.453959  |
| 6 | 5.850230 | -2.832727 | -3.332171 |
| 6 | 6.021631 | -3.722301 | -2.169737 |
| 6 | 6.187985 | 4.032906  | 1.152193  |
| 6 | 6.288437 | 4.212301  | -0.301336 |
| 6 | 6.387310 | -4.079413 | 0.660059  |
| 6 | 6.564335 | -3.534069 | 2.007871  |
| 6 | 6.478924 | 3.133252  | -2.956809 |
| 6 | 6.570896 | 2.062072  | -3.893993 |
| 6 | 6.872699 | -1.300875 | 3.786047  |
| 6 | 6.996687 | 0.089999  | 4.065220  |
| 6 | 6.821467 | -0.873669 | -4.464782 |
| 6 | 6.964809 | -2.155400 | -3.947179 |
| 6 | 7.239144 | 2.906996  | 3.073866  |
| 6 | 7.342162 | 3.743205  | 1.972179  |
| 6 | 7.321205 | -4.041395 | -1.620428 |
| 6 | 7.496100 | -4.228235 | -0.260310 |
| 6 | 7.562343 | 4.170195  | -1.004588 |

|   |           |           |           |
|---|-----------|-----------|-----------|
| 6 | 7.656006  | 3.669278  | -2.285154 |
| 6 | 7.872967  | -3.171156 | 2.537334  |
| 6 | 8.023449  | -2.112945 | 3.405215  |
| 1 | -9.026637 | -1.785243 | -3.711409 |
| 1 | -8.763394 | -3.688814 | -2.157228 |
| 1 | -8.638977 | 3.544576  | 2.760278  |
| 1 | -8.478026 | 4.446776  | 0.465712  |
| 1 | -8.512108 | -4.352432 | -0.135932 |
| 1 | -8.202211 | -4.020098 | 2.275280  |
| 1 | -8.336854 | 4.066204  | -1.639307 |
| 1 | -8.155749 | 2.586624  | -3.586553 |
| 1 | -7.970598 | -2.588237 | 3.870951  |
| 1 | -7.718592 | -0.326798 | 4.783826  |
| 1 | -8.007211 | 0.518414  | -4.083241 |
| 1 | -7.574086 | 1.712804  | 4.171137  |
| 1 | 7.574155  | 1.712447  | -4.171163 |
| 1 | 8.007232  | 0.518701  | 4.083198  |
| 1 | 7.718598  | -0.327112 | -4.783755 |
| 1 | 7.970593  | -2.588514 | -3.870788 |
| 1 | 8.155739  | 2.586909  | 3.586382  |
| 1 | 8.336828  | 4.066365  | 1.639046  |
| 1 | 8.202201  | -4.020290 | -2.275018 |
| 1 | 8.512088  | -4.352468 | 0.136225  |
| 1 | 8.478022  | 4.446756  | -0.466006 |
| 1 | 8.639002  | 3.544344  | -2.760485 |
| 1 | 8.763394  | -3.688680 | 2.157487  |
| 1 | 9.026637  | -1.784988 | 3.711530  |

Nanotube (7,5) u06v06  
B3LYP/STO-3G Energy: -5886.984712

|   |          |           |           |
|---|----------|-----------|-----------|
| 6 | 8.038454 | 1.080366  | -4.001792 |
| 6 | 7.921697 | 2.327028  | -3.430519 |
| 6 | 7.803582 | -3.039236 | 2.982182  |
| 6 | 7.669817 | -3.850667 | 1.876894  |
| 6 | 7.634790 | 4.071572  | -0.988492 |
| 6 | 7.497740 | 4.242566  | 0.377345  |
| 6 | 7.362409 | -4.202198 | -1.102300 |
| 6 | 7.230520 | -3.675463 | -2.377627 |
| 6 | 7.194232 | 3.022886  | 3.119233  |
| 6 | 7.057182 | 1.918890  | 3.950726  |
| 6 | 6.976275 | -1.202191 | -4.047518 |
| 6 | 6.870477 | 0.213986  | -4.129857 |
| 6 | 6.773535 | -1.061002 | 4.153755  |
| 6 | 6.648780 | -2.334384 | 3.526016  |
| 6 | 6.631309 | 2.832740  | -2.976429 |
| 6 | 6.498048 | 3.707519  | -1.811236 |
| 6 | 6.374447 | -4.057056 | 1.243516  |
| 6 | 6.231447 | -4.255848 | -0.202572 |
| 6 | 6.211153 | 4.093917  | 1.024011  |
| 6 | 6.066642 | 3.534775  | 2.378495  |
| 6 | 5.957651 | -3.192169 | -2.858094 |
| 6 | 5.841181 | -2.001320 | -3.737000 |
| 6 | 5.782297 | 1.270933  | 4.126645  |
| 6 | 5.651177 | -0.201720 | 4.289904  |
| 6 | 5.570273 | 0.832332  | -4.020568 |
| 6 | 5.454341 | 2.167793  | -3.463218 |
| 6 | 5.341167 | -2.802097 | 3.134294  |
| 6 | 5.207358 | -3.692360 | 1.995517  |
| 6 | 5.191102 | 3.921122  | -1.246686 |
| 6 | 5.049389 | 4.139809  | 0.182131  |
| 6 | 4.925009 | -4.134962 | -0.795028 |
| 6 | 4.789152 | -3.619295 | -2.145197 |
| 6 | 4.760489 | 3.133330  | 2.824465  |
| 6 | 4.618075 | 2.008840  | 3.729072  |
| 6 | 4.525943 | -1.413888 | -3.917920 |
| 6 | 4.394774 | 0.004574  | -4.118403 |
| 6 | 4.327215 | -0.786066 | 4.162557  |

|   |           |           |           |
|---|-----------|-----------|-----------|
| 6 | 4.176561  | -2.115043 | 3.634882  |
| 6 | 4.137010  | 2.661819  | -3.105549 |
| 6 | 4.005214  | 3.576776  | -2.012999 |
| 6 | 3.882473  | -3.928327 | 1.447338  |
| 6 | 3.740382  | -4.188508 | 0.046992  |
| 6 | 3.721462  | 4.080635  | 0.776752  |
| 6 | 3.577080  | 3.610691  | 2.121818  |
| 6 | 3.461419  | -3.251285 | -2.629087 |
| 6 | 3.332739  | -2.169223 | -3.563622 |
| 6 | 3.285537  | 1.462115  | 3.971383  |
| 6 | 3.143583  | 0.057896  | 4.242793  |
| 6 | 3.077438  | 0.624401  | -4.072764 |
| 6 | 2.953670  | 1.982551  | -3.603540 |
| 6 | 2.850959  | -2.616679 | 3.299793  |
| 6 | 2.709169  | -3.565972 | 2.219929  |
| 6 | 2.686998  | 3.866542  | -1.479132 |
| 6 | 2.547691  | 4.161572  | -0.068310 |
| 6 | 2.421906  | -4.157848 | -0.555059 |
| 6 | 2.286221  | -3.716719 | -1.931591 |
| 6 | 2.260020  | 3.294408  | 2.631353  |
| 6 | 2.118308  | 2.225026  | 3.606961  |
| 6 | 2.024856  | -1.616309 | -3.838533 |
| 6 | 1.899960  | -0.200727 | -4.143382 |
| 6 | 1.830491  | -0.543293 | 4.216155  |
| 6 | 1.686516  | -1.922289 | 3.777055  |
| 6 | 1.648088  | 2.510139  | -3.288835 |
| 6 | 1.517728  | 3.496460  | -2.231945 |
| 6 | 1.398090  | -3.849076 | 1.691254  |
| 6 | 1.256704  | -4.183334 | 0.286460  |
| 6 | 1.238504  | 4.148745  | 0.532322  |
| 6 | 1.096186  | 3.740837  | 1.915277  |
| 6 | 0.978039  | -3.382653 | -2.439509 |
| 6 | 0.847715  | -2.343298 | -3.434636 |
| 6 | 0.806013  | 1.694878  | 3.886675  |
| 6 | 0.662287  | 0.301877  | 4.235001  |
| 6 | 0.593969  | 0.418492  | -4.120563 |
| 6 | 0.468786  | 1.799538  | -3.729362 |
| 6 | 0.370703  | -2.432252 | 3.457505  |
| 6 | 0.227107  | -3.432764 | 2.432731  |
| 6 | 0.202335  | 3.797034  | -1.701775 |
| 6 | 0.063604  | 4.162612  | -0.317730 |
| 6 | -0.063606 | -4.162633 | -0.317494 |
| 6 | -0.202336 | -3.797134 | -1.701560 |
| 6 | -0.227109 | 3.432901  | 2.432537  |
| 6 | -0.370703 | 2.432447  | 3.457367  |
| 6 | -0.468784 | -1.799753 | -3.729262 |
| 6 | -0.593967 | -0.418729 | -4.120541 |
| 6 | -0.662285 | -0.301638 | 4.235018  |
| 6 | -0.806012 | -1.694658 | 3.886771  |
| 6 | -0.847713 | 2.343099  | -3.434769 |
| 6 | -0.978039 | 3.382510  | -2.439701 |
| 6 | -1.096188 | -3.740728 | 1.915489  |
| 6 | -1.238507 | -4.148715 | 0.532556  |
| 6 | -1.256706 | 4.183347  | 0.286221  |
| 6 | -1.398091 | 3.849169  | 1.691035  |
| 6 | -1.517728 | -3.496588 | -2.231748 |
| 6 | -1.648087 | -2.510329 | -3.288696 |
| 6 | -1.686515 | 1.922502  | 3.776947  |
| 6 | -1.830489 | 0.543531  | 4.216126  |
| 6 | -1.899957 | 0.200489  | -4.143399 |
| 6 | -2.024854 | 1.616088  | -3.838628 |
| 6 | -2.118309 | -2.224821 | 3.607088  |
| 6 | -2.260023 | -3.294256 | 2.631539  |
| 6 | -2.286221 | 3.716604  | -1.931804 |
| 6 | -2.421908 | 4.157811  | -0.555297 |
| 6 | -2.547694 | -4.161573 | -0.068075 |
| 6 | -2.687000 | -3.866626 | -1.478914 |
| 6 | -2.709169 | 3.566094  | 2.219726  |
| 6 | -2.850958 | 2.616864  | 3.299645  |
| 6 | -2.953668 | -1.982758 | -3.603434 |

|   |           |           |           |
|---|-----------|-----------|-----------|
| 6 | -3.077436 | -0.624635 | -4.072737 |
| 6 | -3.143581 | -0.057655 | 4.242801  |
| 6 | -3.285537 | -1.461889 | 3.971469  |
| 6 | -3.332737 | 2.169018  | -3.563749 |
| 6 | -3.461419 | 3.251131  | -2.629274 |
| 6 | -3.577083 | -3.610564 | 2.122021  |
| 6 | -3.721466 | -4.080584 | 0.776981  |
| 6 | -3.740383 | 4.188503  | 0.046752  |
| 6 | -3.882474 | 3.928403  | 1.447113  |
| 6 | -4.005216 | -3.576888 | -2.012800 |
| 6 | -4.137009 | -2.661996 | -3.105405 |
| 6 | -4.176559 | 2.115249  | 3.634767  |
| 6 | -4.327211 | 0.786304  | 4.162523  |
| 6 | -4.394772 | -0.004809 | -4.118413 |
| 6 | -4.525941 | 1.413663  | -3.918008 |
| 6 | -4.618076 | -2.008625 | 3.729190  |
| 6 | -4.760492 | -3.133163 | 2.824643  |
| 6 | -4.789152 | 3.619167  | -2.145405 |
| 6 | -4.925011 | 4.134908  | -0.795264 |
| 6 | -5.049393 | -4.139789 | 0.182363  |
| 6 | -5.191105 | -3.921187 | -1.246467 |
| 6 | -5.207358 | 3.692468  | 1.995308  |
| 6 | -5.341164 | 2.802276  | 3.134142  |
| 6 | -5.454340 | -2.167990 | -3.463105 |
| 6 | -5.570271 | -0.832561 | -4.020532 |
| 6 | -5.651174 | 0.201968  | 4.289913  |
| 6 | -5.782297 | -1.270695 | 4.126729  |
| 6 | -5.841179 | 2.001106  | -3.737121 |
| 6 | -5.957650 | 3.192003  | -2.858280 |
| 6 | -6.066645 | -3.534630 | 2.378695  |
| 6 | -6.211158 | -4.093846 | 1.024241  |
| 6 | -6.231449 | 4.255826  | -0.202815 |
| 6 | -6.374447 | 4.057119  | 1.243286  |
| 6 | -6.498050 | -3.707614 | -1.811030 |
| 6 | -6.631309 | -2.832906 | -2.976276 |
| 6 | -6.648775 | 2.334591  | 3.525901  |
| 6 | -6.773528 | 1.061251  | 4.153729  |
| 6 | -6.870475 | -0.214220 | -4.129859 |
| 6 | -6.976274 | 1.201961  | -4.047595 |
| 6 | -7.057182 | -1.918665 | 3.950852  |
| 6 | -7.194233 | -3.022704 | 3.119413  |
| 6 | -7.230520 | 3.675321  | -2.377840 |
| 6 | -7.362411 | 4.202122  | -1.102539 |
| 6 | -7.497745 | -4.242525 | 0.377582  |
| 6 | -7.634794 | -4.071610 | -0.988265 |
| 6 | -7.669817 | 3.850768  | 1.876681  |
| 6 | -7.803578 | 3.039409  | 2.982022  |
| 6 | -7.921696 | -2.327221 | -3.430398 |
| 6 | -8.038452 | -1.080593 | -4.001748 |
| 1 | 9.029136  | 0.670165  | -4.242087 |
| 1 | 8.826393  | 2.912148  | -3.220786 |
| 1 | 8.800444  | -2.807917 | 3.382508  |
| 1 | 8.567414  | -4.267394 | 1.402012  |
| 1 | 8.639418  | 4.075770  | -1.430207 |
| 1 | 8.396452  | 4.378157  | 0.992776  |
| 1 | 8.364306  | -4.445536 | -0.726114 |
| 1 | 8.132016  | -3.512190 | -2.982253 |
| 1 | 8.199522  | 3.411034  | 2.911153  |
| 1 | 7.958635  | 1.461433  | 4.378591  |
| 1 | 7.981947  | -1.636799 | -3.983429 |
| 1 | 7.785363  | -0.663699 | 4.304601  |
| 1 | -7.785362 | 0.663955  | 4.304594  |
| 1 | -7.981943 | 1.636574  | -3.983538 |
| 1 | -7.958633 | -1.461193 | 4.378701  |
| 1 | -8.199520 | -3.410866 | 2.911359  |
| 1 | -8.132015 | 3.512016  | -2.982458 |
| 1 | -8.364311 | 4.445471  | -0.726364 |
| 1 | -8.396458 | -4.378075 | 0.993020  |
| 1 | -8.639423 | -4.075824 | -1.429980 |
| 1 | -8.567414 | 4.267468  | 1.401774  |



|   |           |           |           |
|---|-----------|-----------|-----------|
| 1 | -8.800440 | 2.808120  | 3.382367  |
| 1 | -8.826393 | -2.912327 | -3.220629 |
| 1 | -9.029131 | -0.670406 | -4.242071 |

Nanotube (7,5) u06v07  
B3LYP/STO-3G Energy: -5962.280995

|   |          |           |           |
|---|----------|-----------|-----------|
| 6 | 8.252134 | 0.058798  | -3.971468 |
| 6 | 8.121009 | 1.408912  | -3.742297 |
| 6 | 7.820482 | -2.134527 | 3.829892  |
| 6 | 7.718334 | -3.202486 | 2.966527  |
| 6 | 7.770561 | 3.717697  | -1.835607 |
| 6 | 7.596635 | 4.231478  | -0.563862 |
| 6 | 7.495506 | -4.306662 | 0.168472  |
| 6 | 7.398959 | -4.125255 | -1.201561 |
| 6 | 7.214156 | 3.754029  | 2.390238  |
| 6 | 7.051328 | 2.899792  | 3.472051  |
| 6 | 7.190364 | -2.165194 | -3.456232 |
| 6 | 7.087085 | -0.819350 | -3.901544 |
| 6 | 6.758017 | 0.070833  | 4.424164  |
| 6 | 6.650460 | -1.320477 | 4.141203  |
| 6 | 6.818708 | 2.006083  | -3.465490 |
| 6 | 6.655312 | 3.148736  | -2.568352 |
| 6 | 6.441002 | -3.573126 | 2.370595  |
| 6 | 6.339128 | -4.136481 | 1.021790  |
| 6 | 6.291534 | 4.247242  | 0.064448  |
| 6 | 6.108212 | 4.053136  | 1.511329  |
| 6 | 6.138857 | -3.790559 | -1.824149 |
| 6 | 6.046210 | -2.866043 | -2.980665 |
| 6 | 5.769817 | 2.310856  | 3.772196  |
| 6 | 5.631919 | 0.929575  | 4.303242  |
| 6 | 5.784227 | -0.201813 | -3.988614 |
| 6 | 5.654413 | 1.231315  | -3.796324 |
| 6 | 5.353858 | -1.882349 | 3.846666  |
| 6 | 5.252608 | -3.036601 | 2.972268  |
| 6 | 5.333784 | 3.494182  | -2.113524 |
| 6 | 5.153549 | 4.071919  | -0.792893 |
| 6 | 5.049557 | -4.183142 | 0.383026  |
| 6 | 4.951275 | -4.031241 | -1.057658 |
| 6 | 4.789251 | 3.773632  | 2.009570  |
| 6 | 4.618801 | 2.916498  | 3.167380  |
| 6 | 4.736883 | -2.353430 | -3.340790 |
| 6 | 4.611649 | -1.034058 | -3.900952 |
| 6 | 4.312163 | 0.323586  | 4.292443  |
| 6 | 4.175998 | -1.097716 | 4.120161  |
| 6 | 4.328835 | 1.792613  | -3.611933 |
| 6 | 4.168944 | 2.957446  | -2.796342 |
| 6 | 3.944499 | -3.415697 | 2.467420  |
| 6 | 3.842343 | -4.028306 | 1.178041  |
| 6 | 3.810169 | 4.160890  | -0.239354 |
| 6 | 3.627547 | 4.049593  | 1.175903  |
| 6 | 3.637759 | -3.808086 | -1.654706 |
| 6 | 3.534378 | -3.000840 | -2.836047 |
| 6 | 3.279260 | 2.440609  | 3.502093  |
| 6 | 3.127537 | 1.152164  | 4.117470  |
| 6 | 3.293459 | -0.431298 | -4.048528 |
| 6 | 3.158038 | 1.000161  | -3.947876 |
| 6 | 2.860284 | -1.677532 | 3.886949  |
| 6 | 2.749194 | -2.873745 | 3.087487  |
| 6 | 2.836572 | 3.368004  | -2.390566 |
| 6 | 2.659435 | 4.016700  | -1.109237 |
| 6 | 2.540653 | -4.163350 | 0.552528  |
| 6 | 2.443025 | -4.089565 | -0.892483 |
| 6 | 2.295008 | 3.867331  | 1.713069  |
| 6 | 2.123002 | 3.079907  | 2.922069  |
| 6 | 2.233488 | -2.544759 | -3.277026 |
| 6 | 2.117293 | -1.254692 | -3.935653 |
| 6 | 1.813831 | 0.555273  | 4.206739  |

|   |           |           |           |
|---|-----------|-----------|-----------|
| 6 | 1.681633  | -0.890374 | 4.134506  |
| 6 | 1.844649  | 1.583418  | -3.814433 |
| 6 | 1.687313  | 2.809599  | -3.053310 |
| 6 | 1.452909  | -3.295379 | 2.615068  |
| 6 | 1.351784  | -3.982799 | 1.341414  |
| 6 | 1.334607  | 4.155074  | -0.561895 |
| 6 | 1.152883  | 4.114634  | 0.875717  |
| 6 | 1.149171  | -3.906742 | -1.503969 |
| 6 | 1.046320  | -3.153709 | -2.733600 |
| 6 | 0.802386  | 2.630855  | 3.289318  |
| 6 | 0.646744  | 1.369441  | 3.974883  |
| 6 | 0.811765  | -0.658482 | -4.105472 |
| 6 | 0.677113  | 0.776229  | -4.085944 |
| 6 | 0.376209  | -1.475074 | 3.921186  |
| 6 | 0.261673  | -2.710403 | 3.189826  |
| 6 | 0.359280  | 3.230462  | -2.654490 |
| 6 | 0.183952  | 3.942852  | -1.417842 |
| 6 | 0.049981  | -4.129312 | 0.717225  |
| 6 | -0.049981 | -4.129339 | -0.717062 |
| 6 | -0.183955 | 3.942907  | 1.417688  |
| 6 | -0.359282 | 3.230566  | 2.654364  |
| 6 | -0.261671 | -2.710527 | -3.189719 |
| 6 | -0.376207 | -1.475226 | -3.921128 |
| 6 | -0.677111 | 0.776389  | 4.085915  |
| 6 | -0.811764 | -0.658322 | 4.105500  |
| 6 | -0.646743 | 1.369286  | -3.974938 |
| 6 | -0.802387 | 2.630726  | -3.289422 |
| 6 | -1.046319 | -3.153602 | 2.733725  |
| 6 | -1.149172 | -3.906683 | 1.504123  |
| 6 | -1.152886 | 4.114598  | -0.875878 |
| 6 | -1.334610 | 4.155095  | 0.561733  |
| 6 | -1.351784 | -3.982850 | -1.341258 |
| 6 | -1.452908 | -3.295480 | -2.614939 |
| 6 | -1.687314 | 2.809717  | 3.053201  |
| 6 | -1.844648 | 1.583566  | 3.814373  |
| 6 | -1.681631 | -0.890536 | -4.134473 |
| 6 | -1.813829 | 0.555108  | -4.206763 |
| 6 | -2.117291 | -1.254539 | 3.935705  |
| 6 | -2.233487 | -2.544631 | 3.277128  |
| 6 | -2.123003 | 3.079791  | -2.922190 |
| 6 | -2.295010 | 3.867261  | -1.713220 |
| 6 | -2.443026 | -4.089528 | 0.892643  |
| 6 | -2.540653 | -4.163368 | -0.552365 |
| 6 | -2.659437 | 4.016740  | 1.109081  |
| 6 | -2.836573 | 3.368096  | 2.390435  |
| 6 | -2.749192 | -2.873864 | -3.087377 |
| 6 | -2.860282 | -1.677684 | -3.886887 |
| 6 | -3.158037 | 1.000316  | 3.947840  |
| 6 | -3.293457 | -0.431140 | 4.048549  |
| 6 | -3.127536 | 1.152002  | -4.117519 |
| 6 | -3.279261 | 2.440470  | -3.502190 |
| 6 | -3.534377 | -3.000728 | 2.836166  |
| 6 | -3.637760 | -3.808018 | 1.654856  |
| 6 | -3.627550 | 4.049542  | -1.176060 |
| 6 | -3.810172 | 4.160894  | 0.239191  |
| 6 | -3.842343 | -4.028347 | -1.177884 |
| 6 | -3.944497 | -3.415791 | -2.467289 |
| 6 | -4.168945 | 2.957553  | 2.796228  |
| 6 | -4.328835 | 1.792754  | 3.611867  |
| 6 | -4.175995 | -1.097878 | -4.120125 |
| 6 | -4.312162 | 0.323417  | -4.292463 |
| 6 | -4.611647 | -1.033905 | 3.900999  |
| 6 | -4.736881 | -2.353299 | 3.340886  |
| 6 | -4.618803 | 2.916370  | -3.167495 |
| 6 | -4.789255 | 3.773547  | -2.009717 |
| 6 | -4.951276 | -4.031193 | 1.057815  |
| 6 | -5.049557 | -4.183149 | -0.382864 |
| 6 | -5.153552 | 4.071945  | 0.792734  |
| 6 | -5.333786 | 3.494261  | 2.113389  |
| 6 | -5.252605 | -3.036717 | -2.972155 |

|   |           |           |           |
|---|-----------|-----------|-----------|
| 6 | -5.353855 | -1.882501 | -3.846600 |
| 6 | -5.654412 | 1.231463  | 3.796281  |
| 6 | -5.784226 | -0.201657 | 3.988631  |
| 6 | -5.631919 | 0.929405  | -4.303284 |
| 6 | -5.769817 | 2.310706  | -3.772291 |
| 6 | -6.046209 | -2.865926 | 2.980785  |
| 6 | -6.138857 | -3.790479 | 1.824298  |
| 6 | -6.108217 | 4.053069  | -1.511487 |
| 6 | -6.291537 | 4.247231  | -0.064613 |
| 6 | -6.339128 | -4.136516 | -1.021631 |
| 6 | -6.441000 | -3.573219 | -2.370462 |
| 6 | -6.655314 | 3.148834  | 2.568232  |
| 6 | -6.818708 | 2.006218  | 3.465418  |
| 6 | -6.650458 | -1.320641 | -4.141161 |
| 6 | -6.758018 | 0.070658  | -4.424169 |
| 6 | -7.087083 | -0.819199 | 3.901591  |
| 6 | -7.190361 | -2.165060 | 3.456332  |
| 6 | -7.051327 | 2.899658  | -3.472173 |
| 6 | -7.214158 | 3.753930  | -2.390388 |
| 6 | -7.398960 | -4.125192 | 1.201718  |
| 6 | -7.495504 | -4.306661 | -0.168306 |
| 6 | -7.596639 | 4.231490  | 0.563697  |
| 6 | -7.770564 | 3.717761  | 1.835464  |
| 6 | -7.718330 | -3.202608 | -2.966416 |
| 6 | -7.820478 | -2.134684 | -3.829824 |
| 6 | -8.121008 | 1.409058  | 3.742252  |
| 6 | -8.252132 | 0.058953  | 3.971476  |
| 1 | 9.248355  | -0.393235 | -4.074675 |
| 1 | 9.019795  | 2.034651  | -3.668220 |
| 1 | 8.805162  | -1.802024 | 4.186665  |
| 1 | 8.628661  | -3.722043 | 2.640571  |
| 1 | 8.786675  | 3.614450  | -2.237196 |
| 1 | 8.478061  | 4.525581  | 0.020480  |
| 1 | 8.486363  | -4.439104 | 0.621550  |
| 1 | 8.316507  | -4.116748 | -1.804072 |
| 1 | 8.225386  | 4.082931  | 2.118367  |
| 1 | 7.938831  | 2.573188  | 4.029435  |
| 1 | 8.193597  | -2.562920 | -3.257226 |
| 1 | 7.765086  | 0.500656  | 4.497422  |
| 1 | -7.765087 | 0.500480  | -4.497437 |
| 1 | -8.193610 | -2.562793 | 3.257329  |
| 1 | -7.938829 | 2.573042  | -4.029555 |
| 1 | -8.225393 | 4.082843  | -2.118530 |
| 1 | -8.316510 | -4.116650 | 1.804226  |
| 1 | -8.486359 | -4.439126 | -0.621376 |
| 1 | -8.478065 | 4.525567  | -0.020658 |
| 1 | -8.786677 | 3.614526  | 2.237055  |
| 1 | -8.628657 | -3.722155 | -2.640443 |
| 1 | -8.805157 | -1.802197 | -4.186613 |
| 1 | -9.019795 | 2.034794  | 3.668150  |
| 1 | -9.248355 | -0.393078 | 4.074697  |

Nanotube (7,5) u06v08

B3LYP/STO-3G Energy: -6037.576935

|   |          |           |           |
|---|----------|-----------|-----------|
| 6 | 8.245466 | -4.038720 | 0.949804  |
| 6 | 8.109010 | -4.158126 | -0.413399 |
| 6 | 8.039837 | 4.077422  | 1.080315  |
| 6 | 7.923619 | 3.518640  | 2.332978  |
| 6 | 7.792983 | -2.893748 | -3.131679 |
| 6 | 7.650496 | -1.791180 | -3.952618 |
| 6 | 7.637900 | 1.100644  | 4.113327  |
| 6 | 7.504231 | -0.266534 | 4.287591  |
| 6 | 7.352669 | 1.197275  | -4.244008 |
| 6 | 7.224974 | 2.464756  | -3.694539 |
| 6 | 7.217929 | -2.941185 | 2.969202  |
| 6 | 7.090289 | -3.711330 | 1.782715  |
| 6 | 6.976646 | 4.116009  | -1.202887 |

|   |           |           |           |
|---|-----------|-----------|-----------|
| 6 | 6.871784  | 4.200289  | 0.213557  |
| 6 | 6.809451  | -4.003411 | -1.060138 |
| 6 | 6.661853  | -3.424048 | -2.392651 |
| 6 | 6.633755  | 3.070210  | 2.844137  |
| 6 | 6.501871  | 1.914161  | 3.732951  |
| 6 | 6.362588  | -1.149938 | -4.127605 |
| 6 | 6.220534  | 0.301918  | -4.309440 |
| 6 | 6.224413  | -0.919321 | 4.125870  |
| 6 | 6.092623  | -2.269585 | 3.527986  |
| 6 | 5.955190  | 2.941150  | -3.201868 |
| 6 | 5.840914  | 3.809850  | -2.002439 |
| 6 | 5.779589  | -3.915551 | 1.209492  |
| 6 | 5.642562  | -4.091612 | -0.224868 |
| 6 | 5.571814  | 4.093779  | 0.832927  |
| 6 | 5.456899  | 3.546763  | 2.172691  |
| 6 | 5.350380  | -3.035102 | -2.842623 |
| 6 | 5.202484  | -1.901904 | -3.739641 |
| 6 | 5.196613  | 1.344490  | 3.944895  |
| 6 | 5.059671  | -0.084203 | 4.167034  |
| 6 | 4.917447  | 0.892325  | -4.168509 |
| 6 | 4.784320  | 2.234980  | -3.634804 |
| 6 | 4.770045  | -2.712081 | 3.127259  |
| 6 | 4.617541  | -3.585534 | 1.993656  |
| 6 | 4.526171  | 3.989659  | -1.413145 |
| 6 | 4.395914  | 4.188746  | 0.005380  |
| 6 | 4.318310  | -4.017373 | -0.812918 |
| 6 | 4.171738  | -3.522789 | -2.147744 |
| 6 | 4.139616  | 3.190809  | 2.669430  |
| 6 | 4.009396  | 2.105566  | 3.592782  |
| 6 | 3.874860  | -1.351722 | -3.967786 |
| 6 | 3.732073  | 0.049041  | -4.222937 |
| 6 | 3.729508  | -0.682015 | 4.106686  |
| 6 | 3.587601  | -2.025495 | 3.627370  |
| 6 | 3.457920  | 2.716433  | -3.259173 |
| 6 | 3.331371  | 3.641200  | -2.169451 |
| 6 | 3.290371  | -3.841916 | 1.449541  |
| 6 | 3.145062  | -4.103529 | 0.040993  |
| 6 | 3.078513  | 4.145169  | 0.626278  |
| 6 | 2.955812  | 3.682293  | 1.986609  |
| 6 | 2.847565  | -3.196101 | -2.647347 |
| 6 | 2.701107  | -2.122330 | -3.603710 |
| 6 | 2.692469  | 1.571315  | 3.886212  |
| 6 | 2.556719  | 0.160240  | 4.187194  |
| 6 | 2.415274  | 0.652623  | -4.184707 |
| 6 | 2.281318  | 2.024949  | -3.731276 |
| 6 | 2.270438  | -2.531980 | 3.301693  |
| 6 | 2.124125  | -3.490401 | 2.220613  |
| 6 | 2.023813  | 3.914671  | -1.614107 |
| 6 | 1.900293  | 4.215156  | -0.197619 |
| 6 | 1.829814  | -4.083608 | -0.555554 |
| 6 | 1.683739  | -3.658759 | -1.935551 |
| 6 | 1.650843  | 3.369290  | 2.516907  |
| 6 | 1.522712  | 2.319371  | 3.510483  |
| 6 | 1.390280  | -1.592078 | -3.880605 |
| 6 | 1.248719  | -0.187919 | -4.212227 |
| 6 | 1.246484  | -0.442019 | 4.172725  |
| 6 | 1.104288  | -1.820549 | 3.758679  |
| 6 | 0.974173  | 2.531280  | -3.391243 |
| 6 | 0.845836  | 3.517111  | -2.342897 |
| 6 | 0.809264  | -3.766882 | 1.689484  |
| 6 | 0.662457  | -4.105432 | 0.295401  |
| 6 | 0.594495  | 4.192236  | 0.422840  |
| 6 | 0.470478  | 3.804693  | 1.804535  |
| 6 | 0.364959  | -3.343408 | -2.444501 |
| 6 | 0.218466  | -2.329929 | -3.454800 |
| 6 | 0.207284  | 1.789598  | 3.815344  |
| 6 | 0.070588  | 0.408108  | 4.187460  |
| 6 | -0.070596 | 0.417477  | -4.186537 |
| 6 | -0.207288 | 1.798133  | -3.811342 |
| 6 | -0.218469 | -2.337658 | 3.449596  |

|   |           |           |           |
|---|-----------|-----------|-----------|
| 6 | -0.364958 | -3.348877 | 2.437035  |
| 6 | -0.470472 | 3.808730  | -1.796034 |
| 6 | -0.594486 | 4.193177  | -0.413475 |
| 6 | -0.662452 | -4.104762 | -0.304566 |
| 6 | -0.809261 | -3.763088 | -1.697887 |
| 6 | -0.845832 | 3.511857  | 2.350743  |
| 6 | -0.974175 | 2.523683  | 3.396880  |
| 6 | -1.104293 | -1.812131 | -3.762723 |
| 6 | -1.246491 | -0.432681 | -4.173692 |
| 6 | -1.248727 | -0.197343 | 4.211794  |
| 6 | -1.390285 | -1.600760 | 3.877042  |
| 6 | -1.522714 | 2.327227  | -3.505294 |
| 6 | -1.650839 | 3.374925  | -2.509377 |
| 6 | -1.683737 | -3.663092 | 1.927380  |
| 6 | -1.829809 | -4.084850 | 0.546435  |
| 6 | -1.900284 | 4.214713  | 0.207034  |
| 6 | -2.023807 | 3.911053  | 1.622844  |
| 6 | -2.124124 | -3.485420 | -2.228393 |
| 6 | -2.270441 | -2.524582 | -3.307324 |
| 6 | -2.281323 | 2.016594  | 3.735775  |
| 6 | -2.415282 | 0.643259  | 4.186141  |
| 6 | -2.556726 | 0.169611  | -4.186810 |
| 6 | -2.692473 | 1.580011  | -3.882685 |
| 6 | -2.701111 | -2.130393 | 3.598962  |
| 6 | -2.847564 | -3.202029 | 2.640206  |
| 6 | -2.955806 | 3.686748  | -1.978382 |
| 6 | -3.078504 | 4.146581  | -0.617019 |
| 6 | -3.145057 | -4.103439 | -0.050155 |
| 6 | -3.290367 | -3.838667 | -1.458112 |
| 6 | -3.331367 | 3.636342  | 2.177570  |
| 6 | -3.457923 | 2.709133  | 3.265215  |
| 6 | -3.587606 | -2.017369 | -3.631862 |
| 6 | -3.729516 | -0.672822 | -4.108174 |
| 6 | -3.732083 | 0.039592  | 4.223018  |
| 6 | -3.874866 | -1.360600 | 3.964749  |
| 6 | -4.009398 | 2.113609  | -3.588062 |
| 6 | -4.139612 | 3.196794  | -2.662298 |
| 6 | -4.171735 | -3.527605 | 2.139875  |
| 6 | -4.318305 | -4.019202 | 0.803946  |
| 6 | -4.395904 | 4.188775  | 0.003973  |
| 6 | -4.526164 | 3.986503  | 1.422046  |
| 6 | -4.617538 | -3.581070 | -2.001649 |
| 6 | -4.770047 | -2.705076 | -3.133290 |
| 6 | -4.784326 | 2.226840  | 3.639760  |
| 6 | -4.917457 | 0.882995  | 4.170462  |
| 6 | -5.059678 | -0.074876 | -4.167181 |
| 6 | -5.196618 | 1.353320  | -3.941862 |
| 6 | -5.202489 | -1.910276 | 3.735377  |
| 6 | -5.350380 | -3.041473 | 2.835839  |
| 6 | -5.456892 | 3.551647  | -2.164768 |
| 6 | -5.571804 | 4.095668  | -0.823786 |
| 6 | -5.642557 | -4.092130 | 0.215732  |
| 6 | -5.779584 | -3.912853 | -1.218229 |
| 6 | -5.840910 | 3.805372  | 2.010928  |
| 6 | -5.955192 | 2.933978  | 3.208399  |
| 6 | -6.092627 | -2.261686 | -3.533020 |
| 6 | -6.224421 | -0.910083 | -4.127874 |
| 6 | -6.220543 | 0.292272  | 4.310066  |
| 6 | -6.362594 | -1.159176 | 4.125004  |
| 6 | -6.501873 | 1.922524  | -3.728650 |
| 6 | -6.633750 | 3.076597  | -2.837274 |
| 6 | -6.661852 | -3.429422 | 2.385000  |
| 6 | -6.809446 | -4.005807 | 1.051197  |
| 6 | -6.871775 | 4.200798  | -0.204181 |
| 6 | -6.976639 | 4.113336  | 1.212067  |
| 6 | -7.090285 | -3.707357 | -1.790994 |
| 6 | -7.217930 | -2.934549 | -2.975747 |
| 6 | -7.224980 | 2.456478  | 3.699984  |
| 6 | -7.352680 | 1.187770  | 4.246614  |
| 6 | -7.504237 | -0.256930 | -4.288130 |

|   |           |           |           |
|---|-----------|-----------|-----------|
| 6 | -7.637903 | 1.109856  | -4.110826 |
| 6 | -7.650502 | -1.800034 | 3.948591  |
| 6 | -7.792983 | -2.900776 | 3.125207  |
| 6 | -7.923613 | 3.523903  | -2.325122 |
| 6 | -8.039827 | 4.079888  | -1.071217 |
| 6 | -8.109004 | -4.159088 | 0.404113  |
| 6 | -8.245460 | -4.036627 | -0.958820 |
| 1 | 9.242114  | -4.054070 | 1.412322  |
| 1 | 9.003622  | -4.274770 | -1.038638 |
| 1 | 9.030576  | 4.313037  | 0.667531  |
| 1 | 8.828752  | 3.313862  | 2.919220  |
| 1 | 8.798010  | -3.286123 | -2.930793 |
| 1 | 8.545070  | -1.327487 | -4.388043 |
| 1 | 8.640994  | 1.545729  | 4.124508  |
| 1 | 8.405324  | -0.876469 | 4.432346  |
| 1 | 8.353603  | 0.822224  | -4.493056 |
| 1 | 8.129045  | 3.062857  | -3.521689 |
| 1 | 8.229701  | -2.677022 | 3.302401  |
| 1 | 7.982100  | 4.051586  | -1.638171 |
| 1 | -7.982083 | 4.047949  | 1.647207  |
| 1 | -8.229711 | -2.669631 | -3.308350 |
| 1 | -8.129050 | 3.054963  | 3.528462  |
| 1 | -8.353620 | 0.812162  | 4.494810  |
| 1 | -8.405334 | -0.866538 | -4.434241 |
| 1 | -8.640999 | 1.554966  | -4.121016 |
| 1 | -8.545077 | -1.337313 | 4.385045  |
| 1 | -8.798007 | -3.292706 | 2.923452  |
| 1 | -8.828745 | 3.320445  | -2.911825 |
| 1 | -9.030560 | 4.314596  | -0.657912 |
| 1 | -9.003614 | -4.277143 | 1.029089  |
| 1 | -9.242105 | -4.050951 | -1.421374 |

Nanotube (7,5) u06v09  
B3LYP/STO-3G Energy: -6112.872520

|   |           |           |           |
|---|-----------|-----------|-----------|
| 6 | -8.424821 | -3.496352 | -2.010387 |
| 6 | -8.308894 | -3.967003 | -0.723913 |
| 6 | -8.036003 | 4.379312  | -0.044616 |
| 6 | -7.913671 | 4.159253  | -1.397405 |
| 6 | -8.002227 | -3.454119 | 2.231330  |
| 6 | -7.847798 | -2.603731 | 3.308846  |
| 6 | -7.658322 | 2.271923  | -3.736453 |
| 6 | -7.554000 | 0.992996  | -4.255151 |
| 6 | -7.491592 | 0.202596  | 4.360665  |
| 6 | -7.329144 | 1.564699  | 4.157821  |
| 6 | -7.346934 | -1.937895 | -3.668266 |
| 6 | -7.251794 | -2.991511 | -2.721858 |
| 6 | -7.007502 | 3.796952  | 2.179734  |
| 6 | -6.878716 | 4.241622  | 0.835399  |
| 6 | -7.014669 | -4.014443 | -0.049046 |
| 6 | -6.872348 | -3.801588 | 1.387729  |
| 6 | -6.626846 | 3.821424  | -1.995489 |
| 6 | -6.508792 | 2.930379  | -3.149829 |
| 6 | -6.548767 | -2.058413 | 3.652170  |
| 6 | -6.378972 | -0.707005 | 4.202971  |
| 6 | -6.291320 | 0.287433  | -4.257729 |
| 6 | -6.198696 | -1.173294 | -4.027923 |
| 6 | -6.041371 | 2.121495  | 3.817033  |
| 6 | -5.890263 | 3.266429  | 2.884163  |
| 6 | -5.953128 | -3.369781 | -2.211901 |
| 6 | -5.838653 | -3.912824 | -0.870740 |
| 6 | -5.571735 | 4.264684  | 0.220695  |
| 6 | -5.448967 | 4.078102  | -1.213607 |
| 6 | -5.558782 | -3.572868 | 1.932646  |
| 6 | -5.399276 | -2.712726 | 3.092768  |
| 6 | -5.213807 | 2.401031  | -3.491704 |
| 6 | -5.106961 | 1.074969  | -4.074643 |
| 6 | -5.061783 | -0.132018 | 4.232103  |

|   |           |           |           |
|---|-----------|-----------|-----------|
| 6 | -4.892556 | 1.299675  | 4.065151  |
| 6 | -4.892059 | -1.738508 | -3.747659 |
| 6 | -4.774057 | -2.878425 | -2.876587 |
| 6 | -4.563534 | 3.560003  | 2.373596  |
| 6 | -4.406906 | 4.113383  | 1.054911  |
| 6 | -4.521335 | -4.023971 | -0.273743 |
| 6 | -4.381810 | -3.892363 | 1.144352  |
| 6 | -4.133393 | 3.826730  | -1.773661 |
| 6 | -4.014803 | 3.013456  | -2.944905 |
| 6 | -4.063954 | -2.271463 | 3.465274  |
| 6 | -3.895522 | -0.988843 | 4.075923  |
| 6 | -3.792369 | 0.447800  | -4.161652 |
| 6 | -3.687906 | -0.976505 | -4.045617 |
| 6 | -3.551089 | 1.829481  | 3.838819  |
| 6 | -3.388279 | 2.999034  | 3.025795  |
| 6 | -3.460220 | -3.298839 | -2.407208 |
| 6 | -3.338778 | -3.915540 | -1.112828 |
| 6 | -3.081402 | 4.195101  | 0.454937  |
| 6 | -2.948491 | 4.092998  | -0.976077 |
| 6 | -3.057152 | -3.735493 | 1.720831  |
| 6 | -2.900944 | -2.949256 | 2.922406  |
| 6 | -2.706057 | 2.537856  | -3.355343 |
| 6 | -2.598651 | 1.252119  | -4.011652 |
| 6 | -2.565058 | -0.427823 | 4.207177  |
| 6 | -2.395556 | 1.010610  | 4.127899  |
| 6 | -2.386337 | -1.583899 | -3.853551 |
| 6 | -2.275722 | -2.790450 | -3.055184 |
| 6 | -2.065840 | 3.374416  | 2.571851  |
| 6 | -1.913503 | 4.022280  | 1.280845  |
| 6 | -2.030594 | -4.081053 | -0.521470 |
| 6 | -1.893611 | -4.027392 | 0.922422  |
| 6 | -1.642246 | 3.891633  | -1.557735 |
| 6 | -1.523807 | 3.131836  | -2.788122 |
| 6 | -1.582958 | -2.540553 | 3.337970  |
| 6 | -1.416783 | -1.274616 | 4.025534  |
| 6 | -1.302518 | 0.633238  | -4.147135 |
| 6 | -1.198035 | -0.809083 | -4.105306 |
| 6 | -1.073721 | 1.556736  | 3.945192  |
| 6 | -0.908378 | 2.776825  | 3.187676  |
| 6 | -0.974546 | -3.227381 | -2.604394 |
| 6 | -0.853524 | -3.913666 | -1.341092 |
| 6 | -0.599508 | 4.124271  | 0.687425  |
| 6 | -0.463358 | 4.097357  | -0.747181 |
| 6 | -0.575671 | -3.884116 | 1.504881  |
| 6 | -0.421339 | -3.169365 | 2.743842  |
| 6 | -0.217692 | 2.664960  | -3.209873 |
| 6 | -0.107529 | 1.426065  | -3.931048 |
| 6 | -0.085429 | -0.715140 | 4.169790  |
| 6 | 0.085417  | 0.711284  | 4.170449  |
| 6 | 0.107526  | -1.422408 | -3.932367 |
| 6 | 0.217696  | -2.661969 | -3.212340 |
| 6 | 0.421338  | 3.166827  | 2.746776  |
| 6 | 0.575678  | 3.882725  | 1.508479  |
| 6 | 0.463368  | -4.096645 | -0.750977 |
| 6 | 0.599514  | -4.124892 | 0.683605  |
| 6 | 0.853534  | 3.914916  | -1.337464 |
| 6 | 0.974550  | 3.229805  | -2.601404 |
| 6 | 0.908371  | -2.779770 | 3.185109  |
| 6 | 1.073708  | -1.560384 | 3.943758  |
| 6 | 1.198029  | 0.812900  | -4.104564 |
| 6 | 1.302514  | -0.629383 | -4.147727 |
| 6 | 1.416773  | 1.270891  | 4.026717  |
| 6 | 1.582956  | 2.537462  | 3.340325  |
| 6 | 1.523814  | -3.129228 | -2.791018 |
| 6 | 1.642257  | -3.890161 | -1.561334 |
| 6 | 1.893622  | 4.026530  | 0.926155  |
| 6 | 2.030606  | 4.081531  | -0.517688 |
| 6 | 1.913504  | -4.023445 | 1.277123  |
| 6 | 2.065831  | -3.376789 | 2.568735  |
| 6 | 2.275721  | 2.793289  | -3.052605 |

|   |           |           |           |
|---|-----------|-----------|-----------|
| 6 | 2.386330  | 1.587482  | -3.852095 |
| 6 | 2.395541  | -1.014430 | 4.126978  |
| 6 | 2.565045  | 0.423926  | 4.207587  |
| 6 | 2.598649  | -1.248382 | -4.012818 |
| 6 | 2.706064  | -2.534722 | -3.357690 |
| 6 | 2.900949  | 2.946536  | 2.925138  |
| 6 | 3.057166  | 3.733878  | 1.724289  |
| 6 | 2.948502  | -4.092053 | -0.979859 |
| 6 | 3.081406  | -4.195491 | 0.451060  |
| 6 | 3.338789  | 3.916556  | -1.109200 |
| 6 | 3.460223  | 3.301069  | -2.404159 |
| 6 | 3.388265  | -3.001834 | 3.023040  |
| 6 | 3.551072  | -1.833042 | 3.837154  |
| 6 | 3.687897  | 0.980270  | -4.044741 |
| 6 | 3.792365  | -0.443925 | -4.162088 |
| 6 | 3.895515  | 0.985058  | 4.076857  |
| 6 | 4.063957  | 2.268235  | 3.467386  |
| 6 | 4.014815  | -3.010686 | -2.947684 |
| 6 | 4.133407  | -3.825036 | -1.777187 |
| 6 | 4.381828  | 3.891266  | 1.147954  |
| 6 | 4.521351  | 4.024191  | -0.270020 |
| 6 | 4.406903  | -4.114338 | 1.051120  |
| 6 | 4.563520  | -3.562207 | 2.370333  |
| 6 | 4.774056  | 2.881101  | -2.873946 |
| 6 | 4.892049  | 1.742003  | -3.746097 |
| 6 | 4.892539  | -1.303458 | 4.063992  |
| 6 | 5.061770  | 0.128081  | 4.232262  |
| 6 | 5.106960  | -1.071167 | -4.075664 |
| 6 | 5.213817  | -2.397756 | -3.493922 |
| 6 | 5.399284  | 2.709824  | 3.095283  |
| 6 | 5.558800  | 3.571024  | 1.935947  |
| 6 | 5.448979  | -4.076915 | -1.217358 |
| 6 | 5.571734  | -4.264855 | 0.216769  |
| 6 | 5.838665  | 3.913590  | -0.867126 |
| 6 | 5.953129  | 3.371825  | -2.208805 |
| 6 | 5.890245  | -3.269135 | 2.881201  |
| 6 | 6.041352  | -2.125065 | 3.815140  |
| 6 | 6.198683  | 1.177063  | -4.026924 |
| 6 | 6.291315  | -0.283457 | -4.258070 |
| 6 | 6.378962  | 0.703084  | 4.203670  |
| 6 | 6.548770  | 2.054985  | 3.654087  |
| 6 | 6.508805  | -2.927408 | -3.152527 |
| 6 | 6.626866  | -3.819503 | -1.998992 |
| 6 | 6.872369  | 3.800222  | 1.391233  |
| 6 | 7.014688  | 4.014409  | -0.045344 |
| 6 | 6.878707  | -4.242396 | 0.831513  |
| 6 | 7.007475  | -3.799051 | 2.176298  |
| 6 | 7.251791  | 2.994048  | -2.719144 |
| 6 | 7.346917  | 1.941367  | -3.666605 |
| 6 | 7.329123  | -1.568596 | 4.156492  |
| 6 | 7.491575  | -0.206675 | 4.360573  |
| 6 | 7.553997  | -0.989031 | -4.256175 |
| 6 | 7.658329  | -2.268424 | -3.738596 |
| 6 | 7.847806  | 2.600597  | 3.311255  |
| 6 | 8.002245  | 3.451954  | 2.234510  |
| 6 | 7.913683  | -4.157899 | -1.401204 |
| 6 | 8.036000  | -4.379256 | -0.048626 |
| 6 | 8.308910  | 3.967589  | -0.720267 |
| 6 | 8.424826  | 3.498189  | -2.007190 |
| 1 | -9.415451 | -3.369128 | -2.468954 |
| 1 | -9.213833 | -4.221531 | -0.157095 |
| 1 | -9.027037 | 4.529473  | 0.406168  |
| 1 | -8.814055 | 4.139125  | -2.025075 |
| 1 | -9.012305 | -3.760220 | 1.929849  |
| 1 | -8.738050 | -2.248630 | 3.844083  |
| 1 | -8.650607 | 2.731248  | -3.640580 |
| 1 | -8.466768 | 0.464328  | -4.559536 |
| 1 | -8.503905 | -0.199867 | 4.495465  |
| 1 | -8.217549 | 2.209375  | 4.137339  |
| 1 | -8.348665 | -1.570996 | -3.928514 |



|   |           |           |           |
|---|-----------|-----------|-----------|
| 1 | -8.021170 | 3.648655  | 2.575052  |
| 1 | 8.021085  | -3.651211 | 2.571776  |
| 1 | 8.348594  | 1.574787  | -3.927275 |
| 1 | 8.217516  | -2.213263 | 4.135482  |
| 1 | 8.503877  | 0.195659  | 4.495783  |
| 1 | 8.466751  | -0.460108 | -4.560137 |
| 1 | 8.650596  | -2.727840 | -3.643163 |
| 1 | 8.738058  | 2.244999  | 3.846167  |
| 1 | 9.012336  | 3.758312  | 1.933300  |
| 1 | 8.814078  | -4.137195 | -2.028844 |
| 1 | 9.027024  | -4.529877 | 0.402015  |
| 1 | 9.213862  | 4.221555  | -0.153209 |
| 1 | 9.415463  | 3.371398  | -2.465881 |

Nanotube (7,5) u06v10  
B3LYP/STO-3G Energy: -6188.167752

|   |           |           |           |
|---|-----------|-----------|-----------|
| 6 | -8.502888 | -3.007838 | -2.749318 |
| 6 | -8.354518 | -3.788767 | -1.628181 |
| 6 | -8.219085 | 4.103244  | 1.158160  |
| 6 | -8.116172 | 4.239459  | -0.206785 |
| 6 | -8.000544 | -4.045181 | 1.354550  |
| 6 | -7.841079 | -3.496611 | 2.611537  |
| 6 | -7.867775 | 3.022478  | -2.955047 |
| 6 | -7.750238 | 1.922490  | -3.785639 |
| 6 | -7.517937 | -1.046384 | 4.341887  |
| 6 | -7.385205 | 0.324974  | 4.492636  |
| 6 | -7.482419 | -1.056101 | -3.969461 |
| 6 | -7.351877 | -2.312552 | -3.324667 |
| 6 | -7.140971 | 2.995856  | 3.147034  |
| 6 | -7.043919 | 3.770472  | 1.959981  |
| 6 | -7.046369 | -3.979423 | -1.005823 |
| 6 | -6.880307 | -4.138583 | 0.433829  |
| 6 | -6.833251 | 4.094037  | -0.887195 |
| 6 | -6.719292 | 3.532339  | -2.231697 |
| 6 | -6.545262 | -3.027368 | 3.065100  |
| 6 | -6.390739 | -1.859918 | 3.941086  |
| 6 | -6.474905 | 1.267262  | -3.983824 |
| 6 | -6.353117 | -0.200131 | -4.137397 |
| 6 | -6.113897 | 0.980218  | 4.288941  |
| 6 | -6.000987 | 2.327848  | 3.679348  |
| 6 | -6.037075 | -2.781877 | -2.947217 |
| 6 | -5.887870 | -3.646913 | -1.791488 |
| 6 | -5.747991 | 3.979881  | 1.355894  |
| 6 | -5.646597 | 4.168725  | -0.079687 |
| 6 | -5.560459 | -4.028482 | 1.001283  |
| 6 | -5.394475 | -3.490771 | 2.341013  |
| 6 | -5.421139 | 3.136677  | -2.714283 |
| 6 | -5.301448 | 2.006987  | -3.619927 |
| 6 | -5.084194 | -1.281754 | 4.100310  |
| 6 | -4.945362 | 0.148614  | 4.304909  |
| 6 | -5.032850 | -0.790542 | -4.029730 |
| 6 | -4.879685 | -2.113036 | -3.481279 |
| 6 | -4.689682 | 2.773044  | 3.245728  |
| 6 | -4.566638 | 3.647896  | 2.109879  |
| 6 | -4.558290 | -3.878769 | -1.261381 |
| 6 | -4.393759 | -4.109514 | 0.141463  |
| 6 | -4.337043 | 4.097274  | -0.701256 |
| 6 | -4.224233 | 3.612991  | -2.042799 |
| 6 | -4.061211 | -3.128355 | 2.795156  |
| 6 | -3.905540 | -2.042046 | 3.712604  |
| 6 | -3.978336 | 1.450830  | -3.880599 |
| 6 | -3.847467 | 0.047967  | -4.136650 |
| 6 | -3.619092 | 0.749266  | 4.205546  |
| 6 | -3.493019 | 2.090874  | 3.718390  |
| 6 | -3.550573 | -2.611614 | -3.153252 |
| 6 | -3.394086 | -3.534283 | -2.061865 |
| 6 | -3.253562 | 3.908844  | 1.534272  |

|   |           |           |           |
|---|-----------|-----------|-----------|
| 6 | -3.143219 | 4.176303  | 0.124049  |
| 6 | -3.060812 | -4.073296 | 0.720253  |
| 6 | -2.895887 | -3.616062 | 2.078876  |
| 6 | -2.913786 | 3.285290  | -2.576614 |
| 6 | -2.795300 | 2.214768  | -3.542233 |
| 6 | -2.583169 | -1.502374 | 3.965430  |
| 6 | -2.442419 | -0.090484 | 4.258975  |
| 6 | -2.531959 | -0.560995 | -4.125111 |
| 6 | -2.386416 | -1.929369 | -3.667046 |
| 6 | -2.185539 | 2.600636  | 3.360225  |
| 6 | -2.067882 | 3.558371  | 2.276100  |
| 6 | -2.071436 | -3.817681 | -1.551073 |
| 6 | -1.907093 | -4.127624 | -0.143306 |
| 6 | -1.843030 | 4.158225  | -0.505430 |
| 6 | -1.732299 | 3.739480  | -1.890287 |
| 6 | -1.577118 | -3.296196 | 2.566493  |
| 6 | -1.421898 | -2.246813 | 3.555085  |
| 6 | -1.491501 | 1.679377  | -3.849245 |
| 6 | -1.361918 | 0.277410  | -4.184075 |
| 6 | -1.134571 | 0.515028  | 4.209279  |
| 6 | -1.006344 | 1.893038  | 3.790400  |
| 6 | -1.070833 | -2.440974 | -3.363763 |
| 6 | -0.914130 | -3.424968 | -2.319323 |
| 6 | -0.766775 | 3.837995  | 1.713071  |
| 6 | -0.655012 | 4.177533  | 0.316292  |
| 6 | -0.581272 | -4.106273 | 0.436807  |
| 6 | -0.416180 | -3.724008 | 1.814666  |
| 6 | -0.426066 | 3.422895  | -2.432506 |
| 6 | -0.306880 | 2.413498  | -3.449190 |
| 6 | -0.100001 | -1.712648 | 3.821423  |
| 6 | 0.043934  | -0.332078 | 4.192740  |
| 6 | -0.043933 | -0.332297 | -4.192724 |
| 6 | 0.100002  | -1.712849 | -3.821335 |
| 6 | 0.306880  | 2.413680  | 3.449065  |
| 6 | 0.426065  | 3.423024  | 2.432328  |
| 6 | 0.416180  | -3.724105 | -1.814473 |
| 6 | 0.581272  | -4.106297 | -0.436595 |
| 6 | 0.655011  | 4.177517  | -0.316509 |
| 6 | 0.766774  | 3.837905  | -1.713271 |
| 6 | 0.914130  | -3.424845 | 2.319499  |
| 6 | 1.070834  | -2.440797 | 3.363888  |
| 6 | 1.006344  | 1.892839  | -3.790497 |
| 6 | 1.134572  | 0.514807  | -4.209305 |
| 6 | 1.361919  | 0.277629  | 4.184060  |
| 6 | 1.491501  | 1.679580  | 3.849158  |
| 6 | 1.421899  | -2.247001 | -3.554969 |
| 6 | 1.577118  | -3.296332 | -2.566323 |
| 6 | 1.732298  | 3.739582  | 1.890092  |
| 6 | 1.843029  | 4.158254  | 0.505214  |
| 6 | 1.907092  | -4.127617 | 0.143520  |
| 6 | 2.071436  | -3.817600 | 1.551271  |
| 6 | 2.067881  | 3.558252  | -2.276284 |
| 6 | 2.185539  | 2.600459  | -3.360358 |
| 6 | 2.386416  | -1.929176 | 3.667143  |
| 6 | 2.531960  | -0.560778 | 4.125137  |
| 6 | 2.442420  | -0.090707 | -4.258968 |
| 6 | 2.583170  | -1.502582 | -3.965351 |
| 6 | 2.795300  | 2.214955  | 3.542117  |
| 6 | 2.913785  | 3.285428  | 2.576443  |
| 6 | 2.895886  | -3.616174 | -2.078689 |
| 6 | 3.060811  | -4.073336 | -0.720042 |
| 6 | 3.143218  | 4.176300  | -0.124267 |
| 6 | 3.253562  | 3.908765  | -1.534475 |
| 6 | 3.394086  | -3.534175 | 2.062047  |
| 6 | 3.550573  | -2.611448 | 3.153385  |
| 6 | 3.493020  | 2.090678  | -3.718495 |
| 6 | 3.619093  | 0.749045  | -4.205581 |
| 6 | 3.847468  | 0.048185  | 4.136644  |
| 6 | 3.978336  | 1.451034  | 3.880521  |
| 6 | 3.905540  | -2.042241 | -3.712497 |

|   |           |           |           |
|---|-----------|-----------|-----------|
| 6 | 4.061211  | -3.128504 | -2.794994 |
| 6 | 4.224232  | 3.613102  | 2.042610  |
| 6 | 4.337041  | 4.097316  | 0.701043  |
| 6 | 4.393759  | -4.109525 | -0.141250 |
| 6 | 4.558289  | -3.878705 | 1.261582  |
| 6 | 4.566638  | 3.647787  | -2.110067 |
| 6 | 4.689682  | 2.772874  | -3.245868 |
| 6 | 4.879686  | -2.112853 | 3.481385  |
| 6 | 5.032851  | -0.790330 | 4.029766  |
| 6 | 4.945363  | 0.148388  | -4.304912 |
| 6 | 5.084195  | -1.281969 | -4.100240 |
| 6 | 5.301448  | 2.007178  | 3.619819  |
| 6 | 5.421138  | 3.136822  | 2.714118  |
| 6 | 5.394475  | -3.490898 | -2.340832 |
| 6 | 5.560458  | -4.028540 | -1.001074 |
| 6 | 5.646595  | 4.168735  | 0.079470  |
| 6 | 5.747991  | 3.979813  | -1.356100 |
| 6 | 5.887870  | -3.646821 | 1.791677  |
| 6 | 6.037075  | -2.781722 | 2.947358  |
| 6 | 6.000988  | 2.327652  | -3.679460 |
| 6 | 6.113898  | 0.979991  | -4.288982 |
| 6 | 6.353117  | -0.199913 | 4.137399  |
| 6 | 6.474905  | 1.267472  | 3.983751  |
| 6 | 6.390740  | -1.860124 | -3.940984 |
| 6 | 6.545262  | -3.027530 | -3.064942 |
| 6 | 6.719291  | 3.532460  | 2.231512  |
| 6 | 6.833249  | 4.094090  | 0.886983  |
| 6 | 6.880306  | -4.138611 | -0.433615 |
| 6 | 7.046368  | -3.979375 | 1.006029  |
| 6 | 7.043920  | 3.770368  | -1.960173 |
| 6 | 7.140974  | 2.995682  | -3.147179 |
| 6 | 7.351878  | -2.312376 | 3.324781  |
| 6 | 7.482421  | -1.055891 | 3.969504  |
| 6 | 7.385207  | 0.324739  | -4.492636 |
| 6 | 7.517939  | -1.046610 | -4.341820 |
| 6 | 7.750238  | 1.922688  | 3.785529  |
| 6 | 7.867775  | 3.022635  | 2.954884  |
| 6 | 7.841079  | -3.496751 | -2.611354 |
| 6 | 8.000543  | -4.045259 | -1.354341 |
| 6 | 8.116170  | 4.239478  | 0.206566  |
| 6 | 8.219085  | 4.103188  | -1.158371 |
| 6 | 8.354517  | -3.788685 | 1.628376  |
| 6 | 8.502888  | -3.007694 | 2.749470  |
| 1 | -9.503673 | -2.789347 | -3.146853 |
| 1 | -9.243606 | -4.199678 | -1.132648 |
| 1 | -9.204349 | 4.111479  | 1.644495  |
| 1 | -9.026235 | 4.361486  | -0.808270 |
| 1 | -9.009944 | -4.287769 | 0.998716  |
| 1 | -8.726542 | -3.311862 | 3.233393  |
| 1 | -8.865373 | 3.423081  | -2.734351 |
| 1 | -8.657980 | 1.471478  | -4.207044 |
| 1 | -8.519050 | -1.494156 | 4.384330  |
| 1 | -8.285277 | 0.932970  | 4.651311  |
| 1 | -8.494053 | -0.655871 | -4.114997 |
| 1 | -8.143835 | 2.729039  | 3.504397  |
| 1 | 8.143835  | 2.728838  | -3.504519 |
| 1 | 8.494057  | -0.655648 | 4.115013  |
| 1 | 8.285279  | 0.932729  | -4.651334 |
| 1 | 8.519054  | -1.494383 | -4.384235 |
| 1 | 8.657981  | 1.471696  | 4.206955  |
| 1 | 8.865372  | 3.423226  | 2.734167  |
| 1 | 8.726542  | -3.312034 | -3.233219 |
| 1 | 9.009943  | -4.287830 | -0.998495 |
| 1 | 9.026233  | 4.361539  | 0.808046  |
| 1 | 9.204347  | 4.111401  | -1.644706 |
| 1 | 9.243605  | -4.199624 | 1.132865  |
| 1 | 9.503673  | -2.789181 | 3.146992  |

Nanotube (7,5) u06v11  
B3LYP/STO-3G Energy: -6263.462678

|   |           |           |           |
|---|-----------|-----------|-----------|
| 6 | -8.581341 | -2.089801 | -3.547894 |
| 6 | -8.466972 | -3.133832 | -2.661945 |
| 6 | -8.302706 | 3.772283  | 2.052083  |
| 6 | -8.167592 | 4.252324  | 0.770551  |
| 6 | -8.179695 | -4.153053 | 0.161205  |
| 6 | -8.040135 | -3.948057 | 1.518956  |
| 6 | -7.869708 | 3.779214  | -2.193285 |
| 6 | -7.745775 | 2.927422  | -3.275418 |
| 6 | -7.725527 | -2.029899 | 3.825817  |
| 6 | -7.581095 | -0.745824 | 4.324965  |
| 6 | -7.510108 | 0.090671  | -4.208818 |
| 6 | -7.409347 | -1.290136 | -3.905184 |
| 6 | -7.280344 | 2.175383  | 3.710169  |
| 6 | -7.149042 | 3.225890  | 2.764259  |
| 6 | -7.174652 | -3.500401 | -2.085905 |
| 6 | -7.041115 | -4.025624 | -0.733606 |
| 6 | -6.870707 | 4.265498  | 0.099847  |
| 6 | -6.732037 | 4.065871  | -1.340098 |
| 6 | -6.748164 | -3.631684 | 2.100176  |
| 6 | -6.598622 | -2.731260 | 3.248051  |
| 6 | -6.473504 | 2.321696  | -3.609550 |
| 6 | -6.366082 | 0.941697  | -4.131223 |
| 6 | -6.298017 | -0.080093 | 4.317449  |
| 6 | -6.158113 | 1.375792  | 4.075931  |
| 6 | -6.108579 | -1.864048 | -3.637945 |
| 6 | -5.995179 | -2.998709 | -2.740731 |
| 6 | -5.837340 | 3.564073  | 2.259485  |
| 6 | -5.701598 | 4.112818  | 0.922691  |
| 6 | -5.731993 | -4.088047 | -0.133938 |
| 6 | -5.587682 | -3.913971 | 1.301548  |
| 6 | -5.427321 | 3.785602  | -1.883298 |
| 6 | -5.299793 | 2.923442  | -3.045862 |
| 6 | -5.289209 | -2.234439 | 3.573199  |
| 6 | -5.139151 | -0.906494 | 4.140658  |
| 6 | -5.056029 | 0.320367  | -4.154913 |
| 6 | -4.931613 | -1.101484 | -3.962322 |
| 6 | -4.833707 | 1.897381  | 3.796669  |
| 6 | -4.676868 | 3.032622  | 2.925937  |
| 6 | -4.680647 | -3.382693 | -2.265302 |
| 6 | -4.548830 | -3.967108 | -0.965349 |
| 6 | -4.379670 | 4.182186  | 0.328838  |
| 6 | -4.241278 | 4.054060  | -1.089483 |
| 6 | -4.260497 | -3.701109 | 1.856099  |
| 6 | -4.111534 | -2.887963 | 3.023096  |
| 6 | -3.978175 | 2.428872  | -3.413848 |
| 6 | -3.858507 | 1.136938  | -4.019151 |
| 6 | -3.805005 | -0.321293 | 4.221280  |
| 6 | -3.654531 | 1.097535  | 4.098970  |
| 6 | -3.616646 | -1.691057 | -3.749862 |
| 6 | -3.495414 | -2.865117 | -2.930443 |
| 6 | -3.348821 | 3.412176  | 2.461527  |
| 6 | -3.204000 | 4.028732  | 1.170119  |
| 6 | -3.227912 | -4.102172 | -0.373242 |
| 6 | -3.085716 | -4.008534 | 1.058454  |
| 6 | -2.922175 | 3.849699  | -1.663459 |
| 6 | -2.793589 | 3.059207  | -2.866297 |
| 6 | -2.787916 | -2.451271 | 3.427600  |
| 6 | -2.637786 | -1.165470 | 4.076352  |
| 6 | -2.550585 | 0.521945  | -4.139398 |
| 6 | -2.432272 | -0.919439 | -4.049274 |
| 6 | -2.333698 | 1.662327  | 3.908980  |
| 6 | -2.182612 | 2.865257  | 3.112177  |
| 6 | -2.187170 | -3.294239 | -2.486880 |
| 6 | -2.056493 | -3.955574 | -1.203023 |
| 6 | -1.889447 | 4.152374  | 0.582035  |
| 6 | -1.751025 | 4.096063  | -0.860891 |
| 6 | -1.773145 | -3.845215 | 1.634190  |

|   |           |           |           |
|---|-----------|-----------|-----------|
| 6 | -1.626492 | -3.084631 | 2.860274  |
| 6 | -1.488761 | 2.596893  | -3.274294 |
| 6 | -1.368607 | 1.326308  | -3.956971 |
| 6 | -1.322949 | -0.588413 | 4.207892  |
| 6 | -1.171536 | 0.849469  | 4.163150  |
| 6 | -1.130136 | -1.516259 | -3.866931 |
| 6 | -1.008912 | -2.739700 | -3.109659 |
| 6 | -0.867518 | 3.261874  | 2.666405  |
| 6 | -0.720894 | 3.946189  | 1.405000  |
| 6 | -0.743396 | -4.106048 | -0.614129 |
| 6 | -0.602546 | -4.087365 | 0.818686  |
| 6 | -0.436700 | 3.904843  | -1.439181 |
| 6 | -0.305621 | 3.182492  | -2.676026 |
| 6 | -0.304898 | -2.656593 | 3.276015  |
| 6 | -0.153543 | -1.420299 | 3.992053  |
| 6 | -0.059305 | 0.716040  | -4.097924 |
| 6 | 0.059304  | -0.716074 | -4.097918 |
| 6 | 0.153543  | 1.420331  | 3.992041  |
| 6 | 0.304898  | 2.656619  | 3.275993  |
| 6 | 0.305621  | -3.182514 | -2.676000 |
| 6 | 0.436699  | -3.904855 | -1.439149 |
| 6 | 0.602546  | 4.087372  | 0.818653  |
| 6 | 0.743395  | 4.106043  | -0.614162 |
| 6 | 0.720894  | -3.946178 | 1.405032  |
| 6 | 0.867518  | -3.261853 | 2.666431  |
| 6 | 1.008912  | 2.739675  | -3.109682 |
| 6 | 1.130136  | 1.516227  | -3.866943 |
| 6 | 1.171537  | -0.849435 | 4.163157  |
| 6 | 1.322949  | 0.588447  | 4.207887  |
| 6 | 1.368607  | -1.326341 | -3.956960 |
| 6 | 1.488761  | -2.596919 | -3.274273 |
| 6 | 1.626492  | 3.084654  | 2.860249  |
| 6 | 1.773145  | 3.845228  | 1.634159  |
| 6 | 1.751025  | -4.096071 | -0.860858 |
| 6 | 1.889447  | -4.152370 | 0.582069  |
| 6 | 2.056493  | 3.955564  | -1.203055 |
| 6 | 2.187170  | 3.294219  | -2.486908 |
| 6 | 2.182613  | -2.865232 | 3.112200  |
| 6 | 2.333699  | -1.662295 | 3.908994  |
| 6 | 2.432272  | 0.919406  | -4.049282 |
| 6 | 2.550585  | -0.521979 | -4.139394 |
| 6 | 2.637787  | 1.165503  | 4.076343  |
| 6 | 2.787916  | 2.451300  | 3.427580  |
| 6 | 2.793589  | -3.059231 | -2.866273 |
| 6 | 2.922174  | -3.849714 | -1.663428 |
| 6 | 3.085716  | 4.008542  | 1.058421  |
| 6 | 3.227912  | 4.102169  | -0.373276 |
| 6 | 3.204000  | -4.028723 | 1.170152  |
| 6 | 3.348821  | -3.412156 | 2.461555  |
| 6 | 3.495414  | 2.865093  | -2.930467 |
| 6 | 3.616646  | 1.691026  | -3.749876 |
| 6 | 3.654531  | -1.097501 | 4.098978  |
| 6 | 3.805005  | 0.321328  | 4.221277  |
| 6 | 3.858507  | -1.136970 | -4.019142 |
| 6 | 3.978175  | -2.428901 | -3.413829 |
| 6 | 4.111533  | 2.887988  | 3.023072  |
| 6 | 4.260496  | 3.701124  | 1.856069  |
| 6 | 4.241277  | -4.054070 | -1.089450 |
| 6 | 4.379670  | -4.182183 | 0.328872  |
| 6 | 4.548830  | 3.967099  | -0.965382 |
| 6 | 4.680646  | 3.382674  | -2.265330 |
| 6 | 4.676868  | -3.032597 | 2.925960  |
| 6 | 4.833708  | -1.897349 | 3.796682  |
| 6 | 4.931613  | 1.101452  | -3.962331 |
| 6 | 5.056029  | -0.320401 | -4.154909 |
| 6 | 5.139152  | 0.906528  | 4.140650  |
| 6 | 5.289209  | 2.234468  | 3.573180  |
| 6 | 5.299792  | -2.923467 | -3.045838 |
| 6 | 5.427320  | -3.785618 | -1.883268 |
| 6 | 5.587682  | 3.913981  | 1.301516  |

|   |           |           |           |
|---|-----------|-----------|-----------|
| 6 | 5.731993  | 4.088046  | -0.133971 |
| 6 | 5.701598  | -4.112811 | 0.922724  |
| 6 | 5.837341  | -3.564055 | 2.259512  |
| 6 | 5.995179  | 2.998687  | -2.740755 |
| 6 | 6.108579  | 1.864018  | -3.637959 |
| 6 | 6.158114  | -1.375758 | 4.075940  |
| 6 | 6.298018  | 0.080129  | 4.317448  |
| 6 | 6.366082  | -0.941731 | -4.131214 |
| 6 | 6.473504  | -2.321726 | -3.609530 |
| 6 | 6.598622  | 2.731287  | 3.248029  |
| 6 | 6.748164  | 3.631702  | 2.100146  |
| 6 | 6.732036  | -4.065884 | -1.340067 |
| 6 | 6.870706  | -4.265500 | 0.099881  |
| 6 | 7.041115  | 4.025619  | -0.733639 |
| 6 | 7.174652  | 3.500385  | -2.085934 |
| 6 | 7.149043  | -3.225867 | 2.764284  |
| 6 | 7.280345  | -2.175351 | 3.710183  |
| 6 | 7.409347  | 1.290104  | -3.905193 |
| 6 | 7.510109  | -0.090706 | -4.208812 |
| 6 | 7.581095  | 0.745860  | 4.324960  |
| 6 | 7.725526  | 2.029932  | 3.825801  |
| 6 | 7.745774  | -2.927448 | -3.275394 |
| 6 | 7.869707  | -3.779232 | -2.193254 |
| 6 | 8.040134  | 3.948071  | 1.518923  |
| 6 | 8.179694  | 4.153055  | 0.161171  |
| 6 | 8.167592  | -4.252319 | 0.770585  |
| 6 | 8.302706  | -3.772267 | 2.052112  |
| 6 | 8.466972  | 3.133810  | -2.661970 |
| 6 | 8.581341  | 2.089771  | -3.547909 |
| 1 | -9.570458 | -1.759542 | -3.894450 |
| 1 | -9.371480 | -3.642702 | -2.304413 |
| 1 | -9.298485 | 3.671785  | 2.505824  |
| 1 | -9.062285 | 4.539969  | 0.203384  |
| 1 | -9.184033 | -4.280441 | -0.262554 |
| 1 | -8.935900 | -3.915443 | 2.152547  |
| 1 | -8.867057 | 4.128835  | -1.897450 |
| 1 | -8.648207 | 2.616636  | -3.817665 |
| 1 | -8.731784 | -2.458902 | 3.736308  |
| 1 | -8.477071 | -0.184749 | 4.620628  |
| 1 | -8.512939 | 0.532800  | -4.266130 |
| 1 | -8.293328 | 1.841151  | 3.968643  |
| 1 | 8.293331  | -1.841115 | 3.968651  |
| 1 | 8.512939  | -0.532836 | -4.266124 |
| 1 | 8.477071  | 0.184787  | 4.620626  |
| 1 | 8.731782  | 2.458933  | 3.736286  |
| 1 | 8.648207  | -2.616664 | -3.817640 |
| 1 | 8.867056  | -4.128848 | -1.897415 |
| 1 | 8.935899  | 3.915462  | 2.152514  |
| 1 | 9.184032  | 4.280441  | -0.262589 |
| 1 | 9.062284  | -4.539969 | 0.203420  |
| 1 | 9.298484  | -3.671765 | 2.505852  |
| 1 | 9.371480  | 3.642682  | -2.304440 |
| 1 | 9.570459  | 1.759508  | -3.894459 |

Nanotube (7,5) u07v00  
B3LYP/STO-3G Energy: -6338.757242

|   |          |           |           |
|---|----------|-----------|-----------|
| 6 | 8.752373 | -1.186095 | 3.830570  |
| 6 | 8.613131 | -2.420270 | 3.243973  |
| 6 | 8.383098 | 3.045242  | -3.081930 |
| 6 | 8.280362 | 3.838621  | -1.963863 |
| 6 | 8.257736 | -4.123537 | 0.780470  |
| 6 | 8.088191 | -4.271527 | -0.580740 |
| 6 | 8.045589 | 4.144660  | 1.028123  |
| 6 | 7.939863 | 3.600899  | 2.294428  |
| 6 | 7.729412 | -3.008331 | -3.296847 |
| 6 | 7.580302 | -1.894559 | -4.105757 |
| 6 | 7.707726 | 1.102304  | 3.929273  |

|   |          |           |           |
|---|----------|-----------|-----------|
| 6 | 7.592507 | -0.307857 | 3.992435  |
| 6 | 7.312303 | 1.089361  | -4.253341 |
| 6 | 7.209669 | 2.347992  | -3.606551 |
| 6 | 7.306072 | -2.907748 | 2.805629  |
| 6 | 7.139886 | -3.759205 | 1.636811  |
| 6 | 6.998709 | 4.038835  | -1.292521 |
| 6 | 6.890798 | 4.216273  | 0.151867  |
| 6 | 6.784068 | -4.101116 | -1.196885 |
| 6 | 6.612240 | -3.524370 | -2.532944 |
| 6 | 6.670764 | 3.115598  | 2.797680  |
| 6 | 6.566193 | 1.918062  | 3.657699  |
| 6 | 6.301027 | -1.233569 | -4.241038 |
| 6 | 6.175865 | 0.235967  | -4.378517 |
| 6 | 6.282546 | -0.917045 | 3.907534  |
| 6 | 6.143557 | -2.242646 | 3.334591  |
| 6 | 5.911670 | 2.821071  | -3.179492 |
| 6 | 5.810007 | 3.695835  | -2.026107 |
| 6 | 5.816921 | -3.960907 | 1.100620  |
| 6 | 5.640666 | -4.158729 | -0.328300 |
| 6 | 5.596343 | 4.101321  | 0.774764  |
| 6 | 5.488677 | 3.567159  | 2.121879  |
| 6 | 5.297884 | -3.113293 | -2.947260 |
| 6 | 5.141719 | -1.973556 | -3.833408 |
| 6 | 5.253729 | 1.338358  | 3.866007  |
| 6 | 5.117248 | -0.084141 | 4.047981  |
| 6 | 4.861871 | 0.827858  | -4.215831 |
| 6 | 4.732811 | 2.151119  | -3.663682 |
| 6 | 4.817458 | -2.722137 | 3.000903  |
| 6 | 4.653963 | -3.619483 | 1.897655  |
| 6 | 4.502749 | 3.932216  | -1.443967 |
| 6 | 4.395209 | 4.172591  | -0.037504 |
| 6 | 4.302661 | -4.080983 | -0.890893 |
| 6 | 4.130407 | -3.590683 | -2.223191 |
| 6 | 4.172788 | 3.197791  | 2.629510  |
| 6 | 4.058238 | 2.105514  | 3.547100  |
| 6 | 3.809910 | -1.412465 | -4.031688 |
| 6 | 3.671024 | -0.008667 | -4.275564 |
| 6 | 3.794728 | -0.694077 | 4.019119  |
| 6 | 3.649514 | -2.037523 | 3.533428  |
| 6 | 3.418610 | 2.653734  | -3.285560 |
| 6 | 3.307376 | 3.582842  | -2.194407 |
| 6 | 3.319254 | -3.888475 | 1.387266  |
| 6 | 3.144900 | -4.162207 | -0.016113 |
| 6 | 3.087581 | 4.137123  | 0.595695  |
| 6 | 2.979791 | 3.680966  | 1.961300  |
| 6 | 2.799303 | -3.255557 | -2.696743 |
| 6 | 2.640797 | -2.177184 | -3.647757 |
| 6 | 2.748801 | 1.556004  | 3.845638  |
| 6 | 2.620339 | 0.142056  | 4.131932  |
| 6 | 2.357981 | 0.602229  | -4.209060 |
| 6 | 2.233298 | 1.971256  | -3.749195 |
| 6 | 2.329141 | -2.553464 | 3.242659  |
| 6 | 2.166868 | -3.522768 | 2.176830  |
| 6 | 2.006825 | 3.870815  | -1.631905 |
| 6 | 1.900142 | 4.186416  | -0.220655 |
| 6 | 1.819588 | -4.138873 | -0.586957 |
| 6 | 1.647597 | -3.712252 | -1.962149 |
| 6 | 1.680956 | 3.353303  | 2.499191  |
| 6 | 1.567782 | 2.299907  | 3.485855  |
| 6 | 1.325961 | -1.637314 | -3.893843 |
| 6 | 1.184450 | -0.234621 | -4.218846 |
| 6 | 1.311645 | -0.467448 | 4.135432  |
| 6 | 1.167805 | -1.844598 | 3.723979  |
| 6 | 0.931543 | 2.487312  | -3.396050 |
| 6 | 0.818757 | 3.476664  | -2.351646 |
| 6 | 0.841239 | -3.808271 | 1.674790  |
| 6 | 0.667825 | -4.155985 | 0.287737  |
| 6 | 0.598225 | 4.165467  | 0.412887  |
| 6 | 0.489411 | 3.781218  | 1.794888  |
| 6 | 0.319313 | -3.388565 | -2.443197 |

|   |           |           |           |
|---|-----------|-----------|-----------|
| 6 | 0.157757  | -2.371336 | -3.445595 |
| 6 | 0.258481  | 1.760057  | 3.802157  |
| 6 | 0.131647  | 0.377848  | 4.172803  |
| 6 | -0.131660 | 0.377351  | -4.172846 |
| 6 | -0.258490 | 1.759603  | -3.802359 |
| 6 | -0.157762 | -2.370924 | 3.445870  |
| 6 | -0.319310 | -3.388273 | 2.443593  |
| 6 | -0.489402 | 3.781004  | -1.795330 |
| 6 | -0.598212 | 4.165423  | -0.413376 |
| 6 | -0.667813 | -4.156027 | -0.287248 |
| 6 | -0.841231 | -3.808480 | -1.674342 |
| 6 | -0.818753 | 3.476954  | 2.351238  |
| 6 | -0.931548 | 2.487722  | 3.395755  |
| 6 | -1.167813 | -1.845044 | -3.723756 |
| 6 | -1.311658 | -0.467941 | -4.135363 |
| 6 | -1.184465 | -0.234118 | 4.218858  |
| 6 | -1.325972 | -1.636850 | 3.894020  |
| 6 | -1.567787 | 2.299492  | -3.486111 |
| 6 | -1.680952 | 3.353010  | -2.499578 |
| 6 | -1.647590 | -3.712030 | 1.962582  |
| 6 | -1.819576 | -4.138823 | 0.587443  |
| 6 | -1.900129 | 4.186465  | 0.220163  |
| 6 | -2.006817 | 3.871031  | 1.631449  |
| 6 | -2.166863 | -3.523045 | -2.176414 |
| 6 | -2.329144 | -2.553859 | -3.242350 |
| 6 | -2.233306 | 1.971706  | 3.748945  |
| 6 | -2.357996 | 0.602730  | 4.208960  |
| 6 | -2.620350 | 0.141562  | -4.131919 |
| 6 | -2.748809 | 1.555545  | -3.845794 |
| 6 | -2.640806 | -2.176752 | 3.647991  |
| 6 | -2.799302 | -3.255249 | 2.697115  |
| 6 | -2.979783 | 3.680752  | -1.961729 |
| 6 | -3.087568 | 4.137085  | -0.596183 |
| 6 | -3.144887 | -4.162241 | 0.016602  |
| 6 | -3.319244 | -3.888673 | -1.386809 |
| 6 | -3.307372 | 3.583129  | 2.193979  |
| 6 | -3.418615 | 2.654136  | 3.285228  |
| 6 | -3.649520 | -2.037951 | -3.533165 |
| 6 | -3.794738 | -0.694558 | -4.018999 |
| 6 | -3.671039 | -0.008158 | 4.275519  |
| 6 | -3.809924 | -1.411986 | 4.031814  |
| 6 | -4.058243 | 2.105095  | -3.547317 |
| 6 | -4.172783 | 3.197496  | -2.629873 |
| 6 | -4.130403 | -3.590447 | 2.223604  |
| 6 | -4.302649 | -4.080922 | 0.891371  |
| 6 | -4.395197 | 4.172645  | 0.037009  |
| 6 | -4.502741 | 3.932432  | 1.443499  |
| 6 | -4.653956 | -3.619746 | -1.897226 |
| 6 | -4.817459 | -2.722513 | -3.000565 |
| 6 | -4.732819 | 2.151563  | 3.663393  |
| 6 | -4.861885 | 0.828360  | 4.215680  |
| 6 | -5.117258 | -0.084624 | -4.047917 |
| 6 | -5.253736 | 1.337899  | -3.866116 |
| 6 | -5.141732 | -1.973103 | 3.833596  |
| 6 | -5.297886 | -3.112964 | 2.947605  |
| 6 | -5.488669 | 3.566942  | -2.122294 |
| 6 | -5.596331 | 4.101287  | -0.775251 |
| 6 | -5.640653 | -4.158755 | 0.328787  |
| 6 | -5.816910 | -3.961097 | -1.100156 |
| 6 | -5.810001 | 3.696121  | 2.025660  |
| 6 | -5.911673 | 2.821472  | 3.179131  |
| 6 | -6.143561 | -2.243056 | -3.334291 |
| 6 | -6.282555 | -0.917512 | -3.907366 |
| 6 | -6.175881 | 0.236492  | 4.378432  |
| 6 | -6.301046 | -1.233064 | 4.241122  |
| 6 | -6.566197 | 1.917633  | -3.657877 |
| 6 | -6.670760 | 3.115295  | -2.798030 |
| 6 | -6.612238 | -3.524112 | 2.533342  |
| 6 | -6.784056 | -4.101047 | 1.197363  |
| 6 | -6.890785 | 4.216332  | -0.152371 |



|   |           |           |           |
|---|-----------|-----------|-----------|
| 6 | -6.998700 | 4.039056  | 1.292036  |
| 6 | -7.139877 | -3.759462 | -1.636366 |
| 6 | -7.306072 | -2.908111 | -2.805260 |
| 6 | -7.209674 | 2.348446  | 3.606242  |
| 6 | -7.312310 | 1.089890  | 4.253181  |
| 6 | -7.592515 | -0.308332 | -3.992322 |
| 6 | -7.707732 | 1.101839  | -3.929333 |
| 6 | -7.580317 | -1.894082 | 4.105920  |
| 6 | -7.729415 | -3.007971 | 3.297166  |
| 6 | -7.939855 | 3.600686  | -2.294850 |
| 6 | -8.045576 | 4.144624  | -1.028621 |
| 6 | -8.088177 | -4.271564 | 0.581238  |
| 6 | -8.257723 | -4.123726 | -0.779988 |
| 6 | -8.280355 | 3.838919  | 1.963397  |
| 6 | -8.383098 | 3.045653  | 3.081545  |
| 6 | -8.613134 | -2.420671 | -3.243635 |
| 6 | -8.752381 | -1.186551 | -3.830347 |
| 1 | 9.750324  | -0.789314 | 4.063333  |
| 1 | 9.506531  | -3.014528 | 3.012372  |
| 1 | 9.367406  | 2.820337  | -3.515571 |
| 1 | 9.189402  | 4.251565  | -1.507755 |
| 1 | 9.270709  | -4.149368 | 1.202143  |
| 1 | 8.969111  | -4.412533 | -1.220269 |
| 1 | 9.038249  | 4.396059  | 0.633099  |
| 1 | 8.851566  | 3.430220  | 2.881508  |
| 1 | 8.734778  | -3.412997 | -3.123021 |
| 1 | 8.471560  | -1.439441 | -4.556902 |
| 1 | 8.713781  | 1.533806  | 3.852242  |
| 1 | 8.316548  | 0.687347  | -4.438538 |
| 1 | -8.316552 | 0.687916  | 4.438459  |
| 1 | -8.713785 | 1.533350  | -3.852357 |
| 1 | -8.471582 | -1.438911 | 4.556999  |
| 1 | -8.734776 | -3.412668 | 3.123392  |
| 1 | -8.851559 | 3.429939  | -2.881909 |
| 1 | -9.038235 | 4.396090  | -0.633632 |
| 1 | -8.969093 | -4.412519 | 1.220782  |
| 1 | -9.270696 | -4.149621 | -1.201664 |
| 1 | -9.189392 | 4.251827  | 1.507246  |
| 1 | -9.367407 | 2.820806  | 3.515209  |
| 1 | -9.506533 | -3.014905 | -3.011966 |
| 1 | -9.750335 | -0.789791 | -4.063137 |

Nanotube (7,5) u07v01  
B3LYP/STO-3G Energy: -6414.051584

|   |          |           |           |
|---|----------|-----------|-----------|
| 6 | 8.762932 | 0.128029  | -4.162993 |
| 6 | 8.637171 | 1.471839  | -3.909395 |
| 6 | 8.558792 | -2.186000 | 3.614806  |
| 6 | 8.431786 | -3.238452 | 2.740141  |
| 6 | 8.340626 | 3.750358  | -1.955622 |
| 6 | 8.203313 | 4.242688  | -0.674495 |
| 6 | 8.129102 | -4.299375 | -0.068273 |
| 6 | 7.993044 | -4.098123 | -1.428385 |
| 6 | 7.907165 | 3.721380  | 2.282875  |
| 6 | 7.776354 | 2.853932  | 3.353415  |
| 6 | 7.718201 | -2.102962 | -3.645489 |
| 6 | 7.600014 | -0.756345 | -4.065269 |
| 6 | 7.512592 | 0.009792  | 4.268405  |
| 6 | 7.396401 | -1.370933 | 3.968272  |
| 6 | 7.340673 | 2.062598  | -3.578991 |
| 6 | 7.202457 | 3.185413  | -2.664595 |
| 6 | 7.135052 | -3.597747 | 2.170428  |
| 6 | 6.994502 | -4.138691 | 0.823784  |
| 6 | 6.913558 | 4.244096  | -0.005607 |
| 6 | 6.772458 | 4.030507  | 1.436220  |
| 6 | 6.711036 | -3.752346 | -2.010371 |
| 6 | 6.583965 | -2.815856 | -3.145428 |
| 6 | 6.499859 | 2.256576  | 3.681661  |

|   |           |           |           |
|---|-----------|-----------|-----------|
| 6 | 6.377943  | 0.873335  | 4.194318  |
| 6 | 6.291550  | -0.138423 | -4.108264 |
| 6 | 6.165626  | 1.290255  | -3.892330 |
| 6 | 6.089082  | -1.931639 | 3.705772  |
| 6 | 5.962460  | -3.072960 | 2.818735  |
| 6 | 5.892311  | 3.526791  | -2.168368 |
| 6 | 5.749908  | 4.085663  | -0.834524 |
| 6 | 5.685577  | -4.183275 | 0.221832  |
| 6 | 5.545707  | -4.011800 | -1.214543 |
| 6 | 5.467707  | 3.748255  | 1.971711  |
| 6 | 5.331488  | 2.874445  | 3.123722  |
| 6 | 5.266240  | -2.302377 | -3.464784 |
| 6 | 5.123845  | -0.973100 | -4.002379 |
| 6 | 5.061373  | 0.266362  | 4.217636  |
| 6 | 4.920976  | -1.154017 | 4.027059  |
| 6 | 4.847996  | 1.847015  | -3.662568 |
| 6 | 4.710971  | 2.999494  | -2.824213 |
| 6 | 4.643215  | -3.445482 | 2.346795  |
| 6 | 4.504138  | -4.039106 | 1.052234  |
| 6 | 4.425889  | 4.163938  | -0.240993 |
| 6 | 4.284399  | 4.031825  | 1.175905  |
| 6 | 4.218290  | -3.778689 | -1.769296 |
| 6 | 4.080012  | -2.956059 | -2.931849 |
| 6 | 4.004988  | 2.389617  | 3.487360  |
| 6 | 3.871697  | 1.096311  | 4.084925  |
| 6 | 3.802080  | -0.368985 | -4.098413 |
| 6 | 3.667813  | 1.054503  | -3.971886 |
| 6 | 3.599004  | -1.730111 | 3.818865  |
| 6 | 3.464309  | -2.908082 | 3.008011  |
| 6 | 3.388959  | 3.399045  | -2.369765 |
| 6 | 3.247938  | 4.025529  | -1.081463 |
| 6 | 3.182066  | -4.161967 | 0.460813  |
| 6 | 3.041793  | -4.070194 | -0.971807 |
| 6 | 2.964173  | 3.836523  | 1.748842  |
| 6 | 2.826714  | 3.037724  | 2.945434  |
| 6 | 2.762437  | -2.493640 | -3.329091 |
| 6 | 2.625272  | -1.200059 | -3.963113 |
| 6 | 2.556934  | 0.495505  | 4.205007  |
| 6 | 2.422766  | -0.944489 | 4.116248  |
| 6 | 2.354095  | 1.635772  | -3.792588 |
| 6 | 2.217401  | 2.848644  | -3.011997 |
| 6 | 2.151247  | -3.326510 | 2.568571  |
| 6 | 2.013128  | -3.996174 | 1.290074  |
| 6 | 1.935990  | 4.159350  | -0.494133 |
| 6 | 1.795673  | 4.099485  | 0.947473  |
| 6 | 1.729790  | -3.886543 | -1.546076 |
| 6 | 1.590988  | -3.117215 | -2.764636 |
| 6 | 1.517601  | 2.586109  | 3.349894  |
| 6 | 1.383568  | 1.313136  | 4.025217  |
| 6 | 1.315812  | -0.604769 | -4.090831 |
| 6 | 1.181210  | 0.833129  | -4.045817 |
| 6 | 1.114268  | -1.527696 | 3.936895  |
| 6 | 0.979404  | -2.754152 | 3.187565  |
| 6 | 0.904383  | 3.264314  | -2.571901 |
| 6 | 0.764358  | 3.960485  | -1.318075 |
| 6 | 0.698219  | -4.135759 | 0.702631  |
| 6 | 0.556760  | -4.118351 | -0.729381 |
| 6 | 0.479332  | 3.917764  | 1.524408  |
| 6 | 0.340199  | 3.188485  | 2.755183  |
| 6 | 0.274164  | -2.668973 | -3.175190 |
| 6 | 0.136544  | -1.424417 | -3.880522 |
| 6 | 0.067209  | 0.716598  | 4.164209  |
| 6 | -0.067220 | -0.713295 | 4.164772  |
| 6 | -0.136549 | 1.421339  | -3.881642 |
| 6 | -0.274164 | 2.666451  | -3.177293 |
| 6 | -0.340199 | -3.186296 | 2.757698  |
| 6 | -0.479327 | -3.916553 | 1.527503  |
| 6 | -0.556751 | 4.117773  | -0.732636 |
| 6 | -0.698212 | 4.136321  | 0.699362  |
| 6 | -0.764350 | -3.961537 | -1.314946 |

|   |           |           |           |
|---|-----------|-----------|-----------|
| 6 | -0.904380 | -3.266359 | -2.569322 |
| 6 | -0.979406 | 2.756684  | 3.185388  |
| 6 | -1.114277 | 1.530820  | 3.935683  |
| 6 | -1.181216 | -0.836337 | -4.045152 |
| 6 | -1.315819 | 0.601524  | -4.091298 |
| 6 | -1.383578 | -1.309943 | 4.026241  |
| 6 | -1.517606 | -2.583451 | 3.351926  |
| 6 | -1.590986 | 3.115022  | -2.767092 |
| 6 | -1.729783 | 3.885321  | -1.549146 |
| 6 | -1.795666 | -4.098742 | 0.950711  |
| 6 | -1.935981 | -4.159755 | -0.490847 |
| 6 | -2.013121 | 3.997212  | 1.286915  |
| 6 | -2.151245 | 3.328559  | 2.565940  |
| 6 | -2.217399 | -2.851041 | -3.009744 |
| 6 | -2.354099 | -1.638782 | -3.791287 |
| 6 | -2.422776 | 0.947754  | 4.115485  |
| 6 | -2.556945 | -0.492170 | 4.205375  |
| 6 | -2.625278 | 1.196914  | -3.964041 |
| 6 | -2.762438 | 2.490999  | -3.331046 |
| 6 | -2.826717 | -3.035390 | 2.947821  |
| 6 | -2.964168 | -3.835147 | 1.751869  |
| 6 | -3.041785 | 4.069439  | -0.975023 |
| 6 | -3.182057 | 4.162355  | 0.457523  |
| 6 | -3.247929 | -4.026410 | -1.078284 |
| 6 | -3.388954 | -3.400942 | -2.367079 |
| 6 | -3.464310 | 2.910481  | 3.005706  |
| 6 | -3.599011 | 1.733144  | 3.817480  |
| 6 | -3.667818 | -1.057655 | -3.971033 |
| 6 | -3.802087 | 0.365734  | -4.098677 |
| 6 | -3.871708 | -1.093070 | 4.085758  |
| 6 | -4.004994 | -2.386851 | 3.489223  |
| 6 | -4.080012 | 2.953737  | -2.934170 |
| 6 | -4.218284 | 3.777301  | -1.772277 |
| 6 | -4.284392 | -4.030916 | 1.179086  |
| 6 | -4.425879 | -4.164161 | -0.237706 |
| 6 | -4.504130 | 4.039973  | 1.049041  |
| 6 | -4.643212 | 3.447368  | 2.344068  |
| 6 | -4.710968 | -3.001753 | -2.821839 |
| 6 | -4.847999 | -1.849927 | -3.661090 |
| 6 | -4.920985 | 1.157215  | 4.026116  |
| 6 | -5.061385 | -0.263015 | 4.217805  |
| 6 | -5.123852 | 0.969924  | -4.003111 |
| 6 | -5.266243 | 2.299629  | -3.466575 |
| 6 | -5.331492 | -2.871972 | 3.125967  |
| 6 | -5.467704 | -3.746712 | 1.974661  |
| 6 | -5.545700 | 4.010866  | -1.217712 |
| 6 | -5.685567 | 4.183493  | 0.218525  |
| 6 | -5.749898 | -4.086368 | -0.831300 |
| 6 | -5.892303 | -3.528544 | -2.165583 |
| 6 | -5.962459 | 3.075221  | 2.816297  |
| 6 | -6.089088 | 1.934588  | 3.704219  |
| 6 | -6.165631 | -1.293348 | -3.891278 |
| 6 | -6.291558 | 0.135161  | -4.108328 |
| 6 | -6.377955 | -0.870005 | 4.194957  |
| 6 | -6.499868 | -2.253655 | 3.683402  |
| 6 | -6.583965 | 2.813367  | -3.147627 |
| 6 | -6.711030 | 3.750778  | -2.013328 |
| 6 | -6.772453 | -4.029404 | 1.439394  |
| 6 | -6.913547 | -4.244154 | -0.002261 |
| 6 | -6.994493 | 4.139398  | 0.820512  |
| 6 | -7.135047 | 3.599510  | 2.167579  |
| 6 | -7.202452 | -3.187561 | -2.662074 |
| 6 | -7.340675 | -2.065450 | -3.577334 |
| 6 | -7.396409 | 1.374090  | 3.967147  |
| 6 | -7.512603 | -0.006402 | 4.268356  |
| 6 | -7.600022 | 0.753116  | -4.065809 |
| 6 | -7.718205 | 2.100070  | -3.647103 |
| 6 | -7.776360 | -2.851278 | 3.355628  |
| 6 | -7.907163 | -3.719595 | 2.285793  |
| 6 | -7.993035 | 4.097039  | -1.431622 |

|   |           |           |           |
|---|-----------|-----------|-----------|
| 6 | -8.129091 | 4.299387  | -0.071673 |
| 6 | -8.203302 | -4.243292 | -0.671153 |
| 6 | -8.340616 | -3.751968 | -1.952665 |
| 6 | -8.431784 | 3.240662  | 2.737567  |
| 6 | -8.558797 | 2.188885  | 3.613042  |
| 6 | -8.637176 | -1.474948 | -3.908180 |
| 6 | -8.762940 | -0.131334 | -4.162820 |
| 1 | 9.755045  | -0.320655 | -4.310995 |
| 1 | 9.535265  | 2.101126  | -3.860420 |
| 1 | 9.552239  | -1.862738 | 3.955612  |
| 1 | 9.330447  | -3.759943 | 2.385966  |
| 1 | 9.343208  | 3.661445  | -2.393179 |
| 1 | 9.098910  | 4.537740  | -0.112573 |
| 1 | 9.130800  | -4.446275 | 0.355458  |
| 1 | 8.890254  | -4.088776 | -2.060785 |
| 1 | 8.908023  | 4.063100  | 1.989392  |
| 1 | 8.677232  | 2.525738  | 3.887924  |
| 1 | 8.726327  | -2.506387 | -3.485344 |
| 1 | 8.520475  | 0.441009  | 4.323880  |
| 1 | -8.520493 | -0.437576 | 4.324157  |
| 1 | -8.726334 | 2.503621  | -3.487272 |
| 1 | -8.677243 | -2.522652 | 3.889865  |
| 1 | -8.908019 | -4.061556 | 1.992583  |
| 1 | -8.890246 | 4.087194  | -2.064015 |
| 1 | -9.130786 | 4.446640  | 0.351939  |
| 1 | -9.098896 | -4.537916 | -0.109001 |
| 1 | -9.343197 | -3.663411 | -2.390296 |
| 1 | -9.330442 | 3.761884  | 2.382986  |
| 1 | -9.552247 | 1.865888  | 3.954094  |
| 1 | -9.535269 | -2.104195 | -3.858705 |
| 1 | -9.755058 | 0.317234  | -4.311154 |

Nanotube (7,5) u07v02  
B3LYP/STO-3G Energy: -6489.345682

|   |          |           |           |
|---|----------|-----------|-----------|
| 6 | 8.953275 | 3.909655  | -0.944575 |
| 6 | 8.830082 | 4.010809  | 0.419132  |
| 6 | 8.571138 | -4.199275 | -1.195236 |
| 6 | 8.456577 | -3.620039 | -2.435988 |
| 6 | 8.508280 | 2.711374  | 3.121960  |
| 6 | 8.348535 | 1.602028  | 3.925072  |
| 6 | 8.208938 | -1.168245 | -4.177944 |
| 6 | 8.103267 | 0.200535  | -4.330457 |
| 6 | 7.988812 | -1.384279 | 4.175126  |
| 6 | 7.829595 | -2.637068 | 3.610079  |
| 6 | 7.885949 | 2.859724  | -2.968050 |
| 6 | 7.783511 | 3.611823  | -1.774203 |
| 6 | 7.525945 | -4.243471 | 1.095537  |
| 6 | 7.406681 | -4.303994 | -0.315075 |
| 6 | 7.530421 | 3.868296  | 1.075513  |
| 6 | 7.380650 | 3.275450  | 2.394118  |
| 6 | 7.170312 | -3.130297 | -2.927687 |
| 6 | 7.055974 | -1.964618 | -3.794480 |
| 6 | 7.045119 | 0.982375  | 4.098180  |
| 6 | 6.873469 | -0.461720 | 4.259995  |
| 6 | 6.835474 | 0.879931  | -4.145161 |
| 6 | 6.737150 | 2.218111  | -3.530011 |
| 6 | 6.541523 | -3.079213 | 3.118499  |
| 6 | 6.398581 | -3.924586 | 1.913127  |
| 6 | 6.479242 | 3.838755  | -1.187243 |
| 6 | 6.356877 | 3.998082  | 0.248814  |
| 6 | 6.101249 | -4.163299 | -0.923193 |
| 6 | 5.986668 | -3.595971 | -2.253390 |
| 6 | 6.062591 | 2.911153  | 2.852682  |
| 6 | 5.897085 | 1.768542  | 3.735226  |
| 6 | 5.759843 | -1.365312 | -3.992613 |
| 6 | 5.651835 | 0.069826  | -4.194494 |
| 6 | 5.555793 | -1.023567 | 4.127648  |

|   |           |           |           |
|---|-----------|-----------|-----------|
| 6 | 5.389433  | -2.357314 | 3.576915  |
| 6 | 5.429282  | 2.686805  | -3.115738 |
| 6 | 5.305035  | 3.548346  | -1.967097 |
| 6 | 5.077677  | -4.072551 | 1.333826  |
| 6 | 4.931556  | -4.247898 | -0.088274 |
| 6 | 5.038489  | 3.945772  | 0.846346  |
| 6 | 4.891614  | 3.433952  | 2.175556  |
| 6 | 4.676002  | -3.205838 | -2.733958 |
| 6 | 4.561745  | -2.104530 | -3.640760 |
| 6 | 4.562486  | 1.243498  | 3.965187  |
| 6 | 4.391550  | -0.156499 | 4.200956  |
| 6 | 4.338315  | 0.694760  | -4.111968 |
| 6 | 4.228891  | 2.030945  | -3.612500 |
| 6 | 4.052702  | -2.803067 | 3.202763  |
| 6 | 3.897183  | -3.705599 | 2.103818  |
| 6 | 3.989043  | 3.822134  | -1.406721 |
| 6 | 3.859887  | 4.065193  | 0.001274  |
| 6 | 3.610788  | -4.162363 | -0.697043 |
| 6 | 3.486206  | -3.678559 | -2.043148 |
| 6 | 3.562966  | 3.124229  | 2.678984  |
| 6 | 3.400280  | 2.045065  | 3.615924  |
| 6 | 3.252200  | -1.535085 | -3.911687 |
| 6 | 3.143252  | -0.125185 | -4.190755 |
| 6 | 3.058207  | -0.731975 | 4.161248  |
| 6 | 2.890316  | -2.087901 | 3.694384  |
| 6 | 2.922074  | 2.561101  | -3.266330 |
| 6 | 2.804441  | 3.504312  | -2.176508 |
| 6 | 2.575236  | -3.943626 | 1.554275  |
| 6 | 2.432809  | -4.220277 | 0.140353  |
| 6 | 2.545418  | 4.067186  | 0.609683  |
| 6 | 2.400200  | 3.627530  | 1.982098  |
| 6 | 2.179927  | -3.331350 | -2.560103 |
| 6 | 2.065744  | -2.267904 | -3.537671 |
| 6 | 2.077271  | 1.540389  | 3.899546  |
| 6 | 1.907592  | 0.135535  | 4.214125  |
| 6 | 1.844598  | 0.505981  | -4.162124 |
| 6 | 1.735558  | 1.882664  | -3.728193 |
| 6 | 1.569451  | -2.565898 | 3.363897  |
| 6 | 1.411395  | -3.537124 | 2.302479  |
| 6 | 1.501030  | 3.806590  | -1.633144 |
| 6 | 1.373305  | 4.131056  | -0.230499 |
| 6 | 1.124234  | -4.164975 | -0.467952 |
| 6 | 0.997914  | -3.753771 | -1.846429 |
| 6 | 1.081680  | 3.336923  | 2.498111  |
| 6 | 0.921321  | 2.309131  | 3.495920  |
| 6 | 0.763450  | -1.707936 | -3.826363 |
| 6 | 0.653422  | -0.316661 | -4.179410 |
| 6 | 0.579730  | -0.440347 | 4.190928  |
| 6 | 0.410015  | -1.813539 | 3.800085  |
| 6 | 0.430562  | 2.421708  | -3.399442 |
| 6 | 0.313765  | 3.420425  | -2.372682 |
| 6 | 0.088625  | -3.790817 | 1.762403  |
| 6 | -0.055932 | -4.148226 | 0.378552  |
| 6 | 0.055933  | 4.148052  | 0.380454  |
| 6 | -0.088625 | 3.790007  | 1.764141  |
| 6 | -0.313765 | -3.419337 | -2.374249 |
| 6 | -0.430562 | -2.420149 | -3.400551 |
| 6 | -0.410016 | 1.811795  | 3.800915  |
| 6 | -0.579731 | 0.438424  | 4.191129  |
| 6 | -0.653422 | 0.318577  | -4.179264 |
| 6 | -0.763450 | 1.709690  | -3.825580 |
| 6 | -0.921321 | -2.310735 | 3.494860  |
| 6 | -1.081680 | -3.338070 | 2.496580  |
| 6 | -0.997913 | 3.754617  | -1.844707 |
| 6 | -1.124233 | 4.165188  | -0.466043 |
| 6 | -1.373305 | -4.130951 | -0.232393 |
| 6 | -1.501029 | -3.805842 | -1.634889 |
| 6 | -1.411395 | 3.536067  | 2.304099  |
| 6 | -1.569451 | 2.564354  | 3.365071  |
| 6 | -1.735559 | -1.880955 | -3.729054 |

|   |           |           |           |
|---|-----------|-----------|-----------|
| 6 | -1.844599 | -0.504072 | -4.162355 |
| 6 | -1.907593 | -0.137469 | 4.214061  |
| 6 | -2.077271 | -1.542178 | 3.898839  |
| 6 | -2.065744 | 2.269526  | -3.536630 |
| 6 | -2.179926 | 3.332523  | -2.558576 |
| 6 | -2.400200 | -3.628441 | 1.980435  |
| 6 | -2.545417 | -4.067469 | 0.607818  |
| 6 | -2.432808 | 4.220212  | 0.142287  |
| 6 | -2.575235 | 3.942913  | 1.556083  |
| 6 | -2.804441 | -3.503315 | -2.178113 |
| 6 | -2.922074 | -2.559603 | -3.267503 |
| 6 | -2.890317 | 2.086206  | 3.695338  |
| 6 | -3.058208 | 0.730066  | 4.161580  |
| 6 | -3.143253 | 0.127107  | -4.190695 |
| 6 | -3.252201 | 1.536878  | -3.910981 |
| 6 | -3.400280 | -2.046724 | 3.614986  |
| 6 | -3.562966 | -3.125460 | 2.677552  |
| 6 | -3.486205 | 3.679498  | -2.041462 |
| 6 | -3.610787 | 4.162685  | -0.695135 |
| 6 | -3.859886 | -4.065196 | -0.000589 |
| 6 | -3.989043 | -3.821490 | -1.408472 |
| 6 | -3.897182 | 3.704634  | 2.105515  |
| 6 | -4.052702 | 2.801598  | 3.204046  |
| 6 | -4.228891 | -2.029288 | -3.613428 |
| 6 | -4.338316 | -0.692874 | -4.112283 |
| 6 | -4.391551 | 0.154571  | 4.201024  |
| 6 | -4.562487 | -1.245317 | 3.964615  |
| 6 | -4.561745 | 2.106200  | -3.639793 |
| 6 | -4.676001 | 3.207093  | -2.732487 |
| 6 | -4.891614 | -3.434952 | 2.173982  |
| 6 | -5.038488 | -3.946163 | 0.844538  |
| 6 | -4.931554 | 4.247941  | -0.086327 |
| 6 | -5.077676 | 4.071940  | 1.335692  |
| 6 | -5.305035 | -3.547445 | -1.968722 |
| 6 | -5.429283 | -2.685376 | -3.116967 |
| 6 | -5.389433 | 2.355673  | 3.577991  |
| 6 | -5.555794 | 1.021674  | 4.128113  |
| 6 | -5.651836 | -0.067902 | -4.194521 |
| 6 | -5.759844 | 1.367143  | -3.991982 |
| 6 | -5.897086 | -1.770256 | 3.734413  |
| 6 | -6.062591 | -2.912463 | 2.851347  |
| 6 | -5.986666 | 3.597008  | -2.251742 |
| 6 | -6.101247 | 4.163727  | -0.921285 |
| 6 | -6.356876 | -3.998199 | 0.246981  |
| 6 | -6.479241 | -3.838213 | -1.189002 |
| 6 | -6.398581 | 3.923711  | 1.914924  |
| 6 | -6.541524 | 3.077783  | 3.119906  |
| 6 | -6.737151 | -2.216492 | -3.531024 |
| 6 | -6.835476 | -0.878029 | -4.145557 |
| 6 | -6.873470 | 0.459766  | 4.260202  |
| 6 | -7.045120 | -0.984255 | 4.097726  |
| 6 | -7.055974 | 1.966360  | -3.793575 |
| 6 | -7.170310 | 3.131645  | -2.926251 |
| 6 | -7.380650 | -3.276551 | 2.392616  |
| 6 | -7.530420 | -3.868795 | 1.073740  |
| 6 | -7.406679 | 4.304148  | -0.313104 |
| 6 | -7.525944 | 4.242975  | 1.097480  |
| 6 | -7.783511 | -3.611013 | -1.775857 |
| 6 | -7.885949 | -2.858366 | -2.969359 |
| 6 | -7.829595 | 2.635412  | 3.611284  |
| 6 | -7.988812 | 1.382364  | 4.175756  |
| 6 | -8.103268 | -0.198548 | -4.330539 |
| 6 | -8.208939 | 1.170163  | -4.177399 |
| 6 | -8.348535 | -1.603826 | 3.924331  |
| 6 | -8.508281 | -2.712806 | 3.120713  |
| 6 | -8.456574 | 3.621166  | -2.434331 |
| 6 | -8.571135 | 4.199836  | -1.193314 |
| 6 | -8.830081 | -4.011008 | 0.417294  |
| 6 | -8.953274 | -3.909227 | -0.946367 |
| 1 | 9.945416  | 3.918854  | -1.416883 |

|   |           |           |           |
|---|-----------|-----------|-----------|
| 1 | 9.730376  | 4.107236  | 1.039718  |
| 1 | 9.558641  | -4.470689 | -0.796853 |
| 1 | 9.359134  | -3.433076 | -3.032156 |
| 1 | 9.518558  | 3.091997  | 2.924490  |
| 1 | 9.234179  | 1.116113  | 4.354561  |
| 1 | 9.200356  | -1.637774 | -4.212185 |
| 1 | 9.013712  | 0.794467  | -4.483204 |
| 1 | 8.997804  | -1.035250 | 4.429610  |
| 1 | 8.716516  | -3.257772 | 3.428224  |
| 1 | 8.888182  | 2.581203  | -3.317973 |
| 1 | 8.535027  | -4.211369 | 1.525967  |
| 1 | -8.535026 | 4.210688  | 1.527898  |
| 1 | -8.888182 | -2.579688 | -3.319158 |
| 1 | -8.716516 | 3.256200  | 3.429714  |
| 1 | -8.997804 | 1.033221  | 4.430085  |
| 1 | -9.013715 | -0.792410 | -4.483553 |
| 1 | -9.200358 | 1.639707  | -4.211423 |
| 1 | -9.234181 | -1.118106 | 4.354039  |
| 1 | -9.518559 | -3.093336 | 2.923065  |
| 1 | -9.359132 | 3.434478  | -3.030584 |
| 1 | -9.558638 | 4.471072  | -0.794808 |
| 1 | -9.730375 | -4.107719 | 1.037836  |
| 1 | -9.945416 | -3.918208 | -1.418678 |

Nanotube (7,5) u07v03  
B3LYP/STO-3G Energy: -6564.639571

|   |          |           |           |
|---|----------|-----------|-----------|
| 6 | 8.993582 | -3.681429 | 1.873259  |
| 6 | 8.852190 | -4.127156 | 0.582635  |
| 6 | 8.764546 | 4.230359  | 0.040790  |
| 6 | 8.652239 | 3.991169  | 1.388843  |
| 6 | 8.523861 | -3.559158 | -2.360958 |
| 6 | 8.376800 | -2.689436 | -3.420279 |
| 6 | 8.379280 | 2.072169  | 3.701504  |
| 6 | 8.250903 | 0.790915  | 4.199751  |
| 6 | 8.073350 | 0.141289  | -4.422937 |
| 6 | 7.944509 | 1.499727  | -4.197126 |
| 6 | 7.970063 | -2.123998 | 3.565308  |
| 6 | 7.839493 | -3.154473 | 2.606029  |
| 6 | 7.697096 | 3.704706  | -2.178558 |
| 6 | 7.593052 | 4.127608  | -0.831136 |
| 6 | 7.547555 | -4.129324 | -0.080211 |
| 6 | 7.393685 | -3.891866 | -1.504871 |
| 6 | 7.362190 | 3.668259  | 1.996366  |
| 6 | 7.236100 | 2.766889  | 3.132637  |
| 6 | 7.083696 | -2.105442 | -3.737907 |
| 6 | 6.938888 | -0.748411 | -4.263050 |
| 6 | 6.968499 | 0.112126  | 4.202267  |
| 6 | 6.839083 | -1.335591 | 3.952013  |
| 6 | 6.669813 | 2.081009  | -3.829458 |
| 6 | 6.555034 | 3.209611  | -2.881690 |
| 6 | 6.523885 | -3.497649 | 2.105863  |
| 6 | 6.381221 | -4.017374 | 0.760160  |
| 6 | 6.291100 | 4.174274  | -0.200311 |
| 6 | 6.179674 | 3.969563  | 1.231229  |
| 6 | 6.077357 | -3.628513 | -2.033448 |
| 6 | 5.924229 | -2.747441 | -3.178698 |
| 6 | 5.931322 | 2.264999  | 3.486048  |
| 6 | 5.799954 | 0.932202  | 4.050696  |
| 6 | 5.633721 | -0.143126 | -4.273634 |
| 6 | 5.499155 | 1.290658  | -4.083224 |
| 6 | 5.518352 | -1.868673 | 3.682148  |
| 6 | 5.364732 | -2.993447 | 2.793644  |
| 6 | 5.243356 | 3.529490  | -2.353678 |
| 6 | 5.114829 | 4.066134  | -1.022902 |
| 6 | 5.057243 | -4.091658 | 0.177825  |
| 6 | 4.904466 | -3.934089 | -1.237506 |
| 6 | 4.867686 | 3.741753  | 1.802657  |

|   |           |           |           |
|---|-----------|-----------|-----------|
| 6 | 4.743234  | 2.912536  | 2.962621  |
| 6 | 4.598038  | -2.270159 | -3.528031 |
| 6 | 4.452250  | -0.974515 | -4.115708 |
| 6 | 4.475255  | 0.333980  | 4.140065  |
| 6 | 4.336287  | -1.082949 | 4.002027  |
| 6 | 4.175736  | 1.846037  | -3.830071 |
| 6 | 4.048586  | 3.002486  | -2.998186 |
| 6 | 4.037771  | -3.373871 | 2.330951  |
| 6 | 3.886839  | -3.964903 | 1.032933  |
| 6 | 3.799176  | 4.164994  | -0.405534 |
| 6 | 3.679179  | 4.044065  | 1.019276  |
| 6 | 3.576333  | -3.733234 | -1.794551 |
| 6 | 3.424114  | -2.928359 | -2.976055 |
| 6 | 3.426300  | 2.457462  | 3.377499  |
| 6 | 3.295278  | 1.170935  | 4.011354  |
| 6 | 3.130934  | -0.379490 | -4.218728 |
| 6 | 2.994389  | 1.053195  | -4.116511 |
| 6 | 3.015882  | -1.657886 | 3.812977  |
| 6 | 2.868171  | -2.845064 | 3.002843  |
| 6 | 2.736681  | 3.400759  | -2.521173 |
| 6 | 2.613254  | 4.030906  | -1.224698 |
| 6 | 2.564689  | -4.092741 | 0.453677  |
| 6 | 2.411441  | -4.014446 | -0.983507 |
| 6 | 2.371472  | 3.866583  | 1.614750  |
| 6 | 2.248299  | 3.093056  | 2.833411  |
| 6 | 2.107658  | -2.484603 | -3.372518 |
| 6 | 1.962326  | -1.206752 | -4.039874 |
| 6 | 1.985116  | 0.580205  | 4.156216  |
| 6 | 1.846787  | -0.859579 | 4.094684  |
| 6 | 1.686363  | 1.628850  | -3.915114 |
| 6 | 1.557682  | 2.842203  | -3.136742 |
| 6 | 1.552829  | -3.250130 | 2.564882  |
| 6 | 1.401529  | -3.916752 | 1.291082  |
| 6 | 1.310172  | 4.159298  | -0.615983 |
| 6 | 1.190149  | 4.115473  | 0.822883  |
| 6 | 1.092579  | -3.835835 | -1.547849 |
| 6 | 0.941033  | -3.096500 | -2.776546 |
| 6 | 0.939961  | 2.652530  | 3.263930  |
| 6 | 0.809279  | 1.402521  | 3.966812  |
| 6 | 0.646771  | -0.616140 | -4.161738 |
| 6 | 0.508434  | 0.815262  | -4.139147 |
| 6 | 0.529843  | -1.439032 | 3.926736  |
| 6 | 0.382795  | -2.665355 | 3.191391  |
| 6 | 0.246128  | 3.252847  | -2.673180 |
| 6 | 0.121850  | 3.951735  | -1.424439 |
| 6 | 0.077199  | -4.058151 | 0.714031  |
| 6 | -0.077198 | -4.058074 | -0.714463 |
| 6 | -0.121849 | 3.951582  | 1.424860  |
| 6 | -0.246128 | 3.252560  | 2.673525  |
| 6 | -0.382795 | -2.665012 | -3.191674 |
| 6 | -0.529843 | -1.438611 | -3.926888 |
| 6 | -0.508434 | 0.814818  | 4.139233  |
| 6 | -0.646772 | -0.616586 | 4.161673  |
| 6 | -0.809280 | 1.402946  | -3.966663 |
| 6 | -0.939961 | 2.652880  | -3.263648 |
| 6 | -0.941033 | -3.096798 | 2.776217  |
| 6 | -1.092579 | -3.836002 | 1.547441  |
| 6 | -1.190149 | 4.115562  | -0.822445 |
| 6 | -1.310171 | 4.159232  | 0.616426  |
| 6 | -1.401528 | -3.916614 | -1.291498 |
| 6 | -1.552828 | -3.249854 | -2.565227 |
| 6 | -1.557682 | 2.841866  | 3.137043  |
| 6 | -1.686363 | 1.628430  | 3.915286  |
| 6 | -1.846787 | -0.859140 | -4.094774 |
| 6 | -1.985117 | 0.580650  | -4.156154 |
| 6 | -1.962327 | -1.207185 | 4.039746  |
| 6 | -2.107658 | -2.484965 | 3.372254  |
| 6 | -2.248299 | 3.093361  | -2.833082 |
| 6 | -2.371471 | 3.866758  | -1.614339 |
| 6 | -2.411440 | -4.014553 | 0.983080  |



|   |           |           |           |
|---|-----------|-----------|-----------|
| 6 | -2.564688 | -4.092693 | -0.454113 |
| 6 | -2.613254 | 4.030775  | 1.225127  |
| 6 | -2.736681 | 3.400488  | 2.521535  |
| 6 | -2.868171 | -2.844742 | -3.003144 |
| 6 | -3.015883 | -1.657478 | -3.813152 |
| 6 | -2.994390 | 1.052754  | 4.116621  |
| 6 | -3.130934 | -0.379942 | 4.218686  |
| 6 | -3.295278 | 1.171365  | -4.011229 |
| 6 | -3.426300 | 2.457825  | -3.377238 |
| 6 | -3.424114 | -2.928680 | 2.975744  |
| 6 | -3.576333 | -3.733429 | 1.794154  |
| 6 | -3.679178 | 4.044177  | -1.018846 |
| 6 | -3.799176 | 4.164953  | 0.405977  |
| 6 | -3.886838 | -3.964794 | -1.033355 |
| 6 | -4.037771 | -3.373622 | -2.331309 |
| 6 | -4.048587 | 3.002164  | 2.998503  |
| 6 | -4.175737 | 1.845626  | 3.830265  |
| 6 | -4.336288 | -1.082520 | -4.002140 |
| 6 | -4.475255 | 0.334424  | -4.140028 |
| 6 | -4.452251 | -0.974956 | 4.115602  |
| 6 | -4.598038 | -2.270538 | 3.527789  |
| 6 | -4.743234 | 2.912856  | -2.962311 |
| 6 | -4.867685 | 3.741950  | -1.802260 |
| 6 | -4.904466 | -3.934225 | 1.237088  |
| 6 | -5.057242 | -4.091642 | -0.178260 |
| 6 | -5.114828 | 4.066027  | 1.023335  |
| 6 | -5.243356 | 3.529239  | 2.354053  |
| 6 | -5.364732 | -2.993147 | -2.793961 |
| 6 | -5.518352 | -1.868278 | -3.682344 |
| 6 | -5.499156 | 1.290220  | 4.083357  |
| 6 | -5.633722 | -0.143585 | 4.273615  |
| 6 | -5.799954 | 0.932637  | -4.050595 |
| 6 | -5.931322 | 2.265374  | -3.485807 |
| 6 | -5.924228 | -2.747784 | 3.178406  |
| 6 | -6.077357 | -3.628735 | 2.033063  |
| 6 | -6.179674 | 3.969700  | -1.230807 |
| 6 | -6.291099 | 4.174256  | 0.200755  |
| 6 | -6.381220 | -4.017295 | -0.760587 |
| 6 | -6.523884 | -3.497425 | -2.106234 |
| 6 | -6.555034 | 3.209302  | 2.882029  |
| 6 | -6.669814 | 2.080598  | 3.829674  |
| 6 | -6.839084 | -1.335167 | -3.952151 |
| 6 | -6.968500 | 0.112577  | -4.202252 |
| 6 | -6.938888 | -0.748869 | 4.262968  |
| 6 | -7.083696 | -2.105845 | 3.737683  |
| 6 | -7.236100 | 2.767227  | -3.132343 |
| 6 | -7.362189 | 3.668478  | -1.995977 |
| 6 | -7.393684 | -3.892033 | 1.504457  |
| 6 | -7.547554 | -4.129337 | 0.079772  |
| 6 | -7.593051 | 4.127523  | 0.831574  |
| 6 | -7.697097 | 3.704473  | 2.178950  |
| 6 | -7.839493 | -3.154194 | -2.606362 |
| 6 | -7.970064 | -2.123614 | -3.565528 |
| 6 | -7.944511 | 1.499276  | 4.197279  |
| 6 | -8.073351 | 0.140815  | 4.422948  |
| 6 | -8.250903 | 0.791365  | -4.199663 |
| 6 | -8.379281 | 2.072568  | -3.701281 |
| 6 | -8.376800 | -2.689807 | 3.419994  |
| 6 | -8.523861 | -3.559418 | 2.360581  |
| 6 | -8.652238 | 3.991325  | -1.388419 |
| 6 | -8.764545 | 4.230371  | -0.040340 |
| 6 | -8.852189 | -4.127098 | -0.583074 |
| 6 | -8.993581 | -3.681231 | -1.873650 |
| 1 | 9.990789  | -3.591128 | 2.325967  |
| 1 | 9.742789  | -4.400346 | 0.001975  |
| 1 | 9.752416  | 4.372226  | -0.419111 |
| 1 | 9.556995  | 3.946905  | 2.008866  |
| 1 | 9.528384  | -3.899976 | -2.079350 |
| 1 | 9.266502  | -2.350284 | -3.966500 |
| 1 | 9.378922  | 2.515843  | 3.609687  |

|   |           |           |           |
|---|-----------|-----------|-----------|
| 1 | 9.151780  | 0.237759  | 4.495488  |
| 1 | 9.072472  | -0.283173 | -4.584968 |
| 1 | 8.845009  | 2.127379  | -4.185217 |
| 1 | 8.981134  | -1.785836 | 3.825740  |
| 1 | 8.700832  | 3.542845  | -2.591862 |
| 1 | -8.700837 | 3.542561  | 2.592234  |
| 1 | -8.981137 | -1.785420 | -3.825919 |
| 1 | -8.845010 | 2.126929  | 4.185436  |
| 1 | -9.072473 | -0.283665 | 4.584933  |
| 1 | -9.151781 | 0.238240  | -4.495458 |
| 1 | -9.378922 | 2.516231  | -3.609418 |
| 1 | -9.266502 | -2.350715 | 3.966252  |
| 1 | -9.528383 | -3.900207 | 2.078937  |
| 1 | -9.556993 | 3.947130  | -2.008448 |
| 1 | -9.752415 | 4.372190  | 0.419575  |
| 1 | -9.742788 | -4.400351 | -0.002444 |
| 1 | -9.990789 | -3.590881 | -2.326348 |

Nanotube (7,5) u07v04  
B3LYP/STO-3G Energy: -6639.933293

|   |          |           |           |
|---|----------|-----------|-----------|
| 6 | 9.122314 | 2.954237  | -2.827877 |
| 6 | 9.006151 | 3.718300  | -1.693577 |
| 6 | 8.807920 | -4.215901 | 0.968722  |
| 6 | 8.677239 | -4.328950 | -0.393829 |
| 6 | 8.712082 | 3.932291  | 1.300356  |
| 6 | 8.568210 | 3.366177  | 2.548526  |
| 6 | 8.395136 | -3.063681 | -3.118335 |
| 6 | 8.278013 | -1.950758 | -3.926471 |
| 6 | 8.241287 | 0.892105  | 4.245790  |
| 6 | 8.091108 | -0.476026 | 4.376321  |
| 6 | 8.050948 | 1.034374  | -4.053924 |
| 6 | 7.949911 | 2.277665  | -3.389359 |
| 6 | 7.783327 | -3.119608 | 2.991093  |
| 6 | 7.652013 | -3.871278 | 1.799110  |
| 6 | 7.711208 | 3.913623  | -1.039953 |
| 6 | 7.574253 | 4.052388  | 0.398508  |
| 6 | 7.382131 | -4.148970 | -1.048738 |
| 6 | 7.250811 | -3.567563 | -2.375951 |
| 6 | 7.271594 | 2.903995  | 3.018263  |
| 6 | 7.116081 | 1.730419  | 3.874683  |
| 6 | 7.005779 | -1.271077 | -4.087306 |
| 6 | 6.902052 | 0.193748  | -4.214538 |
| 6 | 6.802796 | -1.110836 | 4.183351  |
| 6 | 6.658504 | -2.441318 | 3.558071  |
| 6 | 6.646699 | 2.761882  | -2.980813 |
| 6 | 6.531007 | 3.611243  | -1.812262 |
| 6 | 6.339211 | -4.055964 | 1.216736  |
| 6 | 6.207450 | -4.222956 | -0.217598 |
| 6 | 6.261736 | 3.956312  | 0.990624  |
| 6 | 6.112657 | 3.401144  | 2.325026  |
| 6 | 5.947720 | -3.149181 | -2.831158 |
| 6 | 5.827272 | -2.003751 | -3.717483 |
| 6 | 5.802964 | 1.170261  | 4.054783  |
| 6 | 5.646514 | -0.262095 | 4.240472  |
| 6 | 5.593743 | 0.802463  | -4.077463 |
| 6 | 5.470255 | 2.120186  | -3.505507 |
| 6 | 5.334755 | -2.864469 | 3.146186  |
| 6 | 5.177888 | -3.721654 | 1.998515  |
| 6 | 5.217065 | 3.856230  | -1.255153 |
| 6 | 5.082159 | 4.068221  | 0.155153  |
| 6 | 4.890025 | -4.125648 | -0.812725 |
| 6 | 4.758835 | -3.618623 | -2.145126 |
| 6 | 4.785657 | 3.051458  | 2.798502  |
| 6 | 4.630847 | 1.952608  | 3.700697  |
| 6 | 4.510834 | -1.424283 | -3.942476 |
| 6 | 4.395460 | -0.017120 | -4.172360 |
| 6 | 4.312778 | -0.841417 | 4.153485  |

|   |           |           |           |
|---|-----------|-----------|-----------|
| 6 | 4.157656  | -2.170021 | 3.648219  |
| 6 | 4.156468  | 2.630739  | -3.142603 |
| 6 | 4.032885  | 3.536053  | -2.037576 |
| 6 | 3.851774  | -3.952165 | 1.442594  |
| 6 | 3.710171  | -4.195775 | 0.036093  |
| 6 | 3.759453  | 4.038211  | 0.758568  |
| 6 | 3.612582  | 3.564913  | 2.107185  |
| 6 | 3.442261  | -3.259629 | -2.646412 |
| 6 | 3.320296  | -2.177604 | -3.587845 |
| 6 | 3.302863  | 1.425700  | 3.966392  |
| 6 | 3.145752  | 0.018814  | 4.238667  |
| 6 | 3.086891  | 0.611417  | -4.123747 |
| 6 | 2.969097  | 1.968693  | -3.645314 |
| 6 | 2.832940  | -2.655762 | 3.305126  |
| 6 | 2.680567  | -3.593337 | 2.215480  |
| 6 | 2.720908  | 3.831140  | -1.496706 |
| 6 | 2.586514  | 4.123506  | -0.086261 |
| 6 | 2.394988  | -4.151591 | -0.569356 |
| 6 | 2.263087  | -3.712112 | -1.942485 |
| 6 | 2.295274  | 3.259361  | 2.617423  |
| 6 | 2.142120  | 2.198841  | 3.592445  |
| 6 | 2.016634  | -1.619641 | -3.865298 |
| 6 | 1.901130  | -0.211278 | -4.177806 |
| 6 | 1.827177  | -0.567626 | 4.208694  |
| 6 | 1.670753  | -1.938903 | 3.772250  |
| 6 | 1.666522  | 2.497446  | -3.313838 |
| 6 | 1.543407  | 3.469608  | -2.250966 |
| 6 | 1.366181  | -3.851832 | 1.676115  |
| 6 | 1.222993  | -4.171379 | 0.274299  |
| 6 | 1.273571  | 4.117263  | 0.518108  |
| 6 | 1.128924  | 3.717505  | 1.896467  |
| 6 | 0.954476  | -3.371622 | -2.455263 |
| 6 | 0.831354  | -2.342294 | -3.455631 |
| 6 | 0.821342  | 1.681575  | 3.876126  |
| 6 | 0.663873  | 0.295361  | 4.227092  |
| 6 | 0.596298  | 0.416380  | -4.153345 |
| 6 | 0.479132  | 1.794012  | -3.758584 |
| 6 | 0.348076  | -2.433906 | 3.447039  |
| 6 | 0.194735  | -3.427087 | 2.420408  |
| 6 | 0.230279  | 3.776761  | -1.715968 |
| 6 | 0.095687  | 4.140396  | -0.332735 |
| 6 | -0.095687 | -4.140394 | -0.332760 |
| 6 | -0.230279 | -3.776750 | -1.715991 |
| 6 | -0.194735 | 3.427072  | 2.420428  |
| 6 | -0.348075 | 2.433885  | 3.447053  |
| 6 | -0.479132 | -1.793988 | -3.758594 |
| 6 | -0.596298 | -0.416354 | -4.153347 |
| 6 | -0.663873 | -0.295387 | 4.227090  |
| 6 | -0.821342 | -1.681599 | 3.876116  |
| 6 | -0.831354 | 2.342315  | -3.455617 |
| 6 | -0.954476 | 3.371638  | -2.455243 |
| 6 | -1.128924 | -3.717516 | 1.896445  |
| 6 | -1.273571 | -4.117266 | 0.518083  |
| 6 | -1.222993 | 4.171377  | 0.274324  |
| 6 | -1.366181 | 3.851821  | 1.676138  |
| 6 | -1.543407 | -3.469594 | -2.250986 |
| 6 | -1.666522 | -2.497426 | -3.313852 |
| 6 | -1.670752 | 1.938880  | 3.772262  |
| 6 | -1.827177 | 0.567600  | 4.208697  |
| 6 | -1.901130 | 0.211304  | -4.177805 |
| 6 | -2.016634 | 1.619665  | -3.865288 |
| 6 | -2.142120 | -2.198863 | 3.592432  |
| 6 | -2.295274 | -3.259377 | 2.617404  |
| 6 | -2.263088 | 3.712124  | -1.942462 |
| 6 | -2.394989 | 4.151595  | -0.569331 |
| 6 | -2.586514 | -4.123506 | -0.086285 |
| 6 | -2.720908 | -3.831130 | -1.496729 |
| 6 | -2.680566 | 3.593323  | 2.215502  |
| 6 | -2.832940 | 2.655742  | 3.305142  |
| 6 | -2.969097 | -1.968670 | -3.645325 |

|   |           |           |           |
|---|-----------|-----------|-----------|
| 6 | -3.086891 | -0.611392 | -4.123750 |
| 6 | -3.145752 | -0.018840 | 4.238667  |
| 6 | -3.302863 | -1.425724 | 3.966384  |
| 6 | -3.320297 | 2.177625  | -3.587832 |
| 6 | -3.442261 | 3.259645  | -2.646391 |
| 6 | -3.612582 | -3.564926 | 2.107164  |
| 6 | -3.759453 | -4.038215 | 0.758545  |
| 6 | -3.710171 | 4.195775  | 0.036119  |
| 6 | -3.851773 | 3.952156  | 1.442618  |
| 6 | -4.032885 | -3.536040 | -2.037597 |
| 6 | -4.156468 | -2.630719 | -3.142618 |
| 6 | -4.157656 | 2.169998  | 3.648233  |
| 6 | -4.312778 | 0.841391  | 4.153491  |
| 6 | -4.395460 | 0.017145  | -4.172360 |
| 6 | -4.510835 | 1.424307  | -3.942466 |
| 6 | -4.630847 | -1.952631 | 3.700687  |
| 6 | -4.785657 | -3.051476 | 2.798484  |
| 6 | -4.758835 | 3.618635  | -2.145103 |
| 6 | -4.890026 | 4.125652  | -0.812700 |
| 6 | -5.082160 | -4.068221 | 0.155130  |
| 6 | -5.217065 | -3.856221 | -1.255176 |
| 6 | -5.177887 | 3.721641  | 1.998538  |
| 6 | -5.334755 | 2.864450  | 3.146203  |
| 6 | -5.470255 | -2.120164 | -3.505519 |
| 6 | -5.593742 | -0.802438 | -4.077469 |
| 6 | -5.646514 | 0.262069  | 4.240475  |
| 6 | -5.802964 | -1.170286 | 4.054777  |
| 6 | -5.827272 | 2.003772  | -3.717470 |
| 6 | -5.947721 | 3.149198  | -2.831138 |
| 6 | -6.112657 | -3.401159 | 2.325007  |
| 6 | -6.261736 | -3.956317 | 0.990601  |
| 6 | -6.207450 | 4.222957  | -0.217572 |
| 6 | -6.339210 | 4.055956  | 1.216761  |
| 6 | -6.531007 | -3.611231 | -1.812283 |
| 6 | -6.646698 | -2.761864 | -2.980831 |
| 6 | -6.658504 | 2.441296  | 3.558086  |
| 6 | -6.802796 | 1.110811  | 4.183358  |
| 6 | -6.902052 | -0.193724 | -4.214543 |
| 6 | -7.005780 | 1.271101  | -4.087300 |
| 6 | -7.116081 | -1.730443 | 3.874674  |
| 6 | -7.271594 | -2.904014 | 3.018247  |
| 6 | -7.250811 | 3.567577  | -2.375930 |
| 6 | -7.382131 | 4.148976  | -1.048713 |
| 6 | -7.574253 | -4.052389 | 0.398484  |
| 6 | -7.711209 | -3.913615 | -1.039976 |
| 6 | -7.652013 | 3.871267  | 1.799135  |
| 6 | -7.783327 | 3.119591  | 2.991113  |
| 6 | -7.949910 | -2.277647 | -3.389376 |
| 6 | -8.050946 | -1.034353 | -4.053939 |
| 6 | -8.091108 | 0.475999  | 4.376324  |
| 6 | -8.241287 | -0.892131 | 4.245785  |
| 6 | -8.278013 | 1.950784  | -3.926462 |
| 6 | -8.395136 | 3.063702  | -3.118319 |
| 6 | -8.568210 | -3.366194 | 2.548507  |
| 6 | -8.712082 | -3.932301 | 1.300334  |
| 6 | -8.677239 | 4.328954  | -0.393801 |
| 6 | -8.807919 | 4.215897  | 0.968748  |
| 6 | -9.006151 | -3.718288 | -1.693600 |
| 6 | -9.122313 | -2.954220 | -2.827898 |
| 1 | 10.111377 | 2.733284  | -3.252665 |
| 1 | 9.908896  | 4.115479  | -1.211630 |
| 1 | 9.800835  | -4.253472 | 1.438005  |
| 1 | 9.572230  | -4.462529 | -1.015218 |
| 1 | 9.716831  | 4.173944  | 0.930764  |
| 1 | 9.460550  | 3.164766  | 3.155253  |
| 1 | 9.389094  | -3.488564 | -2.928423 |
| 1 | 9.181906  | -1.509054 | -4.365701 |
| 1 | 9.247960  | 1.327745  | 4.284352  |
| 1 | 8.982487  | -1.101041 | 4.517012  |
| 1 | 9.052740  | 0.622170  | -4.229818 |

|   |            |           |           |
|---|------------|-----------|-----------|
| 1 | 8.795438   | -2.874835 | 3.337808  |
| 1 | -8.795436  | 2.874817  | 3.337828  |
| 1 | -9.052740  | -0.622150 | -4.229832 |
| 1 | -8.982487  | 1.101013  | 4.517019  |
| 1 | -9.247960  | -1.327772 | 4.284345  |
| 1 | -9.181906  | 1.509086  | -4.365699 |
| 1 | -9.389094  | 3.488585  | -2.928406 |
| 1 | -9.460550  | -3.164788 | 3.155237  |
| 1 | -9.716832  | -4.173954 | 0.930742  |
| 1 | -9.572230  | 4.462539  | -1.015190 |
| 1 | -9.800834  | 4.253467  | 1.438033  |
| 1 | -9.908896  | -4.115469 | -1.211655 |
| 1 | -10.111375 | -2.733267 | -3.252686 |

Nanotube (7,5) u07v05  
B3LYP/STO-3G Energy: -6715.230940

|   |          |           |           |
|---|----------|-----------|-----------|
| 6 | 9.223828 | -2.215364 | 3.401852  |
| 6 | 9.081885 | -3.250395 | 2.499696  |
| 6 | 8.917201 | 3.722586  | -2.126097 |
| 6 | 8.811708 | 4.188198  | -0.829647 |
| 6 | 8.733268 | -4.228694 | -0.329223 |
| 6 | 8.572232 | -4.003658 | -1.689404 |
| 6 | 8.561376 | 3.682320  | 2.131914  |
| 6 | 8.446952 | 2.812528  | 3.211324  |
| 6 | 8.240074 | -2.053135 | -3.966169 |
| 6 | 8.102479 | -0.752870 | -4.448346 |
| 6 | 8.192991 | -0.032694 | 4.121247  |
| 6 | 8.071797 | -1.419631 | 3.797113  |
| 6 | 7.847987 | 2.166991  | -3.795113 |
| 6 | 7.748324 | 3.213209  | -2.823789 |
| 6 | 7.782586 | -3.599062 | 1.950865  |
| 6 | 7.618604 | -4.107885 | 0.580727  |
| 6 | 7.534615 | 4.216029  | -0.140634 |
| 6 | 7.419434 | 3.995434  | 1.311151  |
| 6 | 7.282892 | -3.671121 | -2.241802 |
| 6 | 7.122928 | -2.745721 | -3.383516 |
| 6 | 7.183362 | 2.221982  | 3.560776  |
| 6 | 7.068017 | 0.826994  | 4.069489  |
| 6 | 6.837884 | -0.074944 | -4.409414 |
| 6 | 6.719289 | 1.387399  | -4.143856 |
| 6 | 6.764888 | -1.968832 | 3.537384  |
| 6 | 6.622513 | -3.087134 | 2.624736  |
| 6 | 6.454691 | 3.551513  | -2.286458 |
| 6 | 6.349973 | 4.080226  | -0.940408 |
| 6 | 6.300830 | -4.135605 | 0.004254  |
| 6 | 6.133146 | -3.939362 | -1.422728 |
| 6 | 6.122301 | 3.713162  | 1.868159  |
| 6 | 6.004621 | 2.838496  | 3.017857  |
| 6 | 5.813997 | -2.223340 | -3.668182 |
| 6 | 5.669210 | -0.889205 | -4.212762 |
| 6 | 5.745265 | 0.222212  | 4.100545  |
| 6 | 5.598991 | -1.193603 | 3.892328  |
| 6 | 5.400287 | 1.916472  | -3.828520 |
| 6 | 5.271863 | 3.041470  | -2.940976 |
| 6 | 5.290724 | -3.450066 | 2.168476  |
| 6 | 5.128836 | -4.017296 | 0.860864  |
| 6 | 5.035683 | 4.160327  | -0.322645 |
| 6 | 4.921214 | 4.014056  | 1.101263  |
| 6 | 4.795524 | -3.710511 | -1.952255 |
| 6 | 4.635043 | -2.876537 | -3.112333 |
| 6 | 4.682137 | 2.363048  | 3.410659  |
| 6 | 4.557755 | 1.054263  | 4.007273  |
| 6 | 4.340287 | -0.290713 | -4.271911 |
| 6 | 4.209433 | 1.141000  | -4.127820 |
| 6 | 4.277317 | -1.765258 | 3.703077  |
| 6 | 4.128554 | -2.936981 | 2.861658  |
| 6 | 3.961964 | 3.434279  | -2.453509 |

|   |           |           |           |
|---|-----------|-----------|-----------|
| 6 | 3.849495  | 4.038878  | -1.139154 |
| 6 | 3.805054  | -4.134409 | 0.294193  |
| 6 | 3.639273  | -4.016917 | -1.145897 |
| 6 | 3.620437  | 3.822004  | 1.695087  |
| 6 | 3.505380  | 3.009152  | 2.897677  |
| 6 | 3.321065  | -2.421499 | -3.485866 |
| 6 | 3.175336  | -1.115883 | -4.115890 |
| 6 | 3.253545  | 0.455919  | 4.136953  |
| 6 | 3.114903  | -0.986185 | 4.025495  |
| 6 | 2.907342  | 1.713233  | -3.900551 |
| 6 | 2.783786  | 2.906616  | -3.081913 |
| 6 | 2.813187  | -3.335563 | 2.430484  |
| 6 | 2.651733  | -3.975880 | 1.141878  |
| 6 | 2.551028  | 4.158721  | -0.524790 |
| 6 | 2.437347  | 4.083633  | 0.915603  |
| 6 | 2.320285  | -3.820999 | -1.691578 |
| 6 | 2.159653  | -3.043525 | -2.898998 |
| 6 | 2.199440  | 2.552526  | 3.316153  |
| 6 | 2.073794  | 1.278570  | 3.980970  |
| 6 | 1.860660  | -0.521407 | -4.207523 |
| 6 | 1.725384  | 0.912959  | -4.141120 |
| 6 | 1.796313  | -1.562538 | 3.854157  |
| 6 | 1.645868  | -2.772879 | 3.083881  |
| 6 | 1.475034  | 3.310907  | -2.606313 |
| 6 | 1.358797  | 3.979905  | -1.332727 |
| 6 | 1.321218  | -4.107390 | 0.575745  |
| 6 | 1.155249  | -4.069870 | -0.858854 |
| 6 | 1.126889  | 3.908326  | 1.516750  |
| 6 | 1.010548  | 3.168592  | 2.755669  |
| 6 | 0.833066  | -2.602642 | -3.290997 |
| 6 | 0.684578  | -1.344524 | -3.993821 |
| 6 | 0.760045  | 0.687581  | 4.147881  |
| 6 | 0.624091  | -0.758043 | 4.128526  |
| 6 | 0.412715  | 1.497683  | -3.950367 |
| 6 | 0.289384  | 2.739733  | -3.206882 |
| 6 | 0.325241  | -3.198707 | 2.676433  |
| 6 | 0.164701  | -3.912384 | 1.418529  |
| 6 | 0.056226  | 4.134677  | -0.725464 |
| 6 | -0.056228 | 4.134710  | 0.725274  |
| 6 | -0.164702 | -3.912447 | -1.418349 |
| 6 | -0.325241 | -3.198827 | -2.676285 |
| 6 | -0.289384 | 2.739877  | 3.206756  |
| 6 | -0.412714 | 1.497861  | 3.950298  |
| 6 | -0.624089 | -0.758229 | -4.128491 |
| 6 | -0.760043 | 0.687393  | -4.147913 |
| 6 | -0.684576 | -1.344344 | 3.993884  |
| 6 | -0.833065 | -2.602494 | 3.291118  |
| 6 | -1.010548 | 3.168468  | -2.755816 |
| 6 | -1.126891 | 3.908258  | -1.516930 |
| 6 | -1.155250 | -4.069831 | 0.859041  |
| 6 | -1.321219 | -4.107414 | -0.575557 |
| 6 | -1.358799 | 3.979962  | 1.332545  |
| 6 | -1.475035 | 3.311023  | 2.606161  |
| 6 | -1.645867 | -2.773016 | -3.083753 |
| 6 | -1.796312 | -1.562712 | -3.854086 |
| 6 | -1.725383 | 0.913146  | 4.141080  |
| 6 | -1.860659 | -0.521217 | 4.207550  |
| 6 | -2.073793 | 1.278390  | -3.981032 |
| 6 | -2.199439 | 2.552377  | -3.316272 |
| 6 | -2.159652 | -3.043395 | 2.899139  |
| 6 | -2.320286 | -3.820921 | 1.691755  |
| 6 | -2.437348 | 4.083590  | -0.915791 |
| 6 | -2.551030 | 4.158741  | 0.524600  |
| 6 | -2.651734 | -3.975929 | -1.141695 |
| 6 | -2.813187 | -3.335670 | -2.430331 |
| 6 | -2.783786 | 2.906753  | 3.081780  |
| 6 | -2.907342 | 1.713408  | 3.900474  |
| 6 | -3.114902 | -0.986367 | -4.025452 |
| 6 | -3.253544 | 0.455732  | -4.136978 |
| 6 | -3.175334 | -1.115698 | 4.115946  |

|   |           |           |           |
|---|-----------|-----------|-----------|
| 6 | -3.321064 | -2.421342 | 3.485981  |
| 6 | -3.505380 | 3.009021  | -2.897818 |
| 6 | -3.620438 | 3.821926  | -1.695264 |
| 6 | -3.639274 | -4.016862 | 1.146082  |
| 6 | -3.805055 | -4.134417 | -0.294003 |
| 6 | -3.849496 | 4.038924  | 1.138968  |
| 6 | -3.961965 | 3.434386  | 2.453351  |
| 6 | -4.128554 | -2.937107 | -2.861524 |
| 6 | -4.277317 | -1.765424 | -3.702998 |
| 6 | -4.209432 | 1.141185  | 4.127771  |
| 6 | -4.340285 | -0.290521 | 4.271930  |
| 6 | -4.557754 | 1.054083  | -4.007327 |
| 6 | -4.682137 | 2.362894  | -3.410772 |
| 6 | -4.635042 | -2.876397 | 3.112469  |
| 6 | -4.795524 | -3.710421 | 1.952427  |
| 6 | -4.921215 | 4.014002  | -1.101448 |
| 6 | -5.035684 | 4.160335  | 0.322454  |
| 6 | -5.128837 | -4.017328 | -0.860679 |
| 6 | -5.290725 | -3.450158 | -2.168318 |
| 6 | -5.271864 | 3.041599  | 2.940837  |
| 6 | -5.400287 | 1.916643  | 3.828435  |
| 6 | -5.598990 | -1.193778 | -3.892278 |
| 6 | -5.745263 | 0.222027  | -4.100562 |
| 6 | -5.669208 | -0.889016 | 4.212810  |
| 6 | -5.813995 | -2.223175 | 3.668291  |
| 6 | -6.004620 | 2.838359  | -3.017992 |
| 6 | -6.122302 | 3.713074  | -1.868331 |
| 6 | -6.133146 | -3.939293 | 1.422910  |
| 6 | -6.300831 | -4.135597 | -0.004063 |
| 6 | -6.349974 | 4.080261  | 0.940220  |
| 6 | -6.454692 | 3.551609  | 2.286294  |
| 6 | -6.622514 | -3.087247 | -2.624595 |
| 6 | -6.764888 | -1.968990 | -3.537297 |
| 6 | -6.719288 | 1.387584  | 4.143797  |
| 6 | -6.837883 | -0.074746 | 4.409426  |
| 6 | -7.068015 | 0.826811  | -4.069536 |
| 6 | -7.183361 | 2.221822  | -3.560886 |
| 6 | -7.122927 | -2.745569 | 3.383648  |
| 6 | -7.282892 | -3.671017 | 2.241973  |
| 6 | -7.419435 | 3.995369  | -1.311336 |
| 6 | -7.534617 | 4.216027  | 0.140439  |
| 6 | -7.618606 | -4.107901 | -0.580537 |
| 6 | -7.782587 | -3.599142 | -1.950699 |
| 6 | -7.748325 | 3.213329  | 2.823641  |
| 6 | -7.847987 | 2.167158  | 3.795016  |
| 6 | -8.071797 | -1.419801 | -3.797054 |
| 6 | -8.192990 | -0.032879 | -4.121255 |
| 6 | -8.102477 | -0.752671 | 4.448391  |
| 6 | -8.240073 | -2.052958 | 3.966274  |
| 6 | -8.446952 | 2.812382  | -3.211460 |
| 6 | -8.561377 | 3.682220  | -2.132086 |
| 6 | -8.572233 | -4.003575 | 1.689590  |
| 6 | -8.733269 | -4.228668 | 0.329418  |
| 6 | -8.811710 | 4.188224  | 0.829454  |
| 6 | -8.917202 | 3.722671  | 2.125924  |
| 6 | -9.081887 | -3.250499 | -2.499546 |
| 6 | -9.223828 | -2.215512 | -3.401753 |
| 1 | 10.224834 | -1.893202 | 3.720708  |
| 1 | 9.977982  | -3.749384 | 2.108684  |
| 1 | 9.905713  | 3.602828  | -2.590813 |
| 1 | 9.724254  | 4.438816  | -0.273479 |
| 1 | 9.746546  | -4.356234 | 0.072542  |
| 1 | 9.462154  | -3.956757 | -2.330272 |
| 1 | 9.560787  | 4.008832  | 1.817136  |
| 1 | 9.360333  | 2.473731  | 3.717272  |
| 1 | 9.245999  | -2.485546 | -3.889834 |
| 1 | 9.005242  | -0.198384 | -4.735786 |
| 1 | 9.203965  | 0.393046  | 4.159266  |
| 1 | 8.854079  | 1.824102  | -4.069106 |
| 1 | -8.854079 | 1.824280  | 4.069025  |

|   |            |           |           |
|---|------------|-----------|-----------|
| 1 | -9.203964  | 0.392859  | -4.159296 |
| 1 | -9.005240  | -0.198173 | 4.735809  |
| 1 | -9.245997  | -2.485373 | 3.889960  |
| 1 | -9.360332  | 2.473564  | -3.717394 |
| 1 | -9.560788  | 4.008745  | -1.817322 |
| 1 | -9.462154  | -3.956643 | 2.330456  |
| 1 | -9.746548  | -4.356222 | -0.072342 |
| 1 | -9.724257  | 4.438816  | 0.273274  |
| 1 | -9.905715  | 3.602933  | 2.590646  |
| 1 | -9.977983  | -3.749467 | -2.108509 |
| 1 | -10.224834 | -1.893365 | -3.720625 |

Nanotube (7,5) u07v06  
B3LYP/STO-3G Energy: -6790.530019

|   |           |           |           |
|---|-----------|-----------|-----------|
| 6 | -9.273259 | -1.202673 | -3.976842 |
| 6 | -9.154204 | -2.435108 | -3.368393 |
| 6 | -9.043867 | 3.115709  | 2.892736  |
| 6 | -8.912107 | 3.896790  | 1.761390  |
| 6 | -8.864366 | -4.109171 | -0.878882 |
| 6 | -8.727419 | -4.241399 | 0.495211  |
| 6 | -8.607121 | 4.164446  | -1.226434 |
| 6 | -8.475357 | 3.599530  | -2.489911 |
| 6 | -8.426897 | -2.942950 | 3.201158  |
| 6 | -8.291700 | -1.811701 | 4.002548  |
| 6 | -8.216979 | 1.080798  | -4.093548 |
| 6 | -8.109154 | -0.342882 | -4.134082 |
| 6 | -8.012012 | 1.174861  | 4.124547  |
| 6 | -7.890024 | 2.433967  | 3.456620  |
| 6 | -7.866694 | -2.925888 | -2.904547 |
| 6 | -7.731544 | -3.770069 | -1.709324 |
| 6 | -7.621502 | 4.089232  | 1.124527  |
| 6 | -7.479386 | 4.246770  | -0.332459 |
| 6 | -7.445840 | -4.074056 | 1.136013  |
| 6 | -7.302132 | -3.473628 | 2.478328  |
| 6 | -7.206943 | 3.106440  | -2.956659 |
| 6 | -7.088137 | 1.887830  | -3.803502 |
| 6 | -7.022605 | -1.158154 | 4.159513  |
| 6 | -6.892806 | 0.321849  | 4.280454  |
| 6 | -6.810010 | -0.953516 | -4.002248 |
| 6 | -6.691300 | -2.270463 | -3.405556 |
| 6 | -6.585082 | 2.888132  | 3.047045  |
| 6 | -6.453045 | 3.743711  | 1.883690  |
| 6 | -6.424954 | -3.959333 | -1.137575 |
| 6 | -6.282867 | -4.136532 | 0.295036  |
| 6 | -6.173107 | 4.105723  | -0.920538 |
| 6 | -6.036740 | 3.552765  | -2.253598 |
| 6 | -5.996113 | -3.054254 | 2.909174  |
| 6 | -5.854849 | -1.905291 | 3.779852  |
| 6 | -5.768662 | 1.298155  | -3.964990 |
| 6 | -5.633908 | -0.124909 | -4.124890 |
| 6 | -5.566293 | 0.902440  | 4.133816  |
| 6 | -5.416972 | 2.216708  | 3.568323  |
| 6 | -5.370889 | -2.751887 | -3.035178 |
| 6 | -5.237025 | -3.637051 | -1.915257 |
| 6 | -5.127125 | 3.968148  | 1.329887  |
| 6 | -4.985997 | 4.189654  | -0.081139 |
| 6 | -4.954178 | -4.062959 | 0.887658  |
| 6 | -4.810675 | -3.554066 | 2.223640  |
| 6 | -4.708686 | 3.179661  | -2.730567 |
| 6 | -4.578579 | 2.066661  | -3.638675 |
| 6 | -4.524052 | -1.353605 | 4.011164  |
| 6 | -4.384175 | 0.065086  | 4.242245  |
| 6 | -4.318364 | -0.739317 | -4.065128 |
| 6 | -4.192194 | -2.088722 | -3.553032 |
| 6 | -4.096203 | 2.710503  | 3.220998  |
| 6 | -3.956711 | 3.631867  | 2.109217  |
| 6 | -3.923705 | -3.909507 | -1.375314 |



|   |           |           |           |
|---|-----------|-----------|-----------|
| 6 | -3.784182 | -4.165392 | 0.048582  |
| 6 | -3.674025 | 4.144501  | -0.681478 |
| 6 | -3.538556 | 3.663451  | -2.048789 |
| 6 | -3.500330 | -3.221744 | 2.722621  |
| 6 | -3.359946 | -2.121831 | 3.667564  |
| 6 | -3.274216 | 1.508728  | -3.894124 |
| 6 | -3.145379 | 0.084961  | -4.155556 |
| 6 | -3.075394 | 0.665032  | 4.192092  |
| 6 | -2.932122 | 2.028546  | 3.712088  |
| 6 | -2.887428 | -2.599586 | -3.218208 |
| 6 | -2.754301 | -3.552313 | -2.135177 |
| 6 | -2.646863 | 3.895563  | 1.569435  |
| 6 | -2.505978 | 4.189760  | 0.159624  |
| 6 | -2.474696 | -4.128920 | 0.648116  |
| 6 | -2.332364 | -3.684943 | 2.016421  |
| 6 | -2.227314 | 3.315673  | -2.545751 |
| 6 | -2.094539 | 2.251464  | -3.510337 |
| 6 | -2.044624 | -1.582337 | 3.929451  |
| 6 | -1.901779 | -0.180439 | 4.236700  |
| 6 | -1.834314 | -0.529518 | -4.114745 |
| 6 | -1.705541 | -1.898952 | -3.682679 |
| 6 | -1.613376 | 2.530834  | 3.379448  |
| 6 | -1.470859 | 3.505169  | 2.324984  |
| 6 | -1.435854 | -3.838106 | -1.599149 |
| 6 | -1.296425 | -4.168755 | -0.201260 |
| 6 | -1.184631 | 4.161379  | -0.443205 |
| 6 | -1.046485 | 3.757892  | -1.824763 |
| 6 | -1.010294 | -3.369465 | 2.528505  |
| 6 | -0.868461 | -2.333505 | 3.530109  |
| 6 | -0.779523 | 1.708309  | -3.796624 |
| 6 | -0.651485 | 0.307411  | -4.147940 |
| 6 | -0.582780 | 0.422073  | 4.224521  |
| 6 | -0.440819 | 1.813053  | 3.831428  |
| 6 | -0.393898 | -2.430281 | -3.376809 |
| 6 | -0.261512 | -3.445673 | -2.345352 |
| 6 | -0.156184 | 3.801911  | 1.801753  |
| 6 | -0.015510 | 4.172770  | 0.401556  |
| 6 | 0.015515  | -4.172753 | 0.401715  |
| 6 | 0.156187  | -3.801839 | 1.801898  |
| 6 | 0.261514  | 3.445582  | -2.345482 |
| 6 | 0.393898  | 2.430151  | -3.376901 |
| 6 | 0.440814  | -1.812904 | 3.831498  |
| 6 | 0.582773  | -0.421909 | 4.224540  |
| 6 | 0.651482  | -0.307570 | -4.147931 |
| 6 | 0.779521  | -1.708455 | -3.796563 |
| 6 | 0.868458  | 2.333642  | 3.530023  |
| 6 | 1.010295  | 3.369562  | 2.528379  |
| 6 | 1.046489  | -3.757958 | -1.824621 |
| 6 | 1.184635  | -4.161390 | -0.443046 |
| 6 | 1.296430  | 4.168743  | -0.201418 |
| 6 | 1.435858  | 3.838040  | -1.599294 |
| 6 | 1.470860  | -3.505074 | 2.325118  |
| 6 | 1.613373  | -2.530701 | 3.379547  |
| 6 | 1.705539  | 1.898810  | -3.682754 |
| 6 | 1.834310  | 0.529361  | -4.114771 |
| 6 | 1.901772  | 0.180603  | 4.236702  |
| 6 | 2.044619  | 1.582489  | 3.929399  |
| 6 | 2.094537  | -2.251598 | -3.510257 |
| 6 | 2.227316  | -3.315766 | -2.545627 |
| 6 | 2.332366  | 3.685016  | 2.016283  |
| 6 | 2.474701  | 4.128936  | 0.647960  |
| 6 | 2.505983  | -4.189742 | 0.159784  |
| 6 | 2.646866  | -3.895492 | 1.569584  |
| 6 | 2.754304  | 3.552224  | -2.135312 |
| 6 | 2.887428  | 2.599459  | -3.218310 |
| 6 | 2.932118  | -2.028400 | 3.712174  |
| 6 | 3.075388  | -0.664870 | 4.192130  |
| 6 | 3.145376  | -0.085121 | -4.155564 |
| 6 | 3.274214  | -1.508876 | -3.894077 |
| 6 | 3.359943  | 2.121971  | 3.667495  |

|   |            |           |           |
|---|------------|-----------|-----------|
| 6 | 3.500330   | 3.221844  | 2.722504  |
| 6 | 3.538559   | -3.663520 | -2.048651 |
| 6 | 3.674030   | -4.144512 | -0.681319 |
| 6 | 3.784188   | 4.165378  | 0.048425  |
| 6 | 3.923710   | 3.909440  | -1.375462 |
| 6 | 3.956712   | -3.631774 | 2.109358  |
| 6 | 4.096201   | -2.710374 | 3.221109  |
| 6 | 4.192193   | 2.088584  | -3.553121 |
| 6 | 4.318360   | 0.739161  | -4.065172 |
| 6 | 4.384169   | -0.064922 | 4.242267  |
| 6 | 4.524047   | 1.353760  | 4.011131  |
| 6 | 4.578578   | -2.066799 | -3.638608 |
| 6 | 4.708688   | -3.179758 | -2.730451 |
| 6 | 4.810677   | 3.554139  | 2.223509  |
| 6 | 4.954183   | 4.062973  | 0.887505  |
| 6 | 4.986001   | -4.189636 | -0.080979 |
| 6 | 5.127128   | -3.968078 | 1.330040  |
| 6 | 5.237029   | 3.636962  | -1.915395 |
| 6 | 5.370889   | 2.751763  | -3.035289 |
| 6 | 5.416969   | -2.216566 | 3.568422  |
| 6 | 5.566287   | -0.902280 | 4.133874  |
| 6 | 5.633904   | 0.124751  | -4.124917 |
| 6 | 5.768659   | -1.298307 | -3.964960 |
| 6 | 5.854845   | 1.905435  | 3.779800  |
| 6 | 5.996113   | 3.054356  | 2.909068  |
| 6 | 6.036742   | -3.552837 | -2.253466 |
| 6 | 6.173112   | -4.105735 | -0.920381 |
| 6 | 6.282873   | 4.136515  | 0.294880  |
| 6 | 6.424960   | 3.959264  | -1.137725 |
| 6 | 6.453047   | -3.743619 | 1.883836  |
| 6 | 6.585080   | -2.888006 | 3.047166  |
| 6 | 6.691299   | 2.270328  | -3.405657 |
| 6 | 6.810006   | 0.953362  | -4.002310 |
| 6 | 6.892800   | -0.321685 | 4.280498  |
| 6 | 7.022599   | 1.158313  | 4.159500  |
| 6 | 7.088135   | -1.887975 | -3.803451 |
| 6 | 7.206944   | -3.106544 | -2.956550 |
| 6 | 7.302134   | 3.473706  | 2.478204  |
| 6 | 7.445846   | 4.074068  | 1.135860  |
| 6 | 7.479391   | -4.246754 | -0.332296 |
| 6 | 7.621506   | -4.089162 | 1.124686  |
| 6 | 7.731549   | 3.769977  | -1.709469 |
| 6 | 7.866695   | 2.925765  | -2.904670 |
| 6 | 7.890020   | -2.433828 | 3.456732  |
| 6 | 8.012006   | -1.174702 | 4.124624  |
| 6 | 8.109149   | 0.342724  | -4.134131 |
| 6 | 8.216975   | -1.080956 | -4.093541 |
| 6 | 8.291695   | 1.811852  | 4.002512  |
| 6 | 8.426896   | 2.943062  | 3.201066  |
| 6 | 8.475358   | -3.599611 | -2.489779 |
| 6 | 8.607125   | -4.164466 | -1.226274 |
| 6 | 8.727425   | 4.241375  | 0.495050  |
| 6 | 8.864372   | 4.109097  | -0.879037 |
| 6 | 8.912109   | -3.896696 | 1.761545  |
| 6 | 9.043865   | -3.115583 | 2.892869  |
| 6 | 9.154203   | 2.434972  | -3.368510 |
| 6 | 9.273254   | 1.202520  | -3.976927 |
| 1 | -10.265982 | -0.799671 | -4.220949 |
| 1 | -10.059806 | -3.009793 | -3.135093 |
| 1 | -10.041342 | 2.889732  | 3.294637  |
| 1 | -9.812689  | 4.290246  | 1.272533  |
| 1 | -9.870430  | -4.120682 | -1.317295 |
| 1 | -9.628385  | -4.352755 | 1.112232  |
| 1 | -9.610843  | 4.409471  | -0.856240 |
| 1 | -9.379724  | 3.410918  | -3.082842 |
| 1 | -9.433140  | -3.332796 | 3.000575  |
| 1 | -9.196407  | -1.341268 | 4.409058  |
| 1 | -9.224616  | 1.512586  | -4.039537 |
| 1 | -9.024362  | 0.781830  | 4.284648  |
| 1 | 9.024356   | -0.781665 | 4.284714  |

|   |           |           |           |
|---|-----------|-----------|-----------|
| 1 | 9.224611  | -1.512741 | -4.039520 |
| 1 | 9.196399  | 1.341438  | 4.409049  |
| 1 | 9.433138  | 3.332898  | 3.000470  |
| 1 | 9.379725  | -3.411026 | -3.082719 |
| 1 | 9.610852  | -4.409468 | -0.856066 |
| 1 | 9.628393  | 4.352748  | 1.112067  |
| 1 | 9.870440  | 4.120581  | -1.317450 |
| 1 | 9.812693  | -4.290165 | 1.272701  |
| 1 | 10.041339 | -2.889595 | 3.294766  |
| 1 | 10.059805 | 3.009665  | -3.135231 |
| 1 | 10.265976 | 0.799513  | -4.221029 |

Nanotube (7,5) u07v07  
B3LYP/STO-3G Energy: -6865.828727

|   |          |           |           |
|---|----------|-----------|-----------|
| 6 | 9.449198 | 0.174150  | -4.024864 |
| 6 | 9.319436 | 1.520315  | -3.754945 |
| 6 | 9.095093 | -2.235183 | 3.715571  |
| 6 | 8.985036 | -3.280753 | 2.820995  |
| 6 | 8.985662 | 3.774442  | -1.782923 |
| 6 | 8.823826 | 4.254296  | -0.492045 |
| 6 | 8.735374 | -4.308581 | -0.002672 |
| 6 | 8.626111 | -4.088000 | -1.370193 |
| 6 | 8.471955 | 3.694482  | 2.450761  |
| 6 | 8.320998 | 2.806655  | 3.512542  |
| 6 | 8.394980 | -2.067222 | -3.570384 |
| 6 | 8.287617 | -0.702862 | -3.975969 |
| 6 | 8.038771 | -0.049399 | 4.389692  |
| 6 | 7.929953 | -1.437187 | 4.064820  |
| 6 | 8.023333 | 2.107955  | -3.454499 |
| 6 | 7.867279 | 3.229416  | -2.519039 |
| 6 | 7.705854 | -3.637453 | 2.231788  |
| 6 | 7.590806 | -4.164771 | 0.863102  |
| 6 | 7.529831 | 4.252937  | 0.147119  |
| 6 | 7.360688 | 4.017097  | 1.595164  |
| 6 | 7.365014 | -3.738290 | -1.970185 |
| 6 | 7.260695 | -2.778601 | -3.102581 |
| 6 | 7.048094 | 2.209350  | 3.808457  |
| 6 | 6.915820 | 0.809614  | 4.301861  |
| 6 | 6.986000 | -0.084621 | -4.027862 |
| 6 | 6.856944 | 1.341002  | -3.791331 |
| 6 | 6.632861 | -1.988618 | 3.762856  |
| 6 | 6.523283 | -3.115598 | 2.856480  |
| 6 | 6.550722 | 3.554995  | -2.038995 |
| 6 | 6.382798 | 4.093971  | -0.702617 |
| 6 | 6.295468 | -4.188238 | 0.235716  |
| 6 | 6.183019 | -3.996512 | -1.197155 |
| 6 | 6.046801 | 3.717463  | 2.095769  |
| 6 | 5.888411 | 2.828954  | 3.229015  |
| 6 | 5.944612 | -2.256025 | -3.432427 |
| 6 | 5.812537 | -0.921957 | -3.953640 |
| 6 | 5.593100 | 0.203939  | 4.284180  |
| 6 | 5.455184 | -1.212008 | 4.072291  |
| 6 | 5.530442 | 1.895648  | -3.579709 |
| 6 | 5.377071 | 3.038531  | -2.728286 |
| 6 | 5.208452 | -3.482245 | 2.355444  |
| 6 | 5.093695 | -4.059817 | 1.047421  |
| 6 | 5.043529 | 4.169798  | -0.134762 |
| 6 | 4.874865 | 4.019659  | 1.283399  |
| 6 | 4.863541 | -3.763793 | -1.776627 |
| 6 | 4.748925 | -2.920786 | -2.939903 |
| 6 | 4.553019 | 2.347376  | 3.568052  |
| 6 | 4.408426 | 1.035403  | 4.150924  |
| 6 | 4.495487 | -0.318470 | -4.075021 |
| 6 | 4.360464 | 1.116042  | -3.929389 |
| 6 | 4.140697 | -1.785500 | 3.838938  |
| 6 | 4.022716 | -2.962447 | 3.001230  |
| 6 | 4.053859 | 3.436040  | -2.300206 |

|   |           |           |           |
|---|-----------|-----------|-----------|
| 6 | 3.888766  | 4.049579  | -0.993454 |
| 6 | 3.791904  | -4.178199 | 0.432395  |
| 6 | 3.680933  | -4.064091 | -1.013931 |
| 6 | 3.554474  | 3.820974  | 1.827189  |
| 6 | 3.395178  | 2.997783  | 3.018308  |
| 6 | 3.448338  | -2.452836 | -3.352086 |
| 6 | 3.324057  | -1.143618 | -3.971036 |
| 6 | 3.100217  | 0.436010  | 4.231863  |
| 6 | 2.966770  | -1.006213 | 4.116604  |
| 6 | 3.050026  | 1.690624  | -3.760475 |
| 6 | 2.898318  | 2.890606  | -2.962833 |
| 6 | 2.723398  | -3.365209 | 2.525451  |
| 6 | 2.609231  | -4.014009 | 1.236332  |
| 6 | 2.569112  | 4.164714  | -0.428405 |
| 6 | 2.401109  | 4.084859  | 1.005361  |
| 6 | 2.379151  | -3.862022 | -1.606269 |
| 6 | 2.263094  | -3.078605 | -2.812223 |
| 6 | 2.075577  | 2.536254  | 3.383815  |
| 6 | 1.926615  | 1.258133  | 4.035029  |
| 6 | 2.012624  | -0.544908 | -4.110609 |
| 6 | 1.876449  | 0.888904  | -4.047859 |
| 6 | 1.655664  | -1.584338 | 3.899763  |
| 6 | 1.533841  | -2.798859 | 3.132231  |
| 6 | 1.570832  | 3.300208  | -2.542004 |
| 6 | 1.406570  | 3.980513  | -1.280538 |
| 6 | 1.299536  | -4.148441 | 0.622833  |
| 6 | 1.186099  | -4.111705 | -0.816516 |
| 6 | 1.069201  | 3.904522  | 1.556783  |
| 6 | 0.907027  | 3.155871  | 2.783477  |
| 6 | 0.952373  | -2.631554 | -3.248808 |
| 6 | 0.830141  | -1.367622 | -3.947195 |
| 6 | 0.607005  | 0.665069  | 4.149880  |
| 6 | 0.473069  | -0.778938 | 4.126553  |
| 6 | 0.559148  | 1.475691  | -3.911656 |
| 6 | 0.409192  | 2.723238  | -3.181770 |
| 6 | 0.228043  | -3.229463 | 2.679988  |
| 6 | 0.113934  | -3.950230 | 1.422580  |
| 6 | 0.083676  | 4.137096  | -0.722930 |
| 6 | -0.083677 | 4.137083  | 0.723011  |
| 6 | -0.113936 | -3.950203 | -1.422669 |
| 6 | -0.228044 | -3.229412 | -2.680063 |
| 6 | -0.409191 | 2.723178  | 3.181823  |
| 6 | -0.559147 | 1.475614  | 3.911683  |
| 6 | -0.473068 | -0.778857 | -4.126577 |
| 6 | -0.607004 | 0.665151  | -4.149872 |
| 6 | -0.830139 | -1.367700 | 3.947159  |
| 6 | -0.952372 | -2.631616 | 3.248746  |
| 6 | -0.907027 | 3.155924  | -2.783415 |
| 6 | -1.069202 | 3.904550  | -1.556707 |
| 6 | -1.186101 | -4.111719 | 0.816424  |
| 6 | -1.299539 | -4.148428 | -0.622925 |
| 6 | -1.406571 | 3.980488  | 1.280616  |
| 6 | -1.570832 | 3.300159  | 2.542070  |
| 6 | -1.533843 | -2.798797 | -3.132297 |
| 6 | -1.655665 | -1.584260 | -3.899805 |
| 6 | -1.876447 | 0.888824  | 4.047875  |
| 6 | -2.012621 | -0.544989 | 4.110594  |
| 6 | -1.926615 | 1.258213  | -4.035008 |
| 6 | -2.075577 | 2.536319  | -3.383767 |
| 6 | -2.263093 | -3.078658 | 2.812153  |
| 6 | -2.379151 | -3.862050 | 1.606183  |
| 6 | -2.401110 | 4.084876  | -1.005280 |
| 6 | -2.569114 | 4.164703  | 0.428487  |
| 6 | -2.609233 | -4.013982 | -1.236421 |
| 6 | -2.723401 | -3.365157 | -2.525527 |
| 6 | -2.898317 | 2.890548  | 2.962892  |
| 6 | -3.050024 | 1.690550  | 3.760510  |
| 6 | -2.966771 | -1.006130 | -4.116633 |
| 6 | -3.100218 | 0.436096  | -4.231861 |
| 6 | -3.324052 | -1.143697 | 3.971012  |

|   |           |           |           |
|---|-----------|-----------|-----------|
| 6 | -3.448335 | -2.452900 | 3.352032  |
| 6 | -3.395178 | 2.997841  | -3.018250 |
| 6 | -3.554474 | 3.821007  | -1.827113 |
| 6 | -3.680934 | -4.064105 | 1.013844  |
| 6 | -3.791906 | -4.178185 | -0.432484 |
| 6 | -3.888767 | 4.049556  | 0.993535  |
| 6 | -4.053859 | 3.435992  | 2.300276  |
| 6 | -4.022720 | -2.962384 | -3.001295 |
| 6 | -4.140700 | -1.785421 | -3.838981 |
| 6 | -4.360461 | 1.115963  | 3.929416  |
| 6 | -4.495482 | -0.318552 | 4.075019  |
| 6 | -4.408426 | 1.035488  | -4.150910 |
| 6 | -4.553019 | 2.347448  | -3.568009 |
| 6 | -4.748922 | -2.920843 | 2.939843  |
| 6 | -4.863540 | -3.763823 | 1.776549  |
| 6 | -4.874866 | 4.019680  | -1.283318 |
| 6 | -5.043531 | 4.169789  | 0.134847  |
| 6 | -5.093698 | -4.059788 | -1.047505 |
| 6 | -5.208456 | -3.482192 | -2.355517 |
| 6 | -5.377070 | 3.038473  | 2.728350  |
| 6 | -5.530440 | 1.895574  | 3.579752  |
| 6 | -5.455187 | -1.211923 | -4.072321 |
| 6 | -5.593102 | 0.204029  | -4.284183 |
| 6 | -5.812530 | -0.922039 | 3.953631  |
| 6 | -5.944607 | -2.256095 | 3.432388  |
| 6 | -5.888412 | 2.829021  | -3.228962 |
| 6 | -6.046802 | 3.717503  | -2.095695 |
| 6 | -6.183020 | -3.996529 | 1.197076  |
| 6 | -6.295470 | -4.188225 | -0.235800 |
| 6 | -6.382799 | 4.093947  | 0.702701  |
| 6 | -6.550723 | 3.554946  | 2.039069  |
| 6 | -6.523287 | -3.115533 | -2.856543 |
| 6 | -6.632865 | -1.988536 | -3.762898 |
| 6 | -6.856939 | 1.340922  | 3.791369  |
| 6 | -6.985994 | -0.084706 | 4.027877  |
| 6 | -6.915821 | 0.809706  | -4.301852 |
| 6 | -7.048095 | 2.209432  | -3.808419 |
| 6 | -7.260691 | -2.778665 | 3.102537  |
| 6 | -7.365012 | -3.738324 | 1.970115  |
| 6 | -7.360689 | 4.017122  | -1.595082 |
| 6 | -7.529833 | 4.252929  | -0.147031 |
| 6 | -7.590809 | -4.164744 | -0.863184 |
| 6 | -7.705859 | -3.637398 | -2.231858 |
| 6 | -7.867279 | 3.229356  | 2.519109  |
| 6 | -8.023331 | 2.107880  | 3.454553  |
| 6 | -7.929957 | -1.437097 | -4.064849 |
| 6 | -8.038774 | -0.049303 | -4.389697 |
| 6 | -8.287609 | -0.702949 | 3.975982  |
| 6 | -8.394975 | -2.067298 | 3.570364  |
| 6 | -8.320999 | 2.806730  | -3.512491 |
| 6 | -8.471956 | 3.694529  | -2.450685 |
| 6 | -8.626110 | -4.088021 | 1.370117  |
| 6 | -8.735376 | -4.308572 | 0.002591  |
| 6 | -8.823827 | 4.254270  | 0.492132  |
| 6 | -8.985664 | 3.774390  | 1.783002  |
| 6 | -8.985043 | -3.280683 | -2.821055 |
| 6 | -9.095098 | -2.235097 | -3.715612 |
| 6 | -9.319430 | 1.520233  | 3.755000  |
| 6 | -9.449189 | 0.174063  | 4.024901  |
| 1 | 10.445851 | -0.273563 | -4.141365 |
| 1 | 10.220530 | 2.140212  | -3.662116 |
| 1 | 10.084400 | -1.908798 | 4.064897  |
| 1 | 9.894533  | -3.782665 | 2.466307  |
| 1 | 9.999280  | 3.677130  | -2.191978 |
| 1 | 9.713229  | 4.524066  | 0.091940  |
| 1 | 9.731979  | -4.445713 | 0.435767  |
| 1 | 9.540555  | -4.053988 | -1.976506 |
| 1 | 9.481630  | 4.025144  | 2.175685  |
| 1 | 9.217200  | 2.460883  | 4.043837  |
| 1 | 9.401627  | -2.466568 | -3.390520 |

|   |            |           |           |
|---|------------|-----------|-----------|
| 1 | 9.047630   | 0.377162  | 4.462942  |
| 1 | -9.047628  | 0.377259  | -4.462944 |
| 1 | -9.401645  | -2.466634 | 3.390463  |
| 1 | -9.217201  | 2.460972  | -4.043794 |
| 1 | -9.481629  | 4.025181  | -2.175600 |
| 1 | -9.540552  | -4.054025 | 1.976433  |
| 1 | -9.731983  | -4.445699 | -0.435851 |
| 1 | -9.713231  | 4.524048  | -0.091849 |
| 1 | -9.999284  | 3.677062  | 2.192054  |
| 1 | -9.894540  | -3.782600 | -2.466373 |
| 1 | -10.084400 | -1.908710 | -4.064937 |
| 1 | -10.220527 | 2.140129  | 3.662187  |
| 1 | -10.445844 | -0.273649 | 4.141402  |

Nanotube (7,5) u07v08  
B3LYP/STO-3G Energy: -6941.127044

|   |           |           |           |
|---|-----------|-----------|-----------|
| 6 | -9.478696 | -4.072452 | -0.862644 |
| 6 | -9.347051 | -4.154605 | 0.507091  |
| 6 | -9.273391 | 4.042394  | -1.207097 |
| 6 | -9.152949 | 3.447283  | -2.446318 |
| 6 | -9.039401 | -2.817424 | 3.190395  |
| 6 | -8.899395 | -1.689697 | 3.983864  |
| 6 | -8.860452 | 0.983077  | -4.160025 |
| 6 | -8.726330 | -0.392609 | -4.297322 |
| 6 | -8.603447 | 1.305236  | 4.196328  |
| 6 | -8.474820 | 2.561550  | 3.611855  |
| 6 | -8.444967 | -3.034503 | -2.911001 |
| 6 | -8.322537 | -3.775295 | -1.698100 |
| 6 | -8.219192 | 4.149743  | 1.078633  |
| 6 | -8.110548 | 4.194258  | -0.345207 |
| 6 | -8.053261 | -3.987870 | 1.152191  |
| 6 | -7.909445 | -3.368169 | 2.474678  |
| 6 | -7.865188 | 2.989990  | -2.941405 |
| 6 | -7.729651 | 1.804281  | -3.800741 |
| 6 | -7.616650 | -1.046501 | 4.146490  |
| 6 | -7.475018 | 0.415624  | 4.289762  |
| 6 | -7.452325 | -1.039337 | -4.115054 |
| 6 | -7.322599 | -2.377873 | -3.479208 |
| 6 | -7.208762 | 3.024680  | 3.112041  |
| 6 | -7.090746 | 3.863501  | 1.886858  |
| 6 | -7.016601 | -3.959564 | -1.114390 |
| 6 | -6.884543 | -4.094546 | 0.324300  |
| 6 | -6.810691 | 4.066469  | -0.955520 |
| 6 | -6.691004 | 3.481161  | -2.277360 |
| 6 | -6.600453 | -2.962824 | 2.913171  |
| 6 | -6.455015 | -1.805934 | 3.776908  |
| 6 | -6.423944 | 1.227541  | -3.986023 |
| 6 | -6.285811 | -0.204543 | -4.168355 |
| 6 | -6.171616 | 1.000912  | 4.131217  |
| 6 | -6.037005 | 2.327332  | 3.563537  |
| 6 | -5.998492 | -2.806604 | -3.060137 |
| 6 | -5.849553 | -3.649991 | -1.904635 |
| 6 | -5.770858 | 4.025279  | 1.297279  |
| 6 | -5.635332 | 4.186115  | -0.125509 |
| 6 | -5.559803 | -4.005531 | 0.914393  |
| 6 | -5.416990 | -3.473134 | 2.236965  |
| 6 | -5.369746 | 3.113644  | -2.760141 |
| 6 | -5.235735 | 2.000530  | -3.654185 |
| 6 | -5.126399 | -1.251213 | 3.996484  |
| 6 | -4.984330 | 0.159937  | 4.215523  |
| 6 | -4.955105 | -0.800166 | -4.093198 |
| 6 | -4.815177 | -2.137341 | -3.577118 |
| 6 | -4.709592 | 2.802363  | 3.185230  |
| 6 | -4.580302 | 3.703301  | 2.067117  |
| 6 | -4.526647 | -3.895824 | -1.352342 |
| 6 | -4.386665 | -4.119709 | 0.070337  |
| 6 | -4.318962 | 4.129743  | -0.739497 |

|   |           |           |           |
|---|-----------|-----------|-----------|
| 6 | -4.192174 | 3.624931  | -2.091624 |
| 6 | -4.099147 | -3.135501 | 2.731287  |
| 6 | -3.955728 | -2.028947 | 3.660194  |
| 6 | -3.923601 | 1.460317  | -3.928128 |
| 6 | -3.787115 | 0.035921  | -4.190147 |
| 6 | -3.673687 | 0.761178  | 4.165076  |
| 6 | -3.538974 | 2.125546  | 3.674895  |
| 6 | -3.504355 | -2.632013 | -3.232232 |
| 6 | -3.361302 | -3.562400 | -2.124617 |
| 6 | -3.275457 | 3.958581  | 1.508863  |
| 6 | -3.146345 | 4.218699  | 0.085007  |
| 6 | -3.076300 | -4.078362 | 0.668830  |
| 6 | -2.933909 | -3.613361 | 2.034179  |
| 6 | -2.886879 | 3.292088  | -2.603783 |
| 6 | -2.754299 | 2.216001  | -3.563527 |
| 6 | -2.646387 | -1.488482 | 3.919549  |
| 6 | -2.505203 | -0.079018 | 4.211863  |
| 6 | -2.474897 | -0.564732 | -4.149558 |
| 6 | -2.333290 | -1.928687 | -3.700915 |
| 6 | -2.228363 | 2.621213  | 3.323523  |
| 6 | -2.095962 | 3.579268  | 2.253478  |
| 6 | -2.044862 | -3.823914 | -1.581750 |
| 6 | -1.902224 | -4.125877 | -0.179754 |
| 6 | -1.834459 | 4.179311  | -0.529232 |
| 6 | -1.705171 | 3.752329  | -1.900089 |
| 6 | -1.613264 | -3.285619 | 2.538323  |
| 6 | -1.469623 | -2.241330 | 3.521504  |
| 6 | -1.435049 | 1.681352  | -3.852581 |
| 6 | -1.296800 | 0.284525  | -4.189252 |
| 6 | -1.184374 | 0.525060  | 4.180004  |
| 6 | -1.047034 | 1.903399  | 3.770099  |
| 6 | -1.011993 | -2.440413 | -3.381205 |
| 6 | -0.869313 | -3.432596 | -2.336956 |
| 6 | -0.780151 | 3.863865  | 1.709225  |
| 6 | -0.651886 | 4.211756  | 0.307797  |
| 6 | -0.583375 | -4.116102 | 0.422286  |
| 6 | -0.441153 | -3.730394 | 1.814113  |
| 6 | -0.393273 | 3.449106  | -2.432894 |
| 6 | -0.261571 | 2.423957  | -3.454946 |
| 6 | -0.155099 | -1.718076 | 3.819172  |
| 6 | -0.014510 | -0.319762 | 4.193214  |
| 6 | 0.014511  | -0.319153 | -4.193259 |
| 6 | 0.155100  | -1.717520 | -3.819419 |
| 6 | 0.261571  | 2.423455  | 3.455297  |
| 6 | 0.393272  | 3.448752  | 2.433394  |
| 6 | 0.441153  | -3.730131 | -1.814653 |
| 6 | 0.583375  | -4.116042 | -0.422882 |
| 6 | 0.651884  | 4.211801  | -0.307186 |
| 6 | 0.780149  | 3.864115  | -1.708664 |
| 6 | 0.869313  | -3.432936 | 2.336459  |
| 6 | 1.011994  | -2.440904 | 3.380851  |
| 6 | 1.047034  | 1.903947  | -3.769822 |
| 6 | 1.184375  | 0.525667  | -4.179926 |
| 6 | 1.296801  | 0.283917  | 4.189292  |
| 6 | 1.435050  | 1.680792  | 3.852824  |
| 6 | 1.469624  | -2.240818 | -3.521828 |
| 6 | 1.613264  | -3.285251 | -2.538799 |
| 6 | 1.705170  | 3.752053  | 1.900632  |
| 6 | 1.834457  | 4.179236  | 0.529839  |
| 6 | 1.902223  | -4.125905 | 0.179155  |
| 6 | 2.044861  | -3.824146 | 1.581195  |
| 6 | 2.095961  | 3.579597  | -2.252958 |
| 6 | 2.228362  | 2.621696  | -3.323142 |
| 6 | 2.333291  | -1.929225 | 3.700634  |
| 6 | 2.474899  | -0.565334 | 4.149475  |
| 6 | 2.505204  | -0.078406 | -4.211871 |
| 6 | 2.646388  | -1.487913 | -3.919762 |
| 6 | 2.754300  | 2.215483  | 3.563846  |
| 6 | 2.886878  | 3.291711  | 2.604259  |
| 6 | 2.933909  | -3.613067 | -2.034702 |

|   |            |           |           |
|---|------------|-----------|-----------|
| 6 | 3.076299   | -4.078268 | -0.669421 |
| 6 | 3.146343   | 4.218715  | -0.084395 |
| 6 | 3.275456   | 3.958804  | -1.508288 |
| 6 | 3.361302   | -3.562711 | 2.124100  |
| 6 | 3.504355   | -2.632484 | 3.231849  |
| 6 | 3.538975   | 2.126080  | -3.674584 |
| 6 | 3.673689   | 0.761783  | -4.164961 |
| 6 | 3.787117   | 0.035313  | 4.190148  |
| 6 | 3.923603   | 1.459747  | 3.928336  |
| 6 | 3.955729   | -2.028415 | -3.660485 |
| 6 | 4.099148   | -3.135105 | -2.731740 |
| 6 | 4.192173   | 3.624631  | 2.092150  |
| 6 | 4.318960   | 4.129642  | 0.740096  |
| 6 | 4.386664   | -4.119704 | -0.070935 |
| 6 | 4.526646   | -3.896025 | 1.351777  |
| 6 | 4.580301   | 3.703605  | -2.066579 |
| 6 | 4.709592   | 2.802828  | -3.184822 |
| 6 | 4.815178   | -2.137861 | 3.576805  |
| 6 | 4.955107   | -0.800760 | 4.093077  |
| 6 | 4.984332   | 0.160550  | -4.215495 |
| 6 | 5.126400   | -1.250632 | -3.996660 |
| 6 | 5.235736   | 2.000000  | 3.654471  |
| 6 | 5.369745   | 3.113246  | 2.760591  |
| 6 | 5.416990   | -3.472812 | -2.237467 |
| 6 | 5.559802   | -4.005403 | -0.914974 |
| 6 | 5.635330   | 4.186105  | 0.126117  |
| 6 | 5.770856   | 4.025474  | -1.296695 |
| 6 | 5.849552   | -3.650273 | 1.904106  |
| 6 | 5.998491   | -2.807050 | 3.059728  |
| 6 | 6.037005   | 2.327852  | -3.563196 |
| 6 | 6.171618   | 1.001513  | -4.131065 |
| 6 | 6.285813   | -0.205147 | 4.168317  |
| 6 | 6.423946   | 1.226963  | 3.986193  |
| 6 | 6.455016   | -1.805386 | -3.777164 |
| 6 | 6.600453   | -2.962403 | -2.913598 |
| 6 | 6.691004   | 3.480836  | 2.277863  |
| 6 | 6.810690   | 4.066340  | 0.956110  |
| 6 | 6.884542   | -4.094506 | -0.324894 |
| 6 | 7.016600   | -3.959732 | 1.113816  |
| 6 | 7.090744   | 3.863783  | -1.886298 |
| 6 | 7.208762   | 3.025135  | -3.111598 |
| 6 | 7.322599   | -2.378380 | 3.478860  |
| 6 | 7.452327   | -1.039934 | 4.114894  |
| 6 | 7.475020   | 0.416248  | -4.289692 |
| 6 | 7.616651   | -1.045898 | -4.146633 |
| 6 | 7.729653   | 1.803730  | 3.800993  |
| 6 | 7.865188   | 2.989568  | 2.941834  |
| 6 | 7.909444   | -3.367814 | -2.475164 |
| 6 | 8.053260   | -3.987711 | -1.152769 |
| 6 | 8.110546   | 4.194219  | 0.345815  |
| 6 | 8.219189   | 4.149914  | -1.078032 |
| 6 | 8.322536   | -3.775550 | 1.697553  |
| 6 | 8.444967   | -3.034932 | 2.910561  |
| 6 | 8.474820   | 2.562077  | -3.611476 |
| 6 | 8.603449   | 1.305847  | -4.196129 |
| 6 | 8.726332   | -0.393234 | 4.297251  |
| 6 | 8.860454   | 0.982473  | 4.160150  |
| 6 | 8.899395   | -1.689118 | -3.984102 |
| 6 | 9.039402   | -2.816963 | -3.190799 |
| 6 | 9.152949   | 3.446931  | 2.446813  |
| 6 | 9.273391   | 4.042226  | 1.207680  |
| 6 | 9.347049   | -4.154542 | -0.507693 |
| 6 | 9.478694   | -4.072588 | 0.862054  |
| 1 | -10.475058 | -4.091542 | -1.325598 |
| 1 | -10.246068 | -4.243971 | 1.130495  |
| 1 | -10.266825 | 4.280980  | -0.802555 |
| 1 | -10.058230 | 3.218702  | -3.023477 |
| 1 | -10.045508 | -3.208487 | 2.992234  |
| 1 | -9.797822  | -1.211662 | 4.395205  |
| 1 | -9.865197  | 1.424134  | -4.179430 |



|   |           |           |           |
|---|-----------|-----------|-----------|
| 1 | -9.629686 | -1.004165 | -4.419574 |
| 1 | -9.606630 | 0.935882  | 4.444829  |
| 1 | -9.381314 | 3.148239  | 3.414152  |
| 1 | -9.456576 | -2.777885 | -3.250793 |
| 1 | -9.227105 | 4.094298  | 1.509679  |
| 1 | 9.227101  | 4.094539  | -1.509086 |
| 1 | 9.456575  | -2.778368 | 3.250393  |
| 1 | 9.381315  | 3.148736  | -3.413687 |
| 1 | 9.606631  | 0.936529  | -4.444684 |
| 1 | 9.629688  | -1.004807 | 4.419413  |
| 1 | 9.865203  | 1.423527  | 4.179610  |
| 1 | 9.797823  | -1.211023 | -4.395373 |
| 1 | 10.045510 | -3.208055 | -2.992693 |
| 1 | 10.058230 | 3.218261  | 3.023936  |
| 1 | 10.266827 | 4.280863  | 0.803168  |
| 1 | 10.246067 | -4.243819 | -1.131108 |
| 1 | 10.475056 | -4.091746 | 1.325005  |

Nanotube (7,5) u07v09  
B3LYP/STO-3G Energy: -7016.424961

|   |          |           |           |
|---|----------|-----------|-----------|
| 6 | 9.636632 | 3.593913  | -1.910838 |
| 6 | 9.517460 | 4.027200  | -0.608196 |
| 6 | 9.304529 | -4.336904 | -0.165828 |
| 6 | 9.181714 | -4.077413 | -1.515005 |
| 6 | 9.212880 | 3.428337  | 2.329438  |
| 6 | 9.063514 | 2.544071  | 3.385420  |
| 6 | 8.912664 | -2.128104 | -3.799917 |
| 6 | 8.799049 | -0.831846 | -4.283816 |
| 6 | 8.726503 | -0.292272 | 4.356985  |
| 6 | 8.574179 | -1.653533 | 4.114660  |
| 6 | 8.570372 | 2.081641  | -3.618956 |
| 6 | 8.468992 | 3.110219  | -2.637177 |
| 6 | 8.270507 | -3.834523 | 2.075853  |
| 6 | 8.147327 | -4.241013 | 0.712723  |
| 6 | 8.226149 | 4.052048  | 0.064001  |
| 6 | 8.084423 | 3.794861  | 1.500807  |
| 6 | 7.896131 | -3.738319 | -2.104109 |
| 6 | 7.771608 | -2.810503 | -3.236891 |
| 6 | 7.772502 | 1.984056  | 3.712950  |
| 6 | 7.611366 | 0.610358  | 4.226159  |
| 6 | 7.536102 | -0.137743 | -4.267825 |
| 6 | 7.432621 | 1.320298  | -3.996023 |
| 6 | 7.296028 | -2.208662 | 3.757894  |
| 6 | 7.153709 | -3.331287 | 2.790042  |
| 6 | 7.170430 | 3.460611  | -2.115215 |
| 6 | 7.052201 | 3.962356  | -0.758725 |
| 6 | 6.843567 | -4.251725 | 0.096687  |
| 6 | 6.720521 | -4.022720 | -1.330596 |
| 6 | 6.773354 | 3.536941  | 2.034742  |
| 6 | 6.618827 | 2.642436  | 3.167118  |
| 6 | 6.473514 | -2.278191 | -3.558492 |
| 6 | 6.356515 | -0.938189 | -4.101506 |
| 6 | 6.298368 | 0.025427  | 4.230896  |
| 6 | 6.139327 | -1.399998 | 4.022948  |
| 6 | 6.119310 | 1.865220  | -3.696381 |
| 6 | 5.992789 | 2.978845  | -2.794809 |
| 6 | 5.826531 | -3.616691 | 2.268812  |
| 6 | 5.674801 | -4.133826 | 0.935454  |
| 6 | 5.731532 | 4.048584  | -0.159679 |
| 6 | 5.591993 | 3.874981  | 1.255427  |
| 6 | 5.401085 | -3.766977 | -1.884518 |
| 6 | 5.276623 | -2.918590 | -3.033103 |
| 6 | 5.284447 | 2.183707  | 3.527541  |
| 6 | 5.124253 | 0.879184  | 4.102414  |
| 6 | 5.036190 | -0.320064 | -4.175554 |
| 6 | 4.921463 | 1.105756  | -4.019501 |
| 6 | 4.801521 | -1.934110 | 3.786108  |

|   |           |           |           |
|---|-----------|-----------|-----------|
| 6 | 4.648065  | -3.087897 | 2.937134  |
| 6 | 4.677952  | 3.379640  | -2.317903 |
| 6 | 4.552780  | 3.961301  | -1.000088 |
| 6 | 4.353010  | -4.212483 | 0.334047  |
| 6 | 4.221094  | -4.068267 | -1.100435 |
| 6 | 4.272808  | 3.695831  | 1.825559  |
| 6 | 4.121569  | 2.867793  | 3.007769  |
| 6 | 3.969770  | -2.443407 | -3.430341 |
| 6 | 3.853564  | -1.133345 | -4.049602 |
| 6 | 3.804065  | 0.306717  | 4.215742  |
| 6 | 3.645127  | -1.135142 | 4.093778  |
| 6 | 3.620612  | 1.695402  | -3.808718 |
| 6 | 3.500989  | 2.880133  | -2.975497 |
| 6 | 3.333810  | -3.456145 | 2.470423  |
| 6 | 3.186690  | -4.068284 | 1.160519  |
| 6 | 3.246472  | 4.096046  | -0.405273 |
| 6 | 3.108778  | 3.997853  | 1.034594  |
| 6 | 2.916145  | -3.854770 | -1.674158 |
| 6 | 2.792006  | -3.059201 | -2.878246 |
| 6 | 2.807019  | 2.433656  | 3.404087  |
| 6 | 2.648584  | 1.149452  | 4.051057  |
| 6 | 2.551839  | -0.519893 | -4.161052 |
| 6 | 2.435651  | 0.916328  | -4.077942 |
| 6 | 2.324975  | -1.683164 | 3.889706  |
| 6 | 2.168205  | -2.880316 | 3.100658  |
| 6 | 2.193681  | 3.293737  | -2.512143 |
| 6 | 2.066936  | 3.944530  | -1.232483 |
| 6 | 1.870260  | -4.162648 | 0.563540  |
| 6 | 1.734496  | -4.096510 | -0.869648 |
| 6 | 1.787902  | 3.830343  | 1.611429  |
| 6 | 1.637718  | 3.076546  | 2.830427  |
| 6 | 1.479421  | -2.592668 | -3.288356 |
| 6 | 1.360462  | -1.329611 | -3.974116 |
| 6 | 1.318990  | 0.578955  | 4.182958  |
| 6 | 1.158122  | -0.855211 | 4.143979  |
| 6 | 1.125168  | 1.515738  | -3.894546 |
| 6 | 1.006130  | 2.742184  | -3.138238 |
| 6 | 0.842539  | -3.271969 | 2.654148  |
| 6 | 0.694644  | -3.959888 | 1.388580  |
| 6 | 0.752093  | 4.108817  | -0.641986 |
| 6 | 0.615716  | 4.092793  | 0.802107  |
| 6 | 0.421238  | -3.913897 | -1.455099 |
| 6 | 0.296466  | -3.185532 | -2.704847 |
| 6 | 0.317809  | 2.668646  | 3.259169  |
| 6 | 0.160854  | 1.417633  | 3.983575  |
| 6 | 0.057581  | -0.724180 | -4.130039 |
| 6 | -0.057581 | 0.724582  | -4.129970 |
| 6 | -0.160854 | -1.418023 | 3.983438  |
| 6 | -0.317809 | -2.668965 | 3.258911  |
| 6 | -0.296465 | 3.185796  | -2.704540 |
| 6 | -0.421238 | 3.914039  | -1.454720 |
| 6 | -0.615716 | -4.092873 | 0.801711  |
| 6 | -0.752092 | -4.108755 | -0.642384 |
| 6 | -0.694644 | 3.959751  | 1.388963  |
| 6 | -0.842539 | 3.271709  | 2.654465  |
| 6 | -1.006130 | -2.741877 | -3.138503 |
| 6 | -1.125169 | -1.515358 | -3.894692 |
| 6 | -1.158123 | 0.854806  | 4.144061  |
| 6 | -1.318990 | -0.579364 | 4.182902  |
| 6 | -1.360462 | 1.329999  | -3.973988 |
| 6 | -1.479421 | 2.592989  | -3.288106 |
| 6 | -1.637719 | -3.076824 | 2.830130  |
| 6 | -1.787902 | -3.830503 | 1.611057  |
| 6 | -1.734495 | 4.096595  | -0.869252 |
| 6 | -1.870260 | 4.162593  | 0.563944  |
| 6 | -2.066936 | -3.944410 | -1.232865 |
| 6 | -2.193681 | -3.293492 | -2.512461 |
| 6 | -2.168206 | 2.880012  | 3.100936  |
| 6 | -2.324975 | 1.682784  | 3.889867  |
| 6 | -2.435652 | -0.915930 | -4.078029 |

|   |           |           |           |
|---|-----------|-----------|-----------|
| 6 | -2.551839 | 0.520298  | -4.161001 |
| 6 | -2.648584 | -1.149848 | 4.050945  |
| 6 | -2.807019 | -2.433990 | 3.403851  |
| 6 | -2.792006 | 3.059483  | -2.877951 |
| 6 | -2.916145 | 3.854935  | -1.673785 |
| 6 | -3.108778 | -3.997957 | 1.034207  |
| 6 | -3.246472 | -4.096008 | -0.405670 |
| 6 | -3.186690 | 4.068170  | 1.160912  |
| 6 | -3.333810 | 3.455903  | 2.470757  |
| 6 | -3.500989 | -2.879842 | -2.975774 |
| 6 | -3.620612 | -1.695030 | -3.808880 |
| 6 | -3.645127 | 1.134742  | 4.093886  |
| 6 | -3.804066 | -0.307129 | 4.215710  |
| 6 | -3.853564 | 1.133740  | -4.049492 |
| 6 | -3.969770 | 2.443743  | -3.430105 |
| 6 | -4.121569 | -2.868088 | 3.007492  |
| 6 | -4.272808 | -3.696011 | 1.825201  |
| 6 | -4.221094 | 4.068377  | -1.100042 |
| 6 | -4.353009 | 4.212452  | 0.334455  |
| 6 | -4.552780 | -3.961205 | -1.000472 |
| 6 | -4.677952 | -3.379414 | -2.318230 |
| 6 | -4.648065 | 3.087610  | 2.937431  |
| 6 | -4.801522 | 1.933740  | 3.786293  |
| 6 | -4.921464 | -1.105363 | -4.019605 |
| 6 | -5.036190 | 0.320472  | -4.175521 |
| 6 | -5.124253 | -0.879585 | 4.102328  |
| 6 | -5.284447 | -2.184052 | 3.527330  |
| 6 | -5.276623 | 2.918888  | -3.032821 |
| 6 | -5.401084 | 3.767164  | -1.884154 |
| 6 | -5.591993 | -3.875106 | 1.255051  |
| 6 | -5.731532 | -4.048570 | -0.160071 |
| 6 | -5.674800 | 4.133737  | 0.935853  |
| 6 | -5.826530 | 3.616469  | 2.269160  |
| 6 | -5.992789 | -2.978572 | -2.795096 |
| 6 | -6.119310 | -1.864859 | -3.696558 |
| 6 | -6.139327 | 1.399605  | 4.023080  |
| 6 | -6.298369 | -0.025840 | 4.230891  |
| 6 | -6.356515 | 0.938590  | -4.101413 |
| 6 | -6.473514 | 2.278540  | -3.558271 |
| 6 | -6.618827 | -2.642747 | 3.166863  |
| 6 | -6.773354 | -3.537142 | 2.034399  |
| 6 | -6.720520 | 4.022853  | -1.330207 |
| 6 | -6.843566 | 4.251718  | 0.097098  |
| 6 | -7.052201 | -3.962283 | -0.759109 |
| 6 | -7.170430 | -3.460404 | -2.115550 |
| 6 | -7.153709 | 3.331015  | 2.790362  |
| 6 | -7.296029 | 2.208295  | 3.758103  |
| 6 | -7.432622 | -1.319908 | -3.996149 |
| 6 | -7.536102 | 0.138160  | -4.267809 |
| 6 | -7.611367 | -0.610771 | 4.226098  |
| 6 | -7.772503 | -1.984419 | 3.712758  |
| 6 | -7.771608 | 2.810821  | -3.236619 |
| 6 | -7.896131 | 3.738529  | -2.103748 |
| 6 | -8.084424 | -3.795011 | 1.500439  |
| 6 | -8.226149 | -4.052056 | 0.063608  |
| 6 | -8.147326 | 4.240948  | 0.713134  |
| 6 | -8.270506 | 3.834326  | 2.076225  |
| 6 | -8.468992 | -3.109963 | -2.637478 |
| 6 | -8.570371 | -2.081288 | -3.619157 |
| 6 | -8.574179 | 1.653132  | 4.114818  |
| 6 | -8.726503 | 0.291847  | 4.357011  |
| 6 | -8.799049 | 0.832263  | -4.283732 |
| 6 | -8.912664 | 2.128475  | -3.799708 |
| 6 | -9.063514 | -2.544403 | 3.385174  |
| 6 | -9.212881 | -3.428566 | 2.329105  |
| 6 | -9.181713 | 4.077567  | -1.514611 |
| 6 | -9.304528 | 4.336927  | -0.165409 |
| 6 | -9.517459 | -4.027140 | -0.608586 |
| 6 | -9.636631 | -3.593726 | -1.911186 |
| 1 | 10.629150 | 3.478235  | -2.367961 |

|   |            |           |           |
|---|------------|-----------|-----------|
| 1 | 10.422490  | 4.260458  | -0.032549 |
| 1 | 10.297624  | -4.482883 | 0.281324  |
| 1 | 10.084565  | -4.022080 | -2.136842 |
| 1 | 10.222521  | 3.740773  | 2.033704  |
| 1 | 9.958112   | 2.173853  | 3.902650  |
| 1 | 9.909848   | -2.577707 | -3.711083 |
| 1 | 9.710386   | -0.287728 | -4.563810 |
| 1 | 9.737094   | 0.112166  | 4.497311  |
| 1 | 9.469895   | -2.286499 | 4.069254  |
| 1 | 9.574966   | 1.729465  | -3.886164 |
| 1 | 9.283124   | -3.688233 | 2.473323  |
| 1 | -9.283119  | 3.688011  | 2.473685  |
| 1 | -9.574964  | -1.729091 | -3.886336 |
| 1 | -9.469896  | 2.286102  | 4.069473  |
| 1 | -9.737094  | -0.112604 | 4.497301  |
| 1 | -9.710387  | 0.288171  | -4.563775 |
| 1 | -9.909850  | 2.578067  | -3.710824 |
| 1 | -9.958112  | -2.174235 | 3.902440  |
| 1 | -10.222523 | -3.740971 | 2.033338  |
| 1 | -10.084564 | 4.022295  | -2.136452 |
| 1 | -10.297624 | 4.482859  | 0.281758  |
| 1 | -10.422490 | -4.260451 | -0.032961 |
| 1 | -10.629150 | -3.478001 | -2.368296 |

Nanotube (7,5) u07v10  
B3LYP/STO-3G Energy: -7091.722527

|   |           |           |           |
|---|-----------|-----------|-----------|
| 6 | -9.719808 | -3.091227 | -2.704267 |
| 6 | -9.579104 | -3.842719 | -1.558454 |
| 6 | -9.464369 | 4.128583  | 1.009538  |
| 6 | -9.353416 | 4.226702  | -0.361330 |
| 6 | -9.244986 | -4.016232 | 1.431437  |
| 6 | -9.093700 | -3.430883 | 2.677186  |
| 6 | -9.086682 | 2.933831  | -3.072185 |
| 6 | -8.963233 | 1.807158  | -3.872794 |
| 6 | -8.781845 | -0.932967 | 4.339676  |
| 6 | -8.650384 | 0.446505  | 4.452730  |
| 6 | -8.692504 | -1.175792 | -3.976204 |
| 6 | -8.566841 | -2.419441 | -3.292605 |
| 6 | -8.398766 | 3.081733  | 3.038174  |
| 6 | -8.295957 | 3.826244  | 1.825307  |
| 6 | -8.278650 | -4.020170 | -0.926515 |
| 6 | -8.121961 | -4.139028 | 0.525662  |
| 6 | -8.069900 | 4.068537  | -1.027939 |
| 6 | -7.946966 | 3.465132  | -2.361169 |
| 6 | -7.805338 | -2.952517 | 3.125805  |
| 6 | -7.655989 | -1.754731 | 3.972205  |
| 6 | -7.691382 | 1.150009  | -4.045048 |
| 6 | -7.567723 | -0.326776 | -4.156651 |
| 6 | -7.383159 | 1.094748  | 4.239675  |
| 6 | -7.266780 | 2.429455  | 3.591450  |
| 6 | -7.257518 | -2.873828 | -2.890599 |
| 6 | -7.116225 | -3.705417 | -1.709629 |
| 6 | -6.999094 | 4.015273  | 1.222815  |
| 6 | -6.889182 | 4.162434  | -0.216418 |
| 6 | -6.807479 | -4.007283 | 1.096480  |
| 6 | -6.650150 | -3.431077 | 2.419475  |
| 6 | -6.646271 | 3.052331  | -2.819271 |
| 6 | -6.519724 | 1.898141  | -3.689155 |
| 6 | -6.350845 | -1.170195 | 4.116526  |
| 6 | -6.213194 | 0.263508  | 4.280196  |
| 6 | -6.245084 | -0.911447 | -4.019138 |
| 6 | -6.094585 | -2.217111 | -3.434581 |
| 6 | -5.949958 | 2.860208  | 3.151348  |
| 6 | -5.819947 | 3.704108  | 1.994055  |
| 6 | -5.787598 | -3.922608 | -1.164553 |
| 6 | -5.632227 | -4.115074 | 0.246083  |
| 6 | -5.573301 | 4.076165  | -0.827637 |

|   |           |           |           |
|---|-----------|-----------|-----------|
| 6 | -5.451469 | 3.552790  | -2.156009 |
| 6 | -5.317676 | -3.058283 | 2.873211  |
| 6 | -5.167580 | -1.943328 | 3.762111  |
| 6 | -5.193141 | 1.338442  | -3.929523 |
| 6 | -5.059929 | -0.076957 | -4.146381 |
| 6 | -4.885521 | 0.861449  | 4.177321  |
| 6 | -4.757013 | 2.195642  | 3.652488  |
| 6 | -4.769006 | -2.707770 | -3.088263 |
| 6 | -4.620239 | -3.605068 | -1.965559 |
| 6 | -4.505718 | 3.953912  | 1.422361  |
| 6 | -4.387843 | 4.183213  | -0.001190 |
| 6 | -4.307408 | -4.066654 | 0.831396  |
| 6 | -4.151733 | -3.567190 | 2.183920  |
| 6 | -4.142722 | 3.213773  | -2.671937 |
| 6 | -4.018127 | 2.109223  | -3.607963 |
| 6 | -3.852714 | -1.398113 | 4.007620  |
| 6 | -3.714339 | 0.027871  | 4.260401  |
| 6 | -3.749455 | -0.682361 | -4.106615 |
| 6 | -3.605981 | -2.039768 | -3.607606 |
| 6 | -3.452399 | 2.692653  | 3.286676  |
| 6 | -3.328059 | 3.621694  | 2.176201  |
| 6 | -3.304808 | -3.869012 | -1.437322 |
| 6 | -3.149655 | -4.139337 | -0.021093 |
| 6 | -3.086525 | 4.143207  | -0.620651 |
| 6 | -2.966353 | 3.684067  | -1.989628 |
| 6 | -2.837879 | -3.228581 | 2.666711  |
| 6 | -2.688451 | -2.151489 | 3.621681  |
| 6 | -2.710968 | 1.563923  | -3.884582 |
| 6 | -2.577341 | 0.156487  | -4.176236 |
| 6 | -2.404563 | 0.630972  | 4.195390  |
| 6 | -2.272955 | 1.993603  | 3.739948  |
| 6 | -2.289096 | -2.540054 | -3.278580 |
| 6 | -2.138563 | -3.494239 | -2.209285 |
| 6 | -2.020294 | 3.885586  | 1.613131  |
| 6 | -1.899606 | 4.188435  | 0.209525  |
| 6 | -1.824164 | -4.102664 | 0.567092  |
| 6 | -1.668066 | -3.682336 | 1.935879  |
| 6 | -1.652987 | 3.356111  | -2.515269 |
| 6 | -1.526865 | 2.314358  | -3.503677 |
| 6 | -1.365448 | -1.612283 | 3.883944  |
| 6 | -1.224106 | -0.216076 | 4.216617  |
| 6 | -1.257757 | -0.451318 | -4.165047 |
| 6 | -1.115397 | -1.828902 | -3.753129 |
| 6 | -0.957645 | 2.507510  | 3.398458  |
| 6 | -0.832787 | 3.496632  | 2.350656  |
| 6 | -0.813751 | -3.784296 | -1.692317 |
| 6 | -0.658321 | -4.132022 | -0.294221 |
| 6 | -0.589796 | 4.179433  | -0.413220 |
| 6 | -0.470064 | 3.795955  | -1.807755 |
| 6 | -0.346794 | -3.374816 | 2.441976  |
| 6 | -0.197391 | -2.351953 | 3.462425  |
| 6 | -0.218278 | 1.788168  | -3.821216 |
| 6 | -0.086563 | 0.390817  | -4.198211 |
| 6 | 0.086563  | 0.390751  | 4.198217  |
| 6 | 0.218278  | 1.788108  | 3.821245  |
| 6 | 0.197391  | -2.351899 | -3.462462 |
| 6 | 0.346794  | -3.374778 | -2.442029 |
| 6 | 0.470064  | 3.795927  | 1.807815  |
| 6 | 0.589796  | 4.179427  | 0.413287  |
| 6 | 0.658321  | -4.132027 | 0.294156  |
| 6 | 0.813750  | -3.784322 | 1.692257  |
| 6 | 0.832787  | 3.496668  | -2.350600 |
| 6 | 0.957645  | 2.507563  | -3.398418 |
| 6 | 1.115397  | -1.828961 | 3.753100  |
| 6 | 1.257757  | -0.451384 | 4.165040  |
| 6 | 1.224106  | -0.216010 | -4.216620 |
| 6 | 1.365448  | -1.612222 | -3.883969 |
| 6 | 1.526865  | 2.314303  | 3.503714  |
| 6 | 1.652987  | 3.356072  | 2.515323  |
| 6 | 1.668066  | -3.682305 | -1.935937 |

|   |          |           |           |
|---|----------|-----------|-----------|
| 6 | 1.824164 | -4.102655 | -0.567157 |
| 6 | 1.899606 | 4.188438  | -0.209458 |
| 6 | 2.020294 | 3.885612  | -1.613069 |
| 6 | 2.138563 | -3.494273 | 2.209231  |
| 6 | 2.289095 | -2.540106 | 3.278540  |
| 6 | 2.272955 | 1.993662  | -3.739916 |
| 6 | 2.404564 | 0.631037  | -4.195379 |
| 6 | 2.577341 | 0.156421  | 4.176238  |
| 6 | 2.710969 | 1.563861  | 3.884606  |
| 6 | 2.688452 | -2.151433 | -3.621715 |
| 6 | 2.837879 | -3.228540 | -2.666762 |
| 6 | 2.966353 | 3.684036  | 1.989686  |
| 6 | 3.086525 | 4.143197  | 0.620717  |
| 6 | 3.149655 | -4.139337 | 0.021028  |
| 6 | 3.304808 | -3.869035 | 1.437262  |
| 6 | 3.328059 | 3.621728  | -2.176143 |
| 6 | 3.452399 | 2.692704  | -3.286633 |
| 6 | 3.605981 | -2.039825 | 3.607575  |
| 6 | 3.749455 | -0.682426 | 4.106605  |
| 6 | 3.714339 | 0.027938  | -4.260400 |
| 6 | 3.852714 | -1.398050 | -4.007642 |
| 6 | 4.018127 | 2.109166  | 3.607995  |
| 6 | 4.142723 | 3.213730  | 2.671988  |
| 6 | 4.151733 | -3.567156 | -2.183975 |
| 6 | 4.307407 | -4.066641 | -0.831460 |
| 6 | 4.387843 | 4.183214  | 0.001256  |
| 6 | 4.505718 | 3.953936  | -1.422299 |
| 6 | 4.620239 | -3.605100 | 1.965503  |
| 6 | 4.769005 | -2.707820 | 3.088221  |
| 6 | 4.757014 | 2.195699  | -3.652453 |
| 6 | 4.885522 | 0.861514  | -4.177308 |
| 6 | 5.059929 | -0.077023 | 4.146380  |
| 6 | 5.193141 | 1.338379  | 3.929543  |
| 6 | 5.167580 | -1.943269 | -3.762141 |
| 6 | 5.317676 | -3.058238 | -2.873258 |
| 6 | 5.451469 | 3.552756  | 2.156064  |
| 6 | 5.573300 | 4.076153  | 0.827700  |
| 6 | 5.632226 | -4.115071 | -0.246147 |
| 6 | 5.787598 | -3.922628 | 1.164492  |
| 6 | 5.819946 | 3.704141  | -1.993997 |
| 6 | 5.949958 | 2.860258  | -3.151302 |
| 6 | 6.094585 | -2.217167 | 3.434547  |
| 6 | 6.245084 | -0.911511 | 4.019123  |
| 6 | 6.213194 | 0.263575  | -4.280192 |
| 6 | 6.350845 | -1.170131 | -4.116544 |
| 6 | 6.519724 | 1.898082  | 3.689182  |
| 6 | 6.646271 | 3.052285  | 2.819316  |
| 6 | 6.650150 | -3.431039 | -2.419528 |
| 6 | 6.807478 | -4.007267 | -1.096542 |
| 6 | 6.889182 | 4.162432  | 0.216482  |
| 6 | 6.999093 | 4.015296  | -1.222753 |
| 6 | 7.116225 | -3.705446 | 1.709572  |
| 6 | 7.257518 | -2.873876 | 2.890555  |
| 6 | 7.266780 | 2.429511  | -3.591410 |
| 6 | 7.383159 | 1.094815  | -4.239655 |
| 6 | 7.567723 | -0.326843 | 4.156646  |
| 6 | 7.691383 | 1.149944  | 4.045064  |
| 6 | 7.655989 | -1.754669 | -3.972232 |
| 6 | 7.805338 | -2.952468 | -3.125851 |
| 6 | 7.946967 | 3.465093  | 2.361221  |
| 6 | 8.069900 | 4.068523  | 1.028002  |
| 6 | 8.121960 | -4.139021 | -0.525727 |
| 6 | 8.278649 | -4.020188 | 0.926452  |
| 6 | 8.295956 | 3.826278  | -1.825248 |
| 6 | 8.398766 | 3.081785  | -3.038127 |
| 6 | 8.566841 | -2.419495 | 3.292566  |
| 6 | 8.692504 | -1.175856 | 3.976184  |
| 6 | 8.650386 | 0.446575  | -4.452718 |
| 6 | 8.781847 | -0.932898 | -4.339686 |
| 6 | 8.963233 | 1.807095  | 3.872819  |

|   |            |           |           |
|---|------------|-----------|-----------|
| 6 | 9.086682   | 2.933782  | 3.072226  |
| 6 | 9.093700   | -3.430843 | -2.677240 |
| 6 | 9.244986   | -4.016212 | -1.431500 |
| 6 | 9.353415   | 4.226702  | 0.361395  |
| 6 | 9.464367   | 4.128608  | -1.009475 |
| 6 | 9.579105   | -3.842746 | 1.558394  |
| 6 | 9.719808   | -3.091271 | 2.704217  |
| 1 | -10.719176 | -2.877343 | -3.108001 |
| 1 | -10.473702 | -4.230548 | -1.054330 |
| 1 | -10.453944 | 4.141308  | 1.487127  |
| 1 | -10.262094 | 4.321407  | -0.969784 |
| 1 | -10.253877 | -4.259776 | 1.074628  |
| 1 | -9.985912  | -3.221413 | 3.281304  |
| 1 | -10.087793 | 3.332440  | -2.863937 |
| 1 | -9.870765  | 1.340399  | -4.277170 |
| 1 | -9.785027  | -1.376293 | 4.381277  |
| 1 | -9.554384  | 1.056144  | 4.579727  |
| 1 | -9.704256  | -0.781184 | -4.135414 |
| 1 | -9.404753  | 2.822927  | 3.392929  |
| 1 | 9.404753   | 2.822988  | -3.392887 |
| 1 | 9.704256   | -0.781249 | 4.135395  |
| 1 | 9.554385   | 1.056217  | -4.579704 |
| 1 | 9.785029   | -1.376225 | -4.381294 |
| 1 | 9.870767   | 1.340328  | 4.277183  |
| 1 | 10.087795  | 3.332388  | 2.863979  |
| 1 | 9.985912   | -3.221363 | -3.281354 |
| 1 | 10.253876  | -4.259761 | -1.074695 |
| 1 | 10.262093  | 4.321399  | 0.969850  |
| 1 | 10.453943  | 4.141342  | -1.487064 |
| 1 | 10.473701  | -4.230566 | 1.054262  |
| 1 | 10.719176  | -2.877391 | 3.107954  |

Nanotube (7,5) u07v11  
B3LYP/STO-3G Energy: -7167.019723

|   |           |           |           |
|---|-----------|-----------|-----------|
| 6 | -9.811057 | -2.206463 | -3.492272 |
| 6 | -9.693447 | -3.227591 | -2.575917 |
| 6 | -9.550249 | 3.811383  | 1.946173  |
| 6 | -9.417943 | 4.256933  | 0.648508  |
| 6 | -9.402915 | -4.167275 | 0.273032  |
| 6 | -9.263954 | -3.923618 | 1.628446  |
| 6 | -9.120310 | 3.702586  | -2.300312 |
| 6 | -8.994120 | 2.818114  | -3.361221 |
| 6 | -8.954863 | -1.940307 | 3.879883  |
| 6 | -8.814227 | -0.637906 | 4.343839  |
| 6 | -8.748154 | -0.042357 | -4.219427 |
| 6 | -8.643498 | -1.419923 | -3.875460 |
| 6 | -8.522487 | 2.267922  | 3.651695  |
| 6 | -8.396138 | 3.296461  | 2.671985  |
| 6 | -8.403204 | -3.576898 | -1.995238 |
| 6 | -8.267972 | -4.066023 | -0.621647 |
| 6 | -8.125162 | 4.260704  | -0.020466 |
| 6 | -7.986692 | 4.019092  | -1.461380 |
| 6 | -7.977317 | -3.591046 | 2.199532  |
| 6 | -7.829995 | -2.652960 | 3.326034  |
| 6 | -7.724758 | 2.210758  | -3.679641 |
| 6 | -7.612472 | 0.811137  | -4.163790 |
| 6 | -7.538464 | 0.029413  | 4.318070  |
| 6 | -7.402892 | 1.483634  | 4.034491  |
| 6 | -7.343796 | -1.978745 | -3.588834 |
| 6 | -7.226873 | -3.086947 | -2.659042 |
| 6 | -7.088779 | 3.620255  | 2.154923  |
| 6 | -6.956098 | 4.130578  | 0.803037  |
| 6 | -6.960316 | -4.101892 | -0.021142 |
| 6 | -6.816469 | -3.886300 | 1.407366  |
| 6 | -6.682539 | 3.722740  | -1.994039 |
| 6 | -6.552405 | 2.828595  | -3.129522 |
| 6 | -6.522382 | -2.139863 | 3.630679  |

|   |           |           |           |
|---|-----------|-----------|-----------|
| 6 | -6.375920 | -0.797389 | 4.158208  |
| 6 | -6.297698 | 0.194453  | -4.165230 |
| 6 | -6.167627 | -1.219365 | -3.933089 |
| 6 | -6.077149 | 1.998635  | 3.736140  |
| 6 | -5.923978 | 3.109309  | 2.835394  |
| 6 | -5.908536 | -3.453131 | -2.172931 |
| 6 | -5.774703 | -4.002100 | -0.857149 |
| 6 | -5.632230 | 4.188748  | 0.206580  |
| 6 | -5.494244 | 4.021430  | -1.209399 |
| 6 | -5.487590 | -3.656830 | 1.956329  |
| 6 | -5.340676 | -2.808807 | 3.102436  |
| 6 | -5.227338 | 2.332078  | -3.487635 |
| 6 | -5.103305 | 1.019042  | -4.058413 |
| 6 | -5.042310 | -0.207659 | 4.226731  |
| 6 | -4.896277 | 1.214256  | 4.064125  |
| 6 | -4.851510 | -1.798814 | -3.708405 |
| 6 | -4.726885 | -2.954907 | -2.852672 |
| 6 | -4.599236 | 3.482903  | 2.363162  |
| 6 | -4.458122 | 4.067147  | 1.048266  |
| 6 | -4.457200 | -4.120645 | -0.263684 |
| 6 | -4.315874 | -3.985388 | 1.172246  |
| 6 | -4.179662 | 3.809445  | -1.778300 |
| 6 | -4.049807 | 2.980326  | -2.963431 |
| 6 | -4.024132 | -2.359079 | 3.494090  |
| 6 | -3.878215 | -1.047902 | 4.106200  |
| 6 | -3.798158 | 0.407341  | -4.159660 |
| 6 | -3.674434 | -1.034036 | -4.025806 |
| 6 | -3.582478 | 1.774675  | 3.855077  |
| 6 | -3.435154 | 2.956611  | 3.022478  |
| 6 | -3.421062 | -3.362778 | -2.395476 |
| 6 | -3.288246 | -3.988098 | -1.093733 |
| 6 | -3.147818 | 4.173179  | 0.455847  |
| 6 | -3.010050 | 4.076785  | -0.983704 |
| 6 | -3.005819 | -3.796867 | 1.740518  |
| 6 | -2.860856 | -3.001210 | 2.941167  |
| 6 | -2.743417 | 2.508123  | -3.353959 |
| 6 | -2.617955 | 1.220930  | -3.996477 |
| 6 | -2.563425 | -0.462871 | 4.213957  |
| 6 | -2.415334 | 0.969831  | 4.127187  |
| 6 | -2.367693 | -1.618962 | -3.822225 |
| 6 | -2.241395 | -2.818024 | -3.032598 |
| 6 | -2.118069 | 3.342435  | 2.562827  |
| 6 | -1.974065 | 3.992200  | 1.285083  |
| 6 | -1.971318 | -4.118535 | -0.500768 |
| 6 | -1.830396 | -4.062016 | 0.931252  |
| 6 | -1.691836 | 3.876604  | -1.558151 |
| 6 | -1.559097 | 3.119820  | -2.776792 |
| 6 | -1.537269 | -2.561016 | 3.346701  |
| 6 | -1.389622 | -1.299476 | 4.028588  |
| 6 | -1.304412 | 0.613747  | -4.124701 |
| 6 | -1.180688 | -0.823683 | -4.082270 |
| 6 | -1.091251 | 1.540200  | 3.945578  |
| 6 | -0.943914 | 2.764281  | 3.191198  |
| 6 | -0.926478 | -3.247507 | -2.591978 |
| 6 | -0.793610 | -3.941391 | -1.328673 |
| 6 | -0.654300 | 4.127731  | 0.697282  |
| 6 | -0.515425 | 4.108300  | -0.745710 |
| 6 | -0.512589 | -3.907888 | 1.513518  |
| 6 | -0.368794 | -3.180829 | 2.762120  |
| 6 | -0.248960 | 2.674715  | -3.200417 |
| 6 | -0.123944 | 1.421345  | -3.922875 |
| 6 | -0.073646 | -0.722762 | 4.182526  |
| 6 | 0.073646  | 0.723110  | 4.182466  |
| 6 | 0.123944  | -1.421673 | -3.922757 |
| 6 | 0.248960  | -2.674984 | -3.200195 |
| 6 | 0.368794  | 3.181060  | 2.761856  |
| 6 | 0.512588  | 3.908014  | 1.513193  |
| 6 | 0.515424  | -4.108364 | -0.745368 |
| 6 | 0.654300  | -4.127674 | 0.697625  |
| 6 | 0.793609  | 3.941278  | -1.329000 |



|   |          |           |           |
|---|----------|-----------|-----------|
| 6 | 0.926477 | 3.247289  | -2.592248 |
| 6 | 0.943915 | -2.764015 | 3.191426  |
| 6 | 1.091251 | -1.539871 | 3.945705  |
| 6 | 1.180688 | 0.823342  | -4.082338 |
| 6 | 1.304413 | -0.614092 | -4.124650 |
| 6 | 1.389623 | 1.299812  | 4.028481  |
| 6 | 1.537269 | 2.561296  | 3.346489  |
| 6 | 1.559097 | -3.120053 | -2.776534 |
| 6 | 1.691835 | -3.876736 | -1.557829 |
| 6 | 1.830396 | 4.062094  | 0.930915  |
| 6 | 1.971318 | 4.118492  | -0.501110 |
| 6 | 1.974065 | -3.992094 | 1.285415  |
| 6 | 2.118070 | -3.342221 | 2.563104  |
| 6 | 2.241395 | 2.817769  | -3.032832 |
| 6 | 2.367694 | 1.618642  | -3.822359 |
| 6 | 2.415335 | -0.969487 | 4.127267  |
| 6 | 2.563426 | 0.463222  | 4.213918  |
| 6 | 2.617955 | -1.221265 | -3.996376 |
| 6 | 2.743417 | -2.508404 | -3.353751 |
| 6 | 2.860855 | 3.001456  | 2.940919  |
| 6 | 3.005818 | 3.797012  | 1.740203  |
| 6 | 3.010049 | -4.076869 | -0.983366 |
| 6 | 3.147818 | -4.173142 | 0.456194  |
| 6 | 3.288246 | 3.988006  | -1.094064 |
| 6 | 3.421061 | 3.362576  | -2.395755 |
| 6 | 3.435155 | -2.956359 | 3.022722  |
| 6 | 3.582479 | -1.774354 | 3.855222  |
| 6 | 3.674434 | 1.033700  | -4.025892 |
| 6 | 3.798158 | -0.407689 | -4.159626 |
| 6 | 3.878215 | 1.048245  | 4.106114  |
| 6 | 4.024132 | 2.359371  | 3.493895  |
| 6 | 4.049806 | -2.980575 | -2.963185 |
| 6 | 4.179661 | -3.809595 | -1.777984 |
| 6 | 4.315873 | 3.985486  | 1.171915  |
| 6 | 4.457199 | 4.120623  | -0.264026 |
| 6 | 4.458122 | -4.067061 | 1.048604  |
| 6 | 4.599238 | -3.482706 | 2.363450  |
| 6 | 4.726885 | 2.954667  | -2.852916 |
| 6 | 4.851510 | 1.798503  | -3.708554 |
| 6 | 4.896278 | -1.213917 | 4.064225  |
| 6 | 5.042311 | 0.208013  | 4.226713  |
| 6 | 5.103306 | -1.019381 | -4.058329 |
| 6 | 5.227338 | -2.332371 | -3.487442 |
| 6 | 5.340675 | 2.809068  | 3.102204  |
| 6 | 5.487588 | 3.656996  | 1.956026  |
| 6 | 5.494243 | -4.021535 | -1.209066 |
| 6 | 5.632230 | -4.188733 | 0.206928  |
| 6 | 5.774702 | 4.002028  | -0.857481 |
| 6 | 5.908535 | 3.452950  | -2.173217 |
| 6 | 5.923979 | -3.109071 | 2.835649  |
| 6 | 6.077151 | -1.998321 | 3.736302  |
| 6 | 6.167628 | 1.219036  | -3.933188 |
| 6 | 6.297699 | -0.194802 | -4.165212 |
| 6 | 6.375920 | 0.797739  | 4.158141  |
| 6 | 6.522382 | 2.140169  | 3.630502  |
| 6 | 6.552404 | -2.828859 | -3.129287 |
| 6 | 6.682537 | -3.722911 | -1.993731 |
| 6 | 6.816468 | 3.886421  | 1.407044  |
| 6 | 6.960314 | 4.101893  | -0.021482 |
| 6 | 6.956098 | -4.130513 | 0.803379  |
| 6 | 7.088780 | -3.620074 | 2.155221  |
| 6 | 7.226873 | 3.086725  | -2.659297 |
| 6 | 7.343797 | 1.978444  | -3.588996 |
| 6 | 7.402894 | -1.483293 | 4.034607  |
| 6 | 7.538465 | -0.029050 | 4.318067  |
| 6 | 7.612473 | -0.811486 | -4.163717 |
| 6 | 7.724758 | -2.211068 | -3.679456 |
| 6 | 7.829994 | 2.653243  | 3.325815  |
| 6 | 7.977315 | 3.591236  | 2.199236  |
| 6 | 7.986691 | -4.019219 | -1.461048 |

|   |            |           |           |
|---|------------|-----------|-----------|
| 6 | 8.125160   | -4.260710 | -0.020115 |
| 6 | 8.267970   | 4.065974  | -0.621984 |
| 6 | 8.403203   | 3.576733  | -1.995533 |
| 6 | 8.396141   | -3.296232 | 2.672251  |
| 6 | 8.522490   | -2.267608 | 3.651870  |
| 6 | 8.643500   | 1.419597  | -3.875569 |
| 6 | 8.748158   | 0.042001  | -4.219412 |
| 6 | 8.814227   | 0.638273  | 4.343782  |
| 6 | 8.954862   | 1.940636  | 3.879722  |
| 6 | 8.994119   | -2.818399 | -3.360987 |
| 6 | 9.120308   | -3.702786 | -2.300007 |
| 6 | 9.263953   | 3.923761  | 1.628122  |
| 6 | 9.402913   | 4.167304  | 0.272687  |
| 6 | 9.417943   | -4.256881 | 0.648855  |
| 6 | 9.550251   | -3.811214 | 1.946481  |
| 6 | 9.693447   | 3.227377  | -2.576181 |
| 6 | 9.811058   | 2.206170  | -3.492447 |
| 1 | -10.802442 | -1.884565 | -3.840146 |
| 1 | -10.598330 | -3.721452 | -2.198874 |
| 1 | -10.546619 | 3.712726  | 2.398972  |
| 1 | -10.316337 | 4.515808  | 0.073398  |
| 1 | -10.408526 | -4.300306 | -0.145912 |
| 1 | -10.162301 | -3.867171 | 2.256674  |
| 1 | -10.120716 | 4.048270  | -2.010235 |
| 1 | -9.898738  | 2.483016  | -3.885039 |
| 1 | -9.961651  | -2.369235 | 3.796248  |
| 1 | -9.714673  | -0.071124 | 4.613996  |
| 1 | -9.753689  | 0.392633  | -4.284870 |
| 1 | -9.535267  | 1.937764  | 3.916144  |
| 1 | 9.535275   | -1.937413 | 3.916277  |
| 1 | 9.753700   | -0.393000 | -4.284793 |
| 1 | 9.714674   | 0.071513  | 4.613982  |
| 1 | 9.961650   | 2.369556  | 3.796049  |
| 1 | 9.898738   | -2.483344 | -3.884832 |
| 1 | 10.120713  | -4.048450 | -2.009904 |
| 1 | 10.162299  | 3.867368  | 2.256355  |
| 1 | 10.408523  | 4.300301  | -0.146269 |
| 1 | 10.316336  | -4.515805 | 0.073767  |
| 1 | 10.546623  | -3.712515 | 2.399270  |
| 1 | 10.598329  | 3.721272  | -2.199178 |
| 1 | 10.802443  | 1.884243  | -3.840294 |

Nanotube (7,5) u08v00  
B3LYP/STO-3G Energy: -7242.316575

|   |          |           |           |
|---|----------|-----------|-----------|
| 6 | 9.959075 | -1.296405 | 3.839239  |
| 6 | 9.823619 | -2.516631 | 3.216678  |
| 6 | 9.642740 | 3.123742  | -2.955700 |
| 6 | 9.532582 | 3.887974  | -1.814444 |
| 6 | 9.485744 | -4.152456 | 0.707320  |
| 6 | 9.326542 | -4.263781 | -0.662514 |
| 6 | 9.276565 | 4.112707  | 1.181823  |
| 6 | 9.161814 | 3.531963  | 2.435424  |
| 6 | 8.989569 | -2.924305 | -3.344012 |
| 6 | 8.847189 | -1.784071 | -4.124335 |
| 6 | 8.915871 | 0.989721  | 4.001213  |
| 6 | 8.800246 | -0.428153 | 4.023238  |
| 6 | 8.580582 | 1.204071  | -4.194186 |
| 6 | 8.474644 | 2.449501  | -3.509615 |
| 6 | 8.522796 | -2.992845 | 2.761826  |
| 6 | 8.364704 | -3.816119 | 1.562416  |
| 6 | 8.249594 | 4.074602  | -1.151206 |
| 6 | 8.131624 | 4.212265  | 0.304091  |
| 6 | 8.031628 | -4.079060 | -1.281876 |
| 6 | 7.870141 | -3.461198 | -2.608571 |
| 6 | 7.893766 | 3.036778  | 2.915754  |
| 6 | 7.782330 | 1.809843  | 3.743845  |
| 6 | 7.574335 | -1.121082 | -4.251561 |

|   |          |           |           |
|---|----------|-----------|-----------|
| 6 | 7.450344 | 0.357535  | -4.348260 |
| 6 | 7.493733 | -1.031759 | 3.907601  |
| 6 | 7.358504 | -2.340502 | 3.294872  |
| 6 | 7.176669 | 2.907394  | -3.075926 |
| 6 | 7.067374 | 3.748808  | -1.898680 |
| 6 | 7.047666 | -3.996032 | 1.009899  |
| 6 | 6.882288 | -4.153195 | -0.424159 |
| 6 | 6.834011 | 4.074742  | 0.912510  |
| 6 | 6.716429 | 3.502913  | 2.241334  |
| 6 | 6.559987 | -3.033099 | -3.016367 |
| 6 | 6.410904 | -1.869443 | -3.868719 |
| 6 | 6.465498 | 1.224627  | 3.921019  |
| 6 | 6.326193 | -0.200531 | 4.061122  |
| 6 | 6.132504 | 0.943536  | -4.174077 |
| 6 | 5.999220 | 2.249665  | -3.586629 |
| 6 | 6.031929 | -2.809104 | 2.937338  |
| 6 | 5.876006 | -3.676172 | 1.808771  |
| 6 | 5.753485 | 3.970003  | -1.319516 |
| 6 | 5.636009 | 4.172244  | 0.093457  |
| 6 | 5.546164 | -4.061305 | -0.994731 |
| 6 | 5.384323 | -3.533787 | -2.316893 |
| 6 | 5.394676 | 3.124729  | 2.731572  |
| 6 | 5.272991 | 2.003408  | 3.620799  |
| 6 | 5.079199 | -1.304986 | -4.065773 |
| 6 | 4.942566 | 0.111179  | -4.271698 |
| 6 | 5.004163 | -0.807900 | 4.009680  |
| 6 | 4.862210 | -2.143473 | 3.482408  |
| 6 | 4.683681 | 2.743718  | -3.207869 |
| 6 | 4.565762 | 3.646714  | -2.086466 |
| 6 | 4.548498 | -3.933291 | 1.284005  |
| 6 | 4.385137 | -4.169188 | -0.135504 |
| 6 | 4.328375 | 4.124080  | 0.715239  |
| 6 | 4.211842 | 3.626936  | 2.073693  |
| 6 | 4.062570 | -3.187839 | -2.791461 |
| 6 | 3.912354 | -2.076544 | -3.716110 |
| 6 | 3.966094 | 1.448306  | 3.892555  |
| 6 | 3.834478 | 0.022132  | 4.135444  |
| 6 | 3.634201 | 0.718250  | -4.195485 |
| 6 | 3.506169 | 2.075933  | -3.694350 |
| 6 | 3.547923 | -2.646104 | 3.164453  |
| 6 | 3.393074 | -3.584673 | 2.069458  |
| 6 | 3.264872 | 3.914296  | -1.524027 |
| 6 | 3.148374 | 4.190735  | -0.105875 |
| 6 | 3.067037 | -4.123168 | -0.714448 |
| 6 | 2.905721 | -3.658627 | -2.076489 |
| 6 | 2.909217 | 3.281221  | 2.589248  |
| 6 | 2.787393 | 2.201829  | 3.541438  |
| 6 | 2.598875 | -1.527455 | -3.951137 |
| 6 | 2.459181 | -0.118911 | -4.234104 |
| 6 | 2.522892 | -0.585373 | 4.106606  |
| 6 | 2.380410 | -1.946751 | 3.655238  |
| 6 | 2.199081 | 2.579612  | -3.332429 |
| 6 | 2.078396 | 3.537895  | -2.263295 |
| 6 | 2.067433 | -3.853810 | 1.548639  |
| 6 | 1.904337 | -4.164091 | 0.152435  |
| 6 | 1.838415 | 4.155038  | 0.518004  |
| 6 | 1.719758 | 3.734493  | 1.890182  |
| 6 | 1.577878 | -3.324151 | -2.560519 |
| 6 | 1.424520 | -2.277411 | -3.538267 |
| 6 | 1.472978 | 1.657535  | 3.836760  |
| 6 | 1.342544 | 0.259306  | 4.167121  |
| 6 | 1.141151 | 0.490947  | -4.185440 |
| 6 | 1.012042 | 1.868557  | -3.772974 |
| 6 | 1.057069 | -2.465815 | 3.358376  |
| 6 | 0.902606 | -3.461359 | 2.320382  |
| 6 | 0.768160 | 3.831895  | -1.712127 |
| 6 | 0.650748 | 4.182454  | -0.311934 |
| 6 | 0.577189 | -4.153892 | -0.431062 |
| 6 | 0.415446 | -3.765984 | -1.819437 |
| 6 | 0.412851 | 3.422280  | 2.429909  |

|   |           |           |           |
|---|-----------|-----------|-----------|
| 6 | 0.292583  | 2.395787  | 3.449319  |
| 6 | 0.107448  | -1.746935 | -3.813893 |
| 6 | -0.032835 | -0.349834 | -4.184687 |
| 6 | 0.032835  | -0.349702 | 4.184699  |
| 6 | -0.107448 | -1.746815 | 3.813947  |
| 6 | -0.292583 | 2.395678  | -3.449393 |
| 6 | -0.412851 | 3.422203  | -2.430015 |
| 6 | -0.415446 | -3.765927 | 1.819556  |
| 6 | -0.577188 | -4.153879 | 0.431193  |
| 6 | -0.650748 | 4.182464  | 0.311804  |
| 6 | -0.768160 | 3.831949  | 1.712008  |
| 6 | -0.902606 | -3.461433 | -2.320273 |
| 6 | -1.057069 | -2.465921 | -3.358298 |
| 6 | -1.012042 | 1.868676  | 3.772916  |
| 6 | -1.141151 | 0.491079  | 4.185425  |
| 6 | -1.342545 | 0.259175  | -4.167128 |
| 6 | -1.472978 | 1.657415  | -3.836811 |
| 6 | -1.424520 | -2.277300 | 3.538338  |
| 6 | -1.577878 | -3.324071 | 2.560623  |
| 6 | -1.719758 | 3.734433  | -1.890298 |
| 6 | -1.838415 | 4.155022  | -0.518134 |
| 6 | -1.904337 | -4.164097 | -0.152304 |
| 6 | -2.067433 | -3.853860 | -1.548518 |
| 6 | -2.078396 | 3.537966  | 2.263186  |
| 6 | -2.199082 | 2.579717  | 3.332349  |
| 6 | -2.380410 | -1.946866 | -3.655176 |
| 6 | -2.522892 | -0.585502 | -4.106586 |
| 6 | -2.459182 | -0.118778 | 4.234107  |
| 6 | -2.598875 | -1.527331 | 3.951184  |
| 6 | -2.787393 | 2.201717  | -3.541506 |
| 6 | -2.909217 | 3.281139  | -2.589349 |
| 6 | -2.905721 | -3.658562 | 2.076604  |
| 6 | -3.067037 | -4.123147 | 0.714577  |
| 6 | -3.148374 | 4.190739  | 0.105745  |
| 6 | -3.264872 | 3.914345  | 1.523905  |
| 6 | -3.393074 | -3.584740 | -2.069346 |
| 6 | -3.547922 | -2.646205 | -3.164370 |
| 6 | -3.506169 | 2.076050  | 3.694285  |
| 6 | -3.634202 | 0.718382  | 4.195463  |
| 6 | -3.834478 | 0.022002  | -4.135443 |
| 6 | -3.966094 | 1.448183  | -3.892598 |
| 6 | -3.912354 | -2.076427 | 3.716174  |
| 6 | -4.062571 | -3.187751 | 2.791560  |
| 6 | -4.211842 | 3.626871  | -2.073805 |
| 6 | -4.328375 | 4.124058  | -0.715367 |
| 6 | -4.385137 | -4.169185 | 0.135634  |
| 6 | -4.548497 | -3.933333 | -1.283882 |
| 6 | -4.565762 | 3.646780  | 2.086352  |
| 6 | -4.683682 | 2.743819  | 3.207784  |
| 6 | -4.862210 | -2.143584 | -3.482341 |
| 6 | -5.004163 | -0.808026 | -4.009653 |
| 6 | -4.942567 | 0.111313  | 4.271694  |
| 6 | -5.079199 | -1.304858 | 4.065812  |
| 6 | -5.272991 | 2.003294  | -3.620860 |
| 6 | -5.394676 | 3.124643  | -2.731668 |
| 6 | -5.384323 | -3.533714 | 2.317002  |
| 6 | -5.546164 | -4.061275 | 0.994857  |
| 6 | -5.636009 | 4.172242  | -0.093587 |
| 6 | -5.753485 | 3.970046  | 1.319392  |
| 6 | -5.876005 | -3.676231 | -1.808657 |
| 6 | -6.031929 | -2.809198 | -2.937250 |
| 6 | -5.999221 | 2.249778  | 3.586559  |
| 6 | -6.132504 | 0.943668  | 4.174046  |
| 6 | -6.326193 | -0.200659 | -4.061114 |
| 6 | -6.465498 | 1.224503  | -3.921055 |
| 6 | -6.410905 | -1.869320 | 3.868775  |
| 6 | -6.559988 | -3.033004 | 3.016459  |
| 6 | -6.716429 | 3.502843  | -2.241442 |
| 6 | -6.834011 | 4.074715  | -0.912637 |
| 6 | -6.882288 | -4.153183 | 0.424288  |

|   |            |           |           |
|---|------------|-----------|-----------|
| 6 | -7.047665  | -3.996066 | -1.009775 |
| 6 | -7.067374  | 3.748869  | 1.898563  |
| 6 | -7.176670  | 2.907491  | 3.075834  |
| 6 | -7.358504  | -2.340607 | -3.294799 |
| 6 | -7.493733  | -1.031883 | -3.907568 |
| 6 | -7.450345  | 0.357672  | 4.348247  |
| 6 | -7.574336  | -1.120948 | 4.251593  |
| 6 | -7.782330  | 1.809725  | -3.743900 |
| 6 | -7.893766  | 3.036687  | -2.915849 |
| 6 | -7.870141  | -3.461117 | 2.608677  |
| 6 | -8.031628  | -4.079022 | 1.282002  |
| 6 | -8.131624  | 4.212257  | -0.304223 |
| 6 | -8.249594  | 4.074640  | 1.151079  |
| 6 | -8.364704  | -3.816170 | -1.562298 |
| 6 | -8.522796  | -2.992934 | -2.761733 |
| 6 | -8.474645  | 2.449612  | 3.509538  |
| 6 | -8.580582  | 1.204203  | 4.194147  |
| 6 | -8.800246  | -0.428280 | -4.023225 |
| 6 | -8.915870  | 0.989594  | -4.001246 |
| 6 | -8.847189  | -1.783942 | 4.124389  |
| 6 | -8.989569  | -2.924202 | 3.344103  |
| 6 | -9.161814  | 3.531889  | -2.435535 |
| 6 | -9.276565  | 4.112673  | -1.181952 |
| 6 | -9.326542  | -4.263762 | 0.662646  |
| 6 | -9.485744  | -4.152480 | -0.707191 |
| 6 | -9.532582  | 3.888035  | 1.814323  |
| 6 | -9.642740  | 3.123839  | 2.955604  |
| 6 | -9.823618  | -2.516734 | -3.216601 |
| 6 | -9.959075  | -1.296527 | -3.839199 |
| 1 | 10.956668  | -0.904126 | 4.080905  |
| 1 | 10.720422  | -3.098436 | 2.967444  |
| 1 | 10.631348  | 2.903898  | -3.382024 |
| 1 | 10.440695  | 4.278543  | -1.337309 |
| 1 | 10.497062  | -4.181990 | 1.132502  |
| 1 | 10.214824  | -4.378443 | -1.297076 |
| 1 | 10.273941  | 4.365294  | 0.799809  |
| 1 | 10.072072  | 3.336432  | 3.016975  |
| 1 | 9.995339   | -3.327264 | -3.168824 |
| 1 | 9.745144   | -1.313869 | -4.545762 |
| 1 | 9.923978   | 1.419529  | 3.939840  |
| 1 | 9.587194   | 0.807893  | -4.379528 |
| 1 | -9.587193  | 0.808032  | 4.379503  |
| 1 | -9.923974  | 1.419404  | -3.939897 |
| 1 | -9.745144  | -1.313727 | 4.545802  |
| 1 | -9.995337  | -3.327169 | 3.168933  |
| 1 | -10.072072 | 3.336340  | -3.017080 |
| 1 | -10.273940 | 4.365273  | -0.799947 |
| 1 | -10.214824 | -4.378403 | 1.297211  |
| 1 | -10.497062 | -4.182025 | -1.132372 |
| 1 | -10.440694 | 4.278591  | 1.337177  |
| 1 | -10.631347 | 2.904012  | 3.381936  |
| 1 | -10.720422 | -3.098532 | -2.967350 |
| 1 | -10.956667 | -0.904256 | -4.080877 |

Nanotube (7,5) u08v01  
B3LYP/STO-3G Energy: -7317.613093

|   |            |           |           |
|---|------------|-----------|-----------|
| 6 | -10.000252 | -0.239162 | -4.162487 |
| 6 | -9.875378  | -1.578068 | -3.870198 |
| 6 | -9.793120  | 2.290784  | 3.547050  |
| 6 | -9.665545  | 3.320227  | 2.640770  |
| 6 | -9.579606  | -3.800761 | -1.855062 |
| 6 | -9.442633  | -4.259072 | -0.557388 |
| 6 | -9.362517  | 4.302207  | -0.194854 |
| 6 | -9.227272  | 4.062150  | -1.552944 |
| 6 | -9.146962  | -3.654727 | 2.383411  |
| 6 | -9.015975  | -2.754288 | 3.432087  |
| 6 | -8.954455  | 2.007251  | -3.715538 |

|   |           |           |           |
|---|-----------|-----------|-----------|
| 6 | -8.838213 | 0.642811  | -4.098118 |
| 6 | -8.749722 | 0.114476  | 4.268946  |
| 6 | -8.633226 | 1.492249  | 3.927431  |
| 6 | -8.582004 | -2.160240 | -3.529997 |
| 6 | -8.444146 | -3.262282 | -2.578798 |
| 6 | -8.371927 | 3.665127  | 2.066141  |
| 6 | -8.231204 | 4.169733  | 0.697328  |
| 6 | -8.157057 | -4.245551 | 0.108677  |
| 6 | -8.016051 | -3.989679 | 1.550871  |
| 6 | -7.950561 | 3.702464  | -2.124594 |
| 6 | -7.824825 | 2.729503  | -3.237531 |
| 6 | -7.744234 | -2.151376 | 3.743922  |
| 6 | -7.621312 | -0.748172 | 4.218022  |
| 6 | -7.533390 | 0.023980  | -4.119975 |
| 6 | -7.408591 | -1.398496 | -3.860609 |
| 6 | -7.328480 | 2.041155  | 3.645198  |
| 6 | -7.201294 | 3.155417  | 2.724115  |
| 6 | -7.136163 | -3.584629 | -2.070696 |
| 6 | -6.994134 | -4.104414 | -0.722092 |
| 6 | -6.923957 | 4.189442  | 0.094193  |
| 6 | -6.784694 | 3.976844  | -1.335090 |
| 6 | -6.712100 | -3.687438 | 2.074996  |
| 6 | -6.575536 | -2.781821 | 3.199642  |
| 6 | -6.505459 | 2.204066  | -3.538008 |
| 6 | -6.363643 | 0.861603  | -4.036423 |
| 6 | -6.301322 | -0.142287 | 4.219305  |
| 6 | -6.159170 | 1.270246  | 3.987867  |
| 6 | -6.088643 | -1.948814 | -3.613782 |
| 6 | -5.951860 | -3.076649 | -2.742681 |
| 6 | -5.879005 | 3.512842  | 2.241048  |
| 6 | -5.739574 | 4.069706  | 0.929322  |
| 6 | -5.667631 | -4.168290 | -0.126657 |
| 6 | -5.526292 | -3.997425 | 1.288337  |
| 6 | -5.455237 | 3.731423  | -1.884864 |
| 6 | -5.318248 | 2.874717  | -3.028427 |
| 6 | -5.246892 | -2.291644 | 3.553611  |
| 6 | -5.112843 | -0.976718 | 4.116777  |
| 6 | -5.042449 | 0.255445  | -4.119745 |
| 6 | -4.909514 | -1.170243 | -3.950493 |
| 6 | -4.837665 | 1.839629  | 3.767367  |
| 6 | -4.702746 | 2.999125  | 2.917790  |
| 6 | -4.632851 | -3.465932 | -2.280452 |
| 6 | -4.492684 | -4.058221 | -0.967587 |
| 6 | -4.421621 | 4.178243  | 0.336184  |
| 6 | -4.282844 | 4.044967  | -1.101337 |
| 6 | -4.211200 | -3.790426 | 1.855644  |
| 6 | -4.074438 | -2.953404 | 3.034926  |
| 6 | -4.006009 | 2.402092  | -3.412076 |
| 6 | -3.869977 | 1.085447  | -4.009279 |
| 6 | -3.802689 | -0.375540 | 4.217710  |
| 6 | -3.667131 | 1.064684  | 4.083837  |
| 6 | -3.600254 | -1.743907 | -3.751566 |
| 6 | -3.464154 | -2.933354 | -2.932862 |
| 6 | -3.393308 | 3.398498  | 2.463520  |
| 6 | -3.254943 | 4.029756  | 1.165679  |
| 6 | -3.183791 | -4.169956 | -0.376238 |
| 6 | -3.043720 | -4.069700 | 1.061862  |
| 6 | -2.972112 | 3.838808  | -1.667845 |
| 6 | -2.833766 | 3.036860  | -2.861884 |
| 6 | -2.764616 | -2.488342 | 3.421965  |
| 6 | -2.628798 | -1.199065 | 4.057557  |
| 6 | -2.559305 | 0.485321  | -4.115287 |
| 6 | -2.424792 | -0.947389 | -4.026674 |
| 6 | -2.355139 | 1.639434  | 3.882755  |
| 6 | -2.218579 | 2.840379  | 3.098614  |
| 6 | -2.148082 | -3.334401 | -2.478601 |
| 6 | -2.008095 | -3.993866 | -1.206711 |
| 6 | -1.935989 | 4.151318  | 0.573908  |
| 6 | -1.795061 | 4.094824  | -0.857448 |
| 6 | -1.723839 | -3.875609 | 1.634953  |

|   |           |           |           |
|---|-----------|-----------|-----------|
| 6 | -1.584681 | -3.112858 | 2.848233  |
| 6 | -1.514508 | 2.579580  | -3.263428 |
| 6 | -1.378031 | 1.311927  | -3.935963 |
| 6 | -1.309764 | -0.602126 | 4.184441  |
| 6 | -1.174273 | 0.833919  | 4.141805  |
| 6 | -1.106732 | -1.531394 | -3.850746 |
| 6 | -0.970133 | -2.761086 | -3.104391 |
| 6 | -0.899721 | 3.262145  | 2.661573  |
| 6 | -0.760813 | 3.961608  | 1.402172  |
| 6 | -0.690029 | -4.140435 | -0.619634 |
| 6 | -0.549800 | -4.120246 | 0.822487  |
| 6 | -0.478506 | 3.926572  | -1.438477 |
| 6 | -0.340079 | 3.191673  | -2.681333 |
| 6 | -0.270700 | -2.675394 | 3.268788  |
| 6 | -0.135472 | -1.419680 | 3.985080  |
| 6 | -0.066827 | 0.721557  | -4.085692 |
| 6 | 0.066827  | -0.723750 | -4.085305 |
| 6 | 0.135473  | 1.421821  | 3.984319  |
| 6 | 0.270700  | 2.677150  | 3.267354  |
| 6 | 0.340079  | -3.193113 | -2.679623 |
| 6 | 0.478505  | -3.927344 | -1.436372 |
| 6 | 0.549799  | 4.120690  | 0.820278  |
| 6 | 0.690028  | 4.140102  | -0.621854 |
| 6 | 0.760813  | -3.960853 | 1.404295  |
| 6 | 0.899721  | -3.260713 | 2.663321  |
| 6 | 0.970133  | 2.759418  | -3.105869 |
| 6 | 1.106733  | 1.529326  | -3.851565 |
| 6 | 1.174275  | -0.831694 | 4.142250  |
| 6 | 1.309765  | 0.604373  | 4.184117  |
| 6 | 1.378031  | -1.314040 | -3.935259 |
| 6 | 1.514508  | -2.581333 | -3.262046 |
| 6 | 1.584680  | 3.114390  | 2.846565  |
| 6 | 1.723838  | 3.876489  | 1.632875  |
| 6 | 1.795059  | -4.095285 | -0.855253 |
| 6 | 1.935988  | -4.151008 | 0.576133  |
| 6 | 2.008095  | 3.993218  | -1.208852 |
| 6 | 2.148082  | 3.333069  | -2.480386 |
| 6 | 2.218579  | -2.838713 | 3.100134  |
| 6 | 2.355140  | -1.637348 | 3.883630  |
| 6 | 2.424793  | 0.945226  | -4.027179 |
| 6 | 2.559305  | -0.487531 | -4.115026 |
| 6 | 2.628799  | 1.201246  | 4.056913  |
| 6 | 2.764616  | 2.490182  | 3.420631  |
| 6 | 2.833765  | -3.038399 | -2.860257 |
| 6 | 2.972110  | -3.839706 | -1.665788 |
| 6 | 3.043718  | 4.070273  | 1.059680  |
| 6 | 3.183791  | 4.169755  | -0.378473 |
| 6 | 3.254943  | -4.029129 | 1.167838  |
| 6 | 3.393309  | -3.397173 | 2.465339  |
| 6 | 3.464155  | 2.931776  | -2.934431 |
| 6 | 3.600255  | 1.741891  | -3.752497 |
| 6 | 3.667132  | -1.062488 | 4.084403  |
| 6 | 3.802690  | 0.377807  | 4.217506  |
| 6 | 3.869977  | -1.087602 | -4.008697 |
| 6 | 4.006007  | -2.403927 | -3.410791 |
| 6 | 4.074437  | 2.955038  | 3.033344  |
| 6 | 4.211198  | 3.791427  | 1.853614  |
| 6 | 4.282842  | -4.045562 | -1.099170 |
| 6 | 4.421620  | -4.178064 | 0.338422  |
| 6 | 4.492684  | 4.057702  | -0.969761 |
| 6 | 4.632852  | 3.464705  | -2.282307 |
| 6 | 4.702747  | -2.997555 | 2.919392  |
| 6 | 4.837667  | -1.837602 | 3.768347  |
| 6 | 4.909516  | 1.168119  | -3.951115 |
| 6 | 5.042450  | -0.257660 | -4.119607 |
| 6 | 5.112844  | 0.978931  | 4.116251  |
| 6 | 5.246891  | 2.293557  | 3.552384  |
| 6 | 5.318246  | -2.876349 | -3.026890 |
| 6 | 5.455234  | -3.732442 | -1.882867 |
| 6 | 5.526291  | 3.998122  | 1.286196  |

|   |            |           |           |
|---|------------|-----------|-----------|
| 6 | 5.667631   | 4.168225  | -0.128890 |
| 6 | 5.739573   | -4.069207 | 0.931501  |
| 6 | 5.879006   | -3.511635 | 2.242925  |
| 6 | 5.951862   | 3.075171  | -2.744324 |
| 6 | 6.088645   | 1.946868  | -3.614819 |
| 6 | 6.159172   | -1.268101 | 3.988539  |
| 6 | 6.301323   | 0.144556  | 4.219223  |
| 6 | 6.363643   | -0.863776 | -4.035961 |
| 6 | 6.505457   | -2.205973 | -3.536831 |
| 6 | 6.575534   | 2.783547  | 3.198154  |
| 6 | 6.712098   | 3.688561  | 2.073023  |
| 6 | 6.784691   | -3.977568 | -1.332962 |
| 6 | 6.923955   | -4.189395 | 0.096435  |
| 6 | 6.994134   | 4.104027  | -0.724289 |
| 6 | 7.136165   | 3.583512  | -2.072611 |
| 6 | 7.201296   | -3.153948 | 2.725797  |
| 6 | 7.328483   | -2.039191 | 3.646282  |
| 6 | 7.408592   | 1.396415  | -3.861350 |
| 6 | 7.533391   | -0.026198 | -4.119958 |
| 6 | 7.621313   | 0.750443  | 4.217618  |
| 6 | 7.744233   | 2.153395  | 3.742773  |
| 6 | 7.824823   | -2.731251 | -3.236073 |
| 6 | 7.950558   | -3.703616 | -2.122615 |
| 6 | 8.016050   | 3.990522  | 1.548738  |
| 6 | 8.157057   | 4.245614  | 0.106405  |
| 6 | 8.231203   | -4.169361 | 0.699557  |
| 6 | 8.371928   | -3.664013 | 2.068096  |
| 6 | 8.444148   | 3.260888  | -2.580537 |
| 6 | 8.582007   | 2.158334  | -3.531143 |
| 6 | 8.633228   | -1.490133 | 3.928218  |
| 6 | 8.749723   | -0.112178 | 4.269002  |
| 6 | 8.838213   | -0.645019 | -4.097770 |
| 6 | 8.954455   | -2.009254 | -3.714460 |
| 6 | 9.015973   | 2.756144  | 3.430619  |
| 6 | 9.146960   | 3.656022  | 2.381461  |
| 6 | 9.227269   | -4.062995 | -1.550774 |
| 6 | 9.362515   | -4.302319 | -0.192555 |
| 6 | 9.442633   | 4.258773  | -0.559664 |
| 6 | 9.579608   | 3.799756  | -1.857089 |
| 6 | 9.665546   | -3.318800 | 2.642536  |
| 6 | 9.793122   | -2.288870 | 3.548262  |
| 6 | 9.875380   | 1.575978  | -3.871030 |
| 6 | 10.000253  | 0.236917  | -4.162606 |
| 1 | -10.993402 | 0.206154  | -4.313585 |
| 1 | -10.775956 | -2.200987 | -3.793941 |
| 1 | -10.787980 | 1.973541  | 3.889231  |
| 1 | -10.565984 | 3.824084  | 2.266298  |
| 1 | -10.583764 | -3.716266 | -2.289736 |
| 1 | -10.340857 | -4.528593 | 0.013073  |
| 1 | -10.365838 | 4.452546  | 0.223751  |
| 1 | -10.127623 | 4.026351  | -2.179905 |
| 1 | -10.149884 | -3.995762 | 2.096202  |
| 1 | -9.919670  | -2.404891 | 3.948097  |
| 1 | -9.963276  | 2.411806  | -3.563234 |
| 1 | -9.759014  | -0.312228 | 4.332281  |
| 1 | 9.759012   | 0.314558  | 4.332114  |
| 1 | 9.963283   | -2.413723 | -3.561923 |
| 1 | 9.919668   | 2.407026  | 3.946818  |
| 1 | 10.149880  | 3.996905  | 2.094070  |
| 1 | 10.127619  | -4.027533 | -2.177755 |
| 1 | 10.365836  | -4.452432 | 0.226130  |
| 1 | 10.340857  | 4.528602  | 0.010651  |
| 1 | 10.583768  | 3.715022  | -2.291716 |
| 1 | 10.565986  | -3.822857 | 2.268333  |
| 1 | 10.787983  | -1.971442 | 3.890270  |
| 1 | 10.775959  | 2.198937  | -3.795102 |
| 1 | 10.993404  | -0.208480 | -4.313464 |



Nanotube (7,5) u08v02  
B3LYP/STO-3G Energy: -7392.909326

|   |            |           |           |
|---|------------|-----------|-----------|
| 6 | -10.165641 | -3.971577 | -0.840383 |
| 6 | -10.041321 | -4.036169 | 0.528193  |
| 6 | -9.835351  | 4.130745  | -1.300275 |
| 6 | -9.717652  | 3.518075  | -2.527891 |
| 6 | -9.725702  | -2.664545 | 3.193948  |
| 6 | -9.572262  | -1.530746 | 3.970051  |
| 6 | -9.454342  | 1.024943  | -4.205055 |
| 6 | -9.340296  | -0.350637 | -4.322488 |
| 6 | -9.231786  | 1.462156  | 4.142371  |
| 6 | -9.081388  | 2.704855  | 3.543096  |
| 6 | -9.105916  | -2.974234 | -2.894991 |
| 6 | -8.999532  | -3.697341 | -1.676380 |
| 6 | -8.789861  | 4.249649  | 0.988295  |
| 6 | -8.672727  | 4.273140  | -0.430001 |
| 6 | -8.744961  | -3.875062 | 1.178233  |
| 6 | -8.597945  | -3.242113 | 2.487064  |
| 6 | -8.431276  | 3.030157  | -3.008859 |
| 6 | -8.309686  | 1.835958  | -3.848031 |
| 6 | -8.276685  | -0.902380 | 4.128542  |
| 6 | -8.114001  | 0.553927  | 4.252475  |
| 6 | -8.072824  | -1.015354 | -4.123063 |
| 6 | -7.966485  | -2.342538 | -3.470430 |
| 6 | -7.801701  | 3.142407  | 3.041838  |
| 6 | -7.665307  | 3.960081  | 1.809207  |
| 6 | -7.696886  | -3.897420 | -1.084484 |
| 6 | -7.573326  | -4.015556 | 0.356649  |
| 6 | -7.369815  | 4.121444  | -1.033257 |
| 6 | -7.252405  | 3.516812  | -2.347289 |
| 6 | -7.284020  | -2.853819 | 2.930027  |
| 6 | -7.125111  | -1.686649 | 3.779797  |
| 6 | -7.011480  | 1.238334  | -4.024066 |
| 6 | -6.894478  | -0.199675 | -4.186903 |
| 6 | -6.801269  | 1.118743  | 4.097479  |
| 6 | -6.644167  | 2.436785  | 3.512172  |
| 6 | -6.653665  | -2.788496 | -3.041368 |
| 6 | -6.523419  | -3.618022 | -1.872497 |
| 6 | -6.343265  | 4.097011  | 1.224385  |
| 6 | -6.198714  | 4.235067  | -0.200261 |
| 6 | -6.252326  | -3.937723 | 0.951715  |
| 6 | -6.107602  | -3.388991 | 2.265927  |
| 6 | -5.936679  | 3.121439  | -2.817362 |
| 6 | -5.815395  | 1.995896  | -3.693797 |
| 6 | -5.790910  | -1.147545 | 3.995431  |
| 6 | -5.628713  | 0.260955  | 4.194988  |
| 6 | -5.574523  | -0.814328 | -4.092201 |
| 6 | -5.457023  | -2.141046 | -3.558730 |
| 6 | -5.308495  | 2.884249  | 3.129672  |
| 6 | -5.159965  | 3.763557  | 2.004355  |
| 6 | -5.205455  | -3.873175 | -1.308235 |
| 6 | -5.074834  | -4.078481 | 0.112058  |
| 6 | -4.878175  | 4.146614  | -0.807166 |
| 6 | -4.751742  | 3.623498  | -2.145754 |
| 6 | -4.783169  | -3.061643 | 2.761169  |
| 6 | -4.626994  | -1.949424 | 3.672317  |
| 6 | -4.505776  | 1.430266  | -3.952499 |
| 6 | -4.389052  | 0.006155  | -4.194632 |
| 6 | -4.304009  | 0.842777  | 4.142308  |
| 6 | -4.146138  | 2.194624  | 3.637204  |
| 6 | -4.151476  | -2.653267 | -3.201482 |
| 6 | -4.028142  | -3.570052 | -2.082825 |
| 6 | -3.845001  | 3.994965  | 1.449384  |
| 6 | -3.705243  | 4.233761  | 0.023662  |
| 6 | -3.764418  | -4.053083 | 0.717485  |
| 6 | -3.621352  | -3.571501 | 2.078165  |
| 6 | -3.447390  | 3.267547  | -2.649772 |
| 6 | -3.326828  | 2.175684  | -3.595990 |
| 6 | -3.310384  | -1.426997 | 3.934893  |

|   |           |           |           |
|---|-----------|-----------|-----------|
| 6 | -3.149554 | -0.013742 | 4.209979  |
| 6 | -3.087663 | -0.614564 | -4.143819 |
| 6 | -2.969528 | -1.976818 | -3.675496 |
| 6 | -2.829010 | 2.668485  | 3.288689  |
| 6 | -2.677527 | 3.610974  | 2.204800  |
| 6 | -2.721327 | -3.845782 | -1.530572 |
| 6 | -2.590360 | -4.130076 | -0.122946 |
| 6 | -2.394448 | 4.166107  | -0.583291 |
| 6 | -2.265421 | 3.717005  | -1.946551 |
| 6 | -2.300978 | -3.255339 | 2.583060  |
| 6 | -2.146077 | -2.200404 | 3.549915  |
| 6 | -2.017354 | 1.615273  | -3.868098 |
| 6 | -1.898412 | 0.216196  | -4.183808 |
| 6 | -1.821402 | 0.570237  | 4.171514  |
| 6 | -1.661095 | 1.935599  | 3.746149  |
| 6 | -1.658077 | -2.501622 | -3.336961 |
| 6 | -1.534964 | -3.477046 | -2.283879 |
| 6 | -1.354121 | 3.863907  | 1.659999  |
| 6 | -1.212869 | 4.187605  | 0.262108  |
| 6 | -1.271562 | -4.128038 | 0.486393  |
| 6 | -1.128976 | -3.727309 | 1.866478  |
| 6 | -0.951771 | 3.381843  | -2.467196 |
| 6 | -0.829800 | 2.347418  | -3.469752 |
| 6 | -0.820025 | -1.690768 | 3.844739  |
| 6 | -0.659418 | -0.296058 | 4.199997  |
| 6 | -0.590830 | -0.409025 | -4.172592 |
| 6 | -0.472877 | -1.799377 | -3.781481 |
| 6 | -0.338155 | 2.434381  | 3.432507  |
| 6 | -0.185674 | 3.443400  | 2.401175  |
| 6 | -0.226983 | -3.791629 | -1.751929 |
| 6 | -0.098022 | -4.163273 | -0.354952 |
| 6 | 0.098019  | 4.163978  | -0.346581 |
| 6 | 0.226982  | 3.795148  | -1.744304 |
| 6 | 0.185673  | -3.448231 | 2.394249  |
| 6 | 0.338155  | -2.441288 | 3.427608  |
| 6 | 0.472880  | 1.806983  | -3.777858 |
| 6 | 0.590833  | 0.417419  | -4.171761 |
| 6 | 0.659420  | 0.287604  | 4.200583  |
| 6 | 0.820026  | 1.683025  | 3.848128  |
| 6 | 0.829802  | -2.340431 | -3.474460 |
| 6 | 0.951771  | -3.376872 | -2.473988 |
| 6 | 1.128975  | 3.723544  | 1.873966  |
| 6 | 1.271559  | 4.127051  | 0.494691  |
| 6 | 1.212867  | -4.188130 | 0.253688  |
| 6 | 1.354119  | -3.867247 | 1.652228  |
| 6 | 1.534964  | 3.481639  | -2.276885 |
| 6 | 1.658079  | 2.508334  | -3.331926 |
| 6 | 1.661096  | -1.943136 | 3.742250  |
| 6 | 1.821404  | -0.578631 | 4.170356  |
| 6 | 1.898415  | -0.207778 | -4.184229 |
| 6 | 2.017357  | -1.607487 | -3.871330 |
| 6 | 2.146078  | 2.193254  | 3.554327  |
| 6 | 2.300977  | 3.250133  | 2.589597  |
| 6 | 2.265420  | -3.713084 | -1.954018 |
| 6 | 2.394446  | -4.164932 | -0.591665 |
| 6 | 2.590357  | 4.130322  | -0.114642 |
| 6 | 2.721325  | 3.848862  | -1.522838 |
| 6 | 2.677526  | -3.615412 | 2.197538  |
| 6 | 2.829010  | -2.675103 | 3.283317  |
| 6 | 2.969530  | 1.984211  | -3.671512 |
| 6 | 3.087666  | 0.622900  | -4.142567 |
| 6 | 3.149556  | 0.005269  | 4.209991  |
| 6 | 3.310385  | 1.419074  | 3.937745  |
| 6 | 3.326830  | -2.168445 | -3.600348 |
| 6 | 3.447390  | -3.262211 | -2.656331 |
| 6 | 3.621350  | 3.567314  | 2.085339  |
| 6 | 3.764414  | 4.051638  | 0.725632  |
| 6 | 3.705241  | -4.233810 | 0.015150  |
| 6 | 3.844999  | -3.997885 | 1.441351  |
| 6 | 4.028141  | 3.574246  | -2.075644 |

|   |            |           |           |
|---|------------|-----------|-----------|
| 6 | 4.151477   | 2.659709  | -3.196140 |
| 6 | 4.146139   | -2.201942 | 3.632782  |
| 6 | 4.304010   | -0.851112 | 4.140598  |
| 6 | 4.389055   | 0.002284  | -4.194623 |
| 6 | 4.505779   | -1.422310 | -3.955354 |
| 6 | 4.626994   | 1.942030  | 3.676218  |
| 6 | 4.783168   | 3.056082  | 2.767313  |
| 6 | 4.751741   | -3.619178 | -2.153031 |
| 6 | 4.878173   | -4.144991 | -0.815499 |
| 6 | 5.074831   | 4.078259  | 0.120258  |
| 6 | 5.205453   | 3.875814  | -1.300446 |
| 6 | 5.159964   | -3.767595 | 1.996786  |
| 6 | 5.308495   | -2.890548 | 3.123866  |
| 6 | 5.457025   | 2.148206  | -3.554412 |
| 6 | 5.574526   | 0.822560  | -4.090543 |
| 6 | 5.628714   | -0.269396 | 4.194442  |
| 6 | 5.790911   | 1.139503  | 3.997716  |
| 6 | 5.815397   | -1.988460 | -3.697789 |
| 6 | 5.936679   | -3.115767 | -2.823624 |
| 6 | 6.107600   | 3.384430  | 2.272732  |
| 6 | 6.252323   | 3.935812  | 0.959630  |
| 6 | 6.198712   | -4.234669 | -0.208774 |
| 6 | 6.343264   | -4.099482 | 1.216147  |
| 6 | 6.523417   | 3.621798  | -1.865219 |
| 6 | 6.653665   | 2.794618  | -3.035752 |
| 6 | 6.644167   | -2.443853 | 3.507262  |
| 6 | 6.801270   | -1.126986 | 4.095211  |
| 6 | 6.894481   | 0.208099  | -4.186476 |
| 6 | 7.011482   | -1.230235 | -4.026531 |
| 6 | 7.125111   | 1.679040  | 3.783165  |
| 6 | 7.284020   | 2.847920  | 2.935749  |
| 6 | 7.252405   | -3.512089 | -2.354349 |
| 6 | 7.369813   | -4.119369 | -1.041540 |
| 6 | 7.573322   | 4.014848  | 0.364721  |
| 6 | 7.696884   | 3.899614  | -1.076646 |
| 6 | 7.665306   | -3.963725 | 1.801241  |
| 6 | 7.801700   | -3.148529 | 3.035512  |
| 6 | 7.966487   | 2.349521  | -3.465703 |
| 6 | 8.072827   | 1.023647  | -4.120995 |
| 6 | 8.114003   | -0.562483 | 4.251337  |
| 6 | 8.276686   | 0.894070  | 4.130330  |
| 6 | 8.309688   | -1.828213 | -3.851698 |
| 6 | 8.431276   | -3.024103 | -3.014936 |
| 6 | 8.597943   | 3.237108  | 2.493570  |
| 6 | 8.744957   | 3.872702  | 1.186020  |
| 6 | 8.672725   | -4.272280 | -0.438591 |
| 6 | 8.789862   | -4.251634 | 0.979748  |
| 6 | 8.999530   | 3.700727  | -1.668941 |
| 6 | 9.105917   | 2.980061  | -2.888996 |
| 6 | 9.081389   | -2.711982 | 3.537642  |
| 6 | 9.231787   | -1.470488 | 4.139408  |
| 6 | 9.340300   | 0.359332  | -4.321750 |
| 6 | 9.454345   | -1.016480 | -4.207088 |
| 6 | 9.572263   | 1.522752  | 3.973098  |
| 6 | 9.725703   | 2.658114  | 3.199282  |
| 6 | 9.717652   | -3.512994 | -2.534955 |
| 6 | 9.835350   | -4.128136 | -1.308577 |
| 6 | 10.041317  | 4.035129  | 0.536307  |
| 6 | 10.165638  | 3.973291  | -0.832395 |
| 1 | -11.159033 | -3.989887 | -1.309662 |
| 1 | -10.942624 | -4.111596 | 1.150179  |
| 1 | -10.825844 | 4.396935  | -0.905916 |
| 1 | -10.621420 | 3.301309  | -3.111946 |
| 1 | -10.735369 | -3.049004 | 3.000958  |
| 1 | -10.463074 | -1.035824 | 4.377948  |
| 1 | -10.450552 | 1.483889  | -4.242817 |
| 1 | -10.249781 | -0.952026 | -4.449514 |
| 1 | -10.240088 | 1.112085  | 4.398030  |
| 1 | -9.975517  | 3.307929  | 3.338598  |
| 1 | -10.110862 | -2.708379 | -3.246737 |

|   |           |           |           |
|---|-----------|-----------|-----------|
| 1 | -9.799668 | 4.217398  | 1.417206  |
| 1 | 9.799677  | -4.220224 | 1.408723  |
| 1 | 10.110869 | 2.714903  | -3.241268 |
| 1 | 9.975517  | -3.314643 | 3.331930  |
| 1 | 10.240090 | -1.120930 | 4.395765  |
| 1 | 10.249786 | 0.960975  | -4.447559 |
| 1 | 10.450554 | -1.475348 | -4.245773 |
| 1 | 10.463076 | 1.027007  | 4.379992  |
| 1 | 10.735369 | 3.042959  | 3.007064  |
| 1 | 10.621419 | -3.295057 | -3.118574 |
| 1 | 10.825842 | -4.395121 | -0.914754 |
| 1 | 10.942618 | 4.109311  | 1.158445  |
| 1 | 11.159031 | 3.992550  | -1.301636 |

Nanotube (7,5) u08v03  
B3LYP/STO-3G Energy: -7468.205252

|   |            |           |           |
|---|------------|-----------|-----------|
| 6 | -10.222920 | -3.736931 | -1.796336 |
| 6 | -10.086904 | -4.148397 | -0.491069 |
| 6 | -10.002367 | 4.221185  | -0.176861 |
| 6 | -9.885086  | 3.944642  | -1.520300 |
| 6 | -9.769408  | -3.500768 | 2.435689  |
| 6 | -9.626014  | -2.600365 | 3.474279  |
| 6 | -9.602060  | 1.964804  | -3.778009 |
| 6 | -9.471489  | 0.666713  | -4.242011 |
| 6 | -9.326216  | 0.255758  | 4.400320  |
| 6 | -9.197077  | 1.611779  | 4.137327  |
| 6 | -9.192593  | -2.230708 | -3.530917 |
| 6 | -9.066995  | -3.239318 | -2.539032 |
| 6 | -8.943235  | 3.763630  | 2.062199  |
| 6 | -8.835653  | 4.151116  | 0.697692  |
| 6 | -8.787382  | -4.138998 | 0.173616  |
| 6 | -8.638853  | -3.860254 | 1.599286  |
| 6 | -8.595536  | 3.612603  | -2.114058 |
| 6 | -8.464699  | 2.674410  | -3.229878 |
| 6 | -8.337792  | -2.012235 | 3.782197  |
| 6 | -8.194706  | -0.633989 | 4.272073  |
| 6 | -8.193546  | -0.009026 | -4.223435 |
| 6 | -8.065291  | -1.456350 | -3.931530 |
| 6 | -7.926258  | 2.182303  | 3.760872  |
| 6 | -7.808960  | 3.289476  | 2.778552  |
| 6 | -7.756798  | -3.565581 | -2.023767 |
| 6 | -7.620139  | -4.047036 | -0.661666 |
| 6 | -7.534609  | 4.177519  | 0.071394  |
| 6 | -7.418235  | 3.930902  | -1.353944 |
| 6 | -7.326796  | -3.578129 | 2.121891  |
| 6 | -7.177825  | -2.664355 | 3.241140  |
| 6 | -7.160192  | 2.160239  | -3.557939 |
| 6 | -7.026272  | 0.812952  | -4.082877 |
| 6 | -6.890946  | -0.028461 | 4.263147  |
| 6 | -6.756113  | 1.397749  | 4.033161  |
| 6 | -6.743908  | -1.978575 | -3.637021 |
| 6 | -6.593636  | -3.077261 | -2.719223 |
| 6 | -6.493104  | 3.591174  | 2.244414  |
| 6 | -6.359751  | 4.090862  | 0.901822  |
| 6 | -6.296002  | -4.103880 | -0.071842 |
| 6 | -6.148499  | -3.907037 | 1.338376  |
| 6 | -6.101139  | 3.686859  | -1.913685 |
| 6 | -5.971729  | 2.824694  | -3.049013 |
| 6 | -5.850081  | -2.177606 | 3.582184  |
| 6 | -5.706283  | -0.864786 | 4.134502  |
| 6 | -5.698241  | 0.213308  | -4.153230 |
| 6 | -5.559837  | -1.203088 | -3.976831 |
| 6 | -5.429590  | 1.947973  | 3.773510  |
| 6 | -5.300310  | 3.086631  | 2.909673  |
| 6 | -5.268000  | -3.448336 | -2.244051 |
| 6 | -5.123093  | -4.006682 | -0.924566 |
| 6 | -5.042072  | 4.178337  | 0.288042  |

|   |           |           |           |
|---|-----------|-----------|-----------|
| 6 | -4.917651 | 4.016398  | -1.139263 |
| 6 | -4.824495 | -3.695636 | 1.895363  |
| 6 | -4.677018 | -2.851979 | 3.059416  |
| 6 | -4.656282 | 2.362118  | -3.448110 |
| 6 | -4.523375 | 1.050107  | -4.047171 |
| 6 | -4.389676 | -0.268629 | 4.228159  |
| 6 | -4.253966 | 1.168653  | 4.085349  |
| 6 | -4.244563 | -1.771209 | -3.768487 |
| 6 | -4.100424 | -2.940652 | -2.921690 |
| 6 | -3.991693 | 3.471609  | 2.428215  |
| 6 | -3.864304 | 4.067416  | 1.110381  |
| 6 | -3.807689 | -4.116722 | -0.338009 |
| 6 | -3.660383 | -3.996105 | 1.099731  |
| 6 | -3.611851 | 3.819490  | -1.721907 |
| 6 | -3.484085 | 3.008106  | -2.916803 |
| 6 | -3.365506 | -2.394284 | 3.442821  |
| 6 | -3.222738 | -1.096684 | 4.071347  |
| 6 | -3.214179 | 0.455786  | -4.163466 |
| 6 | -3.075442 | -0.979606 | -4.060454 |
| 6 | -2.945983 | 1.736125  | 3.866911  |
| 6 | -2.814497 | 2.926015  | 3.058263  |
| 6 | -2.786189 | -3.329295 | -2.464233 |
| 6 | -2.639757 | -3.959802 | -1.175187 |
| 6 | -2.557069 | 4.175238  | 0.502199  |
| 6 | -2.431232 | 4.090151  | -0.931085 |
| 6 | -2.340983 | -3.798362 | 1.663004  |
| 6 | -2.193672 | -3.024102 | 2.867632  |
| 6 | -2.169983 | 2.554182  | -3.327769 |
| 6 | -2.035985 | 1.285404  | -3.993011 |
| 6 | -1.903859 | -0.502226 | 4.180342  |
| 6 | -1.765595 | 0.928518  | 4.118962  |
| 6 | -1.755365 | -1.554896 | -3.873388 |
| 6 | -1.611271 | -2.763599 | -3.104548 |
| 6 | -1.498506 | 3.328236  | 2.591531  |
| 6 | -1.370304 | 3.997166  | 1.321727  |
| 6 | -1.316082 | -4.090760 | -0.590749 |
| 6 | -1.167803 | -4.051293 | 0.843934  |
| 6 | -1.116408 | 3.916035  | -1.523910 |
| 6 | -0.988138 | 3.175415  | -2.757869 |
| 6 | -0.872492 | -2.585569 | 3.278027  |
| 6 | -0.729096 | -1.329108 | 3.980473  |
| 6 | -0.720131 | 0.696604  | -4.148638 |
| 6 | -0.581882 | -0.745032 | -4.129823 |
| 6 | -0.451302 | 1.511252  | 3.939961  |
| 6 | -0.319186 | 2.750459  | 3.199507  |
| 6 | -0.294195 | -3.184590 | -2.676533 |
| 6 | -0.148139 | -3.894157 | -1.419928 |
| 6 | -0.062316 | 4.147251  | 0.723013  |
| 6 | 0.062317  | 4.147275  | -0.722876 |
| 6 | 0.148139  | -3.894204 | 1.419800  |
| 6 | 0.294196  | -3.184679 | 2.676429  |
| 6 | 0.319186  | 2.750565  | -3.199416 |
| 6 | 0.451302  | 1.511383  | -3.939912 |
| 6 | 0.581882  | -0.745169 | 4.129799  |
| 6 | 0.720131  | 0.696467  | 4.148662  |
| 6 | 0.729096  | -1.328977 | -3.980516 |
| 6 | 0.872492  | -2.585461 | -3.278112 |
| 6 | 0.988138  | 3.175324  | 2.757974  |
| 6 | 1.116409  | 3.915984  | 1.524039  |
| 6 | 1.167803  | -4.051265 | -0.844067 |
| 6 | 1.316083  | -4.090779 | 0.590614  |
| 6 | 1.370304  | 3.997209  | -1.321595 |
| 6 | 1.498506  | 3.328322  | -2.591421 |
| 6 | 1.611271  | -2.763701 | 3.104457  |
| 6 | 1.755365  | -1.555024 | 3.873338  |
| 6 | 1.765595  | 0.928655  | -4.118931 |
| 6 | 1.903859  | -0.502088 | -4.180359 |
| 6 | 2.035984  | 1.285272  | 3.993053  |
| 6 | 2.169983  | 2.554072  | 3.327854  |
| 6 | 2.193673  | -3.024006 | -2.867732 |

|   |          |           |           |
|---|----------|-----------|-----------|
| 6 | 2.340984 | -3.798306 | -1.663129 |
| 6 | 2.431233 | 4.090119  | 0.931221  |
| 6 | 2.557069 | 4.175253  | -0.502061 |
| 6 | 2.639757 | -3.959840 | 1.175057  |
| 6 | 2.786189 | -3.329376 | 2.464123  |
| 6 | 2.814497 | 2.926116  | -3.058166 |
| 6 | 2.945982 | 1.736253  | -3.866854 |
| 6 | 3.075442 | -0.979740 | 4.060422  |
| 6 | 3.214179 | 0.455648  | 4.163482  |
| 6 | 3.222737 | -1.096549 | -4.071384 |
| 6 | 3.365506 | -2.394170 | -3.442900 |
| 6 | 3.484086 | 3.008009  | 2.916903  |
| 6 | 3.611852 | 3.819432  | 1.722033  |
| 6 | 3.660384 | -3.996067 | -1.099863 |
| 6 | 3.807689 | -4.116732 | 0.337873  |
| 6 | 3.864304 | 4.067451  | -1.110247 |
| 6 | 3.991693 | 3.471689  | -2.428100 |
| 6 | 4.100424 | -2.940748 | 2.921593  |
| 6 | 4.244563 | -1.771334 | 3.768430  |
| 6 | 4.253966 | 1.168789  | -4.085312 |
| 6 | 4.389675 | -0.268489 | -4.228169 |
| 6 | 4.523375 | 1.049972  | 4.047207  |
| 6 | 4.656282 | 2.362003  | 3.448189  |
| 6 | 4.677019 | -2.851877 | -3.059510 |
| 6 | 4.824496 | -3.695571 | -1.895484 |
| 6 | 4.917652 | 4.016359  | 1.139396  |
| 6 | 5.042073 | 4.178345  | -0.287904 |
| 6 | 5.123093 | -4.006711 | 0.924434  |
| 6 | 5.268000 | -3.448409 | 2.243938  |
| 6 | 5.300310 | 3.086727  | -2.909572 |
| 6 | 5.429589 | 1.948098  | -3.773448 |
| 6 | 5.559836 | -1.203220 | 3.976793  |
| 6 | 5.698240 | 0.213171  | 4.153239  |
| 6 | 5.706282 | -0.864649 | -4.134532 |
| 6 | 5.850081 | -2.177486 | -3.582257 |
| 6 | 5.971729 | 2.824591  | 3.049106  |
| 6 | 6.101140 | 3.686794  | 1.913806  |
| 6 | 6.148499 | -3.906989 | -1.338505 |
| 6 | 6.296002 | -4.103879 | 0.071707  |
| 6 | 6.359752 | 4.090889  | -0.901687 |
| 6 | 6.493104 | 3.591246  | -2.244297 |
| 6 | 6.593636 | -3.077350 | 2.719122  |
| 6 | 6.743907 | -1.978696 | 3.636957  |
| 6 | 6.756112 | 1.397883  | -4.033118 |
| 6 | 6.890944 | -0.028320 | -4.263151 |
| 6 | 7.026272 | 0.812816  | 4.082905  |
| 6 | 7.160191 | 2.160120  | 3.558011  |
| 6 | 7.177825 | -2.664245 | -3.241229 |
| 6 | 7.326796 | -3.578055 | -2.122009 |
| 6 | 7.418235 | 3.930853  | 1.354073  |
| 6 | 7.534609 | 4.177517  | -0.071257 |
| 6 | 7.620139 | -4.047054 | 0.661533  |
| 6 | 7.756798 | -3.565646 | 2.023650  |
| 6 | 7.808959 | 3.289567  | -2.778445 |
| 6 | 7.926257 | 2.182427  | -3.760804 |
| 6 | 8.065290 | -1.456480 | 3.931484  |
| 6 | 8.193546 | -0.009166 | 4.223438  |
| 6 | 8.194705 | -0.633846 | -4.272098 |
| 6 | 8.337791 | -2.012109 | -3.782265 |
| 6 | 8.464699 | 2.674301  | 3.229967  |
| 6 | 8.595537 | 3.612530  | 2.114177  |
| 6 | 8.638853 | -3.860196 | -1.599413 |
| 6 | 8.787383 | -4.138987 | -0.173752 |
| 6 | 8.835653 | 4.151133  | -0.697555 |
| 6 | 8.943234 | 3.763694  | -2.062076 |
| 6 | 9.066995 | -3.239400 | 2.538926  |
| 6 | 9.192592 | -2.230824 | 3.530847  |
| 6 | 9.197076 | 1.611917  | -4.137279 |
| 6 | 9.326214 | 0.255904  | -4.400317 |
| 6 | 9.471488 | 0.666571  | 4.242037  |

|   |            |           |           |
|---|------------|-----------|-----------|
| 6 | 9.602059   | 1.964678  | 3.778076  |
| 6 | 9.626014   | -2.600247 | -3.474366 |
| 6 | 9.769408   | -3.500683 | -2.435804 |
| 6 | 9.885087   | 3.944585  | 1.520429  |
| 6 | 10.002368  | 4.221171  | 0.176999  |
| 6 | 10.086904  | -4.148407 | 0.490932  |
| 6 | 10.222920  | -3.736986 | 1.796213  |
| 1 | -11.219552 | -3.650163 | -2.250955 |
| 1 | -10.981898 | -4.395577 | 0.094399  |
| 1 | -10.993327 | 4.365373  | 0.275569  |
| 1 | -10.789612 | 3.873421  | -2.138091 |
| 1 | -10.774711 | -3.840511 | 2.155767  |
| 1 | -10.520174 | -2.240775 | 3.999708  |
| 1 | -10.604021 | 2.404784  | -3.694591 |
| 1 | -10.373828 | 0.104650  | -4.515635 |
| 1 | -10.327687 | -0.163332 | 4.561683  |
| 1 | -10.100573 | 2.233892  | 4.096612  |
| 1 | -10.203660 | -1.898452 | -3.799113 |
| 1 | -9.949508  | 3.609082  | 2.472246  |
| 1 | 9.949505   | 3.609160  | -2.472128 |
| 1 | 10.203657  | -1.898579 | 3.799055  |
| 1 | 10.100572  | 2.234028  | -4.096544 |
| 1 | 10.327685  | -0.163180 | -4.561692 |
| 1 | 10.373826  | 0.104500  | 4.515644  |
| 1 | 10.604020  | 2.404660  | 3.694673  |
| 1 | 10.520173  | -2.240640 | -3.999783 |
| 1 | 10.774711  | -3.840434 | -2.155893 |
| 1 | 10.789612  | 3.873342  | 2.138218  |
| 1 | 10.993328  | 4.365371  | -0.275426 |
| 1 | 10.981899  | -4.395564 | -0.094545 |
| 1 | 11.219552  | -3.650231 | 2.250834  |

Nanotube (7,5) u08v04  
B3LYP/STO-3G Energy: -7543.500939

|   |            |           |           |
|---|------------|-----------|-----------|
| 6 | -10.348107 | -3.054145 | -2.748298 |
| 6 | -10.229245 | -3.788218 | -1.591707 |
| 6 | -10.061287 | 4.218913  | 0.854968  |
| 6 | -9.932261  | 4.295068  | -0.513077 |
| 6 | -9.933796  | -3.918138 | 1.405348  |
| 6 | -9.791527  | -3.316193 | 2.640697  |
| 6 | -9.645986  | 2.956867  | -3.200589 |
| 6 | -9.524517  | 1.819574  | -3.980196 |
| 6 | -9.472828  | -0.796208 | 4.268977  |
| 6 | -9.327788  | 0.579730  | 4.362603  |
| 6 | -9.284458  | -1.166781 | -4.031197 |
| 6 | -9.179507  | -2.396768 | -3.330522 |
| 6 | -9.031009  | 3.187895  | 2.909207  |
| 6 | -8.904666  | 3.910763  | 1.691540  |
| 6 | -8.935936  | -3.965820 | -0.937613 |
| 6 | -8.798418  | -4.064122 | 0.511858  |
| 6 | -8.639490  | 4.109056  | -1.162312 |
| 6 | -8.506563  | 3.487174  | -2.479504 |
| 6 | -8.500073  | -2.841638 | 3.097787  |
| 6 | -8.348309  | -1.637494 | 3.925001  |
| 6 | -8.253680  | 1.144482  | -4.125331 |
| 6 | -8.144215  | -0.330031 | -4.212782 |
| 6 | -8.046928  | 1.212312  | 4.154115  |
| 6 | -7.908501  | 2.531962  | 3.489560  |
| 6 | -7.877670  | -2.861646 | -2.907635 |
| 6 | -7.759408  | -3.677982 | -1.713895 |
| 6 | -7.596356  | 4.081201  | 1.103175  |
| 6 | -7.466943  | 4.207039  | -0.336713 |
| 6 | -7.488491  | -3.942172 | 1.098582  |
| 6 | -7.341246  | -3.347847 | 2.415907  |
| 6 | -7.203946  | 3.057598  | -2.918884 |
| 6 | -7.079048  | 1.888137  | -3.770872 |
| 6 | -7.038576  | -1.065993 | 4.081685  |

|   |           |           |           |
|---|-----------|-----------|-----------|
| 6 | -6.887543 | 0.370039  | 4.226112  |
| 6 | -6.831851 | -0.927648 | -4.053695 |
| 6 | -6.702721 | -2.226939 | -3.447140 |
| 6 | -6.584548 | 2.944957  | 3.061528  |
| 6 | -6.431749 | 3.770299  | 1.892736  |
| 6 | -6.442116 | -3.901013 | -1.149389 |
| 6 | -6.306266 | -4.073561 | 0.265203  |
| 6 | -6.146819 | 4.097412  | -0.930044 |
| 6 | -6.014221 | 3.553252  | -2.247318 |
| 6 | -6.012422 | -2.980500 | 2.879239  |
| 6 | -5.861178 | -1.855368 | 3.750707  |
| 6 | -5.757260 | 1.309101  | -3.982442 |
| 6 | -5.636176 | -0.106345 | -4.174569 |
| 6 | -5.553349 | 0.952204  | 4.125912  |
| 6 | -5.403951 | 2.271873  | 3.584346  |
| 6 | -5.386057 | -2.724457 | -3.073802 |
| 6 | -5.259861 | -3.603207 | -1.940913 |
| 6 | -5.106661 | 3.995089  | 1.331790  |
| 6 | -4.968098 | 4.201662  | -0.087464 |
| 6 | -4.985274 | -4.027281 | 0.866844  |
| 6 | -4.840448 | -3.512033 | 2.208286  |
| 6 | -4.699041 | 3.190290  | -2.741074 |
| 6 | -4.573926 | 2.075303  | -3.655402 |
| 6 | -4.539070 | -1.318963 | 4.003440  |
| 6 | -4.387931 | 0.104143  | 4.236193  |
| 6 | -4.328897 | -0.726307 | -4.110159 |
| 6 | -4.205993 | -2.075089 | -3.591535 |
| 6 | -4.086035 | 2.752055  | 3.228401  |
| 6 | -3.938496 | 3.663381  | 2.108494  |
| 6 | -3.951031 | -3.876757 | -1.393144 |
| 6 | -3.816197 | -4.129063 | 0.028426  |
| 6 | -3.657506 | 4.143550  | -0.690978 |
| 6 | -3.525176 | 3.663237  | -2.052603 |
| 6 | -3.527879 | -3.183999 | 2.705423  |
| 6 | -3.378594 | -2.093107 | 3.647516  |
| 6 | -3.269912 | 1.513792  | -3.911598 |
| 6 | -3.148200 | 0.098383  | -4.181348 |
| 6 | -3.072667 | 0.693001  | 4.182097  |
| 6 | -2.921379 | 2.049592  | 3.707727  |
| 6 | -2.900914 | -2.585813 | -3.241131 |
| 6 | -2.773803 | -3.526853 | -2.154908 |
| 6 | -2.624241 | 3.907353  | 1.558810  |
| 6 | -2.483215 | 4.188423  | 0.151842  |
| 6 | -2.500660 | -4.097733 | 0.632344  |
| 6 | -2.357063 | -3.658676 | 1.995845  |
| 6 | -2.212031 | 3.311859  | -2.555403 |
| 6 | -2.084827 | 2.255058  | -3.523673 |
| 6 | -2.055472 | -1.562279 | 3.914664  |
| 6 | -1.902910 | -0.166342 | 4.225594  |
| 6 | -1.837116 | -0.523154 | -4.139884 |
| 6 | -1.714094 | -1.890359 | -3.707270 |
| 6 | -1.597135 | 2.542360  | 3.370321  |
| 6 | -1.448628 | 3.511188  | 2.315520  |
| 6 | -1.457475 | -3.818930 | -1.614173 |
| 6 | -1.322149 | -4.147151 | -0.216645 |
| 6 | -1.163603 | 4.152324  | -0.455122 |
| 6 | -1.029363 | 3.748951  | -1.834614 |
| 6 | -1.034961 | -3.354669 | 2.513178  |
| 6 | -0.885983 | -2.323544 | 3.515588  |
| 6 | -0.773613 | 1.707845  | -3.815213 |
| 6 | -0.651569 | 0.310346  | -4.169668 |
| 6 | -0.580760 | 0.427388  | 4.213398  |
| 6 | -0.429135 | 1.813604  | 3.820072  |
| 6 | -0.405516 | -2.424896 | -3.393268 |
| 6 | -0.279125 | -3.432757 | -2.359341 |
| 6 | -0.131904 | 3.793735  | 1.785853  |
| 6 | 0.009424  | 4.157948  | 0.388935  |
| 6 | -0.009424 | -4.157950 | 0.388917  |
| 6 | 0.131904  | -3.793744 | 1.785836  |
| 6 | 0.279125  | 3.432769  | -2.359327 |



|   |          |           |           |
|---|----------|-----------|-----------|
| 6 | 0.405516 | 2.424913  | -3.393257 |
| 6 | 0.429135 | -1.813624 | 3.820065  |
| 6 | 0.580759 | -0.427409 | 4.213396  |
| 6 | 0.651569 | -0.310326 | -4.169669 |
| 6 | 0.773613 | -1.707826 | -3.815220 |
| 6 | 0.885983 | 2.323527  | 3.515598  |
| 6 | 1.034961 | 3.354656  | 2.513192  |
| 6 | 1.029363 | -3.748942 | -1.834630 |
| 6 | 1.163603 | -4.152322 | -0.455140 |
| 6 | 1.322149 | 4.147152  | -0.216627 |
| 6 | 1.457475 | 3.818938  | -1.614156 |
| 6 | 1.448628 | -3.511200 | 2.315505  |
| 6 | 1.597135 | -2.542377 | 3.370311  |
| 6 | 1.714094 | 1.890377  | -3.707262 |
| 6 | 1.837116 | 0.523174  | -4.139881 |
| 6 | 1.902910 | 0.166322  | 4.225595  |
| 6 | 2.055472 | 1.562260  | 3.914671  |
| 6 | 2.084827 | -2.255041 | -3.523682 |
| 6 | 2.212032 | -3.311846 | -2.555417 |
| 6 | 2.357062 | 3.658666  | 1.995862  |
| 6 | 2.500660 | 4.097730  | 0.632363  |
| 6 | 2.483215 | -4.188424 | 0.151823  |
| 6 | 2.624241 | -3.907361 | 1.558793  |
| 6 | 2.773804 | 3.526864  | -2.154892 |
| 6 | 2.900915 | 2.585829  | -3.241119 |
| 6 | 2.921379 | -2.049611 | 3.707718  |
| 6 | 3.072667 | -0.693022 | 4.182094  |
| 6 | 3.148200 | -0.098363 | -4.181347 |
| 6 | 3.269912 | -1.513773 | -3.911603 |
| 6 | 3.378594 | 2.093089  | 3.647525  |
| 6 | 3.527879 | 3.183986  | 2.705438  |
| 6 | 3.525176 | -3.663227 | -2.052618 |
| 6 | 3.657506 | -4.143547 | -0.690996 |
| 6 | 3.816197 | 4.129063  | 0.028445  |
| 6 | 3.951032 | 3.876764  | -1.393125 |
| 6 | 3.938496 | -3.663391 | 2.108477  |
| 6 | 4.086035 | -2.752071 | 3.228389  |
| 6 | 4.205993 | 2.075106  | -3.591525 |
| 6 | 4.328897 | 0.726327  | -4.110155 |
| 6 | 4.387931 | -0.104163 | 4.236193  |
| 6 | 4.539070 | 1.318944  | 4.003447  |
| 6 | 4.573926 | -2.075285 | -3.655410 |
| 6 | 4.699041 | -3.190277 | -2.741088 |
| 6 | 4.840447 | 3.512022  | 2.208302  |
| 6 | 4.985274 | 4.027276  | 0.866863  |
| 6 | 4.968099 | -4.201661 | -0.087483 |
| 6 | 5.106662 | -3.995096 | 1.331772  |
| 6 | 5.259861 | 3.603216  | -1.940895 |
| 6 | 5.386057 | 2.724472  | -3.073789 |
| 6 | 5.403951 | -2.271891 | 3.584336  |
| 6 | 5.553349 | -0.952223 | 4.125908  |
| 6 | 5.636176 | 0.106365  | -4.174568 |
| 6 | 5.757260 | -1.309081 | -3.982448 |
| 6 | 5.861177 | 1.855350  | 3.750717  |
| 6 | 6.012422 | 2.980486  | 2.879254  |
| 6 | 6.014221 | -3.553242 | -2.247334 |
| 6 | 6.146819 | -4.097408 | -0.930063 |
| 6 | 6.306266 | 4.073560  | 0.265223  |
| 6 | 6.442116 | 3.901018  | -1.149370 |
| 6 | 6.431750 | -3.770308 | 1.892719  |
| 6 | 6.584548 | -2.944972 | 3.061515  |
| 6 | 6.702721 | 2.226956  | -3.447129 |
| 6 | 6.831851 | 0.927668  | -4.053692 |
| 6 | 6.887543 | -0.370059 | 4.226111  |
| 6 | 7.038575 | 1.065974  | 4.081691  |
| 6 | 7.079048 | -1.888119 | -3.770881 |
| 6 | 7.203946 | -3.057585 | -2.918899 |
| 6 | 7.341245 | 3.347836  | 2.415925  |
| 6 | 7.488490 | 3.942167  | 1.098601  |
| 6 | 7.466943 | -4.207037 | -0.336732 |

|   |            |           |           |
|---|------------|-----------|-----------|
| 6 | 7.596357   | -4.081205 | 1.103156  |
| 6 | 7.759408   | 3.677990  | -1.713877 |
| 6 | 7.877670   | 2.861660  | -2.907622 |
| 6 | 7.908501   | -2.531979 | 3.489549  |
| 6 | 8.046928   | -1.212332 | 4.154109  |
| 6 | 8.144214   | 0.330052  | -4.212785 |
| 6 | 8.253680   | -1.144462 | -4.125339 |
| 6 | 8.348308   | 1.637477  | 3.925011  |
| 6 | 8.500072   | 2.841624  | 3.097802  |
| 6 | 8.506563   | -3.487164 | -2.479522 |
| 6 | 8.639490   | -4.109050 | -1.162333 |
| 6 | 8.798418   | 4.064119  | 0.511879  |
| 6 | 8.935936   | 3.965824  | -0.937593 |
| 6 | 8.904666   | -3.910770 | 1.691522  |
| 6 | 9.031009   | -3.187908 | 2.909192  |
| 6 | 9.179506   | 2.396786  | -3.330514 |
| 6 | 9.284457   | 1.166803  | -4.031197 |
| 6 | 9.327788   | -0.579750 | 4.362602  |
| 6 | 9.472827   | 0.796189  | 4.268983  |
| 6 | 9.524517   | -1.819559 | -3.980210 |
| 6 | 9.645986   | -2.956856 | -3.200608 |
| 6 | 9.791527   | 3.316182  | 2.640715  |
| 6 | 9.933796   | 3.918132  | 1.405368  |
| 6 | 9.932261   | -4.295064 | -0.513099 |
| 6 | 10.061288  | -4.218914 | 0.854947  |
| 6 | 10.229245  | 3.788224  | -1.591687 |
| 6 | 10.348107  | 3.054158  | -2.748284 |
| 1 | -11.339136 | -2.841589 | -3.172761 |
| 1 | -11.132322 | -4.166738 | -1.095654 |
| 1 | -11.055378 | 4.255978  | 1.321786  |
| 1 | -10.830435 | 4.397782  | -1.135676 |
| 1 | -10.939464 | -4.163748 | 1.040990  |
| 1 | -10.686786 | -3.093587 | 3.235550  |
| 1 | -10.643711 | 3.374971  | -3.015648 |
| 1 | -10.429545 | 1.358583  | -4.396628 |
| 1 | -10.479706 | -1.230937 | 4.311428  |
| 1 | -10.224314 | 1.202758  | 4.476909  |
| 1 | -10.288950 | -0.763705 | -4.212736 |
| 1 | -10.042970 | 2.946075  | 3.258470  |
| 1 | 10.042975  | -2.946085 | 3.258456  |
| 1 | 10.288959  | 0.763721  | -4.212728 |
| 1 | 10.224314  | -1.202778 | 4.476905  |
| 1 | 10.479705  | 1.230918  | 4.311441  |
| 1 | 10.429544  | -1.358570 | -4.396645 |
| 1 | 10.643708  | -3.374964 | -3.015673 |
| 1 | 10.686785  | 3.093573  | 3.235568  |
| 1 | 10.939463  | 4.163744  | 1.041012  |
| 1 | 10.830435  | -4.397778 | -1.135699 |
| 1 | 11.055379  | -4.255980 | 1.321765  |
| 1 | 11.132322  | 4.166743  | -1.095633 |
| 1 | 11.339136  | 2.841605  | -3.172748 |

Nanotube (7,5) u08v05  
B3LYP/STO-3G Energy: -7618.796310

|   |           |           |           |
|---|-----------|-----------|-----------|
| 6 | 10.463433 | -2.324791 | 3.361820  |
| 6 | 10.325326 | -3.329266 | 2.433512  |
| 6 | 10.187699 | 3.780042  | -1.978571 |
| 6 | 10.075131 | 4.206583  | -0.675302 |
| 6 | 9.991651  | -4.222490 | -0.426637 |
| 6 | 9.838210  | -3.956967 | -1.773249 |
| 6 | 9.809724  | 3.607648  | 2.268597  |
| 6 | 9.688877  | 2.709903  | 3.314603  |
| 6 | 9.518364  | -1.935987 | -3.990015 |
| 6 | 9.383091  | -0.628792 | -4.431122 |
| 6 | 9.428415  | -0.161571 | 4.129005  |
| 6 | 9.306423  | -1.527996 | 3.767676  |
| 6 | 9.125082  | 2.267221  | -3.689478 |

|   |          |           |           |
|---|----------|-----------|-----------|
| 6 | 9.018840 | 3.278979  | -2.697353 |
| 6 | 9.022504 | -3.655724 | 1.859505  |
| 6 | 8.866231 | -4.121466 | 0.486400  |
| 6 | 8.788244 | 4.206825  | 0.012169  |
| 6 | 8.665642 | 3.945956  | 1.445253  |
| 6 | 8.544218 | -3.601534 | -2.323684 |
| 6 | 8.391244 | -2.648926 | -3.429894 |
| 6 | 8.414431 | 2.106526  | 3.639193  |
| 6 | 8.295561 | 0.705454  | 4.101964  |
| 6 | 8.109450 | 0.050181  | -4.378336 |
| 6 | 7.989845 | 1.496643  | -4.072581 |
| 6 | 7.995957 | -2.073236 | 3.491570  |
| 6 | 7.857430 | -3.167164 | 2.548595  |
| 6 | 7.718574 | 3.609384  | -2.160628 |
| 6 | 7.606785 | 4.102213  | -0.800415 |
| 6 | 7.549719 | -4.141742 | -0.098717 |
| 6 | 7.390113 | -3.904158 | -1.522988 |
| 6 | 7.364833 | 3.657132  | 1.992508  |
| 6 | 7.241096 | 2.746508  | 3.117240  |
| 6 | 7.083964 | -2.122851 | -3.715043 |
| 6 | 6.942546 | -0.770058 | -4.221333 |
| 6 | 6.977537 | 0.099976  | 4.114558  |
| 6 | 6.832264 | -1.310263 | 3.862520  |
| 6 | 6.674761 | 2.020280  | -3.752963 |
| 6 | 6.542550 | 3.119480  | -2.833437 |
| 6 | 6.532177 | -3.514868 | 2.073933  |
| 6 | 6.377483 | -4.042988 | 0.752349  |
| 6 | 6.293163 | 4.162518  | -0.186636 |
| 6 | 6.171457 | 3.975573  | 1.227223  |
| 6 | 6.058669 | -3.653534 | -2.051293 |
| 6 | 5.904941 | -2.787801 | -3.180304 |
| 6 | 5.917969 | 2.253631  | 3.481816  |
| 6 | 5.789064 | 0.936537  | 4.031428  |
| 6 | 5.614668 | -0.167188 | -4.260063 |
| 6 | 5.482614 | 1.248265  | -4.074101 |
| 6 | 5.507832 | -1.873896 | 3.642174  |
| 6 | 5.361814 | -3.011966 | 2.774638  |
| 6 | 5.226090 | 3.494875  | -2.336543 |
| 6 | 5.105468 | 4.059291  | -1.017166 |
| 6 | 5.049194 | -4.138610 | 0.172214  |
| 6 | 4.890927 | -3.982419 | -1.253842 |
| 6 | 4.858918 | 3.763743  | 1.809437  |
| 6 | 4.735764 | 2.922025  | 2.979274  |
| 6 | 4.583350 | -2.319143 | -3.547947 |
| 6 | 4.440574 | -1.002885 | -4.136516 |
| 6 | 4.476170 | 0.333549  | 4.140667  |
| 6 | 4.337921 | -1.101462 | 3.987916  |
| 6 | 4.172563 | 1.818440  | -3.841225 |
| 6 | 4.045789 | 2.987900  | -2.992214 |
| 6 | 4.044103 | -3.404878 | 2.329160  |
| 6 | 3.889715 | -4.011440 | 1.021391  |
| 6 | 3.801134 | 4.171994  | -0.406830 |
| 6 | 3.680471 | 4.057138  | 1.033360  |
| 6 | 3.574087 | -3.778824 | -1.804940 |
| 6 | 3.420958 | -2.963830 | -2.993342 |
| 6 | 3.430608 | 2.457966  | 3.383018  |
| 6 | 3.302071 | 1.160321  | 4.008738  |
| 6 | 3.130702 | -0.405634 | -4.223249 |
| 6 | 2.996477 | 1.029321  | -4.113446 |
| 6 | 3.025732 | -1.672784 | 3.794587  |
| 6 | 2.879249 | -2.860654 | 2.988270  |
| 6 | 2.740462 | 3.379927  | -2.512160 |
| 6 | 2.618002 | 4.013104  | -1.222402 |
| 6 | 2.567519 | -4.122851 | 0.443407  |
| 6 | 2.409363 | -4.044245 | -0.985630 |
| 6 | 2.370917 | 3.858848  | 1.621020  |
| 6 | 2.246705 | 3.085915  | 2.828271  |
| 6 | 2.099106 | -2.504354 | -3.373117 |
| 6 | 1.953832 | -1.233754 | -4.031180 |
| 6 | 1.986528 | 0.561694  | 4.140207  |

|   |           |           |           |
|---|-----------|-----------|-----------|
| 6 | 1.849255  | -0.869042 | 4.076603  |
| 6 | 1.681062  | 1.607098  | -3.902026 |
| 6 | 1.553185  | 2.815931  | -3.131285 |
| 6 | 1.554784  | -3.269306 | 2.554154  |
| 6 | 1.399743  | -3.942089 | 1.289526  |
| 6 | 1.305331  | 4.146653  | -0.614243 |
| 6 | 1.183175  | 4.109045  | 0.822584  |
| 6 | 1.082655  | -3.866613 | -1.548895 |
| 6 | 0.928366  | -3.124010 | -2.778122 |
| 6 | 0.934274  | 2.643679  | 3.261307  |
| 6 | 0.806268  | 1.386315  | 3.964191  |
| 6 | 0.636351  | -0.641784 | -4.158287 |
| 6 | 0.501022  | 0.799207  | -4.136780 |
| 6 | 0.532942  | -1.454432 | 3.924635  |
| 6 | 0.387521  | -2.693824 | 3.188475  |
| 6 | 0.244677  | 3.240283  | -2.680210 |
| 6 | 0.122312  | 3.950231  | -1.422315 |
| 6 | 0.078685  | -4.095215 | 0.720756  |
| 6 | -0.078685 | -4.095230 | -0.720673 |
| 6 | -0.122312 | 3.950259  | 1.422232  |
| 6 | -0.244677 | 3.240337  | 2.680141  |
| 6 | -0.387521 | -2.693888 | -3.188420 |
| 6 | -0.532942 | -1.454511 | -3.924606 |
| 6 | -0.501022 | 0.799290  | 4.136762  |
| 6 | -0.636351 | -0.641700 | 4.158299  |
| 6 | -0.806269 | 1.386235  | -3.964221 |
| 6 | -0.934274 | 2.643613  | -3.261363 |
| 6 | -0.928367 | -3.123954 | 2.778186  |
| 6 | -1.082655 | -3.866583 | 1.548974  |
| 6 | -1.183175 | 4.109029  | -0.822670 |
| 6 | -1.305331 | 4.146665  | 0.614156  |
| 6 | -1.399743 | -3.942115 | -1.289446 |
| 6 | -1.554784 | -3.269357 | -2.554088 |
| 6 | -1.553185 | 2.815994  | 3.131226  |
| 6 | -1.681062 | 1.607177  | 3.901992  |
| 6 | -1.849256 | -0.869125 | -4.076586 |
| 6 | -1.986529 | 0.561610  | -4.140219 |
| 6 | -1.953832 | -1.233673 | 4.031204  |
| 6 | -2.099106 | -2.504286 | 3.373167  |
| 6 | -2.246705 | 3.085858  | -2.828335 |
| 6 | -2.370917 | 3.858815  | -1.621100 |
| 6 | -2.409363 | -4.044226 | 0.985712  |
| 6 | -2.567519 | -4.122860 | -0.443323 |
| 6 | -2.618002 | 4.013128  | 1.222318  |
| 6 | -2.740462 | 3.379977  | 2.512089  |
| 6 | -2.879249 | -2.860714 | -2.988212 |
| 6 | -3.025733 | -1.672861 | -3.794553 |
| 6 | -2.996477 | 1.029404  | 4.113423  |
| 6 | -3.130702 | -0.405549 | 4.223256  |
| 6 | -3.302071 | 1.160239  | -4.008762 |
| 6 | -3.430609 | 2.457897  | -3.383069 |
| 6 | -3.420959 | -2.963770 | 2.993402  |
| 6 | -3.574087 | -3.778789 | 1.805016  |
| 6 | -3.680471 | 4.057116  | -1.033443 |
| 6 | -3.801134 | 4.172002  | 0.406744  |
| 6 | -3.889715 | -4.011462 | -1.021309 |
| 6 | -4.044103 | -3.404926 | -2.329091 |
| 6 | -4.045788 | 2.987960  | 2.992152  |
| 6 | -4.172562 | 1.818518  | 3.841187  |
| 6 | -4.337922 | -1.101544 | -3.987894 |
| 6 | -4.476171 | 0.333464  | -4.140674 |
| 6 | -4.440574 | -1.002801 | 4.136535  |
| 6 | -4.583350 | -2.319071 | 3.547993  |
| 6 | -4.735765 | 2.921964  | -2.979334 |
| 6 | -4.858919 | 3.763706  | -1.809514 |
| 6 | -4.890927 | -3.982395 | 1.253923  |
| 6 | -5.049194 | -4.138615 | -0.172130 |
| 6 | -5.105468 | 4.059311  | 1.017082  |
| 6 | -5.226090 | 3.494923  | 2.336472  |
| 6 | -5.361813 | -3.012024 | -2.774577 |

|   |            |           |           |
|---|------------|-----------|-----------|
| 6 | -5.507832  | -1.873971 | -3.642136 |
| 6 | -5.482613  | 1.248349  | 4.074075  |
| 6 | -5.614667  | -0.167101 | 4.260066  |
| 6 | -5.789065  | 0.936454  | -4.031447 |
| 6 | -5.917971  | 2.253559  | -3.481861 |
| 6 | -5.904941  | -2.787735 | 3.180360  |
| 6 | -6.058669  | -3.653492 | 2.051366  |
| 6 | -6.171458  | 3.975546  | -1.227303 |
| 6 | -6.293164  | 4.162521  | 0.186551  |
| 6 | -6.377483  | -4.043005 | -0.752267 |
| 6 | -6.532177  | -3.514912 | -2.073862 |
| 6 | -6.542549  | 3.119538  | 2.833375  |
| 6 | -6.674759  | 2.020358  | 3.752924  |
| 6 | -6.832264  | -1.310343 | -3.862493 |
| 6 | -6.977537  | 0.099890  | -4.114560 |
| 6 | -6.942545  | -0.769971 | 4.221348  |
| 6 | -7.083964  | -2.122774 | 3.715085  |
| 6 | -7.241098  | 2.746442  | -3.117294 |
| 6 | -7.364834  | 3.657088  | -1.992580 |
| 6 | -7.390114  | -3.904126 | 1.523067  |
| 6 | -7.549719  | -4.141741 | 0.098801  |
| 6 | -7.606785  | 4.102229  | 0.800333  |
| 6 | -7.718572  | 3.609429  | 2.160555  |
| 6 | -7.857430  | -3.167218 | -2.548532 |
| 6 | -7.995957  | -2.073309 | -3.491529 |
| 6 | -7.989843  | 1.496728  | 4.072555  |
| 6 | -8.109450  | 0.050272  | 4.378337  |
| 6 | -8.295562  | 0.705369  | -4.101979 |
| 6 | -8.414433  | 2.106449  | -3.639234 |
| 6 | -8.391244  | -2.648855 | 3.429948  |
| 6 | -8.544219  | -3.601485 | 2.323757  |
| 6 | -8.665643  | 3.945926  | -1.445332 |
| 6 | -8.788244  | 4.206825  | -0.012253 |
| 6 | -8.866231  | -4.121476 | -0.486316 |
| 6 | -9.022504  | -3.655764 | -1.859432 |
| 6 | -9.018838  | 3.279038  | 2.697292  |
| 6 | -9.125079  | 2.267304  | 3.689442  |
| 6 | -9.306423  | -1.528075 | -3.767646 |
| 6 | -9.428415  | -0.161658 | -4.129003 |
| 6 | -9.383090  | -0.628701 | 4.431139  |
| 6 | -9.518363  | -1.935905 | 3.990057  |
| 6 | -9.688877  | 2.709833  | -3.314657 |
| 6 | -9.809724  | 3.607602  | -2.268669 |
| 6 | -9.838211  | -3.956928 | 1.773329  |
| 6 | -9.991652  | -4.222479 | 0.426722  |
| 6 | -10.075130 | 4.206599  | 0.675220  |
| 6 | -10.187697 | 3.780087  | 1.978500  |
| 6 | -10.325326 | -3.329318 | -2.433444 |
| 6 | -10.463433 | -2.324862 | -3.361773 |
| 1 | 11.460909  | -2.020928 | 3.708457  |
| 1 | 11.219427  | -3.831934 | 2.042575  |
| 1 | 11.176435  | 3.686325  | -2.448785 |
| 1 | 10.981059  | 4.457351  | -0.108445 |
| 1 | 10.999774  | -4.377882 | -0.021624 |
| 1 | 10.727201  | -3.905241 | -2.415054 |
| 1 | 10.808034  | 3.955558  | 1.973969  |
| 1 | 10.594852  | 2.362997  | 3.828270  |
| 1 | 10.520912  | -2.378653 | -3.930685 |
| 1 | 10.282657  | -0.065552 | -4.711334 |
| 1 | 10.437696  | 0.264884  | 4.191983  |
| 1 | 10.130779  | 1.933018  | -3.974964 |
| 1 | -10.130774 | 1.933115  | 3.974944  |
| 1 | -10.437696 | 0.264797  | -4.191988 |
| 1 | -10.282655 | -0.065458 | 4.711347  |
| 1 | -10.520911 | -2.378574 | 3.930741  |
| 1 | -10.594854 | 2.362916  | -3.828314 |
| 1 | -10.808035 | 3.955519  | -1.974049 |
| 1 | -10.727202 | -3.905186 | 2.415133  |
| 1 | -10.999774 | -4.377877 | 0.021712  |
| 1 | -10.981060 | 4.457354  | 0.108359  |

|   |            |           |           |
|---|------------|-----------|-----------|
| 1 | -11.176432 | 3.686384  | 2.448716  |
| 1 | -11.219427 | -3.831979 | -2.042498 |
| 1 | -11.460910 | -2.021007 | -3.708418 |

Nanotube (7,5) u08v06  
B3LYP/STO-3G Energy: -7694.091499

|   |           |           |           |
|---|-----------|-----------|-----------|
| 6 | 10.530539 | 1.328741  | -3.939967 |
| 6 | 10.409456 | 2.537593  | -3.297289 |
| 6 | 10.305325 | -3.195468 | 2.788188  |
| 6 | 10.173810 | -3.940437 | 1.639362  |
| 6 | 10.118185 | 4.135446  | -0.756612 |
| 6 | 9.981379  | 4.225763  | 0.614297  |
| 6 | 9.869543  | -4.117755 | -1.356400 |
| 6 | 9.737031  | -3.518939 | -2.596173 |
| 6 | 9.681994  | 2.846606  | 3.280649  |
| 6 | 9.547447  | 1.697909  | 4.043846  |
| 6 | 9.475986  | -0.950642 | -4.115936 |
| 6 | 9.364560  | 0.462886  | -4.114120 |
| 6 | 9.270097  | -1.289421 | 4.068798  |
| 6 | 9.147488  | -2.519417 | 3.369539  |
| 6 | 9.115732  | 3.009594  | -2.809461 |
| 6 | 8.979986  | 3.811991  | -1.600308 |
| 6 | 8.877204  | -4.108815 | 0.990778  |
| 6 | 8.735617  | -4.224257 | -0.458571 |
| 6 | 8.692752  | 4.033494  | 1.252852  |
| 6 | 8.550151  | 3.399120  | 2.567864  |
| 6 | 8.459772  | -3.009444 | -3.048567 |
| 6 | 8.339558  | -1.773878 | -3.853302 |
| 6 | 8.270244  | 1.036087  | 4.180522  |
| 6 | 8.141713  | -0.438798 | 4.256307  |
| 6 | 8.059933  | 1.070563  | -3.970688 |
| 6 | 7.939037  | 2.370088  | -3.337384 |
| 6 | 7.838721  | -2.968393 | 2.951696  |
| 6 | 7.707051  | -3.792505 | 1.764720  |
| 6 | 7.671242  | 3.992589  | -1.024677 |
| 6 | 7.529375  | 4.129818  | 0.414647  |
| 6 | 7.428045  | -4.077910 | -1.045563 |
| 6 | 7.291528  | -3.486077 | -2.365104 |
| 6 | 7.244499  | 2.973560  | 2.993954  |
| 6 | 7.104401  | 1.796859  | 3.832239  |
| 6 | 7.024052  | -1.182151 | -4.004277 |
| 6 | 6.888149  | 0.246958  | -4.119987 |
| 6 | 6.821242  | -1.018246 | 4.097425  |
| 6 | 6.673569  | -2.315496 | 3.491352  |
| 6 | 6.622192  | 2.838074  | -2.952175 |
| 6 | 6.487676  | 3.688386  | -1.808210 |
| 6 | 6.385438  | -4.000142 | 1.203516  |
| 6 | 6.244810  | -4.181132 | -0.209369 |
| 6 | 6.204261  | 4.033091  | 1.005001  |
| 6 | 6.061550  | 3.486844  | 2.319784  |
| 6 | 5.965535  | -3.093231 | -2.826702 |
| 6 | 5.833674  | -1.960323 | -3.693615 |
| 6 | 5.775265  | 1.232662  | 4.038492  |
| 6 | 5.635858  | -0.181603 | 4.223091  |
| 6 | 5.569380  | 0.858020  | -4.034453 |
| 6 | 5.440223  | 2.181002  | -3.486343 |
| 6 | 5.349433  | -2.796991 | 3.123000  |
| 6 | 5.209352  | -3.679469 | 1.994787  |
| 6 | 5.167604  | 3.939661  | -1.256275 |
| 6 | 5.027308  | 4.155064  | 0.163083  |
| 6 | 4.924675  | -4.116371 | -0.810025 |
| 6 | 4.787628  | -3.601747 | -2.153760 |
| 6 | 4.742448  | 3.136724  | 2.810084  |
| 6 | 4.601934  | 2.016967  | 3.717339  |
| 6 | 4.521149  | -1.395322 | -3.936463 |
| 6 | 4.390913  | 0.031031  | -4.155483 |
| 6 | 4.320356  | -0.783837 | 4.159519  |

|   |           |           |           |
|---|-----------|-----------|-----------|
| 6 | 4.178843  | -2.130984 | 3.641548  |
| 6 | 4.130068  | 2.685676  | -3.141193 |
| 6 | 3.996051  | 3.608577  | -2.031679 |
| 6 | 3.896128  | -3.937626 | 1.450266  |
| 6 | 3.755901  | -4.194596 | 0.030476  |
| 6 | 3.716604  | 4.109764  | 0.763319  |
| 6 | 3.575287  | 3.626763  | 2.122261  |
| 6 | 3.478200  | -3.247384 | -2.646392 |
| 6 | 3.345456  | -2.152082 | -3.581924 |
| 6 | 3.291104  | 1.470875  | 3.969442  |
| 6 | 3.150529  | 0.056413  | 4.233599  |
| 6 | 3.083958  | 0.642848  | -4.099626 |
| 6 | 2.954014  | 1.999806  | -3.624794 |
| 6 | 2.866590  | -2.625384 | 3.295020  |
| 6 | 2.725164  | -3.568358 | 2.212795  |
| 6 | 2.682627  | 3.875694  | -1.486610 |
| 6 | 2.542887  | 4.166281  | -0.082994 |
| 6 | 2.439582  | -4.144914 | -0.571701 |
| 6 | 2.300521  | -3.704186 | -1.934511 |
| 6 | 2.256993  | 3.288489  | 2.621514  |
| 6 | 2.115027  | 2.229398  | 3.583895  |
| 6 | 2.030854  | -1.597046 | -3.844457 |
| 6 | 1.900388  | -0.197183 | -4.149192 |
| 6 | 1.830795  | -0.547577 | 4.192279  |
| 6 | 1.689202  | -1.912862 | 3.761424  |
| 6 | 1.637936  | 2.516953  | -3.294720 |
| 6 | 1.503124  | 3.493254  | -2.244591 |
| 6 | 1.404250  | -3.845495 | 1.675521  |
| 6 | 1.262405  | -4.175354 | 0.279660  |
| 6 | 1.222861  | 4.147756  | 0.522184  |
| 6 | 1.080819  | 3.743819  | 1.900545  |
| 6 | 0.983164  | -3.376364 | -2.448118 |
| 6 | 0.849415  | -2.339643 | -3.445564 |
| 6 | 0.796376  | 1.698100  | 3.872280  |
| 6 | 0.655594  | 0.301731  | 4.223641  |
| 6 | 0.588396  | 0.418082  | -4.135791 |
| 6 | 0.458792  | 1.805861  | -3.744902 |
| 6 | 0.373051  | -2.431545 | 3.451322  |
| 6 | 0.232017  | -3.441638 | 2.421874  |
| 6 | 0.190065  | 3.798621  | -1.719041 |
| 6 | 0.051474  | 4.167684  | -0.324468 |
| 6 | -0.051474 | -4.167709 | -0.324163 |
| 6 | -0.190065 | -3.798750 | -1.718763 |
| 6 | -0.232017 | 3.441821  | 2.421624  |
| 6 | -0.373051 | 2.431804  | 3.451146  |
| 6 | -0.458792 | -1.806140 | -3.744772 |
| 6 | -0.588396 | -0.418389 | -4.135761 |
| 6 | -0.655595 | -0.301416 | 4.223663  |
| 6 | -0.796376 | -1.697811 | 3.872403  |
| 6 | -0.849415 | 2.339386  | -3.445733 |
| 6 | -0.983164 | 3.376181  | -2.448364 |
| 6 | -1.080818 | -3.743675 | 1.900818  |
| 6 | -1.222861 | -4.147716 | 0.522488  |
| 6 | -1.262405 | 4.175376  | 0.279354  |
| 6 | -1.404250 | 3.845622  | 1.675241  |
| 6 | -1.503124 | -3.493422 | -2.244337 |
| 6 | -1.637935 | -2.517199 | -3.294538 |
| 6 | -1.689203 | 1.913143  | 3.761285  |
| 6 | -1.830796 | 0.547890  | 4.192240  |
| 6 | -1.900388 | 0.196875  | -4.149206 |
| 6 | -2.030854 | 1.596760  | -3.844572 |
| 6 | -2.115027 | -2.229130 | 3.584056  |
| 6 | -2.256993 | -3.288292 | 2.621754  |
| 6 | -2.300521 | 3.704040  | -1.934781 |
| 6 | -2.439582 | 4.144871  | -0.572005 |
| 6 | -2.542887 | -4.166288 | -0.082689 |
| 6 | -2.682627 | -3.875806 | -1.486326 |
| 6 | -2.725165 | 3.568526  | 2.212535  |
| 6 | -2.866591 | 2.625631  | 3.294829  |
| 6 | -2.954014 | -2.000076 | -3.624649 |

|   |            |           |           |
|---|------------|-----------|-----------|
| 6 | -3.083958  | -0.643152 | -4.099580 |
| 6 | -3.150530  | -0.056098 | 4.233603  |
| 6 | -3.291104  | -1.470579 | 3.969549  |
| 6 | -3.345456  | 2.151815  | -3.582079 |
| 6 | -3.478200  | 3.247186  | -2.646628 |
| 6 | -3.575286  | -3.626604 | 2.122526  |
| 6 | -3.716604  | -4.109707 | 0.763620  |
| 6 | -3.755901  | 4.194599  | 0.030168  |
| 6 | -3.896129  | 3.937735  | 1.449977  |
| 6 | -3.996051  | -3.608729 | -2.031415 |
| 6 | -4.130068  | -2.685911 | -3.140997 |
| 6 | -4.178844  | 2.131255  | 3.641392  |
| 6 | -4.320357  | 0.784146  | 4.159461  |
| 6 | -4.390912  | -0.031339 | -4.155481 |
| 6 | -4.521149  | 1.395029  | -3.936564 |
| 6 | -4.601934  | -2.016690 | 3.717485  |
| 6 | -4.742447  | -3.136514 | 2.810313  |
| 6 | -4.787628  | 3.601586  | -2.154024 |
| 6 | -4.924675  | 4.116311  | -0.810328 |
| 6 | -5.027307  | -4.155052 | 0.163388  |
| 6 | -5.167604  | -3.939755 | -1.255986 |
| 6 | -5.209353  | 3.679619  | 1.994517  |
| 6 | -5.349434  | 2.797225  | 3.122796  |
| 6 | -5.440223  | -2.181261 | -3.486184 |
| 6 | -5.569380  | -0.858319 | -4.034391 |
| 6 | -5.635858  | 0.181916  | 4.223077  |
| 6 | -5.775265  | -1.232363 | 4.038581  |
| 6 | -5.833673  | 1.960048  | -3.693758 |
| 6 | -5.965534  | 3.093020  | -2.826929 |
| 6 | -6.061549  | -3.486673 | 2.320040  |
| 6 | -6.204260  | -4.033017 | 1.005297  |
| 6 | -6.244810  | 4.181117  | -0.209677 |
| 6 | -6.385439  | 4.000233  | 1.203221  |
| 6 | -6.487676  | -3.688520 | -1.807939 |
| 6 | -6.622192  | -2.838293 | -2.951966 |
| 6 | -6.673570  | 2.315756  | 3.491181  |
| 6 | -6.821243  | 1.018549  | 4.097349  |
| 6 | -6.888149  | -0.247263 | -4.119970 |
| 6 | -7.024051  | 1.181854  | -4.004363 |
| 6 | -7.104401  | -1.796576 | 3.832371  |
| 6 | -7.244497  | -2.973340 | 2.994173  |
| 6 | -7.291528  | 3.485900  | -2.365360 |
| 6 | -7.428045  | 4.077832  | -1.045863 |
| 6 | -7.529375  | -4.129787 | 0.414951  |
| 6 | -7.671242  | -3.992664 | -1.024383 |
| 6 | -7.707051  | 3.792638  | 1.764440  |
| 6 | -7.838722  | 2.968613  | 2.951477  |
| 6 | -7.939038  | -2.370335 | -3.337210 |
| 6 | -8.059933  | -1.070857 | -3.970611 |
| 6 | -8.141715  | 0.439112  | 4.256274  |
| 6 | -8.270244  | -1.035780 | 4.180599  |
| 6 | -8.339557  | 1.773591  | -3.853432 |
| 6 | -8.459771  | 3.009216  | -3.048788 |
| 6 | -8.550150  | -3.398934 | 2.568116  |
| 6 | -8.692751  | -4.033403 | 1.253150  |
| 6 | -8.735617  | 4.224224  | -0.458883 |
| 6 | -8.877205  | 4.108891  | 0.990474  |
| 6 | -8.979987  | -3.812108 | -1.600026 |
| 6 | -9.115733  | -3.009802 | -2.809240 |
| 6 | -9.147489  | 2.519668  | 3.369352  |
| 6 | -9.270097  | 1.289724  | 4.068703  |
| 6 | -9.364560  | -0.463191 | -4.114088 |
| 6 | -9.475986  | 0.950337  | -4.116007 |
| 6 | -9.547447  | -1.697616 | 4.043976  |
| 6 | -9.681993  | -2.846369 | 3.280863  |
| 6 | -9.737031  | 3.518741  | -2.596430 |
| 6 | -9.869543  | 4.117654  | -1.356704 |
| 6 | -9.981378  | -4.225718 | 0.614609  |
| 6 | -10.118185 | -4.135499 | -0.756306 |
| 6 | -10.173810 | 3.940560  | 1.639070  |



|   |            |           |           |
|---|------------|-----------|-----------|
| 6 | -10.305325 | 3.195678  | 2.787952  |
| 6 | -10.409456 | -2.537838 | -3.297104 |
| 6 | -10.530539 | -1.329034 | -3.939873 |
| 1 | 11.521753  | 0.939098  | -4.210500 |
| 1 | 11.310736  | 3.117204  | -3.059253 |
| 1 | 11.300552  | -2.990936 | 3.206789  |
| 1 | 11.070974  | -4.334229 | 1.144446  |
| 1 | 11.121425  | 4.174473  | -1.199904 |
| 1 | 10.878316  | 4.334496  | 1.237661  |
| 1 | 10.870396  | -4.386685 | -0.995211 |
| 1 | 10.636456  | -3.323705 | -3.194451 |
| 1 | 10.685041  | 3.253710  | 3.099529  |
| 1 | 10.447960  | 1.220045  | 4.450942  |
| 1 | 10.482464  | -1.387026 | -4.080806 |
| 1 | 10.280410  | -0.899523 | 4.247660  |
| 1 | -10.280410 | 0.899841  | 4.247596  |
| 1 | -10.482464 | 1.386724  | -4.080910 |
| 1 | -10.447960 | -1.219725 | 4.451040  |
| 1 | -10.685039 | -3.253488 | 3.099774  |
| 1 | -10.636457 | 3.323457  | -3.194692 |
| 1 | -10.870396 | 4.386613  | -0.995537 |
| 1 | -10.878316 | -4.334407 | 1.237981  |
| 1 | -11.121427 | -4.174557 | -1.199595 |
| 1 | -11.070975 | 4.334316  | 1.144124  |
| 1 | -11.300552 | 2.991180  | 3.206570  |
| 1 | -11.310736 | -3.117431 | -3.059026 |
| 1 | -11.521753 | -0.939411 | -4.210437 |

Nanotube (7,5) u08v07  
B3LYP/STO-3G Energy: -7769.386422

|   |           |           |           |
|---|-----------|-----------|-----------|
| 6 | 10.686151 | -0.303926 | 4.051374  |
| 6 | 10.556488 | -1.636234 | 3.740992  |
| 6 | 10.372971 | 2.346086  | -3.613682 |
| 6 | 10.257820 | 3.360111  | -2.691793 |
| 6 | 10.232302 | -3.828797 | 1.695879  |
| 6 | 10.077520 | -4.265956 | 0.395837  |
| 6 | 9.994510  | 4.298417  | 0.163544  |
| 6 | 9.877967  | 4.038058  | 1.516604  |
| 6 | 9.741907  | -3.615888 | -2.531484 |
| 6 | 9.596644  | -2.701682 | -3.561956 |
| 6 | 9.634923  | 1.947877  | 3.648603  |
| 6 | 9.522643  | 0.582384  | 4.010782  |
| 6 | 9.319246  | 0.179702  | -4.349071 |
| 6 | 9.206750  | 1.547483  | -3.986604 |
| 6 | 9.256236  | -2.212524 | 3.404961  |
| 6 | 9.104870  | -3.296167 | 2.443488  |
| 6 | 8.970167  | 3.693472  | -2.090014 |
| 6 | 8.848376  | 4.176194  | -0.717501 |
| 6 | 8.780037  | -4.239290 | -0.254406 |
| 6 | 8.619575  | -3.962999 | -1.685261 |
| 6 | 8.605891  | 3.667102  | 2.100921  |
| 6 | 8.495080  | 2.680698  | 3.196841  |
| 6 | 8.317041  | -2.092415 | -3.846914 |
| 6 | 8.187520  | -0.686733 | -4.296769 |
| 6 | 8.215664  | -0.037071 | 4.043996  |
| 6 | 8.086206  | -1.454867 | 3.766627  |
| 6 | 7.903775  | 2.093769  | -3.680330 |
| 6 | 7.789022  | 3.194781  | -2.742496 |
| 6 | 7.788484  | -3.614383 | 1.950186  |
| 6 | 7.627744  | -4.115112 | 0.595841  |
| 6 | 7.548515  | 4.191623  | -0.095834 |
| 6 | 7.429001  | 3.958350  | 1.333050  |
| 6 | 7.307998  | -3.657462 | -2.189612 |
| 6 | 7.156079  | -2.734681 | -3.300019 |
| 6 | 7.181468  | 2.152816  | 3.511217  |
| 6 | 7.046274  | 0.801520  | 3.991444  |
| 6 | 6.869702  | -0.080904 | -4.274346 |

|   |           |           |           |
|---|-----------|-----------|-----------|
| 6 | 6.731015  | 1.329172  | -4.019257 |
| 6 | 6.764765  | -2.001240 | 3.530706  |
| 6 | 6.615547  | -3.115980 | 2.644653  |
| 6 | 6.475705  | 3.545030  | -2.236372 |
| 6 | 6.354502  | 4.082617  | -0.915306 |
| 6 | 6.295320  | -4.168884 | 0.017610  |
| 6 | 6.134761  | -3.976911 | -1.391072 |
| 6 | 6.109250  | 3.702261  | 1.896541  |
| 6 | 5.987678  | 2.829627  | 3.025766  |
| 6 | 5.824467  | -2.237088 | -3.625721 |
| 6 | 5.682483  | -0.917202 | -4.164371 |
| 6 | 5.726287  | 0.193727  | 4.080780  |
| 6 | 5.589626  | -1.224406 | 3.892263  |
| 6 | 5.412454  | 1.894049  | -3.768659 |
| 6 | 5.288574  | 3.036664  | -2.903564 |
| 6 | 5.288248  | -3.495833 | 2.192107  |
| 6 | 5.129457  | -4.067214 | 0.878255  |
| 6 | 5.042410  | 4.179552  | -0.301186 |
| 6 | 4.922565  | 4.026651  | 1.130240  |
| 6 | 4.808624  | -3.759323 | -1.937367 |
| 6 | 4.655127  | -2.908874 | -3.097957 |
| 6 | 4.677530  | 2.350422  | 3.421140  |
| 6 | 4.549051  | 1.028894  | 3.999511  |
| 6 | 4.367503  | -0.313593 | -4.239006 |
| 6 | 4.233762  | 1.121245  | -4.082878 |
| 6 | 4.274533  | -1.796335 | 3.704626  |
| 6 | 4.126326  | -2.973060 | 2.872015  |
| 6 | 3.982806  | 3.432177  | -2.426870 |
| 6 | 3.862189  | 4.045688  | -1.119373 |
| 6 | 3.810616  | -4.174391 | 0.303522  |
| 6 | 3.650820  | -4.054819 | -1.131788 |
| 6 | 3.619311  | 3.816213  | 1.713851  |
| 6 | 3.497680  | 2.996502  | 2.899683  |
| 6 | 3.340572  | -2.440942 | -3.463923 |
| 6 | 3.196227  | -1.140368 | -4.079323 |
| 6 | 3.241273  | 0.428144  | 4.118382  |
| 6 | 3.104901  | -1.005169 | 4.009899  |
| 6 | 2.926799  | 1.693613  | -3.858137 |
| 6 | 2.801281  | 2.884706  | -3.053798 |
| 6 | 2.806572  | -3.367763 | 2.431213  |
| 6 | 2.648804  | -4.009337 | 1.151218  |
| 6 | 2.554600  | 4.158811  | -0.508079 |
| 6 | 2.433192  | 4.081629  | 0.923936  |
| 6 | 2.326406  | -3.851448 | -1.683411 |
| 6 | 2.170470  | -3.071628 | -2.881638 |
| 6 | 2.186492  | 2.531715  | 3.310747  |
| 6 | 2.058782  | 1.256846  | 3.964213  |
| 6 | 1.877631  | -0.540916 | -4.174951 |
| 6 | 1.742674  | 0.889590  | -4.108027 |
| 6 | 1.784713  | -1.585032 | 3.839336  |
| 6 | 1.636659  | -2.798373 | 3.079248  |
| 6 | 1.488587  | 3.296853  | -2.588888 |
| 6 | 1.366208  | 3.975369  | -1.324019 |
| 6 | 1.321035  | -4.143095 | 0.578531  |
| 6 | 1.160342  | -4.104552 | -0.854054 |
| 6 | 1.122334  | 3.900945  | 1.520480  |
| 6 | 1.000106  | 3.152979  | 2.749415  |
| 6 | 0.847296  | -2.625720 | -3.276714 |
| 6 | 0.701252  | -1.365486 | -3.969424 |
| 6 | 0.745647  | 0.663324  | 4.123698  |
| 6 | 0.610489  | -0.777222 | 4.104726  |
| 6 | 0.430812  | 1.476264  | -3.923548 |
| 6 | 0.305023  | 2.718557  | -3.190440 |
| 6 | 0.316538  | -3.225859 | 2.667297  |
| 6 | 0.160191  | -3.942849 | 1.417965  |
| 6 | 0.060270  | 4.130195  | -0.721835 |
| 6 | -0.060270 | 4.130204  | 0.721778  |
| 6 | -0.160191 | -3.942866 | -1.417912 |
| 6 | -0.316538 | -3.225893 | -2.667253 |
| 6 | -0.305023 | 2.718598  | 3.190402  |

|   |           |           |           |
|---|-----------|-----------|-----------|
| 6 | -0.430812 | 1.476315  | 3.923527  |
| 6 | -0.610490 | -0.777276 | -4.104716 |
| 6 | -0.745648 | 0.663270  | -4.123708 |
| 6 | -0.701253 | -1.365435 | 3.969443  |
| 6 | -0.847296 | -2.625679 | 3.276750  |
| 6 | -1.000107 | 3.152944  | -2.749459 |
| 6 | -1.122334 | 3.900926  | -1.520534 |
| 6 | -1.160342 | -4.104543 | 0.854109  |
| 6 | -1.321034 | -4.143103 | -0.578476 |
| 6 | -1.366208 | 3.975386  | 1.323964  |
| 6 | -1.488587 | 3.296886  | 2.588842  |
| 6 | -1.636659 | -2.798414 | -3.079210 |
| 6 | -1.784713 | -1.585082 | -3.839315 |
| 6 | -1.742674 | 0.889643  | 4.108014  |
| 6 | -1.877632 | -0.540861 | 4.174957  |
| 6 | -2.058782 | 1.256794  | -3.964230 |
| 6 | -2.186493 | 2.531672  | -3.310782 |
| 6 | -2.170470 | -3.071591 | 2.881680  |
| 6 | -2.326405 | -3.851426 | 1.683463  |
| 6 | -2.433191 | 4.081618  | -0.923992 |
| 6 | -2.554599 | 4.158819  | 0.508022  |
| 6 | -2.648803 | -4.009352 | -1.151164 |
| 6 | -2.806572 | -3.367795 | -2.431167 |
| 6 | -2.801281 | 2.884745  | 3.053757  |
| 6 | -2.926799 | 1.693664  | 3.858112  |
| 6 | -3.104901 | -1.005221 | -4.009884 |
| 6 | -3.241273 | 0.428090  | -4.118387 |
| 6 | -3.196227 | -1.140315 | 4.079337  |
| 6 | -3.340573 | -2.440897 | 3.463956  |
| 6 | -3.497681 | 2.996464  | -2.899724 |
| 6 | -3.619311 | 3.816191  | -1.713904 |
| 6 | -3.650820 | -4.054805 | 1.131842  |
| 6 | -3.810616 | -4.174396 | -0.303466 |
| 6 | -3.862189 | 4.045703  | 1.119318  |
| 6 | -3.982806 | 3.432210  | 2.426823  |
| 6 | -4.126326 | -2.973098 | -2.871975 |
| 6 | -4.274534 | -1.796384 | -3.704601 |
| 6 | -4.233762 | 1.121298  | 4.082861  |
| 6 | -4.367503 | -0.313537 | 4.239008  |
| 6 | -4.549052 | 1.028841  | -3.999524 |
| 6 | -4.677532 | 2.350377  | -3.421171 |
| 6 | -4.655128 | -2.908834 | 3.097996  |
| 6 | -4.808624 | -3.759300 | 1.937417  |
| 6 | -4.922565 | 4.026637  | -1.130294 |
| 6 | -5.042410 | 4.179559  | 0.301130  |
| 6 | -5.129456 | -4.067228 | -0.878201 |
| 6 | -5.288247 | -3.495863 | -2.192061 |
| 6 | -5.288573 | 3.036704  | 2.903523  |
| 6 | -5.412454 | 1.894099  | 3.768632  |
| 6 | -5.589627 | -1.224458 | -3.892246 |
| 6 | -5.726288 | 0.193673  | -4.080781 |
| 6 | -5.682484 | -0.917147 | 4.164380  |
| 6 | -5.824468 | -2.237040 | 3.625749  |
| 6 | -5.987679 | 2.829588  | -3.025803 |
| 6 | -6.109251 | 3.702237  | -1.896590 |
| 6 | -6.134760 | -3.976895 | 1.391125  |
| 6 | -6.295319 | -4.168887 | -0.017555 |
| 6 | -6.354501 | 4.082632  | 0.915252  |
| 6 | -6.475703 | 3.545062  | 2.236325  |
| 6 | -6.615546 | -3.116017 | -2.644611 |
| 6 | -6.764765 | -2.001288 | -3.530677 |
| 6 | -6.731015 | 1.329226  | 4.019237  |
| 6 | -6.869702 | -0.080846 | 4.274344  |
| 6 | -7.046275 | 0.801467  | -3.991452 |
| 6 | -7.181469 | 2.152769  | -3.511243 |
| 6 | -7.156080 | -2.734636 | 3.300053  |
| 6 | -7.307998 | -3.657434 | 2.189659  |
| 6 | -7.429002 | 3.958332  | -1.333101 |
| 6 | -7.548514 | 4.191626  | 0.095779  |
| 6 | -7.627743 | -4.115124 | -0.595787 |

|   |            |           |           |
|---|------------|-----------|-----------|
| 6 | -7.788483  | -3.614412 | -1.950138 |
| 6 | -7.789021  | 3.194821  | 2.742454  |
| 6 | -7.903774  | 2.093820  | 3.680302  |
| 6 | -8.086207  | -1.454919 | -3.766604 |
| 6 | -8.215666  | -0.037125 | -4.043992 |
| 6 | -8.187521  | -0.686675 | 4.296775  |
| 6 | -8.317043  | -2.092362 | 3.846938  |
| 6 | -8.495081  | 2.680655  | -3.196875 |
| 6 | -8.605892  | 3.667074  | -2.100968 |
| 6 | -8.619575  | -3.962980 | 1.685314  |
| 6 | -8.780036  | -4.239293 | 0.254461  |
| 6 | -8.848376  | 4.176207  | 0.717448  |
| 6 | -8.970166  | 3.693505  | 2.089969  |
| 6 | -9.104869  | -3.296205 | -2.443445 |
| 6 | -9.256236  | -2.212572 | -3.404931 |
| 6 | -9.206749  | 1.547541  | 3.986584  |
| 6 | -9.319246  | 0.179763  | 4.349067  |
| 6 | -9.522644  | 0.582329  | -4.010787 |
| 6 | -9.634923  | 1.947828  | -3.648628 |
| 6 | -9.596645  | -2.701634 | 3.561989  |
| 6 | -9.741907  | -3.615856 | 2.531530  |
| 6 | -9.877967  | 4.038041  | -1.516656 |
| 6 | -9.994510  | 4.298419  | -0.163599 |
| 6 | -10.077518 | -4.265971 | -0.395781 |
| 6 | -10.232300 | -3.828828 | -1.695830 |
| 6 | -10.257818 | 3.360154  | 2.691754  |
| 6 | -10.372969 | 2.346141  | 3.613655  |
| 6 | -10.556489 | -1.636286 | -3.740965 |
| 6 | -10.686152 | -0.303981 | -4.051364 |
| 1 | 11.680697  | 0.138318  | 4.202489  |
| 1 | 11.454225  | -2.261272 | 3.649576  |
| 1 | 11.361999  | 2.038163  | -3.980470 |
| 1 | 11.161770  | 3.864672  | -2.326734 |
| 1 | 11.241124  | -3.757236 | 2.122169  |
| 1 | 10.965952  | -4.534293 | -0.190362 |
| 1 | 10.990601  | 4.462020  | -0.267341 |
| 1 | 10.784907  | 3.999511  | 2.133858  |
| 1 | 10.747265  | -3.967080 | -2.265597 |
| 1 | 10.491063  | -2.348081 | -4.091112 |
| 1 | 10.641006  | 2.357355  | 3.491058  |
| 1 | 10.326703  | -0.247022 | -4.436585 |
| 1 | -10.326703 | -0.246959 | 4.436589  |
| 1 | -10.641007 | 2.357308  | -3.491087 |
| 1 | -10.491065 | -2.348026 | 4.091138  |
| 1 | -10.747266 | -3.967051 | 2.265647  |
| 1 | -10.784907 | 3.999485  | -2.133908 |
| 1 | -10.990600 | 4.462030  | 0.267283  |
| 1 | -10.965950 | -4.534300 | 0.190421  |
| 1 | -11.241122 | -3.757274 | -2.122120 |
| 1 | -11.161768 | 3.864712  | 2.326690  |
| 1 | -11.361998 | 2.038225  | 3.980448  |
| 1 | -11.454225 | -2.261321 | -3.649538 |
| 1 | -11.680697 | 0.138261  | -4.202481 |

Nanotube (7,5) u08v08  
B3LYP/STO-3G Energy: -7844.681174

|   |           |           |           |
|---|-----------|-----------|-----------|
| 6 | 10.735256 | -4.102481 | 0.743472  |
| 6 | 10.605146 | -4.141533 | -0.623664 |
| 6 | 10.530182 | 3.993781  | 1.346178  |
| 6 | 10.406662 | 3.363032  | 2.561679  |
| 6 | 10.301637 | -2.719499 | -3.265439 |
| 6 | 10.163068 | -1.572233 | -4.019767 |
| 6 | 10.110640 | 0.844489  | 4.196761  |
| 6 | 9.975926  | -0.528124 | 4.290559  |
| 6 | 9.868138  | 1.428575  | -4.139003 |
| 6 | 9.738724  | 2.660107  | -3.519151 |
| 6 | 9.697599  | -3.120736 | 2.816142  |

|   |          |           |           |
|---|----------|-----------|-----------|
| 6 | 9.575412 | -3.818956 | 1.589774  |
| 6 | 9.479397 | 4.162498  | -0.936376 |
| 6 | 9.366127 | 4.164047  | 0.477769  |
| 6 | 9.307422 | -3.945097 | -1.266986 |
| 6 | 9.165610 | -3.290710 | -2.559637 |
| 6 | 9.112364 | 2.882050  | 3.037006  |
| 6 | 8.975005 | 1.680617  | 3.853483  |
| 6 | 8.874172 | -0.918824 | -4.160605 |
| 6 | 8.733527 | 0.536410  | -4.259066 |
| 6 | 8.694642 | -1.171075 | 4.081674  |
| 6 | 8.565868 | -2.480594 | 3.409206  |
| 6 | 8.464063 | 3.108710  | -3.004148 |
| 6 | 8.343936 | 3.904878  | -1.761409 |
| 6 | 8.265545 | -3.991858 | 0.999305  |
| 6 | 8.134825 | -4.084886 | -0.441988 |
| 6 | 8.060669 | 4.024737  | 1.083936  |
| 6 | 7.937539 | 3.401347  | 2.388043  |
| 6 | 7.854755 | -2.877301 | -2.994276 |
| 6 | 7.710788 | -1.693947 | -3.824711 |
| 6 | 7.667212 | 1.100913  | 4.028316  |
| 6 | 7.528678 | -0.338526 | 4.168284  |
| 6 | 7.429394 | 1.119947  | -4.094624 |
| 6 | 7.294339 | 2.431526  | -3.486725 |
| 6 | 7.246486 | -2.902419 | 2.980100  |
| 6 | 7.099917 | -3.710661 | 1.796491  |
| 6 | 7.027904 | 4.055917  | -1.170786 |
| 6 | 6.890028 | 4.171879  | 0.257816  |
| 6 | 6.815035 | -3.978310 | -1.030765 |
| 6 | 6.674272 | -3.404957 | -2.335385 |
| 6 | 6.619487 | 3.018832  | 2.855934  |
| 6 | 6.483625 | 1.880939  | 3.713718  |
| 6 | 6.386425 | -1.130785 | -4.025723 |
| 6 | 6.245197 | 0.282198  | -4.200502 |
| 6 | 6.201375 | -0.931127 | 4.065305  |
| 6 | 6.061848 | -2.243834 | 3.510290  |
| 6 | 5.968773 | 2.891135  | -3.089692 |
| 6 | 5.837048 | 3.750546  | -1.951552 |
| 6 | 5.776850 | -3.933607 | 1.231419  |
| 6 | 5.637617 | -4.111848 | -0.187344 |
| 6 | 5.570145 | 4.090188  | 0.867458  |
| 6 | 5.438872 | 3.548439  | 2.192780  |
| 6 | 5.352005 | -3.045976 | -2.818691 |
| 6 | 5.209315 | -1.920958 | -3.707473 |
| 6 | 5.164040 | 1.329155  | 3.964628  |
| 6 | 5.025480 | -0.091038 | 4.183230  |
| 6 | 4.926828 | 0.883880  | -4.130896 |
| 6 | 4.790501 | 2.224328  | -3.605538 |
| 6 | 4.744538 | -2.730814 | 3.147956  |
| 6 | 4.603233 | -3.624859 | 2.018411  |
| 6 | 4.524313 | 3.993622  | -1.387399 |
| 6 | 4.392407 | 4.210989  | 0.039006  |
| 6 | 4.322689 | -4.057900 | -0.788596 |
| 6 | 4.182024 | -3.553041 | -2.139061 |
| 6 | 4.128033 | 3.206035  | 2.697322  |
| 6 | 3.993242 | 2.101839  | 3.626054  |
| 6 | 3.897757 | -1.375092 | -3.960130 |
| 6 | 3.757486 | 0.044736  | -4.212632 |
| 6 | 3.714032 | -0.691965 | 4.130698  |
| 6 | 3.573923 | -2.046201 | 3.641058  |
| 6 | 3.481997 | 2.715445  | -3.248042 |
| 6 | 3.348735 | 3.643803  | -2.147102 |
| 6 | 3.291620 | -3.875104 | 1.467990  |
| 6 | 3.151436 | -4.134143 | 0.054123  |
| 6 | 3.084588 | 4.156849  | 0.649296  |
| 6 | 2.952725 | 3.686357  | 2.007155  |
| 6 | 2.867320 | -3.210305 | -2.634546 |
| 6 | 2.725275 | -2.136186 | -3.584312 |
| 6 | 2.679198 | 1.557505  | 3.893217  |
| 6 | 2.539662 | 0.155144  | 4.186300  |
| 6 | 2.441632 | 0.647888  | -4.159228 |

|   |           |           |           |
|---|-----------|-----------|-----------|
| 6 | 2.303283  | 2.007432  | -3.710827 |
| 6 | 2.256388  | -2.544338 | 3.297060  |
| 6 | 2.114713  | -3.498250 | 2.229991  |
| 6 | 2.033438  | 3.905259  | -1.592273 |
| 6 | 1.901270  | 4.206596  | -0.192403 |
| 6 | 1.831947  | -4.097591 | -0.550071 |
| 6 | 1.690404  | -3.672471 | -1.917663 |
| 6 | 1.635749  | 3.358817  | 2.524220  |
| 6 | 1.500092  | 2.313878  | 3.505302  |
| 6 | 1.405416  | -1.598856 | -3.862129 |
| 6 | 1.264111  | -0.203186 | -4.193067 |
| 6 | 1.220820  | -0.450648 | 4.165274  |
| 6 | 1.079837  | -1.826786 | 3.755996  |
| 6 | 0.986386  | 2.520253  | -3.380987 |
| 6 | 0.851859  | 3.511135  | -2.338600 |
| 6 | 0.796750  | -3.783623 | 1.696071  |
| 6 | 0.656248  | -4.129046 | 0.299181  |
| 6 | 0.588152  | 4.193799  | 0.421410  |
| 6 | 0.456854  | 3.805981  | 1.809699  |
| 6 | 0.374269  | -3.365002 | -2.437421 |
| 6 | 0.233101  | -2.342653 | -3.452935 |
| 6 | 0.186967  | 1.789043  | 3.811413  |
| 6 | 0.048627  | 0.396302  | 4.184422  |
| 6 | -0.048632 | 0.401360  | -4.183933 |
| 6 | -0.186970 | 1.793650  | -3.809249 |
| 6 | -0.233103 | -2.346827 | 3.450121  |
| 6 | -0.374269 | -3.367951 | 2.433374  |
| 6 | -0.456851 | 3.808172  | -1.805102 |
| 6 | -0.588147 | 4.194309  | -0.416344 |
| 6 | -0.656244 | -4.128684 | -0.304151 |
| 6 | -0.796747 | -3.781570 | -1.700622 |
| 6 | -0.851856 | 3.508304  | 2.342838  |
| 6 | -0.986387 | 2.516163  | 3.384026  |
| 6 | -1.079838 | -1.822244 | -3.758181 |
| 6 | -1.220823 | -0.445614 | -4.165801 |
| 6 | -1.264117 | -0.208253 | 4.192824  |
| 6 | -1.405421 | -1.603525 | 3.860206  |
| 6 | -1.500093 | 2.318117  | -3.502503 |
| 6 | -1.635746 | 3.361874  | -2.520162 |
| 6 | -1.690403 | -3.674794 | 1.913242  |
| 6 | -1.831943 | -4.098260 | 0.545137  |
| 6 | -1.901265 | 4.206368  | 0.197485  |
| 6 | -2.033434 | 3.903336  | 1.596988  |
| 6 | -2.114709 | -3.495555 | -2.234199 |
| 6 | -2.256386 | -2.540352 | -3.300112 |
| 6 | -2.303285 | 2.002946  | 3.713244  |
| 6 | -2.441639 | 0.642861  | 4.160004  |
| 6 | -2.539664 | 0.160203  | -4.186093 |
| 6 | -2.679199 | 1.562210  | -3.891323 |
| 6 | -2.725281 | -2.140520 | 3.581738  |
| 6 | -2.867322 | -3.213495 | 2.630679  |
| 6 | -2.952722 | 3.688792  | -2.002701 |
| 6 | -3.084583 | 4.157644  | -0.644275 |
| 6 | -3.151431 | -4.134087 | -0.059104 |
| 6 | -3.291615 | -3.873335 | -1.472657 |
| 6 | -3.348732 | 3.641213  | 2.151501  |
| 6 | -3.481997 | 2.711521  | 3.251313  |
| 6 | -3.573921 | -2.041801 | -3.643508 |
| 6 | -3.714032 | -0.686974 | -4.131509 |
| 6 | -3.757494 | 0.039647  | 4.212672  |
| 6 | -3.897765 | -1.379876 | 3.958460  |
| 6 | -3.993242 | 2.106222  | -3.623500 |
| 6 | -4.128031 | 3.209301  | -2.693443 |
| 6 | -4.182026 | -3.555635 | 2.134775  |
| 6 | -4.322687 | -4.058866 | 0.783702  |
| 6 | -4.392401 | 4.211051  | -0.033920 |
| 6 | -4.524308 | 3.991959  | 1.392222  |
| 6 | -4.603227 | -3.622429 | -2.022780 |
| 6 | -4.744534 | -2.727015 | -3.151240 |
| 6 | -4.790505 | 2.219973  | 3.608209  |

|   |            |           |           |
|---|------------|-----------|-----------|
| 6 | -4.926836  | 0.878890  | 4.131942  |
| 6 | -5.025479  | -0.085986 | -4.183311 |
| 6 | -5.164040  | 1.333943  | -3.962998 |
| 6 | -5.209323  | -1.925436 | 3.705139  |
| 6 | -5.352011  | -3.049386 | 2.815007  |
| 6 | -5.438869  | 3.551099  | -2.188489 |
| 6 | -5.570139  | 4.091255  | -0.862517 |
| 6 | -5.637612  | -4.112092 | 0.182380  |
| 6 | -5.776844  | -3.932137 | -1.236167 |
| 6 | -5.837045  | 3.748205  | 1.956079  |
| 6 | -5.968774  | 2.887411  | 3.093172  |
| 6 | -6.061844  | -2.239598 | -3.512983 |
| 6 | -6.201372  | -0.926218 | -4.066403 |
| 6 | -6.245206  | 0.277127  | 4.200812  |
| 6 | -6.386436  | -1.135644 | 4.024331  |
| 6 | -6.483623  | 1.885424  | -3.711422 |
| 6 | -6.619485  | 3.022287  | -2.852276 |
| 6 | -6.674276  | -3.407786 | 2.331264  |
| 6 | -6.815033  | -3.979574 | 1.025956  |
| 6 | -6.890023  | 4.172216  | -0.252779 |
| 6 | -7.027900  | 4.054529  | 1.175682  |
| 6 | -7.099911  | -3.708511 | -1.800972 |
| 6 | -7.246482  | -2.898829 | -2.983596 |
| 6 | -7.294343  | 2.427322  | 3.489641  |
| 6 | -7.429402  | 1.115005  | 4.095942  |
| 6 | -7.528676  | -0.333492 | -4.168662 |
| 6 | -7.667211  | 1.105776  | -4.026957 |
| 6 | -7.710798  | -1.698562 | 3.822630  |
| 6 | -7.854763  | -2.880919 | 2.990779  |
| 6 | -7.937536  | 3.404244  | -2.383928 |
| 6 | -8.060664  | 4.026072  | -1.079076 |
| 6 | -8.134821  | -4.085447 | 0.437048  |
| 6 | -8.265540  | -3.990679 | -1.004131 |
| 6 | -8.343934  | 3.902773  | 1.766117  |
| 6 | -8.464064  | 3.105095  | 3.007887  |
| 6 | -8.565866  | -2.476480 | -3.412187 |
| 6 | -8.694640  | -1.166144 | -4.083064 |
| 6 | -8.733538  | 0.531271  | 4.259668  |
| 6 | -8.874185  | -0.923842 | 4.159449  |
| 6 | -8.975005  | 1.685268  | -3.851426 |
| 6 | -9.112363  | 2.885725  | -3.033512 |
| 6 | -9.165616  | -3.293809 | 2.555638  |
| 6 | -9.307422  | -3.946654 | 1.262208  |
| 6 | -9.366123  | 4.164658  | -0.472744 |
| 6 | -9.479396  | 4.161392  | 0.941398  |
| 6 | -9.575408  | -3.817062 | -1.594392 |
| 6 | -9.697596  | -3.117347 | -2.819909 |
| 6 | -9.738729  | 2.655867  | 3.522331  |
| 6 | -9.868148  | 1.423581  | 4.140679  |
| 6 | -9.975925  | -0.522946 | -4.291168 |
| 6 | -10.110641 | 0.849553  | -4.195707 |
| 6 | -10.163080 | -1.577078 | 4.017813  |
| 6 | -10.301648 | -2.723438 | 3.262108  |
| 6 | -10.406658 | 3.366151  | -2.557616 |
| 6 | -10.530176 | 3.995450  | -1.341363 |
| 6 | -10.605144 | -4.142330 | 0.618648  |
| 6 | -10.735251 | -4.101634 | -0.748440 |
| 1 | 11.728957  | -4.150438 | 1.209972  |
| 1 | 11.501652  | -4.226614 | -1.251310 |
| 1 | 11.522484  | 4.258231  | 0.955338  |
| 1 | 11.307267  | 3.128232  | 3.143631  |
| 1 | 11.304608  | -3.127791 | -3.087390 |
| 1 | 11.058266  | -1.086320 | -4.428918 |
| 1 | 11.112413  | 1.289908  | 4.245796  |
| 1 | 10.874484  | -1.146935 | 4.411599  |
| 1 | 10.868690  | 1.068595  | -4.410595 |
| 1 | 10.640641  | 3.250711  | -3.312508 |
| 1 | 10.706777  | -2.877689 | 3.171985  |
| 1 | 10.486365  | 4.124852  | -1.371199 |
| 1 | -10.486342 | 4.123242  | 1.376169  |

|   |            |           |           |
|---|------------|-----------|-----------|
| 1 | -10.706730 | -2.873919 | -3.175473 |
| 1 | -10.640643 | 3.246722  | 3.316396  |
| 1 | -10.868702 | 1.063270  | 4.411820  |
| 1 | -10.874481 | -1.141613 | -4.412949 |
| 1 | -11.112416 | 1.295028  | -4.244193 |
| 1 | -11.058282 | -1.091654 | 4.427536  |
| 1 | -11.304624 | -3.131510 | 3.083549  |
| 1 | -11.307263 | 3.132059  | -3.139852 |
| 1 | -11.522474 | 4.259452  | -0.950213 |
| 1 | -11.501650 | -4.228177 | 1.246189  |
| 1 | -11.728944 | -4.149056 | -1.215002 |

Nanotube (7,5) u08v09  
B3LYP/STO-3G Energy: -7919.975737

|   |           |           |           |
|---|-----------|-----------|-----------|
| 6 | 10.880777 | 3.675801  | -1.795749 |
| 6 | 10.759058 | 4.067131  | -0.484648 |
| 6 | 10.580306 | -4.304282 | -0.301674 |
| 6 | 10.455976 | -4.005412 | -1.637736 |
| 6 | 10.455769 | 3.376139  | 2.434795  |
| 6 | 10.309571 | 2.462340  | 3.458030  |
| 6 | 10.179013 | -1.986001 | -3.862136 |
| 6 | 10.059821 | -0.681825 | -4.303794 |
| 6 | 9.983435  | -0.404837 | 4.341722  |
| 6 | 9.836638  | -1.752081 | 4.059093  |
| 6 | 9.820110  | 2.206345  | -3.542930 |
| 6 | 9.712842  | 3.197412  | -2.537305 |
| 6 | 9.543022  | -3.866043 | 1.950972  |
| 6 | 9.420100  | -4.229488 | 0.585807  |
| 6 | 9.462866  | 4.057982  | 0.191517  |
| 6 | 9.321488  | 3.759845  | 1.608608  |
| 6 | 9.164121  | -3.644862 | -2.216008 |
| 6 | 9.035556  | -2.691707 | -3.312254 |
| 6 | 9.014393  | 1.881320  | 3.764969  |
| 6 | 8.858900  | 0.502404  | 4.233137  |
| 6 | 8.787062  | 0.009771  | -4.262778 |
| 6 | 8.677353  | 1.448907  | -3.948700 |
| 6 | 8.553228  | -2.302577 | 3.681328  |
| 6 | 8.415740  | -3.389549 | 2.686231  |
| 6 | 8.408195  | 3.532715  | -2.007554 |
| 6 | 8.286726  | 3.995103  | -0.638701 |
| 6 | 8.111978  | -4.233841 | -0.031428 |
| 6 | 7.987271  | -3.965100 | -1.451274 |
| 6 | 8.008621  | 3.487597  | 2.138842  |
| 6 | 7.857009  | 2.558789  | 3.245590  |
| 6 | 7.733315  | -2.159632 | -3.626152 |
| 6 | 7.610808  | -0.802603 | -4.130308 |
| 6 | 7.547356  | -0.087984 | 4.229383  |
| 6 | 7.394135  | -1.510087 | 3.979137  |
| 6 | 7.365542  | 1.983653  | -3.639347 |
| 6 | 7.234952  | 3.070823  | -2.702691 |
| 6 | 7.094327  | -3.671243 | 2.159274  |
| 6 | 6.945329  | -4.148854 | 0.808811  |
| 6 | 6.969530  | 4.059471  | -0.038604 |
| 6 | 6.830107  | 3.842101  | 1.370035  |
| 6 | 6.670898  | -3.698560 | -1.997150 |
| 6 | 6.542838  | -2.817411 | -3.118119 |
| 6 | 6.528328  | 2.081977  | 3.588505  |
| 6 | 6.373226  | 0.763104  | 4.120791  |
| 6 | 6.291501  | -0.186669 | -4.179227 |
| 6 | 6.170519  | 1.226017  | -3.979472 |
| 6 | 6.061442  | -2.039930 | 3.718374  |
| 6 | 5.912455  | -3.160529 | 2.839564  |
| 6 | 5.917990  | 3.447595  | -2.210145 |
| 6 | 5.788663  | 3.985399  | -0.884729 |
| 6 | 5.622512  | -4.208929 | 0.203237  |
| 6 | 5.488424  | -4.023940 | -1.215720 |
| 6 | 5.506825  | 3.634158  | 1.932889  |



|   |           |           |           |
|---|-----------|-----------|-----------|
| 6 | 5.357387  | 2.777620  | 3.080752  |
| 6 | 5.228149  | -2.331292 | -3.497688 |
| 6 | 5.104922  | -1.014138 | -4.073582 |
| 6 | 5.047759  | 0.179625  | 4.212538  |
| 6 | 4.893567  | -1.248085 | 4.050148  |
| 6 | 4.860896  | 1.806475  | -3.751026 |
| 6 | 4.736065  | 2.961555  | -2.888878 |
| 6 | 4.592897  | -3.523938 | 2.361364  |
| 6 | 4.448499  | -4.097603 | 1.039600  |
| 6 | 4.476261  | 4.103136  | -0.286011 |
| 6 | 4.337675  | 3.963533  | 1.148716  |
| 6 | 4.177772  | -3.805227 | -1.786699 |
| 6 | 4.049910  | -2.975873 | -2.967527 |
| 6 | 4.041204  | 2.330993  | 3.469733  |
| 6 | 3.887543  | 1.026130  | 4.080287  |
| 6 | 3.800790  | -0.403246 | -4.174580 |
| 6 | 3.679464  | 1.033010  | -4.049802 |
| 6 | 3.577410  | -1.799107 | 3.836891  |
| 6 | 3.426407  | -2.977241 | 3.011445  |
| 6 | 3.430562  | 3.361293  | -2.418070 |
| 6 | 3.301056  | 3.975308  | -1.117035 |
| 6 | 3.137111  | -4.185126 | 0.440729  |
| 6 | 3.001298  | -4.076739 | -0.992231 |
| 6 | 3.022502  | 3.775106  | 1.719240  |
| 6 | 2.874689  | 2.983177  | 2.914136  |
| 6 | 2.740923  | -2.501943 | -3.361929 |
| 6 | 2.616387  | -1.220851 | -4.007093 |
| 6 | 2.565717  | 0.445649  | 4.189348  |
| 6 | 2.410099  | -0.981907 | 4.107171  |
| 6 | 2.370366  | 1.619660  | -3.842797 |
| 6 | 2.245556  | 2.816787  | -3.055404 |
| 6 | 2.105136  | -3.355641 | 2.547345  |
| 6 | 1.959412  | -4.002325 | 1.271337  |
| 6 | 1.984937  | 4.109607  | -0.520059 |
| 6 | 1.846246  | 4.050401  | 0.910633  |
| 6 | 1.685007  | -3.874418 | -1.570819 |
| 6 | 1.555307  | -3.116072 | -2.787262 |
| 6 | 1.550855  | 2.550553  | 3.324481  |
| 6 | 1.397062  | 1.290625  | 4.005400  |
| 6 | 1.305273  | -0.613132 | -4.139726 |
| 6 | 1.182931  | 0.822937  | -4.099345 |
| 6 | 1.085602  | -1.546633 | 3.925694  |
| 6 | 0.933081  | -2.768776 | 3.173397  |
| 6 | 0.933770  | 3.245345  | -2.608822 |
| 6 | 0.804338  | 3.936704  | -1.346677 |
| 6 | 0.641639  | -4.128351 | 0.679385  |
| 6 | 0.504944  | -4.106010 | -0.760196 |
| 6 | 0.529149  | 3.901278  | 1.495294  |
| 6 | 0.382977  | 3.177154  | 2.740029  |
| 6 | 0.246125  | -2.670165 | -3.214227 |
| 6 | 0.122271  | -1.421369 | -3.935747 |
| 6 | 0.077638  | 0.719978  | 4.158812  |
| 6 | -0.077638 | -0.720032 | 4.158803  |
| 6 | -0.122271 | 1.421419  | -3.935730 |
| 6 | -0.246125 | 2.670206  | -3.214195 |
| 6 | -0.382977 | -3.177190 | 2.739990  |
| 6 | -0.529149 | -3.901298 | 1.495246  |
| 6 | -0.504944 | 4.106019  | -0.760146 |
| 6 | -0.641639 | 4.128341  | 0.679436  |
| 6 | -0.804338 | -3.936686 | -1.346726 |
| 6 | -0.933770 | -3.245311 | -2.608861 |
| 6 | -0.933081 | 2.768734  | 3.173430  |
| 6 | -1.085602 | 1.546582  | 3.925712  |
| 6 | -1.182931 | -0.822885 | -4.099355 |
| 6 | -1.305272 | 0.613184  | -4.139719 |
| 6 | -1.397062 | -1.290677 | 4.005385  |
| 6 | -1.550855 | -2.550596 | 3.324451  |
| 6 | -1.555307 | 3.116108  | -2.787224 |
| 6 | -1.685007 | 3.874437  | -1.570771 |
| 6 | -1.846246 | -4.050413 | 0.910583  |

|   |           |           |           |
|---|-----------|-----------|-----------|
| 6 | -1.984938 | -4.109600 | -0.520109 |
| 6 | -1.959413 | 4.002307  | 1.271386  |
| 6 | -2.105135 | 3.355608  | 2.547386  |
| 6 | -2.245556 | -2.816748 | -3.055438 |
| 6 | -2.370366 | -1.619611 | -3.842817 |
| 6 | -2.410099 | 0.981854  | 4.107184  |
| 6 | -2.565717 | -0.445703 | 4.189344  |
| 6 | -2.616387 | 1.220902  | -4.007079 |
| 6 | -2.740923 | 2.501986  | -3.361900 |
| 6 | -2.874690 | -2.983215 | 2.914100  |
| 6 | -3.022503 | -3.775128 | 1.719194  |
| 6 | -3.001299 | 4.076751  | -0.992181 |
| 6 | -3.137111 | 4.185119  | 0.440780  |
| 6 | -3.301056 | -3.975293 | -1.117083 |
| 6 | -3.430561 | -3.361262 | -2.418111 |
| 6 | -3.426406 | 2.977202  | 3.011481  |
| 6 | -3.577409 | 1.799057  | 3.836913  |
| 6 | -3.679463 | -1.032959 | -4.049816 |
| 6 | -3.800789 | 0.403299  | -4.174577 |
| 6 | -3.887543 | -1.026183 | 4.080276  |
| 6 | -4.041205 | -2.331037 | 3.469705  |
| 6 | -4.049910 | 2.975910  | -2.967491 |
| 6 | -4.177772 | 3.805248  | -1.786652 |
| 6 | -4.337676 | -3.963548 | 1.148667  |
| 6 | -4.476262 | -4.103131 | -0.286061 |
| 6 | -4.448499 | 4.097588  | 1.039651  |
| 6 | -4.592897 | 3.523906  | 2.361407  |
| 6 | -4.736065 | -2.961518 | -2.888915 |
| 6 | -4.860896 | -1.806427 | -3.751048 |
| 6 | -4.893566 | 1.248033  | 4.050164  |
| 6 | -5.047759 | -0.179678 | 4.212536  |
| 6 | -5.104922 | 1.014189  | -4.073570 |
| 6 | -5.228150 | 2.331335  | -3.497660 |
| 6 | -5.357387 | -2.777659 | 3.080719  |
| 6 | -5.506826 | -3.634181 | 1.932844  |
| 6 | -5.488425 | 4.023953  | -1.215670 |
| 6 | -5.622512 | 4.208924  | 0.203289  |
| 6 | -5.788664 | -3.985386 | -0.884778 |
| 6 | -5.917990 | -3.447565 | -2.210187 |
| 6 | -5.912454 | 3.160492  | 2.839604  |
| 6 | -6.061442 | 2.039883  | 3.718400  |
| 6 | -6.170518 | -1.225967 | -3.979489 |
| 6 | -6.291500 | 0.186722  | -4.179226 |
| 6 | -6.373226 | -0.763156 | 4.120783  |
| 6 | -6.528329 | -2.082022 | 3.588481  |
| 6 | -6.542839 | 2.817449  | -3.118084 |
| 6 | -6.670899 | 3.698584  | -1.997104 |
| 6 | -6.830108 | -3.842117 | 1.369987  |
| 6 | -6.969531 | -4.059468 | -0.038654 |
| 6 | -6.945329 | 4.148842  | 0.808863  |
| 6 | -7.094326 | 3.671215  | 2.159321  |
| 6 | -7.234951 | -3.070788 | -2.702730 |
| 6 | -7.365541 | -1.983607 | -3.639374 |
| 6 | -7.394134 | 1.510038  | 3.979158  |
| 6 | -7.547356 | 0.087931  | 4.229386  |
| 6 | -7.610808 | 0.802654  | -4.130300 |
| 6 | -7.733315 | 2.159677  | -3.626127 |
| 6 | -7.857010 | -2.558829 | 3.245560  |
| 6 | -8.008622 | -3.487622 | 2.138799  |
| 6 | -7.987272 | 3.965115  | -1.451224 |
| 6 | -8.111978 | 4.233839  | -0.031375 |
| 6 | -8.286726 | -3.995092 | -0.638751 |
| 6 | -8.408195 | -3.532687 | -2.007598 |
| 6 | -8.415739 | 3.389515  | 2.686275  |
| 6 | -8.553227 | 2.302532  | 3.681358  |
| 6 | -8.677351 | -1.448857 | -3.948721 |
| 6 | -8.787061 | -0.009719 | -4.262782 |
| 6 | -8.858900 | -0.502457 | 4.233132  |
| 6 | -9.014394 | -1.881365 | 3.764947  |
| 6 | -9.035556 | 2.691747  | -3.312219 |

|   |            |           |           |
|---|------------|-----------|-----------|
| 6 | -9.164122  | 3.644886  | -2.215961 |
| 6 | -9.321489  | -3.759862 | 1.608561  |
| 6 | -9.462867  | -4.057979 | 0.191466  |
| 6 | -9.420099  | 4.229478  | 0.585861  |
| 6 | -9.543021  | 3.866022  | 1.951023  |
| 6 | -9.712842  | -3.197378 | -2.537346 |
| 6 | -9.820110  | -2.206302 | -3.542963 |
| 6 | -9.836638  | 1.752033  | 4.059120  |
| 6 | -9.983434  | 0.404785  | 4.341731  |
| 6 | -10.059821 | 0.681879  | -4.303792 |
| 6 | -10.179014 | 1.986048  | -3.862114 |
| 6 | -10.309572 | -2.462382 | 3.458000  |
| 6 | -10.455771 | -3.376166 | 2.434753  |
| 6 | -10.455978 | 4.005428  | -1.637684 |
| 6 | -10.580306 | 4.304284  | -0.301619 |
| 6 | -10.759059 | -4.067120 | -0.484700 |
| 6 | -10.880778 | -3.675776 | -1.795796 |
| 1 | 11.872205  | 3.590626  | -2.261934 |
| 1 | 11.659957  | 4.300936  | 0.097313  |
| 1 | 11.571990  | -4.473429 | 0.140428  |
| 1 | 11.355158  | -3.940799 | -2.264047 |
| 1 | 11.461799  | 3.714461  | 2.155599  |
| 1 | 11.201762  | 2.087804  | 3.976354  |
| 1 | 11.175151  | -2.442294 | -3.798583 |
| 1 | 10.964643  | -0.126276 | -4.582503 |
| 1 | 10.989590  | 0.000810  | 4.508443  |
| 1 | 10.730559  | -2.387145 | 4.008090  |
| 1 | 10.824562  | 1.867849  | -3.827707 |
| 1 | 10.553271  | -3.731986 | 2.358519  |
| 1 | -10.553263 | 3.731967  | 2.358570  |
| 1 | -10.824556 | -1.867808 | -3.827741 |
| 1 | -10.730558 | 2.387098  | 4.008129  |
| 1 | -10.989588 | -0.000863 | 4.508452  |
| 1 | -10.964641 | 0.126335  | -4.582517 |
| 1 | -11.175152 | 2.442342  | -3.798558 |
| 1 | -11.201763 | -2.087854 | 3.976331  |
| 1 | -11.461802 | -3.714484 | 2.155552  |
| 1 | -11.355159 | 3.940823  | -2.263996 |
| 1 | -11.571989 | 4.473430  | 0.140485  |
| 1 | -11.659958 | -4.300934 | 0.097258  |
| 1 | -11.872205 | -3.590599 | -2.261983 |

Nanotube (7,5) u08v10  
B3LYP/STO-3G Energy: -7995.270157

|   |           |           |           |
|---|-----------|-----------|-----------|
| 6 | 10.966580 | -3.181834 | 2.628226  |
| 6 | 10.829457 | -3.895128 | 1.462515  |
| 6 | 10.726850 | 4.151364  | -0.856513 |
| 6 | 10.610648 | 4.206980  | 0.511932  |
| 6 | 10.506284 | -3.973918 | -1.534614 |
| 6 | 10.359577 | -3.351564 | -2.756836 |
| 6 | 10.333771 | 2.828613  | 3.181294  |
| 6 | 10.206649 | 1.682495  | 3.942472  |
| 6 | 10.053474 | -0.802500 | -4.342946 |
| 6 | 9.922358  | 0.573529  | -4.413407 |
| 6 | 9.934834  | -1.301633 | 3.946496  |
| 6 | 9.809688  | -2.515496 | 3.229400  |
| 6 | 9.667066  | 3.160402  | -2.915000 |
| 6 | 9.558664  | 3.863149  | -1.688753 |
| 6 | 9.527216  | -4.044944 | 0.814477  |
| 6 | 9.375741  | -4.119007 | -0.629995 |
| 6 | 9.320118  | 4.020351  | 1.170687  |
| 6 | 9.191872  | 3.381993  | 2.474702  |
| 6 | 9.067089  | -2.853040 | -3.194151 |
| 6 | 8.920863  | -1.638885 | -3.998568 |
| 6 | 8.927141  | 1.016785  | 4.086770  |
| 6 | 8.801935  | -0.452665 | 4.152168  |
| 6 | 8.647350  | 1.217377  | -4.181346 |

|   |          |           |           |
|---|----------|-----------|-----------|
| 6 | 8.528729 | 2.523890  | -3.497628 |
| 6 | 8.497057 | -2.961397 | 2.811811  |
| 6 | 8.358950 | -3.758054 | 1.608593  |
| 6 | 8.255462 | 4.040781  | -1.086048 |
| 6 | 8.139701 | 4.146864  | 0.355667  |
| 6 | 8.060492 | -3.977177 | -1.204287 |
| 6 | 7.907683 | -3.361701 | -2.511265 |
| 6 | 7.887311 | 2.962513  | 2.922206  |
| 6 | 7.756850 | 1.781403  | 3.758132  |
| 6 | 7.615052 | -1.052140 | -4.138735 |
| 6 | 7.477956 | 0.388366  | -4.260414 |
| 6 | 7.482879 | -1.034643 | 3.999180  |
| 6 | 7.334357 | -2.324324 | 3.373258  |
| 6 | 7.214698 | 2.946959  | -3.053829 |
| 6 | 7.081306 | 3.756670  | -1.870038 |
| 6 | 7.036104 | -3.959810 | 1.053580  |
| 6 | 6.885797 | -4.109237 | -0.363004 |
| 6 | 6.825739 | 4.043735  | 0.958941  |
| 6 | 6.698796 | 3.480714  | 2.269196  |
| 6 | 6.580849 | -2.973306 | -2.956581 |
| 6 | 6.433858 | -1.833201 | -3.808427 |
| 6 | 6.433003 | 1.212964  | 3.970908  |
| 6 | 6.297840 | -0.202160 | 4.140880  |
| 6 | 6.153170 | 0.982632  | -4.136743 |
| 6 | 6.022498 | 2.292518  | -3.573898 |
| 6 | 6.010095 | -2.800250 | 3.002126  |
| 6 | 5.863812 | -3.657855 | 1.859910  |
| 6 | 5.764347 | 3.984513  | -1.292655 |
| 6 | 5.639828 | 4.170315  | 0.126558  |
| 6 | 5.559479 | -4.036594 | -0.951903 |
| 6 | 5.407637 | -3.501223 | -2.279425 |
| 6 | 5.382795 | 3.121664  | 2.767627  |
| 6 | 5.252443 | 1.998518  | 3.662494  |
| 6 | 5.113267 | -1.277179 | -4.038399 |
| 6 | 4.974500 | 0.145292  | -4.247368 |
| 6 | 4.980935 | -0.807642 | 4.077026  |
| 6 | 4.838318 | -2.143143 | 3.541471  |
| 6 | 4.710374 | 2.781740  | -3.197706 |
| 6 | 4.582097 | 3.675952  | -2.066774 |
| 6 | 4.544684 | -3.910428 | 1.319544  |
| 6 | 4.393954 | -4.140719 | -0.101614 |
| 6 | 4.331464 | 4.119287  | 0.741790  |
| 6 | 4.205369 | 3.621656  | 2.096041  |
| 6 | 4.091846 | -3.153667 | -2.761586 |
| 6 | 3.945469 | -2.048058 | -3.685856 |
| 6 | 3.943554 | 1.448276  | 3.925081  |
| 6 | 3.808643 | 0.029600  | 4.175069  |
| 6 | 3.665613 | 0.748068  | -4.176289 |
| 6 | 3.533183 | 2.100460  | -3.680566 |
| 6 | 3.525266 | -2.636779 | 3.198222  |
| 6 | 3.378373 | -3.562123 | 2.098476  |
| 6 | 3.276666 | 3.929196  | -1.503399 |
| 6 | 3.151169 | 4.191853  | -0.089281 |
| 6 | 3.075396 | -4.089471 | -0.692794 |
| 6 | 2.923998 | -3.627724 | -2.049923 |
| 6 | 2.895777 | 3.278744  | 2.605888  |
| 6 | 2.765149 | 2.207588  | 3.559477  |
| 6 | 2.628809 | -1.499836 | -3.932876 |
| 6 | 2.488214 | -0.097311 | -4.220854 |
| 6 | 2.493443 | -0.576429 | 4.134489  |
| 6 | 2.351410 | -1.934491 | 3.682465  |
| 6 | 2.220163 | 2.600836  | -3.322486 |
| 6 | 2.090943 | 3.553781  | -2.253511 |
| 6 | 2.056290 | -3.829848 | 1.564401  |
| 6 | 1.904400 | -4.135168 | 0.166950  |
| 6 | 1.838020 | 4.157503  | 0.528760  |
| 6 | 1.710790 | 3.736642  | 1.898657  |
| 6 | 1.600881 | -3.298034 | -2.548108 |
| 6 | 1.453343 | -2.254277 | -3.529037 |
| 6 | 1.449787 | 1.667943  | 3.850734  |

|   |           |           |           |
|---|-----------|-----------|-----------|
| 6 | 1.314722  | 0.272462  | 4.183303  |
| 6 | 1.171281  | 0.510804  | -4.183754 |
| 6 | 1.037210  | 1.886449  | -3.771250 |
| 6 | 1.031999  | -2.449626 | 3.369614  |
| 6 | 0.884862  | -3.438559 | 2.328134  |
| 6 | 0.779080  | 3.841498  | -1.706276 |
| 6 | 0.653083  | 4.187465  | -0.308595 |
| 6 | 0.582735  | -4.123485 | -0.427589 |
| 6 | 0.431568  | -3.738958 | -1.813698 |
| 6 | 0.400448  | 3.428356  | 2.432324  |
| 6 | 0.271261  | 2.408860  | 3.451367  |
| 6 | 0.137915  | -1.726292 | -3.816215 |
| 6 | -0.002812 | -0.334618 | -4.188985 |
| 6 | 0.002813  | -0.334427 | 4.189001  |
| 6 | -0.137915 | -1.726117 | 3.816294  |
| 6 | -0.271261 | 2.408703  | -3.451477 |
| 6 | -0.400448 | 3.428244  | -2.432480 |
| 6 | -0.431569 | -3.738874 | 1.813869  |
| 6 | -0.582736 | -4.123465 | 0.427777  |
| 6 | -0.653084 | 4.187479  | 0.308404  |
| 6 | -0.779080 | 3.841576  | 1.706101  |
| 6 | -0.884862 | -3.438665 | -2.327976 |
| 6 | -1.031999 | -2.449780 | -3.369502 |
| 6 | -1.037210 | 1.886621  | 3.771164  |
| 6 | -1.171280 | 0.510996  | 4.183732  |
| 6 | -1.314721 | 0.272271  | -4.183316 |
| 6 | -1.449786 | 1.667767  | -3.850810 |
| 6 | -1.453343 | -2.254116 | 3.529141  |
| 6 | -1.600881 | -3.297917 | 2.548259  |
| 6 | -1.710791 | 3.736555  | -1.898828 |
| 6 | -1.838021 | 4.157477  | -0.528950 |
| 6 | -1.904401 | -4.135175 | -0.166761 |
| 6 | -2.056290 | -3.829918 | -1.564225 |
| 6 | -2.090943 | 3.553883  | 2.253349  |
| 6 | -2.220162 | 2.600987  | 3.322368  |
| 6 | -2.351409 | -1.934659 | -3.682378 |
| 6 | -2.493441 | -0.576618 | -4.134464 |
| 6 | -2.488213 | -0.097118 | 4.220860  |
| 6 | -2.628808 | -1.499656 | 3.932946  |
| 6 | -2.765149 | 2.207425  | -3.559578 |
| 6 | -2.895778 | 3.278623  | -2.606038 |
| 6 | -2.923999 | -3.627629 | 2.050089  |
| 6 | -3.075397 | -4.089437 | 0.692981  |
| 6 | -3.151170 | 4.191855  | 0.089090  |
| 6 | -3.276667 | 3.929263  | 1.503220  |
| 6 | -3.378373 | -3.562218 | -2.098313 |
| 6 | -3.525266 | -2.636925 | -3.198103 |
| 6 | -3.533182 | 2.100628  | 3.680472  |
| 6 | -3.665612 | 0.748259  | 4.176258  |
| 6 | -3.808642 | 0.029409  | -4.175073 |
| 6 | -3.943553 | 1.448096  | -3.925149 |
| 6 | -3.945469 | -2.047888 | 3.685951  |
| 6 | -4.091846 | -3.153539 | 2.761730  |
| 6 | -4.205370 | 3.621558  | -2.096206 |
| 6 | -4.331465 | 4.119250  | -0.741978 |
| 6 | -4.393955 | -4.140711 | 0.101803  |
| 6 | -4.544685 | -3.910486 | -1.319365 |
| 6 | -4.582098 | 3.676045  | 2.066607  |
| 6 | -4.710374 | 2.781886  | 3.197581  |
| 6 | -4.838317 | -2.143305 | -3.541376 |
| 6 | -4.980934 | -0.807829 | -4.076993 |
| 6 | -4.974499 | 0.145486  | 4.247365  |
| 6 | -5.113266 | -1.276993 | 4.038460  |
| 6 | -5.252442 | 1.998349  | -3.662587 |
| 6 | -5.382796 | 3.121535  | -2.767771 |
| 6 | -5.407638 | -3.501115 | 2.279585  |
| 6 | -5.559480 | -4.036546 | 0.952087  |
| 6 | -5.639829 | 4.170305  | -0.126747 |
| 6 | -5.764348 | 3.984569  | 1.292473  |
| 6 | -5.863812 | -3.657938 | -1.859744 |

|   |            |           |           |
|---|------------|-----------|-----------|
| 6 | -6.010095  | -2.800387 | -3.002001 |
| 6 | -6.022497  | 2.292681  | 3.573797  |
| 6 | -6.153168  | 0.982822  | 4.136703  |
| 6 | -6.297839  | -0.202350 | -4.140876 |
| 6 | -6.433002  | 1.212781  | -3.970967 |
| 6 | -6.433858  | -1.833025 | 3.808513  |
| 6 | -6.580849  | -2.973167 | 2.956717  |
| 6 | -6.698796  | 3.480606  | -2.269355 |
| 6 | -6.825740  | 4.043686  | -0.959125 |
| 6 | -6.885798  | -4.109215 | 0.363191  |
| 6 | -7.036105  | -3.959854 | -1.053401 |
| 6 | -7.081306  | 3.756752  | 1.869868  |
| 6 | -7.214698  | 2.947098  | 3.053698  |
| 6 | -7.334356  | -2.324478 | -3.373157 |
| 6 | -7.482878  | -1.034827 | -3.999138 |
| 6 | -7.477955  | 0.388561  | 4.260402  |
| 6 | -7.615051  | -1.051949 | 4.138788  |
| 6 | -7.756850  | 1.781229  | -3.758217 |
| 6 | -7.887312  | 2.962375  | -2.922342 |
| 6 | -7.907685  | -3.361581 | 2.511417  |
| 6 | -8.060494  | -3.977115 | 1.204467  |
| 6 | -8.139702  | 4.146841  | -0.355855 |
| 6 | -8.255463  | 4.040825  | 1.085865  |
| 6 | -8.358951  | -3.758124 | -1.608424 |
| 6 | -8.497056  | -2.961524 | -2.811679 |
| 6 | -8.528729  | 2.524051  | 3.497518  |
| 6 | -8.647349  | 1.217569  | 4.181298  |
| 6 | -8.801934  | -0.452856 | -4.152155 |
| 6 | -8.927140  | 1.016597  | -4.086822 |
| 6 | -8.920863  | -1.638699 | 3.998647  |
| 6 | -9.067090  | -2.852889 | 3.194282  |
| 6 | -9.191873  | 3.381874  | -2.474856 |
| 6 | -9.320120  | 4.020290  | -1.170869 |
| 6 | -9.375743  | -4.118970 | 0.630181  |
| 6 | -9.527217  | -4.044976 | -0.814295 |
| 6 | -9.558664  | 3.863221  | 1.688579  |
| 6 | -9.667065  | 3.160534  | 2.914861  |
| 6 | -9.809688  | -2.515644 | -3.229291 |
| 6 | -9.934833  | -1.301815 | -3.946445 |
| 6 | -9.922356  | 0.573733  | 4.413390  |
| 6 | -10.053473 | -0.802299 | 4.342989  |
| 6 | -10.206648 | 1.682311  | -3.942553 |
| 6 | -10.333771 | 2.828461  | -3.181423 |
| 6 | -10.359578 | -3.351430 | 2.756987  |
| 6 | -10.506286 | -3.973837 | 1.534792  |
| 6 | -10.610649 | 4.206947  | -0.512122 |
| 6 | -10.726851 | 4.151395  | 0.856325  |
| 6 | -10.829457 | -3.895189 | -1.462340 |
| 6 | -10.966580 | -3.181953 | -2.628087 |
| 1 | 11.962798  | -2.991506 | 3.051102  |
| 1 | 11.722741  | -4.281244 | 0.954667  |
| 1 | 11.716285  | 4.191232  | -1.332887 |
| 1 | 11.514080  | 4.296430  | 1.128996  |
| 1 | 11.511337  | -4.241857 | -1.184501 |
| 1 | 11.250335  | -3.133561 | -3.360132 |
| 1 | 11.333133  | 3.243685  | 2.998187  |
| 1 | 11.108477  | 1.207428  | 4.349972  |
| 1 | 11.053907  | -1.249331 | -4.407282 |
| 1 | 10.822611  | 1.190231  | -4.532694 |
| 1 | 10.944564  | -0.912404 | 4.129315  |
| 1 | 10.672447  | 2.915043  | -3.280395 |
| 1 | -10.672444 | 2.915195  | 3.280269  |
| 1 | -10.944560 | -0.912597 | -4.129287 |
| 1 | -10.822609 | 1.190441  | 4.532650  |
| 1 | -11.053907 | -1.249127 | 4.407344  |
| 1 | -11.108476 | 1.207225  | -4.350031 |
| 1 | -11.333134 | 3.243538  | -2.998331 |
| 1 | -11.250336 | -3.133398 | 3.360273  |
| 1 | -11.511339 | -4.241789 | 1.184690  |
| 1 | -11.514081 | 4.296366  | -1.129190 |

|   |            |           |           |
|---|------------|-----------|-----------|
| 1 | -11.716285 | 4.191284  | 1.332698  |
| 1 | -11.722742 | -4.281279 | -0.954474 |
| 1 | -11.962797 | -2.991645 | -3.050972 |

Nanotube (7,5) u08v11  
B3LYP/STO-3G Energy: -8070.565078

|   |           |           |           |
|---|-----------|-----------|-----------|
| C | 10.924597 | 3.307617  | -2.486006 |
| C | 10.794085 | -3.848076 | 1.839816  |
| C | 10.664239 | -4.254403 | 0.526759  |
| C | 10.632602 | 4.163754  | 0.388009  |
| C | 10.493727 | 3.881502  | 1.738580  |
| C | 10.365848 | -3.621903 | -2.405801 |
| C | 10.237555 | -2.708351 | -3.445022 |
| C | 10.186030 | 1.839359  | 3.937576  |
| C | 10.047177 | 0.522246  | 4.366829  |
| C | 9.984564  | 0.172372  | -4.230465 |
| C | 9.878096  | 1.542204  | -3.844037 |
| C | 9.761725  | -2.364520 | 3.593875  |
| C | 9.639170  | -3.364388 | 2.580038  |
| C | 9.636577  | 3.640401  | -1.898701 |
| C | 9.500219  | 4.089726  | -0.507468 |
| C | 9.374487  | -4.246799 | -0.141278 |
| C | 9.235416  | -3.964386 | -1.578120 |
| C | 9.210420  | 3.534207  | 2.299577  |
| C | 9.063231  | 2.563762  | 3.402314  |
| C | 8.969997  | -2.097282 | -3.747606 |
| C | 8.853627  | -0.683532 | -4.194859 |
| C | 8.775980  | -0.146052 | 4.320341  |
| C | 8.642656  | -1.593424 | 3.995406  |
| C | 8.579182  | 2.088503  | -3.537625 |
| C | 8.460633  | 3.167134  | -2.575141 |
| C | 8.334354  | -3.673559 | 2.050601  |
| C | 8.203876  | -4.142690 | 0.684770  |
| C | 8.192839  | 4.103990  | 0.093195  |
| C | 8.048653  | 3.847757  | 1.513731  |
| C | 7.930545  | -3.654943 | -2.101364 |
| C | 7.797709  | -2.731605 | -3.211353 |
| C | 7.755857  | 2.039267  | 3.688894  |
| C | 7.610537  | 0.683595  | 4.179169  |
| C | 7.535898  | -0.070149 | -4.176273 |
| C | 7.402629  | 1.336689  | -3.904415 |
| C | 7.316594  | -2.101253 | 3.679611  |
| C | 7.166210  | -3.186626 | 2.746453  |
| C | 7.140847  | 3.518688  | -2.079745 |
| C | 7.005966  | 4.030232  | -0.746542 |
| C | 6.879915  | -4.190345 | 0.086578  |
| C | 6.741816  | -3.982461 | -1.327141 |
| C | 6.719846  | 3.605017  | 2.056428  |
| C | 6.573263  | 2.722987  | 3.181128  |
| C | 6.472346  | -2.231768 | -3.558723 |
| C | 6.345033  | -0.899237 | -4.094733 |
| C | 6.279499  | 0.090909  | 4.233015  |
| C | 6.136006  | -1.330806 | 4.029633  |
| C | 6.088393  | 1.906999  | -3.664510 |
| C | 5.962122  | 3.040967  | -2.772868 |
| C | 5.846051  | -3.550216 | 2.263611  |
| C | 5.707448  | -4.097474 | 0.928654  |
| C | 5.692383  | 4.131218  | -0.151188 |
| C | 5.550852  | 3.953804  | 1.283257  |
| C | 5.431397  | -3.758604 | -1.889905 |
| C | 5.299466  | -2.894842 | -3.052442 |
| C | 5.261636  | 2.260306  | 3.557668  |
| C | 5.116857  | 0.930798  | 4.131994  |
| C | 5.041713  | -0.288100 | -4.174643 |
| C | 4.914028  | 1.148035  | -3.999236 |
| C | 4.825981  | -1.885418 | 3.799524  |
| C | 4.680676  | -3.042341 | 2.934278  |

|   |           |           |           |
|---|-----------|-----------|-----------|
| C | 4.656780  | 3.430260  | -2.301919 |
| C | 4.522374  | 4.017665  | -0.984879 |
| C | 4.398025  | -4.186624 | 0.332022  |
| C | 4.259977  | -4.050011 | -1.102048 |
| C | 4.240456  | 3.745481  | 1.844530  |
| C | 4.095296  | 2.916770  | 3.020360  |
| C | 3.990341  | -2.414361 | -3.428398 |
| C | 3.860823  | -1.110642 | -4.033696 |
| C | 3.801107  | 0.341155  | 4.220823  |
| C | 3.654521  | -1.088866 | 4.093989  |
| C | 3.604394  | 1.724057  | -3.779157 |
| C | 3.475325  | 2.901939  | -2.956092 |
| C | 3.363249  | -3.418986 | 2.464275  |
| C | 3.221083  | -4.035117 | 1.166619  |
| C | 3.204701  | 4.133315  | -0.389656 |
| C | 3.063632  | 4.036713  | 1.044157  |
| C | 2.942044  | -3.842125 | -1.672479 |
| C | 2.807953  | -3.048279 | -2.873592 |
| C | 2.774111  | 2.467058  | 3.415471  |
| C | 2.628137  | 1.180687  | 4.062560  |
| C | 2.548901  | -0.504883 | -4.147793 |
| C | 2.421816  | 0.936247  | -4.063074 |
| C | 2.335881  | -1.655946 | 3.897835  |
| C | 2.190994  | -2.862991 | 3.106296  |
| C | 2.164413  | 3.316683  | -2.505138 |
| C | 2.030351  | 3.977619  | -1.219467 |
| C | 1.907495  | -4.157138 | 0.575252  |
| C | 1.769264  | -4.097477 | -0.869694 |
| C | 1.751581  | 3.863809  | 1.620674  |
| C | 1.608236  | 3.099007  | 2.848051  |
| C | 1.501763  | -2.593226 | -3.282068 |
| C | 1.372995  | -1.319026 | -3.965871 |
| C | 1.317113  | 0.597274  | 4.193705  |
| C | 1.170979  | -0.845925 | 4.150783  |
| C | 1.118602  | 1.524044  | -3.880715 |
| C | 0.989702  | 2.753558  | -3.124493 |
| C | 0.880505  | -3.265434 | 2.660402  |
| C | 0.737623  | -3.956444 | 1.396028  |
| C | 0.720972  | 4.122008  | -0.630672 |
| C | 0.580946  | 4.103025  | 0.808703  |
| C | 0.458400  | -3.914290 | -1.448051 |
| C | 0.323590  | -3.187433 | -2.689131 |
| C | 0.293432  | 2.667234  | 3.263243  |
| C | 0.146950  | 1.422490  | 3.980657  |
| C | 0.063997  | -0.720183 | -4.107515 |
| C | -0.063993 | 0.717578  | -4.107973 |
| C | -0.146945 | -1.419963 | 3.981562  |
| C | -0.293430 | -2.665163 | 3.264941  |
| C | -0.323593 | 3.185728  | -2.691160 |
| C | -0.458406 | 3.913371  | -1.450541 |
| C | -0.580951 | -4.102509 | 0.811313  |
| C | -0.720977 | -4.122402 | -0.628049 |
| C | -0.737626 | 3.957326  | 1.393511  |
| C | -0.880504 | 3.267120  | 2.658324  |
| C | -0.989701 | -2.755537 | -3.122741 |
| C | -1.118597 | -1.526505 | -3.879747 |
| C | -1.170971 | 0.848560  | 4.150249  |
| C | -1.317106 | -0.594611 | 4.194090  |
| C | -1.372992 | 1.316509  | -3.966715 |
| C | -1.501765 | 2.591142  | -3.283720 |
| C | -1.608237 | -3.097195 | 2.850025  |
| C | -1.751586 | -3.862773 | 1.623132  |
| C | -1.769271 | 4.096917  | -0.872299 |
| C | -1.907500 | 4.157494  | 0.572610  |
| C | -2.030355 | -3.978383 | -1.216937 |
| C | -2.164412 | -3.318267 | -2.503029 |
| C | -2.190989 | 2.864960  | 3.104480  |
| C | -2.335873 | 1.658421  | 3.896791  |
| C | -2.421811 | -0.938826 | -4.062487 |
| C | -2.548897 | 0.502249  | -4.148124 |



|   |           |           |           |
|---|-----------|-----------|-----------|
| C | -2.628132 | -1.178106 | 4.063321  |
| C | -2.774112 | -2.464885 | 3.417045  |
| C | -2.807958 | 3.046448  | -2.875532 |
| C | -2.942052 | 3.841051  | -1.674919 |
| C | -3.063638 | -4.036034 | 1.046723  |
| C | -3.204706 | -4.133547 | -0.387029 |
| C | -3.221085 | 4.035845  | 1.164057  |
| C | -3.363246 | 3.420545  | 2.462107  |
| C | -3.475321 | -2.903813 | -2.954253 |
| C | -3.604387 | -1.726457 | -3.778074 |
| C | -3.654512 | 1.091469  | 4.093315  |
| C | -3.801101 | -0.338471 | 4.221058  |
| C | -3.860821 | 1.108077  | -4.034415 |
| C | -3.990346 | 2.412177  | -3.429937 |
| C | -4.095300 | -2.914839 | 3.022216  |
| C | -4.240463 | -3.744289 | 1.846909  |
| C | -4.259986 | 4.049289  | -1.104616 |
| C | -4.398031 | 4.186814  | 0.329367  |
| C | -4.522377 | -4.018273 | -0.982328 |
| C | -4.656777 | -3.431715 | -2.299747 |
| C | -4.680669 | 3.044203  | 2.932361  |
| C | -4.825970 | 1.887837  | 3.798351  |
| C | -4.914020 | -1.150580 | -3.998529 |
| C | -5.041709 | 0.285443  | -4.174847 |
| C | -5.116852 | -0.928165 | 4.132605  |
| C | -5.261639 | -2.258032 | 3.559111  |
| C | -5.299474 | 2.892885  | -3.054280 |
| C | -5.431408 | 3.757375  | -1.892284 |
| C | -5.550860 | -3.952957 | 1.285763  |
| C | -5.692389 | -4.131286 | -0.148568 |
| C | -5.707450 | 4.098041  | 0.926061  |
| C | -5.846046 | 3.551648  | 2.261373  |
| C | -5.962116 | -3.042728 | -2.770955 |
| C | -6.088383 | -1.909336 | -3.663328 |
| C | -6.135994 | 1.333377  | 4.028825  |
| C | -6.279491 | -0.088209 | 4.233106  |
| C | -6.345031 | 0.896625  | -4.095325 |
| C | -6.472352 | 2.229489  | -3.560145 |
| C | -6.573269 | -2.720939 | 3.182857  |
| C | -6.719855 | -3.603671 | 2.058708  |
| C | -6.741828 | 3.981574  | -1.329655 |
| C | -6.879922 | 4.190362  | 0.083931  |
| C | -7.005970 | -4.030678 | -0.743992 |
| C | -7.140844 | -3.520001 | -2.077528 |
| C | -7.166201 | 3.188375  | 2.744461  |
| C | -7.316582 | 2.103605  | 3.678322  |
| C | -7.402619 | -1.339185 | -3.903610 |
| C | -7.535891 | 0.067480  | -4.176354 |
| C | -7.610532 | -0.680922 | 4.179635  |
| C | -7.755860 | -2.036895 | 3.690196  |
| C | -7.797720 | 2.729529  | -3.213080 |
| C | -7.930559 | 3.653555  | -2.103663 |
| C | -8.048664 | -3.846742 | 1.516159  |
| C | -8.192847 | -4.103885 | 0.095787  |
| C | -8.203879 | 4.143090  | 0.682162  |
| C | -8.334349 | 3.674856  | 2.048300  |
| C | -8.460626 | -3.168774 | -2.573163 |
| C | -8.579170 | -2.090771 | -3.536351 |
| C | -8.642642 | 1.595987  | 3.994456  |
| C | -8.775970 | 0.148819  | 4.320298  |
| C | -8.853624 | 0.680844  | -4.195332 |
| C | -8.970005 | 2.094865  | -3.748940 |
| C | -9.063237 | -2.561557 | 3.403936  |
| C | -9.210432 | -3.532684 | 2.301800  |
| C | -9.235431 | 3.963315  | -1.580606 |
| C | -9.374496 | 4.246655  | -0.143946 |
| C | -9.500224 | -4.090004 | -0.504892 |
| C | -9.636574 | -3.641599 | -1.896423 |
| C | -9.639160 | 3.366040  | 2.577954  |
| C | -9.761710 | 2.366836  | 3.592447  |

|   |            |           |           |
|---|------------|-----------|-----------|
| C | -9.878084  | -1.544678 | -3.843132 |
| C | -9.984554  | -0.175091 | -4.230427 |
| C | -10.047171 | -0.519443 | 4.367201  |
| C | -10.186032 | -1.836818 | 3.938753  |
| C | -10.237568 | 2.706099  | -3.446716 |
| C | -10.365865 | 3.620292  | -2.408059 |
| C | -10.493741 | -3.880314 | 1.741016  |
| C | -10.632613 | -4.163434 | 0.390626  |
| C | -10.664243 | 4.254698  | 0.524096  |
| C | -10.794079 | 3.849244  | 1.837424  |
| C | -10.924588 | -3.309216 | -2.483968 |
| C | -11.043276 | -2.315913 | -3.433538 |
| H | 12.035763  | 1.999431  | -3.786653 |
| H | 11.830478  | 3.784056  | -2.089561 |
| H | 11.790533  | -3.753446 | 2.293265  |
| H | 11.565536  | -4.484424 | -0.055920 |
| H | 11.639105  | 4.303222  | -0.026533 |
| H | 11.393569  | 3.802405  | 2.362109  |
| H | 11.368142  | -3.967742 | -2.122617 |
| H | 11.143078  | -2.353993 | -3.954350 |
| H | 11.192937  | 2.269854  | 3.864328  |
| H | 10.949704  | -0.049719 | 4.618441  |
| H | 10.991352  | -0.257812 | -4.307917 |
| H | 10.773882  | -2.040137 | 3.867928  |
| H | -10.773866 | 2.042641  | 3.866727  |
| H | -10.991344 | 0.255036  | -4.308170 |
| H | -10.949694 | 0.052682  | 4.618463  |
| H | -11.192942 | -2.267351 | 3.865770  |
| H | -11.143092 | 2.351409  | -3.955814 |
| H | -11.368163 | 3.966286  | -2.125078 |
| H | -11.393585 | -3.800802 | 2.364488  |
| H | -11.639115 | -4.303151 | -0.023832 |
| H | -11.565544 | 4.484335  | -0.058727 |
| H | -11.790523 | 3.754919  | 2.290945  |
| H | -11.830470 | -3.785406 | -2.087228 |
| H | -12.035746 | -2.001899 | -3.785497 |

Nanotube (7,5) u09v00  
B3LYP/STO-3G Energy: -8145.863738

|   |            |           |           |
|---|------------|-----------|-----------|
| 6 | -11.179129 | -1.411357 | -3.829906 |
| 6 | -11.045985 | -2.615179 | -3.170366 |
| 6 | -10.893402 | 3.204214  | 2.841068  |
| 6 | -10.779127 | 3.935929  | 1.676171  |
| 6 | -10.718710 | -4.178017 | -0.614138 |
| 6 | -10.565656 | -4.249642 | 0.762059  |
| 6 | -10.511250 | 4.074266  | -1.324089 |
| 6 | -10.391347 | 3.455780  | -2.562406 |
| 6 | -10.241370 | -2.832445 | 3.405086  |
| 6 | -10.102736 | -1.667328 | 4.154040  |
| 6 | -10.137426 | 0.870309  | -4.056928 |
| 6 | -10.021549 | -0.551862 | -4.036643 |
| 6 | -9.836878  | 1.322760  | 4.141850  |
| 6 | -9.728965  | 2.550794  | 3.419293  |
| 6 | -9.750010  | -3.078121 | -2.699501 |
| 6 | -9.596578  | -3.868477 | -1.471874 |
| 6 | -9.496533  | 4.105586  | 1.014994  |
| 6 | -9.372565  | 4.200695  | -0.447271 |
| 6 | -9.277145  | -4.047769 | 1.380482  |
| 6 | -9.121331  | -3.389533 | 2.692474  |
| 6 | -9.124774  | 2.948802  | -3.022670 |
| 6 | -9.008820  | 1.696131  | -3.815998 |
| 6 | -8.834170  | -1.001412 | 4.267440  |
| 6 | -8.710250  | 0.481673  | 4.321948  |
| 6 | -8.716909  | -1.149650 | -3.894138 |
| 6 | -8.583646  | -2.438767 | -3.242678 |
| 6 | -8.430727  | 2.993463  | 2.975178  |
| 6 | -8.316800  | 3.799191  | 1.774930  |
| 6 | -8.282396  | -4.027338 | -0.907843 |

|   |           |           |           |
|---|-----------|-----------|-----------|
| 6 | -8.123145 | -4.142285 | 0.529445  |
| 6 | -8.072437 | 4.042528  | -1.044905 |
| 6 | -7.948783 | 3.432981  | -2.354725 |
| 6 | -7.812728 | -2.946977 | 3.090588  |
| 6 | -7.667156 | -1.760029 | 3.908599  |
| 6 | -7.688598 | 1.107159  | -3.968426 |
| 6 | -7.547341 | -0.321252 | -4.067099 |
| 6 | -7.389487 | 1.061542  | 4.134917  |
| 6 | -7.253502 | 2.350733  | 3.510682  |
| 6 | -7.257006 | -2.896697 | -2.867217 |
| 6 | -7.105391 | -3.732327 | -1.712029 |
| 6 | -6.999612 | 4.005927  | 1.196096  |
| 6 | -6.876372 | 4.167828  | -0.224311 |
| 6 | -6.788960 | -4.036926 | 1.102932  |
| 6 | -6.632905 | -3.470498 | 2.413456  |
| 6 | -6.625143 | 3.045875  | -2.830653 |
| 6 | -6.499210 | 1.895516  | -3.689670 |
| 6 | -6.337139 | -1.192158 | 4.098723  |
| 6 | -6.201546 | 0.234398  | 4.264486  |
| 6 | -6.227757 | -0.925348 | -3.994950 |
| 6 | -6.087604 | -2.249132 | -3.426196 |
| 6 | -5.939303 | 2.834379  | 3.125197  |
| 6 | -5.817381 | 3.706938  | 1.975122  |
| 6 | -5.784274 | -3.974139 | -1.175708 |
| 6 | -5.627066 | -4.169076 | 0.254558  |
| 6 | -5.570589 | 4.103012  | -0.838190 |
| 6 | -5.448434 | 3.565443  | -2.183667 |
| 6 | -5.317915 | -3.110788 | 2.882494  |
| 6 | -5.171675 | -1.971021 | 3.775702  |
| 6 | -5.193954 | 1.333666  | -3.936479 |
| 6 | -5.059624 | -0.098800 | -4.136025 |
| 6 | -4.895582 | 0.837690  | 4.172636  |
| 6 | -4.764671 | 2.179191  | 3.632254  |
| 6 | -4.775673 | -2.738344 | -3.084907 |
| 6 | -4.624626 | -3.643466 | -1.964205 |
| 6 | -4.514872 | 3.954863  | 1.409252  |
| 6 | -4.392121 | 4.190787  | -0.013532 |
| 6 | -4.311182 | -4.102666 | 0.837025  |
| 6 | -4.155427 | -3.600420 | 2.183913  |
| 6 | -4.141697 | 3.204803  | -2.682156 |
| 6 | -4.014360 | 2.099653  | -3.601498 |
| 6 | -3.857075 | -1.415187 | 3.998850  |
| 6 | -3.717792 | 0.000312  | 4.241079  |
| 6 | -3.745431 | -0.703633 | -4.084130 |
| 6 | -3.603500 | -2.052325 | -3.592995 |
| 6 | -3.454051 | 2.672434  | 3.262332  |
| 6 | -3.328773 | 3.601544  | 2.165685  |
| 6 | -3.299792 | -3.899397 | -1.431915 |
| 6 | -3.142575 | -4.171711 | -0.023415 |
| 6 | -3.079380 | 4.142814  | -0.630455 |
| 6 | -2.955256 | 3.682686  | -1.994611 |
| 6 | -2.830437 | -3.256834 | 2.666292  |
| 6 | -2.681651 | -2.178168 | 3.618109  |
| 6 | -2.700616 | 1.551188  | -3.878734 |
| 6 | -2.567910 | 0.137884  | -4.167670 |
| 6 | -2.402456 | 0.607440  | 4.183714  |
| 6 | -2.271661 | 1.977621  | 3.728797  |
| 6 | -2.285686 | -2.561387 | -3.277747 |
| 6 | -2.135239 | -3.529749 | -2.206894 |
| 6 | -2.021227 | 3.880287  | 1.613196  |
| 6 | -1.898543 | 4.192739  | 0.200282  |
| 6 | -1.823748 | -4.144068 | 0.564236  |
| 6 | -1.668219 | -3.716173 | 1.944378  |
| 6 | -1.650790 | 3.355157  | -2.517804 |
| 6 | -1.525055 | 2.298497  | -3.505733 |
| 6 | -1.370260 | -1.639306 | 3.880416  |
| 6 | -1.230684 | -0.232141 | 4.208488  |
| 6 | -1.260437 | -0.469054 | -4.155842 |
| 6 | -1.119817 | -1.851411 | -3.743336 |
| 6 | -0.967652 | 2.491104  | 3.390411  |

|   |           |           |           |
|---|-----------|-----------|-----------|
| 6 | -0.842169 | 3.485380  | 2.344534  |
| 6 | -0.819319 | -3.813642 | -1.689193 |
| 6 | -0.662780 | -4.161977 | -0.294149 |
| 6 | -0.593450 | 4.172147  | -0.417649 |
| 6 | -0.469162 | 3.785537  | -1.804261 |
| 6 | -0.350160 | -3.395193 | 2.440663  |
| 6 | -0.199641 | -2.373216 | 3.449499  |
| 6 | -0.215274 | 1.763585  | -3.807264 |
| 6 | -0.082633 | 0.375209  | -4.178447 |
| 6 | 0.082633  | 0.375182  | 4.178450  |
| 6 | 0.215274  | 1.763560  | 3.807276  |
| 6 | 0.199641  | -2.373194 | -3.449513 |
| 6 | 0.350160  | -3.395177 | -2.440685 |
| 6 | 0.469162  | 3.785525  | 1.804286  |
| 6 | 0.593450  | 4.172144  | 0.417677  |
| 6 | 0.662780  | -4.161979 | 0.294123  |
| 6 | 0.819319  | -3.813654 | 1.689169  |
| 6 | 0.842169  | 3.485395  | -2.344511 |
| 6 | 0.967652  | 2.491126  | -3.390395 |
| 6 | 1.119817  | -1.851435 | 3.743324  |
| 6 | 1.260437  | -0.469081 | 4.155839  |
| 6 | 1.230684  | -0.232114 | -4.208489 |
| 6 | 1.370260  | -1.639281 | -3.880426 |
| 6 | 1.525055  | 2.298474  | 3.505748  |
| 6 | 1.650790  | 3.355141  | 2.517827  |
| 6 | 1.668219  | -3.716160 | -1.944401 |
| 6 | 1.823748  | -4.144065 | -0.564262 |
| 6 | 1.898543  | 4.192740  | -0.200255 |
| 6 | 2.021227  | 3.880297  | -1.613171 |
| 6 | 2.135239  | -3.529763 | 2.206872  |
| 6 | 2.285686  | -2.561408 | 3.277731  |
| 6 | 2.271661  | 1.977645  | -3.728784 |
| 6 | 2.402456  | 0.607467  | -4.183709 |
| 6 | 2.567910  | 0.137857  | 4.167672  |
| 6 | 2.700616  | 1.551163  | 3.878744  |
| 6 | 2.681651  | -2.178144 | -3.618122 |
| 6 | 2.830437  | -3.256816 | -2.666313 |
| 6 | 2.955256  | 3.682674  | 1.994635  |
| 6 | 3.079380  | 4.142810  | 0.630482  |
| 6 | 3.142575  | -4.171712 | 0.023388  |
| 6 | 3.299792  | -3.899406 | 1.431890  |
| 6 | 3.328773  | 3.601558  | -2.165661 |
| 6 | 3.454051  | 2.672455  | -3.262315 |
| 6 | 3.603501  | -2.052349 | 3.592982  |
| 6 | 3.745432  | -0.703660 | 4.084126  |
| 6 | 3.717792  | 0.000339  | -4.241078 |
| 6 | 3.857075  | -1.415161 | -3.998858 |
| 6 | 4.014361  | 2.099630  | 3.601511  |
| 6 | 4.141697  | 3.204786  | 2.682177  |
| 6 | 4.155427  | -3.600407 | -2.183936 |
| 6 | 4.311182  | -4.102661 | -0.837052 |
| 6 | 4.392121  | 4.190787  | 0.013559  |
| 6 | 4.514872  | 3.954873  | -1.409226 |
| 6 | 4.624626  | -3.643479 | 1.964182  |
| 6 | 4.775673  | -2.738364 | 3.084890  |
| 6 | 4.764670  | 2.179214  | -3.632240 |
| 6 | 4.895582  | 0.837717  | -4.172630 |
| 6 | 5.059625  | -0.098827 | 4.136023  |
| 6 | 5.193954  | 1.333641  | 3.936486  |
| 6 | 5.171675  | -1.970997 | -3.775714 |
| 6 | 5.317914  | -3.110769 | -2.882514 |
| 6 | 5.448434  | 3.565429  | 2.183690  |
| 6 | 5.570590  | 4.103007  | 0.838216  |
| 6 | 5.627066  | -4.169076 | -0.254585 |
| 6 | 5.784274  | -3.974148 | 1.175683  |
| 6 | 5.817381  | 3.706951  | -1.975099 |
| 6 | 5.939302  | 2.834400  | -3.125178 |
| 6 | 6.087605  | -2.249155 | 3.426181  |
| 6 | 6.227757  | -0.925374 | 3.994943  |
| 6 | 6.201545  | 0.234426  | -4.264484 |

|   |            |           |           |
|---|------------|-----------|-----------|
| 6 | 6.337138   | -1.192131 | -4.098730 |
| 6 | 6.499210   | 1.895492  | 3.689681  |
| 6 | 6.625143   | 3.045857  | 2.830672  |
| 6 | 6.632905   | -3.470483 | -2.413479 |
| 6 | 6.788960   | -4.036919 | -1.102958 |
| 6 | 6.876372   | 4.167827  | 0.224337  |
| 6 | 6.999612   | 4.005935  | -1.196070 |
| 6 | 7.105391   | -3.732339 | 1.712004  |
| 6 | 7.257006   | -2.896716 | 2.867197  |
| 6 | 7.253501   | 2.350756  | -3.510667 |
| 6 | 7.389487   | 1.061569  | -4.134910 |
| 6 | 7.547341   | -0.321278 | 4.067095  |
| 6 | 7.688598   | 1.107133  | 3.968432  |
| 6 | 7.667156   | -1.760004 | -3.908610 |
| 6 | 7.812728   | -2.946957 | -3.090607 |
| 6 | 7.948783   | 3.432966  | 2.354747  |
| 6 | 8.072437   | 4.042522  | 1.044930  |
| 6 | 8.123145   | -4.142283 | -0.529472 |
| 6 | 8.282396   | -4.027345 | 0.907816  |
| 6 | 8.316799   | 3.799203  | -1.774907 |
| 6 | 8.430727   | 2.993482  | -2.975160 |
| 6 | 8.583646   | -2.438788 | 3.242661  |
| 6 | 8.716909   | -1.149676 | 3.894130  |
| 6 | 8.710249   | 0.481702  | -4.321946 |
| 6 | 8.834170   | -1.001385 | -4.267447 |
| 6 | 9.008820   | 1.696106  | 3.816010  |
| 6 | 9.124775   | 2.948783  | 3.022688  |
| 6 | 9.121331   | -3.389515 | -2.692496 |
| 6 | 9.277144   | -4.047761 | -1.380508 |
| 6 | 9.372565   | 4.200694  | 0.447297  |
| 6 | 9.496533   | 4.105594  | -1.014969 |
| 6 | 9.596578   | -3.868489 | 1.471849  |
| 6 | 9.750010   | -3.078140 | 2.699480  |
| 6 | 9.728965   | 2.550817  | -3.419278 |
| 6 | 9.836877   | 1.322788  | -4.141844 |
| 6 | 10.021549  | -0.551889 | 4.036641  |
| 6 | 10.137425  | 0.870283  | 4.056938  |
| 6 | 10.102736  | -1.667300 | -4.154051 |
| 6 | 10.241370  | -2.832422 | -3.405104 |
| 6 | 10.391348  | 3.455765  | 2.562428  |
| 6 | 10.511251  | 4.074259  | 1.324115  |
| 6 | 10.565655  | -4.249639 | -0.762087 |
| 6 | 10.718710  | -4.178024 | 0.614110  |
| 6 | 10.779126  | 3.935941  | -1.676148 |
| 6 | 10.893402  | 3.204234  | -2.841050 |
| 6 | 11.045985  | -2.615200 | 3.170349  |
| 6 | 11.179129  | -1.411381 | 3.829897  |
| 1 | -12.176666 | -1.025182 | -4.081457 |
| 1 | -11.945208 | -3.185241 | -2.903391 |
| 1 | -11.884485 | 2.992997  | 3.266050  |
| 1 | -11.687031 | 4.306005  | 1.182579  |
| 1 | -11.729209 | -4.215210 | -1.040652 |
| 1 | -11.458598 | -4.340116 | 1.394003  |
| 1 | -11.511448 | 4.331870  | -0.952948 |
| 1 | -11.301101 | 3.238195  | -3.136907 |
| 1 | -11.247477 | -3.236526 | 3.234319  |
| 1 | -11.004568 | -1.184033 | 4.551786  |
| 1 | -11.146714 | 1.299286  | -4.010741 |
| 1 | -10.844972 | 0.932484  | 4.332538  |
| 1 | 10.844971  | 0.932515  | -4.332537 |
| 1 | 11.146714  | 1.299260  | 4.010761  |
| 1 | 11.004567  | -1.184004 | -4.551794 |
| 1 | 11.247477  | -3.236503 | -3.234337 |
| 1 | 11.301102  | 3.238177  | 3.136927  |
| 1 | 11.511448  | 4.331866  | 0.952976  |
| 1 | 11.458597  | -4.340109 | -1.394032 |
| 1 | 11.729208  | -4.215221 | 1.040623  |
| 1 | 11.687031  | 4.306015  | -1.182555 |
| 1 | 11.884485  | 2.993019  | -3.266033 |
| 1 | 11.945208  | -3.185260 | 2.903370  |

1 12.176665 -1.025209 4.081451

Nanotube (7,5) u09v01  
B3LYP/STO-3G Energy: -8221.162053

|   |            |           |           |
|---|------------|-----------|-----------|
| 6 | -11.237867 | -0.355310 | -4.159540 |
| 6 | -11.113415 | -1.687699 | -3.828052 |
| 6 | -11.029320 | 2.395178  | 3.478026  |
| 6 | -10.901545 | 3.399541  | 2.540320  |
| 6 | -10.818201 | -3.852018 | -1.751005 |
| 6 | -10.681548 | -4.273823 | -0.437827 |
| 6 | -10.598777 | 4.299531  | -0.322014 |
| 6 | -10.464146 | 4.019338  | -1.675692 |
| 6 | -10.386675 | -3.584215 | 2.484222  |
| 6 | -10.255680 | -2.651530 | 3.508514  |
| 6 | -10.192437 | 1.904376  | -3.781254 |
| 6 | -10.077209 | 0.524860  | -4.124827 |
| 6 | -9.988084  | 0.240335  | 4.265598  |
| 6 | -9.871498  | 1.611436  | 3.882622  |
| 6 | -9.823092  | -2.260142 | -3.474971 |
| 6 | -9.685190  | -3.337782 | -2.488739 |
| 6 | -9.610974  | 3.728366  | 1.958359  |
| 6 | -9.470057  | 4.193978  | 0.571107  |
| 6 | -9.399629  | -4.242426 | 0.226282  |
| 6 | -9.258517  | -3.943705 | 1.664324  |
| 6 | -9.191582  | 3.644010  | -2.236332 |
| 6 | -9.066130  | 2.637093  | -3.323158 |
| 6 | -8.987452  | -2.041417 | 3.802784  |
| 6 | -8.863440  | -0.622651 | 4.236909  |
| 6 | -8.774397  | -0.094171 | -4.125088 |
| 6 | -8.649804  | -1.507654 | -3.823671 |
| 6 | -8.567970  | 2.149034  | 3.581155  |
| 6 | -8.440242  | 3.234710  | 2.628141  |
| 6 | -8.377927  | -3.641421 | -1.969583 |
| 6 | -8.235915  | -4.121189 | -0.607693 |
| 6 | -8.163059  | 4.191211  | -0.032376 |
| 6 | -8.023909  | 3.937476  | -1.453391 |
| 6 | -7.954289  | -3.623619 | 2.177471  |
| 6 | -7.817207  | -2.686718 | 3.274387  |
| 6 | -7.744665  | 2.102388  | -3.606228 |
| 6 | -7.602712  | 0.746554  | -4.066015 |
| 6 | -7.540697  | -0.018455 | 4.218935  |
| 6 | -7.397286  | 1.387020  | 3.947049  |
| 6 | -7.328361  | -2.051107 | -3.562129 |
| 6 | -7.191477  | -3.154785 | -2.657848 |
| 6 | -7.116558  | 3.578575  | 2.136104  |
| 6 | -6.976892  | 4.098327  | 0.806424  |
| 6 | -6.908620  | -4.171182 | -0.011304 |
| 6 | -6.767316  | -3.959953 | 1.401605  |
| 6 | -6.694579  | 3.680576  | -1.997341 |
| 6 | -6.558256  | 2.788706  | -3.120189 |
| 6 | -6.488876  | -2.190590 | 3.617551  |
| 6 | -6.354323  | -0.855256 | 4.144417  |
| 6 | -6.283838  | 0.139252  | -4.134808 |
| 6 | -6.151370  | -1.285767 | -3.922799 |
| 6 | -6.078194  | 1.949022  | 3.712439  |
| 6 | -5.943083  | 3.086482  | 2.826128  |
| 6 | -5.876409  | -3.531101 | -2.186231 |
| 6 | -5.736475  | -4.086394 | -0.852628 |
| 6 | -5.663457  | 4.189517  | 0.211224  |
| 6 | -5.525259  | 4.014109  | -1.225292 |
| 6 | -5.456779  | -3.737480 | 1.961907  |
| 6 | -5.319855  | -2.865041 | 3.118421  |
| 6 | -5.249692  | 2.304523  | -3.487717 |
| 6 | -5.113378  | 0.970371  | -4.045904 |
| 6 | -5.046690  | -0.252803 | 4.224520  |
| 6 | -4.909465  | 1.182170  | 4.047636  |
| 6 | -4.843840  | -1.851251 | -3.703647 |

|   |           |           |           |
|---|-----------|-----------|-----------|
| 6 | -4.707311 | -3.014529 | -2.850904 |
| 6 | -4.634256 | 3.467934  | 2.357771  |
| 6 | -4.495226 | 4.060401  | 1.044228  |
| 6 | -4.427656 | -4.177514 | -0.257969 |
| 6 | -4.287206 | -4.037085 | 1.174597  |
| 6 | -4.213077 | 3.789228  | -1.784556 |
| 6 | -4.074563 | 2.955103  | -2.954165 |
| 6 | -4.007737 | -2.389245 | 3.490541  |
| 6 | -3.870427 | -1.083236 | 4.088386  |
| 6 | -3.800477 | 0.367652  | -4.134489 |
| 6 | -3.665516 | -1.062128 | -4.004138 |
| 6 | -3.594757 | 1.749646  | 3.830620  |
| 6 | -3.457093 | 2.928713  | 3.011186  |
| 6 | -3.389547 | -3.403573 | -2.386802 |
| 6 | -3.249521 | -4.028275 | -1.094225 |
| 6 | -3.175360 | 4.168197  | 0.450403  |
| 6 | -3.034924 | 4.071846  | -0.983695 |
| 6 | -2.967437 | -3.832454 | 1.743186  |
| 6 | -2.828446 | -3.033292 | 2.939394  |
| 6 | -2.756965 | 2.490482  | -3.346048 |
| 6 | -2.620945 | 1.198416  | -3.984419 |
| 6 | -2.553596 | -0.485805 | 4.201710  |
| 6 | -2.417333 | 0.954316  | 4.115369  |
| 6 | -2.351177 | -1.640174 | -3.814208 |
| 6 | -2.214761 | -2.851506 | -3.027878 |
| 6 | -2.142866 | 3.336764  | 2.563753  |
| 6 | -2.004023 | 4.001437  | 1.280233  |
| 6 | -1.936813 | -4.158138 | -0.504321 |
| 6 | -1.796949 | -4.097669 | 0.940497  |
| 6 | -1.723759 | 3.885681  | -1.558292 |
| 6 | -1.585569 | 3.114902  | -2.781238 |
| 6 | -1.518930 | -2.583907 | 3.344859  |
| 6 | -1.382352 | -1.307439 | 4.023084  |
| 6 | -1.313430 | 0.604070  | -4.112742 |
| 6 | -1.178980 | -0.838952 | -4.067900 |
| 6 | -1.109422 | 1.533746  | 3.934841  |
| 6 | -0.972442 | 2.763989  | 3.181944  |
| 6 | -0.905652 | -3.265706 | -2.586627 |
| 6 | -0.766486 | -3.961974 | -1.325791 |
| 6 | -0.692525 | 4.137656  | 0.692780  |
| 6 | -0.551784 | 4.117456  | -0.745188 |
| 6 | -0.484765 | -3.919412 | 1.516763  |
| 6 | -0.344820 | -3.187692 | 2.754040  |
| 6 | -0.272677 | 2.669577  | -3.192401 |
| 6 | -0.135680 | 1.420995  | -3.902707 |
| 6 | -0.068590 | -0.716750 | 4.162573  |
| 6 | 0.068591  | 0.719864  | 4.162037  |
| 6 | 0.135681  | -1.423922 | -3.901645 |
| 6 | 0.272677  | -2.671973 | -3.190407 |
| 6 | 0.344819  | 3.189753  | 2.751658  |
| 6 | 0.484764  | 3.920546  | 1.513834  |
| 6 | 0.551784  | -4.118017 | -0.742110 |
| 6 | 0.692525  | -4.137138 | 0.695873  |
| 6 | 0.766486  | 3.960975  | -1.328751 |
| 6 | 0.905652  | 3.263763  | -2.589066 |
| 6 | 0.972443  | -2.761606 | 3.184007  |
| 6 | 1.109423  | -1.530801 | 3.935985  |
| 6 | 1.178981  | 0.835902  | -4.068525 |
| 6 | 1.313431  | -0.607153 | -4.112290 |
| 6 | 1.382352  | 1.310450  | 4.022107  |
| 6 | 1.518929  | 2.586411  | 3.342928  |
| 6 | 1.585569  | -3.116990 | -2.778911 |
| 6 | 1.723759  | -3.886853 | -1.555388 |
| 6 | 1.796948  | 4.098371  | 0.937434  |
| 6 | 1.936811  | 4.157755  | -0.507429 |
| 6 | 2.004023  | -4.000478 | 1.283223  |
| 6 | 2.142867  | -3.334843 | 2.566245  |
| 6 | 2.214761  | 2.849232  | -3.030006 |
| 6 | 2.351177  | 1.637313  | -3.815430 |
| 6 | 2.417334  | -0.951235 | 4.116079  |

|   |          |           |           |
|---|----------|-----------|-----------|
| 6 | 2.553596 | 0.488949  | 4.201346  |
| 6 | 2.620946 | -1.201404 | -3.983523 |
| 6 | 2.756965 | -2.492993 | -3.344188 |
| 6 | 2.828444 | 3.035493  | 2.937128  |
| 6 | 2.967435 | 3.833759  | 1.740322  |
| 6 | 3.034924 | -4.072586 | -0.980652 |
| 6 | 3.175361 | -4.167860 | 0.453518  |
| 6 | 3.249519 | 4.027450  | -1.097235 |
| 6 | 3.389547 | 3.401779  | -2.389343 |
| 6 | 3.457095 | -2.926456 | 3.013371  |
| 6 | 3.594759 | -1.746777 | 3.831924  |
| 6 | 3.665517 | 1.059125  | -4.004928 |
| 6 | 3.800478 | -0.370751 | -4.134213 |
| 6 | 3.870427 | 1.086297  | 4.087577  |
| 6 | 4.007735 | 2.391860  | 3.488758  |
| 6 | 4.074563 | -2.957320 | -2.951959 |
| 6 | 4.213077 | -3.790569 | -1.781725 |
| 6 | 4.287203 | 4.037965  | 1.171581  |
| 6 | 4.427654 | 4.177319  | -0.261091 |
| 6 | 4.495227 | -4.059617 | 1.047261  |
| 6 | 4.634259 | -3.466165 | 2.360360  |
| 6 | 4.707311 | 3.012387  | -2.853152 |
| 6 | 4.843841 | 1.848472  | -3.705025 |
| 6 | 4.909467 | -1.179137 | 4.048515  |
| 6 | 5.046690 | 0.255968  | 4.224329  |
| 6 | 5.113378 | -0.973404 | -4.045179 |
| 6 | 5.249692 | -2.307141 | -3.485997 |
| 6 | 5.319852 | 2.867380  | 3.116283  |
| 6 | 5.456775 | 3.738953  | 1.959116  |
| 6 | 5.525259 | -4.015031 | -1.222293 |
| 6 | 5.663457 | -4.189360 | 0.214354  |
| 6 | 5.736473 | 4.085752  | -0.855680 |
| 6 | 5.876409 | 3.529458  | -2.188865 |
| 6 | 5.943086 | -3.084359 | 2.828429  |
| 6 | 6.078197 | -1.946237 | 3.713889  |
| 6 | 6.151371 | 1.282825  | -3.923753 |
| 6 | 6.283839 | -0.142353 | -4.134701 |
| 6 | 6.354322 | 0.858364  | 4.143778  |
| 6 | 6.488874 | 2.193304  | 3.615917  |
| 6 | 6.558255 | -2.791050 | -3.118109 |
| 6 | 6.694579 | -3.682079 | -1.994594 |
| 6 | 6.767312 | 3.961009  | 1.398649  |
| 6 | 6.908617 | 4.171175  | -0.014418 |
| 6 | 6.976893 | -4.097721 | 0.809484  |
| 6 | 7.116561 | -3.576969 | 2.138773  |
| 6 | 7.191477 | 3.152788  | -2.660199 |
| 6 | 7.328362 | 2.048433  | -3.563653 |
| 6 | 7.397289 | -1.384057 | 3.948077  |
| 6 | 7.540698 | 0.021620  | 4.218919  |
| 6 | 7.602713 | -0.749604 | -4.065456 |
| 6 | 7.744664 | -2.105096 | -3.604662 |
| 6 | 7.817203 | 2.689181  | 3.272385  |
| 6 | 7.954284 | 3.625261  | 2.174768  |
| 6 | 8.023909 | -3.938573 | -1.450453 |
| 6 | 8.163059 | -4.191238 | -0.029247 |
| 6 | 8.235913 | 4.120735  | -0.610769 |
| 6 | 8.377926 | 3.639941  | -1.972297 |
| 6 | 8.440246 | -3.232730 | 2.630548  |
| 6 | 8.567975 | -2.146341 | 3.582749  |
| 6 | 8.649805 | 1.504785  | -3.824787 |
| 6 | 8.774398 | 0.091077  | -4.125152 |
| 6 | 8.863439 | 0.625833  | 4.236442  |
| 6 | 8.987449 | 2.044278  | 3.801264  |
| 6 | 9.066129 | -2.639591 | -3.321193 |
| 6 | 9.191581 | -3.645696 | -2.233616 |
| 6 | 9.258511 | 3.944966  | 1.661383  |
| 6 | 9.399625 | 4.242603  | 0.223117  |
| 6 | 9.470058 | -4.193549 | 0.574234  |
| 6 | 9.610978 | -3.726888 | 1.961134  |
| 6 | 9.685189 | 3.335913  | -2.491223 |



|   |            |           |           |
|---|------------|-----------|-----------|
| 6 | 9.823093   | 2.257533  | -3.476646 |
| 6 | 9.871502   | -1.608513 | 3.883808  |
| 6 | 9.988086   | -0.237127 | 4.265765  |
| 6 | 10.077210  | -0.527953 | -4.124427 |
| 6 | 10.192437  | -1.907214 | -3.779830 |
| 6 | 10.255676  | 2.654177  | 3.506543  |
| 6 | 10.386670  | 3.586096  | 2.481555  |
| 6 | 10.464145  | -4.020605 | -1.672698 |
| 6 | 10.598778  | -4.299778 | -0.318809 |
| 6 | 10.681544  | 4.273502  | -0.441015 |
| 6 | 10.818199  | 3.850706  | -1.753875 |
| 6 | 10.901550  | -3.397617 | 2.542839  |
| 6 | 11.029325  | -2.392549 | 3.479789  |
| 6 | 11.113417  | 1.684824  | -3.829294 |
| 6 | 11.237869  | 0.352189  | -4.159788 |
| 1 | -12.231846 | 0.085780  | -4.317224 |
| 1 | -12.015826 | -2.304477 | -3.727560 |
| 1 | -12.025148 | 2.086022  | 3.824786  |
| 1 | -11.803458 | 3.887141  | 2.148258  |
| 1 | -11.823447 | -3.775381 | -2.184642 |
| 1 | -11.581766 | -4.520241 | 0.139917  |
| 1 | -11.603183 | 4.456539  | 0.091525  |
| 1 | -11.366781 | 3.959629  | -2.297551 |
| 1 | -11.390871 | -3.927978 | 2.204795  |
| 1 | -11.161302 | -2.283861 | 4.008227  |
| 1 | -11.201875 | 2.311168  | -3.639253 |
| 1 | -10.998321 | -0.182583 | 4.339618  |
| 1 | 10.998327  | 0.185849  | 4.339453  |
| 1 | 11.201878  | -2.313897 | -3.637514 |
| 1 | 11.161298  | 2.286884  | 4.006532  |
| 1 | 11.390862  | 3.929655  | 2.201874  |
| 1 | 11.366778  | -3.961366 | -2.294603 |
| 1 | 11.603183  | -4.456476 | 0.094848  |
| 1 | 11.581762  | 4.520358  | 0.136544  |
| 1 | 11.823446  | 3.773745  | -2.187454 |
| 1 | 11.803464  | -3.885505 | 2.151136  |
| 1 | 12.025157  | -2.083127 | 3.826308  |
| 1 | 12.015828  | 2.301677  | -3.729259 |
| 1 | 12.231851  | -0.089018 | -4.317136 |

Nanotube (7,5) u09v02  
B3LYP/STO-3G Energy: -8296.460098

|   |            |           |           |
|---|------------|-----------|-----------|
| 6 | -11.388421 | -4.018753 | -0.724619 |
| 6 | -11.263451 | -4.043388 | 0.647673  |
| 6 | -11.088851 | 4.070167  | -1.415356 |
| 6 | -10.969341 | 3.421115  | -2.626786 |
| 6 | -10.951439 | -2.596215 | 3.273019  |
| 6 | -10.801889 | -1.437561 | 4.017877  |
| 6 | -10.696955 | 0.882684  | -4.232407 |
| 6 | -10.578074 | -0.498380 | -4.310262 |
| 6 | -10.473392 | 1.560260  | 4.103442  |
| 6 | -10.328414 | 2.788488  | 3.466794  |
| 6 | -10.333847 | -3.081149 | -2.810259 |
| 6 | -10.225187 | -3.770078 | -1.566903 |
| 6 | -10.044101 | 4.263192  | 0.868895  |
| 6 | -9.928157  | 4.245294  | -0.553944 |
| 6 | -9.970309  | -3.863140 | 1.291185  |
| 6 | -9.824632  | -3.189385 | 2.585681  |
| 6 | -9.684224  | 2.927714  | -3.094783 |
| 6 | -9.558034  | 1.705989  | -3.901368 |
| 6 | -9.512289  | -0.801808 | 4.158141  |
| 6 | -9.354866  | 0.662518  | 4.239671  |
| 6 | -9.311951  | -1.151362 | -4.093339 |
| 6 | -9.200538  | -2.461994 | -3.401120 |
| 6 | -9.054630  | 3.216066  | 2.953482  |
| 6 | -8.921688  | 3.999988  | 1.695103  |
| 6 | -8.923561  | -3.944726 | -0.969697 |

|   |           |           |           |
|---|-----------|-----------|-----------|
| 6 | -8.798990 | -4.019352 | 0.473733  |
| 6 | -8.626571 | 4.077568  | -1.151765 |
| 6 | -8.507120 | 3.434729  | -2.446421 |
| 6 | -8.512623 | -2.780656 | 3.012728  |
| 6 | -8.357432 | -1.589614 | 3.826924  |
| 6 | -8.257913 | 1.107462  | -4.055918 |
| 6 | -8.135302 | -0.332690 | -4.176917 |
| 6 | -8.044303 | 1.226333  | 4.063376  |
| 6 | -7.892475 | 2.526211  | 3.440837  |
| 6 | -7.883745 | -2.888429 | -2.958597 |
| 6 | -7.749676 | -3.683674 | -1.767172 |
| 6 | -7.597988 | 4.123034  | 1.106138  |
| 6 | -7.453975 | 4.220681  | -0.321878 |
| 6 | -7.476277 | -3.920658 | 1.065553  |
| 6 | -7.332560 | -3.332939 | 2.364638  |
| 6 | -7.188509 | 3.032198  | -2.905982 |
| 6 | -7.062865 | 1.880238  | -3.750637 |
| 6 | -7.024048 | -1.040817 | 4.028371  |
| 6 | -6.866983 | 0.376636  | 4.188149  |
| 6 | -6.812690 | -0.939530 | -4.069401 |
| 6 | -6.690490 | -2.254804 | -3.497098 |
| 6 | -6.558883 | 2.970184  | 3.049103  |
| 6 | -6.414471 | 3.820969  | 1.895075  |
| 6 | -6.432543 | -3.920550 | -1.198506 |
| 6 | -6.300942 | -4.084189 | 0.232248  |
| 6 | -6.135669 | 4.122660  | -0.925968 |
| 6 | -6.007896 | 3.558392  | -2.252886 |
| 6 | -6.012916 | -2.988468 | 2.849360  |
| 6 | -5.860392 | -1.845242 | 3.729620  |
| 6 | -5.755357 | 1.313516  | -3.993427 |
| 6 | -5.633678 | -0.120567 | -4.194373 |
| 6 | -5.549265 | 0.960769  | 4.117971  |
| 6 | -5.397024 | 2.301058  | 3.572805  |
| 6 | -5.386503 | -2.749671 | -3.125100 |
| 6 | -5.259042 | -3.633747 | -1.979622 |
| 6 | -5.103914 | 4.038568  | 1.333124  |
| 6 | -4.964844 | 4.235523  | -0.099192 |
| 6 | -4.992204 | -4.032605 | 0.834622  |
| 6 | -4.849688 | -3.510267 | 2.178729  |
| 6 | -4.703508 | 3.189562  | -2.743491 |
| 6 | -4.578350 | 2.071797  | -3.655454 |
| 6 | -4.545785 | -1.308956 | 3.971677  |
| 6 | -4.389715 | 0.109957  | 4.205389  |
| 6 | -4.328664 | -0.733935 | -4.123042 |
| 6 | -4.204780 | -2.080410 | -3.617738 |
| 6 | -4.079953 | 2.768233  | 3.208691  |
| 6 | -3.932003 | 3.679664  | 2.099950  |
| 6 | -3.948701 | -3.888437 | -1.420536 |
| 6 | -3.815494 | -4.131675 | -0.005524 |
| 6 | -3.651523 | 4.155770  | -0.703977 |
| 6 | -3.520526 | 3.666891  | -2.054268 |
| 6 | -3.528156 | -3.176254 | 2.673861  |
| 6 | -3.376320 | -2.091105 | 3.611245  |
| 6 | -3.265356 | 1.510427  | -3.913847 |
| 6 | -3.141324 | 0.099414  | -4.190672 |
| 6 | -3.063256 | 0.697409  | 4.154043  |
| 6 | -2.908648 | 2.056300  | 3.689467  |
| 6 | -2.892221 | -2.592922 | -3.269810 |
| 6 | -2.765503 | -3.542032 | -2.185465 |
| 6 | -2.611611 | 3.926291  | 1.550736  |
| 6 | -2.472183 | 4.210952  | 0.137774  |
| 6 | -2.499816 | -4.110463 | 0.601419  |
| 6 | -2.358187 | -3.665306 | 1.974233  |
| 6 | -2.209721 | 3.324137  | -2.565013 |
| 6 | -2.084289 | 2.255887  | -3.539198 |
| 6 | -2.057378 | -1.569467 | 3.889928  |
| 6 | -1.902032 | -0.159899 | 4.205000  |
| 6 | -1.836322 | -0.518974 | -4.161013 |
| 6 | -1.713137 | -1.900046 | -3.730392 |
| 6 | -1.592955 | 2.549008  | 3.359992  |

|   |           |           |           |
|---|-----------|-----------|-----------|
| 6 | -1.444474 | 3.529732  | 2.299466  |
| 6 | -1.460054 | -3.833033 | -1.644825 |
| 6 | -1.328360 | -4.161736 | -0.238411 |
| 6 | -1.164492 | 4.170048  | -0.469138 |
| 6 | -1.033434 | 3.759092  | -1.852832 |
| 6 | -1.045649 | -3.360555 | 2.488506  |
| 6 | -0.895527 | -2.324778 | 3.488200  |
| 6 | -0.779685 | 1.709062  | -3.825599 |
| 6 | -0.655591 | 0.312695  | -4.178222 |
| 6 | -0.584002 | 0.428322  | 4.182824  |
| 6 | -0.428280 | 1.810275  | 3.793102  |
| 6 | -0.406129 | -2.426322 | -3.406807 |
| 6 | -0.279114 | -3.433504 | -2.381033 |
| 6 | -0.127941 | 3.798999  | 1.763621  |
| 6 | 0.013412  | 4.164039  | 0.374981  |
| 6 | -0.013410 | -4.164568 | 0.369086  |
| 6 | 0.127943  | -3.801494 | 1.758242  |
| 6 | 0.279115  | 3.436870  | -2.376170 |
| 6 | 0.406128  | 2.431141  | -3.403369 |
| 6 | 0.428279  | -1.815643 | 3.790536  |
| 6 | 0.584000  | -0.434243 | 4.182214  |
| 6 | 0.655589  | -0.306782 | -4.178662 |
| 6 | 0.779683  | -1.703647 | -3.828015 |
| 6 | 0.895527  | 2.319837  | 3.491488  |
| 6 | 1.045650  | 3.357028  | 2.493261  |
| 6 | 1.033436  | -3.756466 | -1.858152 |
| 6 | 1.164495  | -4.169379 | -0.475040 |
| 6 | 1.328362  | 4.162068  | -0.232520 |
| 6 | 1.460055  | 3.835356  | -1.639398 |
| 6 | 1.444475  | -3.532984 | 2.294467  |
| 6 | 1.592955  | -2.553762 | 3.356381  |
| 6 | 1.713135  | 1.905322  | -3.727701 |
| 6 | 1.836319  | 0.524862  | -4.160276 |
| 6 | 1.902030  | 0.153946  | 4.205225  |
| 6 | 2.057377  | 1.563958  | 3.892148  |
| 6 | 2.084288  | -2.250876 | -3.542390 |
| 6 | 2.209722  | -3.320503 | -2.569717 |
| 6 | 2.358189  | 3.662505  | 1.979419  |
| 6 | 2.499818  | 4.109603  | 0.607236  |
| 6 | 2.472186  | -4.211141 | 0.131813  |
| 6 | 2.611613  | -3.928480 | 1.545177  |
| 6 | 2.765503  | 3.545120  | -2.180451 |
| 6 | 2.892220  | 2.597546  | -3.266138 |
| 6 | 2.908647  | -2.061521 | 3.686556  |
| 6 | 3.063254  | -0.703289 | 4.153056  |
| 6 | 3.141321  | -0.093483 | -4.190812 |
| 6 | 3.265354  | -1.504886 | -3.915984 |
| 6 | 3.376319  | 2.085990  | 3.614204  |
| 6 | 3.528157  | 3.172463  | 2.678356  |
| 6 | 3.520528  | -3.663977 | -2.059457 |
| 6 | 3.651527  | -4.154765 | -0.709859 |
| 6 | 3.815496  | 4.131673  | 0.000324  |
| 6 | 3.948702  | 3.890440  | -1.415032 |
| 6 | 3.932004  | -3.682630 | 2.094741  |
| 6 | 4.079952  | -2.772771 | 3.204772  |
| 6 | 4.204778  | 2.085528  | -3.614795 |
| 6 | 4.328660  | 0.739770  | -4.122005 |
| 6 | 4.389713  | -0.115911 | 4.205235  |
| 6 | 4.545783  | 1.303331  | 3.973530  |
| 6 | 4.578349  | -2.066620 | -3.658387 |
| 6 | 4.703509  | -3.185672 | -2.748005 |
| 6 | 4.849689  | 3.507173  | 2.183696  |
| 6 | 4.992206  | 4.031411  | 0.840328  |
| 6 | 4.964847  | -4.235369 | -0.105186 |
| 6 | 5.103917  | -4.040444 | 1.327407  |
| 6 | 5.259042  | 3.636541  | -1.974479 |
| 6 | 5.386501  | 2.754090  | -3.121209 |
| 6 | 5.397022  | -2.306112 | 3.569551  |
| 6 | 5.549263  | -0.966597 | 4.116616  |
| 6 | 5.633674  | 0.126504  | -4.194206 |

|   |            |           |           |
|---|------------|-----------|-----------|
| 6 | 5.755355   | -1.307861 | -3.995290 |
| 6 | 5.860390   | 1.839959  | 3.732233  |
| 6 | 6.012917   | 2.984425  | 2.853589  |
| 6 | 6.007899   | -3.555191 | -2.257921 |
| 6 | 6.135674   | -4.121333 | -0.931802 |
| 6 | 6.300944   | 4.083844  | 0.238027  |
| 6 | 6.432544   | 3.922234  | -1.192957 |
| 6 | 6.414473   | -3.823639 | 1.889667  |
| 6 | 6.558882   | -2.974493 | 3.044902  |
| 6 | 6.690487   | 2.259752  | -3.493911 |
| 6 | 6.812686   | 0.945291  | -4.068079 |
| 6 | 6.866980   | -0.382565 | 4.187624  |
| 6 | 7.024045   | 1.035112  | 4.029852  |
| 6 | 7.062863   | -1.874924 | -3.753303 |
| 6 | 7.188511   | -3.028074 | -2.910274 |
| 6 | 7.332561   | 3.329578  | 2.369354  |
| 6 | 7.476280   | 3.919131  | 1.071100  |
| 6 | 7.453979   | -4.220204 | -0.327851 |
| 6 | 7.597991   | -4.124582 | 1.100302  |
| 6 | 7.749676   | 3.686163  | -1.761959 |
| 6 | 7.883742   | 2.892612  | -2.954514 |
| 6 | 7.892473   | -2.531077 | 3.437268  |
| 6 | 8.044299   | -1.232084 | 4.061652  |
| 6 | 8.135297   | 0.338605  | -4.176459 |
| 6 | 8.257909   | -1.101716 | -4.057495 |
| 6 | 8.357430   | 1.584192  | 3.829182  |
| 6 | 8.512623   | 2.776380  | 3.016664  |
| 6 | 8.507123   | -3.431248 | -2.451281 |
| 6 | 8.626576   | -4.075912 | -1.157534 |
| 6 | 8.798993   | 4.018657  | 0.479419  |
| 6 | 8.923564   | 3.946077  | -0.964116 |
| 6 | 8.921691   | -4.002368 | 1.689443  |
| 6 | 9.054630   | -3.220238 | 2.948937  |
| 6 | 9.200534   | 2.466805  | -3.397646 |
| 6 | 9.311946   | 1.157158  | -4.091726 |
| 6 | 9.354863   | -0.668521 | 4.238750  |
| 6 | 9.512286   | 0.795919  | 4.159290  |
| 6 | 9.558032   | -1.700457 | -3.903792 |
| 6 | 9.684226   | -2.923316 | -3.098928 |
| 6 | 9.824634   | 3.185706  | 2.590194  |
| 6 | 9.970312   | 3.861286  | 1.296649  |
| 6 | 9.928163   | -4.244474 | -0.559950 |
| 6 | 10.044104  | -4.264392 | 0.862863  |
| 6 | 10.225188  | 3.772275  | -1.561571 |
| 6 | 10.333845  | 3.085116  | -2.805906 |
| 6 | 10.328412  | -2.793392 | 3.462862  |
| 6 | 10.473388  | -1.566069 | 4.101253  |
| 6 | 10.578068  | 0.504486  | -4.309577 |
| 6 | 10.696951  | -0.876685 | -4.233674 |
| 6 | 10.801888  | 1.431866  | 4.019923  |
| 6 | 10.951439  | 2.591568  | 3.276696  |
| 6 | 10.969345  | -3.417366 | -2.631624 |
| 6 | 11.088857  | -4.068123 | -1.421113 |
| 6 | 11.263454  | 4.042436  | 0.653392  |
| 6 | 11.388424  | 4.019746  | -0.718936 |
| 1 | -12.382853 | -4.047453 | -1.191145 |
| 1 | -12.165902 | -4.096590 | 1.270245  |
| 1 | -12.081214 | 4.338288  | -1.027050 |
| 1 | -11.874215 | 3.179079  | -3.199067 |
| 1 | -11.960837 | -2.985068 | 3.088180  |
| 1 | -11.696284 | -0.932879 | 4.405495  |
| 1 | -11.696083 | 1.334313  | -4.277484 |
| 1 | -11.487478 | -1.104606 | -4.412702 |
| 1 | -11.481406 | 1.213049  | 4.363895  |
| 1 | -11.227200 | 3.376847  | 3.240817  |
| 1 | -11.340684 | -2.828237 | -3.166445 |
| 1 | -11.054515 | 4.237840  | 1.297313  |
| 1 | 11.054508  | -4.239656 | 1.291315  |
| 1 | 11.340679  | 2.832714  | -3.162455 |
| 1 | 11.227198  | -3.381431 | 3.236055  |

|   |           |           |           |
|---|-----------|-----------|-----------|
| 1 | 11.481402 | -1.219228 | 4.362202  |
| 1 | 11.487472 | 1.110859  | -4.411161 |
| 1 | 11.696077 | -1.328248 | -4.279395 |
| 1 | 11.696281 | 0.926637  | 4.406830  |
| 1 | 11.960836 | 2.980679  | 3.092405  |
| 1 | 11.874219 | -3.174517 | -3.203562 |
| 1 | 12.081218 | -4.336788 | -1.033189 |
| 1 | 12.165905 | 4.094751  | 1.276038  |
| 1 | 12.382854 | 4.049103  | -1.185422 |

Nanotube (7,5) u09v03  
B3LYP/STO-3G Energy: -8371.757840

|   |           |           |           |
|---|-----------|-----------|-----------|
| 6 | 11.455711 | -3.792368 | 1.707062  |
| 6 | 11.323035 | -4.166113 | 0.387575  |
| 6 | 11.240437 | 4.208554  | 0.308523  |
| 6 | 11.120364 | 3.892435  | 1.645589  |
| 6 | 11.012115 | -3.434646 | -2.519448 |
| 6 | 10.870751 | -2.503450 | -3.535007 |
| 6 | 10.831390 | 1.851441  | 3.846561  |
| 6 | 10.699411 | 0.537895  | 4.275109  |
| 6 | 10.572896 | 0.376728  | -4.382936 |
| 6 | 10.443520 | 1.728067  | -4.081582 |
| 6 | 10.421861 | -2.339669 | 3.485219  |
| 6 | 10.299376 | -3.322397 | 2.460663  |
| 6 | 10.186523 | 3.821337  | -1.946618 |
| 6 | 10.077094 | 4.169270  | -0.566963 |
| 6 | 10.027868 | -4.141319 | -0.277594 |
| 6 | 9.882355  | -3.819533 | -1.700152 |
| 6 | 9.832310  | 3.548370  | 2.226932  |
| 6 | 9.698380  | 2.575262  | 3.318822  |
| 6 | 9.586588  | -1.909653 | -3.829928 |
| 6 | 9.444056  | -0.513816 | -4.282672 |
| 6 | 9.425287  | -0.135303 | 4.235491  |
| 6 | 9.297440  | -1.577648 | 3.901766  |
| 6 | 9.176064  | 2.286993  | -3.691905 |
| 6 | 9.057107  | 3.367807  | -2.675954 |
| 6 | 8.992599  | -3.630180 | 1.931767  |
| 6 | 8.859387  | -4.070436 | 0.555768  |
| 6 | 8.776571  | 4.174591  | 0.056754  |
| 6 | 8.657092  | 3.885629  | 1.473177  |
| 6 | 8.572362  | -3.519057 | -2.214634 |
| 6 | 8.425440  | -2.573918 | -3.306165 |
| 6 | 8.393329  | 2.050405  | 3.624896  |
| 6 | 8.257461  | 0.690261  | 4.110557  |
| 6 | 8.140336  | 0.091031  | -4.254422 |
| 6 | 8.004918  | 1.508735  | -3.984775 |
| 6 | 7.974520  | -2.089002 | 3.586981  |
| 6 | 7.826046  | -3.160878 | 2.638850  |
| 6 | 7.737901  | 3.652187  | -2.135296 |
| 6 | 7.601672  | 4.113149  | -0.779430 |
| 6 | 7.534831  | -4.110967 | -0.038364 |
| 6 | 7.390293  | -3.873193 | -1.443816 |
| 6 | 7.337021  | 3.627678  | 2.023169  |
| 6 | 7.204487  | 2.731824  | 3.134488  |
| 6 | 7.096976  | -2.079563 | -3.637845 |
| 6 | 6.953960  | -0.749074 | -4.154588 |
| 6 | 6.928441  | 0.090340  | 4.164866  |
| 6 | 6.790342  | -1.325421 | 3.948546  |
| 6 | 6.677837  | 2.052814  | -3.716387 |
| 6 | 6.547452  | 3.171050  | -2.818280 |
| 6 | 6.503168  | -3.520373 | 2.152742  |
| 6 | 6.361932  | -4.042276 | 0.812371  |
| 6 | 6.284916  | 4.186453  | -0.167323 |
| 6 | 6.157937  | 3.981625  | 1.259374  |
| 6 | 6.071044  | -3.648627 | -1.997243 |
| 6 | 5.925986  | -2.767713 | -3.140013 |
| 6 | 5.892163  | 2.260139  | 3.517460  |

|   |           |           |           |
|---|-----------|-----------|-----------|
| 6 | 5.757758  | 0.927182  | 4.079437  |
| 6 | 5.642038  | -0.151561 | -4.233899 |
| 6 | 5.506288  | 1.284767  | -4.049898 |
| 6 | 5.479223  | -1.885147 | 3.719672  |
| 6 | 5.336688  | -3.031073 | 2.838468  |
| 6 | 5.241342  | 3.539830  | -2.328044 |
| 6 | 5.111040  | 4.097270  | -0.993133 |
| 6 | 5.050270  | -4.131798 | 0.220182  |
| 6 | 4.905921  | -3.968597 | -1.212702 |
| 6 | 4.852252  | 3.764751  | 1.831092  |
| 6 | 4.721032  | 2.919125  | 2.999519  |
| 6 | 4.615854  | -2.296843 | -3.508938 |
| 6 | 4.473698  | -0.983326 | -4.098686 |
| 6 | 4.446920  | 0.330160  | 4.171708  |
| 6 | 4.307423  | -1.099543 | 4.028410  |
| 6 | 4.196263  | 1.844481  | -3.815376 |
| 6 | 4.062803  | 3.010375  | -2.975582 |
| 6 | 4.021247  | -3.405392 | 2.366413  |
| 6 | 3.877581  | -3.999387 | 1.060578  |
| 6 | 3.800107  | 4.188127  | -0.385149 |
| 6 | 3.670779  | 4.061686  | 1.045287  |
| 6 | 3.585522  | -3.756321 | -1.773202 |
| 6 | 3.440379  | -2.946267 | -2.956559 |
| 6 | 3.404008  | 2.456391  | 3.396008  |
| 6 | 3.268019  | 1.165749  | 4.026086  |
| 6 | 3.153897  | -0.387225 | -4.196712 |
| 6 | 3.015651  | 1.046013  | -4.095693 |
| 6 | 2.987881  | -1.669793 | 3.826695  |
| 6 | 2.845621  | -2.861908 | 3.021338  |
| 6 | 2.747211  | 3.402854  | -2.504280 |
| 6 | 2.616999  | 4.038744  | -1.210867 |
| 6 | 2.558044  | -4.117682 | 0.471556  |
| 6 | 2.413396  | -4.035935 | -0.968050 |
| 6 | 2.358431  | 3.874247  | 1.629492  |
| 6 | 2.227678  | 3.093251  | 2.845072  |
| 6 | 2.124689  | -2.498205 | -3.356895 |
| 6 | 1.982870  | -1.216295 | -4.023729 |
| 6 | 1.956680  | 0.574566  | 4.160679  |
| 6 | 1.818028  | -0.869404 | 4.099597  |
| 6 | 1.705991  | 1.621811  | -3.901655 |
| 6 | 1.572424  | 2.841926  | -3.126068 |
| 6 | 1.534040  | -3.267168 | 2.577092  |
| 6 | 1.390639  | -3.940897 | 1.300393  |
| 6 | 1.311303  | 4.167963  | -0.610933 |
| 6 | 1.182917  | 4.124815  | 0.832494  |
| 6 | 1.101109  | -3.857599 | -1.539716 |
| 6 | 0.956997  | -3.111315 | -2.772107 |
| 6 | 0.919579  | 2.652275  | 3.265856  |
| 6 | 0.784442  | 1.394989  | 3.966876  |
| 6 | 0.671688  | -0.627368 | -4.152523 |
| 6 | 0.532550  | 0.810535  | -4.130522 |
| 6 | 0.505053  | -1.447173 | 3.926351  |
| 6 | 0.362338  | -2.680884 | 3.191452  |
| 6 | 0.261624  | 3.253092  | -2.674042 |
| 6 | 0.130140  | 3.959779  | -1.423026 |
| 6 | 0.072695  | -4.081413 | 0.717269  |
| 6 | -0.072696 | -4.081353 | -0.717607 |
| 6 | -0.130140 | 3.959660  | 1.423355  |
| 6 | -0.261624 | 3.252869  | 2.674313  |
| 6 | -0.362338 | -2.680618 | -3.191674 |
| 6 | -0.505053 | -1.446847 | -3.926470 |
| 6 | -0.532550 | 0.810191  | 4.130590  |
| 6 | -0.671688 | -0.627713 | 4.152471  |
| 6 | -0.784442 | 1.395319  | -3.966760 |
| 6 | -0.919579 | 2.652547  | -3.265635 |
| 6 | -0.956997 | -3.111545 | 2.771849  |
| 6 | -1.101109 | -3.857726 | 1.539396  |
| 6 | -1.182918 | 4.124884  | -0.832151 |
| 6 | -1.311303 | 4.167913  | 0.611280  |
| 6 | -1.390639 | -3.940788 | -1.300719 |

|   |           |           |           |
|---|-----------|-----------|-----------|
| 6 | -1.534040 | -3.266954 | -2.577363 |
| 6 | -1.572424 | 2.841667  | 3.126304  |
| 6 | -1.705991 | 1.621487  | 3.901791  |
| 6 | -1.818028 | -0.869062 | -4.099668 |
| 6 | -1.956680 | 0.574912  | -4.160630 |
| 6 | -1.982870 | -1.216629 | 4.023629  |
| 6 | -2.124689 | -2.498483 | 3.356689  |
| 6 | -2.227678 | 3.093488  | -2.844815 |
| 6 | -2.358430 | 3.874384  | -1.629170 |
| 6 | -2.413396 | -4.036014 | 0.967715  |
| 6 | -2.558044 | -4.117642 | -0.471898 |
| 6 | -2.616999 | 4.038644  | 1.211203  |
| 6 | -2.747212 | 3.402646  | 2.504563  |
| 6 | -2.845621 | -2.861656 | -3.021575 |
| 6 | -2.987881 | -1.669474 | -3.826833 |
| 6 | -3.015651 | 1.045674  | 4.095781  |
| 6 | -3.153896 | -0.387573 | 4.196681  |
| 6 | -3.268018 | 1.166085  | -4.025989 |
| 6 | -3.404008 | 2.456675  | -3.395804 |
| 6 | -3.440378 | -2.946512 | 2.956315  |
| 6 | -3.585522 | -3.756467 | 1.772890  |
| 6 | -3.670779 | 4.061774  | -1.044949 |
| 6 | -3.800107 | 4.188095  | 0.385497  |
| 6 | -3.877582 | -3.999297 | -1.060909 |
| 6 | -4.021248 | -3.405194 | -2.366695 |
| 6 | -4.062803 | 3.010128  | 2.975833  |
| 6 | -4.196264 | 1.844165  | 3.815531  |
| 6 | -4.307423 | -1.099207 | -4.028501 |
| 6 | -4.446919 | 0.330508  | -4.171680 |
| 6 | -4.473698 | -0.983666 | 4.098606  |
| 6 | -4.615854 | -2.297134 | 3.508748  |
| 6 | -4.721031 | 2.919376  | -2.999276 |
| 6 | -4.852252 | 3.764905  | -1.830779 |
| 6 | -4.905921 | -3.968696 | 1.212373  |
| 6 | -5.050270 | -4.131777 | -0.220525 |
| 6 | -5.111041 | 4.097189  | 0.993473  |
| 6 | -5.241343 | 3.539637  | 2.328339  |
| 6 | -5.336688 | -3.030835 | -2.838719 |
| 6 | -5.479223 | -1.884836 | -3.719828 |
| 6 | -5.506288 | 1.284432  | 4.050006  |
| 6 | -5.642038 | -0.151912 | 4.233890  |
| 6 | -5.757757 | 0.927522  | -4.079360 |
| 6 | -5.892162 | 2.260433  | -3.517272 |
| 6 | -5.925986 | -2.767974 | 3.139785  |
| 6 | -6.071044 | -3.648793 | 1.996942  |
| 6 | -6.157937 | 3.981732  | -1.259044 |
| 6 | -6.284917 | 4.186440  | 0.167671  |
| 6 | -6.361932 | -4.042205 | -0.812706 |
| 6 | -6.503168 | -3.520191 | -2.153034 |
| 6 | -6.547453 | 3.170815  | 2.818543  |
| 6 | -6.677837 | 2.052505  | 3.716558  |
| 6 | -6.790342 | -1.325091 | -3.948656 |
| 6 | -6.928440 | 0.090688  | -4.164858 |
| 6 | -6.953960 | -0.749420 | 4.154530  |
| 6 | -7.096975 | -2.079866 | 3.637676  |
| 6 | -7.204486 | 2.732086  | -3.134262 |
| 6 | -7.337021 | 3.627848  | -2.022868 |
| 6 | -7.390293 | -3.873311 | 1.443496  |
| 6 | -7.534831 | -4.110967 | 0.038023  |
| 6 | -7.601673 | 4.113084  | 0.779771  |
| 6 | -7.737902 | 3.652008  | 2.135599  |
| 6 | -7.826046 | -3.160656 | -2.639111 |
| 6 | -7.974519 | -2.088702 | -3.587155 |
| 6 | -8.004918 | 1.508403  | 3.984902  |
| 6 | -8.140336 | 0.090677  | 4.254432  |
| 6 | -8.257460 | 0.690604  | -4.110501 |
| 6 | -8.393328 | 2.050708  | -3.624727 |
| 6 | -8.425439 | -2.574194 | 3.305954  |
| 6 | -8.572362 | -3.519241 | 2.214344  |
| 6 | -8.657092 | 3.885753  | -1.472856 |

|   |            |           |           |
|---|------------|-----------|-----------|
| 6 | -8.776573  | 4.174595  | -0.056408 |
| 6 | -8.859387  | -4.070386 | -0.556105 |
| 6 | -8.992598  | -3.630016 | -1.932067 |
| 6 | -9.057108  | 3.367579  | 2.676231  |
| 6 | -9.176064  | 2.286682  | 3.692093  |
| 6 | -9.297439  | -1.577322 | -3.901898 |
| 6 | -9.425286  | -0.134950 | -4.235503 |
| 6 | -9.444055  | -0.514173 | 4.282631  |
| 6 | -9.586587  | -1.909974 | 3.829774  |
| 6 | -9.698379  | 2.575540  | -3.318611 |
| 6 | -9.832309  | 3.548555  | -2.226640 |
| 6 | -9.882355  | -3.819673 | 1.699836  |
| 6 | -10.027867 | -4.141339 | 0.277251  |
| 6 | -10.077096 | 4.169216  | 0.567307  |
| 6 | -10.186526 | 3.821157  | 1.946929  |
| 6 | -10.299375 | -3.322189 | -2.460938 |
| 6 | -10.421861 | -2.339378 | -3.485415 |
| 6 | -10.443519 | 1.727724  | 4.081718  |
| 6 | -10.572897 | 0.376360  | 4.382958  |
| 6 | -10.699411 | 0.538251  | -4.275068 |
| 6 | -10.831388 | 1.851765  | -3.846418 |
| 6 | -10.870749 | -2.503746 | 3.534804  |
| 6 | -11.012115 | -3.434853 | 2.519162  |
| 6 | -11.120364 | 3.892569  | -1.645269 |
| 6 | -11.240439 | 4.208570  | -0.308176 |
| 6 | -11.323036 | -4.166076 | -0.387920 |
| 6 | -11.455711 | -3.792224 | -1.707376 |
| 1 | 12.452266  | -3.712544 | 2.163308  |
| 1 | 12.221218  | -4.388312 | -0.203030 |
| 1 | 12.233475  | 4.358533  | -0.137696 |
| 1 | 12.025297  | 3.796040  | 2.259413  |
| 1 | 12.018458  | -3.775640 | -2.243885 |
| 1 | 11.767993  | -2.125355 | -4.041926 |
| 1 | 11.835247  | 2.289355  | 3.772319  |
| 1 | 11.603035  | -0.031846 | 4.527869  |
| 1 | 11.576124  | -0.037137 | -4.548493 |
| 1 | 11.349027  | 2.345197  | -4.016537 |
| 1 | 11.433119  | -2.014693 | 3.761910  |
| 1 | 11.194259  | 3.676553  | -2.356585 |
| 1 | -11.194275 | 3.676309  | 2.356878  |
| 1 | -11.433114 | -2.014385 | -3.762084 |
| 1 | -11.349028 | 2.344856  | 4.016713  |
| 1 | -11.576134 | -0.037526 | 4.548459  |
| 1 | -11.603034 | -0.031468 | -4.527880 |
| 1 | -11.835238 | 2.289678  | -3.772165 |
| 1 | -11.767990 | -2.125695 | 4.041755  |
| 1 | -12.018466 | -3.775815 | 2.243560  |
| 1 | -12.025296 | 3.796224  | -2.259102 |
| 1 | -12.233480 | 4.358501  | 0.138058  |
| 1 | -12.221218 | -4.388326 | 0.202668  |
| 1 | -12.452265 | -3.712371 | -2.163617 |

Nanotube (7,5) u09v04  
B3LYP/STO-3G Energy: -8447.055318

|   |            |           |           |
|---|------------|-----------|-----------|
| 6 | -11.578378 | -3.145920 | -2.663269 |
| 6 | -11.458021 | -3.847710 | -1.484159 |
| 6 | -11.308710 | 4.226836  | 0.737242  |
| 6 | -11.180731 | 4.264105  | -0.635048 |
| 6 | -11.161731 | -3.892237 | 1.514644  |
| 6 | -11.020374 | -3.254127 | 2.735270  |
| 6 | -10.891609 | 2.852557  | -3.283990 |
| 6 | -10.767437 | 1.691326  | -4.033024 |
| 6 | -10.706731 | -0.689138 | 4.292315  |
| 6 | -10.564971 | 0.692596  | 4.347033  |
| 6 | -10.519769 | -1.295337 | -4.003447 |
| 6 | -10.412699 | -2.508570 | -3.265235 |
| 6 | -10.275430 | 3.261369  | 2.822061  |



|   |            |           |           |
|---|------------|-----------|-----------|
| 6 | -10.152348 | 3.951316  | 1.579754  |
| 6 | -10.166965 | -4.007173 | -0.828493 |
| 6 | -10.028856 | -4.063626 | 0.628791  |
| 6 | -9.890557  | 4.067369  | -1.278436 |
| 6 | -9.756251  | 3.405778  | -2.581907 |
| 6 | -9.733264  | -2.766922 | 3.178472  |
| 6 | -9.583506  | -1.535180 | 3.973477  |
| 6 | -9.498732  | 1.017346  | -4.160060 |
| 6 | -9.385460  | -0.462951 | -4.205942 |
| 6 | -9.289799  | 1.321044  | 4.120514  |
| 6 | -9.154774  | 2.624879  | 3.416995  |
| 6 | -9.111968  | -2.955313 | -2.827408 |
| 6 | -8.992016  | -3.736086 | -1.610371 |
| 6 | -8.846767  | 4.104805  | 0.985576  |
| 6 | -8.718496  | 4.188578  | -0.456983 |
| 6 | -8.720074  | -3.918183 | 1.209723  |
| 6 | -8.573580  | -3.285972 | 2.508071  |
| 6 | -8.453245  | 2.964110  | -3.005669 |
| 6 | -8.325165  | 1.772062  | -3.822720 |
| 6 | -8.275103  | -0.955438 | 4.108209  |
| 6 | -8.127105  | 0.482964  | 4.211222  |
| 6 | -8.069566  | -1.051182 | -4.026894 |
| 6 | -7.936914  | -2.331935 | -3.384741 |
| 6 | -7.829691  | 3.026511  | 2.975123  |
| 6 | -7.679283  | 3.819060  | 1.784064  |
| 6 | -7.672326  | -3.940662 | -1.040241 |
| 6 | -7.535698  | -4.073105 | 0.379607  |
| 6 | -7.396565  | 4.066861  | -1.047599 |
| 6 | -7.262802  | 3.484657  | -2.350372 |
| 6 | -7.243893  | -2.904805 | 2.961464  |
| 6 | -7.094564  | -1.752751 | 3.802190  |
| 6 | -7.000948  | 1.192507  | -4.021372 |
| 6 | -6.876400  | -0.231941 | -4.174345 |
| 6 | -6.793914  | 1.065238  | 4.098068  |
| 6 | -6.648141  | 2.374540  | 3.518086  |
| 6 | -6.620359  | -2.817137 | -3.000709 |
| 6 | -6.492681  | -3.666569 | -1.839363 |
| 6 | -6.356908  | 4.034124  | 1.218245  |
| 6 | -6.220157  | 4.200916  | -0.211754 |
| 6 | -6.218045  | -4.009826 | 0.978545  |
| 6 | -6.074151  | -3.452989 | 2.309073  |
| 6 | -5.950778  | 3.113248  | -2.834222 |
| 6 | -5.823300  | 1.968196  | -3.718120 |
| 6 | -5.778112  | -1.207579 | 4.038733  |
| 6 | -5.630314  | 0.226204  | 4.230239  |
| 6 | -5.571225  | -0.844935 | -4.090941 |
| 6 | -5.444728  | -2.179902 | -3.533095 |
| 6 | -5.335197  | 2.845195  | 3.146795  |
| 6 | -5.190116  | 3.725343  | 2.000452  |
| 6 | -5.185657  | -3.918326 | -1.283870 |
| 6 | -5.049919  | -4.129255 | 0.143791  |
| 6 | -4.911620  | 4.125260  | -0.812892 |
| 6 | -4.778200  | 3.605870  | -2.158576 |
| 6 | -4.762996  | -3.104635 | 2.792956  |
| 6 | -4.615297  | -1.987506 | 3.700886  |
| 6 | -4.517109  | 1.401825  | -3.954254 |
| 6 | -4.391035  | -0.018378 | -4.182477 |
| 6 | -4.314823  | 0.815383  | 4.155009  |
| 6 | -4.166347  | 2.156662  | 3.643567  |
| 6 | -4.136318  | -2.676234 | -3.167223 |
| 6 | -4.006631  | -3.586469 | -2.056600 |
| 6 | -3.874246  | 3.956438  | 1.443293  |
| 6 | -3.734367  | 4.198755  | 0.029120  |
| 6 | -3.732013  | -4.079283 | 0.746204  |
| 6 | -3.588770  | -3.600652 | 2.097895  |
| 6 | -3.462185  | 3.245976  | -2.652710 |
| 6 | -3.332370  | 2.159509  | -3.591796 |
| 6 | -3.291752  | -1.448296 | 3.954874  |
| 6 | -3.142210  | -0.039269 | 4.226677  |
| 6 | -3.077971  | -0.634721 | -4.127399 |

|   |           |           |           |
|---|-----------|-----------|-----------|
| 6 | -2.951618 | -1.994183 | -3.655244 |
| 6 | -2.844031 | 2.644911  | 3.296112  |
| 6 | -2.698627 | 3.589083  | 2.210302  |
| 6 | -2.691796 | -3.864038 | -1.511023 |
| 6 | -2.556124 | -4.153960 | -0.098576 |
| 6 | -2.418154 | 4.153046  | -0.576332 |
| 6 | -2.283992 | 3.707898  | -1.949609 |
| 6 | -2.271717 | -3.281629 | 2.605786  |
| 6 | -2.125085 | -2.215720 | 3.580088  |
| 6 | -2.024311 | 1.609151  | -3.867179 |
| 6 | -1.898721 | 0.197522  | -4.179963 |
| 6 | -1.826590 | 0.555312  | 4.195430  |
| 6 | -1.678207 | 1.932809  | 3.761084  |
| 6 | -1.646140 | -2.513852 | -3.324792 |
| 6 | -1.517164 | -3.493284 | -2.262507 |
| 6 | -1.387042 | 3.855955  | 1.671347  |
| 6 | -1.246951 | 4.180939  | 0.265036  |
| 6 | -1.246055 | -4.140079 | 0.505825  |
| 6 | -1.104694 | -3.734743 | 1.889100  |
| 6 | -0.976255 | 3.376014  | -2.461975 |
| 6 | -0.846655 | 2.339571  | -3.462569 |
| 6 | -0.810768 | -1.691625 | 3.862987  |
| 6 | -0.661239 | -0.297819 | 4.213845  |
| 6 | -0.592655 | -0.418968 | -4.156579 |
| 6 | -0.466040 | -1.802153 | -3.763588 |
| 6 | -0.361755 | 2.434908  | 3.438221  |
| 6 | -0.214994 | 3.436641  | 2.410482  |
| 6 | -0.204945 | -3.790901 | -1.728741 |
| 6 | -0.069073 | -4.157221 | -0.340528 |
| 6 | 0.069074  | 4.157216  | -0.340580 |
| 6 | 0.204945  | 3.790879  | -1.728789 |
| 6 | 0.214995  | -3.436611 | 2.410526  |
| 6 | 0.361754  | -2.434865 | 3.438252  |
| 6 | 0.466040  | 1.802105  | -3.763611 |
| 6 | 0.592655  | 0.418914  | -4.156584 |
| 6 | 0.661239  | 0.297872  | 4.213841  |
| 6 | 0.810768  | 1.691673  | 3.862966  |
| 6 | 0.846655  | -2.339615 | -3.462540 |
| 6 | 0.976255  | -3.376045 | -2.461932 |
| 6 | 1.104694  | 3.734765  | 1.889053  |
| 6 | 1.246055  | 4.140084  | 0.505772  |
| 6 | 1.246951  | -4.180936 | 0.265089  |
| 6 | 1.387043  | -3.855934 | 1.671396  |
| 6 | 1.517164  | 3.493254  | -2.262551 |
| 6 | 1.646140  | 2.513809  | -3.324824 |
| 6 | 1.678207  | -1.932763 | 3.761109  |
| 6 | 1.826589  | -0.555260 | 4.195437  |
| 6 | 1.898721  | -0.197576 | -4.179961 |
| 6 | 2.024311  | -1.609200 | -3.867159 |
| 6 | 2.125085  | 2.215765  | 3.580060  |
| 6 | 2.271717  | 3.281661  | 2.605745  |
| 6 | 2.283992  | -3.707922 | -1.949562 |
| 6 | 2.418155  | -4.153053 | -0.576279 |
| 6 | 2.556124  | 4.153957  | -0.098629 |
| 6 | 2.691796  | 3.864017  | -1.511071 |
| 6 | 2.698628  | -3.589056 | 2.210348  |
| 6 | 2.844032  | -2.644870 | 3.296146  |
| 6 | 2.951618  | 1.994136  | -3.655270 |
| 6 | 3.077971  | 0.634668  | -4.127408 |
| 6 | 3.142209  | 0.039321  | 4.226678  |
| 6 | 3.291752  | 1.448345  | 3.954858  |
| 6 | 3.332369  | -2.159555 | -3.591769 |
| 6 | 3.462186  | -3.246009 | -2.652669 |
| 6 | 3.588770  | 3.600677  | 2.097850  |
| 6 | 3.732013  | 4.079291  | 0.746153  |
| 6 | 3.734368  | -4.198754 | 0.029173  |
| 6 | 3.874247  | -3.956419 | 1.443343  |
| 6 | 4.006631  | 3.586441  | -2.056646 |
| 6 | 4.136318  | 2.676193  | -3.167257 |
| 6 | 4.166347  | -2.156616 | 3.643595  |

|   |           |           |           |
|---|-----------|-----------|-----------|
| 6 | 4.314822  | -0.815331 | 4.155021  |
| 6 | 4.391035  | 0.018325  | -4.182478 |
| 6 | 4.517109  | -1.401875 | -3.954238 |
| 6 | 4.615297  | 1.987552  | 3.700862  |
| 6 | 4.762995  | 3.104669  | 2.792918  |
| 6 | 4.778201  | -3.605896 | -2.158531 |
| 6 | 4.911621  | -4.125269 | -0.812840 |
| 6 | 5.049919  | 4.129254  | 0.143739  |
| 6 | 5.185657  | 3.918307  | -1.283919 |
| 6 | 5.190117  | -3.725317 | 2.000499  |
| 6 | 5.335198  | -2.845154 | 3.146833  |
| 6 | 5.444728  | 2.179856  | -3.533123 |
| 6 | 5.571225  | 0.844883  | -4.090954 |
| 6 | 5.630313  | -0.226150 | 4.230245  |
| 6 | 5.778112  | 1.207630  | 4.038721  |
| 6 | 5.823300  | -1.968242 | -3.718097 |
| 6 | 5.950778  | -3.113283 | -2.834183 |
| 6 | 6.074151  | 3.453017  | 2.309030  |
| 6 | 6.218045  | 4.009835  | 0.978495  |
| 6 | 6.220158  | -4.200916 | -0.211700 |
| 6 | 6.356909  | -4.034106 | 1.218296  |
| 6 | 6.492681  | 3.666543  | -1.839409 |
| 6 | 6.620359  | 2.817098  | -3.000745 |
| 6 | 6.648142  | -2.374495 | 3.518118  |
| 6 | 6.793913  | -1.065186 | 4.098085  |
| 6 | 6.876400  | 0.231889  | -4.174351 |
| 6 | 7.000947  | -1.192558 | -4.021359 |
| 6 | 7.094563  | 1.752799  | 3.802171  |
| 6 | 7.243892  | 2.904842  | 2.961429  |
| 6 | 7.262803  | -3.484685 | -2.350328 |
| 6 | 7.396566  | -4.066872 | -1.047547 |
| 6 | 7.535697  | 4.073106  | 0.379556  |
| 6 | 7.672326  | 3.940646  | -1.040291 |
| 6 | 7.679284  | -3.819034 | 1.784113  |
| 6 | 7.829692  | -3.026471 | 2.975162  |
| 6 | 7.936913  | 2.331892  | -3.384772 |
| 6 | 8.069565  | 1.051131  | -4.026911 |
| 6 | 8.127105  | -0.482910 | 4.211233  |
| 6 | 8.275102  | 0.955490  | 4.108201  |
| 6 | 8.325165  | -1.772110 | -3.822700 |
| 6 | 8.453245  | -2.964146 | -3.005634 |
| 6 | 8.573579  | 3.286002  | 2.508031  |
| 6 | 8.720074  | 3.918195  | 1.209674  |
| 6 | 8.718497  | -4.188579 | -0.456930 |
| 6 | 8.846769  | -4.104787 | 0.985628  |
| 6 | 8.992016  | 3.736063  | -1.610418 |
| 6 | 9.111967  | 2.955276  | -2.827447 |
| 6 | 9.154775  | -2.624833 | 3.417030  |
| 6 | 9.289799  | -1.320990 | 4.120536  |
| 6 | 9.385459  | 0.462899  | -4.205952 |
| 6 | 9.498731  | -1.017398 | -4.160051 |
| 6 | 9.583506  | 1.535231  | 3.973462  |
| 6 | 9.733264  | 2.766962  | 3.178440  |
| 6 | 9.756252  | -3.405808 | -2.581866 |
| 6 | 9.890558  | -4.067380 | -1.278385 |
| 6 | 10.028856 | 4.063630  | 0.628740  |
| 6 | 10.166965 | 4.007158  | -0.828543 |
| 6 | 10.152350 | -3.951289 | 1.579803  |
| 6 | 10.275432 | -3.261325 | 2.822100  |
| 6 | 10.412698 | 2.508528  | -3.265269 |
| 6 | 10.519768 | 1.295288  | -4.003470 |
| 6 | 10.564970 | -0.692540 | 4.347046  |
| 6 | 10.706730 | 0.689194  | 4.292311  |
| 6 | 10.767436 | -1.691378 | -4.033009 |
| 6 | 10.891609 | -2.852598 | -3.283958 |
| 6 | 11.020374 | 3.254160  | 2.735231  |
| 6 | 11.161731 | 3.892253  | 1.514596  |
| 6 | 11.180732 | -4.264105 | -0.634995 |
| 6 | 11.308711 | -4.226817 | 0.737295  |
| 6 | 11.458021 | 3.847686  | -1.484207 |

|   |            |           |           |
|---|------------|-----------|-----------|
| 6 | 11.578378  | 3.145884  | -2.663309 |
| 1 | -12.570811 | -2.942588 | -3.088943 |
| 1 | -12.361876 | -4.206685 | -0.975192 |
| 1 | -12.303681 | 4.267910  | 1.201815  |
| 1 | -12.081261 | 4.339039  | -1.258190 |
| 1 | -12.168268 | -4.143191 | 1.156373  |
| 1 | -11.917862 | -3.011316 | 3.318744  |
| 1 | -11.891803 | 3.268100  | -3.106689 |
| 1 | -11.673510 | 1.214572  | -4.428962 |
| 1 | -11.713850 | -1.122557 | 4.342378  |
| 1 | -11.465014 | 1.314463  | 4.437782  |
| 1 | -11.526094 | -0.900356 | -4.193201 |
| 1 | -11.287440 | 3.025805  | 3.175865  |
| 1 | 11.287448  | -3.025749 | 3.175900  |
| 1 | 11.526088  | 0.900306  | -4.193219 |
| 1 | 11.465014  | -1.314405 | 4.437801  |
| 1 | 11.713849  | 1.122613  | 4.342369  |
| 1 | 11.673508  | -1.214631 | -4.428956 |
| 1 | 11.891803  | -3.268140 | -3.106653 |
| 1 | 11.917862  | 3.011357  | 3.318707  |
| 1 | 12.168268  | 4.143202  | 1.156321  |
| 1 | 12.081263  | -4.339044 | -1.258136 |
| 1 | 12.303684  | -4.267882 | 1.201867  |
| 1 | 12.361877  | 4.206665  | -0.975244 |
| 1 | 12.570811  | 2.942544  | -3.088980 |

Nanotube (7,5) u09v05  
B3LYP/STO-3G Energy: -8522.352500

|   |            |           |           |
|---|------------|-----------|-----------|
| 6 | -11.688356 | -2.423901 | -3.320418 |
| 6 | -11.553435 | -3.403003 | -2.361549 |
| 6 | -11.432107 | 3.829105  | 1.854105  |
| 6 | -11.316177 | 4.218344  | 0.536925  |
| 6 | -11.229730 | -4.212818 | 0.523549  |
| 6 | -11.080838 | -3.908871 | 1.865657  |
| 6 | -11.041499 | 3.537228  | -2.387580 |
| 6 | -10.916923 | 2.608851  | -3.410462 |
| 6 | -10.768268 | -1.827922 | 4.027152  |
| 6 | -10.634408 | -0.505886 | 4.433625  |
| 6 | -10.652124 | -0.283379 | -4.148657 |
| 6 | -10.531525 | -1.643763 | -3.747077 |
| 6 | -10.374606 | 2.369669  | 3.614346  |
| 6 | -10.266591 | 3.355418  | 2.589970  |
| 6 | -10.255231 | -3.714676 | -1.777450 |
| 6 | -10.103611 | -4.141711 | -0.385229 |
| 6 | -10.030027 | 4.203483  | -0.144453 |
| 6 | -9.902941  | 3.900334  | -1.574330 |
| 6 | -9.792082  | -3.541345 | 2.409894  |
| 6 | -9.642399  | -2.554632 | 3.493232  |
| 6 | -9.644928  | 1.999753  | -3.714864 |
| 6 | -9.523785  | 0.582166  | -4.139551 |
| 6 | -9.364652  | 0.170310  | 4.366345  |
| 6 | -9.244237  | 1.611404  | 4.019299  |
| 6 | -9.224174  | -2.177934 | -3.448163 |
| 6 | -9.088896  | -3.243584 | -2.472724 |
| 6 | -8.966954  | 3.667416  | 2.046348  |
| 6 | -8.851622  | 4.119664  | 0.672723  |
| 6 | -8.790364  | -4.140602 | 0.204156  |
| 6 | -8.635569  | -3.861917 | 1.620420  |
| 6 | -8.600990  | 3.593146  | -2.106590 |
| 6 | -8.473008  | 2.651892  | -3.203512 |
| 6 | -8.336347  | -2.018538 | 3.763328  |
| 6 | -8.196270  | -0.653408 | 4.231188  |
| 6 | -8.203363  | -0.022144 | -4.127070 |
| 6 | -8.057924  | -1.423659 | -3.835618 |
| 6 | -7.926020  | 2.124069  | 3.686204  |
| 6 | -7.791070  | 3.196468  | 2.736869  |
| 6 | -7.763295  | -3.577095 | -1.983598 |

|   |           |           |           |
|---|-----------|-----------|-----------|
| 6 | -7.613022 | -4.067763 | -0.646402 |
| 6 | -7.534364 | 4.164092  | 0.061529  |
| 6 | -7.408225 | 3.936811  | -1.347595 |
| 6 | -7.304199 | -3.598753 | 2.146620  |
| 6 | -7.154001 | -2.700346 | 3.253548  |
| 6 | -7.147248 | 2.152624  | -3.552863 |
| 6 | -7.015957 | 0.816850  | -4.067134 |
| 6 | -6.867811 | -0.050445 | 4.260935  |
| 6 | -6.735491 | 1.364163  | 4.035332  |
| 6 | -6.735059 | -1.980862 | -3.597970 |
| 6 | -6.592214 | -3.097987 | -2.694592 |
| 6 | -6.474803 | 3.560140  | 2.235749  |
| 6 | -6.351293 | 4.088584  | 0.896099  |
| 6 | -6.289809 | -4.149591 | -0.060671 |
| 6 | -6.136731 | -3.951527 | 1.366331  |
| 6 | -6.097593 | 3.712043  | -1.919524 |
| 6 | -5.970900 | 2.833722  | -3.068223 |
| 6 | -5.837967 | -2.223138 | 3.612413  |
| 6 | -5.697279 | -0.886093 | 4.164751  |
| 6 | -5.706160 | 0.213010  | -4.153374 |
| 6 | -5.567494 | -1.219349 | -3.958136 |
| 6 | -5.428408 | 1.925617  | 3.788511  |
| 6 | -5.299053 | 3.071371  | 2.905401  |
| 6 | -5.278731 | -3.474295 | -2.232126 |
| 6 | -5.128746 | -4.042810 | -0.906985 |
| 6 | -5.047315 | 4.180754  | 0.286739  |
| 6 | -4.922207 | 4.024503  | -1.148192 |
| 6 | -4.823113 | -3.728734 | 1.913862  |
| 6 | -4.673632 | -2.880625 | 3.077235  |
| 6 | -4.663631 | 2.357213  | -3.450968 |
| 6 | -4.531667 | 1.044162  | -4.037580 |
| 6 | -4.386488 | -0.286477 | 4.234398  |
| 6 | -4.251283 | 1.142689  | 4.084011  |
| 6 | -4.253625 | -1.783122 | -3.741610 |
| 6 | -4.109141 | -2.946694 | -2.902665 |
| 6 | -3.990036 | 3.448747  | 2.417293  |
| 6 | -3.863808 | 4.045884  | 1.111345  |
| 6 | -3.806041 | -4.138144 | -0.321571 |
| 6 | -3.652788 | -4.019951 | 1.106033  |
| 6 | -3.608455 | 3.812942  | -1.726704 |
| 6 | -3.480128 | 3.004881  | -2.913389 |
| 6 | -3.351141 | -2.413028 | 3.450524  |
| 6 | -3.207940 | -1.120796 | 4.074133  |
| 6 | -3.214554 | 0.444255  | -4.151306 |
| 6 | -3.076745 | -0.989245 | -4.046198 |
| 6 | -2.935228 | 1.714957  | 3.864062  |
| 6 | -2.805403 | 2.906559  | 3.056752  |
| 6 | -2.787604 | -3.344971 | -2.456060 |
| 6 | -2.637236 | -3.985152 | -1.166672 |
| 6 | -2.552064 | 4.166926  | 0.505322  |
| 6 | -2.426545 | 4.088578  | -0.936110 |
| 6 | -2.331997 | -3.830209 | 1.668642  |
| 6 | -2.182414 | -3.048705 | 2.881644  |
| 6 | -2.170551 | 2.553454  | -3.329460 |
| 6 | -2.039831 | 1.271061  | -3.995828 |
| 6 | -1.895605 | -0.526919 | 4.187620  |
| 6 | -1.760166 | 0.916784  | 4.122695  |
| 6 | -1.765415 | -1.567072 | -3.870913 |
| 6 | -1.621855 | -2.786011 | -3.097314 |
| 6 | -1.499825 | 3.314709  | 2.596026  |
| 6 | -1.373844 | 3.989566  | 1.318561  |
| 6 | -1.321639 | -4.117023 | -0.589019 |
| 6 | -1.169152 | -4.076553 | 0.851197  |
| 6 | -1.120997 | 3.909299  | -1.525072 |
| 6 | -0.993797 | 3.164225  | -2.758831 |
| 6 | -0.868716 | -2.603784 | 3.279526  |
| 6 | -0.724899 | -1.345648 | 3.976877  |
| 6 | -0.730549 | 0.679159  | -4.141162 |
| 6 | -0.593403 | -0.757831 | -4.119721 |
| 6 | -0.450529 | 1.496815  | 3.932042  |

|   |           |           |           |
|---|-----------|-----------|-----------|
| 6 | -0.319524 | 2.730778  | 3.195602  |
| 6 | -0.304099 | -3.201425 | -2.668050 |
| 6 | -0.153408 | -3.908992 | -1.420829 |
| 6 | -0.063356 | 4.131875  | 0.718305  |
| 6 | 0.063361  | 4.131924  | -0.718029 |
| 6 | 0.153401  | -3.909091 | 1.420562  |
| 6 | 0.304094  | -3.201610 | 2.667831  |
| 6 | 0.319528  | 2.730995  | -3.195421 |
| 6 | 0.450533  | 1.497082  | -3.931944 |
| 6 | 0.593403  | -0.758116 | 4.119667  |
| 6 | 0.730549  | 0.678872  | 4.141205  |
| 6 | 0.724898  | -1.345379 | -3.976969 |
| 6 | 0.868713  | -2.603563 | -3.279704 |
| 6 | 0.993800  | 3.164031  | 2.759041  |
| 6 | 1.121001  | 3.909189  | 1.525333  |
| 6 | 1.169146  | -4.076501 | -0.851476 |
| 6 | 1.321632  | -4.117072 | 0.588737  |
| 6 | 1.373848  | 3.989650  | -1.318294 |
| 6 | 1.499829  | 3.314880  | -2.595806 |
| 6 | 1.621852  | -2.786232 | 3.097123  |
| 6 | 1.765413  | -1.567346 | 3.870805  |
| 6 | 1.760168  | 0.917057  | -4.122636 |
| 6 | 1.895606  | -0.526643 | -4.187658 |
| 6 | 2.039833  | 1.270778  | 3.995909  |
| 6 | 2.170553  | 2.553215  | 3.329629  |
| 6 | 2.182411  | -3.048519 | -2.881852 |
| 6 | 2.331993  | -3.830108 | -1.668903 |
| 6 | 2.426549  | 4.088503  | 0.936383  |
| 6 | 2.552067  | 4.166950  | -0.505043 |
| 6 | 2.637231  | -3.985248 | 1.166400  |
| 6 | 2.787600  | -3.345155 | 2.455832  |
| 6 | 2.805406  | 2.906755  | -3.056559 |
| 6 | 2.935231  | 1.715208  | -3.863949 |
| 6 | 3.076744  | -0.989537 | 4.046128  |
| 6 | 3.214554  | 0.443956  | 4.151332  |
| 6 | 3.207940  | -1.120532 | -4.074209 |
| 6 | 3.351141  | -2.412808 | -3.450688 |
| 6 | 3.480130  | 3.004665  | 2.913588  |
| 6 | 3.608455  | 3.812808  | 1.726958  |
| 6 | 3.652785  | -4.019894 | -1.106308 |
| 6 | 3.806038  | -4.138187 | 0.321289  |
| 6 | 3.863809  | 4.045944  | -1.111074 |
| 6 | 3.990037  | 3.448897  | -2.417062 |
| 6 | 4.109139  | -2.946914 | 2.902464  |
| 6 | 4.253624  | -1.783397 | 3.741486  |
| 6 | 4.251286  | 1.142951  | -4.083934 |
| 6 | 4.386491  | -0.286205 | -4.234416 |
| 6 | 4.531667  | 1.043867  | 4.037645  |
| 6 | 4.663629  | 2.356958  | 3.451122  |
| 6 | 4.673632  | -2.880434 | -3.077430 |
| 6 | 4.823113  | -3.728624 | -1.914116 |
| 6 | 4.922205  | 4.024405  | 1.148461  |
| 6 | 5.047314  | 4.180755  | -0.286458 |
| 6 | 5.128746  | -4.042898 | 0.906710  |
| 6 | 5.278731  | -3.474472 | 2.231891  |
| 6 | 5.299054  | 3.071553  | -2.905195 |
| 6 | 5.428410  | 1.925859  | -3.788383 |
| 6 | 5.567494  | -1.219640 | 3.958050  |
| 6 | 5.706159  | 0.212707  | 4.153382  |
| 6 | 5.697282  | -0.885826 | -4.164810 |
| 6 | 5.837970  | -2.222911 | -3.612563 |
| 6 | 5.970897  | 2.833492  | 3.068409  |
| 6 | 6.097588  | 3.711892  | 1.919772  |
| 6 | 6.136733  | -3.951459 | -1.366600 |
| 6 | 6.289811  | -4.149624 | 0.060390  |
| 6 | 6.351289  | 4.088628  | -0.895823 |
| 6 | 6.474800  | 3.560276  | -2.235509 |
| 6 | 6.592216  | -3.098196 | 2.694383  |
| 6 | 6.735061  | -1.981128 | 3.597835  |
| 6 | 6.735494  | 1.364423  | -4.035238 |

|   |            |           |           |
|---|------------|-----------|-----------|
| 6 | 6.867814   | -0.050171 | -4.260937 |
| 6 | 7.015955   | 0.816555  | 4.067182  |
| 6 | 7.147244   | 2.152364  | 3.553002  |
| 6 | 7.154005   | -2.700142 | -3.253730 |
| 6 | 7.304203   | -3.598629 | -2.146865 |
| 6 | 7.408217   | 3.936703  | 1.347859  |
| 6 | 7.534356   | 4.164080  | -0.061247 |
| 6 | 7.613027   | -4.067836 | 0.646127  |
| 6 | 7.763300   | -3.577256 | 1.983359  |
| 6 | 7.791066   | 3.196643  | -2.736651 |
| 6 | 7.926021   | 2.124309  | -3.686056 |
| 6 | 8.057925   | -1.423936 | 3.835521  |
| 6 | 8.203362   | -0.022438 | 4.127063  |
| 6 | 8.196274   | -0.653129 | -4.231225 |
| 6 | 8.336351   | -2.018291 | -3.763460 |
| 6 | 8.473001   | 2.651665  | 3.203688  |
| 6 | 8.600981   | 3.592996  | 2.106832  |
| 6 | 8.635577   | -3.861825 | -1.620681 |
| 6 | 8.790373   | -4.140610 | -0.204436 |
| 6 | 8.851611   | 4.119704  | -0.672443 |
| 6 | 8.966946   | 3.667552  | -2.046098 |
| 6 | 9.088902   | -3.243769 | 2.472509  |
| 6 | 9.224178   | -2.178180 | 3.448016  |
| 6 | 9.244241   | 1.611679  | -4.019180 |
| 6 | 9.364655   | 0.170605  | -4.366319 |
| 6 | 9.523781   | 0.581883  | 4.139587  |
| 6 | 9.644922   | 1.999504  | 3.715001  |
| 6 | 9.642407   | -2.554392 | -3.493395 |
| 6 | 9.792090   | -3.541179 | -2.410127 |
| 6 | 9.902928   | 3.900239  | 1.574598  |
| 6 | 10.030014  | 4.203491  | 0.144739  |
| 6 | 10.103622  | -4.141736 | 0.384951  |
| 6 | 10.255241  | -3.714796 | 1.777198  |
| 6 | 10.266583  | 3.355616  | -2.589743 |
| 6 | 10.374609  | 2.369921  | -3.614170 |
| 6 | 10.531527  | -1.644011 | 3.746960  |
| 6 | 10.652120  | -0.283655 | 4.148640  |
| 6 | 10.634413  | -0.505569 | -4.433622 |
| 6 | 10.768277  | -1.827632 | -4.027245 |
| 6 | 10.916913  | 2.608657  | 3.410660  |
| 6 | 11.041486  | 3.537102  | 2.387837  |
| 6 | 11.080852  | -3.908691 | -1.865907 |
| 6 | 11.229748  | -4.212725 | -0.523822 |
| 6 | 11.316157  | 4.218453  | -0.536647 |
| 6 | 11.432088  | 3.829307  | -1.853858 |
| 6 | 11.553448  | -3.403128 | 2.361296  |
| 6 | 11.688366  | -2.424092 | 3.320230  |
| 1 | -12.685662 | -2.126535 | -3.673489 |
| 1 | -12.450414 | -3.888414 | -1.955652 |
| 1 | -12.423251 | 3.742312  | 2.320891  |
| 1 | -12.222312 | 4.444478  | -0.039943 |
| 1 | -12.238099 | -4.372044 | 0.119970  |
| 1 | -11.974078 | -3.832281 | 2.499081  |
| 1 | -12.042599 | 3.885906  | -2.102553 |
| 1 | -11.823246 | 2.243252  | -3.910412 |
| 1 | -11.772281 | -2.268482 | 3.971779  |
| 1 | -11.537008 | 0.064483  | 4.688663  |
| 1 | -11.662278 | 0.139449  | -4.223789 |
| 1 | -11.381806 | 2.043142  | 3.903415  |
| 1 | 11.381839  | 2.043402  | -3.903240 |
| 1 | 11.662262  | 0.139178  | 4.223812  |
| 1 | 11.537009  | 0.064841  | -4.688591 |
| 1 | 11.772299  | -2.268171 | -3.971883 |
| 1 | 11.823236  | 2.243067  | 3.910613  |
| 1 | 12.042581  | 3.885829  | 2.102836  |
| 1 | 11.974098  | -3.831992 | -2.499313 |
| 1 | 12.238139  | -4.371899 | -0.120239 |
| 1 | 12.222282  | 4.444614  | 0.040225  |
| 1 | 12.423222  | 3.742614  | -2.320663 |
| 1 | 12.450440  | -3.888468 | 1.955337  |

1 12.685676 -2.126708 3.673295

Nanotube (7,5) u09v06  
B3LYP/STO-3G Energy: -8597.649434

|   |            |           |           |
|---|------------|-----------|-----------|
| 6 | -11.767305 | -1.442019 | -3.903883 |
| 6 | -11.645465 | -2.634537 | -3.226667 |
| 6 | -11.543601 | 3.269934  | 2.696616  |
| 6 | -11.413136 | 3.983656  | 1.525015  |
| 6 | -11.352888 | -4.161212 | -0.643829 |
| 6 | -11.216096 | -4.213234 | 0.732134  |
| 6 | -11.110028 | 4.077216  | -1.473970 |
| 6 | -10.977701 | 3.441873  | -2.699202 |
| 6 | -10.917754 | -2.758281 | 3.357788  |
| 6 | -10.783862 | -1.585224 | 4.089691  |
| 6 | -10.714979 | 0.832578  | -4.148609 |
| 6 | -10.603231 | -0.585196 | -4.106567 |
| 6 | -10.507745 | 1.402742  | 4.033689  |
| 6 | -10.386682 | 2.616662  | 3.297134  |
| 6 | -10.353833 | -3.093409 | -2.730555 |
| 6 | -10.217394 | -3.864455 | -1.494388 |
| 6 | -10.119617 | 4.137540  | 0.874343  |
| 6 | -9.978574  | 4.211807  | -0.583385 |
| 6 | -9.930951  | -4.004650 | 1.363708  |
| 6 | -9.788610  | -3.330008 | 2.664500  |
| 6 | -9.704009  | 2.922886  | -3.137453 |
| 6 | -9.583170  | 1.660790  | -3.908943 |
| 6 | -9.510957  | -0.920742 | 4.208128  |
| 6 | -9.383024  | 0.559997  | 4.241945  |
| 6 | -9.300510  | -1.186118 | -3.943233 |
| 6 | -9.178847  | -2.466953 | -3.272329 |
| 6 | -9.080474  | 3.051283  | 2.864040  |
| 6 | -8.949897  | 3.840702  | 1.653762  |
| 6 | -8.909828  | -4.023263 | -0.913407 |
| 6 | -8.767904  | -4.118853 | 0.528344  |
| 6 | -8.672052  | 4.044865  | -1.164838 |
| 6 | -8.535515  | 3.415714  | -2.465526 |
| 6 | -8.483576  | -2.888311 | 3.074431  |
| 6 | -8.343904  | -1.688912 | 3.877341  |
| 6 | -8.265367  | 1.065493  | -4.039599 |
| 6 | -8.127950  | -0.364995 | -4.114745 |
| 6 | -8.060495  | 1.133947  | 4.063228  |
| 6 | -7.913229  | 2.413035  | 3.421457  |
| 6 | -7.859653  | -2.922820 | -2.873927 |
| 6 | -7.724350  | -3.741178 | -1.706431 |
| 6 | -7.626612  | 4.033568  | 1.086619  |
| 6 | -7.486540  | 4.174940  | -0.332077 |
| 6 | -7.441090  | -4.006615 | 1.115822  |
| 6 | -7.298655  | -3.422751 | 2.416851  |
| 6 | -7.207940  | 3.014024  | -2.918293 |
| 6 | -7.075644  | 1.854043  | -3.755499 |
| 6 | -7.014023  | -1.120415 | 4.071078  |
| 6 | -6.875399  | 0.303392  | 4.216182  |
| 6 | -6.809348  | -0.972322 | -4.015515 |
| 6 | -6.679627  | -2.283857 | -3.427951 |
| 6 | -6.590707  | 2.886092  | 3.042250  |
| 6 | -6.452099  | 3.739697  | 1.885013  |
| 6 | -6.406858  | -3.978344 | -1.149766 |
| 6 | -6.266909  | -4.153855 | 0.280741  |
| 6 | -6.170151  | 4.096767  | -0.930531 |
| 6 | -6.033926  | 3.541578  | -2.264042 |
| 6 | -5.984005  | -3.060126 | 2.897058  |
| 6 | -5.844458  | -1.910201 | 3.774082  |
| 6 | -5.766454  | 1.284416  | -3.981390 |
| 6 | -5.634925  | -0.150655 | -4.158466 |
| 6 | -5.563904  | 0.902546  | 4.133490  |
| 6 | -5.422830  | 2.235897  | 3.575386  |
| 6 | -5.371850  | -2.774772 | -3.066787 |



|   |           |           |           |
|---|-----------|-----------|-----------|
| 6 | -5.237125 | -3.665483 | -1.930883 |
| 6 | -5.141636 | 3.979129  | 1.332016  |
| 6 | -5.002075 | 4.195350  | -0.094008 |
| 6 | -4.957817 | -4.086813 | 0.878456  |
| 6 | -4.816711 | -3.565384 | 2.221596  |
| 6 | -4.724354 | 3.171439  | -2.743999 |
| 6 | -4.590512 | 2.051150  | -3.646022 |
| 6 | -4.532794 | -1.355398 | 4.006334  |
| 6 | -4.392159 | 0.064049  | 4.228624  |
| 6 | -4.325654 | -0.758994 | -4.082357 |
| 6 | -4.194120 | -2.100091 | -3.569231 |
| 6 | -4.108441 | 2.719430  | 3.212760  |
| 6 | -3.967559 | 3.631147  | 2.105262  |
| 6 | -3.921083 | -3.915990 | -1.378237 |
| 6 | -3.781228 | -4.168084 | 0.033104  |
| 6 | -3.683381 | 4.131217  | -0.695203 |
| 6 | -3.544729 | 3.652512  | -2.047119 |
| 6 | -3.496491 | -3.215250 | 2.712761  |
| 6 | -3.355094 | -2.126682 | 3.646884  |
| 6 | -3.274250 | 1.491965  | -3.896296 |
| 6 | -3.142645 | 0.079531  | -4.161149 |
| 6 | -3.072187 | 0.666734  | 4.173914  |
| 6 | -2.931340 | 2.024610  | 3.701967  |
| 6 | -2.878474 | -2.607935 | -3.228184 |
| 6 | -2.743344 | -3.558154 | -2.146154 |
| 6 | -2.649034 | 3.897058  | 1.562574  |
| 6 | -2.508626 | 4.189358  | 0.151201  |
| 6 | -2.464755 | -4.135796 | 0.636861  |
| 6 | -2.323873 | -3.690819 | 2.009558  |
| 6 | -2.231364 | 3.314231  | -2.552124 |
| 6 | -2.097509 | 2.244487  | -3.522419 |
| 6 | -2.041395 | -1.588435 | 3.919587  |
| 6 | -1.901298 | -0.177379 | 4.228859  |
| 6 | -1.834548 | -0.532220 | -4.128628 |
| 6 | -1.703699 | -1.910106 | -3.694568 |
| 6 | -1.620046 | 2.531708  | 3.374519  |
| 6 | -1.479695 | 3.512205  | 2.314889  |
| 6 | -1.433722 | -3.843164 | -1.610861 |
| 6 | -1.295054 | -4.173170 | -0.206756 |
| 6 | -1.197611 | 4.160479  | -0.451725 |
| 6 | -1.059033 | 3.753133  | -1.833671 |
| 6 | -1.012478 | -3.369540 | 2.518848  |
| 6 | -0.871305 | -2.331650 | 3.515831  |
| 6 | -0.788837 | 1.701677  | -3.801762 |
| 6 | -0.657213 | 0.306130  | -4.149535 |
| 6 | -0.588647 | 0.425524  | 4.205244  |
| 6 | -0.447563 | 1.807265  | 3.813560  |
| 6 | -0.392631 | -2.431073 | -3.376123 |
| 6 | -0.257379 | -3.436943 | -2.351688 |
| 6 | -0.163661 | 3.797991  | 1.783680  |
| 6 | -0.022048 | 4.164131  | 0.396694  |
| 6 | 0.022050  | -4.164049 | 0.397542  |
| 6 | 0.163662  | -3.797625 | 1.784453  |
| 6 | 0.257379  | 3.436461  | -2.352388 |
| 6 | 0.392631  | 2.430382  | -3.376618 |
| 6 | 0.447562  | -1.806485 | 3.813927  |
| 6 | 0.588646  | -0.424664 | 4.205332  |
| 6 | 0.657211  | -0.306978 | -4.149473 |
| 6 | 0.788836  | -1.702454 | -3.801416 |
| 6 | 0.871304  | 2.332369  | 3.515357  |
| 6 | 1.012479  | 3.370055  | 2.518162  |
| 6 | 1.059033  | -3.753507 | -1.832908 |
| 6 | 1.197611  | -4.160570 | -0.450877 |
| 6 | 1.295055  | 4.173127  | -0.207606 |
| 6 | 1.433723  | 3.842833  | -1.611643 |
| 6 | 1.479695  | -3.511729 | 2.315603  |
| 6 | 1.620046  | -2.531017 | 3.375034  |
| 6 | 1.703698  | 1.909351  | -3.694957 |
| 6 | 1.834547  | 0.531377  | -4.128738 |
| 6 | 1.901297  | 0.178244  | 4.228825  |

|   |          |           |           |
|---|----------|-----------|-----------|
| 6 | 2.041394 | 1.589237  | 3.919265  |
| 6 | 2.097507 | -2.245207 | -3.521964 |
| 6 | 2.231364 | -3.314752 | -2.551450 |
| 6 | 2.323873 | 3.691230  | 2.008806  |
| 6 | 2.464756 | 4.135925  | 0.636019  |
| 6 | 2.508626 | -4.189324 | 0.152054  |
| 6 | 2.649035 | -3.896735 | 1.563367  |
| 6 | 2.743344 | 3.557712  | -2.146878 |
| 6 | 2.878473 | 2.607274  | -3.228715 |
| 6 | 2.931340 | -2.023851 | 3.702379  |
| 6 | 3.072186 | -0.665880 | 4.174051  |
| 6 | 3.142644 | -0.080382 | -4.161135 |
| 6 | 3.274248 | -1.492762 | -3.895996 |
| 6 | 3.355093 | 2.127428  | 3.646453  |
| 6 | 3.496490 | 3.215805  | 2.712108  |
| 6 | 3.544729 | -3.652929 | -2.046377 |
| 6 | 3.683382 | -4.131357 | -0.694362 |
| 6 | 3.781229 | 4.168087  | 0.032255  |
| 6 | 3.921085 | 3.915704  | -1.379034 |
| 6 | 3.967560 | -3.630712 | 2.106001  |
| 6 | 4.108442 | -2.718770 | 3.213313  |
| 6 | 4.194119 | 2.099359  | -3.569660 |
| 6 | 4.325653 | 0.758158  | -4.082515 |
| 6 | 4.392158 | -0.063184 | 4.228640  |
| 6 | 4.532793 | 1.356219  | 4.006063  |
| 6 | 4.590511 | -2.051896 | -3.645611 |
| 6 | 4.724353 | -3.172000 | -2.743356 |
| 6 | 4.816710 | 3.565838  | 2.220872  |
| 6 | 4.957818 | 4.086989  | 0.877624  |
| 6 | 5.002075 | -4.195364 | -0.093155 |
| 6 | 5.141638 | -3.978851 | 1.332825  |
| 6 | 5.237126 | 3.665083  | -1.931628 |
| 6 | 5.371851 | 2.774140  | -3.067352 |
| 6 | 5.422830 | -2.235163 | 3.575841  |
| 6 | 5.563904 | -0.901699 | 4.133676  |
| 6 | 5.634923 | 0.149804  | -4.158503 |
| 6 | 5.766452 | -1.285231 | -3.981137 |
| 6 | 5.844457 | 1.910975  | 3.773699  |
| 6 | 5.984004 | 3.060719  | 2.896439  |
| 6 | 6.033925 | -3.542039 | -2.263325 |
| 6 | 6.170151 | -4.096953 | -0.929699 |
| 6 | 6.266910 | 4.153907  | 0.279895  |
| 6 | 6.406859 | 3.978101  | -1.150575 |
| 6 | 6.452100 | -3.739305 | 1.885772  |
| 6 | 6.590708 | -2.885465 | 3.042836  |
| 6 | 6.679628 | 2.283151  | -3.428417 |
| 6 | 6.809347 | 0.971499  | -4.015719 |
| 6 | 6.875399 | -0.302528 | 4.216247  |
| 6 | 7.014022 | 1.121249  | 4.070857  |
| 6 | 7.075643 | -1.854813 | -3.755131 |
| 6 | 7.207939 | -3.014620 | -2.917686 |
| 6 | 7.298654 | 3.423245  | 2.416158  |
| 6 | 7.441091 | 4.006839  | 1.115008  |
| 6 | 7.486541 | -4.175001 | -0.331229 |
| 6 | 7.626614 | -4.033338 | 1.087438  |
| 6 | 7.724352 | 3.740819  | -1.707191 |
| 6 | 7.859655 | 2.922224  | -2.874522 |
| 6 | 7.913230 | -2.412330 | 3.421947  |
| 6 | 8.060496 | -1.133113 | 4.063461  |
| 6 | 8.127950 | 0.364152  | -4.114829 |
| 6 | 8.265365 | -1.066322 | -4.039395 |
| 6 | 8.343902 | 1.689709  | 3.877008  |
| 6 | 8.483574 | 2.888943  | 3.073851  |
| 6 | 8.535514 | -3.416219 | -2.464836 |
| 6 | 8.672052 | -4.045100 | -1.164018 |
| 6 | 8.767904 | 4.118955  | 0.527508  |
| 6 | 8.909829 | 4.023066  | -0.914224 |
| 6 | 8.949898 | -3.840355 | 1.654540  |
| 6 | 9.080475 | -3.050689 | 2.864657  |
| 6 | 9.178848 | 2.466278  | -3.272832 |

|   |            |           |           |
|---|------------|-----------|-----------|
| 6 | 9.300511   | 1.185308  | -3.943482 |
| 6 | 9.383023   | -0.559126 | 4.242063  |
| 6 | 9.510954   | 0.921606  | 4.207951  |
| 6 | 9.583167   | -1.661592 | -3.908613 |
| 6 | 9.704006   | -2.923529 | -3.136866 |
| 6 | 9.788608   | 3.330556  | 2.663829  |
| 6 | 9.930951   | 4.004924  | 1.362897  |
| 6 | 9.978574   | -4.211919 | -0.582531 |
| 6 | 10.119618  | -4.137349 | 0.875180  |
| 6 | 10.217395  | 3.864136  | -1.495171 |
| 6 | 10.353834  | 3.092838  | -2.731182 |
| 6 | 10.386684  | -2.615978 | 3.297664  |
| 6 | 10.507746  | -1.401911 | 4.033973  |
| 6 | 10.603232  | 0.584351  | -4.106685 |
| 6 | 10.714980  | -0.833431 | -4.148437 |
| 6 | 10.783861  | 1.586067  | 4.089382  |
| 6 | 10.917753  | 2.758974  | 3.357239  |
| 6 | 10.977699  | -3.442428 | -2.698511 |
| 6 | 11.110027  | -4.077515 | -1.473147 |
| 6 | 11.216097  | 4.213376  | 0.731280  |
| 6 | 11.352890  | 4.161067  | -0.644672 |
| 6 | 11.413139  | -3.983329 | 1.525820  |
| 6 | 11.543603  | -3.269369 | 2.697275  |
| 6 | 11.645467  | 2.633865  | -3.227197 |
| 6 | 11.767308  | 1.441211  | -3.904169 |
| 1 | -12.759719 | -1.058398 | -4.178393 |
| 1 | -12.547952 | -3.202744 | -2.966840 |
| 1 | -12.539409 | 3.071914  | 3.116762  |
| 1 | -12.312422 | 4.355832  | 1.017390  |
| 1 | -12.357270 | -4.207069 | -1.083596 |
| 1 | -12.114856 | -4.298074 | 1.356580  |
| 1 | -12.112400 | 4.348717  | -1.118981 |
| 1 | -11.879465 | 3.223357  | -3.285795 |
| 1 | -11.922033 | -3.165685 | 3.184144  |
| 1 | -11.686808 | -1.094555 | 4.475618  |
| 1 | -11.722701 | 1.267049  | -4.122933 |
| 1 | -11.518536 | 1.018376  | 4.221230  |
| 1 | 11.518539  | -1.017504 | 4.221436  |
| 1 | 11.722702  | -1.267894 | -4.122637 |
| 1 | 11.686805  | 1.095477  | 4.475414  |
| 1 | 11.922029  | 3.166344  | 3.183513  |
| 1 | 11.879461  | -3.224038 | -3.285153 |
| 1 | 12.112398  | -4.348952 | -1.118105 |
| 1 | 12.114856  | 4.298347  | 1.355708  |
| 1 | 12.357271  | 4.206835  | -1.084449 |
| 1 | 12.312424  | -4.355607 | 1.018268  |
| 1 | 12.539410  | -3.071265 | 3.117382  |
| 1 | 12.547954  | 3.202125  | -2.967484 |
| 1 | 12.759723  | 1.057531  | -4.178599 |

Nanotube (7,5) u09v07  
B3LYP/STO-3G Energy: -8672.946093

|   |            |           |           |
|---|------------|-----------|-----------|
| 6 | -11.909865 | -0.419380 | -4.061884 |
| 6 | -11.780753 | -1.744827 | -3.714133 |
| 6 | -11.622638 | 2.442833  | 3.526249  |
| 6 | -11.504798 | 3.432922  | 2.575555  |
| 6 | -11.462157 | -3.880338 | -1.610516 |
| 6 | -11.311589 | -4.282528 | -0.295614 |
| 6 | -11.232340 | 4.292125  | -0.302557 |
| 6 | -11.111718 | 3.992843  | -1.650466 |
| 6 | -10.986828 | -3.549335 | 2.612557  |
| 6 | -10.845704 | -2.603571 | 3.619393  |
| 6 | -10.861290 | 1.844659  | -3.723741 |
| 6 | -10.748078 | 0.464721  | -4.048148 |
| 6 | -10.571600 | 0.298820  | 4.329169  |
| 6 | -10.458864 | 1.660746  | 3.927719  |
| 6 | -10.483697 | -2.311498 | -3.363575 |

|   |            |           |           |
|---|------------|-----------|-----------|
| 6 | -10.334861 | -3.372326 | -2.367886 |
| 6 | -10.217763 | 3.752349  | 1.972964  |
| 6 | -10.091695 | 4.197767  | 0.582344  |
| 6 | -10.019684 | -4.239247 | 0.356099  |
| 6 | -9.864262  | -3.920672 | 1.784279  |
| 6 | -9.841508  | 3.608074  | -2.219449 |
| 6 | -9.727172  | 2.587433  | -3.289930 |
| 6 | -9.571280  | -1.987905 | 3.891929  |
| 6 | -9.443632  | -0.565739 | 4.303446  |
| 6 | -9.443139  | -0.154048 | -4.057076 |
| 6 | -9.314226  | -1.563724 | -3.738375 |
| 6 | -9.157184  | 2.196492  | 3.608258  |
| 6 | -9.039753  | 3.270223  | 2.639539  |
| 6 | -9.021414  | -3.671674 | -1.859852 |
| 6 | -8.865086  | -4.133221 | -0.492031 |
| 6 | -8.790881  | 4.190822  | -0.035034 |
| 6 | -8.666852  | 3.916709  | -1.454981 |
| 6 | -8.555192  | -3.595866 | 2.281470  |
| 6 | -8.407541  | -2.642197 | 3.364088  |
| 6 | -8.410575  | 2.050009  | -3.581811 |
| 6 | -8.272969  | 0.687062  | -4.022979 |
| 6 | -8.123672  | 0.039139  | 4.265371  |
| 6 | -7.983987  | 1.440630  | 3.971817  |
| 6 | -7.991265  | -2.102511 | -3.482494 |
| 6 | -7.844277  | -3.192356 | -2.565255 |
| 6 | -7.722837  | 3.606485  | 2.127988  |
| 6 | -7.597444  | 4.107122  | 0.791799  |
| 6 | -7.532736  | -4.171448 | 0.091837  |
| 6 | -7.377176  | -3.940024 | 1.497169  |
| 6 | -7.343736  | 3.648578  | -2.008091 |
| 6 | -7.218622  | 2.742762  | -3.115427 |
| 6 | -7.076017  | -2.137857 | 3.683475  |
| 6 | -6.936431  | -0.799192 | 4.187379  |
| 6 | -6.952879  | 0.078533  | -4.094474 |
| 6 | -6.816673  | -1.338772 | -3.864647 |
| 6 | -6.665588  | 1.999318  | 3.713136  |
| 6 | -6.539669  | 3.121219  | 2.812990  |
| 6 | -6.520832  | -3.560509 | -2.100392 |
| 6 | -6.366614  | -4.096405 | -0.764859 |
| 6 | -6.286710  | 4.189437  | 0.180528  |
| 6 | -6.163239  | 3.995022  | -1.251205 |
| 6 | -6.057156  | -3.708661 | 2.041538  |
| 6 | -5.908660  | -2.821826 | 3.181984  |
| 6 | -5.910747  | 2.254199  | -3.492116 |
| 6 | -5.779893  | 0.913293  | -4.032524 |
| 6 | -5.625550  | -0.194580 | 4.248189  |
| 6 | -5.491257  | 1.237626  | 4.050123  |
| 6 | -5.504899  | -1.902324 | -3.654281 |
| 6 | -5.358882  | -3.054766 | -2.786743 |
| 6 | -5.234939  | 3.499721  | 2.327642  |
| 6 | -5.110302  | 4.075203  | 1.003504  |
| 6 | -5.051620  | -4.182133 | -0.182680 |
| 6 | -4.896911  | -4.021652 | 1.248035  |
| 6 | -4.858290  | 3.765184  | -1.822636 |
| 6 | -4.732318  | 2.913327  | -2.982737 |
| 6 | -4.594971  | -2.341272 | 3.535804  |
| 6 | -4.452560  | -1.025489 | 4.113183  |
| 6 | -4.469777  | 0.309845  | -4.127091 |
| 6 | -4.332646  | -1.117788 | -3.977049 |
| 6 | -4.181434  | 1.802507  | 3.811055  |
| 6 | -4.053051  | 2.969002  | 2.973992  |
| 6 | -4.037826  | -3.435270 | -2.329611 |
| 6 | -3.884078  | -4.040766 | -1.031926 |
| 6 | -3.798229  | 4.172152  | 0.393359  |
| 6 | -3.672595  | 4.055897  | -1.036963 |
| 6 | -3.572107  | -3.804716 | 1.799320  |
| 6 | -3.420961  | -2.990846 | 2.978482  |
| 6 | -3.418120  | 2.440566  | -3.379348 |
| 6 | -3.287848  | 1.144068  | -3.997933 |
| 6 | -3.133412  | -0.424521 | 4.200451  |

|   |           |           |           |
|---|-----------|-----------|-----------|
| 6 | -2.998479 | 1.008599  | 4.092258  |
| 6 | -3.013175 | -1.692285 | -3.789728 |
| 6 | -2.867333 | -2.888279 | -2.990916 |
| 6 | -2.740293 | 3.370156  | 2.504794  |
| 6 | -2.614740 | 4.015511  | 1.215632  |
| 6 | -2.561179 | -4.161200 | -0.452760 |
| 6 | -2.406257 | -4.082108 | 0.985828  |
| 6 | -2.363486 | 3.862468  | -1.624126 |
| 6 | -2.237898 | 3.076686  | -2.835969 |
| 6 | -2.103715 | -2.535957 | 3.366230  |
| 6 | -1.960678 | -1.251082 | 4.024523  |
| 6 | -1.978441 | 0.548440  | -4.135254 |
| 6 | -1.842758 | -0.894322 | -4.071609 |
| 6 | -1.690425 | 1.587683  | 3.893468  |
| 6 | -1.562349 | 2.809010  | 3.121876  |
| 6 | -1.552450 | -3.298938 | -2.560218 |
| 6 | -1.400125 | -3.979310 | -1.289594 |
| 6 | -1.309793 | 4.148524  | 0.613124  |
| 6 | -1.184694 | 4.108698  | -0.828566 |
| 6 | -1.089894 | -3.899132 | 1.547499  |
| 6 | -0.937984 | -3.148662 | 2.774830  |
| 6 | -0.931555 | 2.627688  | -3.256751 |
| 6 | -0.802116 | 1.367388  | -3.950923 |
| 6 | -0.648797 | -0.658182 | 4.142454  |
| 6 | -0.512995 | 0.778832  | 4.118358  |
| 6 | -0.528832 | -1.475963 | -3.910029 |
| 6 | -0.383744 | -2.712146 | -3.181720 |
| 6 | -0.252971 | 3.227721  | 2.669943  |
| 6 | -0.126375 | 3.939533  | 1.422767  |
| 6 | -0.077840 | -4.123021 | -0.716083 |
| 6 | 0.077843  | -4.122964 | 0.716408  |
| 6 | 0.126377  | 3.939418  | -1.423078 |
| 6 | 0.252971  | 3.227507  | -2.670198 |
| 6 | 0.383743  | -2.711891 | 3.181933  |
| 6 | 0.528830  | -1.475650 | 3.910145  |
| 6 | 0.512992  | 0.778503  | -4.118420 |
| 6 | 0.648794  | -0.658512 | -4.142404 |
| 6 | 0.802114  | 1.367703  | 3.950817  |
| 6 | 0.931555  | 2.627949  | 3.256545  |
| 6 | 0.937984  | -3.148884 | -2.774583 |
| 6 | 1.089896  | -3.899255 | -1.547191 |
| 6 | 1.184697  | 4.108762  | 0.828241  |
| 6 | 1.309796  | 4.148472  | -0.613452 |
| 6 | 1.400127  | -3.979203 | 1.289908  |
| 6 | 1.552450  | -3.298730 | 2.560478  |
| 6 | 1.562349  | 2.808759  | -3.122098 |
| 6 | 1.690423  | 1.587372  | -3.893596 |
| 6 | 1.842756  | -0.893997 | 4.071682  |
| 6 | 1.978439  | 0.548770  | 4.135215  |
| 6 | 1.960676  | -1.251403 | -4.024428 |
| 6 | 2.103714  | -2.536226 | -3.366033 |
| 6 | 2.237898  | 3.076912  | 2.835728  |
| 6 | 2.363488  | 3.862595  | 1.623822  |
| 6 | 2.406260  | -4.082182 | -0.985506 |
| 6 | 2.561181  | -4.161158 | 0.453089  |
| 6 | 2.614742  | 4.015408  | -1.215950 |
| 6 | 2.740294  | 3.369952  | -2.505061 |
| 6 | 2.867333  | -2.888037 | 2.991145  |
| 6 | 3.013173  | -1.691981 | 3.789866  |
| 6 | 2.998477  | 1.008273  | -4.092344 |
| 6 | 3.133409  | -0.424856 | -4.200425 |
| 6 | 3.287846  | 1.144387  | 3.997850  |
| 6 | 3.418119  | 2.440836  | 3.379160  |
| 6 | 3.420961  | -2.991082 | -2.978250 |
| 6 | 3.572109  | -3.804854 | -1.799020 |
| 6 | 3.672598  | 4.055973  | 1.036642  |
| 6 | 3.798232  | 4.172112  | -0.393689 |
| 6 | 3.884081  | -4.040675 | 1.032245  |
| 6 | 4.037827  | -3.435078 | 2.329884  |
| 6 | 4.053051  | 2.968761  | -2.974229 |

|   |           |           |           |
|---|-----------|-----------|-----------|
| 6 | 4.181431  | 1.802202  | -3.811204 |
| 6 | 4.332643  | -1.117470 | 3.977145  |
| 6 | 4.469774  | 0.310174  | 4.127076  |
| 6 | 4.452557  | -1.025816 | -4.113112 |
| 6 | 4.594969  | -2.341552 | -3.535626 |
| 6 | 4.732319  | 2.913563  | 2.982511  |
| 6 | 4.858293  | 3.765323  | 1.822340  |
| 6 | 4.896914  | -4.021742 | -1.247718 |
| 6 | 5.051624  | -4.182106 | 0.183011  |
| 6 | 5.110305  | 4.075112  | -1.003826 |
| 6 | 5.234940  | 3.499527  | -2.327920 |
| 6 | 5.358882  | -3.054538 | 2.786987  |
| 6 | 5.504897  | -1.902031 | 3.654439  |
| 6 | 5.491253  | 1.237304  | -4.050233 |
| 6 | 5.625546  | -0.194918 | -4.248188 |
| 6 | 5.779890  | 0.913614  | 4.032465  |
| 6 | 5.910747  | 2.254477  | 3.491947  |
| 6 | 5.908660  | -2.822075 | -3.181768 |
| 6 | 6.057158  | -3.708813 | -2.041246 |
| 6 | 6.163243  | 3.995110  | 1.250889  |
| 6 | 6.286714  | 4.189407  | -0.180860 |
| 6 | 6.366617  | -4.096329 | 0.765182  |
| 6 | 6.520833  | -3.560331 | 2.100675  |
| 6 | 6.539669  | 3.120987  | -2.813241 |
| 6 | 6.665585  | 1.999021  | -3.713305 |
| 6 | 6.816670  | -1.338463 | 3.864765  |
| 6 | 6.952876  | 0.078859  | 4.094484  |
| 6 | 6.936427  | -0.799526 | -4.187334 |
| 6 | 7.076016  | -2.138147 | -3.683318 |
| 6 | 7.218622  | 2.743007  | 3.115218  |
| 6 | 7.343739  | 3.648727  | 2.007805  |
| 6 | 7.377179  | -3.940127 | -1.496858 |
| 6 | 7.532740  | -4.171436 | -0.091507 |
| 6 | 7.597447  | 4.107040  | -0.792125 |
| 6 | 7.722839  | 3.606302  | -2.128276 |
| 6 | 7.844277  | -3.192142 | 2.565512  |
| 6 | 7.991263  | -2.102230 | 3.482672  |
| 6 | 7.983983  | 1.440314  | -3.971950 |
| 6 | 8.123667  | 0.038800  | -4.265398 |
| 6 | 8.272965  | 0.687382  | 4.022946  |
| 6 | 8.410574  | 2.050293  | 3.581664  |
| 6 | 8.407540  | -2.642459 | -3.363890 |
| 6 | 8.555194  | -3.596033 | -2.281189 |
| 6 | 8.666856  | 3.916807  | 1.454672  |
| 6 | 8.790886  | 4.190802  | 0.034701  |
| 6 | 8.865089  | -4.133159 | 0.492358  |
| 6 | 9.021416  | -3.671509 | 1.860145  |
| 6 | 9.039753  | 3.270001  | -2.639804 |
| 6 | 9.157181  | 2.196202  | -3.608450 |
| 6 | 9.314223  | -1.563425 | 3.738518  |
| 6 | 9.443135  | -0.153726 | 4.057114  |
| 6 | 9.443627  | -0.566081 | -4.303430 |
| 6 | 9.571278  | -1.988212 | -3.891792 |
| 6 | 9.727171  | 2.587689  | 3.289739  |
| 6 | 9.841511  | 3.608234  | 2.219166  |
| 6 | 9.864265  | -3.920793 | -1.783971 |
| 6 | 10.019688 | -4.239247 | -0.355763 |
| 6 | 10.091699 | 4.197693  | -0.582679 |
| 6 | 10.217765 | 3.752172  | -1.973266 |
| 6 | 10.334862 | -3.372122 | 2.368159  |
| 6 | 10.483695 | -2.311226 | 3.363776  |
| 6 | 10.458860 | 1.660433  | -3.927877 |
| 6 | 10.571595 | 0.298476  | -4.329225 |
| 6 | 10.748074 | 0.465042  | 4.048143  |
| 6 | 10.861289 | 1.844952  | 3.723620  |
| 6 | 10.845702 | -2.603853 | -3.619203 |
| 6 | 10.986829 | -3.549527 | -2.612283 |
| 6 | 11.111722 | 3.992946  | 1.650148  |
| 6 | 11.232346 | 4.292114  | 0.302214  |
| 6 | 11.311593 | -4.282471 | 0.295952  |

|   |            |           |           |
|---|------------|-----------|-----------|
| 6 | 11.462160  | -3.880183 | 1.610825  |
| 6 | 11.504799  | 3.432700  | -2.575836 |
| 6 | 11.622636  | 2.442545  | -3.526463 |
| 6 | 11.780749  | -1.744531 | 3.714302  |
| 6 | 11.909860  | -0.419059 | 4.061957  |
| 1 | -12.905021 | 0.018738  | -4.220554 |
| 1 | -12.680114 | -2.363889 | -3.601103 |
| 1 | -12.613770 | 2.140853  | 3.892082  |
| 1 | -12.409317 | 3.920490  | 2.189532  |
| 1 | -12.470789 | -3.815235 | -2.038113 |
| 1 | -12.203798 | -4.527732 | 0.294932  |
| 1 | -12.231183 | 4.460842  | 0.119785  |
| 1 | -12.018886 | 3.929713  | -2.265346 |
| 1 | -11.992523 | -3.902223 | 2.350422  |
| 1 | -11.744458 | -2.231483 | 4.128111  |
| 1 | -11.868872 | 2.255021  | -3.577905 |
| 1 | -11.579881 | -0.124297 | 4.421802  |
| 1 | 11.579885  | -0.124653 | -4.421812 |
| 1 | 11.868874  | 2.255301  | 3.577748  |
| 1 | 11.744455  | -2.231810 | -4.127956 |
| 1 | 11.992524  | -3.902392 | -2.350120 |
| 1 | 12.018891  | 3.929860  | 2.265032  |
| 1 | 12.231190  | 4.460789  | -0.120142 |
| 1 | 12.203804  | -4.527713 | -0.294575 |
| 1 | 12.470790  | -3.815044 | 2.038416  |
| 1 | 12.409319  | 3.920292  | -2.189849 |
| 1 | 12.613766  | 2.140538  | -3.892276 |
| 1 | 12.680110  | -2.363604 | 3.601326  |
| 1 | 12.905016  | 0.019069  | 4.220602  |

Nanotube (7,5) u09v08  
B3LYP/STO-3G Energy: -8748.242516

|   |           |           |           |
|---|-----------|-----------|-----------|
| 6 | 11.972022 | -4.128440 | 0.626392  |
| 6 | 11.843679 | -4.124739 | -0.743660 |
| 6 | 11.766581 | 3.945772  | 1.473665  |
| 6 | 11.641819 | 3.276209  | 2.670820  |
| 6 | 11.542678 | -2.621782 | -3.339518 |
| 6 | 11.404733 | -1.449676 | -4.060243 |
| 6 | 11.343400 | 0.710519  | 4.228418  |
| 6 | 11.208711 | -0.667476 | 4.280644  |
| 6 | 11.109949 | 1.552863  | -4.089591 |
| 6 | 10.980288 | 2.768014  | -3.431176 |
| 6 | 10.931979 | -3.216308 | 2.730168  |
| 6 | 10.812212 | -3.878111 | 1.477949  |
| 6 | 10.718543 | 4.192345  | -0.803606 |
| 6 | 10.604744 | 4.148403  | 0.614831  |
| 6 | 10.548872 | -3.913264 | -1.381201 |
| 6 | 10.408285 | -3.215365 | -2.657818 |
| 6 | 10.349391 | 2.785823  | 3.131303  |
| 6 | 10.210873 | 1.554655  | 3.912977  |
| 6 | 10.119038 | -0.795047 | -4.184532 |
| 6 | 9.978358  | 0.668033  | -4.238799 |
| 6 | 9.931358  | -1.302621 | 4.052897  |
| 6 | 9.803636  | -2.595578 | 3.338142  |
| 6 | 9.709188  | 3.200474  | -2.905344 |
| 6 | 9.588125  | 3.959914  | -1.634428 |
| 6 | 9.505590  | -4.029491 | 0.880788  |
| 6 | 9.376931  | -4.075590 | -0.563697 |
| 6 | 9.300963  | 3.987307  | 1.213520  |
| 6 | 9.176631  | 3.321623  | 2.496717  |
| 6 | 9.099329  | -2.786044 | -3.077037 |
| 6 | 8.956088  | -1.577483 | -3.869217 |
| 6 | 8.903940  | 0.969072  | 4.063178  |
| 6 | 8.765245  | -0.472841 | 4.158000  |
| 6 | 8.674758  | 1.244636  | -4.052705 |
| 6 | 8.539337  | 2.535562  | -3.405333 |
| 6 | 8.483186  | -3.000756 | 2.892091  |

|   |          |           |           |
|---|----------|-----------|-----------|
| 6 | 8.337892 | -3.771415 | 1.685202  |
| 6 | 8.269412 | 4.089004  | -1.040103 |
| 6 | 8.129847 | 4.159949  | 0.390145  |
| 6 | 8.055828 | -3.949777 | -1.150289 |
| 6 | 7.916201 | -3.335458 | -2.436211 |
| 6 | 7.855855 | 2.924614  | 2.950821  |
| 6 | 7.718737 | 1.759811  | 3.772701  |
| 6 | 7.629863 | -1.008840 | -4.055080 |
| 6 | 7.488755 | 0.410473  | -4.187339 |
| 6 | 7.436221 | -1.062227 | 4.038393  |
| 6 | 7.297680 | -2.361091 | 3.443136  |
| 6 | 7.212057 | 2.985179  | -2.998809 |
| 6 | 7.079684 | 3.812452  | -1.831905 |
| 6 | 7.015661 | -3.979899 | 1.113558  |
| 6 | 6.878660 | -4.113905 | -0.315166 |
| 6 | 6.809985 | 4.062875  | 0.995491  |
| 6 | 6.677839 | 3.476652  | 2.307594  |
| 6 | 6.596502 | -2.964576 | -2.910536 |
| 6 | 6.454956 | -1.807103 | -3.766395 |
| 6 | 6.401781 | 1.202502  | 4.006925  |
| 6 | 6.263692 | -0.229723 | 4.181641  |
| 6 | 6.174108 | 1.009082  | -4.102728 |
| 6 | 6.038185 | 2.337880  | -3.534388 |
| 6 | 5.984402 | -2.835940 | 3.065556  |
| 6 | 5.844730 | -3.696497 | 1.905375  |
| 6 | 5.770145 | 4.036901  | -1.262757 |
| 6 | 5.636811 | 4.208323  | 0.172735  |
| 6 | 5.567463 | -4.038968 | -0.914409 |
| 6 | 5.428197 | -3.489348 | -2.248725 |
| 6 | 5.369083 | 3.116187  | 2.796549  |
| 6 | 5.233141 | 1.982063  | 3.688587  |
| 6 | 5.145602 | -1.252516 | -3.998750 |
| 6 | 5.005581 | 0.173815  | -4.206313 |
| 6 | 4.952779 | -0.827536 | 4.104810  |
| 6 | 4.813041 | -2.164465 | 3.574396  |
| 6 | 4.729022 | 2.815178  | -3.160326 |
| 6 | 4.594493 | 3.707908  | -2.033130 |
| 6 | 4.532558 | -3.926700 | 1.344870  |
| 6 | 4.393745 | -4.140592 | -0.074667 |
| 6 | 4.326189 | 4.132311  | 0.779141  |
| 6 | 4.192432 | 3.618637  | 2.119361  |
| 6 | 4.111539 | -3.129677 | -2.733446 |
| 6 | 3.970165 | -2.026182 | -3.648028 |
| 6 | 3.915836 | 1.429600  | 3.936906  |
| 6 | 3.776013 | 0.018247  | 4.186769  |
| 6 | 3.687121 | 0.775421  | -4.137313 |
| 6 | 3.548801 | 2.123104  | -3.648421 |
| 6 | 3.493941 | -2.653821 | 3.216524  |
| 6 | 3.353911 | -3.577661 | 2.118673  |
| 6 | 3.277335 | 3.956107  | -1.473954 |
| 6 | 3.143947 | 4.214352  | -0.060753 |
| 6 | 3.074801 | -4.089330 | -0.678552 |
| 6 | 2.934938 | -3.618036 | -2.036990 |
| 6 | 2.875710 | 3.278774  | 2.625718  |
| 6 | 2.739404 | 2.197466  | 3.576601  |
| 6 | 2.652730 | -1.482709 | -3.912683 |
| 6 | 2.512453 | -0.070566 | -4.200947 |
| 6 | 2.460250 | -0.585648 | 4.148740  |
| 6 | 2.320405 | -1.954792 | 3.695201  |
| 6 | 2.235634 | 2.626317  | -3.307178 |
| 6 | 2.100896 | 3.588294  | -2.230414 |
| 6 | 2.040912 | -3.846698 | 1.576281  |
| 6 | 1.902386 | -4.147619 | 0.164509  |
| 6 | 1.834628 | 4.180899  | 0.549254  |
| 6 | 1.701934 | 3.745147  | 1.926197  |
| 6 | 1.623256 | -3.291963 | -2.544868 |
| 6 | 1.483114 | -2.234640 | -3.526157 |
| 6 | 1.429134 | 1.661969  | 3.859313  |
| 6 | 1.290181 | 0.258367  | 4.187002  |
| 6 | 1.202036 | 0.532617  | -4.168903 |



|   |           |           |           |
|---|-----------|-----------|-----------|
| 6 | 1.063402  | 1.911427  | -3.752761 |
| 6 | 1.009022  | -2.462046 | 3.367685  |
| 6 | 0.868814  | -3.449813 | 2.322176  |
| 6 | 0.791365  | 3.864550  | -1.687298 |
| 6 | 0.657935  | 4.204895  | -0.290404 |
| 6 | 0.589187  | -4.123653 | -0.439604 |
| 6 | 0.449439  | -3.731028 | -1.820598 |
| 6 | 0.389643  | 3.426740  | 2.445462  |
| 6 | 0.253194  | 2.403116  | 3.451187  |
| 6 | 0.167283  | -1.703075 | -3.813051 |
| 6 | 0.026358  | -0.316033 | -4.176953 |
| 6 | -0.026365 | -0.346471 | 4.174546  |
| 6 | -0.167290 | -1.730826 | 3.800548  |
| 6 | -0.253197 | 2.428211  | -3.433584 |
| 6 | -0.389642 | 3.444480  | -2.420428 |
| 6 | -0.449438 | -3.744204 | 1.793367  |
| 6 | -0.589183 | -4.126750 | 0.409548  |
| 6 | -0.657929 | 4.202672  | 0.321041  |
| 6 | -0.791363 | 3.852150  | 1.715416  |
| 6 | -0.868814 | -3.432795 | -2.347247 |
| 6 | -1.009025 | -2.437433 | -3.385527 |
| 6 | -1.063408 | 1.884020  | 3.766586  |
| 6 | -1.202044 | 0.502215  | 4.172670  |
| 6 | -1.290188 | 0.288881  | -4.185002 |
| 6 | -1.429140 | 1.690059  | -3.847096 |
| 6 | -1.483119 | -2.260289 | 3.509786  |
| 6 | -1.623256 | -3.310436 | 2.520821  |
| 6 | -1.701931 | 3.759100  | -1.898854 |
| 6 | -1.834622 | 4.184801  | -0.518770 |
| 6 | -1.902382 | -4.146322 | -0.194724 |
| 6 | -2.040910 | -3.835112 | -1.604265 |
| 6 | -2.100894 | 3.571947  | 2.256505  |
| 6 | -2.235637 | 2.602142  | 3.326224  |
| 6 | -2.320409 | -1.927804 | -3.709334 |
| 6 | -2.460256 | -0.555391 | -4.152880 |
| 6 | -2.512462 | -0.101185 | 4.200314  |
| 6 | -2.652736 | -1.511193 | 3.901771  |
| 6 | -2.739406 | 2.223487  | -3.560489 |
| 6 | -2.875707 | 3.297841  | -2.601754 |
| 6 | -2.934936 | -3.632805 | 2.010577  |
| 6 | -3.074796 | -4.094186 | 0.648738  |
| 6 | -3.143940 | 4.213814  | 0.091465  |
| 6 | -3.277330 | 3.945269  | 1.502746  |
| 6 | -3.353909 | -3.562131 | -2.144683 |
| 6 | -3.493943 | -2.630306 | -3.235764 |
| 6 | -3.548805 | 2.096454  | 3.663783  |
| 6 | -3.687129 | 0.745241  | 4.142836  |
| 6 | -3.776018 | 0.048765  | -4.186501 |
| 6 | -3.915838 | 1.458263  | -3.926367 |
| 6 | -3.970170 | -2.052728 | 3.633160  |
| 6 | -4.111539 | -3.149534 | 2.710569  |
| 6 | -4.192426 | 3.634010  | -2.092933 |
| 6 | -4.326180 | 4.137905  | -0.749005 |
| 6 | -4.393739 | -4.141046 | 0.044495  |
| 6 | -4.532553 | -3.916809 | -1.373444 |
| 6 | -4.594489 | 3.693002  | 2.060096  |
| 6 | -4.729025 | 2.792071  | 3.180745  |
| 6 | -4.813042 | -2.138353 | -3.590053 |
| 6 | -4.952783 | -0.797590 | -4.110703 |
| 6 | -5.005590 | 0.143150  | 4.207438  |
| 6 | -5.145607 | -1.281632 | 3.989498  |
| 6 | -5.233141 | 2.008905  | -3.674027 |
| 6 | -5.369079 | 3.136506  | -2.773760 |
| 6 | -5.428195 | -3.505668 | 2.223239  |
| 6 | -5.567458 | -4.045555 | 0.884953  |
| 6 | -5.636802 | 4.209497  | -0.142064 |
| 6 | -5.770138 | 4.027618  | 1.292140  |
| 6 | -5.844725 | -3.682526 | -1.932255 |
| 6 | -5.984401 | -2.813526 | -3.086124 |
| 6 | -6.038190 | 2.312058  | 3.551306  |

|   |            |           |           |
|---|------------|-----------|-----------|
| 6 | -6.174116  | 0.979149  | 4.109940  |
| 6 | -6.263695  | -0.199236 | -4.183161 |
| 6 | -6.401782  | 1.231681  | -3.998029 |
| 6 | -6.454961  | -1.834514 | 3.753107  |
| 6 | -6.596502  | -2.985730 | 2.888851  |
| 6 | -6.677832  | 3.493405  | -2.282195 |
| 6 | -6.809976  | 4.070063  | -0.965858 |
| 6 | -6.878654  | -4.116120 | 0.285182  |
| 6 | -7.015655  | -3.971706 | -1.142527 |
| 6 | -7.079680  | 3.799025  | 1.859631  |
| 6 | -7.212059  | 2.963253  | 3.020463  |
| 6 | -7.297680  | -2.335935 | -3.460223 |
| 6 | -7.436224  | -1.032761 | -4.045986 |
| 6 | -7.488765  | 0.379941  | 4.190171  |
| 6 | -7.629870  | -1.038372 | 4.047591  |
| 6 | -7.718737  | 1.787271  | -3.759748 |
| 6 | -7.855851  | 2.946065  | -2.929420 |
| 6 | -7.916200  | -3.353150 | 2.411838  |
| 6 | -8.055822  | -3.958090 | 1.121479  |
| 6 | -8.129838  | 4.162731  | -0.359825 |
| 6 | -8.269405  | 4.081357  | 1.069866  |
| 6 | -8.337887  | -3.759061 | -1.712633 |
| 6 | -8.483185  | -2.979611 | -2.913866 |
| 6 | -8.539343  | 2.510680  | 3.423684  |
| 6 | -8.674767  | 1.215063  | 4.061618  |
| 6 | -8.765249  | -0.442520 | -4.161285 |
| 6 | -8.903942  | 0.998667  | -4.055969 |
| 6 | -8.956096  | -1.605648 | 3.857589  |
| 6 | -9.099333  | -2.808418 | 3.056641  |
| 6 | -9.176625  | 3.339768  | -2.472443 |
| 6 | -9.300954  | 3.996104  | -1.184439 |
| 6 | -9.376924  | -4.079634 | 0.533984  |
| 6 | -9.505584  | -4.022998 | -0.910125 |
| 6 | -9.588122  | 3.947938  | 1.663226  |
| 6 | -9.709190  | 3.179229  | 2.928559  |
| 6 | -9.803636  | -2.571193 | -3.356949 |
| 6 | -9.931362  | -1.273044 | -4.062237 |
| 6 | -9.978369  | 0.637119  | 4.243497  |
| 6 | -10.119049 | -0.825528 | 4.178580  |
| 6 | -10.210874 | 1.583143  | -3.901507 |
| 6 | -10.349386 | 2.808601  | -3.110909 |
| 6 | -10.408286 | -3.234685 | 2.634309  |
| 6 | -10.548867 | -3.923281 | 1.352649  |
| 6 | -10.604736 | 4.152846  | -0.584596 |
| 6 | -10.718539 | 4.186427  | 0.834123  |
| 6 | -10.812206 | -3.867282 | -1.506165 |
| 6 | -10.931974 | -3.196364 | -2.753527 |
| 6 | -10.980293 | 2.742938  | 3.451202  |
| 6 | -11.109960 | 1.523013  | 4.100726  |
| 6 | -11.208717 | -0.636253 | -4.285330 |
| 6 | -11.343405 | 0.741326  | -4.223066 |
| 6 | -11.404743 | -1.479236 | 4.049524  |
| 6 | -11.542684 | -2.646072 | 3.320297  |
| 6 | -11.641811 | 3.295637  | -2.646879 |
| 6 | -11.766572 | 3.956477  | -1.444889 |
| 6 | -11.843672 | -4.130122 | 0.713585  |
| 6 | -11.972014 | -4.123830 | -0.656457 |
| 1 | 12.966245  | -4.183636 | 1.091117  |
| 1 | 12.742575  | -4.182621 | -1.370982 |
| 1 | 12.760432  | 4.214816  | 1.089787  |
| 1 | 12.543484  | 3.017079  | 3.240699  |
| 1 | 12.546900  | -3.029789 | -3.167999 |
| 1 | 12.302279  | -0.949215 | -4.446054 |
| 1 | 12.346611  | 1.151851  | 4.285232  |
| 1 | 12.109365  | -1.287729 | 4.376214  |
| 1 | 12.112199  | 1.200042  | -4.364616 |
| 1 | 11.884320  | 3.346572  | -3.200895 |
| 1 | 11.941794  | -2.982690 | 3.091323  |
| 1 | 11.726931  | 4.165481  | -1.236341 |
| 1 | -11.726934 | 4.156388  | 1.266652  |

|   |            |           |           |
|---|------------|-----------|-----------|
| 1 | -11.941783 | -2.960143 | -3.112981 |
| 1 | -11.884324 | 3.323159  | 3.225136  |
| 1 | -12.112215 | 1.168189  | 4.373151  |
| 1 | -12.109372 | -1.255795 | -4.385397 |
| 1 | -12.346618 | 1.183060  | -4.276650 |
| 1 | -12.302292 | -0.981593 | 4.438955  |
| 1 | -12.546908 | -3.052816 | 3.145804  |
| 1 | -12.543475 | 3.040665  | -3.218632 |
| 1 | -12.760424 | 4.222726  | -1.059068 |
| 1 | -12.742565 | -4.192583 | 1.340473  |
| 1 | -12.966236 | -4.175649 | -1.121574 |

Nanotube (7,5) u09v09  
B3LYP/STO-3G Energy: -8823.538697

|   |           |           |           |
|---|-----------|-----------|-----------|
| 6 | 12.109714 | 3.741688  | -1.691373 |
| 6 | 11.987004 | 4.095889  | -0.367668 |
| 6 | 11.829559 | -4.276443 | -0.420451 |
| 6 | 11.705004 | -3.939621 | -1.749802 |
| 6 | 11.684275 | 3.321599  | 2.529832  |
| 6 | 11.539722 | 2.377388  | 3.529189  |
| 6 | 11.422637 | -1.861143 | -3.917137 |
| 6 | 11.300228 | -0.542483 | -4.323091 |
| 6 | 11.220119 | -0.513226 | 4.333126  |
| 6 | 11.077145 | -1.855643 | 4.011933  |
| 6 | 11.052966 | 2.323554  | -3.483514 |
| 6 | 10.944075 | 3.288615  | -2.446477 |
| 6 | 10.790383 | -3.911162 | 1.844866  |
| 6 | 10.669949 | -4.236381 | 0.464774  |
| 6 | 10.692769 | 4.069047  | 0.305518  |
| 6 | 10.551646 | 3.728204  | 1.719081  |
| 6 | 10.414553 | -3.571641 | -2.318566 |
| 6 | 10.283571 | -2.583941 | -3.391438 |
| 6 | 10.248777 | 1.788309  | 3.820632  |
| 6 | 10.096225 | 0.390956  | 4.251195  |
| 6 | 10.029191 | 0.142778  | -4.264452 |
| 6 | 9.916135  | 1.577223  | -3.908381 |
| 6 | 9.799348  | -2.397839 | 3.619234  |
| 6 | 9.665567  | -3.459615 | 2.589783  |
| 6 | 9.641015  | 3.602915  | -1.907064 |
| 6 | 9.518656  | 4.024480  | -0.524197 |
| 6 | 9.364473  | -4.223877 | -0.152286 |
| 6 | 9.239868  | -3.913215 | -1.564038 |
| 6 | 9.240784  | 3.434589  | 2.238039  |
| 6 | 9.090945  | 2.473677  | 3.316566  |
| 6 | 8.981199  | -2.044443 | -3.685708 |
| 6 | 8.855204  | -0.674640 | -4.149943 |
| 6 | 8.786987  | -0.202069 | 4.224325  |
| 6 | 8.637689  | -1.615445 | 3.933459  |
| 6 | 8.601452  | 2.097327  | -3.580779 |
| 6 | 8.467943  | 3.156183  | -2.614787 |
| 6 | 8.343239  | -3.726376 | 2.052694  |
| 6 | 8.196024  | -4.165165 | 0.690253  |
| 6 | 8.199218  | 4.067644  | 0.077405  |
| 6 | 8.059778  | 3.809459  | 1.478884  |
| 6 | 7.920826  | -3.634291 | -2.102472 |
| 6 | 7.790475  | -2.721041 | -3.197752 |
| 6 | 7.761114  | 1.984559  | 3.645726  |
| 6 | 7.608887  | 0.649499  | 4.140984  |
| 6 | 7.532341  | -0.061282 | -4.184049 |
| 6 | 7.408009  | 1.348165  | -3.945033 |
| 6 | 7.304901  | -2.142446 | 3.660149  |
| 6 | 7.159721  | -3.242011 | 2.748256  |
| 6 | 7.149906  | 3.518297  | -2.114258 |
| 6 | 7.019758  | 4.019607  | -0.769695 |
| 6 | 6.873975  | -4.215113 | 0.083358  |
| 6 | 6.740607  | -3.988334 | -1.334862 |
| 6 | 6.738649  | 3.585814  | 2.035559  |

|   |           |           |           |
|---|-----------|-----------|-----------|
| 6 | 6.591163  | 2.691687  | 3.162039  |
| 6 | 6.477148  | -2.230052 | -3.565254 |
| 6 | 6.351302  | -0.891422 | -4.104539 |
| 6 | 6.288385  | 0.061524  | 4.217280  |
| 6 | 6.138627  | -1.367159 | 4.013035  |
| 6 | 6.100227  | 1.917677  | -3.701312 |
| 6 | 5.972854  | 3.050472  | -2.803897 |
| 6 | 5.845035  | -3.594261 | 2.260013  |
| 6 | 5.703016  | -4.130702 | 0.918761  |
| 6 | 5.710049  | 4.115135  | -0.169046 |
| 6 | 5.571628  | 3.931856  | 1.262378  |
| 6 | 5.432402  | -3.754235 | -1.897793 |
| 6 | 5.302669  | -2.889173 | -3.053345 |
| 6 | 5.278132  | 2.228676  | 3.533394  |
| 6 | 5.127411  | 0.906155  | 4.104270  |
| 6 | 5.046255  | -0.281285 | -4.183597 |
| 6 | 4.920945  | 1.148984  | -4.017616 |
| 6 | 4.824009  | -1.913161 | 3.779411  |
| 6 | 4.676315  | -3.066249 | 2.922065  |
| 6 | 4.665258  | 3.430945  | -2.320223 |
| 6 | 4.533952  | 4.006487  | -1.004097 |
| 6 | 4.390406  | -4.201699 | 0.316545  |
| 6 | 4.254650  | -4.051703 | -1.110878 |
| 6 | 4.254306  | 3.721993  | 1.826183  |
| 6 | 4.107800  | 2.895101  | 2.996055  |
| 6 | 3.989705  | -2.406882 | -3.433606 |
| 6 | 3.861842  | -1.107612 | -4.041055 |
| 6 | 3.804107  | 0.319423  | 4.196633  |
| 6 | 3.652361  | -1.107082 | 4.074360  |
| 6 | 3.608132  | 1.727206  | -3.796530 |
| 6 | 3.480591  | 2.904490  | -2.975231 |
| 6 | 3.354458  | -3.437775 | 2.449140  |
| 6 | 3.211473  | -4.050882 | 1.151846  |
| 6 | 3.216885  | 4.124781  | -0.405035 |
| 6 | 3.078405  | 4.022900  | 1.028603  |
| 6 | 2.938300  | -3.840513 | -1.684747 |
| 6 | 2.807463  | -3.042599 | -2.882815 |
| 6 | 2.786603  | 2.450656  | 3.395247  |
| 6 | 2.636190  | 1.164155  | 4.041066  |
| 6 | 2.551534  | -0.501368 | -4.158889 |
| 6 | 2.426072  | 0.939036  | -4.076371 |
| 6 | 2.332936  | -1.669624 | 3.879040  |
| 6 | 2.184539  | -2.875630 | 3.088674  |
| 6 | 2.171665  | 3.317380  | -2.518782 |
| 6 | 2.041078  | 3.973815  | -1.232828 |
| 6 | 1.898651  | -4.163261 | 0.557105  |
| 6 | 1.762872  | -4.097497 | -0.885073 |
| 6 | 1.765660  | 3.851577  | 1.606165  |
| 6 | 1.621123  | 3.086941  | 2.828993  |
| 6 | 1.500472  | -2.586015 | -3.292871 |
| 6 | 1.373347  | -1.314992 | -3.975103 |
| 6 | 1.320958  | 0.585634  | 4.171403  |
| 6 | 1.169230  | -0.853069 | 4.128652  |
| 6 | 1.120763  | 1.527173  | -3.890820 |
| 6 | 0.993473  | 2.753218  | -3.135807 |
| 6 | 0.870324  | -3.270861 | 2.639592  |
| 6 | 0.726326  | -3.958405 | 1.377462  |
| 6 | 0.730269  | 4.118734  | -0.640918 |
| 6 | 0.592672  | 4.097677  | 0.795133  |
| 6 | 0.451306  | -3.910665 | -1.465727 |
| 6 | 0.319773  | -3.182438 | -2.703184 |
| 6 | 0.302660  | 2.659869  | 3.246875  |
| 6 | 0.152478  | 1.417359  | 3.960507  |
| 6 | 0.063233  | -0.714672 | -4.119086 |
| 6 | -0.063230 | 0.720528  | -4.118068 |
| 6 | -0.152476 | -1.422989 | 3.958492  |
| 6 | -0.302660 | -2.664485 | 3.243096  |
| 6 | -0.319773 | 3.186281  | -2.698663 |
| 6 | -0.451308 | 3.912747  | -1.460172 |
| 6 | -0.592675 | -4.098803 | 0.789311  |

|   |           |           |           |
|---|-----------|-----------|-----------|
| 6 | -0.730272 | -4.117815 | -0.646768 |
| 6 | -0.726330 | 3.956439  | 1.383082  |
| 6 | -0.870326 | 3.267101  | 2.644233  |
| 6 | -0.993473 | -2.748753 | -3.139713 |
| 6 | -1.120761 | -1.521638 | -3.892985 |
| 6 | -1.169228 | 0.847197  | 4.129860  |
| 6 | -1.320955 | -0.591564 | 4.170571  |
| 6 | -1.373343 | 1.320644  | -3.973236 |
| 6 | -1.500469 | 2.590696  | -3.289200 |
| 6 | -1.621122 | -3.090962 | 2.824609  |
| 6 | -1.765662 | -3.853856 | 1.600694  |
| 6 | -1.762875 | 4.098749  | -0.879253 |
| 6 | -1.898656 | 4.162460  | 0.563017  |
| 6 | -2.041082 | -3.972051 | -1.238471 |
| 6 | -2.171667 | -3.313788 | -2.523490 |
| 6 | -2.184541 | 2.871230  | 3.092753  |
| 6 | -2.332936 | 1.664104  | 3.881408  |
| 6 | -2.426069 | -0.933237 | -4.077704 |
| 6 | -2.551529 | 0.507283  | -4.158180 |
| 6 | -2.636186 | -1.169902 | 4.039417  |
| 6 | -2.786600 | -2.455484 | 3.391770  |
| 6 | -2.807460 | 3.046698  | -2.878498 |
| 6 | -2.938301 | 3.842905  | -1.679295 |
| 6 | -3.078407 | -4.024355 | 1.022890  |
| 6 | -3.216888 | -4.124192 | -0.410892 |
| 6 | -3.211478 | 4.049230  | 1.157595  |
| 6 | -3.354463 | 3.434279  | 2.454017  |
| 6 | -3.480594 | -2.900248 | -2.979351 |
| 6 | -3.608131 | -1.721801 | -3.798981 |
| 6 | -3.652360 | 1.101284  | 4.075932  |
| 6 | -3.804103 | -0.325393 | 4.196185  |
| 6 | -3.861836 | 1.113361  | -4.039490 |
| 6 | -3.989699 | 2.411767  | -3.430198 |
| 6 | -4.107796 | -2.899362 | 2.991950  |
| 6 | -4.254305 | -3.724584 | 1.820900  |
| 6 | -4.254652 | 4.053273  | -1.105127 |
| 6 | -4.390412 | 4.201232  | 0.322508  |
| 6 | -4.533957 | -4.005040 | -1.009783 |
| 6 | -4.665263 | -3.427628 | -2.325089 |
| 6 | -4.676320 | 3.062077  | 2.926411  |
| 6 | -4.824011 | 1.907776  | 3.782125  |
| 6 | -4.920944 | -1.143264 | -4.019250 |
| 6 | -5.046249 | 0.287238  | -4.183208 |
| 6 | -5.127406 | -0.911996 | 4.102996  |
| 6 | -5.278127 | -2.233705 | 3.530242  |
| 6 | -5.302664 | 2.893518  | -3.049256 |
| 6 | -5.432401 | 3.756929  | -1.892471 |
| 6 | -5.571629 | -3.933642 | 1.256799  |
| 6 | -5.710053 | -4.114875 | -0.174885 |
| 6 | -5.703023 | 4.129369  | 0.924618  |
| 6 | -5.845043 | 3.591020  | 2.265105  |
| 6 | -5.972859 | -3.046464 | -2.808220 |
| 6 | -6.100229 | -1.912400 | -3.704033 |
| 6 | -6.138627 | 1.361441  | 4.014979  |
| 6 | -6.288381 | -0.067529 | 4.217206  |
| 6 | -6.351295 | 0.897265  | -4.103294 |
| 6 | -6.477141 | 2.235130  | -3.562110 |
| 6 | -6.591157 | -2.696190 | 3.158235  |
| 6 | -6.738646 | -3.588706 | 2.030478  |
| 6 | -6.740609 | 3.990220  | -1.329210 |
| 6 | -6.873982 | 4.214967  | 0.089333  |
| 6 | -7.019764 | -4.018484 | -0.775394 |
| 6 | -7.149913 | -3.515259 | -2.119242 |
| 6 | -7.159729 | 3.238071  | 2.752845  |
| 6 | -7.304904 | 2.137220  | 3.663186  |
| 6 | -7.408008 | -1.342540 | -3.946950 |
| 6 | -7.532334 | 0.067242  | -4.183982 |
| 6 | -7.608881 | -0.655400 | 4.140087  |
| 6 | -7.761106 | -1.989755 | 3.642936  |
| 6 | -7.790468 | 2.725598  | -3.193919 |

|   |            |           |           |
|---|------------|-----------|-----------|
| 6 | -7.920824  | 3.637278  | -2.097333 |
| 6 | -8.059777  | -3.811553 | 1.473488  |
| 6 | -8.199222  | -4.067727 | 0.071640  |
| 6 | -8.196032  | 4.164142  | 0.696151  |
| 6 | -8.343249  | 3.723412  | 2.057967  |
| 6 | -8.467950  | -3.152427 | -2.619252 |
| 6 | -8.601455  | -2.092208 | -3.583750 |
| 6 | -8.637690  | 1.609830  | 3.935756  |
| 6 | -8.786982  | 0.196046  | 4.224636  |
| 6 | -8.855196  | 0.680556  | -4.149021 |
| 6 | -8.981189  | 2.049700  | -3.682848 |
| 6 | -9.090937  | -2.478408 | 3.313087  |
| 6 | -9.240779  | -3.437774 | 2.233186  |
| 6 | -9.239869  | 3.915427  | -1.558504 |
| 6 | -9.364480  | 4.224055  | -0.146307 |
| 6 | -9.518662  | -4.023694 | -0.529895 |
| 6 | -9.641023  | -3.600154 | -1.912158 |
| 6 | -9.665576  | 3.455883  | 2.594674  |
| 6 | -9.799353  | 2.392659  | 3.622634  |
| 6 | -9.916135  | -1.571637 | -3.910622 |
| 6 | -10.029184 | -0.136694 | -4.264688 |
| 6 | -10.096218 | -0.397022 | 4.250679  |
| 6 | -10.248768 | -1.793763 | 3.818139  |
| 6 | -10.283561 | 2.588782  | -3.387820 |
| 6 | -10.414550 | 3.574938  | -2.313530 |
| 6 | -10.551644 | -3.730643 | 1.713814  |
| 6 | -10.692772 | -4.069445 | 0.299761  |
| 6 | -10.669958 | 4.235664  | 0.470766  |
| 6 | -10.790392 | 3.908478  | 1.850394  |
| 6 | -10.944083 | -3.285076 | -2.451119 |
| 6 | -11.052970 | -2.318553 | -3.486795 |
| 6 | -11.077147 | 1.849906  | 4.014577  |
| 6 | -11.220115 | 0.507040  | 4.333889  |
| 6 | -11.300219 | 0.548655  | -4.322380 |
| 6 | -11.422626 | 1.866739  | -3.914562 |
| 6 | -11.539713 | -2.382434 | 3.525870  |
| 6 | -11.684269 | -3.325210 | 2.525159  |
| 6 | -11.705004 | 3.942089  | -1.744241 |
| 6 | -11.829566 | 4.276988  | -0.414405 |
| 6 | -11.987011 | -4.095304 | -0.373455 |
| 6 | -12.109723 | -3.739206 | -1.696652 |
| 1 | 13.102316  | 3.665517  | -2.156580 |
| 1 | 12.888738  | 4.307638  | 0.221368  |
| 1 | 12.822618  | -4.447724 | 0.017668  |
| 1 | 12.605914  | -3.847608 | -2.370139 |
| 1 | 12.690897  | 3.663282  | 2.257210  |
| 1 | 12.434433  | 1.986383  | 4.030710  |
| 1 | 12.421311  | -2.312592 | -3.860660 |
| 1 | 12.205749  | 0.023062  | -4.578473 |
| 1 | 12.226414  | -0.110464 | 4.505627  |
| 1 | 11.974935  | -2.482932 | 3.937741  |
| 1 | 12.059194  | 1.994543  | -3.773721 |
| 1 | 11.801033  | -3.783181 | 2.253772  |
| 1 | -11.801038 | 3.779924  | 2.259118  |
| 1 | -12.059199 | -1.989130 | -3.776534 |
| 1 | -11.974941 | 2.477294  | 3.941268  |
| 1 | -12.226405 | 0.104033  | 4.505825  |
| 1 | -12.205739 | -0.016523 | -4.578575 |
| 1 | -12.421297 | 2.318113  | -3.857455 |
| 1 | -12.434421 | -1.992156 | 4.027961  |
| 1 | -12.690891 | -3.666508 | 2.252054  |
| 1 | -12.605911 | 3.850967  | -2.364713 |
| 1 | -12.822630 | 4.447627  | 0.023960  |
| 1 | -12.888745 | -4.307882 | 0.215282  |
| 1 | -13.102328 | -3.662354 | -2.161741 |

Nanotube (7,5) u09v10  
B3LYP/STO-3G Energy: -8898.834660

|   |           |           |           |
|---|-----------|-----------|-----------|
| 6 | 12.197881 | -3.256366 | 2.556400  |
| 6 | 12.063824 | -3.937952 | 1.369254  |
| 6 | 11.967717 | 4.166966  | -0.727949 |
| 6 | 11.848751 | 4.184910  | 0.643468  |
| 6 | 11.747552 | -3.934046 | -1.628627 |
| 6 | 11.603418 | -3.277731 | -2.836352 |
| 6 | 11.564961 | 2.735852  | 3.273419  |
| 6 | 11.435712 | 1.567043  | 4.004667  |
| 6 | 11.300622 | -0.687182 | -4.353356 |
| 6 | 11.169902 | 0.693530  | -4.386469 |
| 6 | 11.163014 | -1.416196 | 3.928421  |
| 6 | 11.040381 | -2.613633 | 3.174837  |
| 6 | 10.912120 | 3.239025  | -2.818326 |
| 6 | 10.802351 | 3.909320  | -1.568586 |
| 6 | 10.765060 | -4.073782 | 0.717377  |
| 6 | 10.617046 | -4.107438 | -0.734823 |
| 6 | 10.558875 | 3.985965  | 1.293129  |
| 6 | 10.427442 | 3.308959  | 2.583844  |
| 6 | 10.314691 | -2.771067 | -3.263431 |
| 6 | 10.170033 | -1.530340 | -4.037259 |
| 6 | 10.159076 | 0.900166  | 4.128911  |
| 6 | 10.033697 | -0.575939 | 4.153165  |
| 6 | 9.898282  | 1.329828  | -4.140544 |
| 6 | 9.778921  | 2.620958  | -3.418032 |
| 6 | 9.731263  | -3.045208 | 2.740494  |
| 6 | 9.596633  | -3.807298 | 1.513339  |
| 6 | 9.500315  | 4.067749  | -0.963875 |
| 6 | 9.381939  | 4.132183  | 0.480728  |
| 6 | 9.304774  | -3.946189 | -1.306230 |
| 6 | 9.154965  | -3.293899 | -2.595191 |
| 6 | 9.122993  | 2.874661  | 3.012726  |
| 6 | 8.990225  | 1.671093  | 3.813976  |
| 6 | 8.865445  | -0.938732 | -4.158502 |
| 6 | 8.728836  | 0.503416  | -4.239459 |
| 6 | 8.713546  | -1.151639 | 3.976488  |
| 6 | 8.566296  | -2.421931 | 3.315196  |
| 6 | 8.462217  | 3.028868  | -2.962649 |
| 6 | 8.326538  | 3.804539  | -1.758166 |
| 6 | 8.273242  | -3.992409 | 0.949115  |
| 6 | 8.126316  | -4.102258 | -0.470952 |
| 6 | 8.064477  | 4.012331  | 1.078109  |
| 6 | 7.934291  | 3.412761  | 2.371908  |
| 6 | 7.826951  | -2.893749 | -3.032934 |
| 6 | 7.681688  | -1.729652 | -3.853903 |
| 6 | 7.663528  | 1.098199  | 4.009715  |
| 6 | 7.527821  | -0.323748 | 4.141117  |
| 6 | 7.402054  | 1.094684  | -4.104868 |
| 6 | 7.270856  | 2.392247  | -3.505515 |
| 6 | 7.242465  | -2.888988 | 2.930186  |
| 6 | 7.099676  | -3.717354 | 1.760776  |
| 6 | 7.008529  | 4.019979  | -1.179017 |
| 6 | 6.881895  | 4.166550  | 0.249666  |
| 6 | 6.802847  | -4.017071 | -1.060516 |
| 6 | 6.654487  | -3.441887 | -2.377772 |
| 6 | 6.619328  | 3.043512  | 2.858484  |
| 6 | 6.487319  | 1.890386  | 3.724157  |
| 6 | 6.364753  | -1.169014 | -4.072828 |
| 6 | 6.227271  | 0.264719  | -4.242092 |
| 6 | 6.214089  | -0.925747 | 4.057887  |
| 6 | 6.072949  | -2.249579 | 3.482474  |
| 6 | 5.961503  | 2.870065  | -3.119108 |
| 6 | 5.831548  | 3.734063  | -1.960493 |
| 6 | 5.784960  | -3.953062 | 1.210813  |
| 6 | 5.638098  | -4.142639 | -0.218844 |
| 6 | 5.575101  | 4.096472  | 0.859206  |
| 6 | 5.446128  | 3.558936  | 2.198973  |
| 6 | 5.342190  | -3.078426 | -2.850127 |
| 6 | 5.197906  | -1.946061 | -3.741708 |
| 6 | 5.178575  | 1.332339  | 3.963565  |

|   |           |           |           |
|---|-----------|-----------|-----------|
| 6 | 5.042429  | -0.091649 | 4.171855  |
| 6 | 4.918468  | 0.864315  | -4.152130 |
| 6 | 4.785007  | 2.200544  | -3.619340 |
| 6 | 4.759926  | -2.730770 | 3.119292  |
| 6 | 4.615669  | -3.623844 | 1.995459  |
| 6 | 4.523444  | 3.969097  | -1.391657 |
| 6 | 4.395018  | 4.191666  | 0.027111  |
| 6 | 4.318857  | -4.072850 | -0.811532 |
| 6 | 4.170610  | -3.573100 | -2.154060 |
| 6 | 4.132375  | 3.201439  | 2.695576  |
| 6 | 3.999188  | 2.103685  | 3.617532  |
| 6 | 3.878929  | -1.390873 | -3.976110 |
| 6 | 3.739123  | 0.020081  | -4.224789 |
| 6 | 3.724555  | -0.696211 | 4.112596  |
| 6 | 3.583585  | -2.043403 | 3.622461  |
| 6 | 3.469248  | 2.692824  | -3.252448 |
| 6 | 3.338522  | 3.618968  | -2.155757 |
| 6 | 3.293801  | -3.880021 | 1.452646  |
| 6 | 3.145967  | -4.147554 | 0.042319  |
| 6 | 3.080378  | 4.145244  | 0.641094  |
| 6 | 2.950749  | 3.683331  | 2.003711  |
| 6 | 2.849724  | -3.233397 | -2.647650 |
| 6 | 2.705001  | -2.156253 | -3.602014 |
| 6 | 2.684946  | 1.558961  | 3.892858  |
| 6 | 2.549191  | 0.147785  | 4.185406  |
| 6 | 2.425005  | 0.626102  | -4.175736 |
| 6 | 2.290860  | 1.995471  | -3.722274 |
| 6 | 2.268416  | -2.549184 | 3.294016  |
| 6 | 2.124380  | -3.512070 | 2.220523  |
| 6 | 2.029665  | 3.891859  | -1.604702 |
| 6 | 1.901637  | 4.198644  | -0.193621 |
| 6 | 1.829864  | -4.118262 | -0.553720 |
| 6 | 1.682531  | -3.691917 | -1.931027 |
| 6 | 1.642656  | 3.358530  | 2.522648  |
| 6 | 1.510968  | 2.307394  | 3.510319  |
| 6 | 1.393125  | -1.619015 | -3.872121 |
| 6 | 1.253219  | -0.216693 | -4.202490 |
| 6 | 1.239067  | -0.457576 | 4.164861  |
| 6 | 1.098713  | -1.836183 | 3.752086  |
| 6 | 0.982655  | 2.505441  | -3.385951 |
| 6 | 0.851362  | 3.494880  | -2.341340 |
| 6 | 0.808997  | -3.793052 | 1.692334  |
| 6 | 0.661102  | -4.138245 | 0.298816  |
| 6 | 0.592409  | 4.177723  | 0.420398  |
| 6 | 0.462820  | 3.792108  | 1.803845  |
| 6 | 0.364861  | -3.373995 | -2.437995 |
| 6 | 0.219756  | -2.356287 | -3.447761 |
| 6 | 0.198042  | 1.775073  | 3.809429  |
| 6 | 0.062165  | 0.389915  | 4.180650  |
| 6 | -0.062165 | 0.390126  | -4.180634 |
| 6 | -0.198041 | 1.775265  | -3.809343 |
| 6 | -0.219755 | -2.356461 | 3.447638  |
| 6 | -0.364861 | -3.374118 | 2.437821  |
| 6 | -0.462820 | 3.792199  | -1.803658 |
| 6 | -0.592409 | 4.177743  | -0.420190 |
| 6 | -0.661103 | -4.138229 | -0.299030 |
| 6 | -0.808997 | -3.792966 | -1.692529 |
| 6 | -0.851362 | 3.494761  | 2.341513  |
| 6 | -0.982654 | 2.505270  | 3.386074  |
| 6 | -1.098713 | -1.835993 | -3.752183 |
| 6 | -1.239067 | -0.457366 | -4.164888 |
| 6 | -1.253219 | -0.216906 | 4.202476  |
| 6 | -1.393124 | -1.619211 | 3.872036  |
| 6 | -1.510969 | 2.307571  | -3.510206 |
| 6 | -1.642656 | 3.358657  | -2.522482 |
| 6 | -1.682531 | -3.692014 | 1.930837  |
| 6 | -1.829865 | -4.118290 | 0.553508  |
| 6 | -1.901637 | 4.198633  | 0.193829  |
| 6 | -2.029665 | 3.891777  | 1.604895  |
| 6 | -2.124381 | -3.511958 | -2.220704 |



|   |           |           |           |
|---|-----------|-----------|-----------|
| 6 | -2.268417 | -2.549017 | -3.294149 |
| 6 | -2.290860 | 1.995283  | 3.722373  |
| 6 | -2.425004 | 0.625891  | 4.175766  |
| 6 | -2.549192 | 0.147997  | -4.185403 |
| 6 | -2.684946 | 1.559158  | -3.892784 |
| 6 | -2.704999 | -2.156435 | 3.601903  |
| 6 | -2.849723 | -3.233531 | 2.647484  |
| 6 | -2.950749 | 3.683431  | -2.003529 |
| 6 | -3.080379 | 4.145275  | -0.640887 |
| 6 | -3.145968 | -4.147551 | -0.042531 |
| 6 | -3.293802 | -3.879946 | -1.452845 |
| 6 | -3.338522 | 3.618858  | 2.155936  |
| 6 | -3.469247 | 2.692659  | 3.252582  |
| 6 | -3.583586 | -2.043219 | -3.622568 |
| 6 | -3.724557 | -0.696003 | -4.112636 |
| 6 | -3.739121 | 0.019867  | 4.224789  |
| 6 | -3.878927 | -1.391074 | 3.976039  |
| 6 | -3.999189 | 2.103867  | -3.617430 |
| 6 | -4.132375 | 3.201574  | -2.695417 |
| 6 | -4.170610 | -3.573209 | 2.153877  |
| 6 | -4.318857 | -4.072890 | 0.811324  |
| 6 | -4.395018 | 4.191665  | -0.026901 |
| 6 | -4.523444 | 3.969024  | 1.391856  |
| 6 | -4.615670 | -3.623741 | -1.995644 |
| 6 | -4.759928 | -2.730612 | -3.119432 |
| 6 | -4.785005 | 2.200360  | 3.619449  |
| 6 | -4.918466 | 0.864104  | 4.152173  |
| 6 | -5.042430 | -0.091438 | -4.171863 |
| 6 | -5.178577 | 1.332540  | -3.963501 |
| 6 | -5.197904 | -1.946251 | 3.741609  |
| 6 | -5.342189 | -3.078570 | 2.849971  |
| 6 | -5.446129 | 3.559046  | -2.198796 |
| 6 | -5.575102 | 4.096514  | -0.859001 |
| 6 | -5.638099 | -4.142648 | 0.218633  |
| 6 | -5.784962 | -3.952998 | -1.211014 |
| 6 | -5.831547 | 3.733961  | 1.960680  |
| 6 | -5.961502 | 2.869905  | 3.119252  |
| 6 | -6.072951 | -2.249402 | -3.482590 |
| 6 | -6.214091 | -0.925541 | -4.057937 |
| 6 | -6.227269 | 0.264504  | 4.242107  |
| 6 | -6.364750 | -1.169221 | 4.072771  |
| 6 | -6.487320 | 1.890574  | -3.724065 |
| 6 | -6.619329 | 3.043657  | -2.858332 |
| 6 | -6.654486 | -3.442007 | 2.377599  |
| 6 | -6.802847 | -4.017123 | 1.060313  |
| 6 | -6.881895 | 4.166560  | -0.249457 |
| 6 | -7.008529 | 4.019916  | 1.179219  |
| 6 | -7.099678 | -3.717263 | -1.760964 |
| 6 | -7.242467 | -2.888838 | -2.930333 |
| 6 | -7.270854 | 2.392068  | 3.505636  |
| 6 | -7.402051 | 1.094476  | 4.104925  |
| 6 | -7.527823 | -0.323538 | -4.141135 |
| 6 | -7.663529 | 1.098403  | -4.009662 |
| 6 | -7.681685 | -1.729848 | 3.853820  |
| 6 | -7.826949 | -2.893903 | 3.032790  |
| 6 | -7.934292 | 3.412880  | -2.371737 |
| 6 | -8.064477 | 4.012384  | -1.077906 |
| 6 | -8.126316 | -4.102278 | 0.470746  |
| 6 | -8.273243 | -3.992357 | -0.949315 |
| 6 | -8.326537 | 3.804447  | 1.758358  |
| 6 | -8.462216 | 3.028716  | 2.962802  |
| 6 | -8.566298 | -2.421761 | -3.315317 |
| 6 | -8.713548 | -1.151436 | -3.976546 |
| 6 | -8.728834 | 0.503200  | 4.239488  |
| 6 | -8.865441 | -0.938943 | 4.158459  |
| 6 | -8.990227 | 1.671287  | -3.813893 |
| 6 | -9.122995 | 2.874814  | -3.012582 |
| 6 | -9.154963 | -3.294029 | 2.595028  |
| 6 | -9.304774 | -3.946251 | 1.306034  |
| 6 | -9.381940 | 4.132205  | -0.480518 |

|   |            |           |           |
|---|------------|-----------|-----------|
| 6 | -9.500315  | 4.067697  | 0.964081  |
| 6 | -9.596636  | -3.807217 | -1.513528 |
| 6 | -9.731266  | -3.045066 | -2.740645 |
| 6 | -9.778920  | 2.620783  | 3.418167  |
| 6 | -9.898280  | 1.329617  | 4.140617  |
| 6 | -10.033699 | -0.575727 | -4.153195 |
| 6 | -10.159077 | 0.900377  | -4.128868 |
| 6 | -10.170030 | -1.530546 | 4.037192  |
| 6 | -10.314689 | -2.771233 | 3.263299  |
| 6 | -10.427443 | 3.309090  | -2.583676 |
| 6 | -10.558876 | 3.986030  | -1.292926 |
| 6 | -10.617045 | -4.107473 | 0.734621  |
| 6 | -10.765061 | -4.073742 | -0.717579 |
| 6 | -10.802351 | 3.909238  | 1.568785  |
| 6 | -10.912118 | 3.238882  | 2.818494  |
| 6 | -11.040383 | -2.613469 | -3.174966 |
| 6 | -11.163016 | -1.415994 | -3.928489 |
| 6 | -11.169899 | 0.693306  | 4.386517  |
| 6 | -11.300617 | -0.687405 | 4.353340  |
| 6 | -11.435713 | 1.567247  | -4.004587 |
| 6 | -11.564963 | 2.736017  | -3.273276 |
| 6 | -11.603415 | -3.277878 | 2.836198  |
| 6 | -11.747550 | -3.934133 | 1.628438  |
| 6 | -11.848752 | 4.184940  | -0.643254 |
| 6 | -11.967717 | 4.166922  | 0.728162  |
| 6 | -12.063825 | -3.937876 | -1.369446 |
| 6 | -12.197884 | -3.256227 | -2.556557 |
| 1 | 13.194006  | -3.072302 | 2.982347  |
| 1 | 12.959903  | -4.302710 | 0.850654  |
| 1 | 12.959295  | 4.212273  | -1.199567 |
| 1 | 12.752502  | 4.249216  | 1.263203  |
| 1 | 12.753343  | -4.204267 | -1.282005 |
| 1 | 12.497360  | -3.038014 | -3.426557 |
| 1 | 12.566388  | 3.150036  | 3.099314  |
| 1 | 12.338445  | 1.078730  | 4.394087  |
| 1 | 12.302625  | -1.130071 | -4.421743 |
| 1 | 12.072608  | 1.311061  | -4.480213 |
| 1 | 12.173226  | -1.032259 | 4.120429  |
| 1 | 11.919173  | 3.001588  | -3.184939 |
| 1 | -11.919163 | 3.001436  | 3.185099  |
| 1 | -12.173234 | -1.032042 | -4.120471 |
| 1 | -12.072605 | 1.310831  | 4.480295  |
| 1 | -12.302614 | -1.130296 | 4.421720  |
| 1 | -12.338447 | 1.078953  | -4.394030 |
| 1 | -12.566393 | 3.150187  | -3.099141 |
| 1 | -12.497357 | -3.038192 | 3.426415  |
| 1 | -12.753336 | -4.204344 | 1.281810  |
| 1 | -12.752503 | 4.249276  | -1.262985 |
| 1 | -12.959298 | 4.212197  | 1.199783  |
| 1 | -12.959905 | -4.302656 | -0.850863 |
| 1 | -13.194011 | -3.072134 | -2.982488 |

Nanotube (7,5) u09v11  
B3LYP/STO-3G Energy: -8974.130419

|   |            |           |           |
|---|------------|-----------|-----------|
| 6 | -12.299023 | -2.428048 | -3.359860 |
| 6 | -12.177947 | -3.391686 | -2.386364 |
| 6 | -12.056893 | 3.899239  | 1.714148  |
| 6 | -11.926478 | 4.268220  | 0.394657  |
| 6 | -11.884792 | -4.161369 | 0.513834  |
| 6 | -11.746514 | -3.838744 | 1.850107  |
| 6 | -11.628188 | 3.542669  | -2.517649 |
| 6 | -11.499053 | 2.599771  | -3.522749 |
| 6 | -11.442417 | -1.726103 | 3.982250  |
| 6 | -11.305285 | -0.401131 | 4.367635  |
| 6 | -11.243222 | -0.305790 | -4.208862 |
| 6 | -11.133124 | -1.656302 | -3.785823 |
| 6 | -11.022879 | 2.458601  | 3.503052  |

|   |            |           |           |
|---|------------|-----------|-----------|
| 6 | -10.899620 | 3.425651  | 2.468287  |
| 6 | -10.884857 | -3.699441 | -1.782854 |
| 6 | -10.748146 | -4.106267 | -0.388006 |
| 6 | -10.631983 | 4.233680  | -0.275898 |
| 6 | -10.493184 | 3.910744  | -1.695625 |
| 6 | -10.458145 | -3.467158 | 2.400800  |
| 6 | -10.313210 | -2.467906 | 3.467303  |
| 6 | -10.224583 | 1.977124  | -3.804714 |
| 6 | -10.107027 | 0.556078  | -4.204551 |
| 6 | -10.028215 | 0.268569  | 4.300300  |
| 6 | -9.896943  | 1.700016  | 3.932765  |
| 6 | -9.829537  | -2.194439 | -3.468563 |
| 6 | -9.708618  | -3.246475 | -2.477132 |
| 6 | -9.591583  | 3.725611  | 1.933450  |
| 6 | -9.460871  | 4.158431  | 0.554926  |
| 6 | -9.439270  | -4.107256 | 0.213718  |
| 6 | -9.295853  | -3.809354 | 1.627958  |
| 6 | -9.187295  | 3.592275  | -2.213211 |
| 6 | -9.054192  | 2.633554  | -3.295602 |
| 6 | -9.006595  | -1.936176 | 3.744552  |
| 6 | -8.863610  | -0.563614 | 4.192816  |
| 6 | -8.791711  | -0.055331 | -4.173052 |
| 6 | -8.656790  | -1.453711 | -3.857755 |
| 6 | -8.575008  | 2.202382  | 3.606235  |
| 6 | -8.425853  | 3.259939  | 2.641542  |
| 6 | -8.390962  | -3.580042 | -1.971428 |
| 6 | -8.255526  | -4.051844 | -0.626292 |
| 6 | -8.139434  | 4.187088  | -0.044400 |
| 6 | -8.001430  | 3.938982  | -1.447798 |
| 6 | -7.969458  | -3.543877 | 2.161766  |
| 6 | -7.824617  | -2.630327 | 3.254504  |
| 6 | -7.729259  | 2.120004  | -3.622359 |
| 6 | -7.600224  | 0.778467  | -4.112378 |
| 6 | -7.533194  | 0.033541  | 4.221967  |
| 6 | -7.391073  | 1.439783  | 3.975583  |
| 6 | -7.338731  | -2.013364 | -3.596770 |
| 6 | -7.209600  | -3.114302 | -2.678215 |
| 6 | -7.102123  | 3.607627  | 2.145629  |
| 6 | -6.962825  | 4.114734  | 0.803988  |
| 6 | -6.935998  | -4.129906 | -0.026372 |
| 6 | -6.794476  | -3.913168 | 1.394541  |
| 6 | -6.684015  | 3.696981  | -2.003917 |
| 6 | -6.550720  | 2.803963  | -3.134863 |
| 6 | -6.506140  | -2.153067 | 3.617554  |
| 6 | -6.362930  | -0.812224 | 4.149274  |
| 6 | -6.290117  | 0.165482  | -4.177505 |
| 6 | -6.160983  | -1.262076 | -3.959844 |
| 6 | -6.075982  | 1.992134  | 3.733331  |
| 6 | -5.932575  | 3.123137  | 2.836149  |
| 6 | -5.900240  | -3.493185 | -2.199241 |
| 6 | -5.765279  | -4.044017 | -0.865384 |
| 6 | -5.651058  | 4.194830  | 0.205573  |
| 6 | -5.513399  | 4.018000  | -1.226279 |
| 6 | -5.483703  | -3.692263 | 1.952437  |
| 6 | -5.340407  | -2.827359 | 3.105525  |
| 6 | -5.242870  | 2.316512  | -3.500838 |
| 6 | -5.112889  | 0.992421  | -4.066599 |
| 6 | -5.050715  | -0.218419 | 4.224788  |
| 6 | -4.906891  | 1.209144  | 4.053483  |
| 6 | -4.853805  | -1.830243 | -3.724668 |
| 6 | -4.723404  | -2.982879 | -2.866496 |
| 6 | -4.619203  | 3.487904  | 2.355792  |
| 6 | -4.477889  | 4.065745  | 1.042139  |
| 6 | -4.450583  | -4.138101 | -0.266707 |
| 6 | -4.309692  | -3.999824 | 1.159963  |
| 6 | -4.197718  | 3.790055  | -1.788881 |
| 6 | -4.062432  | 2.964178  | -2.960355 |
| 6 | -4.020789  | -2.359341 | 3.481974  |
| 6 | -3.876081  | -1.060645 | 4.085079  |
| 6 | -3.799231  | 0.383163  | -4.155508 |

|   |           |           |           |
|---|-----------|-----------|-----------|
| 6 | -3.669894 | -1.045410 | -4.027045 |
| 6 | -3.586245 | 1.770322  | 3.833588  |
| 6 | -3.442418 | 2.945383  | 3.012561  |
| 6 | -3.407480 | -3.379342 | -2.399429 |
| 6 | -3.271700 | -3.999770 | -1.104351 |
| 6 | -3.158407 | 4.168549  | 0.445525  |
| 6 | -3.019221 | 4.069605  | -0.988065 |
| 6 | -2.990506 | -3.806090 | 1.731723  |
| 6 | -2.847220 | -3.010760 | 2.930290  |
| 6 | -2.748421 | 2.497825  | -3.356531 |
| 6 | -2.618056 | 1.208961  | -4.000505 |
| 6 | -2.558213 | -0.470918 | 4.201226  |
| 6 | -2.414258 | 0.967536  | 4.116551  |
| 6 | -2.359971 | -1.628720 | -3.831596 |
| 6 | -2.229849 | -2.835569 | -3.041114 |
| 6 | -2.127458 | 3.342533  | 2.559159  |
| 6 | -1.986107 | 3.999302  | 1.274929  |
| 6 | -1.959607 | -4.133784 | -0.512880 |
| 6 | -1.819997 | -4.074456 | 0.928244  |
| 6 | -1.707838 | 3.878923  | -1.563831 |
| 6 | -1.573071 | 3.114548  | -2.786614 |
| 6 | -1.534473 | -2.569501 | 3.336959  |
| 6 | -1.390419 | -1.299893 | 4.017687  |
| 6 | -1.311350 | 0.608849  | -4.128318 |
| 6 | -1.182507 | -0.830887 | -4.084364 |
| 6 | -1.101508 | 1.538754  | 3.932403  |
| 6 | -0.957538 | 2.763189  | 3.178285  |
| 6 | -0.920513 | -3.253445 | -2.595675 |
| 6 | -0.785051 | -3.944660 | -1.335589 |
| 6 | -0.672418 | 4.127781  | 0.685381  |
| 6 | -0.532427 | 4.106293  | -0.750083 |
| 6 | -0.504763 | -3.905324 | 1.507071  |
| 6 | -0.361768 | -3.180295 | 2.744245  |
| 6 | -0.260888 | 2.666359  | -3.202321 |
| 6 | -0.129759 | 1.422151  | -3.916611 |
| 6 | -0.072410 | -0.716277 | 4.160236  |
| 6 | 0.072411  | 0.716510  | 4.160196  |
| 6 | 0.129759  | -1.422369 | -3.916532 |
| 6 | 0.260888  | -2.666537 | -3.202173 |
| 6 | 0.361768  | 3.180450  | 2.744067  |
| 6 | 0.504763  | 3.905410  | 1.506854  |
| 6 | 0.532427  | -4.106333 | -0.749853 |
| 6 | 0.672418  | -4.127741 | 0.685612  |
| 6 | 0.785052  | 3.944588  | -1.335809 |
| 6 | 0.920513  | 3.253301  | -2.595856 |
| 6 | 0.957538  | -2.763011 | 3.178440  |
| 6 | 1.101508  | -1.538534 | 3.932489  |
| 6 | 1.182507  | 0.830660  | -4.084410 |
| 6 | 1.311349  | -0.609078 | -4.128284 |
| 6 | 1.390419  | 1.300118  | 4.017614  |
| 6 | 1.534473  | 2.569689  | 3.336816  |
| 6 | 1.573071  | -3.114703 | -2.786440 |
| 6 | 1.707838  | -3.879009 | -1.563615 |
| 6 | 1.819997  | 4.074510  | 0.928017  |
| 6 | 1.959608  | 4.133758  | -0.513110 |
| 6 | 1.986106  | -3.999230 | 1.275153  |
| 6 | 2.127457  | -3.342389 | 2.559346  |
| 6 | 2.229850  | 2.835400  | -3.041271 |
| 6 | 2.359971  | 1.628507  | -3.831685 |
| 6 | 2.414258  | -0.967306 | 4.116605  |
| 6 | 2.558213  | 0.471154  | 4.201200  |
| 6 | 2.618056  | -1.209183 | -4.000437 |
| 6 | 2.748421  | -2.498011 | -3.356391 |
| 6 | 2.847219  | 3.010926  | 2.930123  |
| 6 | 2.990506  | 3.806189  | 1.731512  |
| 6 | 3.019221  | -4.069659 | -0.987838 |
| 6 | 3.158407  | -4.168524 | 0.445758  |
| 6 | 3.271701  | 3.999710  | -1.104572 |
| 6 | 3.407481  | 3.379209  | -2.399616 |
| 6 | 3.442418  | -2.945214 | 3.012726  |

|   |           |           |           |
|---|-----------|-----------|-----------|
| 6 | 3.586245  | -1.770108 | 3.833687  |
| 6 | 3.669895  | 1.045186  | -4.027101 |
| 6 | 3.799230  | -0.383394 | -4.155486 |
| 6 | 3.876080  | 1.060874  | 4.085020  |
| 6 | 4.020789  | 2.359537  | 3.481843  |
| 6 | 4.062431  | -2.964343 | -2.960190 |
| 6 | 4.197717  | -3.790154 | -1.788670 |
| 6 | 4.309693  | 3.999890  | 1.159742  |
| 6 | 4.450584  | 4.138086  | -0.266936 |
| 6 | 4.477889  | -4.065686 | 1.042366  |
| 6 | 4.619204  | -3.487771 | 2.355987  |
| 6 | 4.723405  | 2.982719  | -2.866660 |
| 6 | 4.853806  | 1.830035  | -3.724767 |
| 6 | 4.906890  | -1.208917 | 4.053551  |
| 6 | 5.050715  | 0.218656  | 4.224777  |
| 6 | 5.112888  | -0.992648 | -4.066544 |
| 6 | 5.242869  | -2.316707 | -3.500709 |
| 6 | 5.340407  | 2.827534  | 3.105369  |
| 6 | 5.483703  | 3.692374  | 1.952234  |
| 6 | 5.513399  | -4.018068 | -1.226055 |
| 6 | 5.651058  | -4.194816 | 0.205807  |
| 6 | 5.765280  | 4.043968  | -0.865607 |
| 6 | 5.900242  | 3.493061  | -2.199433 |
| 6 | 5.932575  | -3.122978 | 2.836324  |
| 6 | 6.075981  | -1.991925 | 3.733442  |
| 6 | 6.160983  | 1.261854  | -3.959913 |
| 6 | 6.290116  | -0.165715 | -4.177496 |
| 6 | 6.362929  | 0.812458  | 4.149231  |
| 6 | 6.506140  | 2.153271  | 3.617435  |
| 6 | 6.550719  | -2.804139 | -3.134707 |
| 6 | 6.684015  | -3.697093 | -2.003712 |
| 6 | 6.794477  | 3.913246  | 1.394325  |
| 6 | 6.935999  | 4.129903  | -0.026600 |
| 6 | 6.962825  | -4.114687 | 0.804218  |
| 6 | 7.102123  | -3.607505 | 2.145830  |
| 6 | 7.209602  | 3.114150  | -2.678386 |
| 6 | 7.338731  | 2.013162  | -3.596880 |
| 6 | 7.391072  | -1.439559 | 3.975663  |
| 6 | 7.533193  | -0.033304 | 4.221971  |
| 6 | 7.600222  | -0.778699 | -4.112337 |
| 6 | 7.729258  | -2.120208 | -3.622243 |
| 6 | 7.824617  | 2.630510  | 3.254360  |
| 6 | 7.969459  | 3.543998  | 2.161571  |
| 6 | 8.001429  | -3.939062 | -1.447580 |
| 6 | 8.139435  | -4.187088 | -0.044167 |
| 6 | 8.255527  | 4.051806  | -0.626515 |
| 6 | 8.390964  | 3.579929  | -1.971625 |
| 6 | 8.425853  | -3.259790 | 2.641723  |
| 6 | 8.575008  | -2.202179 | 3.606358  |
| 6 | 8.656790  | 1.453494  | -3.857837 |
| 6 | 8.791708  | 0.055096  | -4.173060 |
| 6 | 8.863610  | 0.563850  | 4.192788  |
| 6 | 9.006595  | 1.936385  | 3.744448  |
| 6 | 9.054190  | -2.633741 | -3.295459 |
| 6 | 9.187295  | -3.592401 | -2.213014 |
| 6 | 9.295854  | 3.809443  | 1.627748  |
| 6 | 9.439272  | 4.107266  | 0.213491  |
| 6 | 9.460872  | -4.158395 | 0.555156  |
| 6 | 9.591583  | -3.725501 | 1.933656  |
| 6 | 9.708620  | 3.246333  | -2.477311 |
| 6 | 9.829536  | 2.194244  | -3.468687 |
| 6 | 9.896942  | -1.699796 | 3.932861  |
| 6 | 10.028214 | -0.268328 | 4.300316  |
| 6 | 10.107025 | -0.556316 | -4.204525 |
| 6 | 10.224581 | -1.977340 | -3.804610 |
| 6 | 10.313211 | 2.468098  | 3.467167  |
| 6 | 10.458146 | 3.467290  | 2.400609  |
| 6 | 10.493184 | -3.910837 | -1.695410 |
| 6 | 10.631984 | -4.233689 | -0.275664 |
| 6 | 10.748148 | 4.106239  | -0.388232 |

|   |            |           |           |
|---|------------|-----------|-----------|
| 6 | 10.884859  | 3.699335  | -1.783057 |
| 6 | 10.899620  | -3.425510 | 2.468476  |
| 6 | 11.022879  | -2.458405 | 3.503191  |
| 6 | 11.133122  | 1.656086  | -3.785917 |
| 6 | 11.243218  | 0.305552  | -4.208896 |
| 6 | 11.305284  | 0.401374  | 4.367616  |
| 6 | 11.442418  | 1.726322  | 3.982153  |
| 6 | 11.499050  | -2.599974 | -3.522612 |
| 6 | 11.628187  | -3.542806 | -2.517455 |
| 6 | 11.746514  | 3.838844  | 1.849896  |
| 6 | 11.884794  | 4.161390  | 0.513606  |
| 6 | 11.926477  | -4.268191 | 0.394894  |
| 6 | 12.056892  | -3.899140 | 1.714363  |
| 6 | 12.177950  | 3.391541  | -2.386550 |
| 6 | 12.299023  | 2.427851  | -3.359995 |
| 1 | -13.290740 | -2.134401 | -3.731244 |
| 1 | -13.079971 | -3.871109 | -1.984571 |
| 1 | -13.052051 | 3.829493  | 2.175264  |
| 1 | -12.824592 | 4.496711  | -0.193656 |
| 1 | -12.889126 | -4.327550 | 0.103368  |
| 1 | -12.643454 | -3.753570 | 2.477120  |
| 1 | -12.628536 | 3.906987  | -2.250898 |
| 1 | -12.400771 | 2.234955  | -4.031494 |
| 1 | -12.446778 | -2.165671 | 3.930288  |
| 1 | -12.205423 | 0.177925  | 4.611501  |
| 1 | -12.249641 | 0.122020  | -4.303779 |
| 1 | -12.033940 | 2.142116  | 3.790768  |
| 1 | 12.033937  | -2.141908 | 3.790890  |
| 1 | 12.249618  | -0.122253 | -4.303805 |
| 1 | 12.205423  | -0.177670 | 4.611510  |
| 1 | 12.446783  | 2.165882  | 3.930155  |
| 1 | 12.400768  | -2.235193 | -4.031383 |
| 1 | 12.628544  | -3.907099 | -2.250673 |
| 1 | 12.643455  | 3.753707  | 2.476914  |
| 1 | 12.889133  | 4.327545  | 0.103131  |
| 1 | 12.824592  | -4.496715 | -0.193405 |
| 1 | 13.052053  | -3.829372 | 2.175474  |
| 1 | 13.079975  | 3.870985  | -1.984781 |
| 1 | 13.290737  | 2.134184  | -3.731365 |

Nanotube (7,5) u10v00  
B3LYP/STO-3G Energy: -9049.425986

|   |           |           |           |
|---|-----------|-----------|-----------|
| 6 | 12.425421 | -1.530421 | 3.802500  |
| 6 | 12.293239 | -2.710220 | 3.108957  |
| 6 | 12.158517 | 3.283452  | -2.722664 |
| 6 | 12.040785 | 3.978488  | -1.540806 |
| 6 | 11.972862 | -4.194695 | 0.504613  |
| 6 | 11.823597 | -4.225106 | -0.868329 |
| 6 | 11.765413 | 4.025337  | 1.462216  |
| 6 | 11.641680 | 3.373596  | 2.676807  |
| 6 | 11.506573 | -2.729602 | -3.468711 |
| 6 | 11.369715 | -1.547873 | -4.180581 |
| 6 | 11.382840 | 0.743527  | 4.087619  |
| 6 | 11.265204 | -0.669171 | 4.025376  |
| 6 | 11.103920 | 1.438809  | -4.075422 |
| 6 | 10.992933 | 2.638547  | -3.321797 |
| 6 | 10.993856 | -3.155670 | 2.613809  |
| 6 | 10.843950 | -3.904898 | 1.371312  |
| 6 | 10.751796 | 4.123747  | -0.873770 |
| 6 | 10.624201 | 4.176378  | 0.581618  |
| 6 | 10.531051 | -4.000982 | -1.486026 |
| 6 | 10.379444 | -3.308793 | -2.771597 |
| 6 | 10.367252 | 2.851009  | 3.118894  |
| 6 | 10.248655 | 1.581492  | 3.870856  |
| 6 | 10.094814 | -0.876673 | -4.277343 |
| 6 | 9.971277  | 0.601235  | -4.288073 |
| 6 | 9.957127  | -1.264334 | 3.866671  |

|   |          |           |           |
|---|----------|-----------|-----------|
| 6 | 9.824747 | -2.534454 | 3.178627  |
| 6 | 9.690390 | 3.072856  | -2.871746 |
| 6 | 9.573124 | 3.844955  | -1.649121 |
| 6 | 9.529701 | -4.054355 | 0.800117  |
| 6 | 9.374601 | -4.128387 | -0.642167 |
| 6 | 9.321660 | 4.009141  | 1.173713  |
| 6 | 9.194624 | 3.361228  | 2.467152  |
| 6 | 9.071827 | -2.859951 | -3.166410 |
| 6 | 8.928776 | -1.647664 | -3.951113 |
| 6 | 8.931511 | 0.989183  | 4.007370  |
| 6 | 8.789961 | -0.442838 | 4.062079  |
| 6 | 8.654145 | 1.177599  | -4.091131 |
| 6 | 8.517095 | 2.447877  | -3.428203 |
| 6 | 8.502149 | -2.979984 | 2.785423  |
| 6 | 8.353775 | -3.779880 | 1.607014  |
| 6 | 8.257338 | 4.033527  | -1.067191 |
| 6 | 8.130597 | 4.154135  | 0.353927  |
| 6 | 8.044558 | -4.002134 | -1.215885 |
| 6 | 7.892465 | -3.398786 | -2.505132 |
| 6 | 7.871119 | 2.955331  | 2.924407  |
| 6 | 7.742022 | 1.785392  | 3.742978  |
| 6 | 7.600122 | -1.070899 | -4.121468 |
| 6 | 7.464579 | 0.351830  | -4.242782 |
| 6 | 7.468153 | -1.044032 | 3.962626  |
| 6 | 7.328112 | -2.342425 | 3.358160  |
| 6 | 7.198994 | 2.917917  | -3.027454 |
| 6 | 7.073061 | 3.752245  | -1.859998 |
| 6 | 7.028696 | -4.002385 | 1.057102  |
| 6 | 6.875137 | -4.156255 | -0.370041 |
| 6 | 6.816955 | 4.069548  | 0.963439  |
| 6 | 6.690155 | 3.497382  | 2.285915  |
| 6 | 6.571690 | -3.023526 | -2.967908 |
| 6 | 6.427480 | -1.863851 | -3.824306 |
| 6 | 6.430238 | 1.216033  | 3.972663  |
| 6 | 6.295125 | -0.218455 | 4.129663  |
| 6 | 6.153060 | 0.954916  | -4.139876 |
| 6 | 6.021420 | 2.278646  | -3.562107 |
| 6 | 6.013328 | -2.825371 | 3.002557  |
| 6 | 5.865351 | -3.699094 | 1.855798  |
| 6 | 5.766583 | 3.990677  | -1.292250 |
| 6 | 5.640540 | 4.187399  | 0.137984  |
| 6 | 5.559792 | -4.079764 | -0.955805 |
| 6 | 5.408390 | -3.538535 | -2.290949 |
| 6 | 5.383787 | 3.127080  | 2.774558  |
| 6 | 5.254432 | 1.992909  | 3.662093  |
| 6 | 5.116304 | -1.302486 | -4.039487 |
| 6 | 4.978585 | 0.122209  | -4.239429 |
| 6 | 4.984585 | -0.821499 | 4.058282  |
| 6 | 4.843887 | -2.155486 | 3.525813  |
| 6 | 4.713847 | 2.761955  | -3.181814 |
| 6 | 4.586072 | 3.658374  | -2.059165 |
| 6 | 4.545698 | -3.937591 | 1.311662  |
| 6 | 4.392460 | -4.168571 | -0.101844 |
| 6 | 4.329320 | 4.118339  | 0.749971  |
| 6 | 4.201049 | 3.620457  | 2.094758  |
| 6 | 4.087039 | -3.175612 | -2.763975 |
| 6 | 3.940524 | -2.074101 | -3.678447 |
| 6 | 3.939935 | 1.433173  | 3.913348  |
| 6 | 3.805402 | 0.020547  | 4.156912  |
| 6 | 3.662071 | 0.728082  | -4.160197 |
| 6 | 3.529628 | 2.075140  | -3.667936 |
| 6 | 3.523130 | -2.652178 | 3.185978  |
| 6 | 3.374622 | -3.583169 | 2.095229  |
| 6 | 3.272373 | 3.917906  | -1.498822 |
| 6 | 3.144892 | 4.189818  | -0.087367 |
| 6 | 3.068598 | -4.120683 | -0.693741 |
| 6 | 2.916294 | -3.657714 | -2.053735 |
| 6 | 2.888552 | 3.277248  | 2.606360  |
| 6 | 2.759275 | 2.197533  | 3.559430  |
| 6 | 2.622924 | -1.526406 | -3.930611 |

|   |           |           |           |
|---|-----------|-----------|-----------|
| 6 | 2.484342  | -0.114563 | -4.217236 |
| 6 | 2.491735  | -0.587142 | 4.127452  |
| 6 | 2.351852  | -1.955850 | 3.675737  |
| 6 | 2.219800  | 2.583195  | -3.321951 |
| 6 | 2.092037  | 3.548436  | -2.249152 |
| 6 | 2.056743  | -3.859128 | 1.568431  |
| 6 | 1.904338  | -4.169993 | 0.161537  |
| 6 | 1.837484  | 4.160338  | 0.527755  |
| 6 | 1.710136  | 3.734276  | 1.906050  |
| 6 | 1.600558  | -3.328492 | -2.549138 |
| 6 | 1.453752  | -2.274499 | -3.530904 |
| 6 | 1.451682  | 1.656814  | 3.846346  |
| 6 | 1.318438  | 0.254470  | 4.175053  |
| 6 | 1.175072  | 0.492190  | -4.176369 |
| 6 | 1.042368  | 1.870904  | -3.762693 |
| 6 | 1.038188  | -2.468769 | 3.363700  |
| 6 | 0.890399  | -3.460783 | 2.324830  |
| 6 | 0.784361  | 3.832387  | -1.703060 |
| 6 | 0.656462  | 4.179551  | -0.308528 |
| 6 | 0.584961  | -4.148708 | -0.430548 |
| 6 | 0.432075  | -3.761807 | -1.810654 |
| 6 | 0.400268  | 3.413641  | 2.431491  |
| 6 | 0.270887  | 2.393832  | 3.440847  |
| 6 | 0.136601  | -1.739513 | -3.806493 |
| 6 | -0.003477 | -0.354066 | -4.174007 |
| 6 | 0.003477  | -0.354083 | 4.174001  |
| 6 | -0.136600 | -1.739529 | 3.806483  |
| 6 | -0.270887 | 2.393847  | -3.440844 |
| 6 | -0.400268 | 3.413651  | -2.431484 |
| 6 | -0.432075 | -3.761815 | 1.810635  |
| 6 | -0.584961 | -4.148710 | 0.430528  |
| 6 | -0.656462 | 4.179551  | 0.308539  |
| 6 | -0.784360 | 3.832380  | 1.703070  |
| 6 | -0.890400 | -3.460773 | -2.324847 |
| 6 | -1.038188 | -2.468755 | -3.363713 |
| 6 | -1.042367 | 1.870889  | 3.762695  |
| 6 | -1.175071 | 0.492174  | 4.176366  |
| 6 | -1.318438 | 0.254487  | -4.175056 |
| 6 | -1.451682 | 1.656829  | -3.846345 |
| 6 | -1.453751 | -2.274514 | 3.530891  |
| 6 | -1.600558 | -3.328503 | 2.549122  |
| 6 | -1.710136 | 3.734284  | -1.906041 |
| 6 | -1.837484 | 4.160341  | -0.527744 |
| 6 | -1.904338 | -4.169992 | -0.161557 |
| 6 | -2.056743 | -3.859121 | -1.568450 |
| 6 | -2.092037 | 3.548427  | 2.249160  |
| 6 | -2.219798 | 2.583182  | 3.321955  |
| 6 | -2.351853 | -1.955834 | -3.675748 |
| 6 | -2.491736 | -0.587125 | -4.127458 |
| 6 | -2.484341 | -0.114580 | 4.217231  |
| 6 | -2.622923 | -1.526422 | 3.930601  |
| 6 | -2.759276 | 2.197548  | -3.559426 |
| 6 | -2.888553 | 3.277259  | -2.606352 |
| 6 | -2.916294 | -3.657723 | 2.053718  |
| 6 | -3.068599 | -4.120686 | 0.693722  |
| 6 | -3.144893 | 4.189818  | 0.087377  |
| 6 | -3.272372 | 3.917901  | 1.498831  |
| 6 | -3.374623 | -3.583160 | -2.095246 |
| 6 | -3.523131 | -2.652165 | -3.185991 |
| 6 | -3.529626 | 2.075125  | 3.667939  |
| 6 | -3.662069 | 0.728065  | 4.160195  |
| 6 | -3.805403 | 0.020564  | -4.156916 |
| 6 | -3.939936 | 1.433189  | -3.913346 |
| 6 | -3.940522 | -2.074116 | 3.678437  |
| 6 | -4.087039 | -3.175624 | 2.763960  |
| 6 | -4.201051 | 3.620467  | -2.094749 |
| 6 | -4.329321 | 4.118344  | -0.749960 |
| 6 | -4.392461 | -4.168571 | 0.101825  |
| 6 | -4.545699 | -3.937585 | -1.311681 |
| 6 | -4.586071 | 3.658366  | 2.059174  |



|   |            |           |           |
|---|------------|-----------|-----------|
| 6 | -4.713845  | 2.761942  | 3.181820  |
| 6 | -4.843888  | -2.155471 | -3.525825 |
| 6 | -4.984587  | -0.821482 | -4.058288 |
| 6 | -4.978582  | 0.122192  | 4.239425  |
| 6 | -5.116301  | -1.302502 | 4.039479  |
| 6 | -5.254434  | 1.992924  | -3.662088 |
| 6 | -5.383789  | 3.127093  | -2.774549 |
| 6 | -5.408390  | -3.538543 | 2.290934  |
| 6 | -5.559792  | -4.079768 | 0.955787  |
| 6 | -5.640541  | 4.187401  | -0.137972 |
| 6 | -5.766582  | 3.990672  | 1.292261  |
| 6 | -5.865352  | -3.699085 | -1.855814 |
| 6 | -6.013330  | -2.825358 | -3.002570 |
| 6 | -6.021417  | 2.278631  | 3.562111  |
| 6 | -6.153056  | 0.954899  | 4.139875  |
| 6 | -6.295126  | -0.218439 | -4.129666 |
| 6 | -6.430240  | 1.216049  | -3.972660 |
| 6 | -6.427478  | -1.863866 | 3.824297  |
| 6 | -6.571690  | -3.023536 | 2.967895  |
| 6 | -6.690157  | 3.497393  | -2.285905 |
| 6 | -6.816958  | 4.069553  | -0.963427 |
| 6 | -6.875138  | -4.156255 | 0.370024  |
| 6 | -7.028697  | -4.002379 | -1.057118 |
| 6 | -7.073060  | 3.752237  | 1.860008  |
| 6 | -7.198990  | 2.917905  | 3.027461  |
| 6 | -7.328114  | -2.342411 | -3.358171 |
| 6 | -7.468155  | -1.044016 | -3.962633 |
| 6 | -7.464574  | 0.351813  | 4.242781  |
| 6 | -7.600119  | -1.070915 | 4.121463  |
| 6 | -7.742024  | 1.785408  | -3.742973 |
| 6 | -7.871122  | 2.955344  | -2.924398 |
| 6 | -7.892465  | -3.398794 | 2.505119  |
| 6 | -8.044559  | -4.002136 | 1.215869  |
| 6 | -8.130600  | 4.154137  | -0.353913 |
| 6 | -8.257338  | 4.033523  | 1.067205  |
| 6 | -8.353777  | -3.779871 | -1.607029 |
| 6 | -8.502151  | -2.979972 | -2.785436 |
| 6 | -8.517091  | 2.447863  | 3.428213  |
| 6 | -8.654139  | 1.177583  | 4.091138  |
| 6 | -8.789963  | -0.442823 | -4.062083 |
| 6 | -8.931512  | 0.989198  | -4.007368 |
| 6 | -8.928774  | -1.647678 | 3.951110  |
| 6 | -9.071826  | -2.859962 | 3.166401  |
| 6 | -9.194627  | 3.361239  | -2.467141 |
| 6 | -9.321664  | 4.009146  | -1.173698 |
| 6 | -9.374602  | -4.128386 | 0.642152  |
| 6 | -9.529702  | -4.054349 | -0.800132 |
| 6 | -9.573123  | 3.844946  | 1.649137  |
| 6 | -9.690384  | 3.072846  | 2.871762  |
| 6 | -9.824749  | -2.534440 | -3.178638 |
| 6 | -9.957130  | -1.264318 | -3.866677 |
| 6 | -9.971270  | 0.601221  | 4.288087  |
| 6 | -10.094812 | -0.876688 | 4.277351  |
| 6 | -10.248654 | 1.581507  | -3.870850 |
| 6 | -10.367254 | 2.851019  | -3.118880 |
| 6 | -10.379443 | -3.308800 | 2.771588  |
| 6 | -10.531052 | -4.000981 | 1.486012  |
| 6 | -10.624206 | 4.176367  | -0.581597 |
| 6 | -10.751796 | 4.123733  | 0.873789  |
| 6 | -10.843950 | -3.904889 | -1.371325 |
| 6 | -10.993858 | -3.155656 | -2.613819 |
| 6 | -10.992926 | 2.638538  | 3.321819  |
| 6 | -11.103907 | 1.438811  | 4.075471  |
| 6 | -11.265207 | -0.669154 | -4.025373 |
| 6 | -11.382841 | 0.743544  | -4.087612 |
| 6 | -11.369712 | -1.547893 | 4.180598  |
| 6 | -11.506572 | -2.729615 | 3.468713  |
| 6 | -11.641682 | 3.373589  | -2.676784 |
| 6 | -11.765422 | 4.025304  | -1.462181 |
| 6 | -11.823599 | -4.225102 | 0.868314  |

|   |            |           |           |
|---|------------|-----------|-----------|
| 6 | -11.972863 | -4.194691 | -0.504626 |
| 6 | -12.040786 | 3.978469  | 1.540827  |
| 6 | -12.158513 | 3.283441  | 2.722689  |
| 6 | -12.293243 | -2.710200 | -3.108958 |
| 6 | -12.425427 | -1.530396 | -3.802485 |
| 1 | 13.421197  | -1.156302 | 4.079212  |
| 1 | 13.190242  | -3.281452 | 2.836648  |
| 1 | 13.149503  | 3.092590  | -3.158415 |
| 1 | 12.944602  | 4.345606  | -1.037427 |
| 1 | 12.980533  | -4.254721 | 0.936537  |
| 1 | 12.715024  | -4.308440 | -1.503478 |
| 1 | 12.764877  | 4.303217  | 1.102649  |
| 1 | 12.546308  | 3.147292  | 3.256045  |
| 1 | 12.510339  | -3.146300 | -3.312842 |
| 1 | 12.269063  | -1.055483 | -4.572818 |
| 1 | 12.390998  | 1.176493  | 4.062352  |
| 1 | 12.111230  | 1.053729  | -4.280547 |
| 1 | -12.111170 | 1.053781  | 4.280666  |
| 1 | -12.390997 | 1.176512  | -4.062347 |
| 1 | -12.269059 | -1.055515 | 4.572850  |
| 1 | -12.510337 | -3.146313 | 3.312843  |
| 1 | -12.546313 | 3.147281  | -3.256019 |
| 1 | -12.764912 | 4.303130  | -1.102575 |
| 1 | -12.715028 | -4.308437 | 1.503462  |
| 1 | -12.980528 | -4.254726 | -0.936548 |
| 1 | -12.944606 | 4.345585  | 1.037448  |
| 1 | -13.149493 | 3.092590  | 3.158446  |
| 1 | -13.190247 | -3.281429 | -2.836645 |
| 1 | -13.421219 | -1.156254 | -4.079163 |

Nanotube (7,5) u10v01  
B3LYP/STO-3G Energy: -9124.721368

|   |           |           |           |
|---|-----------|-----------|-----------|
| 6 | 12.494245 | 0.478844  | -4.150192 |
| 6 | 12.369468 | 1.797015  | -3.780075 |
| 6 | 12.285109 | -2.500844 | 3.400499  |
| 6 | 12.156766 | -3.473886 | 2.436153  |
| 6 | 12.074710 | 3.899316  | -1.638477 |
| 6 | 11.938403 | 4.280078  | -0.317881 |
| 6 | 11.854484 | -4.285968 | -0.453548 |
| 6 | 11.719812 | -3.967057 | -1.793182 |
| 6 | 11.643959 | 3.502632  | 2.582327  |
| 6 | 11.512641 | 2.543976  | 3.574795  |
| 6 | 11.448019 | -1.788991 | -3.832174 |
| 6 | 11.331458 | -0.407748 | -4.133110 |
| 6 | 11.243522 | -0.368140 | 4.244263  |
| 6 | 11.125107 | -1.719877 | 3.823716  |
| 6 | 11.075022 | 2.358111  | -3.402640 |
| 6 | 10.937354 | 3.400197  | -2.392156 |
| 6 | 10.861742 | -3.780739 | 1.838411  |
| 6 | 10.720963 | -4.203428 | 0.446650  |
| 6 | 10.651181 | 4.225457  | 0.348233  |
| 6 | 10.510680 | 3.886833  | 1.769114  |
| 6 | 10.440900 | -3.572941 | -2.343675 |
| 6 | 10.315432 | -2.539846 | -3.395545 |
| 6 | 10.237569 | 1.924382  | 3.851990  |
| 6 | 10.113017 | 0.499827  | 4.243283  |
| 6 | 10.025092 | 0.212173  | -4.119893 |
| 6 | 9.899990  | 1.616407  | -3.779258 |
| 6 | 9.818283  | -2.251179 | 3.510297  |
| 6 | 9.689891  | -3.310010 | 2.527044  |
| 6 | 9.628497  | 3.695219  | -1.866697 |
| 6 | 9.486913  | 4.136616  | -0.490154 |
| 6 | 9.412988  | -4.190946 | -0.157205 |
| 6 | 9.274174  | -3.896356 | -1.572525 |
| 6 | 9.206244  | 3.559083  | 2.277524  |
| 6 | 9.069256  | 2.589555  | 3.348778  |
| 6 | 8.997354  | -1.998897 | -3.667750 |

|   |          |           |           |
|---|----------|-----------|-----------|
| 6 | 8.855802 | -0.628527 | -4.087366 |
| 6 | 8.794053 | -0.103895 | 4.211757  |
| 6 | 8.650405 | -1.501384 | 3.897963  |
| 6 | 8.581674 | 2.151681  | -3.501530 |
| 6 | 8.445044 | 3.227151  | -2.565991 |
| 6 | 8.369215 | -3.637880 | 2.024238  |
| 6 | 8.229632 | -4.118179 | 0.682684  |
| 6 | 8.162418 | 4.165918  | 0.108375  |
| 6 | 8.021559 | 3.913782  | 1.510333  |
| 6 | 7.946830 | -3.617890 | -2.106809 |
| 6 | 7.810264 | -2.696925 | -3.196636 |
| 6 | 7.741900 | 2.079705  | 3.672430  |
| 6 | 7.606380 | 0.736619  | 4.155705  |
| 6 | 7.535397 | -0.018114 | -4.133031 |
| 6 | 7.401818 | 1.391779  | -3.880748 |
| 6 | 7.328669 | -2.054546 | 3.641798  |
| 6 | 7.192047 | -3.159392 | 2.728791  |
| 6 | 7.125336 | 3.587012  | -2.079540 |
| 6 | 6.985188 | 4.101682  | -0.738796 |
| 6 | 6.910336 | -4.189130 | 0.083262  |
| 6 | 6.771342 | -3.974868 | -1.339744 |
| 6 | 6.704431 | 3.673759  | 2.065269  |
| 6 | 6.566757 | 2.773506  | 3.191177  |
| 6 | 6.496164 | -2.201792 | -3.552903 |
| 6 | 6.360010 | -0.855914 | -4.071527 |
| 6 | 6.293197 | 0.130999  | 4.221986  |
| 6 | 6.155694 | -1.295855 | 4.004733  |
| 6 | 6.090475 | 1.953807  | -3.649181 |
| 6 | 5.954053 | 3.092783  | -2.764021 |
| 6 | 5.880198 | -3.532423 | 2.252740  |
| 6 | 5.741235 | -4.089042 | 0.922111  |
| 6 | 5.675089 | 4.182726  | -0.141590 |
| 6 | 5.535306 | 4.002320  | 1.288872  |
| 6 | 5.460480 | -3.739325 | -1.895683 |
| 6 | 5.322928 | -2.870159 | -3.043206 |
| 6 | 5.257094 | 2.290273  | 3.554545  |
| 6 | 5.120102 | 0.964788  | 4.114551  |
| 6 | 5.050494 | -0.251045 | -4.145717 |
| 6 | 4.915735 | 1.175611  | -3.972556 |
| 6 | 4.844901 | -1.857089 | 3.772750  |
| 6 | 4.706998 | -3.011653 | 2.919067  |
| 6 | 4.640121 | 3.467414  | -2.288032 |
| 6 | 4.500358 | 4.053837  | -0.979657 |
| 6 | 4.425069 | -4.176238 | 0.324534  |
| 6 | 4.284409 | -4.039110 | -1.101770 |
| 6 | 4.218379 | 3.776961  | 1.850369  |
| 6 | 4.078917 | 2.946783  | 3.017448  |
| 6 | 4.006567 | -2.389765 | -3.417295 |
| 6 | 3.870115 | -1.086556 | -4.013464 |
| 6 | 3.802766 | 0.362593  | 4.203795  |
| 6 | 3.665265 | -1.064839 | 4.075333  |
| 6 | 3.598853 | 1.746739  | -3.759417 |
| 6 | 3.461549 | 2.926986  | -2.943799 |
| 6 | 3.388448 | -3.402786 | 2.455306  |
| 6 | 3.248298 | -4.027350 | 1.162894  |
| 6 | 3.182129 | 4.163551  | -0.383784 |
| 6 | 3.041568 | 4.064898  | 1.049921  |
| 6 | 2.967138 | -3.834582 | -1.672402 |
| 6 | 2.828729 | -3.034703 | -2.867943 |
| 6 | 2.762790 | 2.485489  | 3.412050  |
| 6 | 2.625433 | 1.195321  | 4.051756  |
| 6 | 2.556569 | -0.487666 | -4.128173 |
| 6 | 2.421904 | 0.950853  | -4.042559 |
| 6 | 2.351736 | -1.641288 | 3.882563  |
| 6 | 2.214356 | -2.849723 | 3.096150  |
| 6 | 2.148714 | 3.333851  | -2.494200 |
| 6 | 2.009846 | 3.996340  | -1.213715 |
| 6 | 1.935152 | -4.154479 | 0.572409  |
| 6 | 1.795030 | -4.095454 | -0.867698 |
| 6 | 1.729828 | 3.878178  | 1.624418  |

|   |           |           |           |
|---|-----------|-----------|-----------|
| 6 | 1.590522  | 3.110488  | 2.844051  |
| 6 | 1.518155  | -2.581996 | -3.271752 |
| 6 | 1.382039  | -1.310017 | -3.947317 |
| 6 | 1.315386  | 0.602254  | 4.178826  |
| 6 | 1.178426  | -0.836464 | 4.134885  |
| 6 | 1.111656  | 1.531131  | -3.861584 |
| 6 | 0.974962  | 2.758520  | -3.112636 |
| 6 | 0.902450  | -3.262191 | 2.653470  |
| 6 | 0.762322  | -3.956686 | 1.396188  |
| 6 | 0.696474  | 4.133321  | -0.624921 |
| 6 | 0.555677  | 4.112900  | 0.809761  |
| 6 | 0.480977  | -3.917236 | -1.445772 |
| 6 | 0.341622  | -3.187816 | -2.680620 |
| 6 | 0.275718  | 2.667502  | 3.257600  |
| 6 | 0.137518  | 1.422521  | 3.968128  |
| 6 | 0.067752  | -0.717691 | -4.089019 |
| 6 | -0.067753 | 0.716117  | -4.089294 |
| 6 | -0.137520 | -1.420993 | 3.968673  |
| 6 | -0.275718 | -2.666248 | 3.258624  |
| 6 | -0.341622 | 3.186784  | -2.681844 |
| 6 | -0.480976 | 3.916681  | -1.447277 |
| 6 | -0.555675 | -4.112589 | 0.811342  |
| 6 | -0.696472 | -4.133562 | -0.623333 |
| 6 | -0.762321 | 3.957224  | 1.394668  |
| 6 | -0.902450 | 3.263213  | 2.652217  |
| 6 | -0.974961 | -2.759718 | -3.111577 |
| 6 | -1.111657 | -1.532617 | -3.860996 |
| 6 | -1.178427 | 0.838055  | 4.134564  |
| 6 | -1.315388 | -0.600647 | 4.179056  |
| 6 | -1.382040 | 1.308498  | -3.947818 |
| 6 | -1.518155 | 2.580737  | -3.272742 |
| 6 | -1.590521 | -3.109394 | 2.845246  |
| 6 | -1.729827 | -3.877553 | 1.625908  |
| 6 | -1.795028 | 4.095121  | -0.869271 |
| 6 | -1.935150 | 4.154700  | 0.570813  |
| 6 | -2.009844 | -3.996808 | -1.212179 |
| 6 | -2.148712 | -3.334812 | -2.492919 |
| 6 | -2.214356 | 2.850914  | 3.095056  |
| 6 | -2.351737 | 1.642782  | 3.881930  |
| 6 | -2.421905 | -0.952408 | -4.042192 |
| 6 | -2.556570 | 0.486078  | -4.128357 |
| 6 | -2.625434 | -1.193762 | 4.052212  |
| 6 | -2.762790 | -2.484175 | 3.413003  |
| 6 | -2.828729 | 3.033599  | -2.869106 |
| 6 | -2.967137 | 3.833939  | -1.673874 |
| 6 | -3.041566 | -4.064494 | 1.051483  |
| 6 | -3.182127 | -4.163701 | -0.382183 |
| 6 | -3.248296 | 4.027800  | 1.161348  |
| 6 | -3.388447 | 3.403732  | 2.453999  |
| 6 | -3.461548 | -2.928120 | -2.942674 |
| 6 | -3.598854 | -1.748185 | -3.758743 |
| 6 | -3.665267 | 1.066406  | 4.074921  |
| 6 | -3.802769 | -0.360976 | 4.203931  |
| 6 | -3.870116 | 1.085011  | -4.013877 |
| 6 | -4.006569 | 2.388450  | -3.418208 |
| 6 | -4.078918 | -2.945621 | 3.018579  |
| 6 | -4.218378 | -3.776250 | 1.851819  |
| 6 | -4.284407 | 4.038688  | -1.103320 |
| 6 | -4.425067 | 4.176368  | 0.322931  |
| 6 | -4.500355 | -4.054219 | -0.978100 |
| 6 | -4.640119 | -3.468299 | -2.286700 |
| 6 | -4.706997 | 3.012779  | 2.917911  |
| 6 | -4.844903 | 1.858541  | 3.772035  |
| 6 | -4.915736 | -1.177140 | -3.972100 |
| 6 | -5.050496 | 0.249450  | -4.145807 |
| 6 | -5.120106 | -0.963203 | 4.114917  |
| 6 | -5.257096 | -2.288905 | 3.555420  |
| 6 | -5.322929 | 2.868988  | -3.044303 |
| 6 | -5.460479 | 3.738598  | -1.897116 |
| 6 | -5.535303 | -4.001828 | 1.290409  |

|   |            |           |           |
|---|------------|-----------|-----------|
| 6 | -5.675085  | -4.182788 | -0.139983 |
| 6 | -5.741231  | 4.089404  | 0.920543  |
| 6 | -5.880196  | 3.533296  | 2.251386  |
| 6 | -5.954051  | -3.093851 | -2.762832 |
| 6 | -6.090474  | -1.955212 | -3.648426 |
| 6 | -6.155697  | 1.297398  | 4.004232  |
| 6 | -6.293202  | -0.129374 | 4.222031  |
| 6 | -6.360013  | 0.854346  | -4.071844 |
| 6 | -6.496166  | 2.200425  | -3.553739 |
| 6 | -6.566759  | -2.772277 | 3.192235  |
| 6 | -6.704429  | -3.672967 | 2.066677  |
| 6 | -6.771340  | 3.974358  | -1.341267 |
| 6 | -6.910331  | 4.189172  | 0.081656  |
| 6 | -6.985183  | -4.101976 | -0.737222 |
| 6 | -7.125332  | -3.587821 | -2.078161 |
| 6 | -7.192046  | 3.160451  | 2.727579  |
| 6 | -7.328671  | 2.055951  | 3.641006  |
| 6 | -7.401819  | -1.393274 | -3.880206 |
| 6 | -7.535400  | 0.016523  | -4.133024 |
| 6 | -7.606386  | -0.735017 | 4.155979  |
| 6 | -7.741905  | -2.078289 | 3.673217  |
| 6 | -7.810266  | 2.695694  | -3.197662 |
| 6 | -7.946830  | 3.617085  | -2.108192 |
| 6 | -8.021557  | -3.913213 | 1.511834  |
| 6 | -8.162414  | -4.165891 | 0.109973  |
| 6 | -8.229628  | 4.118462  | 0.681106  |
| 6 | -8.369212  | 3.638677  | 2.022846  |
| 6 | -8.445041  | -3.228151 | -2.564751 |
| 6 | -8.581674  | -2.153035 | -3.500698 |
| 6 | -8.650411  | 1.502890  | 3.897381  |
| 6 | -8.794061  | 0.105519  | 4.211706  |
| 6 | -8.855806  | 0.626950  | -4.087591 |
| 6 | -8.997359  | 1.997485  | -3.668502 |
| 6 | -9.069257  | -2.588270 | 3.349761  |
| 6 | -9.206242  | -3.558219 | 2.278886  |
| 6 | -9.274170  | 3.895765  | -1.574016 |
| 6 | -9.412981  | 4.190912  | -0.158809 |
| 6 | -9.486907  | -4.136828 | -0.488569 |
| 6 | -9.628491  | -3.695958 | -1.865282 |
| 6 | -9.689888  | 3.311008  | 2.525778  |
| 6 | -9.818284  | 2.252545  | 3.509431  |
| 6 | -9.899990  | -1.617870 | -3.778628 |
| 6 | -10.025095 | -0.213763 | -4.119792 |
| 6 | -10.113025 | -0.498193 | 4.243435  |
| 6 | -10.237573 | -1.922896 | 3.852700  |
| 6 | -10.315436 | 2.538533  | -3.396493 |
| 6 | -10.440899 | 3.572043  | -2.345033 |
| 6 | -10.510676 | -3.886166 | 1.770597  |
| 6 | -10.651175 | -4.225345 | 0.349852  |
| 6 | -10.720955 | 4.203632  | 0.445042  |
| 6 | -10.861735 | 3.781480  | 1.836962  |
| 6 | -10.937348 | -3.401138 | -2.390852 |
| 6 | -11.075020 | -2.359435 | -3.401727 |
| 6 | -11.125114 | 1.721354  | 3.823021  |
| 6 | -11.243536 | 0.369770  | 4.244054  |
| 6 | -11.331463 | 0.406149  | -4.133231 |
| 6 | -11.448027 | 1.787504  | -3.832816 |
| 6 | -11.512649 | -2.542598 | 3.575743  |
| 6 | -11.643964 | -3.501642 | 2.583653  |
| 6 | -11.719814 | 3.966378  | -1.794694 |
| 6 | -11.854482 | 4.285819  | -0.455188 |
| 6 | -11.938399 | -4.280233 | -0.316245 |
| 6 | -12.074706 | -3.899978 | -1.636985 |
| 6 | -12.156765 | 3.474862  | 2.434819  |
| 6 | -12.285114 | 2.502171  | 3.399515  |
| 6 | -12.369469 | -1.798485 | -3.779373 |
| 6 | -12.494249 | -0.480453 | -4.149979 |
| 1 | 13.486707  | 0.043725  | -4.332368 |
| 1 | 13.269117  | 2.416615  | -3.672247 |
| 1 | 13.279471  | -2.209049 | 3.766197  |

|   |            |           |           |
|---|------------|-----------|-----------|
| 1 | 13.055772  | -3.960898 | 2.036704  |
| 1 | 13.077663  | 3.845106  | -2.080709 |
| 1 | 12.835660  | 4.521035  | 0.266751  |
| 1 | 12.856584  | -4.465002 | -0.043671 |
| 1 | 12.619072  | -3.898669 | -2.419037 |
| 1 | 12.646098  | 3.862301  | 2.316313  |
| 1 | 12.414877  | 2.165856  | 4.072785  |
| 1 | 12.456276  | -2.204484 | -3.707985 |
| 1 | 12.252756  | 0.053228  | 4.338031  |
| 1 | -12.252760 | -0.051575 | 4.337877  |
| 1 | -12.456283 | 2.203026  | -3.708743 |
| 1 | -12.414885 | -2.164281 | 4.073581  |
| 1 | -12.646100 | -3.861405 | 2.317765  |
| 1 | -12.619074 | 3.897743  | -2.420521 |
| 1 | -12.856577 | 4.465011  | -0.045377 |
| 1 | -12.835652 | -4.520980 | 0.268478  |
| 1 | -13.077657 | -3.845949 | -2.079244 |
| 1 | -13.055765 | 3.961743  | 2.035198  |
| 1 | -13.279474 | 2.210518  | 3.765327  |
| 1 | -13.269114 | -2.418050 | -3.671318 |
| 1 | -13.486711 | -0.045403 | -4.332324 |

Nanotube (7,5) u10v02  
B3LYP/STO-3G Energy: -9200.016591

|   |           |           |           |
|---|-----------|-----------|-----------|
| 6 | 12.635642 | -0.613063 | -4.052217 |
| 6 | 12.509782 | 0.755587  | -4.039657 |
| 6 | 12.355838 | -1.524096 | 4.011345  |
| 6 | 12.234122 | -2.714707 | 3.333133  |
| 6 | 12.200450 | 3.342341  | -2.520998 |
| 6 | 12.053505 | 4.053428  | -1.346576 |
| 6 | 11.955568 | -4.252256 | 0.752289  |
| 6 | 11.833144 | -4.293198 | -0.624900 |
| 6 | 11.732379 | 4.059089  | 1.653791  |
| 6 | 11.590599 | 3.392322  | 2.860087  |
| 6 | 11.583092 | -2.719793 | -3.162293 |
| 6 | 11.471224 | -1.465532 | -3.813933 |
| 6 | 11.310686 | 0.753962  | 4.260485  |
| 6 | 11.193429 | -0.660103 | 4.205947  |
| 6 | 11.212912 | 1.394752  | -3.831730 |
| 6 | 11.068478 | 2.663215  | -3.128796 |
| 6 | 10.943554 | -3.167178 | 2.824177  |
| 6 | 10.814275 | -3.937647 | 1.590049  |
| 6 | 10.760188 | 4.173309  | -0.700286 |
| 6 | 10.606779 | 4.216672  | 0.757718  |
| 6 | 10.559583 | -4.055688 | -1.270553 |
| 6 | 10.444904 | -3.332453 | -2.555574 |
| 6 | 10.311765 | 2.864587  | 3.277374  |
| 6 | 10.181091 | 1.591500  | 4.024464  |
| 6 | 10.165422 | -0.864595 | -3.974703 |
| 6 | 10.039605 | 0.579602  | -4.012826 |
| 6 | 9.888010  | -1.255573 | 4.030935  |
| 6 | 9.766319  | -2.533978 | 3.356543  |
| 6 | 9.755446  | 3.084475  | -2.710024 |
| 6 | 9.602865  | 3.869124  | -1.497279 |
| 6 | 9.511474  | -4.084016 | 0.992278  |
| 6 | 9.385522  | -4.168382 | -0.452141 |
| 6 | 9.297243  | 4.032569  | 1.322546  |
| 6 | 9.149014  | 3.375596  | 2.608266  |
| 6 | 9.130298  | -2.882503 | -2.971612 |
| 6 | 8.994532  | -1.668616 | -3.734974 |
| 6 | 8.861521  | 0.999837  | 4.140402  |
| 6 | 8.718139  | -0.431470 | 4.199940  |
| 6 | 8.720068  | 1.167889  | -3.895744 |
| 6 | 8.577388  | 2.449900  | -3.273669 |
| 6 | 8.449739  | -2.982293 | 2.944997  |
| 6 | 8.321213  | -3.795594 | 1.773612  |
| 6 | 8.273626  | 4.052704  | -0.938853 |

|   |          |           |           |
|---|----------|-----------|-----------|
| 6 | 8.120217 | 4.174326  | 0.479008  |
| 6 | 8.063725 | -4.039394 | -1.052254 |
| 6 | 7.938020 | -3.434307 | -2.345326 |
| 6 | 7.818280 | 2.966650  | 3.041561  |
| 6 | 7.675846 | 1.795973  | 3.856501  |
| 6 | 7.675588 | -1.091877 | -3.949204 |
| 6 | 7.542026 | 0.334547  | -4.073724 |
| 6 | 7.397663 | -1.032866 | 4.084495  |
| 6 | 7.267104 | -2.337001 | 3.489746  |
| 6 | 7.254055 | 2.923052  | -2.908974 |
| 6 | 7.103399 | 3.768881  | -1.750530 |
| 6 | 7.007013 | -4.020820 | 1.201499  |
| 6 | 6.880753 | -4.184832 | -0.228692 |
| 6 | 6.797637 | 4.086285  | 1.065697  |
| 6 | 6.648263 | 3.510630  | 2.385273  |
| 6 | 6.627562 | -3.049737 | -2.829769 |
| 6 | 6.497781 | -1.885811 | -3.681761 |
| 6 | 6.360541 | 1.227600  | 4.066203  |
| 6 | 6.222247 | -0.206168 | 4.226687  |
| 6 | 6.229249 | 0.936747  | -4.007917 |
| 6 | 6.087271 | 2.266761  | -3.451589 |
| 6 | 5.958505 | -2.822190 | 3.115739  |
| 6 | 5.830468 | -3.706550 | 1.975343  |
| 6 | 5.788152 | 4.002751  | -1.206757 |
| 6 | 5.635750 | 4.201491  | 0.219946  |
| 6 | 5.575148 | -4.103839 | -0.838524 |
| 6 | 5.448789 | -3.563683 | -2.174075 |
| 6 | 5.334486 | 3.138515  | 2.850627  |
| 6 | 5.189781 | 2.004303  | 3.735206  |
| 6 | 5.189895 | -1.322068 | -3.922386 |
| 6 | 5.055853 | 0.100629  | -4.127734 |
| 6 | 4.912494 | -0.809152 | 4.137290  |
| 6 | 4.780269 | -2.146688 | 3.612788  |
| 6 | 4.770284 | 2.752037  | -3.101475 |
| 6 | 4.620670 | 3.659580  | -1.992531 |
| 6 | 4.519896 | -3.947995 | 1.409635  |
| 6 | 4.392061 | -4.187631 | -0.004403 |
| 6 | 4.314135 | 4.129995  | 0.809085  |
| 6 | 4.162717 | 3.632115  | 2.150688  |
| 6 | 4.136766 | -3.198116 | -2.671654 |
| 6 | 4.007105 | -2.094932 | -3.587125 |
| 6 | 3.870751 | 1.445308  | 3.965575  |
| 6 | 3.731506 | 0.033793  | 4.211568  |
| 6 | 3.738195 | 0.706681  | -4.081300 |
| 6 | 3.596045 | 2.058209  | -3.603075 |
| 6 | 3.465395 | -2.645920 | 3.254814  |
| 6 | 3.335921 | -3.586097 | 2.169547  |
| 6 | 3.297677 | 3.920356  | -1.457241 |
| 6 | 3.144755 | 4.198923  | -0.049544 |
| 6 | 3.080222 | -4.139933 | -0.620313 |
| 6 | 2.953064 | -3.679050 | -1.983299 |
| 6 | 2.841999 | 3.288520  | 2.639713  |
| 6 | 2.695916 | 2.209435  | 3.590716  |
| 6 | 2.695016 | -1.547112 | -3.864348 |
| 6 | 2.561523 | -0.136551 | -4.156912 |
| 6 | 2.418088 | -0.573737 | 4.162769  |
| 6 | 2.285760 | -1.945013 | 3.718063  |
| 6 | 2.279693 | 2.567888  | -3.286561 |
| 6 | 2.131520 | 3.542092  | -2.225473 |
| 6 | 2.027693 | -3.864877 | 1.621045  |
| 6 | 1.900513 | -4.184073 | 0.214650  |
| 6 | 1.827558 | 4.169169  | 0.542368  |
| 6 | 1.675869 | 3.745268  | 1.918392  |
| 6 | 1.646455 | -3.348472 | -2.502545 |
| 6 | 1.517511 | -2.295433 | -3.486201 |
| 6 | 1.383131 | 1.669359  | 3.855506  |
| 6 | 1.243481 | 0.268392  | 4.185758  |
| 6 | 1.250670 | 0.469954  | -4.144395 |
| 6 | 1.109914 | 1.850594  | -3.742945 |
| 6 | 0.977258 | -2.460184 | 3.386869  |

|   |           |           |           |
|---|-----------|-----------|-----------|
| 6 | 0.847796  | -3.460307 | 2.354038  |
| 6 | 0.814154  | 3.828820  | -1.704754 |
| 6 | 0.661467  | 4.184309  | -0.315557 |
| 6 | 0.592340  | -4.165150 | -0.401554 |
| 6 | 0.464517  | -3.781701 | -1.784894 |
| 6 | 0.357115  | 3.425138  | 2.420904  |
| 6 | 0.209277  | 2.406288  | 3.428192  |
| 6 | 0.205505  | -1.761078 | -3.787180 |
| 6 | 0.071754  | -0.376776 | -4.160710 |
| 6 | -0.071750 | -0.339748 | 4.163899  |
| 6 | -0.205502 | -1.727317 | 3.802694  |
| 6 | -0.209275 | 2.375695  | -3.449445 |
| 6 | -0.357115 | 3.403464  | -2.451260 |
| 6 | -0.464518 | -3.765670 | 1.818461  |
| 6 | -0.592342 | -4.161415 | 0.438589  |
| 6 | -0.661470 | 4.186944  | 0.278334  |
| 6 | -0.814153 | 3.843832  | 1.670640  |
| 6 | -0.847796 | -3.481111 | -2.323165 |
| 6 | -0.977255 | -2.490214 | -3.364850 |
| 6 | -1.109910 | 1.883819  | 3.726349  |
| 6 | -1.250667 | 0.506803  | 4.140061  |
| 6 | -1.243477 | 0.231145  | -4.187971 |
| 6 | -1.383126 | 1.634992  | -3.870191 |
| 6 | -1.517510 | -2.264325 | 3.506475  |
| 6 | -1.646458 | -3.326072 | 2.532225  |
| 6 | -1.675871 | 3.728047  | -1.951619 |
| 6 | -1.827562 | 4.164174  | -0.579421 |
| 6 | -1.900515 | -4.185815 | -0.177423 |
| 6 | -2.027693 | -3.879145 | -1.586603 |
| 6 | -2.131520 | 3.561747  | 2.193887  |
| 6 | -2.279691 | 2.597024  | 3.263601  |
| 6 | -2.285756 | -1.978012 | -3.700614 |
| 6 | -2.418083 | -0.610747 | -4.157502 |
| 6 | -2.561522 | -0.099565 | 4.157963  |
| 6 | -2.695017 | -1.512671 | 3.877952  |
| 6 | -2.695914 | 2.177397  | -3.610215 |
| 6 | -2.842000 | 3.264896  | -2.668846 |
| 6 | -2.953069 | -3.661255 | 2.015942  |
| 6 | -3.080227 | -4.134250 | 0.657112  |
| 6 | -3.144760 | 4.199190  | 0.012202  |
| 6 | -3.297680 | 3.933165  | 1.422322  |
| 6 | -3.335921 | -3.605256 | -2.137563 |
| 6 | -3.465392 | -2.674773 | -3.231153 |
| 6 | -3.596044 | 2.090184  | 3.584638  |
| 6 | -3.738193 | 0.742964  | 4.074861  |
| 6 | -3.731501 | -0.003675 | -4.211710 |
| 6 | -3.870748 | 1.409969  | -3.978274 |
| 6 | -4.007109 | -2.062929 | 3.605610  |
| 6 | -4.136773 | -3.174214 | 2.699987  |
| 6 | -4.162721 | 3.612823  | -2.182898 |
| 6 | -4.314141 | 4.122619  | -0.845779 |
| 6 | -4.392067 | -4.187429 | 0.041646  |
| 6 | -4.519899 | -3.960382 | -1.374469 |
| 6 | -4.620673 | 3.677165  | 1.959912  |
| 6 | -4.770282 | 2.779525  | 3.076890  |
| 6 | -4.780264 | -2.178747 | -3.593562 |
| 6 | -4.912486 | -0.845931 | -4.129941 |
| 6 | -5.055851 | 0.137348  | 4.126690  |
| 6 | -5.189896 | -1.287116 | 3.933984  |
| 6 | -5.189779 | 1.970986  | -3.752886 |
| 6 | -5.334488 | 3.113017  | -2.878422 |
| 6 | -5.448798 | -3.544190 | 2.205676  |
| 6 | -5.575157 | -4.096209 | 0.874986  |
| 6 | -5.635756 | 4.199360  | -0.257297 |
| 6 | -5.788158 | 4.013322  | 1.171117  |
| 6 | -5.830469 | -3.723981 | -1.942308 |
| 6 | -5.958500 | -2.849802 | -3.090531 |
| 6 | -6.087268 | 2.297386  | 3.431315  |
| 6 | -6.229244 | 0.972373  | 3.999446  |
| 6 | -6.222239 | -0.243764 | -4.224711 |



|   |            |           |           |
|---|------------|-----------|-----------|
| 6 | -6.360537  | 1.191371  | -4.076964 |
| 6 | -6.497784  | -1.852973 | 3.698379  |
| 6 | -6.627572  | -3.024422 | 2.856763  |
| 6 | -6.648267  | 3.489250  | -2.416394 |
| 6 | -6.797643  | 4.076615  | -1.101989 |
| 6 | -6.880762  | -4.182628 | 0.265891  |
| 6 | -7.007018  | -4.031343 | -1.165703 |
| 6 | -7.103404  | 3.784302  | 1.716954  |
| 6 | -7.254054  | 2.948822  | 2.882888  |
| 6 | -7.267097  | -2.367961 | -3.468850 |
| 6 | -7.397653  | -1.069168 | -4.075173 |
| 6 | -7.542019  | 0.370781  | 4.070620  |
| 6 | -7.675586  | -1.056692 | 3.958765  |
| 6 | -7.675842  | 1.761584  | -3.872329 |
| 6 | -7.818282  | 2.939452  | -3.067818 |
| 6 | -7.938031  | -3.413275 | 2.375754  |
| 6 | -8.063738  | -4.029846 | 1.088119  |
| 6 | -8.120224  | 4.169873  | -0.516104 |
| 6 | -8.273632  | 4.060874  | 0.902784  |
| 6 | -8.321214  | -3.811221 | -1.739806 |
| 6 | -8.449734  | -3.008382 | -2.918387 |
| 6 | -8.577384  | 2.478935  | 3.251790  |
| 6 | -8.720061  | 1.202510  | 3.885248  |
| 6 | -8.718127  | -0.468822 | -4.195969 |
| 6 | -8.861513  | 0.962957  | -4.149155 |
| 6 | -8.994531  | -1.635306 | 3.749668  |
| 6 | -9.130307  | -2.855911 | 2.997103  |
| 6 | -9.149018  | 3.352225  | -2.638173 |
| 6 | -9.297250  | 4.020603  | -1.358346 |
| 6 | -9.385535  | -4.164160 | 0.489174  |
| 6 | -9.511481  | -4.092667 | -0.955941 |
| 6 | -9.602869  | 3.882270  | 1.462827  |
| 6 | -9.755444  | 3.108462  | 2.682517  |
| 6 | -9.766310  | -2.563748 | -3.333916 |
| 6 | -9.887996  | -1.291392 | -4.019658 |
| 6 | -10.039596 | 0.615290  | 4.007565  |
| 6 | -10.165417 | -0.829187 | 3.982274  |
| 6 | -10.181085 | 1.555623  | -4.038476 |
| 6 | -10.311769 | 2.835291  | -3.302718 |
| 6 | -10.444915 | -3.309523 | 2.585077  |
| 6 | -10.559598 | -4.044157 | 1.306544  |
| 6 | -10.606786 | 4.209708  | -0.795177 |
| 6 | -10.760194 | 4.179333  | 0.663155  |
| 6 | -10.814278 | -3.951623 | -1.555003 |
| 6 | -10.943548 | -3.192185 | -2.795948 |
| 6 | -11.068473 | 2.690945  | 3.105031  |
| 6 | -11.212904 | 1.428797  | 3.819241  |
| 6 | -11.193410 | -0.697505 | -4.199967 |
| 6 | -11.310673 | 0.716021  | -4.267082 |
| 6 | -11.471223 | -1.431525 | 3.826850  |
| 6 | -11.583100 | -2.691499 | 3.186339  |
| 6 | -11.590602 | 3.366710  | -2.890139 |
| 6 | -11.732385 | 4.044165  | -1.689811 |
| 6 | -11.833158 | -4.287394 | 0.663024  |
| 6 | -11.955575 | -4.258739 | -0.714474 |
| 6 | -12.053511 | 4.065201  | 1.310490  |
| 6 | -12.200450 | 3.364615  | 2.491204  |
| 6 | -12.234114 | -2.744270 | -3.308941 |
| 6 | -12.355819 | -1.559738 | -3.997726 |
| 6 | -12.509770 | 0.791513  | 4.032876  |
| 6 | -12.635634 | -0.576970 | 4.057596  |
| 1 | 13.628860  | -1.080105 | -4.107165 |
| 1 | 13.409357  | 1.382633  | -4.090160 |
| 1 | 13.347522  | -1.146561 | 4.297425  |
| 1 | 13.135533  | -3.288884 | 3.082647  |
| 1 | 13.207112  | 3.175816  | -2.925506 |
| 1 | 12.945912  | 4.439452  | -0.837149 |
| 1 | 12.953612  | -4.319986 | 1.203857  |
| 1 | 12.737595  | -4.391689 | -1.239148 |
| 1 | 12.737223  | 4.339790  | 1.313009  |

|   |            |           |           |
|---|------------|-----------|-----------|
| 1 | 12.487428  | 3.159234  | 3.448641  |
| 1 | 12.589369  | -3.087789 | -2.924336 |
| 1 | 12.319624  | 1.186199  | 4.248935  |
| 1 | -12.319602 | 1.148329  | -4.259364 |
| 1 | -12.589387 | -3.061601 | 2.951661  |
| 1 | -12.487433 | 3.128409  | -3.476599 |
| 1 | -12.737233 | 4.327877  | -1.351534 |
| 1 | -12.737617 | -4.380393 | 1.278116  |
| 1 | -12.953624 | -4.330473 | -1.165422 |
| 1 | -12.945921 | 4.446656  | 0.797637  |
| 1 | -13.207113 | 3.201694  | 2.897177  |
| 1 | -13.135523 | -3.316209 | -3.053383 |
| 1 | -13.347490 | -1.184776 | -4.287194 |
| 1 | -13.409341 | 1.418983  | 4.077836  |
| 1 | -13.628852 | -1.043503 | 4.116717  |

Nanotube (7,5) ul0v03  
B3LYP/STO-3G Energy: -9275.311666

|   |           |           |           |
|---|-----------|-----------|-----------|
| 6 | 12.709530 | -3.847864 | 1.596378  |
| 6 | 12.578182 | -4.180196 | 0.269271  |
| 6 | 12.497204 | 4.191828  | 0.451176  |
| 6 | 12.374615 | 3.836049  | 1.774166  |
| 6 | 12.270983 | -3.358751 | -2.615598 |
| 6 | 12.131066 | -2.399047 | -3.598146 |
| 6 | 12.081974 | 1.725897  | 3.910336  |
| 6 | 11.949060 | 0.404321  | 4.295718  |
| 6 | 11.834704 | 0.506938  | -4.355736 |
| 6 | 11.705143 | 1.843227  | -4.013877 |
| 6 | 11.672793 | -2.445192 | 3.411687  |
| 6 | 11.550448 | -3.391039 | 2.363188  |
| 6 | 11.445800 | 3.866661  | -1.814194 |
| 6 | 11.333031 | 4.171549  | -0.432445 |
| 6 | 11.280256 | -4.128152 | -0.399432 |
| 6 | 11.136492 | -3.765964 | -1.803120 |
| 6 | 11.081578 | 3.467461  | 2.342049  |
| 6 | 10.945718 | 2.467749  | 3.397342  |
| 6 | 10.842451 | -1.791528 | -3.873934 |
| 6 | 10.700956 | -0.390315 | -4.281452 |
| 6 | 10.669264 | -0.269557 | 4.230343  |
| 6 | 10.541525 | -1.693556 | 3.854184  |
| 6 | 10.431280 | 2.391328  | -3.606597 |
| 6 | 10.310958 | 3.436272  | -2.563598 |
| 6 | 10.240687 | -3.687204 | 1.824898  |
| 6 | 10.108590 | -4.087525 | 0.437515  |
| 6 | 10.028222 | 4.163577  | 0.190076  |
| 6 | 9.905913  | 3.833844  | 1.597183  |
| 6 | 9.825148  | -3.454862 | -2.314014 |
| 6 | 9.679591  | -2.476735 | -3.377877 |
| 6 | 9.638755  | 1.937115  | 3.691859  |
| 6 | 9.501948  | 0.561250  | 4.136660  |
| 6 | 9.396691  | 0.214290  | -4.243928 |
| 6 | 9.261277  | 1.625357  | -3.931550 |
| 6 | 9.221968  | -2.198519 | 3.526772  |
| 6 | 9.075119  | -3.242289 | 2.544767  |
| 6 | 8.994651  | 3.709545  | -2.018598 |
| 6 | 8.856802  | 4.129445  | -0.648190 |
| 6 | 8.787862  | -4.110779 | -0.158890 |
| 6 | 8.645102  | -3.830177 | -1.556078 |
| 6 | 8.588107  | 3.559356  | 2.136700  |
| 6 | 8.453648  | 2.630992  | 3.218562  |
| 6 | 8.354571  | -1.970510 | -3.693631 |
| 6 | 8.212483  | -0.627376 | -4.167394 |
| 6 | 8.175365  | -0.040671 | 4.165197  |
| 6 | 8.037074  | -1.443055 | 3.905181  |
| 6 | 7.935869  | 2.159290  | -3.643011 |
| 6 | 7.804003  | 3.243925  | -2.715457 |
| 6 | 7.752325  | -3.583184 | 2.042995  |

|   |          |           |           |
|---|----------|-----------|-----------|
| 6 | 7.611744 | -4.061888 | 0.694644  |
| 6 | 7.537720 | 4.179870  | -0.034949 |
| 6 | 7.407140 | 3.933697  | 1.376605  |
| 6 | 7.322909 | -3.583806 | -2.103216 |
| 6 | 7.178572 | -2.674283 | -3.212540 |
| 6 | 7.135792 | 2.144707  | 3.582305  |
| 6 | 6.999094 | 0.803513  | 4.100742  |
| 6 | 6.894953 | -0.025636 | -4.227616 |
| 6 | 6.758341 | 1.396982  | -4.002575 |
| 6 | 6.721067 | -1.997486 | 3.657487  |
| 6 | 6.579601 | -3.113621 | 2.746411  |
| 6 | 6.492154 | 3.601424  | -2.216233 |
| 6 | 6.359989 | 4.118977  | -0.869421 |
| 6 | 6.296740 | -4.138028 | 0.097563  |
| 6 | 6.153833 | -3.933324 | -1.329064 |
| 6 | 6.097108 | 3.704808  | 1.942466  |
| 6 | 5.963569 | 2.825020  | 3.085519  |
| 6 | 5.866705 | -2.195190 | -3.573758 |
| 6 | 5.725479 | -0.863290 | -4.125034 |
| 6 | 5.688382 | 0.204131  | 4.178985  |
| 6 | 5.549496 | -1.223380 | 3.992864  |
| 6 | 5.449739 | 1.952874  | -3.758480 |
| 6 | 5.316026 | 3.095901  | -2.883338 |
| 6 | 5.267555 | -3.477418 | 2.264296  |
| 6 | 5.125760 | -4.033210 | 0.939182  |
| 6 | 5.051844 | 4.195543  | -0.261442 |
| 6 | 4.920248 | 4.025701  | 1.165520  |
| 6 | 4.837942 | -3.704892 | -1.884475 |
| 6 | 4.694086 | -2.858792 | -3.042018 |
| 6 | 4.649987 | 2.349586  | 3.463992  |
| 6 | 4.512380 | 1.042487  | 4.052444  |
| 6 | 4.409466 | -0.263540 | -4.202707 |
| 6 | 4.270906 | 1.161594  | -4.058620 |
| 6 | 4.232669 | -1.785697 | 3.767256  |
| 6 | 4.091048 | -2.948029 | 2.930209  |
| 6 | 4.001203 | 3.470759  | -2.398460 |
| 6 | 3.868558 | 4.064739  | -1.094129 |
| 6 | 3.806229 | -4.128363 | 0.343476  |
| 6 | 3.662290 | -4.004262 | -1.084327 |
| 6 | 3.604545 | 3.815173  | 1.740542  |
| 6 | 3.470178 | 3.003296  | 2.923570  |
| 6 | 3.374726 | -2.394265 | -3.426721 |
| 6 | 3.232664 | -1.101546 | -4.050996 |
| 6 | 3.195683 | 0.445482  | 4.163836  |
| 6 | 3.056227 | -0.987764 | 4.061855  |
| 6 | 2.955488 | 1.733054  | -3.847528 |
| 6 | 2.820553 | 2.925550  | -3.042570 |
| 6 | 2.774269 | -3.342460 | 2.472177  |
| 6 | 2.632049 | -3.978364 | 1.181294  |
| 6 | 2.556497 | 4.180837  | -0.491904 |
| 6 | 2.425214 | 4.096578  | 0.946794  |
| 6 | 2.346031 | -3.813639 | -1.654721 |
| 6 | 2.202972 | -3.031676 | -2.864414 |
| 6 | 2.158440 | 2.553778  | 3.334063  |
| 6 | 2.022015 | 1.274997  | 3.998627  |
| 6 | 1.920398 | -0.509500 | -4.170471 |
| 6 | 1.781729 | 0.930044  | -4.107517 |
| 6 | 1.744176 | -1.562818 | 3.876563  |
| 6 | 1.602919 | -2.778615 | 3.105089  |
| 6 | 1.511700 | 3.329330  | -2.585143 |
| 6 | 1.379098 | 4.001716  | -1.311508 |
| 6 | 1.318475 | -4.106849 | 0.593899  |
| 6 | 1.175025 | -4.063898 | -0.843336 |
| 6 | 1.116134 | 3.916550  | 1.530597  |
| 6 | 0.982540 | 3.170370  | 2.759524  |
| 6 | 0.889073 | -2.588478 | -3.271581 |
| 6 | 0.747152 | -1.332921 | -3.967372 |
| 6 | 0.709827 | 0.685194  | 4.139435  |
| 6 | 0.570192 | -0.749390 | 4.118417  |
| 6 | 0.468822 | 1.508932  | -3.923751 |

|   |           |           |           |
|---|-----------|-----------|-----------|
| 6 | 0.332477  | 2.741257  | -3.190291 |
| 6 | 0.286910  | -3.192709 | 2.666727  |
| 6 | 0.143543  | -3.899444 | 1.420043  |
| 6 | 0.066078  | 4.143395  | -0.715660 |
| 6 | -0.066078 | 4.142975  | 0.718094  |
| 6 | -0.143543 | -3.898608 | -1.422333 |
| 6 | -0.286910 | -3.191141 | -2.668601 |
| 6 | -0.332477 | 2.739381  | 3.191900  |
| 6 | -0.468822 | 1.506625  | 3.924636  |
| 6 | -0.570193 | -0.746969 | -4.118855 |
| 6 | -0.709827 | 0.687627  | -4.139032 |
| 6 | -0.747152 | -1.335253 | 3.966589  |
| 6 | -0.889072 | -2.590401 | 3.270061  |
| 6 | -0.982539 | 3.171992  | -2.757662 |
| 6 | -1.116134 | 3.917450  | -1.528297 |
| 6 | -1.175025 | -4.064393 | 0.840949  |
| 6 | -1.318474 | -4.106500 | -0.596311 |
| 6 | -1.379099 | 4.000944  | 1.313858  |
| 6 | -1.511700 | 3.327810  | 2.587097  |
| 6 | -1.602919 | -2.776788 | -3.106719 |
| 6 | -1.744176 | -1.560538 | -3.877479 |
| 6 | -1.781730 | 0.927630  | 4.108062  |
| 6 | -1.920398 | -0.511951 | 4.170172  |
| 6 | -2.022014 | 1.277348  | -3.997878 |
| 6 | -2.158440 | 2.555738  | -3.332563 |
| 6 | -2.202972 | -3.033361 | 2.862635  |
| 6 | -2.346030 | -3.814613 | 1.652482  |
| 6 | -2.425213 | 4.097135  | -0.944388 |
| 6 | -2.556497 | 4.180547  | 0.494360  |
| 6 | -2.632049 | -3.977669 | -1.183629 |
| 6 | -2.774270 | -3.341005 | -2.474138 |
| 6 | -2.820554 | 2.923760  | 3.044287  |
| 6 | -2.955489 | 1.730791  | 3.848544  |
| 6 | -3.056227 | -0.985376 | -4.062433 |
| 6 | -3.195682 | 0.447930  | -4.163573 |
| 6 | -3.232663 | -1.103928 | 4.050349  |
| 6 | -3.374725 | -2.396280 | 3.425316  |
| 6 | -3.470177 | 3.005016  | -2.921807 |
| 6 | -3.604544 | 3.816198  | -1.738302 |
| 6 | -3.662290 | -4.004901 | 1.081976  |
| 6 | -3.806229 | -4.128160 | -0.345899 |
| 6 | -3.868559 | 4.064095  | 1.096515  |
| 6 | -4.001204 | 3.469347  | 2.400496  |
| 6 | -4.091049 | -2.946304 | -2.931937 |
| 6 | -4.232670 | -1.783481 | -3.768301 |
| 6 | -4.270907 | 1.159208  | 4.059300  |
| 6 | -4.409466 | -0.266012 | 4.202551  |
| 6 | -4.512379 | 1.044870  | -4.051832 |
| 6 | -4.649985 | 2.351624  | -3.462614 |
| 6 | -4.694085 | -2.860582 | 3.040341  |
| 6 | -4.837940 | -3.706002 | 1.882302  |
| 6 | -4.920247 | 4.026389  | -1.163158 |
| 6 | -5.051844 | 4.195388  | 0.263904  |
| 6 | -5.125760 | -4.032657 | -0.941548 |
| 6 | -5.267556 | -3.476083 | -2.266335 |
| 6 | -5.316028 | 3.094202  | 2.885152  |
| 6 | -5.449741 | 1.950662  | 3.759622  |
| 6 | -5.549497 | -1.221030 | -3.993578 |
| 6 | -5.688382 | 0.206589  | -4.178863 |
| 6 | -5.725479 | -0.865716 | 4.124527  |
| 6 | -5.866704 | -2.197293 | 3.572472  |
| 6 | -5.963567 | 2.826838  | -3.083863 |
| 6 | -6.097107 | 3.705954  | -1.940294 |
| 6 | -6.153831 | -3.934108 | 1.326757  |
| 6 | -6.296739 | -4.137970 | -0.099991 |
| 6 | -6.359990 | 4.118464  | 0.871837  |
| 6 | -6.492156 | 3.600116  | 2.218343  |
| 6 | -6.579603 | -3.112002 | -2.748233 |
| 6 | -6.721069 | -1.995332 | -3.658653 |
| 6 | -6.758343 | 1.394626  | 4.003391  |

|   |            |           |           |
|---|------------|-----------|-----------|
| 6 | -6.894954  | -0.028124 | 4.227600  |
| 6 | -6.999093  | 0.805927  | -4.100270 |
| 6 | -7.135790  | 2.146818  | -3.581051 |
| 6 | -7.178570  | -2.676177 | 3.210974  |
| 6 | -7.322907  | -3.585048 | 2.101116  |
| 6 | -7.407139  | 3.934512  | -1.374300 |
| 6 | -7.537720  | 4.179851  | 0.037400  |
| 6 | -7.611744  | -4.061478 | -0.697025 |
| 6 | -7.752327  | -3.581978 | -2.045093 |
| 6 | -7.804006  | 3.242322  | 2.717355  |
| 6 | -7.935872  | 2.157142  | 3.644272  |
| 6 | -8.037075  | -1.440754 | -3.906022 |
| 6 | -8.175365  | -0.038218 | -4.165219 |
| 6 | -8.212482  | -0.629830 | 4.167027  |
| 6 | -8.354569  | -1.972687 | 3.692480  |
| 6 | -8.453646  | 2.632892  | -3.217025 |
| 6 | -8.588105  | 3.560621  | -2.134618 |
| 6 | -8.645100  | -3.831098 | 1.553835  |
| 6 | -8.787861  | -4.110874 | 0.156481  |
| 6 | -8.856804  | 4.129062  | 0.650608  |
| 6 | -8.994653  | 3.708350  | 2.020767  |
| 6 | -9.075121  | -3.240785 | -2.546662 |
| 6 | -9.221970  | -2.196438 | -3.528053 |
| 6 | -9.261279  | 1.623038  | 3.932497  |
| 6 | -9.396692  | 0.211789  | 4.244052  |
| 6 | -9.501947  | 0.563688  | -4.136332 |
| 6 | -9.638753  | 1.939294  | -3.690730 |
| 6 | -9.679589  | -2.478731 | 3.376431  |
| 6 | -9.825145  | -3.456233 | 2.311994  |
| 6 | -9.905912  | 3.834792  | -1.594941 |
| 6 | -10.028222 | 4.163690  | -0.187639 |
| 6 | -10.108591 | -4.087266 | -0.439909 |
| 6 | -10.240689 | -3.686122 | -1.827053 |
| 6 | -10.310961 | 3.434753  | 2.565603  |
| 6 | -10.431283 | 2.389196  | 3.607988  |
| 6 | -10.541527 | -1.691280 | -3.855167 |
| 6 | -10.669264 | -0.267063 | -4.230498 |
| 6 | -10.700956 | -0.392840 | 4.281222  |
| 6 | -10.842449 | -1.793816 | 3.872890  |
| 6 | -10.945715 | 2.469758  | -3.395906 |
| 6 | -11.081575 | 3.468850  | -2.340026 |
| 6 | -11.136489 | -3.767037 | 1.800919  |
| 6 | -11.280255 | -4.128391 | 0.397017  |
| 6 | -11.333033 | 4.171289  | 0.434884  |
| 6 | -11.445804 | 3.865579  | 1.816452  |
| 6 | -11.550450 | -3.389636 | -2.365165 |
| 6 | -11.672796 | -2.443171 | -3.413106 |
| 6 | -11.705146 | 1.840855  | 4.014943  |
| 6 | -11.834706 | 0.504367  | 4.356024  |
| 6 | -11.949058 | 0.406856  | -4.295487 |
| 6 | -12.081971 | 1.728207  | -3.909337 |
| 6 | -12.131063 | -2.401180 | 3.596752  |
| 6 | -12.270979 | -3.360307 | 2.613642  |
| 6 | -12.374614 | 3.837102  | -1.771927 |
| 6 | -12.497205 | 4.192094  | -0.448726 |
| 6 | -12.578182 | -4.180035 | -0.271714 |
| 6 | -12.709532 | -3.846912 | -1.598624 |
| 1 | 13.703986  | -3.792373 | 2.060547  |
| 1 | 13.474545  | -4.396053 | -0.326451 |
| 1 | 13.489407  | 4.365943  | 0.012201  |
| 1 | 13.275954  | 3.731088  | 2.391831  |
| 1 | 13.274638  | -3.718189 | -2.354907 |
| 1 | 13.025990  | -2.011143 | -4.101698 |
| 1 | 13.083564  | 2.171893  | 3.861123  |
| 1 | 12.848904  | -0.173294 | 4.544068  |
| 1 | 12.835622  | 0.097506  | -4.543283 |
| 1 | 12.607378  | 2.463882  | -3.937947 |
| 1 | 12.682302  | -2.130618 | 3.705626  |
| 1 | 12.452863  | 3.737706  | -2.231023 |
| 1 | -12.452865 | 3.736376  | 2.233202  |

|   |            |           |           |
|---|------------|-----------|-----------|
| 1 | -12.682304 | -2.128421 | -3.706857 |
| 1 | -12.607383 | 2.461552  | 3.939369  |
| 1 | -12.835624 | 0.094823  | 4.543327  |
| 1 | -12.848903 | -0.170612 | -4.544177 |
| 1 | -13.083560 | 2.174178  | -3.859869 |
| 1 | -13.025986 | -2.013578 | 4.100537  |
| 1 | -13.274633 | -3.719600 | 2.352746  |
| 1 | -13.275951 | 3.732508  | -2.389657 |
| 1 | -13.489408 | 4.365947  | -0.009649 |
| 1 | -13.474545 | -4.396244 | 0.323881  |
| 1 | -13.703989 | -3.791142 | -2.062757 |

Nanotube (7,5) u10v04  
B3LYP/STO-3G Energy: -9350.606631

|   |           |           |           |
|---|-----------|-----------|-----------|
| 6 | 12.829523 | 3.238522  | -2.563992 |
| 6 | 12.707643 | 3.901510  | -1.366429 |
| 6 | 12.571588 | -4.236557 | 0.603382  |
| 6 | 12.443428 | -4.231861 | -0.765916 |
| 6 | 12.411107 | 3.851892  | 1.633939  |
| 6 | 12.270589 | 3.177707  | 2.830210  |
| 6 | 12.152236 | -2.737867 | -3.370694 |
| 6 | 12.025873 | -1.558244 | -4.081029 |
| 6 | 11.960448 | 0.564836  | 4.307753  |
| 6 | 11.820677 | -0.813155 | 4.319729  |
| 6 | 11.773590 | 1.424941  | -3.954666 |
| 6 | 11.663233 | 2.608553  | -3.183444 |
| 6 | 11.535849 | -3.331168 | 2.713106  |
| 6 | 11.412827 | -3.979747 | 1.456984  |
| 6 | 11.413045 | 4.032709  | -0.701762 |
| 6 | 11.274616 | 4.044684  | 0.747855  |
| 6 | 11.149409 | -4.010588 | -1.404282 |
| 6 | 11.013905 | -3.314398 | -2.679759 |
| 6 | 10.979562 | 2.670347  | 3.257202  |
| 6 | 10.831638 | 1.421872  | 4.010375  |
| 6 | 10.750758 | -0.879771 | -4.185199 |
| 6 | 10.634605 | 0.593514  | -4.185723 |
| 6 | 10.540810 | -1.437830 | 4.071252  |
| 6 | 10.407838 | -2.713815 | 3.331800  |
| 6 | 10.358259 | 3.043237  | -2.734378 |
| 6 | 10.236316 | 3.787468  | -1.496128 |
| 6 | 10.104203 | -4.122027 | 0.858555  |
| 6 | 9.975561  | -4.164190 | -0.585342 |
| 6 | 9.963986  | 3.885423  | 1.326519  |
| 6 | 9.818080  | 3.214450  | 2.606414  |
| 6 | 9.708619  | -2.866940 | -3.095616 |
| 6 | 9.578359  | -1.650021 | -3.877730 |
| 6 | 9.523339  | 0.837713  | 4.134463  |
| 6 | 9.377408  | -0.605337 | 4.194483  |
| 6 | 9.320366  | 1.175919  | -3.994142 |
| 6 | 9.185873  | 2.437821  | -3.311988 |
| 6 | 9.086805  | -3.108122 | 2.880878  |
| 6 | 8.938086  | -3.864873 | 1.664694  |
| 6 | 8.919255  | 3.973512  | -0.920968 |
| 6 | 8.782281  | 4.062309  | 0.502045  |
| 6 | 8.656610  | -4.027298 | -1.171950 |
| 6 | 8.521826  | -3.406758 | -2.455469 |
| 6 | 8.491921  | 2.816121  | 3.046379  |
| 6 | 8.344132  | 1.640477  | 3.849277  |
| 6 | 8.255919  | -1.065172 | -4.054381 |
| 6 | 8.128496  | 0.357983  | -4.161789 |
| 6 | 8.047391  | -1.185311 | 4.057636  |
| 6 | 7.903347  | -2.470161 | 3.439671  |
| 6 | 7.868377  | 2.906241  | -2.909573 |
| 6 | 7.738181  | 3.715787  | -1.728988 |
| 6 | 7.615272  | -4.060665 | 1.090216  |
| 6 | 7.477678  | -4.184113 | -0.336249 |
| 6 | 7.461551  | 3.974262  | 1.098930  |

|   |          |           |           |
|---|----------|-----------|-----------|
| 6 | 7.317449 | 3.381337  | 2.404649  |
| 6 | 7.205018 | -3.019359 | -2.926273 |
| 6 | 7.074171 | -1.855480 | -3.770622 |
| 6 | 7.023077 | 1.083995  | 4.066504  |
| 6 | 6.876371 | -0.347022 | 4.214312  |
| 6 | 6.817513 | 0.967724  | -4.059564 |
| 6 | 6.688460 | 2.280807  | -3.464973 |
| 6 | 6.586156 | -2.933930 | 3.054152  |
| 6 | 6.442568 | -3.778374 | 1.886275  |
| 6 | 6.426766 | 3.952784  | -1.166577 |
| 6 | 6.290076 | 4.122195  | 0.264950  |
| 6 | 6.165472 | -4.097884 | -0.936670 |
| 6 | 6.030781 | -3.540242 | -2.266505 |
| 6 | 6.004305 | 3.020900  | 2.881722  |
| 6 | 5.857836 | 1.876450  | 3.757076  |
| 6 | 5.766896 | -1.285955 | -3.995259 |
| 6 | 5.638750 | 0.142536  | -4.181347 |
| 6 | 5.562944 | -0.937230 | 4.126862  |
| 6 | 5.417102 | -2.265642 | 3.574831  |
| 6 | 5.381641 | 2.766740  | -3.088046 |
| 6 | 5.250593 | 3.644971  | -1.949207 |
| 6 | 5.130472 | -3.998795 | 1.323828  |
| 6 | 4.991163 | -4.199679 | -0.098629 |
| 6 | 4.975942 | 4.054015  | 0.865116  |
| 6 | 4.832942 | 3.534352  | 2.201787  |
| 6 | 4.718314 | -3.167616 | -2.749074 |
| 6 | 4.586077 | -2.054296 | -3.653179 |
| 6 | 4.539020 | 1.326641  | 3.991271  |
| 6 | 4.391020 | -0.086729 | 4.218640  |
| 6 | 4.327451 | 0.754295  | -4.103080 |
| 6 | 4.198301 | 2.093611  | -3.591837 |
| 6 | 4.097693 | -2.742503 | 3.207895  |
| 6 | 3.953370 | -3.649738 | 2.100020  |
| 6 | 3.935277 | 3.899647  | -1.393044 |
| 6 | 3.797900 | 4.146452  | 0.019110  |
| 6 | 3.673610 | -4.132723 | -0.702843 |
| 6 | 3.537252 | -3.650515 | -2.053636 |
| 6 | 3.512838 | 3.193290  | 2.697238  |
| 6 | 3.366173 | 2.106022  | 3.632925  |
| 6 | 3.272912 | -1.495231 | -3.908722 |
| 6 | 3.143864 | -0.083434 | -4.178238 |
| 6 | 3.070937 | -0.683569 | 4.166488  |
| 6 | 2.924082 | -2.041033 | 3.695713  |
| 6 | 2.886759 | 2.602810  | -3.245663 |
| 6 | 2.755421 | 3.548885  | -2.160805 |
| 6 | 2.636753 | -3.906094 | 1.552961  |
| 6 | 2.496802 | -4.191619 | 0.141936  |
| 6 | 2.483111 | 4.117827  | 0.623956  |
| 6 | 2.341284 | 3.673491  | 1.993804  |
| 6 | 2.225614 | -3.310430 | -2.560181 |
| 6 | 2.093967 | -2.244990 | -3.530582 |
| 6 | 2.050648 | 1.574266  | 3.905881  |
| 6 | 1.903075 | 0.168252  | 4.216591  |
| 6 | 1.836745 | 0.530648  | -4.142982 |
| 6 | 1.708108 | 1.904890  | -3.709667 |
| 6 | 1.610067 | -2.539674 | 3.363653  |
| 6 | 1.465450 | -3.514956 | 2.305304  |
| 6 | 1.445868 | 3.834139  | -1.621658 |
| 6 | 1.309365 | 4.161078  | -0.220534 |
| 6 | 1.185157 | -4.156816 | -0.462845 |
| 6 | 1.048733 | -3.749140 | -1.841634 |
| 6 | 1.027023 | 3.359272  | 2.505659  |
| 6 | 0.881251 | 2.325798  | 3.501864  |
| 6 | 0.785236 | -1.700820 | -3.813764 |
| 6 | 0.655929 | -0.307979 | -4.163462 |
| 6 | 0.586432 | -0.428896 | 4.194160  |
| 6 | 0.438633 | -1.807765 | 3.803267  |
| 6 | 0.397904 | 2.428548  | -3.388558 |
| 6 | 0.265707 | 3.431873  | -2.363594 |
| 6 | 0.148592 | -3.794454 | 1.771559  |

|   |           |           |           |
|---|-----------|-----------|-----------|
| 6 | 0.006930  | -4.158405 | 0.385616  |
| 6 | -0.006930 | 4.158387  | 0.385801  |
| 6 | -0.148592 | 3.794375  | 1.771728  |
| 6 | -0.265707 | -3.431770 | -2.363747 |
| 6 | -0.397905 | -2.428399 | -3.388666 |
| 6 | -0.438634 | 1.807596  | 3.803347  |
| 6 | -0.586432 | 0.428709  | 4.194179  |
| 6 | -0.655929 | 0.308162  | -4.163448 |
| 6 | -0.785237 | 1.700988  | -3.813687 |
| 6 | -0.881252 | -2.325954 | 3.501760  |
| 6 | -1.027023 | -3.359384 | 2.505509  |
| 6 | -1.048733 | 3.749220  | -1.841467 |
| 6 | -1.185157 | 4.156836  | -0.462660 |
| 6 | -1.309365 | -4.161069 | -0.220719 |
| 6 | -1.445868 | -3.834068 | -1.621829 |
| 6 | -1.465450 | 3.514853  | 2.305460  |
| 6 | -1.610067 | 2.539524  | 3.363765  |
| 6 | -1.708108 | -1.904727 | -3.709751 |
| 6 | -1.836746 | -0.530466 | -4.143005 |
| 6 | -1.903075 | -0.168440 | 4.216583  |
| 6 | -2.050648 | -1.574439 | 3.905811  |
| 6 | -2.093967 | 2.245145  | -3.530481 |
| 6 | -2.225613 | 3.310543  | -2.560034 |
| 6 | -2.341284 | -3.673580 | 1.993641  |
| 6 | -2.483111 | -4.117856 | 0.623774  |
| 6 | -2.496802 | 4.191613  | 0.142122  |
| 6 | -2.636753 | 3.906025  | 1.553135  |
| 6 | -2.755422 | -3.548790 | -2.160963 |
| 6 | -2.886759 | -2.602666 | -3.245778 |
| 6 | -2.924083 | 2.040868  | 3.695804  |
| 6 | -3.070937 | 0.683384  | 4.166518  |
| 6 | -3.143865 | 0.083619  | -4.178233 |
| 6 | -3.272912 | 1.495404  | -3.908655 |
| 6 | -3.366174 | -2.106184 | 3.632832  |
| 6 | -3.512838 | -3.193411 | 2.697096  |
| 6 | -3.537252 | 3.650606  | -2.053473 |
| 6 | -3.673609 | 4.132755  | -0.702659 |
| 6 | -3.797900 | -4.146454 | 0.018926  |
| 6 | -3.935277 | -3.899586 | -1.393217 |
| 6 | -3.953370 | 3.649645  | 2.100182  |
| 6 | -4.097694 | 2.742360  | 3.208016  |
| 6 | -4.198302 | -2.093452 | -3.591928 |
| 6 | -4.327452 | -0.754114 | -4.103112 |
| 6 | -4.391021 | 0.086541  | 4.218643  |
| 6 | -4.539021 | -1.326818 | 3.991211  |
| 6 | -4.586077 | 2.054458  | -3.653086 |
| 6 | -4.718313 | 3.167738  | -2.748933 |
| 6 | -4.832942 | -3.534452 | 2.201631  |
| 6 | -4.975941 | -4.054056 | 0.864937  |
| 6 | -4.991162 | 4.199684  | -0.098443 |
| 6 | -5.130472 | 3.998737  | 1.324005  |
| 6 | -5.250593 | -3.644885 | -1.949368 |
| 6 | -5.381642 | -2.766603 | -3.088167 |
| 6 | -5.417103 | 2.265482  | 3.574929  |
| 6 | -5.562945 | 0.937046  | 4.126901  |
| 6 | -5.638751 | -0.142350 | -4.181351 |
| 6 | -5.766896 | 1.286132  | -3.995200 |
| 6 | -5.857836 | -1.876618 | 3.756992  |
| 6 | -6.004305 | -3.021030 | 2.881589  |
| 6 | -6.030779 | 3.540345  | -2.266348 |
| 6 | -6.165471 | 4.097928  | -0.936489 |
| 6 | -6.290076 | -4.122209 | 0.264768  |
| 6 | -6.426766 | -3.952733 | -1.166751 |
| 6 | -6.442568 | 3.778291  | 1.886442  |
| 6 | -6.586156 | 2.933794  | 3.054280  |
| 6 | -6.688461 | -2.280653 | -3.465071 |
| 6 | -6.817514 | -0.967543 | -4.059603 |
| 6 | -6.876372 | 0.346834  | 4.214325  |
| 6 | -7.023078 | -1.084177 | 4.066454  |
| 6 | -7.074170 | 1.855649  | -3.770539 |



|   |            |           |           |
|---|------------|-----------|-----------|
| 6 | -7.205017  | 3.019491  | -2.926139 |
| 6 | -7.317449  | -3.381447 | 2.404500  |
| 6 | -7.461551  | -3.974314 | 1.098755  |
| 6 | -7.477677  | 4.184132  | -0.336064 |
| 6 | -7.615271  | 4.060619  | 1.090395  |
| 6 | -7.738181  | -3.715711 | -1.729151 |
| 6 | -7.868378  | -2.906111 | -2.909699 |
| 6 | -7.903348  | 2.470007  | 3.439777  |
| 6 | -8.047392  | 1.185130  | 4.057685  |
| 6 | -8.128497  | -0.357797 | -4.161800 |
| 6 | -8.255919  | 1.065354  | -4.054331 |
| 6 | -8.344133  | -1.640650 | 3.849203  |
| 6 | -8.491921  | -2.816259 | 3.046254  |
| 6 | -8.521825  | 3.406871  | -2.455319 |
| 6 | -8.656608  | 4.027356  | -1.171773 |
| 6 | -8.782281  | -4.062335 | 0.501866  |
| 6 | -8.919254  | -3.973473 | -0.921143 |
| 6 | -8.938085  | 3.864802  | 1.664863  |
| 6 | -9.086805  | 3.107994  | 2.881012  |
| 6 | -9.185873  | -2.437673 | -3.312092 |
| 6 | -9.320367  | -1.175740 | -3.994187 |
| 6 | -9.377409  | 0.605150  | 4.194505  |
| 6 | -9.523340  | -0.837898 | 4.134423  |
| 6 | -9.578359  | 1.650196  | -3.877654 |
| 6 | -9.708617  | 2.867081  | -3.095488 |
| 6 | -9.818080  | -3.214570 | 2.606272  |
| 6 | -9.963985  | -3.885486 | 1.326347  |
| 6 | -9.975558  | 4.164223  | -0.585159 |
| 6 | -10.104201 | 4.121994  | 0.858736  |
| 6 | -10.236315 | -3.787403 | -1.496294 |
| 6 | -10.358260 | -3.043115 | -2.734508 |
| 6 | -10.407838 | 2.713666  | 3.331914  |
| 6 | -10.540811 | 1.437648  | 4.071308  |
| 6 | -10.634606 | -0.593325 | -4.185741 |
| 6 | -10.750758 | 0.879959  | -4.185154 |
| 6 | -10.831638 | -1.422052 | 4.010309  |
| 6 | -10.979562 | -2.670494 | 3.257083  |
| 6 | -11.013903 | 3.314523  | -2.679613 |
| 6 | -11.149407 | 4.010660  | -1.404106 |
| 6 | -11.274616 | -4.044722 | 0.747676  |
| 6 | -11.413045 | -4.032682 | -0.701939 |
| 6 | -11.412826 | 3.979688  | 1.457158  |
| 6 | -11.535849 | 3.331048  | 2.713247  |
| 6 | -11.663234 | -2.608411 | -3.183555 |
| 6 | -11.773591 | -1.424763 | -3.954721 |
| 6 | -11.820678 | 0.812962  | 4.319755  |
| 6 | -11.960450 | -0.565027 | 4.307720  |
| 6 | -12.025874 | 1.558428  | -4.080953 |
| 6 | -12.152235 | 2.738020  | -3.370569 |
| 6 | -12.270589 | -3.177836 | 2.830068  |
| 6 | -12.411107 | -3.851969 | 1.633768  |
| 6 | -12.443425 | 4.231907  | -0.765730 |
| 6 | -12.571586 | 4.236540  | 0.603568  |
| 6 | -12.707642 | -3.901457 | -1.366602 |
| 6 | -12.829523 | -3.238412 | -2.564135 |
| 1 | 13.820957  | 3.058528  | -3.002329 |
| 1 | 13.608575  | 4.256774  | -0.849668 |
| 1 | 13.565112  | -4.300852 | 1.068423  |
| 1 | 13.341590  | -4.297274 | -1.393596 |
| 1 | 13.415387  | 4.125727  | 1.286264  |
| 1 | 13.165647  | 2.926012  | 3.413695  |
| 1 | 13.150959  | -3.164759 | -3.213202 |
| 1 | 12.927914  | -1.070844 | -4.473203 |
| 1 | 12.964808  | 1.001362  | 4.380897  |
| 1 | 12.718415  | -1.439478 | 4.402216  |
| 1 | 12.779278  | 1.037867  | -4.162549 |
| 1 | 12.546109  | -3.107757 | 3.079234  |
| 1 | -12.546109 | 3.107623  | 3.079367  |
| 1 | -12.779279 | -1.037683 | -4.162593 |
| 1 | -12.718417 | 1.439282  | 4.402264  |

|   |            |           |           |
|---|------------|-----------|-----------|
| 1 | -12.964810 | -1.001556 | 4.380842  |
| 1 | -12.927915 | 1.071042  | -4.473143 |
| 1 | -13.150958 | 3.164904  | -3.213057 |
| 1 | -13.165648 | -2.926165 | 3.413563  |
| 1 | -13.415386 | -4.125786 | 1.286079  |
| 1 | -13.341587 | 4.297350  | -1.393408 |
| 1 | -13.565110 | 4.300817  | 1.068610  |
| 1 | -13.608573 | -4.256751 | -0.849861 |
| 1 | -13.820957 | -3.058404 | -3.002467 |

Nanotube (7,5) u10v05  
B3LYP/STO-3G Energy: -9425.901494

|   |           |           |           |
|---|-----------|-----------|-----------|
| 6 | 12.936363 | -2.529944 | 3.255561  |
| 6 | 12.803056 | -3.476459 | 2.268237  |
| 6 | 12.692480 | 3.880071  | -1.715806 |
| 6 | 12.573539 | 4.228055  | -0.390679 |
| 6 | 12.485252 | -4.198216 | -0.642564 |
| 6 | 12.339283 | -3.853501 | -1.971024 |
| 6 | 12.292318 | 3.457049  | 2.512600  |
| 6 | 12.165108 | 2.500034  | 3.502275  |
| 6 | 12.031339 | -1.705190 | -4.067479 |
| 6 | 11.898470 | -0.375287 | -4.430391 |
| 6 | 11.898342 | -0.415004 | 4.143076  |
| 6 | 11.777272 | -1.755166 | 3.700042  |
| 6 | 11.637734 | 2.471574  | -3.517859 |
| 6 | 11.526600 | 3.420362  | -2.469014 |
| 6 | 11.503152 | -3.765644 | 1.666700  |
| 6 | 11.354209 | -4.148749 | 0.270094  |
| 6 | 11.282632 | 4.186831  | 0.289977  |
| 6 | 11.152088 | 3.843298  | 1.701862  |
| 6 | 11.047520 | -3.464057 | -2.506534 |
| 6 | 10.900259 | -2.449976 | -3.553621 |
| 6 | 10.887385 | 1.878223  | 3.782850  |
| 6 | 10.764446 | 0.455229  | 4.160391  |
| 6 | 10.623367 | 0.300929  | -4.342135 |
| 6 | 10.502054 | 1.723849  | -3.952396 |
| 6 | 10.467064 | -2.282205 | 3.384268  |
| 6 | 10.332980 | -3.317661 | 2.378673  |
| 6 | 10.222635 | 3.720184  | -1.920181 |
| 6 | 10.103843 | 4.132641  | -0.535103 |
| 6 | 10.040036 | -4.135508 | -0.322607 |
| 6 | 9.887950  | -3.815327 | -1.731042 |
| 6 | 9.847291  | 3.526163  | 2.225577  |
| 6 | 9.716382  | 2.551582  | 3.294504  |
| 6 | 9.593899  | -1.908496 | -3.815917 |
| 6 | 9.454782  | -0.527871 | -4.242385 |
| 6 | 9.446339  | -0.148650 | 4.131333  |
| 6 | 9.301447  | -1.542240 | 3.794961  |
| 6 | 9.186322  | 2.229274  | -3.610458 |
| 6 | 9.049802  | 3.273166  | -2.627581 |
| 6 | 9.011185  | -3.637086 | 1.878234  |
| 6 | 8.863543  | -4.087328 | 0.526381  |
| 6 | 8.788361  | 4.160017  | 0.073805  |
| 6 | 8.658958  | 3.890909  | 1.474437  |
| 6 | 8.560750  | -3.534744 | -2.250904 |
| 6 | 8.412868  | -2.603446 | -3.327763 |
| 6 | 8.392697  | 2.039722  | 3.621798  |
| 6 | 8.259456  | 0.692335  | 4.090544  |
| 6 | 8.128967  | 0.076622  | -4.250835 |
| 6 | 7.995845  | 1.477537  | -3.981101 |
| 6 | 7.979339  | -2.089750 | 3.533078  |
| 6 | 7.837137  | -3.173456 | 2.599931  |
| 6 | 7.732142  | 3.618416  | -2.115538 |
| 6 | 7.604611  | 4.104393  | -0.768098 |
| 6 | 7.539073  | -4.146862 | -0.065594 |
| 6 | 7.388112  | -3.908135 | -1.478484 |
| 6 | 7.343419  | 3.645290  | 2.035572  |

|   |          |           |           |
|---|----------|-----------|-----------|
| 6 | 7.212473 | 2.738133  | 3.150498  |
| 6 | 7.092940 | -2.112175 | -3.672391 |
| 6 | 6.952334 | -0.766315 | -4.180839 |
| 6 | 6.944880 | 0.084800  | 4.154470  |
| 6 | 6.805809 | -1.335347 | 3.916604  |
| 6 | 6.683635 | 2.033359  | -3.719985 |
| 6 | 6.552324 | 3.149314  | -2.806919 |
| 6 | 6.520510 | -3.538646 | 2.124522  |
| 6 | 6.372624 | -4.068418 | 0.785534  |
| 6 | 6.295782 | 4.183820  | -0.158799 |
| 6 | 6.166896 | 3.987007  | 1.269973  |
| 6 | 6.072963 | -3.673583 | -2.024540 |
| 6 | 5.925586 | -2.791252 | -3.163212 |
| 6 | 5.903835 | 2.253444  | 3.520514  |
| 6 | 5.770368 | 0.921251  | 4.067380  |
| 6 | 5.642448 | -0.164635 | -4.240416 |
| 6 | 5.507406 | 1.261860  | -4.046478 |
| 6 | 5.494265 | -1.893759 | 3.684566  |
| 6 | 5.351305 | -3.033788 | 2.809447  |
| 6 | 5.245345 | 3.515781  | -2.313335 |
| 6 | 5.116453 | 4.075445  | -0.988996 |
| 6 | 5.054640 | -4.148545 | 0.195657  |
| 6 | 4.904095 | -3.987968 | -1.228942 |
| 6 | 4.856069 | 3.759076  | 1.838675  |
| 6 | 4.724374 | 2.915507  | 2.998871  |
| 6 | 4.608010 | -2.311175 | -3.522881 |
| 6 | 4.465596 | -1.002252 | -4.104448 |
| 6 | 4.456214 | 0.318094  | 4.155542  |
| 6 | 4.317689 | -1.106781 | 4.005623  |
| 6 | 4.193488 | 1.825745  | -3.807249 |
| 6 | 4.061475 | 2.987527  | -2.968187 |
| 6 | 4.031430 | -3.414401 | 2.344829  |
| 6 | 3.882592 | -4.013569 | 1.043938  |
| 6 | 3.802906 | 4.173955  | -0.381103 |
| 6 | 3.672711 | 4.054573  | 1.048449  |
| 6 | 3.582172 | -3.776075 | -1.787221 |
| 6 | 3.433717 | -2.964175 | -2.969085 |
| 6 | 3.410295 | 2.448312  | 3.395323  |
| 6 | 3.276517 | 1.154384  | 4.018631  |
| 6 | 3.149047 | -0.403071 | -4.199318 |
| 6 | 3.012672 | 1.030212  | -4.092432 |
| 6 | 3.001495 | -1.679761 | 3.808855  |
| 6 | 2.858424 | -2.871080 | 3.004295  |
| 6 | 2.749913 | 3.384522  | -2.498380 |
| 6 | 2.620530 | 4.022405  | -1.207324 |
| 6 | 2.563310 | -4.132348 | 0.459592  |
| 6 | 2.413031 | -4.052300 | -0.976795 |
| 6 | 2.362361 | 3.863561  | 1.631697  |
| 6 | 2.231650 | 3.083383  | 2.843062  |
| 6 | 2.118407 | -2.511013 | -3.361241 |
| 6 | 1.975837 | -1.231457 | -4.021924 |
| 6 | 1.966136 | 0.559871  | 4.149463  |
| 6 | 1.828679 | -0.878819 | 4.085346  |
| 6 | 1.703576 | 1.606741  | -3.893304 |
| 6 | 1.571434 | 2.822069  | -3.120341 |
| 6 | 1.543846 | -3.277968 | 2.564676  |
| 6 | 1.395569 | -3.951868 | 1.294589  |
| 6 | 1.312782 | 4.152733  | -0.607423 |
| 6 | 1.182934 | 4.111619  | 0.830675  |
| 6 | 1.096334 | -3.870969 | -1.544015 |
| 6 | 0.947944 | -3.125680 | -2.770932 |
| 6 | 0.922475 | 2.638061  | 3.262710  |
| 6 | 0.789185 | 1.382355  | 3.959502  |
| 6 | 0.662726 | -0.639713 | -4.146742 |
| 6 | 0.525311 | 0.794711  | -4.123989 |
| 6 | 0.514778 | -1.459767 | 3.917738  |
| 6 | 0.371321 | -2.692401 | 3.186051  |
| 6 | 0.260262 | 3.238690  | -2.670077 |
| 6 | 0.129454 | 3.945773  | -1.422428 |
| 6 | 0.075480 | -4.096159 | 0.715939  |

|   |           |           |           |
|---|-----------|-----------|-----------|
| 6 | -0.075480 | -4.096130 | -0.716100 |
| 6 | -0.129454 | 3.945716  | 1.422589  |
| 6 | -0.260262 | 3.238582  | 2.670209  |
| 6 | -0.371321 | -2.692272 | -3.186156 |
| 6 | -0.514777 | -1.459609 | -3.917794 |
| 6 | -0.525311 | 0.794545  | 4.124024  |
| 6 | -0.662726 | -0.639880 | 4.146720  |
| 6 | -0.789185 | 1.382515  | -3.959444 |
| 6 | -0.922475 | 2.638192  | -3.262602 |
| 6 | -0.947944 | -3.125791 | 2.770810  |
| 6 | -1.096335 | -3.871031 | 1.543862  |
| 6 | -1.182935 | 4.111652  | -0.830507 |
| 6 | -1.312783 | 4.152708  | 0.607592  |
| 6 | -1.395570 | -3.951815 | -1.294744 |
| 6 | -1.543846 | -3.277864 | -2.564804 |
| 6 | -1.571434 | 2.821943  | 3.120457  |
| 6 | -1.703576 | 1.606584  | 3.893372  |
| 6 | -1.828678 | -0.878655 | -4.085379 |
| 6 | -1.966135 | 0.560038  | -4.149439 |
| 6 | -1.975837 | -1.231619 | 4.021878  |
| 6 | -2.118407 | -2.511148 | 3.361143  |
| 6 | -2.231650 | 3.083497  | -2.842936 |
| 6 | -2.362361 | 3.863626  | -1.631539 |
| 6 | -2.413032 | -4.052338 | 0.976635  |
| 6 | -2.563311 | -4.132328 | -0.459755 |
| 6 | -2.620531 | 4.022355  | 1.207488  |
| 6 | -2.749914 | 3.384420  | 2.498519  |
| 6 | -2.858423 | -2.870959 | -3.004408 |
| 6 | -3.001494 | -1.679607 | -3.808922 |
| 6 | -3.012673 | 1.030047  | 4.092477  |
| 6 | -3.149047 | -0.403240 | 4.199305  |
| 6 | -3.276516 | 1.154545  | -4.018585 |
| 6 | -3.410294 | 2.448448  | -3.395225 |
| 6 | -3.433717 | -2.964294 | 2.968969  |
| 6 | -3.582173 | -3.776145 | 1.787072  |
| 6 | -3.672711 | 4.054614  | -1.048285 |
| 6 | -3.802907 | 4.173938  | 0.381272  |
| 6 | -3.882593 | -4.013524 | -1.044098 |
| 6 | -4.031430 | -3.414305 | -2.344965 |
| 6 | -4.061476 | 2.987407  | 2.968308  |
| 6 | -4.193489 | 1.825591  | 3.807325  |
| 6 | -4.317687 | -1.106620 | -4.005668 |
| 6 | -4.456212 | 0.318262  | -4.155531 |
| 6 | -4.465597 | -1.002417 | 4.104411  |
| 6 | -4.608011 | -2.311316 | 3.522791  |
| 6 | -4.724373 | 2.915627  | -2.998754 |
| 6 | -4.856069 | 3.759148  | -1.838524 |
| 6 | -4.904096 | -3.988014 | 1.228783  |
| 6 | -5.054641 | -4.148534 | -0.195823 |
| 6 | -5.116454 | 4.075403  | 0.989160  |
| 6 | -5.245346 | 3.515686  | 2.313477  |
| 6 | -5.351304 | -3.033672 | -2.809569 |
| 6 | -5.494263 | -1.893610 | -3.684644 |
| 6 | -5.507406 | 1.261697  | 4.046531  |
| 6 | -5.642449 | -0.164806 | 4.240413  |
| 6 | -5.770366 | 0.921415  | -4.067347 |
| 6 | -5.903833 | 2.253585  | -3.520426 |
| 6 | -5.925587 | -2.791379 | 3.163102  |
| 6 | -6.072965 | -3.673662 | 2.024393  |
| 6 | -6.166896 | 3.987056  | -1.269814 |
| 6 | -6.295783 | 4.183811  | 0.158966  |
| 6 | -6.372624 | -4.068382 | -0.785697 |
| 6 | -6.520510 | -3.538557 | -2.124665 |
| 6 | -6.552325 | 3.149198  | 2.807045  |
| 6 | -6.683636 | 2.033208  | 3.720068  |
| 6 | -6.805807 | -1.335189 | -3.916662 |
| 6 | -6.944878 | 0.084967  | -4.154473 |
| 6 | -6.952334 | -0.766483 | 4.180812  |
| 6 | -7.092941 | -2.112323 | 3.672309  |
| 6 | -7.212471 | 2.738260  | -3.150392 |

|   |            |           |           |
|---|------------|-----------|-----------|
| 6 | -7.343419  | 3.645370  | -2.035428 |
| 6 | -7.388114  | -3.908191 | 1.478326  |
| 6 | -7.539074  | -4.146859 | 0.065427  |
| 6 | -7.604612  | 4.104358  | 0.768261  |
| 6 | -7.732143  | 3.618327  | 2.115681  |
| 6 | -7.837137  | -3.173348 | -2.600061 |
| 6 | -7.979337  | -2.089607 | -3.533167 |
| 6 | -7.995845  | 1.477376  | 3.981163  |
| 6 | -8.128968  | 0.076451  | 4.250842  |
| 6 | -8.259453  | 0.692500  | -4.090525 |
| 6 | -8.392695  | 2.039867  | -3.621723 |
| 6 | -8.412869  | -2.603580 | 3.327659  |
| 6 | -8.560751  | -3.534831 | 2.250761  |
| 6 | -8.658957  | 3.890965  | -1.474283 |
| 6 | -8.788362  | 4.160015  | -0.073640 |
| 6 | -8.863544  | -4.087300 | -0.526547 |
| 6 | -9.011185  | -3.637005 | -1.878382 |
| 6 | -9.049804  | 3.273056  | 2.627710  |
| 6 | -9.186324  | 2.229127  | 3.610547  |
| 6 | -9.301445  | -1.542086 | -3.795031 |
| 6 | -9.446336  | -0.148483 | -4.131349 |
| 6 | -9.454782  | -0.528043 | 4.242368  |
| 6 | -9.593900  | -1.908650 | 3.815843  |
| 6 | -9.716380  | 2.551715  | -3.294408 |
| 6 | -9.847290  | 3.526250  | -2.225440 |
| 6 | -9.887952  | -3.815391 | 1.730887  |
| 6 | -10.040036 | -4.135513 | 0.322439  |
| 6 | -10.103844 | 4.132612  | 0.535265  |
| 6 | -10.222637 | 3.720099  | 1.920326  |
| 6 | -10.332979 | -3.317561 | -2.378810 |
| 6 | -10.467063 | -2.282067 | -3.384367 |
| 6 | -10.502055 | 1.723690  | 3.952470  |
| 6 | -10.623368 | 0.300753  | 4.342154  |
| 6 | -10.764444 | 0.455397  | -4.160379 |
| 6 | -10.887382 | 1.878376  | -3.782781 |
| 6 | -10.900259 | -2.450119 | 3.553528  |
| 6 | -11.047522 | -3.464155 | 2.506395  |
| 6 | -11.152087 | 3.843362  | -1.701713 |
| 6 | -11.282633 | 4.186834  | -0.289813 |
| 6 | -11.354209 | -4.148729 | -0.270262 |
| 6 | -11.503151 | -3.765570 | -1.666856 |
| 6 | -11.526602 | 3.420256  | 2.469149  |
| 6 | -11.637735 | 2.471431  | 3.517960  |
| 6 | -11.777270 | -1.755014 | -3.700117 |
| 6 | -11.898342 | -0.414832 | -4.143089 |
| 6 | -11.898468 | -0.375469 | 4.430393  |
| 6 | -12.031338 | -1.705357 | 4.067423  |
| 6 | -12.165104 | 2.500173  | -3.502181 |
| 6 | -12.292316 | 3.457146  | -2.512467 |
| 6 | -12.339285 | -3.853571 | 1.970866  |
| 6 | -12.485253 | -4.198232 | 0.642393  |
| 6 | -12.573541 | 4.228023  | 0.390841  |
| 6 | -12.692482 | 3.879988  | 1.715955  |
| 6 | -12.803055 | -3.476361 | -2.268380 |
| 6 | -12.936363 | -2.529805 | -3.255665 |
| 1 | 13.931645  | -2.250060 | 3.627744  |
| 1 | 13.698715  | -3.957745 | 1.854593  |
| 1 | 13.683074  | 3.816547  | -2.187024 |
| 1 | 13.476189  | 4.446729  | 0.194444  |
| 1 | 13.490544  | -4.380665 | -0.242075 |
| 1 | 13.231147  | -3.766670 | -2.605046 |
| 1 | 13.291752  | 3.823904  | 2.246381  |
| 1 | 13.067220  | 2.124536  | 4.002541  |
| 1 | 13.032733  | -2.152997 | -4.032951 |
| 1 | 12.798597  | 0.203044  | -4.676060 |
| 1 | 12.907414  | 0.006290  | 4.240074  |
| 1 | 12.644364  | 2.155481  | -3.820675 |
| 1 | -12.644368 | 2.155330  | 3.820771  |
| 1 | -12.907422 | 0.006476  | -4.240032 |
| 1 | -12.798595 | 0.202849  | 4.676096  |

|   |            |           |           |
|---|------------|-----------|-----------|
| 1 | -13.032734 | -2.153167 | 4.032880  |
| 1 | -13.067215 | 2.124694  | -4.002464 |
| 1 | -13.291753 | 3.823989  | -2.246233 |
| 1 | -13.231151 | -3.766760 | 2.604889  |
| 1 | -13.490539 | -4.380668 | 0.241899  |
| 1 | -13.476192 | 4.446709  | -0.194276 |
| 1 | -13.683076 | 3.816440  | 2.187165  |
| 1 | -13.698714 | -3.957663 | -1.854756 |
| 1 | -13.931646 | -2.249899 | -3.627834 |

Nanotube (7,5) u10v06  
B3LYP/STO-3G Energy: -9501.198307

|   |            |           |           |
|---|------------|-----------|-----------|
| 6 | -13.005531 | -1.557198 | -3.859615 |
| 6 | -12.883096 | -2.731565 | -3.148007 |
| 6 | -12.783097 | 3.346406  | 2.598309  |
| 6 | -12.653203 | 4.027484  | 1.405313  |
| 6 | -12.589279 | -4.186201 | -0.524654 |
| 6 | -12.452423 | -4.198303 | 0.854353  |
| 6 | -12.350552 | 4.034992  | -1.594992 |
| 6 | -12.218368 | 3.361698  | -2.802276 |
| 6 | -12.155249 | -2.663812 | 3.434646  |
| 6 | -12.022033 | -1.466967 | 4.131256  |
| 6 | -11.954998 | 0.709710  | -4.174040 |
| 6 | -11.843001 | -0.709219 | -4.089717 |
| 6 | -11.747218 | 1.519213  | 3.989540  |
| 6 | -11.627022 | 2.713863  | 3.217080  |
| 6 | -11.593304 | -3.176801 | -2.642514 |
| 6 | -11.456018 | -3.914351 | -1.382226 |
| 6 | -11.362075 | 4.164755  | 0.751821  |
| 6 | -11.221069 | 4.196350  | -0.710325 |
| 6 | -11.170052 | -3.970708 | 1.478632  |
| 6 | -11.027793 | -3.255386 | 2.760457  |
| 6 | -10.947472 | 2.830313  | -3.224287 |
| 6 | -10.825862 | 1.543805  | -3.958115 |
| 6 | -10.752114 | -0.799190 | 4.229533  |
| 6 | -10.624252 | 0.683391  | 4.219926  |
| 6 | -10.541145 | -1.303513 | -3.907178 |
| 6 | -10.418627 | -2.563728 | -3.199872 |
| 6 | -10.321935 | 3.134576  | 2.770217  |
| 6 | -10.191697 | 3.888556  | 1.538528  |
| 6 | -10.148629 | -4.052609 | -0.796853 |
| 6 | -10.006310 | -4.105950 | 0.645963  |
| 6 | -9.914572  | 4.009769  | -1.285659 |
| 6 | -9.777691  | 3.342280  | -2.565804 |
| 6 | -9.722704  | -2.799036 | 3.154556  |
| 6 | -9.583190  | -1.576527 | 3.920124  |
| 6 | -9.506207  | 0.945764  | -4.069928 |
| 6 | -9.367658  | -0.486258 | -4.103308 |
| 6 | -9.300292  | 1.251597  | 4.024214  |
| 6 | -9.153141  | 2.512561  | 3.346467  |
| 6 | -9.098188  | -3.008150 | -2.790164 |
| 6 | -8.962063  | -3.794244 | -1.598936 |
| 6 | -8.867957  | 4.067086  | 0.966854  |
| 6 | -8.727981  | 4.167423  | -0.457467 |
| 6 | -8.679291  | -3.978104 | 1.229751  |
| 6 | -8.536921  | -3.354713 | 2.515151  |
| 6 | -8.450488  | 2.930612  | -3.008284 |
| 6 | -8.317780  | 1.743173  | -3.812529 |
| 6 | -8.254339  | -1.003565 | 4.099593  |
| 6 | -8.116188  | 0.427538  | 4.202986  |
| 6 | -8.050630  | -1.089394 | -3.988791 |
| 6 | -7.920222  | -2.386396 | -3.362241 |
| 6 | -7.833071  | 2.975492  | 2.955398  |
| 6 | -7.695077  | 3.797437  | 1.771862  |
| 6 | -7.647462  | -4.015159 | -1.036972 |
| 6 | -7.507232  | -4.149003 | 0.400615  |
| 6 | -7.415073  | 4.072263  | -1.052896 |

|   |           |           |           |
|---|-----------|-----------|-----------|
| 6 | -7.278816 | 3.476385  | -2.370784 |
| 6 | -7.225774 | -2.977098 | 2.983089  |
| 6 | -7.086386 | -1.799881 | 3.825253  |
| 6 | -7.010682 | 1.167850  | -4.019162 |
| 6 | -6.877673 | -0.271608 | -4.153148 |
| 6 | -6.806707 | 1.023213  | 4.100386  |
| 6 | -6.665328 | 2.339226  | 3.504326  |
| 6 | -6.613038 | -2.863837 | -2.985535 |
| 6 | -6.477192 | -3.721091 | -1.826031 |
| 6 | -6.385148 | 4.018593  | 1.211279  |
| 6 | -6.245390 | 4.193607  | -0.218722 |
| 6 | -6.197964 | -4.061552 | 0.995288  |
| 6 | -6.056447 | -3.501293 | 2.321044  |
| 6 | -5.967941 | 3.091923  | -2.838453 |
| 6 | -5.832984 | 1.946155  | -3.706134 |
| 6 | -5.773369 | -1.238252 | 4.039821  |
| 6 | -5.632454 | 0.186785  | 4.220279  |
| 6 | -5.566514 | -0.876270 | -4.060019 |
| 6 | -5.433645 | -2.202793 | -3.508811 |
| 6 | -5.349812 | 2.812940  | 3.129212  |
| 6 | -5.209058 | 3.694545  | 1.995528  |
| 6 | -5.160315 | -3.957047 | -1.267938 |
| 6 | -5.020129 | -4.169709 | 0.152376  |
| 6 | -4.926902 | 4.116015  | -0.817836 |
| 6 | -4.788358 | 3.596950  | -2.158710 |
| 6 | -4.737210 | -3.139572 | 2.803078  |
| 6 | -4.596131 | -2.020455 | 3.706822  |
| 6 | -4.518183 | 1.382724  | -3.942540 |
| 6 | -4.385564 | -0.041047 | -4.165871 |
| 6 | -4.315071 | 0.787228  | 4.150553  |
| 6 | -4.174508 | 2.134611  | 3.637982  |
| 6 | -4.120779 | -2.699950 | -3.155438 |
| 6 | -3.984993 | -3.621292 | -2.044271 |
| 6 | -3.894479 | 3.945658  | 1.446379  |
| 6 | -3.754508 | 4.198114  | 0.024549  |
| 6 | -3.707646 | -4.119357 | 0.754025  |
| 6 | -3.566809 | -3.633492 | 2.114694  |
| 6 | -3.478498 | 3.243913  | -2.652129 |
| 6 | -3.343707 | 2.145010  | -3.589831 |
| 6 | -3.285542 | -1.473683 | 3.960503  |
| 6 | -3.145053 | -0.054520 | 4.226730  |
| 6 | -3.079102 | -0.649542 | -4.112194 |
| 6 | -2.946502 | -2.012582 | -3.638410 |
| 6 | -2.864544 | 2.629794  | 3.293043  |
| 6 | -2.723862 | 3.578655  | 2.207937  |
| 6 | -2.675530 | -3.887005 | -1.499998 |
| 6 | -2.536012 | -4.177479 | -0.089557 |
| 6 | -2.442833 | 4.149868  | -0.577132 |
| 6 | -2.303681 | 3.704129  | -1.944855 |
| 6 | -2.254159 | -3.295901 | 2.613088  |
| 6 | -2.112370 | -2.230174 | 3.578062  |
| 6 | -2.032821 | 1.595204  | -3.852570 |
| 6 | -1.899440 | 0.190649  | -4.158892 |
| 6 | -1.830444 | 0.547071  | 4.185743  |
| 6 | -1.688975 | 1.917839  | 3.754639  |
| 6 | -1.633396 | -2.523660 | -3.306830 |
| 6 | -1.497052 | -3.502241 | -2.253888 |
| 6 | -1.406996 | 3.852365  | 1.670667  |
| 6 | -1.265671 | 4.181581  | 0.270909  |
| 6 | -1.219054 | -4.155013 | 0.513760  |
| 6 | -1.077673 | -3.748598 | 1.893854  |
| 6 | -0.988360 | 3.377803  | -2.456201 |
| 6 | -0.852714 | 2.338561  | -3.453860 |
| 6 | -0.795924 | -1.699131 | 3.863227  |
| 6 | -0.655095 | -0.301118 | 4.213716  |
| 6 | -0.587708 | -0.419866 | -4.143893 |
| 6 | -0.454992 | -1.808947 | -3.753191 |
| 6 | -0.374600 | 2.434214  | 3.443369  |
| 6 | -0.233820 | 3.446230  | 2.414322  |
| 6 | -0.185088 | -3.803309 | -1.727693 |

|   |           |           |           |
|---|-----------|-----------|-----------|
| 6 | -0.046333 | -4.173308 | -0.332110 |
| 6 | 0.046336  | 4.173265  | -0.332637 |
| 6 | 0.185090  | 3.803088  | -1.728172 |
| 6 | 0.233821  | -3.445921 | 2.414756  |
| 6 | 0.374600  | -2.433775 | 3.443675  |
| 6 | 0.454989  | 1.808470  | -3.753419 |
| 6 | 0.587704  | 0.419340  | -4.143947 |
| 6 | 0.655093  | 0.301653  | 4.213680  |
| 6 | 0.795922  | 1.699622  | 3.863015  |
| 6 | 0.852712  | -2.339001 | -3.453568 |
| 6 | 0.988359  | -3.378115 | -2.455777 |
| 6 | 1.077675  | 3.748838  | 1.893381  |
| 6 | 1.219057  | 4.155076  | 0.513236  |
| 6 | 1.265674  | -4.181544 | 0.271436  |
| 6 | 1.406999  | -3.852149 | 1.671153  |
| 6 | 1.497052  | 3.501950  | -2.254329 |
| 6 | 1.633394  | 2.523237  | -3.307149 |
| 6 | 1.688974  | -1.917361 | 3.754882  |
| 6 | 1.830442  | -0.546539 | 4.185816  |
| 6 | 1.899435  | -0.191178 | -4.158873 |
| 6 | 2.032817  | -1.595694 | -3.852375 |
| 6 | 2.112368  | 2.230629  | 3.577785  |
| 6 | 2.254159  | 3.296232  | 2.612675  |
| 6 | 2.303681  | -3.704374 | -1.944390 |
| 6 | 2.442836  | -4.149936 | -0.576610 |
| 6 | 2.536015  | 4.177461  | -0.090084 |
| 6 | 2.675532  | 3.886808  | -1.500488 |
| 6 | 2.723864  | -3.578369 | 2.208388  |
| 6 | 2.864545  | -2.629373 | 3.293375  |
| 6 | 2.946499  | 2.012118  | -3.638667 |
| 6 | 3.079098  | 0.649019  | -4.112284 |
| 6 | 3.145051  | 0.055058  | 4.226731  |
| 6 | 3.285540  | 1.474187  | 3.960325  |
| 6 | 3.343703  | -2.145467 | -3.589569 |
| 6 | 3.478497  | -3.244249 | -2.651725 |
| 6 | 3.566810  | 3.633757  | 2.114237  |
| 6 | 3.707648  | 4.119445  | 0.753505  |
| 6 | 3.754511  | -4.198102 | 0.025077  |
| 6 | 3.894482  | -3.945464 | 1.446875  |
| 6 | 3.984995  | 3.621023  | -2.044728 |
| 6 | 4.120778  | 2.699544  | -3.155782 |
| 6 | 4.174508  | -2.134146 | 3.638255  |
| 6 | 4.315069  | -0.786700 | 4.150661  |
| 6 | 4.385559  | 0.040517  | -4.165889 |
| 6 | 4.518178  | -1.383226 | -3.942379 |
| 6 | 4.596129  | 2.020927  | 3.706577  |
| 6 | 4.737210  | 3.139926  | 2.802687  |
| 6 | 4.788358  | -3.597220 | -2.158261 |
| 6 | 4.926904  | -4.116109 | -0.817319 |
| 6 | 5.020133  | 4.169716  | 0.151850  |
| 6 | 5.160318  | 3.956872  | -1.268437 |
| 6 | 5.209062  | -3.694280 | 1.995992  |
| 6 | 5.349814  | -2.812535 | 3.129568  |
| 6 | 5.433644  | 2.202343  | -3.509095 |
| 6 | 5.566510  | 0.875752  | -4.060143 |
| 6 | 5.632452  | -0.186247 | 4.220316  |
| 6 | 5.773366  | 1.238767  | 4.039680  |
| 6 | 5.832980  | -1.946628 | -3.705905 |
| 6 | 5.967939  | -3.092282 | -2.838073 |
| 6 | 6.056448  | 3.501583  | 2.320606  |
| 6 | 6.197967  | 4.061665  | 0.994776  |
| 6 | 6.245393  | -4.193619 | -0.218196 |
| 6 | 6.385152  | -4.018421 | 1.211782  |
| 6 | 6.477194  | 3.720843  | -1.826500 |
| 6 | 6.613039  | 2.863447  | -2.985900 |
| 6 | 6.665329  | -2.338774 | 3.504625  |
| 6 | 6.806705  | -1.022689 | 4.100528  |
| 6 | 6.877668  | 0.271078  | -4.153203 |
| 6 | 7.010677  | -1.168363 | -4.019037 |
| 6 | 7.086383  | 1.800370  | 3.825043  |



|   |            |           |           |
|---|------------|-----------|-----------|
| 6 | 7.225773   | 2.977476  | 2.982723  |
| 6 | 7.278815   | -3.476682 | -2.370356 |
| 6 | 7.415075   | -4.072382 | -1.052387 |
| 6 | 7.507235   | 4.149035  | 0.400092  |
| 6 | 7.647465   | 4.015006  | -1.037477 |
| 6 | 7.695082   | -3.797191 | 1.772337  |
| 6 | 7.833074   | -2.975103 | 2.955773  |
| 6 | 7.920221   | 2.385959  | -3.362550 |
| 6 | 8.050627   | 1.088883  | -3.988948 |
| 6 | 8.116185   | -0.427001 | 4.203060  |
| 6 | 8.254335   | 1.004090  | 4.099490  |
| 6 | 8.317775   | -1.743661 | -3.812335 |
| 6 | 8.450485   | -2.930994 | -3.007933 |
| 6 | 8.536921   | 3.355027  | 2.514736  |
| 6 | 8.679294   | 3.978243  | 1.229252  |
| 6 | 8.727984   | -4.167459 | -0.456947 |
| 6 | 8.867962   | -4.066936 | 0.967360  |
| 6 | 8.962066   | 3.794016  | -1.599413 |
| 6 | 9.098189   | 3.007778  | -2.790547 |
| 6 | 9.153143   | -2.512123 | 3.346788  |
| 6 | 9.300290   | -1.251079 | 4.024389  |
| 6 | 9.367654   | 0.485731  | -4.103396 |
| 6 | 9.506202   | -0.946286 | -4.069841 |
| 6 | 9.583186   | 1.577030  | 3.919952  |
| 6 | 9.722702   | 2.799436  | 3.154220  |
| 6 | 9.777689   | -3.342602 | -2.565400 |
| 6 | 9.914574   | -4.009914 | -1.285163 |
| 6 | 10.006314  | 4.106006  | 0.645448  |
| 6 | 10.148633  | 4.052476  | -0.797362 |
| 6 | 10.191702  | -3.888329 | 1.539010  |
| 6 | 10.321939  | -3.134201 | 2.770608  |
| 6 | 10.418627  | 2.563306  | -3.200204 |
| 6 | 10.541142  | 1.303009  | -3.907365 |
| 6 | 10.624249  | -0.682848 | 4.220038  |
| 6 | 10.752109  | 0.799735  | 4.229467  |
| 6 | 10.825856  | -1.544314 | -3.957956 |
| 6 | 10.947468  | -2.830726 | -3.223957 |
| 6 | 11.027792  | 3.255731  | 2.760062  |
| 6 | 11.170055  | 3.970873  | 1.478137  |
| 6 | 11.221072  | -4.196412 | -0.709806 |
| 6 | 11.362081  | -4.164622 | 0.752336  |
| 6 | 11.456023  | 3.914139  | -1.382717 |
| 6 | 11.593306  | 3.176439  | -2.642918 |
| 6 | 11.627025  | -2.713431 | 3.217421  |
| 6 | 11.747217  | -1.518692 | 3.989748  |
| 6 | 11.842997  | 0.708691  | -4.089839 |
| 6 | 11.954993  | -0.710248 | -4.173992 |
| 6 | 12.022028  | 1.467502  | 4.131113  |
| 6 | 12.155246  | 2.664254  | 3.434341  |
| 6 | 12.218366  | -3.362052 | -2.801876 |
| 6 | 12.350553  | -4.035176 | -1.594498 |
| 6 | 12.452428  | 4.198373  | 0.853828  |
| 6 | 12.589284  | 4.186088  | -0.525178 |
| 6 | 12.653210  | -4.027258 | 1.405805  |
| 6 | 12.783103  | -3.346036 | 2.598720  |
| 6 | 12.883097  | 2.731143  | -3.148363 |
| 6 | 13.005529  | 1.556695  | -3.859837 |
| 1 | -13.998950 | -1.180145 | -4.139640 |
| 1 | -13.786556 | -3.288377 | -2.867766 |
| 1 | -13.779444 | 3.156872  | 3.021185  |
| 1 | -13.553891 | 4.379983  | 0.886308  |
| 1 | -13.594518 | -4.242039 | -0.961436 |
| 1 | -13.352381 | -4.261671 | 1.479617  |
| 1 | -13.353768 | 4.313608  | -1.247934 |
| 1 | -13.121648 | 3.122561  | -3.378413 |
| 1 | -13.160112 | -3.074011 | 3.271360  |
| 1 | -12.926662 | -0.964457 | 4.497520  |
| 1 | -12.963303 | 1.143070  | -4.158946 |
| 1 | -12.758387 | 1.139999  | 4.185797  |
| 1 | 12.758385  | -1.139452 | 4.185960  |

|   |           |           |           |
|---|-----------|-----------|-----------|
| 1 | 12.963297 | -1.143607 | -4.158847 |
| 1 | 12.926655 | 0.965045  | 4.497453  |
| 1 | 13.160109 | 3.074434  | 3.271009  |
| 1 | 13.121644 | -3.122995 | -3.378051 |
| 1 | 13.353770 | -4.313745 | -1.247405 |
| 1 | 13.352386 | 4.261812  | 1.479083  |
| 1 | 13.594525 | 4.241858  | -0.961966 |
| 1 | 13.553899 | -4.379808 | 0.886838  |
| 1 | 13.779449 | -3.156440 | 3.021568  |
| 1 | 13.786558 | 3.287987  | -2.868187 |
| 1 | 13.998947 | 1.179609  | -4.139822 |

Nanotube (7,5) u10v07  
B3LYP/STO-3G Energy: -9576.496310

|   |           |           |           |
|---|-----------|-----------|-----------|
| 6 | 13.138865 | -0.539799 | 4.066417  |
| 6 | 13.010197 | -1.856333 | 3.679226  |
| 6 | 12.869329 | 2.540911  | -3.441121 |
| 6 | 12.749915 | 3.503683  | -2.460298 |
| 6 | 12.695824 | -3.929089 | 1.513694  |
| 6 | 12.548204 | -4.293176 | 0.185027  |
| 6 | 12.471681 | 4.279109  | 0.440690  |
| 6 | 12.348283 | 3.940174  | 1.781311  |
| 6 | 12.230577 | -3.476038 | -2.701587 |
| 6 | 12.092082 | -2.499898 | -3.682649 |
| 6 | 12.092591 | 1.734561  | 3.794185  |
| 6 | 11.978639 | 0.342475  | 4.078456  |
| 6 | 11.820228 | 0.422237  | -4.311358 |
| 6 | 11.707386 | 1.774544  | -3.868975 |
| 6 | 11.716070 | -2.412031 | 3.311842  |
| 6 | 11.568907 | -3.445441 | 2.282204  |
| 6 | 11.463987 | 3.806891  | -1.853299 |
| 6 | 11.334907 | 4.211935  | -0.447335 |
| 6 | 11.260519 | -4.231442 | -0.466993 |
| 6 | 11.108165 | -3.870547 | -1.888454 |
| 6 | 11.079580 | 3.540478  | 2.335780  |
| 6 | 10.962315 | 2.487968  | 3.377891  |
| 6 | 10.821253 | -1.876835 | -3.939935 |
| 6 | 10.694423 | -0.441573 | -4.311045 |
| 6 | 10.674810 | -0.275262 | 4.063508  |
| 6 | 10.546058 | -1.674188 | 3.702881  |
| 6 | 10.406286 | 2.299356  | -3.534302 |
| 6 | 10.286963 | 3.343077  | -2.534663 |
| 6 | 10.256942 | -3.726058 | 1.761378  |
| 6 | 10.103408 | -4.146580 | 0.381222  |
| 6 | 10.032834 | 4.184302  | 0.166440  |
| 6 | 9.905417  | 3.869342  | 1.576434  |
| 6 | 9.800098  | -3.528747 | -2.377179 |
| 6 | 9.654826  | -2.544942 | -3.431444 |
| 6 | 9.643207  | 1.942738  | 3.649551  |
| 6 | 9.503687  | 0.567986  | 4.051298  |
| 6 | 9.372823  | 0.161654  | -4.256981 |
| 6 | 9.232382  | 1.554309  | -3.923240 |
| 6 | 9.222403  | -2.204927 | 3.429315  |
| 6 | 9.076853  | -3.268544 | 2.479441  |
| 6 | 8.968212  | 3.665668  | -2.017332 |
| 6 | 8.839940  | 4.127691  | -0.665529 |
| 6 | 8.771833  | -4.169704 | -0.205934 |
| 6 | 8.619379  | -3.897599 | -1.606897 |
| 6 | 8.581149  | 3.589345  | 2.119709  |
| 6 | 8.453421  | 2.650064  | 3.203331  |
| 6 | 8.324634  | -2.033669 | -3.741627 |
| 6 | 8.186445  | -0.677514 | -4.208416 |
| 6 | 8.185026  | -0.040890 | 4.104216  |
| 6 | 8.048949  | -1.454284 | 3.831817  |
| 6 | 7.915613  | 2.105576  | -3.652832 |
| 6 | 7.788196  | 3.202778  | -2.717956 |
| 6 | 7.757387  | -3.622602 | 2.002279  |

|   |          |           |           |
|---|----------|-----------|-----------|
| 6 | 7.605966 | -4.119704 | 0.648295  |
| 6 | 7.531182 | 4.192907  | -0.055739 |
| 6 | 7.404713 | 3.956410  | 1.371740  |
| 6 | 7.304126 | -3.650312 | -2.146486 |
| 6 | 7.158288 | -2.729564 | -3.262363 |
| 6 | 7.147009 | 2.151166  | 3.560874  |
| 6 | 7.013859 | 0.794936  | 4.061574  |
| 6 | 6.877974 | -0.071716 | -4.251999 |
| 6 | 6.742730 | 1.353643  | -4.011963 |
| 6 | 6.738551 | -2.008981 | 3.599494  |
| 6 | 6.593571 | -3.134143 | 2.698735  |
| 6 | 6.483083 | 3.564471  | -2.223003 |
| 6 | 6.355243 | 4.100470  | -0.884290 |
| 6 | 6.292189 | -4.185237 | 0.060979  |
| 6 | 6.140315 | -3.983902 | -1.363257 |
| 6 | 6.097308 | 3.709497  | 1.932428  |
| 6 | 5.967953 | 2.825827  | 3.066734  |
| 6 | 5.844031 | -2.238509 | -3.603965 |
| 6 | 5.702494 | -0.907352 | -4.143468 |
| 6 | 5.701692 | 0.190080  | 4.135782  |
| 6 | 5.563810 | -1.232935 | 3.944108  |
| 6 | 5.430968 | 1.911338  | -3.760013 |
| 6 | 5.300568 | 3.053930  | -2.888926 |
| 6 | 5.272358 | -3.501735 | 2.229210  |
| 6 | 5.121137 | -4.070660 | 0.912245  |
| 6 | 5.041510 | 4.183028  | -0.275355 |
| 6 | 4.912969 | 4.026039  | 1.154199  |
| 6 | 4.817127 | -3.754615 | -1.911914 |
| 6 | 4.668948 | -2.905382 | -3.071244 |
| 6 | 4.654093 | 2.345419  | 3.449094  |
| 6 | 4.521899 | 1.027704  | 4.031371  |
| 6 | 4.385594 | -0.305251 | -4.219096 |
| 6 | 4.250434 | 1.128312  | -4.068444 |
| 6 | 4.247504 | -1.800648 | 3.739163  |
| 6 | 4.102914 | -2.975488 | 2.902595  |
| 6 | 3.990192 | 3.441518  | -2.412369 |
| 6 | 3.862126 | 4.050372  | -1.102195 |
| 6 | 3.803518 | -4.173749 | 0.327769  |
| 6 | 3.651912 | -4.053028 | -1.110803 |
| 6 | 3.606056 | 3.815930  | 1.731615  |
| 6 | 3.477385 | 2.995078  | 2.920965  |
| 6 | 3.356072 | -2.438859 | -3.446818 |
| 6 | 3.214151 | -1.135092 | -4.067508 |
| 6 | 3.214250 | 0.429329  | 4.145185  |
| 6 | 3.077357 | -1.009587 | 4.038227  |
| 6 | 2.943653 | 1.699447  | -3.852230 |
| 6 | 2.813178 | 2.895783  | -3.045777 |
| 6 | 2.789364 | -3.369283 | 2.454747  |
| 6 | 2.639046 | -4.011586 | 1.166850  |
| 6 | 2.555485 | 4.163074  | -0.498631 |
| 6 | 2.426728 | 4.083356  | 0.938983  |
| 6 | 2.335705 | -3.851746 | -1.669096 |
| 6 | 2.186210 | -3.068514 | -2.873816 |
| 6 | 2.168164 | 2.534715  | 3.325258  |
| 6 | 2.035878 | 1.256050  | 3.982565  |
| 6 | 1.900531 | -0.539335 | -4.171086 |
| 6 | 1.763954 | 0.896322  | -4.105385 |
| 6 | 1.761530 | -1.585274 | 3.857935  |
| 6 | 1.616940 | -2.801023 | 3.093060  |
| 6 | 1.501305 | 3.302262  | -2.586393 |
| 6 | 1.371894 | 3.979843  | -1.317578 |
| 6 | 1.317312 | -4.141701 | 0.587848  |
| 6 | 1.164930 | -4.102243 | -0.848475 |
| 6 | 1.114843 | 3.902523  | 1.526420  |
| 6 | 0.985599 | 3.154057  | 2.757136  |
| 6 | 0.866968 | -2.624179 | -3.274410 |
| 6 | 0.723765 | -1.363003 | -3.969807 |
| 6 | 0.722937 | 0.665437  | 4.133251  |
| 6 | 0.586448 | -0.776700 | 4.113605  |
| 6 | 0.451897 | 1.479381  | -3.926247 |

|   |           |           |           |
|---|-----------|-----------|-----------|
| 6 | 0.320958  | 2.722163  | -3.191964 |
| 6 | 0.300535  | -3.224678 | 2.671905  |
| 6 | 0.151083  | -3.940899 | 1.419534  |
| 6 | 0.064054  | 4.131734  | -0.722331 |
| 6 | -0.064058 | 4.131750  | 0.722223  |
| 6 | -0.151085 | -3.940931 | -1.419440 |
| 6 | -0.300535 | -3.224738 | -2.671828 |
| 6 | -0.320958 | 2.722236  | 3.191891  |
| 6 | -0.451894 | 1.479473  | 3.926205  |
| 6 | -0.586445 | -0.776797 | -4.113591 |
| 6 | -0.722934 | 0.665340  | -4.133274 |
| 6 | -0.723762 | -1.362910 | 3.969840  |
| 6 | -0.866967 | -2.624102 | 3.274474  |
| 6 | -0.985600 | 3.153993  | -2.757221 |
| 6 | -1.114847 | 3.902486  | -1.526522 |
| 6 | -1.164933 | -4.102221 | 0.848573  |
| 6 | -1.317316 | -4.141710 | -0.587749 |
| 6 | -1.371897 | 3.979869  | 1.317474  |
| 6 | -1.501305 | 3.302319  | 2.586306  |
| 6 | -1.616939 | -2.801093 | -3.092994 |
| 6 | -1.761528 | -1.585364 | -3.857901 |
| 6 | -1.763950 | 0.896418  | 4.105363  |
| 6 | -1.900526 | -0.539237 | 4.171102  |
| 6 | -2.035876 | 1.255956  | -3.982606 |
| 6 | -2.168164 | 2.534636  | -3.325329 |
| 6 | -2.186210 | -3.068445 | 2.873892  |
| 6 | -2.335707 | -3.851703 | 1.669189  |
| 6 | -2.426731 | 4.083328  | -0.939088 |
| 6 | -2.555489 | 4.163078  | 0.498525  |
| 6 | -2.639049 | -4.011606 | -1.166754 |
| 6 | -2.789365 | -3.369336 | -2.454667 |
| 6 | -2.813176 | 2.895851  | 3.045704  |
| 6 | -2.943649 | 1.699537  | 3.852189  |
| 6 | -3.077355 | -1.009683 | -4.038212 |
| 6 | -3.214248 | 0.429230  | -4.145208 |
| 6 | -3.214147 | -1.134997 | 4.067542  |
| 6 | -3.356070 | -2.438777 | 3.446882  |
| 6 | -3.477386 | 2.995006  | -2.921047 |
| 6 | -3.606060 | 3.815882  | -1.731713 |
| 6 | -3.651915 | -4.052993 | 1.110901  |
| 6 | -3.803521 | -4.173747 | -0.327669 |
| 6 | -3.862128 | 4.050387  | 1.102092  |
| 6 | -3.990192 | 3.441567  | 2.412283  |
| 6 | -4.102915 | -2.975552 | -2.902527 |
| 6 | -4.247502 | -1.800736 | -3.739128 |
| 6 | -4.250428 | 1.128408  | 4.068424  |
| 6 | -4.385588 | -0.305151 | 4.219114  |
| 6 | -4.521898 | 1.027608  | -4.031411 |
| 6 | -4.654094 | 2.345335  | -3.449163 |
| 6 | -4.668947 | -2.905306 | 3.071319  |
| 6 | -4.817129 | -3.754561 | 1.912006  |
| 6 | -4.912974 | 4.026000  | -1.154300 |
| 6 | -5.041513 | 4.183020  | 0.275250  |
| 6 | -5.121141 | -4.070668 | -0.912147 |
| 6 | -5.272359 | -3.501779 | -2.229127 |
| 6 | -5.300566 | 3.053991  | 2.888854  |
| 6 | -5.430962 | 1.911425  | 3.759975  |
| 6 | -5.563809 | -1.233029 | -3.944092 |
| 6 | -5.701690 | 0.189980  | -4.135804 |
| 6 | -5.702487 | -0.907253 | 4.143505  |
| 6 | -5.844028 | -2.238421 | 3.604029  |
| 6 | -5.967956 | 2.825748  | -3.066811 |
| 6 | -6.097313 | 3.709439  | -1.932522 |
| 6 | -6.140318 | -3.983854 | 1.363354  |
| 6 | -6.292193 | -4.185220 | -0.060878 |
| 6 | -6.355246 | 4.100472  | 0.884189  |
| 6 | -6.483082 | 3.564511  | 2.222918  |
| 6 | -6.593572 | -3.134200 | -2.698664 |
| 6 | -6.738550 | -2.009066 | -3.599459 |
| 6 | -6.742723 | 1.353739  | 4.011948  |

|   |            |           |           |
|---|------------|-----------|-----------|
| 6 | -6.877966  | -0.071614 | 4.252023  |
| 6 | -7.013858  | 0.794838  | -4.061613 |
| 6 | -7.147010  | 2.151077  | -3.560940 |
| 6 | -7.158286  | -2.729480 | 3.262439  |
| 6 | -7.304128  | -3.650246 | 2.146577  |
| 6 | -7.404718  | 3.956357  | -1.371835 |
| 6 | -7.531186  | 4.192885  | 0.055639  |
| 6 | -7.605971  | -4.119698 | -0.648195 |
| 6 | -7.757389  | -3.622635 | -2.002194 |
| 6 | -7.788193  | 3.202833  | 2.717887  |
| 6 | -7.915606  | 2.105661  | 3.652800  |
| 6 | -8.048947  | -1.454377 | -3.831801 |
| 6 | -8.185024  | -0.040990 | -4.104239 |
| 6 | -8.186437  | -0.677412 | 4.208460  |
| 6 | -8.324630  | -2.033575 | 3.741695  |
| 6 | -8.453424  | 2.649978  | -3.203405 |
| 6 | -8.581154  | 3.589276  | -2.119796 |
| 6 | -8.619382  | -3.897537 | 1.606993  |
| 6 | -8.771838  | -4.169671 | 0.206036  |
| 6 | -8.839944  | 4.127679  | 0.665433  |
| 6 | -8.968212  | 3.665698  | 2.017251  |
| 6 | -9.076855  | -3.268592 | -2.479369 |
| 6 | -9.222403  | -2.205007 | -3.429279 |
| 6 | -9.232374  | 1.554404  | 3.923233  |
| 6 | -9.372813  | 0.161758  | 4.257014  |
| 6 | -9.503686  | 0.567886  | -4.051339 |
| 6 | -9.643209  | 1.942645  | -3.649616 |
| 6 | -9.654823  | -2.544850 | 3.431523  |
| 6 | -9.800100  | -3.528668 | 2.377271  |
| 6 | -9.905423  | 3.869275  | -1.576523 |
| 6 | -10.032839 | 4.184264  | -0.166535 |
| 6 | -10.103413 | -4.146557 | -0.381120 |
| 6 | -10.256946 | -3.726078 | -1.761290 |
| 6 | -10.286960 | 3.343123  | 2.534598  |
| 6 | -10.406279 | 2.299439  | 3.534276  |
| 6 | -10.546057 | -1.674278 | -3.702867 |
| 6 | -10.674808 | -0.275363 | -4.063534 |
| 6 | -10.694413 | -0.441467 | 4.311096  |
| 6 | -10.821247 | -1.876732 | 3.940007  |
| 6 | -10.962317 | 2.487875  | -3.377964 |
| 6 | -11.079586 | 3.540393  | -2.335863 |
| 6 | -11.108168 | -3.870466 | 1.888550  |
| 6 | -11.260524 | -4.231388 | 0.467097  |
| 6 | -11.334912 | 4.211905  | 0.447242  |
| 6 | -11.463987 | 3.806909  | 1.853221  |
| 6 | -11.568910 | -3.445474 | -2.282127 |
| 6 | -11.716070 | -2.412107 | -3.311805 |
| 6 | -11.707378 | 1.774637  | 3.868971  |
| 6 | -11.820219 | 0.422342  | 4.311390  |
| 6 | -11.978638 | 0.342373  | -4.078501 |
| 6 | -12.092592 | 1.734463  | -3.794253 |
| 6 | -12.092078 | -2.499790 | 3.682729  |
| 6 | -12.230578 | -3.475939 | 2.701677  |
| 6 | -12.348290 | 3.940084  | -1.781395 |
| 6 | -12.471688 | 4.279045  | -0.440780 |
| 6 | -12.548211 | -4.293125 | -0.184919 |
| 6 | -12.695830 | -3.929082 | -1.513597 |
| 6 | -12.749913 | 3.503722  | 2.460235  |
| 6 | -12.869323 | 2.540987  | 3.441094  |
| 6 | -13.010196 | -1.856423 | -3.679215 |
| 6 | -13.138863 | -0.539902 | -4.066447 |
| 1 | 14.134470  | -0.106637 | 4.235502  |
| 1 | 13.910861  | -2.469395 | 3.545775  |
| 1 | 13.861852  | 2.247186  | -3.809998 |
| 1 | 13.655053  | 3.974746  | -2.055697 |
| 1 | 13.704383  | -3.872963 | 1.942690  |
| 1 | 13.443176  | -4.516059 | -0.410156 |
| 1 | 13.472383  | 4.455312  | 0.025967  |
| 1 | 13.255696  | 3.854476  | 2.393104  |
| 1 | 13.236475  | -3.833031 | -2.445967 |

|   |            |           |           |
|---|------------|-----------|-----------|
| 1 | 12.993598  | -2.111667 | -4.174162 |
| 1 | 13.101109  | 2.146953  | 3.661783  |
| 1 | 12.829304  | 0.002452  | -4.412575 |
| 1 | -12.829304 | 0.002554  | 4.412601  |
| 1 | -13.101110 | 2.146858  | -3.661860 |
| 1 | -12.993593 | -2.111547 | 4.174237  |
| 1 | -13.236479 | -3.832929 | 2.446059  |
| 1 | -13.255705 | 3.854365  | -2.393183 |
| 1 | -13.472392 | 4.455245  | -0.026058 |
| 1 | -13.443185 | -4.515977 | 0.410274  |
| 1 | -13.704390 | -3.872959 | -1.942591 |
| 1 | -13.655053 | 3.974769  | 2.055619  |
| 1 | -13.861846 | 2.247273  | 3.809984  |
| 1 | -13.910860 | -2.469483 | -3.545750 |
| 1 | -14.134468 | -0.106746 | -4.235549 |

Nanotube (7,5) u10v08  
B3LYP/STO-3G Energy: -9651.794101

|   |            |           |           |
|---|------------|-----------|-----------|
| 6 | -13.209868 | 0.512395  | -4.148144 |
| 6 | -13.082458 | -0.859034 | -4.105397 |
| 6 | -13.003692 | 1.593430  | 3.900749  |
| 6 | -12.878088 | 2.772340  | 3.195889  |
| 6 | -12.782864 | -3.411557 | -2.530342 |
| 6 | -12.645462 | -4.099358 | -1.335855 |
| 6 | -12.578733 | 4.254466  | 0.586296  |
| 6 | -12.444330 | 4.265771  | -0.795100 |
| 6 | -12.351643 | -4.039633 | 1.666296  |
| 6 | -12.221954 | -3.344348 | 2.863503  |
| 6 | -12.169102 | 2.642665  | -3.299473 |
| 6 | -12.050699 | 1.368461  | -3.926113 |
| 6 | -11.958452 | -0.677249 | 4.214277  |
| 6 | -11.843895 | 0.742454  | 4.129440  |
| 6 | -11.790223 | -1.490541 | -3.879004 |
| 6 | -11.650077 | -2.750102 | -3.142815 |
| 6 | -11.587670 | 3.217910  | 2.694407  |
| 6 | -11.448430 | 3.964616  | 1.437716  |
| 6 | -11.362671 | -4.205480 | -0.678869 |
| 6 | -11.222077 | -4.216247 | 0.788391  |
| 6 | -11.170196 | 4.019279  | -1.422752 |
| 6 | -11.043016 | 3.265497  | -2.696469 |
| 6 | -10.953437 | -2.807927 | 3.280521  |
| 6 | -10.831254 | -1.513842 | 4.004075  |
| 6 | -10.745954 | 0.766238  | -4.057650 |
| 6 | -10.618123 | -0.678637 | -4.061634 |
| 6 | -10.540819 | 1.334052  | 3.948538  |
| 6 | -10.415330 | 2.596530  | 3.245934  |
| 6 | -10.341947 | -3.154569 | -2.699395 |
| 6 | -10.199034 | -3.910444 | -1.468940 |
| 6 | -10.141625 | 4.092990  | 0.847282  |
| 6 | -10.002790 | 4.144998  | -0.595668 |
| 6 | -9.918359  | -4.011009 | 1.358343  |
| 6 | -9.782543  | -3.326489 | 2.628775  |
| 6 | -9.721217  | 2.806212  | -3.086958 |
| 6 | -9.576411  | 1.577967  | -3.822646 |
| 6 | -9.510275  | -0.917472 | 4.114819  |
| 6 | -9.369114  | 0.514165  | 4.145268  |
| 6 | -9.296130  | -1.262156 | -3.919980 |
| 6 | -9.156916  | -2.531170 | -3.268661 |
| 6 | -9.093205  | 3.038428  | 2.836972  |
| 6 | -8.955285  | 3.826971  | 1.647206  |
| 6 | -8.872258  | -4.082154 | -0.895911 |
| 6 | -8.731322  | -4.173435 | 0.529083  |
| 6 | -8.673796  | 4.010658  | -1.181559 |
| 6 | -8.535958  | 3.376549  | -2.466135 |
| 6 | -8.455301  | -2.911104 | 3.068546  |
| 6 | -8.322284  | -1.717880 | 3.864193  |
| 6 | -8.256109  | 1.001235  | -4.016838 |

|   |           |           |           |
|---|-----------|-----------|-----------|
| 6 | -8.120156 | -0.434649 | -4.109721 |
| 6 | -8.050682 | 1.115024  | 4.032937  |
| 6 | -7.917650 | 2.412538  | 3.407126  |
| 6 | -7.840375 | -2.995355 | -2.885639 |
| 6 | -7.699322 | -3.818679 | -1.700643 |
| 6 | -7.641487 | 4.043846  | 1.084079  |
| 6 | -7.503573 | 4.176254  | -0.355493 |
| 6 | -7.420145 | -4.072184 | 1.124303  |
| 6 | -7.284118 | -3.464225 | 2.437859  |
| 6 | -7.225642 | 2.983931  | -2.928161 |
| 6 | -7.086368 | 1.798510  | -3.754795 |
| 6 | -7.014595 | -1.143723 | 4.070087  |
| 6 | -6.879444 | 0.295998  | 4.199500  |
| 6 | -6.810716 | -1.031072 | -4.014864 |
| 6 | -6.671667 | -2.347836 | -3.426777 |
| 6 | -6.609273 | 2.887238  | 3.030293  |
| 6 | -6.472149 | 3.744630  | 1.871651  |
| 6 | -6.390303 | -4.032368 | -1.138630 |
| 6 | -6.250141 | -4.198212 | 0.291625  |
| 6 | -6.191712 | 4.079002  | -0.950103 |
| 6 | -6.051996 | 3.510913  | -2.270069 |
| 6 | -5.973359 | -3.076731 | 2.903100  |
| 6 | -5.837551 | -1.925328 | 3.762820  |
| 6 | -5.772922 | 1.231115  | -3.968632 |
| 6 | -5.634511 | -0.194058 | -4.141850 |
| 6 | -5.566648 | 0.898443  | 4.106641  |
| 6 | -5.431300 | 2.224026  | 3.554184  |
| 6 | -5.353964 | -2.823132 | -3.054472 |
| 6 | -5.212859 | -3.706774 | -1.923574 |
| 6 | -5.153901 | 3.977836  | 1.313616  |
| 6 | -5.014067 | 4.187622  | -0.107536 |
| 6 | -4.931594 | -4.116058 | 0.891033  |
| 6 | -4.793383 | -3.587911 | 2.227933  |
| 6 | -4.734072 | 3.141716  | -2.750729 |
| 6 | -4.594918 | 2.014410  | -3.645620 |
| 6 | -4.521598 | -1.362507 | 3.997911  |
| 6 | -4.387037 | 0.061909  | 4.215586  |
| 6 | -4.318470 | -0.796141 | -4.075815 |
| 6 | -4.179241 | -2.144114 | -3.563082 |
| 6 | -4.117392 | 2.719043  | 3.201430  |
| 6 | -3.980422 | 3.639870  | 2.089597  |
| 6 | -3.899308 | -3.956091 | -1.373566 |
| 6 | -3.759440 | -4.203715 | 0.049492  |
| 6 | -3.702039 | 4.130516  | -0.709081 |
| 6 | -3.562548 | 3.636932  | -2.066249 |
| 6 | -3.483490 | -3.232807 | 2.719870  |
| 6 | -3.347791 | -2.128146 | 3.650770  |
| 6 | -3.285087 | 1.463521  | -3.896461 |
| 6 | -3.146842 | 0.043938  | -4.155572 |
| 6 | -3.079140 | 0.668441  | 4.161125  |
| 6 | -2.944470 | 2.030263  | 3.684997  |
| 6 | -2.868861 | -2.640004 | -3.219251 |
| 6 | -2.728579 | -3.588389 | -2.134899 |
| 6 | -2.669706 | 3.901986  | 1.544726  |
| 6 | -2.529965 | 4.188875  | 0.134650  |
| 6 | -2.448261 | -4.152208 | 0.651177  |
| 6 | -2.309067 | -3.698629 | 2.016028  |
| 6 | -2.249758 | 3.293052  | -2.563096 |
| 6 | -2.109796 | 2.221364  | -3.520302 |
| 6 | -2.035855 | -1.578616 | 3.911188  |
| 6 | -1.900492 | -0.173061 | 4.211200  |
| 6 | -1.831858 | -0.559514 | -4.114886 |
| 6 | -1.692150 | -1.929141 | -3.681949 |
| 6 | -1.629786 | 2.539157  | 3.353334  |
| 6 | -1.492071 | 3.516440  | 2.299525  |
| 6 | -1.411675 | -3.862314 | -1.596776 |
| 6 | -1.271020 | -4.188043 | -0.196873 |
| 6 | -1.213168 | 4.162194  | -0.469160 |
| 6 | -1.072764 | 3.748795  | -1.847126 |
| 6 | -0.993176 | -3.370397 | 2.525832  |

|   |           |           |           |
|---|-----------|-----------|-----------|
| 6 | -0.856400 | -2.325647 | 3.516900  |
| 6 | -0.793912 | 1.686674  | -3.803272 |
| 6 | -0.655088 | 0.286988  | -4.146753 |
| 6 | -0.587196 | 0.435583  | 4.194604  |
| 6 | -0.452598 | 1.823562  | 3.800589  |
| 6 | -0.377935 | -2.447081 | -3.370690 |
| 6 | -0.238282 | -3.458206 | -2.341133 |
| 6 | -0.179769 | 3.814924  | 1.772768  |
| 6 | -0.040849 | 4.181700  | 0.376537  |
| 6 | 0.040848  | -4.178832 | 0.407123  |
| 6 | 0.179769  | -3.801852 | 1.800633  |
| 6 | 0.238282  | 3.440985  | -2.366372 |
| 6 | 0.377935  | 2.422355  | -3.388504 |
| 6 | 0.452598  | -1.795706 | 3.813829  |
| 6 | 0.587196  | -0.404881 | 4.197679  |
| 6 | 0.655088  | -0.317319 | -4.144542 |
| 6 | 0.793912  | -1.714455 | -3.790830 |
| 6 | 0.856400  | 2.351316  | 3.499790  |
| 6 | 0.993176  | 3.388788  | 2.501104  |
| 6 | 1.072764  | -3.762208 | -1.819648 |
| 6 | 1.213168  | -4.165516 | -0.438694 |
| 6 | 1.271019  | 4.186492  | -0.227510 |
| 6 | 1.411675  | 3.850529  | -1.624992 |
| 6 | 1.492071  | -3.499521 | 2.325191  |
| 6 | 1.629786  | -2.514554 | 3.371822  |
| 6 | 1.692150  | 1.902152  | -3.695964 |
| 6 | 1.831858  | 0.529393  | -4.118868 |
| 6 | 1.900492  | 0.203868  | 4.209820  |
| 6 | 2.035855  | 1.607190  | 3.899532  |
| 6 | 2.109796  | -2.247060 | -3.503954 |
| 6 | 2.249758  | -3.311717 | -2.538933 |
| 6 | 2.309067  | 3.713281  | 1.988913  |
| 6 | 2.448261  | 4.156863  | 0.620780  |
| 6 | 2.529965  | -4.187778 | 0.165295  |
| 6 | 2.669705  | -3.890580 | 1.573233  |
| 6 | 2.728579  | 3.572674  | -2.161096 |
| 6 | 2.868861  | 2.616381  | -3.238480 |
| 6 | 2.944470  | -2.003247 | 3.699752  |
| 6 | 3.079140  | -0.637978 | 4.165903  |
| 6 | 3.146843  | -0.074340 | -4.155138 |
| 6 | 3.285086  | -1.491990 | -3.885647 |
| 6 | 3.347791  | 2.154801  | 3.635100  |
| 6 | 3.483490  | 3.252621  | 2.696144  |
| 6 | 3.562547  | -3.651952 | -2.039584 |
| 6 | 3.702038  | -4.135595 | -0.678841 |
| 6 | 3.759440  | 4.203966  | 0.018734  |
| 6 | 3.899308  | 3.945937  | -1.402474 |
| 6 | 3.980422  | -3.624484 | 2.116172  |
| 6 | 4.117392  | -2.695547 | 3.221237  |
| 6 | 4.179241  | 2.117989  | -3.578672 |
| 6 | 4.318470  | 0.766300  | -4.081529 |
| 6 | 4.387038  | -0.031064 | 4.215924  |
| 6 | 4.521598  | 1.391721  | 3.987834  |
| 6 | 4.594918  | -2.041029 | -3.630783 |
| 6 | 4.734071  | -3.161758 | -2.727669 |
| 6 | 4.793383  | 3.604117  | 2.201622  |
| 6 | 4.931594  | 4.122470  | 0.860894  |
| 6 | 5.014067  | -4.188298 | -0.076895 |
| 6 | 5.153901  | -3.968120 | 1.342684  |
| 6 | 5.212859  | 3.692602  | -1.950642 |
| 6 | 5.353964  | 2.800710  | -3.075044 |
| 6 | 5.431301  | -2.197962 | 3.570359  |
| 6 | 5.566648  | -0.868372 | 4.113102  |
| 6 | 5.634511  | 0.163750  | -4.143157 |
| 6 | 5.772922  | -1.260118 | -3.959517 |
| 6 | 5.837550  | 1.952808  | 3.748632  |
| 6 | 5.973359  | 3.097892  | 2.880512  |
| 6 | 6.051995  | -3.527429 | -2.244321 |
| 6 | 6.191711  | -4.085846 | -0.920234 |
| 6 | 6.250141  | 4.200236  | 0.260901  |



|   |            |           |           |
|---|------------|-----------|-----------|
| 6 | 6.390303   | 4.023931  | -1.168102 |
| 6 | 6.472149   | -3.730837 | 1.898998  |
| 6 | 6.609273   | -2.864990 | 3.051334  |
| 6 | 6.671668   | 2.322701  | -3.443861 |
| 6 | 6.810717   | 1.001670  | -4.022298 |
| 6 | 6.879444   | -0.265263 | 4.201550  |
| 6 | 7.014595   | 1.173472  | 4.061607  |
| 6 | 7.086367   | -1.825934 | -3.741534 |
| 6 | 7.225641   | -3.005276 | -2.906251 |
| 6 | 7.284118   | 3.481971  | 2.412448  |
| 6 | 7.420145   | 4.080304  | 1.094480  |
| 6 | 7.503572   | -4.178746 | -0.324929 |
| 6 | 7.641487   | -4.035809 | 1.113635  |
| 6 | 7.699323   | 3.806135  | -1.728536 |
| 6 | 7.840376   | 2.974162  | -2.907475 |
| 6 | 7.917650   | -2.387544 | 3.424683  |
| 6 | 8.050682   | -1.085487 | 4.040982  |
| 6 | 8.120156   | 0.404568  | -4.112789 |
| 6 | 8.256108   | -1.030598 | -4.009403 |
| 6 | 8.322283   | 1.746107  | 3.851518  |
| 6 | 8.455301   | 2.933478  | 3.047165  |
| 6 | 8.535957   | -3.394504 | -2.441365 |
| 6 | 8.673796   | -4.019199 | -1.152185 |
| 6 | 8.731323   | 4.177196  | 0.498535  |
| 6 | 8.872259   | 4.075491  | -0.925753 |
| 6 | 8.955286   | -3.814817 | 1.675160  |
| 6 | 9.093206   | -3.017589 | 2.859123  |
| 6 | 9.156918   | 2.507186  | -3.287089 |
| 6 | 9.296130   | 1.233440  | -3.929106 |
| 6 | 9.369113   | -0.483822 | 4.148915  |
| 6 | 9.510275   | 0.947554  | 4.107993  |
| 6 | 9.576410   | -1.605894 | -3.810996 |
| 6 | 9.721216   | -2.828724 | -3.066344 |
| 6 | 9.782543   | 3.345636  | 2.604367  |
| 6 | 9.918360   | 4.020842  | 1.328961  |
| 6 | 10.002790  | -4.149248 | -0.565327 |
| 6 | 10.141625  | -4.086683 | 0.877204  |
| 6 | 10.199036  | 3.899590  | -1.497509 |
| 6 | 10.341949  | 3.134731  | -2.722399 |
| 6 | 10.415330  | -2.572710 | 3.264840  |
| 6 | 10.540818  | -1.305125 | 3.958187  |
| 6 | 10.618124  | 0.648900  | -4.066485 |
| 6 | 10.745954  | -0.795907 | -4.051932 |
| 6 | 10.831253  | 1.543099  | 3.992892  |
| 6 | 10.953437  | 2.831856  | 3.259891  |
| 6 | 11.043015  | -3.285143 | -2.672507 |
| 6 | 11.170195  | -4.029585 | -1.393309 |
| 6 | 11.222077  | 4.221904  | 0.757524  |
| 6 | 11.362672  | 4.200399  | -0.709618 |
| 6 | 11.448431  | -3.953990 | 1.466682  |
| 6 | 11.587671  | -3.198107 | 2.717874  |
| 6 | 11.650079  | 2.727030  | -3.162847 |
| 6 | 11.790224  | 1.462116  | -3.889800 |
| 6 | 11.843895  | -0.712220 | 4.134761  |
| 6 | 11.958451  | 0.708065  | 4.209217  |
| 6 | 12.050698  | -1.397154 | -3.915996 |
| 6 | 12.169100  | -2.666743 | -3.280057 |
| 6 | 12.221954  | 3.365212  | 2.838960  |
| 6 | 12.351643  | 4.051717  | 1.636697  |
| 6 | 12.444329  | -4.271478 | -0.763871 |
| 6 | 12.578734  | -4.250063 | 0.617405  |
| 6 | 12.645463  | 4.089475  | -1.365811 |
| 6 | 12.782865  | 3.392950  | -2.555232 |
| 6 | 12.878089  | -2.748879 | 3.216084  |
| 6 | 13.003691  | -1.564846 | 3.912305  |
| 6 | 13.082458  | 0.828969  | -4.111567 |
| 6 | 13.209867  | -0.542736 | -4.144285 |
| 1 | -14.204623 | 0.975105  | -4.211577 |
| 1 | -13.983079 | -1.485628 | -4.139963 |
| 1 | -13.998530 | 1.217145  | 4.177008  |

|   |            |           |           |
|---|------------|-----------|-----------|
| 1 | -13.780540 | 3.331720  | 2.917312  |
| 1 | -13.787908 | -3.248499 | -2.939999 |
| 1 | -13.544700 | -4.465386 | -0.823674 |
| 1 | -13.582862 | 4.320667  | 1.024391  |
| 1 | -13.346630 | 4.338465  | -1.416108 |
| 1 | -13.355045 | -4.319823 | 1.320649  |
| 1 | -13.127538 | -3.092998 | 3.430821  |
| 1 | -13.179135 | 3.009032  | -3.075564 |
| 1 | -12.967654 | -1.108493 | 4.198655  |
| 1 | 12.967642  | 1.139185  | 4.190474  |
| 1 | 13.179126  | -3.031475 | -3.053494 |
| 1 | 13.127537  | 3.118022  | 3.408104  |
| 1 | 13.355047  | 4.329373  | 1.289009  |
| 1 | 13.346628  | -4.348719 | -1.384331 |
| 1 | 13.582862  | -4.313062 | 1.055972  |
| 1 | 13.544700  | 4.459247  | -0.856325 |
| 1 | 13.787907  | 3.226911  | -2.963692 |
| 1 | 13.780541  | -3.310279 | 2.941603  |
| 1 | 13.998529  | -1.186549 | 4.185802  |
| 1 | 13.983080  | 1.455292  | -4.150716 |
| 1 | 14.204622  | -1.005897 | -4.204335 |

Nanotube (7,5) u10v09  
B3LYP/STO-3G Energy: -9727.091671

|   |           |           |           |
|---|-----------|-----------|-----------|
| 6 | 13.341788 | 3.799747  | -1.585054 |
| 6 | 13.218421 | 4.116320  | -0.249929 |
| 6 | 13.075436 | -4.251674 | -0.538890 |
| 6 | 12.950800 | -3.876896 | -1.860083 |
| 6 | 12.915967 | 3.262162  | 2.624815  |
| 6 | 12.772640 | 2.288639  | 3.599211  |
| 6 | 12.665020 | -1.739711 | -3.968933 |
| 6 | 12.540467 | -0.407946 | -4.338150 |
| 6 | 12.458026 | -0.624073 | 4.320968  |
| 6 | 12.317765 | -1.959366 | 3.960578  |
| 6 | 12.287976 | 2.434163  | -3.419821 |
| 6 | 12.178192 | 3.370806  | -2.352560 |
| 6 | 12.035506 | -3.955201 | 1.736509  |
| 6 | 11.916751 | -4.241625 | 0.344353  |
| 6 | 11.926242 | 4.071609  | 0.420527  |
| 6 | 11.785005 | 3.689872  | 1.827852  |
| 6 | 11.662065 | -3.498122 | -2.418846 |
| 6 | 11.529336 | -2.478042 | -3.465921 |
| 6 | 11.485314 | 1.690994  | 3.873803  |
| 6 | 11.334811 | 0.278367  | 4.265129  |
| 6 | 11.271219 | 0.272240  | -4.261002 |
| 6 | 11.155469 | 1.698495  | -3.863619 |
| 6 | 11.044190 | -2.491936 | 3.552566  |
| 6 | 10.912454 | -3.525912 | 2.491574  |
| 6 | 10.876062 | 3.664875  | -1.803791 |
| 6 | 10.752810 | 4.045933  | -0.409574 |
| 6 | 10.612764 | -4.211231 | -0.272142 |
| 6 | 10.487947 | -3.860411 | -1.673892 |
| 6 | 10.475067 | 3.377036  | 2.335672  |
| 6 | 10.326254 | 2.386286  | 3.385700  |
| 6 | 10.226326 | -1.931304 | -3.741867 |
| 6 | 10.097699 | -0.550142 | -4.166665 |
| 6 | 10.026603 | -0.315626 | 4.217139  |
| 6 | 9.879779  | -1.719300 | 3.886116  |
| 6 | 9.838247  | 2.205244  | -3.520056 |
| 6 | 9.702550  | 3.235938  | -2.524913 |
| 6 | 9.589004  | -3.778101 | 1.946448  |
| 6 | 9.442703  | -4.178800 | 0.572244  |
| 6 | 9.431851  | 4.070830  | 0.192420  |
| 6 | 9.292174  | 3.773104  | 1.587154  |
| 6 | 9.167380  | -3.569956 | -2.204940 |
| 6 | 9.035386  | -2.625179 | -3.275221 |
| 6 | 8.996233  | 1.887217  | 3.701817  |

|   |          |           |           |
|---|----------|-----------|-----------|
| 6 | 8.845964 | 0.536252  | 4.160068  |
| 6 | 8.773402 | 0.060907  | -4.186801 |
| 6 | 8.646708 | 1.466484  | -3.907856 |
| 6 | 8.548095 | -2.241745 | 3.600760  |
| 6 | 8.405354 | -3.318624 | 2.655833  |
| 6 | 8.385203 | 3.583271  | -2.016620 |
| 6 | 8.254301 | 4.047270  | -0.654689 |
| 6 | 8.122657 | -4.216196 | -0.035389 |
| 6 | 7.989533 | -3.948508 | -1.450309 |
| 6 | 7.974017 | 3.533546  | 2.136655  |
| 6 | 7.827606 | 2.604768  | 3.239682  |
| 6 | 7.724373 | -2.127459 | -3.629135 |
| 6 | 7.596400 | -0.771134 | -4.130819 |
| 6 | 7.529953 | -0.055102 | 4.218945  |
| 6 | 7.382895 | -1.480183 | 3.973293  |
| 6 | 7.340607 | 2.025014  | -3.647382 |
| 6 | 7.210919 | 3.132248  | -2.717324 |
| 6 | 7.093991 | -3.657151 | 2.157017  |
| 6 | 6.952897 | -4.155397 | 0.800602  |
| 6 | 6.945850 | 4.120992  | -0.052415 |
| 6 | 6.806949 | 3.896603  | 1.372335  |
| 6 | 6.682097 | -3.698279 | -2.004980 |
| 6 | 6.550536 | -2.801273 | -3.134212 |
| 6 | 6.515519 | 2.127574  | 3.594239  |
| 6 | 6.366409 | 0.790448  | 4.126420  |
| 6 | 6.289395 | -0.161504 | -4.190143 |
| 6 | 6.161036 | 1.261955  | -3.984212 |
| 6 | 6.067996 | -2.020448 | 3.722174  |
| 6 | 5.922216 | -3.148624 | 2.833660  |
| 6 | 5.901015 | 3.496213  | -2.223386 |
| 6 | 5.768165 | 4.034647  | -0.891966 |
| 6 | 5.638872 | -4.211949 | 0.196591  |
| 6 | 5.502842 | -4.021972 | -1.226616 |
| 6 | 5.488304 | 3.670088  | 1.929670  |
| 6 | 5.342480 | 2.809203  | 3.077002  |
| 6 | 5.235643 | -2.312464 | -3.502345 |
| 6 | 5.105519 | -0.994196 | -4.074070 |
| 6 | 5.043563 | 0.199994  | 4.204515  |
| 6 | 4.894489 | -1.226573 | 4.042152  |
| 6 | 4.847667 | 1.832149  | -3.750611 |
| 6 | 4.718222 | 2.989457  | -2.894501 |
| 6 | 4.602373 | -3.511542 | 2.352909  |
| 6 | 4.461031 | -4.090204 | 1.034659  |
| 6 | 4.453057 | 4.136671  | -0.291637 |
| 6 | 4.314448 | 3.992990  | 1.142914  |
| 6 | 4.189116 | -3.799342 | -1.794370 |
| 6 | 4.057154 | -2.964745 | -2.972196 |
| 6 | 4.025535 | 2.352667  | 3.462736  |
| 6 | 3.877144 | 1.044420  | 4.072429  |
| 6 | 3.797578 | -0.388188 | -4.174169 |
| 6 | 3.669525 | 1.051460  | -4.050425 |
| 6 | 3.579778 | -1.784372 | 3.829718  |
| 6 | 3.433647 | -2.969058 | 3.004761  |
| 6 | 3.411465 | 3.385053  | -2.426331 |
| 6 | 3.279258 | 4.004588  | -1.122281 |
| 6 | 3.151067 | -4.185213 | 0.436909  |
| 6 | 3.014956 | -4.078143 | -1.001955 |
| 6 | 3.003135 | 3.799749  | 1.712950  |
| 6 | 2.858845 | 3.000557  | 2.911366  |
| 6 | 2.749642 | -2.496844 | -3.365755 |
| 6 | 2.619594 | -1.208789 | -4.010139 |
| 6 | 2.562178 | 0.459808  | 4.181921  |
| 6 | 2.412449 | -0.975136 | 4.099183  |
| 6 | 2.361802 | 1.630972  | -3.846543 |
| 6 | 2.231831 | 2.834526  | -3.059512 |
| 6 | 2.118348 | -3.353052 | 2.543775  |
| 6 | 1.975498 | -4.005643 | 1.264194  |
| 6 | 1.965971 | 4.131107  | -0.527341 |
| 6 | 1.827436 | 4.069537  | 0.907746  |
| 6 | 1.701038 | -3.878785 | -1.577314 |

|   |           |           |           |
|---|-----------|-----------|-----------|
| 6 | 1.567899  | -3.114959 | -2.794672 |
| 6 | 1.539271  | 2.561537  | 3.317572  |
| 6 | 1.390694  | 1.296532  | 3.997265  |
| 6 | 1.307505  | -0.608275 | -4.139947 |
| 6 | 1.178512  | 0.830052  | -4.099388 |
| 6 | 1.091865  | -1.543051 | 3.916979  |
| 6 | 0.944306  | -2.769369 | 3.165581  |
| 6 | 0.919205  | 3.256031  | -2.614638 |
| 6 | 0.786591  | 3.950544  | -1.351976 |
| 6 | 0.659296  | -4.136077 | 0.674032  |
| 6 | 0.522288  | -4.114341 | -0.767620 |
| 6 | 0.512042  | 3.912472  | 1.490307  |
| 6 | 0.368932  | 3.183113  | 2.734737  |
| 6 | 0.257765  | -2.673328 | -3.218521 |
| 6 | 0.128341  | -1.420950 | -3.937246 |
| 6 | 0.074634  | 0.720699  | 4.149003  |
| 6 | -0.074635 | -0.721963 | 4.148783  |
| 6 | -0.128341 | 1.422145  | -3.936815 |
| 6 | -0.257765 | 2.674305  | -3.217710 |
| 6 | -0.368932 | -3.183948 | 2.733771  |
| 6 | -0.512041 | -3.912929 | 1.489120  |
| 6 | -0.522287 | 4.114572  | -0.766370 |
| 6 | -0.659295 | 4.135870  | 0.675288  |
| 6 | -0.786591 | -3.950136 | -1.353175 |
| 6 | -0.919205 | -3.255238 | -2.615626 |
| 6 | -0.944306 | 2.768403  | 3.166421  |
| 6 | -1.091866 | 1.541857  | 3.917446  |
| 6 | -1.178512 | -0.828808 | -4.099638 |
| 6 | -1.307505 | 0.609532  | -4.139762 |
| 6 | -1.390695 | -1.297750 | 3.996871  |
| 6 | -1.539271 | -2.562549 | 3.316794  |
| 6 | -1.567898 | 3.115808  | -2.793726 |
| 6 | -1.701037 | 3.879264  | -1.576136 |
| 6 | -1.827435 | -4.069817 | 0.906511  |
| 6 | -1.965971 | -4.130949 | -0.528595 |
| 6 | -1.975497 | 4.005256  | 1.265410  |
| 6 | -2.118347 | 3.352276  | 2.544793  |
| 6 | -2.231831 | -2.833597 | -3.060371 |
| 6 | -2.361803 | -1.629804 | -3.847037 |
| 6 | -2.412450 | 0.973887  | 4.099477  |
| 6 | -2.562179 | -0.461082 | 4.181780  |
| 6 | -2.619594 | 1.210007  | -4.009772 |
| 6 | -2.749641 | 2.497867  | -3.364997 |
| 6 | -2.858845 | -3.001447 | 2.910456  |
| 6 | -3.003135 | -3.800274 | 1.711796  |
| 6 | -3.014955 | 4.078447  | -1.000716 |
| 6 | -3.151066 | 4.185080  | 0.438179  |
| 6 | -3.279258 | -4.004250 | -1.123496 |
| 6 | -3.411466 | -3.384316 | -2.427358 |
| 6 | -3.433647 | 2.968142  | 3.005661  |
| 6 | -3.579778 | 1.783205  | 3.830258  |
| 6 | -3.669525 | -1.050229 | -4.050741 |
| 6 | -3.797578 | 0.389457  | -4.174049 |
| 6 | -3.877145 | -1.045661 | 4.072110  |
| 6 | -4.025536 | -2.353723 | 3.462022  |
| 6 | -4.057153 | 2.965650  | -2.971295 |
| 6 | -4.189114 | 3.799890  | -1.793216 |
| 6 | -4.314448 | -3.993343 | 1.141703  |
| 6 | -4.453057 | -4.136586 | -0.292892 |
| 6 | -4.461029 | 4.089890  | 1.035901  |
| 6 | -4.602372 | 3.510826  | 2.353974  |
| 6 | -4.718223 | -2.988577 | -2.895406 |
| 6 | -4.847668 | -1.831008 | -3.751163 |
| 6 | -4.894490 | 1.225342  | 4.042521  |
| 6 | -5.043564 | -0.201274 | 4.204451  |
| 6 | -5.105519 | 0.995435  | -4.073766 |
| 6 | -5.235642 | 2.313530  | -3.501642 |
| 6 | -5.342480 | -2.810142 | 3.076149  |
| 6 | -5.488305 | -3.670680 | 1.928556  |
| 6 | -5.502840 | 4.022349  | -1.225395 |

|   |            |           |           |
|---|------------|-----------|-----------|
| 6 | -5.638870  | 4.211892  | 0.197870  |
| 6 | -5.768166  | -4.034379 | -0.893189 |
| 6 | -5.901016  | -3.495538 | -2.224445 |
| 6 | -5.922216  | 3.147762  | 2.834614  |
| 6 | -6.067996  | 2.019315  | 3.722783  |
| 6 | -6.161037  | -1.260742 | -3.984589 |
| 6 | -6.289395  | 0.162779  | -4.190089 |
| 6 | -6.366410  | -0.791704 | 4.126177  |
| 6 | -6.515519  | -2.128670 | 3.593593  |
| 6 | -6.550535  | 2.802229  | -3.133360 |
| 6 | -6.682095  | 3.698894  | -2.003858 |
| 6 | -6.806949  | -3.897026 | 1.371154  |
| 6 | -6.945850  | -4.120981 | -0.053665 |
| 6 | -6.952895  | 4.155158  | 0.801863  |
| 6 | -7.093990  | 3.656497  | 2.158125  |
| 6 | -7.210920  | -3.131420 | -2.718270 |
| 6 | -7.340608  | -2.023902 | -3.647990 |
| 6 | -7.382895  | 1.478974  | 3.973737  |
| 6 | -7.529954  | 0.053818  | 4.218957  |
| 6 | -7.596400  | 0.772393  | -4.130580 |
| 6 | -7.724373  | 2.128567  | -3.628487 |
| 6 | -7.827607  | -2.605756 | 3.238892  |
| 6 | -7.974017  | -3.534201 | 2.135584  |
| 6 | -7.989530  | 3.948956  | -1.449111 |
| 6 | -8.122654  | 4.216213  | -0.034110 |
| 6 | -8.254301  | -4.047074 | -0.655915 |
| 6 | -8.385204  | -3.582657 | -2.017703 |
| 6 | -8.405354  | 3.317818  | 2.656837  |
| 6 | -8.548096  | 2.240650  | 3.601434  |
| 6 | -8.646709  | -1.465292 | -3.908292 |
| 6 | -8.773402  | -0.059630 | -4.186812 |
| 6 | -8.845966  | -0.537518 | 4.159901  |
| 6 | -8.996234  | -1.888345 | 3.701242  |
| 6 | -9.035385  | 2.626182  | -3.274424 |
| 6 | -9.167378  | 3.570635  | -2.203858 |
| 6 | -9.292175  | -3.773592 | 1.586010  |
| 6 | -9.431852  | -4.070894 | 0.191186  |
| 6 | -9.442701  | 4.178634  | 0.573511  |
| 6 | -9.589003  | 3.777514  | 1.947592  |
| 6 | -9.702551  | -3.235168 | -2.525890 |
| 6 | -9.838248  | -2.204169 | -3.520717 |
| 6 | -9.879780  | 1.718118  | 3.886630  |
| 6 | -10.026604 | 0.314343  | 4.217228  |
| 6 | -10.097700 | 0.551413  | -4.166492 |
| 6 | -10.226325 | 1.932448  | -3.741279 |
| 6 | -10.326255 | -2.387318 | 3.384976  |
| 6 | -10.475068 | -3.377752 | 2.334649  |
| 6 | -10.487944 | 3.860934  | -1.672723 |
| 6 | -10.612761 | 4.211327  | -0.270865 |
| 6 | -10.752811 | -4.045813 | -0.410800 |
| 6 | -10.876063 | -3.664326 | -1.804900 |
| 6 | -10.912454 | 3.525156  | 2.492638  |
| 6 | -11.044191 | 2.490854  | 3.553312  |
| 6 | -11.155469 | -1.697317 | -3.864127 |
| 6 | -11.271220 | -0.270940 | -4.261077 |
| 6 | -11.334812 | -0.279664 | 4.265037  |
| 6 | -11.485314 | -1.692174 | 3.873287  |
| 6 | -11.529335 | 2.479106  | -3.465169 |
| 6 | -11.662061 | 3.498872  | -2.417787 |
| 6 | -11.785006 | -3.690434 | 1.826735  |
| 6 | -11.926243 | -4.071743 | 0.419294  |
| 6 | -11.916749 | 4.241531  | 0.345637  |
| 6 | -12.035512 | 3.954669  | 1.737705  |
| 6 | -12.178193 | -3.370090 | -2.353581 |
| 6 | -12.287969 | -2.433128 | -3.420560 |
| 6 | -12.317767 | 1.958159  | 3.961153  |
| 6 | -12.458028 | 0.622757  | 4.321141  |
| 6 | -12.540468 | 0.409270  | -4.338015 |
| 6 | -12.665021 | 1.740927  | -3.968396 |
| 6 | -12.772640 | -2.289737 | 3.598517  |

|   |            |           |           |
|---|------------|-----------|-----------|
| 6 | -12.915967 | -3.262967 | 2.623829  |
| 6 | -12.950796 | 3.877479  | -1.858911 |
| 6 | -13.075433 | 4.251854  | -0.537603 |
| 6 | -13.218423 | -4.116247 | -0.251177 |
| 6 | -13.341789 | -3.799268 | -1.586207 |
| 1 | 14.335270  | 3.734010  | -2.049915 |
| 1 | 14.121023  | 4.306750  | 0.345025  |
| 1 | 14.069381  | -4.429097 | -0.105230 |
| 1 | 13.853043  | -3.761105 | -2.474452 |
| 1 | 13.923033  | 3.608778  | 2.360126  |
| 1 | 13.669243  | 1.882915  | 4.085408  |
| 1 | 13.665480  | -2.188341 | -3.921597 |
| 1 | 13.446622  | 0.165871  | -4.571922 |
| 1 | 13.464449  | -0.225137 | 4.501542  |
| 1 | 13.218317  | -2.579735 | 3.864681  |
| 1 | 13.295061  | 2.115681  | -3.717823 |
| 1 | 13.046131  | -3.836524 | 2.147889  |
| 1 | -13.046141 | 3.835835  | 2.149036  |
| 1 | -13.295052 | -2.114574 | -3.718488 |
| 1 | -13.218320 | 2.578554  | 3.865433  |
| 1 | -13.464453 | 0.223765  | 4.501585  |
| 1 | -13.446624 | -0.164478 | -4.571953 |
| 1 | -13.665482 | 2.189536  | -3.920909 |
| 1 | -13.669243 | -1.884163 | 4.084840  |
| 1 | -13.923033 | -3.609508 | 2.359040  |
| 1 | -13.853039 | 3.761875  | -2.473317 |
| 1 | -14.069377 | 4.429144  | -0.103892 |
| 1 | -14.121025 | -4.306856 | 0.343720  |
| 1 | -14.335269 | -3.733387 | -2.051048 |

Nanotube (7,5) u10v10  
B3LYP/STO-3G Energy: -9802.389033

|   |            |           |           |
|---|------------|-----------|-----------|
| 6 | -13.431066 | -3.332256 | -2.475798 |
| 6 | -13.299115 | -3.980466 | -1.267655 |
| 6 | -13.207189 | 4.183624  | 0.599714  |
| 6 | -13.086546 | 4.161621  | -0.773484 |
| 6 | -12.987566 | -3.891306 | 1.728950  |
| 6 | -12.845345 | -3.199379 | 2.919624  |
| 6 | -12.798489 | 2.638429  | -3.360329 |
| 6 | -12.667944 | 1.446979  | -4.058821 |
| 6 | -12.545124 | -0.566736 | 4.362323  |
| 6 | -12.414692 | 0.816936  | 4.356163  |
| 6 | -12.394661 | -1.533354 | -3.900873 |
| 6 | -12.273687 | -2.711790 | -3.110953 |
| 6 | -12.154961 | 3.318939  | 2.719051  |
| 6 | -12.044165 | 3.954288  | 1.447326  |
| 6 | -12.003576 | -4.100151 | -0.612217 |
| 6 | -11.857688 | -4.091781 | 0.844907  |
| 6 | -11.797981 | 3.947336  | -1.414766 |
| 6 | -11.664334 | 3.231117  | -2.688468 |
| 6 | -11.559991 | -2.682626 | 3.334111  |
| 6 | -11.416277 | -1.416871 | 4.073809  |
| 6 | -11.393955 | 0.778589  | -4.162906 |
| 6 | -11.268121 | -0.700689 | -4.145093 |
| 6 | -11.145785 | 1.445359  | 4.095097  |
| 6 | -11.025408 | 2.717831  | 3.335137  |
| 6 | -10.966966 | -3.128252 | -2.660811 |
| 6 | -10.834462 | -3.854071 | -1.411801 |
| 6 | -10.742807 | 4.092637  | 0.839818  |
| 6 | -10.622501 | 4.114526  | -0.605444 |
| 6 | -10.547124 | -3.910841 | 1.411992  |
| 6 | -10.399176 | -3.221569 | 2.680714  |
| 6 | -10.359514 | 2.782725  | -3.099879 |
| 6 | -10.224997 | 1.557464  | -3.865117 |
| 6 | -10.111973 | -0.821372 | 4.176386  |
| 6 | -9.975385  | 0.621386  | 4.216111  |
| 6 | -9.946505  | -1.269639 | -3.947829 |

|   |           |           |           |
|---|-----------|-----------|-----------|
| 6 | -9.799853 | -2.520291 | -3.251229 |
| 6 | -9.706317 | 3.111041  | 2.869244  |
| 6 | -9.568823 | 3.852333  | 1.643783  |
| 6 | -9.510610 | -4.023261 | -0.840599 |
| 6 | -9.365775 | -4.092606 | 0.583101  |
| 6 | -9.302942 | 3.978892  | -1.197308 |
| 6 | -9.170533 | 3.341510  | -2.474364 |
| 6 | -9.070796 | -2.810514 | 3.109865  |
| 6 | -8.926600 | -1.621621 | 3.898684  |
| 6 | -8.897290 | 0.980999  | -4.045223 |
| 6 | -8.761154 | -0.447634 | -4.136589 |
| 6 | -8.648250 | 1.208922  | 4.070014  |
| 6 | -8.516525 | 2.492688  | 3.433062  |
| 6 | -8.477782 | -2.977224 | -2.853249 |
| 6 | -8.337235 | -3.774237 | -1.657178 |
| 6 | -8.251662 | 4.053391  | 1.061917  |
| 6 | -8.123500 | 4.158870  | -0.374136 |
| 6 | -8.045938 | -3.992481 | 1.171542  |
| 6 | -7.899691 | -3.377171 | 2.475092  |
| 6 | -7.857896 | 2.960116  | -2.948237 |
| 6 | -7.724520 | 1.779225  | -3.781447 |
| 6 | -7.613433 | -1.055751 | 4.103334  |
| 6 | -7.476375 | 0.385275  | 4.231319  |
| 6 | -7.450248 | -1.045437 | -4.032935 |
| 6 | -7.309571 | -2.353375 | -3.418902 |
| 6 | -7.209292 | 2.957566  | 3.034247  |
| 6 | -7.077539 | 3.788370  | 1.850943  |
| 6 | -7.025266 | -3.991318 | -1.098322 |
| 6 | -6.880508 | -4.139230 | 0.335947  |
| 6 | -6.817120 | 4.068677  | -0.978552 |
| 6 | -6.685705 | 3.492456  | -2.300765 |
| 6 | -6.588764 | -2.997867 | 2.936312  |
| 6 | -6.445368 | -1.840971 | 3.793617  |
| 6 | -6.414513 | 1.214276  | -3.999757 |
| 6 | -6.277150 | -0.213553 | -4.166630 |
| 6 | -6.166292 | 0.981334  | 4.123775  |
| 6 | -6.031715 | 2.300908  | 3.554237  |
| 6 | -5.995482 | -2.822982 | -3.039348 |
| 6 | -5.852739 | -3.684004 | -1.891249 |
| 6 | -5.766994 | 4.007114  | 1.277628  |
| 6 | -5.636386 | 4.189493  | -0.146915 |
| 6 | -5.560635 | -4.053460 | 0.928412  |
| 6 | -5.414282 | -3.514889 | 2.257402  |
| 6 | -5.369804 | 3.123041  | -2.785825 |
| 6 | -5.234871 | 1.997117  | -3.677066 |
| 6 | -5.125864 | -1.280635 | 4.016163  |
| 6 | -4.986503 | 0.140168  | 4.225191  |
| 6 | -4.959299 | -0.815662 | -4.091339 |
| 6 | -4.818975 | -2.152477 | -3.561822 |
| 6 | -4.716276 | 2.784337  | 3.178529  |
| 6 | -4.584438 | 3.682285  | 2.053014  |
| 6 | -4.533669 | -3.927170 | -1.341285 |
| 6 | -4.388397 | -4.155059 | 0.080990  |
| 6 | -4.323551 | 4.128509  | -0.756784 |
| 6 | -4.192129 | 3.625228  | -2.109245 |
| 6 | -4.097568 | -3.162858 | 2.743065  |
| 6 | -3.954346 | -2.054605 | 3.667721  |
| 6 | -3.923554 | 1.446025  | -3.933924 |
| 6 | -3.786910 | 0.024014  | -4.184954 |
| 6 | -3.675859 | 0.743485  | 4.159744  |
| 6 | -3.541062 | 2.101190  | 3.666557  |
| 6 | -3.507492 | -2.646547 | -3.215852 |
| 6 | -3.364970 | -3.578916 | -2.114704 |
| 6 | -3.277574 | 3.937056  | 1.495851  |
| 6 | -3.147351 | 4.203127  | 0.077084  |
| 6 | -3.075209 | -4.105299 | 0.677134  |
| 6 | -2.929642 | -3.639076 | 2.040241  |
| 6 | -2.883773 | 3.282986  | -2.613869 |
| 6 | -2.749632 | 2.204570  | -3.568274 |
| 6 | -2.642699 | -1.508388 | 3.920168  |

|   |           |           |           |
|---|-----------|-----------|-----------|
| 6 | -2.502633 | -0.099107 | 4.209102  |
| 6 | -2.475398 | -0.579715 | -4.141700 |
| 6 | -2.334882 | -1.944179 | -3.690758 |
| 6 | -2.230776 | 2.600401  | 3.316143  |
| 6 | -2.097736 | 3.560018  | 2.246028  |
| 6 | -2.048332 | -3.844331 | -1.576478 |
| 6 | -1.902423 | -4.150736 | -0.174185 |
| 6 | -1.835090 | 4.166172  | -0.533986 |
| 6 | -1.702980 | 3.740850  | -1.906510 |
| 6 | -1.610834 | -3.308472 | 2.540584  |
| 6 | -1.466932 | -2.260169 | 3.521795  |
| 6 | -1.434748 | 1.666059  | -3.851909 |
| 6 | -1.297722 | 0.267292  | -4.183662 |
| 6 | -1.186654 | 0.506422  | 4.174961  |
| 6 | -1.050406 | 1.884879  | 3.763994  |
| 6 | -1.017477 | -2.457052 | -3.373569 |
| 6 | -0.874167 | -3.450305 | -2.332025 |
| 6 | -0.784697 | 3.846093  | 1.704885  |
| 6 | -0.653745 | 4.194181  | 0.305962  |
| 6 | -0.584144 | -4.137673 | 0.424605  |
| 6 | -0.438792 | -3.750420 | 1.813015  |
| 6 | -0.391645 | 3.431043  | -2.433181 |
| 6 | -0.258641 | 2.406844  | -3.450208 |
| 6 | -0.153063 | -1.732764 | 3.812596  |
| 6 | -0.013293 | -0.338383 | 4.184471  |
| 6 | 0.013290  | -0.338220 | -4.184502 |
| 6 | 0.153061  | -1.732616 | -3.812686 |
| 6 | 0.258639  | 2.406712  | 3.450293  |
| 6 | 0.391645  | 3.430950  | 2.433306  |
| 6 | 0.438794  | -3.750351 | -1.813187 |
| 6 | 0.584147  | -4.137655 | -0.424791 |
| 6 | 0.653747  | 4.194191  | -0.305808 |
| 6 | 0.784699  | 3.846156  | -1.704745 |
| 6 | 0.874166  | -3.450393 | 2.331866  |
| 6 | 1.017474  | -2.457182 | 3.373450  |
| 6 | 1.050405  | 1.885024  | -3.763932 |
| 6 | 1.186653  | 0.506585  | -4.174959 |
| 6 | 1.297717  | 0.267129  | 4.183659  |
| 6 | 1.434744  | 1.665909  | 3.851965  |
| 6 | 1.466933  | -2.260031 | -3.521907 |
| 6 | 1.610836  | -3.308372 | -2.540738 |
| 6 | 1.702981  | 3.740776  | 1.906647  |
| 6 | 1.835092  | 4.166148  | 0.534140  |
| 6 | 1.902425  | -4.150738 | 0.174000  |
| 6 | 2.048332  | -3.844386 | 1.576305  |
| 6 | 2.097738  | 3.560101  | -2.245898 |
| 6 | 2.230778  | 2.600528  | -3.316053 |
| 6 | 2.334877  | -1.944321 | 3.690665  |
| 6 | 2.475391  | -0.579877 | 4.141666  |
| 6 | 2.502634  | -0.098942 | -4.209126 |
| 6 | 2.642702  | -1.508234 | -3.920251 |
| 6 | 2.749628  | 2.204432  | 3.568355  |
| 6 | 2.883771  | 3.282884  | 2.613992  |
| 6 | 2.929646  | -3.638993 | -2.040404 |
| 6 | 3.075213  | -4.105266 | -0.677315 |
| 6 | 3.147353  | 4.203124  | -0.076927 |
| 6 | 3.277576  | 3.937108  | -1.495705 |
| 6 | 3.364968  | -3.578992 | 2.114545  |
| 6 | 3.507486  | -2.646670 | 3.215733  |
| 6 | 3.541065  | 2.101332  | -3.666487 |
| 6 | 3.675861  | 0.743649  | -4.159733 |
| 6 | 3.786901  | 0.023850  | 4.184952  |
| 6 | 3.923547  | 1.445872  | 3.933980  |
| 6 | 3.954351  | -2.054461 | -3.667823 |
| 6 | 4.097573  | -3.162747 | -2.743208 |
| 6 | 4.192128  | 3.625142  | 2.109382  |
| 6 | 4.323553  | 4.128472  | 0.756939  |
| 6 | 4.388399  | -4.155046 | -0.081169 |
| 6 | 4.533668  | -3.927213 | 1.341115  |
| 6 | 4.584442  | 3.682358  | -2.052876 |



|   |           |           |           |
|---|-----------|-----------|-----------|
| 6 | 4.716280  | 2.784459  | -3.178430 |
| 6 | 4.818966  | -2.152614 | 3.561731  |
| 6 | 4.959289  | -0.815823 | 4.091306  |
| 6 | 4.986508  | 0.140335  | -4.225205 |
| 6 | 5.125871  | -1.280476 | -4.016233 |
| 6 | 5.234864  | 1.996973  | 3.677146  |
| 6 | 5.369801  | 3.122928  | 2.785947  |
| 6 | 5.414288  | -3.514794 | -2.257554 |
| 6 | 5.560639  | -4.053413 | -0.928583 |
| 6 | 5.636389  | 4.189476  | 0.147076  |
| 6 | 5.766998  | 4.007154  | -1.277474 |
| 6 | 5.852734  | -3.684069 | 1.891095  |
| 6 | 5.995474  | -2.823098 | 3.039233  |
| 6 | 6.031720  | 2.301046  | -3.554157 |
| 6 | 6.166298  | 0.981497  | -4.123753 |
| 6 | 6.277138  | -0.213718 | 4.166631  |
| 6 | 6.414502  | 1.214118  | 3.999814  |
| 6 | 6.445376  | -1.840819 | -3.793705 |
| 6 | 6.588773  | -2.997746 | -2.936441 |
| 6 | 6.685703  | 3.492357  | 2.300904  |
| 6 | 6.817122  | 4.068625  | 0.978711  |
| 6 | 6.880512  | -4.139202 | -0.336115 |
| 6 | 7.025265  | -3.991348 | 1.098159  |
| 6 | 7.077544  | 3.788432  | -1.850795 |
| 6 | 7.209297  | 2.957681  | -3.034136 |
| 6 | 7.309559  | -2.353508 | 3.418815  |
| 6 | 7.450235  | -1.045598 | 4.032907  |
| 6 | 7.476382  | 0.385444  | -4.231319 |
| 6 | 7.613442  | -1.055588 | -4.103389 |
| 6 | 7.724510  | 1.779073  | 3.781531  |
| 6 | 7.857890  | 2.959993  | 2.948361  |
| 6 | 7.899700  | -3.377062 | -2.475228 |
| 6 | 8.045945  | -3.992418 | -1.171699 |
| 6 | 8.123503  | 4.158837  | 0.374302  |
| 6 | 8.251667  | 4.053417  | -1.061755 |
| 6 | 8.337231  | -3.774289 | 1.657031  |
| 6 | 8.477772  | -2.977331 | 2.853140  |
| 6 | 8.516531  | 2.492823  | -3.432970 |
| 6 | 8.648257  | 1.209085  | -4.069978 |
| 6 | 8.761139  | -0.447800 | 4.136594  |
| 6 | 8.897277  | 0.980836  | 4.045284  |
| 6 | 8.926610  | -1.621462 | -3.898755 |
| 6 | 9.070807  | -2.810382 | -3.109976 |
| 6 | 9.170530  | 3.341397  | 2.474504  |
| 6 | 9.302943  | 3.978823  | 1.197471  |
| 6 | 9.365780  | -4.092561 | -0.583255 |
| 6 | 9.510609  | -4.023275 | 0.840448  |
| 6 | 9.568828  | 3.852383  | -1.643625 |
| 6 | 9.706323  | 3.111150  | -2.869121 |
| 6 | 9.799840  | -2.520417 | 3.251149  |
| 6 | 9.946489  | -1.269798 | 3.947807  |
| 6 | 9.975394  | 0.621556  | -4.216096 |
| 6 | 10.111984 | -0.821203 | -4.176425 |
| 6 | 10.224986 | 1.557305  | 3.865206  |
| 6 | 10.359507 | 2.782589  | 3.100005  |
| 6 | 10.399187 | -3.221446 | -2.680832 |
| 6 | 10.547134 | -3.910761 | -1.412132 |
| 6 | 10.622505 | 4.114473  | 0.605615  |
| 6 | 10.742813 | 4.092647  | -0.839646 |
| 6 | 10.834458 | -3.854108 | 1.411665  |
| 6 | 10.966956 | -3.128350 | 2.660709  |
| 6 | 11.025415 | 2.717963  | -3.335031 |
| 6 | 11.145792 | 1.445525  | -4.095048 |
| 6 | 11.268105 | -0.700858 | 4.145109  |
| 6 | 11.393941 | 0.778418  | 4.162977  |
| 6 | 11.416288 | -1.416702 | -4.073868 |
| 6 | 11.560005 | -2.682480 | -3.334206 |
| 6 | 11.664330 | 3.230990  | 2.688614  |
| 6 | 11.797983 | 3.947249  | 1.414935  |
| 6 | 11.857697 | -4.091713 | -0.845046 |

|   |            |           |           |
|---|------------|-----------|-----------|
| 6 | 12.003577  | -4.100149 | 0.612078  |
| 6 | 12.044172  | 3.954322  | -1.447158 |
| 6 | 12.154967  | 3.319040  | -2.718916 |
| 6 | 12.273674  | -2.711914 | 3.110885  |
| 6 | 12.394642  | -1.533521 | 3.900875  |
| 6 | 12.414700  | 0.817115  | -4.356139 |
| 6 | 12.545133  | -0.566557 | -4.362351 |
| 6 | 12.667930  | 1.446813  | 4.058927  |
| 6 | 12.798480  | 2.638283  | 3.360469  |
| 6 | 12.845359  | -3.199232 | -2.919726 |
| 6 | 12.987578  | -3.891195 | -1.729071 |
| 6 | 13.086548  | 4.161551  | 0.773664  |
| 6 | 13.207194  | 4.183612  | -0.599533 |
| 6 | 13.299112  | -3.980498 | 1.267532  |
| 6 | 13.431056  | -3.332352 | 2.475710  |
| 1 | -14.427145 | -3.156405 | -2.905164 |
| 1 | -14.197367 | -4.324530 | -0.738875 |
| 1 | -14.199985 | 4.237667  | 1.067567  |
| 1 | -13.990800 | 4.202153  | -1.394451 |
| 1 | -13.993704 | -4.166512 | 1.387642  |
| 1 | -13.741778 | -2.938923 | 3.497091  |
| 1 | -13.801341 | 3.053174  | -3.196114 |
| 1 | -13.571670 | 0.945990  | -4.429339 |
| 1 | -13.548258 | -1.006005 | 4.437145  |
| 1 | -13.319239 | 1.434991  | 4.425341  |
| 1 | -13.404913 | -1.155725 | -4.103154 |
| 1 | -13.162653 | 3.091686  | 3.089120  |
| 1 | 13.162653  | 3.091815  | -3.089001 |
| 1 | 13.404868  | -1.155935 | 4.103230  |
| 1 | 13.319246  | 1.435174  | -4.425293 |
| 1 | 13.548270  | -1.005825 | -4.437195 |
| 1 | 13.571653  | 0.945815  | 4.429441  |
| 1 | 13.801328  | 3.053038  | 3.196287  |
| 1 | 13.741796  | -2.938749 | -3.497176 |
| 1 | 13.993707  | -4.166397 | -1.387767 |
| 1 | 13.990803  | 4.202050  | 1.394634  |
| 1 | 14.199993  | 4.237669  | -1.067379 |
| 1 | 14.197367  | -4.324536 | 0.738741  |
| 1 | 14.427130  | -3.156532 | 2.905095  |

Nanotube (7,5) u10v11  
B3LYP/STO-3G Energy: -9877.686189

|   |            |           |           |
|---|------------|-----------|-----------|
| 6 | -13.534389 | -2.529526 | -3.294239 |
| 6 | -13.412889 | -3.466351 | -2.292206 |
| 6 | -13.297984 | 3.941669  | 1.603759  |
| 6 | -13.168517 | 4.272648  | 0.272008  |
| 6 | -13.119473 | -4.151851 | 0.628480  |
| 6 | -12.981562 | -3.790007 | 1.957300  |
| 6 | -12.869871 | 3.464703  | -2.618194 |
| 6 | -12.739951 | 2.491764  | -3.597961 |
| 6 | -12.679073 | -1.617535 | 4.028424  |
| 6 | -12.542890 | -0.279503 | 4.377238  |
| 6 | -12.480953 | -0.431684 | -4.205688 |
| 6 | -12.370163 | -1.773234 | -3.743291 |
| 6 | -12.262696 | 2.556343  | 3.435575  |
| 6 | -12.141166 | 3.495577  | 2.370309  |
| 6 | -12.121692 | -3.757603 | -1.682627 |
| 6 | -11.984748 | -4.124580 | -0.272195 |
| 6 | -11.876299 | 4.223139  | -0.396217 |
| 6 | -11.737324 | 3.857956  | -1.809983 |
| 6 | -11.696149 | -3.404169 | 2.496930  |
| 6 | -11.551654 | -2.371795 | 3.536957  |
| 6 | -11.467859 | 1.864212  | -3.862699 |
| 6 | -11.348739 | 0.429339  | -4.223320 |
| 6 | -11.269374 | 0.387878  | 4.291808  |
| 6 | -11.139075 | 1.811383  | 3.883499  |
| 6 | -11.067935 | -2.299109 | -3.408615 |

|   |            |           |           |
|---|------------|-----------|-----------|
| 6 | -10.946460 | -3.321780 | -2.386876 |
| 6 | -10.835150 | 3.778565  | 1.825708  |
| 6 | -10.705404 | 4.170531  | 0.435189  |
| 6 | -10.676834 | -4.103603 | 0.328897  |
| 6 | -10.533643 | -3.764325 | 1.732973  |
| 6 | -10.431739 | 3.522941  | -2.316120 |
| 6 | -10.297588 | 2.534054  | -3.369489 |
| 6 | -10.245537 | -1.829954 | 3.795532  |
| 6 | -10.103276 | -0.446126 | 4.204168  |
| 6 | -10.031230 | -0.179070 | -4.171842 |
| 6 | -9.894657  | -1.567296 | -3.817839 |
| 6 | -9.815768  | 2.303722  | 3.540897  |
| 6 | -9.667545  | 3.333593  | 2.547093  |
| 6 | -9.627191  | -3.639716 | -1.871671 |
| 6 | -9.491417  | -4.073053 | -0.512951 |
| 6 | -9.382763  | 4.183890  | -0.164842 |
| 6 | -9.244687  | 3.895066  | -1.561769 |
| 6 | -9.206287  | -3.484426 | 2.259662  |
| 6 | -9.061891  | -2.538626 | 3.327472  |
| 6 | -8.971360  | 2.014762  | -3.683896 |
| 6 | -8.840992  | 0.656948  | -4.137318 |
| 6 | -8.772834  | 0.151947  | 4.219507  |
| 6 | -8.631905  | 1.554707  | 3.933361  |
| 6 | -8.577056  | -2.118737 | -3.543322 |
| 6 | -8.447489  | -3.196154 | -2.591315 |
| 6 | -8.345591  | 3.669770  | 2.042954  |
| 6 | -8.207639  | 4.139515  | 0.683350  |
| 6 | -8.174408  | -4.134836 | 0.088151  |
| 6 | -8.033327  | -3.875712 | 1.506129  |
| 6 | -7.930124  | 3.640143  | -2.110823 |
| 6 | -7.796403  | 2.712017  | -3.218012 |
| 6 | -7.747099  | -2.051310 | 3.676717  |
| 6 | -7.604904  | -0.692355 | 4.170382  |
| 6 | -7.533084  | 0.044614  | -4.183770 |
| 6 | -7.402287  | -1.377658 | -3.924842 |
| 6 | -7.319979  | 2.099296  | 3.674030  |
| 6 | -7.177454  | 3.205050  | 2.744084  |
| 6 | -7.139818  | -3.557603 | -2.100612 |
| 6 | -7.004477  | -4.069464 | -0.751564 |
| 6 | -6.897615  | 4.200570  | 0.082782  |
| 6 | -6.759960  | 3.982077  | -1.342502 |
| 6 | -6.723514  | -3.635125 | 2.055815  |
| 6 | -6.580452  | -2.737450 | 3.181998  |
| 6 | -6.487635  | 2.214285  | -3.567292 |
| 6 | -6.355706  | 0.875935  | -4.094007 |
| 6 | -6.291934  | -0.095865 | 4.225977  |
| 6 | -6.148635  | 1.324987  | 4.014412  |
| 6 | -6.093114  | -1.936861 | -3.672076 |
| 6 | -5.961456  | -3.064359 | -2.782440 |
| 6 | -5.862688  | 3.556377  | 2.252881  |
| 6 | -5.722118  | 4.097130  | 0.923557  |
| 6 | -5.688111  | -4.146048 | -0.150428 |
| 6 | -5.547305  | -3.966960 | 1.272674  |
| 6 | -5.442639  | 3.741198  | -1.899071 |
| 6 | -5.306745  | 2.880785  | -3.048022 |
| 6 | -5.259944  | -2.259823 | 3.546701  |
| 6 | -5.116049  | -0.941370 | 4.113574  |
| 6 | -5.041115  | 0.266617  | -4.168378 |
| 6 | -4.910331  | -1.161466 | -3.998966 |
| 6 | -4.828738  | 1.881362  | 3.781676  |
| 6 | -4.686217  | 3.036750  | 2.925270  |
| 6 | -4.646739  | -3.448205 | -2.306588 |
| 6 | -4.510980  | -4.033575 | -0.990197 |
| 6 | -4.405151  | 4.186897  | 0.325113  |
| 6 | -4.266781  | 4.046266  | -1.109839 |
| 6 | -4.231447  | -3.758238 | 1.838620  |
| 6 | -4.088957  | -2.925094 | 3.016724  |
| 6 | -3.995633  | 2.405919  | -3.430701 |
| 6 | -3.863906  | 1.095482  | -4.037421 |
| 6 | -3.802087  | -0.348617 | 4.211779  |

|   |           |           |           |
|---|-----------|-----------|-----------|
| 6 | -3.659014 | 1.089410  | 4.084604  |
| 6 | -3.603033 | -1.736062 | -3.785443 |
| 6 | -3.471685 | -2.920633 | -2.959927 |
| 6 | -3.374634 | 3.419381  | 2.459318  |
| 6 | -3.234116 | 4.039471  | 1.156632  |
| 6 | -3.200987 | -4.146433 | -0.395002 |
| 6 | -3.061351 | -4.045495 | 1.042917  |
| 6 | -2.956549 | 3.837317  | -1.678545 |
| 6 | -2.820826 | 3.038345  | -2.876899 |
| 6 | -2.776537 | -2.469135 | 3.407110  |
| 6 | -2.632650 | -1.181747 | 4.048891  |
| 6 | -2.555797 | 0.492994  | -4.144341 |
| 6 | -2.424737 | -0.942674 | -4.058663 |
| 6 | -2.344989 | 1.654968  | 3.881136  |
| 6 | -2.201625 | 2.856411  | 3.093944  |
| 6 | -2.160094 | -3.323469 | -2.501768 |
| 6 | -2.023882 | -3.979467 | -1.223977 |
| 6 | -1.918405 | 4.152588  | 0.563311  |
| 6 | -1.778757 | 4.091388  | -0.871250 |
| 6 | -1.744160 | -3.860698 | 1.617124  |
| 6 | -1.601418 | -3.099418 | 2.834284  |
| 6 | -1.506597 | 2.581806  | -3.281462 |
| 6 | -1.373998 | 1.314879  | -3.960243 |
| 6 | -1.313863 | -0.594685 | 4.177256  |
| 6 | -1.169886 | 0.841820  | 4.135750  |
| 6 | -1.111865 | -1.528088 | -3.877316 |
| 6 | -0.979663 | -2.755713 | -3.125786 |
| 6 | -0.883746 | 3.264849  | 2.651083  |
| 6 | -0.742166 | 3.958320  | 1.389242  |
| 6 | -0.708686 | -4.127409 | -0.635564 |
| 6 | -0.569358 | -4.108257 | 0.805608  |
| 6 | -0.464465 | 3.918105  | -1.452545 |
| 6 | -0.329019 | 3.187539  | -2.696356 |
| 6 | -0.286349 | -2.670938 | 3.256291  |
| 6 | -0.143272 | -1.419820 | 3.974588  |
| 6 | -0.065240 | 0.721570  | -4.110318 |
| 6 | 0.065233  | -0.722081 | -4.110234 |
| 6 | 0.143264  | 1.420290  | 3.974423  |
| 6 | 0.286346  | 2.671323  | 3.255978  |
| 6 | 0.329021  | -3.187881 | -2.695980 |
| 6 | 0.464473  | -3.918293 | -1.452079 |
| 6 | 0.569365  | 4.108340  | 0.805120  |
| 6 | 0.708693  | 4.127314  | -0.636054 |
| 6 | 0.742173  | -3.958156 | 1.389711  |
| 6 | 0.883747  | -3.264533 | 2.651470  |
| 6 | 0.979662  | 2.755317  | -3.126113 |
| 6 | 1.111859  | 1.527605  | -3.877500 |
| 6 | 1.169877  | -0.841331 | 4.135856  |
| 6 | 1.313853  | 0.595180  | 4.177196  |
| 6 | 1.373992  | -1.315371 | -3.960097 |
| 6 | 1.506597  | -2.582216 | -3.281162 |
| 6 | 1.601416  | 3.099748  | 2.833923  |
| 6 | 1.744164  | 3.860876  | 1.616669  |
| 6 | 1.778767  | -4.091494 | -0.870763 |
| 6 | 1.918416  | -4.152517 | 0.563806  |
| 6 | 2.023887  | 3.979293  | -1.224448 |
| 6 | 2.160094  | 3.323144  | -2.502162 |
| 6 | 2.201624  | -2.856039 | 3.094288  |
| 6 | 2.344982  | -1.654507 | 3.881344  |
| 6 | 2.424729  | 0.942171  | -4.058788 |
| 6 | 2.555790  | -0.493507 | -4.144299 |
| 6 | 2.632640  | 1.182227  | 4.048771  |
| 6 | 2.776532  | 2.469535  | 3.406832  |
| 6 | 2.820830  | -3.038700 | -2.876545 |
| 6 | 2.956559  | -3.837517 | -1.678089 |
| 6 | 3.061355  | 4.045594  | 1.042438  |
| 6 | 3.200992  | 4.146353  | -0.395493 |
| 6 | 3.234126  | -4.039318 | 1.157114  |
| 6 | 3.374639  | -3.419077 | 2.459730  |
| 6 | 3.471682  | 2.920254  | -2.960278 |

|   |           |           |           |
|---|-----------|-----------|-----------|
| 6 | 3.603025  | 1.735592  | -3.785663 |
| 6 | 3.659005  | -1.088925 | 4.084758  |
| 6 | 3.802076  | 0.349116  | 4.211767  |
| 6 | 3.863900  | -1.095980 | -4.037315 |
| 6 | 3.995634  | -2.406340 | -3.430430 |
| 6 | 4.088954  | 2.925443  | 3.016390  |
| 6 | 4.231448  | 3.758432  | 1.838178  |
| 6 | 4.266794  | -4.046382 | -1.109356 |
| 6 | 4.405165  | -4.186833 | 0.325614  |
| 6 | 4.510983  | 4.033417  | -0.990675 |
| 6 | 4.646737  | 3.447898  | -2.307000 |
| 6 | 4.686219  | -3.036389 | 2.925643  |
| 6 | 4.828733  | -1.880909 | 3.781925  |
| 6 | 4.910322  | 1.160974  | -3.999131 |
| 6 | 5.041105  | -0.267128 | -4.168379 |
| 6 | 5.116038  | 0.941860  | 4.113500  |
| 6 | 5.259938  | 2.260241  | 3.546459  |
| 6 | 5.306749  | -2.881149 | -3.047692 |
| 6 | 5.442652  | -3.741407 | -1.898626 |
| 6 | 5.547308  | 3.967075  | 1.272205  |
| 6 | 5.688114  | 4.145984  | -0.150919 |
| 6 | 5.722134  | -4.096983 | 0.924049  |
| 6 | 5.862696  | -3.556083 | 2.253314  |
| 6 | 5.961451  | 3.063999  | -2.782813 |
| 6 | 6.093104  | 1.936408  | -3.672332 |
| 6 | 6.148627  | -1.324506 | 4.014611  |
| 6 | 6.291923  | 0.096371  | 4.226015  |
| 6 | 6.355699  | -0.876433 | -4.093944 |
| 6 | 6.487635  | -2.214714 | -3.567056 |
| 6 | 6.580447  | 2.737818  | 3.181696  |
| 6 | 6.723514  | 3.635339  | 2.055390  |
| 6 | 6.759976  | -3.982199 | -1.342025 |
| 6 | 6.897634  | -4.200510 | 0.083287  |
| 6 | 7.004480  | 4.069322  | -0.752046 |
| 6 | 7.139815  | 3.557313  | -2.101039 |
| 6 | 7.177460  | -3.204697 | 2.744483  |
| 6 | 7.319975  | -2.098849 | 3.674320  |
| 6 | 7.402275  | 1.377181  | -3.925047 |
| 6 | 7.533072  | -0.045119 | -4.183817 |
| 6 | 7.604892  | 0.692856  | 4.170358  |
| 6 | 7.747091  | 2.051745  | 3.676513  |
| 6 | 7.796407  | -2.712390 | -3.217713 |
| 6 | 7.930138  | -3.640358 | -2.110392 |
| 6 | 8.033329  | 3.875844  | 1.505671  |
| 6 | 8.174412  | 4.134786  | 0.087661  |
| 6 | 8.207659  | -4.139368 | 0.683849  |
| 6 | 8.345604  | -3.669478 | 2.043403  |
| 6 | 8.447484  | 3.195812  | -2.591707 |
| 6 | 8.577045  | 2.118303  | -3.543610 |
| 6 | 8.631897  | -1.554229 | 3.933606  |
| 6 | 8.772822  | -0.151438 | 4.219598  |
| 6 | 8.840982  | -0.657443 | -4.137303 |
| 6 | 8.971358  | -2.015195 | -3.683702 |
| 6 | 9.061884  | 2.539012  | 3.327205  |
| 6 | 9.206287  | 3.484658  | 2.259259  |
| 6 | 9.244706  | -3.895189 | -1.561304 |
| 6 | 9.382786  | -4.183828 | -0.164337 |
| 6 | 9.491421  | 4.072924  | -0.513435 |
| 6 | 9.627189  | 3.639442  | -1.872110 |
| 6 | 9.667555  | -3.333241 | 2.547514  |
| 6 | 9.815766  | -2.303279 | 3.541224  |
| 6 | 9.894643  | 1.566837  | -3.818084 |
| 6 | 10.031215 | 0.178575  | -4.171941 |
| 6 | 10.103262 | 0.446637  | 4.204200  |
| 6 | 10.245526 | 1.830409  | 3.795375  |
| 6 | 10.297591 | -2.534433 | -3.369230 |
| 6 | 10.431752 | -3.523160 | -2.315711 |
| 6 | 10.533646 | 3.764473  | 1.732530  |
| 6 | 10.676839 | 4.103562  | 0.328408  |
| 6 | 10.705427 | -4.170378 | 0.435692  |

|   |            |           |           |
|---|------------|-----------|-----------|
| 6 | 10.835167  | -3.778266 | 1.826172  |
| 6 | 10.946454  | 3.321452  | -2.387289 |
| 6 | 11.067922  | 2.298692  | -3.408939 |
| 6 | 11.139068  | -1.810899 | 3.883792  |
| 6 | 11.269360  | -0.387354 | 4.291955  |
| 6 | 11.348725  | -0.429835 | -4.223370 |
| 6 | 11.467856  | -1.864657 | -3.862552 |
| 6 | 11.551645  | 2.372210  | 3.536731  |
| 6 | 11.696149  | 3.404421  | 2.496542  |
| 6 | 11.737342  | -3.858082 | -1.809526 |
| 6 | 11.876324  | -4.223062 | -0.395709 |
| 6 | 11.984754  | 4.124451  | -0.272689 |
| 6 | 12.121691  | 3.757334  | -1.683086 |
| 6 | 12.141180  | -3.495208 | 2.370747  |
| 6 | 12.262697  | -2.555887 | 3.435938  |
| 6 | 12.370147  | 1.772793  | -3.743590 |
| 6 | 12.480933  | 0.431202  | -4.205878 |
| 6 | 12.542875  | 0.280041  | 4.377325  |
| 6 | 12.679059  | 1.618025  | 4.028329  |
| 6 | 12.739952  | -2.492162 | -3.597730 |
| 6 | 12.869884  | -3.464942 | -2.617804 |
| 6 | 12.981566  | 3.790157  | 1.956852  |
| 6 | 13.119481  | 4.151811  | 0.627979  |
| 6 | 13.168545  | -4.272454 | 0.272519  |
| 6 | 13.298006  | -3.941339 | 1.604237  |
| 6 | 13.412884  | 3.466028  | -2.292652 |
| 6 | 13.534375  | 2.529129  | -3.294618 |
| 1 | -14.526815 | -2.244244 | -3.669864 |
| 1 | -14.315805 | -3.929964 | -1.874270 |
| 1 | -14.293489 | 3.879665  | 2.064832  |
| 1 | -14.068371 | 4.477030  | -0.322502 |
| 1 | -14.124494 | -4.325169 | 0.223010  |
| 1 | -13.880190 | -3.682170 | 2.578385  |
| 1 | -13.871646 | 3.830676  | -2.359191 |
| 1 | -13.643055 | 2.108743  | -4.090595 |
| 1 | -13.684252 | -2.056248 | 3.984090  |
| 1 | -13.445059 | 0.305315  | 4.598787  |
| 1 | -13.488076 | -0.008712 | -4.310156 |
| 1 | -13.273604 | 2.247290  | 3.730109  |
| 1 | 13.273603  | -2.246799 | 3.730442  |
| 1 | 13.488033  | 0.008244  | -4.310373 |
| 1 | 13.445040  | -0.304746 | 4.598970  |
| 1 | 13.684234  | 2.056739  | 3.983961  |
| 1 | 13.643051  | -2.109219 | -4.090435 |
| 1 | 13.871662  | -3.830867 | -2.358745 |
| 1 | 13.880196  | 3.682392  | 2.577948  |
| 1 | 14.124501  | 4.325046  | 0.222483  |
| 1 | 14.068404  | -4.476866 | -0.321973 |
| 1 | 14.293513  | -3.879259 | 2.065298  |
| 1 | 14.315802  | 3.929676  | -1.874761 |
| 1 | 14.526795  | 2.243829  | -3.670234 |
